# Supplementary material
Source: PubMed Central journal article supplement (PMC5488868)
Supplement: NIHMS863237-supplement-Supp_TableS1.pdf [file NIHMS863237-supplement-Supp_TableS1.pdf]

Supplemental Table 1: Statistical identification of differentially regulated pathways in *ceh1*, *ceh1/eds16*, and *eds16*. FDR-corrected p value of pathway enrichment from GAGE are shown for each pathway. Values shown in gray represent uncorrected p-values, shown to support related pathways or other analyses.

|      |                 |                                             | <i>ceh1</i> |         | <i>ceh1/eds16</i> |         | <i>eds16</i> |          |
|------|-----------------|---------------------------------------------|-------------|---------|-------------------|---------|--------------|----------|
|      | KEGG identifier | Pathway name                                | RNA         | protein | RNA               | protein | RNA          | protein  |
| up   | ath04141        | Protein processing in endoplasmic reticulum | 7.18E-09    | 0.010   | 0.001             | 0.035   |              |          |
|      | ath04626        | Plant-pathogen interaction                  | 7.88E-07    |         | 4.82E-04          |         |              |          |
|      | ath03050        | Proteasome                                  | 7.73E-05    |         | 0.031             |         |              |          |
|      | ath00480        | Glutathione metabolism                      | 0.012       |         | 0.002             |         |              |          |
|      | ath03060        | Protein export                              | 0.038       |         |                   |         |              |          |
|      | ath04145        | Phagosome                                   | 0.047       |         |                   |         |              |          |
|      | ath00592        | alpha-Linolenic acid metabolism             |             | 0.078   | 0.039             | 0.015   |              |          |
|      | ath00710        | Carbon fixation in photosynthetic organisms |             |         |                   | 0.024   | 0.081        |          |
|      | ath01200        | Carbon metabolism                           |             |         |                   | 0.026   |              |          |
|      | ath01230        | Biosynthesis of amino acids                 |             |         |                   | 0.004   |              |          |
|      | ath00630        | Glyoxylate and dicarboxylate metabolism     |             |         |                   | 0.008   |              |          |
|      | ath00380        | Tryptophan metabolism                       |             |         |                   | 0.016   |              |          |
|      | ath00030        | Pentose phosphate pathway                   |             |         |                   | 0.031   |              |          |
|      | ath00195        | Photosynthesis                              |             |         |                   |         |              | 2.51E-05 |
|      |                 |                                             |             |         |                   |         |              |          |
|      | KEGG identifier | Pathway name                                | RNA         | protein | RNA               | protein | RNA          | protein  |
| down | ath00195        | Photosynthesis                              | 1.24E-12    | 0.070   | 8.69E-09          |         |              |          |
|      | ath01200        | Carbon metabolism                           | 1.41E-06    |         |                   |         |              |          |
|      | ath00710        | Carbon fixation in photosynthetic organisms | 5.15E-06    | 0.018   | 0.026             |         |              |          |
|      | ath00630        | Glyoxylate and dicarboxylate metabolism     | 9.76E-05    | 0.029   |                   |         |              |          |
|      | ath00860        | Porphyrin and chlorophyll metabolism        | 8.72E-04    |         | 0.006             |         |              |          |
|      | ath00260        | Glycine, serine and threonine metabolism    | 0.003       |         |                   |         |              |          |
|      | ath01230        | Biosynthesis of amino acids                 | 0.015       |         |                   |         |              |          |
|      | ath00030        | Pentose phosphate pathway                   | 0.026       |         |                   |         |              |          |
