# Supplementary material
Source: PubMed Central journal article supplement (PMC5488868)
Supplement: NIHMS863237-supplement-Supp_TableS2.pdf [file NIHMS863237-supplement-Supp_TableS2.pdf]

Table S2. Gene lists of identified KEGG pathways

| Pathway                                     | Genes                           |           |           |           |           |           |           |           |           |           |           |           |
|---------------------------------------------|---------------------------------|-----------|-----------|-----------|-----------|-----------|-----------|-----------|-----------|-----------|-----------|-----------|
| Protein processing in endoplasmic reticulum | AT1G02620                       | AT1G02980 | AT1G04980 | AT1G05520 | AT1G07400 | AT1G08450 | AT1G09080 | AT1G09180 | AT1G09210 | AT1G10230 | AT1G11560 |           |
|                                             | AT1G11905                       | AT1G16030 | AT1G16190 | AT1G17280 | AT1G18260 | AT1G18830 | AT1G19310 | AT1G20140 | AT1G21750 | AT1G24320 | AT1G27520 |           |
|                                             | AT1G29310                       | AT1G30000 | AT1G32210 | AT1G34130 | AT1G35620 | AT1G43140 | AT1G50670 | AT1G51590 | AT1G52260 | AT1G52560 | AT1G53540 |           |
|                                             | AT1G54050                       | AT1G56330 | AT1G56340 | AT1G56410 | AT1G59790 | AT1G59800 | AT1G59860 | AT1G61790 | AT1G64230 | AT1G65040 | AT1G67490 |           |
|                                             | AT1G71220                       | AT1G72280 | AT1G75950 | AT1G76400 | AT1G77510 | AT1G78720 | AT1G79650 | AT1G79940 | AT2G01470 | AT2G01650 | AT2G01720 |           |
|                                             | AT2G03160                       | AT2G03170 | AT2G03190 | AT2G04030 | AT2G16595 | AT2G16740 | AT2G17190 | AT2G17200 | AT2G18710 | AT2G20160 |           |           |
|                                             | AT2G21160                       | AT2G21270 | AT2G21630 | AT2G23780 | AT2G25700 | AT2G29070 | AT2G29500 | AT2G30050 | AT2G32920 | AT2G34250 | AT2G35520 |           |
|                                             | AT2G38960                       | AT2G40290 | AT2G45070 | AT2G47470 | AT2G47970 | AT3G01340 | AT3G02540 | AT3G07100 | AT3G07190 | AT3G07370 | AT3G07770 |           |
|                                             | AT3G08690                       | AT3G09350 | AT3G09440 | AT3G09840 | AT3G12580 | AT3G16090 | AT3G16110 | AT3G17000 | AT3G18860 | AT3G20450 | AT3G20920 |           |
|                                             | AT3G21160                       | AT3G21660 | AT3G21830 | AT3G21840 | AT3G21850 | AT3G21860 | AT3G23660 | AT3G25650 | AT3G42830 | AT3G44110 | AT3G44340 |           |
|                                             | AT3G46230                       | AT3G46460 | AT3G48570 | AT3G51980 | AT3G52190 | AT3G53060 | AT3G53230 | AT3G53800 | AT3G54130 | AT3G54960 | AT3G55380 |           |
|                                             | AT3G57340                       | AT3G58030 | AT3G59410 | AT3G60010 | AT3G60020 | AT3G60540 | AT3G62560 | AT3G62600 | AT3G63000 | AT3G63460 | AT4G02080 |           |
|                                             | AT4G02570                       | AT4G03510 | AT4G04210 | AT4G04860 | AT4G10250 | AT4G14160 | AT4G15410 | AT4G16660 | AT4G20310 | AT4G21150 | AT4G21180 |           |
|                                             | AT4G21810                       | AT4G21870 | AT4G22150 | AT4G24190 | AT4G24280 | AT4G24920 | AT4G25200 | AT4G25230 | AT4G27470 | AT4G27670 | AT4G28270 |           |
|                                             | AT4G29330                       | AT4G32640 | AT4G32670 | AT4G34100 | AT4G34210 | AT4G34470 | AT4G38930 | AT5G02150 | AT5G02490 | AT5G02500 | AT5G03160 |           |
|                                             | AT5G03340                       | AT5G05470 | AT5G05750 | AT5G07340 | AT5G09590 | AT5G12020 | AT5G12030 | AT5G14030 | AT5G15400 | AT5G16090 | AT5G19660 |           |
|                                             | AT5G19690                       | AT5G20570 | AT5G20970 | AT5G22060 | AT5G28540 | AT5G35080 | AT5G37670 | AT5G38470 | AT5G42020 | AT5G42190 | AT5G42570 |           |
|                                             | AT5G43670                       | AT5G43710 | AT5G48660 | AT5G49060 | AT5G49570 | AT5G49910 | AT5G50430 | AT5G50460 | AT5G50550 | AT5G50650 | AT5G51440 |           |
|                                             | AT5G51450                       | AT5G52640 | AT5G56000 | AT5G56010 | AT5G56030 | AT5G56150 | AT5G56360 | AT5G59300 | AT5G59720 | AT5G60460 | AT5G60640 |           |
|                                             | AT5G61790                       | AT5G63840 | AT5G66680 |           |           |           |           |           |           |           |           |           |
|                                             | Plant-pathogen interaction      | AT1G01120 | AT1G01340 | AT1G05990 | AT1G06700 | AT1G12220 | AT1G12310 | AT1G15990 | AT1G18210 | AT1G18530 | AT1G18890 | AT1G19230 |
|                                             |                                 | AT1G19780 | AT1G21550 | AT1G24620 | AT1G32250 | AT1G35670 | AT1G50060 | AT1G50700 | AT1G51660 | AT1G61950 | AT1G62820 | AT1G64060 |
|                                             |                                 | AT1G66400 | AT1G66410 | AT1G73630 | AT1G74740 | AT1G76040 | AT1G76640 | AT1G76650 | AT1G80460 | AT2G04030 | AT2G04880 | AT2G13790 |
|                                             |                                 | AT2G14580 | AT2G14610 | AT2G15680 | AT2G17290 | AT2G17890 | AT2G19190 | AT2G23980 | AT2G24610 | AT2G26250 | AT2G27030 | AT2G27480 |
|                                             |                                 | AT2G28260 | AT2G30250 | AT2G31500 | AT2G35890 | AT2G36180 | AT2G38470 | AT2G38910 | AT2G41090 | AT2G41110 | AT2G41110 | AT2G41410 |
|                                             |                                 | AT2G41860 | AT2G43290 | AT2G43790 | AT2G46430 | AT2G46450 | AT3G01830 | AT3G03000 | AT3G03400 | AT3G03410 | AT3G03430 | AT3G07040 |
|                                             |                                 | AT3G07490 | AT3G07770 | AT3G10190 | AT3G10300 | AT3G10660 | AT3G17690 | AT3G17700 | AT3G19690 | AT3G20410 | AT3G21220 | AT3G21630 |
|                                             |                                 | AT3G22930 | AT3G24110 | AT3G25070 | AT3G25600 | AT3G28910 | AT3G43810 | AT3G45640 | AT3G47450 | AT3G47480 | AT3G48010 | AT3G48080 |
| AT3G48090                                   |                                 | AT3G50360 | AT3G50770 | AT3G51850 | AT3G51920 | AT3G56800 | AT3G57530 | AT3G59350 | AT3G62220 | AT4G01010 |           |           |
| AT4G01250                                   |                                 | AT4G01370 | AT4G03290 | AT4G04695 | AT4G04700 | AT4G04710 | AT4G04720 | AT4G04740 | AT4G08500 | AT4G09570 | AT4G11230 |           |
| AT4G11260                                   |                                 | AT4G12860 | AT4G14440 | AT4G14640 | AT4G20780 | AT4G21940 | AT4G23550 | AT4G23570 | AT4G23650 | AT4G24190 | AT4G25090 |           |
| AT4G26090                                   |                                 | AT4G26470 | AT4G30360 | AT4G30560 | AT4G33430 | AT4G33720 | AT4G35310 | AT4G36070 | AT4G37010 | AT4G38230 | AT4G39090 |           |
| AT5G04170                                   |                                 | AT5G04870 | AT5G07390 | AT5G12180 | AT5G12480 | AT5G13160 | AT5G14870 | AT5G15410 | AT5G17470 | AT5G17480 | AT5G19360 |           |
| AT5G19450                                   |                                 | AT5G20480 | AT5G21274 | AT5G23580 | AT5G37770 | AT5G37780 | AT5G42380 | AT5G44460 | AT5G45250 | AT5G45260 | AT5G46330 |           |
| AT5G47910                                   |                                 | AT5G51060 | AT5G51700 | AT5G52640 | AT5G53130 | AT5G56000 | AT5G56010 | AT5G56030 | AT5G56270 | AT5G56580 | AT5G57940 |           |
| AT5G66210                                   |                                 |           |           |           |           |           |           |           |           |           |           |           |
| Proteasome                                  |                                 | AT1G04810 | AT1G09100 | AT1G13060 | AT1G16470 | AT1G20200 | AT1G21720 | AT1G29150 | AT1G45000 | AT1G47250 | AT1G53750 | AT1G53780 |
|                                             |                                 | AT1G53850 | AT1G56450 | AT1G64520 | AT1G64750 | AT1G67250 | AT1G75990 | AT1G77440 | AT1G79210 | AT2G05840 | AT2G20140 | AT2G20580 |
|                                             |                                 | AT2G27020 | AT2G32730 | AT3G05530 | AT3G11270 | AT3G13330 | AT3G14290 | AT3G22110 | AT3G22630 | AT3G26340 | AT3G27430 | AT3G51260 |
|                                             |                                 | AT3G53970 | AT3G60820 | AT4G14800 | AT4G19006 | AT4G24820 | AT4G28470 | AT4G29040 | AT4G31300 | AT4G38630 | AT5G05780 | AT5G09900 |
|                                             | AT5G19990                       | AT5G20000 | AT5G23540 | AT5G35590 | AT5G38650 | AT5G40580 | AT5G42040 | AT5G42790 | AT5G43010 | AT5G45010 | AT5G45620 |           |
|                                             | AT5G58290                       | AT5G64760 | AT5G66140 |           |           |           |           |           |           |           |           |           |
| Glutathione metabolism                      | AT1G02920                       | AT1G02930 | AT1G02940 | AT1G02950 | AT1G07890 | AT1G09420 | AT1G10360 | AT1G10370 | AT1G17170 | AT1G17180 | AT1G17190 |           |
|                                             | AT1G23820                       | AT1G24280 | AT1G27130 | AT1G27140 | AT1G49860 | AT1G53680 | AT1G54340 | AT1G59670 | AT1G59700 | AT1G63460 | AT1G63770 |           |
|                                             | AT1G64190                       | AT1G65820 | AT1G65930 | AT1G69820 | AT1G69920 | AT1G69930 | AT1G70310 | AT1G74590 | AT1G77490 | AT1G78320 | AT1G78340 |           |
|                                             | AT1G78360                       | AT1G78370 | AT1G78380 | AT2G02930 | AT2G21790 | AT2G24200 | AT2G25080 | AT2G29420 | AT2G29440 | AT2G29450 | AT2G29460 |           |
|                                             | AT2G29470                       | AT2G29480 | AT2G29490 | AT2G30860 | AT2G30870 | AT2G31570 | AT2G43350 | AT2G47730 | AT2G48150 | AT3G02360 | AT3G03190 |           |
|                                             | AT3G09270                       | AT3G09640 | AT3G23580 | AT3G24170 | AT3G27060 | AT3G27300 | AT3G43800 | AT3G54660 | AT3G55040 | AT3G62760 | AT3G63080 |           |
|                                             | AT4G02520                       | AT4G08390 | AT4G09010 | AT4G11600 | AT4G23100 | AT4G29210 | AT4G30910 | AT4G31070 | AT4G31870 | AT4G32320 | AT4G35000 |           |
|                                             | AT4G35970                       | AT4G39640 | AT4G39650 | AT5G02780 | AT5G02790 | AT5G13110 | AT5G14590 | AT5G17220 | AT5G27380 | AT5G35790 | AT5G37830 |           |
|                                             | AT5G40760                       | AT5G41210 | AT5G41670 | AT5G53120 | AT5G62480 |           |           |           |           |           |           |           |
|                                             | Protein export                  | AT1G06870 | AT1G09080 | AT1G15310 | AT1G21650 | AT1G23465 | AT1G24490 | AT1G29310 | AT1G29960 | AT1G48160 | AT1G48900 | AT1G52600 |
|                                             |                                 | AT1G53530 | AT1G67650 | AT1G67680 | AT1G78720 | AT1G79940 | AT2G01110 | AT2G18710 | AT2G18770 | AT2G22425 | AT2G28800 | AT2G30440 |
| AT2G34250                                   |                                 | AT2G39960 | AT2G43640 | AT2G45070 | AT2G45770 | AT2G46470 | AT3G08980 | AT3G15710 | AT3G20920 | AT3G24590 | AT3G48570 |           |
| AT3G49100                                   |                                 | AT3G60540 | AT4G01800 | AT4G04200 | AT4G21180 | AT4G24920 | AT4G30600 | AT4G40042 | AT5G03940 | AT5G05670 | AT5G27430 |           |
| AT5G28540                                   |                                 | AT5G28750 | AT5G42020 | AT5G49500 | AT5G50460 | AT5G60460 | AT5G61970 | AT5G62050 | AT5G66970 |           |           |           |
| Phagosome                                   |                                 | AT1G04820 | AT1G08450 | AT1G09210 | AT1G11890 | AT1G12840 | AT1G19910 | AT1G20010 | AT1G20090 | AT1G20260 | AT1G22740 | AT1G29310 |
|                                             | AT1G32270                       | AT1G34260 | AT1G50010 | AT1G51740 | AT1G52280 | AT1G56340 | AT1G60490 | AT1G64200 | AT1G64740 | AT1G71010 | AT1G75630 |           |
|                                             | AT1G75780                       | AT1G75840 | AT1G76030 | AT1G78720 | AT1G78900 | AT2G16510 | AT2G17800 | AT2G18710 | AT2G21410 | AT2G25610 | AT2G28520 |           |
|                                             | AT2G29550                       | AT2G34250 | AT2G44690 | AT2G45070 | AT3G01390 | AT3G08560 | AT3G14270 | AT3G16100 | AT3G18820 | AT3G28710 | AT3G28715 |           |
|                                             | AT3G42050                       | AT3G48040 | AT3G48570 | AT3G51300 | AT3G58730 | AT3G60540 | AT4G02620 | AT4G09720 | AT4G11150 | AT4G14960 | AT4G17730 |           |
|                                             | AT4G20890                       | AT4G23710 | AT4G24920 | AT4G25950 | AT4G26710 | AT4G28950 | AT4G32530 | AT4G33240 | AT4G33240 | AT4G35950 |           |           |
|                                             | AT4G38510                       | AT4G38920 | AT4G39080 | AT5G07340 | AT5G12250 | AT5G16830 | AT5G19770 | AT5G19780 | AT5G23860 | AT5G44340 | AT5G45970 |           |
|                                             | AT5G46860                       | AT5G50460 | AT5G52270 | AT5G55290 | AT5G60460 | AT5G61790 | AT5G62690 | AT5G62700 | AT5G62880 |           |           |           |
|                                             | alpha-Linolenic acid metabolism | AT1G04710 | AT1G06290 | AT1G06310 | AT1G09400 | AT1G13280 | AT1G17420 | AT1G18020 | AT1G19640 | AT1G20510 | AT1G67560 | AT1G72520 |
| AT1G76680                                   |                                 | AT1G76690 | AT1G77120 | AT2G06050 | AT2G06925 | AT2G33150 | AT2G35690 | AT2G44810 | AT3G01420 | AT3G03480 | AT3G06690 |           |
| AT3G06860                                   |                                 | AT3G25760 | AT3G25770 | AT3G25780 | AT3G45140 | AT3G51840 | AT3G57140 | AT4G15440 | AT4G16760 | AT4G29010 | AT5G04040 |           |
| AT5G42650                                   |                                 | AT5G48880 | AT5G65110 |           |           |           |           |           |           |           |           |           |
| Carbon fixation in photosynthetic organisms | AT1G04410                       | AT1G12900 | AT1G13440 | AT1G16300 | AT1G17290 | AT1G23310 | AT1G32060 | AT1G42970 | AT1G43670 | AT1G53240 | AT1G53310 |           |
|                                             | AT1G56190                       | AT1G62800 | AT1G63290 | AT1G67090 | AT1G68750 | AT1G70580 | AT1G71100 | AT1G72330 | AT1G79530 | AT1G79550 | AT1G79750 |           |
|                                             | AT2G01140                       | AT2G01290 | AT2G13560 | AT2G19900 | AT2G21170 | AT2G21330 | AT2G22780 | AT2G30970 | AT2G36460 | AT2G42600 | AT2G45290 |           |
|                                             | AT3G01850                       | AT3G04120 | AT3G04790 | AT3G12780 | AT3G14940 | AT3G15020 | AT3G26650 | AT3G27520 | AT3G29300 | AT3G54050 | AT3G55440 |           |
|                                             | AT3G55800                       | AT3G60750 | AT4G00570 | AT4G15530 | AT4G26520 | AT4G26530 | AT4G37870 | AT4G38970 | AT5G03690 | AT5G09660 | AT5G11520 |           |
|                                             | AT5G11670                       | AT5G19550 | AT5G25880 | AT5G38410 | AT5G38420 | AT5G38430 | AT5G43330 | AT5G44520 | AT5G56720 | AT5G58330 | AT5G61410 |           |
|                                             | AT5G64380                       | AT5G65690 | ArthCp030 |           |           |           |           |           |           |           |           |           |
| Carbon metabolism                           | AT1G01090                       | AT1G04410 | AT1G06550 | AT1G09420 | AT1G09780 | AT1G11860 | AT1G12230 | AT1G12550 | AT1G12900 | AT1G13440 | AT1G13700 |           |
|                                             | AT1G16300                       | AT1G17290 | AT1G17650 | AT1G17745 | AT1G18640 | AT1G20620 | AT1G20630 | AT1G22020 | AT1G22170 | AT1G22430 | AT1G22440 |           |
|                                             | AT1G23310                       | AT1G24180 | AT1G24280 | AT1G30120 | AT1G32060 | AT1G32380 | AT1G32440 | AT1G32480 | AT1G34430 | AT1G36370 | AT1G42970 |           |
|                                             | AT1G43670                       | AT1G47840 | AT1G48030 | AT1G48430 | AT1G50460 | AT1G50480 | AT1G53240 | AT1G53310 | AT1G54220 | AT1G54340 | AT1G55880 |           |
|                                             | AT1G55920                       | AT1G56190 | AT1G59900 | AT1G62800 | AT1G63290 | AT1G64190 | AT1G65930 | AT1G67090 | AT1G68010 | AT1G68750 | AT1G70580 |           |
|                                             | AT1G71100                       | AT1G72330 | AT1G74030 | AT1G78050 | AT1G79530 | AT1G79550 | AT1G79750 | AT1G79780 | AT1G80380 | AT2G01140 | AT2G01290 |           |
|                                             | AT2G05710                       | AT2G13360 | AT2G13560 | AT2G14170 | AT2G16790 | AT2G17130 | AT2G17630 | AT2G17640 | AT2G18450 | AT2G19860 | AT2G19900 |           |
|                                             | AT2G20420                       | AT2G21170 | AT2G21330 | AT2G22480 | AT2G22780 | AT2G24270 | AT2G26080 | AT2G29560 | AT2G30650 | AT2G30660 | AT2G30970 |           |
|                                             | AT2G34590                       | AT2G35390 | AT2G36460 | AT2G36530 | AT2G36580 | AT2G38040 | AT2G41530 | AT2G      |           |           |           |           |

|                                          |           |           |           |           |           |           |           |           |           |           |           |
|------------------------------------------|-----------|-----------|-----------|-----------|-----------|-----------|-----------|-----------|-----------|-----------|-----------|
|                                          | AT3G04940 | AT3G06810 | AT3G08590 | AT3G09810 | AT3G10050 | AT3G12780 | AT3G13110 | AT3G13930 | AT3G14130 | AT3G14150 | AT3G14415 |
|                                          | AT3G14420 | AT3G14940 | AT3G15020 | AT3G16950 | AT3G17240 | AT3G17770 | AT3G19480 | AT3G20040 | AT3G21720 | AT3G22460 | AT3G22960 |
|                                          | AT3G25530 | AT3G25860 | AT3G25960 | AT3G26650 | AT3G27300 | AT3G27380 | AT3G47520 | AT3G49160 | AT3G49360 | AT3G50520 | AT3G52200 |
|                                          | AT3G52930 | AT3G52990 | AT3G54050 | AT3G55410 | AT3G55440 | AT3G55650 | AT3G55800 | AT3G55810 | AT3G58740 | AT3G58750 | AT3G59760 |
|                                          | AT3G59970 | AT3G60100 | AT3G60510 | AT3G60750 | AT3G61440 | AT4G00570 | AT4G13890 | AT4G13930 | AT4G14880 | AT4G15530 | AT4G16155 |
|                                          | AT4G18360 | AT4G22110 | AT4G24620 | AT4G26270 | AT4G26390 | AT4G26520 | AT4G26530 | AT4G26910 | AT4G26970 | AT4G29130 | AT4G29220 |
|                                          | AT4G31810 | AT4G32210 | AT4G32520 | AT4G32840 | AT4G33010 | AT4G34200 | AT4G35090 | AT4G35260 | AT4G35630 | AT4G35640 | AT4G35650 |
|                                          | AT4G35830 | AT4G37550 | AT4G37560 | AT4G37840 | AT4G37870 | AT4G37930 | AT4G38970 | AT5G03290 | AT5G03690 | AT5G03860 | AT5G04120 |
|                                          | AT5G07440 | AT5G08300 | AT5G08570 | AT5G09600 | AT5G09660 | AT5G11520 | AT5G11670 | AT5G13110 | AT5G13420 | AT5G14590 | AT5G14780 |
|                                          | AT5G15530 | AT5G16390 | AT5G18170 | AT5G19550 | AT5G22620 | AT5G23250 | AT5G24400 | AT5G24410 | AT5G24420 | AT5G25880 | AT5G26780 |
|                                          | AT5G28020 | AT5G28030 | AT5G35360 | AT5G35790 | AT5G36700 | AT5G36790 | AT5G36880 | AT5G38410 | AT5G38420 | AT5G38430 | AT5G40650 |
|                                          | AT5G40760 | AT5G41670 | AT5G42250 | AT5G42740 | AT5G43330 | AT5G43940 | AT5G44520 | AT5G47720 | AT5G47760 | AT5G47810 | AT5G48230 |
|                                          | AT5G50850 | AT5G50950 | AT5G52920 | AT5G55070 | AT5G56350 | AT5G56630 | AT5G56720 | AT5G56760 | AT5G56790 | AT5G61410 | AT5G61580 |
|                                          | AT5G63680 | AT5G64380 | AT5G65165 | AT5G65690 | AT5G65750 | AT5G65940 | AT5G66720 | ArthCp030 | ArthCp031 |           |           |
| Biosynthesis of amino acids              | AT1G02500 | AT1G07780 | AT1G08250 | AT1G08630 | AT1G09780 | AT1G09795 | AT1G10060 | AT1G10070 | AT1G11790 | AT1G12230 | AT1G13440 |
|                                          | AT1G14810 | AT1G15710 | AT1G16300 | AT1G17290 | AT1G17745 | AT1G18500 | AT1G18640 | AT1G22020 | AT1G22170 | AT1G22410 | AT1G23310 |
|                                          | AT1G24807 | AT1G24909 | AT1G25083 | AT1G25155 | AT1G25220 | AT1G29410 | AT1G31180 | AT1G31230 | AT1G31860 | AT1G32380 | AT1G32440 |
|                                          | AT1G32480 | AT1G33320 | AT1G36370 | AT1G44820 | AT1G48470 | AT1G48850 | AT1G48860 | AT1G50090 | AT1G50110 | AT1G54100 | AT1G54340 |
|                                          | AT1G55880 | AT1G55920 | AT1G56190 | AT1G58080 | AT1G62800 | AT1G63290 | AT1G65930 | AT1G69370 | AT1G70580 | AT1G71100 | AT1G71920 |
|                                          | AT1G72330 | AT1G72810 | AT1G74030 | AT1G74040 | AT1G75330 | AT1G78050 | AT1G79530 | AT1G79550 | AT1G80560 | AT1G80600 | AT2G01140 |
|                                          | AT2G01290 | AT2G04400 | AT2G05710 | AT2G13810 | AT2G17130 | AT2G17265 | AT2G17630 | AT2G17640 | AT2G19940 | AT2G21170 | AT2G21330 |
|                                          | AT2G21940 | AT2G22250 | AT2G22480 | AT2G22910 | AT2G24850 | AT2G27820 | AT2G29560 | AT2G29690 | AT2G30970 | AT2G31100 | AT2G31810 |
|                                          | AT2G35390 | AT2G36230 | AT2G36460 | AT2G36530 | AT2G36580 | AT2G36880 | AT2G37500 | AT2G39800 | AT2G42790 | AT2G43090 | AT2G43100 |
|                                          | AT2G43750 | AT2G44040 | AT2G44350 | AT2G44530 | AT2G45290 | AT2G45300 | AT2G45440 | AT3G01120 | AT3G01850 | AT3G02020 | AT3G03630 |
|                                          | AT3G03780 | AT3G04050 | AT3G04120 | AT3G04520 | AT3G04790 | AT3G04940 | AT3G06350 | AT3G07630 | AT3G08590 | AT3G09810 | AT3G10050 |
|                                          | AT3G12780 | AT3G13110 | AT3G14390 | AT3G17390 | AT3G17820 | AT3G19480 | AT3G19710 | AT3G22425 | AT3G22460 | AT3G22960 | AT3G23940 |
|                                          | AT3G25960 | AT3G29200 | AT3G44720 | AT3G48560 | AT3G49160 | AT3G49680 | AT3G50520 | AT3G52930 | AT3G52990 | AT3G53580 | AT3G54640 |
|                                          | AT3G55440 | AT3G55610 | AT3G55650 | AT3G55810 | AT3G55870 | AT3G57050 | AT3G57560 | AT3G58610 | AT3G58750 | AT3G58990 | AT3G59760 |
|                                          | AT3G59760 | AT3G59890 | AT3G60100 | AT3G60750 | AT3G60880 | AT3G61440 | AT4G01850 | AT4G02610 | AT4G08870 | AT4G08900 | AT4G13430 |
|                                          | AT4G13890 | AT4G13930 | AT4G14880 | AT4G14910 | AT4G17830 | AT4G19710 | AT4G23590 | AT4G23600 | AT4G24830 | AT4G26270 | AT4G26390 |
|                                          | AT4G26520 | AT4G26530 | AT4G26900 | AT4G26970 | AT4G27070 | AT4G28410 | AT4G28420 | AT4G29220 | AT4G29840 | AT4G31990 | AT4G32520 |
|                                          | AT4G32840 | AT4G33510 | AT4G33680 | AT4G34200 | AT4G35260 | AT4G35630 | AT4G35640 | AT4G35650 | AT4G35830 | AT4G37670 | AT4G37930 |
|                                          | AT4G38220 | AT4G38970 | AT4G39120 | AT4G39540 | AT4G39980 | AT5G03290 | AT5G03690 | AT5G04120 | AT5G05590 | AT5G05730 | AT5G08570 |
|                                          | AT5G10330 | AT5G10870 | AT5G10920 | AT5G11520 | AT5G11880 | AT5G13280 | AT5G13420 | AT5G14060 | AT5G14200 | AT5G14590 | AT5G14800 |
|                                          | AT5G16290 | AT5G16570 | AT5G17920 | AT5G17990 | AT5G19550 | AT5G20980 | AT5G22620 | AT5G22630 | AT5G26780 | AT5G28020 | AT5G28030 |
|                                          | AT5G28237 | AT5G34930 | AT5G35630 | AT5G36160 | AT5G37600 | AT5G38530 | AT5G44520 | AT5G47810 | AT5G48220 | AT5G52920 | AT5G53460 |
|                                          | AT5G53970 | AT5G54810 | AT5G56350 | AT5G56630 | AT5G56760 | AT5G57890 | AT5G61410 | AT5G61580 | AT5G63680 | AT5G63890 | AT5G65770 |
|                                          | AT5G65780 | AT5G66120 |           |           |           |           |           |           |           |           |           |
| Glyoxylate and dicarboxylate metabolism  | AT1G04410 | AT1G11860 | AT1G12550 | AT1G17650 | AT1G20620 | AT1G20630 | AT1G22020 | AT1G23310 | AT1G32470 | AT1G36370 | AT1G48030 |
|                                          | AT1G48470 | AT1G53240 | AT1G67090 | AT1G68010 | AT1G70580 | AT1G79870 | AT1G80380 | AT2G05710 | AT2G21360 | AT2G22780 | AT2G26080 |
|                                          | AT2G35120 | AT2G35370 | AT2G41220 | AT2G42790 | AT2G44350 | AT3G14130 | AT3G14150 | AT3G14415 | AT3G14420 | AT3G15020 | AT3G16950 |
|                                          | AT3G17240 | AT3G17820 | AT3G21720 | AT3G25530 | AT3G47520 | AT3G58740 | AT3G58750 | AT3G60100 | AT4G13890 | AT4G13930 | AT4G16155 |
|                                          | AT4G17360 | AT4G18360 | AT4G26970 | AT4G32520 | AT4G33010 | AT4G35090 | AT4G35830 | AT4G37550 | AT4G37560 | AT4G37930 | AT5G03860 |
|                                          | AT5G04140 | AT5G09660 | AT5G14780 | AT5G16570 | AT5G26780 | AT5G35630 | AT5G36700 | AT5G36790 | AT5G37600 | AT5G38410 | AT5G38420 |
|                                          | AT5G38430 | AT5G43330 | AT5G47435 | AT5G47720 | AT5G47760 | AT5G48230 | AT5G56720 | ArthCp030 |           |           |           |
| Tryptophan metabolism                    | AT1G04180 | AT1G04610 | AT1G20620 | AT1G20630 | AT1G21430 | AT1G23320 | AT1G23800 | AT1G24100 | AT1G44170 | AT1G47600 | AT1G48910 |
|                                          | AT1G51470 | AT1G51490 | AT1G54100 | AT1G70560 | AT1G74100 | AT2G20610 | AT2G22330 | AT2G30770 | AT2G33230 | AT3G43600 | AT3G44300 |
|                                          | AT3G44310 | AT3G44320 | AT3G48000 | AT3G55410 | AT4G13260 | AT4G24670 | AT4G28720 | AT4G31500 | AT4G32540 | AT4G34240 | AT4G34880 |
|                                          | AT4G35090 | AT4G36250 | AT4G39950 | AT5G11320 | AT5G20960 | AT5G25620 | AT5G25980 | AT5G26000 | AT5G43890 | AT5G47720 | AT5G48230 |
|                                          | AT5G48375 | AT5G65750 |           |           |           |           |           |           |           |           |           |
| Pentose phosphate pathway                | AT1G09420 | AT1G12000 | AT1G12230 | AT1G13700 | AT1G17160 | AT1G20950 | AT1G23190 | AT1G24280 | AT1G32380 | AT1G43670 | AT1G63290 |
|                                          | AT1G64190 | AT1G70730 | AT1G71100 | AT1G76550 | AT2G01140 | AT2G01290 | AT2G16790 | AT2G21330 | AT2G22480 | AT2G24270 | AT2G35390 |
|                                          | AT2G36460 | AT2G44530 | AT2G45290 | AT3G01850 | AT3G02360 | AT3G04790 | AT3G27300 | AT3G49360 | AT3G52930 | AT3G54050 | AT3G60750 |
|                                          | AT4G04040 | AT4G24620 | AT4G26270 | AT4G26520 | AT4G26530 | AT4G29220 | AT4G32840 | AT4G38970 | AT5G03690 | AT5G13110 | AT5G13420 |
|                                          | AT5G24400 | AT5G24410 | AT5G24420 | AT5G35790 | AT5G40760 | AT5G41670 | AT5G42740 | AT5G44520 | AT5G47810 | AT5G51820 | AT5G56630 |
|                                          | AT5G61410 | AT5G61580 | AT5G64380 |           |           |           |           |           |           |           |           |
| Photosynthesis                           | AT1G03130 | AT1G03600 | AT1G06680 | AT1G08380 | AT1G10960 | AT1G14150 | AT1G15700 | AT1G20020 | AT1G20340 | AT1G30380 | AT1G30510 |
|                                          | AT1G31330 | AT1G32550 | AT1G44575 | AT1G52230 | AT1G55670 | AT1G60950 | AT1G67740 | AT1G76100 | AT1G79040 | AT2G07707 | AT2G20260 |
|                                          | AT2G27510 | AT2G30570 | AT2G30790 | AT3G01440 | AT3G16140 | AT3G50820 | AT3G55330 | AT4G02770 | AT4G03280 | AT4G04640 | AT4G05180 |
|                                          | AT4G05390 | AT4G09650 | AT4G12800 | AT4G14890 | AT4G21280 | AT4G28660 | AT4G28750 | AT4G32260 | AT5G10000 | AT5G45040 | AT5G64040 |
|                                          | AT5G66190 | AT5G66570 | ArthCp002 | ArthCp005 | ArthCp006 | ArthCp007 | ArthCp008 | ArthCp009 | ArthCp010 | ArthCp015 | ArthCp016 |
|                                          | ArthCp017 | ArthCp018 | ArthCp019 | ArthCp021 | ArthCp022 | ArthCp028 | ArthCp029 | ArthCp032 | ArthCp035 | ArthCp036 | ArthCp037 |
|                                          | ArthCp038 | ArthCp039 | ArthCp041 | ArthCp042 | ArthCp049 | ArthCp050 | ArthCp052 | ArthCp053 | ArthCp054 | ArthCp075 | ArthMp040 |
| Porphyrin and chlorophyll metabolism     | AT1G03475 | AT1G03630 | AT1G04620 | AT1G08520 | AT1G09940 | AT1G19670 | AT1G44318 | AT1G44446 | AT1G58290 | AT1G58300 | AT1G69720 |
|                                          | AT1G69740 | AT1G74470 | AT2G26540 | AT2G26670 | AT2G30390 | AT2G31250 | AT2G40490 | AT2G44520 | AT3G09150 | AT3G14930 | AT3G44880 |
|                                          | AT3G48730 | AT3G51820 | AT3G56940 | AT4G01690 | AT4G03205 | AT4G03240 | AT4G13250 | AT4G16690 | AT4G18480 | AT4G25080 | AT4G27440 |
|                                          | AT4G37000 | AT5G04900 | AT5G08280 | AT5G13630 | AT5G14220 | AT5G18660 | AT5G26030 | AT5G26710 | AT5G43860 | AT5G45930 | AT5G54190 |
|                                          | AT5G56090 | AT5G63290 | AT5G63570 | AT5G64050 |           |           |           |           |           |           |           |
| Glycine, serine and threonine metabolism | AT1G08630 | AT1G09780 | AT1G11860 | AT1G12550 | AT1G14810 | AT1G17745 | AT1G18640 | AT1G22020 | AT1G22170 | AT1G23310 | AT1G31230 |
|                                          | AT1G31670 | AT1G31690 | AT1G31710 | AT1G32470 | AT1G36370 | AT1G48030 | AT1G54100 | AT1G62810 | AT1G68010 | AT1G70580 | AT1G72810 |
|                                          | AT1G74920 | AT1G78050 | AT1G79870 | AT1G80380 | AT2G13360 | AT2G17265 | AT2G17630 | AT2G24580 | AT2G26080 | AT2G35120 | AT2G35370 |
|                                          | AT2G38400 | AT2G42490 | AT3G02020 | AT3G04520 | AT3G08590 | AT3G08860 | AT3G10050 | AT3G16950 | AT3G17240 | AT3G19480 | AT3G43670 |
|                                          | AT3G48170 | AT3G50520 | AT3G54640 | AT4G02610 | AT4G11640 | AT4G12290 | AT4G13890 | AT4G13930 | AT4G14940 | AT4G16155 | AT4G19710 |
|                                          | AT4G27070 | AT4G29840 | AT4G29890 | AT4G32520 | AT4G33010 | AT4G34200 | AT4G35630 | AT4G37930 | AT4G39660 | AT5G04120 | AT5G13280 |
|                                          | AT5G14060 | AT5G22620 | AT5G26780 | AT5G28237 | AT5G38530 | AT5G54810 |           |           |           |           |           |
