# Supplementary material
Source: PubMed Central journal article supplement (PMC5488868)
Supplement: NIHMS863237-supplement-Supp_TableS3.pdf [file NIHMS863237-supplement-Supp_TableS3.pdf]

Table S3. Metabolite peak values and comparison among genotypes. Quantification of peak height for each assayed metabolite was accomplished using MultiQuant. Q values were obtained through t-tests of each metabolite followed correction for multiple testing in R using the FDR method.

| KEGG compound ID | Full Name                                                   | Abbreviation         | Metabolite peak heights |       |       |       |       |       |       |       |       |       |       |       |       |       |       | Comparisons: ceH vs wt |       | Comparisons: ceH/eds vs wt |       | Comparisons: eds vs wt |             |            |              |              |             |             |            |       |
|------------------|-------------------------------------------------------------|----------------------|-------------------------|-------|-------|-------|-------|-------|-------|-------|-------|-------|-------|-------|-------|-------|-------|------------------------|-------|----------------------------|-------|------------------------|-------------|------------|--------------|--------------|-------------|-------------|------------|-------|
|                  |                                                             |                      | P 1                     | P 2   | P 3   | P 4   | P 5   | ceh_1 | ceh_2 | ceh_3 | ceh_4 | ceh_5 | c/e_1 | c/e_2 | c/e_3 | c/e_4 | c/e_5 | eds_1                  | eds_2 | eds_3                      | eds_4 | eds_5                  | log2 FC     | q value    | log2 FC      | q value      | log2 FC     | q value     |            |       |
| C00631           | 2-Phospho-D-glycerate                                       | 2PG                  | 4E+05                   | 5E+05 | 5E+05 | 4E+05 | 5E+05 | 7E+05 | 6E+05 | 6E+05 | 7E+05 | 6E+05 | 5E+05 | 5E+05 | 7E+05 | 7E+05 | 8E+05 | 6E+05                  | 6E+05 | 7E+05                      | 6E+05 | 6E+05                  | 0.49802319  | 6.06E-05   | 0.495977575  | 0.066016865  | 0.40274814  | 0.00263783  |            |       |
| C00197           | 3-Phospho-D-glycerate                                       | 3PG                  | 4E+06                   | 4E+06 | 4E+06 | 4E+06 | 3E+06 | 4E+06 | 4E+06 | 4E+06 | 4E+06 | 4E+06 | 3E+06 | 4E+06 | 4E+06 | 4E+06 | 4E+06 | 4E+06                  | 4E+06 | 5E+06                      | 4E+06 | 4E+06                  | -0.0185478  | 8.9561972  | -0.097121637 | 0.579806359  | 0.1563301   | 0.32451262  |            |       |
| C00445           | 6-Phospho-D-glucanate                                       | 6PG                  | 54935                   | 49002 | 75419 | 77974 | 1E+05 | 1E+05 | 2E+05 | 1E+05 | 1E+05 | 2E+05 | 62030 | 72584 | 63078 | 57651 | 65591 | 46047                  | 59458 | 46216                      | 71193 | 1E+05                  | 0.94688944  | 0.00714882 | -0.271106808 | 0.458793572  | -0.2281532  | 0.66470812  |            |       |
| C00212           | cis-Aconitic acid                                           | CIS-ACONITATE        | 2E+07                   | 2E+07 | 2E+07 | 2E+07 | 2E+07 | 2E+07 | 2E+07 | 2E+07 | 2E+07 | 2E+07 | 2E+07 | 2E+07 | 2E+07 | 2E+07 | 2E+07 | 2E+07                  | 2E+07 | 2E+07                      | 2E+07 | 2E+07                  | 2E+07       | 2E+07      | 2E+07        | 2E+07        | 2E+07       | 2E+07       | 2E+07      |       |
| C03794           | Adenosine                                                   | Adenosine            | 10803                   | 13571 | 14473 | 14670 | 14017 | 23147 | 17120 | 19863 | 14350 | 17955 | 13797 | 23967 | 13924 | 14324 | 18368 | 39093                  | 42933 | 32825                      | 25548 | 32551                  | 0.4528041   | 0.30142999 | 0.321274088  | 0.213809688  | 1.36665758  | 0.08907089  |            |       |
| C00008           | adenylosuccinate                                            | Adenylo-Suc          | 2E+05                   | 3E+05 | 3E+05 | 4E+05 | 5E+05 | 29351 | 18547 | 25380 | 23555 | 22636 | 86450 | 5E+05 | 79487 | 68824 | 2E+05 | 3E+05                  | 4E+05 | 5E+05                      | 5E+05 | 5E+05                  | -3.9180187  | 0.00297596 | -1.83523471  | 0.008784919  | 0.11303141  | 0.06649711  |            |       |
| C00026           | 2-Ketoglutaric acid                                         | 2-KETOGLUTARATE      | 2E+06                   | 2E+06 | 2E+06 | 2E+06 | 2E+06 | 1E+06 | 1E+06 | 1E+06 | 1E+06 | 1E+06 | 2E+06 | 2E+06 | 2E+06 | 2E+06 | 2E+06 | 2E+06                  | 2E+06 | 2E+06                      | 2E+06 | 2E+06                  | 2E+06       | 2E+06      | 2E+06        | 2E+06        | 2E+06       | 2E+06       | 2E+06      |       |
| C00041           | L-Alanine                                                   | ALA                  | 1889                    | 2546  | 2131  | 3420  | 2008  | 5860  | 4376  | 5798  | 5088  | 4857  | 2888  | 4129  | 2541  | 2959  | 3373  | 2424                   | 1953  | 2232                       | 3019  | 2486                   | 1.11502877  | 0.0002295  | 0.405831627  | 0.109536375  | 0.01458113  | 0.92525426  |            |       |
| C00020           | Adenosine 5'-monophosphate                                  | AMP                  | 8E+05                   | 1E+06 | 8E+05 | 9E+05 | 9E+05 | 8E+05 | 8E+05 | 8E+05 | 8E+05 | 9E+05 | 5E+05 | 6E+05 | 6E+05 | 5E+05 | 6E+05 | 5E+05                  | 6E+05 | 1E+06                      | 1E+06 | 1E+06                  | 9E+05       | 9E+05      | 9E+05        | 9E+05        | 9E+05       | 9E+05       | 9E+05      |       |
| C00062           | L-Arginine                                                  | ARG                  | 3E+05                   | 2E+05 | 3E+05 | 3E+05 | 4E+05 | 7E+05 | 6E+05 | 7E+05 | 7E+05 | 9E+05 | 1E+06 | 1E+06 | 1E+06 | 1E+06 | 1E+06 | 2E+06                  | 4E+05 | 3E+05                      | 4E+05 | 4E+05                  | 2E+06       | 1.2534748  | 0.0002295    | 2.21133433   | 7.62E-05    | 0.37508875  | 0.10299663 |       |
| C03406           | N-(L-Arginino)succinate                                     | L-ARGININO-SUCCINATE | 2E+06                   | 1E+06 | 2E+06                  | 2E+06 | 2E+06                      | 2E+06 | 2E+06                  | 2E+06       | 2E+06      | 2E+06        | 2E+06        | 2E+06       | 2E+06       | 2E+06      | 2E+06 |
| C00152           | L-Asparagine                                                | ASN                  | 7830                    | 14016 | 12167 | 14732 | 9895  | 30016 | 24241 | 23544 | 26616 | 25694 | 12435 | 10969 | 16012 | 19282 | 16668 | 13997                  | 10262 | 13502                      | 13573 | 14526                  | 1.14980967  | 8.49E-05   | 0.362051745  | 0.167659964  | 0.16752796  | 0.504861    |            |       |
| C00049           | L-Aspartate                                                 | ASP                  | 6E+07                   | 6E+07 | 6E+07 | 6E+07 | 6E+07 | 1E+08 | 1E+08 | 1E+08 | 1E+08 | 1E+08 | 6E+07 | 7E+07 | 7E+07 | 7E+07 | 7E+07 | 7E+07                  | 7E+07 | 7E+07                      | 7E+07 | 7E+07                  | 7E+07       | 7E+07      | 7E+07        | 7E+07        | 7E+07       | 7E+07       | 7E+07      | 7E+07 |
| C00002           | Adenosine 5'-triphosphate                                   | ATP                  | 6E+06                   | 6E+06 | 7E+06 | 5E+06 | 6E+06 | 1E+07 | 1E+07 | 1E+07 | 1E+07 | 1E+07 | 1E+07 | 7E+06 | 7E+06 | 7E+06 | 6E+06 | 6E+06                  | 5E+06 | 5E+06                      | 5E+06 | 6E+06                  | 6E+06       | 0.77750771 | 2.85E-06     | 0.139322235  | 0.060057513 | -0.11500434 | 0.22726641 |       |
| C00438           | N-Carbamoyl-L-aspartate                                     | CARBAMYL-L-ASPARTATE | 1E+05                   | 1E+05 | 1E+05 | 1E+05 | 1E+05 | 1E+05 | 1E+05 | 1E+05 | 1E+05 | 1E+05 | 1E+05 | 95480 | 87928 | 88344 | 83405 | 1E+05                  | 1E+05 | 1E+05                      | 1E+05 | 1E+05                  | 1E+05       | -0.0097924 | 0.91213681   | -0.554461637 | 0.000456885 | -0.04017903 | 0.67977823 |       |
| C00575           | 3',5'-Cyclic AMP                                            | cAMP                 | 18955                   | 16951 | 16449 | 13303 | 11492 | 640.8 | 453.2 | 833.1 | 703.9 | 818.7 | 11790 | 11380 | 10163 | 7371  | 6848  | 27068                  | 21160 | 24075                      | 15202 | 15205                  | 4.4831331   | 0.00063464 | -0.698197819 | 0.007374344  | 0.41282655  | 0.19676040  |            |       |
| C00112           | Cytidine 5'-diphosphate                                     | CDP                  | 2E+05                   | 2E+05 | 2E+05 | 1E+05 | 2E+05 | 1E+05 | 1E+05 | 1E+05 | 1E+05 | 1E+05 | 2E+05 | 2E+05 | 2E+05 | 2E+05 | 2E+05 | 2E+05                  | 2E+05 | 2E+05                      | 2E+05 | 2E+05                  | 2E+05       | -0.2491318 | 0.06532263   | 0.241194457  | 0.050498982 | 0.27746562  | 0.07449442 |       |
| C11435           | 4-(Cytidine 5'-diphospho)-2-C-methyl-D-erythritol           | CDP-ME               | 35743                   | 23428 | 20852 | 17907 | 21737 | 1E+05 | 1E+05 | 1E+05 | 1E+05 | 1E+05 | 35242 | 34660 | 49229 | 46300 | 58877 | 18122                  | 18037 | 25718                      | 19608 | 21990                  | 2.33014704  | 1.84E-06   | 0.842771334  | 0.017258266  | -0.27344291 | 0.31641044  |            |       |
| C11436           | 2-Phospho-4-(cytidine 5'-diphospho)-2-C-methyl-D-erythritol | CDP-ME-2P            | 4580                    | 3518  | 4708  | 1967  | 4170  | 17807 | 15612 | 17356 | 14390 | 19064 | 16777 | 15975 | 14246 | 20640 | 19073 | 3236                   | 3123  | 4261                       | 4209  | 4524                   | 2.15262029  | 1.51E-05   | 0.219560011  | 0.000278665  | -0.06480673 | 0.82065419  |            |       |
| C00942           | 3',5'-Cyclic GMP                                            | cgMP                 | 4E+05                   | 3E+05 | 4E+05 | 3E+05 | 3E+05 | 19454 | 19234 | 14633 | 19480 | 12316 | 2E+05 | 3E+05 | 2E+05 | 2E+05 | 2E+05 | 5E+05                  | 5E+05 | 4E+05                      | 4E+05 | 4E+05                  | 4E+05       | 4E+05      | 4E+05        | 4E+05        | 4E+05       | 4E+05       | 4E+05      | 4E+05 |
| C00158           | Citrate                                                     | CIT                  | 4E+08                   | 4E+08 | 4E+08 | 4E+08 | 4E+08 | 4E+08 | 4E+08 | 4E+08 | 4E+08 | 4E+08 | 3E+08 | 3E+08 | 3E+08 | 3E+08 | 3E+08 | 3E+08                  | 4E+08 | 4E+08                      | 4E+08 | 4E+08                  | 4E+08       | 0.05143298 | 0.03593867   | -0.319138181 | 3.46E-05    | -0.01448457 | 0.10232264 |       |
| C00327           | L-Citrulline                                                | CITRUL               | 4E+05                   | 4E+05 | 4E+05 | 4E+05 | 3E+05 | 6E+05 | 6E+05 | 6E+05 | 6E+05 | 7E+05 | 3E+05 | 3E+05 | 4E+05 | 4E+05 | 4E+05 | 4E+05                  | 5E+05 | 5E+05                      | 4E+05 | 4E+05                  | 0.7666203   | 2.72E-06   | 0.02555581   | 0.767914714  | 0.2719819   | 0.0037335   |            |       |
| C00055           | Cytidine 5'-monophosphate                                   | CTMP                 | 1E+05                   | 1E+05 | 1E+05 | 1E+05 | 1E+05 | 81284 | 70739 | 78126 | 80863 | 78849 | 52127 | 58789 | 76055 | 59304 | 62999 | 1E+05                  | 1E+05 | 1E+05                      | 1E+05 | 1E+05                  | 1E+05       | -0.4871091 | 0.00055177   | -0.802070761 | 0.000237997 | 0.33338471  | 0.00525963 |       |
| C00063           | Cytidine 5'-triphosphate                                    | CTP                  | 8E+05                   | 7E+05 | 8E+05 | 8E+05 | 1E+06 | 8E+05                  | 7E+05 | 7E+05                      | 7E+05 | 8E+05                  | 0.83078415  | 0.0015035  | 0.402646377  | 0.00158083   | -0.01483501 | 0.80510311  |            |       |
| C00475           | Cytidine                                                    | CYT                  | 4929                    | 4501  | 5590  | 4929  | 4739  | 3162  | 2109  | 2634  | 2865  | 2994  | 3844  | 3480  | 4054  | 4329  | 6855  | 5438                   | 5051  | 5352                       | 5352  | 5352                   | -0.8429146  | 6.99E-05   | -0.420694619 | 0.01021238   | 0.24450931  | 0.14013409  |            |       |
| C00111           | dihydroxyacetone phosphate                                  | DHAP                 | 4E+05                   | 3E+05 | 4E+05 | 2E+05 | 3E+05 | 1E+06 | 1E+06 | 1E+06 | 1E+06 | 1E+06 | 7E+05 | 7E+05 | 6E+05 | 7E+05 | 7E+05 | 2E+05                  | 2E+05 | 2E+05                      | 2E+05 | 2E+05                  | 1.84060897  | 6.74E-07   | 1.08512109   | 0.00191741   | -0.49086538 | 0.10352968  |            |       |
| C00235           | Dimethylallyl diphosphate                                   | DMAPP                | 55207                   | 48173 | 52796 | 52623 | 57080 | 65932 | 62943 | 72022 | 61823 | 66854 | 47461 | 45588 | 45731 | 37468 | 44609 | 49447                  | 55459 | 54411                      | 50375 | 48954                  | 0.30984889  | 0.0010595  | -0.26742918  | 0.010271673  | -0.03977014 | 0.16235264  |            |       |
| C00363           | Deoxythymidyl diphosphate                                   | dTMP                 | 6306                    | 10242 | 6673  | 4916  | 7007  | 9815  | 5734  | 7043  | 12867 | 7723  | 20835 | 20716 | 17278 | 19524 | 14547 | 9292                   | 6139  | 7960                       | 8392  | 8274                   | 0.29712666  | 0.36584321 | 1.402366801  | 0.000365611  | 0.18877699  | 0.504861    |            |       |
| C00459           | Thymidine 5'-diphosphate                                    | dTDP                 | 22216                   | 22880 | 20668 | 13780 | 19953 | 22013 | 21584 | 21563 | 21372 | 15605 | 20730 | 22535 | 27542 | 20670 | 21019 | 23588                  | 23165 | 29750                      | 22898 | 24293                  | 0.03719944  | 0.83384997 | 0.177154688  | 0.00156417   | 0.31406628  | 0.11092374  |            |       |
| C00364           | Thymidine 5'-phosphate                                      | dTMP                 | 3568                    | 3654  | 2963  | 3955  | 4925  | 3424  | 5766  | 5287  | 5286  | 4903  | 3017  | 4910  | 5490  | 4381  | 2997  | 3391                   | 1952  | 3753                       | 3578  | 1743                   | 0.37151985  | 0.0712591  | 1.2532401    | 0.616806483  | 0.01455338  | 0.21499338  |            |       |
| C00459           | Thymidine triphosphate                                      | dTTP                 | 67364                   | 66250 | 66783 | 59970 | 68586 | 1E+05 | 1E+05 | 1E+05 | 2E+05 | 2E+05 | 2E+05 | 88408 | 93448 | 91876 | 93429 | 62087                  | 73863 | 68051                      | 63601 | 65820                  | 5.94982573  | 0.00536747 | -0.076257203 | 0.414463195  | -0.10688674 | 0.26277004  |            |       |
| C11437           | 1-Deoxy-D-xylulose 5-phosphate                              | DXP                  | 60139                   | 56407 | 55272 | 47115 | 56788 | 92338 | 76591 | 69979 | 92360 | 72365 | 52238 | 48722 | 59476 | 51336 | 49751 | 51178                  | 55751 | 51854                      | 48890 | 48361                  | 5.94982573  | 0.00536747 | -0.076257203 | 0.414463195  | -0.10688674 | 0.26277004  |            |       |
| C00279           | D-Erythrose 4-phosphate                                     | E4P                  | 6E+05                   | 6E+05 | 6E+05 | 6E+05 | 1E+06 | 1E+06 | 1E+06 | 1E+06 | 1E+06 | 7E+05 | 7E+05 | 8E+05 | 8E+05 | 8E+05 | 8E+05 | 8E+05                  | 6E+05 | 6E+05                      | 6E+05 | 6E+05                  | 1.191070257 | 4.16E-07   | 0.362352825  | 0.000456885  | -0.12137384 | 0.32330719  |            |       |
| C00186           | Flavin adenine dinucleotide                                 | FAD                  | 75401                   | 89562 | 92190 | 85206 | 85891 | 1E+05 | 89212 | 1E+05 | 1E+05 | 91283 | 96645 | 1E+05 | 1E+05 | 92842 | 97723 | 96048                  | 1E+05 | 1E+05                      | 96325 |                        |             |            |              |              |             |             |            |       |
