# Supplementary material
Source: PubMed Central journal article supplement (PMC5488868)
Supplement: NIHMS863237-supplement-Supp_TableS4.pdf [file NIHMS863237-supplement-Supp_TableS4.pdf]

|           |           |          |          |          |          |          |          |          |          |          |          |          |          |          |          |           |           |          |          |    |
|-----------|-----------|----------|----------|----------|----------|----------|----------|----------|----------|----------|----------|----------|----------|----------|----------|-----------|-----------|----------|----------|----|
| AT1G01920 | AT1G01920 | 121.2682 | 158.7979 | 114.6012 | 134.8599 | 132.4935 | 107.6588 | 128.0597 | 125.1512 | 107.3871 | 116.1038 | 111.7481 | 132.596  | -0.04554 | 0.86157  | -0.11186  | 0.670578  | -0.11001 | 0.80346  |    |
| AT1G01930 | AT1G01930 | 131.9683 | 114.1917 | 113.3136 | 144.7579 | 109.666  | 135.7073 | 121.8364 | 156.439  | 132.6695 | 115.1443 | 97.11438 | 172.3088 | 0.114098 | 0.644926 | 0.180038  | 0.474411  | -0.09064 | 0.850189 |    |
| AT1G01940 | CYP18-1   | 54.68958 | 71.36984 | 86.27284 | 141.871  | 118.5816 | 100.6809 | 69.35667 | 102.4945 | 99.57709 | 84.43914 | 81.15037 | 172.6939 | 0.752656 | 0.002214 | 0.752656  | 0.247536  | 0.190649 | 0.711805 |    |
| AT1G01950 | ARK2      | 209.2471 | 221.2465 | 207.3123 | 192.1857 | 198.7402 | 218.3081 | 184.9751 | 202.8313 | 108.3633 | 258.1151 | 288.6825 | 229.9712 | -0.06595 | 0.811797 | -0.35068  | 0.147021  | 0.275531 | 0.459606 |    |
| AT1G01960 | BIG3      | 1110.346 | 706.5614 | 687.6074 | 402.5176 | 372.3066 | 501.4109 | 490.0062 | 572.8906 | 352.4248 | 574.6718 | 586.6773 | 541.7791 | -0.94487 | 0.000013 | -0.79853  | 0.000352  | -0.5401  | 0.088423 |    |
| AT1G01970 | AT1G01970 | 254.2934 | 363.9862 | 400.4605 | 295.2896 | 317.3218 | 284.0996 | 400.1866 | 393.7948 | 498.8261 | 379.6756 | 276.7095 | 395.7163 | -0.31262 | 0.078065 | 0.204787  | 0.295746  | -0.13795 | 0.68156  |    |
| AT1G01980 | AT1G01980 | 0        | 0        | 0        | 0        | 0        | 0        | 0        | 0        | 0.995936 | 0        | 0        | 0        | 0        | NA       | 0         | NA        | 0        | 171512   | NA |
| AT1G01990 | AT1G01990 | 167.6355 | 210.541  | 180.2716 | 152.1813 | 147.7302 | 144.5419 | 138.7313 | 166.1491 | 189.3917 | 126.6587 | 158.3097 | 177.14   | -0.31117 | 0.127016 | -0.16565  | 0.485297  | -0.26131 | 0.439946 |    |
| AT1G02000 | GAE2      | 86.78999 | 73.15409 | 65.67037 | 44.54088 | 52.99738 | 47.84836 | 56.91542 | 52.86561 | 64.43224 | 68.12703 | 55.87403 | 65.26211 | -0.62123 | 0.009635 | -0.36148  | 0.186716  | -0.24037 | 0.595343 |    |
| AT1G02010 | SEC1A     | 101.0568 | 103.4863 | 118.4642 | 99.3215  | 94.07035 | 84.73147 | 119.1667 | 106.8101 | 66.38473 | 93.07476 | 101.1054 | 92.19568 | -0.2014  | 0.45054  | -0.13825  | 0.647009  | -0.17125 | 0.719111 |    |
| AT1G02020 | AT1G02020 | 171.2022 | 135.6027 | 121.0395 | 76.7093  | 78.83361 | 87.72199 | 90.70896 | 108.9679 | 91.76712 | 108.4275 | 131.7031 | 98.41112 | -0.80555 | 7.05E-05 | -0.54614  | 0.102857  | -0.34101 | 0.316182 |    |
| AT1G02030 | ZAT1      | 2.377808 | 0        | 0        | 2.474493 | 0        | 1.993682 | 1.778607 | 3.23667  | 2.928738 | 0        | 1.330334 | 0        | 0.256727 | 0.734487 | 0.616208  | 0.38431   | -0.24006 | NA       |    |
| AT1G02040 | AT1G02040 | 2.377808 | 1.784246 | 0        | 0        | 1.987402 | 0.996841 | 0.889303 | 2.15778  | 0.976246 | 0.959536 | 0        | 0        | -0.17482 | 0.817475 | -0.0022   | 0.998029  | -0.4597  | NA       |    |
| AT1G02050 | PKSA      | 66.57862 | 60.66437 | 77.25926 | 44.12847 | 37.76063 | 49.84204 | 34.68284 | 63.65451 | 38.07359 | 45.09817 | 46.56169 | 56.97486 | -0.61616 | 0.030436 | -0.57043  | 0.06283   | -0.44007 | 0.344272 |    |
| AT1G02060 | AT1G02060 | 89.1678  | 87.42806 | 78.54691 | 39.5919  | 28.48609 | 44.85784 | 76.4801  | 63.65451 | 36.1211  | 72.92471 | 57.20436 | 79.7648  | -0.11693 | 7.08E-05 | -0.50017  | 0.115151  | -0.258   | 0.636026 |    |
| AT1G02065 | SPL8      | 28.53369 | 46.3904  | 25.75309 | 25.56977 | 22.52389 | 18.93997 | 15.11816 | 11.86779 | 21.47741 | 32.62421 | 47.89202 | 22.78994 | -0.48495 | 0.224477 | -0.90857  | 0.024804  | 0.04719  | 0.962194 |    |
| AT1G02070 | AT1G02070 | 7.133424 | 1.784246 | 2.575309 | 2.474493 | 1.987402 | 1.993682 | 2.66791  | 0        | 2.928738 | 7.676285 | 2.660668 | 6.215439 | -0.52458 | 0.462785 | -0.58806  | 0.430641  | 0.348517 | NA       |    |
| AT1G02074 | AT1G02074 | 0        | 0        | 0        | 0.412416 | 0        | 0.996841 | 0        | 0        | 0        | 0        | 0        | 0        | 0.224618 | NA       | 0         | NA        | 0        | NA       |    |
| AT1G02080 | AT1G02080 | 1810.701 | 1447.024 | 1236.148 | 753.4833 | 690.9534 | 1058.645 | 1076.057 | 1289.273 | 532.0541 | 1169.674 | 1206.613 | 1066.984 | -0.80403 | 0.000297 | -0.60241  | 0.036299  | -0.36564 | 0.431857 |    |
| AT1G02090 | CSN7      | 180.7134 | 173.0719 | 213.7506 | 336.1187 | 292.1481 | 274.1312 | 198.3147 | 188.8057 | 297.755  | 191.9071 | 135.6941 | 217.5404 | 0.647883 | 0.004026 | 0.259202  | 0.334254  | -0.05291 | 0.927347 |    |
| AT1G02100 | AT1G02100 | 345.971  | 437.1403 | 330.9272 | 370.3492 | 392.1806 | 377.8027 | 397.5187 | 391.637  | 443.2157 | 299.3751 | 291.3431 | 314.9156 | 0.041875 | 0.822826 | 0.153155  | 0.371439  | -0.2843  | 0.208946 |    |
| AT1G02110 | AT1G02110 | 233.0252 | 187.3458 | 191.8605 | 124.9616 | 92.08295 | 106.662  | 96.04478 | 93.86342 | 121.0545 | 141.0517 | 172.9434 | 159.5296 | -0.89213 | 0.106746 | -0.95561  | 0.174106  | -0.37081 | 0.292699 |    |
| AT1G02120 | VAD1      | 878.6    | 901.0442 | 831.8247 | 1026.502 | 912.2174 | 1085.56  | 808.3769 | 979.6321 | 924.505  | 753.2355 | 613.284  | 671.2674 | 0.209223 | 0.147798 | 0.054045  | 0.768877  | -0.35035 | 0.063833 |    |
| AT1G02130 | RABD2A    | 505.2842 | 517.4313 | 484.158  | 531.6037 | 531.2988 | 493.4362 | 489.1169 | 457.4493 | 428.572  | 563.2474 | 573.3739 | 437.1526 | 0.048995 | 0.787108 | -0.12866  | 0.459408  | 0.061291 | 0.851171 |    |
| AT1G02136 | AT1G02136 | 0        | 0        | 0        | 0.662467 | 0        | 0        | 0        | 0        | 0.972646 | 0        | 0        | 0        | 0.097788 | NA       | 0.140077  | NA        | 0        | NA       |    |
| AT1G02140 | MEEF63    | 687.1865 | 690.5032 | 788.0445 | 1059.908 | 1113.607 | 805.4473 | 855.5099 | 681.8584 | 1429.224 | 801.2122 | 819.4857 | 855.6588 | 0.443807 | 0.07184  | 0.437118  | 0.088245  | 0.185741 | 0.689144 |    |
| AT1G02145 | ALG12     | 255.6143 | 180.2088 | 251.0926 | 162.4917 | 186.1533 | 206.346  | 252.5622 | 225.488  | 196.2254 | 255.2365 | 208.8624 | 234.1149 | -0.31982 | 0.110082 | -0.03526  | 0.895748  | 0.016366 | 0.976392 |    |
| AT1G02150 | AT1G02150 | 1027.213 | 986.6881 | 925.8235 | 638.8317 | 659.1549 | 585.1455 | 678.5386 | 837.2186 | 978.1985 | 840.5532 | 827.4677 | 948.8904 | -0.6315  | 1.66E-05 | -0.23442  | 0.16915   | -0.16482 | 0.552398 |    |
| AT1G02160 | AT1G02160 | 108.1903 | 142.7397 | 157.0938 | 227.241  | 251.7376 | 165.4576 | 217.8974 | 128.3879 | 306.5142 | 163.1211 | 182.2558 | 172.9964 | 0.630776 | 0.027958 | 0.6458    | 0.029341  | 0.327102 | 0.519619 |    |
| AT1G02170 | AMC1      | 187.8468 | 187.3458 | 199.5864 | 274.6688 | 247.1003 | 250.207  | 208.9863 | 237.3558 | 216.7266 | 168.8783 | 170.2827 | 142.9551 | 0.42265  | 0.006425 | 0.199598  | 0.273775  | -0.25272 | 0.348406 |    |
| AT1G02180 | AT1G02180 | 70.14533 | 48.17464 | 73.3963  | 44.9533  | 45.04777 | 25.91786 | 35.57214 | 38.84004 | 30.26363 | 121.861  | 91.79304 | 70.4164  | -0.66781 | 0.02964  | -0.83014  | 0.00948   | 0.528475 | 0.248787 |    |
| AT1G02190 | AT1G02190 | 22.58917 | 12.48792 | 12.87654 | 17.32145 | 15.23675 | 12.95889 | 15.11046 | 6.83722  | 28.78607 | 13.30334 | 17.61041 | 0        | -0.06721 | 0.905862 | -0.33842  | 0.534301  | 0.274083 | NA       |    |
| AT1G02205 | CER1      | 1748.878 | 1527.315 | 1491.104 | 673.4746 | 570.3843 | 628.0097 | 457.9913 | 494.1316 | 357.306  | 1652.32  | 1356.941 | 1559.039 | -1.3278  | 5.42E-21 | -1.8357   | 3.9E-38   | -0.0602  | 0.867473 |    |
| AT1G02210 | AT1G02210 | 0        | 0        | 0        | 0        | 0        | 0        | 0        | 0        | 0        | 1.330334 | 0        | 0        | 0        | NA       | 0         | NA        | 0        | 172362   | NA |
| AT1G02220 | NAC003    | 41.61164 | 49.95889 | 52.79383 | 280.0302 | 343.8205 | 262.1691 | 312.1455 | 224.4091 | 146.4369 | 50.85539 | 45.23135 | 39.36445 | 2.482844 | 1.6E-21  | 2.121084  | 1.19E-15  | -0.08559 | 0.908715 |    |
| AT1G02228 | AT1G02228 | 0        | 0        | 0        | 0        | 0        | 0        | 0        | 0        | 0        | 0        | 0        | 0        | #N/A     | #N/A     | #N/A      | #N/A      | #N/A     | #N/A     |    |
| AT1G02230 | NAC004    | 13.07794 | 19.62671 | 15.45185 | 104.7536 | 106.6572 | 87.72199 | 24.9005  | 21.5778  | 23.4299  | 2.878607 | 3.991002 | 10.35907 | 2.521656 | 7.42E-16 | 0.505574  | 0.229347  | -1.13727 | 0.054926 |    |
| AT1G02250 | NAC005    | 0        | 1.784246 | 1.287654 | 3.71174  | 5.962205 | 4.984204 | 4.446517 | 4.31556  | 2.928738 | 0.959536 | 1.330334 | 1.035907 | 1.20125  | 0.060578 | 0.948781  | 0.17247   | 0.01159  | NA       |    |
| AT1G02260 | AT1G02260 | 261.5589 | 281.9109 | 242.079  | 315.0855 | 306.7223 | 311.0143 | 346.8284 | 331.2192 | 199.1542 | 252.3579 | 256.7545 | 258.9760 | 0.244536 | 0.263979 | 0.157851  | 0.522254  | -0.02919 | 0.957294 |    |
| AT1G02270 | AT1G02270 | 311.4928 | 406.8081 | 294.8728 | 350.5532 | 385.556  | 318.989  | 461.5485 | 359.2703 | 432.477  | 50.2305  | 416.3945 | 315.9515 | 0.066557 | 0.773767 | 0.309172  | 0.120842  | 0.097585 | 0.804253 |    |
| AT1G02280 | TOC33     | 958.2566 | 785.0683 | 1032.699 | 766.6806 | 876.4442 | 845.321  | 945.3296 | 890.0842 | 1268.144 | 1099.628 | 943.2068 | 1216.154 | -0.15761 | 0.44078  | -0.155696 | 0.468812  | -0.25553 | 0.648881 |    |
| AT1G02290 | AT1G02290 | 68.95643 | 98.13353 | 97.86173 | 75.88447 | 81.48347 | 83.73463 | 82.70522 | 78.75897 | 89.81463 | 100.7512 | 83.81104 | 75.62118 | -0.12615 | 0.639874 | -0.06081  | 0.847412  | -0.00906 | 0.989371 |    |
| AT1G02300 | AT1G02300 | 347.16   | 479.9622 | 392.7346 | 563.597  | 602.8452 | 475.9341 | 562.0398 | 476.8694 | 466.6456 | 450.0222 | 412.4035 | 414.3626 | 0.43129  | 0.008534 | 0.306828  | 0.086628  | -0.07258 | 0.849611 |    |
| AT1G02305 | AT1G02305 | 883.3556 | 949.2189 | 878.1803 | 1114.759 | 1065.247 | 910.1156 | 1060.939 | 1077.811 | 1241.785 | 869.3393 | 826.1374 | 834.9407 | 0.191673 | 0.155217 | 0.316772  | 0.105167  | -0.09633 | 0.703509 |    |
| AT1G02310 | MAN1      | 1.188904 | 0        | 0        | 3.862963 | 19.79595 | 18.54908 | 21.9305  | 19.56468 | 19.42002 | 13.66744 | 1.919071 | 0        | 2.460663 | 1.64E-06 | 2.654441  | 1.83E-05  | -0.48946 | NA       |    |
| AT1G02320 | AT1G02320 | 0        | 0        | 0        | 0        | 0        | 0.996841 | 1.778607 | 0        | 0        | 0        | 0        | 0        | 0.124069 | NA       | 0.253321  | NA        | 0        | NA       |    |
| AT1G02330 | AT1G02330 | 237.7808 | 233.7362 | 235.6407 | 364.5754 | 324.609  | 331.948  | 261.4552 | 269.7225 | 327.0424 | 308.0109 | 258.0848 | 239.2944 | 0.523469 | 0.00098  | 0.2733    | 0.133287  | 0.186106 | 0.535278 |    |
| AT1G02335 | GL22      | 34.47821 | 42.8219  | 45.0679  | 43.71605 | 27.82363 | 40.80747 | 18.67537 | 22.65669 | 40.02609 | 47.97678 | 43.90102 | 54.90305 | -0.10305 | 0.805884 | -0.53803  | 0.154819  | 0.255621 | 0.691846 |    |
| AT1G02340 | HFR1      | 72.52314 | 69.5856  | 63.09506 | 28.04426 | 35.11077 | 39.87363 | 28.45771 | 26.97225 | 24.40615 | 30.70514 | 31.92802 | 46.61579 | -0.97161 | 0.000317 | -1.28182  | 0.741E-06 | -0.85737 | 0.021276 |    |
| AT1G02350 | AT1G02350 | 29.7226  | 39.25341 | 38.3284  | 15.25938 | 20.53649 | 24.92102 | 12.45025 | 6.47334  | 30.26363 | 26.867   | 27.93701 | 30.04129 | -0.61615 | 0.150655 | -0.84106  | 0.058503  | -0.16107 | 0.862644 |    |
| AT1G02360 | AT1G02360 | 20.1137  | 33.90067 | 16.73951 | 45.36571 | 52.99738 | 44.85784 | 10.67164 | 12.94668 | 30.26363 | 15.35257 | 6.65167  |          |          |          |           |           |          |          |    |

|           |           |          |          |          |          |          |          |          |          |          |           |          |          |           |          |           |          |          |          |
|-----------|-----------|----------|----------|----------|----------|----------|----------|----------|----------|----------|-----------|----------|----------|-----------|----------|-----------|----------|----------|----------|
| AT1G02840 | SR34      | 861.9554 | 970.6298 | 891.0568 | 1070.218 | 1036.761 | 1021.762 | 921.3184 | 1008.762 | 1271.072 | 910.5993  | 907.2878 | 840.1202 | 0.199763  | 0.189441 | 0.23152   | 0.138842 | -0.03328 | 0.925908 |
| AT1G02850 | BGLU11    | 46.36725 | 78.50683 | 54.08148 | 266.8329 | 294.7979 | 275.1281 | 366.393  | 354.9548 | 281.1588 | 34.54328  | 41.24035 | 39.6645  | 2.189757  | 3.5e-28  | 2.445369  | 8.78e-35 | -0.5756  | 0.121931 |
| AT1G02860 | BAH1      | 165.2576 | 176.6404 | 190.5728 | 128.2612 | 128.5187 | 177.4377 | 211.6542 | 183.1065 | 184.2308 | 186.0554  | 196.8894 | 196.6408 | -0.30556  | 0.116912 | 0.112726  | 0.632392 | 0.099584 | 0.803737 |
| AT1G02870 | AT1G02870 | 147.4241 | 158.7979 | 158.3815 | 221.8796 | 248.4252 | 156.504  | 208.097  | 181.2535 | 226.4891 | 161.202   | 163.6311 | 129.4883 | 0.431399  | 0.042343 | 0.397959  | 0.078145 | -0.03197 | 0.955676 |
| AT1G02880 | TPK1      | 111.757  | 107.2705 | 105.5877 | 196.7222 | 180.1911 | 201.3618 | 214.3221 | 186.648  | 167.9143 | 101.7108  | 106.4267 | 108.7792 | 0.820394  | 1.96e-06 | 0.799775  | 6.79e-06 | -0.02986 | 0.954563 |
| AT1G02890 | AT1G02890 | 828.6661 | 672.6608 | 646.4025 | 501.4973 | 435.241  | 629.0065 | 712.3321 | 811.3252 | 425.6433 | 604.5074  | 565.3919 | 634.2908 | -0.44354  | 0.061104 | -0.13634  | 0.640591 | -0.23635 | 0.571285 |
| AT1G02900 | RALF1     | 10.70014 | 0        | 9.01358  | 24.74493 | 12.58688 | 10.96525 | 18.67537 | 6.47334  | 1.952492 | 6.716749  | 15.96401 | 11.39497 | 0.888325  | 0.141748 | 0.256163  | 0.73796  | 0.466381 | 0        |
| AT1G02910 | LPA1      | 506.4731 | 519.2156 | 515.0617 | 398.3934 | 376.9439 | 421.6636 | 529.1365 | 598.7839 | 510.5767 | 566.126   | 423.0462 | 522.6099 | -0.36085  | 0.013119 | 0.087226  | 0.636684 | -0.02258 | 0.953606 |
| AT1G02920 | GSTF7     | 153.3686 | 212.3253 | 194.4358 | 2035.683 | 2076.835 | 2213.983 | 2811.978 | 2549.417 | 3641.398 | 85.39867  | 103.766  | 105.6625 | 3.430577  | 9.07e-97 | 3.931099  | 2.1e-127 | -0.88747 | 0.000117 |
| AT1G02930 | GSTF6     | 228.2696 | 319.38   | 257.5309 | 3415.213 | 3510.414 | 3206.837 | 4358.476 | 3845.164 | 5125.291 | 173.6759  | 156.9794 | 217.5404 | 3.591036  | 3.5e-117 | 3.979925  | 2.4e-144 | -0.52684 | 0.030906 |
| AT1G02940 | GSTF5     | 2.377808 | 0        | 1.287654 | 2.062078 | 3.312336 | 1.993662 | 8.003731 | 10.7889  | 9.76246  | 0         | 0        | 1.035907 | 0.367184  | 0.624445 | 1.798124  | 0.003643 | -0.51013 | NA       |
| AT1G02950 | GSTF4     | 28.53369 | 23.1952  | 42.49259 | 14.84696 | 15.23675 | 12.95893 | 10.67164 | 11.86779 | 18.54867 | 23.98839  | 30.59768 | 41.43626 | -1.02348  | 0.006354 | -1.08188  | 0.006882 | 0.012907 | 0.990348 |
| AT1G02952 | AT1G02952 | 1.188904 | 0        | 0        | 0        | 0        | 0.662467 | 0        | 0        | 0        | 0         | 0        | 0        | -0.07436  | NA       | -0.18968  | NA       | -0.18606 | NA       |
| AT1G02960 | AT1G02960 | 282.9591 | 231.952  | 265.2568 | 235.4893 | 271.6116 | 245.2228 | 309.4776 | 238.4347 | 212.8216 | 295.537   | 274.0488 | 316.9874 | -0.05811  | 0.799225 | -0.03863  | 0.878966 | 0.177038 | 0.594139 |
| AT1G02965 | AT1G02965 | 0        | 0        | 0        | 0        | 0        | 0.662467 | 0        | 0        | 0        | 0         | 0        | 0        | 0.128567  | NA       | 0         | NA       | 0        | NA       |
| AT1G02970 | WEE1      | 20.21137 | 23.1952  | 32.19136 | 24.74493 | 21.19895 | 38.87679 | 19.56468 | 25.89336 | 9.76246  | 34.54328  | 25.27635 | 44.54398 | 0.121442  | 0.808108 | -0.40829  | 0.396518 | 0.4268   | 0.546548 |
| AT1G02980 | CUL2      | 0        | 0        | 1.287654 | 0.412416 | 0.662467 | 0        | 0.889303 | 2.15778  | 0        | 0.2878607 | 1.330334 | 1.035907 | -0.11879  | 0.873343 | 0.255405  | 0.729209 | 0.5835   | NA       |
| AT1G02990 | AT1G02990 | 336.4598 | 276.5581 | 260.1062 | 180.2368 | 184.8284 | 230.2702 | 241.0012 | 306.4047 | 205.9879 | 266.7509  | 280.7005 | 241.3662 | -0.54939  | 0.004268 | -0.21255  | 0.351036 | -0.14713 | 0.701439 |
| AT1G03000 | PEX6      | 361.4268 | 314.0273 | 352.8173 | 232.2193 | 215.9391 | 260.1754 | 299.6953 | 292.3792 | 32.3465  | 368.4617  | 347.2172 | 382.2495 | -0.50728  | 0.000776 | -0.31793  | 0.055896 | 0.090505 | 0.78061  |
| AT1G03010 | AT1G03010 | 47.55616 | 32.11643 | 32.19136 | 7.42348  | 8.612075 | 8.971567 | 11.56905 | 5.39445  | 3.904984 | 31.66468  | 46.56169 | 40.40035 | -1.95969  | 1.04e-07 | -2.08462  | 1.54e-07 | 0.06483  | 0.944595 |
| AT1G03020 | GRX51     | 14.26685 | 14.27397 | 14.1642  | 5.773818 | 3.974804 | 8.971567 | 12.45025 | 3.23667  | 8.786214 | 13.4335   | 21.28534 | 22.78994 | -1.0915   | 0.038261 | -0.63288  | 0.253215 | 0.37293  | NA       |
| AT1G03022 | AT1G03022 | 0        | 0        | 0        | 0        | 0        | 0        | 0        | 0        | 0        | 0         | 0        | 0        | #N/A      | #N/A     | #N/A      | #N/A     | #N/A     | #N/A     |
| AT1G03030 | AT1G03030 | 105.8125 | 105.2705 | 113.3136 | 166.2035 | 174.2289 | 159.4945 | 112.0522 | 148.8868 | 132.7695 | 122.8206  | 122.3907 | 126.3806 | 0.611324  | 0.000648 | 0.265156  | 0.219251 | 0.189206 | 0.595848 |
| AT1G03040 | BHLH7     | 290.0926 | 244.4417 | 302.5988 | 405.8169 | 412.0546 | 333.9417 | 364.6144 | 385.1637 | 408.0708 | 241.803   | 266.0668 | 232.0431 | 0.452494  | 0.002826 | 0.453416  | 0.003774 | -0.1854  | 0.514832 |
| AT1G03050 | AT1G03050 | 0        | 0        | 5.352738 | 1.287654 | 1.649662 | 0.996841 | 0        | 3.23667  | 1.952492 | 0.995936  | 1.330334 | 0        | -0.04051  | 0.962462 | -0.09381  | 0.913355 | -0.47335 | NA       |
| AT1G03055 | D27       | 35.66712 | 39.25341 | 50.21852 | 47.84021 | 38.4231  | 39.87363 | 49.80099 | 36.68226 | 50.76479 | 101.7108  | 101.1054 | 53.86714 | 0.01462   | 0.972739 | 0.124275  | 0.710505 | 0.968957 | 0.01211  |
| AT1G03060 | SPI       | 897.6225 | 499.5889 | 418.4877 | 200.0216 | 198.0777 | 295.6049 | 327.2637 | 406.7415 | 221.6078 | 411.6408  | 435.0192 | 405.0395 | -1.32107  | 1.04e-06 | -0.87932  | 0.002402 | -0.51064 | 0.245098 |
| AT1G03070 | AT1G03070 | 4.755616 | 1.784246 | 7.725926 | 4.948987 | 3.312336 | 1.993682 | 3.557214 | 2.15778  | 2.928738 | 2.878607  | 2.666668 | 6.215439 | -0.29163  | 0.693142 | -0.47874  | 0.521118 | -0.20243 | NA       |
| AT1G03080 | NET1D     | 1124.703 | 686.9347 | 773.8803 | 384.3713 | 433.9161 | 506.3951 | 564.7077 | 688.3318 | 552.5552 | 748.4378  | 864.7171 | 788.3249 | -0.947    | 4.78e-07 | -0.50854  | 0.012648 | -0.10755 | 0.79786  |
| AT1G03090 | MCCA      | 372.1269 | 408.5923 | 377.2827 | 233.0148 | 189.4656 | 248.2134 | 373.5075 | 414.2937 | 302.6363 | 369.4212  | 385.7969 | 373.9623 | -0.77484  | 7.79e-07 | -0.08361  | 0.649411 | -0.03384 | 0.935197 |
| AT1G03100 | AT1G03100 | 24.96698 | 21.41095 | 37.34198 | 25.15735 | 28.48609 | 39.87363 | 23.12189 | 43.1556  | 29.28738 | 13.4335   | 27.93701 | 27.96948 | 0.108317  | 0.823603 | 0.150644  | 0.768207 | -0.27144 | 0.732046 |
| AT1G03103 | AT1G03103 | 0        | 0        | 0        | 0        | 0        | 0        | 1.778607 | 0        | 0        | 0         | 0        | 0        | 0.248756  | NA       | 0         | NA       | 0        | NA       |
| AT1G03106 | AT1G03106 | 1.188904 | 1.784246 | 0        | 1.237247 | 0.662467 | 0.996841 | 0.889303 | 1.07889  | 0        | 0         | 0        | 0        | 0.073533  | NA       | -0.13127  | NA       | -0.52277 | NA       |
| AT1G03110 | TRM82     | 110.0568 | 78.50683 | 110.7383 | 104.3411 | 110.632  | 93.70303 | 80.92662 | 81.99564 | 77.12343 | 102.6703  | 115.7391 | 112.9138 | 0.077879  | 0.760607 | -0.28232  | 0.241245 | 0.16678  | 0.680453 |
| AT1G03120 | ATRA828   | 1.188904 | 0        | 1.287654 | 2.062078 | 0.662467 | 0.996841 | 0        | 3.23667  | 0.976246 | 0.995936  | 1.330334 | 3.10772  | 0.161273  | 0.838938 | 0.179849  | 0.828519 | 0.354433 | NA       |
| AT1G03130 | PSAD2     | 11661.96 | 14108.03 | 13502.34 | 6838.675 | 6198.044 | 5910.269 | 5100.155 | 5320.006 | 6373.91  | 14945.73  | 13957.86 | 13784.81 | -1.03952  | 5.87e-18 | -1.21191  | 3.98e-24 | 0.119257 | 0.626348 |
| AT1G03140 | AT1G03140 | 612.2855 | 769.01   | 690.1827 | 774.5164 | 764.4872 | 752.6148 | 739.9005 | 744.4341 | 837.6191 | 733.0852  | 663.8367 | 719.955  | 0.149691  | 0.278373 | 0.167827  | 0.242733 | 0.307248 | 0.901519 |
| AT1G03150 | AT1G03150 | 219.9472 | 223.0308 | 236.9284 | 261.4715 | 271.6116 | 225.286  | 210.7649 | 207.1469 | 207.9404 | 268.67    | 236.7994 | 253.7971 | 0.162035  | 0.329384 | -0.11817  | 0.533965 | 0.159739 | 0.566983 |
| AT1G03160 | FZL       | 577.8073 | 665.5238 | 556.2667 | 370.3492 | 392.1806 | 382.7869 | 580.7152 | 558.865  | 489.0902 | 582.4381  | 541.4459 | 616.3644 | -0.64148  | 3.41e-07 | -0.13765  | 0.38074  | -0.04181 | 0.893694 |
| AT1G03170 | FAF2      | 15.46575 | 8.92123  | 12.86754 | 7.835896 | 9.274542 | 2.990522 | 5.335821 | 4.31556  | 4.88123  | 10.55489  | 13.30334 | 3.10772  | -0.68296  | 0.210848 | -1.05768  | 0.060928 | -0.32591 | NA       |
| AT1G03180 | AT1G03180 | 24.96698 | 21.41095 | 20.62047 | 39.17948 | 54.98478 | 39.87363 | 44.46517 | 37.76115 | 15.52492 | 27.82653  | 23.94601 | 20.71813 | 0.5909735 | 0.010922 | 0.539205  | 0.190593 | 0.094017 | 0.920201 |
| AT1G03190 | UVH6      | 77.27876 | 67.80135 | 63.09506 | 80.00862 | 64.92179 | 79.74726 | 78.25871 | 66.89118 | 69.31347 | 74.84378  | 89.13238 | 68.36983 | 0.102161  | 0.723094 | 0.040001  | 0.90469  | 0.139902 | 0.779875 |
| AT1G03200 | AT1G03200 | 3.566712 | 14.27397 | 11.58889 | 9.485558 | 9.274542 | 7.974726 | 12.45025 | 12.94668 | 4.88123  | 4.797678  | 3.991002 | 6.215439 | -0.04773  | 0.947221 | 0.0801992 | 0.910932 | -0.66459 | NA       |
| AT1G03210 | AT1G03210 | 186.6579 | 203.404  | 256.2432 | 466.442  | 600.1953 | 487.4551 | 406.4117 | 282.6692 | 366.9922 | 176.5546  | 190.2378 | 168.8528 | 1.234847  | 7.16e-12 | 0.619198  | 0.300372 | -0.26699 | 0.443363 |
| AT1G03220 | AT1G03220 | 221.1361 | 157.0137 | 191.8605 | 490.5287 | 415.367  | 570.1929 | 599.3905 | 617.125  | 617.9637 | 145.8944  | 156.9794 | 125.3447 | 1.245647  | 8.35e-13 | 1.638758  | 1.46e-21 | -0.41532 | 0.160612 |
| AT1G03230 | AT1G03230 | 112.9459 | 82.07532 | 115.8889 | 174.4518 | 148.3927 | 215.3176 | 188.5323 | 220.0935 | 254.8002 | 71.00564  | 86.47171 | 66.29080 | 0.744531  | 0.000645 | 0.104481  | 1.08e-06 | -0.47699 | 0.187679 |
| AT1G03240 | AT1G03240 | 3.566712 | 1.784246 | 2.575309 | 2.062078 | 3.312336 | 0.996841 | 1.778607 | 1.07889  | 0.976246 | 3.838143  | 1.330334 | 3.10772  | -0.15856  | 0.846008 | -0.51132  | 0.505474 | 0.049157 | NA       |
| AT1G03250 | AT1G03250 | 183.0912 | 173.0719 | 197.0111 | 240.8507 | 221.2641 | 220.3018 | 180.5286 | 214.6991 | 224.5366 | 184.2308  | 158.3097 | 213.3967 | 0.297307  | 0.099377 | 0.154866  | 0.467025 | 0.008964 | 0.986682 |
| AT1G03260 | AT1G03260 | 87.97889 | 78.50683 | 77.25926 | 87.84452 | 98.04516 | 77.75358 | 68.69403 | 97.10009 | 72.2422  | 48.93632  | 59.86503 | 68.36983 | 0.112941  | 0.709958 | -0.10337  | 0.578628 | -0.44626 | 0.274581 |
| AT1G03270 | CBSDU4    | 35.66712 | 60.66437 | 38.62963 | 29.28151 | 21.86142 | 22.92734 | 21.34328 | 22.65669 | 15.52492 | 49.89585  | 47.89202 | 58.01077 | -0.75752  | 0.104846 | -0.97726  | 0.003093 | 0.232989 | 0.690605 |
| AT1G03280 | AT1G03280 | 388.     |          |          |          |          |          |          |          |          |           |          |          |           |          |           |          |          |          |

|           |           |          |          |          |          |          |          |          |          |          |          |          |          |          |          |          |          |          |          |
|-----------|-----------|----------|----------|----------|----------|----------|----------|----------|----------|----------|----------|----------|----------|----------|----------|----------|----------|----------|----------|
| AT1G03760 | AT1G03760 | 58.25629 | 51.74313 | 51.50617 | 80.83345 | 76.18374 | 94.69987 | 77.3694  | 91.70564 | 82.98091 | 61.41028 | 61.19536 | 60.08258 | 0.600016 | 0.009682 | 0.608922 | 0.012601 | 0.162801 | 0.746695 |
| AT1G03770 | RING1B    | 53.50068 | 51.74313 | 54.08148 | 59.80026 | 50.34751 | 53.8294  | 59.58333 | 58.26006 | 36.1211  | 67.16749 | 58.53469 | 42.47217 | 0.043906 | 0.906499 | -0.04875 | 0.903333 | 0.072591 | 0.917863 |
| AT1G03780 | TPX2      | 168.8244 | 128.4657 | 150.6556 | 170.74   | 175.5538 | 206.346  | 156.5114 | 151.0446 | 130.817  | 160.2424 | 164.9614 | 204.0736 | 0.277513 | 0.196613 | -0.04081 | 0.881067 | 0.225835 | 0.507685 |
| AT1G03790 | SOM       | 0        | 0        | 0        | 6.186234 | 3.312336 | 4.984204 | 5.335821 | 2.15778  | 0.976246 | 0        | 0        | 0        | 1.676501 | 0.006143 | 1.126191 | 0.087618 | 0        | NA       |
| AT1G03800 | ERF10     | 0        | 0        | 0        | 0.824831 | 1.324935 | 0.996841 | 0        | 2.15778  | 1.952492 | 1.919071 | 1.330334 | 0        | 0.507611 | 0.431728 | 0.630228 | 0.328301 | 0.513587 | 0.078801 |
| AT1G03810 | AT1G03810 | 0        | 0        | 0        | 0        | 0        | 0        | 0        | 0        | 0        | 0        | 0        | 0        | #N/A     | #N/A     | #N/A     | #N/A     | #N/A     | #N/A     |
| AT1G03820 | AT1G03820 | 53.50068 | 41.03766 | 60.51975 | 62.68177 | 52.99738 | 40.87047 | 68.47637 | 77.68008 | 115.197  | 40.3005  | 35.91902 | 39.36445 | 0.020194 | 0.960053 | 0.700764 | 0.019107 | -0.40598 | 0.440531 |
| AT1G03830 | AT1G03830 | 160.502  | 119.5445 | 118.4642 | 70.11065 | 82.80841 | 113.6398 | 88.04104 | 87.39009 | 75.17094 | 113.2252 | 134.3637 | 127.4165 | -0.5926  | 0.101211 | -0.65204 | 0.006639 | -0.09489 | 0.857778 |
| AT1G03840 | MGP       | 5.94452  | 1.784246 | 5.150617 | 4.124156 | 2.649869 | 2.990522 | 3.557214 | 2.15778  | 1.952492 | 4.797678 | 3.991002 | 5.179533 | -0.28033 | 0.705023 | -0.49518 | 0.504597 | 0.053001 | 0.0      |
| AT1G03850 | GRX513    | 16.64466 | 24.97944 | 19.31482 | 30.33449 | 309.3722 | 293.0712 | 108.495  | 93.86342 | 158.5159 | 10.55489 | 7.982004 | 11.39497 | 3.758506 | 2.75E-44 | 2.418182 | 6.82E-18 | -0.81292 | 0.142232 |
| AT1G03860 | PHB2      | 401.8495 | 397.8869 | 401.7482 | 454.482  | 480.2888 | 407.7079 | 375.2861 | 405.6626 | 400.2609 | 345.4328 | 380.4755 | 364.6391 | 0.162322 | 0.242808 | -0.02565 | 0.889016 | -0.14096 | 0.556396 |
| AT1G03870 | FLA9      | 426.8165 | 506.7259 | 467.4185 | 294.0523 | 266.9743 | 354.8753 | 135.1741 | 197.4369 | 280.1826 | 358.8663 | 332.5835 | 384.3213 | -0.59426 | 0.008429 | -1.15189 | 1.18E-07 | -0.36581 | 0.31129  |
| AT1G03880 | CRB       | 0        | 0        | 0        | 0        | 0        | 0        | 1.07889  | 0        | 0        | 0        | 0        | 0        | 0.16673  | NA       | 0.0      | NA       | 0        | NA       |
| AT1G03890 | CRD       | 0        | 0        | 0        | 0        | 0        | 0        | 0.889303 | 0        | 0.976246 | 0        | 0        | 0        | 0        | NA       | 0        | NA       | 0        | NA       |
| AT1G03900 | ATNAP4    | 681.242  | 710.1299 | 672.1556 | 1155.176 | 1084.459 | 1039.705 | 843.949  | 891.1631 | 866.9064 | 711.9754 | 762.2814 | 628.7953 | 0.665943 | 9.34E-10 | 0.332433 | 0.005491 | 0.026305 | 0.930488 |
| AT1G03905 | ABC19     | 13.07794 | 7.136984 | 14.1642  | 24.74493 | 21.86142 | 22.92734 | 34.68284 | 20.49891 | 18.54867 | 10.55489 | 10.64267 | 8.287252 | 0.858213 | 0.045133 | 0.939737 | 0.036516 | -0.22696 | 0.820724 |
| AT1G03910 | CTN       | 523.1177 | 506.7259 | 500.8975 | 504.3842 | 464.3896 | 524.3382 | 516.6853 | 579.3639 | 519.3629 | 496.0799 | 439.0102 | 470.3016 | -0.03774 | 0.812105 | 0.075176 | 0.635335 | -0.12004 | 0.607752 |
| AT1G03920 | AT1G03920 | 30.91115 | 19.62671 | 12.87654 | 6.186234 | 8.612075 | 8.971567 | 11.56095 | 6.47334  | 8.786214 | 18.23118 | 22.61568 | 20.71813 | -1.26188 | 0.003633 | -0.10593 | 0.02409  | -0.04936 | NA       |
| AT1G03930 | ADK1      | 554.0292 | 583.4485 | 542.1025 | 349.7284 | 349.1203 | 356.869  | 401.9652 | 397.0315 | 274.3251 | 519.1088 | 435.0192 | 559.3895 | -0.65695 | 5.66E-05 | -0.63279 | 0.000159 | -0.14385 | 0.656746 |
| AT1G03935 | AT1G03935 | 4.755616 | 7.136984 | 7.725926 | 7.011065 | 7.28714  | 13.95577 | 9.782338 | 15.10446 | 13.66744 | 12.47396 | 9.312338 | 5.179533 | 0.351216 | 0.562276 | 0.717965 | 0.178212 | 0.354547 | NA       |
| AT1G03940 | 3AT1      | 66.57862 | 69.5856  | 74.68395 | 64.33683 | 77.50867 | 76.75674 | 58.69403 | 60.41784 | 54.66978 | 53.734   | 47.89202 | 54.90305 | 0.040251 | 0.895619 | -0.26878 | 0.337383 | -0.4065  | 0.297388 |
| AT1G03950 | VPS2.3    | 117.7015 | 107.0548 | 112.0259 | 233.4272 | 220.6016 | 205.3492 | 128.7687 | 210.3835 | 198.1779 | 141.0571 | 160.9704 | 139.8474 | 0.951798 | 2.47E-09 | 0.874374 | 1.18E-07 | 0.370874 | 0.166173 |
| AT1G03960 | B"EPSILON | 146.2352 | 160.5821 | 148.0802 | 138.5716 | 139.1181 | 143.5451 | 177.8607 | 162.9124 | 125.9357 | 161.202  | 175.6041 | 159.5296 | -0.10642 | 0.626249 | 0.042078 | 0.870879 | 0.124723 | 0.740554 |
| AT1G03970 | GBF4      | 98.67903 | 148.0924 | 114.6012 | 117.9509 | 102.02   | 116.6304 | 118.2774 | 125.1512 | 129.8407 | 144.8899 | 148.9974 | 77.62999 | -0.08617 | 0.7873   | 0.056564 | 0.872763 | 0.046338 | 0.943956 |
| AT1G03980 | PCS2      | 1.188904 | 5.352738 | 2.575309 | 4.948987 | 6.246733 | 7.974726 | 1.778607 | 4.31556  | 0.976246 | 1.919071 | 2.660668 | 3.10772  | 0.813865 | 0.212361 | -0.18203 | 0.831626 | -0.06984 | NA       |
| AT1G03982 | RIC8      | 0        | 0        | 0        | 0        | 0        | 0        | 0        | 0        | 0        | 0        | 0        | 0        | #N/A     | #N/A     | #N/A     | #N/A     | #N/A     | #N/A     |
| AT1G03990 | FAO1      | 45.17835 | 46.3904  | 28.3284  | 23.09527 | 25.17376 | 22.92734 | 15.11816 | 24.81447 | 12.6912  | 42.21957 | 58.53469 | 52.83123 | -0.68809 | 0.039129 | -0.18751 | 0.001917 | 0.341284 | 0.556992 |
| AT1G04000 | AT1G04000 | 86.78999 | 69.5856  | 84.98519 | 51.96436 | 72.8714  | 58.81361 | 42.68657 | 43.1556  | 77.12343 | 56.6126  | 66.5167  | 41.43626 | -0.38404 | 0.214875 | -0.54142 | 0.087964 | -0.53628 | 0.239949 |
| AT1G04010 | PSAT      | 72.52134 | 96.34929 | 79.83457 | 69.28542 | 56.97219 | 56.81992 | 70.25498 | 49.78453 | 44.90732 | 73.88424 | 58.53469 | 58.01077 | -0.39961 | 0.171429 | -0.23918 | 0.476311 | -0.34969 | 0.472789 |
| AT1G04020 | BARD1     | 110.5681 | 71.36984 | 112.0259 | 79.59621 | 74.19633 | 67.78517 | 70.25498 | 59.33895 | 68.03759 | 111.3061 | 115.7391 | 124.3088 | -0.39971 | 0.12501  | -0.787   | 0.002386 | 0.232122 | 0.612836 |
| AT1G04030 | AT1G04030 | 57.06739 | 46.3904  | 56.65679 | 52.78919 | 48.36011 | 51.83572 | 58.69403 | 58.26006 | 41.97858 | 55.53167 | 97.11438 | 49.72351 | -0.17029 | 0.847782 | -0.02034 | 0.96157  | 0.311865 | 0.555797 |
| AT1G04040 | AT1G04040 | 555.2181 | 786.8525 | 512.9901 | 239.201  | 241.8006 | 295.0649 | 223.2152 | 222.2513 | 261.6339 | 77.2239  | 799.5307 | 771.7504 | -1.40986 | 3.32E-20 | -1.53302 | 8.06E-23 | 0.166435 | 0.580587 |
| AT1G04050 | SUVR1     | 61.82301 | 58.88012 | 42.49259 | 22.27044 | 15.89921 | 32.89575 | 15.1816  | 24.81447 | 20.50117 | 64.28889 | 50.55269 | 30.04129 | -1.12224 | 0.00125  | -1.30265 | 0.000338 | -0.15165 | 0.849275 |
| AT1G04070 | TOM9-1    | 13.07794 | 14.27397 | 18.07613 | 30.93117 | 25.83622 | 20.93366 | 24.01119 | 20.49891 | 36.1211  | 6.835821 | 15.96401 | 15.5386  | 0.711246 | 0.086106 | 0.734733 | 0.039686 | -0.17642 | 0.857778 |
| AT1G04080 | PRP39     | 1173.448 | 1157.976 | 1134.423 | 1019.079 | 833.3838 | 1111.477 | 1053.825 | 1170.596 | 633.5837 | 1136.09  | 935.2248 | 1058.696 | -0.21985 | 0.350541 | -0.27048 | 0.259604 | -0.14217 | 0.739371 |
| AT1G04090 | AT1G04090 | 5.94452  | 7.136984 | 7.725926 | 4.948987 | 2.649869 | 5.981045 | 3.557214 | 6.47334  | 2.928738 | 7.676285 | 10.64267 | 12.43088 | -0.47775 | 0.466998 | -0.50272 | 0.457137 | 0.458221 | 0.0      |
| AT1G04100 | IAA10     | 48.74506 | 39.25341 | 42.49259 | 44.12847 | 48.36011 | 35.88627 | 38.24005 | 39.91893 | 58.57476 | 39.34096 | 59.86503 | 38.32854 | -0.0198  | 0.961442 | 0.03538  | 0.899942 | 0.044492 | 0.957023 |
| AT1G04110 | SBT1.2    | 24.96698 | 39.25341 | 43.78025 | 17.32145 | 21.86142 | 20.93366 | 38.24005 | 24.81447 | 21.47747 | 27.82653 | 23.94601 | 35.22082 | -0.77749 | 0.029509 | -0.30283 | 0.478709 | -0.26552 | 0.705052 |
| AT1G04120 | ABC5      | 77.921   | 560.2533 | 569.1432 | 419.4266 | 442.5281 | 545.2719 | 482.8198 | 521.1038 | 371.9497 | 589.1549 | 580.0256 | 554.21   | -0.43729 | 0.020495 | -0.46527 | 0.016383 | -0.14736 | 0.686454 |
| AT1G04130 | TPR2      | 54.68958 | 53.52738 | 78.54691 | 78.77137 | 85.45828 | 60.80729 | 62.25124 | 49.62894 | 54.66978 | 66.20796 | 65.18636 | 91.15977 | 0.262375 | 0.369556 | -0.16166 | 0.640234 | 0.237339 | 0.637897 |
| AT1G04140 | AT1G04140 | 927.3451 | 915.3182 | 762.2914 | 565.0093 | 517.3869 | 725.7001 | 714.1107 | 782.1952 | 515.4579 | 605.467  | 521.4909 | 664.0161 | -0.51618 | 0.080341 | -0.36339 | 0.08607  | -0.52522 | 0.045478 |
| AT1G04150 | AT1G04150 | 5.94452  | 1.784246 | 0        | 1.237247 | 1.987402 | 0.996841 | 1.778607 | 4.31556  | 0.976246 | 6.716749 | 2.660668 | 1.035907 | -0.4402  | 0.554878 | -0.09762 | 0.912108 | 0.227588 | NA       |
| AT1G04160 | XI-B      | 109.3792 | 105.2705 | 90.1358  | 36.70499 | 35.11077 | 46.85152 | 59.58333 | 57.18117 | 17.57243 | 124.7396 | 114.4087 | 98.41112 | -1.27916 | 2.83E-05 | -1.09743 | 0.000579 | 0.1416   | 0.825881 |
| AT1G04170 | EIF2      | 1157.992 | 1095.527 | 1191.088 | 928.3475 | 971.177  | 1006.809 | 976.4552 | 921.372  | 949.8874 | 1095.739 | 988.4381 | 1176.79  | -0.24635 | 0.027663 | -0.27332 | 0.017341 | -0.07801 | 0.725981 |
| AT1G04171 | AT1G04171 | 0        | 0        | 0        | 0        | 0        | 0        | 0        | 0        | 0        | 0        | 0        | 0        | #N/A     | #N/A     | #N/A     | #N/A     | #N/A     | #N/A     |
| AT1G04180 | YUC9      | 11.88904 | 19.62671 | 14.1642  | 0        | 0        | 0        | 0        | 0        | 0        | 8.635821 | 3.991002 | 11.39497 | -3.39271 | 1.9E-09  | -3.10615 | 6.08E-08 | -0.723   | NA       |
| AT1G04190 | TPR3      | 292.4704 | 285.4794 | 369.5568 | 413.2404 | 425.304  | 387.7113 | 354.8321 | 346.3237 | 328.0187 | 355.0282 | 271.3881 | 350.1364 | 0.364413 | 0.024132 | 0.113819 | 0.572885 | 0.044466 | 0.910384 |
| AT1G04200 | AT1G04200 | 277.0146 | 253.3629 | 245.942  | 314.6731 | 265.6494 | 398.7363 | 377.0647 | 342.0081 | 188.4155 | 327.9648 | 232.8084 | 238.2585 | 0.317883 | 0.225718 | 0.216065 | 0.46117  | -0.12635 | 0.81058  |
| AT1G04210 | AT1G04210 | 645.5748 | 504.9416 | 553.6914 | 374.4733 | 375.6189 | 481.4741 | 52.02211 | 491.9738 | 319.2324 | 426.9934 | 419.0552 | 499.3069 | -0.46199 | 0.025737 | -0.34662 | 0.121994 | -0.33344 | 0.307907 |
| AT1G04220 | KCS17     | 46.36725 | 26.76369 | 34.76667 | 20.20836 | 23.18635 | 17.94313 | 9.782338 | 14.02557 | 15.61994 | 30.70514 | 45.23135 | 60.80337 | -0.76008 | 0.032153 | -1.32954 | 0.009363 | -0.09887 | 0.905042 |
| AT1G04230 | AT1G04230 | 97.49012 | 105.2705 | 93.99877 | 120.0129 | 116.5942 | 126.5988 | 94.26617 | 92.78453 | 93.71962 | 94.99403 | 111.7481 | 89.67571 | -0.28763 | 0.169586 |          |          |          |          |



|           |           |          |          |          |          |          |          |          |          |          |          |          |          |          |          |          |          |          |          |
|-----------|-----------|----------|----------|----------|----------|----------|----------|----------|----------|----------|----------|----------|----------|----------|----------|----------|----------|----------|----------|
| AT1G04690 | KAB1      | 888.1112 | 940.2977 | 999.2198 | 1185.282 | 1177.204 | 1163.313 | 1216.567 | 1000.131 | 1187.115 | 908.6802 | 897.9754 | 1001.722 | 0.316006 | 0.008737 | 0.266283 | 0.037014 | -0.00896 | 0.979828 |
| AT1G04700 | AT1G04700 | 21.40027 | 24.97944 | 15.45185 | 13.1973  | 6.624673 | 28.90838 | 15.11816 | 17.26224 | 7.809968 | 26.867   | 19.95501 | 20.71813 | -0.32902 | 0.539815 | -0.50939 | 0.35371  | 0.128801 | 0.90649  |
| AT1G04710 | KAT1      | 107.0014 | 144.5239 | 137.779  | 125.7868 | 74.19633 | 122.6114 | 139.6206 | 134.8612 | 121.0545 | 119.942  | 99.77505 | 146.0628 | -0.25368 | 0.356684 | 0.029382 | 0.933595 | -0.07426 | 0.899441 |
| AT1G04720 | AT1G04720 | 0        | 0        | 0        | 0        | 0        | 0        | 0        | 0        | 0        | 0        | 0        | 0        | #N/A     | #N/A     | #N/A     | #N/A     | #N/A     | #N/A     |
| AT1G04730 | VF18      | 73.71204 | 71.36984 | 70.82099 | 41.65397 | 42.39791 | 49.84204 | 49.91169 | 55.02339 | 60.26363 | 81.56053 | 101.1054 | 88.05205 | -0.67582 | 0.007909 | -0.65831 | 0.01581  | 0.308912 | 0.480747 |
| AT1G04750 | CAMP721   | 110.0666 | 674.445  | 676.0185 | 1125.907 | 1107.645 | 1088.55  | 991.5734 | 1002.289 | 1066.321 | 653.4438 | 626.5873 | 732.3859 | 0.746995 | 3.4E-06  | 0.804746 | 5.78E-07 | 0.03765  | 0.930326 |
| AT1G04760 | VAMP726   | 14.26685 | 21.41095 | 10.30123 | 30.93117 | 33.12336 | 20.43116 | 40.99782 | 25.3824  | 32.62421 | 30.59768 | 25.89766 | 0.835158 | 0.032515 | 0.882713 | 0.03007  | 0.873402 | 0.12325  | 0.83446  |
| AT1G04770 | AT1G04770 | 196.1692 | 215.8938 | 202.1617 | 157.9552 | 159.6546 | 209.9365 | 115.6095 | 103.5734 | 152.2944 | 244.6816 | 270.0578 | 210.289  | -0.4352  | 0.024688 | -0.70224 | 0.000303 | 0.234064 | 0.481893 |
| AT1G04778 | AT1G04778 | 1.188904 | 0        | 0        | 1.237247 | 0        | 0        | 1.778607 | 1.07889  | 1.952492 | 1.919071 | 1.330334 | 3.10772  | -0.06679 | 0.934806 | 0.513787 | 0.470463 | 0.701332 | NA       |
| AT1G04780 | AT1G04780 | 565.9183 | 501.3731 | 460.9803 | 411.1783 | 397.4804 | 464.5278 | 478.4453 | 565.3383 | 456.8831 | 372.2998 | 393.7789 | 395.7163 | -0.26501 | 0.080008 | -0.02858 | 0.889554 | -0.39213 | 0.048717 |
| AT1G04790 | AT1G04790 | 243.7253 | 249.7944 | 243.3667 | 234.6645 | 252.4    | 230.2702 | 264.1231 | 275.1169 | 193.2967 | 235.0862 | 240.7904 | 275.5511 | -0.03637 | 0.871533 | -0.00808 | 0.937382 | 0.029278 | 0.949282 |
| AT1G04800 | AT1G04800 | 442.2723 | 499.5889 | 464.8432 | 138.984  | 134.4809 | 110.6493 | 115.6095 | 157.5179 | 348.5198 | 367.5021 | 417.7249 | 334.5978 | -1.75401 | 4.22E-10 | -1.10791 | 0.00016  | -0.31    | 0.566983 |
| AT1G04810 | RPN2B     | 600.3965 | 558.469  | 479.0074 | 399.2183 | 404.105  | 449.5752 | 486.449  | 540.5239 | 378.7834 | 439.4673 | 446.9922 | 420.5781 | -0.38281 | 0.019168 | -0.21745 | 0.238547 | -0.32035 | 0.193637 |
| AT1G04820 | TUBA4     | 3886.527 | 3300.855 | 3381.38  | 2651.832 | 2785.012 | 2847.974 | 2222.369 | 2487.92  | 2576.313 | 3301.762 | 3014.537 | 3255.854 | -0.34967 | 0.001623 | -0.53313 | 8.21E-07 | -0.14209 | 0.469967 |
| AT1G04830 | AT1G04830 | 189.0357 | 219.4623 | 212.463  | 187.0283 | 178.8662 | 166.4724 | 175.1928 | 181.2535 | 130.817  | 159.2829 | 227.4871 | 174.0323 | -0.26658 | 0.198209 | -0.33794 | 0.114619 | -0.14795 | 0.700947 |
| AT1G04840 | PCMP464   | 16.64466 | 17.84246 | 9.01358  | 6.660727 | 11.92441 | 14.95261 | 8.893035 | 20.49891 | 10.73871 | 10.55489 | 13.30334 | 17.61041 | -0.27192 | 0.620544 | -0.09871 | 0.879853 | -0.04439 | NA       |
| AT1G04850 | AT1G04850 | 836.9884 | 843.9484 | 856.2901 | 1078.467 | 1128.182 | 1038.708 | 975.5659 | 1024.945 | 1346.243 | 837.6746 | 740.996  | 772.7861 | 0.35087  | 0.016223 | 0.394057 | 0.007753 | -0.1072  | 0.712944 |
| AT1G04860 | URP2      | 455.3502 | 397.8869 | 378.5704 | 251.9859 | 270.2866 | 287.0901 | 364.6144 | 354.9548 | 279.2064 | 363.664  | 421.7159 | 399.7163 | -0.60325 | 6.95E-05 | -0.29951 | 0.078771 | -0.06386 | 0.860039 |
| AT1G04870 | PRMT10    | 211.6249 | 233.7362 | 234.3531 | 245.3873 | 276.2489 | 259.1786 | 240.1119 | 213.6202 | 121.8216 | 173.6759 | 187.5771 | 200.1181 | 0.19835  | 0.227589 | -0.02288 | 0.91701  | -0.2647  | 0.295987 |
| AT1G04880 | HMG815    | 4.755616 | 1.784246 | 6.438272 | 0.824831 | 1.324935 | 2.990522 | 3.55214  | 0        | 9.282738 | 4.797678 | 2.660668 | 2.071813 | -0.85631 | 0.205492 | -0.57387 | 0.464634 | -0.27897 | NA       |
| AT1G04890 | AT1G04890 | 2.377808 | 0        | 0        | 0        | 0.662467 | 0        | 0        | 1.07889  | 0        | 0        | 0        | 0        | -0.2661  | NA       | -0.19704 | NA       | -0.36798 | NA       |
| AT1G04900 | AT1G04900 | 74.90095 | 89.2123  | 100.437  | 87.4321  | 108.6446 | 107.6588 | 115.6095 | 94.94231 | 109.3396 | 83.4796  | 67.84703 | 84.94434 | 0.185528 | 0.461437 | 0.27231  | 0.285686 | -0.14603 | 0.757455 |
| AT1G04910 | AT1G04910 | 222.325  | 206.9725 | 197.0111 | 239.6134 | 261.0121 | 232.2639 | 227.6617 | 245.9869 | 194.273  | 203.4216 | 190.2378 | 242.4021 | 0.222803 | 0.217356 | 0.088439 | 0.687246 | 0.023823 | 0.959203 |
| AT1G04920 | SP3       | 17.83356 | 16.05821 | 30.9037  | 22.68286 | 17.88662 | 17.94313 | 23.12189 | 25.89336 | 16.59618 | 25.90746 | 29.26735 | 27.96489 | -0.1343  | 0.775281 | -0.0047  | 0.993012 | 0.306067 | 0.672298 |
| AT1G04930 | AT1G04930 | 32.10041 | 33.90067 | 12.87654 | 28.45667 | 25.17376 | 22.92734 | 23.34328 | 18.34113 | 26.35864 | 13.4335  | 10.64267 | 12.43088 | -0.00045 | 0.99968  | -0.20825 | 0.675166 | -0.9414  | 0.107459 |
| AT1G04940 | TIC20-I   | 43.98945 | 53.52738 | 45.0679  | 18.5506  | 49.68505 | 45.85468 | 48.91169 | 48.55005 | 101.5296 | 64.28889 | 71.83803 | 65.26211 | 0.117794 | 0.765139 | 0.45813  | 0.189604 | 0.470805 | 0.357314 |
| AT1G04945 | AT1G04945 | 29.7226  | 49.95889 | 52.79383 | 79.59621 | 100.0326 | 78.75042 | 70.25498 | 65.81229 | 56.62227 | 45.09817 | 55.23135 | 37.29264 | 0.939084 | 0.000319 | 0.529674 | 0.076509 | -0.03823 | 0.961153 |
| AT1G04950 | TAF6      | 291.2815 | 297.9691 | 292.2975 | 240.0259 | 244.4504 | 288.087  | 273.0162 | 282.6692 | 206.9642 | 318.5658 | 304.6465 | 272.4434 | -0.19318 | 0.292258 | -0.20502 | 0.291222 | 0.023288 | 0.959203 |
| AT1G04960 | AT1G04960 | 193.7913 | 214.1095 | 249.8049 | 274.2564 | 274.9239 | 261.1723 | 281.9092 | 294.537  | 249.919  | 209.1788 | 210.1928 | 217.5404 | 0.299011 | 0.059635 | 0.323838 | 0.050935 | -0.0453  | 0.905663 |
| AT1G04970 | AT1G04970 | 419.6831 | 369.3389 | 381.1457 | 446.6461 | 461.0772 | 461.5373 | 499.7886 | 459.6071 | 428.572  | 395.2387 | 478.9202 | 410.219  | 0.219442 | 0.126607 | 0.24056  | 0.108605 | 0.125016 | 0.631455 |
| AT1G04980 | PDIL2-Z   | 76.08985 | 71.36984 | 64.38272 | 514.2822 | 570.3843 | 479.4804 | 351.2749 | 364.6648 | 479.3368 | 39.34096 | 53.21336 | 62.15439 | 2.801901 | 1.26E-47 | 2.418838 | 4.87E-35 | -0.43982 | 0.250049 |
| AT1G04985 | AT1G04985 | 202.1137 | 264.0684 | 211.1753 | 274.2564 | 237.1633 | 235.2544 | 212.5454 | 206.0125 | 327.0424 | 198.6239 | 162.3007 | 212.3608 | 0.148287 | 0.53085  | 0.239509 | 0.307619 | -0.22209 | 0.553047 |
| AT1G04990 | AT1G04990 | 137.9129 | 119.5445 | 123.6148 | 228.4782 | 234.5134 | 203.3555 | 261.4552 | 250.3025 | 251.8715 | 164.8006 | 228.8174 | 124.3808 | 0.780144 | 0.000143 | 0.968604 | 2.05E-06 | 0.410788 | 0.216294 |
| AT1G05000 | AT1G05000 | 15.45575 | 19.62671 | 31.91482 | 40.82914 | 35.11077 | 24.92102 | 40.01866 | 22.65669 | 30.26363 | 10.55489 | 9.312338 | 17.61041 | 0.842311 | 0.029510 | 0.711778 | 0.090819 | -0.44054 | 0.564516 |
| AT1G05010 | AC04      | 1480.185 | 1843.126 | 1837.483 | 2255.913 | 2068.885 | 2571.849 | 2539.851 | 2651.911 | 3101.534 | 1879.73  | 1842.513 | 1674.025 | 0.41289  | 0.004939 | 0.67611  | 1.21E-06 | 0.06443  | 0.846712 |
| AT1G05020 | AP180     | 4.755616 | 17.36984 | 6.438272 | 5.738181 | 2.649869 | 14.95261 | 1.778607 | 9.710009 | 2.928738 | 11.51443 | 17.29434 | 11.39497 | 0.195262 | 0.047996 | -0.25344 | 0.743308 | 0.842208 | NA       |
| AT1G05030 | AT1G05030 | 148.6113 | 165.9349 | 145.5049 | 164.9662 | 188.1407 | 199.3682 | 208.097  | 186.648  | 165.9618 | 178.4736 | 179.5951 | 176.1041 | 0.255436 | 0.166852 | 0.287484 | 0.138523 | 0.216797 | 0.487627 |
| AT1G05040 | AT1G05040 | 0        | 0        | 0        | 1.649662 | 2.649869 | 0.996841 | 0.889303 | 1.07889  | 0.972646 | 0        | 0        | 0        | 0.942852 | NA       | 0.513551 | NA       | -0.128   | NA       |
| AT1G05055 | ATGTF2H2  | 109.3792 | 98.13353 | 121.0395 | 140.2213 | 113.9444 | 146.5356 | 109.3843 | 112.2046 | 98.60085 | 113.2252 | 74.4987  | 107.7343 | 0.269932 | 0.243046 | -0.04334 | 0.888489 | -0.14202 | 0.756214 |
| AT1G05060 | AT1G05060 | 143.8574 | 165.9349 | 177.6963 | 207.8574 | 223.2515 | 217.3113 | 243.6692 | 186.648  | 210.8691 | 113.2252 | 133.0334 | 151.2442 | 0.404626 | 0.028683 | 0.393034 | 0.044078 | -0.28663 | 0.363731 |
| AT1G05061 | AT1G05061 | 2.377808 | 1.784246 | 2.575309 | 4.949887 | 0.662467 | 3.987363 | 4.466517 | 6.47334  | 3.904984 | 8.767285 | 2.660668 | 3.10772  | 0.240161 | 0.757446 | 0.628367 | 0.389854 | 0.559339 | NA       |
| AT1G05065 | CL20      | 13.07794 | 5.352738 | 6.438272 | 11.13522 | 13.24935 | 10.96525 | 5.335821 | 6.47334  | 9.76246  | 13.4335  | 7.982004 | 13.46678 | 0.381395 | 0.499311 | -0.20911 | 0.759292 | 0.374612 | NA       |
| AT1G05070 | AT1G05070 | 129.5905 | 181.9931 | 137.779  | 210.7444 | 215.9643 | 164.4787 | 149.403  | 143.4924 | 222.5841 | 179.4332 | 186.2468 | 179.2118 | 0.401277 | 0.079146 | 0.203102 | 0.449372 | 0.279453 | 0.471543 |
| AT1G05080 | AT1G05080 | 0        | 0        | 1.287654 | 0        | 0        | 0        | 0        | 0        | 0        | 0        | 1.330334 | 0        | -0.22987 | NA       | -0.21319 | NA       | -0.06755 | NA       |
| AT1G05085 | AT1G05085 | 3.566712 | 1.784246 | 0        | 0.824831 | 0.662467 | 1.993682 | 0.889303 | 0        | 0        | 0.995936 | 0        | 0.310772 | -0.25817 | 0.731947 | -0.65201 | 0.337656 | -0.128   | NA       |
| AT1G05090 | AT1G05090 | 217.5694 | 214.1095 | 207.3123 | 183.1125 | 164.2919 | 219.305  | 224.1045 | 193.1213 | 133.7457 | 229.329  | 222.1658 | 203.0377 | -0.17488 | 0.455779 | -0.2064  | 0.401294 | 0.033805 | 0.950436 |
| AT1G05100 | MAPKK18   | 7.133424 | 5.352738 | 2.575309 | 23.50769 | 19.87402 | 33.89259 | 21.34328 | 11.86779 | 12.6912  | 9.595356 | 6.65167  | 1.035907 | 1.854296 | 0.000147 | 1.207802 | 0.025405 | 0.098566 | NA       |
| AT1G05120 | AT1G05120 | 150.9908 | 146.3082 | 144.2173 | 168.2656 | 129.8436 | 165.4756 | 176.0821 | 181.2535 | 140.1817 | 147.7685 | 105.0964 | 125.3447 | 0.068301 | 0.996758 | 0.139883 | 0.955139 | -0.20904 | 0.596904 |
| AT1G05135 | AT1G05135 | 171.2022 | 178.4246 | 139.0667 | 180.2256 | 168.2667 | 209.3366 | 92.48756 | 140.2557 | 238.204  | 134.335  | 94.45371 | 88.05205 | 0.180845 | 0.606285 | -0.04936 | 0.950356 | -0.58111 | 0.199307 |
| AT1G05136 | AT1G05136 | 0        | 0        | 0        | 0.412416 | 0.662467 | 0        | 0        | 1.07889  | 0        |          |          |          |          |          |          |          |          |          |

|           |           |          |          |          |           |          |          |          |          |          |           |          |           |           |          |           |          |           |          |
|-----------|-----------|----------|----------|----------|-----------|----------|----------|----------|----------|----------|-----------|----------|-----------|-----------|----------|-----------|----------|-----------|----------|
| AT1G05630 | 5PTASE13  | 353.1045 | 346.1437 | 310.3247 | 382.3092  | 343.158  | 410.6984 | 223.2152 | 288.0636 | 200.1304 | 276.3463  | 267.3971 | 242.4021  | 0.166712  | 0.375274 | -0.49778  | 0.004182 | -0.35345  | 0.166194 |
| AT1G05640 | AT1G05640 | 41.61164 | 24.97944 | 33.47901 | 23.50769  | 27.82363 | 21.9305  | 25.7898  | 29.13003 | 13.66744 | 33.58375  | 25.27635 | 25.89766  | -0.42944  | 0.255608 | -0.52159  | 0.194105 | -0.23158  | 0.749826 |
| AT1G05650 | AT1G05650 | 0        | 0        | 0        | 0.412416  | 0.662467 | 0        | 0        | 0        | 0        | 0.995936  | 0        | 0.1035907 | 0.223894  | NA       | 0         | NA       | 0.374818  | NA       |
| AT1G05660 | AT1G05660 | 0        | 0        | 0        | 0         | 0        | 0        | 0        | 0        | 0        | 0         | 0        | 0         | #N/A      | #N/A     | #N/A      | #N/A     | #N/A      | #N/A     |
| AT1G05670 | AT1G05670 | 103.4346 | 90.99655 | 90.1358  | 62.27475  | 49.68505 | 64.79465 | 96.04478 | 108.9679 | 55.64602 | 97.87263  | 67.84703 | 98.41112  | -0.65957  | 0.015493 | -0.12486  | 0.762633 | -0.0962   | 0.879034 |
| AT1G05675 | UG774E1   | 3.566712 | 14.27397 | 10.30123 | 37.94223  | 33.12336 | 51.83572 | 61.36194 | 69.04896 | 98.60085 | 5.757214  | 3.991002 | 6.215439  | 1.890508  | 1.31E-06 | -2.750503 | 3.65E-13 | -0.5365   | 0.535672 |
| AT1G05680 | UG774E2   | 5.94452  | 5.523738 | 6.438272 | 34.64291  | 33.78583 | 60.80729 | 80.92662 | 63.65451 | 48.8123  | 9.595356  | 21.28534 | 10.35907  | 2.301846  | 3.07E-08 | 2.86731   | 2.56E-12 | 0.817171  | 0.271195 |
| AT1G05690 | BT3       | 51.12287 | 80.2917  | 52.79383 | 69.28582  | 59.62205 | 76.75674 | 70.25498 | 72.28563 | 52.71728 | 65.24842  | 65.18636 | 45.97989  | 0.170504  | 0.598902 | 0.103703  | 0.777493 | -0.04195  | 0.95496  |
| AT1G05700 | AT1G05700 | 0        | 0        | 0        | 1.237247  | 2.649869 | 0        | 0        | 2.15778  | 1.952492 | 0.995936  | 0        | 0.1035907 | 0.626323  | 0.305179 | 0.594566  | 0.348421 | 0.314523  | NA       |
| AT1G05710 | AT1G05710 | 41.61164 | 37.46917 | 46.35556 | 144.3455  | 137.1307 | 144.5419 | 169.857  | 134.8612 | 167.9143 | 49.89585  | 66.5167  | 52.83123  | 1.685552  | 5.3E-15  | 1.833965  | 2.95E-17 | 0.37785   | 0.369773 |
| AT1G05720 | AT1G05720 | 185.469  | 221.2465 | 187.9975 | 340.6553  | 335.2084 | 285.0965 | 240.1119 | 214.6991 | 301.66   | 189.9881  | 215.5141 | 162.6373  | 0.688179  | 0.000131 | 0.346248  | 0.091809 | -0.06279  | 0.889374 |
| AT1G05730 | AT1G05730 | 14.26685 | 16.05821 | 15.45185 | 17.32145  | 20.53649 | 18.93997 | 12.45025 | 12.94668 | 22.45366 | 9.595356  | 6.65167  | 10.35907  | 0.285452  | 0.557214 | 0.063831  | 0.915603 | -0.63088  | NA       |
| AT1G05740 | AT1G05740 | 0        | 0        | 0        | 0.412416  | 0.662467 | 0.996841 | 0.889303 | 1.07889  | 0        | 0.995936  | 0        | 0.1035907 | 0.369992  | NA       | 0.357067  | NA       | 0.380059  | NA       |
| AT1G05750 | PDE247    | 68.95643 | 66.0171  | 64.38272 | 66.39891  | 52.99738 | 77.75358 | 66.69776 | 76.60119 | 55.64602 | 50.85539  | 66.5167  | 61.11849  | -0.02732  | 0.936783 | -0.00654  | 0.985734 | -0.16226  | 0.763527 |
| AT1G05760 | RTM1      | 0        | 0        | 0        | 0         | 0        | 0        | 0        | 0        | 0        | 0         | 0        | 0         | #N/A      | #N/A     | #N/A      | #N/A     | #N/A      | #N/A     |
| AT1G05770 | JAL2      | 5.94452  | 3.568492 | 3.826963 | 3.71174   | 1.987402 | 2.990522 | 0.889303 | 2.15778  | 3.904984 | 5.757214  | 1.330334 | 6.215439  | -0.39308  | 0.587174 | -0.58274  | 0.430181 | 0.022582  | NA       |
| AT1G05780 | AT1G05780 | 45.17835 | 49.95889 | 47.64321 | 49.07745  | 51.00998 | 44.85784 | 50.6903  | 50.70783 | 46.85981 | 49.89585  | 63.85603 | 31.0772   | 0.031008  | 0.936359 | 0.056098  | 0.889789 | 0.007547  | 0.992858 |
| AT1G05785 | AT1G05785 | 185.469  | 46.3904  | 41.20494 | 71.76031  | 93.40789 | 60.80729 | 65.80846 | 58.26006 | 69.31347 | 21.10978  | 30.59768 | 26.93357  | 0.814756  | 0.000265 | 0.589735  | 0.048996 | -0.64503  | 0.161832 |
| AT1G05790 | AT1G05790 | 250.8587 | 280.1266 | 261.3938 | 274.6688  | 259.6872 | 294.068  | 344.1604 | 353.8759 | 220.6312 | 250.4388  | 332.5835 | 224.7917  | 0.062877  | 0.818053 | 0.209116  | 0.406881 | 0.024286  | 0.966307 |
| AT1G05800 | DGL       | 0        | 0        | 0        | 0         | 0        | 0.996841 | 0.889303 | 0        | 0        | 0         | 0        | 0         | 0.133397  | NA       | 0.133015  | NA       | 0         | NA       |
| AT1G05805 | BHLH12A   | 328.1375 | 415.7293 | 392.7346 | 533.2533  | 516.062  | 532.313  | 530.0249 | 458.5282 | 436.382  | 338.5761  | 412.4035 | 383.2854  | 0.475608  | 0.001352 | 0.328027  | 0.037904 | -0.00074  | 0.9982   |
| AT1G05810 | ARA       | 104.6235 | 139.1972 | 100.4656 | 126.11992 | 111.957  | 141.5514 | 88.93035 | 96.0212  | 117.1495 | 129.7163  | 110.4177 | 114.9856  | 0.109478  | 0.661396 | -0.20644  | 0.414892 | 0.02482   | 0.965356 |
| AT1G05820 | SPPL5     | 29.7226  | 42.8219  | 37.34198 | 22.27044  | 23.18635 | 27.91154 | 27.56841 | 25.89336 | 11.71495 | 39.34096  | 33.25835 | 34.18492  | -0.54002  | 0.128285 | -0.67267  | 0.07409  | -0.01549  | 0.98764  |
| AT1G05830 | ATX2      | 331.7042 | 376.4759 | 348.9543 | 325.8083  | 307.3848 | 342.9132 | 348.607  | 326.9037 | 223.5603 | 378.057   | 353.8688 | 328.3824  | -0.11136  | 0.599965 | -0.22564  | 0.273085 | 0.00742   | 0.988849 |
| AT1G05835 | AT1G05835 | 52.31177 | 49.95889 | 64.38272 | 61.03751  | 68.8966  | 60.80729 | 43.57587 | 36.68226 | 66.38473 | 66.20796  | 111.7481 | 70.44164  | -0.17747  | 0.642587 | -0.17747  | 0.642587 | 0.525592  | 0.244416 |
| AT1G05840 | AT1G05840 | 292.4704 | 335.4383 | 318.0506 | 339.8304  | 323.284  | 363.8469 | 353.0535 | 326.9037 | 281.1588 | 317.6063  | 361.8508 | 320.0951  | 0.118397  | 0.490538 | 0.027547  | 0.896255 | 0.07927   | 0.80625  |
| AT1G05850 | CTL1      | 8001.324 | 7893.916 | 7127.167 | 2633.686  | 2609.459 | 2650.6   | 2386.001 | 2589.336 | 2422.066 | 6702.356  | 6754.106 | 5641.547  | -1.59429  | 1.92E-52 | -1.59429  | 1.92E-52 | -0.23642  | 0.134773 |
| AT1G05860 | AT1G05860 | 118.8904 | 119.5445 | 135.2037 | 134.8599  | 130.5061 | 141.5514 | 108.495  | 126.2301 | 81.02842 | 144.8899  | 191.5681 | 140.8833  | 0.115612  | 0.650935 | -0.20025  | 0.345155 | 0.333935  | 0.329153 |
| AT1G05870 | AT1G05870 | 257.9922 | 319.38   | 311.6124 | 267.2453  | 226.5638 | 228.2765 | 148.5137 | 132.7035 | 162.0565 | 337.7565  | 295.3341 | 323.2028  | -0.28312  | 0.092111 | -0.97787  | 7.95E-10 | 0.111789  | 0.733177 |
| AT1G05880 | ARI12     | 2.377808 | 1.784246 | 2.575309 | 16.90904  | 13.91181 | 11.96209 | 46.24378 | 26.97225 | 24.40615 | 1.919071  | 0        | 0.1035907 | 1.845204  | 0.000397 | 2.897254  | 6.05E-09 | -0.47531  | NA       |
| AT1G05890 | ARI5      | 494.584  | 472.8252 | 485.4457 | 553.0493  | 506.125  | 536.3003 | 589.6802 | 653.8073 | 479.3368 | 491.3171  | 456.3046 | 389.5009  | 0.132879  | 0.429859 | 0.240678  | 0.139072 | -0.19988  | 0.434201 |
| AT1G05894 | AT1G05894 | 5.94452  | 1.784246 | 2.575309 | 4.948987  | 7.949607 | 10.96525 | 6.225124 | 4.67334  | 4.88123  | 3.838143  | 5.321336 | 6.215439  | 0.759845  | 0.215695 | 0.453239  | 0.532784 | 0.308149  | NA       |
| AT1G05900 | NTH2      | 252.0476 | 244.4417 | 261.3938 | 232.19    | 246.4378 | 217.3113 | 206.3184 | 209.3046 | 171.8193 | 292.6584  | 268.7275 | 252.7612  | -0.11971  | 0.499651 | -0.36398  | 0.026801 | -0.101281 | 0.794251 |
| AT1G05910 | AT1G05910 | 273.4479 | 187.3458 | 208.8877 | 207.445   | 205.3649 | 229.2734 | 216.1007 | 262.1703 | 195.2492 | 182.3118  | 220.8354 | 247.5817  | -0.07309  | 0.771372 | -0.0045   | 0.98745  | 0.05227   | 0.914481 |
| AT1G05920 | AT1G05920 | 0        | 0        | 0        | 0         | 0        | 0        | 0        | 1.07889  | 0        | 0         | 0        | 0         | 0         | NA       | 0         | NA       | 0.38345   | NA       |
| AT1G05925 | AT1G05925 | 0        | 0        | 0        | 0         | 0        | 0        | 0        | 0        | 0        | 0         | 0        | 0         | #N/A      | #N/A     | #N/A      | #N/A     | #N/A      | #N/A     |
| AT1G05930 | AT1G05930 | 2.377808 | 0        | 0        | 0         | 0        | 0        | 0.889303 | 0        | 0.976246 | 0         | 0        | 0         | -0.45106  | NA       | -0.06974  | NA       | -0.40631  | NA       |
| AT1G05940 | CAT9      | 452.9724 | 431.7875 | 391.4469 | 360.8636  | 319.9717 | 387.7711 | 412.6368 | 432.6349 | 316.3037 | 420.2766  | 391.1182 | 405.0395  | -0.25437  | 0.12961  | -0.13399  | 0.490872 | -0.06693  | 0.854642 |
| AT1G05950 | AT1G05950 | 66.57862 | 51.74313 | 59.2321  | 75.05963  | 72.8714  | 74.76306 | 64.02985 | 43.1556  | 41.97858 | 62.36982  | 50.55269 | 76.65708  | 0.303125  | 0.283239 | -0.24308  | 0.45644  | 0.088124  | 0.887406 |
| AT1G05960 | AT1G05960 | 72.8536  | 77.9313  | 69.2758  | 420.2515  | 398.1428 | 487.4551 | 632.2948 | 694.8051 | 442.2394 | 625.6172  | 740.996  | 678.5188  | -0.73465  | 1.77E-05 | -0.30304  | 0.121227 | -0.09899  | 0.793302 |
| AT1G05970 | AT1G05970 | 54.68958 | 62.44861 | 65.67037 | 55.6761   | 64.92179 | 59.81045 | 43.57587 | 45.31338 | 71.26596 | 69.08657  | 74.4987  | 53.86714  | -0.18555  | 0.959763 | -0.17853  | 0.603959 | 0.104364  | 0.866496 |
| AT1G05980 | AT1G05980 | 0        | 0        | 0        | 0         | 0        | 0        | 0        | 0        | 0        | 0         | 0        | 0         | #N/A      | #N/A     | #N/A      | #N/A     | #N/A      | #N/A     |
| AT1G05990 | CM17      | 0        | 0        | 0        | 0.412416  | 0        | 0        | 0.889303 | 0        | 0        | 0         | 0        | 0         | 0.066991  | NA       | 0.136991  | NA       | 0         | NA       |
| AT1G06000 | UG789C1   | 87.97889 | 64.23286 | 47.64321 | 135.2723  | 145.0803 | 131.583  | 104.845  | 133.7824 | 173.7718 | 86.35821  | 99.77505 | 59.04667  | 0.984165  | 0.00023  | 0.979671  | 0.000344 | 0.262285  | 0.624333 |
| AT1G06002 | AT1G06002 | 0        | 0        | 0        | 0.824831  | 0.662467 | 0        | 0        | 1.07889  | 2.876234 | 0.995936  | 0        | 0.2071813 | #N/A      | #N/A     | #N/A      | #N/A     | #N/A      | #N/A     |
| AT1G06010 | AT1G06010 | 65.38972 | 57.09587 | 86.27284 | 102.2791  | 96.72022 | 87.72199 | 88.93035 | 70.12785 | 149.3656 | 118.0229  | 131.7031 | 108.7702  | 0.427213  | 0.149909 | 0.524397  | 0.084057 | 0.726556  | 0.056075 |
| AT1G06020 | AT1G06020 | 1.188904 | 5.352738 | 3.826963 | 8.660727  | 7.28714  | 6.977885 | 8.003731 | 7.55223  | 8.786214 | 2.878607  | 3.991002 | 2.071813  | 0.878974  | 0.141736 | 0.917572  | 0.145695 | -0.12237  | NA       |
| AT1G06030 | AT1G06030 | 0        | 0        | 0        | 0         | 0        | 0        | 0        | 1.07889  | 2.876234 | 0.995936  | 0        | 0.2071813 | 0.237015  | NA       | 0.609647  | NA       | 0.488477  | NA       |
| AT1G06040 | BBX24     | 3321.798 | 3374.009 | 3189.52  | 2115.279  | 2215.291 | 1909.947 | 1637.208 | 1430.608 | 1689.882 | 2959.208  | 3271.291 | 2742.045  | -0.65646  | 5.68E-09 | -1.04452  | 3.64E-21 | -0.13882  | 0.515143 |
| AT1G06050 | AT1G06050 | 84.41218 | 107.0548 | 86.27284 | 129.0861  | 125.8688 | 138.5609 | 120.9453 | 116.5201 | 88.83389 | 87.31774  | 69.17737 | 72.51346  | -0.499472 | 0.01839  | 0.239195  | 0.345573 | -0.24845  | 0.54048  |
| AT1G06060 | AT1G06060 | 183.0912 | 249.7944 | 207.3123 | 195.8974  | 202.715  | 194.384  | 208.097  | 194.2002 | 116.7266 | 83.212481 | 188.9074 | 217.5404  | -0.09597  | 0.630571 | -0.03441  | 0.884588 | 0.02085   | 0.980729 |
| AT1G06070 | AT1G06070 | 215.1916 | 183.7773 | 230.4091 | 226.4162  | 225.9013 | 249.2102 | 204.5398 | 179.9597 | 166.9381 | 201.5025  | 208.8624 | 170.9246  | 0.14229   | 0.457105 | -0.19525  | 0.327696 | -0.12302  | 0.720991 |
| AT1G06080 | ADS1      | 351.9156 | 281.9109 | 374.4704 | 62        |          |          |          |          |          |           |          |           |           |          |           |          |           |          |

|           |            |          |          |          |          |          |          |          |          |          |          |          |          |           |           |          |           |          |          |
|-----------|------------|----------|----------|----------|----------|----------|----------|----------|----------|----------|----------|----------|----------|-----------|-----------|----------|-----------|----------|----------|
| AT1G06540 | AT1G06540  | 1.188904 | 0        | 0        | 1.237247 | 0.662467 | 2.990522 | 0.889303 | 2.15778  | 1.952492 | 0        | 0        | 1.035907 | 0.519644  | 0.443179  | 0.539976 | 0.438321  | -0.07697 | NA       |
| AT1G06550 | AT1G06550  | 326.9486 | 297.9691 | 321.9136 | 249.5114 | 235.1759 | 242.2323 | 247.2264 | 236.2769 | 182.558  | 388.6119 | 369.8328 | 414.3626 | -0.3776   | 0.014049  | -0.52003 | 0.001337  | 0.302981 | 1.186053 |
| AT1G06560 | AT1G06560  | 95.11232 | 99.91778 | 75.97161 | 93.61834 | 78.17114 | 76.75674 | 71.14428 | 75.5223  | 76.14719 | 80.60099 | 86.47171 | 62.15439 | -0.10662  | 0.717815  | -0.56201 | 0.031953  | -0.23229 | 0.588675 |
| AT1G06570 | PSD1       | 376.8826 | 413.9451 | 347.6667 | 286.6288 | 237.1633 | 299.0522 | 290.8022 | 312.8781 | 194.273  | 313.7682 | 256.7545 | 354.28   | -0.45476  | 0.028452  | -0.49711 | 0.019895  | -0.28643 | 0.405877 |
| AT1G06580 | AT1G06580  | 21.40027 | 44.60615 | 33.47901 | 39.17948 | 21.19895 | 36.88311 | 30.23632 | 28.05114 | 26.35864 | 25.90746 | 15.96401 | 30.04129 | 0.004681  | 0.992684  | -0.18157 | 0.706407  | -0.37632 | 0.588209 |
| AT1G06590 | APCS       | 98.67903 | 108.8339 | 84.98519 | 111.7646 | 93.40789 | 161.6462 | 96.04478 | 94.94231 | 69.31347 | 94.03449 | 77.15937 | 71.47755 | 0.120198  | 0.952982  | -0.15487 | 0.589878  | -0.24769 | 0.557232 |
| AT1G06610 | AT1G06610  | 0        | 0        | 0        | 0.412416 | 0        | 0        | 0        | 0        | 0        | 0        | 0        | 0        | 0.095918  | NA        | 0        | NA        | 0        | NA       |
| AT1G06620 | AT1G06620  | 21.40027 | 8.92123  | 19.31482 | 161.2545 | 164.9544 | 186.4092 | 144.0672 | 119.7568 | 155.2231 | 24.94793 | 23.94601 | 20.71813 | 3.095198  | 4.18E-31  | 2.81505  | 2.93E-25  | 0.345528 | 0.756668 |
| AT1G06630 | AT1G06630  | 222.325  | 206.9725 | 199.5864 | 192.1857 | 198.0777 | 207.3429 | 265.0124 | 241.6713 | 204.0354 | 226.4504 | 210.1928 | 204.0736 | -0.0783   | 0.693386  | 0.173187 | 0.365489  | 0.026076 | 0.952456 |
| AT1G06640 | AT1G06640  | 810.8325 | 613.7806 | 663.142  | 470.1538 | 428.6163 | 460.5404 | 438.4266 | 503.8416 | 547.674  | 1005.59  | 1023.027 | 874.3051 | -0.61333  | 2.72E-05  | -0.48391 | 0.001576  | 0.464766 | 0.014764 |
| AT1G06645 | AT1G06645  | 122.4571 | 146.3082 | 91.42346 | 160.8421 | 170.9166 | 204.3524 | 284.5771 | 253.5391 | 187.4392 | 122.8206 | 94.45371 | 147.0987 | 0.555011  | 0.022668  | 0.983651 | 2.31E-05  | 0.031573 | 0.962207 |
| AT1G06650 | AT1G06650  | 521.9288 | 660.171  | 600.0469 | 922.5736 | 802.2479 | 943.0114 | 841.2811 | 918.1353 | 676.5385 | 623.6982 | 584.0166 | 589.4309 | 0.576335  | 0.000123  | 0.446938 | 0.004681  | 0.015943 | 0.970941 |
| AT1G06660 | JASON      | 28.53369 | 30.33218 | 19.31482 | 35.05532 | 34.4483  | 27.91154 | 25.7898  | 14.02557 | 17.57243 | 20.15025 | 14.63367 | 22.78994 | 0.325046  | 0.414402  | -0.37826 | 0.392288  | -0.37094 | 0.959534 |
| AT1G06670 | NIH        | 562.3516 | 501.3731 | 382.4333 | 285.804  | 292.1481 | 359.8595 | 361.0572 | 359.2703 | 241.1328 | 422.1957 | 396.4395 | 393.6445 | -0.61302  | 0.001941  | -0.5733  | 0.005127  | -0.24723 | 0.482584 |
| AT1G06680 | PSBP1      | 37326.83 | 43740.79 | 42410.18 | 17749.95 | 16794.87 | 15946.46 | 20157.84 | 19643.35 | 26412.34 | 41906.76 | 35946.95 | 48665.85 | -1.26885  | 5.84E-18  | -0.88427 | 0.405E-09 | 0.034606 | 0.931611 |
| AT1G06690 | AT1G06690  | 317.4374 | 342.5752 | 305.1741 | 222.7044 | 235.8383 | 216.3144 | 348.607  | 331.2192 | 384.6409 | 400.1264 | 379.1452 | 350.1364 | -0.50446  | 0.000214  | 0.14425  | 0.382914  | 0.28355  | 0.30711  |
| AT1G06700 | PT11       | 703.8311 | 856.4381 | 764.8667 | 808.7469 | 769.787  | 743.6432 | 793.2587 | 822.1141 | 672.6335 | 774.3453 | 818.1554 | 755.1759 | 0.003502  | 0.984711  | -0.01958 | 0.915695  | 0.016568 | 0.962641 |
| AT1G06710 | AT1G06710  | 72.52314 | 92.78079 | 88.84815 | 50.3147  | 43.72284 | 62.80097 | 72.03358 | 80.91675 | 71.23987 | 76.76285 | 94.45371 | 74.58527 | -0.6592   | 0.032984  | -0.43179 | 2.21075   | -0.04369 | 0.957254 |
| AT1G06720 | AT1G06720  | 140.1719 | 355.065  | 348.9543 | 265.5956 | 289.4982 | 292.0743 | 348.607  | 334.4559 | 278.2301 | 305.1323 | 313.9588 | 269.3357 | -0.396    | 0.00892   | -0.21221 | 0.219826  | -0.32629 | 0.151208 |
| AT1G06730 | AT1G06730  | 127.2127 | 114.1917 | 112.0259 | 87.01969 | 108.6446 | 107.6588 | 98.71269 | 88.46897 | 135.6982 | 115.1443 | 123.7211 | 122.237  | -0.22828  | 0.340646  | -0.12772 | 0.64778   | 0.02563  | 0.963536 |
| AT1G06740 | AT1G06740  | 47.55616 | 35.68492 | 46.35556 | 28.45667 | 17.88662 | 16.94629 | 28.85771 | 31.28781 | 15.52492 | 43.1791  | 26.60668 | 20.00538 | -0.92302  | 0.006619  | -0.66582 | 0.007387  | -0.35906 | 0.565684 |
| AT1G06750 | AT1G06750  | 4.755616 | 1.784246 | 0        | 2.474493 | 1.987402 | 1.993682 | 3.535821 | 2.15778  | 2.928738 | 2.878607 | 5.321336 | 2.071813 | -0.05691  | 0.947998  | 0.357093 | 0.65596   | 0.302198 | NA       |
| AT1G06760 | AT1G06760  | 1224.571 | 1379.222 | 1309.544 | 1707.813 | 1485.914 | 1542.113 | 1225.46  | 1342.139 | 1532.706 | 1369.257 | 1229.229 | 1274.165 | 0.274701  | 0.034699  | 0.067641 | 0.682329  | -0.0129  | 0.971051 |
| AT1G06770 | DRIP1      | 80.84547 | 74.98383 | 73.3963  | 108.8777 | 110.632  | 92.70619 | 102.2699 | 87.39009 | 81.02842 | 65.24842 | 43.90102 | 58.01077 | 0.439907  | 0.05438   | 0.232556 | 0.391843  | -0.4237  | 0.264008 |
| AT1G06780 | GAUT6      | 117.7015 | 121.3287 | 105.5877 | 150.5317 | 129.1811 | 150.523  | 168.9677 | 153.2024 | 114.2208 | 104.5894 | 111.7481 | 95.3034  | 0.314916  | 0.146565  | 0.335986 | 0.142316  | -0.14122 | 0.747104 |
| AT1G06790 | AT1G06790  | 47.55616 | 32.11643 | 46.35556 | 82.89553 | 104.0074 | 102.7646 | 55.13682 | 48.55005 | 73.9147  | 60.45074 | 43.90102 | 65.26211 | 1.112748  | 2.04E-05  | 0.44621  | 0.152377  | 0.390796 | 0.421848 |
| AT1G06800 | LA-[gamma] | 40.42273 | 32.11643 | 39.91728 | 58.56301 | 35.11077 | 53.8294  | 33.79353 | 64.7334  | 43.91307 | 39.34096 | 25.27635 | 32.1131  | 0.357451  | 0.328538  | 0.295948 | 0.465047  | -0.19723 | 0.786409 |
| AT1G06810 | AT1G06810  | 1.188904 | 0        | 0        | 1.237247 | 1.324935 | 0.996841 | 1.778607 | 1.07889  | 0        | 0        | 0        | 1.035907 | 0.390086  | NA        | 0.251983 | NA        | -0.0632  | NA       |
| AT1G06820 | CRISO      | 315.0595 | 278.3424 | 285.8593 | 237.9638 | 194.1029 | 255.1912 | 279.2413 | 250.3025 | 175.7243 | 309.93   | 284.6915 | 305.5924 | -0.35194  | 0.1078037 | -0.31174 | 0.145433  | 0.032371 | 0.949285 |
| AT1G06830 | GRXS11     | 32.10041 | 33.90067 | 33.47901 | 43.30364 | 41.07297 | 25.91786 | 48.02239 | 34.52448 | 53.69353 | 45.09817 | 54.54369 | 47.6517  | -0.169495 | 0.651592  | 0.430184 | 0.223335  | 0.524095 | 0.290109 |
| AT1G06840 | AT1G06840  | 219.9472 | 221.2465 | 173.8333 | 157.5427 | 160.3171 | 177.3747 | 231.2189 | 291.3003 | 199.1542 | 161.202  | 175.6041 | 155.386  | -0.30746  | 0.123839  | 0.226613 | 0.297617  | -0.31328 | 0.311768 |
| AT1G06850 | AtbZP52    | 110.5681 | 94.56504 | 90.1358  | 65.16166 | 88.10815 | 74.76306 | 82.70522 | 83.07453 | 91.76712 | 109.3871 | 142.3457 | 92.19568 | -0.37207  | 0.128352  | -0.19436 | 0.497426  | 0.199192 | 0.652681 |
| AT1G06860 | AT1G06860  | 0        | 0        | 0        | 0        | 0        | 0        | 0        | 0        | 0        | 0        | 0        | 0        | 0.00909   | NA        | 0        | NA        | 0.172362 | NA       |
| AT1G06870 | TPP2       | 116.5126 | 148.0924 | 101.7247 | 165.7911 | 186.1533 | 159.4945 | 183.1965 | 167.2279 | 155.2231 | 124.7396 | 117.0694 | 134.6678 | 0.488498  | 0.009655  | 0.471263 | 0.017832  | 0.057031 | 0.903731 |
| AT1G06880 | AT1G06880  | 0        | 0        | 0        | 0        | 0        | 0        | 0        | 0        | 0        | 0        | 0        | 0        | #N/A      | #N/A      | #N/A     | #N/A      | #N/A     | #N/A     |
| AT1G06890 | AT1G06890  | 517.1732 | 497.4006 | 484.158  | 653.2663 | 626.0316 | 743.6432 | 674.092  | 624.6773 | 560.3652 | 520.0683 | 625.257  | 520.0251 | 0.423619  | 0.002328  | 0.306435 | 0.041589  | 0.14603  | 0.579215 |
| AT1G06900 | AT1G06900  | 506.4731 | 412.1608 | 424.9259 | 255.2852 | 262.337  | 276.1249 | 393.0721 | 359.2703 | 268.4676 | 404.924  | 404.4215 | 456.8348 | -0.75092  | 3.73E-06  | -0.39142 | 0.028444  | -0.08644 | 0.814993 |
| AT1G06910 | TRFL7      | 70.14533 | 73.15409 | 82.40988 | 72.99756 | 66.24673 | 68.78201 | 69.36567 | 69.04896 | 75.17094 | 74.84378 | 75.82904 | 60.08258 | -0.10988  | 0.687035  | -0.07751 | 0.803953  | -0.09975 | 0.850046 |
| AT1G06920 | OPF4       | 0        | 1.784246 | 0        | 0        | 0.662467 | 0        | 0        | 0        | 0        | 0        | 0        | 0        | -0.12017  | NA        | -0.24312 | NA        | -0.23848 | NA       |
| AT1G06923 | AT1G06923  | 0        | 0        | 0        | 0        | 0        | 0        | 0        | 0        | 0        | 0        | 0        | 0        | #N/A      | #N/A      | #N/A     | #N/A      | #N/A     | #N/A     |
| AT1G06925 | AT1G06925  | 0        | 0        | 0        | 0        | 0        | 0        | 0        | 0        | 0        | 0        | 0        | 0        | #N/A      | #N/A      | #N/A     | #N/A      | #N/A     | #N/A     |
| AT1G06930 | AT1G06930  | 0        | 0        | 0        | 0        | 0        | 0        | 0        | 0        | 0        | 0        | 0        | 0        | #N/A      | #N/A      | #N/A     | #N/A      | #N/A     | #N/A     |
| AT1G06950 | TIC10      | 1778.6   | 1372.085 | 1381.653 | 814.1083 | 911.555  | 1003.819 | 1218.346 | 1375.585 | 1109.992 | 1388.448 | 1395.52  | 1482.382 | -0.72489  | 4.11E-07  | -0.2888  | 0.07515   | -0.08735 | 0.783036 |
| AT1G06960 | AT1G06960  | 162.8798 | 146.3082 | 154.5185 | 152.5938 | 175.5538 | 144.5419 | 181.4179 | 142.4135 | 173.7718 | 148.728  | 131.7031 | 231.0072 | 0.025487  | 0.934451  | 0.097618 | 0.745321  | 0.138754 | 0.768975 |
| AT1G06970 | CHK14      | 0        | 0        | 0        | 0.412416 | 0.662467 | 0        | 0.889303 | 0        | 0.972646 | 0        | 0        | 0.271813 | 0.18143   | NA        | 0.321425 | NA        | 0.35261  | NA       |
| AT1G06980 | AT1G06980  | 22.58917 | 19.62671 | 28.3284  | 82.84831 | 2.649869 | 2.990522 | 3.557214 | 2.15778  | 5.874766 | 18.23118 | 27.93701 | 23.82585 | -2.81265  | 1.32E-09  | -2.11421 | 8.01E-06  | -0.01694 | NA       |
| AT1G06990 | AT1G06990  | 0        | 1.784246 | 0        | 0.412416 | 0.662467 | 0        | 0.889303 | 0        | 0        | 1.919071 | 0        | 1.035907 | -0.08744  | NA        | -0.1148  | NA        | 0.258179 | NA       |
| AT1G07000 | ATEXO70B2  | 198.547  | 264.0684 | 251.0926 | 545.2134 | 439.8783 | 598.1045 | 375.2861 | 486.5794 | 400.2609 | 117.0633 | 91.79304 | 116.0215 | 1.128774  | 1.94E-10  | 0.808071 | 1.29E-05  | -1.08661 | 7.82E-07 |
| AT1G07010 | AT1G07010  | 481.5061 | 478.1779 | 473.8568 | 411.1783 | 381.5811 | 347.8974 | 294.3595 | 315.0359 | 278.2301 | 593.9526 | 623.9266 | 545.9227 | -0.31958  | 0.014926  | -0.68451 | 8.78E-08  | 0.294719 | 0.114482 |
| AT1G07020 | AT1G07020  | 30.9115  | 32.11643 | 42.49259 | 70.52306 | 64.25933 | 65.79149 | 61.36194 | 33.44559 | 77.12343 | 30.70514 | 25.27635 | 43.50807 | 0.861357  | 0.007672  | 0.653134 | 0.064253  | -0.07438 | 0.931744 |
| AT1G07025 | AT1G07025  | 0        | 0        | 0        | 0.412416 | 0        | 0        | 0        | 0        | 0        | 0        | 0        | 0        | 0.095918  | NA        | 0        | NA        | 0        | NA       |
| AT1G07030 | AT1G07030  | 124.8349 | 126.6815 | 119.7519 | 132.7978 | 147.0677 | 133.5767 | 129.8383 | 119.7568 | 132.7695 | 82.52006 | 77.15937 | 101.5188 | 0.154299  | 0.467732  | 0.044    |           |          |          |

|          |            |          |          |          |          |          |          |          |          |          |          |          |          |          |          |          |          |          |          |    |
|----------|------------|----------|----------|----------|----------|----------|----------|----------|----------|----------|----------|----------|----------|----------|----------|----------|----------|----------|----------|----|
| ATI07490 | RTFL3      | 4.755616 | 0        | 1.287654 | 0.824831 | 1.324935 | 0        | 0        | 0        | 0.976246 | 0.959536 | 5.321336 | 1.035907 | -0.54827 | 0.430098 | -0.74598 | 0.271222 | 0.06741  | NA       |    |
| ATI07500 | ATI07500   | 0        | 0        | 2.575309 | 0.824831 | 1.324935 | 0.996841 | 0        | 0.889303 | 0        | 0.976246 | 0        | 0        | 1.035907 | 0.097781 | NA       | -0.12218 | NA       | -0.269   | NA |
| ATI07510 | FTSH10     | 233.0252 | 228.3835 | 197.0111 | 163.729  | 163.6294 | 173.4503 | 176.0821 | 197.4369 | 182.558  | 165.0401 | 195.5591 | 177.14   | -0.39031 | 0.014079 | -0.23979 | 0.18362  | -0.29092 | 0.251311 |    |
| ATI07520 | SCL31      | 83.22328 | 107.0548 | 72.10864 | 100.217  | 86.78321 | 128.5925 | 129.8383 | 157.5179 | 164.0093 | 79.64146 | 82.48071 | 71.47755 | 0.258754 | 0.311078 | 0.771229 | 0.000715 | -0.14847 | 0.768192 |    |
| ATI07530 | SCL14      | 435.1388 | 401.4554 | 333.5025 | 307.2496 | 288.1733 | 353.8785 | 375.2861 | 469.3171 | 344.6148 | 331.9993 | 325.9318 | 285.9102 | -0.29968 | 0.101723 | 0.021639 | 0.930978 | -0.30409 | 0.274581 |    |
| ATI07540 | TRPS       | 0        | 1.784246 | 0        | 0        | 0        | 0        | 0        | 1.07889  | 0        | 0        | 1.330334 | 2.071813 | -0.34462 | NA       | -0.0863  | NA       | 0.280374 | NA       |    |
| ATI07550 | ATI07550   | 0        | 0        | 0        | 0.412416 | 0        | 0        | 0        | 0        | 0        | 0        | 0        | 0        | 0.065109 | NA       | 0        | NA       | 0.150531 | NA       |    |
| ATI07560 | ATI07560   | 1.188904 | 0        | 0        | 0.412416 | 1.324935 | 0.996841 | 0        | 1.07889  | 0        | 0        | 0        | 0        | 0.254747 | NA       | -0.06294 | NA       | -0.04861 | NA       |    |
| ATI07570 | APK1A      | 93.92341 | 108.839  | 127.4778 | 91.14384 | 90.09555 | 112.643  | 79.14801 | 75.5223  | 59.55101 | 112.2657 | 78.4897  | 120.1652 | -0.17113 | 0.526673 | -0.59849 | 0.016114 | -0.0718  | 0.896855 |    |
| ATI07580 | ATI07580   | 0        | 0        | 0        | 0        | 0        | 0        | 0        | 0        | 0        | 0        | 0        | 0        | #N/A     | #N/A     | #N/A     | #N/A     | #N/A     | #N/A     |    |
| ATI07590 | ATI07590   | 1225.76  | 947.4346 | 1165.327 | 3136.833 | 3142.082 | 1863.095 | 2265.945 | 1423.056 | 4275.957 | 1063.165 | 1234.55  | 1798.334 | 1.132964 | 0.005175 | 1.104635 | 0.007691 | 0.258115 | 0.757485 |    |
| ATI07600 | MT1A       | 0        | 0        | 0        | 0        | 0        | 0        | 0        | 0        | 0        | 0        | 0        | 0        | #N/A     | #N/A     | #N/A     | #N/A     | #N/A     | #N/A     |    |
| ATI07610 | MT1C       | 38.04493 | 28.54794 | 37.34198 | 170.74   | 185.4908 | 131.583  | 127.1704 | 93.86342 | 189.3917 | 47.01725 | 71.83803 | 79.7648  | 2.067578 | 6.77E-13 | 1.825266 | 5.21E-10 | 0.828352 | 0.059515 |    |
| ATI07615 | ATOBGM     | 53.50068 | 57.09587 | 52.79383 | 56.08852 | 51.67245 | 55.82308 | 52.46891 | 53.9445  | 72.2422  | 40.3005  | 39.91002 | 42.47217 | 0.007533 | 0.982718 | 0.128582 | 0.701759 | -0.38723 | 0.391657 |    |
| ATI07620 | TRM32      | 53.50068 | 37.46917 | 46.35556 | 144.3455 | 143.0929 | 160.4914 | 108.495  | 98.17898 | 81.02823 | 17.27164 | 15.96401 | 22.78994 | 1.627826 | 3.47E-13 | 1.007104 | 3.37E-05 | -1.19281 | 0.000761 |    |
| ATI07630 | PLLS       | 186.6579 | 190.9143 | 186.7099 | 341.8925 | 355.0825 | 323.9733 | 328.153  | 264.328  | 232.3465 | 135.2945 | 147.6671 | 139.8474 | 0.843561 | 1.2E-07  | 0.540701 | 0.001695 | -0.4091  | 0.117114 |    |
| ATI07640 | DOF1.1     | 165.2576 | 178.4246 | 175.121  | 198.3719 | 180.1911 | 196.3776 | 141.3993 | 187.7268 | 171.8193 | 159.2829 | 156.9794 | 145.0269 | 0.149233 | 0.442983 | -0.05121 | 0.831607 | -0.16381 | 0.621592 |    |
| ATI07645 | ATDSI-1VOC | 0        | 0        | 0        | 0        | 0        | 0        | 0        | 0        | 0        | 0        | 0        | 0        | #N/A     | #N/A     | #N/A     | #N/A     | #N/A     | #N/A     |    |
| ATI07650 | ATI07650   | 959.4455 | 1074.116 | 981.1926 | 1060.32  | 1008.938 | 1338.757 | 904.4216 | 947.2654 | 700.9446 | 677.4322 | 630.5783 | 797.0649 | 0.172948 | 0.365088 | -0.23469 | 0.224729 | -0.50581 | 0.021612 |    |
| ATI07660 | ATI07660   | 208.0582 | 221.2465 | 230.4901 | 409.5287 | 372.9691 | 324.9701 | 233.8868 | 212.5413 | 410.0233 | 297.456  | 284.6915 | 261.0484 | 0.724319 | 0.001491 | 0.363246 | 0.163001 | 0.341047 | 0.379696 |    |
| ATI07670 | ECA4       | 482.695  | 401.4554 | 387.584  | 438.3978 | 361.7071 | 485.4615 | 369.9502 | 473.6327 | 304.5888 | 338.7161 | 308.6375 | 355.3159 | 0.011523 | 0.965336 | -0.14736 | 0.536429 | -0.33501 | 0.274581 |    |
| ATI07680 | ATI07680   | 0        | 0        | 0        | 0        | 0        | 0        | 0        | 0        | 0        | 0        | 0        | 0        | #N/A     | #N/A     | #N/A     | #N/A     | #N/A     | #N/A     |    |
| ATI07690 | ATI07690   | 0        | 0        | 1.287654 | 0        | 0        | 0        | 0        | 0        | 0        | 0        | 0        | 0        | -0.2184  | NA       | -0.20558 | NA       | -0.19918 | NA       |    |
| ATI07700 | ATI07700   | 620.6079 | 661.9553 | 728.8124 | 794.7248 | 785.6862 | 735.6685 | 594.0547 | 596.6261 | 589.6526 | 732.1257 | 746.3174 | 718.9191 | 0.204372 | 0.077298 | -0.17452 | 0.168604 | 0.12623  | 0.533947 |    |
| ATI07702 | ATI07702   | 0        | 0        | 0        | 0        | 0        | 0        | 0        | 0        | 0        | 0        | 0        | 0        | #N/A     | #N/A     | #N/A     | #N/A     | #N/A     | #N/A     |    |
| ATI07705 | ATI07705   | 205.6804 | 174.8561 | 207.3123 | 194.2477 | 201.3901 | 193.3871 | 192.9789 | 207.1469 | 154.2469 | 172.7164 | 159.6401 | 171.9605 | -0.00394 | 0.986682 | -0.09154 | 0.67944  | -0.22152 | 0.463808 |    |
| ATI07710 | ATI07710   | 10.70014 | 7.136984 | 14.1642  | 3.71174  | 6.624673 | 2.990522 | 7.114428 | 2.15778  | 4.88123  | 4.797678 | 5.321336 | 9.323159 | -0.87351 | 0.083749 | -0.88349 | 0.146802 | -0.56761 | NA       |    |
| ATI07720 | KCS3       | 343.5932 | 390.7499 | 360.5432 | 251.9859 | 280.2237 | 339.9227 | 287.245  | 304.247  | 375.8547 | 356.9473 | 429.6979 | 316.9874 | -0.32639 | 0.087223 | -0.17247 | 0.433995 | 0.010537 | 0.984303 |    |
| ATI07725 | ATEX07H6   | 0        | 0        | 0.412416 | 1.324935 | 0        | 0        | 1.07889  | 1.952492 | 0        | 0        | 0        | 0        | 0.304628 | NA       | 0.848548 | NA       | 0.16846  | NA       |    |
| ATI07728 | ATI07728   | 2.377808 | 1.784246 | 0        | 0.24831  | 2.649869 | 0.996841 | 0        | 1.952492 | 0        | 0        | 0        | 0        | 0.099562 | 0.897221 | -0.30138 | 0.672129 | -0.64918 | NA       |    |
| ATI07730 | DIR25      | 0        | 0        | 0        | 0        | 0        | 0        | 0.889303 | 0        | 0        | 0        | 0        | 0        | 0        | NA       | 0.160764 | NA       | 0        | NA       |    |
| ATI07740 | ATI07740   | 22.58917 | 28.54794 | 12.87654 | 26.3946  | 16.56168 | 24.92102 | 27.56841 | 30.20892 | 17.57243 | 15.35257 | 34.58868 | 22.78994 | 0.098235 | 0.850747 | 0.227769 | 0.662477 | 0.15951  | 0.866061 |    |
| ATI07745 | RA05D1     | 85.25629 | 83.85956 | 82.40988 | 87.84452 | 73.53387 | 73.76622 | 88.93035 | 60.41784 | 54.66978 | 66.20796 | 90.46271 | 80.80071 | 0.083336 | 0.802249 | -0.11495 | 0.745067 | 0.080414 | 0.897378 |    |
| ATI07747 | ATI07747   | 0        | 0        | 0        | 0        | 0        | 0        | 0.889303 | 0        | 0        | 0        | 0        | 0        | 0        | NA       | 0.160764 | NA       | 0        | NA       |    |
| ATI07750 | ATI07750   | 206.8693 | 140.9554 | 119.7519 | 107.6405 | 133.8184 | 124.6051 | 81.81592 | 101.4157 | 124.9595 | 111.3061 | 95.78405 | 116.0215 | -0.35025 | 0.17258  | -0.58629 | 0.021421 | -0.51475 | 0.15612  |    |
| ATI07760 | ATI07760   | 0        | 0        | 0        | 0        | 0        | 0        | 0        | 0        | 0        | 0        | 0        | 0        | #N/A     | #N/A     | #N/A     | #N/A     | #N/A     | #N/A     |    |
| ATI07770 | RPS15AA    | 2210.172 | 2430.143 | 2633.253 | 3395.83  | 3053.312 | 2387.434 | 2230.373 | 2004.578 | 3452.982 | 2642.561 | 2793.701 | 2899.502 | 0.27379  | 0.222853 | 0.077848 | 0.780446 | 0.911229 | 0.620268 |    |
| ATI07780 | PAI1       | 123.646  | 124.8972 | 113.3136 | 128.2612 | 115.2693 | 122.6114 | 160.0746 | 170.4646 | 147.4131 | 154.4852 | 107.7571 | 124.3088 | 0.020552 | 0.930866 | 0.393195 | 0.056911 | 0.104941 | 0.805405 |    |
| ATI07790 | HTB1       | 313.8706 | 333.654  | 320.6259 | 567.8962 | 532.6237 | 413.6889 | 337.9353 | 312.8781 | 410.0233 | 483.606  | 565.3919 | 411.2549 | 0.637189 | 0.003366 | 0.130288 | 0.575317 | 0.578536 | 0.012866 |    |
| ATI07795 | ATI07795   | 0        | 0        | 0        | 0        | 0        | 0        | 0        | 0        | 0        | 0        | 1.330334 | 0        | 0        | NA       | 0        | NA       | 0.172362 | NA       |    |
| ATI07800 | ATI07800   | 0        | 0        | 0        | 0        | 0        | 0        | 0        | 0        | 0        | 0        | 0        | 0        | #N/A     | #N/A     | #N/A     | #N/A     | #N/A     | #N/A     |    |
| ATI07810 | ECA1       | 431.5721 | 371.1232 | 294.8728 | 259.8218 | 194.7654 | 285.0965 | 287.245  | 366.8226 | 212.8216 | 264.8318 | 259.4151 | 285.9102 | -0.55297 | 0.015509 | -0.33077 | 0.19506  | -0.42306 | 0.226435 |    |
| ATI07820 | ATI07820   | 360.2379 | 387.1814 | 405.6111 | 686.2595 | 582.9712 | 461.5373 | 402.8545 | 377.6115 | 701.9209 | 497.0395 | 505.5269 | 556.2818 | 0.568182 | 0.015946 | 0.349645 | 0.18296  | 0.419534 | 0.249951 |    |
| ATI07830 | ATI07830   | 180.7134 | 183.7773 | 176.4086 | 216.9306 | 255.0499 | 222.2955 | 197.8662 | 159.6757 | 282.3151 | 208.2192 | 275.3791 | 160.5655 | 0.346817 | 0.178364 | 0.22538  | 0.438565 | 0.237359 | 0.595848 |    |
| ATI07840 | ATI07840   | 89.1678  | 96.34929 | 103.0123 | 135.2723 | 142.4935 | 116.6304 | 102.2699 | 110.0468 | 136.6744 | 94.03449 | 85.14137 | 123.2799 | 0.409964 | 0.064572 | 0.265965 | 0.292635 | 0.072645 | 0.889374 |    |
| ATI07850 | ATI07850   | 0        | 1.784246 | 1.287654 | 0.824831 | 0        | 0.996841 | 0.889303 | 1.07889  | 0        | 0        | 1.330334 | 1.035907 | -0.18264 | NA       | -0.14127 | NA       | -0.08896 | NA       |    |
| ATI07860 | ATI07860   | 0        | 0        | 0        | 0        | 0        | 0        | 0        | 0        | 0        | 0        | 0        | 0        | #N/A     | #N/A     | #N/A     | #N/A     | #N/A     | #N/A     |    |
| ATI07870 | ATI07870   | 71.33424 | 73.15409 | 68.62963 | 122.4874 | 90.75802 | 130.5861 | 115.6095 | 119.7568 | 112.2683 | 74.84378 | 65.18636 | 65.26211 | 0.878173 | 0.000339 | 0.895207 | 0.000378 | 0.168933 | 0.757455 |    |
| ATI07880 | MPK13      | 65.38972 | 42.8219  | 79.83457 | 37.1174  | 47.69764 | 55.82308 | 61.36194 | 43.1556  | 46.85981 | 80.60099 | 73.16837 | 85.98024 | -0.44542 | 0.12937  | -0.31096 | 0.34909  | 0.317435 | 0.519205 |    |
| ATI07885 | ATI07885   | 1.188904 | 0        | 0        | 0.412416 | 0        | 0        | 0        | 0        | 0.995936 | 0        | 0        | 0        | -0.13119 | NA       | -0.21727 | NA       | -0.03277 | NA       |    |
| ATI07890 | APX1       | 2763.013 | 2861.931 | 2881.77  | 4421.486 | 4129.821 | 4087.047 | 3138.352 | 3725.407 | 5221.94  | 3075.312 | 2567.545 | 2692.321 | 0.537397 | 0.001894 | 0.496557 | 0.005246 | -0.02848 | 0.951197 |    |
| ATI07900 | LD01       | 1.188904 | 3.568492 | 9.01358  | 30.10634 | 36.4357  | 29.90522 | 35.57214 | 18.34113 | 41.00233 | 1.919071 | 1.330334 | 2.071813 | 2.278766 | 7.51E-07 | 2.250929 | 1.53E-06 | -0.72641 | 0.456209 |    |
| ATI07901 | ATI07901   | 4.755616 | 1.784246 | 3.862963 | 4.536571 | 9.274542 | 5.981045 | 7.114428 | 8.63112  | 3.904984 | 1.919071 | 7.982004 | 5.179533 | 0.570389 | 0.382524 | 0.562763 | 0.421512 | 0.254023 | NA       |    |
| ATI07910 | ATRNL      | 191.4135 | 178.4246 | 189.2852 | 106.8156 | 88.10815 | 138.5609 | 112.9415 | 180.1746 | 93.71962 | 136.2541 | 163.6311 | 169.8887 | -0.72643 | 0.003278 | -0.51565 | 0.053871 | -0.24406 | 0.597213 |    |
| ATI07920 | A3         | 3865.127 | 3300.855 | 3207.547 | 2742.976 | 2777.725 | 2829.034 | 2350.429 | 2772.747 | 3179.633 | 2792.249 | 2461.118 | 2847.707 | -0.30964 | 0.031961 | -0.31772 | 0.032344 | -0.35211 | 0.071328 |    |
| ATI07930 | A3         | 3752.181 | 3332.972 | 3271.973 | 2773.907 | 2685.642 | 2805.11  | 2229.484 | 2859.058 | 3158.156 | 2813.358 | 2486.394 | 2759.655 | -0.32163 | 0.028339 | -0.3     |          |          |          |    |

|           |           |          |          |          |          |          |          |          |          |          |          |          |          |           |          |           |          |          |          |
|-----------|-----------|----------|----------|----------|----------|----------|----------|----------|----------|----------|----------|----------|----------|-----------|----------|-----------|----------|----------|----------|
| AT1G08340 | ROPGAPS   | 27.34479 | 8.92123  | 12.87654 | 11.13522 | 10.59948 | 8.971567 | 12.45025 | 7.55223  | 13.66744 | 12.47396 | 22.61568 | 16.5745  | -0.60156  | 0.220098 | -0.48968  | 0.368505 | 0.007283 | NA       |
| AT1G08350 | TMNS      | 102.2457 | 110.6233 | 101.7247 | 122.075  | 127.1937 | 119.6209 | 111.1629 | 91.70564 | 105.4346 | 110.3466 | 102.4357 | 126.3806 | 0.230914  | 0.266898 | -0.01998  | 0.943691 | 0.115187 | 0.912185 |
| AT1G08360 | RP10A0A   | 2426.555 | 2619.273 | 2854.73  | 3236.637 | 3424.956 | 2645.615 | 2655.46  | 2455.554 | 3236.255 | 2553.324 | 2161.793 | 2939.903 | 0.232742  | 0.200585 | 0.078037  | 0.752227 | -0.04416 | 0.874556 |
| AT1G08370 | DCP1      | 240.1586 | 194.4828 | 195.7235 | 240.4383 | 241.1381 | 235.2544 | 228.551  | 230.8824 | 193.2967 | 227.4099 | 232.8084 | 172.9964 | 0.177048  | 0.365337 | 0.043231  | 0.861168 | -0.00232 | 0.996222 |
| AT1G08380 | PSAO      | 12991.15 | 16283.03 | 15523.96 | 9887.663 | 9530.254 | 7390.578 | 7643.563 | 6943.736 | 12288.01 | 15135.71 | 14362.29 | 1908.705 | -0.71802  | 0.00068  | -0.71467  | 0.000854 | 0.079295 | 0.874236 |
| AT1G08390 | AT1G08390 | 45.17835 | 57.09587 | 69.53333 | 54.43886 | 54.32232 | 32.89575 | 42.68657 | 30.20892 | 39.04984 | 77.72239 | 95.78405 | 59.04667 | -0.23477  | 0.497517 | -0.56865  | 0.089503 | 0.409348 | 0.412412 |
| AT1G08400 | MAGZL     | 80.84547 | 69.5856  | 55.36914 | 59.38784 | 59.62205 | 53.8294  | 63.14055 | 52.86561 | 42.95482 | 64.28889 | 65.18636 | 60.08258 | -0.23662  | 0.39789  | -0.3547   | 0.221225 | -0.11672 | 0.83843  |
| AT1G08410 | LSG1-2    | 154.5575 | 144.5239 | 127.4778 | 122.075  | 132.4935 | 128.5925 | 118.2754 | 104.2557 | 123.007  | 133.3755 | 99.77505 | 113.9497 | -0.15426  | 0.475615 | -0.16024  | 0.491057 | -0.28115 | 0.383145 |
| AT1G08420 | BSL2      | 479.1283 | 388.9656 | 327.0642 | 282.9171 | 235.1759 | 317.9922 | 304.1418 | 349.5603 | 258.7052 | 289.7798 | 276.7095 | 269.3357 | -0.50854  | 0.0073   | -0.38307  | 0.060548 | -0.50496 | 0.051388 |
| AT1G08430 | ALMT1     | 4.755616 | 0        | 0        | 0.412416 | 0        | 0.996841 | 1.778607 | 0        | 0        | 1.919071 | 2.660668 | 4.143626 | -0.58913  | 0.381975 | -0.43657  | 0.547784 | 0.369059 | NA       |
| AT1G08440 | ALMT2     | 11.88904 | 1.784246 | 10.30123 | 2.474493 | 1.987402 | 1.993682 | 3.557214 | 1.07889  | 2.928738 | 5.959536 | 17.29434 | 8.287252 | -1.329    | 0.023259 | -1.13939  | 0.069475 | 0.386798 | NA       |
| AT1G08450 | CRT3      | 1417.174 | 1778.893 | 1444.748 | 4137.765 | 3870.134 | 4222.618 | 2337.979 | 2462.027 | 2291.249 | 1094.83  | 1066.928 | 947.8545 | 1.387304  | 4.89E-35 | 0.608199  | 2.91E-07 | -0.56901 | 5.59E-05 |
| AT1G08460 | HDA8      | 203.3026 | 267.6369 | 222.7642 | 308.4868 | 276.9113 | 275.1281 | 253.4515 | 319.3514 | 285.0638 | 219.7337 | 215.5141 | 216.5045 | 0.32051   | 0.054331 | 0.309201  | 0.080048 | -0.07757 | 0.836799 |
| AT1G08465 | YAB2      | 160.502  | 187.3458 | 172.5457 | 224.3541 | 185.4908 | 229.2734 | 222.3259 | 198.5157 | 199.1542 | 160.2424 | 180.9254 | 180.2477 | 0.296375  | 0.091986 | 0.255968  | 0.182288 | 0.060209 | 0.990348 |
| AT1G08470 | SSL3      | 120.0793 | 108.839  | 114.6012 | 151.7689 | 123.2189 | 105.6651 | 83.59453 | 108.9679 | 144.4844 | 104.5894 | 138.3547 | 138.8115 | 0.151513  | 0.000332 | -0.03194  | 0.527543 | 0.139154 | 0.788744 |
| AT1G08480 | SDH6      | 261.5589 | 303.3218 | 361.8309 | 565.0093 | 561.7722 | 506.3951 | 333.4888 | 348.4815 | 630.6549 | 363.664  | 256.7545 | 335.6337 | 0.786587  | 0.001077 | 0.482191  | 0.067699 | 0.045649 | 0.943411 |
| AT1G08490 | NFS2      | 412.5497 | 533.4868 | 448.1037 | 398.3934 | 425.304  | 449.5752 | 576.2687 | 562.1017 | 502.7667 | 411.6408 | 329.9228 | 464.0861 | -0.12607  | 0.508932 | 0.236866  | 0.196797 | -0.19665 | 0.50127  |
| AT1G08500 | ENODL18   | 13.07794 | 12.48972 | 23.17778 | 42.4788  | 44.85784 | 58.29712 | 44.85784 | 58.29712 | 44.85784 | 58.29712 | 44.85784 | 58.29712 | 1.412072  | 2.81E-05 | 1.699462  | 4.24E-07 | 0.237161 | 0.766462 |
| AT1G08510 | FATB      | 1320.872 | 1252.541 | 1201.382 | 988.9725 | 867.8321 | 1093.534 | 723.0037 | 870.6642 | 949.8874 | 1226.287 | 1305.058 | 1050.409 | -0.35174  | 0.022521 | -0.56184  | 0.00018  | -0.07551 | 0.820724 |
| AT1G08520 | CHLD      | 2921.137 | 3086.746 | 2910.099 | 1644.713 | 1509.1   | 1718.554 | 1729.695 | 1998.104 | 1828.509 | 2836.387 | 2825.629 | 2723.398 | -0.86645  | 3.75E-20 | -0.678    | 1.57E-12 | -0.08771 | 0.654266 |
| AT1G08530 | AT1G08530 | 84.41218 | 130.25   | 113.3136 | 104.2213 | 121.894  | 103.6714 | 113.8308 | 101.4157 | 101.5296 | 137.2136 | 134.3637 | 111.8779 | -0.182063 | 0.465866 | -0.03156  | 0.920268 | 0.232905 | 0.561688 |
| AT1G08540 | SIGB      | 114.1234 | 114.27   | 112.2059 | 692.4457 | 568.3969 | 600.0981 | 779.9122 | 919.2142 | 825.9041 | 1056.449 | 1085.553 | 1151.928 | 0.82063   | 8.56E-14 | -0.42646  | 0.000525 | -0.04564 | 0.873894 |
| AT1G08550 | VDE1      | 1376.751 | 1546.941 | 1408.694 | 984.8484 | 965.2148 | 954.9735 | 1671.891 | 1636.676 | 1899.775 | 1592.829 | 1523.232 | 1534.178 | -0.56981  | 1.69E-08 | 0.265892  | 0.015864 | 0.103725 | 0.600891 |
| AT1G08560 | KN        | 287.7148 | 258.7157 | 294.8728 | 474.6903 | 495.5255 | 422.6605 | 362.8358 | 371.1381 | 506.9353 | 374.2189 | 420.3855 | 364.6391 | 0.710557  | 4.59E-05 | 0.578701  | 0.001521 | 0.446869 | 0.080079 |
| AT1G08570 | ACHT4     | 60.98632 | 692.2875 | 709.4975 | 612.0427 | 628.6814 | 641.9655 | 706.9953 | 754.1441 | 705.8259 | 697.5824 | 854.0744 | 628.7993 | -0.078052 | 0.599021 | 0.111325  | 0.525504 | 0.174442 | 0.671946 |
| AT1G08580 | AT1G08580 | 145.0463 | 135.6027 | 144.2163 | 227.241  | 259.6872 | 175.444  | 165.1044 | 118.6779 | 211.8454 | 151.6066 | 154.3187 | 159.5296 | 0.623312  | 0.005693 | 0.212521  | 0.437165 | 0.124205 | 0.80346  |
| AT1G08590 | PXL1      | 33.28931 | 30.33218 | 24.64523 | 90.73143 | 6.624673 | 15.94945 | 12.45025 | 20.49891 | 8.574476 | 22.06932 | 10.64267 | 22.78994 | -1.31695  | 0.002348 | -1.02824  | 0.026829 | -0.59592 | 0.458715 |
| AT1G08592 | AT1G08592 |          |          |          |          |          |          |          |          |          |          |          |          | #N/A      | #N/A     | #N/A      | #N/A     | #N/A     | #N/A     |
| AT1G08600 | ATRX      | 337.6487 | 249.7944 | 265.2568 | 219.4051 | 197.4152 | 273.1344 | 241.0012 | 284.8269 | 158.1519 | 239.8839 | 271.3881 | 240.3303 | -0.30444  | 0.212744 | -0.31276  | 0.224235 | -0.1816  | 0.681964 |
| AT1G08610 | AT1G08610 | 105.8125 | 67.80135 | 114.6012 | 80.42104 | 62.27192 | 79.74726 | 72.03358 | 75.5223  | 80.05217 | 83.4796  | 61.19536 | 95.3034  | -0.3761   | 0.152597 | -0.34465  | 0.22772  | -0.26053 | 0.571976 |
| AT1G08620 | JM16      | 348.3489 | 255.1472 | 242.079  | 213.6313 | 183.5034 | 252.2007 | 242.7799 | 283.7481 | 188.4155 | 232.2076 | 231.4781 | 249.6535 | -0.37954  | 0.080412 | -0.24085  | 0.323156 | -0.2422  | 0.518301 |
| AT1G08630 | THA1      | 13.07794 | 10.70548 | 15.45185 | 14.43455 | 13.91181 | 6.977885 | 19.56648 | 21.5778  | 12.6912  | 23.98839 | 15.96401 | 13.46678 | -0.10754  | 0.851623 | -0.735392 | 0.483789 | 0.376865 | NA       |
| AT1G08640 | CD1       | 733.5537 | 747.5991 | 847.2766 | 679.6067 | 618.1145 | 594.1171 | 853.7131 | 645.1762 | 757.5669 | 790.6574 | 826.1374 | 906.4182 | -0.22035  | 0.164869 | -0.04088  | 0.831127 | 0.131761 | 0.697709 |
| AT1G08650 | PPK1      | 479.1283 | 453.1985 | 445.5286 | 760.9609 | 693.6032 | 553.2466 | 607.3943 | 528.6561 | 697.0367 | 327.2016 | 340.5655 | 407.1113 | 0.536711  | 0.002429 | 0.04349   | 0.024259 | -0.35119 | 0.181131 |
| AT1G08660 | MGP2      | 263.9367 | 258.7157 | 274.2704 | 250.7487 | 231.2011 | 253.1976 | 258.7873 | 231.9613 | 233.3228 | 271.5486 | 324.6015 | 251.7253 | -0.11674  | 0.510457 | -0.13609  | 0.468486 | 0.080943 | 0.806946 |
| AT1G08670 | AT1G08670 |          |          |          |          |          |          |          |          |          |          |          |          | 0.098893  | NA       | 0         | NA       | 0.150283 | NA       |
| AT1G08680 | AGD14     | 448.2168 | 421.0821 | 366.9815 | 296.9392 | 274.9239 | 333.9417 | 401.0759 | 373.2959 | 262.6102 | 365.5831 | 373.8238 | 362.5673 | -0.44272  | 0.013931 | -0.24773  | 0.224232 | -0.16266 | 0.630253 |
| AT1G08695 | SCR13     | 0        | 0        | 0        | 0        | 0        | 0        | 0        | 0        | 0        | 0        | 0        | 0        | #N/A      | #N/A     | #N/A      | #N/A     | #N/A     | #N/A     |
| AT1G08700 | PS1       | 260.37   | 237.3047 | 213.7506 | 241.2631 | 225.2389 | 215.3176 | 164.5211 | 199.5946 | 229.4178 | 189.9881 | 183.5861 | 188.535  | -0.05634  | 0.79437  | -0.25968  | 0.179862 | -0.3333  | 0.211414 |
| AT1G08710 | SKIP24    | 65.38972 | 99.91778 | 82.40988 | 119.1881 | 118.5816 | 114.6367 | 100.4913 | 108.9679 | 113.2445 | 86.35821 | 85.14137 | 88.05205 | 0.519685  | 0.011286 | 0.390968  | 0.085794 | 0.087452 | 0.860565 |
| AT1G08720 | EDR1      | 290.0922 | 315.8115 | 262.6815 | 283.7419 | 251.0751 | 315.0017 | 345.0498 | 358.1915 | 212.109  | 301.2942 | 270.0578 | 283.8384 | -0.03073  | 0.901307 | -0.122558 | 0.596599 | -0.16922 | 0.974426 |
| AT1G08730 | XI-C      | 8.322328 | 7.136984 | 9.01358  | 4.124156 | 1.324935 | 2.990522 | 5.335821 | 6.47334  | 1.952492 | 12.47396 | 14.63367 | 11.39497 | -1.09517  | 0.052597 | -0.62828  | 0.32768  | 0.538446 | NA       |
| AT1G08735 | AT1G08735 | 1.188904 | 0        | 0        | 0        | 0        | 0        | 0        | 1.07889  | 0        | 0.995936 | 0        | 1.035907 | -0.2953   | NA       | -0.04294  | NA       | 0.138959 | NA       |
| AT1G08740 | AT1G08740 | 0        | 0        | 1.287654 | 0.412416 | 0        | 0        | 1.778607 | 0        | 0        | 0        | 1.330334 | 0        | -0.16388  | NA       | 0.083999  | NA       | -0.01814 | NA       |
| AT1G08750 | AT1G08750 | 107.0014 | 146.3082 | 142.9296 | 142.2834 | 147.7302 | 152.5166 | 175.1928 | 160.7546 | 121.0545 | 143.9303 | 141.0154 | 160.5655 | 0.161222  | 0.490599 | 0.210636  | 0.382872 | 0.175258 | 0.65505  |
| AT1G08760 | AT1G08760 | 192.6024 | 183.7773 | 137.779  | 134.8599 | 95.39529 | 156.504  | 160.0746 | 144.5713 | 140.5794 | 146.809  | 159.6401 | 155.386  | -0.40399  | 0.070331 | -0.19805  | 0.448373 | -0.14948 | 0.735019 |
| AT1G08770 | PRA1E     | 98.67903 | 149.8767 | 146.7926 | 143.933  | 190.1281 | 166.4724 | 146.7351 | 139.1768 | 187.4392 | 129.5373 | 115.7391 | 146.0628 | 0.335881  | 0.152653 | 0.261915  | 0.312122 | -0.00077 | 0.998453 |
| AT1G08780 | AIP3      | 101.0568 | 105.2705 | 97.86173 | 179.8132 | 161.642  | 133.5767 | 116.4988 | 107.889  | 188.4155 | 128.5778 | 127.7121 | 116.0215 | 0.629779  | 0.007973 | 0.425631  | 0.106007 | 0.28054  | 0.519335 |
| AT1G08790 | AT1G08790 |          |          |          |          |          |          |          |          |          |          |          |          | #N/A      | #N/A     | #N/A      | #N/A     | #N/A     | #N/A     |
| AT1G08800 | MYOB1     | 297.226  | 312.2431 | 248.5173 | 187.6491 | 200.7276 | 266.1565 | 316.592  | 316.1148 | 247.9665 | 241.803  | 271.3881 | 252.7612 | -0.39063  | 0.041352 | 0.040084  | 0.879133 | -0.15878 | 0.669095 |
| AT1G08810 | MYB60     | 104.6235 | 117.7602 | 146.7926 | 125.2063 | 112.643  | 122.7239 | 134.8612 | 115.197  | 142.0113 | 187.5771 | 134.6678 |          | -0.10918  | 0.671589 | 0.011506  | 0.969758 |          |          |

|          |          |          |          |          |           |          |          |          |          |          |          |          |           |           |          |          |          |          |          |
|----------|----------|----------|----------|----------|-----------|----------|----------|----------|----------|----------|----------|----------|-----------|-----------|----------|----------|----------|----------|----------|
| ATI09300 | ATI09300 | 92.73451 | 83.85956 | 83.69753 | 117.126   | 155.0173 | 127.5956 | 103.1592 | 129.4668 | 104.4583 | 106.5085 | 71.83803 | 80.80071  | 0.593017  | 0.008238 | 0.352777 | 0.16939  | 0.000442 | 0.999221 |
| ATI09310 | ATI09310 | 3901.983 | 6073.573 | 5454.504 | 2687.3    | 2442.517 | 2524.998 | 1410.435 | 1767.222 | 2258.057 | 6753.212 | 6437.486 | 5608.398  | -0.98461  | 1.95-07  | -1.46563 | 2.08E-15 | 0.27817  | 0.405199 |
| ATI09320 | ATI09320 | 63.01191 | 66.0171  | 55.36914 | 69.28582  | 68.8966  | 71.77254 | 74.70149 | 63.65451 | 92.74337 | 47.01725 | 34.58868 | 58.01077  | 0.183348  | 0.534201 | 0.32074  | 0.27308  | -0.36156 | 0.430837 |
| ATI09330 | ECH      | 293.6593 | 303.3218 | 333.5025 | 444.584   | 545.2106 | 369.8279 | 399.2973 | 342.0081 | 427.5957 | 363.664  | 349.8778 | 380.1777  | 0.539665  | 0.001598 | 0.322922 | 0.089795 | 0.228649 | 0.453276 |
| ATI09340 | CSP41B   | 3702.247 | 3845.05  | 3768.964 | 1716.886  | 1440.866 | 1439.438 | 2426.02  | 2664.858 | 4245.694 | 3669.264 | 2954.672 | 4324.91   | -1.26042  | 2.36E-10 | -0.26926 | 0.266831 | -0.04587 | 0.931833 |
| ATI09350 | GOL53    | 24.96698 | 30.33218 | 28.3284  | 11.54764  | 0.0      | 0.662467 | 0.0      | 0.0      | 0.0      | 0.0      | 0.0      | 0.0       | -1.54448  | 0.000169 | -1.66872 | 0.000143 | -0.51376 | NA       |
| ATI09360 | ATI09360 | 0        | 0        | 0        | 0         | 0        | 0        | 0        | 0        | 0        | 0        | 0        | 0         | #N/A      | #N/A     | #N/A     | #N/A     | #N/A     | #N/A     |
| ATI09370 | ATI09370 | 0        | 1.784246 | 1.287654 | 0.0       | 0.0      | 0.0      | 0.0      | 1.07889  | 0.0      | 0.0      | 0.0      | 0.0       | -0.37911  | NA       | -0.28484 | NA       | -0.28118 | NA       |
| ATI09380 | ATI09380 | 0        | 0        | 1.287654 | 7.011065  | 7.949607 | 7.974726 | 4.446517 | 2.15778  | 2.928738 | 0.0      | 0.0      | 0.0       | 1.953263  | 0.001256 | 0.9897   | 0.151824 | -0.13294 | NA       |
| ATI09390 | ATI09390 | 215.1916 | 162.3664 | 172.5457 | 118.3633  | 90.9555  | 110.6493 | 66.69776 | 70.12785 | 51.74104 | 157.3638 | 158.3097 | 169.8887  | -0.76917  | 5.99E-05 | -1.50532 | 4.87E-14 | -0.18218 | 0.626348 |
| ATI09400 | ATI09400 | 8.322328 | 12.48972 | 3.862963 | 5.773818  | 7.28714  | 6.977885 | 3.557214 | 6.47334  | 3.904984 | 10.55489 | 6.65167  | 5.179533  | -0.20016  | 0.767663 | -0.58143 | 0.373495 | -0.05356 | NA       |
| ATI09410 | PCMP-H18 | 11.88904 | 7.136984 | 9.01358  | 11.13522  | 9.274542 | 11.96209 | 19.56468 | 15.10446 | 13.66744 | 6.638812 | 6.65167  | 9.323159  | 0.135018  | 0.821944 | 0.651239 | 0.211467 | -0.16845 | NA       |
| ATI09415 | NIMIN-3  | 158.1242 | 169.5034 | 167.3951 | 339.418   | 371.6441 | 262.1691 | 317.4813 | 256.7758 | 480.313  | 127.6182 | 188.9074 | 180.2477  | 0.039715  | 9.07E-05 | 1.048433 | 1.32E-05 | 0.000892 | 0.998453 |
| ATI09420 | G6PD4    | 34.47821 | 51.74313 | 47.64321 | 85.37002  | 84.13334 | 95.69671 | 67.58706 | 52.86561 | 36.1211  | 38.38143 | 38.57969 | 51.79533  | 0.950508  | 0.000547 | 0.231221 | 0.522629 | -0.03483 | 0.965712 |
| ATI09421 | ATI09421 | 0        | 0        | 0        | 0         | 0        | 0.662467 | 0.996841 | 0.889303 | 0.0      | 0.0      | 0.0      | 0.0       | 0.275488  | NA       | 0.154887 | NA       | 0        | NA       |
| ATI09430 | ACLA-3   | 1053.369 | 1159.76  | 1130.561 | 1163.012  | 1203.703 | 1279.944 | 1166.766 | 1172.753 | 1165.638 | 937.4663 | 956.5101 | 1015.188  | 0.124085  | 0.260413 | 0.069362 | 0.584836 | -0.19761 | 0.205371 |
| ATI09440 | ATI09440 | 105.8125 | 165.9349 | 133.9161 | 68.8734   | 66.90919 | 58.81361 | 71.14428 | 102.945  | 61.5035  | 162.1615 | 121.0604 | 129.4883  | -0.99663  | 2.54E-05 | -0.74811 | 0.002899 | 0.042256 | 0.947214 |
| ATI09450 | ATI09450 | 45.17835 | 26.76369 | 32.19136 | 40.82914  | 45.04777 | 31.8989  | 40.1886  | 33.44559 | 17.57243 | 55.65307 | 21.28534 | 49.72351  | -0.153812 | 0.744238 | -0.18799 | 0.707733 | 0.252786 | 0.739252 |
| ATI09460 | ATI09460 | 24.96698 | 26.76369 | 21.89012 | 23.9201   | 29.14856 | 29.90522 | 23.12189 | 19.42002 | 12.6912  | 22.06932 | 15.96401 | 21.85404  | 0.156129  | 0.722215 | -0.36282 | 0.415553 | -0.2496  | 0.744091 |
| ATI09470 | ATI09470 | 72.52314 | 41.03766 | 59.2321  | 80.83345  | 85.45828 | 79.74726 | 69.36567 | 76.60119 | 66.38473 | 79.64146 | 75.82904 | 72.75052  | 0.461413  | 0.055432 | 0.251988 | 0.379148 | 0.417543 | 0.27328  |
| ATI09480 | ATI09480 | 7.133244 | 14.27397 | 15.45185 | 67.22374  | 62.93439 | 59.81045 | 128.5977 | 106.8101 | 101.5296 | 12.47396 | 17.29434 | 15.40269  | 2.174973  | 6.85E-12 | 2.96751  | 1.06E-21 | 0.201717 | 0.81058  |
| ATI09483 | ATI09483 | 4.755616 | 1.784246 | 0.0      | 4.124156  | 3.974804 | 3.987363 | 4.315524 | 4.13556  | 2.928738 | 2.878607 | 6.65167  | 1.035907  | 0.475291  | 0.508949 | 0.354254 | 0.665543 | 0.297712 | NA       |
| ATI09486 | ATI09486 | 4.755616 | 10.70548 | 19.31482 | 25.56977  | 21.19895 | 13.95577 | 12.45025 | 11.86779 | 15.61994 | 30.70514 | 11.97301 | 21.75404  | 0.701366  | 0.151529 | 0.15597  | 0.810984 | 0.764428 | 0.304878 |
| ATI09490 | ATI09490 | 351.9156 | 396.1026 | 433.9395 | 322.9214  | 309.3722 | 305.0333 | 434.8694 | 358.1915 | 337.7811 | 484.5655 | 573.3739 | 514.8455  | -0.32667  | 0.038235 | -0.05993 | 0.774078 | 0.405063 | 0.049411 |
| ATI09500 | ATI09500 | 32.10041 | 21.41095 | 55.36914 | 288.6909  | 332.5586 | 488.452  | 643.8557 | 471.4749 | 430.5245 | 75.80331 | 70.5077  | 70.44164  | 3.104273  | 1.67E-31 | 3.569389 | 2.78E-41 | 0.867675 | 0.031113 |
| ATI09510 | ATI09510 | 1.188904 | 0.0      | 0.0      | 5.773818  | 6.624673 | 11.96209 | 8.003731 | 5.39445  | 4.88123  | 0.99536  | 1.330334 | 0.0       | 1.901326  | 0.005115 | 1.058668 | 0.012291 | 0.039402 | NA       |
| ATI09520 | ATI09520 | 108.1903 | 105.2705 | 91.42346 | 119.1881  | 133.1559 | 117.6272 | 119.8843 | 81.99564 | 59.3396  | 83.4796  | 77.15937 | 108.7702  | 0.274251  | 0.231516 | -1.53563 | 0.31542  | -0.16555 | 0.709273 |
| ATI09530 | PIF3     | 159.3131 | 140.9554 | 169.9704 | 127.4364  | 115.9318 | 144.5419 | 138.7313 | 134.8612 | 97.6246  | 143.9303 | 125.0514 | 145.0269  | -0.28351  | 0.177511 | -0.33782 | 0.125399 | -0.18045 | 0.632849 |
| ATI09540 | MYB61    | 7.133244 | 1.784246 | 1.287654 | 5.361402  | 1.987402 | 1.936822 | 2.66791  | 5.39445  | 4.88123  | 3.838143 | 0.0      | 0.0       | -0.04987  | 0.954016 | 0.174617 | 0.840144 | -0.61729 | NA       |
| ATI09550 | PAE1     | 0        | 0        | 0        | 0         | 0        | 0        | 0        | 0        | 0        | 0        | 0        | 0         | #N/A      | #N/A     | #N/A     | #N/A     | #N/A     | #N/A     |
| ATI09560 | GLP4     | 205.6804 | 201.6198 | 202.1617 | 528.3044  | 506.7875 | 500.4141 | 360.1679 | 294.537  | 373.9022 | 164.8066 | 195.5591 | 143.991   | 1.313146  | 3.23E-19 | 0.743002 | 2.1E-06  | -0.27852 | 0.311768 |
| ATI09570 | PHYA     | 1561.031 | 1347.106 | 1214.258 | 415.7149  | 459.0898 | 571.1898 | 620.7338 | 741.1974 | 490.0755 | 987.3622 | 1104.177 | 1084.594  | -1.48334  | 1.83E-18 | -1.13032 | 5.26E-11 | -0.36893 | 0.177994 |
| ATI09575 | ATI09575 | 63.01191 | 44.60615 | 73.3963  | 32.58083  | 45.04777 | 38.87679 | 49.80009 | 26.97225 | 49.78855 | 39.34096 | 38.57969 | 49.72351  | -0.62236  | 0.043766 | -0.49005 | 0.149151 | -0.48414 | 0.331363 |
| ATI09580 | ATI09580 | 84.41218 | 67.80135 | 64.38272 | 77.12171  | 84.13334 | 56.81992 | 63.41055 | 62.57562 | 67.36097 | 95.95356 | 107.7571 | 96.33913  | 0.019245  | 0.952281 | -0.16777 | 0.578843 | -0.44252 | 0.217892 |
| ATI09590 | RPL21A   | 1168.693 | 1293.578 | 1344.311 | 1814.629  | 1707.178 | 1377.634 | 1050.267 | 1095.073 | 1600.067 | 1483.442 | 2066.009 | 1456.485  | 0.355515  | 0.09681  | -0.02257 | 0.938725 | 0.383803 | 0.217892 |
| ATI09600 | ATI09600 | 7.133244 | 10.70548 | 6.438272 | 4.948987  | 5.962205 | 5.981045 | 6.225124 | 3.23667  | 1.954297 | 6.762825 | 10.64267 | 6.215499  | -0.38585  | 0.539756 | -0.74456 | 0.240373 | 0.031311 | NA       |
| ATI09610 | GXM1     | 4.755616 | 7.133244 | 7.725926 | 2.062078  | 4.637271 | 3.987363 | 5.57214  | 3.23667  | 6.833722 | 9.595356 | 5.321336 | 11.39497  | -0.66882  | 0.282886 | -0.36112 | 0.617916 | 0.369122 | NA       |
| ATI09620 | ATI09620 | 1544.386 | 1161.544 | 1043     | 6.26871   | 10.67948 | 780.5263 | 754.1294 | 905.1887 | 603.32   | 963.3738 | 957.8405 | 970.6444  | -0.87518  | 1.89E-06 | -0.71249 | 0.000169 | -0.36647 | 0.212111 |
| ATI09625 | ATI09625 | 0        | 0        | 0        | 0.412416  | 0.0      | 0.0      | 0.0      | 0.0      | 0.0      | 0.0      | 0.0      | 0.0       | 0.095918  | NA       | 0        | NA       | 0        | NA       |
| ATI09630 | RABA2A   | 96.3012  | 90.99655 | 132.6284 | 143.1082  | 137.1307 | 152.5166 | 95.15547 | 107.889  | 109.3396 | 89.23681 | 90.46271 | 117.0574  | -0.413648 | 0.05204  | -0.04408 | 0.884334 | -0.11102 | 0.814436 |
| ATI09640 | ATI09640 | 360.5203 | 1702.171 | 1693.265 | 1664.922  | 1454.116 | 1606.907 | 1406.878 | 1649.623 | 1505.317 | 1289.616 | 1210.604 | 1336.319  | -0.17954  | 0.162066 | -0.23093 | 0.076967 | -0.47708 | 0.000759 |
| ATI09645 | ATI09645 | 110.5681 | 117.7602 | 117.1765 | 234.6645  | 221.2641 | 219.305  | 184.0858 | 176.938  | 251.8715 | 106.5085 | 125.0514 | 122.237   | 0.948285  | 2.03E-07 | 0.808674 | 2.09E-05 | 0.030031 | 0.956947 |
| ATI09650 | ATI09650 | 15.45575 | 7.136984 | 5.150617 | 12.848311 | 5.299738 | 8.971567 | 8.893035 | 6.47334  | 7.809968 | 13.4435  | 10.64267 | 14.143626 | -0.26729  | 0.675975 | -0.21909 | 0.757267 | -0.00313 | NA       |
| ATI09660 | ATI09660 | 266.3145 | 283.6951 | 265.2568 | 249.5114  | 239.1507 | 267.1533 | 184.0858 | 225.488  | 192.3205 | 316.6488 | 292.6735 | 268.2998  | -0.40811  | 0.540165 | -0.10314 | 0.006419 | 0.10863  | 0.721971 |
| ATI09665 | ATI09665 | 0        | 0        | 0        | 0         | 0        | 0        | 0        | 0        | 0        | 0        | 0        | 0         | #N/A      | #N/A     | #N/A     | #N/A     | #N/A     | #N/A     |
| ATI09680 | ATI09680 | 27.34479 | 28.54794 | 32.19136 | 51.55195  | 49.68505 | 49.84204 | 39.12935 | 52.86561 | 39.04984 | 28.78607 | 26.60668 | 24.86176  | 0.737729  | 0.012309 | 0.529011 | 0.111076 | -0.12593 | 0.865221 |
| ATI09690 | RPL21A   | 2292.207 | 2346.284 | 2419.503 | 3309.635  | 3083.123 | 2496.089 | 2064.963 | 2217.119 | 3063.46  | 2661.752 | 3462.859 | 2797.984  | 0.326322  | 0.086616 | 0.056312 | 0.821618 | 0.330503 | 0.239343 |
| ATI09700 | DRB1     | 193.7913 | 196.2671 | 177.6963 | 181.8753  | 196.0903 | 178.4345 | 144.0672 | 156.439  | 195.2492 | 189.0285 | 192.8984 | 164.7091  | -0.02544  | 0.913425 | -0.1908  | 0.361492 | -0.05356 | 0.898417 |
| ATI09710 | ATI09710 | 101.0568 | 105.2705 | 112.0259 | 56.08852  | 49.02258 | 68.78201 | 76.4801  | 73.36452 | 48.8123  | 104.5894 | 129.0424 | 99.44703  | -0.8556   | 0.000196 | -0.65345 | 0.008082 | 0.057656 | 0.920546 |
| ATI09720 | NETZB    | 0        | 1.784246 | 1.287654 | 0.0       | 1.324935 | 0.0      | 0.0      | 0.0      | 0.0      | 0.99536  | 0.0      | 1.035907  | -0.23493  | NA       | -0.49511 | NA       | -0.10063 | NA       |
| ATI09730 | ULP2B    | 355.4823 | 424.6506 | 395.3099 | 357.9767  | 346.4704 | 434.6226 | 434.8694 | 419.6882 | 344.6148 | 344.4733 | 363.1812 | 377.07    | -0.04638  | 0.819987 | -0.03272 | 0.883546 | -0.11004 | 0.73288  |
| ATI09740 | ATI09740 | 84.41218 | 98.13353 | 113.3136 | 178.5759  | 19       |          |          |          |          |          |          |           |           |          |          |          |          |          |

|           |           |          |          |          |          |          |          |          |          |          |          |          |          |          |          |           |           |          |          |
|-----------|-----------|----------|----------|----------|----------|----------|----------|----------|----------|----------|----------|----------|----------|----------|----------|-----------|-----------|----------|----------|
| AT1G10210 | MPK1      | 145.0463 | 133.8185 | 151.9432 | 152.5938 | 162.9669 | 193.3871 | 160.0746 | 168.3068 | 179.6293 | 108.4275 | 138.3547 | 117.0574 | 0.218908 | 0.273355 | 0.227369  | 0.285686  | -0.25148 | 0.445542 |
| AT1G10220 | AT1G10220 | 0        | 0        | 2.575309 | 2.062078 | 0.662467 | 0        | 1.778607 | 3.23667  | 3.904984 | 1.919071 | 3.991002 | 1.035907 | -0.01123 | 0.989892 | 0.699676  | 0.331977  | 0.475718 | NA       |
| AT1G10230 | ASK18     | 82.03437 | 78.50683 | 75.97161 | 126.1992 | 157.0047 | 106.662  | 80.03731 | 92.78453 | 104.5794 | 74.84378 | 65.18636 | 72.51346 | 0.696488 | 0.005883 | 0.385644  | 0.181277  | -0.14435 | 8.800274 |
| AT1G10240 | FRS11     | 127.2127 | 117.7602 | 144.2173 | 96.50524 | 74.19633 | 84.73147 | 94.26617 | 114.3623 | 54.66978 | 151.6066 | 155.6491 | 131.5601 | -0.58132 | 0.020542 | -0.54708  | 0.039902  | 0.162137 | 0.748154 |
| AT1G10250 | AT1G10250 | 3.566712 | 10.70548 | 5.150617 | 2.474493 | 3.974804 | 2.990522 | 12.45025 | 4.31556  | 0.972646 | 6.176749 | 5.321336 | 6.215439 | -0.65895 | 0.318627 | -0.02115  | 0.980084  | -0.00713 | NA       |
| AT1G10260 | AT1G10260 | 2.377808 | 1.784246 | 1.287654 | 0.824831 | 1.987402 | 2.990522 | 0        | 2.15778  | 2.928738 | 1.919071 | 2.660668 | 1.035907 | -0.01079 | 0.990376 | -0.06391  | 0.94307   | 0.003881 | NA       |
| AT1G10270 | GRP23     | 107.0014 | 49.95889 | 56.65679 | 46.62096 | 49.68505 | 56.81992 | 54.24751 | 64.7334  | 47.83605 | 58.53167 | 63.85603 | 47.6517  | -0.48441 | 0.116682 | -0.35955  | 0.294093  | -0.33537 | 0.53171  |
| AT1G10280 | AT1G10280 | 49.93397 | 58.88012 | 54.08148 | 56.91335 | 45.04777 | 46.85152 | 66.69776 | 59.33895 | 54.66958 | 52.77446 | 55.87403 | 58.01077 | -0.10044 | 0.753112 | -0.155158 | 0.634467  | 0.039128 | 0.955602 |
| AT1G10290 | DRP24     | 853.633  | 683.3662 | 612.9235 | 594.2908 | 494.2006 | 637.9781 | 698.9925 | 792.9841 | 493.9805 | 655.3628 | 690.4433 | 582.1795 | -0.31031 | 0.146663 | -0.11301  | 0.661858  | -0.15479 | 0.695602 |
| AT1G10300 | AT1G10300 | 1.188904 | 0        | 0        | 0.824831 | 0.662467 | 1.993682 | 0.889303 | 0        | 2.928738 | 0.995936 | 0        | 0        | 0.319962 | NA       | 0.38658   | NA        | -0.06895 | NA       |
| AT1G10310 | AT1G10310 | 166.4466 | 185.5616 | 187.9975 | 284.1543 | 276.9113 | 251.2039 | 259.6766 | 223.3302 | 254.8002 | 261.9532 | 258.0848 | 207.1813 | 0.586357 | 0.000239 | 0.446596  | 0.009323  | 0.422628 | 0.069774 |
| AT1G10320 | AT1G10320 | 224.7028 | 214.1095 | 231.7778 | 208.6823 | 238.4882 | 245.2228 | 253.4515 | 229.8036 | 233.3228 | 228.3695 | 263.4061 | 215.4686 | 0.034987 | 0.864628 | 0.092786  | 0.64798   | 0.067669 | 0.852767 |
| AT1G10330 | PCMP-E71  | 22.58917 | 35.68492 | 29.61605 | 30.10634 | 29.14856 | 24.92102 | 24.9005  | 17.26224 | 21.47741 | 25.90746 | 30.59768 | 29.00538 | -0.017   | 0.969723 | -0.39506  | 0.328857  | -0.01801 | 0.986603 |
| AT1G10340 | AT1G10340 | 59.4452  | 117.7602 | 59.2321  | 426.4377 | 387.5434 | 545.2719 | 408.1903 | 438.0293 | 305.565  | 36.46235 | 41.24035 | 38.32854 | 2.445834 | 1.99E-25 | 2.216004  | 8.86E-21  | -0.92613 | 0.101511 |
| AT1G10350 | AT1G10350 | 127.2127 | 178.4246 | 131.3407 | 179.8132 | 200.7276 | 159.4945 | 126.2811 | 125.1512 | 147.4131 | 149.6876 | 123.7211 | 123.2729 | 0.318868 | 0.122221 | -0.11297  | 0.663737  | -0.11643 | 0.786163 |
| AT1G10360 | GSTU18    | 582.5629 | 699.4244 | 696.621  | 478.4021 | 498.8379 | 441.6005 | 407.301  | 342.0081 | 372.926  | 747.4783 | 772.924  | 641.2261 | -0.4689  | 0.000728 | -0.8028   | 0.406E-09 | 0.127677 | 0.631994 |
| AT1G10370 | GSTU17    | 216.3805 | 196.2671 | 208.6    | 132.3854 | 135.8058 | 127.5956 | 131.6169 | 94.94231 | 153.7026 | 245.6411 | 240.7904 | 281.7666 | -0.63719 | 0.000452 | -0.69124  | 0.000242  | 0.298918 | 0.31024  |
| AT1G10380 | AT1G10380 | 53.50068 | 48.17464 | 39.91728 | 15.25938 | 10.59948 | 15.94945 | 15.11816 | 19.42002 | 21.47741 | 49.89585 | 43.90102 | 37.29264 | -1.63136 | 1.62E-07 | -0.12485  | 0.000155  | -0.09967 | 0.89041  |
| AT1G10385 | EX084A    | 1.188904 | 1.784246 | 0        | 0        | 0        | 0        | 0.889303 | 0        | 0        | 0        | 0        | 1.035907 | -0.53742 | NA       | -0.29348  | NA        | -0.26742 | NA       |
| AT1G10390 | NUP98A    | 740.6872 | 588.8012 | 547.2531 | 528.7168 | 496.8505 | 568.1992 | 498.8993 | 611.7306 | 461.7644 | 435.6292 | 416.3945 | 446.4757 | -0.23547 | 0.174439 | -0.25444  | 0.159436  | -0.52365 | 0.010759 |
| AT1G10400 | UG90A2    | 0        | 1.784246 | 0        | 0.824831 | 1.324935 | 0        | 0.889303 | 4.31556  | 0        | 0.959536 | 0        | 1.035907 | 0.090747 | 0.904379 | 0.48006   | 0.476528  | 0.072039 | NA       |
| AT1G10410 | AT1G10410 | 338.8376 | 308.6746 | 325.7765 | 609.5502 | 619.4069 | 690.8107 | 709.6642 | 618.2039 | 420.762  | 265.9914 | 351.2082 | 327.3465 | 0.952291 | 4.02E-07 | 0.822284  | 1.99E-05  | -0.04724 | 0.925908 |
| AT1G10417 | AT1G10417 | 8.322328 | 3.568492 | 14.1642  | 22.27044 | 29.14856 | 24.92102 | 20.45398 | 18.34113 | 10.73871 | 7.676285 | 3.991002 | 11.39497 | 1.276498 | 0.00461  | 0.715207  | 0.171605  | -0.1652  | NA       |
| AT1G10419 | AT1G10419 | 0        | 0        | 0        | 0        | 0        | 0        | 0.976246 | 0        | 0        | 0        | 0        | 0        | 0.16673  | NA       | 0.16673   | NA        | 0        | NA       |
| AT1G10430 | PP2A2     | 146.2352 | 198.0513 | 189.2852 | 193.8353 | 199.4026 | 201.3618 | 185.8644 | 179.0957 | 225.5128 | 153.5257 | 91.79304 | 161.6014 | 0.157497 | 0.532807 | 0.148851  | 0.583657  | -0.36013 | 0.310425 |
| AT1G10440 | AT1G10440 | 0        | 0        | 0        | 0        | 0        | 0        | 0        | 0        | 0.976246 | 0        | 0        | 0        | 0        | 0        | 0.16673   | NA        | 0        | NA       |
| AT1G10450 | SNL6      | 374.5047 | 274.7739 | 352.8173 | 199.1967 | 173.5664 | 253.1976 | 286.3557 | 311.7992 | 191.3422 | 335.8375 | 325.9318 | 272.4434 | -0.66818 | 0.002208 | -0.33825  | 0.171197  | -0.10284 | 0.836577 |
| AT1G10455 | AT1G10455 | 1.188904 | 0        | 0        | 0        | 0.662467 | 0        | 0        | 0        | 0        | 0.959536 | 0        | 0        | -0.09316 | NA       | -0.21222  | NA        | -0.03317 | NA       |
| AT1G10460 | GLP7      | 11.88904 | 16.05821 | 14.1642  | 5.361402 | 1.324935 | 4.984204 | 2.66791  | 1.07889  | 2.928738 | 10.55489 | 10.64267 | 6.215439 | -1.42139 | 0.007045 | -1.85269  | 0.00084   | -0.49641 | NA       |
| AT1G10470 | ARR4      | 1520.608 | 1555.863 | 1596.691 | 838.8533 | 976.4768 | 806.4442 | 627.8483 | 681.8584 | 908.885  | 1714.69  | 1620.347 | 1348.75  | -0.81851 | 1.96E-07 | -1.05549  | 1.31E-11  | 0.00329  | 0.993998 |
| AT1G10480 | ZFP5      | 2.377808 | 0        | 0.382963 | 2.062078 | 4.637271 | 0.996841 | 1.778607 | 0        | 3.904984 | 2.878607 | 2.660668 | 2.071813 | 0.130169 | 0.87565  | -0.10088  | 0.90916   | 0.095309 | NA       |
| AT1G10490 | AT1G10490 | 287.7148 | 258.7157 | 267.8321 | 207.0326 | 193.4404 | 277.1217 | 249.005  | 267.5647 | 164.0093 | 233.1672 | 231.4781 | 225.8276 | -0.26752 | 0.237233 | -0.25393  | 0.292635  | -0.23296 | 0.538161 |
| AT1G10500 | ISCA      | 296.0371 | 353.2807 | 341.2284 | 374.4733 | 301.4226 | 354.8753 | 362.8356 | 431.556  | 458.8356 | 451.9413 | 441.6709 | 374.9982 | 0.061105 | 0.770793 | 0.336012  | 0.055823  | 0.353876 | 1.143656 |
| AT1G10510 | emb200    | 368.5602 | 385.3971 | 413.337  | 310.1365 | 264.3244 | 268.1502 | 318.3706 | 332.2981 | 282.1351 | 382.8547 | 407.0822 | 462.0143 | -0.45771 | 0.001754 | -0.31929  | 0.044961  | 0.09995  | 0.742031 |
| AT1G10520 | AT1G10520 | 5.94452  | 8.92123  | 16.73951 | 19.79595 | 9.937009 | 13.95577 | 10.67164 | 9.710009 | 9.76246  | 9.595356 | 10.64267 | 6.215439 | 0.420101 | 0.442983 | -0.05853  | 0.934089  | -0.21821 | NA       |
| AT1G10522 | AT1G10522 | 240.1586 | 269.4212 | 276.8457 | 342.7173 | 393.5056 | 311.0143 | 284.5771 | 296.6947 | 384.6049 | 300.3347 | 337.9048 | 291.0897 | 0.409775 | 0.193968 | 0.292327  | 0.129508  | 0.235353 | 0.434126 |
| AT1G10530 | AT1G10530 | 4.755616 | 1.784246 | 3.862963 | 3.299325 | 3.974804 | 5.981045 | 2.66791  | 1.07889  | 3.904984 | 3.831413 | 1.330334 | 5.179533 | 0.174221 | 0.02143  | -0.28698  | 0.724063  | -0.01009 | NA       |
| AT1G10538 | AT1G10538 | 0        | 0        | 0        | 0        | 0        | 0        | 0        | 0        | 0        | 0        | 0        | 0        | #N/A     | #N/A     | #N/A      | #N/A      | #N/A     | #N/A     |
| AT1G10540 | NAT8      | 9.511232 | 5.352738 | 10.30123 | 8.660727 | 13.91181 | 17.94313 | 7.114428 | 5.39445  | 8.786214 | 11.51443 | 7.982004 | 10.35907 | 0.50117  | 0.357629 | -0.21881  | 0.74872   | 0.175563 | NA       |
| AT1G10550 | XTH33     | 9.511232 | 23.1952  | 19.31482 | 10.7228  | 6.624673 | 15.94945 | 2.66791  | 8.63112  | 19.52492 | 7.676285 | 3.991002 | 11.39497 | -0.50148 | 0.400009 | -0.57266  | 0.359873  | -0.85247 | NA       |
| AT1G10560 | PUB18     | 29.7226  | 24.9794  | 19.31482 | 18.5878  | 17.88662 | 21.9305  | 23.12189 | 22.65669 | 11.71495 | 27.82653 | 18.62468 | 25.89766 | -0.3216  | 0.443908 | -0.32964  | 0.477538  | -0.01621 | 0.988678 |
| AT1G10570 | ULP1C     | 222.325  | 192.6986 | 231.7778 | 227.6534 | 215.9643 | 216.3144 | 279.2413 | 230.8824 | 235.2753 | 209.1788 | 222.1658 | 239.2944 | 0.02367  | 0.91145  | 0.196841  | 0.282821  | 0.043583 | 0.911946 |
| AT1G10580 | AT1G10580 | 237.7808 | 230.1677 | 226.6272 | 237.9638 | 219.517  | 255.1912 | 192.7899 | 264.328  | 246.9902 | 189.0285 | 170.2827 | 199.93   | 0.029908 | 0.895104 | 0.0156    | 0.949371  | -0.30353 | 0.269656 |
| AT1G10585 | AT1G10585 | 2.377808 | 1.784246 | 10.30123 | 37.52982 | 41.73544 | 37.87995 | 39.12935 | 28.05114 | 42.95482 | 7.676285 | 11.97301 | 8.827252 | 2.438891 | 4.2E-09  | 2.350866  | 2.8E-08   | 0.566143 | 0.514321 |
| AT1G10586 | AT1G10586 | 0        | 0        | 0        | 1.649662 | 1.987402 | 2.990522 | 0.889303 | 5.39445  | 6.833722 | 0        | 0        | 1.035907 | 0.909423 | 0.161396 | 1.49336   | 0.017352  | 0.118214 | NA       |
| AT1G10588 | AT1G10588 | 0        | 0        | 0        | 0        | 0        | 0        | 0        | 0        | 0        | 0        | 0        | 0        | #N/A     | #N/A     | #N/A      | #N/A      | #N/A     | #N/A     |
| AT1G10590 | AT1G10590 | 605.1521 | 701.2087 | 609.0605 | 988.1477 | 1009.6   | 873.2325 | 668.7562 | 743.3552 | 1137.327 | 672.6345 | 698.4253 | 603.9335 | 0.572121 | 0.003056 | 0.403751  | 0.052426  | 0.044122 | 0.928402 |
| AT1G10600 | AMSHZ     | 158.1242 | 180.2088 | 222.7642 | 237.9638 | 180.1911 | 167.4693 | 296.3181 | 254.618  | 221.6078 | 221.6527 | 203.5411 | 211.3249 | 0.070094 | 0.788924 | 0.44969   | 0.037418  | 0.177903 | 0.653386 |
| AT1G10610 | BHLH9     | 231.8363 | 208.7568 | 164.8198 | 128.2612 | 142.4305 | 141.5514 | 178.75   | 181.2535 | 201.1067 | 232.6076 | 244.7815 | 206.1454 | -0.54901 | 0.001684 | -0.10738  | 0.363474  | 0.16884  | 0.607752 |
| AT1G10620 | PERK11    | 0        | 0        | 0        | 0.412416 | 0        | 0        | 1.778607 | 1.07889  | 0        | 0        | 0        | 0        | 0.061581 | NA       | 0.476497  | NA        | 0        | NA       |
| AT1G10630 | ATARFA1F  | 633.6858 | 574.5272 | 554.979  | 701.5189 | 813.5098 | 640.9686 | 512.2388 | 531.8927 | 779.0443 | 592.0335 | 848.7531 | 489.9838 | 0.280951 | 0.251296 | 0.046082  | 0.884077  | 0.123722 | 0.794614 |
| AT1G10640 | AT1G10640 | 198.547  | 174.8561 | 153.2309 | 102      |          |          |          |          |          |          |          |          |          |          |           |           |          |          |

|           |           |          |           |          |          |          |          |          |          |          |           |           |           |           |          |          |          |          |          |
|-----------|-----------|----------|-----------|----------|----------|----------|----------|----------|----------|----------|-----------|-----------|-----------|-----------|----------|----------|----------|----------|----------|
| AT1G1100  | AT1G1100  | 2.377808 | 5.352738  | 19.31482 | 7.42348  | 7.28714  | 7.974726 | 14.22886 | 14.02557 | 11.71495 | 7.676285  | 13.30334  | 11.39497  | -0.23     | 0.722203 | 0.438763 | 0.481684 | 0.173131 | NA       |
| AT1G1110  | AT1G1110  | 1.188904 | 0         | 0        | 0        | 0        | 0.996841 | 0.889303 | 0        | 0        | 0         | 0         | 0         | -0.05691  | NA       | -0.04692 | NA       | -0.20555 | NA       |
| AT1G1112  | AT1G1112  | 8.322328 | 7.136984  | 6.438272 | 15.67179 | 21.19895 | 9.968408 | 10.67164 | 10.7889  | 24.40615 | 11.51443  | 11.97301  | 10.35907  | 0.89156   | 0.077451 | 0.88316  | 0.121153 | 0.46512  | NA       |
| AT1G1120  | AT1G1120  | 32.10041 | 21.41095  | 21.89012 | 17.32145 | 19.87402 | 19.93682 | 8.893035 | 8.63112  | 16.59618 | 21.10978  | 15.96401  | 15.5386   | -0.38153  | 0.369529 | -1.01887 | 0.015866 | -0.47008 | 0.501624 |
| AT1G1125  | AT1G1125  | 19.02246 | 1.784246  | 11.58889 | 20.20836 | 17.88662 | 25.91786 | 12.45025 | 22.65669 | 11.71495 | 9.593536  | 2.660668  | 8.287522  | 0.753359  | 0.138543 | 0.359225 | 0.55446  | -0.52666 | NA       |
| AT1G1130  | SUB       | 152.1797 | 133.8185  | 127.4777 | 113.0019 | 95.39529 | 151.9642 | 97.82338 | 129.4668 | 93.71962 | 129.5373  | 151.6581  | 111.8779  | -0.362484 | 0.0944   | -0.36243 | 0.117702 | -0.08013 | 0.868534 |
| AT1G1145  | AT1G1145  | 0        | 0         | 0        | 0        | 0        | 0        | 0        | 0        | 0        | 0         | 0         | 0         | #N/A      | #N/A     | #N/A     | #N/A     | #N/A     | #N/A     |
| AT1G1150  | AT1G1150  | 52.31177 | 57.09587  | 45.0679  | 47.01538 | 38.4231  | 57.81677 | 60.47264 | 63.65451 | 59.55101 | 44.13864  | 65.18636  | 64.2262   | -0.11336  | 0.739574 | 0.245372 | 0.455545 | 0.157612 | 0.786409 |
| AT1G1160  | AT1G1160  | 32.10041 | 24.97944  | 24.46543 | 16.49662 | 19.87402 | 15.94945 | 22.23259 | 23.73558 | 8.786214 | 30.70514  | 30.59768  | 42.47217  | -0.58608  | 0.139247 | -0.5253  | 0.228094 | 0.316791 | 0.652681 |
| AT1G1170  | AT1G1170  | 23.77808 | 23.1952   | 37.34198 | 48.66504 | 43.06037 | 37.87995 | 86.26244 | 51.78672 | 52.71728 | 40.3005   | 35.91902  | 35.22082  | 0.571383  | 0.090672 | 1.091224 | 0.000629 | 0.356182 | 0.560065 |
| AT1G1175  | AT1G1175  | 66.57862 | 66.0171   | 61.80741 | 82.48311 | 87.44568 | 69.77885 | 75.5908  | 85.23231 | 148.3894 | 74.84378  | 78.4897   | 99.44703  | 0.291093  | 0.354065 | 0.634308 | 0.031131 | 0.358787 | 0.469433 |
| AT1G1180  | SCAMP5    | 126.0238 | 126.6815  | 117.1765 | 133.2102 | 133.1559 | 132.5798 | 155.6281 | 147.8079 | 188.4155 | 145.8494  | 105.0964  | 109.8061  | 0.107745  | 0.650582 | 0.403591 | 0.053973 | -0.02517 | 0.963016 |
| AT1G1185  | AT1G1185  | 1.188904 | 1.784246  | 1.287654 | 2.062078 | 2.649869 | 0        | 4.446517 | 1.07889  | 3.904984 | 0         | 1.330334  | 1.035907  | 0.109103  | 0.896822 | 0.59269  | 0.426491 | -0.2896  | NA       |
| AT1G1190  | END01     | 13.07794 | 28.54794  | 21.89012 | 30.51875 | 26.49869 | 36.88311 | 21.34328 | 17.26224 | 9.76246  | 21.10978  | 19.95501  | 15.5386   | 0.542589  | 0.182282 | -0.30885 | 0.504682 | -0.1146  | 0.905042 |
| AT1G11200 | AT1G11200 | 154.5575 | 144.5239  | 186.7099 | 227.241  | 220.6016 | 230.2702 | 226.7724 | 195.2791 | 287.9626 | 144.8899  | 134.3637  | 122.237   | 0.464344  | 0.015437 | 0.530868 | 0.006681 | -0.2725  | 0.421847 |
| AT1G11210 | AT1G11210 | 65.38972 | 85.64381  | 73.3963  | 238.7886 | 208.6772 | 219.305  | 391.2935 | 397.0315 | 395.3796 | 53.734    | 63.85603  | 64.2262   | 1.554356  | 1.16E-19 | 2.367313 | 2.24E-45 | -0.28459 | 0.441758 |
| AT1G11220 | AT1G11220 | 26.15589 | 10.70548  | 9.01358  | 37.94223 | 27.82363 | 27.91154 | 26.6791  | 31.28781 | 21.47741 | 26.867    | 22.61568  | 16.5765   | 0.888557  | 0.027092 | 0.648198 | 0.148909 | 0.413788 | 0.587439 |
| AT1G11230 | AT1G11230 | 0        | 0         | 0        | 1.237247 | 0        | 0        | 1.07889  | 0        | 0.995936 | 0         | 1.035907  | 0         | 0.228578  | NA       | 0.156289 | NA       | 0.319415 | NA       |
| AT1G11240 | AT1G11240 | 192.6024 | 176.6404  | 226.6272 | 322.0966 | 366.3444 | 264.1628 | 237.444  | 254.618  | 483.2418 | 239.8839  | 171.6131  | 232.0431  | 0.64421   | 0.017071 | 0.674266 | 0.01482  | 0.105645 | 0.865221 |
| AT1G11250 | SYP125    | 0        | 0         | 1.287654 | 0.824831 | 0.662467 | 0.996841 | 0        | 0        | 0.972646 | 0         | 1         | 0.1035907 | 0.220974  | NA       | -0.07825 | NA       | -0.05528 | NA       |
| AT1G11260 | STP1      | 146.0063 | 1771.7516 | 1221.984 | 1168.786 | 1060.61  | 1346.732 | 1228.128 | 1619.414 | 1869.511 | 902.923   | 932.5641  | 940.6301  | -0.2989   | 0.133998 | 0.092165 | 0.706967 | -0.65484 | 0.004238 |
| AT1G11265 | AT1G11265 | 10.70014 | 21.41095  | 15.45185 | 11.96005 | 13.91181 | 16.94629 | 28.45771 | 24.81447 | 23.4299  | 4.97678   | 3.991002  | 9.323159  | -0.122    | 0.822714 | 0.668067 | 0.143784 | -0.10621 | NA       |
| AT1G11270 | AT1G11270 | 57.06739 | 58.88012  | 38.62963 | 48.25262 | 58.95959 | 51.83572 | 46.24378 | 53.9445  | 39.04984 | 41.26003  | 38.57969  | 46.61579  | 0.045485  | 0.900258 | -0.13722 | 0.706842 | -0.26035 | 0.626348 |
| AT1G11280 | AT1G11280 | 335.2709 | 322.9485  | 315.4753 | 174.4514 | 174.8914 | 200.365  | 172.5429 | 163.9913 | 120.0783 | 283.063   | 37.19498  | 302.4847  | -0.81809  | 1.32E-07 | -1.07177 | 1.55E-11 | -0.10845 | 0.745649 |
| AT1G11290 | PCMP-H40  | 85.60108 | 89.2123   | 56.65679 | 40.41673 | 34.4483  | 68.78201 | 79.14801 | 79.83786 | 55.64602 | 74.84378  | 77.15937  | 62.15439  | -0.67339  | 0.025134 | -0.09561 | 0.813158 | -0.10083 | 0.883204 |
| AT1G11300 | AT1G11300 | 130.7794 | 164.1506  | 144.2173 | 295.702  | 309.3722 | 306.0301 | 204.5398 | 230.8824 | 163.0331 | 142.0113  | 139.6851  | 151.2424  | 1.042045  | 2.55E-10 | 0.444303 | 0.018772 | -0.00966 | 0.986392 |
| AT1G11310 | MLO2      | 1328.006 | 1509.472  | 1451.186 | 2516.56  | 2360.371 | 2481.137 | 2304.185 | 2342.27  | 1770.91  | 1090.992  | 1118.811  | 1102.205  | 0.771352  | 4.84E-10 | 0.575945 | 6.75E-06 | -0.36757 | 0.03885  |
| AT1G11320 | AT1G11320 | 38.04493 | 41.03766  | 51.50617 | 44.9533  | 46.37271 | 58.81361 | 37.35075 | 26.97225 | 30.26363 | 37.42189  | 19.95501  | 35.22082  | 0.176542  | 0.621584 | -0.4291  | 0.229567 | -0.43952 | 0.413692 |
| AT1G11330 | AT1G11330 | 548.0847 | 490.6677  | 490.5963 | 668.1132 | 606.82   | 670.873  | 441.9838 | 494.1316 | 391.4746 | 330.0803  | 345.8868  | 374.9982  | 0.341539  | 0.012548 | -0.20484 | 0.190164 | -0.53632 | 0.001301 |
| AT1G11340 | RKS1      | 20.21137 | 33.90067  | 25.75309 | 25.15735 | 20.53649 | 24.92102 | 33.79533 | 38.84004 | 29.28738 | 23.98839  | 10.64267  | 31.0772   | -0.13738  | 0.765985 | 0.346484 | 0.42565  | -0.19972 | 0.805717 |
| AT1G11350 | SD113     | 387.5827 | 487.0992  | 421.063  | 429.3246 | 355.0825 | 514.3698 | 481.1132 | 584.7583 | 411.9758 | 326.2421  | 279.3701  | 369.8186  | 0.003598  | 0.989575 | 0.18765  | 0.425362 | -0.39319 | 0.189424 |
| AT1G11360 | AT1G11360 | 221.1361 | 244.4417  | 211.1753 | 233.4272 | 243.788  | 228.2765 | 204.5398 | 228.7247 | 354.3773 | 210.1383  | 191.5681  | 202.0018  | 0.062223  | 0.816215 | 0.215762 | 0.379985 | -0.15657 | 0.711416 |
| AT1G11362 | AT1G11362 | 1.188904 | 0         | 0        | 0        | 1.324935 | 0        | 1.778607 | 3.23667  | 4.88123  | 0         | 0         | 1.035907  | -0.08494  | 0.912227 | 1.041812 | 0.095782 | -0.07048 | NA       |
| AT1G11370 | PME56     | 0        | 0         | 0        | 0        | 0        | 0        | 1.07889  | 0        | 0        | 0         | 0         | 0         | 0         | NA       | 0.16673  | NA       | 0        | NA       |
| AT1G11380 | AT1G11380 | 52.31177 | 82.07532  | 68.24568 | 72.99756 | 76.18374 | 66.78833 | 56.02612 | 96.0212  | 92.74337 | 69.08657  | 55.87403  | 95.3034   | 0.105283  | 0.76981  | 0.26776  | 0.433326 | 0.136436 | 0.833201 |
| AT1G11390 | AT1G11390 | 139.9683 | 94.56504  | 92.71111 | 96.09283 | 85.45828 | 123.6083 | 93.37687 | 102.4945 | 112.2683 | 82.52006  | 77.15937  | 81.83662  | -0.08653  | 0.760631 | -0.06037 | 0.848964 | -0.39579 | 0.285974 |
| AT1G11400 | PYM       | 105.8125 | 115.976   | 128.7654 | 121.9816 | 209.3397 | 180.4282 | 180.5282 | 192.0424 | 262.6102 | 129.5373  | 102.4357  | 157.4578  | 0.760038  | 0.000352 | 0.830584 | 0.000116 | -0.15203 | 0.740122 |
| AT1G11410 | AT1G11410 | 261.5589 | 306.8903  | 279.421  | 232.19   | 188.8032 | 212.3271 | 260.5659 | 216.8569 | 171.8193 | 327.2016  | 395.1092  | 362.5673  | -0.405    | 0.031109 | -0.37057 | 0.063565 | 0.350054 | 0.206399 |
| AT1G11420 | ATUDF2    | 42.80054 | 33.90067  | 42.49259 | 32.58029 | 35.77323 | 30.90206 | 27.56841 | 38.84004 | 26.35864 | 57.57214  | 50.55269  | 59.04667  | -0.26102  | 0.428705 | -0.36309 | 0.295401 | 0.456626 | 0.320116 |
| AT1G11430 | MORF9     | 191.0117 | 981.3353  | 1061.027 | 990.6222 | 895.6558 | 893.1659 | 997.9785 | 952.6598 | 1242.761 | 1209.015  | 1239.871  | 1165.395  | -0.13372  | 0.368817 | 0.062998 | 0.171752 | 0.239173 | 0.241584 |
| AT1G11440 | AT1G11440 | 144.9802 | 237.3047  | 213.7506 | 216.6306 | 273.599  | 204.3524 | 260.5659 | 224.0091 | 267.914  | 281.1439  | 258.0848  | 217.5404  | -0.110802 | 0.614412 | 0.222885 | 0.296022 | 0.292329 | 0.479353 |
| AT1G11450 | AT1G11450 | 34.47821 | 7.136984  | 14.1642  | 25.98218 | 20.53649 | 30.90206 | 29.34701 | 17.26224 | 24.40615 | 24.94793  | 13.30334  | 31.0772   | 0.350683  | 0.485598 | 0.254788 | 0.651003 | 0.234205 | 0.805161 |
| AT1G11460 | AT1G11460 | 0        | 0         | 3.862963 | 4.536571 | 1.324935 | 1.993682 | 5.335821 | 3.23667  | 0        | 1.919071  | 1.330334  | 2.071813  | 0.421472  | 0.569641 | 0.449904 | 0.559408 | 0.131487 | NA       |
| AT1G11470 | AT1G11470 | 1.188904 | 0         | 0        | 0        | 0        | 0        | 0        | 0        | 0        | 0         | 0         | 0         | -0.2184   | NA       | -0.20558 | NA       | -0.19918 | NA       |
| AT1G11475 | NRPB10    | 99.86793 | 67.80135  | 93.99877 | 249.5114 | 257.6998 | 152.5166 | 128.949  | 119.7568 | 264.5627 | 136.2541  | 95.78405  | 156.4219  | 1.236533  | 6.32E-05 | 0.892076 | 0.006628 | 0.520877 | 0.316856 |
| AT1G11480 | AT1G11480 | 418.4942 | 504.9416  | 385.0086 | 433.4488 | 410.0672 | 482.4709 | 409.9689 | 496.2894 | 410.9996 | 379.0166  | 371.1632  | 367.7468  | 0.022279  | 0.913425 | 0.014245 | 0.948206 | -0.21709 | 0.402692 |
| AT1G11482 | AT1G11482 | 1.188904 | 0         | 1.287654 | 0.412416 | 0        | 0        | 1.07889  | 0.972646 | 0        | 0.2660668 | 0.2071813 | 0         | -0.4588   | NA       | -0.10216 | NA       | 0.279792 | NA       |
| AT1G11490 | AT1G11490 | 2.377808 | 3.568492  | 3.862963 | 1.237247 | 0.662467 | 1.993682 | 2.66791  | 1.07889  | 0.972646 | 4.797678  | 10.64267  | 5.179533  | -0.76536  | 0.263499 | -0.53591 | 0.480388 | 0.573865 | NA       |
| AT1G11500 | AT1G11500 | 2.377808 | 3.568492  | 1.287654 | 1.237247 | 1.987402 | 4.984204 | 2.66791  | 1.07889  | 3.904984 | 6.716749  | 2.660668  | 3.10772   | 0.026042  | 0.976016 | 0.063247 | 0.943691 | 0.501051 | NA       |
| AT1G11510 | AT1G11510 | 0        | 1.784246  | 0        | 0        | 0        | 0        | 1.778607 | 0        | 0.995936 | 0         | 0.2071813 | 0         | -0.33367  | NA       | 0.052654 | NA       | 0.235244 | NA       |
| AT1G11520 | AT1G11520 | 21.40027 | 16.05821  | 20.60247 | 21.85803 | 20.53649 | 18.93997 | 15.56468 | 20.49891 | 44.90732 | 14.39303  | 22.61568  | 16.57     |           |          |          |          |          |          |



|           |           |          |          |          |           |          |          |          |          |          |          |          |          |          |   |   |   |   |   |          |          |           |          |          |          |
|-----------|-----------|----------|----------|----------|-----------|----------|----------|----------|----------|----------|----------|----------|----------|----------|---|---|---|---|---|----------|----------|-----------|----------|----------|----------|
| AT1G11920 | AT1G11920 | 0        | 0        | 1.287654 | 0         | 0        | 0        | 0.889303 | 1.07889  | 0        | 0        | 0        | 0        | 0        | 0 | 0 | 0 | 0 | 0 | -0.27795 | NA       | 0.123441  | NA       | -0.23964 | NA       |
| AT1G11925 | AT1G11925 | 1.188904 | 0        | 2.575309 | 4.124156  | 4.637271 | 7.974726 | 11.56095 | 8.63112  | 2.928738 | 0        | 0        | 0        | 0        | 0 | 0 | 0 | 0 | 0 | 1.099036 | 0.089352 | 1.464611  | 0.022868 | -0.66919 | NA       |
| AT1G11930 | AT1G11930 | 681.242  | 669.0923 | 692.758  | 775.7537  | 853.9203 | 764.5769 | 854.6206 | 844.7708 | 1197.854 | 777.2239 | 707.7377 | 713.7396 | 0        | 0 | 0 | 0 | 0 | 0 | 0.224952 | 0.183594 | 0.495657  | 0.001632 | 0.104339 | 0.747535 |
| AT1G11940 | AT1G11940 | 58.25629 | 66.0171  | 59.2321  | 70.93548  | 65.58426 | 62.80097 | 50.6903  | 69.04896 | 49.78855 | 65.24842 | 70.5077  | 77.69299 | 0        | 0 | 0 | 0 | 0 | 0 | 0.131231 | 0.652572 | -0.10987  | 0.740959 | 0.216428 | 0.644477 |
| AT1G11950 | AT1G11950 | 83.22328 | 76.72258 | 77.25926 | 83.30795  | 86.78321 | 103.6714 | 112.0522 | 145.6501 | 113.2445 | 72.92471 | 71.83803 | 73.54936 | 0        | 0 | 0 | 0 | 0 | 0 | 0.181514 | 0.469591 | 0.618986  | 0.004923 | -0.11888 | 0.810018 |
| AT1G11960 | AT1G11960 | 107.0018 | 100.8839 | 99.14938 | 93.61834  | 90.09555 | 93.70303 | 100.4913 | 122.9935 | 94.69586 | 80.60099 | 113.0784 | 79.7648  | 0        | 0 | 0 | 0 | 0 | 0 | -0.17378 | 0.471839 | 0.013178  | 0.965466 | -0.20949 | 0.606351 |
| AT1G11970 | AT1G11970 | 0        | 0        | 0        | 0         | 0        | 0        | 0        | 0        | 0        | 0        | 0        | 0        | 0        | 0 | 0 | 0 | 0 | 0 | #N/A     | #N/A     | #N/A      | #N/A     | #N/A     | #N/A     |
| AT1G11980 | RUB3      | 0        | 0        | 0        | 0         | 0        | 0        | 0        | 1.07889  | 0        | 0        | 0        | 0        | 0        | 0 | 0 | 0 | 0 | 0 | 0        | NA       | 0.16673   | NA       | 0        | NA       |
| AT1G11990 | AT1G11990 | 1.188904 | 3.568492 | 2.575309 | 5.737818  | 15.23675 | 6.977885 | 5.335821 | 9.710009 | 4.88123  | 7.676285 | 7.982004 | 5.179533 | 0        | 0 | 0 | 0 | 0 | 0 | 1.271434 | 0.02997  | 0.869272  | 0.186354 | 0.921682 | NA       |
| AT1G12000 | PPF-BETA1 | 803.6991 | 594.1539 | 677.3062 | 638.4193  | 641.2683 | 597.1076 | 459.7699 | 467.1593 | 486.1705 | 615.0623 | 637.23   | 624.6516 | 0        | 0 | 0 | 0 | 0 | 0 | -0.14713 | 0.317937 | -0.5535   | 2.42E-05 | -0.14915 | 0.537149 |
| AT1G12010 | AT1G12010 | 42.80054 | 55.31163 | 54.08148 | 2.062078  | 2.662078 | 3.312336 | 3.987363 | 2.66791  | 8.63112  | 0.976246 | 57.57214 | 46.56169 | 40.40035 | 0 | 0 | 0 | 0 | 0 | -3.48485 | 7.84E-19 | -3.0998   | 3.45E-14 | -0.04935 | 0.957023 |
| AT1G12013 | SNOR111   | 1.188904 | 0        | 0        | 0.412416  | 0.662467 | 0        | 0        | 0        | 0        | 0        | 0        | 0        | 0        | 0 | 0 | 0 | 0 | 0 | 0.007276 | NA       | -0.22716  | NA       | -0.22076 | NA       |
| AT1G12015 | AT1G12015 | 0        | 0        | 0        | 0         | 0        | 0.996841 | 0        | 0        | 0        | 0        | 0        | 0        | 0        | 0 | 0 | 0 | 0 | 0 | 0.15625  | NA       | 0         | NA       | 0        | NA       |
| AT1G12020 | AT1G12020 | 65.38972 | 89.2123  | 51.50617 | 74.2348   | 89.43308 | 58.81361 | 67.58706 | 36.68226 | 73.21845 | 50.85539 | 62.5257  | 64.2262  | 0        | 0 | 0 | 0 | 0 | 0 | 0.129686 | 0.72576  | -0.17956  | 0.642161 | -0.18878 | 0.766545 |
| AT1G12030 | AT1G12030 | 0        | 1.784246 | 1.287654 | 0.412416  | 0        | 0        | 0.889303 | 0        | 0        | 0.959536 | 0        | 0        | 0        | 0 | 0 | 0 | 0 | 0 | -0.42502 | NA       | 0         | NA       | -0.28555 | NA       |
| AT1G12040 | LRX1      | 0        | 0        | 0        | 0         | 0        | 0        | 0.889303 | 1.07889  | 0        | 0        | 0        | 0        | 0        | 0 | 0 | 0 | 0 | 0 | 0        | NA       | 0.3225    | NA       | 0        | NA       |
| AT1G12050 | AT1G12050 | 312.6817 | 344.3595 | 307.7494 | 307.2496  | 217.2893 | 340.9195 | 342.3818 | 335.5348 | 289.9451 | 359.8259 | 325.9318 | 323.2028 | 0        | 0 | 0 | 0 | 0 | 0 | -0.15443 | 0.467034 | 0.007252  | 0.978064 | 0.066887 | 0.875865 |
| AT1G12060 | BAG5      | 38.04493 | 35.68492 | 38.62963 | 18.5587   | 11.92441 | 21.9305  | 11.56095 | 14.02557 | 28.31113 | 42.21957 | 30.59768 | 32.1131  | 0        | 0 | 0 | 0 | 0 | 0 | -1.01557 | 0.005227 | -0.95984  | 0.013467 | -0.0822  | 0.927039 |
| AT1G12064 | AT1G12064 | 0        | 0        | 0        | 0         | 0        | 0        | 0.889303 | 0        | 0        | 0        | 0        | 0        | 0        | 0 | 0 | 0 | 0 | 0 | 0        | NA       | 0.160764  | NA       | 0        | NA       |
| AT1G12070 | AT1G12070 | 3.566712 | 1.784246 | 1.287654 | 0.824831  | 0.662467 | 0        | 0.889303 | 1.07889  | 0.976246 | 2.878607 | 2.660668 | 3.10772  | 0        | 0 | 0 | 0 | 0 | 0 | -0.82259 | 0.227259 | -0.51753  | 0.494625 | 0.228767 | NA       |
| AT1G12080 | AT1G12080 | 141.4796 | 126.6815 | 148.0802 | 44.9533   | 43.06037 | 62.80097 | 48.91169 | 42.07671 | 79.07593 | 149.6876 | 180.9254 | 138.8115 | 0        | 0 | 0 | 0 | 0 | 0 | -1.43055 | 1.25E-09 | -1.23655  | 4.24E-07 | 0.160971 | 0.744238 |
| AT1G12090 | ELP       | 8127.347 | 8823.097 | 8309.233 | 4120.856  | 4472.317 | 4291.4   | 4273.103 | 4115.965 | 448      | 7440.239 | 7103.983 | 6590.437 | 0        | 0 | 0 | 0 | 0 | 0 | -0.86765 | 1.23E-16 | -0.86765  | 1.92E-13 | -0.25439 | 0.181131 |
| AT1G12100 | AT1G12100 | 5.94452  | 8.92123  | 5.150617 | 4.948987  | 3.312336 | 1.993682 | 3.557214 | 3.23667  | 1.952492 | 4.797678 | 7.982004 | 4.143626 | 0        | 0 | 0 | 0 | 0 | 0 | -0.59482 | 0.356559 | -0.77571  | 0.248016 | -0.16441 | NA       |
| AT1G12110 | NP63      | 357.8601 | 362.2019 | 258.8185 | 129.4985  | 121.2315 | 135.5703 | 125.3918 | 161.8335 | 169.8668 | 268.67   | 290.0128 | 277.6229 | 0        | 0 | 0 | 0 | 0 | 0 | -1.31137 | 1.29E-14 | -1.07411  | 8.68E-10 | -0.22017 | 0.488819 |
| AT1G12120 | AT1G12120 | 727.6092 | 799.3422 | 773.8803 | 731.2128  | 748.588  | 780.5263 | 753.24   | 736.8818 | 767.3294 | 870.2988 | 901.9664 | 866.0179 | 0        | 0 | 0 | 0 | 0 | 0 | -0.02525 | 0.849649 | -0.02457  | 0.865371 | 0.197872 | 0.208131 |
| AT1G12130 | AT1G12130 | 2.377808 | 0        | 0        | 0.2602708 | 0        | 0.996841 | 0.889303 | 1.07889  | 0        | 0        | 0.991002 | 5.179533 | 0        | 0 | 0 | 0 | 0 | 0 | 0.05661  | 0.944934 | -0.11041  | 0.890999 | 0.6489   | NA       |
| AT1G12140 | FMOGS-OK5 | 324.5708 | 337.2225 | 312.9    | 282.0923  | 272.274  | 327.9606 | 314.8134 | 339.8503 | 282.1351 | 319.5254 | 291.3431 | 306.6239 | 0        | 0 | 0 | 0 | 0 | 0 | -0.14655 | 0.369181 | -0.05539  | 0.780458 | -0.08183 | 0.794445 |
| AT1G12150 | AT1G12150 | 17.83356 | 8.92123  | 9.01358  | 8.660727  | 12.58688 | 3.987363 | 10.67164 | 7.55223  | 11.71495 | 8.635821 | 11.97301 | 5.179533 | 0        | 0 | 0 | 0 | 0 | 0 | -0.39361 | 0.49625  | -0.22182  | 0.740081 | -0.41686 | NA       |
| AT1G12160 | AT1G12160 | 38.04493 | 24.97944 | 28.3284  | 54.02644  | 54.98478 | 42.86415 | 19.56468 | 20.49891 | 29.28738 | 26.867   | 13.30334 | 22.78994 | 0        | 0 | 0 | 0 | 0 | 0 | 0.687156 | 0.037791 | -0.38343  | 0.350281 | -0.479   | 0.4308   |
| AT1G12170 | AT1G12170 | 0        | 0        | 0        | 0         | 0        | 0        | 0        | 0        | 0.976246 | 0        | 0        | 0        | 0        | 0 | 0 | 0 | 0 | 0 | 0        | NA       | 0.16673   | NA       | 0        | NA       |
| AT1G12180 | AT1G12180 | 0        | 0        | 0        | 0         | 0        | 0        | 0.889303 | 1.07889  | 0        | 0.959536 | 0        | 0        | 0        | 0 | 0 | 0 | 0 | 0 | 0        | NA       | 0.340278  | NA       | 0.175396 | NA       |
| AT1G12190 | AT1G12190 | 1.188904 | 0        | 0        | 0.412416  | 0        | 0        | 0.889303 | 0        | 0        | 0        | 0        | 0        | 0        | 0 | 0 | 0 | 0 | 0 | -0.12978 | NA       | -0.04528  | NA       | -0.2092  | NA       |
| AT1G12200 | AT1G12200 | 41.61164 | 26.76369 | 19.31482 | 79.18379  | 79.49607 | 72.76938 | 85.37313 | 67.97007 | 87.86214 | 30.70514 | 45.23135 | 24.86176 | 0        | 0 | 0 | 0 | 0 | 0 | 1.299554 | 5.75E-06 | 1.353235  | 3.41E-06 | 0.13938  | 0.850794 |
| AT1G12210 | RFL1      | 51.12287 | 39.25341 | 34.76667 | 67.63615  | 67.57166 | 74.76366 | 82.70522 | 84.15342 | 53.69353 | 40.3005  | 19.95501 | 48.68761 | 0        | 0 | 0 | 0 | 0 | 0 | 0.68879  | 0.025742 | -0.758249 | 0.017249 | -0.17123 | 0.805688 |
| AT1G12211 | AT1G12211 | 1.188904 | 1.784246 | 0        | 1.649662  | 2.649869 | 1.993682 | 0        | 1.07889  | 3.904984 | 0        | 1.330334 | 1.035907 | 0        | 0 | 0 | 0 | 0 | 0 | 0.458037 | 0.522741 | 0.274849  | 0.730488 | -0.10408 | NA       |
| AT1G12220 | RP55      | 241.3475 | 231.952  | 176.4086 | 193.0105  | 185.4908 | 252.2007 | 224.9938 | 269.7225 | 216.7266 | 134.335  | 133.0334 | 156.4219 | 0        | 0 | 0 | 0 | 0 | 0 | -0.04864 | 0.848479 | 0.128448  | 0.604522 | -0.59593 | 0.022972 |
| AT1G12230 | AT1G12230 | 600.3695 | 608.4279 | 638.6766 | 472.2158  | 488.9008 | 483.4678 | 536.25   | 535.1294 | 517.4104 | 630.4149 | 562.7313 | 609.6113 | 0        | 0 | 0 | 0 | 0 | 0 | -0.3535  | 0.001127 | -0.21619  | 0.072723 | -0.03322 | 0.900046 |
| AT1G12240 | BRFUC24   | 1185.337 | 1179.387 | 1079.054 | 725.0266  | 672.4043 | 724.7032 | 843.0597 | 962.3698 | 839.5716 | 1243.558 | 1239.871 | 1207.867 | 0        | 0 | 0 | 0 | 0 | 0 | -0.69269 | 1.08E-11 | -0.37823  | 0.00051  | 0.009993 | 0.625371 |
| AT1G12244 | AT1G12244 | 73.71204 | 49.95889 | 82.40968 | 57.73818  | 58.29712 | 72.92289 | 65.81229 | 114.2208 | 93.07496 | 143.6761 | 107.7343 | 0        | 0        | 0 | 0 | 0 | 0 | 0 | -0.24481 | 0.448553 | -0.26459  | 0.430255 | 0.680397 | 0.671618 |
| AT1G12250 | AT1G12250 | 389.9605 | 431.7875 | 366.9811 | 368.6995  | 405.43   | 332.9448 | 578.0473 | 553.4705 | 735.1132 | 581.4786 | 509.5179 | 506.5583 | 0        | 0 | 0 | 0 | 0 | 0 | -0.09542 | 0.625386 | 0.64395   | 3.77E-05 | 0.423706 | 0.052777 |
| AT1G12260 | NAC007    | 15.45575 | 5.352738 | 11.58889 | 8.248311  | 10.59948 | 9.668408 | 10.67164 | 6.47334  | 4.88123  | 21.10978 | 18.62468 | 17.61041 | 0        | 0 | 0 | 0 | 0 | 0 | -0.20992 | 0.717924 | -0.48523  | 0.402315 | 0.669635 | NA       |
| AT1G12270 | HOP1      | 517.1732 | 435.356  | 408.1864 | 501.4973  | 489.5633 | 514.3698 | 431.3122 | 476.8694 | 442.2394 | 450.9817 | 456.3046 | 422.6499 | 0        | 0 | 0 | 0 | 0 | 0 | 0.140162 | 0.34216  | -0.01518  | 0.936938 | -0.03667 | 0.910917 |
| AT1G12280 | AT1G12280 | 214.0027 | 158.7799 | 176.4086 | 87.84452  | 92.74542 | 141.5514 | 155.6281 | 145.6501 | 128.8645 | 179.4332 | 176.9344 | 209.2531 | 0        | 0 | 0 | 0 | 0 | 0 | -0.77596 | 0.000266 | -0.34771  | 0.153265 | 0.035966 | 0.950237 |
| AT1G12290 | AT1G12290 | 60.6341  | 58.88012 | 60.50175 | 109.7025  | 98.04516 | 129.5893 | 90.7086  | 87.39009 | 75.17094 | 50.85539 | 46.56169 | 66.29802 | 0        | 0 | 0 | 0 | 0 | 0 | 0.865115 | 0.000129 | 0.471311  | 0.069812 | -0.12674 | 0.819853 |
| AT1G12294 | MIR472A   | 0        | 0        | 0        | 0         | 0        | 0        | 0        | 0        | 0        | 0        | 0        | 0        | 0        | 0 | 0 | 0 | 0 | 0 | #N/A     | #N/A     | #N/A      | #N/A     | #N/A     | #N/A     |
| AT1G12300 | AT1G12300 | 65.38972 | 44.60615 | 52.79383 | 37.52982  | 35.77323 | 53.8294  | 29.34701 | 50.70783 | 35.14486 | 51.81492 | 63.85603 | 51.79533 | 0        | 0 | 0 | 0 | 0 | 0 | -0.37592 | 0.238168 | -0.49357  | 0.13909  | 0.01777  | 0.983796 |
| AT1G12310 | CML13     | 373.3158 | 319.38   | 366.9815 | 423.1384  | 438.5533 |          |          |          |          |          |          |          |          |   |   |   |   |   |          |          |           |          |          |          |



|           |           |          |          |          |           |          |          |          |          |           |          |          |          |          |          |          |          |          |          |
|-----------|-----------|----------|----------|----------|-----------|----------|----------|----------|----------|-----------|----------|----------|----------|----------|----------|----------|----------|----------|----------|
| AT1G13710 | CYP78A5   | 89.1678  | 71.36984 | 45.0679  | 44.9533   | 41.07297 | 42.86415 | 40.01866 | 50.70783 | 43.93107  | 59.49121 | 38.57969 | 72.51346 | -0.63266 | 0.037224 | -0.57819 | 0.076652 | -0.24119 | 0.6809   |
| AT1G13720 | AT1G13720 | 1.188904 | 0        | 0        | 0         | 0        | 0        | 0        | 0        | 0         | 0        | 0        | 0        | -0.2184  | NA       | -0.20558 | NA       | -0.19918 | NA       |
| AT1G13730 | AT1G13730 | 293.6593 | 242.6575 | 231.7778 | 175.689   | 186.8158 | 192.3903 | 168.9677 | 170.4646 | 164.0093  | 279.2249 | 224.8264 | 271.4075 | -0.47035 | 0.003465 | -0.60318 | 0.00025  | 0.014606 | 0.975404 |
| AT1G13740 | AFP2      | 78.46766 | 107.0548 | 103.0123 | 74.64722  | 78.83361 | 60.80729 | 75.5908  | 75.5223  | 115.197   | 72.92471 | 94.45371 | 95.3034  | -0.39282 | 0.135218 | -0.10139 | 0.761989 | -0.12571 | 0.819853 |
| AT1G13750 | PAP1      | 265.1256 | 206.9725 | 220.1889 | 436.3357  | 398.8053 | 441.6005 | 393.8682 | 158.5968 | 122.0307  | 80.60099 | 94.45371 | 80.80071 | 0.86049  | 1.41E-06 | -0.53447 | 0.00779  | -1.40344 | 2.62E-11 |
| AT1G13755 | AT1G13755 | 0        | 0        | 0        | 0         | 0        | 0        | 0.889303 | 0        | 0         | 0        | 0        | 0        | 0.160764 | NA       | 0        | NA       | 0        | NA       |
| AT1G13760 | AT1G13760 | 0        | 1.784246 | 0        | 0         | 0        | 0        | 0.889303 | 0        | 0         | 0        | 0        | 0        | -0.26522 | NA       | -0.08117 | NA       | -0.24296 | NA       |
| AT1G13770 | RUS3      | 141.4796 | 139.1712 | 142.9296 | 181.0504  | 167.6042 | 147.5324 | 190.3109 | 145.6501 | 166.9381  | 139.1327 | 146.3367 | 176.1041 | 0.23141  | 0.25913  | 0.244392 | 0.261158 | 0.120559 | 0.763728 |
| AT1G13780 | AT1G13780 | 63.01191 | 87.42806 | 87.5605  | 74.2348   | 78.17114 | 83.73463 | 89.81965 | 92.78453 | 106.4108  | 70.0461  | 74.4987  | 78.7289  | -0.00775 | 0.979663 | 0.283791 | 0.263893 | -0.07801 | 0.883204 |
| AT1G13790 | FDM4      | 93.92341 | 85.64381 | 73.3963  | 56.91335  | 51.00998 | 52.83256 | 54.24751 | 59.33895 | 55.64602  | 82.52006 | 62.5257  | 82.87252 | -0.6259  | 0.006301 | -0.56137 | 0.023516 | -0.13457 | 0.783778 |
| AT1G13800 | AT1G13800 | 11.88904 | 16.05681 | 10.30123 | 5.773818  | 8.612075 | 6.977885 | 9.782338 | 12.94668 | 4.88123   | 4.797678 | 13.30334 | 19.68222 | -0.66654 | 0.225829 | -0.36182 | 0.569158 | -0.00169 | NA       |
| AT1G13810 | AT1G13810 | 68.95643 | 51.74313 | 63.09506 | 61.86234  | 58.95959 | 55.82308 | 61.36194 | 56.10228 | 75.17094  | 52.77446 | 54.54369 | 50.75942 | -0.06228 | 0.843111 | 0.052216 | 0.880926 | -0.22557 | 0.640373 |
| AT1G13820 | AT1G13820 | 324.5708 | 453.1985 | 454.542  | 301.8882  | 251.0751 | 239.2418 | 358.3893 | 306.4047 | 325.0899  | 384.7738 | 343.2262 | 516.9174 | -0.61228 | 0.002077 | -0.30337 | 0.179412 | 0.020017 | 0.971473 |
| AT1G13830 | AT1G13830 | 2.377808 | 0        | 0        | 3.862963  | 14.43455 | 11.92441 | 10.96525 | 7.114428 | 8.63112   | 2.928738 | 1.919071 | 2.660668 | 1.74257  | 0.002004 | 0.879093 | 0.183118 | -0.06513 | NA       |
| AT1G13840 | AT1G13840 | 0        | 0        | 0        | 0         | 0        | 0        | 0        | 0        | 0         | 0        | 0        | 0        | #N/A     | #N/A     | #N/A     | #N/A     | #N/A     | #N/A     |
| AT1G13850 | AT1G13850 | 0        | 0        | 0        | 0         | 0.662467 | 0        | 0        | 0        | 0         | 0        | 0        | 0        | 0.128567 | NA       | 0        | NA       | 0        | NA       |
| AT1G13860 | QUL1      | 214.0027 | 210.541  | 189.2852 | 160.0172  | 143.7554 | 165.4756 | 163.6318 | 181.2535 | 112.2683  | 164.0806 | 183.5861 | 199.93   | -0.37847 | 0.062746 | -0.41485 | 0.051279 | -0.16057 | 0.679758 |
| AT1G13870 | KT12      | 107.0014 | 82.07532 | 123.6148 | 109.2901  | 118.5816 | 98.68724 | 102.2699 | 122.9935 | 137.6507  | 95.95356 | 119.7301 | 111.8779 | 0.051181 | 0.855354 | 0.191648 | 0.467346 | 0.044603 | 0.936644 |
| AT1G13880 | AT1G13880 | 293.6593 | 331.8698 | 267.8321 | 341.8925  | 365.6819 | 389.7647 | 322.8172 | 318.2725 | 293.85    | 296.4965 | 288.6825 | 238.2585 | 0.29448  | 0.059245 | 0.070791 | 0.728199 | -0.11076 | 0.723894 |
| AT1G13890 | SNAP30    | 1.188904 | 0        | 0        | 0         | 0        | 0        | 0.995936 | 0        | 0         | 0        | 0        | 0        | -0.21779 | NA       | -0.19779 | NA       | -0.02864 | NA       |
| AT1G13900 | PAP2      | 323.3819 | 290.8321 | 229.2025 | 193.42229 | 170.9166 | 203.3555 | 213.4328 | 207.1469 | 140.5794  | 171.8146 | 215.5141 | 233.079  | -0.55842 | 0.004545 | -0.57223 | 0.004931 | -0.33031 | 0.299685 |
| AT1G13910 | AT1G13910 | 55.52489 | 70.56683 | 57.94445 | 54.02644  | 54.98478 | 65.79149 | 56.02612 | 43.1556  | 31.23987  | 36.46235 | 61.19536 | 52.83123 | -0.1234  | 0.728808 | -0.50702 | 0.117043 | -0.33165 | 0.530036 |
| AT1G13920 | AT1G13920 | 40.42273 | 32.11643 | 68.24568 | 33.40566  | 36.4357  | 30.90206 | 57.80473 | 50.70783 | 54.66978  | 61.41028 | 91.79304 | 75.62118 | -0.47199 | 0.134024 | 0.182729 | 0.627147 | 0.634988 | 0.133049 |
| AT1G13930 | AT1G13930 | 3522.722 | 3921.773 | 3868.114 | 5109.004  | 4984.404 | 3912.6   | 5904.086 | 5340.505 | 13208.61  | 4099.136 | 4484.556 | 5835.261 | 0.28003  | 0.50615  | 1.012869 | 0.005507 | 0.318098 | 0.639778 |
| AT1G13940 | AT1G13940 | 286.5259 | 212.3253 | 274.2704 | 160.4297  | 160.9795 | 191.3934 | 176.9714 | 199.5946 | 152.2944  | 239.8839 | 224.8264 | 242.4021 | -0.59842 | 0.000472 | -0.5476  | 0.002295 | -0.13361 | 0.701627 |
| AT1G13950 | ELF5A-1   | 80.84547 | 99.91778 | 99.1498  | 134.0351  | 135.8058 | 108.6556 | 85.97313 | 81.99564 | 105.4607  | 141.0517 | 194.2288 | 125.3447 | 0.425025 | 0.126766 | 0.156727 | 0.648029 | 0.688862 | 0.056905 |
| AT1G13960 | WRKY4     | 229.4585 | 248.0102 | 200.36   | 242.0879  | 272.9365 | 255.1912 | 281.0393 | 332.2981 | 249.8929  | 141.0217 | 147.6671 | 180.2477 | 0.165701 | 0.450608 | 0.258997 | 0.234617 | 0.468684 | 0.092225 |
| AT1G13970 | AT1G13970 | 28.53369 | 17.84246 | 27.04074 | 46.60296  | 60.28452 | 67.78517 | 47.13308 | 51.78672 | 32.21612  | 41.26003 | 37.24935 | 31.0772  | 1.115339 | 0.000351 | 0.736716 | 0.034492 | 0.497074 | 0.372189 |
| AT1G13980 | GN        | 900.0003 | 567.3902 | 576.8691 | 293.6399  | 272.274  | 348.894  | 391.2935 | 442.3449 | 310.4462  | 508.5559 | 506.8572 | 494.1274 | -1.1342  | 5.62E-09 | -0.81785 | 1.15E-05 | -0.42859 | 0.161579 |
| AT1G13990 | AT1G13990 | 307.9261 | 403.2396 | 383.721  | 1039.7    | 967.2022 | 949.9893 | 1076.057 | 1048.681 | 1109.992  | 504.7157 | 553.4189 | 386.3931 | 1.415    | 7.69E-22 | 1.541624 | 1.52E-25 | 0.394244 | 0.887743 |
| AT1G14000 | VIK       | 724.0225 | 804.695  | 637.3889 | 664.4015  | 678.3665 | 802.4568 | 642.0771 | 710.9885 | 586.72338 | 599.7098 | 826.1374 | 621.5439 | -0.01393 | 0.924277 | -0.15459 | 0.45143  | -0.0806  | 0.833341 |
| AT1G14010 | AT1G14010 | 116.5126 | 124.8972 | 144.2173 | 298.1765  | 325.2714 | 264.1628 | 195.6468 | 185.5691 | 283.1113  | 112.2657 | 75.82904 | 113.9497 | 1.167836 | 0.25E-40 | 0.758538 | 0.000685 | -0.32932 | 0.404721 |
| AT1G14020 | AT1G14020 | 130.7794 | 146.3082 | 150.6556 | 131.973   | 105.3323 | 138.5609 | 134.2848 | 131.6246 | 96.64835  | 176.5644 | 130.3727 | 141.9192 | -0.18147 | 0.456043 | -0.22879 | 0.367309 | 0.076296 | 0.878133 |
| AT1G14030 | LSMT-1    | 443.4612 | 538.8423 | 448.1037 | 345.6043  | 363.6945 | 381.79   | 453.5448 | 412.136  | 430.2545  | 406.0599 | 431.0282 | 565.605  | -0.3831  | 0.009922 | -0.13398 | 0.456949 | 0.06899  | 0.836577 |
| AT1G14040 | PHO1      | 41.61164 | 37.46917 | 41.20494 | 54.43886  | 42.39791 | 58.81361 | 46.24378 | 37.76115 | 41.97858  | 41.26003 | 43.90102 | 56.97486 | 0.340893 | 0.26578  | 0.059374 | 0.884939 | 0.222064 | 0.698267 |
| AT1G14048 | AT1G14048 | 0        | 0        | 0        | 0         | 0        | 0        | 0        | 0        | 0         | 0        | 0        | 0        | #N/A     | #N/A     | #N/A     | #N/A     | #N/A     | #N/A     |
| AT1G14060 | AT1G14060 | 105.8125 | 87.42806 | 86.27284 | 143.1082  | 170.9166 | 144.5419 | 134.2848 | 110.0468 | 216.7266  | 101.7108 | 105.0964 | 108.7702 | 0.679096 | 0.006862 | 0.687471 | 0.008035 | 0.160634 | 0.766678 |
| AT1G14070 | FUT7      | 80.84547 | 98.13353 | 101.7247 | 69.28582  | 62.27192 | 70.7757  | 85.37313 | 75.5223  | 65.62227  | 86.35817 | 73.16837 | 83.90843 | -0.45223 | 0.035618 | -0.34672 | 0.183658 | -0.18653 | 0.68156  |
| AT1G14071 | MIR830A   | 1.188904 | 3.568492 | 1.287564 | 0         | 1.324935 | 0        | 0        | 0.976246 | 2.878607  | 0        | 0        | 0        | -0.64026 | 0.317548 | -0.66465 | 0.307109 | -0.16594 | NA       |
| AT1G14080 | FUT6      | 3.566712 | 1.784246 | 1.287564 | 4.948987  | 3.974804 | 7.974726 | 0.889303 | 0        | 0.976246  | 0        | 1.330334 | 0        | 0.90659  | 0.177383 | -0.68882 | 0.347216 | -0.79863 | NA       |
| AT1G14090 | AT1G14090 | 71.33424 | 62.44861 | 72.10864 | 51.13953  | 47.03518 | 57.81677 | 57.80473 | 44.23449 | 48.8123   | 56.6126  | 58.34669 | 68.36983 | -0.40293 | 0.112606 | -0.43183 | 0.115376 | -0.16545 | 0.74422  |
| AT1G14100 | FUT8      | 5.94452  | 7.136984 | 7.725926 | 1.237247  | 0.662467 | 1.993682 | 0.889303 | 2.15778  | 2.928738  | 6.716749 | 10.64267 | 2.071813 | -1.50847 | 0.013576 | -1.13236 | 0.085793 | -0.07392 | NA       |
| AT1G14110 | FUT9      | 0        | 0        | 0        | 0         | 0        | 0        | 0.889303 | 0        | 0         | 0        | 0        | 0        | 0.160764 | NA       | 0        | NA       | 0        | NA       |
| AT1G14120 | AT1G14120 | 1.188904 | 0        | 1.287654 | 11.54764  | 9.937009 | 17.94313 | 14.22886 | 14.02557 | 23.4299   | 10.55489 | 6.65167  | 5.179533 | 2.068922 | 0.000122 | 2.42901  | 6.05E-06 | 1.422101 | NA       |
| AT1G14130 | AT1G14130 | 43.98945 | 42.8219  | 34.76667 | 109.2901  | 92.08295 | 98.68724 | 75.5908  | 83.07453 | 82.00466  | 64.28889 | 59.86503 | 48.68761 | 1.258725 | 6.27E-08 | 0.939325 | 0.00017  | -0.09979 | 0.239609 |
| AT1G14140 | PUM3P     | 150.9908 | 126.6815 | 128.7654 | 178.1635  | 155.6798 | 159.4945 | 120.9453 | 154.2813 | 174.748   | 139.1327 | 121.0604 | 119.1293 | 0.172803 | 0.196036 | 0.43288  | 0.59191  | -0.47987 | 0.824654 |
| AT1G14150 | PNSL2     | 158.1242 | 217.678  | 216.3259 | 116.3012  | 109.3071 | 85.72831 | 232.9975 | 262.1703 | 413.9283  | 227.4099 | 210.1928 | 283.8384 | -0.87488 | 0.000343 | 0.599267 | 0.018797 | 0.279814 | 0.52809  |
| AT1G14160 | AT1G14160 | 0        | 0        | 0        | 0         | 0        | 0        | 0.889303 | 0        | 0         | 0        | 0        | 0        | 0.160764 | NA       | 0        | NA       | 0        | NA       |
| AT1G14170 | AT1G14170 | 104.6235 | 108.839  | 136.4914 | 291.1654  | 268.2992 | 360.8564 | 245.4478 | 227.6458 | 196.2254  | 77.72239 | 77.15937 | 109.8061 | 1.349578 | 4.67E-12 | 0.905519 | 1.14E-05 | -0.38715 | 0.280841 |
| AT1G14180 | AT1G14180 | 90.3567  | 69.5856  | 81.12222 | 69.69823  | 90.09555 | 61.80413 | 59.58333 | 72.28563 | 85.90965  | 68.12703 | 74.4987  | 66.29802 | -0.12081 | 0.68439  | -0.15421 | 0.625162 | -0.21245 | 0.657725 |
| AT1G14182 | SCRL28    | 0        | 0        | 0        | 0         | 0        | 0.996841 | 0        | 0        | 0.976246  | 0        | 0        | 0        | 0.15625  | NA       | 0        | NA       | 0        | NA       |
| AT1G14185 | AT1G14185 | 5.94452  | 7.136984 | 6.438272 | 2.062078  | 0.662467 | 0.996841 | 1.778607 | 2.15778  | 2.928738  | 3.838143 | 3.991002 | 4.143626 | -1.42041 | 0.020654 | -0.97929 | 0.144892 | -0.48215 | NA       |
| AT1G14190 | AT1G14190 | 28.53369 | 16.05821 | 16.7395  |           |          |          |          |          |           |          |          |          |          |          |          |          |          |          |

|           |           |          |          |          |          |          |          |          |          |          |          |          |          |          |          |          |          |          |          |
|-----------|-----------|----------|----------|----------|----------|----------|----------|----------|----------|----------|----------|----------|----------|----------|----------|----------|----------|----------|----------|
| AT1G14642 | AT1G14642 | 8.322328 | 5.352738 | 12.87654 | 8.660727 | 11.92441 | 7.974726 | 10.67164 | 8.63112  | 9.76246  | 5.757214 | 2.660668 | 6.215439 | 0.073082 | 0.913386 | 0.087647 | 0.902039 | -0.64039 | NA       |
| AT1G14650 | AT1G14650 | 835.7995 | 685.1505 | 62.70877 | 538.2023 | 560.4473 | 628.0097 | 587.8296 | 672.1484 | 637.4886 | 606.4265 | 771.5937 | 587.359  | -0.31389 | 0.062069 | -0.17808 | 0.352059 | -0.1303  | 0.682617 |
| AT1G14660 | NHX8      | 73.71204 | 83.89596 | 70.82099 | 73.82239 | 75.52127 | 74.76306 | 61.36194 | 59.33895 | 57.14804 | 47.97678 | 42.57069 | 54.90305 | -0.01589 | 0.95922  | -0.38088 | 0.144273 | -0.60839 | 0.700883 |
| AT1G14670 | TMN2      | 1121.136 | 958.1401 | 947.7136 | 939.8951 | 737.3261 | 1001.825 | 854.6206 | 924.6087 | 550.6027 | 749.3973 | 916.6001 | 792.4685 | -0.17265 | 0.462859 | -0.36841 | 0.095747 | -0.29366 | 0.38561  |
| AT1G14680 | AT1G14680 | 20.21137 | 17.84246 | 18.02716 | 14.84696 | 21.19895 | 11.96209 | 18.67537 | 21.5778  | 22.45366 | 20.15025 | 15.96401 | 15.75445 | -0.19458 | 0.68251  | 0.138094 | 0.979531 | -0.07706 | 0.940175 |
| AT1G14685 | BPC2      | 344.7821 | 335.4383 | 341.2284 | 529.5416 | 567.7345 | 565.2087 | 606.505  | 611.7306 | 659.9423 | 327.2016 | 381.8058 | 374.9982 | 0.692248 | 0.484209 | 0.682588 | 1.625133 | -0.07966 | 0.707791 |
| AT1G14686 | AT1G14686 | 2.377808 | 0        | 1.28754  | 0.412416 | 0.662467 | 0        | 0        | 1.952492 | 0        | 0        | 0        | 0        | -0.41216 | NA       | -0.25572 | NA       | -0.6125  | NA       |
| AT1G14687 | ZHD14     | 10.70014 | 10.70548 | 10.30213 | 19.38353 | 13.24935 | 8.971567 | 9.782338 | 12.94668 | 21.47741 | 8.635821 | 11.97301 | 9.323159 | 0.374141 | 0.490823 | 0.039531 | 0.494235 | -0.08357 | NA       |
| AT1G14688 | AT1G14688 | 1.188904 | 0        | 1.287654 | 0        | 0        | 0        | 0        | 0        | 0        | 0        | 0        | 0        | -0.4448  | NA       | -0.42471 | NA       | -0.41895 | NA       |
| AT1G14690 | MAP65-7   | 631.308  | 636.9758 | 593.6087 | 519.2312 | 485.5885 | 618.0413 | 674.9813 | 618.2039 | 394.4034 | 650.5652 | 665.167  | 684.7342 | -0.19551 | 0.366646 | -0.13773 | 0.565382 | 0.101497 | 0.805923 |
| AT1G14700 | PAP3      | 172.3911 | 242.6575 | 254.9556 | 49.48987 | 36.4357  | 25.91786 | 62.25124 | 46.39227 | 57.59851 | 278.2653 | 292.6735 | 265.1921 | -2.4256  | 2.35E-28 | -1.92337 | 6.37E-18 | 0.316334 | 0.388952 |
| AT1G14710 | AT1G14710 | 545.7069 | 465.6882 | 469.9938 | 473.4531 | 444.5155 | 439.6068 | 330.8209 | 383.0059 | 394.4034 | 474.0106 | 528.1426 | 416.4344 | -0.12502 | 0.45529  | -0.41705 | 0.005462 | -0.06121 | 0.838515 |
| AT1G14720 | XTH28     | 323.3819 | 417.5136 | 378.5704 | 532.0161 | 474.3266 | 604.0855 | 644.745  | 630.0717 | 696.0634 | 408.7622 | 336.5745 | 382.2495 | 0.519278 | 0.000617 | 0.809616 | 3.66E-08 | -0.09724 | 0.964692 |
| AT1G14730 | CY8561C   | 11.88904 | 23.1952  | 21.89012 | 12.78488 | 10.59948 | 13.95577 | 14.22886 | 9.710009 | 5.87476  | 17.27164 | 11.97301 | 13.46678 | -0.51005 | 0.289546 | -0.76261 | 0.122033 | -0.32273 | NA       |
| AT1G14740 | OBE3      | 814.3992 | 826.1059 | 691.4704 | 746.0598 | 752.5628 | 832.362  | 832.3881 | 937.5554 | 892.2888 | 607.3861 | 630.5783 | 600.8258 | -0.0014  | 0.980655 | -0.19037 | 0.161423 | -0.33844 | 0.040326 |
| AT1G14750 | SD5       | 8.322328 | 17.84246 | 9.01358  | 19.79595 | 17.88662 | 21.9305  | 13.33955 | 12.94668 | 7.809968 | 6.716749 | 5.321336 | 8.287252 | 0.724904 | 0.11888  | 0.011253 | 0.986422 | -0.56932 | NA       |
| AT1G14755 | AT1G14755 | 0        | 0        | 0        | 0        | 0        | 0        | 0        | 0        | 0        | 0        | 0        | 0        | #N/A     | #N/A     | #N/A     | #N/A     | #N/A     | #N/A     |
| AT1G14760 | KNATM     | 1.188904 | 3.568492 | 1.287654 | 6.598649 | 5.299738 | 10.96525 | 9.782338 | 0        | 9.76246  | 2.878607 | 2.660668 | 3.10772  | 1.128258 | 0.075995 | 0.988873 | 0.145461 | 0.241501 | NA       |
| AT1G14770 | AT1G14770 | 101.0568 | 57.09587 | 83.69753 | 68.46099 | 71.54647 | 60.80729 | 66.69776 | 50.70783 | 55.64602 | 97.87263 | 97.11438 | 71.47755 | -0.27239 | 0.328538 | -0.47825 | 0.088704 | 0.110535 | 0.848756 |
| AT1G14780 | AT1G14780 | 3.566712 | 3.568492 | 5.150617 | 34.23049 | 24.51129 | 35.88627 | 36.46144 | 45.31338 | 40.02609 | 57.57214 | 1.330334 | 2.071813 | 2.369383 | 6.16E-08 | 2.701981 | 5.74E-10 | -0.26265 | 0.827023 |
| AT1G14790 | RDR1      | 436.3277 | 388.9656 | 327.0642 | 237.9638 | 241.8006 | 309.0206 | 232.1082 | 289.1425 | 229.4178 | 255.2365 | 243.4511 | 216.5045 | -0.54376 | 0.002192 | -0.60772 | 0.000797 | -0.6738  | 0.002058 |
| AT1G14800 | AT1G14800 | 0        | 0        | 0        | 0        | 0        | 0        | 0        | 1.07889  | 0        | 0        | 0        | 0        | 0        | NA       | 0.16673  | NA       | 0        | NA       |
| AT1G14810 | AT1G14810 | 537.3846 | 499.5889 | 488.021  | 407.879  | 428.6163 | 394.7489 | 465.1057 | 421.846  | 608.2013 | 414.5194 | 549.4279 | 507.5942 | -0.30296 | 0.090785 | -0.0281  | 0.907629 | -0.05387 | 0.894073 |
| AT1G14820 | AT1G14820 | 80.84547 | 123.113  | 126.1901 | 252.3983 | 263.662  | 241.2355 | 267.8003 | 262.1703 | 317.2799 | 154.4852 | 188.9074 | 109.8061 | 1.167325 | 3.73E-08 | 1.323216 | 4.19E-10 | 0.440414 | 0.214089 |
| AT1G14830 | DRP1C     | 747.8206 | 692.2875 | 763.579  | 593.466  | 557.135  | 730.6843 | 668.7562 | 715.304  | 400.2669 | 730.2066 | 679.8007 | 629.8163 | -0.29212 | 0.201782 | -0.29712 | 0.012782 | -0.10893 | 0.801603 |
| AT1G14840 | MAP70.4   | 488.6395 | 463.904  | 498.3222 | 275.4936 | 251.3776 | 263.166  | 250.7836 | 292.3792 | 236.2515 | 482.6464 | 461.6259 | 541.7791 | -0.86513 | 2.15E-11 | -0.88894 | 2.12E-11 | 0.034288 | 0.920201 |
| AT1G14850 | NUP155    | 306.7372 | 296.1848 | 222.7642 | 158.3676 | 135.8058 | 188.4029 | 165.2986 | 121.4624 | 103.4821 | 206.3002 | 187.5771 | 210.2899 | -0.7487  | 0.002159 | -0.74943 | 0.002251 | -0.43068 | 0.256067 |
| AT1G14860 | NUD18     | 1.188904 | 0        | 1.287654 | 28.04426 | 30.47349 | 33.89259 | 24.9005  | 22.65669 | 33.19236 | 4.797678 | 5.321336 | 3.10772  | 3.200316 | 3.4E-11  | 3.013882 | 8.89E-10 | 0.820171 | NA       |
| AT1G14870 | PCR2      | 15.45575 | 24.97944 | 23.17778 | 392.6196 | 424.6415 | 476.4899 | 401.9652 | 388.4004 | 539.864  | 6.835821 | 11.97301 | 11.39497 | 4.143559 | 3.57E-61 | 4.184566 | 4.14E-62 | -0.81199 | 0.119159 |
| AT1G14880 | PCR1      | 257.9922 | 456.767  | 342.5161 | 401.9628 | 3634.295 | 2789.16  | 200.9826 | 184.4902 | 279.2064 | 65.24842 | 54.54369 | 92.19568 | 3.192617 | 5.08E-48 | -0.63256 | 0.103314 | -2.18006 | 1.01E-17 |
| AT1G14890 | AT1G14890 | 155.7464 | 123.113  | 127.4778 | 191.7732 | 145.0803 | 124.6051 | 92.48756 | 114.3623 | 140.5794 | 122.8026 | 109.0874 | 110.842  | 0.185834 | 0.484389 | -0.22585 | 0.421028 | -0.24015 | 0.580219 |
| AT1G14900 | HMG4      | 156.9353 | 126.6815 | 153.2309 | 278.3805 | 235.8383 | 244.226  | 152.9602 | 145.6501 | 185.4867 | 201.5025 | 166.2917 | 139.8474 | 0.772473 | 3.62E-05 | 0.135578 | 0.5906   | 0.204276 | 0.582115 |
| AT1G14910 | AT1G14910 | 311.4928 | 224.815  | 249.8049 | 203.3209 | 141.1055 | 214.3208 | 177.8607 | 207.1469 | 121.0545 | 195.7453 | 163.6311 | 164.7091 | -0.48103 | 0.046137 | -0.61801 | 0.011322 | -0.56578 | 0.090582 |
| AT1G14920 | GAI       | 766.843  | 729.7566 | 699.1963 | 281.6798 | 270.9491 | 304.0364 | 276.5734 | 323.667  | 352.4248 | 517.1897 | 364.5115 | 491.0197 | -1.33777 | 3.11E-19 | -1.18555 | 5.81E-15 | -0.66218 | 0.000392 |
| AT1G14930 | AT1G14930 | 0        | 0        | 0        | 0        | 0        | 0        | 0        | 1.07889  | 0.976246 | 0        | 2.660668 | 0        | 0        | NA       | 0.324521 | NA       | 0.378701 | NA       |
| AT1G14940 | AT1G14940 | 0        | 0        | 0        | 0.662467 | 0        | 0        | 0        | 0        | 0        | 0        | 0        | 0        | 0.128567 | NA       | 0        | NA       | 0        | NA       |
| AT1G14950 | AT1G14950 | 0        | 0        | 0        | 0        | 0        | 0.889303 | 0        | 0        | 0        | 0        | 0        | 0        | 0        | NA       | 0.160764 | NA       | 0        | NA       |
| AT1G14960 | AT1G14960 | 0        | 0        | 0        | 0        | 0        | 0        | 0        | 0        | 0.959536 | 0        | 0        | 0        | 0        | NA       | 0        | NA       | 0        | NA       |
| AT1G14970 | AT1G14970 | 45.17835 | 69.5856  | 73.3963  | 49.48987 | 51.00998 | 43.86099 | 49.80099 | 50.70783 | 35.14486 | 63.32935 | 54.54369 | 75.62118 | -0.34378 | 0.245768 | -0.43573 | 0.162749 | 0.058359 | 0.933182 |
| AT1G14980 | CPN10     | 54.2934  | 394.3454 | 435.0909 | 708.1175 | 665.7796 | 550.2561 | 330.8209 | 380.8481 | 757.5669 | 391.4905 | 301.9858 | 468.2298 | 0.719847 | 0.009635 | 0.348564 | 0.274615 | 0.028892 | 0.975074 |
| AT1G14990 | AT1G14990 | 35.66712 | 33.90067 | 46.35556 | 76.35896 | 73.53387 | 53.8294  | 63.14025 | 39.91893 | 64.43224 | 44.13864 | 35.01902 | 44.54398 | 0.791084 | 0.006272 | 0.495534 | 0.132236 | 0.094318 | 0.896393 |
| AT1G15000 | SCPL50    | 108.1903 | 123.113  | 135.2037 | 73.40997 | 70.22153 | 53.8294  | 32.90423 | 63.65451 | 60.52725 | 95.95356 | 78.4897  | 101.5188 | -0.83777 | 0.00065  | -1.175   | 3.25E-06 | -0.38501 | 0.350394 |
| AT1G15002 | AT1G15002 | 1.188904 | 0        | 0        | 1.237247 | 1.987402 | 0        | 0        | 0        | 0        | 0        | 1.330334 | 1.035907 | 0.363008 | NA       | -0.27011 | NA       | 0.150961 | NA       |
| AT1G15010 | AT1G15010 | 7.133424 | 10.70548 | 9.01358  | 63.512   | 49.68505 | 57.81677 | 99.60199 | 111.1257 | 141.5557 | 11.51443 | 6.65167  | 11.39497 | 2.373691 | 8.48E-12 | 2.373919 | 2.22E-23 | 0.114754 | 0.913327 |
| AT1G15015 | AT1G15015 | 0        | 0        | 1.287654 | 0.412416 | 0.662467 | 0.996841 | 1.778607 | 1.07889  | 0        | 0        | 1.330334 | 0        | 0.101565 | NA       | 0.257828 | NA       | -0.04221 | NA       |
| AT1G15020 | QSOX1     | 212.8138 | 305.1061 | 279.421  | 284.5667 | 281.5486 | 294.068  | 245.4478 | 268.6436 | 172.7955 | 241.803  | 270.0578 | 261.0484 | 0.113321 | 0.626165 | -0.20383 | 0.380079 | -0.03828 | 0.9394   |
| AT1G15030 | AT1G15030 | 420.872  | 451.4142 | 439.0901 | 366.6374 | 357.7323 | 437.6131 | 348.607  | 349.5603 | 322.1612 | 425.0743 | 492.2236 | 333.5619 | -0.17455 | 0.346712 | -0.35425 | 0.046598 | -0.06917 | 0.856443 |
| AT1G15040 | AT1G15040 | 2.377808 | 0        | 1.287654 | 6.186234 | 5.299738 | 4.984204 | 8.893035 | 15.10446 | 3.904984 | 0.959536 | 1.330334 | 2.071813 | 1.089601 | 0.086277 | 1.636631 | 0.008231 | -0.01608 | NA       |
| AT1G15045 | AT1G15045 | 0        | 0        | 0        | 0        | 0        | 0.889303 | 0        | 0        | 0        | 0        | 0        | 0        | 0        | NA       | 0.160764 | NA       | 0        | NA       |
| AT1G15050 | IAA3      | 3.566712 | 1.784246 | 2.575309 | 0        | 0.662467 | 0.996841 | 0        | 0        | 4.797678 | 3.991002 | 3.10772  | 0        | -1.03307 | 0.117098 | -1.23914 | 0.057187 | 0.393924 | NA       |
| AT1G15060 | AT1G15060 | 256.8033 | 253.3629 | 287.1469 | 181.8753 | 201.3901 | 166.4724 | 176.0821 | 168.3068 | 150.3419 | 236.0548 | 184.9164 | 217.5404 | -0.52453 | 0.001107 | -0.67714 | 3.77E-05 | -0.3104  | 0.225684 |
| AT1G15080 | LPP2      | 23.77808 | 17.84246 | 20.60247 | 31.756   | 36.4357  | 40.87047 | 34.68284 | 37.76115 | 34.16861 | 28.78607 | 29.26735 | 30.04129 | 0.708518 | 0.032431 | 0.693259 | 0.050466 | 0.436101 | 0.462976 |
| AT1G15090 | AT1G15090 |          |          |          |          |          |          |          |          |          |          |          |          |          |          |          |          |          |          |

|           |           |          |          |          |          |          |          |          |          |          |          |          |          |          |          |          |          |          |          |
|-----------|-----------|----------|----------|----------|----------|----------|----------|----------|----------|----------|----------|----------|----------|----------|----------|----------|----------|----------|----------|
| AT1G15550 | GA3OX1    | 54.68958 | 30.33218 | 42.49259 | 7.42348  | 4.637271 | 0.996841 | 6.225124 | 6.47334  | 9.76246  | 32.62421 | 33.25835 | 40.40035 | -2.70466 | 3.01E-12 | -2.20601 | 3.19E-08 | -0.25493 | 0.732248 |
| AT1G15560 | AT1G15560 | 0        | 0        | 0        | 0        | 0        | 0        | 0        | 0        | 0.976246 | 0        | 1.330334 | 0        | 0        | NA       | 0.150797 | NA       | 0.184203 | 0        |
| AT1G15570 | CYCA2-3   | 142.6685 | 108.839  | 103.0123 | 124.1371 | 138.4557 | 142.5482 | 120.9453 | 132.7035 | 72.2422  | 107.468  | 98.44471 | 135.7038 | 0.175739 | 0.543196 | -0.1238  | 0.705231 | -0.05345 | 0.933182 |
| AT1G15580 | IAA5      | 14.26685 | 24.97944 | 34.76667 | 16.08421 | 19.87402 | 11.96209 | 12.45025 | 10.7889  | 13.66744 | 30.70514 | 29.26735 | 30.04129 | -0.53393 | 0.19721  | -0.86834 | 0.043818 | 0.27265  | 0.72091  |
| AT1G15590 | AT1G15590 | 0        | 0        | 0        | 0        | 0        | 0.996841 | 0        | 0        | 0        | 0        | 0        | 0        | 0.15625  | NA       | 0        | NA       | 0        | NA       |
| AT1G15600 | AT1G15600 | 0        | 0        | 0        | 0        | 0        | 0        | 0        | 0        | 0        | 0        | 0        | 0        | #N/A     | #N/A     | #N/A     | #N/A     | #N/A     | #N/A     |
| AT1G15610 | AT1G15610 | 0        | 0        | 0        | 0.412416 | 0.662467 | 0        | 0        | 0        | 0        | 0        | 0        | 0        | 0.196313 | NA       | 0        | NA       | 0        | NA       |
| AT1G15620 | AT1G15620 | 0        | 0        | 0        | 0.824831 | 0        | 0        | 1.07889  | 0        | 0.959536 | 0        | 1.035907 | 0        | 0.151711 | NA       | 0.165487 | NA       | 0.335256 | NA       |
| AT1G15630 | AT1G15630 | 0        | 1.784246 | 0        | 5.361402 | 4.637271 | 7.974726 | 1.778607 | 0        | 0.959536 | 0        | 0        | 0        | 1.662661 | 0.006878 | 0.005456 | 0.994894 | -0.12557 | NA       |
| AT1G15640 | AT1G15640 | 1.188904 | 0        | 0        | 0.412416 | 1.987402 | 2.990522 | 0.889303 | 0        | 0        | 0        | 0        | 0        | 0.608494 | NA       | -0.08383 | NA       | -0.26028 | NA       |
| AT1G15650 | AT1G15650 | 0        | 0        | 0        | 0        | 0        | 0        | 0        | 0        | 0        | 0        | 0        | 0        | #N/A     | #N/A     | #N/A     | #N/A     | #N/A     | #N/A     |
| AT1G15660 | CENP-C    | 168.8244 | 110.6233 | 141.642  | 141.4585 | 141.768  | 125.6019 | 147.6244 | 128.3879 | 116.1733 | 143.9303 | 145.0064 | 138.8115 | -0.05177 | 0.836831 | -0.11408 | 0.653371 | 0.005326 | 0.992616 |
| AT1G15670 | AT1G15670 | 66.57862 | 57.09587 | 51.50617 | 282.5047 | 275.5864 | 279.1154 | 233.8868 | 233.0402 | 344.6148 | 38.38143 | 35.91902 | 51.79533 | 2.173193 | 3.08E-24 | 2.127777 | 6.39E-23 | -0.44579 | 0.293983 |
| AT1G15680 | AT1G15680 | 0        | 0        | 0        | 0        | 0        | 0        | 0        | 0        | 0        | 0        | 0        | 0        | #N/A     | #N/A     | #N/A     | #N/A     | #N/A     | #N/A     |
| AT1G15690 | AVP1      | 7742.142 | 5691.745 | 5311.574 | 2980.527 | 3181.83  | 3634.481 | 4652.836 | 4873.346 | 4605.929 | 4928.175 | 5165.687 | 4766.206 | -0.92263 | 2.08E-10 | -0.40166 | 0.011823 | -0.33038 | 0.146425 |
| AT1G15700 | ATPC2     | 86.78999 | 53.52738 | 86.27284 | 58.1506  | 52.33491 | 56.81992 | 57.80473 | 55.02339 | 65.40848 | 87.31774 | 79.82004 | 72.51346 | -0.44331 | 0.075465 | -0.35511 | 0.19962  | 0.056434 | 0.925908 |
| AT1G15710 | TYRAAT2   | 150.9908 | 94.56504 | 97.86173 | 83.30795 | 78.17114 | 84.73147 | 92.48756 | 80.91675 | 84.9334  | 105.5489 | 107.7571 | 82.87252 | -0.47904 | 0.039257 | -0.40821 | 0.106491 | -0.22297 | 0.602936 |
| AT1G15720 | RF15      | 29.7226  | 21.41095 | 18.02716 | 21.44561 | 28.48609 | 29.90522 | 26.6791  | 34.52448 | 31.23987 | 23.98839 | 27.93701 | 30.04129 | 0.148478 | 0.731632 | 0.365476 | 0.376978 | 0.205776 | 0.784082 |
| AT1G15730 | AT1G15730 | 537.3846 | 551.332  | 454.542  | 244.9749 | 268.9617 | 263.166  | 314.8134 | 319.3514 | 399.2846 | 516.2302 | 445.6619 | 510.7019 | -0.97555 | 7.43E-12 | -0.56775 | 0.000164 | -0.06212 | 0.858201 |
| AT1G15740 | AT1G15740 | 1712.022 | 1975.16  | 1792.415 | 1425.721 | 1407.08  | 1462.365 | 1847.973 | 1717.593 | 1285.716 | 1468.09  | 1392.86  | 1549.716 | -0.3457  | 0.02106  | -0.17212 | 0.316324 | -0.30731 | 0.161326 |
| AT1G15750 | TPL       | 1455.218 | 1307.852 | 1206.532 | 1035.163 | 916.1922 | 1264.991 | 1094.733 | 1365.875 | 741.947  | 1008.472 | 995.0898 | 1003.793 | -0.29647 | 0.184224 | -0.30175 | 0.195811 | -0.38941 | 0.220246 |
| AT1G15757 | AT1G15757 | 0        | 0        | 0        | 0        | 0        | 0        | 0        | 0        | 0        | 0        | 0        | 0        | #N/A     | #N/A     | #N/A     | #N/A     | #N/A     | #N/A     |
| AT1G15760 | AT1G15760 | 8.322328 | 5.352738 | 15.45185 | 10.31039 | 13.24935 | 11.96209 | 5.335821 | 7.55223  | 11.71495 | 8.635821 | 5.321336 | 8.287252 | 0.209899 | 0.73125  | -0.22892 | 0.732823 | -0.31659 | NA       |
| AT1G15770 | MED158    | 1.188904 | 0        | 0        | 0        | 0        | 0        | 0        | 1.07889  | 0        | 0.959536 | 0        | 0        | -0.24564 | NA       | -0.03069 | NA       | -0.03478 | NA       |
| AT1G15772 | AT1G15772 | 0        | 1.784246 | 0        | 0        | 1.324935 | 0        | 0.889303 | 0        | 2.928738 | 0        | 2.660668 | 2.071813 | -0.08895 | 0.903683 | 0.302623 | 0.66305  | 0.380485 | NA       |
| AT1G15780 | MED15A    | 612.2855 | 488.8834 | 436.5148 | 319.6221 | 282.2111 | 367.8342 | 413.5261 | 487.6583 | 249.919  | 403.9645 | 464.2866 | 359.4596 | -0.64432 | 0.006056 | -0.40443 | 0.117136 | -0.31547 | 0.432612 |
| AT1G15790 | AT1G15790 | 76.08985 | 94.56504 | 72.10864 | 302.713  | 323.9465 | 296.0617 | 153.8495 | 132.7035 | 176.7005 | 54.69353 | 49.22236 | 36.25673 | 1.89727  | 1.72E-24 | 0.921193 | 5.95E-06 | -0.74152 | 0.104083 |
| AT1G15800 | AT1G15800 | 38.04493 | 42.8219  | 36.05432 | 94.85558 | 77.50867 | 81.74094 | 104.0485 | 89.54786 | 109.3396 | 37.42189 | 47.89202 | 27.96948 | 1.085251 | 1.54E-05 | 1.323144 | 1.31E-07 | -0.05548 | 0.940326 |
| AT1G15810 | AT1G15810 | 209.2471 | 228.3835 | 220.1889 | 262.2962 | 278.8987 | 238.2449 | 242.7799 | 263.2491 | 295.8025 | 199.5834 | 159.6401 | 190.6068 | 0.248037 | 0.145945 | 0.283247 | 0.110946 | -0.24413 | 0.380705 |
| AT1G15820 | LHC6      | 24863.55 | 29274.12 | 25659.09 | 11400.82 | 10306    | 10106.97 | 6989.036 | 8285.875 | 14596.83 | 27191.32 | 22662.24 | 23695.33 | -1.28143 | 2.18E-09 | -1.36919 | 1.39E-10 | -0.11362 | 0.819853 |
| AT1G15825 | AT1G15825 | 23.77808 | 14.27397 | 10.30123 | 3.299325 | 3.974804 | 4.984204 | 0        | 1.07889  | 1.952492 | 21.10978 | 9.312338 | 12.43088 | -1.6109  | 0.001728 | -2.49362 | 4.9E-06  | -0.12523 | NA       |
| AT1G15830 | AT1G15830 | 126.0238 | 108.839  | 81.12222 | 34.64291 | 13.24935 | 33.89259 | 12.45025 | 26.97225 | 26.35864 | 80.60099 | 55.87403 | 83.90843 | -1.78998 | 4.88E-08 | -2.06725 | 1.27E-09 | -0.47546 | 0.404471 |
| AT1G15840 | AT1G15840 | 1.188904 | 1.784246 | 0        | 0.412416 | 0        | 0        | 0        | 0        | 0        | 0        | 0        | 0        | -0.38524 | NA       | -0.48588 | NA       | -0.47705 | NA       |
| AT1G15850 | AT1G15850 | 0        | 0        | 1.287654 | 0        | 0        | 0        | 0        | 0        | 0        | 0        | 0        | 0        | -0.2184  | NA       | -0.20558 | NA       | -0.19198 | NA       |
| AT1G15860 | AT1G15860 | 306.7372 | 363.9862 | 327.0642 | 476.7524 | 493.5381 | 450.572  | 449.9876 | 367.9015 | 399.2846 | 408.7622 | 340.5655 | 350.1364 | 0.510204 | 0.000328 | 0.289907 | 0.068767 | 0.146335 | 0.597256 |
| AT1G15870 | AT1G15870 | 17.83356 | 12.48972 | 12.87654 | 25.56977 | 25.83622 | 26.9147  | 13.33955 | 14.02557 | 13.66744 | 22.06932 | 14.63367 | 19.68222 | 0.756749 | 0.054603 | -0.09083 | 0.875386 | 0.334664 | 0.667756 |
| AT1G15880 | GOS11     | 310.3039 | 422.8663 | 359.2556 | 398.8059 | 379.5937 | 386.7742 | 340.6032 | 383.0059 | 384.6409 | 288.0202 | 303.3161 | 311.8079 | 0.102096 | 0.552438 | 0.028566 | 0.890464 | -0.26074 | 0.629656 |
| AT1G15885 | AT1G15885 | 23.77808 | 26.76369 | 30.9037  | 45.77813 | 52.99738 | 34.88943 | 45.35448 | 38.84004 | 65.40848 | 39.34096 | 30.59768 | 34.18492 | 0.675187 | 0.040583 | 0.815066 | 0.015661 | 0.330188 | 0.595848 |
| AT1G15890 | AT1G15890 | 67.76752 | 71.36984 | 65.67037 | 81.24587 | 78.83361 | 93.70303 | 141.3993 | 105.7312 | 115.197  | 51.81492 | 55.87403 | 51.79533 | 0.292678 | 0.23165  | 0.802633 | 0.000256 | -0.34633 | 0.397112 |
| AT1G15900 | AT1G15900 | 3.566712 | 3.568492 | 2.575309 | 2.886909 | 5.962205 | 0.996841 | 1.778607 | 2.15778  | 3.094984 | 4.797678 | 5.321336 | 1.035907 | 0.047869 | 0.955141 | -0.17432 | 0.839608 | 0.11805  | NA       |
| AT1G15910 | FDM1      | 330.5153 | 212.3253 | 235.6407 | 160.0172 | 168.2667 | 160.9142 | 152.9602 | 206.068  | 162.0568 | 262.6123 | 211.5231 | 241.3662 | -0.66361 | 0.000549 | -0.57649 | 0.004258 | 0.206875 | 0.565684 |
| AT1G15920 | CAF1-2    | 271.0701 | 251.5787 | 234.3531 | 177.3387 | 201.3901 | 214.3208 | 254.3408 | 242.7502 | 277.2539 | 230.2886 | 235.4691 | 261.0484 | -0.35808 | 0.023714 | 0.031852 | 0.885383 | -0.05833 | 0.874236 |
| AT1G15930 | RP512A    | 1601.454 | 1687.897 | 1630.17  | 2008.051 | 2139.769 | 1758.427 | 1188.999 | 1445.713 | 1978.851 | 1640.806 | 1543.187 | 1489.634 | 0.259235 | 0.174092 | -0.09073 | 0.694627 | -0.0721  | 0.860039 |
| AT1G15940 | AT1G15940 | 456.5391 | 363.9862 | 324.4889 | 291.1654 | 292.8105 | 336.9322 | 360.1679 | 421.846  | 368.8049 | 321.4444 | 357.8598 | 399.8599 | -0.31503 | 0.084466 | -0.03666 | 0.882284 | -0.08705 | 0.821978 |
| AT1G15950 | CCR1      | 602.7743 | 628.0546 | 602.6222 | 548.5127 | 443.1906 | 531.3161 | 303.2525 | 391.637  | 318.2562 | 494.1608 | 468.2776 | 416.4344 | -0.26218 | 0.097004 | -0.8442  | 6.63E-09 | -0.40401 | 0.049488 |
| AT1G15960 | NRAMP6    | 103.4346 | 324.2386 | 87.5605  | 77.12171 | 54.32232 | 56.81992 | 63.10559 | 52.86561 | 28.31113 | 105.5489 | 121.0604 | 106.6984 | -0.41555 | 0.172192 | -0.78439 | 0.009267 | 0.350851 | 0.47565  |
| AT1G15970 | AT1G15970 | 153.3686 | 144.5239 | 154.5185 | 141.871  | 162.9669 | 149.5261 | 142.2886 | 121.9146 | 168.8906 | 179.4332 | 143.6761 | 154.3501 | 0.000722 | 0.998289 | -0.06219 | 0.811671 | 0.07859  | 0.856796 |
| AT1G15980 | PNSB1     | 1791.678 | 1951.965 | 1800.141 | 712.2417 | 751.9004 | 801.46   | 1298.383 | 1362.638 | 1374.554 | 1964.169 | 1874.441 | 1914.355 | -1.28526 | 1.38E-46 | -0.45411 | 1.44E-06 | 0.055032 | 0.790019 |
| AT1G15990 | ATCGNC7   | 0        | 0        | 2.575309 | 0.824831 | 1.324935 | 0        | 1.778607 | 0        | 2.928738 | 0        | 1.330334 | 1.035907 | -0.08062 | 0.917913 | 0.279439 | 0.706436 | -0.06701 | NA       |
| AT1G16000 | AT1G16000 | 92.73451 | 94.56504 | 91.42346 | 215.2809 | 178.8662 | 130.5861 | 104.4885 | 101.4157 | 200.330  | 112.2657 | 105.0964 | 107.7343 | 0.875511 | 0.004946 | 0.521213 | 0.094956 | 0.209956 | 0.711972 |
| AT1G16010 | MRS1-1    | 403.0384 | 392.5341 | 400.4605 | 455.3068 | 378.9313 | 516.3635 | 459.7699 | 513.5516 | 428.572  | 388.6119 | 376.4845 | 331.4901 | 0.168423 | 0.33493  | 0.152114 | 0.207613 | -0.12423 | 0.691846 |
| AT1G16020 | AT1G16020 | 185.469  | 189.1301 | 193.1482 | 147.6448 | 125.2063 | 142.5482 | 137.842  | 138.0979 | 146.7369 | 164.0806 | 142.3457 | 186.4632 | -0.43968 | 0.010368 | -0.41792 | 0.022407 | -0.19349 | 0.539079 |
| AT1G16022 | AT1G16022 | 0        | 0        | 0.412416 | 0        | 0        | 0        | 0        | 0        | 0.976246 | 0.959536 | 0        | 0        | 0.06603  | NA       | 0.151707 | NA       | 0.160871 | NA       |
| AT1G16025 |           |          |          |          |          |          |          |          |          |          |          |          |          |          |          |          |          |          |          |

|           |           |           |          |           |          |          |          |          |          |          |          |          |          |          |          |          |          |          |          |
|-----------|-----------|-----------|----------|-----------|----------|----------|----------|----------|----------|----------|----------|----------|----------|----------|----------|----------|----------|----------|----------|
| AT1G16520 | AT1G16520 | 115.3237  | 112.4075 | 93.99877  | 137.3344 | 145.7428 | 138.5609 | 127.1704 | 142.4135 | 114.2208 | 149.6876 | 145.0064 | 135.7038 | 0.382797 | 0.044031 | 0.247786 | 0.256191 | 0.412048 | 0.139131 |
| AT1G16530 | LBD3      | 8.322328  | 10.70548 | 9.01358   | 10.7228  | 9.274542 | 10.96525 | 4.446517 | 8.63112  | 12.6912  | 12.47396 | 9.312338 | 11.39497 | 0.130347 | 0.834631 | -0.09808 | 0.889016 | 0.222799 | NA       |
| AT1G16540 | ABAB      | 101.0568  | 103.4863 | 123.6148  | 153.4186 | 121.2315 | 150.523  | 188.5323 | 172.6224 | 126.912  | 95.95356 | 106.4267 | 109.8061 | 0.360465 | 0.110597 | 0.554372 | 0.012791 | -0.0744  | 0.886984 |
| AT1G16550 | AT1G16550 | 51.12287  | 49.95889 | 54.08148  | 21.03319 | 19.21155 | 25.91786 | 32.90423 | 34.52448 | 17.57243 | 43.1791  | 50.55269 | 30.04129 | -1.1645  | 0.000176 | -0.81075 | 0.015727 | -0.31595 | 0.590219 |
| AT1G16560 | AT1G16560 | 345.971   | 401.4554 | 370.8445  | 503.5594 | 472.3392 | 468.5152 | 337.9353 | 374.3748 | 348.5198 | 319.5254 | 336.5745 | 343.921  | 0.373817 | 0.002902 | -0.07133 | 0.673033 | -0.15495 | 0.510598 |
| AT1G16570 | AT1G16570 | 99.86793  | 121.3287 | 90.1358   | 141.0461 | 120.569  | 127.5956 | 123.6132 | 106.8101 | 72.2422  | 98.83217 | 95.78405 | 109.8061 | 0.326888 | 0.187841 | -0.02678 | 0.936038 | -0.01879 | 0.977933 |
| AT1G16590 | REV7      | 27.34479  | 49.95889 | 39.91728  | 57.32576 | 44.38531 | 43.86099 | 26.6791  | 34.52448 | 38.07359 | 29.7456  | 21.28534 | 35.22082 | 0.338588 | 0.327623 | -0.20117 | 0.629185 | -0.36771 | 0.540476 |
| AT1G16600 | AT1G16600 | 0         | 0        | 0         | 0        | 0        | 1.324935 | 0        | 0.889303 | 0        | 0        | 0        | 0        | 0.194769 | NA       | 0.126571 | NA       | 0        | NA       |
| AT1G16610 | SR45      | 366.1824  | 264.0684 | 221.4765  | 304.3627 | 325.2714 | 241.2355 | 216.99   | 290.2214 | 377.8072 | 186.1499 | 167.6221 | 222.7199 | 0.031515 | 0.925115 | 0.049651 | 0.885767 | -0.54057 | 0.134038 |
| AT1G16620 | AT1G16620 | 19.02246  | 8.92123  | 9.13148   | 9.073143 | 15.23675 | 8.971567 | 12.45025 | 4.31556  | 11.71495 | 13.4325  | 22.61568 | 10.35997 | -0.452   | 0.39271  | -0.61283 | 0.265766 | -0.07026 | NA       |
| AT1G16630 | AT1G16630 | 102.2457  | 66.0171  | 83.69753  | 89.9066  | 92.08295 | 105.6651 | 86.26244 | 101.4157 | 82.98091 | 118.9824 | 138.3547 | 95.3034  | 0.156516 | 0.563597 | 0.077669 | 0.809102 | 0.44318  | 0.209108 |
| AT1G16635 | AT1G16635 | 1.188904  | 0        | 0         | 0.824831 | 1.324935 | 1.993682 | 0.889303 | 0        | 4.88123  | 0        | 0        | 0        | 0.403468 | 0.543105 | 0.612535 | 0.347843 | -0.26246 | NA       |
| AT1G16640 | AT1G16640 | 19.02246  | 5.352738 | 9.01358   | 23.09527 | 15.89921 | 12.95893 | 8.893035 | 6.83112  | 18.54867 | 12.47396 | 13.30334 | 7.251346 | 0.518819 | 0.327962 | 0.042275 | 0.951962 | -0.06793 | NA       |
| AT1G16650 | AT1G16650 | 77.27876  | 60.66437 | 74.68395  | 98.15491 | 96.05775 | 100.6809 | 122.7239 | 121.9146 | 103.4821 | 83.4796  | 83.81104 | 66.29802 | 0.440253 | 0.044789 | 0.675471 | 0.001842 | 0.112126 | 0.820936 |
| AT1G16660 | AT1G16660 | 0         | 0        | 0         | 0        | 0        | 1.324935 | 0        | 0.889303 | 1.07889  | 0        | 0.959536 | 0        | 0.212382 | NA       | 0.323045 | NA       | 0.393145 | NA       |
| AT1G16670 | AT1G16670 | 129.5905  | 173.0719 | 139.0667  | 282.5047 | 320.6342 | 310.0175 | 227.6617 | 188.8057 | 209.8299 | 82.52006 | 62.5257  | 114.9856 | 1.031031 | 8.5E-08  | 0.502348 | 0.020211 | -0.71468 | 0.009697 |
| AT1G16680 | AT1G16680 | 325.7597  | 353.2807 | 301.3111  | 244.5624 | 272.274  | 217.3113 | 227.6617 | 276.1958 | 273.3489 | 307.0514 | 270.0578 | 282.8025 | -0.40194 | 0.01052  | -0.32796 | 0.052657 | -0.17965 | 0.52809  |
| AT1G16690 | AT1G16690 | 70.14533  | 55.31163 | 61.80741  | 55.26369 | 61.60946 | 52.83256 | 61.36194 | 58.26006 | 55.64602 | 54.69353 | 42.57069 | 60.08258 | -0.14461 | 0.620694 | -0.1018  | 0.760851 | -0.23984 | 0.613587 |
| AT1G16700 | AT1G16700 | 389.9605  | 453.1983 | 503.4728  | 715.1286 | 716.1271 | 607.076  | 537.1393 | 445.5815 | 669.7048 | 430.8315 | 521.4909 | 337.1526 | 0.588258 | 0.000959 | 0.290406 | 0.152618 | 0.042766 | 0.926068 |
| AT1G16705 | AT1G16705 | 4.755616  | 1.784246 | 3.862963  | 0.824831 | 0        | 0.996841 | 0        | 0.107889 | 2.928738 | 7.67285  | 6.516297 | 2.071813 | -1.15252 | 0.079523 | -0.71034 | 0.332931 | 0.42455  | NA       |
| AT1G16710 | HAC12     | 593.2631  | 519.2156 | 426.2136  | 255.2852 | 255.7124 | 352.8816 | 398.408  | 428.3193 | 278.301  | 396.2882 | 403.0912 | 409.1831 | -0.81715 | 0.00035  | -0.46545 | 0.030805 | -0.33929 | 0.299464 |
| AT1G16720 | HF173     | 213.7005  | 2528.277 | 2303.614  | 1219.925 | 1083.134 | 1276.953 | 1855.628 | 1800.667 | 1731.626 | 2476.561 | 2161.793 | 2290.389 | -0.94743 | 3.25E-13 | -0.51499 | 7.53E-05 | -0.00527 | 0.988934 |
| AT1G16730 | UP6       | 58.25629  | 62.44861 | 47.64321  | 58.56301 | 54.98478 | 39.87363 | 37.35075 | 24.81447 | 40.02609 | 102.6703 | 90.46271 | 78.7289  | -0.09658 | 0.77973  | -0.66257 | 0.028245 | 0.672584 | 0.068488 |
| AT1G16740 | AT1G16740 | 154.5575  | 187.3458 | 181.5593  | 369.1119 | 347.7953 | 184.4155 | 233.8868 | 202.8313 | 391.4746 | 215.8955 | 187.5771 | 194.7504 | 0.750373 | 0.007999 | 0.628494 | 0.035503 | 0.184481 | 0.75415  |
| AT1G16750 | AT1G16750 | 59.4452   | 73.15409 | 91.42346  | 63.92441 | 51.67245 | 55.82308 | 85.25124 | 84.15342 | 44.90732 | 95.95356 | 107.7571 | 103.5907 | -0.3596  | 0.208934 | -0.22101 | 0.500509 | 0.451003 | 0.274581 |
| AT1G16760 | AT1G16760 | 0         | 0        | 0         | 0        | 0        | 0        | 1.778607 | 0        | 0        | 0        | 0        | 0        | -0.45434 | NA       | -0.14207 | NA       | -0.41988 | NA       |
| AT1G16770 | AT1G16770 | 2.377808  | 3.568492 | 0         | 2.474493 | 3.974804 | 1.993682 | 1.778607 | 4.31556  | 4.88123  | 3.838143 | 0        | 2.071813 | 0.29067  | 0.709485 | 0.495332 | 0.519103 | 0.053943 | NA       |
| AT1G16780 | VHP2      | 196.1692  | 157.0137 | 181.5593  | 85.78244 | 68.23413 | 94.69987 | 98.71269 | 137.019  | 66.38473 | 169.8378 | 127.7121 | 155.386  | -1.06819 | 8.47E-06 | -0.79829 | 0.001584 | -0.22975 | 0.622741 |
| AT1G16790 | AT1G16790 | 38.04493  | 42.8219  | 52.79383  | 57.32576 | 59.62205 | 60.80729 | 38.24005 | 42.07671 | 74.1947  | 47.01725 | 53.21336 | 54.90305 | 0.384535 | 0.265338 | 0.193984 | 0.01013  | 0.197771 | 0.750218 |
| AT1G16800 | AT1G16800 | 107.0014  | 126.6815 | 99.14938  | 47.84021 | 43.06037 | 64.79465 | 60.47264 | 77.68008 | 53.69353 | 91.15588 | 91.79304 | 94.40703 | -1.07274 | 1.58E-06 | -0.76188 | 0.001375 | -0.21857 | 0.613494 |
| AT1G16810 | AT1G16810 | 636.0636  | 706.5614 | 813.7975  | 1349.424 | 1438.879 | 1020.765 | 1088.507 | 863.112  | 1451.678 | 897.1658 | 1359.601 | 831.8239 | 0.791268 | 0.000652 | 0.63391  | 0.009093 | 0.497377 | 0.15612  |
| AT1G16820 | AT1G16820 | 16.64466  | 16.05821 | 9.01358   | 23.9201  | 23.18635 | 18.93997 | 19.56468 | 18.34113 | 23.4299  | 17.2164  | 10.64267 | 15.5386  | 0.613772 | 0.145788 | 0.496729 | 0.291396 | 0.073599 | 0.947496 |
| AT1G16825 | RTNLB23   | 13.07794  | 12.48972 | 21.89012  | 18.97112 | 23.18635 | 7.94726  | 17.78607 | 14.02557 | 13.23987 | 16.31211 | 6.65167  | 16.5745  | 0.087131 | 0.887538 | 0.340472 | 0.552882 | -0.20363 | 0.851049 |
| AT1G16830 | AT1G16830 | 17.78356  | 16.05821 | 15.45185  | 16.49662 | 17.88862 | 17.94313 | 19.56468 | 17.26224 | 19.54292 | 12.47396 | 19.95501 | 23.82585 | 0.061477 | 0.907332 | 0.167975 | 0.752814 | 0.152451 | 0.869575 |
| AT1G16840 | AT1G16840 | 315.0595  | 299.7533 | 296.1605  | 386.4334 | 450.4777 | 357.8658 | 409.9689 | 390.5582 | 464.6931 | 259.0746 | 231.4781 | 294.1975 | 0.386447 | 0.014554 | 0.465874 | 0.00355  | -0.20885 | 0.458722 |
| AT1G16850 | AT1G16850 | 21.40027  | 24.97944 | 18.02716  | 21.03319 | 11.92441 | 16.94629 | 9.782338 | 14.02557 | 29.28738 | 23.02886 | 15.96401 | 14.50269 | -0.29425 | 0.560736 | -0.2327  | 0.678688 | -0.21114 | 0.829037 |
| AT1G16858 | CPuORF55  | 0         | 0        | 0         | 0        | 0        | 0        | 0        | 0        | 0        | 0        | 0        | 0        | #N/A     | #N/A     | #N/A     | #N/A     | #N/A     | #N/A     |
| AT1G16860 | AT1G16860 | 0         | 0        | 0         | 0        | 0        | 0        | 0        | 0        | 0        | 0        | 0        | 0        | #N/A     | #N/A     | #N/A     | #N/A     | #N/A     | #N/A     |
| AT1G16870 | AT1G16870 | 192.6024  | 251.5787 | 172.5457  | 222.292  | 210.6646 | 182.4219 | 235.6654 | 215.778  | 224.5366 | 201.5025 | 186.2468 | 254.833  | 0.014177 | 0.955072 | 0.14142  | 0.55111  | 0.07245  | 0.870405 |
| AT1G16880 | ACR11     | 3024.5732 | 3059.982 | 2956.544  | 2512.848 | 2645.894 | 2465.187 | 4181.505 | 4229.249 | 4222.264 | 3411.149 | 3699.659 | 3216.49  | -0.24417 | 0.000859 | 0.480301 | 3.08E-08 | 0.190438 | 0.16306  |
| AT1G16890 | UBC36     | 571.8628  | 617.3491 | 706.9222  | 976.6001 | 976.4768 | 796.4758 | 748.7935 | 712.0674 | 781.7877 | 624.5571 | 752.969  | 697.1651 | 0.530449 | 0.000383 | 0.29439  | 0.076636 | 0.126012 | 0.676985 |
| AT1G16900 | ALG9      | 177.1467  | 205.1883 | 171.258   | 256.1101 | 209.3397 | 238.2449 | 257.898  | 263.2491 | 174.748  | 169.8378 | 151.6581 | 127.4165 | 0.34436  | 0.109119 | 0.326258 | 0.15378  | -0.28735 | 0.424257 |
| AT1G16905 | AT1G16905 | 0         | 0        | 0         | 0.412416 | 0.662467 | 0        | 0        | 1.07889  | 0        | 0        | 0        | 0        | 0.209628 | NA       | 0.176186 | NA       | 0        | NA       |
| AT1G16910 | LSH8      | 2.377808  | 0        | 2.575309  | 0.412416 | 0        | 0        | 1.07889  | 1.952492 | 0.959536 | 1.330334 | 2.071813 | 0        | -0.85025 | 0.179446 | -0.2985  | 0.695283 | -0.09685 | NA       |
| AT1G16916 | AT1G16916 | 36.85602  | 23.1952  | 30.9037   | 55.26369 | 62.27192 | 39.87363 | 43.57587 | 35.60337 | 136.7644 | 37.42189 | 47.89202 | 50.75942 | 0.676959 | 0.12583  | 1.07605  | 0.012254 | 0.482542 | 0.523739 |
| AT1G16920 | RABA11    | 224.7028  | 221.2651 | 245.26379 | 252.3983 | 249.0877 | 236.2513 | 391.2002 | 186.648  | 233.603  | 245.6411 | 192.8984 | 264.1562 | 0.075714 | 0.175586 | -0.21612 | 0.270086 | 0.010602 | 0.983524 |
| AT1G16930 | AT1G16930 | 77.27876  | 73.15409 | 84.98519  | 70.93548 | 71.54647 | 61.80413 | 94.26617 | 80.91675 | 53.69353 | 78.68192 | 87.80204 | 82.87252 | -0.19336 | 0.493324 | -0.04063 | 0.906807 | 0.072415 | 0.901337 |
| AT1G16940 | AT1G16940 | 0         | 1.784246 | 0         | 0        | 0        | 0        | 1.778607 | 1.07889  | 0        | 0        | 1.330334 | 1.035907 | -0.37637 | NA       | 0.234767 | NA       | 0.125921 | NA       |
| AT1G16950 | AT1G16950 | 57.06739  | 97.86173 | 97.86173  | 87.01969 | 101.3575 | 80.7441  | 122.7239 | 90.62675 | 142.5319 | 93.07496 | 123.7211 | 91.15977 | 0.390919 | 0.293355 | 0.695218 | 0.01101  | 0.484786 | 0.246344 |
| AT1G16960 | KU70      | 131.9683  | 132.0342 | 164.8198  | 218.5803 | 211.3271 | 215.3176 | 186.7537 | 182.3324 | 199.1542 | 109.3871 | 146.3367 | 146.0628 | 0.574579 | 0.000955 | 0.393681 | 0.040297 | -0.10341 | 0.979512 |
| AT1G16980 | ATTP52    | 0         | 0        | 0         | 0.662467 | 0.996841 | 2.66791  | 0        | 0.976246 | 0.959536 | 0        | 0        | 0        | 0.235649 | NA       |          |          |          |          |

|           |           |          |          |          |          |          |          |          |          |          |          |          |          |          |          |          |          |          |          |
|-----------|-----------|----------|----------|----------|----------|----------|----------|----------|----------|----------|----------|----------|----------|----------|----------|----------|----------|----------|----------|
| AT1G17450 | AT1G17450 | 280.5813 | 235.5205 | 226.6272 | 182.7001 | 199.4026 | 223.2923 | 231.2189 | 230.8824 | 147.4131 | 201.5025 | 167.6221 | 183.3555 | -0.29571 | 0.172705 | -0.28026 | 0.227064 | -0.41456 | 0.180174 |
| AT1G17455 | EFL4      | 66.57862 | 73.15409 | 63.09506 | 113.0019 | 141.768  | 49.69987 | 126.2811 | 79.83786 | 153.2706 | 81.56053 | 113.0784 | 103.9760 | 0.754069 | 0.005395 | 0.790494 | 0.004479 | 0.52384  | 0.217892 |
| AT1G17460 | TRFL3     | 66.57862 | 82.07532 | 77.25926 | 203.7333 | 220.6016 | 200.365  | 244.5585 | 189.8846 | 189.3917 | 92.11542 | 79.82004 | 79.7648  | 1.438765 | 1.58E-14 | 1.437659 | 4.03E-14 | 1.16354  | 0.126189 |
| AT1G17470 | DRG1      | 771.5987 | 806.4792 | 860.1531 | 685.8471 | 706.8526 | 723.7064 | 750.5721 | 808.0886 | 785.878  | 937.4663 | 826.1374 | 899.1669 | -0.20421 | 0.074541 | -0.05658 | 0.694191 | 0.128225 | 0.515143 |
| AT1G17480 | IDQ7      | 53.50068 | 51.74313 | 37.34198 | 62.68717 | 68.8966  | 56.81992 | 48.91169 | 42.07671 | 49.78855 | 57.57214 | 70.5077  | 38.32854 | 0.392181 | 0.188625 | -0.11617 | 0.977976 | 0.201796 | 0.728155 |
| AT1G17490 | AT1G17490 | 40.02247 | 51.74313 | 60.51975 | 132.7978 | 135.1433 | 91.70935 | 86.26244 | 97.10009 | 194.273  | 79.64146 | 61.19536 | 78.7289  | 1.155911 | 0.000205 | -0.12137 | 0.00012  | 0.486441 | 0.368903 |
| AT1G17495 | AT1G17495 | 0        | 0        | 0        | 0.412416 | 0        | 0        | 0        | 0        | 0        | 0.995936 | 0        | 0        | 0.066171 | NA       | 0        | NA       | 0.145274 | NA       |
| AT1G17500 | ALA4      | 355.4823 | 303.3218 | 275.558  | 301.8882 | 317.3218 | 425.651  | 289.9129 | 323.667  | 218.6791 | 231.2481 | 232.8084 | 244.4739 | 0.149321 | 0.519509 | -0.1652  | 0.499254 | -0.38995 | 0.205441 |
| AT1G17510 | AT1G17510 | 61.82301 | 58.88012 | 45.0679  | 82.89553 | 111.2945 | 83.73463 | 68.47637 | 75.5223  | 102.5058 | 61.41028 | 65.18636 | 65.26211 | 0.71566  | 0.005076 | 0.546449 | 0.050465 | 0.199524 | 0.71013  |
| AT1G17520 | AT1G17520 | 143.8574 | 167.7191 | 144.2173 | 214.8685 | 208.0147 | 192.3903 | 217.8794 | 178.0168 | 194.273  | 165.4001 | 204.8714 | 162.6373 | 0.437188 | 0.012632 | 0.375652 | 0.046577 | 0.219939 | 0.487822 |
| AT1G17530 | TIM23-1   | 128.4016 | 146.3082 | 135.2037 | 249.5114 | 208.0147 | 238.2449 | 238.2449 | 164.5211 | 207.1469 | 248.9427 | 112.2657 | 113.0784 | 108.7702 | 0.75197  | 6.26E-05 | 0.586421 | -0.2822  | 0.424053 |
| AT1G17540 | AT1G17540 | 0        | 0        | 0        | 0        | 0        | 0        | 0.889303 | 0        | 0        | 0.995936 | 3.991002 | 0        | 0        | NA       | 0.145848 | NA       | 0.689542 | NA       |
| AT1G17545 | AT1G17545 | 0        | 0        | 0        | 0        | 0        | 0        | 0        | 0        | 0        | 0        | 0        | 0        | #N/A     | #N/A     | #N/A     | #N/A     | #N/A     | #N/A     |
| AT1G17550 | HAB2      | 491.0173 | 422.8663 | 431.3642 | 265.1832 | 251.7376 | 286.0933 | 369.0609 | 415.3726 | 297.755  | 393.4096 | 359.1902 | 421.614  | -0.73767 | 1.28E-06 | -0.31244 | 0.069557 | -0.19348 | 0.493509 |
| AT1G17560 | HLL       | 54.68958 | 57.09587 | 57.94445 | 61.44992 | 77.50867 | 34.25624 | 33.79353 | 35.60337 | 48.8123  | 50.85539 | 45.23135 | 71.47755 | 0.191532 | 0.551516 | -0.49202 | 0.121136 | -0.00819 | 0.992157 |
| AT1G17570 | AT1G17570 | 0        | 0        | 0        | 0        | 0        | 0        | 0        | 0        | 0        | 0        | 0        | 0        | #N/A     | #N/A     | #N/A     | #N/A     | #N/A     | #N/A     |
| AT1G17580 | XI-1      | 508.8509 | 400.0033 | 381.1457 | 250.3363 | 238.4882 | 299.0522 | 320.1493 | 332.2981 | 182.558  | 391.4905 | 353.8688 | 417.4703 | -0.72534 | 0.000794 | -0.64078 | 0.004339 | -0.17688 | 0.681579 |
| AT1G17590 | NYFA8     | 71.33424 | 74.93833 | 52.79383 | 105.5784 | 129.1811 | 76.75674 | 72.92289 | 80.91675 | 76.14719 | 71.96517 | 102.4357 | 68.36983 | 0.635322 | 0.016312 | 0.20228  | 0.54473  | 0.266848 | 0.595038 |
| AT1G17600 | AT1G17600 | 87.97888 | 80.29107 | 66.95803 | 138.1592 | 135.8058 | 164.4787 | 137.842  | 152.1235 | 94.69586 | 35.50282 | 41.24035 | 51.79533 | 0.861264 | 0.000241 | 0.681381 | 0.006473 | -0.82529 | 0.015829 |
| AT1G17610 | AT1G17610 | 77.27876 | 82.07532 | 70.82099 | 153.0062 | 172.2415 | 184.4155 | 171.6356 | 157.5179 | 189.3917 | 41.26003 | 45.23135 | 47.6517  | 1.116342 | 3.88E-04 | 1.1494   | 2.52E-09 | -0.74164 | 0.012784 |
| AT1G17615 | AT1G17615 | 0        | 0        | 0        | 4.536571 | 1.949607 | 1.993862 | 25.7898  | 28.05114 | 21.47741 | 0        | 0.391002 | 0        | 1.490486 | 0.013989 | 3.450463 | 4.26E-10 | 0.370305 | NA       |
| AT1G17620 | AT1G17620 | 167.6355 | 107.0548 | 139.0667 | 268.2699 | 164.9544 | 226.2829 | 166.6344 | 159.6757 | 225.5128 | 139.1327 | 137.0244 | 142.9551 | 0.501982 | 0.035718 | 0.307947 | 0.254713 | 0.006099 | 0.992882 |
| AT1G17630 | PCMP-E72  | 13.07794 | 17.84246 | 12.87654 | 16.49662 | 19.87402 | 13.95577 | 19.56468 | 16.18335 | 12.6912  | 22.06932 | 17.29434 | 22.78994 | 0.205053 | 0.677848 | 0.148997 | 0.792621 | 0.476985 | 0.513227 |
| AT1G17640 | AT1G17640 | 23.77808 | 33.90067 | 39.91728 | 23.9201  | 20.53649 | 34.88943 | 16.00746 | 28.05114 | 31.23987 | 30.70514 | 22.61568 | 32.1131  | -0.29112 | 0.482351 | -0.34052 | 0.440143 | -0.15551 | 0.852376 |
| AT1G17650 | GLYR2     | 332.8931 | 356.8492 | 356.6803 | 212.394  | 225.9013 | 204.3524 | 313.9242 | 353.8759 | 330.9474 | 443.3055 | 360.5205 | 385.3572 | -0.69038 | 3.81E-07 | -0.06597 | 0.276659 | 0.188027 | 0.439946 |
| AT1G17660 | AT1G17660 | 0        | 0        | 0        | 0        | 0        | 0        | 0        | 0        | 0        | 0        | 0        | 0        | #N/A     | #N/A     | #N/A     | #N/A     | #N/A     | #N/A     |
| AT1G17665 | AT1G17665 | 4.755616 | 8.92123  | 2.575309 | 42.06639 | 52.99738 | 60.80729 | 228.551  | 209.3046 | 279.2064 | 1.919071 | 11.97301 | 10.35907 | 2.713811 | 8.6E-13  | 4.864411 | 6.65E-41 | 0.322175 | 0.735155 |
| AT1G17670 | AT1G17670 | 0        | 0        | 0        | 0        | 0        | 0        | 0        | 0        | 0        | 0        | 0        | 0        | #N/A     | #N/A     | #N/A     | #N/A     | #N/A     | #N/A     |
| AT1G17680 | AT1G17680 | 246.1031 | 256.9314 | 230.4901 | 238.3762 | 213.9769 | 279.1154 | 296.1381 | 310.7203 | 213.7979 | 244.6816 | 204.8714 | 239.2944 | -0.00723 | 0.977474 | 0.15987  | 0.48507  | -0.08302 | 0.849079 |
| AT1G17690 | NOF1      | 190.2246 | 240.8732 | 187.9975 | 238.3762 | 183.5034 | 204.3524 | 214.3221 | 220.0935 | 186.463  | 206.3002 | 175.6041 | 213.3967 | 0.031688 | 0.89679  | 0.01327  | 0.960349 | -0.04142 | 0.928827 |
| AT1G17700 | PRA1F1    | 38.86504 | 23.1952  | 23.17778 | 11.13522 | 5.962205 | 7.94726  | 4.446517 | 10.7889  | 8.786214 | 20.15025 | 15.96401 | 20.71813 | -1.49055 | 0.000273 | -1.56889 | 0.000327 | -0.49523 | NA       |
| AT1G17710 | AT1G17710 | 1.188904 | 7.136984 | 1.287654 | 4.124156 | 5.962205 | 3.987363 | 5.335821 | 0        | 6.833722 | 4.797678 | 6.65167  | 6.215439 | 0.397225 | 0.582542 | 0.274406 | 0.735068 | 0.605849 | NA       |
| AT1G17720 | CP2AB2    | 532.629  | 463.904  | 544.6778 | 667.7008 | 614.7696 | 727.6938 | 683.7744 | 703.4362 | 516.3441 | 591.0739 | 603.9716 | 535.5637 | 0.372554 | 0.018744 | 0.296499 | 0.081556 | 0.160621 | 0.582115 |
| AT1G17730 | HPM1A     | 268.6923 | 314.0273 | 309.037  | 408.7038 | 396.1554 | 346.9006 | 377.6747 | 335.5348 | 440.2869 | 349.4271 | 421.7159 | 325.2747 | 0.369469 | 0.030833 | 0.367681 | 0.039664 | 0.195112 | 0.277049 |
| AT1G17744 | AT1G17744 | 0        | 0        | 0        | 0.412416 | 0        | 0        | 0.889303 | 0        | 0        | 0.995936 | 0        | 0.071813 | 0.04517  | NA       | 0.152348 | NA       | 0.507629 | NA       |
| AT1G17745 | PGDH2     | 186.6579 | 126.6815 | 135.2037 | 245.3873 | 272.9365 | 316.9954 | 401.9652 | 465.0016 | 632.0744 | 123.7801 | 111.7481 | 112.9138 | 0.853291 | 6.46E-05 | 1.67989  | 1.3E-16  | -0.35836 | 0.340479 |
| AT1G17750 | PEPR2     | 30.9115  | 24.97944 | 16.73951 | 22.27044 | 25.83622 | 27.91154 | 29.34701 | 35.60337 | 49.78855 | 34.54328 | 17.29434 | 22.78994 | 0.037433 | 0.941517 | 0.597261 | 0.138954 | 0.053177 | 0.960085 |
| AT1G17760 | CSTF77    | 185.469  | 157.0137 | 160.9568 | 146.4075 | 152.3675 | 162.485  | 160.0746 | 134.8612 | 116.1733 | 142.9708 | 182.2558 | 190.6068 | -0.13291 | 0.556808 | -0.28743 | 0.191615 | 0.025574 | 0.961209 |
| AT1G17770 | SUVH7     | 2.377808 | 0        | 0        | 0        | 0        | 0        | 0.107889 | 0        | 0        | 0        | 0        | 0        | -0.37984 | NA       | -0.18615 | NA       | -0.35339 | NA       |
| AT1G17780 | AT1G17780 | 177.1467 | 183.7773 | 159.6691 | 219.8175 | 238.4882 | 230.2702 | 251.6729 | 212.5413 | 205.0117 | 151.6066 | 164.9614 | 174.0323 | 0.398476 | 0.015386 | 0.362092 | 0.039336 | -0.08199 | 0.83156  |
| AT1G17790 | GTE5      | 117.7015 | 96.34929 | 117.1765 | 110.115  | 121.2315 | 97.6904  | 118.2774 | 108.9679 | 139.6032 | 132.4159 | 133.0334 | 122.237  | -0.01339 | 0.960674 | 0.134267 | 0.592055 | 0.209584 | 0.565939 |
| AT1G17800 | ENODL22   | 1.188904 | 0        | 0        | 0        | 0        | 0        | 0        | 0        | 0        | 0        | 0        | 0        | -0.2184  | NA       | -0.20558 | NA       | -0.19918 | NA       |
| AT1G1810  | TIP3-2    | 0        | 0        | 0        | 0.412416 | 0        | 0        | 0.889303 | 0        | 0        | 0.995936 | 0        | 0        | 0.066524 | NA       | 0.14834  | NA       | 0.160633 | NA       |
| AT1G1820  | AT1G1820  | 216.3805 | 203.404  | 182.8469 | 233.0148 | 194.7654 | 243.2291 | 273.0162 | 305.3259 | 171.8193 | 210.1383 | 198.2198 | 199.93   | 0.148696 | 0.557618 | 0.305315 | 0.208389 | 0.01348  | 0.983524 |
| AT1G1830  | AT1G1830  | 22.58917 | 23.1952  | 23.17778 | 42.4788  | 59.62205 | 42.86415 | 56.91542 | 38.84004 | 62.47974 | 33.58375 | 33.25835 | 37.29264 | 0.987671 | 0.001879 | 1.116152 | 0.000594 | 0.538156 | 0.322973 |
| AT1G1840  | ABCG11    | 545.7069 | 617.3491 | 527.9383 | 470.5662 | 451.1402 | 539.2909 | 503.9287 | 445.1627 | 482.6682 | 554.6116 | 669.158  | 591.5026 | -0.20861 | 0.170507 | -0.28613 | 0.062804 | 0.101957 | 0.721465 |
| AT1G1850  | STR8      | 148.613  | 194.4828 | 180.2716 | 138.984  | 107.3197 | 143.5451 | 181.4179 | 193.1213 | 107.3871 | 204.3811 | 180.9254 | 188.535  | -0.4062  | 0.096519 | -0.10991 | 0.721838 | 0.135668 | 0.781977 |
| AT1G1860  | AT1G1860  | 41.61164 | 57.09587 | 51.50617 | 91.14384 | 123.2189 | 105.6651 | 120.9453 | 90.62675 | 124.9955 | 61.66468 | 68.2468  | 52.8323  | 1.039066 | 0.000249 | 1.11264  | 0.000111 | -0.46918 | 0.369554 |
| AT1G1870  | EGY3      | 60.6341  | 60.66437 | 65.67037 | 55.05532 | 27.82363 | 28.90838 | 29.34701 | 30.20892 | 25.3824  | 62.36982 | 69.17737 | 65.26211 | -0.96088 | 0.000148 | -1.08091 | 6.93E-05 | 0.068789 | 0.912004 |
| AT1G1880  | BTf3      | 1436.196 | 1372.085 | 1522.007 | 1490.057 | 1776.075 | 1344.738 | 1324.173 | 1265.538 | 1769.934 | 1618.737 | 1810.585 | 1659.522 | 0.089193 | 0.654846 | 0.009711 | 0.968669 | 0.227962 | 0.405476 |
| AT1G1890  | GER2      | 153.0595 | 317.5958 | 300.9272 | 396.7438 | 425.9665 | 349.8911 | 303.2525 | 293.4581 | 409.0471 | 233.1672 | 282.0308 | 279.6948 | 0.280811 | 0.122587 | 0.060688 | 0.798866 | -0.27503 | 0.336162 |
| AT1G1900  | AT1G1900  | 0        | 0        | 0        | 0        | 0        | 0        | 1.778607 | 0        | 0        | 0        | 0        | 0        | 0        | NA       | 0.248756 | NA       | 0        | NA       |
| AT1G1910  | WAKL13    | 0        | 1.78424  |          |          |          |          |          |          |          |          |          |          |          |          |          |          |          |          |

|           |           |          |          |          |          |          |          |          |          |          |          |          |           |          |          |          |          |          |          |
|-----------|-----------|----------|----------|----------|----------|----------|----------|----------|----------|----------|----------|----------|-----------|----------|----------|----------|----------|----------|----------|
| AT1G18410 | AT1G18410 | 9.511232 | 8.92123  | 7.725926 | 11.96005 | 12.58688 | 10.96525 | 12.45025 | 9.710009 | 7.809968 | 9.595356 | 6.65167  | 10.35907  | 0.376954 | 0.491109 | 0.162125 | 0.808296 | 0.031561 | NA       |
| AT1G18415 | AT1G18415 | 21.40027 | 19.62671 | 11.58889 | 12.78488 | 17.22415 | 9.968408 | 14.22886 | 10.7889  | 13.66744 | 12.47396 | 13.30334 | 13.46678  | -0.32316 | 0.506625 | -0.37238 | 0.472761 | -0.36147 | NA       |
| AT1G18420 | ALMT3     | 3.566712 | 1.784246 | 0        | 0.412416 | 1.324935 | 1.939682 | 0.889303 | 1.07889  | 0.976246 | 2.878607 | 5.321336 | 4.143626  | -0.33302 | 0.665618 | -0.36127 | 0.6516   | 0.66729  | NA       |
| AT1G18430 | AT1G18430 | 0        | 0        | 0        | 0        | 0        | 0        | 0        | 0        | 0        | 0        | 0        | 0         | #N/A     | #N/A     | #N/A     | #N/A     | #N/A     | #N/A     |
| AT1G18440 | AT1G18440 | 120.0793 | 90.99655 | 104.3    | 117.5384 | 93.40789 | 87.72199 | 110.2736 | 96.0212  | 72.2422  | 111.3061 | 98.44471 | 165.745   | -0.0726  | 0.827713 | -0.17766 | 0.586709 | 0.238311 | 0.621889 |
| AT1G18450 | ARP4      | 469.6171 | 444.2773 | 459.6926 | 519.2312 | 476.9764 | 507.392  | 502.4565 | 457.4493 | 443.2157 | 429.872  | 389.7879 | 469.2657  | 0.128149 | 0.374129 | 0.029625 | 0.810747 | -0.08949 | 0.737834 |
| AT1G18460 | AT1G18460 | 681.242  | 594.1539 | 585.8827 | 611.3738 | 265.6494 | 289.0388 | 251.6729 | 253.5391 | 157.1756 | 671.6749 | 726.3623 | 592.5385  | -1.07873 | 5.04E-10 | -1.45684 | 1.55E-10 | 0.093089 | 0.815889 |
| AT1G18470 | AT1G18470 | 463.6725 | 531.7053 | 459.6926 | 643.3683 | 700.8904 | 768.8486 | 577.6866 | 686.174  | 713.6358 | 522.9469 | 525.4819 | 470.3016  | 0.474718 | 5.8E-05  | 0.567815 | 1.5E-06  | 0.062625 | 0.810508 |
| AT1G18480 | AT1G18480 | 131.9683 | 128.4657 | 139.0667 | 233.0148 | 240.4756 | 258.1818 | 218.7687 | 216.8569 | 278.2301 | 135.2945 | 123.7211 | 139.8474  | 0.849228 | 2.81E-07 | 0.81807  | 1.45E-06 | -0.00198 | 0.996883 |
| AT1G18485 | PCMP-H8   | 184.2801 | 165.9349 | 167.3951 | 100.6294 | 100.695  | 138.5609 | 209.8756 | 196.358  | 164.0093 | 143.9303 | 164.9614 | 180.2477  | -0.61335 | 0.00163  | 0.134778 | 0.581989 | -0.08385 | 0.852822 |
| AT1G18486 | AT1G18486 | 0        | 0        | 0        | 0        | 0        | 0        | 0        | 0        | 0        | 0        | 0        | 0         | #N/A     | #N/A     | #N/A     | #N/A     | #N/A     | #N/A     |
| AT1G18490 | PCO3      | 171.2022 | 180.2088 | 209.8877 | 206.6202 | 190.1281 | 168.4616 | 174.3035 | 181.2535 | 195.2492 | 186.1499 | 218.1748 | 160.5655  | 0.017682 | 0.943667 | -0.0281  | 0.912764 | 0.001938 | 0.996883 |
| AT1G18500 | IPMS1     | 680.0531 | 606.6437 | 592.321  | 403.7548 | 408.0798 | 504.4014 | 651.8595 | 688.3318 | 617.9637 | 572.8428 | 603.9716 | 558.3536  | -0.5164  | 9.02E-05 | 0.056898 | 0.754048 | -0.11618 | 0.657798 |
| AT1G18510 | TE16      | 0        | 0        | 0        | 0.412416 | 0        | 0        | 0        | 0        | 0        | 0        | 0        | 0         | 0.095918 | NA       | 0        | NA       | 0        | NA       |
| AT1G18520 | TE11      | 0        | 0        | 1.287654 | 0        | 0        | 0        | 0        | 0        | 0        | 0.959536 | 0        | 0         | -0.22221 | NA       | -0.2076  | NA       | -0.03666 | NA       |
| AT1G18530 | CML15     | 1.188904 | 0        | 1.287654 | 1.649662 | 1.987402 | 0.996841 | 0.889303 | 0        | 4.88123  | 0.959536 | 1.330334 | 0         | 0.28397  | 0.705468 | 0.402055 | 0.592055 | -0.08247 | NA       |
| AT1G18540 | RPL6A     | 2768.957 | 2662.095 | 3089.083 | 3180.136 | 4022.501 | 3010.459 | 2580.759 | 2466.342 | 3452.006 | 2985.115 | 3103.669 | 3067.319  | 0.256799 | 0.144726 | -0.00376 | 0.987444 | 0.101658 | 0.768141 |
| AT1G18550 | AT1G18550 | 59.4452  | 37.46917 | 61.80741 | 58.1506  | 52.33491 | 73.76622 | 56.02612 | 56.10228 | 43.93107 | 58.53167 | 57.20436 | 56.97486  | 0.165041 | 0.600335 | -0.04857 | 0.899429 | 0.091696 | 0.884754 |
| AT1G18560 | AT1G18560 | 58.25629 | 64.23286 | 54.08148 | 44.54088 | 41.73544 | 49.84204 | 55.13682 | 67.97007 | 45.88356 | 51.81492 | 70.5077  | 59.04667  | -0.36144 | 0.195728 | -0.05727 | 0.876899 | 0.033796 | 0.961988 |
| AT1G18570 | MYB51     | 127.2127 | 151.6609 | 139.0667 | 514.6946 | 594.8956 | 732.678  | 1035.149 | 1010.92  | 1047.512 | 84.43914 | 89.13238 | 110.842   | 2.094706 | 1.39E-36 | 2.835847 | 5.09E-67 | -0.52949 | 0.054981 |
| AT1G18580 | GAUT11    | 208.0582 | 235.5205 | 169.9704 | 157.1303 | 163.6294 | 194.384  | 182.3072 | 226.5669 | 149.3566 | 157.3638 | 160.9704 | 157.4578  | -0.2471  | 0.257126 | -0.12855 | 0.614039 | -0.35092 | 0.274581 |
| AT1G18590 | SOT17     | 502.9064 | 326.517  | 392.7346 | 364.1643 | 392.7346 | 302.0428 | 348.607  | 285.9058 | 387.3657 | 179.7678 | 344.5565 | 455.4879  | -0.33289 | 0.124126 | -0.25524 | 0.28017  | 0.062685 | 0.896393 |
| AT1G18600 | ATRB12    | 135.535  | 119.5445 | 112.0259 | 168.2656 | 152.3675 | 146.5356 | 158.296  | 153.2024 | 118.1258 | 142.0113 | 107.7571 | 117.0574  | 0.342074 | 0.100671 | 0.217806 | 0.362274 | 0.002627 | 0.996376 |
| AT1G18610 | AT1G18610 | 89.1678  | 55.31163 | 97.86173 | 55.26369 | 56.30972 | 60.80729 | 74.70149 | 66.89118 | 59.55101 | 104.5894 | 90.46271 | 83.90843  | -0.50306 | 0.042446 | -0.279   | 0.33106  | 0.176295 | 0.714381 |
| AT1G18620 | AT1G18620 | 1723.911 | 1894.869 | 1831.044 | 566.2466 | 639.2809 | 731.6811 | 660.7525 | 614.9673 | 483.2418 | 1644.644 | 1891.735 | 1561.111  | -1.472   | 8.43E-29 | -1.60431 | 8.04E-29 | -0.09505 | 0.76911  |
| AT1G18630 | RBG6      | 24.96698 | 23.1952  | 25.75309 | 58.1506  | 49.02258 | 60.80729 | 32.90423 | 36.68226 | 60.52725 | 27.82653 | 22.61568 | 49.72351  | 1.076558 | 0.001723 | 0.730459 | 0.055263 | 0.395844 | 0.546963 |
| AT1G18640 | PSP       | 243.7253 | 344.3595 | 341.2284 | 275.4936 | 330.5712 | 317.9922 | 319.2599 | 277.2747 | 287.0163 | 413.5599 | 361.8508 | 347.0287  | -0.00556 | 0.981347 | -0.06409 | 0.789899 | 0.274679 | 0.329153 |
| AT1G18650 | PDCB3     | 271.0701 | 274.7739 | 276.8457 | 137.7468 | 139.7806 | 128.5925 | 119.1667 | 130.5457 | 129.8407 | 271.5486 | 263.4061 | 286.9461  | -0.9986  | 2.73E-13 | -1.10041 | 1.88E-14 | 0.001096 | 0.997611 |
| AT1G18660 | AT1G18660 | 525.4955 | 479.9622 | 578.1568 | 527.4795 | 535.936  | 563.215  | 771.9514 | 648.4129 | 471.5268 | 587.2580 | 610.6233 | 649.5134  | 0.034732 | 0.880464 | 0.249952 | 0.216902 | 0.215547 | 0.494715 |
| AT1G18670 | IBS1      | 187.8468 | 181.9931 | 198.2988 | 107.6405 | 108.6446 | 130.5861 | 136.0634 | 142.4135 | 85.90965 | 182.3118 | 139.6851 | 154.3501  | -0.7016  | 0.000741 | -0.62377 | 0.004353 | -0.24309 | 0.52532  |
| AT1G18680 | AT1G18680 | 55.87849 | 65.64381 | 70.82099 | 88.66935 | 83.47088 | 58.81361 | 53.35821 | 56.10228 | 62.00466 | 72.92471 | 63.85603 | 53.86714  | 0.149025 | 0.651606 | -0.12664 | 0.713337 | -0.13027 | 0.836577 |
| AT1G18690 | GT4       | 73.71204 | 66.0171  | 61.80741 | 67.63615 | 74.19633 | 75.7599  | 72.92289 | 80.91675 | 68.33722 | 47.97678 | 73.16837 | 60.08258  | 0.096076 | 0.745408 | 0.130301 | 0.673926 | -0.16661 | 0.74185  |
| AT1G18700 | AT1G18700 | 338.8376 | 308.6746 | 330.9272 | 365.8126 | 331.8961 | 367.8342 | 439.3159 | 390.5582 | 328.0187 | 306.9191 | 357.8598 | 337.905   | 0.117849 | 0.511678 | 0.237404 | 0.169208 | 0.027512 | 0.946861 |
| AT1G18710 | AlMYB47   | 33.28931 | 55.31163 | 61.80741 | 48.66504 | 51.67245 | 64.79465 | 188.5323 | 165.0702 | 256.7527 | 66.20796 | 31.92802 | 53.93785  | 0.322996 | 0.340196 | 0.213922 | 2.96E-15 | 0.266212 | 0.654642 |
| AT1G18720 | AT1G18720 | 372.1269 | 410.3766 | 406.8988 | 764.6185 | 726.7266 | 661.9023 | 749.6828 | 667.8329 | 846.4053 | 481.6869 | 525.4819 | 365.675   | 0.844404 | 7.13E-08 | 0.913943 | 5.74E-09 | 0.201717 | 0.499192 |
| AT1G18730 | PNSB4     | 544.518  | 460.3355 | 582.0198 | 368.6995 | 374.9565 | 301.0459 | 626.959  | 536.2083 | 785.878  | 742.6806 | 800.8611 | 939.5672  | -0.58901 | 0.001122 | 0.287907 | 0.156113 | 0.629569 | 0.004491 |
| AT1G18735 | AT1G18735 | 0        | 0        | 0        | 0.662467 | 0        | 0        | 0        | 0        | 0        | 0        | 0        | 0         | 0.128567 | NA       | 0        | NA       | 0        | NA       |
| AT1G18740 | AT1G18740 | 467.2393 | 544.195  | 471.2815 | 653.6787 | 737.9885 | 1069.61  | 1118.744 | 1092.916 | 1606.901 | 409.7217 | 489.5629 | 456.8348  | 0.707339 | 0.000786 | 1.326167 | 3.62E-11 | -0.12432 | 0.786163 |
| AT1G18745 | AT1G18745 | 65.38972 | 66.0171  | 64.38272 | 120.4253 | 172.904  | 125.6019 | 132.5062 | 107.889  | 150.3419 | 66.20796 | 51.88302 | 72.51346  | 0.959402 | 0.000067 | 0.959402 | 0.000067 | -0.02887 | 0.967712 |
| AT1G18750 | AGL65     | 57.06739 | 83.85956 | 68.24568 | 59.80026 | 51.67245 | 69.77885 | 91.59826 | 60.41784 | 55.64602 | 71.00564 | 75.82904 | 78.7289   | -0.19168 | 0.535169 | 0.013097 | 0.972376 | 0.119265 | 0.844242 |
| AT1G18760 | AT1G18760 | 0        | 0        | 0        | 0.824831 | 0        | 0        | 0        | 0        | 0        | 0        | 0        | 0         | 0.173038 | NA       | 0        | NA       | 0        | NA       |
| AT1G18770 | AT1G18770 | 45.17835 | 69.5856  | 47.64321 | 43.30364 | 42.39791 | 47.84836 | 48.91169 | 35.60337 | 61.5035  | 68.12703 | 82.48071 | 59.04667  | -0.25238 | 0.434537 | -0.11687 | 0.760851 | 0.366529 | 0.448796 |
| AT1G18780 | AT1G18780 | 1.188904 | 0        | 0        | 0        | 0        | 0        | 0        | 0        | 0        | 0        | 1.330334 | 0         | -0.22006 | NA       | -0.20393 | NA       | 0.001199 | NA       |
| AT1G18790 | RKD1      | 0        | 0        | 0        | 0        | 0.662467 | 0        | 0        | 0        | 0.976246 | 0        | 0        | 0         | 0.099421 | NA       | 0.15305  | NA       | 0.164334 | NA       |
| AT1G18800 | NRP2      | 340.0265 | 347.928  | 337.3654 | 426.4377 | 480.2888 | 401.7268 | 304.1418 | 356.0337 | 447.1207 | 355.0282 | 405.7519 | 1396.7522 | 0.347643 | 0.043004 | 0.108499 | 0.614311 | 0.170728 | 0.58641  |
| AT1G18810 | PKS3      | 260.37   | 251.5787 | 233.0654 | 164.9662 | 176.2163 | 183.4187 | 112.0522 | 119.7568 | 96.64835 | 323.3635 | 446.9922 | 263.1203  | -0.49563 | 0.016263 | -1.1463  | 1.22E-08 | 0.455696 | 0.117619 |
| AT1G18820 | AT1G18820 | 0        | 0        | 0        | 0        | 0        | 0        | 0        | 0        | 0        | 0        | 0        | 0         | #N/A     | #N/A     | #N/A     | #N/A     | #N/A     | #N/A     |
| AT1G18830 | SEC31A    | 42.80054 | 53.52738 | 51.50617 | 978.2497 | 965.2148 | 1176.272 | 1045.821 | 965.6065 | 543.769  | 59.49121 | 59.86503 | 52.83123  | 4.198872 | 4.35E-70 | 3.920071 | 5.88E-61 | 0.195004 | 0.738346 |
| AT1G18835 | MF13      | 3.566712 | 0        | 3.862963 | 2.062708 | 2.649869 | 2.990522 | 0.889303 | 2.15778  | 1.952492 | 1.919071 | 2.660668 | 4.143626  | -0.03991 | 0.963026 | -0.35329 | 0.661858 | 0.077606 | NA       |
| AT1G18840 | IQD30     | 467.2393 | 454.9827 | 499.6099 | 291.9902 | 286.1859 | 355.8722 | 293.4701 | 263.2491 | 229.4179 | 513.3516 | 560.0706 | 485.8402  | -0.60592 | 3.13E-05 | -0.84158 | 8.95E-09 | 0.128554 | 0.655065 |
| AT1G18850 | AT1G18850 | 124.8349 | 101.702  | 118.4642 | 141.4585 | 145.7428 | 139.5577 | 71.14428 | 84.15342 | 47.4131  | 92.83681 | 98.44471 | 104.6266  | 0.290034 | 0.2937   | -0.18784 | 0.554125 | -0.2358  | 0.626348 |
| AT1G18860 | WRKY61    | 1.188904 | 3.568492 | 2.575309 | 19.79595 | 18.54908 | 15.94945 | 17.78607 | 14.9668  | 5.857476 | 1.9190   |          |           |          |          |          |          |          |          |



|           |           |          |          |          |          |          |          |          |          |          |          |          |           |          |          |          |          |          |          |
|-----------|-----------|----------|----------|----------|----------|----------|----------|----------|----------|----------|----------|----------|-----------|----------|----------|----------|----------|----------|----------|
| AT1G19360 | AT1G19360 | 418.4942 | 431.7875 | 418.4877 | 409.1163 | 440.5407 | 489.4488 | 408.1903 | 418.6093 | 397.3321 | 327.2016 | 345.8868 | 348.0646  | 0.071691 | 0.642608 | -0.05017 | 0.774442 | -0.30957 | 0.097698 |
| AT1G19370 | AT1G19370 | 194.9802 | 189.1301 | 162.2444 | 171.9773 | 156.3423 | 201.3618 | 241.8905 | 256.7758 | 179.6293 | 166.9592 | 154.3187 | 163.6732  | -0.04963 | 0.842361 | 0.305522 | 0.150286 | -0.16462 | 0.662652 |
| AT1G19371 | MIR169H   | 1.188904 | 0        | 1.287654 | 0        | 0        | 0        | 0        | 0        | 0        | 0.995936 | 0        | 0         | -0.47979 | NA       | -0.44744 | NA       | -0.23773 | 0        |
| AT1G19373 | AT1G19373 | 0        | 0        | 0        | 0.824831 | 0        | 0        | 0        | 0        | 0        | 0        | 0        | 0         | 0.173038 | NA       | 0        | NA       | 0        | NA       |
| AT1G19376 | AT1G19376 | 0        | 0        | 0        | 0        | 0.662467 | 0.996841 | 0        | 0        | 0        | 0.995936 | 1.330334 | 0         | 0.285723 | NA       | 0        | NA       | 0        | 0.388126 |
| AT1G19380 | AT1G19380 | 29.7226  | 57.09587 | 41.20494 | 151.7689 | 141.1055 | 239.2418 | 178.75   | 166.1491 | 359.2585 | 43.1791  | 33.25835 | 42.47217  | 1.902112 | 2.43E-09 | 2.286926 | 4.18E-13 | -0.05758 | 0.933388 |
| AT1G19390 | WAKL11    | 2.377808 | 0        | 0        | 0        | 0.662467 | 0        | 0.889303 | 0        | 0.889303 | 0        | 0        | 0.1035907 | -0.28767 | NA       | -0.22746 | NA       | -0.20325 | NA       |
| AT1G19392 | AT1G19392 | 0        | 0        | 0        | 4.948987 | 5.962205 | 0.996841 | 6.225124 | 5.39445  | 5.857476 | 0        | 0        | 0         | 1.488174 | 0.017143 | 1.794678 | 0.004012 | 0        | NA       |
| AT1G19394 | AT1G19394 | 36.85602 | 60.66437 | 25.75309 | 38.35465 | 39.74804 | 42.86415 | 50.6903  | 44.23449 | 28.31113 | 45.09817 | 75.82904 | 40.40035  | -0.00279 | 0.995811 | 0.029629 | 0.952843 | 0.371431 | 0.556796 |
| AT1G19396 | AT1G19396 | 29.7226  | 19.62671 | 38.2384  | 28.86909 | 29.81103 | 30.90206 | 34.68284 | 35.60337 | 21.47741 | 41.26003 | 23.94601 | 25.89766  | 0.160353 | 0.708277 | 0.196024 | 0.665432 | 0.203502 | 0.78583  |
| AT1G19397 | AT1G19397 | 45.17835 | 62.44861 | 64.38272 | 56.08852 | 73.53387 | 53.8294  | 69.36567 | 58.26006 | 63.45599 | 49.89585 | 42.57069 | 56.97486  | 0.102543 | 0.754741 | 0.15915  | 0.663754 | -0.17423 | 0.757259 |
| AT1G19400 | AT1G19400 | 1084.28  | 1143.702 | 1131.848 | 727.5011 | 804.8977 | 797.4726 | 826.1629 | 871.7431 | 846.4053 | 958.5761 | 1025.687 | 1023.476  | -0.52636 | 5.61E-08 | -0.39789 | 8.53E-05 | -0.15845 | 0.344719 |
| AT1G19410 | AT1G19410 | 0        | 0        | 0        | 1.237247 | 2.649869 | 0.996841 | 0.889303 | 2.15778  | 0        | 0        | 0        | 0         | 0.824123 | NA       | 0.497178 | NA       | 0        | NA       |
| AT1G19415 | AT1G19415 | 0        | 3.568492 | 0        | 0.412416 | 0.662467 | 0.996841 | 1.778607 | 0        | 0        | 0.995936 | 1.330334 | 1.035907  | -0.18238 | 0.803186 | -0.18357 | 0.809158 | 0.044433 | NA       |
| AT1G19420 | AT1G19420 | 5.94452  | 1.784246 | 5.150617 | 1.237247 | 3.312336 | 0.996841 | 0.889303 | 2.15778  | 2.928738 | 3.838143 | 10.64267 | 4.143626  | -0.7577  | 0.262865 | -0.67341 | 0.355579 | 0.31402  | NA       |
| AT1G19430 | AT1G19430 | 354.2934 | 292.6163 | 305.1741 | 217.343  | 223.2515 | 239.2418 | 227.6617 | 277.2747 | 209.8929 | 293.6179 | 343.2262 | 322.1669  | -0.48682 | 0.002084 | -0.41378 | 0.013751 | 0.003009 | 0.994833 |
| AT1G19440 | KCS4      | 307.9261 | 258.7157 | 300.0235 | 311.5606 | 329.8436 | 120.6177 | 140.51   | 179.7568 | 130.817  | 275.8667 | 263.4061 | 334.5978  | -1.16086 | 5.42E-14 | -1.12887 | 0.181152 | 0.008366 | 0.986396 |
| AT1G19450 | AT1G19450 | 1249.538 | 1381.368 | 1052.014 | 313.4356 | 316.6594 | 298.0554 | 222.3259 | 190.9635 | 157.1756 | 97.73863 | 870.0384 | 1114.635  | -1.9436  | 7.15E-39 | -2.62798 | 3.99E-65 | -0.29811 | 0.230043 |
| AT1G19460 | AT1G19460 | 0        | 0        | 1.784246 | 0        | 0        | 0        | 0        | 0        | 0        | 0.995936 | 0        | 0         | -0.26756 | NA       | -0.24986 | NA       | -0.06955 | NA       |
| AT1G19464 | MIR864A   | 0        | 0        | 0        | 0        | 0.412416 | 1.987402 | 0        | 0        | 0        | 0        | 0        | 0         | 0.412841 | NA       | 0        | NA       | 0.166173 | NA       |
| AT1G19470 | AT1G19470 | 0        | 1.784246 | 0        | 0        | 0        | 0        | 0.996841 | 1.778607 | 0        | 0        | 0        | 0         | -0.10411 | NA       | 0.005052 | NA       | -0.23903 | NA       |
| AT1G19480 | AT1G19480 | 68.95643 | 67.80135 | 57.94445 | 50.3147  | 58.95959 | 47.84836 | 49.80009 | 77.68008 | 44.90732 | 58.53167 | 63.85603 | 63.1903   | -0.29031 | 0.318764 | -0.17395 | 0.606482 | -0.05979 | 0.920759 |
| AT1G19485 | AT1G19485 | 303.1705 | 296.1848 | 332.2148 | 280.0302 | 270.9491 | 308.0238 | 309.4776 | 376.5326 | 251.8715 | 336.797  | 375.1542 | 320.0951  | -0.11966 | 0.555691 | 0.005964 | 0.980616 | 0.141108 | 0.675176 |
| AT1G19490 | AT1G19490 | 52.31177 | 24.97944 | 38.62963 | 31.756   | 32.4609  | 27.91154 | 24.01119 | 23.73558 | 9.76246  | 30.70514 | 27.93701 | 33.14901  | -0.32138 | 0.410523 | -0.94242 | 0.01205  | -0.33058 | 0.617041 |
| AT1G19500 | AT1G19500 | 0        | 0        | 0        | 0        | 0        | 0        | 0        | 0        | 0        | 0        | 0        | 0         | #N/A     | #N/A     | #N/A     | #N/A     | #N/A     | #N/A     |
| AT1G19510 | RLS       | 16.64466 | 14.27397 | 15.45185 | 8.660727 | 15.23675 | 18.93997 | 19.56468 | 18.34113 | 22.45366 | 13.4335  | 13.30334 | 18.64632  | -0.17152 | 0.745737 | 0.330819 | 0.520136 | -0.03038 | 0.981084 |
| AT1G19520 | NFD5      | 310.3039 | 240.8732 | 271.6951 | 207.0326 | 172.904  | 209.3366 | 199.204  | 224.4091 | 219.6553 | 225.4909 | 246.1118 | 254.833   | -0.48204 | 0.002644 | -0.48204 | 0.002644 | -0.18552 | 0.528935 |
| AT1G19530 | AT1G19530 | 5.94452  | 1.736894 | 31.41842 | 23.9201  | 19.21155 | 15.94945 | 22.23259 | 19.42002 | 18.54867 | 19.19071 | 14.63367 | 10.35907  | 0.738402 | 0.109816 | 0.736438 | 0.134378 | 0.348952 | 0.699043 |
| AT1G19540 | AT1G19540 | 77.27876 | 67.80135 | 91.42346 | 51.96436 | 52.33491 | 46.85152 | 66.69776 | 64.7334  | 56.62227 | 79.64146 | 82.48071 | 108.7702  | -0.62427 | 0.008744 | -0.32725 | 0.232877 | 0.182899 | 0.694014 |
| AT1G19550 | AT1G19550 | 146.2352 | 114.1917 | 162.2444 | 152.5938 | 175.5538 | 133.5767 | 184.0858 | 152.1235 | 197.2017 | 228.3665 | 219.5051 | 226.8635  | 0.116828 | 0.612712 | 0.316924 | 0.138442 | 0.647332 | 0.006028 |
| AT1G19560 | AT1G19560 | 0        | 0        | 2.975309 | 1.649662 | 0.662467 | 0        | 0        | 1.952492 | 6.716749 | 1.330334 | 2.071813 | 0         | -0.05806 | 0.940729 | -0.13163 | 0.871899 | 0.77663  | NA       |
| AT1G19570 | DHAR1     | 1424.307 | 1134.78  | 1469.214 | 1243.433 | 1476.64  | 1227.111 | 1552.724 | 1465.133 | 1852.915 | 2325.914 | 2423.868 | 1672.989  | -0.03018 | 0.902149 | 0.266718 | 0.189185 | 0.656975 | 0.002383 |
| AT1G19580 | GAMMAA21  | 160.502  | 198.0513 | 167.3951 | 214.0437 | 164.2919 | 205.3492 | 161.8532 | 167.2279 | 188.1555 | 181.3522 | 123.7211 | 196.8222  | 0.154397 | 0.521432 | -0.01611 | 0.9573   | -0.05001 | 0.92396  |
| AT1G19600 | AT1G19600 | 366.1824 | 301.5376 | 336.0778 | 281.2674 | 265.6494 | 256.1881 | 252.5622 | 298.8525 | 322.1612 | 356.9473 | 248.7725 | 417.4703  | -0.31518 | 0.128251 | -0.19988 | 0.392725 | 0.028642 | 0.957008 |
| AT1G19610 | PDF1.4    | 3.566712 | 3.568492 | 1.287654 | 44.12847 | 45.04777 | 30.90206 | 43.57587 | 40.99782 | 80.05217 | 0        | 0        | 0.207183  | 2.971129 | 1.18E-10 | 3.373179 | 1.88E-13 | -0.70265 | 0.493509 |
| AT1G19620 | AT1G19620 | 8.322328 | 5.352738 | 16.73951 | 8.248311 | 4.637271 | 11.96209 | 13.33955 | 8.63112  | 9.76246  | 14.39303 | 18.62468 | 5.179533  | -0.28872 | 0.644562 | 0.029318 | 0.96844  | 0.220143 | NA       |
| AT1G19630 | CYP72A1   | 16.64466 | 10.70548 | 10.30123 | 8.660727 | 17.2904  | 9.274542 | 8.971567 | 15.11816 | 10.7889  | 8.637722 | 15.32527 | 20.71813  | -0.42951 | 0.419793 | -0.1764  | 0.78226  | 0.324766 | NA       |
| AT1G19640 | JMT       | 28.53369 | 10.70548 | 24.46543 | 3.71174  | 3.312336 | 6.997788 | 6.225124 | 7.55223  | 5.857476 | 30.70514 | 54.54369 | 32.1131   | -1.90545 | 1.74E-05 | -1.44383 | 0.002049 | 0.76182  | 0.234017 |
| AT1G19650 | SFH4      | 279.3924 | 289.0479 | 231.7778 | 289.1033 | 275.5864 | 299.0575 | 422.4192 | 374.3748 | 288.9688 | 341.5947 | 345.8868 | 293.1615  | 0.109488 | 0.607936 | 0.435195 | 0.01848  | 0.289112 | 0.313786 |
| AT1G19660 | BD2       | 2086.526 | 2720.975 | 2351.257 | 2333.035 | 2148.381 | 2223.952 | 3216.611 | 3480.499 | 3076.151 | 2808.561 | 2779.068 | 2508.966  | -0.09143 | 0.541562 | 0.446163 | 0.000359 | 0.177399 | 0.405476 |
| AT1G19670 | CLH1      | 586.1296 | 727.9724 | 699.1963 | 1114.347 | 1051.336 | 1028.74  | 2353.986 | 2300.193 | 2653.437 | 903.8826 | 1046.973 | 726.1705  | 0.657846 | 1.47E-05 | 1.833138 | 6.73E-38 | 0.404461 | 0.063775 |
| AT1G19680 | AT1G19680 | 307.9261 | 330.0855 | 267.8321 | 259.4094 | 252.4    | 310.0175 | 312.1455 | 322.5881 | 262.6102 | 249.4793 | 292.6735 | 226.8635  | -0.14023 | 0.475838 | -0.00985 | 0.967968 | -0.23246 | 0.431085 |
| AT1G19690 | AT1G19690 | 67.76752 | 76.72258 | 69.53333 | 96.91766 | 85.45828 | 74.76306 | 64.91915 | 83.07453 | 65.40848 | 69.08657 | 53.21336 | 73.54936  | 0.278335 | 0.27871  | -0.00247 | 0.994235 | -0.10553 | 0.850918 |
| AT1G19700 | BLH10     | 428.0054 | 376.4759 | 390.1593 | 303.5379 | 345.1454 | 364.8437 | 395.74   | 336.6137 | 245.0377 | 399.1668 | 478.9202 | 390.5368  | -0.27336 | 0.248656 | -0.28365 | 0.181327 | 0.080624 | 0.850918 |
| AT1G19710 | AT1G19710 | 153.3686 | 157.0137 | 173.8333 | 162.9042 | 156.3423 | 186.4092 | 145.8458 | 167.2279 | 117.1495 | 129.5373 | 118.3997 | 162.6373  | 0.054897 | 0.830205 | -0.16907 | 0.409497 | -0.22775 | 0.532469 |
| AT1G19715 | JAL3      | 847.6885 | 836.8114 | 871.7482 | 483.7635 | 389.5308 | 528.3256 | 473.9988 | 538.3661 | 324.1137 | 831.9174 | 889.9934 | 809.043   | -0.84925 | 1.82E-06 | -0.91511 | 3.23E-07 | -0.01455 | 0.978296 |
| AT1G19720 | DYW7      | 1148.481 | 1111.585 | 1021.11  | 353.4401 | 313.347  | 478.4836 | 483.7811 | 620.3617 | 306.5412 | 1028.622 | 971.1438 | 1049.373  | -1.4701  | 5.14E-12 | -1.17686 | 6.04E-08 | -0.10187 | 0.843763 |
| AT1G19730 | TRX4      | 130.7794 | 148.0924 | 159.6621 | 274.2564 | 265.6494 | 198.3713 | 183.1965 | 169.3857 | 227.4653 | 168.8783 | 151.6581 | 155.386   | 0.744166 | 9.07E-05 | 0.395242 | 0.066769 | 0.118364 | 0.783534 |
| AT1G19740 | AT1G19740 | 1257.86  | 1395.28  | 1212.97  | 862.361  | 996.3508 | 862.2673 | 1222.792 | 1117.73  | 1644.975 | 1259.87  | 1595.07  | 1191.293  | -0.49549 | 0.005238 | 0.044058 | 0.859018 | 0.064123 | 0.876773 |
| AT1G19750 | AT1G19750 | 24.96698 | 8.92123  | 12.87654 | 15.25938 | 11.26194 | 9.968408 | 20.45398 | 9.710009 | 21.47741 | 11.51443 | 11.97301 | 6.215439  | -0.3099  | 0.568832 | 0.101008 | 0.875974 | -0.5791  | NA       |
| AT1G19770 | PUP14     | 655.0861 | 576.3115 | 547.2531 | 461.493  | 546.5355 | 729.6874 | 1146.312 | 1020.63  | 1140.255 | 405.036  | 576.0346 | 442.3321  | -0.03886 | 0.881642 | 0.872774 | 3.04E-06 | -0.31927 | 0.311768 |
| AT1G19780 | CNGC8     | 0        | 0        | 1.287654 | 3.71174  | 2.649869 | 3.       |          |          |          |          |          |           |          |          |          |          |          |          |

|           |           |          |          |          |          |          |          |          |          |          |          |          |          |          |          |           |          |          |          |
|-----------|-----------|----------|----------|----------|----------|----------|----------|----------|----------|----------|----------|----------|----------|----------|----------|-----------|----------|----------|----------|
| AT1G20260 | VHA-83    | 1789.3   | 1844.91  | 1934.057 | 1603.059 | 1566.735 | 1861.102 | 1886.213 | 1861.085 | 1626.426 | 1880.69  | 1761.362 | 1930.93  | -0.14683 | 0.257714 | -0.0508   | 0.747529 | 0.001761 | 0.99607  |
| AT1G20270 | PAH3      | 92.73451 | 92.78079 | 114.6012 | 120.0129 | 130.5061 | 107.6588 | 99.60199 | 120.8357 | 123.9832 | 86.35821 | 99.77505 | 96.33931 | 0.250713 | 0.256448 | 0.185938  | 0.457061 | -0.09377 | 0.846225 |
| AT1G20280 | AT1G20280 | 0        | 1.784246 | 0        | 0        | 0        | 0        | 0        | 0        | 0        | 0        | 0        | 0        | -0.2184  | NA       | -0.20558  | NA       | -0.19198 | NA       |
| AT1G20290 | AT1G20290 | 0        | 1.784246 | 0        | 0.412416 | 1.324935 | 0        | 0.889303 | 0        | 0.976246 | 0.959536 | 5.321336 | 5.179533 | -0.03557 | 0.965336 | 0.027042  | 0.973986 | 1.120685 | NA       |
| AT1G20300 | AT1G20300 | 112.9459 | 82.07532 | 84.98519 | 82.89953 | 79.49607 | 77.75358 | 77.36694 | 94.94231 | 116.4733 | 69.08657 | 113.0784 | 80.80071 | -0.21933 | 0.442256 | 0.02997   | 0.933387 | -0.11004 | 0.849275 |
| AT1G20310 | AT1G20310 | 0        | 1.784246 | 0        | 13.1975  | 16.56168 | 19.93682 | 42.66857 | 29.13003 | 64.43224 | 0        | 3.991002 | 10.35907 | 2.524571 | 1.78E-06 | 3.86982   | 2.955314 | 0.228957 | 0.869575 |
| AT1G20320 | AT1G20320 | 0        | 0        | 0        | 0.412416 | 0        | 0        | 0        | 2.15778  | 0        | 0.959536 | 0        | 0        | 0.05154  | NA       | 0.312676  | NA       | 0.151534 | NA       |
| AT1G20330 | SMTZ      | 961.8233 | 811.8319 | 788.0445 | 483.7635 | 437.8909 | 514.3698 | 294.3595 | 429.3982 | 641.3936 | 686.068  | 606.6323 | 655.7288 | -0.80763 | 0.000298 | -0.871797 | 9.59E-05 | -0.38136 | 0.29548  |
| AT1G20340 | DRT112    | 8787.189 | 9335.175 | 9375.411 | 5507.81  | 5242.766 | 3652.425 | 5785.808 | 5070.783 | 12323.15 | 10538.58 | 15518.35 | 14402.21 | -0.84726 | 0.020388 | -0.22428  | 0.62465  | 0.508195 | 0.398983 |
| AT1G20350 | TIM17-1   | 21.40027 | 42.8219  | 38.62963 | 139.3965 | 133.1559 | 118.6241 | 67.58706 | 78.75897 | 128.8645 | 18.23118 | 31.92802 | 20.71813 | 1.832142 | 6.44E-10 | 1.341641  | 1.69E-05 | -0.48383 | 0.417424 |
| AT1G20360 | AT1G20360 | 0        | 0        | 0        | 0        | 0        | 0        | 0        | 0        | 0        | 0        | 0        | 0        | #N/A     | #N/A     | #N/A      | #N/A     | #N/A     | #N/A     |
| AT1G20370 | AT1G20370 | 190.2246 | 144.5239 | 182.8469 | 123.7247 | 145.0803 | 134.5735 | 153.8495 | 148.8868 | 107.3871 | 170.7973 | 186.2468 | 169.8887 | -0.3649  | 0.069588 | -0.3369   | 0.119688 | 0.01311  | 0.982469 |
| AT1G20375 | MIR394A   | 0        | 0        | 0        | 0.412416 | 0        | 0        | 0        | 0        | 0        | 0        | 0        | 0        | 0.095918 | NA       | 0         | NA       | 0        | NA       |
| AT1G20380 | AT1G20380 | 76.08985 | 74.93833 | 81.12222 | 93.61834 | 76.18374 | 102.6746 | 67.58706 | 84.15342 | 55.64602 | 67.16749 | 69.17737 | 70.44164 | 0.216811 | 0.409415 | -0.16351  | 0.588171 | -0.16313 | 0.74269  |
| AT1G20390 | AT1G20390 | 43.98945 | 26.76369 | 34.76667 | 34.62471 | 27.16116 | 35.88627 | 63.14055 | 111.1257 | 59.55101 | 54.69353 | 47.89202 | 45.57989 | -0.13455 | 0.744103 | 1.045904  | 0.000953 | 0.432728 | 0.441256 |
| AT1G20400 | AT1G20400 | 2.377808 | 10.70548 | 2.575309 | 1.649662 | 1.324935 | 1.993682 | 2.66791  | 1.07889  | 4.88123  | 0.959536 | 3.991002 | 4.143626 | -0.90615 | 0.174844 | -0.44381  | 0.565966 | -0.4284  | NA       |
| AT1G20405 | AT1G20405 | 0        | 0        | 0        | 0        | 0        | 0        | 0        | 1.07889  | 0        | 0        | 1.330334 | 0        | 0        | NA       | 0.160793  | NA       | 0.184979 | NA       |
| AT1G20410 | AT1G20410 | 105.8125 | 132.0342 | 123.6148 | 155.4807 | 140.4431 | 125.6019 | 158.296  | 133.7824 | 101.5296 | 143.9303 | 196.8894 | 127.4165 | 0.226975 | 0.385856 | 0.126094  | 0.677498 | 0.358363 | 0.345352 |
| AT1G20420 | AT1G20420 | 0        | 0        | 0        | 1.287654 | 0        | 0        | 0        | 1.07889  | 0        | 0.959536 | 0        | 1.035907 | -0.3035  | NA       | -0.05056  | NA       | 0.131591 | NA       |
| AT1G20430 | AT1G20430 | 160.502  | 117.7602 | 178.984  | 290.3406 | 377.6063 | 224.2892 | 222.3259 | 171.5435 | 422.7145 | 158.3234 | 139.6851 | 224.7917 | 0.896218 | 0.004288 | 0.774709  | 0.018246 | 0.175609 | 0.794965 |
| AT1G20440 | COR47     | 1710.833 | 2094.705 | 1979.139 | 1803.081 | 1715.79  | 2030.565 | 2022.276 | 2348.743 | 327.0046 | 1740.598 | 1936.966 | 1686.456 | -0.05656 | 0.813048 | -0.045703 | 0.037066 | -0.10431 | 0.789623 |
| AT1G20450 | ERD10     | 1293.527 | 1495.198 | 1509.391 | 1167.961 | 1200.391 | 1255.023 | 1128.526 | 1167.359 | 1720.145 | 1310.726 | 1407.493 | 1224.442 | -0.24153 | 0.191302 | -0.095309 | 0.665473 | -0.12192 | 0.728249 |
| AT1G20460 | AT1G20460 | 60.6341  | 60.66437 | 56.65679 | 75.47205 | 78.17114 | 93.70303 | 65.80846 | 67.97007 | 85.90965 | 72.92471 | 73.16837 | 65.26211 | 0.444679 | 0.066449 | 0.292204  | 0.293847 | 0.23717  | 0.600359 |
| AT1G20470 | AT1G20470 | 17.83356 | 8.92123  | 20.60247 | 82.84311 | 17.22415 | 11.96209 | 8.903037 | 7.55223  | 9.76246  | 13.4335  | 18.62468 | 31.0772  | -0.33582 | 0.531072 | -0.72417  | 0.174577 | 0.333195 | NA       |
| AT1G20480 | 4CLL2     | 13.07794 | 23.1952  | 19.31482 | 12.37247 | 5.299738 | 11.96209 | 8.003731 | 14.02557 | 8.786214 | 25.90746 | 22.61568 | 18.64632 | -0.75299 | 0.100247 | -0.7112   | 0.154418 | 0.2739   | NA       |
| AT1G20490 | AT1G20490 | 51.12287 | 53.52738 | 52.79833 | 51.55195 | 49.02258 | 51.83572 | 51.5796  | 62.57562 | 69.31347 | 37.42189 | 49.22326 | 26.93357 | -0.04221 | 0.906538 | 0.211006  | 0.52432  | -0.46164 | 0.312722 |
| AT1G20500 | 4CLL4     | 0        | 0        | 0        | 0.412416 | 0        | 0        | 0        | 1.07889  | 0        | 0        | 1.330334 | 0        | 0.064033 | NA       | 0.167695  | NA       | 0.19372  | NA       |
| AT1G20510 | 4CLL5     | 476.7505 | 438.9245 | 440.3778 | 748.5343 | 769.1245 | 844.3241 | 1057.382 | 1037.892 | 966.4835 | 378.057  | 510.8482 | 417.4703 | 0.786491 | 2.33E-09 | 1.15876   | 2.56E-19 | -0.0606  | 0.854872 |
| AT1G20515 | AT1G20515 | 1.188904 | 0        | 2.575309 | 2.062078 | 7.949607 | 0.996841 | 2.66791  | 5.39445  | 5.857476 | 1.919071 | 1.330334 | 4.143626 | 0.672211 | 0.336081 | 0.854478  | 0.228327 | 0.342063 | NA       |
| AT1G20520 | AT1G20520 | 0        | 0        | 0        | 0        | 0        | 0        | 0        | 0        | 0        | 0        | 0        | 0        | #N/A     | #N/A     | #N/A      | #N/A     | #N/A     | #N/A     |
| AT1G20530 | AT1G20530 | 16.64466 | 10.70548 | 11.58889 | 8.248311 | 8.612075 | 11.96209 | 18.67537 | 12.94668 | 15.61994 | 7.676285 | 13.30334 | 13.46678 | -0.42718 | 0.402078 | 0.23441   | 0.68353  | -0.1834  | NA       |
| AT1G20540 | AT1G20540 | 256.8033 | 210.541  | 271.6951 | 256.9349 | 200.7276 | 236.2513 | 233.8868 | 217.9358 | 196.2254 | 246.6007 | 172.9434 | 285.9102 | -0.09175 | 0.720099 | -0.18911  | 0.448489 | -0.06423 | 0.894885 |
| AT1G20550 | AT1G20550 | 55.87849 | 37.46917 | 64.38272 | 31.756   | 33.12336 | 31.8989  | 27.56841 | 46.39227 | 45.88356 | 47.01725 | 46.56169 | 66.29802 | -0.68169 | 0.026558 | -0.39889  | 0.254086 | 0.004494 | 0.99607  |
| AT1G20560 | AE1       | 256.8033 | 253.3629 | 261.3938 | 189.2987 | 142.4305 | 156.504  | 184.0858 | 213.6202 | 143.5082 | 206.3002 | 163.6131 | 268.2998 | -0.6346  | 0.003188 | -0.4975   | 0.030395 | -0.26063 | 0.499012 |
| AT1G20570 | AT1G20570 | 35.66712 | 30.33218 | 25.75309 | 26.80701 | 20.53649 | 28.90838 | 18.67537 | 31.28781 | 19.52492 | 26.867   | 34.58868 | 25.89766 | -0.25478 | 0.520855 | -0.38242  | 0.356292 | -0.07919 | 0.927509 |
| AT1G20575 | AT1G20575 | 137.9129 | 178.4246 | 153.2309 | 312.1986 | 296.1229 | 247.2165 | 226.7724 | 226.5669 | 222.5841 | 157.3638 | 207.5321 | 187.4991 | 0.86616  | 2.72E-07 | 0.52429   | 0.00462  | 0.232426 | 0.471588 |
| AT1G20580 | SMD3B     | 146.2352 | 114.1917 | 122.3272 | 263.946  | 198.0777 | 209.3366 | 199.6206 | 116.5201 | 288.0876 | 225.6992 | 142.3457 | 178.1759 | 0.762394 | 0.010008 | 0.643556  | 0.161052 | 0.202991 | 0.739252 |
| AT1G20590 | CYCB2-8   | 14.26685 | 12.48972 | 16.73951 | 13.60971 | 20.53649 | 17.94313 | 15.11816 | 18.34113 | 12.6912  | 12.47396 | 14.63367 | 11.39497 | 0.202105 | 0.6894   | 0.058469  | 0.922957 | -0.17251 | NA       |
| AT1G20600 | AT1G20600 | 9.511232 | 5.352738 | 12.87654 | 23.9201  | 20.53649 | 8.971567 | 12.45025 | 8.63112  | 27.33489 | 6.716749 | 11.97301 | 4.143626 | 0.76387  | 0.195622 | 0.609149  | 0.307736 | -0.26329 | NA       |
| AT1G20610 | CYCB2-3   | 59.4452  | 57.09587 | 66.95803 | 78.71137 | 61.60946 | 93.70303 | 87.15174 | 90.62675 | 46.6978  | 82.52006 | 93.12338 | 66.29802 | 0.319845 | 0.282473 | 0.318217  | 0.318722 | 0.368458 | 0.433352 |
| AT1G20620 | CAT3      | 26701.59 | 25373.76 | 22143.79 | 30749.71 | 27013.43 | 31798.22 | 28416.8  | 42.7447  | 2671.46  | 19450.75 | 20328.83 | 20664.26 | 0.268363 | 0.03646  | 0.230669  | 0.088594 | -0.29323 | 0.066355 |
| AT1G20630 | CAT1      | 800.1324 | 817.1847 | 697.9087 | 649.5545 | 642.5933 | 672.8675 | 748.7935 | 776.8008 | 602.3438 | 628.4958 | 642.5513 | 640.1902 | -0.23326 | 0.095988 | -0.11912  | 0.464057 | -0.27221 | 0.179029 |
| AT1G20640 | NLP4      | 435.1388 | 363.9862 | 355.3926 | 234.6645 | 258.3622 | 242.2323 | 258.7873 | 290.2214 | 224.5366 | 307.0514 | 343.2262 | 378.6166 | -0.64564 | 1.24E-05 | -0.57363  | 0.000193 | -0.22793 | 0.374061 |
| AT1G20650 | AT1G20650 | 691.9421 | 706.5614 | 706.9222 | 324.9835 | 312.0221 | 385.7774 | 363.7251 | 336.6137 | 218.6791 | 705.2587 | 874.0294 | 636.5598 | -0.10983 | 1.96E-08 | -1.16572  | 1.69E-10 | 0.097381 | 0.814993 |
| AT1G20657 | AT1G20657 | 2.377808 | 0        | 1.287654 | 1.237427 | 2.649869 | 0.996841 | 0.889303 | 1.07889  | 0        | 0        | 0        | 0        | 0.201933 | 0.788076 | -0.30047  | 0.682054 | -0.67013 | NA       |
| AT1G20670 | AT1G20670 | 233.0252 | 194.4828 | 167.3951 | 163.729  | 181.516  | 170.4598 | 153.8495 | 161.8335 | 137.6507 | 194.7857 | 239.4601 | 166.781  | -0.20538 | 0.336672 | -0.38593  | 0.066325 | 0.005443 | 0.992275 |
| AT1G20680 | AT1G20680 | 0        | 0        | 1.287654 | 0.412416 | 0        | 0        | 1.07889  | 1.952492 | 0        | 0        | 0        | 1.035907 | -0.19638 | NA       | 0.268178  | NA       | -0.04977 | NA       |
| AT1G20690 | AT1G20690 | 1.188904 | 0        | 0        | 1.649662 | 3.312336 | 0.996841 | 2.66791  | 0        | 1.952492 | 0        | 0        | 1.035907 | 0.674013 | 0.301547 | 0.480002  | 0.496034 | -0.07454 | NA       |
| AT1G20691 | AT1G20691 | 0        | 0        | 0        | 0        | 0        | 0        | 0.889303 | 0        | 0        | 0        | 1.330334 | 0        | 0        | NA       | 0.141773  | NA       | 0.183636 | NA       |
| AT1G20693 | HMG82     | 1262.616 | 1463.082 | 1455.049 | 2593.682 | 3012.901 | 2504.064 | 2558.526 | 2048.812 | 4073.875 | 1308.807 | 1403.502 | 1419.192 | 0.927352 | 7.54E-06 | 1.022485  | 7.28E-07 | -0.01639 | 0.979097 |
| AT1G20696 | HMG83     | 634.8747 | 744.0306 | 722.3741 | 1476.448 | 1562.098 | 1193.218 | 1423.775 | 1321.64  | 2682.724 | 689.9061 | 671.8187 | 925.0645 | 0.969118 | 6.07E-05 | 1.313425  | 2.84E-08 | -0.17628 | 0.836071 |
| AT1G20700 | WOK14     | 1.188904 | 0        | 0        | 2.062078 | 1.324935 | 0        | 0.889303 | 1.07889  | 0        | 0        | 0        | 2.071813 | 0.356184 | NA       | 0.085563  | NA       | 0.113798 | NA       |
| AT1G20710 | WOK10     | 0        | 0        | 0        |          |          |          |          |          |          |          |          |          |          |          |           |          |          |          |

|           |           |          |          |          |          |          |          |          |          |          |          |          |          |          |          |          |          |          |          |
|-----------|-----------|----------|----------|----------|----------|----------|----------|----------|----------|----------|----------|----------|----------|----------|----------|----------|----------|----------|----------|
| AT1G21170 | SECSB     | 329.3264 | 256.9314 | 284.5716 | 315.9103 | 359.7197 | 370.8248 | 387.7363 | 375.4537 | 250.8952 | 356.9473 | 312.6285 | 292.1256 | 0.250861 | 0.236576 | 0.209555 | 0.363438 | 0.135818 | 0.733467 |
| AT1G21190 | LSM3A     | 112.9459 | 139.1712 | 158.3815 | 274.6688 | 274.9239 | 183.4187 | 200.9826 | 146.729  | 339.7336 | 152.5662 | 166.2917 | 136.7397 | 0.797365 | 0.004845 | 0.705402 | 0.017107 | 0.140769 | 0.826501 |
| AT1G21200 | AT1G21200 | 134.3461 | 128.4657 | 148.0802 | 133.2102 | 155.6798 | 138.5609 | 135.1741 | 122.9935 | 146.4369 | 114.1847 | 121.0604 | 119.1293 | 0.049801 | 0.082981 | -0.02419 | 0.926534 | -0.21484 | 0.519948 |
| AT1G21202 | MIR781A   | 0        | 0        | 0        | 0        | 0.662467 | 0        | 0.889303 | 0        | 0        | 0.959536 | 0        | 0        | 0.100335 | NA       | 0.144523 | NA       | 0.157063 | NA       |
| AT1G21210 | WAK4      | 13.07794 | 12.48972 | 10.30123 | 40.00431 | 42.39791 | 30.90206 | 17.78607 | 30.20892 | 17.57243 | 12.47396 | 18.62468 | 8.287252 | 1.493001 | 0.000119 | 0.733368 | 0.108879 | 0.074678 | 0.949258 |
| AT1G21220 | AT1G21220 | 15.45765 | 16.05821 | 15.45185 | 8.660727 | 10.59948 | 1.993682 | 7.114428 | 7.55223  | 7.809968 | 18.23118 | 19.95501 | 7.251346 | -0.86839 | 0.087652 | -0.85329 | 0.119176 | -0.04185 | NA       |
| AT1G21230 | WAK5      | 1.188904 | 0        | 1.287654 | 0.248381 | 1.324935 | 0        | 2.15778  | 0        | 0.959536 | 0        | 1.035907 | 0        | -0.04825 | NA       | -0.08984 | NA       | -0.08035 | NA       |
| AT1G21240 | WAK3      | 98.67903 | 108.839  | 83.69753 | 707.7051 | 669.0919 | 602.0918 | 581.6045 | 633.3084 | 548.6502 | 39.34096 | 46.56169 | 43.50807 | 2.559396 | 3.86E-68 | 2.728335 | 4.34E-59 | -1.11175 | 2.86E-06 |
| AT1G21245 | AT1G21245 | 10.70014 | 3.568492 | 12.87654 | 78.35896 | 84.79581 | 73.76622 | 59.58333 | 55.02339 | 80.05217 | 2.878607 | 6.65167  | 7.251346 | 2.757888 | 1.23E-15 | 2.475735 | 2.23E-12 | -0.6066  | 0.443472 |
| AT1G21250 | WAK1      | 1458.785 | 1500.551 | 1310.832 | 3722.875 | 3441.517 | 4005.306 | 2499.832 | 2820.218 | 2296.131 | 799.2932 | 872.6991 | 850.4793 | 1.374296 | 5.07E-34 | 0.827044 | 1.14E-12 | -0.75117 | 1.43E-08 |
| AT1G21260 | AT1G21260 | 51.12287 | 60.66437 | 34.76667 | 70.11065 | 74.8588  | 33.89259 | 59.58333 | 43.1556  | 55.64602 | 44.13864 | 45.23135 | 50.75942 | 0.306126 | 0.396724 | 0.120936 | 0.783215 | -0.04654 | 0.958266 |
| AT1G21270 | WAK2      | 1148.481 | 1309.637 | 1175.628 | 1924.331 | 1886.044 | 2129.252 | 1319.726 | 1451.107 | 1028.963 | 628.4958 | 615.9446 | 776.9299 | 0.698429 | 4.21E-06 | 0.064315 | 0.764258 | -0.82948 | 1.8E-06  |
| AT1G21280 | AT1G21280 | 51.12287 | 62.44861 | 46.35556 | 68.04857 | 60.94699 | 57.81677 | 57.80473 | 40.99782 | 78.09968 | 45.09817 | 58.53469 | 33.14901 | 0.232211 | 0.493443 | 0.153345 | 0.689993 | -0.21342 | 0.72897  |
| AT1G21281 | AT1G21281 | 0        | 0        | 0        | 0        | 0        | 0        | 0        | 0        | 0        | 0        | 0        | 0        | #N/A     | #N/A     | #N/A     | #N/A     | #N/A     | #N/A     |
| AT1G21286 | AT1G21286 | 0        | 0        | 0        | 0.412416 | 0.662467 | 0        | 0        | 0        | 0        | 0        | 0        | 0        | 0.196313 | NA       | 0        | NA       | 0        | NA       |
| AT1G21290 | AT1G21290 | 0        | 0        | 0        | 0        | 0        | 0        | 0        | 0        | 0        | 0.959536 | 0        | 0        | 0        | NA       | 0        | NA       | 0.171512 | NA       |
| AT1G21300 | AT1G21300 | 0        | 0        | 0        | 0        | 0        | 0        | 0        | 0        | 0        | 0        | 0        | 0        | #N/A     | #N/A     | #N/A     | #N/A     | #N/A     | #N/A     |
| AT1G21310 | EXT3      | 101.0568 | 89.2123  | 83.69753 | 696.5699 | 664.4547 | 554.2435 | 629.6269 | 568.575  | 648.2273 | 66.20796 | 111.7481 | 70.44164 | 2.73092  | 5.36E-51 | 2.675836 | 1.42E-48 | -0.16448 | 0.711805 |
| AT1G21320 | AT1G21320 | 1.188904 | 0        | 1.287654 | 1.649662 | 3.312336 | 1.993682 | 0.889303 | 2.15778  | 0.976246 | 1.919071 | 1.330334 | 2.071813 | 0.572779 | 0.42161  | 0.157359 | 0.854807 | 0.357944 | NA       |
| AT1G21323 | AT1G21323 | 0        | 0        | 0        | 0        | 0        | 0        | 0        | 0        | 0        | 0        | 0        | 0        | #N/A     | #N/A     | #N/A     | #N/A     | #N/A     | #N/A     |
| AT1G21326 | AT1G21326 | 1.188904 | 1.784246 | 1.287654 | 1.649662 | 1.324935 | 0.996841 | 4.446517 | 3.23667  | 2.928738 | 0.959536 | 1.330334 | 0        | -0.03628 | 0.96655  | 0.740966 | 0.305482 | -0.31401 | NA       |
| AT1G21327 | AT1G21327 | 0        | 0        | 0        | 0        | 0        | 0        | 0        | 0        | 0        | 0        | 0        | 0        | 0        | NA       | 0        | NA       | 0.172362 | NA       |
| AT1G21330 | AT1G21330 | 0        | 0        | 0        | 0        | 0        | 0        | 0        | 0        | 0        | 0        | 0        | 0        | #N/A     | #N/A     | #N/A     | #N/A     | #N/A     | #N/A     |
| AT1G21340 | DOF1.2    | 1.188904 | 0        | 0        | 0.412416 | 0        | 0        | 1.07889  | 0        | 0        | 0        | 0        | 0        | -0.13172 | NA       | -0.02794 | NA       | -0.21059 | NA       |
| AT1G21350 | AT1G21350 | 404.2273 | 392.5341 | 436.5148 | 333.6442 | 377.6063 | 308.0238 | 391.2935 | 334.4559 | 417.8333 | 490.3227 | 625.257  | 527.2764 | -0.26981 | 0.10392  | -0.10745 | 0.589672 | 0.402772 | 0.06     |
| AT1G21360 | GLTP2     | 1.188904 | 0        | 0        | 2.062078 | 1.324935 | 0.996841 | 2.66791  | 2.15778  | 4.88123  | 0.959536 | 5.321336 | 1.035907 | 0.412967 | 0.575138 | 0.993235 | 0.146593 | 0.697332 | NA       |
| AT1G21370 | AT1G21370 | 153.3686 | 181.9931 | 176.4086 | 308.0744 | 296.1229 | 332.9448 | 280.1306 | 272.9592 | 208.9166 | 174.6355 | 138.3547 | 167.8169 | 0.858711 | 3.24E-07 | 0.567484 | 0.001733 | -0.0765  | 0.858201 |
| AT1G21380 | AT1G21380 | 407.7941 | 419.2978 | 462.2679 | 653.2663 | 662.4673 | 635.9844 | 610.9515 | 610.6517 | 481.2893 | 361.7449 | 500.2056 | 365.675  | 0.587753 | 0.000255 | 0.393611 | 0.023628 | -0.07523 | 0.844779 |
| AT1G21390 | emb2170   | 59.4452  | 48.17464 | 56.65679 | 129.4985 | 151.705  | 124.6051 | 144.9655 | 119.7568 | 156.1994 | 53.734   | 42.57069 | 62.15439 | 1.248196 | 9.45E-09 | 1.298662 | 3.97E-09 | -0.05303 | 0.934368 |
| AT1G21395 | AT1G21395 | 0        | 0        | 0        | 0        | 0        | 0        | 0        | 0        | 0        | 0        | 0        | 0        | #N/A     | #N/A     | #N/A     | #N/A     | #N/A     | #N/A     |
| AT1G21400 | F24J8.4   | 235.403  | 224.815  | 256.2432 | 448.7081 | 423.3166 | 459.5436 | 508.6816 | 500.6049 | 379.7597 | 253.3174 | 313.9588 | 222.7199 | 0.872824 | 1.82E-07 | 0.933018 | 2.89E-08 | 0.129063 | 0.724707 |
| AT1G21410 | SKP2A     | 105.8125 | 123.1153 | 110.5565 | 140.6337 | 119.9066 | 133.5767 | 140.51   | 133.7824 | 128.8645 | 186.1499 | 163.6311 | 174.0333 | 0.056048 | 0.818861 | 0.086077 | 0.736151 | 0.458264 | 0.985574 |
| AT1G21420 | AT1G21420 | 0        | 0        | 0        | 0        | 0        | 0        | 0        | 0        | 0        | 0        | 0        | 0        | #N/A     | #N/A     | #N/A     | #N/A     | #N/A     | #N/A     |
| AT1G21430 | YUC11     | 0        | 0        | 0        | 0        | 0        | 0        | 0.889303 | 0        | 0.976246 | 0        | 0        | 0        | 0        | NA       | 0.309898 | NA       | 0        | NA       |
| AT1G21440 | AT1G21440 | 523.1177 | 347.928  | 476.4321 | 347.2539 | 353.7575 | 282.1059 | 297.9167 | 296.6947 | 286.0401 | 681.2703 | 611.9536 | 586.3231 | -0.44858 | 0.009122 | -0.60894 | 0.000404 | 0.464894 | 0.039528 |
| AT1G21450 | SCL1      | 387.5827 | 424.6506 | 388.8716 | 444.584  | 380.2562 | 473.4994 | 532.6728 | 557.7861 | 359.2585 | 350.2305 | 349.8778 | 395.7163 | 0.110342 | 0.618538 | 1.267091 | 1.97749  | -0.12701 | 0.737955 |
| AT1G21460 | SWEET1    | 129.5905 | 212.3253 | 218.9012 | 345.6043 | 429.2788 | 291.0775 | 404.7624 | 309.6414 | 628.7604 | 200.5429 | 216.8444 | 156.2119 | 0.885208 | 0.001072 | 1.241334 | 2.62E-06 | 0.033256 | 0.965111 |
| AT1G21470 | AT1G21470 | 1.188904 | 0        | 0        | 0        | 0        | 0        | 1.778607 | 1.07889  | 0.976246 | 0        | 0        | 1.035907 | -0.35669 | NA       | 0.438908 | NA       | -0.0476  | NA       |
| AT1G21475 | AT1G21475 | 0        | 0        | 0        | 0.412416 | 0        | 0        | 0        | 0        | 0        | 0        | 1.330334 | 0        | 0.067751 | NA       | 0        | NA       | 0.180865 | NA       |
| AT1G21480 | AT1G21480 | 128.4016 | 115.976  | 114.6012 | 134.4475 | 115.2693 | 109.6525 | 130.7276 | 107.889  | 104.4583 | 108.4275 | 134.3637 | 131.5601 | 0.009798 | 0.971072 | -0.06375 | 0.819106 | 0.050369 | 0.920201 |
| AT1G21490 | AT1G21490 | 0        | 0        | 0        | 0.662467 | 0        | 0        | 0.889303 | 0        | 0        | 0        | 0        | 0        | 0.097058 | NA       | 0.103384 | NA       | 0        | NA       |
| AT1G21500 | AT1G21500 | 1857.068 | 2064.373 | 1914.742 | 1190.231 | 1324.272 | 1056.651 | 844.8383 | 812.4041 | 1069.966 | 2790.33  | 2928.065 | 1769.328 | -0.68968 | 0.000343 | -1.06888 | 1.14E-08 | 0.350681 | 0.253111 |
| AT1G21510 | AT1G21510 | 7.133424 | 5.352738 | 12.87654 | 7.42348  | 11.26194 | 5.981045 | 7.114428 | 10.7889  | 6.833722 | 9.595356 | 14.63367 | 8.287252 | -0.04936 | 0.943829 | -0.06361 | 0.93112  | 0.24538  | NA       |
| AT1G21520 | AT1G21520 | 55.87849 | 85.64381 | 81.12222 | 539.852  | 655.1801 | 395.7458 | 533.5821 | 359.2703 | 892.2888 | 42.21957 | 43.90102 | 54.90305 | 2.816545 | 4.83E-23 | 2.816545 | 4.83E-23 | -0.59032 | 0.252323 |
| AT1G21525 | AT1G21525 | 8.322328 | 10.70548 | 6.483272 | 154.2434 | 118.5816 | 93.70303 | 243.6692 | 202.8313 | 406.1183 | 6.716749 | 9.312338 | 7.251346 | 3.363724 | 1.32E-20 | 4.511289 | 6.15E-37 | -0.1365  | 0.899414 |
| AT1G21528 | AT1G21528 | 0        | 0        | 0        | 2.062078 | 0.662467 | 0        | 0.889303 | 0        | 0.928738 | 0        | 0        | 0        | 0.474905 | NA       | 0.563305 | NA       | 0        | NA       |
| AT1G21529 | AT1G21529 | 1.188904 | 0        | 0        | 0        | 0        | 0        | 0.889303 | 0        | 0        | 0        | 0        | 0        | -0.20902 | NA       | -0.03919 | NA       | -0.19148 | NA       |
| AT1G21530 | AEF10     | 1.188904 | 0        | 0        | 0.412416 | 0        | 0        | 0        | 0        | 0        | 0        | 1.330334 | 0        | -0.13525 | NA       | -0.22145 | NA       | -0.00291 | NA       |
| AT1G21540 | AE9       | 29.7226  | 24.97944 | 33.47901 | 22.68286 | 18.54908 | 25.91786 | 23.12189 | 36.68226 | 36.1211  | 22.06932 | 35.91902 | 23.82585 | -0.38545 | 0.314361 | 0.094505 | 0.844067 | -0.13101 | 0.873413 |
| AT1G21550 | CML44     | 11.88904 | 10.70548 | 16.73951 | 60.21267 | 69.59066 | 50.83888 | 128.949  | 120.8357 | 265.5389 | 13.4335  | 17.29434 | 19.68222 | 1.90598  | 1.95E-07 | 3.322307 | 2.13E-21 | 0.274226 | 0.778952 |
| AT1G21560 | AT1G21560 | 336.4598 | 312.2431 | 356.6803 | 301.4758 | 340.5082 | 323.9733 | 338.8246 | 311.7992 | 274.3251 | 406.8431 | 383.1362 | 395.7163 | -0.06353 | 0.718983 | -0.12143 | 0.487933 | 0.232562 | 0.307711 |
| AT1G21580 | AT1G21580 | 1326.817 | 1300.715 | 1136.999 | 691.2085 | 575.0216 | 812.4252 | 868.4142 | 1046.523 | 596.4863 | 1120.738 | 1152.069 | 1110.049 | -0.83575 | 0.000015 | -0.55774 | 0.006504 | -0.14989 | 0.706832 |
| AT1G21590 | AT1G21590 | 1198.415 | 1145.486 | 1041.712 | 833.4919 | 737.9885 | 955.9703 | 986.4515 | 1052.997 | 621.8687 | 877.9751 | 803.5217 | 925.0645 | -0.41271 | 0.037072 | -0.34864 | 0.097413 | -0.36751 | 0.21385  |
| AT1G21600 | PTAC6     | 1060.502 | 1106.233 | 1100.944 | 1129.606 | 1210.99  | 1301.874 | 1557.17  | 1647.465 | 1803.126 | 1551.569 | 1592.41  | 1373.612 | 0.153457 | 0.235534 | 0.610751 | 5.04E-08 | 0.462969 | 0.000803 |
| AT1G21610 | AT1G21610 | 343.5932 | 333.654  | 406.8988 | 341.0677 | 329.2462 | 359.8595 | 441.9838 | 515.7094 | 311.4225 | 308.9705 | 339.2352 | 347.0287 | -0.07516 | 0.753946 | 0.21927  |          |          |          |



|           |           |          |          |          |          |          |          |          |          |          |          |          |          |          |           |          |          |          |          |
|-----------|-----------|----------|----------|----------|----------|----------|----------|----------|----------|----------|----------|----------|----------|----------|-----------|----------|----------|----------|----------|
| AT1G22985 | ERF069    | 23.77808 | 32.11643 | 19.31482 | 44.54088 | 41.73544 | 26.9147  | 36.46144 | 32.3667  | 42.95482 | 26.867   | 34.58868 | 19.68222 | 0.592473 | 0.098496  | 0.5481   | 0.157887 | 0.103894 | 0.903758 |
| AT1G22990 | HIPP22    | 1.188904 | 3.568492 | 7.725926 | 21.03319 | 18.54908 | 13.95577 | 8.893035 | 15.10446 | 14.64369 | 2.878607 | 2.660668 | 4.143626 | 1.669034 | 0.001015  | 1.208602 | 0.029892 | -0.24274 | NA       |
| AT1G23000 | AT1G23000 | 95.11232 | 71.36694 | 68.24568 | 111.3522 | 105.9948 | 103.6714 | 96.93408 | 105.7312 | 72.2422  | 81.56053 | 70.5077  | 97.37521 | 0.42982  | 0.074302  | 0.207333 | 0.473303 | 0.80542  | 0.886247 |
| AT1G23010 | LPR1      | 22.58917 | 26.76369 | 24.46543 | 35.88015 | 27.16116 | 15.94945 | 25.7898  | 30.20892 | 24.40615 | 16.31211 | 18.62468 | 8.287252 | 0.143761 | 0.764901  | 0.11859  | 0.822958 | -0.68008 | 0.296514 |
| AT1G23020 | FRO3      | 408.983  | 399.6711 | 363.1188 | 588.9294 | 532.6237 | 589.1329 | 560.2612 | 548.0761 | 292.8738 | 280.1844 | 343.2262 | 466.228  | 0.528778 | 0.019488  | 0.24975  | 0.342646 | -0.38607 | 0.281609 |
| AT1G23030 | PUB11     | 476.7505 | 488.8834 | 419.7753 | 423.1384 | 382.9061 | 505.3983 | 401.4739 | 324.0037 | 332.8999 | 412.6003 | 465.6169 | 266.1166 | -0.08001 | 0.706615  | -0.38206 | 0.036299 | -0.07445 | 0.850060 |
| AT1G23037 | AT1G23037 | 0        | 0        | 0        | 0        | 0        | 0        | 0        | 0        | 0        | 0        | 0        | 0        | #N/A     | #N/A      | #N/A     | #N/A     | #N/A     | #N/A     |
| AT1G23040 | AT1G23040 | 43.98945 | 39.25341 | 36.05432 | 56.91335 | 58.95959 | 45.85468 | 46.24378 | 30.20892 | 78.09968 | 46.05771 | 43.90102 | 39.36445 | 0.143998 | 0.241305  | 0.346996 | 0.372068 | 0.103356 | 0.895643 |
| AT1G23050 | AT1G23050 | 0        | 0        | 0        | 0        | 0        | 0        | 0        | 0        | 0        | 0        | 0        | 0        | #N/A     | #N/A      | #N/A     | #N/A     | #N/A     | #N/A     |
| AT1G23052 | AT1G23052 | 0        | 0        | 0        | 0        | 0        | 0        | 0        | 0        | 0        | 0        | 0        | 0        | #N/A     | #N/A      | #N/A     | #N/A     | #N/A     | #N/A     |
| AT1G23060 | AT1G23060 | 57.06739 | 33.90067 | 43.78025 | 14.02213 | 13.24935 | 14.95261 | 11.56095 | 8.63112  | 6.833722 | 37.42189 | 46.56169 | 32.1131  | -1.56671 | 1.79E-06  | -2.0719  | 1.06E-08 | -0.2277  | 0.733866 |
| AT1G23070 | AT1G23070 | 0        | 0        | 0        | 0        | 0        | 0        | 0        | 0        | 0        | 0        | 0.995936 | 2.660668 | 0        | NA        | 0        | NA       | 0.544752 | NA       |
| AT1G23074 | AT1G23074 | 0        | 0        | 0        | 0        | 0        | 0        | 0        | 0        | 0        | 0        | 0        | 0        | #N/A     | #N/A      | #N/A     | #N/A     | #N/A     | #N/A     |
| AT1G23080 | PIN7      | 1210.304 | 1134.78  | 1206.532 | 371.9988 | 404.7675 | 394.7489 | 418.8619 | 444.5027 | 374.8785 | 930.7496 | 947.1978 | 956.1417 | -1.59132 | 6.39E-56  | -1.5098  | 2.26E-48 | -0.32452 | 0.021525 |
| AT1G23090 | SULTR3    | 172.3911 | 203.404  | 158.3815 | 235.0769 | 213.3145 | 220.3018 | 256.1194 | 252.4602 | 239.1803 | 146.809  | 148.9974 | 155.386  | 0.333375 | 0.038409  | 0.488945 | 0.002245 | -0.22821 | 0.421889 |
| AT1G23100 | AT1G23100 | 21.40027 | 17.84246 | 28.3284  | 44.54088 | 39.74804 | 27.91154 | 16.89677 | 19.42002 | 34.16861 | 23.98839 | 15.96401 | 22.78994 | 0.677664 | 0.076884  | 0.035749 | 0.948468 | -0.09676 | 0.920242 |
| AT1G23110 | AT1G23110 | 2.377808 | 3.568492 | 2.575309 | 16.08421 | 12.58688 | 17.94313 | 5.335821 | 10.7889  | 0.972646 | 1.919071 | 1.330334 | 4.143626 | 1.786528 | 0.001502  | 0.595455 | 0.397493 | -0.11024 | NA       |
| AT1G23120 | AT1G23120 | 5.965712 | 8.92123  | 15.45185 | 21.44561 | 27.16116 | 25.91786 | 25.7898  | 6.47334  | 9.245366 | 9.595356 | 9.312338 | 13.46678 | 1.167801 | 0.015483  | 0.794213 | 0.141177 | 0.161495 | NA       |
| AT1G23130 | AT1G23130 | 4301.454 | 6023.615 | 5526.612 | 3995.482 | 3355.397 | 3309.511 | 2419.795 | 2433.976 | 3049.792 | 4784.245 | 5230.873 | 4376.705 | -0.56131 | 0.000533  | -0.98568 | 2.31E-10 | -0.13659 | 0.669371 |
| AT1G23140 | AT1G23140 | 24.96698 | 30.33218 | 37.34198 | 114.6515 | 121.2315 | 86.72515 | 90.70896 | 73.36452 | 113.2445 | 21.10978 | 11.97301 | 27.96948 | 1.707041 | 1.55E-09  | 1.487609 | 3.39E-07 | -0.51544 | 0.363526 |
| AT1G23145 | RALF2     | 0        | 0        | 0        | 0        | 0        | 0        | 0.889303 | 0        | 0        | 0        | 0        | 0        | 0        | NA        | 0.160764 | NA       | 0        | NA       |
| AT1G23147 | RALF3     | 0        | 0        | 0        | 0        | 0        | 0        | 0.662467 | 0        | 0.889303 | 0        | 0        | 0        | #N/A     | #N/A      | #N/A     | #N/A     | #N/A     | #N/A     |
| AT1G23149 | CpUORF29  | 0        | 0        | 0        | 0        | 0        | 0        | 0        | 0        | 0        | 0        | 0        | 0        | #N/A     | #N/A      | #N/A     | #N/A     | #N/A     | #N/A     |
| AT1G23150 | AT1G23150 | 0        | 0        | 0        | 0        | 0        | 0        | 0        | 0        | 0        | 0        | 0        | 0        | #N/A     | #N/A      | #N/A     | #N/A     | #N/A     | #N/A     |
| AT1G23160 | AT1G23160 | 0        | 0        | 0        | 0        | 0        | 0        | 1.07889  | 0        | 0        | 1.330334 | 0        | 0        | 0        | NA        | 0.160793 | NA       | 0.184979 | NA       |
| AT1G23170 | AT1G23170 | 83.22328 | 67.80135 | 61.80741 | 65.98649 | 68.8966  | 75.7599  | 52.46891 | 56.10228 | 73.21845 | 44.13864 | 41.24035 | 54.90305 | -0.02718 | 0.93583   | -0.22472 | 0.463439 | -0.57364 | 0.133249 |
| AT1G23180 | AT1G23180 | 494.584  | 378.2602 | 365.6938 | 216.9306 | 231.8635 | 280.1123 | 273.0162 | 326.9037 | 207.9404 | 383.8143 | 363.1812 | 365.675  | -0.75529 | 6.98E-05  | -0.6053  | 0.002363 | -0.15311 | 0.69169  |
| AT1G23190 | PGM3      | 941.6119 | 836.8114 | 885.9062 | 624.3972 | 679.029  | 709.7506 | 726.5609 | 753.0652 | 706.8021 | 1000.796 | 1092.204 | 855.6588 | -0.40461 | 0.001575  | -0.28416 | 0.039706 | 0.141387 | 0.547565 |
| AT1G23200 | PME6      | 13.07794 | 12.48972 | 12.87654 | 7.42348  | 5.962205 | 4.984204 | 5.335821 | 15.10446 | 10.73871 | 15.35257 | 9.312338 | 12.43088 | -0.84267 | 0.09516   | -0.26813 | 0.664947 | -0.02317 | NA       |
| AT1G23201 | AT1G23201 | 0        | 0        | 0        | 0.412416 | 0        | 0.662467 | 0        | 0.889303 | 0        | 1.07889  | 0        | 1.330334 | 0.352007 | NA        | 0.352007 | NA       | 0.208051 | NA       |
| AT1G23205 | AT1G23205 | 45.17835 | 49.95889 | 30.9037  | 24.74493 | 16.56168 | 14.95261 | 24.01119 | 22.65669 | 24.40615 | 56.6126  | 74.4987  | 55.93895 | -1.01955 | 0.00136   | -0.75011 | 0.030779 | 0.546787 | 0.254453 |
| AT1G23210 | AT1G23210 | 0        | 0        | 0        | 0.662467 | 0.996841 | 0.889303 | 0        | 0        | 0        | 1.330334 | 0        | 0        | 0.267029 | NA        | 0.151304 | NA       | 0.19832  | NA       |
| AT1G23220 | AT1G23220 | 148.6131 | 180.2088 | 182.8469 | 229.7155 | 197.4152 | 214.3208 | 167.1891 | 171.5435 | 261.6339 | 189.0881 | 200.8804 | 133.6319 | 0.320262 | 0.186934  | 0.226019 | 0.404985 | 0.034495 | 0.955665 |
| AT1G23230 | MED23     | 343.5932 | 271.2054 | 260.1062 | 204.1457 | 141.1055 | 225.286  | 220.5473 | 270.8014 | 123.9832 | 260.9342 | 259.4151 | 202.0011 | -0.59147 | 0.030739  | -0.48645 | 0.096432 | -0.2674  | 0.591044 |
| AT1G23240 | PGX7      | 1.188904 | 7.136984 | 0        | 0        | 0        | 0        | 0        | 0        | 0        | 5.757214 | 5.321336 | 5.179533 | -1.26899 | 0.043148  | -1.11146 | 0.087814 | 0.754795 | NA       |
| AT1G23250 | AT1G23250 | 0        | 0        | 1.287654 | 0        | 0        | 0        | 0        | 0        | 0        | 3.838143 | 0        | 1.035907 | -0.30133 | NA        | -0.25438 | NA       | 0.517337 | NA       |
| AT1G23260 | UEV1A     | 219.9472 | 224.815  | 244.6543 | 384.7837 | 414.042  | 412.6921 | 260.5659 | 286.9847 | 372.926  | 325.2826 | 215.5141 | 258.9766 | 0.792606 | 1.62E-05  | 0.405269 | 0.049904 | 0.213613 | 0.546872 |
| AT1G23270 | AT1G23270 | 0        | 0        | 0        | 0        | 0        | 0        | 0        | 0        | 0        | 0        | 0        | 0        | #N/A     | #N/A      | #N/A     | #N/A     | #N/A     | #N/A     |
| AT1G23280 | AT1G23280 | 197.3581 | 194.4828 | 171.258  | 213.6313 | 213.9769 | 199.3682 | 197.4254 | 178.0168 | 262.6102 | 202.462  | 160.9704 | 213.3967 | 0.154887 | 0.486892  | 0.178187 | 0.444869 | 0.046068 | 0.934763 |
| AT1G23290 | RPL27AB   | 776.3543 | 690.5032 | 705.6346 | 1011.243 | 881.7439 | 646.9497 | 770.1368 | 552.3916 | 1495.609 | 714.854  | 855.4047 | 1200.616 | 0.20368  | 0.655646  | 0.338564 | 0.452105 | 0.316391 | 0.656746 |
| AT1G23300 | AT1G23300 | 0        | 0        | 0        | 0.996841 | 0        | 1.07889  | 0        | 0        | 0        | 0        | 0        | 0        | 0.132403 | NA        | 0.15984  | NA       | 0.162223 | NA       |
| AT1G23310 | GGAT1     | 18386.4  | 18477.65 | 16901.75 | 9830.75  | 10461.02 | 10062.11 | 13641.92 | 14261.85 | 16509.3  | 14637.72 | 13855.43 | 16606.62 | -0.81742 | 8.88E-14  | -0.27321 | 0.027266 | -0.25118 | 0.147459 |
| AT1G23320 | TAR1      | 0        | 0        | 0        | 0.412416 | 0        | 0.996841 | 0        | 0        | 0        | 0        | 0        | 0        | 0.224618 | NA        | 0.091670 | NA       | 0.517167 | NA       |
| AT1G23330 | AT1G23330 | 112.9459 | 130.25   | 123.6148 | 134.4475 | 126.5312 | 100.6809 | 104.9378 | 142.4135 | 111.292  | 107.468  | 94.45371 | 103.5907 | 0.000446 | 0.999192  | -0.03086 | 0.916706 | -0.24642 | 0.517167 |
| AT1G23340 | AT1G23340 | 41.61164 | 46.3904  | 45.0679  | 18.5587  | 17.22415 | 14.95261 | 16.00746 | 9.710009 | 19.52492 | 42.21957 | 47.89202 | 33.14901 | -1.26595 | 5.42E-05  | -1.40894 | 2.95E-05 | -0.10347 | 0.888347 |
| AT1G23350 | AT1G23350 | 1.188904 | 1.784246 | 0        | 0        | 1.987402 | 0        | 0.889303 | 1.07889  | 0.976246 | 4.797678 | 3.991002 | 2.071813 | -0.22069 | 0.776861  | -0.00703 | 0.993444 | 0.882103 | NA       |
| AT1G23360 | MENG      | 211.6249 | 223.0308 | 293.5852 | 277.9681 | 314.672  | 273.1344 | 329.9136 | 299.9314 | 375.8547 | 304.1728 | 288.6825 | 302.4847 | 0.242655 | 0.183281  | 0.455188 | 0.009095 | 0.290533 | 0.28611  |
| AT1G23380 | KNAT6     | 54.68958 | 33.90067 | 41.20494 | 65.57408 | 59.62205 | 58.81361 | 55.13682 | 47.47116 | 57.59851 | 64.9353  | 39.91002 | 62.4282  | 0.461974 | 0.105245  | 0.265642 | 0.429874 | 0.264395 | 0.617081 |
| AT1G23390 | AT1G23390 | 1550.331 | 1875.243 | 1703.567 | 2104.557 | 2130.495 | 2205.012 | 1782.164 | 1960.343 | 2476.736 | 1674.39  | 1568.464 | 1601.511 | 0.325104 | 0.025915  | 0.725527 | 0.074467 | -0.07974 | 0.794433 |
| AT1G23400 | CAF2      | 765.6541 | 829.6744 | 688.8951 | 639.6566 | 592.9082 | 618.0413 | 678.5386 | 745.5129 | 744.8757 | 757.0736 | 729.023  | 801.7917 | -0.29694 | 0.013337  | -0.07157 | 0.640526 | 0.006418 | 0.985847 |
| AT1G23410 | RPS27AA   | 21.40027 | 28.54794 | 30.9037  | 45.36571 | 40.87047 | 47.03518 | 18.34113 | 41.00233 | 56.6126  | 35.91902 | 47.6517  | 0.676564 | 0.053554 | -0.002594 | 0.99603  | 0.748269 | 0.13913  | 0.984826 |
| AT1G23420 | YAB4      | 2.377808 | 0        | 0        | 0        | 0        | 0        | 0        | 0        | 0        | 0.995936 | 0        | 0        | -0.38193 | NA        | -0.36181 | NA       | -0.19229 | NA       |
| AT1G23440 | AT1G23440 | 355.4823 | 422.8663 | 448.1037 | 602.9516 | 643.2557 | 595.1139 | 556.704  | 562.1017 | 716.5646 | 421.2361 | 484.2416 | 370.8545 | 0.578397 | 0.000297  | 0.573389 | 0.000447 | 0.055443 | 0.88731  |
| AT1G23450 | AT1G23450 | 10.70014 | 12.48972 | 3.862963 | 4.536571 | 5.962205 | 9.968408 | 13.33955 | 21.5778  | 3.904984 | 8.635821 | 18.62468 | 7.251346 | -0.33289 | 0.614109  | 0.410949 | 0.540923 | 0.258828 | NA       |
| AT1G23460 | AT1G23460 | 72.52314 | 82.07532 | 74.68395 | 60.12267 | 45.04777 | 66.78833 | 72.92289 | 45.31338 | 38.07359 | 92.11543 | 93.12338 |          |          |           |          |          |          |          |

|           |           |          |          |          |          |          |          |          |          |           |          |          |          |          |          |           |          |          |          |
|-----------|-----------|----------|----------|----------|----------|----------|----------|----------|----------|-----------|----------|----------|----------|----------|----------|-----------|----------|----------|----------|
| AT1G23950 | AT1G23950 | 206.8693 | 212.3253 | 215.0383 | 249.5114 | 262.9995 | 273.1344 | 254.3408 | 258.9336 | 263.5864  | 237.0053 | 207.5321 | 209.2531 | 0.300633 | 0.041793 | 0.288959  | 0.067135 | 0.047236 | 0.894073 |
| AT1G23960 | AT1G23960 | 448.2168 | 519.2156 | 538.2395 | 637.5945 | 691.6158 | 641.9655 | 672.3134 | 628.9928 | 608.2013  | 565.1665 | 522.8213 | 484.8043 | 0.387008 | 0.002397 | 0.342062  | 0.010552 | 0.065274 | 0.821978 |
| AT1G23965 | AT1G23965 | 20.2137  | 19.62671 | 11.58889 | 8.284831 | 1.324935 | 2.990522 | 4.446517 | 1.07889  | 0.976246  | 14.39303 | 11.97301 | 12.43088 | -2.54328 | 7.64E-07 | -2.1467   | 5.98E-05 | -0.32528 | NA       |
| AT1G23970 | AT1G23970 | 123.646  | 124.8972 | 141.642  | 103.1039 | 97.38269 | 96.69356 | 107.6057 | 119.7568 | 95.67211  | 160.2424 | 150.3277 | 132.596  | -0.38151 | 0.048599 | -0.27025  | 0.215319 | 0.178501 | 0.612829 |
| AT1G23980 | AT1G23980 | 45.17835 | 58.88012 | 61.80741 | 43.30364 | 43.72284 | 35.88627 | 49.80099 | 45.31338 | 48.8123   | 57.57214 | 66.5167  | 66.29802 | -0.38967 | 0.154993 | -0.18388  | 0.575457 | 0.196932 | 0.699043 |
| AT1G23990 | AT1G23990 | 0        | 1.784246 | 1.287654 | 0        | 0        | 0        | 1.778607 | 0        | 0         | 0        | 0        | 0        | -0.52312 | NA       | -0.12839  | NA       | -0.26411 | NA       |
| AT1G24000 | AT1G24000 | 0        | 0        | 0        | 0.412416 | 0        | 0        | 0        | 0        | 0         | 0        | 0        | 0        | 0.095918 | NA       | 0         | NA       | 0        | NA       |
| AT1G24010 | AT1G24010 | 0        | 0        | 0        | 0        | 0        | 0        | 0        | 0        | 0         | 0        | 0        | 0        | #N/A     | #N/A     | #N/A      | #N/A     | #N/A     | #N/A     |
| AT1G24020 | MLP423    | 492.2062 | 479.9622 | 482.8704 | 631.8207 | 705.5276 | 441.6005 | 369.0609 | 285.9058 | 554.5077  | 698.5419 | 854.0744 | 631.903  | 0.281029 | 0.292118 | -0.25587  | 0.371811 | 0.562894 | 0.09848  |
| AT1G24030 | AT1G24030 | 20.21137 | 19.62671 | 21.89012 | 16.08421 | 10.59948 | 20.93366 | 16.00746 | 17.26224 | 13.66744  | 28.78607 | 25.27635 | 13.46678 | -0.35786 | 0.438423 | -0.35131  | 0.484732 | 0.113306 | 0.907455 |
| AT1G24040 | AT1G24040 | 136.724  | 114.1917 | 158.3815 | 172.3897 | 139.1181 | 145.5388 | 170.7463 | 185.5691 | 182.558   | 127.6182 | 142.3457 | 166.781  | 0.152536 | 0.498252 | 0.375817  | 0.072408 | 0.079971 | 0.86061  |
| AT1G24050 | AT1G24050 | 359.049  | 396.1026 | 427.5012 | 454.8944 | 501.4877 | 417.6763 | 470.4415 | 445.5815 | 613.0825  | 265.7914 | 188.9074 | 450.6193 | 0.208213 | 0.485869 | 0.355282  | 0.221334 | -0.36434 | 0.401389 |
| AT1G24060 | AT1G24060 | 0        | 0        | 0        | 0        | 0        | 0        | 0        | 0.889303 | 0         | 0        | 0        | 0        | 0        | NA       | 0         | NA       | 0        | NA       |
| AT1G24062 | AT1G24062 | 0        | 0        | 0        | 0        | 0.662467 | 0        | 0        | 0        | 0         | 0        | 0        | 0        | 0.128567 | NA       | 0.160764  | NA       | 0        | NA       |
| AT1G24068 | AT1G24068 | 0        | 0        | 0        | 0        | 0        | 0        | 0        | 0        | 0         | 0        | 0        | 0        | -0.75346 | 0.001123 | -0.36523  | 0.167416 | 0.586524 | 0.05963  |
| AT1G24070 | CSLA10    | 130.7794 | 74.93833 | 110.7383 | 60.21267 | 67.57166 | 58.81361 | 88.93035 | 90.62675 | 67.36097  | 174.6355 | 172.9434 | 140.8833 | #N/A     | #N/A     | #N/A      | #N/A     | #N/A     | #N/A     |
| AT1G24080 | AT1G24080 | 0        | 0        | 0        | 0        | 0        | 0        | 0        | 0        | 0         | 0        | 0        | 0        | 0.254955 | 0.499651 | -0.70061  | 0.063276 | -0.78414 | 0.133779 |
| AT1G24090 | AT1G24090 | 30.9115  | 24.97944 | 43.78025 | 45.36571 | 35.11077 | 39.87363 | 23.12189 | 19.42002 | 16.59618  | 21.10978 | 19.95501 | 14.50269 | 1.790392 | 7.79E-09 | 1.506967  | 3.47E-06 | 0.650944 | 0.236632 |
| AT1G24095 | AT1G24095 | 20.21137 | 14.27397 | 14.1642  | 58.97543 | 62.93439 | 69.77885 | 44.46517 | 53.9445  | 57.59851  | 35.50282 | 21.28534 | 24.86176 | 0.112274 | 0.653286 | 0.473586  | 0.026672 | -0.02711 | 0.960974 |
| AT1G24100 | UGT7481   | 989.1681 | 620.9176 | 811.2222 | 837.616  | 946.0033 | 845.321  | 985.3483 | 981.7898 | 1433.1229 | 877.9751 | 690.4433 | 810.0789 | #N/A     | #N/A     | #N/A      | #N/A     | #N/A     | #N/A     |
| AT1G24110 | PER6      | 0        | 0        | 0        | 0        | 0        | 0        | 0        | 0        | 0         | 0        | 0        | 0        | -0.44332 | 0.001351 | -0.34822  | 0.018695 | 0.023263 | 0.950436 |
| AT1G24120 | AT1G24120 | 395.905  | 403.2396 | 445.5284 | 307.662  | 309.3722 | 294.068  | 313.9241 | 352.797  | 309.47    | 430.8315 | 368.5025 | 463.0502 | -1.01632 | 0.116447 | -1.00403  | 0.129392 | -0.16655 | NA       |
| AT1G24130 | AT1G24130 | 3.566712 | 5.352738 | 0        | 0.412416 | 0        | 0.996841 | 0        | 0        | 0.976246  | 1.919071 | 2.660668 | 2.071813 | 1.702782 | 8.13E-08 | 2.202111  | 1.75E-12 | -0.756   | 0.202346 |
| AT1G24140 | AT1G24140 | 13.07794 | 32.11643 | 27.04074 | 78.35896 | 72.20893 | 103.6714 | 91.59826 | 113.2834 | 159.1281  | 14.39303 | 31.30334 | 10.35907 | 2.465155 | 1.48E-26 | 1.870074  | 4.12E-15 | -0.78026 | 0.053578 |
| AT1G24145 | AT1G24145 | 34.47821 | 64.23286 | 50.21852 | 303.1254 | 298.7727 | 259.1786 | 178.75   | 149.9657 | 236.2515  | 23.98839 | 31.92802 | 25.89766 | 1.889138 | 2.49E-31 | 0.413551  | 0.032611 | -0.43042 | 0.118262 |
| AT1G24147 | AT1G24147 | 181.9023 | 230.1677 | 230.4901 | 870.1969 | 788.9985 | 770.5579 | 254.3408 | 270.8014 | 333.8761  | 185.1904 | 129.0424 | 154.3501 | 0.408672 | 0.009468 | 0.130464  | 0.893093 | 0.142969 | 0.639778 |
| AT1G24148 | AT1G24148 | 256.8033 | 297.9617 | 262.6815 | 394.6817 | 341.1706 | 346.9006 | 297.9167 | 258.9336 | 374.321   | 321.4444 | 324.6015 | 255.8689 | 1.227592 | 1.3E-10  | 1.058407  | 7.78E-08 | -0.62463 | 0.039744 |
| AT1G24150 | AT1G24150 | 115.3237 | 108.839  | 77.25926 | 215.6933 | 261.6746 | 244.226  | 192.0896 | 208.2258 | 239.1803  | 57.57214 | 74.4987  | 61.11849 | 0.095918 | NA       | 0         | NA       | 0        | NA       |
| AT1G24159 | AT1G24159 | 0        | 0        | 0        | 0.412416 | 0        | 0        | 0        | 0        | 0         | 0        | 0        | 0        | -0.27918 | 0.018264 | -0.19187  | 0.141399 | 0.012569 | 0.970025 |
| AT1G24160 | AT1G24160 | 789.4322 | 827.8902 | 763.579  | 618.6234 | 650.5429 | 691.8075 | 732.7861 | 710.9885 | 635.5361  | 763.7904 | 848.7531 | 789.3608 | -0.55699 | 0.002719 | -0.31015  | 0.070319 | -0.16244 | 0.579804 |
| AT1G24170 | GATL8     | 527.8734 | 544.195  | 503.4728 | 323.3338 | 339.1832 | 405.7142 | 353.9428 | 414.2937 | 497.8855  | 474.0106 | 454.9742 | 474.4452 | 0.265637 | 0.100304 | 0.209171  | 0.240479 | 0.199279 | 0.963091 |
| AT1G24180 | IAR4      | 324.5708 | 244.4417 | 284.5716 | 341.8925 | 345.1454 | 348.8943 | 337.9353 | 294.537  | 362.1873  | 316.6468 | 267.3971 | 284.8743 | -0.57372 | 0.012287 | -0.38733  | 0.121743 | -0.30703 | 0.430248 |
| AT1G24190 | SNL3      | 757.3318 | 606.6437 | 513.7741 | 388.4955 | 386.8809 | 471.5057 | 594.0547 | 520.025  | 308.4937  | 498.9585 | 508.1876 | 500.3429 | -0.2184  | NA       | -0.20558  | NA       | -0.19918 | NA       |
| AT1G24200 | AT1G24200 | 1.188904 | 0        | 0        | 0        | 0        | 0.662467 | 0        | 0        | 0         | 0        | 0        | 0        | 0.625567 | 0.190965 | 0.745245  | 0.132162 | 0.111802 | 0.922761 |
| AT1G24210 | AT1G24210 | 15.45575 | 7.136984 | 11.58889 | 15.25938 | 28.48609 | 14.95261 | 15.11816 | 20.49891 | 29.28738  | 15.35257 | 11.97301 | 11.39497 | #N/A     | #N/A     | #N/A      | #N/A     | #N/A     | #N/A     |
| AT1G24212 | AT1G24212 | 0        | 0        | 0        | 0        | 0        | 0        | 0        | 0        | 0         | 0        | 0        | 0        | -0.14366 | NA       | 0.218514  | NA       | 0.114915 | NA       |
| AT1G24220 | AT1G24220 | 1.188904 | 0        | 0        | 0        | 0.662467 | 0        | 0        | 0        | 0         | 0        | 0        | 0        | -0.26505 | NA       | -0.24311  | NA       | 0.086641 | NA       |
| AT1G24230 | AT1G24230 | 0        | 1.784246 | 0        | 0        | 0        | 0        | 0        | 0        | 0         | 0        | 0        | 0        | 0.269427 | 0.232511 | 0.451852  | 0.042577 | 0.199229 | 0.623121 |
| AT1G24240 | AT1G24240 | 86.78999 | 73.15409 | 72.10864 | 94.85558 | 96.72022 | 90.71251 | 111.1629 | 97.10009 | 113.2445  | 81.56053 | 91.79304 | 96.33931 | -0.22145 | NA       | -0.10395  | NA       | 0.129861 | NA       |
| AT1G24250 | AT1G24250 | 0        | 1.784246 | 0        | 0.412416 | 0        | 0        | 0.889303 | 0        | 0         | 0        | 0        | 0        | #N/A     | #N/A     | #N/A      | #N/A     | #N/A     | #N/A     |
| AT1G24256 | AT1G24256 | 0        | 0        | 0        | 0        | 0        | 0        | 0        | 0        | 0         | 0        | 0        | 0        | -1.58149 | 4.21E-06 | -1.55668  | 1.68E-05 | 0.910936 | 0.039686 |
| AT1G24260 | SEP3      | 63.01191 | 51.74313 | 41.20494 | 19.79595 | 19.21155 | 4.984204 | 16.00746 | 16.18335 | 14.64369  | 96.9131  | 133.0334 | 76.65708 | -0.38625 | 0.445182 | -0.65136  | 0.208618 | 0.084117 | NA       |
| AT1G24265 | AT1G24265 | 14.26685 | 17.84246 | 18.02716 | 14.84696 | 9.937009 | 10.96525 | 11.56095 | 7.55223  | 9.76246   | 21.10978 | 7.982004 | 22.78994 | 0.345844 | 0.023666 | 0.234127  | 0.172935 | -0.24098 | 0.351736 |
| AT1G24267 | AT1G24267 | 236.5919 | 226.5992 | 235.6407 | 326.6331 | 291.4856 | 269.147  | 266.791  | 294.537  | 264.5627  | 198.6239 | 182.2558 | 208.2172 | -0.07657 | 0.929286 | 0.411383  | 0.521805 | 0.14175  | NA       |
| AT1G24270 | AT1G24270 | 3.566712 | 0        | 0        | 1.287654 | 2.474493 | 1.987402 | 0        | 3.557214 | 1.07889   | 5.857476 | 2.878607 | 3.991002 | 0.269833 | 0.34625  | 0.094133  | 0.745566 | -0.09767 | 0.878139 |
| AT1G24280 | G6P3      | 48.74506 | 46.3904  | 46.35556 | 61.86234 | 54.32232 | 54.82624 | 54.24751 | 53.9445  | 45.88356  | 44.13864 | 37.24935 | 49.72351 | -0.77042 | 0.009549 | -0.53248  | 0.108561 | -0.19427 | 0.752644 |
| AT1G24290 | AT1G24290 | 41.61164 | 53.52738 | 41.20494 | 22.27044 | 25.83622 | 29.90522 | 29.34701 | 34.52448 | 27.34889  | 42.21957 | 33.25835 | 40.40035 | -0.60539 | 0.011485 | -0.24099  | 0.394696 | -0.24694 | 0.570562 |
| AT1G24300 | AT1G24300 | 523.1177 | 463.904  | 347.6667 | 289.5157 | 230.5386 | 344.9066 | 399.2973 | 470.396  | 258.8477  | 382.8547 | 363.1812 | 370.8545 | -0.02982 | 0.927435 | -0.41316  | 0.127505 | -0.28769 | 0.511961 |
| AT1G24310 | NUP54     | 112.9459 | 121.3287 | 86.27284 | 114.2391 | 106.6572 | 88.71883 | 86.26244 | 81.99564 | 68.33722  | 64.28889 | 87.80204 | 107.7343 | 0.983834 | 0.130373 | 0.265638  | 0.74101  | -0.27328 | NA       |
| AT1G24320 | GCS2      | 0        | 0        | 0        | 2.575309 | 5.773818 | 5.299738 | 0.996841 | 0        | 2.15778   | 9.228738 | 0.995936 | 0        | -0.62235 | 0.030142 | -0.057805 | 0.883269 | 0.036131 | 0.961988 |
| AT1G24330 | PUB6      | 76.08985 | 53.52738 | 39.91728 | 31.34358 | 37.76063 | 40.87047 | 54.24751 | 61.41784 | 63.45599  | 51.81492 | 65.18636 | 59.04667 | -0.82139 | 0.000284 | -0.83718  | 0.000326 | -0.22818 | 0.595754 |
| AT1G24340 | EMB260    | 254.4254 | 223.0308 | 215.0383 | 129.4983 | 94.73282 | 162.485  | 149.403  | 140.2557 | 89.81463  | 185.1904 | 192.8984 | 210.289  | 0.473151 | 0.000116 | 0.437151  | 0.032376 | -0.03589 | 0.946238 |
| AT1G24350 | AT1G24350 | 97.49012 | 132.0342 | 115.8889 | 179.8132 | 190.1281 | 195.3808 | 168.0784 | 162.9124 | 135.6982  | 123.7801 | 97.11438 | 110.842  | 0.315879 | 0.11067  | 0.243646  | 0.257259 | -0.04186 | 0.929642 |
| AT1G24360 | AT1G24360 | 784.6766 | 706.5614 | 827.9617 | 925.4605 | 967.2022 | 1012.79  | 727.4502 | 805.9308 | 1226.165  | 735.0043 | 722.3713 | 795.5762 | -0.276   |          |           |          |          |          |

|           |           |          |          |          |          |          |          |          |          |          |          |          |          |           |          |           |          |           |          |
|-----------|-----------|----------|----------|----------|----------|----------|----------|----------|----------|----------|----------|----------|----------|-----------|----------|-----------|----------|-----------|----------|
| AT1G25053 | AT1G25053 | 5.94452  | 7.136984 | 6.438272 | 4.536571 | 3.974804 | 3.987363 | 7.114428 | 6.47334  | 3.904984 | 4.797678 | 9.312338 | 9.323159 | -0.46555  | 0.463209 | -0.10444  | 0.893134 | 0.20192   | NA       |
| AT1G25054 | LPXC4     | 199.7359 | 239.089  | 222.7642 | 266.4205 | 259.6872 | 227.2797 | 216.99   | 196.358  | 196.2254 | 275.3687 | 316.6195 | 234.1149 | 0.195901  | 0.492083 | -0.10894  | 0.618857 | 0.35176   | 0.266880 |
| AT1G25055 | AT1G25055 | 166.4466 | 203.404  | 162.2444 | 209.9195 | 198.0777 | 175.444  | 156.5174 | 190.9635 | 177.6768 | 117.0633 | 138.3547 | 121.2011 | 0.149107  | 0.260301 | -0.01115  | 0.965305 | -0.48376  | 0.052616 |
| AT1G25083 | AT1G25083 | 17.83356 | 17.84246 | 12.87654 | 40.41673 | 48.36011 | 53.8294  | 42.68657 | 46.39227 | 59.55101 | 21.10978 | 22.61568 | 10.35907 | 1.403896  | 3.92E-05 | 1.470379  | 2.42E-05 | 0.115923  | 0.900019 |
| AT1G25097 | AT1G25097 | 19.02246 | 17.84246 | 16.73951 | 27.63184 | 34.4483  | 18.93997 | 30.23631 | 17.26224 | 27.33489 | 25.90746 | 31.92802 | 30.04129 | 0.550666  | 0.164911 | 0.432653  | 0.33106  | 0.628043  | 0.299685 |
| AT1G25098 | AT1G25098 | 477.9394 | 453.1985 | 524.0753 | 450.7702 | 504.8001 | 521.3477 | 621.6232 | 411.0571 | 386.5934 | 630.4149 | 790.2184 | 539.7073 | 0.017893  | 0.950326 | -0.03427  | 0.905588 | 0.41507   | 0.179952 |
| AT1G25112 | AT1G25112 | 1.188904 | 3.568492 | 0        | 0.824831 | 0        | 0        | 0        | 0        | 0        | 0        | 1.330334 | 0        | -0.48955  | NA       | -0.66998  | NA       | -0.43356  | NA       |
| AT1G25141 | AT1G25141 | 8.322328 | 12.48972 | 3.862963 | 3.299325 | 1.987402 | 4.984204 | 8.003731 | 6.47334  | 1.952492 | 2.878607 | 5.321336 | 4.143626 | -0.89487  | 0.144112 | -0.38274  | 0.597311 | -0.68407  | NA       |
| AT1G25145 | LPXC4     | 96.30122 | 112.4075 | 103.0123 | 103.5163 | 104.6698 | 118.6241 | 96.93408 | 104.6523 | 93.71962 | 98.83217 | 82.48071 | 67.33392 | 0.066237  | 0.802169 | -0.06981  | 0.810208 | -0.30539  | 0.402792 |
| AT1G25150 | AT1G25150 | 158.1242 | 169.5034 | 159.6691 | 212.394  | 215.9643 | 181.425  | 184.9751 | 169.3857 | 164.0093 | 97.87263 | 145.0064 | 122.237  | 0.327191  | 0.082596 | 0.091654  | 0.705008 | -0.41543  | 0.13913  |
| AT1G25155 | AT1G25155 | 17.83356 | 12.48972 | 19.31482 | 42.06639 | 39.08557 | 51.83572 | 39.12935 | 60.41784 | 52.71728 | 16.31211 | 13.30334 | 10.35907 | 1.262306  | 0.002011 | 1.449697  | 2.44E-05 | -0.29568  | 0.70827  |
| AT1G25175 | AT1G25175 | 502.9064 | 508.5101 | 639.9642 | 574.4949 | 674.3917 | 576.174  | 634.9627 | 499.526  | 552.5552 | 605.467  | 554.7493 | 654.6929 | 0.140521  | 0.440293 | 0.030017  | 0.893476 | 0.133712  | 0.662311 |
| AT1G25180 | AT1G25180 | 0        | 0        | 0        | 0.412416 | 0        | 0.996841 | 0        | 0        | 0        | 0        | 0        | 1.035907 | 0.245858  | NA       | 0         | NA       | 0.179036  | NA       |
| AT1G25209 | AT1G25209 | 5.911232 | 10.70548 | 6.438272 | 4.948987 | 2.649869 | 6.977885 | 6.225124 | 10.7889  | 3.904984 | 4.797678 | 6.65167  | 9.323159 | -0.67875  | 0.250557 | -0.26182  | 0.712712 | -0.26059  | NA       |
| AT1G25210 | LPXC1     | 91.5456  | 99.91778 | 91.42346 | 115.0639 | 122.5564 | 109.6525 | 86.26244 | 113.2834 | 96.64835 | 98.83217 | 75.82904 | 96.33931 | 0.296585  | 0.175248 | 0.064198  | 0.825187 | -0.04504  | 0.934105 |
| AT1G25211 | AT1G25211 | 156.9353 | 144.5239 | 144.2173 | 187.6491 | 167.6042 | 176.4408 | 170.7463 | 165.0702 | 180.6055 | 94.03449 | 91.79304 | 124.3088 | 0.250654  | 0.185892 | 0.206282  | 0.325458 | -0.5085   | 0.045757 |
| AT1G25220 | ASB1      | 146.2352 | 140.9554 | 136.4914 | 444.584  | 452.4651 | 483.4678 | 529.1356 | 517.6762 | 652.1332 | 166.9592 | 121.8534 | 104.8833 | 1.663721  | 1.58E-23 | 1.959863  | 2.93E-32 | 0.277348  | 0.385722 |
| AT1G25230 | PAP4      | 611.0966 | 588.8012 | 594.8963 | 241.6755 | 197.4152 | 266.1565 | 183.1965 | 269.7225 | 220.6326 | 144.4844 | 492.2418 | 403.0912 | 1.32321   | 2.17E-15 | -1.32321  | 2.78E-16 | -0.32628  | 0.238435 |
| AT1G25240 | AT1G25240 | 0        | 0        | 1.784246 | 0        | 0        | 0        | 0        | 0        | 0        | 0        | 0        | 0        | -0.2184   | NA       | -0.20558  | NA       | -0.19918  | NA       |
| AT1G25250 | IDD16     | 38.04493 | 19.62671 | 30.9037  | 23.09527 | 24.51129 | 24.92102 | 28.45771 | 32.3667  | 40.02609 | 40.3005  | 34.58868 | 27.96948 | -0.30896  | 0.414245 | -0.139411 | 0.753766 | 0.169981  | 0.815889 |
| AT1G25260 | AT1G25260 | 636.0636 | 663.7395 | 672.1556 | 734.5121 | 777.7366 | 776.539  | 775.4276 | 704.5151 | 706.8021 | 731.1661 | 782.2364 | 638.1184 | 0.212328  | 0.093681 | 0.149102  | 0.289361 | 0.123167  | 0.58653  |
| AT1G25270 | AT1G25270 | 0        | 0        | 0        | 0        | 0.662467 | 0        | 0.889303 | 0        | 0.976246 | 0        | 0        | 0        | 0.109442  | NA       | 0.323202  | NA       | 0         | NA       |
| AT1G25275 | AT1G25275 | 237.7808 | 212.3253 | 227.9148 | 682.9602 | 630.6688 | 483.4678 | 870.6281 | 716.3829 | 1824.604 | 301.2942 | 359.1902 | 444.4039 | 1.321277  | 2.58E-06 | 2.194826  | 5.82E-16 | 0.6579    | 0.123972 |
| AT1G25280 | TULP10    | 328.1375 | 312.2431 | 274.2704 | 292.8151 | 310.6972 | 359.8595 | 322.8172 | 324.7459 | 305.565  | 256.196  | 248.7725 | 267.2639 | 0.066112  | 0.718143 | 0.059894  | 0.76821  | -0.23897  | 0.327909 |
| AT1G25290 | RLB10     | 123.6746 | 101.7023 | 103.6148 | 79.18379 | 68.8966  | 66.78833 | 81.81592 | 111.1257 | 144.4844 | 156.4043 | 125.0514 | 111.8779 | -0.67052  | 0.006043 | -0.05864  | 0.807469 | 0.162915  | 0.742777 |
| AT1G25300 | AT1G25300 | 0        | 0        | 0        | 0        | 0        | 0        | 0.889303 | 0        | 0        | 0        | 0        | 0        | 0         | NA       | 0.160764  | NA       | 0         | NA       |
| AT1G25310 | MEE8      | 0        | 0        | 0        | 0        | 0.662467 | 0        | 1.07889  | 0        | 0        | 0        | 0        | 0        | 0.098648  | NA       | 0.150881  | NA       | 0         | NA       |
| AT1G25320 | AT1G25320 | 90.3567  | 114.1917 | 74.68395 | 102.6915 | 94.73282 | 95.69671 | 126.2811 | 144.5713 | 88.83839 | 78.68192 | 87.80204 | 116.0215 | 0.08257   | 0.795029 | 0.362168  | 0.196425 | 0.029592  | 0.96566  |
| AT1G25330 | BHLH75    | 1.188904 | 3.568492 | 0        | 0        | 0        | 0        | 0        | 1.07889  | 0        | 0        | 0        | 0        | -0.73648  | NA       | -0.47718  | NA       | -0.67799  | NA       |
| AT1G25340 | MYB116    | 0        | 0        | 0        | 0        | 0        | 0        | 0.889303 | 0        | 0        | 0        | 0        | 0        | 0         | NA       | 0.160764  | NA       | 0         | NA       |
| AT1G25350 | OVA9      | 499.3397 | 430.0033 | 502.1852 | 403.3424 | 412.0546 | 429.6384 | 445.541  | 434.7926 | 348.5198 | 418.3575 | 432.3585 | 462.0143 | -0.20495  | 0.178362 | -0.2214   | 0.166621 | -0.12754  | 0.639577 |
| AT1G25360 | PCMP-H74  | 21.40027 | 17.84246 | 23.17778 | 20.20836 | 22.92734 | 20.45398 | 32.3667  | 15.61994 | 23.02886 | 18.62468 | 16.65475 | 16.5745  | -0.089231 | 0.873031 | 0.098233  | 0.855527 | -0.09557  | 0.922046 |
| AT1G25370 | AT1G25370 | 34.47821 | 30.33218 | 32.19136 | 79.18379 | 89.70762 | 88.71883 | 47.13308 | 50.70783 | 78.09968 | 28.78607 | 34.58868 | 23.82585 | 1.370703  | 7.61E-07 | 0.79527   | 0.10103  | -0.164    | 0.815889 |
| AT1G25375 | AT1G25375 | 98.67039 | 99.91778 | 109.4506 | 123.7247 | 118.5816 | 110.6493 | 96.0199  | 106.8101 | 85.90965 | 116.1038 | 93.12338 | 96.33931 | 0.197511  | 0.372658 | -0.07669  | 0.782112 | -0.00601  | 0.992056 |
| AT1G25380 | NDT2      | 118.7583 | 192.6986 | 162.2444 | 218.9927 | 200.0651 | 228.2765 | 189.4216 | 183.4113 | 189.3917 | 146.809  | 178.2648 | 190.6068 | 0.167791  | 0.39532  | -0.02964  | 0.90595  | -0.15543  | 0.652681 |
| AT1G25390 | AT1G25390 | 142.6685 | 119.5445 | 103.0123 | 277.5557 | 227.8887 | 290.8007 | 279.2413 | 306.4047 | 243.0553 | 106.5085 | 125.0514 | 103.5907 | 1.090164  | 2.25E-09 | 1.448213  | 4.34E-10 | -0.13149  | 0.760644 |
| AT1G25400 | AT1G25400 | 13.07794 | 10.70548 | 21.89012 | 18.74622 | 173.5664 | 244.226  | 281.0199 | 334.4559 | 474.4556 | 18.23118 | 11.97301 | 14.50269 | 3.377104  | 2.23E-29 | 1.207119  | 1.37E-45 | -0.06296  | 0.950309 |
| AT1G25410 | IP76      | 0        | 0        | 0        | 0        | 0        | 0        | 0        | 0        | 0        | 0        | 0        | 0        | 0         | NA       | 0         | NA       | 0.172362  | NA       |
| AT1G25420 | AT1G25420 | 222.325  | 272.9896 | 284.5716 | 304.3627 | 325.2714 | 308.0238 | 332.5995 | 301.0103 | 317.2799 | 349.271  | 275.3791 | 338.7414 | 0.265526  | 0.107426 | 0.28675   | 0.096432 | 0.309302  | 0.201501 |
| AT1G25422 | AT1G25422 | 1.188904 | 0        | 0        | 0.824831 | 1.324935 | 0.996841 | 1.778607 | 2.15778  | 5.857476 | 1.919071 | 0        | 2.071813 | 0.209574  | 0.428400 | 1.03505   | 0.122036 | 0.400565  | NA       |
| AT1G25425 | CLE43     | 24.96698 | 19.62671 | 21.89012 | 29.28151 | 30.47349 | 24.92102 | 28.41447 | 38.07359 | 36.46235 | 42.57069 | 47.6517  | 47.6517  | -0.311086 | 0.449091 | 0.30533   | 0.472369 | 0.840092  | 0.076171 |
| AT1G25430 | AT1G25430 | 175.9578 | 224.815  | 148.0802 | 45.77813 | 41.07297 | 35.86627 | 47.13308 | 58.26006 | 22.45366 | 174.6355 | 162.3007 | 154.3501 | -2.03597  | 1.15E-16 | -1.99359  | 4.7E-15  | -0.14407  | 0.788523 |
| AT1G25440 | COL16     | 4010.173 | 4640.824 | 4020.057 | 2825.872 | 2763.151 | 2691.47  | 2411.791 | 2614.15  | 2943.382 | 3655.831 | 3815.398 | 3734.443 | -0.60754  | 1.3E-08  | -0.6628   | 5.37E-10 | -0.17515  | 0.33979  |
| AT1G25450 | KCS5      | 140.2907 | 199.8356 | 180.2716 | 201.2588 | 211.3271 | 242.2323 | 178.75   | 187.7268 | 222.5841 | 212.0574 | 239.4601 | 178.1759 | 0.327423  | 0.106798 | 0.183842  | 0.435753 | -0.274084 | 0.406936 |
| AT1G25460 | AT1G25460 | 2.377808 | 12.48972 | 7.725926 | 19.79595 | 18.54908 | 25.91786 | 7.114428 | 11.86779 | 10.73871 | 7.676285 | 5.321336 | 8.287252 | 1.332341  | 0.004957 | 0.355407  | 0.570278 | 0.002909  | NA       |
| AT1G25470 | ERF116    | 0        | 0        | 0        | 0        | 0        | 0        | 0.889303 | 0        | 0        | 0        | 0        | 0        | #N/A      | #N/A     | #N/A      | #N/A     | #N/A      | #N/A     |
| AT1G25472 | CPuORF54  | 0        | 0        | 0        | 0        | 0        | 0        | 0        | 0        | 0        | 0        | 0        | 0        | #N/A      | #N/A     | #N/A      | #N/A     | #N/A      | #N/A     |
| AT1G25480 | ALMT4     | 129.5905 | 203.404  | 148.0802 | 211.1568 | 220.6016 | 214.3208 | 240.1119 | 225.488  | 193.2967 | 192.8667 | 211.5231 | 172.9964 | 0.433033  | 0.023862 | 0.461647  | 0.020077 | 0.271272  | 0.404134 |
| AT1G25490 | PPZA1     | 835.7995 | 829.6744 | 827.9617 | 665.6387 | 549.8478 | 719.719  | 692.7674 | 659.2018 | 470.5506 | 686.068  | 639.8906 | 656.7647 | -0.36042  | 0.035235 | -0.44381  | 0.010122 | -0.32412  | 0.205576 |
| AT1G25500 | AT1G25500 | 68.95643 | 48.17464 | 65.67037 | 113.0019 | 109.9696 | 120.6177 | 117.3881 | 124.0723 | 134.7219 | 60.45074 | 61.19536 | 54.90305 | 0.856203  | 0.000035 | 0.986268  | 2.47E-06 | -0.07458  | 0.893141 |
| AT1G25510 | AT1G25510 | 28.53369 | 33.90663 | 30.9037  | 21.85803 | 16.56168 | 16.94629 | 15.11816 | 16.9246  | 25.90746 | 27.93701 | 30.04129 | 30.04129 | -1.12421  | 0.002811 | -0.13126  | 0.869331 | -0.13126  | 0.869331 |
| AT1G25520 | AT1G25520 | 104.6235 | 155.2294 | 126.1901 | 296.1144 | 292.1481 | 228.2765 | 250.7836 | 213.6202 | 263.5864 | 131.4564 | 95.78405 | 159.5296 | 1.064755  | 3.48E-07 | 0.898844  | 3.25E-05 | 0.02      |          |

|           |           |          |          |           |          |          |          |          |          |          |          |          |          |          |           |          |          |          |          |
|-----------|-----------|----------|----------|-----------|----------|----------|----------|----------|----------|----------|----------|----------|----------|----------|-----------|----------|----------|----------|----------|
| AT1G26480 | GRF12     | 0        | 1.784246 | 0         | 0.412416 | 3.974804 | 0        | 0        | 1.07889  | 0.976246 | 1.919071 | 1.330334 | 1.035907 | 0.412928 | 0.542788  | 0.04504  | 0.955373 | 0.371078 | NA       |
| AT1G26490 | AT1G26490 | 0        | 0        | 0         | 0        | 0        | 0        | 0        | 0        | 0        | 0        | 0        | 0        | #N/A     | #N/A      | #N/A     | #N/A     | #N/A     | #N/A     |
| AT1G26500 | AT1G26500 | 10.70014 | 17.84246 | 19.31482  | 12.78488 | 9.274542 | 17.94313 | 10.67164 | 18.34113 | 11.71495 | 17.27164 | 7.982004 | 11.39497 | -0.23136 | 0.670631  | -0.19249 | 0.750364 | -0.28491 | NA       |
| AT1G26510 | AT1G26510 | 2.377808 | 0        | 0         | 0.824831 | 0.662467 | 0        | 0        | 3.23667  | 1.952492 | 1.919071 | 2.660668 | 2.071813 | -0.23846 | 0.754032  | 0.322527 | 0.675442 | 0.496515 | NA       |
| AT1G26515 | AT1G26515 | 0        | 0        | 0         | 0.412416 | 0        | 0        | 0        | 0        | 0.976246 | 0        | 0        | 0        | 0.065752 | NA        | 0.143461 | NA       | 0        | 0        |
| AT1G26520 | AT1G26520 | 58.25629 | 69.5856  | 64.38272  | 83.30795 | 84.13334 | 76.75674 | 73.81219 | 78.75897 | 47.83605 | 52.77446 | 67.84703 | 63.1903  | 0.345573 | 0.192066  | 0.063755 | 0.857584 | -0.06185 | 0.923603 |
| AT1G26530 | AT1G26530 | 8.322328 | 3.568492 | 7.725926  | 6.598649 | 8.612075 | 4.984204 | 3.557214 | 9.710009 | 5.857476 | 3.888143 | 9.312338 | 10.35907 | 0.009361 | 0.990376  | -0.08167 | 0.916783 | 0.14507  | NA       |
| AT1G26540 | AT1G26540 | 59.4452  | 32.11643 | 57.94445  | 23.50769 | 19.87402 | 11.96209 | 26.6791  | 21.5778  | 18.54867 | 43.1791  | 73.16837 | 48.68761 | -1.28851 | 0.000125  | -1.07792 | 0.002497 | 0.10167  | 0.897429 |
| AT1G26550 | AT1G26550 | 851.2552 | 884.986  | 1052.014  | 1951.963 | 1887.369 | 1425.482 | 1058.271 | 1186.779 | 1547.35  | 1191.743 | 1269.139 | 973.7521 | 0.89612  | 8.66607   | 0.432446 | 0.032183 | 0.29248  | 0.349972 |
| AT1G26558 | AT1G26558 | 3.566712 | 0        | 5.15067   | 4.536571 | 3.312336 | 1.993682 | 4.446517 | 3.23667  | 3.904984 | 6.716749 | 13.30334 | 5.179533 | 0.047007 | 0.954608  | 0.170768 | 0.838161 | 0.947207 | NA       |
| AT1G26560 | BGLU40    | 360.2379 | 351.4965 | 296.1605  | 237.139  | 227.2263 | 198.3713 | 171.6356 | 149.9657 | 176.7005 | 383.8143 | 476.2596 | 377.07   | -0.58582 | 0.00026   | -0.99333 | 6.91E-10 | 0.288692 | 0.259067 |
| AT1G26570 | UGD1      | 78.46766 | 96.34929 | 84.98519  | 70.52306 | 72.8714  | 87.72199 | 63.14055 | 79.83786 | 69.31347 | 74.84378 | 74.4987  | 99.44703 | -0.1677  | 0.528506  | -0.27573 | 0.310801 | -0.04659 | 0.937362 |
| AT1G26580 | AT1G26580 | 1734.611 | 1871.674 | 1667.512  | 1558.931 | 1619.732 | 1785.342 | 1892.438 | 1930.134 | 1758.219 | 1975.684 | 1847.834 | 1799.37  | -0.08723 | 0.4896    | 0.08224  | 0.538578 | 0.093408 | 0.652681 |
| AT1G26590 | AT1G26590 | 3.566712 | 1.784246 | 2.575309  | 4.124156 | 5.962205 | 2.990522 | 4.446517 | 2.15778  | 2.928738 | 0.995936 | 3.991002 | 3.10772  | 0.45382  | 0.525376  | 0.132735 | 0.878966 | -0.0479  | NA       |
| AT1G26600 | CLE9      | 7.133424 | 3.568492 | 5.150617  | 9.897974 | 9.274542 | 2.990522 | 8.003731 | 6.47334  | 12.6912  | 6.716749 | 9.312338 | 8.287252 | 0.369283 | 0.562776  | 0.544088 | 0.400542 | 0.402336 | NA       |
| AT1G26610 | AT1G26610 | 9.511232 | 17.36984 | 3.862963  | 1.649662 | 3.974804 | 2.990522 | 3.557214 | 5.39445  | 3.904984 | 4.797678 | 5.321336 | 4.143626 | -0.91779 | 0.134596  | -0.48553 | 0.492263 | -0.37976 | NA       |
| AT1G26620 | AT1G26620 | 189.0357 | 183.7773 | 160.9568  | 135.2723 | 116.5942 | 155.5072 | 128.949  | 161.8335 | 84.9334  | 37.2136  | 123.7211 | 152.2783 | -0.38075 | 0.115333  | -0.49078 | 0.047473 | -0.35249 | 0.354676 |
| AT1G26630 | ELF5A-2   | 3792.604 | 3791.523 | 3735.9485 | 4322.115 | 4922.794 | 3463.025 | 2199.026 | 2764.116 | 4322.817 | 3864.05  | 4073.483 | 3648.463 | 0.163527 | 0.44927   | -0.1743  | 0.438624 | 0.032714 | 0.947019 |
| AT1G26640 | AT1G26640 | 257.9922 | 230.1677 | 262.6815  | 420.6639 | 504.8001 | 362.85   | 316.592  | 242.7502 | 369.9972 | 294.5774 | 385.7969 | 281.7666 | 0.756994 | 0.000142  | 0.297047 | 0.205502 | 0.340423 | 0.306881 |
| AT1G26650 | AT1G26650 | 343.5932 | 322.9485 | 332.2148  | 198.3719 | 218.6142 | 205.3492 | 183.1965 | 172.6224 | 231.3703 | 336.797  | 327.2622 | 336.6696 | -0.76760 | 2.4E-06   | -0.75529 | 3.05E-07 | 0.002016 | 0.996198 |
| AT1G26660 | AT1G26660 | 24.96698 | 30.33218 | 34.76667  | 77.94654 | 60.94699 | 69.77889 | 59.58333 | 57.18117 | 67.36097 | 25.90746 | 34.58868 | 43.50807 | 1.154004 | 0.359E-05 | 0.972114 | 0.001033 | 0.18626  | 0.789505 |
| AT1G26665 | MED10B    | 158.1242 | 99.91778 | 158.3815  | 340.2428 | 418.6793 | 49.7268  | 558.4826 | 502.7627 | 680.4435 | 200.5429 | 196.8894 | 165.745  | 1.417527 | 3.95E-14  | 1.993288 | 2.65E-24 | 0.401877 | 0.208546 |
| AT1G26670 | VTI12     | 1029.591 | 1273.952 | 1263.189  | 1327.153 | 1258.688 | 1242.064 | 1177.438 | 1192.173 | 1497.561 | 1317.442 | 1483.322 | 1118.779 | 0.10212  | 0.587878  | 0.116109 | 0.552834 | 0.134215 | 0.656746 |
| AT1G26680 | REM17     | 5.94452  | 0        | 0         | 1.237247 | 1.324935 | 3.987363 | 2.66791  | 2.15778  | 0.976246 | 4.797678 | 5.321336 | 6.215439 | -0.09145 | 0.9145    | -0.09422 | 0.915478 | 0.771398 | NA       |
| AT1G26690 | AT1G26690 | 170.0133 | 130.25   | 139.0667  | 294.0523 | 292.8105 | 250.207  | 178.75   | 158.5968 | 255.7765 | 192.8667 | 218.1748 | 157.4578 | 0.897864 | 1.79E-05  | 0.412117 | 0.086337 | 0.492439 | 0.334593 |
| AT1G26700 | MLO14     | 1.188904 | 0        | 0         | 0        | 0.662467 | 0.996841 | 0        | 0        | 0        | 0        | 1.330334 | 0        | 0.057614 | NA        | -0.24354 | NA       | -0.01082 | NA       |
| AT1G26710 | AT1G26710 | 2.377808 | 0        | 1.287564  | 0        | 0        | 0        | 0        | 0        | 4.797678 | 1.330334 | 5.179533 | 0        | -0.84676 | 0.173113  | -0.7196  | 0.266301 | 0.494223 | NA       |
| AT1G26720 | AT1G26720 | 4.755616 | 1.784246 | 1.287564  | 0        | 0        | 0        | 0        | 0        | 0.767285 | 1.330334 | 5.179533 | 0        | -1.33969 | 0.032074  | -1.18153 | 0.066951 | 0.585849 | NA       |
| AT1G26730 | PHO1-H7   | 68.95643 | 89.2123  | 106.8753  | 75.05963 | 88.10815 | 99.68408 | 107.6057 | 92.78453 | 76.14719 | 92.11542 | 73.16837 | 95.3034  | -0.02189 | 0.984815  | 0.064896 | 0.848998 | -0.01249 | 0.986682 |
| AT1G26740 | AT1G26740 | 49.93397 | 35.68492 | 38.62963  | 105.166  | 105.9948 | 67.78517 | 90.70896 | 66.89118 | 105.4346 | 50.85539 | 54.54369 | 68.36983 | 1.100774 | 6.75E-05  | 0.006136 | 0.000465 | 0.434932 | 0.380705 |
| AT1G26750 | AT1G26750 | 118.8904 | 94.56504 | 109.4506  | 167.0283 | 146.4053 | 136.5672 | 100.4913 | 106.8101 | 123.007  | 129.5373 | 105.0964 | 110.842  | 0.466739 | 0.019168  | 0.019659 | 0.946399 | 0.089659 | 0.849275 |
| AT1G26760 | ATRX1     | 17.83356 | 14.27397 | 18.02716  | 18.14629 | 29.14856 | 12.95893 | 11.56905 | 17.26224 | 31.3703  | 336.797  | 327.2622 | 336.6696 | 0.227238 | 0.683228  | 0.206099 | 0.734392 | 0.015349 | 0.990423 |
| AT1G26761 | AT1G26761 | 342.4043 | 308.6746 | 296.1605  | 164.1414 | 137.7932 | 150.523  | 122.7239 | 117.599  | 137.5057 | 79.2249  | 264.7365 | 358.4327 | -1.0423  | 1.6E-10   | -1.29777 | 1.21E-14 | -0.06715 | 0.866033 |
| AT1G26762 | AT1G26762 | 2.377808 | 3.568492 | 1.287564  | 19.18353 | 19.87402 | 9.968408 | 10.67314 | 6.47334  | 10.73871 | 3.888143 | 7.982004 | 5.179533 | 2.006527 | 0.000156  | 1.26738  | 0.032223 | 0.541768 | NA       |
| AT1G26770 | EXPA10    | 168.8244 | 212.3253 | 190.5728  | 251.9859 | 229.2137 | 232.2639 | 160.0746 | 194.2002 | 223.5603 | 224.5313 | 170.2827 | 224.7917 | 0.322348 | 0.100113  | 0.020011 | 0.941819 | 0.126629 | 0.745931 |
| AT1G26771 | AT1G26771 | 0        | 0        | 0         | 0        | 0        | 0        | 0        | 0        | 0        | 0        | 0        | 0        | #N/A     | #N/A      | #N/A     | #N/A     | #N/A     | #N/A     |
| AT1G26773 | AT1G26773 | 0        | 0        | 0         | 0        | 0        | 0        | 0        | 0        | 0        | 0        | 0        | 0        | #N/A     | #N/A      | #N/A     | #N/A     | #N/A     | #N/A     |
| AT1G26780 | MYB117    | 7.133424 | 10.70548 | 9.01358   | 6.598649 | 6.624673 | 3.987363 | 5.335821 | 9.710009 | 1.952492 | 5.757214 | 11.97301 | 13.46678 | -0.44639 | 0.469014  | -0.49166 | 0.455215 | 0.183428 | NA       |
| AT1G26790 | DOF1.3    | 1.188904 | 0        | 1.287564  | 0.412416 | 0        | 0        | 0        | 0        | 2.878607 | 2.660668 | 0        | 0        | -0.42903 | NA        | -0.48878 | NA       | 0.402113 | NA       |
| AT1G26795 | AT1G26795 | 0        | 0        | 0         | 0        | 0        | 0        | 0.889303 | 0        | 0        | 0        | 0        | 0        | 0        | NA        | 0.160764 | NA       | 0        | NA       |
| AT1G26796 | AT1G26796 | 0        | 0        | 0         | 0        | 0        | 0        | 0.889303 | 0        | 0        | 0        | 0        | 0        | 0        | NA        | 0.160764 | NA       | 0        | NA       |
| AT1G26797 | AT1G26797 | 0        | 0        | 0         | 0        | 0        | 0        | 0        | 0        | 0        | 0        | 0        | 0        | #N/A     | #N/A      | #N/A     | #N/A     | #N/A     | #N/A     |
| AT1G26798 | AT1G26798 | 0        | 0        | 0         | 0        | 0.662467 | 0        | 0        | 0        | 0        | 0        | 0        | 0        | 0.128567 | NA        | 0        | NA       | 0        | NA       |
| AT1G26799 | AT1G26799 | 0        | 0        | 0         | 0        | 0        | 0        | 0        | 0        | 0        | 0        | 0        | 0        | #N/A     | #N/A      | #N/A     | #N/A     | #N/A     | #N/A     |
| AT1G26800 | AT1G26800 | 174.7689 | 226.5992 | 231.7778  | 216.1058 | 259.2427 | 252.2007 | 244.5585 | 245.9869 | 429.5482 | 182.3118 | 167.6221 | 227.8994 | 0.192961 | 0.493904  | 0.522222 | 0.040919 | -0.12152 | 0.821152 |
| AT1G26810 | B3GAL11   | 108.1903 | 98.13353 | 88.84815  | 45.77813 | 47.69764 | 59.81045 | 57.80473 | 46.39227 | 46.85981 | 97.87263 | 82.48071 | 84.94434 | -0.93841 | 1.84E-05  | -0.92721 | 6.45E-05 | -0.14489 | 0.757199 |
| AT1G26815 | AT1G26815 | 0        | 0        | 0         | 0        | 0        | 0        | 0        | 0        | 0        | 0        | 0        | 0        | #N/A     | #N/A      | #N/A     | #N/A     | #N/A     | #N/A     |
| AT1G26820 | RNS3      | 20.1137  | 21.41095 | 36.05432  | 36.70499 | 33.12336 | 28.90388 | 26.6791  | 18.34113 | 26.35864 | 63.32935 | 42.57069 | 35.22082 | 0.318718 | 0.42514   | -0.1164  | 0.816362 | 0.790877 | 0.116762 |
| AT1G26830 | CUL3A     | 714.5313 | 592.3697 | 677.3062  | 571.608  | 538.5859 | 612.0602 | 575.3794 | 633.3084 | 592.5813 | 506.6348 | 474.9292 | 530.3841 | -0.20873 | 0.114758  | -0.14332 | 0.332522 | -0.39077 | 0.016482 |
| AT1G26840 | ORC6      | 22.58917 | 21.41095 | 38.62963  | 37.52982 | 39.08557 | 41.86731 | 19.56468 | 14.02557 | 17.57243 | 42.21957 | 31.92802 | 38.32854 | 0.467167 | 0.171765  | -0.63341 | 1.0315   | 0.40878  | 0.484870 |
| AT1G26850 | AT1G26850 | 2160.238 | 1739.64  | 1829.757  | 1248.382 | 1238.814 | 1434.454 | 1213.01  | 1442.476 | 1167.529 | 1660.956 | 1664.248 | 1624.301 | -0.54339 | 3.13E-05  | -0.57873 | 1.07E-05 | -0.21004 | 0.338107 |
| AT1G26860 | AT1G26860 | 0        | 0        | 0         | 0        | 0        | 0        | 0.889303 | 0        | 0        | 0        | 0        | 0        | 0        | NA        | 0.160764 | NA       | 0        | NA       |
| AT1G26870 | FEZ       | 0        | 0        | 0         | 0        | 0        | 0        | 0        | 0        | 0.976246 | 0        | 0        | 0        | 0        | NA        | 0.16673  | NA       | 0        | NA       |
| AT1G26880 | RPL34A    | 607.5299 | 685.1505 | 750.7025  | 956.3917 | 853.9203 | 781.5232 | 473.1095 | 483.3427 | 798.5692 | 687.987  | 522.8213 | 708.5601 | 0.334453 | 0.144726  | -0.21243 | 0.411063 | -0.08569 | 0.863358 |
| AT1G26890 | AT1G26890 | 3.566712 | 3.568    |           |          |          |          |          |          |          |          |          |          |          |           |          |          |          |          |



|           |             |          |          |          |          |          |          |          |          |          |          |            |           |          |          |           |          |           |          |
|-----------|-------------|----------|----------|----------|----------|----------|----------|----------|----------|----------|----------|------------|-----------|----------|----------|-----------|----------|-----------|----------|
| AT1G27300 | AT1G27300   | 159.3131 | 181.9931 | 160.9568 | 320.4469 | 361.0447 | 270.1439 | 358.3893 | 327.9825 | 510.5767 | 241.803  | 196.8894   | 168.8528  | 0.898985 | 1.91E-05 | 1.217952  | 3.6E-09  | 0.269796  | 0.494394 |
| AT1G27310 | NTF2A       | 378.0715 | 440.7088 | 463.5556 | 662.3394 | 535.936  | 454.5594 | 456.2127 | 456.3704 | 724.3745 | 479.7678 | 371.1632   | 323.1328  | 0.358089 | 0.13405  | 0.341434  | 0.176013 | 0.09005   | 0.848479 |
| AT1G27320 | AHK3        | 1249.538 | 1059.842 | 921.9605 | 676.774  | 649.2179 | 802.4568 | 928.4328 | 1042.208 | 680.4435 | 978.7263 | 967.1528   | 868.0897  | -0.59153 | 0.000171 | -0.28016  | 0.173282 | -0.19579  | 0.559649 |
| AT1G27330 | AT1G27330   | 85.60108 | 85.64381 | 103.0123 | 626.0468 | 845.3082 | 441.6005 | 498.0099 | 264.328  | 791.7355 | 84.43914 | 66.5167    | 166.781   | 2.380235 | 1.73E-08 | 2.118611  | 7.4E-07  | 0.172359  | 0.868534 |
| AT1G27340 | FBK6        | 350.7267 | 419.2978 | 370.8445 | 397.981  | 418.6793 | 380.7932 | 357.5    | 367.9015 | 373.9022 | 371.3403 | 415.0642   | 282.8025  | 0.074494 | 0.709605 | -0.04836  | 0.829653 | -0.09132  | 0.792184 |
| AT1G27350 | AT1G27350   | 112.9459 | 99.91778 | 135.2037 | 393.4445 | 433.2536 | 272.1375 | 261.4552 | 201.7524 | 210.7524 | 183.5641 | 183.5861   | 183.5861  | 1.559125 | 1.98E-08 | 1.35351   | 0.295637 | -0.492038 | 0.303504 |
| AT1G27360 | SP11        | 84.41218 | 114.1917 | 93.99877 | 99.39215 | 95.39529 | 77.75358 | 136.9527 | 117.599  | 123.007  | 127.6182 | 110.4177   | 111.8779  | -0.06959 | 0.793142 | 0.37572   | 0.095729 | 0.269854  | 0.458722 |
| AT1G27370 | SP10        | 136.724  | 199.8356 | 158.3815 | 159.1924 | 193.4404 | 141.5514 | 167.1891 | 148.8868 | 123.9832 | 178.4736 | 194.2288   | 168.8528  | 0.014816 | 0.958549 | -0.15093  | 0.560215 | 0.136548  | 0.748154 |
| AT1G27380 | RIC2        | 3.566712 | 0        | 3.862963 | 1.649662 | 2.649869 | 2.990522 | 3.358211 | 3.23667  | 3.904984 | 6.716749 | 7.982004   | 10.35907  | -0.19474 | 0.802768 | 0.377026  | 0.623679 | 1.119878  | NA       |
| AT1G27385 | AT1G27385   | 310.3039 | 479.9622 | 455.8296 | 387.2582 | 397.4804 | 355.872  | 430.4229 | 376.5326 | 406.1183 | 453.8604 | 399.1002   | 422.6499  | -0.1169  | 0.567565 | -0.0307   | 0.899876 | 0.041059  | 0.924386 |
| AT1G27390 | TOM20-2     | 306.7372 | 248.0102 | 297.4482 | 466.2337 | 483.6011 | 431.6321 | 380.6219 | 316.1148 | 425.6433 | 245.6411 | 299.3251   | 273.4793  | 0.658964 | 2.55E-05 | 0.385014  | 0.025872 | -0.06793  | 0.86061  |
| AT1G27400 | RPL17A      | 782.2988 | 715.4827 | 836.9753 | 1008.356 | 992.376  | 834.3557 | 653.6381 | 624.6773 | 1034.821 | 767.6285 | 783.5667   | 965.4649  | 0.272992 | 0.212531 | -0.01395  | 0.961962 | 0.10464   | 0.81058  |
| AT1G27410 | Z27420/F17L | 99.86793 | 76.72258 | 91.42346 | 62.68717 | 79.49607 | 66.78833 | 62.25124 | 72.28563 | 48.8123  | 64.28889 | 71.83803   | 83.90843  | -0.35985 | 0.152977 | -0.54028  | 0.036976 | -0.28512  | 0.510071 |
| AT1G27420 | AT1G27420   | 29.7226  | 26.76369 | 27.04074 | 33.40566 | 28.48609 | 47.84836 | 28.45771 | 30.20892 | 29.28738 | 34.54328 | 23.94601   | 31.0772   | 0.335243 | 0.305773 | 0.061078  | 0.898075 | 0.100838  | 0.900371 |
| AT1G27430 | AT1G27430   | 545.7069 | 469.2567 | 392.7346 | 284.9792 | 251.0751 | 349.8911 | 388.6256 | 480.106  | 276.2776 | 382.8547 | 373.8238   | 392.6086  | -0.65263 | 0.002709 | -0.29065  | 0.233502 | -0.28402  | 0.441389 |
| AT1G27435 | AT1G27435   | 116.5126 | 115.976  | 137.779  | 165.3786 | 158.3297 | 124.6051 | 88.04104 | 89.54786 | 213.7979 | 135.2945 | 137.0244   | 139.8744  | 0.262977 | 0.442828 | 0.073581  | 0.860316 | 0.143592  | 0.831384 |
| AT1G27440 | IRX10       | 70.14533 | 58.88012 | 54.08148 | 50.72712 | 45.71024 | 41.86731 | 45.35448 | 47.47116 | 38.07359 | 50.85539 | 38.57969   | 31.0772   | -0.37569 | 0.192606 | -0.4655   | 0.127176 | -0.56936  | 0.179491 |
| AT1G27450 | APT1        | 871.4666 | 1088.042 | 1086.78  | 1770.088 | 1836.359 | 1736.497 | 1402.432 | 1474.843 | 2004.233 | 1219.57  | 1294.415   | 1099.097  | 0.811062 | 1.63E-07 | 0.682689  | 1.67E-05 | 0.255503  | 0.336402 |
| AT1G27460 | NPGR1       | 374.5047 | 342.5752 | 327.0642 | 139.3965 | 151.0425 | 217.3113 | 192.9789 | 213.6202 | 156.1994 | 216.8551 | 219.5051   | 311.8079  | -1.02166 | 0.90E-07 | -0.86518  | 5.69E-05 | -0.46516  | 0.148193 |
| AT1G27461 | AT1G27461   | 0        | 0        | 0        | 0        | 0        | 0        | 0.889303 | 0        | 0        | 0        | 0          | 0         | 0        | NA       | 0         | NA       | 0         | NA       |
| AT1G27470 | AT1G27470   | 172.3911 | 112.4075 | 144.2173 | 113.4143 | 89.43308 | 151.5198 | 130.7276 | 117.599  | 86.88589 | 146.809  | 115.7391   | 110.842   | -0.28418 | 0.311895 | -0.34906  | 0.230984 | -0.19801  | 0.694983 |
| AT1G27480 | LCAT1       | 234.2141 | 255.1472 | 226.6272 | 224.3541 | 198.7402 | 213.3239 | 345.0498 | 379.7693 | 358.2823 | 274.4272 | 243.4511   | 254.833   | -0.16032 | 0.322904 | 0.593601  | 2.09E-05 | 0.116471  | 0.687982 |
| AT1G27490 | AT1G27490   | 0        | 0        | 0        | 0        | 0.662467 | 0        | 0        | 0        | 0        | 0        | 0          | 0         | 0.128567 | NA       | 0         | NA       | 0         | NA       |
| AT1G27500 | AT1G27500   | 78.46766 | 69.5856  | 74.68395 | 49.90228 | 51.67245 | 60.80729 | 59.58333 | 63.65451 | 66.38473 | 47.97678 | 54.54369   | 58.01077  | -0.46303 | 0.052043 | -0.23061  | 0.413528 | -0.46349  | 0.212111 |
| AT1G27510 | EX2         | 551.6514 | 590.5854 | 582.0198 | 489.5373 | 476.314  | 568.1992 | 674.9813 | 722.8563 | 681.8426 | 665.9177 | 578.6953   | 625.6875  | -0.16962 | 0.265979 | 0.197623  | 0.207047 | 0.118917  | 0.655184 |
| AT1G27520 | MNS5        | 326.9486 | 347.928  | 352.8173 | 319.6221 | 243.788  | 330.9511 | 346.8284 | 329.0614 | 263.5864 | 308.9705 | 348.5475   | 394.6804  | -0.19694 | 0.323726 | -0.12552  | 0.578214 | 0.033668  | 0.942704 |
| AT1G27530 | AT1G27530   | 266.3145 | 360.4177 | 418.4887 | 632.2331 | 564.4221 | 452.5657 | 427.755  | 398.1104 | 503.7429 | 456.739  | 431.0282   | 398.824   | 0.647825 | 0.00073  | 0.340706  | 0.115222 | 0.294253  | 0.366212 |
| AT1G27540 | AT1G27540   | 193.7913 | 206.9725 | 209.8877 | 188.8863 | 190.7906 | 209.3366 | 188.5323 | 221.1724 | 175.7243 | 185.1904 | 168.9524   | 184.3914  | -0.05487 | 0.787933 | -0.06061  | 0.783991 | -0.17307  | 0.566275 |
| AT1G27550 | AT1G27550   | 0        | 0        | 0        | 0        | 0        | 0        | 0        | 0        | 0        | 0        | 0          | 0         | 0        | NA       | 0         | NA       | 0         | NA       |
| AT1G27560 | AT1G27560   | 5.94452  | 3.568492 | 7.725926 | 2.062078 | 1.987402 | 5.981045 | 3.557214 | 5.39445  | 4.88123  | 3.838143 | 1.330334   | 2.071813  | -0.62902 | 0.343358 | -0.23706  | 0.766629 | -0.7749   | NA       |
| AT1G27565 | AT1G27565   | 7.133424 | 3.568492 | 12.87654 | 8.248311 | 15.23675 | 11.96209 | 16.89677 | 5.39445  | 21.47741 | 12.47396 | 13.30334   | 6.215439  | 0.396036 | 0.512546 | 0.669947  | 0.2591   | 0.284231  | NA       |
| AT1G27570 | AT1G27570   | 0        | 0        | 0        | 0.412416 | 0        | 0        | 0        | 0        | 0        | 0        | 0          | 0         | 0.095918 | NA       | 0         | NA       | 0         | NA       |
| AT1G27580 | AT1G27580   | 134.3461 | 155.2294 | 124.9025 | 131.5606 | 129.8436 | 127.956  | 126.2811 | 127.309  | 102.5058 | 118.9824 | 117.0694   | 109.8061  | -0.07765 | 0.733302 | -0.20477  | 0.35236  | -0.24582  | 0.453486 |
| AT1G27590 | AT1G27590   | 130.7794 | 108.3839 | 118.4642 | 68.46099 | 64.92179 | 92.70619 | 104.9378 | 80.91675 | 62.4974  | 98.8317  | 73.16837   | 95.3034   | -0.65961 | 0.006782 | -0.50814  | 0.054429 | -0.40211  | 0.311054 |
| AT1G27595 | AT1G27595   | 349.5378 | 280.1266 | 305.1741 | 185.1746 | 196.0903 | 257.1849 | 312.1455 | 316.1148 | 192.3205 | 267.7104 | 260.7455   | 236.1867  | -0.54508 | 0.011806 | -0.18569  | 0.478689 | -0.28445  | 0.44468  |
| AT1G27600 | IRX9H       | 218.7583 | 287.2636 | 231.7778 | 251.9859 | 231.2011 | 256.1881 | 260.5659 | 286.9847 | 291.8976 | 250.4388 | 258.0848   | 284.8743  | 0.013257 | 0.951099 | 0.193543  | 0.2848   | 0.114763  | 0.71857  |
| AT1G27610 | AT1G27610   | 0        | 0        | 1.287654 | 0        | 0        | 0        | 0        | 0        | 0        | 0        | 0          | 0         | -0.2184  | NA       | -0.20558  | NA       | -0.19918  | NA       |
| AT1G27620 | AT1G27620   | 2.377808 | 1.784246 | 2.575309 | 2.886909 | 3.312336 | 0.996841 | 0        | 2.15778  | 0        | 0        | 0          | 0.1579533 | 0.092605 | 0.912123 | -0.56359  | 0.441795 | -0.14213  | NA       |
| AT1G27630 | CYCT3-1     | 192.6024 | 228.3835 | 200.8741 | 293.6399 | 304.0725 | 330.9511 | 441.9838 | 372.217  | 350.4723 | 216.8551 | 270.0578   | 260.0125  | 0.570532 | 0.000407 | 0.897587  | 1.01E-08 | 0.261375  | 0.345021 |
| AT1G27640 | AT1G27640   | 0        | 0        | 0        | 0.824831 | 1.324935 | 1.993682 | 2.66791  | 0        | 0.976246 | 1.919071 | 1.330334   | 0         | 0.630341 | 0.318317 | 0.585012  | 0.373994 | 0.504089  | NA       |
| AT1G27650 | UZAF35A     | 595.6409 | 579.88   | 575.5815 | 75.7195  | 805.5602 | 688.817  | 547.8109 | 590.1528 | 809.3079 | 546.9353 | 457.6349   | 494.1274  | 0.357311 | 0.036517 | 0.149947  | 0.460896 | -0.21888  | 0.454462 |
| AT1G27660 | BHLH10      | 90.3567  | 73.15409 | 84.98519 | 49.07745 | 51.00998 | 41.86731 | 70.25498 | 47.47116 | 41.00233 | 112.2657 | 85.14137   | 91.15977  | -0.77121 | 0.002194 | -0.61799  | 0.023173 | 0.206654  | 0.670992 |
| AT1G27670 | AT1G27670   | 1.188904 | 3.568492 | 2.575309 | 2.062078 | 2.649869 | 0.996841 | 3.557214 | 4.31556  | 2.928738 | 0        | 1.330334   | 1.035907  | -0.12462 | 0.881506 | 0.38887   | 0.626419 | -0.63889  | NA       |
| AT1G27671 | AT1G27671   | 0        | 0        | 0        | 0        | 0        | 0        | 0        | 0        | 0        | 0        | 0          | 0         | 0        | NA       | 0         | NA       | 0.172362  | NA       |
| AT1G27680 | APL2        | 172.3911 | 158.7979 | 195.7235 | 194.6602 | 194.1029 | 173.4503 | 172.5429 | 170.4646 | 161.8066 | 209.1788 | 234.1388   | 185.4273  | 0.091578 | 0.65322  | -0.06892  | 0.765307 | 0.239343  | 0.403703 |
| AT1G27690 | AT1G27690   | 114.1348 | 94.56504 | 121.0395 | 142.6958 | 148.3927 | 128.5925 | 143.1779 | 148.8868 | 131.7932 | 105.5489 | 110.4177   | 98.41112  | 0.334678 | 0.082488 | -0.341315 | 0.096346 | -0.08237  | 0.853499 |
| AT1G27695 | AT1G27695   | 43.98945 | 42.8219  | 48.93086 | 74.67222 | 66.90919 | 57.81677 | 34.68284 | 38.84004 | 80.05217 | 85.39867 | 37.24935   | 45.57989  | 0.511171 | 0.179765 | 0.157124  | 0.743838 | 0.290609  | 0.680149 |
| AT1G27700 | AT1G27700   | 93.92341 | 73.15409 | 88.84815 | 94.85558 | 116.5942 | 93.70303 | 132.5062 | 98.17898 | 136.6744 | 97.87263 | 123.7211   | 99.44703  | 0.233085 | 0.354339 | 0.496063  | 0.037268 | 0.295537  | 0.456762 |
| AT1G27710 | AT1G27710   | 14.26685 | 58.88012 | 25.75309 | 5.361402 | 7.28714  | 0.996841 | 0        | 1.07889  | 1.952492 | 104.5894 | 19.95501   | 9.323159  | -1.44922 | 0.032348 | -1.94603  | 0.002    | 0.300984  | 0.8307   |
| AT1G27720 | TAF4        | 4.755616 | 8.92123  | 2.575309 | 15.67179 | 13.91181 | 20.93366 | 17.78607 | 18.34113 | 9.76246  | 10.55489 | 5.321336   | 7.251346  | 1.324487 | 0.00752  | 1.2094    | 0.021324 | 0.413820  | NA       |
| AT1G27730 | ZAT10       | 19.02246 | 30.33128 | 42.49529 | 35.50888 | 290.8231 | 632.9939 | 768.3582 | 813.483  | 867.8827 | 24.94793 | 13.30334</ |           |          |          |           |          |           |          |

|           |           |          |          |          |          |          |          |          |          |          |          |          |          |           |          |          |          |          |           |    |
|-----------|-----------|----------|----------|----------|----------|----------|----------|----------|----------|----------|----------|----------|----------|-----------|----------|----------|----------|----------|-----------|----|
| AT1G28230 | PUP1      | 156.9353 | 174.8561 | 184.1346 | 242.9128 | 223.9139 | 202.3587 | 384.1791 | 337.6926 | 346.5673 | 259.0746 | 349.8778 | 194.7504 | 0.368791  | 0.095508 | 1.02241  | 3.11E-07 | 0.614918 | 0.025132  |    |
| AT1G28240 | AT1G28240 | 286.5259 | 289.0479 | 256.2432 | 221.0547 | 199.4026 | 264.1628 | 268.5697 | 271.8803 | 189.3917 | 162.9128 | 303.3161 | 265.1921 | -0.2797   | 0.158377 | -0.18326 | 0.413185 | -0.00183 | 0.997083  |    |
| AT1G28250 | AT1G28250 | 194.9802 | 217.6778 | 198.2988 | 353.8526 | 408.7423 | 310.0175 | 342.3818 | 241.6713 | 279.2064 | 192.8667 | 264.7365 | 243.438  | 0.798541  | 1.79E-05 | 0.941695 | 0.015617 | 0.191427 | 0.6204051 |    |
| AT1G28260 | SMG7L     | 323.3819 | 322.9485 | 289.7222 | 296.9392 | 236.5008 | 352.8816 | 361.9465 | 389.4793 | 260.6577 | 228.3695 | 276.7095 | 269.3357 | -0.08013  | 0.754032 | 0.11012  | 0.672371 | -0.26743 | 0.446507  |    |
| AT1G28270 | RALFL4    | 0        | 0        | 0        | 0        | 0        | 0        | 0.889303 | 0        | 0        | 0        | 0        | 0        | 0         | 0        | 0.160764 | NA       | 0        | NA        |    |
| AT1G28280 | VQ4       | 257.9922 | 226.5992 | 207.3123 | 335.2939 | 284.1985 | 338.9259 | 281.0199 | 283.7481 | 305.565  | 219.7337 | 227.4871 | 166.781  | 0.458779  | 0.007102 | 0.322289 | 0.085374 | -0.17447 | 0.595466  |    |
| AT1G28281 | AT1G28281 | 0        | 0        | 0        | 0        | 0.662467 | 0.996841 | 0        | 1.07889  | 0        | 0        | 0        | 0        | 0.274912  | NA       | 0.172872 | NA       | 0        | NA        |    |
| AT1G28290 | AGP31     | 778.7321 | 321.1643 | 400.4605 | 399.2183 | 471.0142 | 287.0901 | 275.6841 | 226.5669 | 387.5697 | 461.5366 | 408.4125 | 487.912  | -0.35396  | 0.281937 | -0.71141 | 0.022416 | -0.13854 | 0.836557  |    |
| AT1G28300 | LEC2      | 0        | 0        | 1.287654 | 1.649662 | 0        | 0        | 1.778607 | 0        | 0        | 0        | 2.660668 | 2.071813 | 0.05312   | NA       | 0.056335 | NA       | 0.38837  | NA        |    |
| AT1G28304 | AT1G28304 | 0        | 0        | 0        | 0        | 0        | 0        | 0        | 0        | 0        | 0        | 0        | 0        | #N/A      | #N/A     | #N/A     | #N/A     | #N/A     | #N/A      |    |
| AT1G28305 | AT1G28305 | 0        | 0        | 0        | 0        | 0        | 0        | 0        | 0        | 0.959536 | 0        | 0        | 0        | 0         | NA       | 0        | NA       | 0        | 1.71512   | NA |
| AT1G28306 | AT1G28306 | 0        | 0        | 0        | 0        | 0        | 0        | 0        | 0        | 0        | 0        | 0        | 0        | #N/A      | #N/A     | #N/A     | #N/A     | #N/A     | #N/A      |    |
| AT1G28307 | AT1G28307 | 0        | 0        | 0        | 0        | 0        | 0        | 0        | 0        | 0        | 0        | 0        | 0        | #N/A      | #N/A     | #N/A     | #N/A     | #N/A     | #N/A      |    |
| AT1G28310 | DOFL4     | 196.1692 | 114.1917 | 149.3679 | 134.4475 | 129.1811 | 152.5166 | 160.9639 | 168.3068 | 135.6982 | 137.2136 | 99.77505 | 143.991  | -0.15818  | NA       | 0.001246 | 0.996893 | -0.26832 | 0.505894  |    |
| AT1G28320 | DEG15     | 336.4598 | 378.2602 | 329.6395 | 364.9878 | 363.0321 | 387.7711 | 444.6517 | 483.3427 | 270.4201 | 308.0109 | 280.7005 | 310.772  | 0.094435  | 0.705975 | 0.19527  | 0.418694 | -0.20589 | 0.584305  |    |
| AT1G28323 | AT1G28323 | 0        | 0        | 0        | 0        | 0        | 0        | 0.889303 | 1.07889  | 0.976246 | 0.959536 | 0        | 0        | 0         | NA       | 0.546164 | NA       | 0.192033 | NA        |    |
| AT1G28327 | AT1G28327 | 0        | 0        | 0        | 0        | 0.662467 | 0        | 1.07889  | 0        | 0        | 0        | 0        | 1.035907 | 0.09889   | NA       | 0.162396 | NA       | 0.164429 | NA        |    |
| AT1G28330 | DYLL1     | 578.9962 | 785.0683 | 630.9506 | 988.1477 | 1020.2   | 1296.89  | 2797.749 | 3002.551 | 4945.662 | 593.9526 | 589.3379 | 570.7845 | 0.705365  | 0.001187 | 2.35605  | 5.2E-32  | -0.17743 | 0.684244  |    |
| AT1G28335 | LCR31     | 0        | 0        | 0        | 0        | 0        | 0        | 1.07889  | 0        | 0        | 0        | 0        | 0        | 0         | NA       | 0.16673  | NA       | 0        | NA        |    |
| AT1G28340 | ATLRP4    | 492.2062 | 515.6471 | 424.9259 | 437.1605 | 416.0294 | 444.591  | 480.2239 | 457.4493 | 364.1398 | 436.5887 | 397.7699 | 484.8043 | -0.13864  | 0.433673 | -0.13337 | 0.480404 | -0.11279 | 0.718015  |    |
| AT1G28350 | AT1G28350 | 288.9037 | 274.7739 | 291.0099 | 295.702  | 269.6242 | 312.0112 | 325.4851 | 348.4815 | 265.5389 | 337.7565 | 312.6285 | 273.4793 | 0.032935  | 0.876484 | 0.131486 | 0.505556 | 0.108823 | 0.743249  |    |
| AT1G28360 | ERF12     | 5.94452  | 3.568492 | 7.725926 | 4.536571 | 5.299738 | 2.990522 | 6.225124 | 5.39445  | 6.067889 | 7.676285 | 2.660668 | 9.323159 | -0.32168  | 0.634506 | 0.105884 | 0.893181 | 0.145878 | NA        |    |
| AT1G28370 | ERF11     | 4.755616 | 3.568492 | 6.438272 | 49.07745 | 55.64725 | 114.6367 | 184.0858 | 143.4924 | 221.6078 | 5.757214 | 5.321336 | 4.143626 | 3.111771  | 2.93E-14 | 4.379103 | 7E-28    | -0.0629  | 0.963009  |    |
| AT1G28375 | AT1G28375 | 0        | 5.327338 | 0        | 0.824831 | 0        | 0        | 0.889303 | 1.07889  | 0        | 5.757214 | 2.660668 | 5.179533 | -0.63864  | 0.349447 | -0.38341 | 0.616201 | 0.847491 | NA        |    |
| AT1G28380 | NSL1      | 417.3053 | 403.2396 | 352.8173 | 547.6879 | 402.7801 | 626.016  | 698.1032 | 758.4596 | 542.7928 | 312.8086 | 319.2802 | 277.6229 | 0.413786  | 0.380796 | 0.75036  | 8.39E-05 | -0.35799 | 0.248204  |    |
| AT1G28390 | AT1G28390 | 38.04493 | 33.90067 | 28.3284  | 27.63184 | 25.83622 | 14.95261 | 32.01493 | 32.3667  | 41.00233 | 31.66468 | 34.58868 | 18.64632 | -0.46863  | 0.205786 | 0.067266 | 0.889594 | -0.23045 | 0.750051  |    |
| AT1G28395 | AT1G28395 | 36.85602 | 44.60615 | 51.50617 | 72.58514 | 61.60946 | 36.88311 | 40.90796 | 42.07671 | 50.76479 | 46.05771 | 43.90102 | 48.68761 | 0.377676  | 0.245578 | 0.009798 | 0.881997 | 0.061303 | 0.938169  |    |
| AT1G28400 | AT1G28400 | 351.9156 | 228.3835 | 230.4901 | 281.6798 | 224.5764 | 224.2892 | 330.8209 | 357.1126 | 348.5198 | 213.9764 | 242.1208 | 216.5045 | -0.14857  | 0.51319  | 0.337843 | 0.110565 | -0.27294 | 0.413608  |    |
| AT1G28410 | AT1G28410 | 111.757  | 219.4623 | 222.7642 | 186.8243 | 182.1785 | 188.4029 | 241.0012 | 181.2535 | 140.5794 | 175.595  | 178.2648 | 170.9246 | 0.016268  | 0.9632   | 0.031597 | 0.931725 | -0.06712 | 0.915892  |    |
| AT1G28420 | HB-1      | 573.0517 | 494.2623 | 378.5704 | 223.1168 | 182.1785 | 283.1028 | 279.2413 | 245.2448 | 261.6339 | 346.3924 | 279.3701 | 390.5368 | -0.104286 | 5.91E-07 | -0.68553 | 0.001903 | -0.49043 | 0.122184  |    |
| AT1G28430 | CPV705A24 | 1.188904 | 3.568492 | 0        | 0.824831 | 0        | 0        | 2.66791  | 0        | 0        | 0.959536 | 1.330334 | 0        | -0.50554  | 0.415121 | -0.18534 | 0.800485 | -0.26478 | NA        |    |
| AT1G28440 | HSL1      | 896.4336 | 669.0923 | 636.1012 | 347.2539 | 321.9591 | 374.8121 | 347.7177 | 413.2148 | 329.9711 | 508.5539 | 389.7879 | 549.0305 | -0.105612 | 1.44E-09 | -0.99331 | 2.09E-08 | -0.59094 | 0.011411  |    |
| AT1G28447 | AT1G28447 | 0        | 0        | 0        | 0        | 0        | 0        | 0        | 0        | 0        | 0.959536 | 0        | 0        | 0         | NA       | 0        | NA       | 0        | 1.71512   | NA |
| AT1G28450 | AGL58     | 0        | 0        | 0        | 0.412416 | 0        | 0        | 1.778607 | 0        | 1.952492 | 0.959536 | 2.660668 | 2.071813 | -0.03485  | 0.962645 | 0.63612  | 0.306655 | 0.859155 | NA        |    |
| AT1G28455 | AT1G28455 | 0        | 0        | 0        | 0.412416 | 0        | 0        | 0        | 0        | 0        | 0        | 0        | 0        | 0.095918  | NA       | 0        | NA       | 0        | NA        |    |
| AT1G28460 | AGL59     | 0        | 0        | 1.287654 | 0.662467 | 0.996841 | 0        | 0        | 0        | 0        | 0        | 0        | 1.035907 | 0.051472  | NA       | -0.25028 | NA       | -0.04093 | NA        |    |
| AT1G28465 | AT1G28465 | 0        | 0        | 0        | 0.662467 | 0        | 0        | 0        | 0        | 0        | 0        | 0        | 0        | 0.128567  | NA       | 0        | NA       | 0        | NA        |    |
| AT1G28470 | NAC010    | 4.755616 | 3.568492 | 3.826963 | 10.7228  | 7.949607 | 11.96209 | 14.22886 | 8.63112  | 11.71495 | 10.55489 | 6.65167  | 13.46678 | 0.931999  | 0.086058 | 1.092088 | 0.050759 | 0.953592 | NA        |    |
| AT1G28480 | GRXC9     | 4.755616 | 3.568492 | 3.826963 | 105.9908 | 100.0326 | 117.6272 | 17.78607 | 21.5778  | 59.55101 | 8.838143 | 1.330334 | 2.071813 | 3.403031  | 6.96E-16 | 1.825712 | 0.000066 | -0.85562 | 0.319028  |    |
| AT1G28490 | SPY61     | 222.325  | 237.3047 | 243.3667 | 361.6885 | 380.9187 | 297.0586 | 266.791  | 267.5647 | 368.0447 | 335.8375 | 328.5925 | 291.0897 | 0.558169  | 0.001638 | 0.531735 | 0.071662 | 0.433529 | 0.091364  |    |
| AT1G28500 | AT1G28500 | 0        | 0        | 0        | 0.412416 | 0        | 0        | 1.778607 | 0        | 0        | 0        | 0        | 0        | 0.060593  | NA       | 0.260815 | NA       | 0        | NA        |    |
| AT1G28510 | AT1G28510 | 185.469  | 155.2294 | 164.8198 | 223.5292 | 233.8509 | 188.4029 | 186.7537 | 135.9401 | 191.3442 | 189.9881 | 208.8624 | 182.3195 | 0.345883  | 0.073996 | 0.021269 | 0.938057 | 0.187658 | 0.595038  |    |
| AT1G28520 | VOZ1      | 315.0595 | 303.3218 | 279.421  | 290.3406 | 263.662  | 321.9796 | 313.9241 | 294.537  | 252.8477 | 267.7104 | 190.2378 | 274.5152 | -0.03776  | 0.871533 | -0.05795 | 0.813158 | -0.28027 | 0.337689  |    |
| AT1G28530 | AT1G28530 | 87.97889 | 82.07532 | 95.28642 | 68.04857 | 88.77061 | 63.79781 | 72.92289 | 85.23231 | 62.47974 | 92.11542 | 111.7481 | 101.5188 | -0.25877  | 0.304493 | -0.26492 | 0.332499 | 0.186234 | 0.678029  |    |
| AT1G28540 | AT1G28540 | 39.23383 | 53.52738 | 45.0679  | 82.0707  | 79.49607 | 69.77885 | 84.48383 | 51.78672 | 106.4108 | 43.1791  | 41.24035 | 61.11849 | 0.722416  | 0.015154 | 0.78527  | 0.010311 | 0.08908  | 0.903758  |    |
| AT1G28550 | RABAI1    | 1.188904 | 0        | 0        | 0.412416 | 0.662467 | 0        | 0.889303 | 1.07889  | 0        | 0        | 0        | 0        | -0.127129 | NA       | 0.12795  | NA       | -0.25511 | NA        |    |
| AT1G28560 | SRD2      | 47.55616 | 37.46917 | 51.50617 | 52.78919 | 49.68505 | 34.88943 | 45.35448 | 43.1556  | 59.55101 | 75.80331 | 49.22236 | 48.68761 | 0.016285  | 0.968159 | 0.096782 | 0.815165 | 0.323848 | 0.552155  |    |
| AT1G28570 | AT1G28570 | 46.36725 | 58.88012 | 36.05432 | 84.95761 | 85.45828 | 81.74094 | 83.59453 | 84.15342 | 94.69586 | 35.50282 | 29.26735 | 48.68761 | 0.825773  | 0.00089  | 0.877586 | 0.000594 | -0.265   | 0.612544  |    |
| AT1G28580 | AT1G28580 | 203.3026 | 185.5616 | 207.3123 | 611.6123 | 641.9308 | 628.0097 | 546.0323 | 483.3427 | 639.4411 | 174.6355 | 176.9344 | 243.438  | 1.621781  | 1.88E-24 | 0.151986 | 2.00E-19 | -0.00528 | 0.992201  |    |
| AT1G28590 | AT1G28590 | 0        | 0        | 0        | 0        | 0.662467 | 0        | 0        | 0        | 0        | 0        | 1.330334 | 0        | 0.101524  | NA       | 0        | NA       | 0.179327 | NA        |    |
| AT1G28591 | AT1G28591 | 0        | 0        | 0        | 0        | 0        | 0        | 0        | 0        | 0        | 0        | 0        | 0        | #N/A      | #N/A     | #N/A     | #N/A     | #N/A     | #N/A      |    |
| AT1G28600 | AT1G28600 | 255.6143 | 294.4006 | 271.6951 | 495.7235 | 460.4148 | 471.5057 | 465.995  | 402.4259 | 448.0969 | 261.9532 | 308.6375 | 304.5565 | 0.794055  | 1.39E-09 | 0.678086 | 5.68E-07 | 0.09127  | 0.764628  |    |
| AT1G28610 | AT1G28610 | 242.5364 | 287.2636 | 252.3803 | 161.6669 | 165.6168 | 112.643  | 127.8794 | 173.7013 | 164.0093 | 338.7161 | 317.9498 | 338.7414 | -0.79139  | 1.15E-05 | -0.47457 | 0.015464 | 0.346814 | 0.221611  |    |
| AT1G28620 | AT1G28620 | 36.85602 | 28.54794 | 43.78025 | 14.84696 | 21.19895 | 14.95261 | 20.45398 | 11.86779 | 17.57243 | 36.46235 | 38.57969 | 36.25673 | -1.03028  | 0.002059 | -1.03318 | 0.004007 | 0.011835 | 0.990348  |    |
| AT1G28630 | AT1G28630 | 0        | 0        | 0        | 0        | 0        | 0        | 1.778607 | 0        | 0        | 0        | 0        | 1.035907 | 0         | NA       | 0.26262  | NA       | 0.150298 | NA        |    |
| AT1G28640 | AT1G28640 | 1.188904 | 1.784246 | 1.287654 | 2.062    |          |          |          |          |          |          |          |          |           |          |          |          |          |           |    |

|           |           |          |          |          |          |          |          |          |          |          |          |          |          |          |          |           |           |          |          |          |          |          |          |          |          |      |
|-----------|-----------|----------|----------|----------|----------|----------|----------|----------|----------|----------|----------|----------|----------|----------|----------|-----------|-----------|----------|----------|----------|----------|----------|----------|----------|----------|------|
| AT1G29075 | AT1G29075 | 1.188904 | 1.784246 | 0        | 0.412416 | 0        | 0        | 0.889303 | 0        | 0        | 0        | 0        | 0        | 0        | 0        | 0         | 0         | 0        | 0        | -0.40146 | NA       | -0.29287 | NA       | -0.48079 | NA       |      |
| AT1G29080 | AT1G29080 | 0        | 0        | 0        | 0        | 0        | 0        | 0        | 0        | 0        | 0        | 0        | 0        | 0        | 0        | 0         | 0         | 0        | 0        | 0        | #N/A     | #N/A     | #N/A     | #N/A     | #N/A     | #N/A |
| AT1G29090 | AT1G29090 | 0        | 0        | 0        | 0.824831 | 0        | 0.996841 | 0.889303 | 0        | 2.928738 | 0        | 0        | 1.035907 | 0.288926 | NA       | 0.594789  | NA        | 0.162572 | NA       | 0.162572 | NA       | 0.162572 | NA       | 0.162572 | NA       |      |
| AT1G29100 | AT1G29100 | 0        | 0        | 0        | 0        | 0        | 0        | 0        | 0        | 0        | 0        | 0        | 0        | 0        | 0        | 0         | 0         | 0        | 0        | 0        | #N/A     | #N/A     | #N/A     | #N/A     | #N/A     | #N/A |
| AT1G29110 | AT1G29110 | 2.377808 | 0        | 0        | 1.237247 | 0        | 0        | 1.07889  | 0        | 0        | 0        | 0        | 0        | 0        | 0        | 0         | 0         | 0        | 0        | 0        | -0.13047 | NA       | -0.18161 | NA       | -0.34339 | NA   |
| AT1G29120 | AT1G29120 | 236.5919 | 214.1095 | 251.0926 | 185.587  | 176.8788 | 230.2702 | 261.4552 | 303.1681 | 247.9665 | 325.2826 | 252.7635 | 277.6229 | -0.253   | 0.184434 | 0.201504  | 0.329662  | 0.280287 | 0.325972 | 0.280287 | 0.325972 | 0.280287 | 0.325972 | 0.280287 | 0.325972 |      |
| AT1G29140 | AT1G29140 | 0        | 1.784246 | 0        | 0        | 0        | 0        | 0        | 0        | 0.972646 | 0        | 0        | 1.035907 | -0.2933  | NA       | -0.08033  | NA        | -0.06705 | NA       | -0.06705 | NA       | -0.06705 | NA       | -0.06705 | NA       |      |
| AT1G29150 | RPN6      | 831.0439 | 822.5374 | 822.8111 | 922.5736 | 1014.9   | 1003.819 | 826.1629 | 949.4231 | 922.5525 | 786.8192 | 740.996  | 671.2674 | 0.244415 | 0.042292 | 0.121572  | 0.387187  | -0.16974 | 0.398073 | -0.16974 | 0.398073 | -0.16974 | 0.398073 | -0.16974 | 0.398073 |      |
| AT1G29160 | DOF1.5    | 11.88904 | 1.784246 | 10.30123 | 16.90904 | 15.23675 | 13.95577 | 21.34328 | 11.86779 | 40.02609 | 26.867   | 10.64267 | 14.50269 | 0.664426 | 0.219187 | 1.225919  | 0.017072  | 0.819088 | 0.309621 | 0.819088 | 0.309621 | 0.819088 | 0.309621 | 0.819088 | 0.309621 |      |
| AT1G29170 | SCAR3     | 198.547  | 140.9554 | 144.2173 | 70.93548 | 84.79581 | 83.73463 | 90.70896 | 96.0212  | 57.59851 | 145.8494 | 167.6221 | 145.0269 | -0.99594 | 5.16E-06 | -0.95887  | 0.000024  | -0.08486 | 0.870405 | -0.08486 | 0.870405 | -0.08486 | 0.870405 | -0.08486 | 0.870405 |      |
| AT1G29179 | AT1G29179 | 0        | 0        | 0        | 0        | 0        | 0        | 0        | 0        | 0        | 0        | 0        | 0        | #N/A     | #N/A     | #N/A      | #N/A      | #N/A     | #N/A     | #N/A     | #N/A     | #N/A     | #N/A     | #N/A     | #N/A     |      |
| AT1G29180 | AT1G29180 | 0        | 0        | 0        | 0        | 0        | 0        | 0        | 0        | 0        | 0        | 0        | 0        | #N/A     | #N/A     | #N/A      | #N/A      | #N/A     | #N/A     | #N/A     | #N/A     | #N/A     | #N/A     | #N/A     | #N/A     |      |
| AT1G29190 | AT1G29190 | 0        | 0        | 0        | 0        | 0        | 0        | 0        | 0        | 0        | 0        | 0        | 0        | #N/A     | #N/A     | #N/A      | #N/A      | #N/A     | #N/A     | #N/A     | #N/A     | #N/A     | #N/A     | #N/A     | #N/A     |      |
| AT1G29195 | AT1G29195 | 15.45575 | 8.92123  | 12.87654 | 14.02213 | 11.26194 | 11.96209 | 7.114428 | 9.710009 | 10.73871 | 13.4335  | 5.321336 | 9.323159 | -0.00446 | 0.994736 | -0.39084  | 0.501433  | -0.32921 | NA       | -0.32921 | NA       | -0.32921 | NA       | -0.32921 | NA       |      |
| AT1G29200 | AT1G29200 | 14.26685 | 5.352738 | 6.438272 | 1.237247 | 1.987402 | 4.984204 | 2.66791  | 1.07889  | 2.928738 | 2.878607 | 11.97301 | 7.251346 | -1.24602 | 0.039492 | -1.27034  | 0.054835  | -0.22298 | NA       | -0.22298 | NA       | -0.22298 | NA       | -0.22298 | NA       |      |
| AT1G29210 | AT1G29210 | 0        | 0        | 0        | 0        | 0        | 0        | 0        | 0        | 0        | 0        | 0        | 0        | #N/A     | #N/A     | #N/A      | #N/A      | #N/A     | #N/A     | #N/A     | #N/A     | #N/A     | #N/A     | #N/A     | #N/A     |      |
| AT1G29220 | AT1G29220 | 137.9129 | 157.0137 | 169.9704 | 193.4229 | 195.4278 | 215.3176 | 174.3035 | 199.5946 | 204.0354 | 191.9071 | 174.2738 | 171.9605 | 0.368318 | 0.030748 | 0.308698  | 0.096729  | 0.211735 | 0.48624  | 0.211735 | 0.48624  | 0.211735 | 0.48624  | 0.211735 | 0.48624  |      |
| AT1G29230 | CIPK18    | 4.755616 | 1.784246 | 4.438272 | 4.536571 | 2.649869 | 4.984204 | 6.225124 | 3.23667  | 5.857476 | 2.878607 | 3.991002 | 5.179533 | -0.11364 | 0.884062 | 0.14019   | 0.86492   | -0.11373 | NA       | -0.11373 | NA       | -0.11373 | NA       | -0.11373 | NA       |      |
| AT1G29240 | AT1G29240 | 102.2457 | 103.4863 | 82.40988 | 163.729  | 168.2667 | 155.5072 | 134.2848 | 155.3602 | 94.69586 | 71.96517 | 75.82904 | 82.82752 | 0.743197 | 0.000462 | 0.403754  | 0.096627  | -0.3056  | 0.447456 | -0.3056  | 0.447456 | -0.3056  | 0.447456 | -0.3056  | 0.447456 |      |
| AT1G29250 | AT1G29250 | 462.4836 | 433.5718 | 558.842  | 703.1686 | 737.3261 | 512.3762 | 485.5597 | 427.2404 | 750.7332 | 582.4381 | 533.4639 | 82.75439 | 0.411659 | 0.07709  | 1.85707   | 0.496638  | 0.246676 | 0.54074  | 0.246676 | 0.54074  | 0.246676 | 0.54074  | 0.246676 | 0.54074  |      |
| AT1G29260 | PEX7      | 223.5139 | 299.7533 | 225.3395 | 256.1101 | 300.0977 | 271.1407 | 269.459  | 254.618  | 407.0946 | 249.4793 | 212.8534 | 255.8689 | 0.146403 | 0.557275 | 0.31351   | 0.185657  | -0.04835 | 0.927984 | -0.04835 | 0.927984 | -0.04835 | 0.927984 | -0.04835 | 0.927984 |      |
| AT1G29265 | MIR399A   | 0        | 0        | 0        | 0        | 0        | 0        | 0        | 0        | 0        | 0        | 0        | 0        | #N/A     | #N/A     | #N/A      | #N/A      | #N/A     | #N/A     | #N/A     | #N/A     | #N/A     | #N/A     | #N/A     | #N/A     |      |
| AT1G29270 | AT1G29270 | 19.02246 | 16.05821 | 9.01358  | 42.89122 | 51.67245 | 35.88627 | 28.45771 | 26.97225 | 38.07359 | 11.51443 | 7.982004 | 23.82585 | 1.408209 | 0.000213 | 0.950988  | 0.023557  | -0.01022 | 0.992945 | -0.01022 | 0.992945 | -0.01022 | 0.992945 | -0.01022 | 0.992945 |      |
| AT1G29280 | WRKY65    | 3.566712 | 3.568492 | 2.975309 | 18.5587  | 16.56168 | 11.96209 | 14.22886 | 32.3667  | 17.57243 | 4.797678 | 3.991002 | 2.071813 | 1.685915 | 0.001091 | 2.032557  | 0.000078  | 0.044206 | NA       | 0.044206 | NA       | 0.044206 | NA       | 0.044206 | NA       |      |
| AT1G29290 | AT1G29290 | 1.188904 | 5.352738 | 3.862963 | 24.33252 | 28.48609 | 37.87995 | 28.45771 | 24.81447 | 44.90732 | 1.919071 | 0        | 1.035907 | 2.493996 | 1.24E-07 | 2.608895  | 3.9E-08   | -0.70464 | 0.491396 | -0.70464 | 0.491396 | -0.70464 | 0.491396 | -0.70464 | 0.491396 |      |
| AT1G29300 | UNE1      | 39.23383 | 37.46917 | 34.76667 | 47.01538 | 54.98478 | 60.80729 | 56.02612 | 66.89118 | 82.00466 | 66.46235 | 30.59768 | 26.93357 | 0.499384 | 0.029681 | 0.830861  | 0.003999  | -0.22686 | 0.711776 | -0.22686 | 0.711776 | -0.22686 | 0.711776 | -0.22686 | 0.711776 |      |
| AT1G29310 | AT1G29310 | 261.5589 | 244.4417 | 281.9963 | 913.0881 | 860.545  | 989.8629 | 729.2239 | 763.8541 | 604.2965 | 236.0458 | 199.5501 | 204.0736 | 1.779541 | 1.49E-38 | 1.386897  | 0.352E-23 | -0.29572 | 0.239391 | -0.29572 | 0.239391 | -0.29572 | 0.239391 | -0.29572 | 0.239391 |      |
| AT1G29320 | AT1G29320 | 141.4796 | 117.7602 | 131.3407 | 204.9705 | 209.3397 | 200.365  | 183.1965 | 190.9635 | 205.9879 | 181.3522 | 184.9164 | 142.9551 | 0.63311  | 0.00017  | 0.548991  | 0.002058  | 0.361557 | 0.181844 | 0.361557 | 0.181844 | 0.361557 | 0.181844 | 0.361557 | 0.181844 |      |
| AT1G29330 | ERD2A     | 68.95643 | 76.72258 | 60.51975 | 116.7136 | 143.7554 | 103.6714 | 132.5062 | 78.75897 | 125.9357 | 66.20796 | 45.23135 | 46.61579 | 0.795533 | 0.002234 | 0.688591  | 0.012313  | -0.34564 | 0.484078 | -0.34564 | 0.484078 | -0.34564 | 0.484078 | -0.34564 | 0.484078 |      |
| AT1G29340 | PUB17     | 576.6184 | 528.1368 | 512.4864 | 429.737  | 416.6919 | 536.3003 | 536.25   | 635.4662 | 517.4104 | 396.2882 | 324.6015 | 445.4398 | -0.22736 | 0.211609 | 0.05999   | 0.79374   | -0.46008 | 0.042634 | -0.46008 | 0.042634 | -0.46008 | 0.042634 | -0.46008 | 0.042634 |      |
| AT1G29350 | AT1G29350 | 551.6514 | 524.5683 | 475.1445 | 508.9208 | 390.8557 | 534.3067 | 548.7002 | 604.1784 | 312.3987 | 510.473  | 488.2326 | 440.2603 | -0.11034 | 0.692458 | -0.07999  | 0.975669  | -0.10485 | 0.836689 | -0.10485 | 0.836689 | -0.10485 | 0.836689 | -0.10485 | 0.836689 |      |
| AT1G29355 | AT1G29355 | 2.377808 | 0        | 3.862963 | 3.299235 | 4.637271 | 1.863962 | 3.527214 | 0        | 3.904984 | 1.919071 | 1.330334 | 1.035907 | 0.353299 | 0.642902 | 0.089854  | 0.910932  | -0.27412 | NA       | -0.27412 | NA       | -0.27412 | NA       | -0.27412 | NA       |      |
| AT1G29357 | AT1G29357 | 38.04493 | 46.3904  | 43.78025 | 58.97543 | 70.22153 | 43.86099 | 55.13682 | 53.9445  | 56.62227 | 35.50282 | 21.28534 | 50.75942 | 0.42869  | 0.186857 | 0.355041  | 0.322087  | -0.20811 | 0.752476 | -0.20811 | 0.752476 | -0.20811 | 0.752476 | -0.20811 | 0.752476 |      |
| AT1G29360 | AT1G29360 | 0        | 0        | 0        | 0.412416 | 0.662467 | 0        | 0.889303 | 0        | 0        | 0        | 0        | 0        | 0.208167 | NA       | 0.156588  | NA        | 0        | NA       | 0        | NA       | 0        | NA       | 0        | NA       |      |
| AT1G29370 | AT1G29370 | 622.9857 | 574.5272 | 574.2938 | 523.3554 | 433.2536 | 574.1803 | 576.2687 | 639.7817 | 344.6148 | 497.999  | 529.4729 | 474.4452 | -0.20661 | 0.386959 | -0.17875  | 0.486554  | -0.23261 | 0.541828 | -0.23261 | 0.541828 | -0.23261 | 0.541828 | -0.23261 | 0.541828 |      |
| AT1G29380 | AT1G29380 | 21.40027 | 16.05821 | 14.1642  | 15.25938 | 11.92441 | 19.93682 | 16.00746 | 14.02557 | 7.809968 | 17.27164 | 27.93701 | 14.50269 | -0.14418 | 0.78824  | -0.391    | 0.460121  | 0.155299 | 0.879545 | 0.155299 | 0.879545 | 0.155299 | 0.879545 | 0.155299 | 0.879545 |      |
| AT1G29390 | CORA13IM2 | 438.7056 | 537.0581 | 512.4864 | 377.3603 | 433.9161 | 328.9575 | 455.3234 | 467.1593 | 688.2534 | 578.6    | 742.3264 | 474.4452 | -0.36911 | 0.106257 | -0.112389 | 0.68843   | 0.262168 | 0.490915 | 0.262168 | 0.490915 | 0.262168 | 0.490915 | 0.262168 | 0.490915 |      |
| AT1G29395 | CORA13IM1 | 770.4098 | 1300.715 | 1027.548 | 269.3074 | 301.4226 | 274.1312 | 413.5261 | 380.8481 | 551.579  | 946.1021 | 844.7621 | 835.9766 | -1.82132 | 1.41E-22 | -1.16773  | 9.13E-10  | -0.22871 | 0.524941 | -0.22871 | 0.524941 | -0.22871 | 0.524941 | -0.22871 | 0.524941 |      |
| AT1G29400 | M15       | 1324.439 | 1248.972 | 1117.684 | 926.2854 | 907.5802 | 994.8471 | 1051.157 | 1093.994 | 824.9279 | 966.2524 | 905.9574 | 916.7773 | -0.38024 | 0.005876 | -0.30989  | 0.033956  | -0.3988  | 0.027445 | -0.3988  | 0.027445 | -0.3988  | 0.027445 | -0.3988  | 0.027445 |      |
| AT1G29410 | PAI3      | 97.49012 | 87.42806 | 96.14938 | 78.77137 | 77.50867 | 93.70303 | 98.71269 | 71.20674 | 71.26596 | 97.82623 | 106.4267 | 103.5907 | -0.19717 | 0.423871 | -0.22816  | 0.386127  | 0.104609 | 0.83156  | 0.104609 | 0.83156  | 0.104609 | 0.83156  | 0.104609 | 0.83156  |      |
| AT1G29418 | AT1G29418 | 78.46766 | 57.09587 | 63.09506 | 84.13278 | 120.569  | 75.7599  | 104.9378 | 63.65451 | 76.14719 | 65.24849 | 47.89202 | 91.15977 | 0.463108 | 0.140551 | 0.277899  | 0.442259  | 0.037031 | 0.964031 | 0.037031 | 0.964031 | 0.037031 | 0.964031 | 0.037031 | 0.964031 |      |
| AT1G29420 | SAUR61    | 13.07794 | 12.48972 | 20.60247 | 7.011065 | 3.312336 | 1.993682 | 4.446517 | 1.07889  | 3.904984 | 13.4335  | 30.59768 | 20.71813 | -1.41404 | 0.005372 | -1.66612  | 0.001881  | 0.409742 | NA       | 0.409742 | NA       | 0.409742 | NA       | 0.409742 | NA       |      |
| AT1G29430 | SAUR62    | 130.7794 | 105.     |          |          |          |          |          |          |          |          |          |          |          |          |           |           |          |          |          |          |          |          |          |          |      |

|           |             |          |          |          |          |          |          |          |          |          |          |          |          |          |          |          |          |          |          |
|-----------|-------------|----------|----------|----------|----------|----------|----------|----------|----------|----------|----------|----------|----------|----------|----------|----------|----------|----------|----------|
| AT1G2990  | PF06        | 328.1375 | 396.1026 | 450.679  | 678.836  | 743.9507 | 628.0097 | 535.3607 | 413.2148 | 665.7998 | 470.1725 | 537.4549 | 487.912  | 0.78653  | 1.92E-05 | 0.449079 | 0.026034 | 0.339202 | 0.263611 |
| AT1G3000  | MNS5        | 236.5919 | 281.9109 | 242.079  | 268.4825 | 288.8357 | 334.9385 | 354.8321 | 313.957  | 348.5198 | 214.936  | 183.5861 | 224.7917 | 0.225472 | 0.190659 | 0.42095  | 0.010871 | -0.27023 | 0.310967 |
| AT1G3000  | AT1G30010   | 60.6341  | 48.17464 | 65.67037 | 38.35465 | 41.07297 | 49.84204 | 51.5796  | 48.55005 | 38.07359 | 44.13864 | 37.24935 | 59.04667 | -0.44306 | 0.126585 | -0.32995 | 0.310915 | -0.29916 | 0.561658 |
| AT1G30016 | AT1G30016   | 1.188904 | 0        | 0        | 0        | 0        | 0        | 0        | 0        | 0        | 0        | 0        | 0        | -0.2184  | NA       | -0.20558 | NA       | -0.19918 | NA       |
| AT1G30020 | AT1G30020   | 1.188904 | 0        | 0        | 0        | 0        | 0        | 0        | 0        | 0        | 0        | 0        | 0        | -0.21734 | NA       | -0.1981  | NA       | 0.123077 | NA       |
| AT1G30030 | AT1G30030   | 0        | 1.784246 | 0        | 0        | 0        | 0        | 3.557214 | 0        | 0        | 0.959536 | 0        | 1.035907 | -0.31916 | NA       | 0.293487 | NA       | 0.074625 | NA       |
| AT1G30040 | GAZ0X2      | 24.96698 | 23.1952  | 36.05432 | 43.71605 | 38.4231  | 29.90522 | 67.58706 | 58.26006 | 54.66978 | 39.34096 | 29.26735 | 33.14901 | 0.391482 | 0.248177 | 1.02154  | 0.000845 | 0.24601  | 0.700478 |
| AT1G30050 | AT1G30050   | 0        | 0        | 0        | 0        | 2.062078 | 1.324935 | 0        | 0        | 0        | 0        | 0        | 0        | 0.556115 | NA       | 0        | NA       | 0        | NA       |
| AT1G30060 | AT1G30060   | 0        | 0        | 0        | 0        | 0.412416 | 0        | 0        | 0        | 0        | 0        | 0        | 0        | 0.095918 | NA       | 0        | NA       | 0        | NA       |
| AT1G30070 | AT1G30070   | 99.86793 | 107.0548 | 119.7519 | 151.7689 | 142.4305 | 135.5703 | 104.0485 | 110.0468 | 123.007  | 126.6587 | 87.80204 | 114.9856 | 0.392341 | 0.054331 | 0.043054 | 0.881915 | 0.023668 | 0.966307 |
| AT1G30080 | AT1G30080   | 1.188904 | 0        | 2.575309 | 0.824831 | 3.974804 | 2.990522 | 0.889303 | 2.15778  | 0        | 0        | 1.330334 | 1.035907 | 0.445525 | 0.538249 | -0.1508  | 0.857564 | -0.2544  | NA       |
| AT1G30090 | AT1G30090   | 215.1916 | 212.3253 | 243.3667 | 185.9994 | 155.0173 | 182.4219 | 152.9602 | 208.2258 | 224.5366 | 184.2308 | 154.3187 | 193.7145 | -0.3509  | 0.077123 | -0.19582 | 0.391426 | -0.32285 | 0.296514 |
| AT1G30100 | NCED5       | 4.755616 | 5.352738 | 2.575309 | 3.299325 | 1.987402 | 2.990522 | 6.225124 | 2.15778  | 3.904984 | 0.959536 | 1.330334 | 0        | -0.34496 | 0.644382 | 0.027807 | 0.974803 | -1.11088 | NA       |
| AT1G30110 | NUD2T5      | 30.9115  | 24.97944 | 33.47901 | 21.85803 | 27.82363 | 23.92418 | 26.6791  | 20.49891 | 36.1211  | 52.77446 | 38.57969 | 39.36445 | -0.28364 | 0.459525 | -0.10319 | 0.824754 | 0.507423 | 0.341028 |
| AT1G30120 | PDH-E1 BETA | 1028.402 | 911.7497 | 869.1667 | 657.8028 | 566.4095 | 612.0662 | 585.1617 | 634.3873 | 612.1062 | 901.9635 | 909.9484 | 91.9185  | -0.60733 | 6.92E-08 | -0.61343 | 8.65E-08 | -0.04135 | 0.880395 |
| AT1G30130 | AT1G30130   | 117.7015 | 117.7602 | 126.1901 | 115.4764 | 112.6194 | 111.6462 | 116.4988 | 133.7824 | 141.5557 | 141.0517 | 130.3727 | 137.7756 | -0.08776 | 0.693862 | 0.109269 | 0.641751 | 0.17585  | 0.608272 |
| AT1G30135 | TIFYS4      | 2.377808 | 1.784246 | 6.438272 | 4.948987 | 7.28714  | 8.971567 | 18.67537 | 8.63112  | 32.21612 | 0.766285 | 2.660668 | 1.035907 | 0.560982 | 0.391974 | 1.779486 | 0.001784 | 0.028605 | NA       |
| AT1G30140 | AT1G30140   | 1.188904 | 0        | 0        | 0        | 0        | 0        | 0.889303 | 2.15778  | 0        | 0.959536 | 1.330334 | 0        | -0.29747 | NA       | -0.0612  | NA       | 0.161183 | NA       |
| AT1G30150 | AT1G30150   | 0        | 0        | 0        | 0        | 0.662467 | 0        | 0        | 0        | 0        | 0        | 0        | 1.035907 | 0.098893 | NA       | 0        | NA       | 0.150283 | NA       |
| AT1G30160 | AT1G30160   | 28.53369 | 10.70548 | 21.89012 | 9.897974 | 10.59948 | 8.971567 | 8.893035 | 9.710009 | 11.71495 | 14.39303 | 19.95501 | 17.61041 | -0.94977 | 0.02688  | -0.9123  | 0.049656 | -0.25456 | NA       |
| AT1G30170 | AT1G30170   | 0        | 0        | 0        | 0        | 1.993682 | 0.889303 | 2.15778  | 0.976246 | 0.959536 | 2.660668 | 2.071813 | 0        | 0.20658  | 0.771858 | 0.624994 | 0.333434 | 0.824708 | NA       |
| AT1G30180 | AT1G30180   | 0        | 1.784246 | 0        | 0        | 0        | 0        | 0        | 1.07889  | 0        | 0        | 0        | 0        | -0.26712 | NA       | -0.06363 | NA       | -0.24374 | NA       |
| AT1G30190 | AT1G30190   | 15.45575 | 17.84246 | 23.17778 | 23.09527 | 28.48609 | 36.88311 | 46.24378 | 59.33895 | 49.78855 | 15.35257 | 25.27635 | 20.71813 | 0.544423 | 0.149598 | 1.339859 | 9.13E-05 | 0.0782   | 0.935116 |
| AT1G30200 | AT1G30200   | 469.6171 | 528.1368 | 464.8432 | 369.5244 | 382.2436 | 408.7047 | 302.3632 | 358.1915 | 365.116  | 373.2594 | 377.8148 | 468.1759 | -0.32882 | 0.029    | -0.50285 | 0.000768 | -0.2566  | 0.277498 |
| AT1G30210 | TCP24       | 618.2301 | 645.8971 | 667.0049 | 588.9294 | 610.1324 | 640.9686 | 641.1878 | 661.3595 | 535.9591 | 730.2066 | 774.2544 | 626.7593 | -0.67047 | 0.674031 | -0.06999 | 0.694955 | 0.140806 | 0.574689 |
| AT1G30220 | INT2        | 7.133424 | 5.352738 | 10.30123 | 44.9533  | 55.64725 | 48.8452  | 63.14055 | 50.70783 | 60.52725 | 63.68281 | 10.64267 | 12.43088 | 2.336703 | 1.28E-10 | 2.55227  | 2.55E-12 | 0.298968 | 0.740119 |
| AT1G30230 | AT1G30230   | 5294.189 | 5406.265 | 6129.235 | 6535.55  | 8019.166 | 6541.269 | 6446.561 | 5749.404 | 8606.585 | 6208.196 | 7195.776 | 5563.854 | 0.319341 | 0.084402 | 0.299555 | 0.122475 | 0.168815 | 0.606786 |
| AT1G30240 | AT1G30240   | 108.1903 | 85.64381 | 86.27284 | 70.93548 | 75.52127 | 92.70619 | 97.82338 | 91.70564 | 74.1947  | 71.00564 | 75.82904 | 78.7289  | -0.24678 | 0.316945 | -0.09091 | 0.764362 | -0.31118 | 0.430837 |
| AT1G30250 | AT1G30250   | 78.46766 | 85.64381 | 72.10864 | 56.08852 | 58.95959 | 33.89259 | 100.4913 | 83.07453 | 198.1795 | 95.95356 | 183.5861 | 85.98024 | -0.59133 | 0.117394 | 0.638441 | 0.095398 | 0.571682 | 0.31129  |
| AT1G30260 | AT1G30260   | 64.20081 | 85.64381 | 77.5605  | 86.60727 | 98.70762 | 58.81361 | 31.6169  | 90.62675 | 240.1565 | 127.6182 | 102.4357 | 107.7343 | 0.047412 | 0.914246 | 0.901141 | 0.005849 | 0.47761  | 0.372189 |
| AT1G30270 | CIPK23      | 259.1811 | 189.1301 | 216.3259 | 358.3891 | 300.5712 | 371.8216 | 383.2898 | 376.5326 | 347.5436 | 223.5718 | 166.2917 | 167.8169 | 0.651309 | 8.79E-05 | 0.713188 | 2.16E-05 | -0.25126 | 0.407847 |
| AT1G30280 | AT1G30280   | 55.87849 | 53.52738 | 63.09506 | 47.42779 | 45.04777 | 38.87679 | 50.70783 | 44.90732 | 59.49121 | 63.85603 | 83.90843 | 0        | -0.36766 | 0.185997 | -0.21439 | 0.505895 | 0.251759 | 0.507334 |
| AT1G30282 | AT1G30282   | 3.566712 | 0        | 1.287654 | 2.886909 | 1.987402 | 0.996841 | 0.889303 | 1.07889  | 0.976246 | 0.959536 | 0        | 2.071813 | 0.152126 | 0.85258  | -0.31786 | 0.680337 | -0.27266 | NA       |
| AT1G30290 | AT1G30290   | 102.2457 | 85.64381 | 69.53333 | 55.26369 | 47.69764 | 50.83888 | 57.58706 | 53.9445  | 60.52725 | 66.20796 | 78.82004 | 70.44164 | -0.71213 | 0.00234  | -0.47929 | 0.064099 | -0.25037 | 0.5675   |
| AT1G30300 | AT1G30300   | 83.22328 | 87.42806 | 64.38272 | 101.4542 | 129.1811 | 108.6556 | 136.0634 | 90.62675 | 103.4821 | 83.4796  | 74.4987  | 73.54936 | 0.515468 | 0.030285 | 0.484645 | 0.055809 | -0.012   | 0.987026 |
| AT1G30310 | AT1G30310   | 0        | 0        | 0        | 0        | 0        | 0        | 2.15778  | 0        | 0        | 0        | 0        | 0        | 0        | NA       | 0.266481 | 0        | 0        | NA       |
| AT1G30320 | AT1G30320   | 159.3131 | 110.6233 | 168.6827 | 173.627  | 149.0551 | 170.4598 | 210.7649 | 253.5391 | 289.9451 | 171.7569 | 194.2288 | 126.3806 | 0.150688 | 0.566057 | 0.744654 | 0.000649 | 0.143668 | 0.757199 |
| AT1G30330 | ARF6        | 1116.381 | 695.856  | 638.6766 | 287.4537 | 256.3748 | 363.8469 | 349.4963 | 435.8715 | 271.3964 | 566.126  | 586.6773 | 529.3482 | -1.38561 | 4.37E-10 | -1.17169 | 2.25E-07 | -0.52558 | 0.123878 |
| AT1G30340 | AT1G30340   | 1.188904 | 0        | 0        | 0        | 0.996841 | 0        | 2.15778  | 0        | 0        | 0        | 0        | 0        | -0.06416 | NA       | 0.102626 | NA       | -0.19806 | NA       |
| AT1G30350 | AT1G30350   | 0        | 0        | 0        | 0        | 0        | 0        | 0        | 0        | 0        | 0        | 0        | 0        | #N/A     | #N/A     | #N/A     | #N/A     | #N/A     | #N/A     |
| AT1G30360 | ERD4        | 2318.363 | 2333.794 | 1981.7   | 1421.184 | 1422.98  | 1772.383 | 2075.634 | 2503.025 | 1705.502 | 1600.505 | 1571.124 | 1636.732 | -0.51512 | 0.001377 | -0.07674 | 0.722083 | -0.45585 | 0.034513 |
| AT1G30370 | AT1G30370   | 1.188904 | 3.568492 | 0        | 3.71174  | 5.299738 | 4.984204 | 3.557214 | 1.07889  | 3.904984 | 1.919071 | 2.660668 | 1.035907 | 0.931058 | 0.159974 | 0.46307  | 0.549605 | 0.117097 | NA       |
| AT1G30380 | PSAK        | 14100.4  | 15269.58 | 15128.65 | 9591.137 | 10369.6  | 7285.909 | 8805.883 | 6718.248 | 15239.2  | 17220.79 | 17442.01 | 19832.43 | -0.67917 | 0.005772 | -0.51118 | 0.050974 | 0.280831 | 0.522993 |
| AT1G30390 | AT1G30390   | 1.188904 | 0        | 1.287654 | 1.237247 | 0.662467 | 0        | 0.889303 | 2.15778  | 0        | 0        | 1.330334 | 0        | -0.0786  | NA       | 0.062178 | NA       | -0.2369  | NA       |
| AT1G30400 | ABCC1       | 1484.941 | 1372.085 | 1246.449 | 1010.006 | 919.5046 | 1159.326 | 1455.79  | 1592.442 | 1010.415 | 1196.541 | 1106.838 | 1205.795 | -0.40277 | 0.025855 | -0.01582 | 0.950303 | -0.22084 | 0.475852 |
| AT1G30410 | ATMRP13     | 443.4612 | 463.904  | 439.0901 | 617.3861 | 558.4599 | 817.4094 | 546.0323 | 577.2061 | 287.0163 | 392.4501 | 367.1722 | 338.7414 | 0.543964 | 0.024676 | 0.064463 | 0.846168 | -0.28188 | 0.509223 |
| AT1G30420 | ABCC11      | 162.8798 | 187.3458 | 185.4222 | 275.906  | 259.6872 | 373.8153 | 369.9502 | 424.0037 | 219.6553 | 136.2541 | 156.9794 | 135.7038 | 0.731789 | 0.002315 | 0.886285 | 0.000214 | -0.3076  | 0.483017 |
| AT1G30430 | AT1G30430   | 0        | 0        | 0        | 0        | 0        | 0        | 0        | 0        | 0        | 0        | 0        | 0        | #N/A     | #N/A     | #N/A     | #N/A     | #N/A     | #N/A     |
| AT1G30440 | AT1G30440   | 596.8298 | 419.2978 | 381.1457 | 238.7886 | 227.2263 | 252.2007 | 213.4328 | 253.5391 | 274.3251 | 327.2016 | 440.3405 | 371.8904 | -0.94033 | 6.43E-07 | -0.89508 | 3.48E-06 | -0.29312 | 0.370292 |
| AT1G30450 | CCCI        | 367.3713 | 299.7533 | 258.8185 | 240.4383 | 237.8258 | 315.0017 | 337.9353 | 286.9847 | 222.5841 | 280.1844 | 296.6645 | 276.587  | -0.22567 | 0.317472 | -0.12511 | 0.691263 | -0.1173  | 0.785871 |
| AT1G30455 | AT1G30455   | 3.566712 | 3.568492 | 5.150617 | 2.886909 | 3.312336 | 2.990522 | 6.47334  | 1.952492 | 4.797678 | 2.660668 | 4.143626 | 0        | -0.29266 | 0.691055 | 0.106877 | 0.883425 | -0.03985 | NA       |
| AT1G30460 | CPSF30      | 127.2127 | 146.3082 | 148.0802 | 177.3387 | 143.7554 | 184.4155 | 167.1891 | 181.2535 | 158.5119 | 148.728  | 179.5951 | 142.9551 | 0.257751 | 0.198312 | 0.261684 | 0.221742 | 0.154166 | 0.680022 |
| AT1G30470 | AT1G30470   | 640.8192 | 727.9274 | 570.4309 | 523.3554 | 558.4599 | 598.1045 | 592.2761 | 613.8884 | 446.1444 | 643.8484 | 776.915  | 586.3231 | -0.22419 | 0.290331 |          |          |          |          |

|           |           |          |          |          |          |          |          |          |            |          |          |          |           |          |          |           |          |          |          |
|-----------|-----------|----------|----------|----------|----------|----------|----------|----------|------------|----------|----------|----------|-----------|----------|----------|-----------|----------|----------|----------|
| AT1G30900 | VSR6      | 101.0568 | 126.6815 | 114.6012 | 576.557  | 492.2132 | 534.3067 | 265.0124 | 305.3259   | 204.0354 | 46.05771 | 42.57069 | 55.93895  | 2.186996 | 9.09E-34 | 1.153556  | 1.72E-09 | -1.16967 | 4.12E-06 |
| AT1G30910 | AT1G30910 | 218.7583 | 281.9109 | 318.0506 | 319.6221 | 348.4578 | 316.9954 | 310.3669 | 289.1425   | 370.9735 | 322.404  | 235.4691 | 386.3931  | 0.26182  | 0.249362 | 0.240954  | 0.321436 | 0.206463 | 0.594499 |
| AT1G30920 | AT1G30920 | 1.188904 | 0        | 0        | 0        | 0        | 0        | 1.778607 | 0          | 2.928738 | 0        | 0        | 0         | -0.29867 | NA       | 0.510677  | NA       | -0.23725 | NA       |
| AT1G30921 | AT1G30921 | 0        | 0        | 0        | 0        | 0        | 0        | 0        | 0          | 0        | 0        | 0        | 0         | #N/A     | #N/A     | #N/A      | #N/A     | #N/A     | #N/A     |
| AT1G30925 | AT1G30925 | 0        | 0        | 0        | 0        | 0        | 0        | 0        | 0          | 0        | 0        | 0        | 0         | #N/A     | #N/A     | #N/A      | #N/A     | #N/A     | #N/A     |
| AT1G30930 | AT1G30930 | 0        | 0        | 0        | 0        | 0        | 0        | 0        | 0          | 0        | 0        | 0        | 0         | #N/A     | #N/A     | #N/A      | #N/A     | #N/A     | #N/A     |
| AT1G30935 | AT1G30935 | 4.755616 | 1.784246 | 5.150617 | 9.897974 | 12.58688 | 9.837663 | 7.114428 | 2.15778    | 17.52743 | 13.4335  | 9.312338 | 14.50269  | 0.756111 | 0.219619 | 0.746035  | 0.253556 | 1.110799 | NA       |
| AT1G30940 | AT1G30940 | 1.188904 | 0        | 1.287654 | 1.649662 | 1.324935 | 0        | 0        | 0          | 0        | 0.959536 | 1.330334 | 1.035907  | 0.137707 | NA       | -0.15834  | NA       | 0.106425 | NA       |
| AT1G30945 | AT1G30945 | 0        | 0        | 0        | 0        | 0        | 0        | 0        | 0          | 0        | 0        | 0        | 0         | #N/A     | #N/A     | #N/A      | #N/A     | #N/A     | #N/A     |
| AT1G30950 | UFO       | 1.188904 | 0        | 0        | 0.412416 | 1.324935 | 0        | 0.889303 | 1.07889    | 0        | 0        | 0        | 0.1035907 | 0.09055  | NA       | 0.110019  | NA       | -0.04724 | NA       |
| AT1G30960 | ERG       | 68.95643 | 35.68492 | 48.93086 | 56.08852 | 47.69764 | 57.81677 | 48.02239 | 51.78672   | 53.69353 | 40.3005  | 45.23135 | 52.83123  | 0.039847 | 0.913943 | -0.03059  | 0.939195 | -0.17216 | 0.773081 |
| AT1G30970 | SUF4      | 435.1388 | 435.356  | 494.4593 | 479.2269 | 443.8531 | 529.3225 | 556.704  | 518.9461   | 307.5175 | 421.2361 | 449.6529 | 419.5421  | 0.085217 | 0.740932 | 0.018159  | 0.950589 | -0.08011 | 0.865673 |
| AT1G30972 | AT1G30972 | 0        | 0        | 0        | 0.412416 | 0        | 0        | 0.889303 | 0          | 0        | 0        | 0        | 0         | 0.066991 | NA       | 0.136991  | NA       | 0        | NA       |
| AT1G30974 | AT1G30974 | 0        | 0        | 0        | 0        | 0        | 0        | 0        | 0          | 0        | 0        | 0        | 0         | #N/A     | #N/A     | #N/A      | #N/A     | #N/A     | #N/A     |
| AT1G30975 | AT1G30975 | 0        | 0        | 0        | 0        | 0        | 0        | 0        | 0          | 0        | 0        | 0        | 0         | #N/A     | #N/A     | #N/A      | #N/A     | #N/A     | #N/A     |
| AT1G30980 | AT1G30980 | 0        | 0        | 0        | 0        | 0        | 0        | 0        | 0          | 0        | 0        | 0        | 0         | #N/A     | #N/A     | #N/A      | #N/A     | #N/A     | #N/A     |
| AT1G30990 | AT1G30990 | 0        | 0        | 0        | 0.412416 | 0.662467 | 0        | 0        | 0          | 0        | 0        | 0        | 0         | 0.196313 | NA       | 0         | NA       | 0        | NA       |
| AT1G31000 | AT1G31000 | 0        | 0        | 0        | 0.662467 | 0        | 0.889303 | 0        | 0          | 0        | 0        | 0        | 0         | 0.097058 | NA       | 0.130384  | NA       | 0        | NA       |
| AT1G31010 | OSB4      | 41.61164 | 42.8219  | 38.62963 | 78.35896 | 74.8588  | 61.80413 | 80.03731 | 45.31338   | 60.52725 | 43.1791  | 37.24935 | 48.68761  | 0.778717 | 0.005189 | 0.57272   | 0.062518 | 0.072701 | 0.92132  |
| AT1G31020 | ATO2      | 67.76752 | 90.99655 | 103.0123 | 110.115  | 145.0803 | 100.6809 | 103.1592 | 90.62675   | 151.3181 | 72.92471 | 70.5077  | 62.15439  | 0.432496 | 0.114013 | 0.387277  | 0.189207 | -0.32664 | 0.497239 |
| AT1G31030 | AT1G31030 | 0        | 0        | 1.784246 | 0        | 0        | 0        | 0.889303 | 0          | 0        | 0.959536 | 0        | 0         | -0.29276 | NA       | -0.0886   | NA       | -0.07394 | NA       |
| AT1G31040 | AT1G31040 | 32.10041 | 16.05821 | 24.46543 | 16.49662 | 17.22415 | 13.95577 | 22.23259 | 14.02557   | 19.52492 | 47.97678 | 29.26735 | 38.32854  | -0.57053 | 0.148395 | -0.36451  | 0.421786 | 0.602251 | 0.293506 |
| AT1G31050 | BHLH11    | 2.377808 | 1.784246 | 2.575309 | 1.237247 | 0        | 2.990522 | 0        | 1.07889    | 0.976246 | 1.919071 | 1.330334 | 1.035907  | -0.34685 | 0.646329 | -0.6503   | 0.366449 | -0.28332 | NA       |
| AT1G31070 | SLCNC1PUT | 222.325  | 121.3287 | 197.0111 | 120.0129 | 95.39529 | 116.6304 | 104.9378 | 138.0979   | 85.90965 | 166.9592 | 170.2827 | 179.2118  | -0.68932 | 0.003687 | -0.70549  | 0.004129 | -0.07617 | 0.892182 |
| AT1G31072 | AT1G31072 | 0        | 0        | 0        | 0        | 0        | 0        | 0        | 0          | 0        | 0        | 0        | 0         | #N/A     | #N/A     | #N/A      | #N/A     | #N/A     | #N/A     |
| AT1G31080 | AT1G31080 | 0        | 0        | 0        | 0        | 0        | 0        | 0        | 0          | 0        | 0        | 0        | 0         | #N/A     | #N/A     | #N/A      | #N/A     | #N/A     | #N/A     |
| AT1G31090 | AT1G31090 | 0        | 0        | 0        | 0        | 0        | 0        | 0        | 0          | 0        | 0        | 1.330334 | 0         | 0        | NA       | 0         | NA       | 0.172362 | NA       |
| AT1G31093 | AT1G31093 | 0        | 0        | 0        | 0        | 0        | 0        | 0        | 0          | 0        | 0        | 0        | 0         | #N/A     | #N/A     | #N/A      | #N/A     | #N/A     | #N/A     |
| AT1G31100 | AT1G31100 | 0        | 1.784246 | 0        | 0        | 0        | 0.889303 | 0        | 0          | 0        | 0        | 0        | 0         | -0.26522 | NA       | -0.08117  | NA       | -0.24296 | NA       |
| AT1G31110 | AT1G31110 | 0        | 0        | 0        | 0        | 0        | 0        | 0        | 0          | 0        | 0        | 0        | 0         | #N/A     | #N/A     | #N/A      | #N/A     | #N/A     | #N/A     |
| AT1G31120 | POT10     | 152.1797 | 135.6027 | 115.8889 | 90.31901 | 78.17114 | 94.69987 | 114.7201 | 141.3346   | 76.14719 | 141.0517 | 113.0784 | 118.0933  | -0.5978  | 0.001262 | -0.27432  | 0.326636 | -0.1093  | 0.838966 |
| AT1G31130 | AT1G31130 | 424.4387 | 394.3184 | 360.5432 | 697.3947 | 751.9004 | 751.6179 | 824.3843 | 755.223    | 999.6759 | 321.4444 | 385.7969 | 367.7468  | 0.885106 | 4.55E-10 | 1.112317  | 2.51E-15 | -0.13515 | 0.652681 |
| AT1G31140 | GOA       | 1.188904 | 0        | 0        | 0.824831 | 0        | 0        | 0        | 0          | 0.972646 | 0        | 0        | 0         | -0.04043 | NA       | -0.03795  | NA       | -0.20015 | NA       |
| AT1G31150 | AT1G31150 | 152.1797 | 144.5239 | 149.3679 | 95.268   | 109.3071 | 111.6462 | 144.0672 | 120.8357   | 85.90965 | 143.9303 | 139.6851 | 147.0987  | -0.49295 | 0.018248 | -0.33569  | 0.148728 | -0.04955 | 0.923778 |
| AT1G31160 | HINT 2    | 235.403  | 240.8732 | 294.8728 | 229.3031 | 254.3874 | 208.3397 | 285.4664 | 222.2513   | 298.7313 | 284.0225 | 203.5411 | 312.8438  | -0.15121 | 0.521373 | 0.063115  | 0.819722 | 0.056193 | 0.908715 |
| AT1G31163 | AT1G31163 | 0        | 0        | 0        | 0        | 0        | 0        | 0.889303 | 0          | 0        | 0        | 0        | 0         | 0        | NA       | 0.160764  | NA       | 0        | NA       |
| AT1G31166 | AT1G31166 | 0        | 0        | 0        | 0        | 0        | 0        | 0.889303 | 0          | 0        | 0        | 0        | 0         | 0        | NA       | 0.160764  | NA       | 0        | NA       |
| AT1G31170 | SRX       | 265.1256 | 315.8115 | 338.6531 | 420.2515 | 407.4174 | 356.869  | 389.5149 | 380.8481   | 588.6763 | 448.1031 | 619.9356 | 326.3106  | 0.353242 | 0.175961 | 0.542533  | 0.033857 | 0.575093 | 0.092778 |
| AT1G31173 | MIR167D   | 326.9486 | 342.5752 | 355.3926 | 231.3651 | 246.4378 | 235.2544 | 398.408  | 224.4091   | 190.368  | 370.3808 | 360.5205 | 394.6804  | -0.50504 | 0.033268 | -0.31863  | 0.227983 | 0.131373 | 0.788496 |
| AT1G31175 | AT1G31175 | 155.7464 | 173.0719 | 124.9025 | 130.3233 | 130.5061 | 136.5672 | 178.75   | 118.6779   | 93.71962 | 164.0806 | 190.2378 | 139.8474  | -0.1801  | 0.524735 | -0.19612  | 0.512225 | 0.120522 | 0.820897 |
| AT1G31180 | IMDH1     | 773.9765 | 738.6779 | 853.7148 | 632.6455 | 551.1728 | 653.9276 | 684.7637 | 644.0973   | 645.2986 | 996.9575 | 819.4857 | 919.885   | -0.3635  | 0.005621 | -0.25977  | 0.067787 | 0.207667 | 0.325972 |
| AT1G31190 | IMPL1     | 294.8482 | 317.5958 | 325.7765 | 198.7843 | 208.6772 | 190.3966 | 355.7214 | 319.3514   | 441.2632 | 354.0686 | 344.5565 | 412.2908  | -0.63575 | 7.23E-05 | 0.248907  | 0.174165 | 0.242389 | 0.371475 |
| AT1G31200 | PP2A9     | 30.9115  | 19.62671 | 16.73951 | 32.99325 | 47.03518 | 31.8989  | 46.24378 | 28.05114   | 45.88356 | 24.94793 | 21.28534 | 27.96948  | 0.652612 | 0.075651 | 0.751163  | 0.047948 | 0.111925 | 0.898828 |
| AT1G31210 | AT1G31210 | 0        | 0        | 0        | 0        | 0        | 0        | 1.778607 | 0          | 0        | 0        | 1.330334 | 0         | 0        | NA       | 0.264566  | NA       | 0.174671 | NA       |
| AT1G31220 | PUR3      | 91.5456  | 73.15409 | 86.27284 | 110.9398 | 133.1559 | 102.6746 | 82.70522 | 79.83786   | 97.6246  | 74.84378 | 79.82004 | 84.94434  | 0.446779 | 0.040355 | 0.038899  | 0.900812 | -0.07751 | 0.88231  |
| AT1G31230 | AHSDH1    | 829.855  | 788.6367 | 735.2506 | 433.4488 | 420.6667 | 486.4583 | 454.4341 | 515.7094   | 398.3084 | 80.404   | 888.6631 | 746.8886  | -0.80446 | 3.84E-09 | -0.779281 | 0.73E-08 | 0.10607  | 0.712267 |
| AT1G31240 | AT1G31240 | 7.133244 | 7.136984 | 3.862963 | 6.598649 | 7.28714  | 5.981045 | 5.335821 | 8.63112    | 8.786214 | 6.716749 | 13.30334 | 2.071813  | 0.104043 | 0.887181 | 0.24109   | 0.744231 | 0.174508 | NA       |
| AT1G31245 | AT1G31245 | 0        | 0        | 0        | 0        | 0        | 0        | 0        | 0          | 0        | 0        | 0        | 0         | #N/A     | #N/A     | #N/A      | #N/A     | #N/A     | #N/A     |
| AT1G31250 | AT1G31250 | 0        | 0        | 0        | 1.324935 | 0.996841 | 1.778607 | 0        | 0          | 0.959536 | 0        | 0        | 0         | 0.344503 | NA       | 0.278703  | NA       | 0.148919 | NA       |
| AT1G31258 | AT1G31258 | 17.83356 | 19.62671 | 20.60247 | 23.09527 | 18.54908 | 13.95577 | 24.01119 | 10.7889    | 33.19236 | 22.06932 | 15.96401 | 22.78994  | -0.02528 | 0.964415 | 0.212731  | 0.691888 | 0.071337 | 0.949258 |
| AT1G31260 | ZIP10     | 0        | 0        | 0        | 0        | 0        | 0        | 0        | 0          | 0        | 0        | 0        | 0         | #N/A     | #N/A     | #N/A      | #N/A     | #N/A     | #N/A     |
| AT1G31270 | AT1G31270 | 0        | 0        | 0        | 0.662467 | 0        | 0        | 0        | 0          | 0        | 0        | 0        | 0         | 0.128567 | NA       | 0         | NA       | 0        | NA       |
| AT1G31274 | AT1G31274 | 1.188904 | 0        | 0        | 0        | 0        | 0        | 0        | 0          | 0        | 0        | 0        | 0         | -0.2184  | NA       | -0.20558  | NA       | -0.19918 | NA       |
| AT1G31280 | AGO2      | 166.4466 | 198.0513 | 130.0531 | 129.9109 | 143.7554 | 172.4535 | 156.5174 | 154.2813   | 131.7932 | 112.2657 | 115.7391 | 118.0933  | -0.1462  | 0.532923 | -0.14486  | 0.566003 | -0.49018 | 0.094851 |
| AT1G31290 | AGO3      | 10.70014 | 12.48972 | 7.725926 | 24.33252 | 20.53649 | 25.91786 | 44.46517 | 40.99782   | 20.50117 | 25.90746 | 10.64267 | 17.61041  | 1.006455 | 0.021673 | 1.537717  | 0.000298 | 0.692691 | 0.338859 |
| AT1G31300 | AT1G31300 | 287.7148 | 246.226  | 302.5988 | 234.252  | 252.4    | 253.1976 | 297.9167 | 228.7247   | 273.3489 | 352.1496 | 384.4665 | 304.5565  | -0.18312 | 0.317638 | -0.06641  | 0.766828 | 0.301839 | 0.236744 |
| AT1G31310 | AT1G31310 | 58.25629 | 60.66437 | 46.35556 | 39.17948 | 36.4357  | 27.91154 | 40.01866 | 39.91893   | 31.23987 | 49.89585 | 65.18636 | 46.61579  | -0.60733 | 0.032585 | -0.53401  | 0.0857   | -0.03388 | 0.96434  |
| AT1G31319 | AT1G31319 | 0        | 1.784246 | 0        | 0        | 0        | 0        | 0        | 0          | 0        | 0        | 0        | 0         | -0.2184  | NA       | -0.20558  | NA       | -0.19918 | NA       |
| AT1G31320 | LBD4      | 19.02246 | 17.84246 | 16.73951 | 39.17948 | 29.14856 | 27.91154 | 26.6791  | 17.26224   | 24.25366 | 22.06932 | 23.94601 | 21.75404  | 0.792415 | 0.030302 | 0.278316  | 0.55511  | 0.292016 | 0.697022 |
| AT1G31330 | PSAF      | 381.3172 | 383.3453 | 367.0587 | 15310.1  | 17970.09 | 13343.71 | 17318.3  | 14940.47</ |          |          |          |           |          |          |           |          |          |          |

|           |           |          |          |           |          |          |          |          |          |          |          |          |          |           |          |           |          |          |          |
|-----------|-----------|----------|----------|-----------|----------|----------|----------|----------|----------|----------|----------|----------|----------|-----------|----------|-----------|----------|----------|----------|
| AT1G31790 | PCMP-A1   | 36.85602 | 32.11643 | 28.3284   | 49.07745 | 63.59686 | 61.80413 | 68.47637 | 88.46897 | 76.14719 | 30.70514 | 46.56169 | 39.36445 | 0.77297   | 0.00674  | 1.183796  | 2.02E-05 | 0.218503 | 0.720756 |
| AT1G31800 | CYP97A3   | 840.5551 | 934.9449 | 930.9741  | 630.171  | 589.5959 | 603.0887 | 1051.157 | 1178.148 | 1051.417 | 1015.189 | 1066.928 | 1092.881 | -0.56264  | 9.8E-08  | 0.276581  | 0.015647 | 0.230008 | 0.162766 |
| AT1G31810 | FH14      | 278.2035 | 183.7773 | 190.5728  | 171.5649 | 195.4278 | 135.5703 | 194.7575 | 190.9635 | 152.2944 | 177.5141 | 220.8354 | 239.2944 | -0.36544  | 0.119321 | -0.27638  | 0.283442 | -0.04108 | 0.943411 |
| AT1G31812 | ACBP6     | 1152.048 | 1222.209 | 1357.188  | 1505.317 | 1486.577 | 1050.67  | 991.5734 | 725.014  | 1835.342 | 1445.061 | 1535.205 | 1651.235 | 0.110716  | 0.745455 | -0.06751  | 0.857518 | 0.296711 | 0.540551 |
| AT1G31814 | FLD2      | 67.76752 | 64.23286 | 70.82099  | 51.96436 | 75.52127 | 71.77254 | 88.04104 | 69.04896 | 49.78855 | 75.80331 | 62.5257  | 73.54936 | -0.0434   | 0.904135 | 0.027833  | 0.94306  | 0.0624   | 0.927039 |
| AT1G31817 | NRD3      | 189.0357 | 149.8767 | 202.1617  | 234.6645 | 204.7024 | 196.3764 | 172.5249 | 159.6757 | 227.4653 | 184.2308 | 170.2827 | 217.5404 | 0.22375   | 0.307433 | 0.039495  | 0.88951  | 0.072363 | 0.878139 |
| AT1G31820 | AT1G31820 | 134.3461 | 99.91778 | 109.4506  | 107.228  | 110.632  | 133.5767 | 144.9565 | 130.5457 | 164.9856 | 113.2252 | 119.7301 | 133.7756 | 0.00655   | 0.981235 | 0.338551  | 0.132657 | 0.09474  | 0.840064 |
| AT1G31830 | AT1G31830 | 170.0133 | 155.2294 | 159.6691  | 181.8753 | 180.8536 | 199.3682 | 200.0933 | 217.9358 | 143.5082 | 162.1615 | 175.6041 | 137.6319 | 0.202594  | 0.359395 | 0.20229   | 0.390509 | -0.04661 | 0.926293 |
| AT1G31835 | AT1G31835 | 17.83356 | 17.84246 | 16.73951  | 17.32145 | 16.56168 | 16.94629 | 23.12189 | 15.10446 | 37.09735 | 19.19071 | 22.61568 | 22.78994 | -0.04427  | 0.935767 | 0.474179  | 0.300394 | 0.261601 | 0.75309  |
| AT1G31840 | AT1G31840 | 14.26685 | 12.48972 | 17.725926 | 10.7228  | 6.24673  | 3.987363 | 22.23259 | 11.86779 | 10.73871 | 10.55489 | 11.97301 | 13.46678 | -0.49828  | 0.364005 | 0.334731  | 0.577556 | 0.051986 | NA       |
| AT1G31850 | AT1G31850 | 488.6395 | 380.0444 | 369.5568  | 366.225  | 337.8583 | 433.6257 | 508.6816 | 523.2616 | 446.1444 | 379.0166 | 364.5115 | 397.7881 | -0.12899  | 0.469826 | 0.246999  | 0.174351 | -0.11868 | 0.719342 |
| AT1G31860 | HISN2     | 179.5245 | 176.6404 | 213.7506  | 193.0105 | 178.2037 | 200.365  | 158.296  | 145.6501 | 184.5105 | 206.3002 | 180.9254 | 206.1454 | -0.00132  | 0.995935 | -0.22049  | 0.26916  | 0.057575 | 0.886382 |
| AT1G31870 | AT1G31870 | 175.9578 | 169.5034 | 189.8528  | 216.1058 | 210.6646 | 181.425  | 198.3147 | 211.4624 | 214.7741 | 134.335  | 138.3547 | 166.781  | 0.188095  | 0.306717 | 0.21615   | 0.263893 | -0.27904 | 0.321328 |
| AT1G31875 | AT1G31875 | 0        | 0        | 0         | 0        | 0        | 0        | 0        | 0        | 0        | 0        | 0        | 0        | #N/A      | #N/A     | #N/A      | #N/A     | #N/A     | #N/A     |
| AT1G31880 | BRX       | 26.15589 | 12.48972 | 18.02716  | 15.25938 | 9.274542 | 14.95261 | 10.67164 | 9.710009 | 20.50117 | 11.51443 | 10.64267 | 14.50269 | -0.47417  | 0.325491 | -0.42941  | 0.41833  | -0.55643 | NA       |
| AT1G31885 | NIP3-1    | 1.188904 | 1.784246 | 2.575309  | 4.948987 | 3.974804 | 3.987363 | 0        | 3.23667  | 0        | 1.919071 | 0        | 1.035907 | 0.749843  | 0.277954 | -0.34211  | 0.670377 | -0.31277 | NA       |
| AT1G31900 | AT1G31900 | 7.133424 | 0        | 3.862963  | 1.237247 | 4.637271 | 3.987363 | 5.335821 | 6.47334  | 0.976246 | 2.878607 | 5.321336 | 1.035907 | -0.18155  | 0.822627 | 0.077625  | 0.93059  | -0.21306 | NA       |
| AT1G31910 | AT1G31910 | 1608.587 | 1736.071 | 1756.361  | 1471.911 | 1350.108 | 1603.917 | 1550.945 | 1730.539 | 1243.737 | 1463.292 | 1411.484 | 1465.808 | -0.20262  | 0.183636 | -0.17052  | 0.297617 | -0.22927 | 0.312395 |
| AT1G31920 | PCMP-H1   | 296.0371 | 289.0479 | 280.7086  | 129.4985 | 110.632  | 138.5609 | 147.6244 | 142.4135 | 124.9595 | 317.6063 | 351.2082 | 310.772  | -1.17913  | 6.72E-16 | -1.04233  | 6.44E-12 | 0.173524 | 0.527151 |
| AT1G31930 | XLG3      | 508.8509 | 531.7053 | 472.5691  | 303.9503 | 251.7376 | 320.9827 | 345.9391 | 393.7948 | 285.0638 | 411.6408 | 532.1336 | 423.6858 | -0.77261  | 3.37E-06 | -0.55083  | 0.001689 | -0.14506 | 0.66497  |
| AT1G31935 | AT1G31935 | 7.133424 | 1.784246 | 9.01358   | 10.31039 | 9.937009 | 8.971567 | 8.007331 | 3.23667  | 18.54867 | 14.39303 | 17.29434 | 12.43968 | 0.463998  | 0.444335 | 0.486829  | 0.449174 | 0.933202 | NA       |
| AT1G31940 | AT1G31940 | 173.58   | 215.8898 | 229.2025  | 316.7352 | 319.9717 | 298.5514 | 324.9528 | 238.4347 | 297.755  | 199.5834 | 271.3881 | 213.3987 | 0.587516  | 0.001336 | 0.471617  | 0.015527 | 0.193106 | 0.716027 |
| AT1G31950 | TPS29     | 11.88904 | 26.76369 | 24.46543  | 18.5587  | 20.53649 | 15.94945 | 13.33955 | 20.49891 | 18.54867 | 35.50282 | 23.94601 | 22.78994 | -0.13887  | 0.779704 | -0.21815  | 0.672774 | 0.385745 | 0.593644 |
| AT1G31960 | AT1G31960 | 0        | 0        | 0         | 0        | 0        | 0        | 0        | 1.07889  | 0        | 0        | 0        | 0        | 0         | NA       | 0         | 0        | 0        | 0        |
| AT1G31970 | RHS       | 928.534  | 835.0271 | 867.879   | 736.5742 | 830.734  | 763.58   | 760.3545 | 689.4107 | 880.5739 | 701.4205 | 730.3533 | 827.6893 | -0.17478  | 0.241027 | -0.17407  | 0.268106 | -0.21844 | 0.32315  |
| AT1G31980 | AT1G31983 | 1.188904 | 0        | 0         | 0.412416 | 1.987402 | 0.996841 | 1.778607 | 1.07889  | 2.928738 | 1.919071 | 1.330334 | 3.10772  | 0.247712  | 0.748097 | 0.626259  | 0.382853 | 0.693431 | NA       |
| AT1G31990 | AT1G31990 | 1.188904 | 0        | 3.862963  | 1.237247 | 0.662467 | 1.993682 | 1.778607 | 1.07889  | 0        | 0.959536 | 3.991002 | 4.143622 | -0.37021  | 0.272862 | -0.37651  | 0.671236 | 0.380334 | NA       |
| AT1G31993 | AT1G31993 | 1.188904 | 1.784246 | 0         | 0        | 0        | 0        | 0        | 0        | 0        | 0        | 0        | 0        | -0.49674  | NA       | -0.47297  | NA       | -0.46632 | NA       |
| AT1G32000 | AT1G32000 | 0        | 0        | 0         | 0        | 0        | 0        | 0        | 0        | 0        | 0        | 0        | 0        | #N/A      | #N/A     | #N/A      | #N/A     | #N/A     | #N/A     |
| AT1G32010 | AT1G32010 | 0        | 0        | 0         | 0        | 0.662467 | 0        | 0        | 0        | 0        | 0        | 0        | 0        | 0.128567  | NA       | 0         | NA       | 0        | NA       |
| AT1G32020 | AT1G32020 | 0        | 0        | 0         | 0        | 0        | 0        | 0        | 0        | 0        | 0        | 0        | 0        | #N/A      | #N/A     | #N/A      | #N/A     | #N/A     | #N/A     |
| AT1G32030 | AT1G32030 | 0        | 0        | 0         | 0        | 0        | 0        | 0        | 2.15778  | 0        | 0        | 1.330334 | 0        | 0         | NA       | 0.298225  | NA       | 0.175071 | NA       |
| AT1G32040 | AT1G32040 | 0        | 0        | 0         | 0        | 0        | 0.889303 | 0        | 0        | 0        | 0        | 0        | 2.071813 | 0         | NA       | 0.133076  | NA       | 0.29577  | NA       |
| AT1G32045 | AT1G32045 | 0        | 0        | 0         | 0        | 0.662467 | 0        | 0        | 0        | 0        | 0        | 0        | 0        | 0.128567  | NA       | 0         | NA       | 0        | NA       |
| AT1G32049 | AT1G32049 | 0        | 0        | 0         | 0        | 0        | 0        | 0        | 0        | 0        | 0        | 0        | 0        | #N/A      | #N/A     | #N/A      | #N/A     | #N/A     | #N/A     |
| AT1G32050 | SCAMP4    | 1197.226 | 1132.996 | 1191.08   | 1338.701 | 1403.106 | 1354.707 | 1317.948 | 1163.043 | 1501.466 | 1296.333 | 1089.544 | 1214.082 | 0.215115  | 0.111956 | 0.17533   | 0.230485 | 0.032095 | 0.920201 |
| AT1G32060 | PRK       | 13136.2  | 13233.75 | 12168.33  | 6015.494 | 6512.053 | 5841.487 | 8919.714 | 9251.481 | 11041.34 | 13103.42 | 16697.02 | 12131.5  | -1.05387  | 1.34E-14 | -0.39407  | 0.009239 | 0.119938 | 0.767985 |
| AT1G32070 | NSI       | 803.6991 | 929.5922 | 763.579   | 697.807  | 767.996  | 629.0065 | 785.255  | 658.1229 | 938.1724 | 881.8132 | 796.87   | 927.1363 | -0.24552  | 0.158255 | -0.06419  | 0.770474 | 0.062708 | 0.865217 |
| AT1G32080 | PLGG1     | 4003.04  | 3823.639 | 3750.937  | 1197.242 | 1309.698 | 1323.805 | 2961.381 | 2980.973 | 2597.791 | 4167.263 | 3659.749 | 3912.613 | -1.58526  | 4.85E-59 | -0.43593  | 3.11E-05 | 0.020243 | 0.942165 |
| AT1G32090 | AT1G32090 | 230.6474 | 198.0513 | 177.6963  | 173.2145 | 160.9795 | 192.3903 | 291.6915 | 294.537  | 199.1542 | 193.8262 | 214.1838 | 174.0323 | -0.205    | 0.363914 | -0.361571 | 0.095728 | -0.06286 | 0.895333 |
| AT1G32100 | PRR1      | 58.25629 | 78.50683 | 90.1358   | 72.17273 | 39.74804 | 55.82308 | 43.57587 | 31.28781 | 11.3061  | 111.3061 | 135.6941 | 103.5907 | -0.3937   | 0.196599 | -0.300333 | 0.000728 | 0.060716 | 0.140257 |
| AT1G32110 | AT1G32110 | 0        | 0        | 1.287654  | 0        | 0        | 0        | 0        | 0        | 0.976246 | 0        | 0        | 0        | -0.22097  | NA       | -0.03908  | NA       | -0.20203 | NA       |
| AT1G32120 | AT1G32120 | 177.1467 | 101.702  | 117.1765  | 127.8488 | 147.0677 | 147.5324 | 124.5025 | 146.729  | 158.1519 | 148.728  | 152.9884 | 147.0987 | 0.068073  | 0.805884 | 0.094588  | 0.744083 | 0.157498 | 0.71872  |
| AT1G32130 | IWS1      | 839.3662 | 658.3868 | 685.0321  | 760.8189 | 812.1849 | 799.4663 | 747.9042 | 787.5897 | 858.1202 | 580.5191 | 465.6169 | 661.9443 | 0.114676  | 0.538118 | 0.128072  | 0.509737 | -0.3476  | 0.136881 |
| AT1G32140 | AT1G32140 | 0        | 0        | 0         | 0        | 0        | 0        | 0        | 1.07889  | 0        | 0.959536 | 0        | 0        | 0         | NA       | 0.156853  | NA       | 0.149599 | NA       |
| AT1G32150 | bZIP68    | 101.0568 | 101.702  | 106.8753  | 192.5981 | 187.4782 | 156.504  | 159.1853 | 171.5435 | 180.6055 | 111.3061 | 133.0334 | 130.5242 | 0.784368  | 0.00001  | 0.704243  | 0.00015  | 0.261559 | 0.433665 |
| AT1G32160 | AT1G32160 | 101.0568 | 1223.993 | 1185.93   | 727.5011 | 790.3235 | 772.5516 | 1115.187 | 988.2632 | 963.5488 | 1227.246 | 1116.15  | 1213.047 | -0.57194  | 1.25E-06 | -0.15296  | 0.283634 | 0.058888 | 0.83221  |
| AT1G32170 | XTH30     | 55.87849 | 44.60615 | 56.65679  | 98.15491 | 86.78321 | 120.6177 | 99.60199 | 133.7824 | 180.6055 | 57.77446 | 86.47171 | 71.47755 | 0.885008  | 0.001569 | 1.309423  | 1.49E-06 | 0.371584 | 0.468917 |
| AT1G32172 | AT1G32172 | 7.133424 | 3.568492 | 3.862963  | 11.96005 | 10.59948 | 12.95893 | 9.557214 | 4.31556  | 1.952492 | 0.959536 | 1.330334 | 1.035907 | -0.046733 | 0.068119 | -0.04266  | 0.574022 | -1.12494 | NA       |
| AT1G32180 | CSLD6     | 0        | 0        | 0         | 0.412416 | 0        | 0        | 0        | 1.07889  | 0        | 0        | 0        | 0        | 0.064603  | 0        | 0.150774  | NA       | 0        | NA       |
| AT1G32190 | AT1G32190 | 32.10041 | 44.60615 | 32.19136  | 39.17948 | 43.06037 | 39.87363 | 32.01493 | 29.13003 | 27.33489 | 27.82653 | 19.95501 | 31.0772  | -0.181378 | 0.611469 | -0.25529  | 0.507428 | -0.39363 | 0.486936 |
| AT1G32200 | ATS1      | 913.0782 | 870.7121 | 791.9074  | 441.6971 | 441.8657 | 505.3983 | 642.0771 | 576.1272 | 581.8426 | 996.9575 | 985.7775 | 934.3877 | -0.88767  | 2.2E-15  | -0.51106  | 1.41E-05 | 0.178047 | 0.366371 |
| AT1G32210 | DAD1      | 235.403  | 248.0102 | 252.3803  | 461.493  | 561.7722 | 425.651  | 321.0386 | 255.6969 | 520.3391 | 216.8551 | 183.5861 | 358.4237 | 0.929141  | 0.000603 | 0.546933  | 0.066654 | 0.044512 | 0.952356 |
| AT1G32220 | AT1G32220 | 808.4547 | 804.695  | 916.8099  | 410.3535 | 423      |          |          |          |          |          |          |          |           |          |           |          |          |          |

|           |           |          |          |          |          |          |          |          |          |            |          |          |          |          |           |          |          |          |          |
|-----------|-----------|----------|----------|----------|----------|----------|----------|----------|----------|------------|----------|----------|----------|----------|-----------|----------|----------|----------|----------|
| AT1G32640 | MYC2      | 441.0834 | 406.8081 | 379.858  | 562.9473 | 578.3339 | 895.163  | 1180.995 | 1202.962 | 1072.894   | 519.1088 | 525.4819 | 388.4649 | 0.704965 | 0.000344  | 1.453879 | 6.12E-15 | 0.214969 | 0.563333 |
| AT1G32650 | AT1G32650 | 0        | 0        | 0        | 0        | 0        | 0        | 0        | 0        | 0          | 0        | 0        | 0        | #N/A     | #N/A      | #N/A     | #N/A     | #N/A     | #N/A     |
| AT1G32660 | AT1G32660 | 1.188904 | 0        | 0        | 0        | 0        | 0        | 0        | 0        | 0          | 0        | 1.330334 | 0        | -0.22006 | NA        | -0.20393 | NA       | 0.001199 | NA       |
| AT1G32670 | AT1G32670 | 0        | 0        | 0        | 0        | 0        | 0        | 0        | 0        | 0          | 0        | 0        | 0        | #N/A     | #N/A      | #N/A     | #N/A     | #N/A     | #N/A     |
| AT1G32680 | AT1G32680 | 0        | 0        | 0        | 0        | 0        | 0        | 0        | 0        | 0          | 0        | 0        | 0        | #N/A     | #N/A      | #N/A     | #N/A     | #N/A     | #N/A     |
| AT1G32690 | AT1G32690 | 4.755616 | 1.784246 | 7.725926 | 28.04426 | 26.49869 | 18.93997 | 25.7898  | 15.10446 | 22.45366   | 8.635821 | 5.321336 | 8.287252 | 1.869476 | 4.01E-05  | 1.650242 | 0.000538 | 0.382623 | NA       |
| AT1G32700 | AT1G32700 | 562.3516 | 640.5443 | 690.1827 | 1466.55  | 1436.892 | 1296.89  | 1290.379 | 982.8687 | 973.3173   | 521.0278 | 733.014  | 581.1436 | 1.129171 | 2.47E-12  | 0.764189 | 5.16E-06 | -0.04635 | 0.914481 |
| AT1G32710 | AT1G32710 | 0        | 0        | 0        | 0        | 0        | 0        | 0.889303 | 0        | 0          | 0        | 0        | 0        | 0        | NA        | 0        | NA       | 0        | NA       |
| AT1G32713 | MIR829A   | 0        | 0        | 0        | 0        | 0        | 0        | 0        | 0        | 0          | 0        | 0        | 0        | #N/A     | #N/A      | #N/A     | #N/A     | #N/A     | #N/A     |
| AT1G32720 | AT1G32720 | 0        | 0        | 0        | 0        | 0.662467 | 0        | 0        | 0        | 0.976246   | 0        | 0        | 0        | 0.097788 | NA        | 0.140077 | NA       | 0        | NA       |
| AT1G32730 | AT1G32730 | 87.97889 | 57.09587 | 74.68395 | 79.18379 | 84.79581 | 68.78201 | 81.81592 | 65.81229 | 80.05217   | 79.64146 | 57.20436 | 85.98024 | 0.068668 | 0.827713  | 0.033687 | 0.92418  | 0.012098 | 0.987026 |
| AT1G32740 | AT1G32740 | 19.02246 | 26.76369 | 20.60247 | 18.5587  | 19.87402 | 11.96209 | 9.782338 | 14.02557 | 8.786214   | 25.90746 | 30.59768 | 20.71813 | -0.30427 | 0.494874  | -0.8844  | 0.04311  | 0.212777 | 0.794763 |
| AT1G32750 | TAF1      | 661.0306 | 497.8046 | 463.5556 | 333.2318 | 350.4452 | 362.85   | 385.0684 | 472.5538 | 470.5506   | 450.9817 | 461.6259 | 417.4703 | -0.62689 | 8.64E-05  | -0.28808 | 0.111634 | -0.28551 | 0.275181 |
| AT1G32760 | AT1G32760 | 38.04493 | 24.97944 | 23.17778 | 13.60971 | 6.624673 | 10.96525 | 14.22886 | 10.7889  | 12.6912    | 12.47396 | 19.95501 | 24.86176 | -1.27813 | 0.00163   | -1.05166 | 0.015697 | -0.54299 | 0.441256 |
| AT1G32763 | AT1G32763 | 0        | 0        | 0        | 0        | 0        | 0        | 0        | 0        | 0          | 0        | 0        | 0        | #N/A     | #N/A      | #N/A     | #N/A     | #N/A     | #N/A     |
| AT1G32770 | NAC012    | 1.188904 | 0        | 0        | 0        | 0        | 0        | 0.889303 | 1.07889  | 0          | 0        | 0        | 0        | -0.26887 | NA        | 0.130815 | NA       | -0.23129 | NA       |
| AT1G32780 | AT1G32780 | 38.04493 | 39.25341 | 45.0679  | 14.02213 | 11.26194 | 12.95893 | 13.39355 | 12.96668 | 8.786214   | 48.93632 | 34.58868 | 58.01077 | -1.53028 | 3.48E-06  | -1.6239  | 4.85E-06 | 0.216238 | 0.742272 |
| AT1G32790 | CID11     | 741.8761 | 870.7121 | 804.784  | 1049.185 | 959.9151 | 946.9987 | 893.75   | 994.7365 | 1025.058   | 652.4842 | 553.4189 | 770.7145 | 0.28972  | 0.055904  | 0.267424 | 0.094429 | -0.28155 | 0.216277 |
| AT1G32810 | AT1G32810 | 379.2604 | 360.4177 | 311.6124 | 261.8839 | 221.2641 | 280.1123 | 293.4701 | 365.7437 | 247.9665   | 307.0514 | 403.0912 | 268.2998 | -0.45116 | 0.029807  | -0.20809 | 0.391128 | -0.1047  | 0.812937 |
| AT1G32820 | AT1G32820 | 1.188904 | 0        | 0        | 0        | 0        | 0        | 0        | 0        | 0          | 0        | 0        | 0        | -0.2184  | NA        | -0.20558 | NA       | -0.19918 | NA       |
| AT1G32830 | AT1G32830 | 0        | 0        | 0        | 0.662467 | 0.996841 | 0        | 0        | 0        | 0          | 0        | 0        | 0        | 0.262313 | NA        | 0        | NA       | 0        | NA       |
| AT1G32840 | AT1G32840 | 1.188904 | 0        | 0        | 0        | 0        | 0        | 0.889303 | 0        | 0.976246   | 0        | 0        | 0        | -0.26727 | NA        | 0.121982 | NA       | -0.23048 | NA       |
| AT1G32850 | UBP11     | 3.566712 | 0        | 0        | 0        | 1.987402 | 0        | 1.778607 | 0        | 0.976246   | 0.959536 | 2.660668 | 1.035907 | -0.26707 | 0.706541  | -0.12426 | 0.874934 | 0.083225 | NA       |
| AT1G32860 | AT1G32860 | 51.12287 | 35.68492 | 47.64321 | 28.86909 | 31.79843 | 22.92734 | 44.46517 | 34.52448 | 17.57243   | 59.49121 | 47.89202 | 35.22082 | -0.63125 | 0.07736   | -0.44624 | 0.262566 | 0.069555 | 0.936155 |
| AT1G32870 | NAC13     | 101.0568 | 67.80135 | 104.3    | 143.1082 | 139.1181 | 150.523  | 174.3035 | 155.3602 | 144.4844   | 82.52006 | 101.1054 | 69.40574 | 0.621884 | 0.00288   | 0.753697 | 0.000339 | -0.13846 | 0.768141 |
| AT1G32880 | AT1G32880 | 0        | 1.784246 | 0        | 0.412416 | 3.974804 | 4.984204 | 0.889303 | 2.15778  | 2.928738   | 0        | 0        | 1.035907 | 0.88682  | 0.171628  | 0.561142 | 0.433139 | -0.11157 | NA       |
| AT1G32890 | AT1G32890 | 0        | 0        | 0        | 0        | 0.662467 | 0.996841 | 1.778607 | 1.07889  | 1.952492   | 0        | 0        | 0        | 0.257759 | NA        | 0.815152 | NA       | 0        | NA       |
| AT1G32900 | GBS51     | 356.1957 | 444.2773 | 400.4605 | 198.3719 | 173.5664 | 165.4756 | 92.48756 | 91.70564 | 49.78855   | 410.6812 | 435.0192 | 374.9982 | -1.32185 | 1.79E-12  | -2.48039 | 2.13E-36 | -0.17548 | 0.642572 |
| AT1G32910 | AT1G32910 | 0        | 0        | 0        | 1.649662 | 1.993682 | 4.646517 | 2.15778  | 0.976246 | 0          | 0        | 0        | 0        | 0.708138 | 0.259883  | 1.104075 | 0.070503 | 0        | NA       |
| AT1G32920 | AT1G32920 | 27.34479 | 17.84246 | 36.05432 | 200.0216 | 227.2263 | 231.2671 | 356.6107 | 258.9336 | 768.3056   | 47.01725 | 95.78405 | 68.36983 | 2.512656 | 1.53E-09  | 3.460063 | 2.05E-17 | 1.089495 | 0.081037 |
| AT1G32928 | AT1G32928 | 8.322328 | 3.568492 | 12.87654 | 42.06639 | 58.29712 | 68.78201 | 69.36567 | 66.89118 | 205.0117   | 12.47396 | 7.982004 | 19.68222 | 2.180513 | 8.89E-07  | 3.094443 | 7.6E-13  | 0.449945 | 0.625371 |
| AT1G32930 | B3GALT6   | 85.60108 | 53.52738 | 68.24568 | 93.61834 | 105.9948 | 85.72831 | 102.2699 | 88.46887 | 69.31347   | 77.72239 | 81.15037 | 92.19568 | 0.426518 | 0.089463  | 0.294506 | 3.000118 | 0.24368  | 0.595754 |
| AT1G32940 | SBT3.5    | 9.05657  | 10.62333 | 92.71111 | 221.8796 | 150.3801 | 176.4408 | 221.4366 | 224.4091 | 124.9551   | 72.92471 | 73.16837 | 77.69299 | 0.875907 | 0.000442  | 0.924663 | 0.00026  | -0.36508 | 0.426098 |
| AT1G32950 | AT1G32950 | 5.94452  | 1.784246 | 1.287654 | 16.49662 | 14.57428 | 18.93997 | 16.18335 | 13.66744 | 9.479768   | 6.65167  | 20.71813 | 0.718139 | 1.777064 | 0.0000436 | 1.683545 | 0.001349 | 0.231975 | NA       |
| AT1G32960 | SBT3.3    | 10.70014 | 10.70548 | 10.30123 | 70.11065 | 70.22153 | 83.73463 | 93.37687 | 76.60119 | 57.59851   | 2.878607 | 9.312338 | 6.215439 | 2.544079 | 1.02E-13  | 2.56997  | 1E-13    | -0.64938 | 0.390087 |
| AT1G32970 | AT1G32970 | 0        | 0        | 0        | 0        | 0        | 0        | 0        | 1.07889  | 0          | 0        | 0        | 0        | 0        | NA        | 0.16673  | NA       | 0        | NA       |
| AT1G32975 | AT1G32975 | 0        | 0        | 0        | 0        | 0        | 0        | 0        | 0        | 0          | 0        | 0        | 0        | #N/A     | #N/A      | #N/A     | #N/A     | #N/A     | #N/A     |
| AT1G32980 | AT1G32980 | 1.188904 | 0        | 0        | 0        | 0        | 0        | 0        | 0        | 0          | 0        | 0        | 1.035907 | -0.21339 | NA        | -0.19896 | NA       | -0.02174 | NA       |
| AT1G32990 | RPL11     | 1967.636 | 2064.373 | 2119.479 | 1586.975 | 1701.216 | 1436.448 | 1534.938 | 1495.341 | 2057.927   | 2835.509 | 4239.774 | 2254.133 | -0.36879 | 0.104916  | -0.26535 | 0.285364 | 0.581996 | 0.041747 |
| AT1G32992 | MIR856A   | 0        | 0        | 0        | 0        | 0        | 0        | 0        | 0        | 0          | 0        | 0        | 0        | #N/A     | #N/A      | #N/A     | #N/A     | #N/A     | #N/A     |
| AT1G33000 | AT1G33000 | 0        | 0        | 0        | 0.412416 | 0        | 0        | 0.889303 | 0        | 0          | 0        | 0        | 0        | 0.066991 | NA        | 0.136991 | NA       | 0        | NA       |
| AT1G33010 | AT1G33010 | 0        | 0        | 0        | 0        | 0.662467 | 0.996841 | 0        | 0        | 0          | 0        | 0        | 0        | 0.262313 | NA        | 0        | NA       | 0        | NA       |
| AT1G33020 | AT1G33020 | 0        | 0        | 0        | 0        | 0        | 0        | 0        | 0        | 0          | 0        | 0        | 0        | #N/A     | #N/A      | #N/A     | #N/A     | #N/A     | #N/A     |
| AT1G33030 | AT1G33030 | 4.755616 | 1.736984 | 7.725926 | 105.9908 | 135.1433 | 102.6746 | 156.5174 | 155.3602 | 150.3419   | 4.797678 | 5.321336 | 3.10772  | 3.66942  | 7.24E-27  | 4.081354 | 4.47E-33 | -0.41522 | 0.644483 |
| AT1G33040 | NAC45     | 787.0544 | 644.1128 | 688.8951 | 723.3769 | 686.3161 | 585.1455 | 533.5821 | 484.4216 | 983.0797   | 833.8365 | 929.9034 | 805.9353 | -0.08446 | 0.7798    | -0.08115 | 0.801605 | 0.26595  | 0.52809  |
| AT1G33050 | AT1G33050 | 1067.636 | 1427.397 | 1137.152 | 984.8484 | 937.3912 | 1153.345 | 1405.1   | 1383.137 | 895.2176   | 897.1658 | 933.8944 | 966.5008 | -0.22035 | 0.301621  | 0.03477  | 0.898075 | -0.35265 | 0.236117 |
| AT1G33055 | AT1G33055 | 13.07794 | 1.736984 | 9.01358  | 2.886909 | 6.624673 | 1.993682 | 11.56095 | 10.7889  | 7.809968   | 10.55489 | 13.30334 | 23.82585 | -1.03809 | 0.054674  | 0.017711 | 0.980616 | 0.572161 | NA       |
| AT1G33060 | NAC014    | 205.6804 | 181.9931 | 164.8198 | 197.5471 | 234.5134 | 222.2955 | 246.3371 | 203.9102 | 183.5342   | 151.6066 | 176.9344 | 195.7863 | 0.232981 | 0.253414  | 0.193518 | 0.388147 | -0.0777  | 0.860356 |
| AT1G33070 | AT1G33070 | 0        | 0        | 0        | 0        | 0        | 0        | 0        | 0        | 0          | 0        | 0        | 0        | #N/A     | #N/A      | #N/A     | #N/A     | #N/A     | #N/A     |
| AT1G33080 | AT1G33080 | 61.82301 | 51.74313 | 75.97161 | 30.93117 | 42.39791 | 39.37363 | 56.02612 | 58.26006 | 44.90732   | 57.57214 | 49.22236 | 84.94434 | -0.73093 | 0.011115  | -0.24903 | 0.47577  | 0.014402 | 0.986628 |
| AT1G33090 | AT1G33090 | 0        | 0        | 0        | 0        | 1.993682 | 0.889303 | 1.07889  | 0        | 2.660668   | 0        | 0        | 0        | 0.244328 | NA        | 0.274641 | NA       | 0.33699  | NA       |
| AT1G33100 | AT1G33100 | 4.755616 | 1.736984 | 3.862963 | 5.361402 | 2.649869 | 3.987363 | 2.66791  | 3.23667  | 3.904984   | 0        | 1.330334 | 3.10772  | -0.19011 | 0.805908  | -0.41556 | 0.586314 | -0.99129 | NA       |
| AT1G33102 | AT1G33102 | 9.511232 | 1.736984 | 5.150617 | 14.43455 | 15.89921 | 12.95893 | 6.225124 | 10.7889  | 16.59618   | 17.27164 | 5.321336 | 12.43088 | 0.786005 | 0.133529  | 0.489494 | 0.454917 | 0.546854 | NA       |
| AT1G33110 | AT1G33110 | 341.2154 | 369.3389 | 359.2556 | 508.9208 | 503.4751 | 515.3667 | 492.6741 | 461.7649 | 336.8049   | 313.7682 | 317.9498 | 279.6948 | 0.507273 | 0.00142   | 0.268865 | 0.136459 | -0.22638 | 0.424257 |
| AT1G33120 | RPL9B     | 2501.454 | 2633.547 | 2950.016 | 3917.123 | 3707.829 | 3172.944 | 2667.91  | 2637.886 | 4095.352   | 2941.936 | 3140.919 | 3201.987 | 0.408987 | 0.026585  | 0.212928 | 0.310591 | 0.195257 | 0.55204  |
| AT1G33130 | AT1G33130 | 0        | 1.784246 | 0        | 0        | 0        | 0        | 0        | 0.889303 | 0          | 0.976246 | 0        | 0        | -0.31542 | NA        | 0.08696  | NA       | -0.27406 | NA       |
| AT1G33135 | AT1G33135 | 0        | 0        | 0        | 0        | 0        | 0        | 0        | 0        | 0          | 0        | 0        | 0        | #N/A     | #N/A      | #N/A     | #N/A     | #N/A     | #N/A     |
| AT1G33140 | RPL9B     | 3473.977 | 3663.057 | 4103.754 | 5515.233 | 5419.645 | 4408.03  | 3487.848 | 3536.601 | 5294.182</ |          |          |          |          |           |          |          |          |          |

|           |           |          |          |          |          |          |          |          |          |          |          |          |          |          |          |           |          |          |          |
|-----------|-----------|----------|----------|----------|----------|----------|----------|----------|----------|----------|----------|----------|----------|----------|----------|-----------|----------|----------|----------|
| AT1G33610 | AT1G33610 | 57.06739 | 66.0171  | 52.79383 | 108.0529 | 126.5312 | 125.6019 | 98.71269 | 99.25787 | 99.57709 | 26.867   | 31.92802 | 36.25673 | 1.00991  | 2.24E-06 | 0.746021  | 0.001209 | -0.83067 | 0.01323  |
| AT1G33611 | AT1G33611 | 8.322328 | 3.568492 | 6.438272 | 2.474493 | 4.637271 | 0.996841 | 1.778607 | 4.31556  | 3.904984 | 6.716749 | 2.660668 | 7.251346 | -0.78768 | 0.219558 | -0.62039  | 0.379587 | -0.0934  | NA       |
| AT1G33612 | AT1G33612 | 9.511232 | 5.352738 | 6.438272 | 2.062078 | 4.637271 | 0.996841 | 1.778607 | 4.31556  | 3.904984 | 6.716749 | 2.660668 | 7.251346 | -0.78768 | 0.219558 | -0.62039  | 0.379587 | -0.0934  | NA       |
| AT1G33613 | AT1G33613 | 9.511232 | 5.352738 | 6.438272 | 2.062078 | 4.637271 | 0.996841 | 1.778607 | 4.31556  | 3.904984 | 6.716749 | 2.660668 | 7.251346 | -0.78768 | 0.219558 | -0.62039  | 0.379587 | -0.0934  | NA       |
| AT1G33614 | AT1G33614 | 1.188904 | 1.784246 | 5.150617 | 0.824831 | 0        | 0        | 0.889303 | 1.07889  | 1.952492 | 1.919071 | 1.330334 | 1.035907 | -1.07831 | 0.095988 | -0.48641  | 0.519741 | -0.42878 | NA       |
| AT1G33660 | AT1G33660 | 0        | 3.568492 | 3.862963 | 0        | 0        | 0.996841 | 1.778607 | 0        | 0.976246 | 1.919071 | 5.321336 | 5.179533 | -1.01151 | 0.122762 | -0.52666  | 0.482895 | 0.478069 | NA       |
| AT1G33670 | AT1G33670 | 0        | 0        | 0        | 0        | 0        | 0        | 0        | 0        | 0        | 0        | 0        | 0        | #N/A     | #N/A     | #N/A      | #N/A     | #N/A     | #N/A     |
| AT1G33680 | AT1G33680 | 379.2604 | 371.1232 | 334.7901 | 278.7929 | 194.1029 | 325.9669 | 259.6766 | 351.7181 | 174.748  | 349.271  | 292.6735 | 295.2334 | -0.42669 | 0.101073 | -0.44747  | 0.098    | -0.20152 | 0.677118 |
| AT1G33700 | AT1G33700 | 95.11232 | 53.52738 | 55.36914 | 27.21943 | 19.21155 | 25.91786 | 23.21289 | 35.60337 | 23.4299  | 45.09817 | 45.23135 | 48.68761 | -1.40848 | 2.93E-06 | -1.24792  | 6.94E-05 | -0.53499 | 0.273174 |
| AT1G33709 | AT1G33709 | 0        | 0        | 0        | 0        | 0        | 0        | 0        | 0        | 0        | 0        | 0        | 0        | #N/A     | #N/A     | #N/A      | #N/A     | #N/A     | #N/A     |
| AT1G33710 | AT1G33710 | 0        | 0        | 0        | 0        | 0        | 0        | 0        | 0        | 0        | 0        | 0        | 0        | #N/A     | #N/A     | #N/A      | #N/A     | #N/A     | #N/A     |
| AT1G33720 | CYP76C6   | 97.49012 | 169.5034 | 113.3136 | 472.2158 | 482.9386 | 546.2687 | 410.8582 | 446.6604 | 473.4793 | 78.68192 | 59.86503 | 72.51346 | 1.957305 | 2.7E-28  | 1.787834  | 2.31E-23 | -0.78182 | 0.003227 |
| AT1G33730 | CYP76C5   | 2.377808 | 5.352738 | 3.862963 | 26.80701 | 20.53649 | 24.92102 | 95.15547 | 100.3368 | 39.04984 | 2.878607 | 2.660668 | 2.071813 | 2.023304 | 1.85E-05 | 3.578865  | 1.25E-15 | -0.34465 | 0.766854 |
| AT1G33740 | AT1G33740 | 0        | 0        | 0        | 0        | 0        | 0        | 0.996841 | 0        | 0.976246 | 0        | 0        | 0        | 0.133781 | NA       | 0.142196  | NA       | 0        | NA       |
| AT1G33743 | AT1G33743 | 0        | 0        | 0        | 0        | 0        | 0        | 0.889303 | 1.07889  | 0        | 0        | 0        | 0        | 0        | NA       | 0.3225    | NA       | 0        | NA       |
| AT1G33750 | TPS22     | 0        | 0        | 0        | 0        | 0        | 0.996841 | 0        | 0        | 0        | 0        | 0        | 0        | 0.15625  | NA       | 0         | NA       | 0        | NA       |
| AT1G33760 | ERF022    | 1.188904 | 0        | 3.862963 | 3.71174  | 1.324935 | 17.94313 | 8.003731 | 16.18335 | 12.6912  | 4.797678 | 2.660668 | 1.035907 | 1.019594 | 0.11806  | 1.552461  | 0.014689 | 0.239258 | NA       |
| AT1G33770 | AT1G33770 | 97.49012 | 105.2705 | 96.57408 | 16.08421 | 17.88662 | 21.9305  | 20.45398 | 28.05114 | 41.97858 | 60.60099 | 82.48071 | 72.51346 | -2.32297 | 1.47E-19 | -1.6446   | 2.53E-10 | -0.32933 | 0.45067  |
| AT1G33780 | AT1G33780 | 282.9591 | 349.7122 | 328.9259 | 301.723  | 308.0473 | 338.9259 | 285.4664 | 265.4069 | 322.1612 | 260.9937 | 252.7635 | 338.7414 | -0.01522 | 0.947998 | -0.13042  | 0.531833 | -0.16233 | 0.60815  |
| AT1G33785 | AT1G33785 | 0        | 0        | 0        | 0        | 0        | 0        | 0.889303 | 0        | 0        | 0        | 0        | 0        | 0        | NA       | 0.160764  | NA       | 0        | NA       |
| AT1G33790 | JAL4      | 29.7226  | 32.11643 | 25.75309 | 63.512   | 52.99738 | 71.77254 | 40.90796 | 69.04896 | 40.02609 | 24.94793 | 23.94601 | 21.75404 | 1.037645 | 0.000707 | 0.719085  | 0.033935 | -0.27695 | 0.681983 |
| AT1G33800 | GXM3      | 35.66712 | 16.05821 | 29.61605 | 20.20836 | 27.16116 | 18.93997 | 11.56095 | 17.26224 | 20.50117 | 34.54328 | 26.60668 | 16.5745  | -0.28884 | 0.522096 | -0.67323  | 0.12911  | -0.06387 | 0.93307  |
| AT1G33810 | AT1G33810 | 625.3635 | 651.2498 | 657.9914 | 675.9491 | 692.2783 | 508.3888 | 594.0547 | 569.6539 | 936.2199 | 993.1194 | 1350.289 | 770.7145 | -0.04055 | 0.899986 | -0.114024 | 0.716241 | -0.68038 | 0.034852 |
| AT1G33811 | AT1G33811 | 237.7808 | 303.3218 | 296.1605 | 158.78   | 148.3927 | 169.4629 | 128.949  | 146.729  | 116.1733 | 266.7509 | 248.7725 | 213.3967 | -0.79503 | 1.5E-06  | -1.06909  | 2.75E-10 | -0.19024 | 0.545129 |
| AT1G33813 | AT1G33813 | 0        | 0        | 0        | 0.824831 | 1.987402 | 3.987363 | 7.114428 | 1.07889  | 3.904984 | 0        | 0        | 0        | 0.904212 | 0.157525 | 1.43951   | 0.020356 | 0        | NA       |
| AT1G33817 | AT1G33817 | 0        | 0        | 0        | 2.062078 | 3.312336 | 2.990522 | 6.225124 | 4.31556  | 2.928738 | 0.959536 | 0        | 0        | 1.147086 | 0.073161 | 1.594536  | 0.011351 | 0.106801 | NA       |
| AT1G33820 | AT1G33820 | 0        | 0        | 0        | 0        | 0        | 0        | 0        | 0        | 0        | 0        | 0        | 0        | #N/A     | #N/A     | #N/A      | #N/A     | #N/A     | #N/A     |
| AT1G33830 | AT1G33830 | 0        | 0        | 0        | 0        | 0        | 0        | 0        | 0        | 0.959536 | 0        | 0        | 0        | 0        | NA       | 0         | NA       | 0.171512 | NA       |
| AT1G33835 | AT1G33835 | 0        | 0        | 0        | 0        | 0        | 0        | 0        | 0        | 0        | 0        | 0        | 0        | #N/A     | #N/A     | #N/A      | #N/A     | #N/A     | #N/A     |
| AT1G33840 | AT1G33840 | 1.188904 | 0        | 1.287654 | 16.08421 | 22.52389 | 20.93366 | 0.889303 | 0        | 2.928738 | 0        | 0        | 0        | 2.988125 | 1.4E-07  | 0.087195  | 0.92197  | -0.5394  | NA       |
| AT1G33850 | AT1G33850 | 0        | 0        | 0        | 0        | 0        | 0        | 0        | 0        | 0        | 0        | 0        | 0        | #N/A     | #N/A     | #N/A      | #N/A     | #N/A     | #N/A     |
| AT1G33855 | AT1G33855 | 0        | 0        | 0        | 0        | 0        | 0        | 0        | 0        | 0        | 0        | 0        | 0        | #N/A     | #N/A     | #N/A      | #N/A     | #N/A     | #N/A     |
| AT1G33860 | AT1G33860 | 0        | 1.784246 | 0        | 0.412416 | 0        | 0        | 0        | 0        | 0        | 0        | 0        | 0        | -0.15186 | NA       | -0.24242  | NA       | -0.23806 | NA       |
| AT1G33870 | AT1G33870 | 0        | 0        | 0        | 0        | 0        | 0        | 0.889303 | 0        | 0        | 0        | 0        | 0        | 0        | NA       | 0.160764  | NA       | 0        | NA       |
| AT1G33880 | AT1G33880 | 0        | 0        | 0        | 0        | 0        | 0        | 0        | 0        | 0.976246 | 0        | 0        | 0        | 0        | NA       | 0.16673   | NA       | 0        | NA       |
| AT1G33890 | AT1G33890 | 0        | 0        | 0        | 0.412416 | 0.662467 | 0.996841 | 0        | 0        | 0        | 0        | 1.330334 | 1.035907 | 0.406123 | NA       | 0         | NA       | 0.419416 | NA       |
| AT1G33900 | AT1G33900 | 1.188904 | 0        | 1.287654 | 0        | 0        | 0        | 0        | 0        | 0.976246 | 0        | 0        | 0        | -0.47697 | NA       | -0.2434   | NA       | -0.43599 | NA       |
| AT1G33910 | AT1G33910 | 0        | 0        | 0        | 0        | 0        | 0        | 0        | 0        | 0        | 0        | 0        | 0        | #N/A     | #N/A     | #N/A      | #N/A     | #N/A     | #N/A     |
| AT1G33920 | PP2A4     | 1.188904 | 0        | 0        | 0        | 0        | 0        | 0        | 0        | 0        | 0        | 0        | 0        | -0.2184  | NA       | -0.20558  | NA       | -0.19918 | NA       |
| AT1G33925 | AT1G33925 | 0        | 0        | 0        | 0        | 0        | 0        | 0        | 0        | 0        | 0        | 0        | 0        | 0        | NA       | 0         | NA       | 0.172362 | NA       |
| AT1G33930 | AT1G33930 | 21.40027 | 12.48972 | 29.61605 | 10.31039 | 11.26194 | 11.96209 | 8.003731 | 10.7889  | 9.76246  | 23.98839 | 34.58868 | 23.82585 | -0.85764 | 0.038786 | -1.02944  | 0.020723 | 0.306867 | 0.695407 |
| AT1G33940 | AT1G33940 | 10.70014 | 7.136984 | 5.150617 | 6.186234 | 11.92441 | 9.968408 | 9.782338 | 12.94668 | 9.76246  | 10.55489 | 6.65167  | 14.50269 | 0.174203 | 0.785687 | 0.374091  | 0.550604 | 0.368005 | NA       |
| AT1G33950 | AT1G33950 | 1.188904 | 3.568492 | 1.287654 | 19.79595 | 16.56168 | 10.96525 | 52.46891 | 44.23449 | 24.40615 | 0        | 1.330334 | 0        | 2.0885   | 6.25E-05 | 3.277693  | 5.36E-11 | -0.63249 | NA       |
| AT1G33960 | AIG1      | 66.57862 | 115.976  | 90.1358  | 1044.236 | 976.4768 | 949.9893 | 1766.157 | 1626.966 | 1660.594 | 34.54328 | 53.21336 | 65.26211 | 3.386108 | 1.4E-82  | 4.139371  | 5.2E-124 | -0.77368 | 0.006498 |
| AT1G33970 | AT1G33970 | 510.0398 | 635.1916 | 576.8691 | 738.6363 | 696.9156 | 700.7791 | 801.2624 | 867.4275 | 1154.899 | 576.6809 | 706.4073 | 594.6103 | 0.308543 | 0.082391 | 0.703003  | 1.91E-05 | 0.123258 | 0.719598 |
| AT1G33980 | UPF3      | 404.2273 | 378.2602 | 366.9815 | 382.7217 | 325.9339 | 416.6794 | 810.6219 | 412.136  | 302.6363 | 352.1496 | 297.9948 | 332.526  | -0.03337 | 0.878922 | -0.06986  | 0.753796 | -0.22014 | 0.446233 |
| AT1G33990 | MES14     | 525.4955 | 686.9347 | 646.4025 | 944.0193 | 954.6153 | 859.2768 | 849.0485 | 741.1974 | 817.1179 | 612.1837 | 561.4009 | 619.4721 | 0.569041 | 9.23E-06 | 0.356061  | 0.01031  | -0.04528 | 0.887392 |
| AT1G34000 | QHP2      | 1119.948 | 1154.407 | 1193.656 | 738.8735 | 837.3586 | 669.877  | 962.2264 | 822.1141 | 1290.597 | 1346.228 | 1459.376 | 1440.946 | -0.61311 | 0.000217 | -0.16982  | 0.40326  | 0.286676 | 0.286373 |
| AT1G34010 | AT1G34010 | 161.6902 | 212.3253 | 178.984  | 142.6958 | 156.3423 | 112.643  | 113.8308 | 71.20674 | 130.3633 | 179.4332 | 176.9344 | 167.8169 | -0.39623 | 0.069483 | -0.871    | 4.12E-05 | -0.06669 | 0.893759 |
| AT1G34020 | AT1G34020 | 252.0076 | 173.0719 | 206.0247 | 209.5071 | 237.8258 | 222.2955 | 232.1082 | 225.488  | 230.3941 | 225.4909 | 266.0668 | 236.1867 | 0.068678 | 0.746897 | 0.109668  | 0.612584 | 0.184875 | 0.55204  |
| AT1G34030 | RP518A    | 864.3332 | 1009.883 | 1031.411 | 1309.419 | 1541.561 | 1138.392 | 977.3445 | 837.2186 | 1520.991 | 1024.784 | 1021.696 | 1133.282 | 0.445146 | 0.040655 | 0.193947  | 0.448941 | 0.12686  | 0.77538  |
| AT1G34040 | TAR3      | 14.26685 | 7.136984 | 16.73951 | 5.361402 | 1.324935 | 0.996841 | 1.778607 | 0        | 3.904984 | 6.762825 | 25.27635 | 9.323159 | -1.72404 | 0.003938 | -1.72704  | 0.003938 | 0.086154 | NA       |
| AT1G34041 | AT1G34041 | 0        | 1.784246 | 0        | 0        | 0        | 0        | 0        | 0        | 0        | 0        | 0        | 0        | -0.2184  | NA       | -0.20558  | NA       | -0.19918 | NA       |
| AT1G34042 | AT1G34042 | 0        | 0        | 1.287654 | 0        | 0        | 0        | 0        | 0        | 0        | 1.330334 | 0        | 0        | -0.22987 | NA       | -0.21319  | NA       | -0.00675 | NA       |
| AT1G34044 | AT1G34044 | 10.70014 | 5.352738 | 3.862963 | 17.32145 | 18.54908 | 16.94629 | 13.33955 | 4.31556  | 5.857476 | 6.716749 | 3.991002 | 4.143626 | 1.140174 | 0.026474 | 0.166813  | 0.818674 | -0.31667 | NA       |
| AT1G34046 | AT1G34046 | 0        | 0        | 0        | 0        | 0        | 0        | 0        | 0        | 0        | 0        | 0        | 0        | #N/A     | #N/A     | #N/A      | #N/A     | #N/A     | #N/A     |
| AT1G34047 | AT1G34047 | 0        | 0        | 0        | 0        | 0        | 0        | 0        | 0        | 0        | 0        | 0        | 0        | #N/A     | #N/A     | #N/A      | #N/A     | #N/A     | #N/A     |
| AT1G34050 | AT1G34050 | 0        | 0        | 0        | 0        | 0        | 0        | 0        | 0        | 0.976246 | 0        | 0        | 0        | 0        | NA       | 0.16673   | NA       | 0        | NA       |
| AT1G34060 | TAR4      | 180.7134 | 165.9349 | 184.1346 | 89.9066  | 85.45828 | 82.73778 | 146.7351 | 107.889  | 119.102  | 258.1151 | 268.7275 | 226.8635 | -1.01514 | 3.97E    |           |          |          |          |





|           |           |          |          |          |          |          |          |          |          |          |          |          |          |          |          |          |          |           |          |
|-----------|-----------|----------|----------|----------|----------|----------|----------|----------|----------|----------|----------|----------|----------|----------|----------|----------|----------|-----------|----------|
| AT1G35340 | AT1G35340 | 392.3383 | 419.2978 | 453.2543 | 439.2226 | 425.304  | 385.7774 | 589.6082 | 483.3427 | 534.0066 | 462.4962 | 544.1066 | 573.8922 | -0.01275 | 0.95037  | 0.342292 | 0.026744 | 0.315773  | 0.146987 |
| AT1G35350 | PH01-H8   | 324.5708 | 353.2807 | 320.6259 | 517.5815 | 468.3644 | 687.8201 | 606.505  | 669.9907 | 600.3913 | 269.6295 | 234.1388 | 260.0125 | 0.728889 | 6.9E-06  | 0.895975 | 2.47E-08 | -0.37344  | 0.149765 |
| AT1G35360 | AT1G35360 | 0        | 0        | 0        | 0        | 0        | 0        | 0        | 0        | 0        | 0.959536 | 0        | 0        | 0        | 0        | 0        | 0        | 0.17512   | NA       |
| AT1G35365 | AT1G35365 | 0        | 0        | 0        | 0        | 0        | 0        | 0        | 0        | 0        | 0        | 0        | 0        | #N/A     | #N/A     | #N/A     | #N/A     | #N/A      | #N/A     |
| AT1G35370 | AT1G35370 | 1.188904 | 0        | 0        | 0        | 0.662467 | 0        | 1.778607 | 0        | 0        | 0.959536 | 0        | 1.035907 | -0.14147 | NA       | 0.090959 | NA       | 0.12315   | NA       |
| AT1G35375 | AT1G35375 | 0        | 0        | 0        | 0        | 0        | 0        | 0.889303 | 0        | 0        | 0        | 0        | 0        | 0        | NA       | 0.160764 | NA       | 0         | NA       |
| AT1G35380 | AT1G35380 | 0        | 0        | 0        | 0        | 0        | 0        | 0.889303 | 0        | 0.976246 | 0        | 0        | 0        | 0        | NA       | 0.309898 | NA       | 0         | NA       |
| AT1G35390 | AT1G35390 | 0        | 1.784246 | 0        | 0        | 0.662467 | 0        | 0        | 0        | 0        | 0        | 1.330334 | 0        | -0.13984 | NA       | -0.26204 | NA       | -0.04299  | NA       |
| AT1G35400 | AT1G35400 | 0        | 0        | 0        | 0        | 0        | 0        | 0        | 0        | 0        | 0        | 0        | 0        | #N/A     | #N/A     | #N/A     | #N/A     | #N/A      | #N/A     |
| AT1G35405 | AT1G35405 | 0        | 0        | 0        | 0        | 0.662467 | 1.993682 | 0        | 0        | 0        | 0        | 1.330334 | 0        | 0.406191 | NA       | 0        | NA       | 0.191533  | NA       |
| AT1G35410 | AT1G35410 | 0        | 0        | 0        | 0        | 0        | 0        | 0        | 0        | 0        | 0        | 0        | 0        | #N/A     | #N/A     | #N/A     | #N/A     | #N/A      | #N/A     |
| AT1G35420 | AT1G35420 | 499.3397 | 658.3868 | 552.4037 | 374.8858 | 349.1203 | 381.79   | 435.7587 | 508.1572 | 608.2013 | 588.1953 | 534.7943 | 566.6409 | -0.61432 | 9.02E-05 | -0.13345 | 0.500295 | -0.01127  | 0.981228 |
| AT1G35430 | AT1G35430 | 21.40027 | 42.8219  | 21.89012 | 33.40566 | 35.77323 | 23.92418 | 26.6791  | 35.60337 | 52.71728 | 16.31211 | 30.59768 | 34.18492 | 0.148398 | 0.758474 | 0.407891 | 0.366825 | -0.05468  | 0.959115 |
| AT1G35435 | AT1G35435 | 0        | 0        | 0        | 0        | 0        | 0        | 0        | 0        | 0        | 0        | 0        | 0        | #N/A     | #N/A     | #N/A     | #N/A     | #N/A      | #N/A     |
| AT1G35440 | CYCT1-1   | 0        | 1.784246 | 0        | 0        | 0        | 1.993682 | 0        | 0        | 0        | 0        | 0        | 0        | 0.052299 | NA       | -0.23056 | NA       | -0.2246   | NA       |
| AT1G35450 | AT1G35450 | 0        | 0        | 0        | 0        | 0        | 0        | 0.889303 | 0        | 0        | 0        | 0        | 0        | 0        | NA       | 0.160764 | NA       | 0         | NA       |
| AT1G35460 | BHLH80    | 217.5694 | 206.9725 | 279.421  | 266.008  | 302.7475 | 240.2386 | 285.4664 | 237.3558 | 306.5412 | 308.9705 | 329.9228 | 315.9515 | 0.194652 | 0.317444 | 0.228264 | 0.259276 | 0.424865  | 0.085758 |
| AT1G35461 | AT1G35461 | 0        | 0        | 0        | 0        | 0        | 0        | 0        | 0        | 0        | 0        | 0        | 0        | #N/A     | #N/A     | #N/A     | #N/A     | #N/A      | #N/A     |
| AT1G35465 | AT1G35465 | 0        | 0        | 0        | 0        | 0        | 0        | 0        | 0        | 0        | 0        | 0        | 0        | #N/A     | #N/A     | #N/A     | #N/A     | #N/A      | #N/A     |
| AT1G35467 | RALFL5    | 0        | 0        | 0        | 0        | 0        | 0        | 0        | 0        | 0        | 0        | 0        | 0        | #N/A     | #N/A     | #N/A     | #N/A     | #N/A      | #N/A     |
| AT1G35470 | AT1G35470 | 191.4135 | 214.1095 | 208.6    | 238.3762 | 250.4126 | 226.2829 | 204.5398 | 245.9869 | 184.5105 | 220.6932 | 196.8894 | 216.5045 | 0.222123 | 0.206531 | 0.048255 | 0.833998 | 0.052289  | 0.894522 |
| AT1G35480 | AT1G35480 | 0        | 0        | 0        | 0        | 0        | 0        | 0        | 0        | 0        | 0        | 0        | 0        | #N/A     | #N/A     | #N/A     | #N/A     | #N/A      | #N/A     |
| AT1G35490 | AT1G35490 | 0        | 0        | 0        | 0        | 0        | 0        | 0.889303 | 0        | 0        | 0        | 0        | 0        | 0        | NA       | 0.160764 | NA       | 0         | NA       |
| AT1G35500 | AT1G35500 | 0        | 0        | 0        | 0        | 0        | 0        | 0        | 0        | 0        | 0        | 0        | 0        | #N/A     | #N/A     | #N/A     | #N/A     | #N/A      | #N/A     |
| AT1G35501 | MIR773A   | 0        | 0        | 0        | 0        | 0        | 0        | 0        | 0        | 0        | 0        | 0        | 0        | #N/A     | #N/A     | #N/A     | #N/A     | #N/A      | #N/A     |
| AT1G35510 | AT1G35510 | 275.8257 | 244.4417 | 301.3111 | 230.9527 | 201.3901 | 258.1818 | 216.1007 | 206.068  | 155.2231 | 270.589  | 296.6645 | 280.7307 | -0.25477 | 0.1774   | -0.50231 | 0.006169 | 0.038659  | 0.931292 |
| AT1G35513 | AT1G35513 | 1.188904 | 3.568492 | 2.575309 | 1.649662 | 3.312336 | 1.993682 | 0        | 3.23667  | 2.928738 | 8.635821 | 10.64267 | 3.10772  | -0.06273 | 0.942293 | -0.13926 | 0.874181 | 1.051186  | NA       |
| AT1G35515 | HOS10     | 3.566712 | 1.784246 | 2.575309 | 1.649662 | 2.649869 | 2.990522 | 1.778607 | 3.23667  | 7.809968 | 2.878607 | 2.660668 | 7.251346 | -0.15894 | 0.84388  | 0.38473  | 0.624803 | 0.393198  | NA       |
| AT1G35516 | AT1G35516 | 280.5813 | 328.3013 | 339.9407 | 227.6534 | 271.6116 | 223.2923 | 206.3184 | 178.0168 | 287.0163 | 333.9184 | 340.5655 | 361.5314 | -0.38099 | 0.052751 | -0.48362 | 0.015617 | 0.126305  | 0.746119 |
| AT1G35520 | ARF15     | 0        | 0        | 0        | 0        | 0        | 0        | 0        | 0        | 0        | 1.330334 | 0        | 0        | 0        | NA       | 0        | NA       | 0.172362  | NA       |
| AT1G35530 | AT1G35530 | 32.10041 | 32.11643 | 24.46543 | 20.62078 | 19.87402 | 26.9147  | 23.12189 | 25.89336 | 13.66744 | 34.54328 | 38.57969 | 41.43626 | -0.3845  | 0.304492 | -0.4556  | 0.257863 | 0.349784  | 0.568907 |
| AT1G35535 | AT1G35535 | 1.188904 | 0        | 0        | 0        | 0.662467 | 0        | 0.889303 | 0        | 0.976246 | 0        | 0        | 1.035907 | -0.13768 | NA       | 0.109636 | NA       | -0.03917  | NA       |
| AT1G35537 | AT1G35537 | 0        | 0        | 0        | 0        | 0        | 0        | 0        | 0        | 0        | 0        | 0        | 0        | #N/A     | #N/A     | #N/A     | #N/A     | #N/A      | #N/A     |
| AT1G35540 | ARF14     | 0        | 0        | 0        | 0        | 0.996841 | 1.778607 | 0        | 0        | 0        | 0        | 0        | 0        | 0.124069 | NA       | 0.253321 | NA       | 0         | NA       |
| AT1G35545 | AT1G35545 | 0        | 0        | 0        | 0        | 0        | 0        | 0        | 0        | 0        | 0        | 0        | 0        | #N/A     | #N/A     | #N/A     | #N/A     | #N/A      | #N/A     |
| AT1G35550 | AT1G35550 | 0        | 0        | 0        | 0        | 0        | 0        | 0        | 0        | 0        | 0        | 0        | 0        | #N/A     | #N/A     | #N/A     | #N/A     | #N/A      | #N/A     |
| AT1G35560 | TCP23     | 120.0793 | 101.702  | 95.28642 | 63.09958 | 68.8966  | 52.83256 | 37.35075 | 62.57562 | 50.76479 | 103.6298 | 53.21336 | 78.7289  | -0.73553 | 0.006285 | -1.02822 | 0.000187 | -0.39627  | 0.381282 |
| AT1G35570 | AT1G35570 | 0        | 0        | 0        | 0        | 0        | 0        | 0        | 0        | 0        | 0        | 0        | 0        | #N/A     | #N/A     | #N/A     | #N/A     | #N/A      | #N/A     |
| AT1G35580 | CINV1     | 1282.827 | 1093.743 | 1053.301 | 1610.07  | 1583.959 | 1480.309 | 1312.612 | 1466.211 | 1466.321 | 875.0965 | 746.3174 | 904.3464 | 0.441412 | 0.000466 | 0.302621 | 0.025694 | -0.43587  | 0.007212 |
| AT1G35590 | AT1G35590 | 1.188904 | 0        | 0        | 0.412416 | 0        | 0        | 0        | 1.07889  | 0        | 0        | 0        | 0        | -0.15665 | NA       | -0.04031 | NA       | 0.127091  | NA       |
| AT1G35600 | AT1G35600 | 0        | 0        | 1.287654 | 0        | 0        | 0        | 0        | 0        | 0        | 0        | 0        | 1.035907 | -0.22368 | NA       | -0.20864 | NA       | -0.02973  | NA       |
| AT1G35610 | AT1G35610 | 0        | 0        | 0        | 0        | 0.662467 | 0        | 0        | 0        | 0        | 0        | 0        | 1.035907 | 0.098893 | NA       | 0        | NA       | 0.150283  | NA       |
| AT1G35612 | AT1G35612 | 462.4836 | 492.4519 | 540.8148 | 376.5354 | 396.8179 | 309.0206 | 389.5149 | 310.7203 | 327.0424 | 532.5423 | 512.1786 | 627.7594 | -0.45371 | 0.004712 | -0.5307  | 0.001121 | 0.159957  | 0.591139 |
| AT1G35614 | AT1G35614 | 0        | 0        | 0        | 0        | 0        | 0        | 0        | 0        | 0        | 1.330334 | 0        | 0        | 0        | NA       | 0        | NA       | 0.172362  | NA       |
| AT1G35617 | AT1G35617 | 0        | 0        | 0        | 0        | 0        | 0        | 0        | 0        | 0        | 0        | 0        | 0        | #N/A     | #N/A     | #N/A     | #N/A     | #N/A      | #N/A     |
| AT1G35620 | PDIL5-2   | 703.8311 | 817.1847 | 750.7025 | 612.8495 | 643.9182 | 645.9528 | 631.4055 | 570.7328 | 657.0136 | 739.802  | 653.194  | 720.9909 | -0.25144 | 0.041496 | -0.28218 | 0.026717 | -0.09745  | 0.681704 |
| AT1G35625 | AT1G35625 | 2.377808 | 1.784246 | 1.287654 | 3.71174  | 3.974804 | 2.990522 | 0.889303 | 1.07889  | 0        | 0.959536 | 0        | 0        | 0.646307 | 0.358537 | -0.53229 | 0.47697  | -0.67718  | NA       |
| AT1G35630 | RMR5      | 0        | 0        | 2.575309 | 1.649662 | 0.662467 | 0.996841 | 0        | 0        | 1.952492 | 0        | 0        | 1.035907 | 0.128486 | NA       | -0.10479 | NA       | -0.24509  | NA       |
| AT1G35640 | AT1G35640 | 0        | 0        | 0        | 0        | 0        | 0        | 0        | 0        | 0        | 0        | 0        | 0        | #N/A     | #N/A     | #N/A     | #N/A     | #N/A      | #N/A     |
| AT1G35645 | AT1G35645 | 0        | 0        | 0        | 0        | 0.996841 | 1.778607 | 2.15778  | 0        | 0.959536 | 0        | 0        | 0        | 0.103452 | NA       | 0.59684  | NA       | 0.158203  | NA       |
| AT1G35647 | AT1G35647 | 0        | 0        | 0        | 0        | 0        | 0        | 0        | 0        | 0        | 0        | 0        | 0        | #N/A     | #N/A     | #N/A     | #N/A     | #N/A      | #N/A     |
| AT1G35650 | AT1G35650 | 0        | 0        | 0        | 0        | 0        | 0        | 2.15778  | 0        | 0        | 0        | 0        | 1.035907 | 0        | NA       | 0.29752  | NA       | 0.151402  | NA       |
| AT1G35660 | AT1G35660 | 172.3911 | 151.6609 | 119.7519 | 96.09283 | 85.45828 | 112.643  | 101.3806 | 147.8079 | 77.12343 | 140.0922 | 119.7301 | 114.9856 | -0.5761  | 0.022456 | -0.43023 | 0.118603 | -0.23185  | 0.622127 |
| AT1G35663 | AT1G35663 | 1.188904 | 0        | 0        | 0        | 0        | 0        | 0        | 0        | 0        | 0        | 0        | 0        | -0.2184  | NA       | -0.20558 | NA       | -0.19918  | NA       |
| AT1G35670 | CPK11     | 268.6923 | 205.1883 | 162.2444 | 177.7511 | 174.2289 | 229.2734 | 183.1965 | 155.3602 | 186.463  | 210.1383 | 172.9434 | 213.3967 | -0.13732 | 0.587157 | -0.27046 | 0.273539 | -0.08972  | 0.855106 |
| AT1G35680 | RPL21     | 2829.591 | 3042.139 | 3326.011 | 2393.248 | 2714.128 | 2137.227 | 2657.239 | 2471.737 | 3359.262 | 4007.98  | 4858.38  | 3897.08  | -0.33805 | 0.042903 | -0.11373 | 0.575275 | 0.464421  | 0.027236 |
| AT1G35690 | AT1G35690 | 0        | 0        | 0        | 0        | 0        | 0        | 0        | 0        | 0        | 0        | 0        | 0        | #N/A     | #N/A     | #N/A     | #N/A     | #N/A      | #N/A     |
| AT1G35700 | AT1G35700 | 0        | 0        | 0        | 0        | 0        | 0        | 0.889303 | 0        | 0        | 0        | 1.330334 | 0        | 0        | NA       | 0.141773 | NA       | 0.183636  | NA       |
| AT1G35710 | AT1G35710 | 2287.451 | 2526.492 | 1923.756 | 5360.165 | 4938.031 | 5965.095 | 3646.144 | 3865.663 | 2583.147 | 682.2298 | 675.8097 | 774.8581 | 1.24693  | 1.8E-14  | 0.197359 | 0.001111 | 0.162269  | 2E-21    |
| AT1G35720 | ANN1      | 2453.898 | 2150.016 | 2778.758 | 3202.407 | 3210.316 | 2839.999 | 2678.582 | 2613.071 | 3196.229 | 2589.787 | 2807.005 | 2636.382 | 0.321277 | 0.020412 | 0.572781 | 0.198885 | -0.188625 | 0.648366 |
| AT1G35730 | APUM9     | 3.566712 | 0        | 0        | 1.237247 | 1.987402 | 1.993682 | 1.778607 | 2.15778  | 1.952492 | 0        | 2.660668 | 4.143626 | 0.125501 | 0.879383 | 0.223359 | 0.791355 | 0.30818   | NA       |
| AT1G35735 | AT1G35735 | 1.188904 | 0        | 0        | 1.649662 | 0.662467 | 0        | 1.778607 | 2.15778  | 0.976246 | 0        | 0        | 0        | 0.222126 | NA       | 0.54501  | NA       | -0.27228  | NA       |
| AT1G35740 | AT1G35740 | 0        | 0        | 0        | 0        | 0        | 0        | 0.889303 | 0        | 0        | 0        | 0        | 0        | 0        | NA       | 0.160764 | NA       | 0         | NA       |
| AT1G35745 | AT1G35745 | 0        | 0        | 0        | 0        | 0        | 0        | 0        | 0.976246 | 0        | 0        | 0        | 1.035907 | 0        | NA       | 0.14724  | NA       | 0.156349  | NA       |
| AT1G35750 | APUM10    | 1.188904 | 0        | 0        | 0        | 0        | 0        |          |          |          |          |          |          |          |          |          |          |           |          |

|           |           |          |          |          |          |          |          |          |          |          |          |          |          |          |          |           |          |          |          |
|-----------|-----------|----------|----------|----------|----------|----------|----------|----------|----------|----------|----------|----------|----------|----------|----------|-----------|----------|----------|----------|
| AT1G36130 | AT1G36130 | 0        | 1.784246 | 0        | 0        | 0        | 0        | 0.889303 | 0        | 0        | 0        | 0        | -0.26522 | NA       | -0.08117 | NA        | -0.24296 | NA       |          |
| AT1G36140 | AT1G36140 | 0        | 0        | 0        | 0        | 0        | 0        | 0.889303 | 1.07889  | 0        | 0        | 0        | 0        | NA       | 0.3225   | NA        | 0        | NA       |          |
| AT1G36150 | AT1G36150 | 0        | 0        | 0        | 0.824831 | 0        | 0        | 0        | 0        | 0        | 0        | 0        | 0.173038 | NA       | 0        | NA        | 0        | NA       |          |
| AT1G36160 | ACC1      | 1720.344 | 1352.458 | 1131.848 | 584.8053 | 568.3969 | 743.6432 | 775.4726 | 966.6854 | 606.2488 | 1162.957 | 1058.946 | 1089.774 | -1.1199  | 6.02E-09 | -0.81856  | 3.95E-05 | -0.33538 | 0.304149 |
| AT1G36180 | ACC2      | 181.9023 | 189.1301 | 123.6148 | 108.8777 | 90.09555 | 167.4693 | 150.2923 | 180.1746 | 99.57709 | 173.6759 | 150.3277 | 154.3501 | -0.41997 | 0.151811 | -0.18957  | 0.582767 | -0.04067 | 0.95645  |
| AT1G36185 | AT1G36185 | 0        | 0        | 0        | 0        | 0.662467 | 0.996841 | 0.889303 | 1.07889  | 0        | 0        | 0        | 0        | 0.285015 | NA       | 0.350274  | NA       | 0        | NA       |
| AT1G36190 | AT1G36190 | 0        | 0        | 0        | 0        | 0        | 0        | 0        | 0        | 0        | 0        | 0        | 0        | #N/A     | #N/A     | #N/A      | #N/A     | #N/A     | #N/A     |
| AT1G36200 | AT1G36200 | 0        | 0        | 0        | 0        | 0        | 0        | 0        | 0        | 0        | 0        | 0        | 1.035907 | 0        | NA       | 0         | NA       | 0.172362 | NA       |
| AT1G36210 | AT1G36210 | 0        | 1.784246 | 0        | 0        | 0.662467 | 0        | 0        | 0        | 0        | 0        | 0        | 0        | -0.12017 | NA       | -0.24312  | NA       | -0.23848 | NA       |
| AT1G36220 | AT1G36220 | 0        | 0        | 0        | 0        | 0        | 0        | 0        | 0        | 0        | 0        | 1.330334 | 0        | 0        | NA       | 0         | NA       | 0.172362 | NA       |
| AT1G36225 | AT1G36225 | 2.377808 | 0        | 0        | 0        | 0        | 0        | 0        | 0        | 0        | 0        | 0        | 0        | -0.32938 | NA       | -0.31889  | NA       | -0.31551 | NA       |
| AT1G36230 | AT1G36230 | 0        | 0        | 0        | 0        | 0        | 0        | 0.889303 | 0        | 0        | 0        | 0        | 1.035907 | 0        | NA       | 0.137906  | NA       | 0.15538  | NA       |
| AT1G36240 | RPL30A    | 1.188904 | 0        | 0        | 0        | 0        | 0        | 0.889303 | 0        | 0        | 0        | 0        | 0        | -0.20902 | NA       | -0.03919  | NA       | -0.19148 | NA       |
| AT1G36250 | AT1G36250 | 0        | 0        | 0        | 0        | 0        | 0        | 0.889303 | 2.15778  | 1.952492 | 0        | 2.660668 | 0        | 0        | NA       | 0.775161  | NA       | 0.398211 | NA       |
| AT1G36260 | AT1G36260 | 0        | 0        | 0        | 0        | 0        | 0        | 0        | 0        | 0        | 0        | 1.330334 | 0        | 0        | NA       | 0         | NA       | 0.172362 | NA       |
| AT1G36270 | AT1G36270 | 1.188904 | 0        | 1.287654 | 0        | 0.662467 | 0        | 0.889303 | 2.15778  | 0.976246 | 0.959536 | 0        | 1.035907 | -0.44443 | NA       | 0.222702  | NA       | -0.08643 | NA       |
| AT1G36272 | AT1G36272 | 0        | 0        | 0        | 0        | 0        | 0        | 0        | 0        | 0        | 0        | 0        | 0        | #N/A     | #N/A     | #N/A      | #N/A     | #N/A     | #N/A     |
| AT1G36280 | AT1G36280 | 183.0912 | 214.1095 | 191.8605 | 181.8753 | 198.0777 | 189.3997 | 183.1965 | 166.1491 | 162.0568 | 207.2597 | 243.4511 | 223.7558 | -0.04322 | 0.833615 | -0.1915   | 0.311418 | 0.195187 | 0.489839 |
| AT1G36290 | AT1G36290 | 0        | 0        | 0        | 0        | 0        | 0        | 0        | 0        | 0        | 0        | 0        | 0        | #N/A     | #N/A     | #N/A      | #N/A     | #N/A     | #N/A     |
| AT1G36300 | AT1G36300 | 1.188904 | 0        | 0        | 0        | 0.662467 | 0        | 1.778607 | 0        | 0        | 0        | 0        | 0        | -0.09734 | NA       | -0.091285 | NA       | -0.19961 | NA       |
| AT1G36305 | AT1G36305 | 2.377808 | 0        | 0        | 0        | 0.412416 | 0        | 0        | 0        | 0        | 0        | 0.959536 | 0        | -0.31027 | NA       | -0.3876   | NA       | -0.20548 | NA       |
| AT1G36310 | AT1G36310 | 328.1375 | 383.6129 | 365.6938 | 364.5754 | 374.294  | 373.8153 | 382.4005 | 400.2682 | 441.2632 | 344.4733 | 344.5565 | 367.7468 | 0.049872 | 0.764717 | 0.186498  | 0.213183 | -0.02204 | 0.950673 |
| AT1G36320 | AT1G36320 | 1332.761 | 1377.438 | 1461.488 | 1221.575 | 1214.965 | 1131.414 | 1488.694 | 1451.107 | 1763.1   | 1439.303 | 1640.302 | 1468.915 | -0.22237 | 0.079645 | 0.171422  | 0.211568 | 0.122533 | 0.585295 |
| AT1G36330 | AT1G36330 | 0        | 0        | 0        | 0        | 0        | 0        | 1.778607 | 1.07889  | 0        | 0        | 0        | 1.035907 | 0        | NA       | 0.472497  | NA       | 0.176389 | NA       |
| AT1G36340 | UBC31     | 0        | 0        | 0        | 0.412416 | 0        | 0        | 2.66791  | 0        | 0        | 0        | 0        | 0        | 0.032373 | NA       | 0.366656  | NA       | 0.286233 | NA       |
| AT1G36350 | AT1G36350 | 0        | 0        | 0        | 0        | 0        | 0        | 0        | 0        | 0        | 0        | 0        | 0        | #N/A     | #N/A     | #N/A      | #N/A     | #N/A     | #N/A     |
| AT1G36360 | AT1G36360 | 0        | 0        | 0        | 0        | 0        | 0        | 1.778607 | 0        | 1.952492 | 0        | 0        | 0        | 0        | NA       | 0.588939  | NA       | 0        | NA       |
| AT1G36370 | SHM7      | 334.082  | 321.1643 | 294.8728 | 197.5471 | 196.0903 | 222.2955 | 175.1928 | 227.6458 | 171.8193 | 270.589  | 240.7904 | 256.9048 | -0.6207  | 5.52E-05 | -0.71686  | 5.65E-06 | -0.29855 | 0.230043 |
| AT1G36380 | AT1G36380 | 55.87849 | 51.74313 | 64.38272 | 94.44317 | 78.17114 | 43.86099 | 93.37687 | 79.83786 | 119.102  | 74.84378 | 50.55269 | 65.26211 | 0.329774 | 0.322844 | 0.715808  | 0.021871 | 0.140929 | 0.838515 |
| AT1G36390 | AT1G36390 | 376.8826 | 419.2978 | 412.0494 | 355.0898 | 431.2662 | 394.7489 | 439.3159 | 391.637  | 501.7904 | 465.3748 | 392.4485 | 583.2154 | -0.03251 | 0.891759 | 0.14083   | 0.519766 | 0.253386 | 0.395535 |
| AT1G36395 | AT1G36395 | 0        | 0        | 0        | 0        | 0        | 0        | 0        | 0        | 0        | 0        | 0        | 0        | #N/A     | #N/A     | #N/A      | #N/A     | #N/A     | #N/A     |
| AT1G36400 | AT1G36400 | 0        | 0        | 0        | 0        | 0        | 0        | 0        | 0        | 0        | 0        | 0        | 0        | #N/A     | #N/A     | #N/A      | #N/A     | #N/A     | #N/A     |
| AT1G36403 | AT1G36403 | 0        | 0        | 0        | 0        | 0.662467 | 0        | 0        | 0        | 0        | 0        | 0        | 0        | 0.128567 | NA       | 0         | NA       | 0        | NA       |
| AT1G36406 | AT1G36406 | 0        | 0        | 0        | 0        | 0        | 0        | 0        | 0        | 0        | 0        | 0        | 0        | #N/A     | #N/A     | #N/A      | #N/A     | #N/A     | #N/A     |
| AT1G36420 | AT1G36420 | 0        | 0        | 0        | 0        | 0        | 0        | 0        | 0        | 0        | 0        | 0        | 0        | #N/A     | #N/A     | #N/A      | #N/A     | #N/A     | #N/A     |
| AT1G36430 | AT1G36430 | 0        | 0        | 0        | 0        | 0        | 0        | 0        | 0        | 0        | 0        | 0        | 1.035907 | 0        | NA       | 0         | NA       | 0.172362 | NA       |
| AT1G36440 | AT1G36440 | 1.188904 | 0        | 0        | 0        | 0        | 0        | 0        | 0        | 0        | 0        | 0        | 0        | -0.2184  | NA       | -0.20558  | NA       | -0.19918 | NA       |
| AT1G36441 | AT1G36441 | 0        | 0        | 0        | 0        | 0        | 0        | 0        | 0        | 0        | 0        | 0        | 0        | #N/A     | #N/A     | #N/A      | #N/A     | #N/A     | #N/A     |
| AT1G36445 | AT1G36445 | 0        | 0        | 0        | 0        | 0        | 0        | 0        | 0        | 0        | 0        | 0        | 0        | #N/A     | #N/A     | #N/A      | #N/A     | #N/A     | #N/A     |
| AT1G36450 | AT1G36450 | 0        | 0        | 0        | 0        | 0        | 0        | 0        | 0        | 0        | 0        | 0        | 0        | #N/A     | #N/A     | #N/A      | #N/A     | #N/A     | #N/A     |
| AT1G36460 | AT1G36460 | 0        | 0        | 0        | 0        | 0        | 0        | 0        | 0        | 0        | 0        | 1.330334 | 0        | 0        | NA       | 0         | NA       | 0.172362 | NA       |
| AT1G36470 | AT1G36470 | 0        | 0        | 1.287654 | 0        | 0        | 0        | 1.778607 | 0        | 0.976246 | 0        | 0        | 0        | -0.28422 | NA       | 0.251617  | NA       | -0.23881 | NA       |
| AT1G36480 | AT1G36480 | 1.188904 | 0        | 0        | 0        | 0        | 0        | 0.889303 | 0        | 0        | 0        | 0        | 0        | -0.20902 | NA       | -0.03919  | NA       | -0.19148 | NA       |
| AT1G36485 | AT1G36485 | 0        | 0        | 0        | 0        | 0.662467 | 0        | 0.889303 | 0        | 0        | 0        | 0        | 0        | 0.097058 | NA       | 0.130384  | NA       | 0        | NA       |
| AT1G36490 | AT1G36490 | 0        | 0        | 0        | 0        | 0.662467 | 0        | 0.889303 | 0        | 0        | 0        | 0        | 2.071813 | 0.085978 | NA       | 0.134127  | NA       | 0.305424 | NA       |
| AT1G36495 | AT1G36495 | 0        | 0        | 0        | 0        | 0        | 0        | 0        | 0        | 0.976246 | 0        | 0        | 0        | 0        | NA       | 0.16673   | NA       | 0        | NA       |
| AT1G36500 | AT1G36500 | 0        | 0        | 0        | 0        | 0        | 0        | 0        | 0        | 0        | 0        | 0        | 2.071813 | 0        | NA       | 0         | NA       | 0.262302 | NA       |
| AT1G36510 | AT1G36510 | 0        | 0        | 0        | 0        | 0.662467 | 0        | 0        | 0        | 0        | 0        | 0        | 0        | 0.128567 | NA       | 0         | NA       | 0        | NA       |
| AT1G36520 | AT1G36520 | 0        | 0        | 0        | 0        | 0        | 0        | 0.889303 | 0        | 0.976246 | 1.919071 | 0        | 0        | 0        | NA       | 0.309455  | NA       | 0.322439 | NA       |
| AT1G36530 | AT1G36530 | 0        | 0        | 0        | 0        | 0        | 0        | 1.778607 | 0        | 0        | 0        | 0        | 1.035907 | 0        | NA       | 0.26262   | NA       | 0.150298 | NA       |
| AT1G36540 | AT1G36540 | 1.188904 | 0        | 0        | 0        | 0        | 1.993682 | 0        | 0        | 0        | 0        | 0        | 2.071813 | 0.073425 | NA       | -0.19538  | NA       | 0.109692 | NA       |
| AT1G36550 | AT1G36550 | 0        | 0        | 0        | 0        | 0        | 0        | 0        | 0        | 0        | 0        | 0        | 0        | #N/A     | #N/A     | #N/A      | #N/A     | #N/A     | #N/A     |
| AT1G36560 | AT1G36560 | 0        | 3.568492 | 0        | 0        | 0        | 0        | 0.889303 | 0        | 0        | 0.959536 | 0        | 0        | -0.50356 | NA       | -0.29875  | NA       | -0.28224 | NA       |
| AT1G36570 | AT1G36570 | 0        | 0        | 0        | 0        | 0        | 0        | 0.889303 | 0        | 0        | 0        | 0        | 1.035907 | 0        | NA       | 0.137906  | NA       | 0.15538  | NA       |
| AT1G36580 | AT1G36580 | 15.45575 | 19.62671 | 19.31482 | 17.32145 | 17.22415 | 17.94313 | 20.01119 | 21.5778  | 21.47741 | 16.31211 | 18.62468 | 14.50269 | -0.0407  | 0.93753  | 0.288567  | 0.537535 | -0.12133 | 0.896127 |
| AT1G36590 | AT1G36590 | 1.188904 | 0        | 0        | 0        | 0.662467 | 0        | 0.889303 | 1.07889  | 1.952492 | 0        | 0        | 1.035907 | -0.18094 | NA       | 0.429305  | NA       | -0.05154 | NA       |
| AT1G36595 | AT1G36595 | 0        | 0        | 0        | 0        | 0        | 0        | 0        | 0        | 0        | 0        | 0        | 0        | #N/A     | #N/A     | #N/A      | #N/A     | #N/A     | #N/A     |
| AT1G36600 | AT1G36600 | 0        | 0        | 1.287654 | 1.237247 | 0        | 0.996841 | 1.778607 | 3.23667  | 0.976246 | 0.959536 | 0        | 0        | 0.129869 | 0.860665 | 0.653562  | 0.316163 | -0.07924 | NA       |
| AT1G36605 | AT1G36605 | 0        | 0        | 0        | 0        | 0        | 0        | 0.889303 | 0        | 0.976246 | 0        | 0        | 0        | 0        | NA       | 0.309898  | NA       | 0        | NA       |
| AT1G36610 | AT1G36610 | 2.377808 | 0        | 0        | 0        | 1.324935 | 0.996841 | 0        | 3.23667  | 0        | 0        | 0        | 1.035907 | -0.04197 | NA       | 0.075256  | NA       | -0.19573 | NA       |
| AT1G36620 | AT1G36620 | 0        | 0        | 0        | 1.237247 | 3.974804 | 5.981045 | 7.114428 | 3.23667  | 0        | 0        | 0        | 1.035907 | 1.196171 | 0.055188 | 1.150839  | 0.074202 | 0.10638  | NA       |
| AT1G36622 | AT1G36622 | 2.377808 | 3.568492 | 5.150617 | 58.56301 | 67.57166 | 58.81361 | 48.02239 | 26.97225 | 63.45599 | 2.878607 | 2.660668 | 1.035907 | 3.315074 | 1.25E-11 | 2.915618  | 3.19E-11 | -0.43923 | 0.684126 |
| AT1G36630 | AT1G36630 | 0        | 0        | 0        | 1.649662 | 1.987402 | 3.987363 | 11.56095 | 6.47334  | 3.904984 | 0        | 0        | 0        | 0.976246 | 0.136885 | 0.207522  | 0.000683 | 0.098090 | NA       |
| AT1G36640 | AT1G36640 | 0        | 0        | 0        | 1.649662 | 1.987402 | 1.993682 | 1.778607 | 0        | 1.952492 | 0        | 0        | 0        | 0.918293 | NA       | 0.627028  | NA       | 0        | NA       |
| AT1G36650 | AT1G36650 | 0        | 0        | 0        | 0        | 0        | 0        | 0        | 0        | 0        | 0.959536 | 0        | 0        | 0        | NA       | 0         | NA       | 0.171512 | NA       |
| AT1G36660 | AT1G36660 | 0        | 0        | 0        | 0        | 0        | 0        | 0        | 1.07889  | 0        | 0        | 0        | 0        | 0        | NA       | 0.16673   | NA       | 0        | NA       |
| AT1G36670 | AT1G36670 | 0        | 0        | 0        | 0        | 0        | 0        | 0.889303 | 0        | 0        | 0.959536 | 0        | 0        | 0        | NA       | 0.13694   | NA       | 0.147196 | NA       |
| AT1G36675 | AT1G36675 | 0        | 1.784246 | 9.01358  | 2.474493 | 1.324935 | 4.984204 | 1.778607 | 4.31556  | 1.952492 | 17.27164 | 13.30334 | 12.43088 | -0.2892  | 0.698957 | -0.28875  | 0.719114 | 1.443198 | NA       |
| AT1G36680 | AT1G36680 | 3.566712 | 14.27397 | 3.862963 | 6.186234 | 6.624673 |          |          |          |          |          |          |          |          |          |           |          |          |          |

|           |           |          |          |          |          |          |          |          |          |          |          |          |          |          |          |          |          |          |          |
|-----------|-----------|----------|----------|----------|----------|----------|----------|----------|----------|----------|----------|----------|----------|----------|----------|----------|----------|----------|----------|
| AT1G36980 | AT1G36980 | 631.308  | 654.8183 | 618.0741 | 740.286  | 919.5046 | 616.0476 | 676.7599 | 608.4939 | 946.9586 | 739.802  | 888.6631 | 600.8258 | 0.251234 | 0.28723  | 0.223043 | 0.378291 | 0.219603 | 0.575003 |
| AT1G36990 | AT1G36990 | 211.6249 | 139.1712 | 126.1901 | 141.871  | 133.8184 | 116.6304 | 134.2848 | 147.8079 | 153.2706 | 109.3871 | 119.7301 | 143.991  | -0.27438 | 0.256225 | -0.13707 | 0.629743 | -0.35129 | 0.335913 |
| AT1G36992 | AT1G36992 | 0        | 0        | 0        | 0        | 0        | 0        | 0        | 0        | 0        | 0        | 0        | 0        | #N/A     | #N/A     | #N/A     | #N/A     | #N/A     | #N/A     |
| AT1G37000 | AT1G37000 | 0        | 0        | 0        | 0        | 0        | 0        | 0        | 0        | 0        | 0        | 1.330334 | 0        | 0        | NA       | 0        | NA       | 0.172362 | NA       |
| AT1G37007 | AT1G37007 | 0        | 0        | 0        | 0        | 0        | 0        | 0        | 0        | 0        | 0        | 0        | 0        | #N/A     | #N/A     | #N/A     | #N/A     | #N/A     | #N/A     |
| AT1G37010 | AT1G37010 | 0        | 0        | 0        | 0        | 0.996841 | 0        | 0        | 0        | 0        | 0        | 0        | 0        | 0.15625  | NA       | 0        | NA       | 0        | NA       |
| AT1G37012 | AT1G37012 | 0        | 0        | 0        | 0        | 0        | 0        | 0        | 0        | 0        | 0        | 1.330334 | 0        | 0        | NA       | 0        | NA       | 0.172362 | NA       |
| AT1G37015 | AT1G37015 | 0        | 1.784246 | 0        | 0        | 0        | 0        | 0        | 0        | 0        | 0        | 1.330334 | 0        | -0.27254 | NA       | -0.25305 | NA       | -0.03925 | NA       |
| AT1G37020 | AT1G37020 | 1.188904 | 0        | 0        | 0        | 0.662467 | 0        | 0        | 1.07889  | 0        | 0        | 0        | 1.035907 | -0.11244 | NA       | -0.03726 | NA       | -0.03194 | NA       |
| AT1G37030 | AT1G37030 | 1.188904 | 0        | 1.287654 | 0        | 0        | 0        | 2.66791  | 1.07889  | 0        | 0.959536 | 0        | 1.035907 | -0.57918 | NA       | 0.198788 | NA       | -0.07746 | NA       |
| AT1G37035 | AT1G37035 | 0        | 0        | 0        | 0        | 0.996841 | 0.889303 | 1.07889  | 0        | 0        | 0        | 0        | 0        | 0.143396 | NA       | 0.329961 | NA       | 0        | NA       |
| AT1G37036 | AT1G37036 | 0        | 0        | 0        | 0        | 0        | 0        | 0        | 0        | 0        | 0        | 0        | 0        | #N/A     | #N/A     | #N/A     | #N/A     | #N/A     | #N/A     |
| AT1G37037 | AT1G37037 | 0        | 0        | 0        | 0        | 0        | 0        | 0        | 0        | 0        | 0        | 0        | 0        | #N/A     | #N/A     | #N/A     | #N/A     | #N/A     | #N/A     |
| AT1G37038 | AT1G37038 | 0        | 0        | 0.412416 | 0        | 0        | 0        | 0        | 0        | 0        | 0        | 0        | 0        | 0.095918 | NA       | 0        | NA       | 0        | NA       |
| AT1G37040 | AT1G37040 | 2.377808 | 0        | 1.287654 | 0        | 0.662467 | 0        | 1.778607 | 0        | 0        | 0.959536 | 0        | 0        | -0.49992 | NA       | -0.2604  | NA       | -0.39684 | NA       |
| AT1G37045 | AT1G37045 | 1.188904 | 0        | 0        | 0        | 0        | 0        | 0        | 0        | 0        | 0        | 0        | 0        | -0.2184  | NA       | -0.20558 | NA       | -0.19918 | NA       |
| AT1G37050 | AT1G37050 | 0        | 0        | 0.412416 | 0.662467 | 0        | 0.889303 | 0        | 0.976246 | 0        | 1.330334 | 1.035907 | 0        | 0.193906 | NA       | 0.34809  | NA       | 0.402429 | NA       |
| AT1G37057 | AT1G37057 | 0        | 0        | 0.412416 | 0        | 0.996841 | 0        | 2.15778  | 0        | 0        | 0        | 0        | 0        | 0.221841 | NA       | 0.327559 | NA       | 0        | NA       |
| AT1G37060 | AT1G37060 | 0        | 0        | 0        | 0        | 0        | 1.778607 | 0        | 1.952492 | 1.919071 | 1.330334 | 0        | 0        | 0        | NA       | 0.611574 | NA       | 0.520274 | NA       |
| AT1G37063 | AT1G37063 | 0        | 0        | 0        | 0        | 0        | 0        | 0        | 0        | 0        | 0        | 0        | 0        | #N/A     | #N/A     | #N/A     | #N/A     | #N/A     | #N/A     |
| AT1G37070 | AT1G37070 | 0        | 0        | 0        | 0        | 0        | 1.778607 | 0        | 0.976246 | 0        | 0        | 1.035907 | 0        | 0        | NA       | 0.463781 | NA       | 0.176341 | NA       |
| AT1G37080 | AT1G37080 | 0        | 0        | 0        | 0        | 0.889303 | 0        | 0        | 0        | 0        | 0        | 0        | 0        | 0        | NA       | 0.160764 | NA       | 0        | NA       |
| AT1G37090 | AT1G37090 | 0        | 0        | 0        | 0.662467 | 0        | 0        | 0        | 0        | 0        | 0        | 0        | 0        | 0.128567 | NA       | 0        | NA       | 0        | NA       |
| AT1G37095 | AT1G37095 | 0        | 0        | 0        | 0        | 0        | 0        | 0        | 0        | 0        | 0        | 1.035907 | 0        | 0        | NA       | 0        | NA       | 0.172362 | NA       |
| AT1G37100 | AT1G37100 | 0        | 0        | 0        | 0        | 0        | 0.889303 | 0        | 0        | 0        | 0        | 2.071813 | 0        | 0        | NA       | 0.133076 | NA       | 0.29577  | NA       |
| AT1G37110 | AT1G37110 | 0        | 1.784246 | 0        | 0        | 0        | 0.889303 | 0        | 0        | 0        | 0        | 1.035907 | 0        | -0.29314 | NA       | -0.08881 | NA       | -0.06689 | NA       |
| AT1G37113 | AT1G37113 | 0        | 1.784246 | 0        | 0        | 0        | 0        | 0        | 0        | 0        | 0        | 0        | 0        | -0.2184  | NA       | -0.20558 | NA       | -0.19918 | NA       |
| AT1G37120 | AT1G37120 | 0        | 1.784246 | 0        | 0        | 0        | 0.889303 | 0        | 0        | 0        | 0        | 0        | 0        | -0.26522 | NA       | -0.08117 | NA       | -0.24296 | NA       |
| AT1G37130 | NIA2      | 6047.954 | 5300.995 | 4273.725 | 2879.073 | 2452.454 | 3451.063 | 2565.641 | 3053.259 | 2187.767 | 3440.895 | 2748.47  | 3443.353 | -0.81177 | 9.7E-06  | -0.97729 | 7.35E-08 | -0.68083 | 0.003072 |
| AT1G37140 | MCT1      | 0        | 0        | 0.412416 | 0        | 0        | 0        | 1.07889  | 0        | 0        | 0        | 0        | 0        | 0.064603 | NA       | 0.150774 | NA       | 0        | NA       |
| AT1G37150 | HC52      | 4.755616 | 3.568492 | 3.862963 | 6.598649 | 9.274542 | 8.971567 | 7.114428 | 4.31556  | 13.66744 | 8.635821 | 9.312338 | 4.143626 | 0.687868 | 0.254243 | 0.71748  | 0.26103  | 0.55507  | NA       |
| AT1G37160 | AT1G37160 | 0        | 0        | 0        | 0        | 0.996841 | 0        | 0        | 0        | 0        | 0        | 0        | 0        | 0.15625  | NA       | 0        | NA       | 0        | NA       |
| AT1G37162 | AT1G37162 | 0        | 0        | 0        | 0        | 0        | 0        | 1.07889  | 0        | 0        | 0        | 0        | 0        | 0        | NA       | 0.16673  | NA       | 0        | NA       |
| AT1G37170 | AT1G37170 | 0        | 0        | 0        | 0        | 0        | 0        | 0        | 0.976246 | 0        | 0        | 1.035907 | 0        | 0        | NA       | 0.14724  | NA       | 0.156349 | NA       |
| AT1G37180 | AT1G37180 | 0        | 0        | 0.662467 | 0        | 0        | 0        | 0        | 0        | 0        | 0        | 0        | 0        | 0.128567 | NA       | 0        | NA       | 0        | NA       |
| AT1G37190 | AT1G37190 | 0        | 0        | 0        | 0        | 0        | 0        | 0        | 0        | 0        | 0        | 0        | 0        | #N/A     | #N/A     | #N/A     | #N/A     | #N/A     | #N/A     |
| AT1G37200 | AT1G37200 | 1.188904 | 0        | 0        | 0        | 0        | 0        | 0        | 0        | 0        | 0        | 0        | 0        | -0.2184  | NA       | -0.20558 | NA       | -0.19918 | NA       |
| AT1G37210 | AT1G37210 | 0        | 0        | 0        | 0        | 0        | 0        | 0        | 0        | 0        | 0        | 0        | 0        | #N/A     | #N/A     | #N/A     | #N/A     | #N/A     | #N/A     |
| AT1G37275 | AT1G37275 | 0        | 0        | 0        | 0        | 0        | 0        | 0        | 0        | 0        | 0        | 0        | 0        | #N/A     | #N/A     | #N/A     | #N/A     | #N/A     | #N/A     |
| AT1G37340 | AT1G37340 | 0        | 0        | 0.412416 | 0        | 0        | 0.889303 | 2.15778  | 0        | 0        | 0        | 0        | 0        | 0.060454 | NA       | 0.493861 | NA       | 0        | NA       |
| AT1G37405 | AT1G37405 | 0        | 0        | 0.412416 | 1.324935 | 0.996841 | 1.778607 | 1.07889  | 0        | 0        | 0        | 0        | 0        | 0.496163 | NA       | 0.507273 | NA       | 0        | NA       |
| AT1G37471 | AT1G37471 | 0        | 0        | 0        | 0        | 0        | 0        | 1.07889  | 0        | 0        | 0        | 1.035907 | 0        | 0        | NA       | 0.157605 | NA       | 0.157555 | NA       |
| AT1G37537 | AT1G37537 | 0        | 0        | 0.662467 | 0        | 0.889303 | 0        | 0        | 0        | 0        | 0        | 0        | 0        | 0.097058 | NA       | 0.130384 | NA       | 0        | NA       |
| AT1G37603 | AT1G37603 | 0        | 1.287654 | 0        | 0        | 0        | 0        | 0        | 0        | 0        | 0        | 0        | 0        | -0.2184  | NA       | -0.20558 | NA       | -0.19918 | NA       |
| AT1G37669 | AT1G37669 | 0        | 0        | 0        | 0        | 0        | 0        | 0        | 0        | 0        | 0        | 0        | 0        | #N/A     | #N/A     | #N/A     | #N/A     | #N/A     | #N/A     |
| AT1G37735 | AT1G37735 | 0        | 0        | 0        | 0        | 0        | 0        | 1.07889  | 0        | 0        | 0        | 0        | 0        | 0        | NA       | 0.16673  | NA       | 0        | NA       |
| AT1G37801 | AT1G37801 | 0        | 0        | 0        | 0        | 0.889303 | 0        | 0        | 0        | 0        | 0        | 0        | 0        | 0        | NA       | 0.160764 | NA       | 0        | NA       |
| AT1G37867 | AT1G37867 | 0        | 0        | 0        | 0        | 0        | 0        | 0        | 0        | 0        | 0        | 0        | 0        | #N/A     | #N/A     | #N/A     | #N/A     | #N/A     | #N/A     |
| AT1G37933 | AT1G37933 | 0        | 0        | 0        | 0        | 0        | 0        | 1.07889  | 0        | 0.959536 | 0        | 0        | 0        | 0        | NA       | 0.156853 | NA       | 0.149599 | NA       |
| AT1G37999 | AT1G37999 | 3.566712 | 0        | 2.575309 | 0.824831 | 0        | 0.996841 | 0        | 0        | 0.959536 | 1.330334 | 5.179533 | 0        | -0.6642  | 0.320746 | -0.97453 | 0.127834 | 0.132018 | NA       |
| AT1G38065 | AT1G38065 | 114.1348 | 112.4075 | 87.5605  | 65.16166 | 71.54647 | 71.77254 | 56.91542 | 57.18117 | 42.95482 | 89.23681 | 86.47171 | 123.2729 | -0.57311 | 0.013828 | -0.95695 | 6.06E-05 | -0.06025 | 0.916422 |
| AT1G38131 | AT1G38131 | 133.1572 | 130.25   | 126.1901 | 71.76031 | 78.83361 | 76.75674 | 68.47637 | 80.91675 | 50.76479 | 107.468  | 94.45371 | 127.4165 | -0.75846 | 0.00026  | -0.93359 | 0.000016 | -0.22913 | 0.59649  |
| AT1G38140 | AT1G38140 | 0        | 0        | 0        | 0        | 0        | 0        | 0        | 0.976246 | 0        | 0        | 0        | 0        | 0        | NA       | 0.16673  | NA       | 0        | NA       |
| AT1G38149 | AT1G38149 | 0        | 0        | 0        | 0        | 0        | 0        | 0        | 0        | 0        | 0        | 0        | 0        | #N/A     | #N/A     | #N/A     | #N/A     | #N/A     | #N/A     |
| AT1G38158 | AT1G38158 | 1.188904 | 0        | 0        | 0        | 0        | 0        | 1.07889  | 0.976246 | 0        | 0        | 0        | 0        | -0.26995 | NA       | 0.138812 | NA       | -0.23175 | NA       |
| AT1G38167 | AT1G38167 | 1.188904 | 0        | 0        | 0        | 0        | 1.778607 | 0.976246 | 0        | 1.330334 | 0        | 0        | 0        | -0.30007 | NA       | 0.254602 | NA       | -0.01597 | NA       |
| AT1G38176 | AT1G38176 | 0        | 0        | 0        | 0        | 0        | 0.889303 | 0        | 0        | 0        | 0        | 0        | 0        | 0        | NA       | 0.160764 | NA       | 0        | NA       |
| AT1G38185 | AT1G38185 | 0        | 0        | 0        | 0        | 0        | 0.889303 | 0        | 0.959536 | 0        | 0        | 0        | 0        | 0        | NA       | 0.13694  | NA       | 0.147196 | NA       |
| AT1G38194 | AT1G38194 | 0        | 0        | 0        | 0        | 0        | 0.889303 | 0        | 0        | 0        | 0        | 0        | 0        | 0        | NA       | 0.160764 | NA       | 0        | NA       |
| AT1G38203 | AT1G38203 | 0        | 0        | 0        | 0        | 0        | 0        | 0        | 0        | 0        | 1.330334 | 0        | 0        | 0        | NA       | 0        | NA       | 0.172362 | NA       |
| AT1G38212 | AT1G38212 | 0        | 0        | 0        | 0        | 0        | 0        | 0        | 0        | 0        | 0        | 0        | 0        | #N/A     | #N/A     | #N/A     | #N/A     | #N/A     | #N/A     |
| AT1G38221 | AT1G38221 | 0        | 0        | 0        | 0        | 0.889303 | 0        | 1.919071 | 0        | 0        | 0        | 0        | 0        | 0        | NA       | 0.132627 | NA       | 0.281224 | NA       |
| AT1G38230 | AT1G38230 | 1.188904 | 0        | 0        | 0        | 0        | 0        | 0        | 0        | 0        | 1.330334 | 0        | 0        | -0.22006 | NA       | -0.20393 | NA       | 0.001199 | NA       |
| AT1G38240 | AT1G38240 | 0        | 0        | 0        | 0        | 0        | 0        | 0        | 0        | 0        | 0        | 1.035907 | 0        | 0        | NA       | 0        | NA       | 0.172362 | NA       |
| AT1G38250 | AT1G38250 | 0        | 0        | 0        | 0        | 0        | 0        | 0        | 0        | 0        | 0        | 0        | 0        | #N/A     | #N/A     | #N/A     | #N/A     | #N/A     | #N/A     |
| AT1G38260 | AT1G38260 | 0        | 0        | 0.662467 | 0        | 0        | 0        | 0        | 0        | 0        | 0        | 0        | 0        | 0.128567 | NA       | 0        | NA       | 0        | NA       |
| AT1G38270 | AT1G38270 | 0        | 0        | 0        | 0        | 0        | 0        | 0        | 0        | 0        | 0        | 0        | 0        | #N/A     | #N/A     | #N/A     | #N/A     | #N/A     | #N/A     |
| AT1G38280 | AT1G38280 | 0        | 0        | 0        | 0        | 0        | 0        | 0        | 0        | 0        | 1.330334 | 0        | 0        | 0        | NA       | 0        | NA       | 0.172362 | NA       |
| AT1G38290 | AT1G38290 | 0        | 0        | 0        | 0        | 0        | 0        | 0        | 0        | 0        | 0        | 0        | 0        | #N/A     | #N/A     | #N/A     | #N/A     | #N/A     | #N/A     |
| AT1G38300 | AT1G38300 | 1.188904 | 0        | 0        | 0        | 0        | 0        | 0        | 0        | 0        | 0        | 0        | 0        | -0.2184  | NA       | -0.20558 | NA       | -0.19918 | NA       |
| AT1G38310 | AT1G38310 | 0        | 0        | 0        | 0        | 0        | 0        | 0        | 0        | 0        | 0        | 0        | 0        | #N/A     | #N/A     | #N/A     | #N/A     | #N/A     | #N/A     |
| AT1G38320 | AT1G38320 | 0        | 0        | 0        | 0        | 0        | 0        | 0        | 0        | 0        | 0        | 0        | 0        | #N/A     | #N/A     | #N/A     | #N/A     | #N/A     | #N/A     |
| AT1G38330 | AT1G38330 | 0        | 0        | 0        | 0        | 0.889303 | 0        | 0        | 0        | 0        | 0        | 0        | 0        | 0        | NA       | 0.160764 | NA       | 0        | NA       |
| AT1G38340 | AT1G38340 | 0        |          |          |          |          |          |          |          |          |          |          |          |          |          |          |          |          |          |

|           |           |          |          |          |          |          |          |          |          |          |          |          |          |          |          |          |          |          |          |    |
|-----------|-----------|----------|----------|----------|----------|----------|----------|----------|----------|----------|----------|----------|----------|----------|----------|----------|----------|----------|----------|----|
| AT1G39830 | AT1G39830 | 1.188904 | 0        | 0        | 0        | 0        | 0        | 1.778607 | 0        | 0.976246 | 0        | 0        | 0        | -0.27573 | NA       | 0.258961 | NA       | -0.23093 | NA       |    |
| AT1G39910 | AT1G39910 | 0        | 0        | 0        | 0        | 0        | 0        | 0        | 0        | 0        | 0        | 0        | 0        | #N/A     | #N/A     | #N/A     | #N/A     | #N/A     | #N/A     |    |
| AT1G39900 | AT1G39900 | 1.188904 | 0        | 0        | 0        | 0        | 0        | 0.889303 | 0        | 0        | 0        | 0        | 0        | -0.20902 | NA       | -0.03919 | NA       | -0.19148 | NA       |    |
| AT1G40069 | AT1G40069 | 0        | 0        | 0        | 0        | 0        | 0        | 0        | 0        | 0        | 0        | 0        | 0        | #N/A     | #N/A     | #N/A     | #N/A     | #N/A     | #N/A     |    |
| AT1G40070 | AT1G40070 | 0        | 0        | 0        | 0        | 0        | 0        | 0        | 0        | 0        | 0        | 0        | 0        | #N/A     | #N/A     | #N/A     | #N/A     | #N/A     | #N/A     |    |
| AT1G40071 | AT1G40071 | 1.188904 | 0        | 0        | 0        | 0        | 0        | 0        | 0        | 0        | 0        | 0        | 0        | -0.2184  | NA       | -0.20558 | NA       | -0.19918 | NA       |    |
| AT1G40072 | AT1G40072 | 0        | 0        | 0        | 0        | 0        | 0        | 0        | 0        | 0        | 0        | 0        | 0        | #N/A     | #N/A     | #N/A     | #N/A     | #N/A     | #N/A     |    |
| AT1G40073 | AT1G40073 | 0        | 0        | 0        | 0        | 0        | 0        | 0        | 0        | 0        | 0        | 0        | 0        | #N/A     | #N/A     | #N/A     | #N/A     | #N/A     | #N/A     |    |
| AT1G40074 | AT1G40074 | 0        | 0        | 0        | 0        | 0        | 0        | 0.889303 | 0        | 0        | 0        | 0        | 1.035907 | 0        | NA       | 0.137906 | NA       | 0.15538  | NA       |    |
| AT1G40075 | AT1G40075 | 0        | 0        | 0        | 0        | 0.662467 | 0        | 0.889303 | 0        | 0        | 0        | 0        | 1.035907 | 0.099976 | NA       | 0.14456  | NA       | 0.164373 | NA       |    |
| AT1G40076 | AT1G40076 | 0        | 0        | 0        | 0        | 0        | 0        | 0        | 0        | 0        | 0        | 0        | 0        | #N/A     | #N/A     | #N/A     | #N/A     | #N/A     | #N/A     |    |
| AT1G40077 | AT1G40077 | 1.188904 | 0        | 0        | 0        | 0        | 0        | 0        | 0        | 0        | 0        | 1.035907 | -0.21339 | NA       | -0.19896 | NA       | -0.02174 | NA       | NA       |    |
| AT1G40078 | AT1G40078 | 0        | 0        | 0        | 0        | 0        | 0        | 0        | 0        | 0        | 0        | 0        | 0        | #N/A     | #N/A     | #N/A     | #N/A     | #N/A     | #N/A     |    |
| AT1G40079 | AT1G40079 | 0        | 0        | 0        | 0        | 0        | 0        | 0.889303 | 0        | 0        | 0        | 0        | 0        | 0        | NA       | 0.160764 | NA       | 0        | NA       |    |
| AT1G40080 | AT1G40080 | 0        | 0        | 0        | 0        | 0        | 0        | 0        | 0        | 0        | 0        | 0        | 0        | #N/A     | #N/A     | #N/A     | #N/A     | #N/A     | #N/A     |    |
| AT1G40081 | AT1G40081 | 0        | 0        | 0        | 0        | 0.662467 | 0        | 0        | 0        | 0        | 0        | 0        | 0        | 0.128567 | NA       | 0        | NA       | 0        | NA       |    |
| AT1G40083 | AT1G40083 | 0        | 0        | 0        | 0        | 0        | 0        | 0        | 0        | 0        | 0        | 0        | 0        | #N/A     | #N/A     | #N/A     | #N/A     | #N/A     | #N/A     |    |
| AT1G40084 | AT1G40084 | 0        | 0        | 0        | 0        | 0        | 0        | 0        | 0        | 0        | 0        | 0        | 0        | #N/A     | #N/A     | #N/A     | #N/A     | #N/A     | #N/A     |    |
| AT1G40085 | AT1G40085 | 0        | 0        | 0        | 0        | 0        | 0        | 0        | 0        | 0        | 0        | 0        | 0        | #N/A     | #N/A     | #N/A     | #N/A     | #N/A     | #N/A     |    |
| AT1G40087 | AT1G40087 | 0        | 0        | 0        | 0        | 0        | 0        | 1.778607 | 0        | 0.959536 | 0        | 0        | 0        | 0        | NA       | 0.262373 | NA       | 0.143228 | NA       |    |
| AT1G40089 | AT1G40089 | 15.45575 | 17.84246 | 11.58889 | 3.71174  | 3.312336 | 4.984204 | 19.56468 | 14.02557 | 4.88123  | 19.19071 | 6.65167  | 16.5745  | -1.4797  | 0.003771 | -0.15802 | 0.816606 | -0.02381 | NA       |    |
| AT1G40091 | AT1G40091 | 1.188904 | 0        | 0        | 0        | 0        | 0        | 0.889303 | 0        | 0        | 0        | 0        | 0        | -0.20902 | NA       | -0.03919 | NA       | -0.19148 | NA       |    |
| AT1G40093 | AT1G40093 | 0        | 0        | 0        | 0        | 0        | 0        | 0.889303 | 0        | 0        | 1.330334 | 0        | 0        | 0        | NA       | 0.141773 | NA       | 0.183636 | NA       |    |
| AT1G40095 | AT1G40095 | 0        | 0        | 0        | 0.412416 | 0        | 0        | 3.557214 | 0        | 0.976246 | 0.959536 | 1.330334 | 2.071813 | -0.02592 | NA       | 0.733461 | NA       | 0.675715 | NA       |    |
| AT1G40097 | AT1G40097 | 0        | 0        | 0        | 0.412416 | 0.662467 | 0        | 1.778607 | 0        | 0.976246 | 0        | 0        | 0        | 0        | 0.206295 | NA       | 0.491977 | NA       | 0        | NA |
| AT1G40099 | AT1G40099 | 0        | 0        | 0        | 0        | 0        | 0        | 1.07889  | 0        | 0        | 0        | 0        | 0        | 0        | NA       | 0.16673  | NA       | 0        | NA       |    |
| AT1G40100 | AT1G40100 | 0        | 0        | 0        | 0.412416 | 0        | 0        | 0        | 0        | 0        | 0        | 0        | 0        | 0.095918 | NA       | 0        | NA       | 0        | NA       |    |
| AT1G40101 | AT1G40101 | 1.188904 | 1.784246 | 0        | 0        | 1.987402 | 0.996841 | 3.557214 | 1.07889  | 0.976246 | 0        | 3.991002 | 1.035907 | -0.04209 | 0.959679 | 0.346775 | 0.648059 | 0.224346 | NA       |    |
| AT1G40103 | AT1G40103 | 1.188904 | 0        | 0        | 0        | 0.996841 | 0.996841 | 1.07889  | 0        | 0        | 0        | 0        | 0        | -0.08354 | NA       | 0.12199  | NA       | -0.23399 | NA       |    |
| AT1G40104 | AT1G40104 | 40.42273 | 30.33218 | 6.438272 | 5.361402 | 23.18635 | 6.977885 | 96.93408 | 52.86561 | 17.57243 | 17.27164 | 49.22236 | 46.61579 | -0.64567 | 0.34538  | 0.729888 | 0.298245 | 0.346486 | 0.786989 |    |
| AT1G40105 | AT1G40105 | 0        | 0        | 0        | 0        | 0        | 0        | 0        | 0        | 0        | 0        | 0        | 0        | #N/A     | #N/A     | #N/A     | #N/A     | #N/A     | #N/A     |    |
| AT1G40106 | AT1G40106 | 1.188904 | 0        | 0        | 0.662467 | 0.996841 | 0        | 0        | 0        | 0        | 0        | 0        | 0        | 0.073595 | NA       | -0.22874 | NA       | -0.22142 | NA       |    |
| AT1G40107 | AT1G40107 | 0        | 0        | 0        | 0.662467 | 0        | 0        | 0        | 0        | 0        | 0        | 0        | 0        | 0.128567 | NA       | 0        | NA       | 0        | NA       |    |
| AT1G40109 | AT1G40109 | 0        | 0        | 0        | 0.412416 | 0.662467 | 0        | 1.778607 | 0        | 0.959536 | 0        | 0        | 0        | 0        | 0.184769 | NA       | 0.300184 | NA       | 0.161429 | NA |
| AT1G40112 | AT1G40112 | 0        | 0        | 0        | 0.412416 | 0        | 0        | 0        | 0        | 0        | 0        | 0        | 0        | 0.095918 | NA       | 0        | NA       | 0        | NA       |    |
| AT1G40113 | AT1G40113 | 1.188904 | 0        | 0        | 1.324935 | 0        | 0.889303 | 1.07889  | 0        | 0        | 0        | 0        | 0        | 0.013964 | NA       | 0.112007 | NA       | -0.2229  | NA       |    |
| AT1G40115 | AT1G40115 | 0        | 0        | 0        | 0        | 0        | 0        | 0        | 0        | 0        | 0        | 0        | 0        | #N/A     | #N/A     | #N/A     | #N/A     | #N/A     | #N/A     |    |
| AT1G40117 | AT1G40117 | 0        | 0        | 0        | 0        | 0        | 0        | 1.07889  | 0        | 0        | 0        | 0        | 0        | 0        | NA       | 0.16673  | NA       | 0        | NA       |    |
| AT1G40118 | AT1G40118 | 0        | 0        | 0        | 0        | 0        | 0        | 0        | 0        | 0        | 1.330334 | 0        | 0        | 0        | NA       | 0        | NA       | 0.172362 | NA       |    |
| AT1G40119 | AT1G40119 | 0        | 0        | 0        | 0        | 0        | 0        | 0        | 0.976246 | 0.959536 | 0        | 0        | 0        | 0        | NA       | 0.146371 | NA       | 0.148275 | NA       |    |
| AT1G40121 | AT1G40121 | 1.188904 | 0        | 0        | 0.412416 | 0        | 0.889303 | 0        | 0        | 0        | 0        | 0        | 0        | -0.12978 | NA       | -0.04528 | NA       | -0.2092  | NA       |    |
| AT1G40123 | AT1G40123 | 0        | 0        | 0        | 0        | 0        | 0        | 0        | 0        | 0        | 0        | 0        | 0        | #N/A     | #N/A     | #N/A     | #N/A     | #N/A     | #N/A     |    |
| AT1G40124 | AT1G40124 | 0        | 0        | 0        | 0        | 0        | 0        | 0        | 0        | 0.959536 | 0        | 0        | 0        | 0        | NA       | 0        | NA       | 0.171512 | NA       |    |
| AT1G40125 | AT1G40125 | 0        | 0        | 0        | 0.412416 | 0.662467 | 0        | 0.889303 | 2.928738 | 0        | 0        | 0        | 0        | 0.190234 | NA       | 0.62642  | NA       | 0        | NA       |    |
| AT1G40127 | AT1G40127 | 0        | 1.784246 | 0        | 0        | 0        | 0.889303 | 1.07889  | 0        | 0        | 0        | 1.035907 | -0.33644 | NA       | 0.08923  | NA       | -0.07256 | NA       | NA       |    |
| AT1G40129 | AT1G40129 | 0        | 0        | 0        | 0        | 0        | 0        | 0        | 0        | 0        | 0        | 0        | 0        | #N/A     | #N/A     | #N/A     | #N/A     | #N/A     | #N/A     |    |
| AT1G40130 | AT1G40130 | 0        | 0        | 0        | 0        | 0        | 0        | 0        | 0        | 0        | 0        | 0        | 0        | #N/A     | #N/A     | #N/A     | #N/A     | #N/A     | #N/A     |    |
| AT1G40131 | AT1G40131 | 0        | 0        | 0        | 0        | 0        | 0.889303 | 1.07889  | 0        | 0        | 0        | 0        | 0        | 0        | NA       | 0.3225   | NA       | 0        | NA       |    |
| AT1G40133 | AT1G40133 | 0        | 0        | 0        | 0        | 0        | 0        | 0        | 0        | 0        | 0        | 0        | 0        | #N/A     | #N/A     | #N/A     | #N/A     | #N/A     | #N/A     |    |
| AT1G40135 | AT1G40135 | 0        | 0        | 0        | 0.662467 | 0        | 0.889303 | 0        | 0        | 0        | 1.035907 | 0.099976 | NA       | 0.14456  | NA       | 0.164373 | NA       | 0.164373 | NA       |    |
| AT1G40136 | AT1G40136 | 0        | 1.784246 | 0        | 0        | 0        | 0        | 0        | 0        | 0        | 1.330334 | 0        | -0.27254 | NA       | -0.25305 | NA       | -0.03925 | NA       | NA       |    |
| AT1G40137 | AT1G40137 | 0        | 0        | 0        | 0        | 0        | 0        | 0        | 0        | 0        | 1.330334 | 0        | 0        | 0        | NA       | 0        | NA       | 0.172362 | NA       |    |
| AT1G40139 | AT1G40139 | 0        | 0        | 0        | 0.662467 | 0        | 0        | 0        | 0        | 0        | 0        | 0        | 0        | 0.128567 | NA       | 0        | NA       | 0        | NA       |    |
| AT1G40141 | AT1G40141 | 0        | 0        | 0        | 0        | 0        | 0        | 0        | 0.976246 | 0        | 0        | 0        | 0        | 0        | NA       | 0.16673  | NA       | 0        | NA       |    |
| AT1G40143 | AT1G40143 | 0        | 0        | 0        | 0        | 0        | 0        | 0        | 0        | 0        | 0        | 0        | 0        | #N/A     | #N/A     | #N/A     | #N/A     | #N/A     | #N/A     |    |
| AT1G40150 | AT1G40150 | 0        | 0        | 0.412416 | 0        | 0        | 0        | 0        | 0        | 0        | 1.330334 | 0        | 0        | 0.067751 | NA       | 0        | NA       | 0.180865 | NA       |    |
| AT1G40230 | AT1G40230 | 0        | 0        | 0        | 0        | 0        | 0        | 0        | 0        | 0        | 0        | 0        | 0        | #N/A     | #N/A     | #N/A     | #N/A     | #N/A     | #N/A     |    |
| AT1G40310 | AT1G40310 | 0        | 0        | 0.662467 | 0.996841 | 0        | 1.07889  | 0        | 0        | 0        | 0        | 0        | 0        | 0.274912 | NA       | 0.172872 | NA       | 0        | NA       |    |
| AT1G40390 | AT1G40390 | 1.188904 | 0        | 0        | 0        | 0        | 0        | 0        | 0        | 0        | 0        | 0        | 0        | -0.2184  | NA       | -0.20558 | NA       | -0.19918 | NA       |    |
| AT1G40470 | AT1G40470 | 0        | 1.784246 | 0        | 0.662467 | 0        | 0.889303 | 0        | 0.976246 | 0        | 0        | 0        | 0        | -0.16032 | NA       | 0.080097 | NA       | -0.27581 | NA       |    |
| AT1G40630 | AT1G40630 | 0        | 0        | 0.662467 | 0        | 0        | 0        | 0        | 0        | 0        | 0        | 0        | 0        | 0.128567 | NA       | 0        | NA       | 0        | NA       |    |
| AT1G41115 | AT1G41115 | 0        | 0        | 0        | 0        | 0        | 0.889303 | 0        | 0        | 0        | 0        | 0        | 0        | 0        | NA       | 0.160764 | NA       | 0        | NA       |    |
| AT1G41600 | AT1G41600 | 0        | 0        | 0.412416 | 0        | 1.778607 | 0        | 0        | 0        | 0        | 1.035907 | 0.053273 | NA       | 0.279062 | NA       | 0.158506 | NA       | 0.158506 | NA       |    |
| AT1G41630 | AT1G41630 | 0        | 0        | 0        | 0        | 0.889303 | 0        | 0.959536 | 0        | 0        | 0        | 0        | 0        | 0        | NA       | 0.13694  | NA       | 0.147196 | NA       |    |
| AT1G41650 | AT1G41650 | 0        | 0        | 0        | 0        | 0        | 0        | 0.959536 | 0        | 0        | 0        | 0        | 0        | 0        | NA       | 0        | NA       | 0.171512 | NA       |    |
| AT1G41660 | AT1G41660 | 1.188904 | 0        | 0.412416 | 0        | 0        | 1.07889  | 0        | 0        | 0        | 0        | 0        | 0        | -0.13172 | NA       | -0.02794 | NA       | -0.21059 | NA       |    |
| AT1G41680 | AT1G41680 | 0        | 0        | 0        | 0        | 0        | 0        | 0        | 0        | 0        | 0        | 0        | 0        | #N/A     | #N/A     | #N/A     | #N/A     | #N/A     | #N/A     |    |
| AT1G41690 | AT1G41690 | 0        | 0        | 0        | 0        | 0        | 0        | 0        | 0        | 0        | 1.035907 | 0        | 0        | 0        | NA       | 0        | NA       | 0.172362 | NA       |    |
| AT1G41700 | AT1G41700 | 0        | 0        | 0        | 0        | 1.778607 | 0        | 0        | 0        | 0        | 1.035907 | 0        | 0        | 0        | NA       | 0.26262  | NA       | 0.150298 | NA       |    |
| AT1G41710 | AT1G41710 | 0        | 1.784246 | 0        | 0        | 0        | 0        | 2.15778  | 0        | 0        | 0        | 1.035907 | -0.28618 | NA       | 0.0854   | NA       | -0.06905 | NA       | NA       |    |
| AT1G41720 | AT1G41720 | 0        | 0        | 0        | 0        | 0        | 0        | 0        | 0        | 0        | 0        | 0        | 0        | #N/A     | #N/A     | #N/A     | #N/A     | #N/A     | #N/A     |    |
| AT1G41723 | AT1G41723 | 0        | 0        | 0        | 0        | 0        | 0        | 0        | 0        | 0        | 0        | 0        | 0        | #N/A     | #N/A     | #N/A     | #N/A     | #N/A     | #N/A     |    |
| AT1G41726 | AT1G41726 | 0        | 0        | 0        | 0        | 0        | 0        | 0        | 0        | 0        | 0        | 0        | 0        | #N/A     | #N/A     | #N/A     | #N/A     | #N/A     | #N/A     |    |
| AT1G41730 | AT1G41730 | 0        | 0        | 0        | 0        | 0        | 0        | 0        | 0        | 0        | 0        | 0        | 0        | #N/A     | #N/A     | #N/A     | #N/A     | #N/A     | #N/A     |    |
| AT1G41740 | AT1G41740 | 1.188904 | 0        | 0        | 0        | 0        | 0        | 0        | 0        | 0        | 0        | 0        | 0        | -0.2184  | NA       | -0.20558 | NA       | -0.19918 | NA       |    |
| AT1G41743 | AT1G41743 | 0        | 0        | 0.662467 | 0        | 0        |          |          |          |          |          |          |          |          |          |          |          |          |          |    |



|           |           |          |          |          |          |          |          |          |          |          |          |          |          |          |          |          |          |          |          |
|-----------|-----------|----------|----------|----------|----------|----------|----------|----------|----------|----------|----------|----------|----------|----------|----------|----------|----------|----------|----------|
| AT1G43030 | AT1G43030 | 0        | 0        | 0        | 0        | 0.662467 | 0        | 1.778607 | 0        | 0        | 0        | 0        | 0.091702 | NA       | 0.255494 | NA       | 0        | NA       |          |
| AT1G43040 | AT1G43040 | 0        | 0        | 0        | 1.237247 | 0        | 0        | 0.889303 | 2.15778  | 0.976246 | 1.919071 | 0        | 0.208126 | NA       | 0.593239 | NA       | 0.314877 | NA       |          |
| AT1G43050 | AT1G43050 | 0        | 0        | 0        | 0        | 0        | 0        | 0.889303 | 0        | 0        | 0        | 0        | 0        | NA       | 0.160764 | NA       | 0        | NA       |          |
| AT1G43060 | AT1G43060 | 4.755616 | 0        | 2.575309 | 1.237247 | 1.987402 | 1.993682 | 8.003731 | 4.31556  | 1.952492 | 8.635821 | 3.991002 | 7.251346 | -0.41225 | 0.574968 | 0.515892 | 0.489485 | 0.8612   | NA       |
| AT1G43070 | AT1G43070 | 0        | 0        | 0        | 0.412416 | 0        | 0        | 0.889303 | 0        | 0        | 0        | 0        | 0        | 0.066991 | NA       | 0.136991 | NA       | 0        | NA       |
| AT1G43080 | AT1G43080 | 0        | 0        | 0        | 0        | 0        | 0        | 0        | 0        | 0        | 0        | 0        | 0        | #N/A     | #N/A     | #N/A     | #N/A     | #N/A     | #N/A     |
| AT1G43090 | AT1G43090 | 0        | 0        | 0        | 0        | 0        | 0        | 0.889303 | 0        | 0        | 0        | 0        | 0        | 0        | NA       | 0.160764 | NA       | 0        | NA       |
| AT1G43100 | AT1G43100 | 0        | 1.784246 | 0        | 0        | 0        | 0        | 0        | 0        | 0        | 0        | 0        | 0        | -0.2184  | NA       | -0.20558 | NA       | -0.19918 | NA       |
| AT1G43110 | AT1G43110 | 0        | 0        | 0        | 0        | 0        | 0.996841 | 0        | 0        | 0        | 0        | 0        | 0        | 0.15625  | NA       | 0        | NA       | 0        | NA       |
| AT1G43120 | AT1G43120 | 0        | 0        | 0        | 0        | 0        | 0        | 0        | 0        | 0        | 0        | 0        | 0        | #N/A     | #N/A     | #N/A     | #N/A     | #N/A     | #N/A     |
| AT1G43130 | LCV2      | 215.1916 | 303.3218 | 333.5025 | 454.0695 | 435.241  | 424.6542 | 358.3893 | 393.7948 | 277.2539 | 258.1151 | 242.1208 | 188.535  | 0.613598 | 0.002161 | 0.26847  | 0.250307 | -0.29496 | 0.397989 |
| AT1G43140 | AT1G43140 | 0        | 0        | 0        | 0        | 0        | 0        | 0.889303 | 0        | 0.959536 | 0        | 1.035907 | 0        | 0        | NA       | 0.161651 | NA       | 0.351496 | NA       |
| AT1G43145 | AT1G43145 | 0        | 0        | 0        | 0        | 0        | 0        | 0        | 0        | 0        | 0        | 0        | 0        | #N/A     | #N/A     | #N/A     | #N/A     | #N/A     | #N/A     |
| AT1G43150 | AT1G43150 | 1.188904 | 0        | 0        | 0        | 0        | 0        | 0.889303 | 0        | 0.959536 | 0        | 2.071813 | -0.30278 | NA       | -0.06534 | NA       | 0.292287 | NA       | NA       |
| AT1G43160 | RAP2-6    | 1.188904 | 3.568492 | 0        | 13.1973  | 11.92441 | 14.95261 | 11.86779 | 8.786214 | 0.959536 | 0        | 1.035907 | 2.009954 | 0.000357 | 2.211568 | 9.59E-05 | -0.35252 | NA       | NA       |
| AT1G43170 | ARP1      | 5271.6   | 5004.81  | 5091.385 | 4815.777 | 4308.025 | 4298.377 | 3631.915 | 4120.281 | 5091.123 | 4356.292 | 3412.307 | 5124.63  | -0.19142 | 0.319203 | -0.25406 | 0.189273 | -0.24812 | 0.38665  |
| AT1G43171 | AT1G43171 | 0        | 0        | 0        | 0        | 0        | 0        | 0        | 2.15778  | 0        | 0        | 0        | 0        | 0        | 0        | 0.266481 | NA       | 0        | NA       |
| AT1G43180 | AT1G43180 | 7.133424 | 8.92123  | 9.01358  | 12.78488 | 13.91181 | 14.95261 | 12.45025 | 11.86779 | 6.833722 | 4.797678 | 9.312338 | 10.35907 | 0.614693 | 0.234156 | 0.257903 | 0.685308 | -0.04146 | NA       |
| AT1G43190 | PTB3      | 656.2575 | 506.7259 | 525.363  | 507.2712 | 496.188  | 559.2277 | 576.2687 | 516.7883 | 475.4318 | 489.3632 | 564.0616 | 582.1795 | -0.11607 | 0.51391  | -0.10789 | 0.572191 | -0.05021 | 0.888866 |
| AT1G43195 | AT1G43195 | 0        | 0        | 0        | 0        | 0        | 0        | 0        | 0        | 0        | 0        | 0        | 0        | #N/A     | #N/A     | #N/A     | #N/A     | #N/A     | #N/A     |
| AT1G43200 | AT1G43200 | 0        | 0        | 0        | 0        | 0.662467 | 0        | 0.889303 | 0        | 0        | 0        | 0        | 0        | 0.097058 | NA       | 0.130384 | NA       | 0        | NA       |
| AT1G43205 | AT1G43205 | 0        | 0        | 0        | 0.412416 | 0        | 0        | 0        | 0        | 0        | 0        | 0        | 0        | 0.095918 | NA       | 0        | NA       | 0        | NA       |
| AT1G43210 | AT1G43210 | 2.377808 | 0        | 0        | 0        | 0        | 0        | 0        | 0        | 0        | 0        | 0        | 0        | -0.32938 | NA       | -0.31889 | NA       | -0.31551 | NA       |
| AT1G43220 | AT1G43220 | 0        | 0        | 0        | 0.412416 | 0        | 0        | 0.889303 | 1.07889  | 0        | 0        | 0        | 1.035907 | 0.058291 | NA       | 0.343513 | NA       | 0.183181 | NA       |
| AT1G43230 | AT1G43230 | 0        | 0        | 0        | 0        | 0        | 0        | 0        | 0        | 0        | 0        | 0        | 0        | #N/A     | #N/A     | #N/A     | #N/A     | #N/A     | #N/A     |
| AT1G43240 | AT1G43240 | 1.188904 | 0        | 0        | 0        | 0        | 0.996841 | 0        | 0        | 0        | 0        | 1.330334 | 0        | -0.06079 | NA       | -0.21623 | NA       | -0.00394 | NA       |
| AT1G43245 | SDG41     | 92.73451 | 114.1917 | 64.38272 | 64.33683 | 78.83361 | 83.73463 | 91.59826 | 78.75897 | 58.57476 | 66.20796 | 89.13238 | 70.44164 | -0.24379 | 0.41532  | -0.21745 | 0.504247 | -0.24703 | 0.624674 |
| AT1G43250 | AT1G43250 | 1.188904 | 0        | 3.862963 | 0.824831 | 1.324935 | 1.993682 | 3.557214 | 2.15778  | 0        | 4.797678 | 1.330334 | 2.071813 | -0.21532 | 0.788076 | 0.046597 | 0.958596 | 0.320315 | NA       |
| AT1G43260 | AT1G43260 | 0        | 0        | 0        | 0        | 0        | 0        | 0        | 1.07889  | 0.976246 | 0        | 0        | 2.071813 | 0        | NA       | 0.325048 | NA       | 0.334927 | NA       |
| AT1G43270 | AT1G43270 | 1.188904 | 0        | 0        | 0        | 0.996841 | 0.889303 | 0        | 0        | 1.919071 | 0        | 0        | 0        | -0.0795  | NA       | -0.05746 | NA       | 0.109038 | NA       |
| AT1G43280 | AT1G43280 | 0        | 0        | 0        | 0        | 0        | 0        | 0.889303 | 0        | 0        | 0        | 0        | 0        | 0        | NA       | 0.160764 | NA       | 0        | NA       |
| AT1G43290 | AT1G43290 | 0        | 0        | 0        | 0        | 0        | 0        | 0        | 0        | 0        | 0        | 0        | 0        | #N/A     | #N/A     | #N/A     | #N/A     | #N/A     | #N/A     |
| AT1G43300 | AT1G43300 | 0        | 1.784246 | 0        | 0        | 0        | 0        | 1.778607 | 0        | 0        | 0        | 0        | 0        | -0.25988 | NA       | 0.05432  | NA       | -0.23333 | NA       |
| AT1G43310 | AT1G43310 | 40.42273 | 28.54794 | 32.19136 | 24.33252 | 18.54908 | 17.94313 | 22.23259 | 23.73558 | 15.61994 | 20.15025 | 30.59768 | 21.75404 | -0.66229 | 0.062257 | -0.67026 | 0.081212 | -0.47292 | 0.43508  |
| AT1G43320 | AT1G43320 | 0        | 0        | 0        | 0        | 0        | 0        | 0        | 0        | 0        | 0        | 0        | 0        | #N/A     | #N/A     | #N/A     | #N/A     | #N/A     | #N/A     |
| AT1G43330 | AT1G43330 | 1.188904 | 0        | 0        | 0        | 0        | 0        | 0        | 0        | 0        | 0        | 0        | 0        | -0.2184  | NA       | -0.20558 | NA       | -0.19918 | NA       |
| AT1G43387 | AT1G43387 | 0        | 1.784246 | 0        | 0        | 0        | 0        | 0.889303 | 1.07889  | 0        | 0.959536 | 0        | 0        | -0.33632 | NA       | 0.089675 | NA       | -0.07947 | NA       |
| AT1G43415 | AT1G43415 | 0        | 0        | 0        | 0        | 0        | 0        | 0        | 0        | 0        | 0        | 0        | 0        | #N/A     | #N/A     | #N/A     | #N/A     | #N/A     | #N/A     |
| AT1G43444 | AT1G43444 | 1.188904 | 1.784246 | 0        | 0.412416 | 0        | 0        | 0.889303 | 0        | 0        | 0        | 0        | 0        | -0.40146 | NA       | -0.29287 | NA       | -0.48079 | NA       |
| AT1G43502 | AT1G43502 | 1.188904 | 0        | 0        | 0        | 0        | 0        | 0        | 2.15778  | 0        | 0        | 0        | 2.071813 | -0.23669 | NA       | 0.113049 | NA       | 0.114332 | NA       |
| AT1G43560 | Aly2      | 618.2301 | 667.308  | 648.9778 | 536.5527 | 702.8778 | 499.4172 | 783.4764 | 559.9439 | 818.0941 | 885.6514 | 991.0988 | 878.4487 | -0.14887 | 0.483389 | 0.158396 | 0.474807 | 0.499463 | 0.037869 |
| AT1G43570 | AT1G43570 | 0        | 0        | 0        | 0        | 0        | 0        | 0.889303 | 0        | 0        | 0        | 0        | 0        | 0        | NA       | 0.160764 | NA       | 0        | NA       |
| AT1G43575 | AT1G43575 | 0        | 0        | 0        | 0        | 0        | 1.993682 | 0        | 0        | 0        | 0        | 0        | 0        | 0.249001 | NA       | 0        | NA       | 0        | NA       |
| AT1G43580 | AT1G43580 | 300.7927 | 328.3013 | 271.6951 | 227.6534 | 238.4882 | 276.1249 | 222.3259 | 241.6713 | 237.2278 | 239.8839 | 191.5681 | 240.3303 | -0.27815 | 0.095015 | -0.35171 | 0.040154 | -0.40519 | 0.073815 |
| AT1G43590 | AT1G43590 | 3.566712 | 12.48972 | 10.30123 | 7.011065 | 7.949607 | 10.96525 | 8.893035 | 1.07889  | 4.88123  | 7.676285 | 6.65167  | 2.071813 | 0.011234 | 0.988865 | -0.53034 | 0.439136 | -0.45758 | NA       |
| AT1G43600 | AT1G43600 | 0        | 0        | 0        | 0        | 0        | 0        | 0        | 0        | 0.959536 | 0        | 0        | 0        | 0        | NA       | 0        | NA       | 0.171512 | NA       |
| AT1G43610 | AT1G43610 | 0        | 0        | 0        | 0        | 0.996841 | 0        | 1.07889  | 0        | 0        | 0        | 0        | 0        | 0.134295 | NA       | 0.152414 | NA       | 0        | NA       |
| AT1G43620 | UGT80B1   | 345.971  | 367.5547 | 347.6667 | 354.6774 | 302.7475 | 346.9006 | 373.5075 | 455.2916 | 311.4225 | 282.1035 | 379.1452 | 295.2334 | -0.07608 | 0.738767 | 0.101512 | 0.663607 | -0.15007 | 0.673631 |
| AT1G43624 | AT1G43624 | 0        | 0        | 0        | 0        | 0        | 0        | 0        | 0        | 0        | 0        | 0        | 0        | #N/A     | #N/A     | #N/A     | #N/A     | #N/A     | #N/A     |
| AT1G43630 | AT1G43630 | 0        | 0        | 0        | 0        | 0        | 0        | 0        | 0        | 0        | 0        | 0        | 1.035907 | 0        | NA       | 0        | NA       | 0.172362 | NA       |
| AT1G43640 | TULP5     | 0        | 1.784246 | 0        | 0        | 0        | 0        | 0.889303 | 1.07889  | 0        | 0        | 0        | 0        | -0.31639 | NA       | 0.095554 | NA       | -0.27438 | NA       |
| AT1G43650 | AT1G43650 | 34.47821 | 16.05821 | 38.62963 | 11.54764 | 9.937009 | 8.971567 | 13.33955 | 15.10446 | 15.61994 | 47.01725 | 23.94601 | 21.75404 | -1.36209 | 0.000771 | -0.92131 | 0.035808 | 0.042393 | 0.970058 |
| AT1G43660 | AT1G43660 | 0        | 1.784246 | 0        | 0        | 0        | 0        | 0        | 0        | 0        | 0        | 0        | 0        | -0.2184  | NA       | -0.20558 | NA       | -0.19918 | NA       |
| AT1G43665 | AT1G43665 | 0        | 0        | 0        | 0        | 0        | 0        | 0        | 0        | 0        | 0        | 0        | 0        | #N/A     | #N/A     | #N/A     | #N/A     | #N/A     | #N/A     |
| AT1G43666 | AT1G43666 | 0        | 0        | 0        | 0        | 0        | 0        | 0        | 0        | 0        | 0        | 0        | 0        | #N/A     | #N/A     | #N/A     | #N/A     | #N/A     | #N/A     |
| AT1G43667 | AT1G43667 | 0        | 0        | 0        | 0        | 0        | 0        | 0        | 0        | 0        | 0        | 0        | 0        | #N/A     | #N/A     | #N/A     | #N/A     | #N/A     | #N/A     |
| AT1G43670 | AT1G43670 | 1952.18  | 2241.013 | 2006.165 | 2081.461 | 2105.321 | 2021.593 | 3735.075 | 3608.887 | 4566.879 | 2572.515 | 2715.212 | 2489.283 | 0.003392 | 0.984612 | 0.934135 | 3.44E-16 | 0.324687 | 0.054184 |
| AT1G43675 | AT1G43675 | 17.83356 | 14.27397 | 10.30123 | 11.54764 | 15.23675 | 13.95577 | 45.35448 | 49.62894 | 65.40848 | 15.35257 | 22.61568 | 15.5386  | -0.10042 | 0.846087 | 1.75045  | 1.08E-06 | 0.258136 | 0.757919 |
| AT1G43680 | AT1G43680 | 0        | 0        | 0        | 0        | 0        | 0        | 0.976246 | 0        | 0        | 0        | 0        | 0        | 0        | NA       | 0.16673  | NA       | 0        | NA       |
| AT1G43690 | AT1G43690 | 494.584  | 462.1197 | 458.4049 | 388.9079 | 328.5838 | 414.6858 | 406.4117 | 426.1615 | 365.116  | 474.9701 | 514.8392 | 422.6499 | -0.32099 | 0.032319 | -0.23889 | 0.145695 | -0.00586 | 0.989371 |
| AT1G43700 | VIP1      | 458.9169 | 538.8423 | 536.9519 | 489.5373 | 527.9864 | 474.4962 | 567.3756 | 550.2339 | 513.5054 | 424.1147 | 440.3405 | 479.6247 | -0.0358  | 0.830967 | 0.090611 | 0.576534 | -0.18584 | 0.401389 |
| AT1G43710 | SDC       | 1071.202 | 1027.726 | 1040.425 | 745.2349 | 790.3235 | 727.6938 | 734.5647 | 759.5385 | 764.4006 | 925.9519 | 935.2248 | 835.9766 | -0.46878 | 1.99E-06 | -0.47287 | 2.66E-06 | -0.21907 | 0.15612  |
| AT1G43715 | AT1G43715 | 0        | 0        | 0        | 0        | 0        | 0        | 1.07889  | 0        | 0        | 0        | 0        | 0        | 0        | NA       | 0.16673  | NA       | 0        | NA       |
| AT1G43720 | AT1G43720 | 0        | 0        | 0        | 0        | 0        | 0        | 0        | 1.07889  | 0        | 0        | 0        | 0        | 0        | NA       | 0.16673  | NA       | 0        | NA       |
| AT1G43722 | AT1G43722 | 0        | 1.784246 | 0        | 0.662467 | 0        | 0.889303 | 0        | 0        | 0        | 0        | 0        | 0        | -0.13635 | NA       | -0.08681 | NA       | -0.2518  | NA       |
| AT1G43723 | AT1G43723 | 0        | 0        | 0        | 0        | 0        | 0        | 0        | 0        | 0        | 0        | 0        | 0        | #N/A     | #N/A     | #N/A     | #N/A     |          |          |





|           |           |          |          |          |          |          |          |          |          |          |          |          |          |          |          |          |          |          |          |      |
|-----------|-----------|----------|----------|----------|----------|----------|----------|----------|----------|----------|----------|----------|----------|----------|----------|----------|----------|----------|----------|------|
| AT1G45221 | AT1G45221 | 0        | 0        | 0        | 0        | 0        | 0        | 0        | 0        | 0.976246 | 0.959536 | 0        | 0        | 0        | NA       | 0.146371 | NA       | 0.148275 | NA       |      |
| AT1G45223 | AT1G45223 | 0        | 0        | 0        | 0        | 0.662467 | 0        | 0.889303 | 0        | 0        | 0        | 0        | 0        | 0        | 0.097058 | NA       | 0.130384 | NA       | 0        | NA   |
| AT1G45225 | AT1G45225 | 0        | 0        | 0        | 0        | 0        | 0        | 0        | 0        | 0        | 0        | 0        | 0        | 0        | #N/A     | #N/A     | #N/A     | #N/A     | #N/A     | #N/A |
| AT1G45227 | AT1G45227 | 0        | 0        | 0        | 0        | 0        | 0        | 0        | 0        | 0        | 0        | 0        | 0        | 0        | #N/A     | #N/A     | #N/A     | #N/A     | #N/A     | #N/A |
| AT1G45229 | AT1G45229 | 22.58917 | 21.41095 | 27.04074 | 28.04426 | 25.17376 | 14.95261 | 25.7898  | 24.81447 | 26.35864 | 23.02886 | 29.26735 | 27.96948 | -0.01901 | 0.968713 | 0.098765 | 0.84295  | 0.145622 | 0.86061  |      |
| AT1G45230 | AT1G45230 | 496.9618 | 494.2362 | 479.0074 | 526.6547 | 632.6562 | 522.3446 | 776.3619 | 602.0206 | 733.1607 | 641.9293 | 751.6387 | 615.3285 | 0.19114  | 0.25838  | 0.515652 | 0.000754 | 0.441442 | 0.028177 |      |
| AT1G45231 | AT1G45231 | 129.5905 | 151.6609 | 112.0259 | 177.3387 | 130.5061 | 164.4787 | 190.3109 | 162.9124 | 115.197  | 129.5373 | 138.3547 | 107.7643 | 0.264687 | 0.502375 | 0.252234 | 0.360403 | -0.05951 | 0.920166 |      |
| AT1G45233 | THOSA     | 130.7794 | 137.3869 | 104.3    | 131.973  | 125.2063 | 169.4629 | 173.4142 | 152.1235 | 131.7932 | 127.6182 | 78.4897  | 134.6783 | 0.184687 | 0.300332 | 0.291293 | 0.285014 | -0.10774 | 0.844625 |      |
| AT1G45234 | AT1G45234 | 3.566712 | 1.784246 | 2.575309 | 2.886909 | 1.324935 | 5.981045 | 0.889303 | 4.31556  | 3.904984 | 5.757214 | 6.65167  | 7.251346 | 0.104065 | 0.899195 | 0.051104 | 0.953694 | 0.817057 | NA       |      |
| AT1G45236 | AT1G45236 | 0        | 0        | 0        | 0.824831 | 1.324935 | 0        | 0        | 0        | 0        | 0        | 0        | 0        | 0.369064 | NA       | 0        | NA       | 0        | NA       |      |
| AT1G45238 | AT1G45238 | 0        | 1.784246 | 0        | 0        | 0.662467 | 0        | 0        | 0        | 0        | 0.959536 | 1.330334 | 0        | -0.16418 | NA       | -0.29041 | NA       | 0.124279 | NA       |      |
| AT1G45240 | AT1G45240 | 4.755616 | 0        | 1.287654 | 0.412416 | 0.662467 | 0.996841 | 0.889303 | 1.07889  | 0.976246 | 1.919071 | 1.330334 | 0        | -0.6565  | 0.333531 | -0.44928 | 0.544927 | -0.39795 | NA       |      |
| AT1G45242 | AT1G45242 | 0        | 1.784246 | 1.287654 | 0.824831 | 0        | 0        | 1.778607 | 1.07889  | 0.976246 | 0.959536 | 0        | 0        | -0.35892 | NA       | 0.17535  | NA       | -0.30448 | NA       |      |
| AT1G45243 | AT1G45243 | 0        | 0        | 0        | 0        | 0        | 0        | 0.996841 | 0        | 0        | 0        | 0        | 0        | 0.15625  | NA       | 0        | NA       | 0        | NA       |      |
| AT1G45244 | AT1G45244 | 0        | 0        | 3.862963 | 0.824831 | 0        | 0        | 0        | 0        | 3.23667  | 0.976246 | 0        | 0        | -0.41017 | NA       | 0.036402 | NA       | -0.53394 | NA       |      |
| AT1G45246 | AT1G45246 | 1.188904 | 0        | 0        | 0        | 0        | 0        | 0.889303 | 0        | 0        | 0        | 1.330334 | 0        | -0.24865 | NA       | -0.04956 | NA       | -0.00445 | NA       |      |
| AT1G45248 | AT1G45248 | 40.42273 | 41.03766 | 52.79383 | 33.81808 | 27.82363 | 34.88943 | 37.35075 | 47.47116 | 23.4299  | 43.1791  | 53.21336 | 54.90305 | -0.45352 | 0.164524 | -0.30012 | 0.421233 | 0.15505  | 0.815889 |      |
| AT1G45249 | ABF2      | 204.4915 | 235.5205 | 208.6    | 214.8685 | 227.2263 | 200.365  | 180.5286 | 196.358  | 196.2254 | 198.6239 | 184.9164 | 210.289  | -0.00252 | 0.990655 | -0.1702  | 0.356937 | -0.11514 | 0.715123 |      |
| AT1G45256 | AT1G45256 | 0        | 0        | 0        | 0        | 0        | 0        | 0        | 0        | 0.976246 | 0        | 0        | 0        | 0        | NA       | 0.16673  | NA       | 0        | NA       |      |
| AT1G45332 | MEF61     | 219.9472 | 196.2671 | 202.1617 | 248.2742 | 223.2515 | 238.2449 | 233.8868 | 239.5136 | 156.1994 | 147.7685 | 174.2738 | 193.7145 | 0.192763 | 0.380809 | 0.022136 | 0.937626 | -0.25948 | 0.453436 |      |
| AT1G45403 | AT1G45403 | 1.188904 | 0        | 0        | 0        | 0        | 0        | 0        | 0        | 0        | 0        | 0        | 0        | -0.2184  | NA       | -0.20558 | NA       | -0.19918 | NA       |      |
| AT1G45474 | LHCA5     | 913.0782 | 1095.527 | 1061.027 | 604.1888 | 640.6059 | 634.9876 | 909.7575 | 893.3209 | 1118.778 | 1154.321 | 1134.775 | 1212.011 | -0.6985  | 2.75E-08 | -0.06815 | 0.692667 | 0.19007  | 0.389402 |      |
| AT1G45545 | WEL2      | 51.12287 | 41.03766 | 27.04074 | 18.5587  | 24.51129 | 21.9305  | 25.7898  | 20.49891 | 25.3824  | 25.90746 | 39.91002 | 32.1131  | -0.82372 | 0.014577 | -0.67268 | 0.06801  | -0.2783  | 0.670495 |      |
| AT1G45616 | ATRLP6    | 2.377808 | 12.48972 | 0        | 4.536571 | 0        | 6.977885 | 6.225124 | 7.55223  | 7.809968 | 8.635821 | 6.65167  | 6.215439 | -0.1927  | 0.808017 | 0.408029 | 0.956058 | 0.406252 | NA       |      |
| AT1G45688 | AT1G45688 | 718.098  | 685.1505 | 630.9506 | 666.4636 | 622.0568 | 664.8928 | 467.7736 | 457.4493 | 426.6195 | 659.201  | 816.8251 | 587.359  | -0.05763 | 0.754664 | -0.5811  | 5.66E-05 | 0.017013 | 0.96566  |      |
| AT1G45760 | AT1G45760 | 0        | 0        | 0        | 0        | 0        | 0        | 0        | 0        | 0        | 0        | 0        | 0        | #N/A     | #N/A     | #N/A     | #N/A     | #N/A     | #N/A     |      |
| AT1G45832 | AT1G45832 | 0        | 0        | 0        | 0        | 0        | 0        | 0.889303 | 0        | 0.976246 | 0        | 0        | 0        | 0        | NA       | 0.309898 | NA       | 0        | NA       |      |
| AT1G45904 | AT1G45904 | 0        | 0        | 0        | 0        | 0        | 0        | 0.889303 | 0        | 0        | 0        | 0        | 0        | 0        | NA       | 0.160764 | NA       | 0        | NA       |      |
| AT1G45976 | SBP1      | 215.1916 | 249.7944 | 213.7506 | 322.9214 | 314.672  | 280.1123 | 273.9055 | 272.9592 | 357.306  | 225.4909 | 255.4241 | 203.0377 | 0.436873 | 0.011843 | 0.41154  | 0.024047 | 0.012308 | 0.981536 |      |
| AT1G46048 | AT1G46048 | 0        | 0        | 0        | 0        | 0        | 0        | 0        | 0        | 0        | 0        | 0        | 0        | #N/A     | #N/A     | #N/A     | #N/A     | #N/A     | #N/A     |      |
| AT1G46120 | AT1G46120 | 16.64466 | 7.136984 | 18.02716 | 7.011065 | 9.274542 | 4.984204 | 44.46517 | 30.20892 | 30.26363 | 13.4335  | 30.59768 | 14.50269 | -0.83981 | 0.076374 | 1.144409 | 0.008726 | 0.34511  | 0.691086 |      |
| AT1G46192 | AT1G46192 | 0        | 0        | 0        | 0        | 0        | 0        | 0        | 0        | 0        | 0        | 1.330334 | 1.035907 | 0        | NA       | 0        | NA       | 0.375122 | NA       |      |
| AT1G46264 | HSF84     | 74.90095 | 64.23286 | 55.36914 | 47.42779 | 55.64725 | 36.88311 | 41.79726 | 43.1556  | 46.85981 | 63.32935 | 73.16837 | 49.72351 | -0.44005 | 0.113695 | -0.537   | 0.067837 | -0.07054 | 0.91453  |      |
| AT1G46336 | AT1G46336 | 0        | 0        | 0        | 0        | 0        | 0        | 0        | 0        | 0        | 0        | 0        | 0        | #N/A     | #N/A     | #N/A     | #N/A     | #N/A     | #N/A     |      |
| AT1G46408 | AGL97     | 0        | 0        | 0        | 0.412416 | 0        | 0        | 0.889303 | 0        | 0        | 0        | 0        | 0        | 0.066991 | NA       | 0.136991 | NA       | 0        | NA       |      |
| AT1G46480 | WOX4      | 46.36725 | 30.33218 | 36.05432 | 25.98218 | 32.4609  | 27.91154 | 24.01119 | 19.42002 | 31.23987 | 53.734   | 27.93701 | 35.22082 | -0.37689 | 0.30704  | -0.55785 | 0.145688 | 0.051115 | 0.955173 |      |
| AT1G46552 | AT1G46552 | 8.322328 | 7.136984 | 7.725926 | 2.886909 | 1.987402 | 3.987363 | 3.557214 | 2.15778  | 2.928738 | 4.797678 | 9.312338 | 7.251346 | -0.13816 | 0.077639 | -0.9861  | 0.119376 | -0.10431 | NA       |      |
| AT1G46554 | AT1G46554 | 66.57862 | 71.36984 | 55.36914 | 49.48987 | 72.20893 | 63.79781 | 83.59453 | 75.5223  | 130.817  | 110.3466 | 83.81104 | 68.36983 | -0.06365 | 0.868154 | 0.559242 | 0.071475 | 0.425111 | 0.378228 |      |
| AT1G46624 | AT1G46624 | 1.188904 | 3.568492 | 0        | 0.412416 | 0        | 0        | 0.889303 | 0        | 0        | 0        | 0        | 0        | -0.6316  | NA       | -0.5056  | NA       | -0.47557 | NA       |      |
| AT1G46696 | AT1G46696 | 0        | 0        | 0        | 0        | 0        | 0        | 0        | 0        | 0.976246 | 0        | 0        | 0        | 0        | NA       | 0.16673  | NA       | 0        | NA       |      |
| AT1G46768 | RAP2-1    | 8.322328 | 23.1952  | 15.45185 | 18.97112 | 15.23675 | 14.95261 | 24.9005  | 12.94668 | 14.64369 | 12.47396 | 18.62468 | 12.43088 | 0.118486 | 0.832086 | 0.196404 | 0.734392 | -0.06684 | 0.955676 |      |
| AT1G46840 | AT1G46840 | 0        | 0        | 0        | 0        | 0        | 0        | 0        | 0        | 0        | 0        | 0        | 0        | #N/A     | #N/A     | #N/A     | #N/A     | #N/A     | #N/A     |      |
| AT1G46912 | AT1G46912 | 0        | 0        | 0        | 0        | 0        | 0        | 0        | 0        | 0        | 0        | 0        | 0        | #N/A     | #N/A     | #N/A     | #N/A     | #N/A     | #N/A     |      |
| AT1G46984 | AT1G46984 | 0        | 0        | 0        | 0.662467 | 0        | 0        | 1.07889  | 0        | 0        | 0        | 2.660668 | 0        | 0.081727 | NA       | 0.150165 | NA       | 0.348649 | NA       |      |
| AT1G47056 | VB1       | 202.1137 | 198.0513 | 195.7235 | 208.6823 | 229.2137 | 236.2513 | 244.5585 | 222.2513 | 188.4155 | 222.6123 | 250.1028 | 181.2836 | 0.169329 | 0.396603 | 0.134729 | 0.541046 | 0.126106 | 0.727711 |      |
| AT1G47128 | RD21A     | 4050.596 | 4897.755 | 4294.327 | 4661.121 | 3826.411 | 4484.787 | 5609.726 | 6430.184 | 5412.308 | 4401.39  | 3788.791 | 4523.804 | -0.02873 | 0.075944 | 0.393829 | 0.050125 | -0.05711 | 0.85769  |      |
| AT1G47200 | WPP2      | 174.7689 | 183.7773 | 224.0519 | 298.5889 | 287.5108 | 195.3808 | 188.5323 | 153.2024 | 329.9711 | 214.936  | 251.4331 | 218.5763 | 0.407754 | 0.154146 | 0.195074 | 0.559877 | 0.219498 | 0.676985 |      |
| AT1G47210 | CYCA3-2   | 174.7689 | 190.9143 | 194.4358 | 117.5384 | 125.8688 | 124.6051 | 114.7201 | 145.6501 | 88.83839 | 224.5313 | 171.6131 | 209.2531 | -0.59131 | 0.0028   | -0.66524 | 0.001148 | 0.117191 | 0.779875 |      |
| AT1G47220 | CYCA3-3   | 0        | 0        | 0        | 0        | 0        | 0        | 0        | 0        | 0        | 0        | 0        | 0        | #N/A     | #N/A     | #N/A     | #N/A     | #N/A     | #N/A     |      |
| AT1G47230 | CYCA3-4   | 99.86793 | 89.2123  | 90.1358  | 104.7536 | 112.6194 | 112.643  | 95.15547 | 86.3112  | 113.2445 | 98.83217 | 113.0784 | 98.41112 | 0.225515 | 0.308747 | 0.072243 | 0.797774 | 0.137405 | 0.746581 |      |
| AT1G47240 | NRAMP2    | 174.7689 | 144.5239 | 151.9432 | 103.5163 | 109.9696 | 136.5672 | 112.9415 | 101.4157 | 112.2683 | 131.4564 | 142.3457 | 157.4578 | -0.44266 | 0.020896 | -0.52031 | 0.009292 | -0.13173 | 0.736333 |      |
| AT1G47250 | PAF2      | 194.9802 | 233.7362 | 222.7642 | 306.0124 | 329.9087 | 293.0712 | 294.955  | 257.8547 | 346.5673 | 224.5313 | 167.6221 | 300.4129 | 0.501666 | 0.018315 | 0.45489  | 0.042311 | 0.094509 | 0.84648  |      |
| AT1G47260 | GAMMACA2  | 853.633  | 861.7908 | 915.5222 | 798.849  | 788.9985 | 826.381  | 692.9851 | 691.5685 | 781.973  | 842.4723 | 830.1284 | 943.7108 | -0.12423 | 0.329505 | -0.28486 | 0.017655 | -0.00751 | 0.982852 |      |
| AT1G47265 | AT1G47265 | 0        | 0        | 0        | 0        | 0        | 0        | 0.889303 | 1.07889  | 0        | 0        | 0        | 0        | 0        | NA       | 0.3225   | NA       | 0        | NA       |      |
| AT1G47270 | TULP6     | 164.0687 | 144.5239 | 157.0938 | 126.6116 | 107.9822 | 144.5419 | 160.9639 | 160.7546 | 147.4131 | 193.8262 | 118.1748 | 169.8887 | -0.30465 | 0.118242 | 0.005097 | 0.984929 | 0.304854 | 0.300873 |      |
| AT1G47271 | AT1G47271 | 0        | 3.568492 | 2.575309 | 2.744943 | 2.649869 | 0.996841 | 0.889303 | 0        | 0        | 0        | 2.660668 | 1.035907 | 0.121518 | 0.882347 | -0.07017 | 0.311833 | -0.27915 | NA       |      |
| AT1G47278 | AT1G47278 | 48.74506 | 60.66437 | 63.09506 | 122.4874 | 122.5564 | 102.6746 | 98.71269 | 72.28563 | 124.9595 | 69.08657 | 81.15037 | 82.87252 | 0.982494 | 0.020045 | 0.753123 | 0.003525 | 0.41446  | 0.323717 |      |
| AT1G47280 | AT1G47280 | 1.188904 | 1.784246 | 0        | 2.474493 | 1.987402 | 5.981045 | 0        | 2.15778  | 1.928738 | 0.959536 | 0        | 0.271813 | 0.814752 | 0.228878 | 0.26059  | 0.750873 | 0.023384 | NA       |      |



|           |           |          |          |          |          |          |          |          |          |          |          |          |           |          |          |           |          |          |          |
|-----------|-----------|----------|----------|----------|----------|----------|----------|----------|----------|----------|----------|----------|-----------|----------|----------|-----------|----------|----------|----------|
| AT1G48470 | GLN1-5    | 1.188904 | 1.784246 | 3.862963 | 1.237247 | 1.987402 | 1.993682 | 2.66791  | 2.15778  | 1.952492 | 1.919071 | 3.991002 | 0         | -0.22558 | 0.779631 | 0.001608  | 0.998631 | -0.13935 | NA       |
| AT1G48480 | RKL1      | 426.8165 | 324.6506 | 330.9272 | 169.0904 | 181.516  | 175.444  | 133.3955 | 196.358  | 206.9642 | 100.8895 | 283.3611 | 338.7414  | -1.14105 | 1.011-10 | -1.11442  | 6.474-10 | -0.33042 | 0.261783 |
| AT1G48490 | IRE3      | 406.6051 | 376.4759 | 321.9136 | 358.8015 | 306.0599 | 413.6889 | 433.9801 | 495.2105 | 325.0899 | 299.3751 | 258.0848 | 290.0538  | -0.03714 | 0.884987 | -0.177833 | 0.444182 | -0.371   | 0.214578 |
| AT1G48500 | TIFV6A    | 2.377808 | 14.27397 | 1.287654 | 5.361402 | 3.974804 | 2.990522 | 4.446517 | 4.31556  | 5.857476 | 9.595356 | 7.982004 | 6.215439  | -0.25096 | 0.73125  | -0.10579  | 0.898199 | 0.401424 | NA       |
| AT1G48510 | AT1G48510 | 0        | 0        | 0        | 0.412416 | 0        | 0        | 0.889303 | 0        | 0        | 0        | 0        | 0.1035907 | 0.066177 | NA       | 0.148539  | NA       | 0.168189 | NA       |
| AT1G48520 | GATB      | 910.7004 | 929.5922 | 988.9185 | 608.313  | 657.83   | 669.877  | 882.1891 | 831.8241 | 919.6237 | 1009.431 | 1011.054 | 1180.933  | -0.54525 | 1.41E-06 | -0.10219  | 0.47922  | 0.177244 | 0.361233 |
| AT1G48530 | AT1G48530 | 2.377808 | 0        | 0        | 0.412416 | 0        | 0        | 0.889303 | 0        | 0        | 0.976246 | 0        | 0         | -0.30842 | NA       | -0.21027  | NA       | -0.37694 | NA       |
| AT1G48540 | AT1G48540 | 836.9884 | 836.8114 | 799.6333 | 280.4426 | 278.8987 | 354.8753 | 501.5672 | 518.9461 | 335.8286 | 754.195  | 993.7595 | 782.1094  | -1.40623 | 2.51E-15 | -0.84623  | 4.68E-06 | 0.030698 | 0.951396 |
| AT1G48550 | AT1G48550 | 109.3792 | 137.3869 | 117.1765 | 160.8421 | 139.1181 | 140.5545 | 113.8308 | 102.4945 | 126.912  | 95.95356 | 91.79304 | 80.80071  | 0.288835 | 0.15668  | -0.0692   | 0.798866 | -0.41527 | 0.177771 |
| AT1G48560 | AT1G48560 | 48.74506 | 44.60615 | 64.38272 | 58.1506  | 45.04777 | 59.81045 | 68.47637 | 75.5223  | 63.45599 | 48.93632 | 55.87403 | 48.68761  | 0.031328 | 0.929344 | 0.366159  | 0.210844 | -0.05495 | 0.935568 |
| AT1G48570 | AT1G48570 | 310.3039 | 269.4212 | 297.4482 | 273.8439 | 333.221  | 275.1281 | 345.9391 | 295.6158 | 328.9949 | 281.1439 | 282.0308 | 294.1975  | 0.003262 | 0.987999 | -0.140682 | 0.441659 | -0.03711 | 0.92211  |
| AT1G48580 | AT1G48580 | 23.77808 | 21.41095 | 16.73951 | 19.79595 | 21.19895 | 11.96209 | 17.78607 | 16.18335 | 14.64369 | 16.31211 | 30.59768 | 24.86176  | -0.16953 | 0.727094 | -0.30723  | 0.535295 | 0.17345  | 0.846842 |
| AT1G48590 | AT1G48590 | 1.188904 | 0        | 0        | 0.824831 | 0.662467 | 0        | 4.446517 | 0        | 0        | 0        | 2.660668 | 0         | 0.013161 | 0.98536  | 0.013161  | 0.98536  | 0.139798 | NA       |
| AT1G48598 | CPuORF31  | 0        | 0        | 0        | 0.412416 | 0        | 0        | 0        | 0        | 0        | 0        | 0        | 0         | 0.095918 | NA       | 0         | NA       | 0        | NA       |
| AT1G48600 | NMT2      | 1.188904 | 1.784246 | 1.287654 | 0.412416 | 0        | 0        | 0        | 0        | 0        | 1.919071 | 0        | 0         | -0.63068 | NA       | -0.70592  | NA       | -0.28783 | NA       |
| AT1G48605 | HAL3B     | 21.40027 | 24.97944 | 28.3284  | 58.1506  | 62.93439 | 60.80729 | 37.35075 | 37.76115 | 32.21612 | 19.19071 | 18.62468 | 18.64632  | 1.219795 | 2.25E-05 | 0.487403  | 0.160999 | -0.36418 | 0.562251 |
| AT1G48610 | AT1G48610 | 155.7464 | 133.8185 | 131.3407 | 173.627  | 180.1911 | 136.5672 | 110.2736 | 105.7312 | 168.906  | 101.7108 | 170.2827 | 126.8806  | 0.215485 | 0.445123 | -0.12619  | 0.697196 | -0.08826 | 0.879579 |
| AT1G48620 | HON5      | 768.0319 | 567.3902 | 585.8827 | 548.9251 | 595.5581 | 535.3035 | 499.7886 | 567.4961 | 554.5077 | 510.473  | 560.0706 | 544.8868  | -0.19471 | 0.224832 | -0.24613  | 0.133108 | -0.25196 | 0.28611  |
| AT1G48625 | AT1G48625 | 0        | 0        | 0        | 0.662467 | 0        | 0        | 0        | 0        | 0        | 0.995936 | 0        | 0         | 0.098211 | NA       | 0         | NA       | 0.141904 | NA       |
| AT1G48630 | RACK1B    | 727.6092 | 603.0752 | 652.8408 | 443.7592 | 496.8505 | 504.4014 | 379.7326 | 393.7948 | 616.0112 | 569.9642 | 439.0102 | 636.0466  | -0.44696 | 0.035633 | -0.50036  | 0.012131 | -0.26174 | 0.47064  |
| AT1G48635 | PEX3-2    | 219.9472 | 240.8732 | 279.421  | 299.4137 | 310.0347 | 294.068  | 266.791  | 311.7992 | 261.6339 | 233.1672 | 247.4421 | 216.5045  | 0.284247 | 0.075533 | 0.177949  | 0.329885 | -0.08779 | 0.795239 |
| AT1G48640 | AT1G48640 | 0        | 0        | 0        | 1.237247 | 0        | 0        | 0        | 0        | 0        | 0        | 0        | 0         | 0.198023 | NA       | 0         | NA       | 0.141622 | NA       |
| AT1G48650 | AT1G48650 | 708.5868 | 653.034  | 646.4025 | 352.2029 | 319.9717 | 450.572  | 547.8109 | 634.3873 | 301.66   | 530.6232 | 622.5963 | 559.3895  | -0.81142 | 0.00043  | -0.42137  | 0.101235 | -0.22232 | 0.612836 |
| AT1G48660 | AT1G48660 | 7.133424 | 7.136984 | 3.862963 | 1.237247 | 1.324935 | 1.993682 | 5.335821 | 0        | 0.976246 | 3.838143 | 6.65167  | 4.143626  | -1.21715 | 0.055219 | -0.88036  | 0.205358 | -0.20637 | NA       |
| AT1G48670 | AT1G48670 | 0        | 0        | 0        | 0        | 0        | 0        | 1.07889  | 0        | 0        | 1.330334 | 0        | 0         | 0.160793 | NA       | 0         | NA       | 0.184979 | NA       |
| AT1G48680 | AT1G48680 | 0        | 0        | 0        | 0        | 0        | 0.996841 | 0        | 0        | 0        | 0        | 0        | 0         | 0.15625  | NA       | 0         | NA       | 0        | NA       |
| AT1G48690 | AT1G48690 | 1.188904 | 0        | 0        | 1.324935 | 0.996841 | 0.889303 | 0        | 0        | 0        | 0        | 0        | 0         | 0.17145  | NA       | -0.05963  | NA       | -0.22738 | NA       |
| AT1G48698 | AT1G48698 | 0        | 0        | 0        | 0        | 0        | 0.889303 | 0        | 0        | 0        | 0        | 0        | 0         | 0        | NA       | 0.160764  | NA       | 0        | NA       |
| AT1G48700 | AT1G48700 | 1.188904 | 0        | 0        | 0.412416 | 0        | 0        | 0        | 0        | 0        | 0        | 2.660668 | 0         | -0.14341 | NA       | -0.21882  | NA       | 0.172343 | NA       |
| AT1G48710 | AT1G48710 | 9.511232 | 10.70548 | 7.725926 | 10.31039 | 13.24935 | 15.94945 | 27.56841 | 15.10446 | 24.40615 | 8.635821 | 6.65167  | 6.215439  | 0.389298 | 0.462859 | 1.111413  | 0.01837  | -0.2833  | NA       |
| AT1G48720 | AT1G48720 | 0        | 0        | 0        | 0        | 0        | 0.996841 | 1.778607 | 3.23667  | 0        | 0.995936 | 0        | 0         | 0.074478 | NA       | 0.741388  | NA       | 0.333072 | NA       |
| AT1G48730 | AT1G48730 | 0        | 0        | 0        | 0        | 0        | 0        | 0        | 0        | 0        | 0        | 0        | 0         | #N/A     | #N/A     | #N/A      | #N/A     | #N/A     | #N/A     |
| AT1G48740 | AT1G48740 | 8.322328 | 0        | 5.150617 | 6.186234 | 6.624673 | 4.984204 | 4.446517 | 5.39445  | 3.904984 | 7.676285 | 3.991002 | 1.035907  | 0.226532 | 0.761038 | -0.05406  | 0.949656 | -0.11039 | NA       |
| AT1G48742 | MIR157D   | 0        | 0        | 0        | 0        | 0        | 0        | 0        | 0        | 0        | 0        | 0        | 0         | #N/A     | #N/A     | #N/A      | #N/A     | #N/A     | #N/A     |
| AT1G48745 | AT1G48745 | 55.87849 | 62.44861 | 48.93086 | 52.37678 | 66.24673 | 47.84836 | 52.46891 | 34.52448 | 49.78855 | 65.24842 | 67.84703 | 66.29802  | 0.008457 | 0.981205 | -0.25863  | 0.428069 | 0.25089  | 0.612544 |
| AT1G48750 | AT1G48750 | 0        | 0        | 0        | 0        | 0        | 0        | 0        | 0        | 0        | 0        | 0        | 0         | #N/A     | #N/A     | #N/A      | #N/A     | #N/A     | #N/A     |
| AT1G48760 | DELTA-ADR | 298.4149 | 201.6198 | 235.6407 | 174.8642 | 209.3397 | 210.3334 | 236.5547 | 231.9613 | 216.7266 | 226.4504 | 234.1388 | 238.2585  | -0.31958 | 0.079138 | -0.11093  | 0.620272 | -0.08375 | 0.833777 |
| AT1G48770 | AT1G48770 | 41.61164 | 33.90067 | 25.75309 | 39.5919  | 38.4231  | 27.91154 | 38.24005 | 42.07671 | 62.47974 | 34.54328 | 35.91902 | 42.47217  | -0.07476 | 0.857582 | 0.457283  | 0.205479 | 0.141402 | 0.850104 |
| AT1G48780 | AT1G48780 | 42.80054 | 44.60615 | 41.20494 | 36.29257 | 34.4483  | 32.89575 | 35.57214 | 35.60337 | 29.28738 | 39.34066 | 23.94601 | 39.36445  | -0.28154 | 0.391637 | -0.33123  | 0.348377 | -0.28075 | 0.62176  |
| AT1G48790 | AMSH1     | 567.1072 | 499.5889 | 565.2803 | 443.3467 | 386.2184 | 469.512  | 557.5933 | 514.6305 | 393.4271 | 518.1492 | 574.7043 | 442.3321  | -0.32642 | 0.067862 | -0.15381  | 0.461765 | -0.09047 | 0.807574 |
| AT1G48800 | TPS28     | 0        | 0        | 0        | 1.324935 | 0        | 0        | 0        | 0        | 0        | 0.995936 | 0        | 0.1035907 | 0.222719 | NA       | 0         | NA       | 0.320835 | NA       |
| AT1G48810 | AT1G48810 | 2.377808 | 5.352738 | 6.438272 | 7.835896 | 6.612075 | 5.981045 | 4.446517 | 4.31556  | 7.809968 | 10.55489 | 9.312338 | 9.323159  | 0.515002 | 0.399987 | 0.157442  | 0.838224 | 0.800999 | NA       |
| AT1G48820 | AT1G48820 | 756.1429 | 845.7326 | 928.3988 | 890.4052 | 1004.3   | 894.1662 | 699.8818 | 835.0608 | 1243.737 | 939.3854 | 693.104  | 1088.738  | 0.136074 | 0.611469 | 0.13072   | 0.647206 | 0.102985 | 0.836955 |
| AT1G48840 | AT1G48840 | 194.9802 | 221.2465 | 200.8741 | 204.1457 | 206.0273 | 221.2987 | 219.658  | 267.5647 | 160.1043 | 191.9071 | 216.8444 | 217.5404  | 0.033649 | 0.897325 | 0.068962  | 0.796401 | 0.022956 | 0.96566  |
| AT1G48850 | EMB1144   | 573.0517 | 583.4485 | 573.0062 | 669.3505 | 683.6652 | 645.9528 | 665.199  | 661.3595 | 685.3247 | 675.5131 | 666.4973 | 600.8258  | 0.209229 | 0.064189 | -0.217217 | 0.066686 | 0.166589 | 0.361573 |
| AT1G48860 | AT1G48860 | 507.662  | 408.5923 | 408.1864 | 335.7063 | 321.2966 | 331.948  | 304.1418 | 346.3237 | 396.3559 | 461.5366 | 409.7429 | 376.0341  | -0.41789 | 0.008856 | -0.33827  | 0.047845 | -0.08764 | 0.796877 |
| AT1G48870 | AT1G48870 | 15.45575 | 16.05821 | 14.1642  | 13.60971 | 7.28714  | 10.96525 | 17.78607 | 15.54867 | 13.4335  | 21.28534 | 19.68222 | 15.82222  | -0.43061 | 0.364484 | 0.304891  | 0.55504  | 0.212014 | NA       |
| AT1G48880 | TBL7      | 40.42273 | 71.36984 | 41.20494 | 47.42779 | 49.68505 | 40.87047 | 43.57587 | 52.86561 | 66.62227 | 46.05771 | 45.23135 | 45.57989  | -0.09667 | 0.785225 | 0.032744  | 0.935278 | -0.11638 | 0.860356 |
| AT1G48890 | AT1G48890 | 0        | 0        | 0        | 0.412416 | 1.324935 | 0.996841 | 0        | 0        | 0        | 0        | 0        | 0.1035907 | 0.515606 | NA       | 0         | NA       | 0.189806 | NA       |
| AT1G48900 | SRP-54C   | 584.9407 | 572.743  | 544.6778 | 614.4992 | 631.9938 | 611.0634 | 577.158  | 575.0483 | 597.4625 | 598.7502 | 748.978  | 573.8922  | 0.124718 | 0.407297 | 0.039174  | 0.831868 | 0.16881  | 0.467997 |
| AT1G48910 | YUC10     | 1.188904 | 0        | 0        | 0        | 0        | 0.889303 | 1.07889  | 0        | 0        | 0        | 0        | 0         | -0.26887 | NA       | 0.130815  | NA       | -0.23129 | NA       |
| AT1G48912 | AT1G48912 | 0        | 0        | 0        | 0        | 0        | 0        | 0        | 0        | 0        | 0        | 0        | 0         | #N/A     | #N/A     | #N/A      | #N/A     | #N/A     | #N/A     |
| AT1G48920 | NUCL1     | 3011.494 | 2647.821 | 2512.214 | 2464.183 | 2524.663 | 2611.723 | 2404.677 | 2659.464 | 3077.127 | 2377.729 | 2373.316 | 2483.068  | -0.10427 | 0.475838 | -0.00591  | 0.973817 | -0.17439 | 0.411386 |
| AT1G48930 | ATGHC91   | 0        | 0        | 1.287654 | 0.824831 | 3.12336  | 0.996841 | 0.889303 | 2.15778  | 3.904984 | 0        | 1.330334 | 0         | 0.543194 | 0.427473 | 0.732377  | 0.281209 | -0.06795 | NA       |
| AT1G48940 | ENODL6    | 0        | 0        | 0        | 0        | 0.996841 | 0        | 0        | 0        | 0        | 2.878607 | 0        | 0.2071813 | 0.109283 | NA       | 0         | NA       | 0.733383 | NA       |
| AT1G48950 | AT1G48950 | 241.3475 | 235.5205 | 225.3395 | 168.2656 | 147.0677 | 194.384  |          |          |          |          |          |           |          |          |           |          |          |          |

|           |           |          |           |          |          |          |          |          |          |          |          |          |          |           |          |           |          |           |          |
|-----------|-----------|----------|-----------|----------|----------|----------|----------|----------|----------|----------|----------|----------|----------|-----------|----------|-----------|----------|-----------|----------|
| AT1G49390 | AT1G49390 | 1.188904 | 0         | 5.150617 | 0.824831 | 0        | 0        | 0.889303 | 0        | 1.952492 | 1.919071 | 2.660668 | 3.10772  | -0.86877  | 0.186251 | -0.46168  | 0.536646 | 0.124367  | NA       |
| AT1G49400 | emb1129   | 178.3356 | 119.5445  | 157.0938 | 186.8243 | 216.6268 | 169.4629 | 195.6468 | 121.9146 | 192.3205 | 176.5546 | 178.2648 | 180.2747 | 0.313434  | 0.183292 | 0.151337  | 0.587107 | 0.024582  | 0.603215 |
| AT1G49405 | AT1G49405 | 8.322328 | 1.784246  | 1.287654 | 4.948897 | 9.274542 | 4.984204 | 2.666791 | 2.157778 | 0        | 0.388143 | 6.65167  | 2.071183 | 0.488425  | 0.489959 | -0.67371  | 0.356937 | 0.203347  | NA       |
| AT1G49410 | TOM6      | 262.7478 | 185.5616  | 258.8185 | 389.3203 | 432.5911 | 298.0554 | 277.4627 | 229.8036 | 451.0256 | 294.5774 | 391.1182 | 341.8492 | 0.631817  | 0.013916 | 0.414092  | 0.144199 | 0.508063  | 0.18801  |
| AT1G49420 | AT1G49420 | 0        | 0         | 0        | 0        | 0        | 0        | 0        | 0        | 0.889303 | 0        | 0        | 0        | 0         | 0        | 0         | 0        | 0         | NA       |
| AT1G49430 | LACS2     | 362.6157 | 405.0238  | 365.6938 | 294.4647 | 292.8105 | 359.8595 | 290.8022 | 219.0147 | 152.2944 | 418.3575 | 500.2056 | 466.1579 | -0.25332  | 0.272947 | -0.74813  | 0.000385 | 0.281792  | 0.4308   |
| AT1G49435 | LCR16     | 0        | 0         | 0        | 0        | 0        | 0        | 0        | 0        | 0        | 0        | 0        | 0        | 0         | NA       | 0         | NA       | 0.172362  | NA       |
| AT1G49440 | AT1G49440 | 0        | 0         | 0        | 0        | 0        | 0        | 0        | 0        | 0        | 0        | 1.330334 | 0        | 0         | NA       | 0         | NA       | 0.172362  | NA       |
| AT1G49450 | AT1G49450 | 35.66712 | 14.27397  | 23.17778 | 12.37247 | 11.92441 | 15.94945 | 16.00746 | 11.86779 | 6.833722 | 23.98839 | 15.96401 | 18.64632 | -0.80873  | 0.058111 | -0.95464  | 0.035136 | -0.30059  | 0.71872  |
| AT1G49460 | AT1G49460 | 0        | 0         | 0        | 0        | 0        | 0        | 0        | 0        | 0        | 0        | 0        | 0        | #N/A      | #N/A     | #N/A      | #N/A     | #N/A      | #N/A     |
| AT1G49470 | AT1G49470 | 150.9908 | 123.113   | 117.1765 | 128.2612 | 92.08295 | 86.72515 | 99.60199 | 96.0212  | 54.66978 | 110.3466 | 121.0604 | 92.19568 | -0.32401  | 0.250344 | -0.6181   | 0.024828 | -0.26843  | 0.575078 |
| AT1G49475 | AT1G49475 | 9.511232 | 17.136984 | 16.73951 | 9.897974 | 7.949607 | 6.977885 | 8.003731 | 9.710009 | 15.61994 | 6.716749 | 11.97301 | 10.35907 | -0.3485   | 0.540296 | -0.02335  | 0.97319  | -0.20217  | 0        |
| AT1G49480 | REM19     | 404.2273 | 449.63    | 415.9124 | 598.8274 | 637.956  | 585.1455 | 585.1617 | 600.9417 | 648.2273 | 428.9124 | 473.5989 | 429.9012 | 0.520833  | 7.23E-06 | 0.529363  | 7.79E-06 | 0.069901  | 0.793386 |
| AT1G49490 | PEX2      | 58.25629 | 58.88012  | 43.78025 | 9.897974 | 15.89921 | 20.93366 | 15.11816 | 28.05114 | 29.28738 | 47.01725 | 35.91902 | 35.22082 | -1.69257  | 3.14E-07 | -1.06559  | 0.002274 | -0.4021   | 0.498675 |
| AT1G49500 | AT1G49500 | 798.9435 | 1050.921  | 1001.795 | 911.8508 | 991.7135 | 779.5295 | 1137.419 | 825.3508 | 1780.673 | 1121.697 | 1843.843 | 1159.179 | -0.08263  | 0.810327 | 0.375086  | 0.211739 | 0.507415  | 0.209617 |
| AT1G49510 | emb1273   | 342.4043 | 417.5136  | 356.6803 | 277.9681 | 301.4226 | 298.0554 | 344.1604 | 343.087  | 354.3773 | 367.5021 | 303.3161 | 458.9066 | -0.33849  | 0.052341 | -0.09339  | 0.670073 | 0.025687  | 0.955367 |
| AT1G49520 | AT1G49520 | 76.08985 | 67.80135  | 47.64321 | 44.12847 | 43.06037 | 53.8294  | 72.03358 | 65.81229 | 44.90732 | 38.38143 | 45.23135 | 77.69299 | -0.42246  | 0.209152 | -0.06039  | 0.890464 | -0.22718  | 0.719598 |
| AT1G49530 | GGPP6     | 20.21137 | 23.1952   | 19.31482 | 18.14629 | 18.54908 | 14.95261 | 16.00746 | 29.13003 | 25.3824  | 19.19071 | 18.62468 | 11.39497 | -0.22785  | 0.622203 | -0.154378 | 0.765992 | -0.30488  | 0.700921 |
| AT1G49540 | ELP2      | 123.646  | 139.1712  | 132.6284 | 115.0639 | 116.5942 | 134.5735 | 125.3918 | 143.4924 | 72.2422  | 123.7801 | 77.15937 | 89.08796 | -0.10736  | 0.739601 | -0.20249  | 0.525056 | -0.41526  | 0.3256   |
| AT1G49550 | AT1G49550 | 0        | 0         | 0        | 0        | 0        | 0        | 0        | 0        | 0        | 0        | 0        | 0        | #N/A      | #N/A     | #N/A      | #N/A     | #N/A      | #N/A     |
| AT1G49560 | AT1G49560 | 126.0238 | 140.9554  | 130.0531 | 101.0418 | 88.10815 | 87.71299 | 134.2848 | 132.7035 | 110.3158 | 178.4736 | 152.9884 | 160.5655 | -0.49232  | 0.008957 | -0.06603  | 0.798407 | 0.313035  | 0.290325 |
| AT1G49570 | PER10     | 0        | 0         | 0        | 0        | 0        | 0.996841 | 0.889303 | 0        | 0        | 0.959536 | 0        | 0        | 0.134166  | NA       | 0.142573  | NA       | 0.15548   | NA       |
| AT1G49580 | CRK8      | 266.3145 | 185.5616  | 240.7914 | 155.0683 | 142.4305 | 159.4945 | 136.0634 | 181.2535 | 111.292  | 233.1672 | 238.1298 | 244.4739 | -0.5947   | 0.00272  | -0.68661  | 0.000732 | 0.037466  | 0.942666 |
| AT1G49590 | AT1G49590 | 184.2801 | 239.089   | 168.7099 | 231.3651 | 241.8006 | 213.3239 | 184.9751 | 222.2513 | 255.7765 | 186.1499 | 204.8714 | 205.1095 | -0.180459 | 0.368445 | -0.126239 | 0.576613 | -0.02392  | 0.961407 |
| AT1G49600 | RP47A     | 630.1191 | 563.8217  | 509.9111 | 486.6504 | 553.1602 | 489.4488 | 466.8843 | 565.3383 | 657.9898 | 421.2361 | 424.3765 | 481.6965 | -0.15399  | 0.405053 | -0.01294  | 0.955857 | -0.35423  | 0.141234 |
| AT1G49610 | AT1G49610 | 2.377808 | 0         | 0        | 2.062078 | 0.662467 | 0.996841 | 1.778607 | 2.157778 | 4.88123  | 0        | 5.321336 | 4.143626 | 0.104886  | 0.906631 | 0.661585  | 0.364321 | 0.681323  | 0        |
| AT1G49620 | KRP7      | 15.45575 | 14.27397  | 27.04074 | 34.64291 | 40.4105  | 14.95261 | 23.12189 | 28.05114 | 4.66978  | 24.94793 | 31.92802 | 23.82585 | 0.581165  | 0.206451 | 0.761503  | 0.10195  | 0.409453  | 0.612836 |
| AT1G49630 | PREP2     | 370.938  | 272.9896  | 298.7358 | 161.2545 | 146.4053 | 199.3682 | 217.8794 | 80.2258  | 159.1281 | 264.8318 | 228.8174 | 236.1867 | -0.88721  | 1.46E-06 | -0.67594  | 0.000462 | -0.3636   | 0.221141 |
| AT1G49640 | CXE3      | 0        | 0         | 1.287654 | 0.412416 | 0        | 0        | 0.889303 | 0        | 0        | 0        | 0        | 0        | -0.13688  | NA       | -0.0534   | NA       | -0.2182   | NA       |
| AT1G49650 | CXE4      | 165.2576 | 105.2705  | 122.3272 | 125.7868 | 137.1307 | 113.6398 | 136.9527 | 153.2024 | 224.5366 | 127.6182 | 122.3907 | 124.3088 | -0.06765  | 0.824385 | 0.363916  | 0.162905 | -0.07831  | 0.888502 |
| AT1G49660 | CXE5      | 143.8574 | 160.5821  | 166.1074 | 110.5274 | 82.14594 | 119.6209 | 133.3955 | 99.25787 | 144.4844 | 134.335  | 117.0694 | 161.6014 | -0.57524  | 0.009354 | -0.30341  | 0.229946 | -0.17523  | 0.687818 |
| AT1G49670 | NQR       | 385.2049 | 299.7533  | 372.1321 | 332.407  | 339.8457 | 385.7774 | 400.1866 | 402.4259 | 353.4011 | 281.1439 | 244.7815 | 372.9264 | -0.00744  | 0.976282 | 0.120977  | 0.596937 | -0.23045  | 0.471899 |
| AT1G49680 | AT1G49680 | 0        | 0         | 0        | 0        | 0        | 0        | 0        | 0        | 0        | 0        | 0        | 0        | #N/A      | #N/A     | #N/A      | #N/A     | #N/A      | #N/A     |
| AT1G49690 | AT1G49690 | 0        | 0         | 0        | 0        | 0        | 0        | 0        | 0        | 0        | 0        | 0        | 0        | #N/A      | #N/A     | #N/A      | #N/A     | #N/A      | #N/A     |
| AT1G49700 | AT1G49700 | 10.70014 | 12.48972  | 5.150617 | 5.773818 | 8.612075 | 5.981045 | 7.114428 | 5.39445  | 10.73871 | 8.635821 | 6.65167  | 4.143626 | -0.35537  | 0.56166  | -0.19441  | 0.784758 | -0.3922   | NA       |
| AT1G49710 | FUT12     | 179.5245 | 174.8561  | 181.5593 | 263.5336 | 245.1129 | 233.2607 | 201.8179 | 172.6224 | 176.7005 | 133.3755 | 156.9794 | 185.4273 | 0.464491  | 0.00647  | 0.040341  | 0.871033 | -0.17134  | 0.609275 |
| AT1G49715 | AT1G49715 | 0        | 0         | 0        | 0        | 0        | 0        | 0.889303 | 0        | 0        | 0        | 0        | 0        | 0         | NA       | 0.160764  | NA       | 0         | NA       |
| AT1G49720 | ABF1      | 208.0582 | 231.952   | 191.8605 | 320.0345 | 290.1607 | 350.888  | 394.8507 | 453.1338 | 420.762  | 178.4736 | 242.1208 | 226.8635 | 0.59619   | 0.000259 | 0.992634  | 2.91E-10 | 0.033419  | 0.940532 |
| AT1G49730 | AT1G49730 | 651.5194 | 708.3457  | 731.3877 | 562.1224 | 565.0846 | 681.8391 | 586.9403 | 557.7861 | 407.0946 | 604.5074 | 701.086  | 654.6929 | -0.20789  | 0.250238 | -0.42188  | 0.104039 | -0.09222  | 0.793379 |
| AT1G49740 | AT1G49740 | 214.0027 | 171.2876  | 166.6827 | 184.3498 | 199.4026 | 193.3871 | 200.9826 | 240.5925 | 262.6102 | 211.0978 | 301.9858 | 212.3608 | 0.05026   | 0.845832 | 0.33061   | 0.712025 | 0.366602  | 0.232885 |
| AT1G49750 | AT1G49750 | 2910.437 | 1841.342  | 1904.441 | 1284.675 | 1568.06  | 1060.541 | 1124.203 | 950.8636 | 1327.997 | 1295.745 | 1313.529 | 0        | -0.57707  | 0.001645 | -1.01837  | 1.17E-09 | -0.74166  | 0.000587 |
| AT1G49760 | PAB8      | 1222.193 | 967.0613  | 921.9605 | 546.0382 | 535.2736 | 631.0002 | 649.1915 | 691.5685 | 635.5361 | 765.7094 | 621.266  | 879.4846 | -0.84979  | 7.55E-08 | -0.64455  | 8.32E-05 | -0.44823  | 0.045467 |
| AT1G49770 | BHLH95    | 0        | 0         | 0        | 0        | 0        | 0        | 0.889303 | 0        | 0        | 0.995936 | 0        | 0        | 0         | NA       | 0.13694   | NA       | 0.1477196 | NA       |
| AT1G49780 | PUB26     | 127.2127 | 103.4863  | 72.10864 | 85.78244 | 64.92179 | 78.75042 | 67.58706 | 71.20674 | 104.4583 | 100.7512 | 94.45371 | 89.08796 | -0.38053  | 0.167663 | -0.30361  | 0.318107 | -0.08753  | 0.8849   |
| AT1G49790 | AT1G49790 | 3.566712 | 7.136984  | 6.438272 | 2.062078 | 3.312336 | 3.987363 | 2.66791  | 4.31556  | 4.88123  | 15.35257 | 1.330334 | 8.287252 | -0.6007   | 0.369586 | -0.33405  | 0.663788 | 0.462638  | NA       |
| AT1G49800 | AT1G49800 | 0        | 0         | 0        | 0.412416 | 0        | 0        | 0        | 0        | 0        | 0        | 0        | 0        | 0.095918  | NA       | 0.063788  | 0        | 0         | NA       |
| AT1G49810 | ATNH02    | 0        | 0         | 0        | 0        | 0        | 0.996841 | 0.889303 | 0        | 0        | 0        | 0        | 0        | 0.133712  | NA       | 0.142442  | NA       | 0.162658  | NA       |
| AT1G49820 | MTK       | 362.6157 | 381.8287  | 382.4333 | 537.7899 | 512.7497 | 514.3698 | 511.3495 | 499.526  | 422.7145 | 334.8779 | 303.3161 | 353.2441 | 0.471149  | 0.000279 | 0.344688  | 0.013569 | -0.1781   | 0.459905 |
| AT1G49830 | AT1G49830 | 5.94452  | 3.568492  | 5.150617 | 13.1973  | 13.91181 | 8.971567 | 11.56095 | 9.710009 | 13.66744 | 5.757214 | 7.982004 | 6.215439 | 1.005042  | 0.053967 | 0.931861  | 0.096432 | 0.256356  | NA       |
| AT1G49832 | AT1G49832 | 5.94452  | 8.92123   | 9.01358  | 10.31039 | 12.58688 | 8.971567 | 8.003731 | 5.39445  | 14.64369 | 10.55489 | 15.96401 | 6.215439 | 0.349944  | 0.555015 | 0.193279  | 0.718337 | 0.345262  | NA       |
| AT1G49840 | AT1G49840 | 141.4796 | 108.839   | 121.0935 | 99.80457 | 98.04516 | 104.6683 | 104.0485 | 87.39009 | 87.86214 | 96.9131  | 97.11438 | 108.7702 | -0.30262  | 0.13947  | -0.40774  | 0.056111 | -0.28485  | 0.369941 |
| AT1G49850 | AT1G49850 | 121.2682 | 114.1917  | 108.163  | 164.9662 | 201.3901 | 169.4629 | 171.6356 | 173.7013 | 177.6768 | 109.3871 | 98.44471 | 122.237  | 0.624972  | 0.00044  | 0.5909    | 0.001498 | -0.05314  | 0.910565 |
| AT1G49860 | GSTF14    | 2.377808 | 1.784246  | 0        | 6.186234 | 2.649869 | 1.993682 | 5.358211 | 5.39445  | 1.952492 | 4.97678  | 2.660668 | 3.10772  | 0.7067    | 0.303308 | 0.784258  | 0.271636 | 0.662764  | NA       |
| AT1G49870 | AT1G49870 | 77.27876 | 57.09587  | 60.51975 | 41.24156 | 43.72284 | 60.80729 | 52.46891 |          |          |          |          |          |           |          |           |          |           |          |

|           |            |          |          |          |          |          |          |          |          |          |          |          |          |          |          |           |           |          |          |
|-----------|------------|----------|----------|----------|----------|----------|----------|----------|----------|----------|----------|----------|----------|----------|----------|-----------|-----------|----------|----------|
| AT1G50360 | VIII-A     | 307.9261 | 235.5205 | 242.079  | 257.3473 | 222.589  | 320.9827 | 340.6032 | 323.667  | 211.8454 | 233.1672 | 215.5141 | 206.1454 | 0.018328 | 0.951527 | 0.148979  | 0.586391  | -0.25749 | 0.512446 |
| AT1G50370 | FYPP1      | 350.7267 | 349.7122 | 356.6803 | 381.4844 | 407.4174 | 356.869  | 389.5149 | 370.0592 | 380.7359 | 301.2942 | 255.4241 | 389.5009 | 0.115845 | 0.546528 | 0.107593  | 0.603764  | -0.15273 | 0.625371 |
| AT1G50380 | AT1G50380  | 244.9142 | 230.1677 | 146.7926 | 223.1168 | 207.3523 | 216.3144 | 214.5221 | 214.6991 | 242.109  | 151.6066 | 148.9974 | 198.8941 | 0.059001 | 0.824881 | 0.110023  | 0.680822  | -0.30173 | 0.389772 |
| AT1G50390 | AT1G50390  | 0        | 0        | 0        | 0.824831 | 0        | 0        | 1.778607 | 2.15778  | 2.928738 | 0.959536 | 3.991002 | 0        | 0.062353 | 0.935848 | 0.964713  | 0.117667  | 0.688216 | NA       |
| AT1G50400 | TO4M-0     | 3.566712 | 0        | 1.287654 | 3.71174  | 2.649869 | 3.987363 | 1.778607 | 3.23667  | 5.857476 | 3.838143 | 2.660668 | 1.035907 | 0.495117 | 0.495116 | 0.526261  | 0.488603  | 0.223577 | NA       |
| AT1G50410 | AT1G50410  | 355.4823 | 340.791  | 359.2556 | 311.3738 | 336.5334 | 367.8342 | 380.6219 | 393.7948 | 275.3014 | 310.8895 | 294.0038 | 293.1615 | -0.06038 | 0.773422 | -0.094087 | 0.968201  | -0.22398 | 0.417775 |
| AT1G50420 | SCL3       | 126.0238 | 90.99655 | 119.7519 | 169.0904 | 172.2415 | 172.4535 | 154.7388 | 153.2024 | 134.7219 | 99.79171 | 81.15037 | 91.15977 | 0.579242 | 0.001468 | 0.368504  | 0.071976  | -0.30847 | 0.344724 |
| AT1G50430 | DWF5       | 671.7307 | 793.9895 | 677.3062 | 1226.936 | 1158.655 | 1223.124 | 1029.813 | 1042.208 | 974.2935 | 574.7618 | 478.9202 | 593.5744 | 0.748623 | 1.74E-10 | 0.506273  | 0.394E-05 | -0.36776 | 0.303949 |
| AT1G50440 | AT1G50440  | 296.0371 | 330.0855 | 341.2284 | 408.7038 | 406.0924 | 418.6731 | 433.0908 | 422.9249 | 400.2609 | 262.9128 | 254.0938 | 289.0179 | 0.348666 | 0.002726 | 0.375926  | 0.00499   | -0.25523 | 0.225684 |
| AT1G50450 | AT1G50450  | 436.3277 | 437.1403 | 435.2272 | 318.3848 | 302.7475 | 312.0112 | 403.7438 | 411.0571 | 335.8286 | 529.6637 | 501.5359 | 579.0717 | -0.48152 | 0.000235 | -0.18372  | 0.233296  | 0.297752 | 0.124352 |
| AT1G50460 | HKL1       | 224.7028 | 199.8356 | 231.7778 | 159.1924 | 174.2289 | 212.3271 | 197.4254 | 238.4347 | 251.8715 | 350.2305 | 295.3341 | 326.3106 | -0.27926 | 0.138768 | 0.05927   | 0.80873   | 0.553685 | 0.012409 |
| AT1G50470 | AT1G50470  | 0        | 0        | 0        | 0        | 0        | 0        | 0        | 0        | 0        | 0        | 0        | 0        | #N/A     | #N/A     | #N/A      | #N/A      | #N/A     | #N/A     |
| AT1G50480 | THFS       | 2143.594 | 1864.537 | 1852.935 | 1300.759 | 1271.937 | 1401.558 | 1647.879 | 1783.405 | 1630.331 | 1779.939 | 1732.095 | 1691.635 | -0.55889 | 3.29E-08 | -0.21152  | 0.066107  | -0.17143 | 0.319262 |
| AT1G50490 | UBC20      | 185.469  | 146.3082 | 169.9704 | 269.7198 | 245.7754 | 218.3081 | 186.7537 | 156.439  | 187.4392 | 170.7973 | 192.8984 | 203.0377 | 0.536478 | 0.001844 | 0.07157   | 0.768743  | 0.160294 | 0.641169 |
| AT1G50500 | VP553      | 388.7716 | 374.6917 | 346.379  | 346.0167 | 321.9591 | 385.7774 | 393.0721 | 384.0848 | 300.6838 | 352.1496 | 363.1812 | 353.2441 | -0.07748 | 0.677848 | -0.04134  | 0.84609   | -0.0544  | 0.879579 |
| AT1G50510 | AT1G50510  | 120.0793 | 180.2088 | 166.1074 | 256.5225 | 223.9139 | 217.3113 | 223.2152 | 245.9869 | 165.9618 | 216.8551 | 170.2827 | 185.4273 | 0.578405 | 0.005956 | 0.440892  | 0.052539  | 0.300264 | 0.406932 |
| AT1G50520 | CYP705A27  | 15.45575 | 35.68492 | 28.3284  | 28.86909 | 27.16116 | 26.9147  | 24.9005  | 20.49891 | 27.33489 | 19.19071 | 9.312338 | 13.46678 | 0.102357 | 0.827942 | -0.07562  | 0.885885  | -0.7506  | 0.214715 |
| AT1G50530 | AT1G50530  | 0        | 0        | 0        | 0        | 0        | 0        | 0        | 0        | 0        | 0        | 0        | 0        | #N/A     | #N/A     | #N/A      | #N/A      | #N/A     | #N/A     |
| AT1G50550 | CYP705A26P | 2.377808 | 1.784246 | 0        | 0.824831 | 0        | 0        | 1.778607 | 0        | 1.952492 | 1.919071 | 1.330334 | 1.035907 | -0.56591 | 0.398457 | -0.02555  | 0.97589   | 0.038113 | NA       |
| AT1G50560 | CYP705A25  | 1.188904 | 0        | 2.575309 | 3.299325 | 3.312336 | 1.993682 | 5.335821 | 6.47334  | 5.857476 | 2.878607 | 6.65167  | 5.179533 | 0.466094 | 0.515537 | 1.160239  | 0.077031  | 0.936369 | NA       |
| AT1G50570 | AT1G50570  | 690.9077 | 610.2121 | 655.4161 | 707.2927 | 877.7691 | 707.757  | 1020.92  | 813.483  | 790.7593 | 584.3572 | 802.1914 | 565.605  | 0.283577 | 0.135177 | 0.475399  | 0.009489  | 0.053151 | 0.900529 |
| AT1G50575 | AT1G50575  | 131.9683 | 128.4657 | 140.3543 | 110.9398 | 128.5187 | 110.6493 | 125.3918 | 124.0723 | 129.8407 | 150.6471 | 145.0064 | 174.0323 | -0.19397 | 0.334103 | -0.08028  | 0.743158  | 0.24681  | 0.481582 |
| AT1G50580 | UGT79B5    | 0        | 0        | 0        | 0        | 0        | 0        | 0        | 1.07889  | 0        | 0        | 1.330334 | 0        | 0        | NA       | 0.160793  | NA        | 0.184979 | NA       |
| AT1G50590 | AT1G50590  | 20.21137 | 35.68492 | 24.46543 | 16.08421 | 18.54908 | 14.95261 | 41.79726 | 24.81447 | 31.23987 | 27.82653 | 41.24035 | 32.1131  | -0.60099 | 0.113821 | 0.303931  | 0.478661  | 0.324427 | 0.626348 |
| AT1G50600 | SCL5       | 529.0623 | 490.6677 | 444.2407 | 394.2693 | 433.2536 | 473.4994 | 550.4789 | 471.4749 | 449.0732 | 488.4036 | 544.1066 | 466.1579 | -0.17332 | 0.288144 | 0.007584  | 0.678187  | 0.030805 | 0.935116 |
| AT1G50603 | AT1G50603  | 0        | 0        | 0        | 0        | 0        | 0        | 0        | 0        | 0        | 0        | 0        | 0        | #N/A     | #N/A     | #N/A      | #N/A      | #N/A     | #N/A     |
| AT1G50610 | PKR5       | 2.377808 | 1.784246 | 1.287654 | 0.412416 | 0.662467 | 0        | 0        | 0        | 0        | 0        | 0        | 1.035907 | -0.67228 | NA       | -0.92107  | NA        | -0.66749 | NA       |
| AT1G50620 | AT1G50620  | 17.5694  | 148.0924 | 186.7099 | 119.6005 | 119.2441 | 136.5672 | 139.6206 | 131.6246 | 76.14719 | 206.3002 | 183.5861 | 156.4219 | -0.54929 | 0.022405 | -0.65097  | 0.008306  | -0.02232 | 0.973085 |
| AT1G50630 | AT1G50630  | 97.49012 | 89.2123  | 84.98519 | 44.5088  | 36.4357  | 40.87047 | 60.47264 | 58.26006 | 59.55101 | 112.2657 | 121.0604 | 94.26749 | -1.10989 | 3E-09    | -0.58851  | 0.012791  | 0.257196 | 0.50728  |
| AT1G50640 | ERF3       | 309.115  | 265.8527 | 267.8321 | 335.7063 | 388.2058 | 347.8974 | 394.8507 | 312.8781 | 493.9805 | 285.9416 | 365.8418 | 283.8384 | 0.3351   | 0.099198 | 0.497931  | 0.012758  | 0.140253 | 0.721302 |
| AT1G50650 | AT1G50650  | 1.188904 | 0        | 0        | 0        | 0        | 0        | 0        | 0        | 0        | 0        | 1.330334 | 0        | -0.22006 | NA       | -0.20393  | NA        | 0.001199 | NA       |
| AT1G50659 | AT1G50659  | 0        | 0        | 0        | 0        | 0        | 0        | 0        | 0        | 0        | 0        | 0        | 0        | #N/A     | #N/A     | #N/A      | #N/A      | #N/A     | #N/A     |
| AT1G50660 | AT1G50660  | 759.7096 | 665.5238 | 670.8679 | 508.5084 | 462.4022 | 593.1203 | 461.5485 | 582.6006 | 352.4248 | 692.7847 | 667.8277 | 601.8617 | -0.41635 | 0.028049 | -0.57483  | 0.002244  | -0.03932 | 0.817029 |
| AT1G50670 | AT1G50670  | 380.4493 | 383.6129 | 493.1716 | 463.9675 | 573.0342 | 444.591  | 463.3271 | 416.4515 | 591.6051 | 475.9297 | 589.3379 | 557.3177 | 0.220463 | 0.262607 | 0.230773  | 0.316383  | 0.35631  | 0.217892 |
| AT1G50680 | AT1G50680  | 1.188904 | 0        | 0        | 0        | 0        | 0        | 0        | 1.07889  | 0        | 0        | 0        | 0        | -0.2127  | NA       | -0.02202  | NA        | -0.1938  | NA       |
| AT1G50690 | AT1G50690  | 0        | 0        | 0        | 0        | 0        | 0.996841 | 0        | 0        | 0        | 0        | 0        | 0        | 0.15625  | NA       | 0         | NA        | 0        | NA       |
| AT1G50691 | AT1G50691  | 0        | 0        | 0        | 0        | 0        | 0        | 0        | 0        | 0        | 0        | 0        | 0        | #N/A     | #N/A     | #N/A      | #N/A      | #N/A     | #N/A     |
| AT1G50700 | CPK33      | 74.90095 | 64.23286 | 45.0679  | 59.80026 | 70.22153 | 74.76306 | 74.70149 | 69.04896 | 60.52725 | 53.734   | 34.58868 | 51.79533 | 0.134521 | 0.676303 | 0.143721  | 0.677429  | -0.35812 | 0.457541 |
| AT1G50710 | AT1G50710  | 131.9683 | 164.1506 | 175.121  | 223.9417 | 214.6394 | 214.3204 | 202.7612 | 207.1469 | 160.1043 | 167.9187 | 152.9884 | 198.8941 | 0.466675 | 0.01216  | 0.272402  | 0.200827  | 0.146734 | 0.697022 |
| AT1G50720 | AT1G50720  | 0        | 0        | 0        | 0        | 0        | 0        | 0        | 0        | 0        | 0        | 0        | 0        | #N/A     | #N/A     | #N/A      | #N/A      | #N/A     | #N/A     |
| AT1G50730 | AT1G50730  | 307.9261 | 376.4759 | 303.8864 | 316.3227 | 314.672  | 376.8058 | 472.2201 | 432.6349 | 260.6577 | 345.4328 | 344.5565 | 372.9264 | 0.028078 | 0.923269 | 0.235115  | 0.348178  | 0.105951 | 0.821978 |
| AT1G50732 | AT1G50732  | 130.7794 | 183.7773 | 166.1074 | 128.6737 | 129.1811 | 85.72831 | 144.0672 | 91.70564 | 172.7955 | 277.3058 | 400.4305 | 339.7773 | -0.44664 | 0.101442 | -0.21504  | 0.498978  | 1.041856 | 0.000377 |
| AT1G50735 | SADHU8-1   | 0        | 1.784246 | 0        | 0        | 0        | 0        | 0        | 0        | 0        | 0        | 0        | 0        | -0.2184  | NA       | -0.20558  | NA        | -0.19918 | NA       |
| AT1G50740 | FAX5       | 76.08985 | 96.34929 | 63.09506 | 288.6909 | 266.3118 | 263.166  | 187.643  | 186.648  | 230.3941 | 72.92471 | 102.4357 | 74.58527 | 1.768714 | 2.29E-20 | 1.768715  | 1.69E-11  | 0.083438 | 0.874312 |
| AT1G50750 | AT1G50750  | 8.322328 | 7.136984 | 6.438272 | 14.43455 | 8.612075 | 23.92418 | 22.23259 | 19.42002 | 22.45366 | 5.757214 | 11.97301 | 5.179533 | 0.842396 | 0.095973 | 1.271301  | 0.010291  | -0.0084  | NA       |
| AT1G50760 | AT1G50760  | 0        | 0        | 0.824831 | 0        | 0        | 0.889303 | 1.07889  | 0        | 0.889303 | 1.07889  | 0        | 1.330334 | 0.150119 | NA       | 0.321758  | NA        | 0.194127 | NA       |
| AT1G50770 | AT1G50770  | 1.188904 | 3.568492 | 3.862963 | 1.649662 | 0.662467 | 0.996841 | 0.889303 | 0        | 0        | 2.878607 | 2.660668 | 2.071813 | -0.61262 | 0.390094 | -1.03988  | 0.12556   | -0.05288 | NA       |
| AT1G50780 | AT1G50780  | 0        | 0        | 1.287654 | 1.649662 | 1.987402 | 0.996841 | 2.66791  | 0        | 3.904984 | 0.995936 | 0        | 0        | 0.491389 | 0.472998 | 0.701778  | 0.298125  | -0.08796 | NA       |
| AT1G50790 | AT1G50790  | 34.47821 | 17.84246 | 27.04074 | 16.90904 | 15.89921 | 14.95261 | 12.45025 | 16.18335 | 14.64369 | 22.69332 | 27.93701 | 34.18492 | -0.68301 | 0.074219 | -0.81733  | 0.04595   | 0.049051 | 0.960514 |
| AT1G50800 | AT1G50800  | 0        | 0        | 0        | 0        | 0        | 0        | 0.889303 | 0        | 0        | 0        | 0        | 0        | 0.160764 | NA       | 0         | NA        | 0        | NA       |
| AT1G50810 | AT1G50810  | 32.10041 | 35.68492 | 30.9037  | 15.25938 | 13.91181 | 16.94629 | 10.67164 | 21.5778  | 15.61994 | 23.98839 | 23.94601 | 29.00538 | -1.00705 | 0.003998 | -0.95771  | 0.011113  | -0.319   | 0.630253 |
| AT1G50820 | AT1G50820  | 2.377808 | 0        | 0        | 0        | 0        | 0        | 1.778607 | 0        | 0.976246 | 3.838143 | 1.330334 | 1.035907 | -0.58706 | 0.344957 | 0.039407  | 0.960849  | 0.488181 | NA       |
| AT1G50830 | AT1G50830  | 10.70014 | 3.568492 | 1.287654 | 4.536571 | 6.624673 | 4.984204 | 1.778607 | 3.23667  | 4.88123  | 0        | 3.991002 | 6.215439 | 0.026084 | 0.975421 | -0.42132  | 0.584832  | -0.40244 | NA       |
| AT1G50840 | POLIA      | 517.1732 | 490.6677 | 433.9395 | 251.5735 | 266.9743 | 297.0586 | 381.5112 | 406.7415 | 326.0662 | 404.924  | 399.1002 | 438.1885 | -0.81742 | 3.01E-09 |           |           |          |          |

|           |           |          |          |          |          |          |          |          |          |          |          |          |          |           |          |          |          |           |          |    |
|-----------|-----------|----------|----------|----------|----------|----------|----------|----------|----------|----------|----------|----------|----------|-----------|----------|----------|----------|-----------|----------|----|
| AT1G51320 | FBX11     | 0        | 0        | 0        | 0.412416 | 0.662467 | 0        | 0        | 0        | 0        | 0        | 0        | 0        | 0         | 0.196313 | NA       | 0        | NA        | 0        | NA |
| AT1G51330 | AT1G51330 | 0        | 0        | 0        | 0.824831 | 0.662467 | 0        | 0        | 0        | 0        | 0        | 0        | 0        | 0         | 0.256538 | NA       | 0        | NA        | 0        | NA |
| AT1G51340 | MATE      | 92.73451 | 105.2705 | 119.7519 | 100.6294 | 102.6824 | 105.6651 | 112.0522 | 122.9935 | 95.67211 | 118.9824 | 97.11438 | 90.12387 | -0.04067  | 0.882306 | 0.056127 | 0.847412 | -0.04532  | 0.933182 |    |
| AT1G51350 | AT1G51350 | 212.8138 | 174.8561 | 180.2716 | 182.2877 | 182.841  | 182.4219 | 269.459  | 224.4091 | 165.9618 | 156.4043 | 105.0964 | 163.6732 | -0.05499  | 0.847177 | 0.207468 | 0.431138 | -0.39908  | 0.255187 |    |
| AT1G51355 | AT1G51355 | 5.94452  | 5.352738 | 16.73951 | 8.248311 | 7.949607 | 8.971567 | 10.67164 | 8.786214 | 6.163121 | 17.29434 | 9.323159 |          | -0.15793  | 0.809439 | -0.24383 | 0.722681 | 0.47334   | NA       |    |
| AT1G51360 | ATDABB1   | 93.92341 | 89.2123  | 103.0123 | 84.13278 | 96.05775 | 90.71251 | 117.3881 | 89.54786 | 138.6269 | 118.9824 | 146.3367 | 71.47755 | -0.08203  | 0.809299 | 0.259222 | 0.411063 | 0.212939  | 0.681704 |    |
| AT1G51370 | AT1G51370 | 54.68958 | 82.07532 | 72.10864 | 57.32576 | 64.92179 | 83.73463 | 80.92662 | 94.94231 | 63.45599 | 50.85539 | 51.88302 | 61.11849 | -0.02476  | 0.945917 | 0.201057 | 0.535389 | -0.31611  | 0.5164   |    |
| AT1G51380 | RH34      | 16.64466 | 17.84246 | 21.89012 | 24.33252 | 23.84882 | 14.95261 | 13.33955 | 20.49891 | 7.809968 | 33.58375 | 18.62468 | 31.83490 | -0.169816 | 0.737519 | -0.39248 | 0.44223  | 0.549413  | 0.425722 |    |
| AT1G51390 | NIFU5     | 116.5126 | 98.13353 | 142.9296 | 174.4518 | 163.6294 | 151.5198 | 156.5174 | 128.3879 | 195.2492 | 86.35821 | 99.77505 | 142.9551 | 0.432481  | 0.082181 | 0.402599 | 0.128401 | -0.12255  | 0.820434 |    |
| AT1G51400 | AT1G51400 | 323.3819 | 260.4999 | 316.763  | 184.3498 | 183.5034 | 90.71251 | 144.9565 | 114.3623 | 274.3251 | 271.5486 | 352.5385 | 540.7432 | -0.85242  | 0.042503 | -0.66418 | 0.141974 | 0.328303  | 0.679803 |    |
| AT1G51402 | AT1G51402 | 3.566712 | 8.92123  | 3.862963 | 2.474493 | 2.649869 | 0        | 1.778607 | 1.07889  | 0        | 4.797678 | 10.64267 | 9.323159 | -0.90303  | 0.167502 | -1.22685 | 0.06482  | 0.502459  | NA       |    |
| AT1G51405 | AT1G51405 | 10.70014 | 16.05821 | 36.05432 | 23.9201  | 19.87402 | 28.90838 | 22.23259 | 36.68226 | 41.97858 | 20.15025 | 38.57969 | 32.1131  | 0.159206  | 0.76154  | 0.586698 | 0.208618 | 0.44201   | 0.561211 |    |
| AT1G51410 | AT1G51410 | 0        | 0        | 0        | 0        | 0.996841 | 0        | 0        | 0.976246 | 0.959536 | 0        | 0        | 0        | 0.133527  | NA       | 0.150897 | NA       | 0.155289  | NA       |    |
| AT1G51420 | SP1       | 0        | 1.784246 | 0        | 0.824831 | 0.662467 | 0        | 0.889303 | 2.15778  | 0.976246 | 3.838143 | 3.991002 | 1.035907 | -0.07612  | 0.926218 | 0.362321 | 0.633398 | 0.932652  | NA       |    |
| AT1G51430 | AT1G51430 | 250.8587 | 256.9314 | 267.8321 | 191.7732 | 213.9769 | 174.4471 | 201.8719 | 156.439  | 169.8668 | 277.3056 | 393.7789 | 330.4542 | -0.40634  | 0.027632 | -0.53877 | 0.004039 | 0.356672  | 0.188754 |    |
| AT1G51440 | AT1G51440 | 135.535  | 82.07532 | 124.9025 | 39.17948 | 45.71024 | 28.90838 | 32.90423 | 17.26224 | 36.1211  | 156.4043 | 176.9344 | 128.4524 | -1.50284  | 1.02E-08 | -1.86649 | 1.57E-11 | 0.399783  | 0.358583 |    |
| AT1G51450 | TRO       | 74.90095 | 73.15409 | 59.2321  | 56.50093 | 57.63465 | 61.80413 | 64.91915 | 80.91675 | 64.43224 | 71.96517 | 71.83803 | 61.11849 | -0.23284  | 0.377147 | 0.018667 | 0.956455 | -0.01462  | 0.983695 |    |
| AT1G51460 | ABCJ13    | 70.14533 | 78.50663 | 88.84815 | 112.177  | 107.3197 | 120.6137 | 68.47637 | 78.75897 | 46.85981 | 73.88424 | 61.19536 | 81.83662 | 0.500602  | 0.035098 | -0.28182 | 0.326479 | -0.11657  | 0.833449 |    |
| AT1G51470 | TG65      | 0        | 0        | 0        | 0        | 0        | 0        | 0.889303 | 0        | 0        | 0        | 0        | 0        | 0.137906  | NA       | 0.137906 | NA       | 0.155338  | NA       |    |
| AT1G51480 | AT1G51480 | 5.94452  | 5.352738 | 2.575309 | 1.649662 | 3.974804 | 2.990522 | 4.446517 | 3.23667  | 3.904984 | 6.716749 | 6.65167  | 2.071813 | -0.48482  | 0.486622 | -0.1558  | 0.852209 | 0.110929  | NA       |    |
| AT1G51490 | TG66      | 0        | 0        | 0        | 0        | 0        | 0        | 0.889303 | 0        | 0        | 0        | 0        | 0        | 0         | NA       | 0.160764 | NA       | 0         | NA       |    |
| AT1G51500 | ABCJ12    | 1905.813 | 2274.914 | 2097.589 | 1290.861 | 1339.509 | 1526.163 | 1485.137 | 1466.211 | 1031.892 | 2086.03  | 2417.217 | 2053.167 | -0.58494  | 0.00268  | -0.64412 | 6.45E-05 | 0.061762  | 0.870405 |    |
| AT1G51510 | Y14       | 359.049  | 301.5376 | 320.6259 | 414.8901 | 471.6767 | 370.8248 | 397.5187 | 393.7948 | 597.4625 | 316.6468 | 375.1542 | 419.5421 | 0.347175  | 0.101354 | 0.485268 | 0.020948 | 0.171073  | 0.661496 |    |
| AT1G51520 | AT1G51520 | 36.85602 | 44.60615 | 30.9037  | 49.48987 | 39.74804 | 44.85784 | 61.36194 | 56.10228 | 35.14486 | 30.70514 | 38.57969 | 39.36445 | 0.260273  | 0.456814 | 0.431295 | 0.214198 | -0.03734  | 0.965527 |    |
| AT1G51530 | AT1G51530 | 1.188904 | 0        | 2.575309 | 0.824831 | 0.662467 | 0.889303 | 1.07889  | 0.976246 | 0.959536 | 2.660668 | 4.143626 |          | -1.94862  | 0.855509 | -0.17425 | 0.837096 | 0.446456  | NA       |    |
| AT1G51538 | AT1G51538 | 7.133424 | 1.784246 | 2.575309 | 4.124156 | 3.974804 | 4.984204 | 3.552124 | 2.15778  | 1.952492 | 5.757214 | 3.991002 | 7.251346 | 0.067897  | 0.933854 | -0.39584 | 0.60484  | 0.357098  | NA       |    |
| AT1G51540 | AT1G51540 | 134.3461 | 149.8767 | 127.4778 | 148.0572 | 126.5312 | 143.5451 | 136.9527 | 140.2557 | 109.3396 | 172.7164 | 131.7031 | 100.5242 | 0.029333  | 0.912123 | -0.08311 | 0.758125 | 0.08919   | 0.845503 |    |
| AT1G51550 | AT1G51550 | 110.5681 | 123.113  | 110.7383 | 108.4653 | 94.07035 | 131.583  | 95.15547 | 116.5201 | 104.4583 | 94.03449 | 89.13238 | 98.41112 | -0.0488   | 0.853652 | -0.11789 | 0.658434 | -0.27384  | 0.454015 |    |
| AT1G51560 | AT1G51560 | 364.9935 | 358.6335 | 310.3247 | 280.855  | 322.6216 | 282.1005 | 345.9391 | 327.9825 | 359.2585 | 321.4444 | 381.8058 | 352.2082 | -0.21921  | 0.15446  | 0.000996 | 0.996207 | 0.027179  | 0.943038 |    |
| AT1G51570 | AT1G51570 | 1171.07  | 920.671  | 932.2617 | 594.2908 | 497.5129 | 629.0065 | 627.8483 | 735.8029 | 512.5291 | 656.3224 | 611.9536 | 794.5403 | -0.79824  | 4.71E-06 | -0.67587 | 0.000168 | -0.54037  | 0.021612 |    |
| AT1G51580 | AT1G51580 | 197.3581 | 187.3458 | 166.1074 | 98.56732 | 86.78321 | 112.643  | 94.26617 | 115.4412 | 103.4821 | 188.069  | 200.8804 | 154.3501 | -0.87447  | 1.53E-06 | -0.79766 | 2.81E-05 | -0.02204  | 0.96566  |    |
| AT1G51590 | MNS1      | 269.8812 | 223.0308 | 261.3938 | 328.6952 | 260.3496 | 323.9733 | 282.7953 | 279.4325 | 245.0377 | 225.4909 | 156.9794 | 250.6894 | 0.264436  | 0.204323 | 0.090678 | 0.724643 | -0.24357  | 0.481893 |    |
| AT1G51600 | GATA28    | 104.6235 | 135.6027 | 122.3272 | 153.831  | 121.2315 | 128.5925 | 114.7201 | 126.2301 | 140.5794 | 118.0229 | 127.7121 | 100.4829 | 0.170316  | 0.464991 | 0.080458 | 0.77236  | -0.05911  | 0.905938 |    |
| AT1G51610 | MTPC4     | 218.7583 | 264.0684 | 266.5444 | 297.3516 | 368.3318 | 367.8342 | 462.4378 | 448.8182 | 380.7359 | 231.2481 | 207.5321 | 303.5262 | 0.452156  | 0.016748 | 0.07718  | 2.11E-05 | -0.00671  | 0.990348 |    |
| AT1G51620 | AT1G51620 | 4.755616 | 3.568492 | 3.862963 | 55.26369 | 57.63465 | 42.86415 | 28.45771 | 24.81447 | 36.1211  | 5.757214 | 2.660668 | 2.071813 | 0.305883  | 3.17E-13 | 2.27686  | 2.55E-07 | -0.17568  | 0.887443 |    |
| AT1G51630 | AT1G51630 | 450.5946 | 440.7088 | 475.1445 | 363.7505 | 355.7449 | 339.9227 | 371.7289 | 308.5625 | 339.7336 | 410.6812 | 385.7969 | 447.5116 | -0.36161  | 0.005963 | -0.41595 | 0.00208  | -0.13307  | 0.591092 |    |
| AT1G51640 | ATEX070G2 | 4.755616 | 8.92123  | 7.725926 | 10.31039 | 13.24935 | 9.774276 | 8.893035 | 24.81447 | 9.76246  | 3.838143 | 6.65167  | 8.827525 | 0.464853  | 0.436371 | 0.681321 | 0.158663 | -0.13263  | NA       |    |
| AT1G51645 | AT1G51645 | 0        | 0        | 0        | 0        | 0        | 0        | 0        | 0        | 0        | 0.959536 | 0        | 0        | 0         | NA       | 0        | NA       | 0.332992  | NA       |    |
| AT1G51650 | AT1G51650 | 601.5854 | 531.7053 | 654.1284 | 842.1526 | 1057.96  | 636.9813 | 650.9701 | 463.9227 | 1126.588 | 626.5768 | 631.9086 | 655.7288 | 0.48068   | 0.091534 | 0.309864 | 0.328559 | 0.092972  | 0.882721 |    |
| AT1G51660 | MKK4      | 112.2682 | 114.1917 | 136.4914 | 211.1568 | 208.6772 | 234.2576 | 259.6766 | 312.8781 | 267.4914 | 92.11542 | 79.82004 | 132.596  | -0.784934 | 4.58E-05 | 1.139838 | 1.39E-09 | -0.27611  | 0.454232 |    |
| AT1G51670 | AT1G51670 | 5.94452  | 5.352738 | 9.01358  | 5.361402 | 6.624673 | 7.974726 | 5.358211 | 5.39445  | 6.833722 | 7.676285 | 7.982004 | 8.287252 | -0.06684  | 0.925714 | -0.17422 | 0.813807 | -0.173105 | NA       |    |
| AT1G51680 | 4CL1      | 940.423  | 797.558  | 802.2087 | 635.12   | 720.1019 | 630.0034 | 653.6381 | 663.5173 | 657.0136 | 819.4434 | 864.7171 | 800.7557 | -0.35449  | 0.003012 | -0.36292 | 0.003194 | -0.03489  | 0.903861 |    |
| AT1G51690 | PPZAB1    | 845.3107 | 949.2189 | 808.6469 | 770.3923 | 751.2379 | 897.1567 | 871.5174 | 824.2719 | 610.1537 | 877.9751 | 909.9484 | 811.1148 | -0.10445  | 0.585632 | -0.17008 | 0.371502 | -0.00099  | 0.998089 |    |
| AT1G51700 | DOF1.7    | 190.2246 | 205.1883 | 206.0247 | 346.8415 | 347.7953 | 356.869  | 364.6114 | 309.6414 | 397.3321 | 242.7625 | 264.7365 | 202.1008 | 0.793221  | 2.46E-07 | 0.822211 | 1.32E-07 | -0.23119  | 0.417306 |    |
| AT1G51710 | UBP6      | 601.5854 | 658.3868 | 700.484  | 712.6541 | 671.0793 | 773.5484 | 803.9033 | 868.5064 | 765.8259 | 657.2819 | 629.248  | 657.8006 | 0.135384  | 0.355317 | 0.275992 | 0.047122 | -0.01029  | 0.978296 |    |
| AT1G51720 | AT1G51720 | 349.5378 | 342.5752 | 320.6259 | 363.3381 | 333.221  | 345.9038 | 401.9652 | 414.2937 | 364.1398 | 345.4328 | 357.8598 | 371.8904 | 0.043741  | 0.973719 | 0.218546 | 0.132074 | 0.085331  | 0.757175 |    |
| AT1G51730 | AT1G51730 | 321.0041 | 365.7704 | 374.7074 | 514.2822 | 480.2888 | 465.5246 | 387.7363 | 380.8481 | 462.7406 | 315.6872 | 341.8958 | 343.921  | 0.459966  | 0.000837 | 0.214232 | 0.181755 | -0.08149  | 0.791931 |    |
| AT1G51740 | SPY81     | 82.0347  | 103.4863 | 103.0123 | 148.4696 | 151.705  | 161.882  | 113.8308 | 148.8868 | 138.6269 | 117.0633 | 103.766  | 112.9138 | 0.666036  | 0.000642 | 0.467536 | 0.025755 | 0.21627   | 0.563333 |    |
| AT1G51745 | AT1G51745 | 175.9578 | 167.7191 | 118.4642 | 100.217  | 105.9948 | 111.6462 | 124.5025 | 135.9401 | 123.9822 | 149.6867 | 158.3097 | 145.0269 | -0.53082  | 0.005345 | -0.25707 | 0.243973 | -0.02635  | 0.959789 |    |
| AT1G51750 | AT1G51750 | 1.188904 | 0        | 0        | 0.824831 | 0        | 0        | 0.889303 | 1.07889  | 0        | 0        | 0        | 0        | -0.05422  | NA       | 0.118304 | NA       | -0.22925  | NA       |    |
| AT1G51760 | ILA       | 252.0476 | 253.3629 | 276.8457 | 726.2638 | 710.8274 | 833.3589 | 1201.449 | 1215.909 | 1393.103 | 2        |          |          |           |          |          |          |           |          |    |

|           |           |          |          |          |          |          |          |          |          |          |          |          |          |          |          |          |          |          |          |
|-----------|-----------|----------|----------|----------|----------|----------|----------|----------|----------|----------|----------|----------|----------|----------|----------|----------|----------|----------|----------|
| AT1G52200 | PCR8      | 64.20081 | 85.64381 | 101.7247 | 429.737  | 508.7749 | 446.5847 | 408.1903 | 368.9804 | 442.2394 | 44.13864 | 66.5167  | 62.15439 | 2.402533 | 1.16E-38 | 2.222031 | 1.15E-32 | -0.52659 | 0.117989 |
| AT1G52210 | AT1G52210 | 0        | 0        | 0        | 0        | 0        | 0        | 0        | 0        | 0        | 0        | 0        | 0        | #N/A     | #N/A     | #N/A     | #N/A     | #N/A     | #N/A     |
| AT1G52211 | AT1G52211 | 0        | 0        | 0        | 0        | 0        | 0        | 0.889303 | 0        | 0        | 0        | 0        | 0        | 0        | NA       | 0.160764 | NA       | 0        | NA       |
| AT1G52220 | CURT1C    | 3590.49  | 3941.399 | 4090.878 | 2288.906 | 2710.154 | 2042.527 | 2414.459 | 2104.914 | 3275.305 | 5897.306 | 7243.668 | 4837.683 | -0.70376 | 0.000304 | -0.56118 | 0.005781 | 0.613115 | 0.015211 |
| AT1G52230 | PSAHE     | 5781.64  | 7297.566 | 7268.809 | 4727.52  | 4519.352 | 3768.058 | 3745.754 | 3161.148 | 4348.2   | 8368.11  | 9780.615 | 8948.161 | -0.63308 | 0.25E-05 | -0.89399 | 1.75E-05 | 0.406466 | 0.068149 |
| AT1G52240 | ATOPGEF11 | 140.2907 | 142.7397 | 109.4506 | 104.7536 | 129.8436 | 87.72199 | 70.25498 | 52.86561 | 70.28971 | 159.2829 | 160.9704 | 132.596  | -0.26264 | 0.52E-05 | -0.97401 | 4.55E-05 | 0.023679 | 0.621716 |
| AT1G52260 | PDIL1-5   | 84.41218 | 105.2705 | 117.1765 | 106.4032 | 119.9066 | 106.662  | 112.0522 | 116.5201 | 116.1733 | 126.6587 | 117.0694 | 124.3088 | 0.11994  | 0.607396 | 0.168395 | 0.487098 | 0.263967 | 0.441239 |
| AT1G52270 | AT1G52270 | 14.26685 | 12.48972 | 14.1642  | 8.660727 | 10.59948 | 6.977885 | 14.02557 | 10.73871 | 13.4335  | 19.95501 | 16.5745  |          | -0.54883 | 0.256609 | -0.15876 | 0.793251 | 0.233431 | NA       |
| AT1G52280 | RABG3D    | 292.4704 | 289.0479 | 347.6667 | 362.5133 | 395.493  | 368.8311 | 284.5771 | 289.1425 | 426.6195 | 351.19   | 404.4215 | 392.6086 | 0.270011 | 0.168795 | 0.102023 | 0.668838 | 0.295196 | 0.318972 |
| AT1G52290 | PERK15    | 349.5378 | 376.4759 | 378.5704 | 404.8722 | 399.4678 | 491.4425 | 160.0746 | 159.6757 | 107.3871 | 297.456  | 276.7095 | 245.5098 | 0.264769 | 0.147101 | -1.33886 | 2.51E-15 | -0.42026 | 0.090185 |
| AT1G52300 | RPL37B    | 876.2222 | 904.6127 | 947.7136 | 1351.898 | 1226.889 | 987.8692 | 647.4129 | 775.7219 | 1651.808 | 853.9867 | 772.924  | 1260.698 | 0.364863 | 0.257714 | 0.162324 | 0.667658 | 0.077367 | 0.914481 |
| AT1G52310 | AT1G52310 | 322.193  | 371.1232 | 329.6395 | 472.6282 | 451.8027 | 472.5025 | 393.9614 | 426.1615 | 268.4676 | 321.4444 | 329.9228 | 334.5978 | 0.444424 | 0.01142  | 0.090515 | 0.694403 | -0.0489  | 0.909915 |
| AT1G52315 | AT1G52315 | 15.45575 | 33.90067 | 33.47901 | 75.05963 | 83.47088 | 72.76938 | 75.5908  | 65.81229 | 65.40848 | 17.27164 | 11.97301 | 29.00538 | 1.420029 | 1.74E-06 | 1.262124 | 4.36E-05 | -0.40857 | 0.516773 |
| AT1G52320 | AT1G52320 | 255.6143 | 324.7328 | 242.079  | 214.4561 | 196.0903 | 245.2228 | 279.2413 | 311.7992 | 254.8002 | 244.6816 | 287.3521 | 226.8635 | -0.31707 | 0.087916 | 0.047295 | 0.848492 | -0.10919 | 0.77103  |
| AT1G52325 | AT1G52325 | 0        | 0        | 0        | 0        | 0        | 0        | 0        | 0        | 0        | 0        | 0        | 0        | #N/A     | #N/A     | #N/A     | #N/A     | #N/A     | #N/A     |
| AT1G52330 | AT1G52330 | 1.188904 | 3.568492 | 1.287654 | 0.412416 | 0        | 0        | 0.889303 | 0        | 0        | 1.919071 | 0        | 1.035907 | -0.88377 | 0.141966 | -0.71986 | 0.254246 | -0.31893 | NA       |
| AT1G52340 | ABA2      | 229.4585 | 281.9109 | 251.0926 | 203.7333 | 188.1407 | 162.485  | 102.2699 | 111.1257 | 140.5794 | 280.1844 | 305.9768 | 235.1508 | -0.43525 | 0.02015  | -1.07474 | 4.22E-09 | 0.10828  | 0.781311 |
| AT1G52342 | AT1G52342 | 82.03437 | 87.42806 | 90.1358  | 146.8199 | 129.1811 | 105.6651 | 154.7388 | 107.889  | 223.5603 | 199.5834 | 333.9138 | 111.8779 | 0.511928 | 0.15937  | 0.831598 | 0.018502 | 1.204369 | 0.003176 |
| AT1G52343 | AT1G52343 | 0        | 0        | 1.287654 | 0.412416 | 1.987402 | 1.993682 | 0.889303 | 2.15778  | 0.972862 | 0        | 1.330334 | 0        | 0.449748 | 0.504601 | 0.400985 | 0.569149 | -0.05849 | NA       |
| AT1G52347 | AT1G52347 | 47.55616 | 62.44861 | 34.76667 | 59.80026 | 94.73282 | 72.76938 | 72.03358 | 59.33895 | 126.8882 | 58.53167 | 77.15937 | 75.62118 | 0.611355 | 0.071518 | 0.794474 | 0.019512 | 0.512934 | 0.3382   |
| AT1G52350 | AT1G52350 | 0        | 0        | 0        | 0        | 0        | 0        | 0        | 0        | 0        | 0        | 0        | 0        | #N/A     | #N/A     | #N/A     | #N/A     | #N/A     | #N/A     |
| AT1G52360 | AT1G52360 | 1157.992 | 1074.116 | 994.0692 | 786.0641 | 783.6988 | 868.2483 | 824.3843 | 1017.393 | 812.2367 | 935.5472 | 886.0024 | 883.6283 | -0.40189 | 0.001915 | -0.28002 | 0.045249 | -0.25119 | 0.212567 |
| AT1G52370 | AT1G52370 | 154.5575 | 151.6609 | 149.3679 | 177.7511 | 187.4782 | 172.4535 | 157.4067 | 162.9124 | 201.1067 | 149.6876 | 133.0334 | 157.4578 | 0.235815 | 0.207358 | 0.190034 | 0.361279 | -0.04439 | 0.920734 |
| AT1G52380 | NUP50A    | 452.9724 | 458.5512 | 442.9531 | 463.9675 | 483.6011 | 481.4741 | 501.5672 | 486.5794 | 536.9353 | 436.5887 | 526.8123 | 434.4048 | 0.075951 | 0.621584 | 0.170409 | 0.245883 | 0.040622 | 0.894522 |
| AT1G52390 | AT1G52390 | 0        | 0        | 0        | 0        | 0.662467 | 0        | 0        | 0        | 0.972246 | 0        | 1.330334 | 2.071813 | 0.078632 | NA       | 0.154802 | NA       | 0.521344 | NA       |
| AT1G52400 | BGLU1B    | 4196.831 | 3770.112 | 4349.696 | 3347.99  | 3044.7   | 3820.891 | 7738.719 | 8266.455 | 6686.309 | 6319.502 | 5144.401 | 4732.221 | -0.26685 | 0.100008 | 0.867803 | 1.98E-09 | 0.388799 | 0.06548  |
| AT1G52410 | TSA1      | 936.8563 | 560.2533 | 758.4284 | 697.8072 | 829.409  | 893.1693 | 2049.845 | 2107.072 | 2257.081 | 1210.934 | 1254.505 | 944.7468 | 0.092758 | 0.699993 | 1.467737 | 1.38E-16 | 0.576974 | 0.019897 |
| AT1G52415 | AT1G52415 | 0        | 0        | 1.287654 | 0        | 0        | 0        | 0        | 0        | 0        | 0        | 0        | 0        | -0.2184  | NA       | -0.20558 | NA       | -0.19918 | NA       |
| AT1G52420 | AT1G52420 | 662.2195 | 601.2909 | 533.0889 | 616.1489 | 586.2835 | 625.0192 | 635.852  | 650.5706 | 550.6207 | 517.1897 | 498.8752 | 539.7073 | 0.023222 | 0.895625 | 0.030858 | 0.868041 | -0.205   | 0.345352 |
| AT1G52430 | AT1G52430 | 8.322328 | 5.352733 | 11.58889 | 13.1973  | 11.26194 | 16.94629 | 13.39955 | 15.10446 | 5.874746 | 7.676285 | 5.321336 | 8.287252 | 0.55021  | 0.30359  | 0.323789 | 0.60554  | -0.20713 | NA       |
| AT1G52440 | AT1G52440 | 0        | 0        | 0        | 0        | 0        | 0        | 0.889303 | 0        | 0        | 0        | 0        | 0        | 0        | NA       | 0.160764 | 0        | 0        | NA       |
| AT1G52450 | AT1G52450 | 24.96698 | 16.05821 | 32.19136 | 25.15735 | 21.19895 | 21.9305  | 38.24005 | 28.05114 | 18.54867 | 18.23118 | 19.95501 | 10.35907 | -0.10367 | 0.834406 | 0.176549 | 0.728446 | -0.55488 | 0.417642 |
| AT1G52460 | AT1G52460 | 0        | 0        | 0        | 0        | 0        | 0        | 0        | 0        | 0        | 0        | 0        | 0        | #N/A     | #N/A     | #N/A     | #N/A     | #N/A     | #N/A     |
| AT1G52470 | AT1G52470 | 0        | 0        | 0        | 0        | 0.662467 | 0        | 0        | 0        | 0        | 0        | 0        | 0        | 0.128567 | NA       | 0        | NA       | 0        | NA       |
| AT1G52490 | AT1G52490 | 0        | 0        | 0        | 0        | 0        | 0        | 1.778607 | 0        | 0        | 0        | 0        | 0        | 0        | NA       | 0.248756 | NA       | 0        | NA       |
| AT1G52500 | FGP1      | 114.1348 | 98.13353 | 113.3136 | 103.5163 | 115.2693 | 108.6556 | 87.15174 | 79.83786 | 104.4583 | 103.6298 | 94.45371 | 111.8779 | -0.00251 | 0.992905 | -0.26159 | 0.265766 | -0.07245 | 0.879283 |
| AT1G52510 | AT1G52510 | 1010.568 | 1143.702 | 1068.753 | 376.9478 | 355.7449 | 451.5689 | 633.1841 | 634.3873 | 637.4886 | 1242.599 | 1223.907 | 1144.677 | -1.43542 | 1.15E-36 | -0.7492  | 1.27E-10 | 0.164545 | 0.430293 |
| AT1G52520 | FRS6      | 80.84547 | 73.15409 | 106.8753 | 81.65828 | 87.44568 | 109.6525 | 87.15174 | 108.9679 | 73.21845 | 72.92471 | 91.79304 | 80.80071 | 0.068797 | 0.825697 | 0.031804 | 0.927543 | -0.09962 | 0.816223 |
| AT1G52530 | AT1G52530 | 19.02246 | 10.70548 | 25.75309 | 13.1973  | 19.87402 | 11.96209 | 12.45025 | 15.10446 | 17.57243 | 19.19071 | 15.96401 | 14.28308 | -0.28849 | 0.551802 | -0.29273 | 0.518182 | -0.21927 | 0.861267 |
| AT1G52540 | AT1G52540 | 135.535  | 164.1506 | 140.3547 | 167.0283 | 201.3901 | 189.3997 | 142.8868 | 149.9657 | 205.0117 | 146.809  | 158.3097 | 147.0987 | 0.337714 | 0.098069 | 0.179367 | 0.455015 | 0.403953 | 0.931292 |
| AT1G52550 | AT1G52550 | 30.9115  | 32.11643 | 39.13238 | 33.81808 | 39.74804 | 29.90522 | 43.57587 | 23.73558 | 42.95482 | 34.54328 | 53.21336 | 36.25673 | 0.009377 | 0.983352 | 0.097877 | 0.830375 | 0.230138 | 0.730364 |
| AT1G52560 | HSP26.5   | 2.377808 | 1.784246 | 1.287654 | 5.361402 | 1.987402 | 2.990522 | 4.446517 | 2.15778  | 2.928738 | 1.919071 | 2.660668 | 2.071813 | 0.537752 | 0.45303  | 0.417624 | 0.594758 | 0.103016 | NA       |
| AT1G52565 | AT1G52565 | 26.15589 | 23.1952  | 16.73951 | 33.81808 | 39.74804 | 28.90838 | 39.12935 | 18.34113 | 36.1211  | 30.70514 | 31.92802 | 34.18492 | 0.583127 | 0.115856 | 0.463339 | 0.26162  | 0.495735 | 0.419797 |
| AT1G52570 | PLDALPHA2 | 16.5589  | 19.62671 | 37.34198 | 40.00431 | 31.13596 | 40.87047 | 55.13682 | 42.07671 | 35.14486 | 38.38143 | 29.93701 | 29.00538 | 0.37136  | 0.307559 | 0.620975 | 0.903453 | 0.165777 | 0.828866 |
| AT1G52580 | ATRB15    | 2.377808 | 1.784246 | 1.287654 | 2.886909 | 3.132336 | 0.996841 | 8.003731 | 5.39445  | 1.954292 | 1.919071 | 0        | 2.071813 | 0.205679 | 0.7983   | 0.862803 | 0.222392 | -0.17397 | NA       |
| AT1G52590 | AT1G52590 | 123.646  | 160.5821 | 125.4222 | 165.1832 | 349.7827 | 203.3555 | 478.4453 | 336.6137 | 541.8165 | 245.6411 | 327.2622 | 251.7253 | 0.770012 | 0.002105 | 1.468882 | 5.76E-10 | 0.774219 | 0.016973 |
| AT1G52600 | AT1G52600 | 148.613  | 198.0513 | 186.7099 | 556.3486 | 496.8505 | 443.5941 | 337.9353 | 313.957  | 433.4532 | 212.0574 | 207.5321 | 228.9353 | 1.467865 | 5.46E-18 | 1.009026 | 1.18E-08 | 0.282549 | 0.372832 |
| AT1G52610 | AT1G52610 | 1.188904 | 0        | 0        | 0        | 0        | 0        | 0        | 0        | 0.976246 | 0        | 0        | 0        | -0.21061 | NA       | -0.03092 | NA       | -0.19245 | NA       |
| AT1G52615 | AT1G52615 | 2.377808 | 0        | 1.287654 | 0        | 0.662467 | 0        | 0.889303 | 1.07889  | 0        | 3.838143 | 1.330334 | 1.035907 | -0.63475 | 0.328049 | -0.3024  | 0.684082 | 0.320026 | NA       |
| AT1G52618 | AT1G52618 | 10.70014 | 12.48972 | 7.725926 | 25.98218 | 25.83622 | 23.92418 | 8.893035 | 21.5778  | 49.78855 | 21.10978 | 14.63367 | 14.50269 | 1.05372  | 0.032149 | 1.114468 | 0.028276 | 0.554476 | 0.53238  |
| AT1G52620 | AT1G52620 | 52.31177 | 51.74313 | 38.62963 | 40.82914 | 35.77323 | 44.85784 | 64.6284  | 49.6289  | 23.4299  | 38.38143 | 39.91002 | 40.40035 | -0.21911 | 0.53242  | -0.38289 | 0.282609 | -0.24461 | 0.686718 |
| AT1G52630 | AT1G52630 | 135.535  | 115.976  | 164.8198 | 130.3233 | 117.9192 | 144.5419 | 112.9415 | 114.3623 | 118.1258 | 123.7801 | 148.9974 | 125.3447 | -0.09815 | 0.675957 | -0.27307 | 0.222392 | -0.0795  | 0.860402 |
| AT1G52640 | AT1G52640 | 11.88904 | 17.84246 | 10.30123 | 14.43455 | 13.24935 | 14.95261 | 22.23259 |          |          |          |          |          |          |          |          |          |          |          |

|           |            |           |           |           |          |          |          |          |          |          |          |          |          |           |           |           |           |           |          |
|-----------|------------|-----------|-----------|-----------|----------|----------|----------|----------|----------|----------|----------|----------|----------|-----------|-----------|-----------|-----------|-----------|----------|
| AT1G53050 | AT1G53050  | 410.1719  | 326.517   | 346.379   | 244.5624 | 175.5538 | 301.0459 | 282.7985 | 295.6158 | 175.7243 | 284.9821 | 266.0668 | 301.4488 | -0.57265  | 0.015141  | -0.50603  | 0.041743  | -0.33429  | 0.393436 |
| AT1G53060 | AT1G53060  | 10.70014  | 8.92123   | 20.60247  | 12.37247 | 12.58688 | 17.94313 | 15.11836 | 19.42002 | 20.50117 | 23.02886 | 27.93701 | 15.5386  | 0.014814  | 0.979871  | 0.360939  | 0.48878   | 0.596145  | 0.404721 |
| AT1G53070 | AT1G53070  | 60.6341   | 37.46917  | 55.36914  | 60.62509 | 52.33491 | 46.85152 | 47.13308 | 39.91893 | 45.88356 | 78.68192 | 78.4897  | 48.6871  | 0.047852  | 0.898915  | -0.21517  | 0.550345  | 0.376083  | 0.439841 |
| AT1G53080 | AT1G53080  | 0         | 3.568492  | 1.287654  | 0        | 0.662467 | 0.996841 | 3.557214 | 1.07889  | 0        | 1.919071 | 1.330334 | 3.10772  | -0.50866  | 0.468155  | 0.050444  | 0.95327   | 0.242206  | NA       |
| AT1G53090 | SPA4       | 297.226   | 272.9896  | 287.1469  | 201.6712 | 161.642  | 216.3144 | 197.4254 | 184.4902 | 131.7932 | 257.1555 | 296.6645 | 289.0179 | -0.55719  | 0.002507  | -0.72724  | 0.000107  | -0.02767  | 0.956388 |
| AT1G53100 | AT1G53100  | 11.88904  | 10.70548  | 12.87654  | 15.25938 | 13.24935 | 18.93997 | 45.35448 | 50.70783 | 34.16861 | 6.716749 | 15.96401 | 12.43088 | 0.315906  | 0.515391  | -0.178373 | 0.1441-05 | -0.06378  | 0.957274 |
| AT1G53110 | PP14       | 135.535   | 139.1712  | 147.3679  | 181.4629 | 208.6772 | 176.4408 | 220.5473 | 208.2258 | 180.6055 | 31.4564  | 119.7301 | 131.5601 | 0.411082  | 0.019208  | 0.053252  | 0.009399  | -0.14174  | 0.696012 |
| AT1G53120 | AT1G53120  | 158.1242  | 208.7568  | 179.6963  | 213.6313 | 148.3927 | 193.3871 | 208.9863 | 175.8591 | 157.1756 | 176.5546 | 203.5411 | 229.9712 | 0.003846  | 0.890689  | 0.002291  | 0.009326  | 0.166125  | 0.686826 |
| AT1G53130 | GRI        | 0         | 0         | 0         | 0        | 0        | 0        | 0        | 0        | 0        | 0.995936 | 0        | 0        | 0         | NA        | 0         | NA        | 0.171512  | NA       |
| AT1G53140 | DRP5A      | 66.57862  | 60.66437  | 61.80741  | 65.57408 | 70.22153 | 80.7441  | 60.47264 | 80.91675 | 41.97858 | 63.32935 | 63.85603 | 59.04667 | 0.173045  | 0.572225  | -0.05193  | 0.890168  | -0.02548  | 0.972905 |
| AT1G53160 | SPL4       | 180.7134  | 174.8561  | 184.1346  | 180.2256 | 180.1911 | 119.6209 | 169.857  | 126.2301 | 205.9879 | 168.8783 | 191.5681 | 202.0018 | -0.15305  | 0.559846  | -0.09951  | 0.737207  | -0.055396 | 0.920201 |
| AT1G53163 | AT1G53163  | 4.755616  | 0         | 2.575309  | 2.474493 | 0.662467 | 1.993682 | 1.778607 | 1.07889  | 0        | 4.797678 | 1.330334 | 5.179533 | -0.29564  | 0.705745  | -0.59835  | 0.425362  | 0.334977  | NA       |
| AT1G53165 | MAP4K ALPH | 224.7028  | 189.1301  | 193.1482  | 175.2766 | 206.0273 | 194.384  | 201.8719 | 248.1447 | 175.7243 | 168.8783 | 234.1388 | 188.535  | -0.08213  | 0.73527   | 0.036418  | 0.894642  | -0.0474   | 0.922046 |
| AT1G53170 | ERF8       | 38.04493  | 44.60615  | 33.47901  | 42.06639 | 49.68505 | 42.86415 | 50.6903  | 56.10228 | 75.17094 | 34.54328 | 23.94601 | 29.00538 | 0.212547  | 0.533284  | 0.626919  | 0.041824  | -0.35286  | 0.53053  |
| AT1G53180 | AT1G53180  | 38.04493  | 24.97944  | 27.04074  | 18.97112 | 17.22415 | 20.93366 | 21.34328 | 20.49891 | 18.54867 | 30.70514 | 23.94601 | 31.0772  | -0.63318  | 0.072987  | -0.54534  | 0.16332   | -0.07153  | 0.93422  |
| AT1G53190 | AT1G53190  | 168.8244  | 173.0719  | 139.0667  | 124.9617 | 120.569  | 127.5956 | 143.1779 | 125.1512 | 148.3894 | 142.0113 | 176.9344 | 148.1346 | -0.35567  | 0.055432  | -0.19556  | 0.365491  | -0.04399  | 0.922598 |
| AT1G53200 | AT1G53200  | 98.67903  | 105.2705  | 106.8753  | 111.7646 | 129.1811 | 120.6177 | 119.1667 | 145.6501 | 127.8882 | 87.31774 | 75.82904 | 82.87252 | 0.210971  | 0.325411  | 0.328332  | 0.127861  | -0.31991  | 0.339925 |
| AT1G53210 | AT1G53210  | 2513.3423 | 2398.0227 | 2303.6114 | 1537.898 | 1568.06  | 1826.212 | 1995.597 | 2273.221 | 2101.858 | 2147.441 | 2100.597 | 1868.775 | -0.54584  | 1.58E-06  | -0.17838  | 0.182288  | -0.23631  | 0.189424 |
| AT1G53220 | AT1G53220  | 0         | 0         | 0         | 0        | 0        | 0        | 0        | 0        | 0        | 0        | 0        | 0        | 0         | NA        | 0         | NA        | 0.160764  | NA       |
| AT1G53230 | TCP3       | 48.74506  | 51.74313  | 46.35556  | 82.48311 | 104.6698 | 88.71883 | 84.48383 | 69.04896 | 148.3894 | 32.62421 | 51.88302 | 35.22082 | 0.854517  | 0.005184  | 0.979607  | 0.001521  | -0.28532  | 0.645681 |
| AT1G53233 | AT1G53233  | 2.377808  | 3.568492  | 2.575309  | 7.42348  | 3.974804 | 6.977885 | 5.477224 | 6.47334  | 4.88123  | 2.838143 | 3.991002 | 4.143626 | 0.75588   | 0.231182  | 0.685226  | 0.316324  | 0.289892  | NA       |
| AT1G53240 | mMDH1      | 2528.799  | 1993.003  | 2058.959  | 1285.912 | 1481.277 | 1412.523 | 1266.368 | 1387.452 | 1430.2   | 3.148363 | 1886.414 | 1843.914 | -0.64917  | 4.59E-07  | -0.68158  | 1.37E-07  | -0.16279  | 0.496205 |
| AT1G53250 | AT1G53250  | 181.9023  | 137.3869  | 160.9568  | 134.0351 | 126.5312 | 116.6304 | 158.296  | 127.309  | 174.748  | 160.2424 | 247.4421 | 223.7558 | -0.34097  | 0.134176  | -0.06508  | 0.827088  | 0.369626  | 0.272328 |
| AT1G53260 | AT1G53260  | 2.377808  | 0         | 1.287654  | 0.412416 | 1.324935 | 0        | 2.66791  | 1.07889  | 0.976246 | 2.878607 | 5.321336 | 5.179533 | -0.46242  | 0.528403  | 0.09585   | 0.912962  | 0.932603  | NA       |
| AT1G53265 | AT1G53265  | 0         | 0         | 0         | 0        | 0.662467 | 0        | 0        | 0        | 0        | 0        | 0        | 0        | 0.128567  | NA        | 0         | NA        | 0         | NA       |
| AT1G53270 | ABC10      | 8.323228  | 7.136984  | 0         | 14.84696 | 8.612075 | 13.95577 | 12.45025 | 14.02557 | 11.71495 | 5.757214 | 5.321336 | 3.10772  | 0.997539  | 0.067935  | 1.00403   | 0.080929  | -0.09155  | NA       |
| AT1G53280 | DJ18       | 330.5153  | 312.2431  | 372.1321  | 531.1913 | 492.8757 | 520.3509 | 393.9614 | 483.3427 | 493.0042 | 419.3171 | 367.1722 | 355.3159 | 0.594253  | 0.312E-05 | 0.421765  | 0.005796  | -0.162254 | 0.547995 |
| AT1G53282 | AT1G53282  | 0         | 0         | 0         | 0        | 0        | 0        | 0        | 0        | 0        | 0        | 0        | 0        | #N/A      | #N/A      | #N/A      | #N/A      | #N/A      | #N/A     |
| AT1G53285 | AT1G53285  | 0         | 0         | 0         | 0        | 0        | 0        | 0        | 0        | 0        | 0        | 0        | 0        | #N/A      | #N/A      | #N/A      | #N/A      | #N/A      | #N/A     |
| AT1G53290 | B3GAL114   | 190.2246  | 169.5034  | 167.3951  | 127.024  | 159.6546 | 126.5988 | 143.1779 | 142.4135 | 157.1756 | 190.9476 | 179.5951 | 168.8528 | -0.3473   | 0.055709  | -0.24967  | 0.219378  | 0.030163  | 0.949258 |
| AT1G53300 | TTL1       | 408.983   | 374.6917  | 315.4753  | 197.5471 | 172.2415 | 245.2228 | 248.1157 | 265.4069 | 119.1002 | 387.6524 | 340.5655 | 307.6642 | -0.80464  | 0.001607  | -0.76178  | 0.003775  | -0.08109  | 0.894009 |
| AT1G53310 | PPC1       | 1457.596  | 1234.698  | 1212.97   | 1258.692 | 1185.816 | 1447.413 | 1163.209 | 1360.48  | 904.0038 | 1061.246 | 1154.73  | 1042.122 | -0.00665  | 0.977079  | -0.18603  | 0.344632  | -0.25797  | 0.343797 |
| AT1G53320 | TULP7      | 423.2498  | 380.0444  | 403.0358  | 461.9054 | 501.4877 | 542.2814 | 618.0659 | 520.025  | 516.4341 | 413.5599 | 508.1876 | 413.3267 | 0.308601  | 0.043704  | 0.447696  | 0.003027  | 0.137399  | 0.629487 |
| AT1G53325 | AT1G53325  | 0         | 0         | 0         | 0        | 0        | 0        | 0        | 0        | 0        | 0        | 0        | 0        | #N/A      | #N/A      | #N/A      | #N/A      | #N/A      | #N/A     |
| AT1G53330 | AT1G53330  | 15.45575  | 23.1952   | 14.1642   | 11.54764 | 17.88662 | 20.93366 | 27.56841 | 25.89336 | 18.54867 | 18.23118 | 11.97301 | 10.35907 | -0.07661  | 0.889124  | 0.429534  | 0.375549  | -0.28894  | 0.743017 |
| AT1G53340 | AT1G53340  | 7.133424  | 1.784246  | 1.287654  | 19.38353 | 16.56168 | 31.8989  | 14.22886 | 12.94668 | 15.61994 | 5.757214 | 3.991002 | 3.10772  | 0.2017954 | 4.68E-05  | 1.440041  | 0.00747   | 0.113438  | NA       |
| AT1G53345 | AT1G53345  | 33.28931  | 23.1952   | 30.9037   | 27.63184 | 27.82367 | 37.87995 | 26.6791  | 17.26224 | 25.63822 | 25.90746 | 19.95501 | 4.40035  | 0.051439  | 0.912514  | -0.31292  | 0.477538  | -0.01994  | 0.984933 |
| AT1G53350 | RPP8L2     | 175.9578  | 158.7979  | 146.7926  | 146.4075 | 109.9696 | 190.3966 | 139.6206 | 194.2002 | 154.2469 | 142.9708 | 155.6491 | 149.1705 | -0.11648  | 0.67123   | 0.014371  | 0.964264  | -0.10428  | 0.838515 |
| AT1G53360 | AT1G53360  | 0         | 0         | 0         | 0        | 0        | 0        | 0.889303 | 0        | 0        | 0.995936 | 0        | 2.071813 | 0         | NA        | 0.154578  | NA        | 0.500732  | NA       |
| AT1G53366 | AT1G53366  | 0         | 0         | 0         | 0        | 0        | 0        | 0        | 0        | 0        | 0        | 0        | 0        | #N/A      | #N/A      | #N/A      | #N/A      | #N/A      | #N/A     |
| AT1G53370 | AT1G53370  | 0         | 0         | 0         | 0        | 0        | 0        | 0.889303 | 0        | 0        | 0        | 0        | 0        | 0         | NA        | 0.160764  | NA        | 0         | NA       |
| AT1G53380 | AT1G53380  | 243.7253  | 244.4417  | 267.8321  | 218.1678 | 232.526  | 230.2702 | 225.8831 | 203.9102 | 234.299  | 234.1267 | 247.4421 | 234.1149 | -0.1533   | 0.337416  | -0.18413  | 0.274841  | -0.08134  | 0.794731 |
| AT1G53390 | ABC24      | 426.8165  | 438.9245  | 368.2691  | 372.4113 | 339.1832 | 488.452  | 410.5299 | 502.7627 | 289.9451 | 338.7161 | 328.5925 | 306.6283 | -0.04185  | 0.882343  | -0.02241  | 0.941887  | -0.33     | 0.340957 |
| AT1G53400 | AT1G53400  | 322.193   | 408.5923  | 350.242   | 421.4887 | 469.6893 | 405.7142 | 421.8582 | 335.5348 | 543.769  | 406.8431 | 432.3585 | 421.6184 | 0.262059  | 0.190965  | -0.254911 | 0.2929477 | 0.220795  | 0.507006 |
| AT1G53410 | AT1G53410  | 5.94452   | 3.568492  | 7.72526   | 70.11065 | 7.949607 | 2.990522 | 7.114428 | 3.23667  | 4.88123  | 5.757214 | 2.660668 | 6.215439 | 0.067054  | 0.930896  | -0.13789  | 0.863360  | -0.1659   | NA       |
| AT1G53420 | AT1G53420  | 0         | 0         | 0         | 1.237247 | 1.324935 | 0.996841 | 0.889303 | 2.15778  | 0.976246 | 0        | 1.330334 | 1.035907 | 0.633527  | 0.315387  | 0.662139  | 0.304405  | 0.377158  | NA       |
| AT1G53430 | AT1G53430  | 650.3305  | 692.2875  | 593.6087  | 678.836  | 604.1702 | 936.0335 | 1306.387 | 1402.557 | 964.531  | 536.3804 | 529.4729 | 590.4667 | 0.189568  | 0.394633  | 0.902403  | 1.35E-06  | -0.21814  | 0.539974 |
| AT1G53440 | AT1G53440  | 619.419   | 538.8243  | 551.1161  | 440.4598 | 290.8231 | 583.1515 | 610.9515 | 770.3274 | 311.4225 | 476.8892 | 439.0102 | 499.3069 | -0.3606   | 0.252505  | -0.01425  | 0.97237   | -0.25733  | 0.637513 |
| AT1G53450 | AT1G53450  | 175.9578  | 162.3664  | 167.3951  | 152.5938 | 115.9318 | 146.5356 | 294.3595 | 207.1469 | 196.2254 | 215.8955 | 218.1748 | 170.9246 | -0.27832  | 0.23105   | 0.452057  | 0.043586  | -0.247198 | 0.5164   |
| AT1G53460 | AT1G53460  | 152.1797  | 174.8561  | 166.1074  | 151.3565 | 156.3423 | 128.5925 | 152.0709 | 167.2279 | 211.8454 | 136.2541 | 146.3367 | 138.8115 | -0.15989  | 0.457932  | 0.108943  | 0.651463  | -0.2187   | 0.525695 |
| AT1G53470 | MSL4       | 9.511232  | 17.84266  | 6.438272  | 15.67179 | 15.23675 | 23.92418 | 13.12562 | 26.65699 | 14.64369 | 13.4335  | 13.30334 | 9.323159 | 0.067064  | 0.209676  | 0.291782  | 0.0504395 | 0.114888  | 0.924232 |
| AT1G53480 | MRD1       | 33.28931  | 23.1952   | 30.9037   | 34.23049 | 37.70663 | 29.90522 | 32.01493 | 23.73558 | 47.36097 | 30.70514 | 18.62468 | 27.96948 | 0.190314  | 0.683137  | 0.435018  | 0.327043  |           |          |



|           |           |          |          |          |           |          |          |          |          |          |          |          |          |          |          |           |          |          |          |
|-----------|-----------|----------|----------|----------|-----------|----------|----------|----------|----------|----------|----------|----------|----------|----------|----------|-----------|----------|----------|----------|
| AT1G53885 | AT1G53885 | 41.61164 | 49.95889 | 52.79383 | 84.54519  | 99.37009 | 96.69356 | 198.3147 | 143.4924 | 273.3489 | 115.1443 | 114.4087 | 78.7289  | 0.894673 | 0.001318 | 1.987674  | 1.57E-14 | 1.026502 | 0.002892 |
| AT1G53887 | AT1G53887 | 23.77808 | 23.1952  | 24.46543 | 21.85803  | 16.56166 | 14.95261 | 17.78607 | 19.42002 | 21.47741 | 18.23118 | 22.61568 | 25.89766 | -0.35056 | 0.392652 | -0.25981  | 0.576267 | -0.0938  | 0.918783 |
| AT1G53890 | AT1G53890 | 60.6341  | 103.4863 | 95.28642 | 62.06639  | 52.99738 | 65.79136 | 114.7201 | 88.46897 | 109.3396 | 146.809  | 212.8534 | 179.2118 | -0.67066 | 0.011972 | 0.273969  | 0.374096 | 1.0227   | 0.000558 |
| AT1G53900 | AT1G53900 | 149.8019 | 171.2876 | 169.9704 | 120.4253  | 135.8058 | 135.5703 | 108.495  | 101.4157 | 98.60085 | 167.9187 | 179.5951 | 179.2118 | -0.32284 | 0.066803 | -0.65015  | 0.000229 | 0.103068 | 0.774608 |
| AT1G53903 | AT1G53903 | 43.98945 | 49.95889 | 41.20494 | 86.19486  | 76.18374 | 96.69356 | 176.9714 | 131.6246 | 259.6814 | 101.7108 | 114.4087 | 82.87252 | 0.875900 | 0.00199  | 1.969088  | 6.42E-14 | 1.073847 | 0.00481  |
| AT1G53910 | RAFP-12   | 1355.35  | 1325.695 | 1273.49  | 1304.47   | 1510.425 | 1435.451 | 1434.447 | 1459.738 | 1494.633 | 1191.743 | 1363.592 | 1321.693 | 0.14919  | 0.412012 | 0.14919   | 0.412012 | -0.06382 | 0.784009 |
| AT1G53920 | GLIP5     | 47.55616 | 44.60615 | 47.64321 | 114.6515  | 94.73282 | 81.74094 | 42.68657 | 52.86561 | 40.02609 | 34.54328 | 34.58868 | 55.93895 | 1.023491 | 0.000101 | -0.05185  | 0.899271 | -0.14944 | 0.816067 |
| AT1G53930 | AT1G53930 | 0        | 0        | 0        | 0         | 0        | 0        | 0        | 0        | 0        | 0        | 0        | 0        | #N/A     | #N/A     | #N/A      | #N/A     | #N/A     | #N/A     |
| AT1G53935 | AT1G53935 | 0        | 0        | 0        | 0.412416  | 0        | 0        | 0        | 0        | 0.972646 | 0        | 0        | 0        | 0.065752 | NA       | 0.143461  | NA       | 0        | NA       |
| AT1G53940 | GLIP2     | 0        | 0        | 1.287654 | 0.412416  | 0        | 0        | 0        | 1.778607 | 0        | 0        | 0        | 0        | -0.16228 | NA       | 0.084854  | NA       | -0.04083 | NA       |
| AT1G53950 | AT1G53950 | 0        | 0        | 0        | 0         | 0        | 0        | 0        | 1.778607 | 0        | 0        | 0        | 0        | 0        | NA       | 0.248756  | NA       | 0        | NA       |
| AT1G53970 | AT1G53970 | 0        | 0        | 0        | 0         | 0        | 0        | 0        | 0        | 0        | 0        | 0.959536 | 0        | 0        | 0        | 0         | NA       | 0        | 0.171512 |
| AT1G53980 | AT1G53980 | 0        | 0        | 0        | 1.237247  | 1.324935 | 0        | 1.778607 | 1.07889  | 4.88123  | 0        | 0        | 0        | 0.463152 | 0.46647  | 1.09248   | 0.062376 | 0        | NA       |
| AT1G53990 | GLIP3     | 0        | 0        | 0        | 0.824831  | 3.312336 | 0        | 5.35821  | 7.55223  | 9.76246  | 0        | 0        | 0        | 0.618264 | 0.368147 | 2.107145  | 0.00048  | 0        | NA       |
| AT1G54000 | GLL22     | 20.21137 | 7.136984 | 23.17778 | 39.5919   | 34.4483  | 25.91786 | 41.79726 | 51.78672 | 40.02609 | 21.10978 | 14.63367 | 16.5745  | 0.855955 | 0.020641 | 1.216895  | 0.000836 | -0.00328 | 0.997319 |
| AT1G54010 | GLL23     | 76.08985 | 42.8219  | 45.0679  | 282.0923  | 259.6872 | 288.087  | 275.6841 | 210.3835 | 247.9665 | 47.97678 | 55.87403 | 63.1903  | 2.23184  | 1.18E-26 | 2.060002  | 2.42E-22 | -0.00946 | 0.990348 |
| AT1G54020 | AT1G54020 | 45.17835 | 42.8219  | 48.93086 | 81.24587  | 88.77061 | 74.76306 | 163.6318 | 121.9146 | 144.4844 | 78.68192 | 45.23135 | 49.72351 | 0.791985 | 0.002291 | 1.577034  | 9.62E-11 | 0.330175 | 0.498675 |
| AT1G54030 | MVP1      | 400.6608 | 458.5512 | 411.6177 | 586.6764  | 565.7471 | 622.0286 | 570.5721 | 669.9907 | 621.8687 | 369.4212 | 396.4395 | 340.8132 | 0.479974 | 0.000294 | 0.682889  | 1.01E-07 | -0.19421 | 0.490921 |
| AT1G54035 | AT1G54035 | 0        | 0        | 0        | 0         | 0        | 0        | 0.889303 | 0        | 0        | 0.959536 | 0        | 0        | 0        | 0        | 0.13694   | NA       | 0        | 0.147196 |
| AT1G54040 | ESP       | 267.5034 | 342.5752 | 314.1877 | 109.2901  | 78.83361 | 109.6525 | 96.93408 | 127.309  | 151.3181 | 404.924  | 385.7969 | 333.5619 | -1.58398 | 1.34E-16 | -1.26065  | 1.35E-10 | 0.280853 | 0.404134 |
| AT1G54050 | HSP17.4B  | 68.95643 | 39.25341 | 66.95803 | 42.06639  | 58.95959 | 35.88627 | 43.57587 | 51.78672 | 71.26596 | 91.15588 | 95.78405 | 93.23159 | -0.35253 | 0.265608 | -0.09349  | 0.815165 | 0.620398 | 0.133267 |
| AT1G54060 | ASIL1     | 317.4374 | 315.8115 | 334.7901 | 306.8372  | 312.0221 | 304.0364 | 294.3595 | 283.7481 | 390.4984 | 310.8895 | 309.9678 | 321.131  | -0.06833 | 0.724453 | 0.000517  | 0.998157 | -0.03924 | 0.920201 |
| AT1G54070 | AT1G54070 | 0        | 0        | 0        | 0         | 0        | 0        | 0        | 0        | 0.972646 | 0        | 0        | 0        | 0        | 0        | 0         | NA       | 0        | 0        |
| AT1G54080 | UBP1A     | 1337.517 | 1084.822 | 1098.369 | 999.6954  | 1085.121 | 1015.781 | 1037.817 | 1078.89  | 1042.631 | 1231.084 | 1395.52  | 1147.784 | -0.18362 | 0.188391 | -0.15684  | 0.296224 | 0.095896 | 0.71064  |
| AT1G54090 | ATEX070D2 | 362.6157 | 351.4965 | 301.3111 | 284.5667  | 348.4578 | 346.9006 | 412.6368 | 359.2703 | 317.2799 | 285.9416 | 264.7365 | 384.3213 | -0.05344 | 0.827506 | -0.050504 | 0.680414 | -0.11292 | 0.777884 |
| AT1G54095 | AT1G54095 | 0        | 1.784246 | 0        | 0.824831  | 0        | 1.993682 | 0.889303 | 1.07889  | 0.972646 | 0.959536 | 0        | 0        | 0.193502 | NA       | 0.232459  | NA       | -0.06964 | NA       |
| AT1G54100 | ALDH7B4   | 848.8774 | 1056.274 | 923.2482 | 880.0948  | 839.346  | 1140.386 | 1148.98  | 1290.352 | 1030.916 | 1043.975 | 988.4381 | 892.9514 | 0.01501  | 0.947857 | 0.291866  | 0.101077 | 0.049991 | 0.897035 |
| AT1G54110 | AT1G54110 | 73.71204 | 73.15409 | 96.57408 | 122.4874  | 139.1181 | 96.69356 | 138.7313 | 103.5734 | 106.4108 | 112.2657 | 138.3547 | 103.5907 | 0.539991 | 0.023564 | 0.496233  | 0.050882 | 0.507507 | 0.15159  |
| AT1G54115 | CCX4      | 240.1586 | 248.0102 | 238.2161 | 236.7265  | 196.0903 | 274.312  | 224.105  | 280.5114 | 214.7741 | 195.7451 | 166.2917 | 216.5045 | -0.0423  | 0.862179 | -0.01464  | 0.956731 | -0.31487 | 0.300033 |
| AT1G54120 | AT1G54120 | 19.02246 | 8.92123  | 9.01358  | 9.897974  | 8.612075 | 2.990522 | 5.572714 | 8.079968 | 6.716749 | 15.96401 | 11.39497 | 0        | -0.58049 | 0.380808 | -0.8961   | 0.125605 | -0.13442 | NA       |
| AT1G54130 | RSH3      | 1377.94  | 1432.75  | 1250.312 | 734.9246  | 720.7644 | 853.2957 | 955.1119 | 918.1353 | 778.0681 | 1042.056 | 1144.087 | 1091.845 | -0.80768 | 3.57E-11 | -0.60721  | 1.39E-06 | -0.30543 | 0.099471 |
| AT1G54140 | TA9       | 123.646  | 108.839  | 118.4642 | 151.7689  | 168.2667 | 146.5356 | 137.842  | 143.4924 | 158.1519 | 125.6992 | 188.9074 | 124.3088 | 0.395499 | 0.061984 | 0.390006  | 0.186673 | 0.295004 | 0.403554 |
| AT1G54150 | AT1G54150 | 103.4346 | 142.7397 | 115.8889 | 121.8064  | 208.6772 | 191.3934 | 184.0588 | 190.9635 | 183.5342 | 121.861  | 131.7031 | 130.5242 | 0.767915 | 3.57E-06 | 0.629616  | 0.000335 | 0.097729 | 0.806013 |
| AT1G54160 | NFYA5     | 35.66712 | 33.90067 | 32.19136 | 36.70499  | 34.4483  | 41.86731 | 51.5796  | 36.68226 | 41.00233 | 31.66468 | 31.92802 | 31.0772  | 0.128985 | 0.724453 | 0.331719  | 0.344184 | -0.10011 | 0.890915 |
| AT1G54170 | CID3      | 303.1705 | 374.6917 | 289.7222 | 396.7438  | 341.1706 | 383.7837 | 411.7475 | 358.1915 | 219.6553 | 318.5658 | 347.2172 | 277.6229 | 0.211063 | 0.399285 | 0.036072  | 0.908283 | -0.0328  | 0.95645  |
| AT1G54180 | BRXL3     | 57.06739 | 48.17464 | 70.82099 | 57.73818  | 60.94699 | 60.80729 | 56.02612 | 43.1556  | 32.21612 | 42.21957 | 42.57069 | 64.2262  | 0.014589 | 0.969564 | -0.40423  | 0.220164 | -0.23342 | 0.681077 |
| AT1G54200 | AT1G54200 | 80.84547 | 71.36984 | 66.95803 | 41.24156  | 43.06037 | 38.87679 | 39.12935 | 49.62894 | 62.47974 | 64.28889 | 71.83803 | 64.2262  | -0.79584 | 0.001238 | -0.52002  | 0.056527 | -0.13135 | 0.807821 |
| AT1G54210 | ATG12A    | 54.68958 | 85.64381 | 93.99877 | 194.2477  | 243.788  | 161.4882 | 187.643  | 106.8101 | 221.6078 | 96.9131  | 79.82004 | 104.6266 | 1.28866  | 3.18E-06 | 1.081593  | 0.00016  | 0.255405 | 0.654642 |
| AT1G54215 | AT1G54215 | 0        | 1.784246 | 0        | 0.824831  | 0        | 1.07889  | 0.972646 | 0.959536 | 0.959536 | 1.035907 | 0        | 0        | -0.15457 | NA       | 0.073684  | NA       | 0.451956 | NA       |
| AT1G54217 | AT1G54217 | 16.64466 | 17.84246 | 10.30123 | 33.81808  | 27.16116 | 20.93366 | 33.79533 | 19.42002 | 30.26363 | 30.70514 | 21.28534 | 18.64632 | 0.804058 | 0.046628 | 0.80719   | 0.059158 | 0.588392 | 0.3848   |
| AT1G54220 | AT1G54220 | 202.1137 | 139.1712 | 215.0383 | 139.3965  | 155.0173 | 176.4408 | 158.296  | 170.4646 | 200.1304 | 167.9187 | 147.6671 | 189.5709 | -0.25553 | 0.251821 | -0.08367  | 0.761088 | -0.14364 | 0.732207 |
| AT1G54230 | AT1G54230 | 1.188904 | 0        | 0        | 0.412416  | 0.662467 | 0        | 0        | 1.07889  | 0        | 0        | 0        | 0        | -0.00734 | NA       | -0.03759  | NA       | -0.23414 | NA       |
| AT1G54240 | AT1G54240 | 0        | 0        | 0        | 0.662467  | 0        | 0.889303 | 0        | 0.959536 | 0        | 0.959536 | 0        | 0        | 0.100335 | NA       | 0.144523  | NA       | 0.157063 | NA       |
| AT1G54250 | NRPB8A    | 30.9115  | 30.33218 | 38.62963 | 76.29688  | 56.97219 | 44.85784 | 65.80846 | 39.91893 | 84.9334  | 30.70514 | 35.91902 | 43.50807 | 0.784047 | 0.020245 | 0.85915   | 0.013308 | 0.118405 | 0.883453 |
| AT1G54260 | AT1G54260 | 166.4466 | 187.3458 | 160.9568 | 191.3608  | 185.4908 | 171.4566 | 234.7761 | 176.938  | 162.0568 | 179.4332 | 184.9164 | 164.7091 | 0.099334 | 0.660594 | 0.162369  | 0.47577  | 0.042614 | 0.928402 |
| AT1G54270 | TIFA-2    | 1451.652 | 1093.743 | 1157.601 | 1021.553  | 1122.915 | 1113.471 | 1108.961 | 1044.365 | 1029.94  | 1115.94  | 1189.319 | 1021.404 | -0.14235 | 0.379309 | -0.21743  | 0.176306 | -0.15565 | 0.50652  |
| AT1G54280 | ALA6      | 0        | 0        | 0        | 0.412416  | 0.662467 | 0        | 1.778607 | 3.23667  | 0.972646 | 0.959536 | 0        | 1.035907 | 0.140712 | NA       | 0.94833   | NA       | 0.363391 | NA       |
| AT1G54290 | AT1G54290 | 78.46766 | 76.72258 | 72.10864 | 108.0529  | 89.43308 | 86.72515 | 129.8383 | 118.6779 | 162.0568 | 108.4275 | 147.6671 | 94.26749 | 0.318156 | 0.218185 | 0.822347  | 0.000461 | 0.588719 | 0.078722 |
| AT1G54300 | AT1G54300 | 0        | 1.784246 | 0        | 0         | 0        | 0.889303 | 0        | 0.972646 | 0        | 0        | 0        | 0        | -0.31542 | NA       | 0.08696   | NA       | -0.27406 | NA       |
| AT1G54310 | AT1G54310 | 183.0912 | 231.952  | 178.984  | 303.20592 | 101.3575 | 81.74094 | 116.4988 | 127.309  | 134.7219 | 169.8378 | 148.9974 | 139.8474 | -1.06017 | 1.53E-09 | -0.62632  | 0.000819 | -0.35179 | 0.218552 |
| AT1G54320 | AUIS3     | 529.0623 | 599.5067 | 597.4716 | 821.5318  | 819.472  | 743.6432 | 684.7637 | 725.014  | 673.6009 | 499.9181 | 492.2236 | 479.6247 | 0.467983 | 2.39E-05 | 0.271384  | 0.026744 | -0.22495 | 0.220828 |
| AT1G54330 | ANAC02    | 3.566712 | 0        | 6.483272 | 2.474493  | 3.312336 | 0.996841 | 2.66791  | 1.07889  | 2.928738 | 3.88143  | 5.321336 | 2.071813 | -0.34265 | 0.659203 | -0.36079  | 0.652897 | 0.041833 | NA       |
| AT1G54340 | ICDH      | 267.5034 | 246.226  | 267.8321 | 298.5889  | 270.2866 | 315.9985 | 296.1381 | 321.5092 | 270.4201 |          |          |          |          |          |           |          |          |          |

|           |           |          |          |          |          |          |          |          |          |          |          |          |           |          |          |          |          |          |          |
|-----------|-----------|----------|----------|----------|----------|----------|----------|----------|----------|----------|----------|----------|-----------|----------|----------|----------|----------|----------|----------|
| AT1G54850 | ACD22.3   | 92.73451 | 89.2123  | 92.71111 | 136.922  | 173.5664 | 122.6114 | 126.2811 | 100.3368 | 169.8668 | 106.5085 | 111.7481 | 88.05205  | 0.634349 | 0.00798  | 0.508966 | 0.048477 | 0.145084 | 0.781064 |
| AT1G54860 | AT1G54860 | 0        | 0        | 0        | 0        | 0        | 0        | 0        | 0        | 0        | 0.959536 | 0        | 0         | 0        | NA       | 0        | NA       | 0.171512 | NA       |
| AT1G54870 | AT1G54870 | 0        | 0        | 0        | 0        | 0.662467 | 0        | 1.778607 | 1.07889  | 0        | 0        | 0        | 0         | 0.096984 | NA       | 0.46458  | NA       | 0        | NA       |
| AT1G54880 | AT1G54880 | 0        | 0        | 0        | 0        | 0        | 0        | 0        | 0        | 0        | 0        | 0        | 0         | #N/A     | #N/A     | #N/A     | #N/A     | #N/A     | #N/A     |
| AT1G54890 | AT1G54890 | 0        | 0        | 1.287654 | 1.649662 | 1.324935 | 3.987363 | 3.557214 | 4.31556  | 0.976246 | 0        | 0        | 0         | 0.744731 | 0.264387 | 0.949719 | 0.156048 | -0.30249 | NA       |
| AT1G54905 | AT1G54905 | 0        | 0        | 0        | 0        | 0        | 0        | 0        | 0        | 0        | 0        | 0        | 0         | #N/A     | #N/A     | #N/A     | #N/A     | #N/A     | #N/A     |
| AT1G54920 | AT1G54920 | 699.0755 | 640.5443 | 744.2642 | 478.8145 | 406.7549 | 543.2782 | 594.0547 | 667.8329 | 353.4011 | 653.4438 | 643.8816 | 664.0161  | -0.5311  | 0.012916 | -0.35811 | 0.125238 | -0.08565 | 0.860432 |
| AT1G54923 | AT1G54923 | 1.188904 | 0        | 0        | 0        | 0.824831 | 0        | 0.996841 | 0        | 0        | 0        | 0        | 0.1035907 | 0.111991 | NA       | -0.24381 | NA       | -0.03469 | NA       |
| AT1G54926 | AT1G54926 | 0        | 0        | 1.287654 | 0.824831 | 0.662467 | 0.996841 | 1.778607 | 1.07889  | 0        | 0.959536 | 0        | 0         | 0.195399 | NA       | 0.255363 | NA       | -0.07101 | NA       |
| AT1G54930 | AT1G54930 | 8.322328 | 7.136984 | 10.30123 | 5.773818 | 8.612075 | 1.993682 | 2.66791  | 6.47334  | 2.928738 | 8.635821 | 7.982004 | 11.39497  | -0.46066 | 0.45708  | -0.81591 | 0.192558 | 0.100683 | NA       |
| AT1G54940 | GUX4      | 0        | 0        | 0        | 0        | 0        | 0        | 0        | 0        | 0        | 0.959536 | 0        | 1.035907  | 0        | NA       | 0        | NA       | 0.332992 | NA       |
| AT1G54950 | AT1G54950 | 0        | 0        | 0        | 0        | 0        | 0        | 0        | 0        | 0        | 0        | 0        | 0         | #N/A     | #N/A     | #N/A     | #N/A     | #N/A     | #N/A     |
| AT1G54955 | AT1G54955 | 0        | 0        | 0        | 0        | 0        | 0        | 0        | 0        | 0        | 0        | 0        | 0         | #N/A     | #N/A     | #N/A     | #N/A     | #N/A     | #N/A     |
| AT1G54960 | ANP2      | 55.87849 | 28.54794 | 37.34198 | 35.46774 | 28.48609 | 22.92734 | 42.68657 | 24.81447 | 29.28738 | 42.21957 | 39.91002 | 37.29264  | -0.44814 | 0.208467 | -0.32074 | 0.42538  | -0.04913 | 0.956548 |
| AT1G54970 | PRP1      | 1.188904 | 0        | 0        | 0        | 0        | 0        | 0.889303 | 0        | 0        | 0        | 0        | 0         | -0.20902 | NA       | -0.03919 | NA       | -0.19148 | NA       |
| AT1G54980 | AT1G54980 | 0        | 0        | 0        | 0        | 0        | 0        | 0        | 0        | 0        | 0        | 0        | 0         | #N/A     | #N/A     | #N/A     | #N/A     | #N/A     | #N/A     |
| AT1G54985 | AT1G54985 | 0        | 0        | 0        | 0        | 0.662467 | 0        | 0        | 0        | 0        | 0        | 0        | 0         | 0.128567 | NA       | 0        | NA       | 0        | NA       |
| AT1G54990 | AKR4      | 347.16   | 314.0273 | 310.3247 | 344.7794 | 321.9591 | 364.8437 | 362.8358 | 411.0571 | 382.6884 | 263.8723 | 222.1658 | 342.8851  | 0.081552 | 0.699239 | 0.244318 | 0.205238 | -0.22128 | 0.465103 |
| AT1G55000 | AT1G55000 | 594.452  | 613.7806 | 700.484  | 634.2952 | 722.0893 | 639.9718 | 801.2624 | 690.4896 | 681.4197 | 752.2759 | 685.122  | 618.4362  | 0.063241 | 0.719366 | 0.185011 | 0.250307 | 0.105549 | 0.708157 |
| AT1G55010 | PDF1.5    | 0        | 1.784246 | 1.287654 | 2.062078 | 3.312336 | 3.987363 | 0        | 1.952492 | 1.919071 | 0        | 0        | 0         | 0.762872 | 0.252039 | -0.16564 | 0.839311 | -0.13452 | NA       |
| AT1G55020 | LOX1      | 217.5694 | 173.0719 | 166.1074 | 147.6448 | 162.9669 | 175.444  | 146.7351 | 137.019  | 109.3396 | 223.5718 | 215.5141 | 210.289   | -0.20589 | 0.308218 | -0.49548 | 0.010555 | 0.212239 | 0.516773 |
| AT1G55030 | AT1G55030 | 1.188904 | 0        | 0        | 0        | 0        | 0        | 0        | 0        | 0        | 0        | 0        | 0         | -0.2184  | NA       | -0.20558 | NA       | -0.19918 | NA       |
| AT1G55035 | AT1G55035 | 0        | 0        | 0        | 0        | 0        | 0        | 0        | 0        | 0        | 0        | 0        | 1.035907  | 0        | NA       | 0        | NA       | 0.172362 | NA       |
| AT1G55040 | AT1G55040 | 76.08985 | 51.74313 | 42.49259 | 51.55195 | 43.06037 | 69.77885 | 54.24751 | 48.55005 | 56.62227 | 41.26003 | 45.23135 | 48.68761  | -0.07718 | 0.834406 | -0.09884 | 0.803639 | -0.32603 | 0.543028 |
| AT1G55045 | AT1G55045 | 0        | 0        | 0        | 0        | 0        | 0        | 0        | 0        | 0        | 0        | 0        | 0         | #N/A     | #N/A     | #N/A     | #N/A     | #N/A     | #N/A     |
| AT1G55050 | AT1G55050 | 19.02246 | 14.27397 | 10.30123 | 15.67179 | 14.57428 | 19.93682 | 16.00746 | 12.94668 | 10.73871 | 11.51443 | 14.63367 | 12.43088  | 0.156853 | 0.766843 | -0.12012 | 0.841514 | -0.16986 | NA       |
| AT1G55060 | UBQ12     | 0        | 0        | 0        | 0        | 0.662467 | 0        | 0        | 0        | 0        | 0        | 0        | 0         | 0.128567 | NA       | 0        | NA       | 0        | NA       |
| AT1G55070 | AT1G55070 | 0        | 0        | 0        | 0        | 0        | 0        | 0        | 0        | 0        | 0        | 0        | 0         | #N/A     | #N/A     | #N/A     | #N/A     | #N/A     | #N/A     |
| AT1G55080 | MED9      | 105.8125 | 98.13353 | 109.4506 | 174.4518 | 198.7402 | 152.5166 | 239.2226 | 194.2002 | 155.2231 | 126.6587 | 222.1658 | 114.9856  | 0.710361 | 0.006757 | 0.864888 | 0.000981 | 0.523838 | 0.192619 |
| AT1G55090 | W7N2.4    | 422.0609 | 408.5923 | 460.9803 | 285.804  | 243.1255 | 314.0048 | 305.0311 | 400.2682 | 207.9404 | 395.3287 | 296.6645 | 429.9012  | -0.59729 | 0.009099 | -0.48522 | 0.046046 | -0.19445 | 0.656323 |
| AT1G55100 | AT1G55100 | 0        | 0        | 0        | 0.412416 | 1.324935 | 0        | 0.889303 | 0.77889  | 0        | 0        | 0        | 0         | 0.339074 | NA       | 1.07889  | 0        | 0.343169 | NA       |
| AT1G55110 | IDD7      | 225.8917 | 221.2465 | 220.1889 | 389.3203 | 321.9591 | 382.7869 | 476.6667 | 477.9482 | 303.6125 | 201.5025 | 195.5591 | 189.5709  | 0.695424 | 0.00024  | 0.892162 | 1.9E-06  | -0.18142 | 0.633551 |
| AT1G55120 | CWINV3    | 107.0014 | 114.1917 | 130.0531 | 90.73143 | 82.80841 | 103.6714 | 57.80473 | 58.26006 | 44.90732 | 69.08657 | 57.20436 | 74.58527  | -0.33855 | 0.131466 | -1.08711 | 7.53E-07 | -0.77116 | 0.005405 |
| AT1G55130 | TWN6      | 255.6143 | 208.7568 | 207.3123 | 192.5981 | 194.7654 | 226.2829 | 216.99   | 198.5157 | 166.9381 | 214.936  | 156.9794 | 197.8581  | -0.13803 | 0.523779 | -0.20453 | 0.354083 | -0.22943 | 0.490228 |
| AT1G55140 | AT1G55140 | 227.0807 | 267.6369 | 287.1469 | 250.7487 | 258.3622 | 250.207  | 277.4627 | 249.2236 | 290.9213 | 348.3114 | 344.5565 | 352.2082  | -0.03833 | 0.840399 | 0.068478 | 0.726948 | 0.416973 | 0.029417 |
| AT1G55150 | RH20      | 143.8574 | 169.5034 | 149.3679 | 180.2526 | 180.8536 | 190.3966 | 160.0764 | 144.5713 | 134.7219 | 122.8206 | 101.1054 | 126.3806  | 0.254753 | 0.164743 | -0.06313 | 0.795064 | -0.37624 | 0.168465 |
| AT1G55152 | AT1G55152 | 85.60108 | 114.1917 | 73.3963  | 70.7510  | 74.2348  | 92.74542 | 91.70935 | 123.6132 | 124.0723 | 156.1994 | 109.3871 | 114.4087  | 0.407097 | 0.813575 | 0.892162 | 0.019153 | 0.183334 | 0.694266 |
| AT1G55160 | AT1G55160 | 179.5245 | 180.2088 | 207.3123 | 190.9484 | 196.0903 | 158.4977 | 170.7463 | 146.729  | 274.3251 | 157.3638 | 204.8714 | 214.4327  | -0.05077 | 0.871744 | 0.059205 | 0.859351 | 0.019842 | 0.976969 |
| AT1G55170 | FLX13     | 53.50068 | 46.3904  | 47.64321 | 68.46099 | 62.27192 | 59.81045 | 73.81219 | 55.02339 | 67.36097 | 32.62421 | 35.91902 | 58.01077  | 0.353612 | 0.230933 | 0.389823 | 0.211798 | -0.2109  | 0.715123 |
| AT1G55175 | AT1G55175 | 2.377808 | 1.784246 | 3.862963 | 2.474493 | 0.662467 | 0.996841 | 4.446517 | 1.07889  | 0.972646 | 0        | 1.330334 | 0         | -0.40609 | 0.586879 | -0.12508 | 0.887024 | -0.89139 | NA       |
| AT1G55180 | PLDEP510  | 96.30122 | 90.99655 | 86.27284 | 77.70137 | 72.8174  | 78.75042 | 90.70896 | 99.25787 | 81.02842 | 86.35821 | 87.80204 | 96.33931  | -0.24623 | 0.283503 | -0.06312 | 0.956731 | -0.01616 | 0.978871 |
| AT1G55190 | PRA1F2    | 67.76752 | 60.66437 | 55.36914 | 71.76031 | 94.07035 | 62.80097 | 70.25498 | 52.86561 | 102.5058 | 69.08657 | 55.87403 | 45.57989  | 0.300702 | 0.355717 | 0.279715 | 0.427683 | -0.10087 | 0.885047 |
| AT1G55200 | AT1G55200 | 68.95643 | 58.88012 | 57.94445 | 47.01538 | 43.06037 | 51.83572 | 51.5796  | 48.55005 | 37.09735 | 88.27728 | 91.79304 | 80.80071  | -0.38913 | 0.134786 | -0.42314 | 0.133027 | 0.465283 | 0.208475 |
| AT1G55205 | AT1G55205 | 10.70014 | 10.70548 | 11.58889 | 15.25938 | 19.21155 | 10.96525 | 9.782338 | 9.710009 | 13.66744 | 9.593536 | 3.991002 | 5.179533  | 0.426349 | 0.414941 | 0.006384 | 0.992532 | -0.60873 | NA       |
| AT1G55207 | AT1G55207 | 0        | 0        | 1.287654 | 0        | 0.662467 | 0.996841 | 0        | 0        | 0        | 0        | 0        | 0         | 0.065692 | NA       | -0.23746 | NA       | -0.22999 | NA       |
| AT1G55210 | DIR20     | 133.1572 | 114.1917 | 131.3407 | 536.1402 | 503.4751 | 353.8785 | 388.6256 | 383.0059 | 493.9805 | 159.2829 | 156.9794 | 150.2064  | 1.827528 | 1.7E-22  | 1.685206 | 5.92E-19 | 0.281845 | 0.44489  |
| AT1G55220 | AT1G55220 | 0        | 0        | 0        | 0        | 0.996841 | 0        | 0        | 0        | 0        | 0        | 0        | 0         | 0.15625  | NA       | 0        | NA       | 0        | NA       |
| AT1G55221 | AT1G55221 | 0        | 0        | 0        | 0.412416 | 0        | 0        | 0        | 0        | 0        | 0        | 0        | 0         | 0.095918 | NA       | 0        | NA       | 0        | NA       |
| AT1G55230 | AT1G55230 | 0        | 0        | 1.287654 | 0.412416 | 1.987402 | 0.996841 | 2.66791  | 2.15778  | 4.88123  | 0        | 0        | 0         | 0.291415 | 0.690079 | 1.072932 | 0.09545  | -0.30161 | NA       |
| AT1G55240 | AT1G55240 | 0        | 0        | 0        | 2.474493 | 3.974804 | 1.993682 | 0.889303 | 2.15778  | 0.972646 | 0        | 0        | 0         | 1.278331 | 0.032406 | 0.645867 | 0.331182 | 0        | NA       |
| AT1G55250 | HUB2      | 348.3489 | 360.4177 | 309.037  | 350.1408 | 333.221  | 336.9322 | 377.0642 | 417.5304 | 282.1351 | 325.2826 | 279.3701 | 289.0179  | 0.008633 | 0.977208 | 0.080936 | 0.718032 | -0.17962 | 0.567279 |
| AT1G55260 | AT1G55260 | 309.115  | 339.0067 | 403.0358 | 349.7284 | 365.6819 | 358.8627 | 317.4813 | 281.5903 | 341.6861 | 498.9585 | 615.9446 | 487.912   | 0.029701 | 0.890198 | -0.15665 | 0.422074 | 0.595541 | 0.001634 |
| AT1G55265 | AT1G55265 | 84.41218 | 58.88012 | 61.80741 | 77.53413 | 39.72022 | 46.85152 | 50.6903  | 50.70783 | 44.90732 | 87.31774 | 105.0964 | 44.54398  | 0.106027 | 0.801502 | -0.45716 | 0.230945 | 0.178595 | 0.800416 |
| AT1G55270 | AT1G55270 | 205.6804 | 249.7944 | 222.7642 | 179.8132 | 157.6672 | 183.4187 | 183.1965 | 165.0702 | 153.2706 | 203.4126 | 175.6041 | 204.0736  | -0.36793 | 0.028479 | -0.41835 | 0.017137 | -0.20204 | 0.498267 |
| AT1G55280 | AT1G55280 | 82.03437 | 137.3869 | 117.1765 | 85.78244 | 78.83361 | 90.71251 | 121.8346 | 107.889  | 103.4821 | 107.468  | 98.44471 | 109.8061  | -0.37187 | 0.101028 | 0.006962 | 0.981884 | -0.06736 | 0.896269 |
| AT1G55290 | F6'H2     | 1.188904 | 0        | 0        | 0.662467 | 0        | 1.778607 | 0        | 0        | 0.959536 | 0        | 1.035907 | 0         | -0.14147 | NA       | 0.090959 | NA       | 1.12315  | NA       |
| AT1G55300 | TA7       | 70.14533 | 58.88012 | 84.98519 | 89.94918 | 82.14594 | 69.77885 | 64.02985 | 76.60119 | 99.57709 | 83.4796  | 61.19536 | 75.62118  | 0.167573 | 0.573062 |          |          |          |          |

|           |           |          |          |          |          |          |           |          |          |           |          |          |          |           |          |          |          |          |          |
|-----------|-----------|----------|----------|----------|----------|----------|-----------|----------|----------|-----------|----------|----------|----------|-----------|----------|----------|----------|----------|----------|
| AT1G55680 | AT1G55680 | 655.0861 | 676.2292 | 654.1284 | 703.9934 | 689.6284 | 671.8707  | 708.7749 | 786.5108 | 667.7523  | 615.0623 | 615.9446 | 622.5798 | 0.059132  | 0.664853 | 0.122682 | 0.352884 | -0.09721 | 0.65505  |
| AT1G55690 | SFH13     | 260.37   | 231.952  | 306.4617 | 144.3454 | 134.4809 | 186.4092  | 179.6393 | 194.2002 | 122.0307  | 251.3983 | 251.4331 | 272.4434 | -0.77187  | 0.000124 | -0.67312 | 0.001345 | -0.04514 | 0.931292 |
| AT1G55700 | AT1G55700 | 0        | 0        | 0        | 0.412416 | 0        | 0         | 0.889303 | 1.07889  | 0         | 0        | 0        | 0        | 0.058291  | NA       | 0.343513 | NA       | 0.183181 | NA       |
| AT1G55710 | AT1G55710 | 0        | 1.784246 | 0        | 0.412416 | 0        | 0.996841  | 0        | 0        | 0         | 0        | 0        | 0        | -0.01331  | NA       | -0.28675 | NA       | -0.07088 | NA       |
| AT1G55720 | ATXAK6    | 2.377808 | 3.568492 | 0        | 2.886909 | 1.987402 | 4.984204  | 0.889303 | 4.31556  | 2.928738  | 0        | 1.330334 | 2.071813 | 0.416176  | 0.577214 | 0.244944 | 0.772224 | -0.30418 | NA       |
| AT1G55730 | CAX5      | 147.4241 | 148.0924 | 121.0395 | 198.3719 | 224.5764 | 199.3682  | 211.5114 | 193.1213 | 151.3181  | 120.9015 | 119.7301 | 131.5601 | 0.569742  | 0.002251 | 0.420413 | 0.03873  | -0.15404 | 0.695023 |
| AT1G55740 | RF51      | 16.64466 | 10.70548 | 12.87654 | 13.1973  | 10.59948 | 11.96209  | 9.282338 | 7.55223  | 4.88123   | 17.27164 | 7.982004 | 14.50269 | -0.14987  | 0.794869 | -0.7127  | 0.184186 | -0.00392 | NA       |
| AT1G55750 | TFB1-1    | 147.4241 | 155.2294 | 135.2037 | 151.3565 | 162.9669 | 166.4724  | 208.9937 | 172.6224 | 112.2683  | 150.6471 | 119.7301 | 146.0269 | 0.130517  | 0.630227 | 0.170069 | 0.543695 | -0.06226 | 0.911082 |
| AT1G55760 | AT1G55760 | 73.71204 | 64.23286 | 69.53333 | 47.01538 | 37.09817 | 45.85468  | 58.69403 | 45.31338 | 54.66978  | 54.69353 | 45.23135 | 64.2262  | -0.65027  | 0.010195 | -0.37088 | 0.199218 | -0.31966 | 0.480369 |
| AT1G55770 | AT1G55770 | 1.188904 | 3.568492 | 0        | 0.412416 | 0        | 0.1778607 | 0        | 0.928738 | 2.878607  | 0        | 0        | 0        | -0.69063  | 0.292501 | 0.06005  | 0.943691 | 0.326562 | NA       |
| AT1G55790 | AT1G55790 | 0        | 1.784246 | 0        | 21.44561 | 14.57428 | 12.95893  | 26.6791  | 17.26224 | 33.19236  | 0.995936 | 1.330334 | 0        | 2.652585  | 7.71E-07 | 3.201412 | 1.55E-09 | -0.03263 | NA       |
| AT1G55800 | AT1G55800 | 4.755616 | 10.70548 | 5.150617 | 7.42348  | 7.949607 | 5.981045  | 8.003731 | 5.39445  | 2.928738  | 9.595356 | 11.97301 | 5.179533 | 0.090956  | 0.890131 | -0.19661 | 0.794095 | 0.322195 | NA       |
| AT1G55805 | BOLA1     | 183.0912 | 167.7191 | 195.7235 | 204.9705 | 255.0499 | 197.3745  | 205.4291 | 159.6757 | 315.3275  | 242.7625 | 328.5925 | 243.438  | 0.253564  | 0.358198 | 0.301695 | 0.288234 | 0.547148 | 0.123878 |
| AT1G55810 | UK13      | 254.4254 | 289.0479 | 278.1333 | 176.9263 | 162.3045 | 175.444   | 273.9055 | 263.2491 | 216.7266  | 323.3635 | 288.6825 | 263.1202 | -0.65954  | 2.29E-05 | -0.11775 | 0.557307 | 0.094916 | 0.779875 |
| AT1G55820 | AT1G55820 | 54.68958 | 14.03769 | 11.50617 | 59.38784 | 42.39791 | 61.80413  | 65.80846 | 87.39009 | 41.00233  | 15.81492 | 38.57969 | 42.47127 | 0.127766  | 0.742064 | 0.358829 | 0.319462 | -0.14229 | 0.844696 |
| AT1G55830 | AT1G55830 | 116.5126 | 139.1712 | 140.3543 | 131.5606 | 151.0425 | 162.485   | 177.8607 | 133.7824 | 126.912   | 158.3234 | 167.6221 | 140.8833 | 0.159453  | 0.495596 | 0.151823 | 0.547784 | 0.233072 | 0.524771 |
| AT1G55840 | AT1G55840 | 703.8311 | 811.8319 | 830.5371 | 854.1127 | 1004.963 | 1079.579  | 1134.751 | 1034.655 | 906.9325  | 838.6341 | 927.2428 | 800.7557 | 0.318848  | 0.035702 | 0.386951 | 0.011335 | 0.127786 | 0.654738 |
| AT1G55850 | C5LE1     | 278.2035 | 283.6951 | 276.8457 | 473.0407 | 508.7749 | 549.2593  | 939.9938 | 1016.314 | 1072.894  | 169.8378 | 200.8804 | 161.6014 | 0.853263  | 6.34E-11 | 1.832217 | 1.67E-48 | -0.65134 | 0.000188 |
| AT1G55860 | UPL1      | 2061.559 | 1493.414 | 1194.943 | 700.2816 | 583.3327 | 895.163   | 976.5512 | 1255.828 | 616.9875  | 1194.622 | 1120.141 | 1169.538 | -1.0763   | 1.43E-05 | -0.70572 | 0.007403 | -0.42781 | 0.296514 |
| AT1G55870 | PARN      | 129.5905 | 139.1712 | 132.6284 | 112.5895 | 100.0326 | 114.6367  | 107.6057 | 101.4157 | 82.00466  | 94.03449 | 146.3367 | 117.0574 | -0.28424  | 0.207358 | -0.44613 | 0.050975 | -0.17155 | 0.680588 |
| AT1G55880 | AT1G55880 | 109.3792 | 18.91335 | 115.8889 | 132.3854 | 128.5187 | 133.5767  | 120.9453 | 116.5201 | 110.3158  | 111.3061 | 75.82904 | 107.7343 | 0.272702  | 0.195192 | 0.095675 | 0.71823  | -0.12254 | 0.777614 |
| AT1G55890 | AT1G55890 | 260.37   | 253.3629 | 226.6272 | 210.3131 | 210.6646 | 225.286   | 208.097  | 193.1213 | 217.3964  | 216.8551 | 215.5141 | 224.7917 | -0.19477  | 0.291772 | -0.13409 | 0.519652 | -0.16748 | 0.595873 |
| AT1G55900 | TIM50     | 129.5905 | 85.64381 | 132.6284 | 156.3055 | 155.6798 | 154.5103  | 129.8383 | 127.309  | 123.9832  | 130.4968 | 174.2738 | 126.3806 | 0.393763  | 0.059496 | 0.108787 | 0.685831 | 0.2724   | 0.445334 |
| AT1G55910 | ZIP11     | 181.9023 | 187.3458 | 157.0938 | 317.56   | 383.5686 | 297.0586  | 225.8831 | 158.5968 | 206.9642  | 156.4043 | 145.0064 | 132.9356 | 0.908598  | 3.94E-07 | 0.170523 | 0.470529 | -0.26724 | 0.433225 |
| AT1G55915 | AT1G55915 | 24.96698 | 14.03769 | 28.3284  | 39.5919  | 53.65985 | 40.87047  | 27.56841 | 26.97225 | 24.40615  | 22.06932 | 17.29434 | 129.5357 | 0.886367  | 0.000822 | 0.167665 | 0.720004 | -0.04813 | 0.960974 |
| AT1G55920 | SAT1      | 328.1375 | 333.654  | 288.4346 | 271.7819 | 289.4982 | 283.1028  | 276.5734 | 192.0424 | 225.5128  | 370.3808 | 381.8058 | 285.9102 | -0.16622  | 0.413025 | -0.43813 | 0.020032 | 0.125062 | 0.72919  |
| AT1G55928 | AT1G55928 | 0        | 0        | 0        | 0        | 0        | 0         | 0        | 0        | 0         | 0        | 0        | 0        | 0         | NA       | 0        | NA       | 0        | NA       |
| AT1G55930 | CBSDFUCH2 | 184.2801 | 215.8938 | 142.9296 | 135.6847 | 132.4935 | 156.504   | 160.9639 | 199.5946 | 178.653   | 165.0401 | 183.5861 | 204.0736 | -0.34373  | 0.090258 | -0.00259 | 0.992532 | 0.033809 | 0.948017 |
| AT1G55940 | CYP708A1  | 3.566712 | 10.70548 | 20.60247 | 28.86909 | 27.82363 | 28.90838  | 16.89677 | 26.97225 | 11.47741  | 18.23118 | 41.24035 | 18.07432 | 1.094842  | 0.014018 | 0.798866 | 0.139072 | 0.94678  | 0.15612  |
| AT1G55950 | AT1G55950 | 1.188904 | 0        | 1.287654 | 2.474493 | 3.312336 | 0.996841  | 3.557214 | 0        | 6.833722  | 0        | 2.660668 | 1.035907 | 0.492488  | 0.496336 | 0.797619 | 0.258438 | 0.075093 | NA       |
| AT1G55960 | AT1G55960 | 699.0755 | 747.5991 | 687.6074 | 400.0431 | 381.5811 | 380.7932  | 338.8246 | 332.2981 | 240.1565  | 750.3569 | 989.7685 | 773.8222 | -0.85885  | 4.52E-08 | -1.20355 | 1.83E-14 | 0.23136  | 0.403727 |
| AT1G55964 | AT1G55964 | 4.755616 | 3.568492 | 1.287654 | 3.299325 | 5.962205 | 1.993682  | 2.66791  | 1.07889  | 4.88123   | 3.838143 | 0        | 0        | 0.174577  | 0.830654 | -0.07147 | 0.936471 | -0.54923 | NA       |
| AT1G55970 | HAC04     | 210.436  | 178.4246 | 162.2444 | 80.00862 | 62.93439 | 86.7515   | 104.9378 | 125.1512 | 59.5101   | 140.0922 | 184.9164 | 170.9246 | -1.2427   | 5.5E-07  | -0.892   | 0.000447 | -0.15061 | 0.77538  |
| AT1G55980 | AT1G55980 | 87.97889 | 89.91778 | 106.1288 | 78.35896 | 88.29712 | 70.7757   | 92.48756 | 73.36452 | 93.71962  | 105.5489 | 123.7211 | 112.9138 | -0.48705  | 0.029433 | -0.17678 | 0.51626  | 0.201457 | 0.624674 |
| AT1G55990 | AT1G55990 | 1.188904 | 0        | 1.287654 | 2.886909 | 2.649869 | 0         | 2.66791  | 2.15778  | 1.952492  | 9.595356 | 3.991002 | 2.071813 | 0.363341  | 0.631322 | 0.4569   | 0.555223 | 1.192966 | NA       |
| AT1G56000 | AT1G56000 | 190.2246 | 189.1301 | 182.8469 | 158.78   | 157.0047 | 128.5925  | 147.6244 | 158.5968 | 183.5342  | 167.9187 | 216.8444 | 202.0018 | -0.32128  | 0.086688 | -0.19527 | 0.363586 | 0.055438 | 0.896642 |
| AT1G56010 | NAC021    | 160.502  | 217.678  | 173.8333 | 202.496  | 262.9995 | 212.3271  | 209.8756 | 207.1469 | 165.9614  | 132.4159 | 121.0604 | 168.8528 | 0.297981  | 0.170219 | 0.086433 | 0.753495 | -0.36106 | 0.277425 |
| AT1G56020 | AT1G56020 | 16.64466 | 37.46917 | 29.61605 | 27.63184 | 35.11077 | 39.87363  | 18.67537 | 24.81447 | 20.50117  | 29.7456  | 19.95501 | 36.25673 | 0.285394  | 0.487955 | -0.32397 | 0.474807 | 0.082726 | 0.928267 |
| AT1G56030 | PUB57     | 0        | 1.784246 | 0        | 0        | 0        | 0         | 0        | 0        | 0.976246  | 1.919071 | 2.660668 | 1.035907 | -0.41143  | NA       | -0.11164 | NA       | 0.614588 | NA       |
| AT1G56040 | PUB58     | 0        | 0        | 0        | 0.412416 | 0        | 0.996841  | 0        | 0        | 0         | 0.985326 | 0        | 0        | 0.245807  | NA       | 0        | NA       | 0.71544  | NA       |
| AT1G56045 | RPL41E    | 216.3805 | 117.7602 | 157.0938 | 237.139  | 290.8231 | 136.5672  | 149.403  | 102.4945 | 466.6456  | 184.2308 | 266.0668 | 304.5565 | -0.345288 | 0.56431  | 0.434734 | 0.477888 | 0.491408 | 0.597213 |
| AT1G56050 | AT1G56050 | 549.2736 | 520.9998 | 544.6778 | 305.5999 | 261.0121 | 306.0301  | 364.6144 | 358.1915 | 330.9474  | 511.4325 | 489.5629 | 574.9281 | -0.87965  | 1.46E-12 | -0.61005 | 2.56E-06 | -0.03458 | 0.915717 |
| AT1G56060 | AT1G56060 | 2.377808 | 0        | 3.862963 | 2.474493 | 41.73544 | 15.94945  | 37.35075 | 29.13003 | 67.36097  | 3.838143 | 2.660668 | 2.071813 | 2.514429  | 5.37E-07 | 3.1208   | 2.64E-10 | 0.078028 | 0.960136 |
| AT1G56070 | LOS1      | 8494.719 | 6086.063 | 5699.158 | 3583.479 | 3653.507 | 4271.463  | 3986.748 | 4829.111 | 4055.3621 | 4738.187 | 4426.021 | 5084.229 | -0.80276  | 7.37E-07 | -0.64406 | 0.000113 | -0.49992 | 0.026222 |
| AT1G56080 | AT1G56080 | 10.70014 | 8.92123  | 10.30123 | 24.74493 | 15.89921 | 22.92734  | 26.6791  | 32.3667  | 27.33489  | 12.47396 | 17.29434 | 8.287252 | 0.922307  | 0.031029 | 1.314707 | 0.001818 | 0.236306 | 0.806384 |
| AT1G56085 | AT1G56085 | 0        | 0        | 0        | 0        | 0.662467 | 0         | 0        | 0        | 0         | 0        | 0        | 0        | 0.128567  | NA       | 0        | NA       | 0        | NA       |
| AT1G56090 | AT1G56090 | 73.71204 | 76.72258 | 73.3963  | 97.74249 | 82.80841 | 68.78201  | 61.36194 | 73.36452 | 105.4346  | 61.41028 | 50.55269 | 72.51346 | 0.166713  | 0.592907 | 0.09724  | 0.788368 | -0.2554  | 0.616738 |
| AT1G56100 | AT1G56100 | 0        | 0        | 0        | 0.824831 | 0        | 0         | 0        | 0        | 0         | 0        | 0        | 0        | 0.173038  | NA       | 0        | NA       | 0        | NA       |
| AT1G56110 | NOP56     | 1136.592 | 1077.685 | 1085.493 | 1088.777 | 1254.713 | 1112.474  | 933.7687 | 936.4765 | 1230.07   | 944.1831 | 917.9304 | 1065.948 | 0.06533   | 0.718796 | -0.08915 | 0.631457 | -0.16994 | 0.511961 |
| AT1G56120 | AT1G56120 | 136.724  | 117.7602 | 121.0395 | 151.3953 | 427.2914 | 520.3509  | 135.1741 | 149.9657 | 93.71962  | 39.34096 | 41.24035 | 37.29264 | 1.911131  | 1.93E-25 | 0.005448 | 0.985796 | -1.59697 | 8.83E-11 |
| AT1G56130 | AT1G56130 | 16.64466 | 24.97944 | 19.31482 | 22.68286 | 23.18635 | 32.89575  | 30.23632 | 19.42002 | 21.47741  | 14.39303 | 9.312338 | 19.68221 | 0.335968  | 0.440074 |          |          |          |          |



|           |           |           |          |          |          |          |          |          |          |          |          |          |           |          |          |          |          |          |          |    |
|-----------|-----------|-----------|----------|----------|----------|----------|----------|----------|----------|----------|----------|----------|-----------|----------|----------|----------|----------|----------|----------|----|
| AT1G57590 | PAE2      | 28.53369  | 32.11643 | 48.93086 | 15.25938 | 19.87402 | 13.95577 | 27.56841 | 19.42002 | 20.50117 | 74.84378 | 39.91002 | 66.29802  | -1.05418 | 0.002777 | -0.63323 | 0.106144 | 0.689793 | 0.170498 |    |
| AT1G57600 | AT1G57600 | 114.1348  | 142.7397 | 180.2716 | 163.729  | 171.579  | 155.5072 | 186.7573 | 159.6757 | 134.7219 | 157.3638 | 152.9884 | 124.3088  | 0.165731 | 0.499986 | 0.137476 | 0.611151 | -0.0077  | 0.990348 |    |
| AT1G57610 | AT1G57610 | 224.7028  | 242.6575 | 225.3395 | 286.6288 | 341.8331 | 280.1123 | 318.3706 | 267.5647 | 373.9022 | 210.1383 | 238.1298 | 245.5098  | 0.465772 | 0.028452 | 0.465572 | 0.009438 | 0.00293  | 0.995545 |    |
| AT1G57613 | AT1G57613 | 0         | 0        | 0        | 0        | 0        | 0        | 0        | 0        | 0        | 0        | 0        | 0         | #N/A     | #N/A     | #N/A     | #N/A     | #N/A     | #N/A     |    |
| AT1G57620 | CYB       | 15.31371  | 130.25   | 155.8062 | 251.161  | 296.1229 | 227.2797 | 200.0933 | 195.2791 | 259.6814 | 168.8783 | 171.6131 | 170.9246  | 0.775176 | 1.54E-05 | 0.53476  | 0.005786 | 0.184834 | 0.60972  |    |
| AT1G57630 | AT1G57630 | 130.07794 | 30.33218 | 14.1642  | 207.8574 | 209.3397 | 214.3208 | 254.515  | 241.6713 | 403.1896 | 18.23118 | 10.64267 | 11.39497  | 3.262926 | 3.43E-29 | 0.573263 | 1.6E-38  | -0.36982 | 0.5959   |    |
| AT1G57640 | AT1G57640 | 3.566712  | 1.784246 | 2.575309 | 4.536571 | 1.987402 | 9.968408 | 5.335821 | 8.63112  | 5.857476 | 0.995936 | 0        | 1.035907  | 0.609482 | 0.375274 | 0.832457 | 0.229637 | -0.73357 | NA       |    |
| AT1G57650 | AT1G57650 | 2.377808  | 1.784246 | 3.862963 | 6.273184 | 23.84882 | 28.90838 | 45.35448 | 46.39227 | 28.31113 | 1.919071 | 0        | 0         | 2.515222 | 9.06E-08 | 0.304526 | 3.59E-11 | -0.72406 | 0.481893 |    |
| AT1G57660 | RPL21F    | 852.4441  | 847.5169 | 1008.233 | 1098.263 | 936.0663 | 923.0746 | 668.7562 | 780.0374 | 955.7448 | 818.4839 | 670.4883 | 933.3518  | 0.125165 | 0.553602 | -0.16906 | 0.431627 | -0.15669 | 0.645634 |    |
| AT1G57670 | AT1G57670 | 0         | 0        | 1.287654 | 0        | 0        | 0.996841 | 0        | 0        | 0.976246 | 0        | 0        | 0         | -0.06594 | NA       | -0.04653 | NA       | -0.21403 | NA       |    |
| AT1G57680 | AT1G57680 | 1131.837  | 1120.507 | 932.2617 | 701.5189 | 684.3287 | 869.2452 | 735.454  | 1007.683 | 990.8897 | 942.264  | 846.0924 | 787.289   | -0.49064 | 0.003778 | -0.21623 | 0.269118 | -0.29947 | 0.263611 |    |
| AT1G57690 | AT1G57690 | 1.188904  | 0        | 0        | 0        | 0        | 0        | 0        | 0        | 0        | 0        | 0        | 0         | -0.2184  | NA       | -0.20558 | NA       | -0.19918 | NA       |    |
| AT1G57700 | AT1G57700 | 99.86793  | 85.64381 | 65.67037 | 66.39891 | 59.62205 | 82.73778 | 69.36567 | 88.46897 | 71.26596 | 79.64146 | 89.13238 | 76.65708  | -0.27359 | 0.300567 | -0.13325 | 0.670814 | -0.0378  | 0.953606 |    |
| AT1G57710 | AT1G57710 | 0         | 0        | 0        | 0        | 0        | 0        | 0.889303 | 0        | 0        | 0        | 0        | 0         | #N/A     | #N/A     | #N/A     | #N/A     | #N/A     | #N/A     |    |
| AT1G57720 | AT1G57720 | 1946.236  | 1882.38  | 1829.757 | 2043.519 | 1813.835 | 2165.138 | 1871.984 | 2011.051 | 1957.373 | 1325.119 | 1238.541 | 1629.481  | 0.0884   | 0.57563  | 0.044924 | 0.805213 | -0.42652 | 0.010798 |    |
| AT1G57730 | AT1G57730 | 0         | 0        | 0        | 0        | 0        | 0        | 0.889303 | 0        | 0        | 0        | 0        | 0         | 0        | NA       | 0.160764 | NA       | 0        | NA       |    |
| AT1G57740 | AT1G57740 | 0         | 0        | 0        | 0        | 0        | 0        | 0        | 0        | 0        | 0        | 1.330334 | 0         | 0        | NA       | 0        | NA       | 0        | 0.172362 | NA |
| AT1G57750 | CYP96A15  | 111.757   | 101.702  | 55.36914 | 18.5587  | 17.22415 | 6.977885 | 7.114428 | 11.86779 | 5.857476 | 179.4332 | 215.5141 | 161.6014  | -2.37031 | 1.77E-14 | -0.30285 | 2.73E-18 | 1.007228 | 0.006002 |    |
| AT1G57760 | AT1G57760 | 0         | 0        | 1.287654 | 0        | 0        | 0        | 0.889303 | 0        | 0        | 0        | 0        | 0         | -0.22368 | NA       | -0.20864 | NA       | -0.02973 | NA       |    |
| AT1G57765 | AT1G57765 | 146.2352  | 128.4657 | 141.642  | 188.8863 | 215.3019 | 163.4819 | 149.403  | 122.9935 | 208.9166 | 142.9708 | 152.9884 | 174.0323  | 0.433363 | 0.054815 | 0.199516 | 0.458632 | 0.164398 | 0.712267 |    |
| AT1G57770 | AT1G57770 | 428.0054  | 472.8252 | 449.3914 | 298.5889 | 264.3244 | 244.226  | 497.1206 | 549.155  | 442.2394 | 474.9701 | 504.1966 | 456.8348  | -0.72136 | 1.31E-07 | 0.140686 | 0.409254 | 0.088971 | 0.766647 |    |
| AT1G57775 | AT1G57775 | 0         | 0        | 0        | 0        | 0        | 0        | 0.889303 | 0        | 0        | 0        | 0        | 0         | 0        | NA       | 0        | NA       | 0.172362 | NA       |    |
| AT1G57777 | AT1G57777 | 0         | 0        | 0        | 0        | 0        | 0        | 0.889303 | 0        | 0        | 0        | 0        | 0         | 0        | NA       | 0.160764 | NA       | 0        | NA       |    |
| AT1G57780 | AT1G57780 | 0         | 0        | 2.575309 | 0        | 0        | 0        | 1.993682 | 0.889303 | 0        | 0.976246 | 0.995936 | 3.991002  | 3.10772  | -0.21648 | 0.769337 | -0.13259 | 0.867868 | 0.594368 | NA |
| AT1G57790 | AT1G57790 | 84.41218  | 105.2705 | 108.163  | 127.8488 | 133.1559 | 129.5893 | 104.9378 | 116.5201 | 97.6246  | 98.83217 | 79.82004 | 95.3034   | 0.389409 | 0.053838 | 0.102053 | 0.700094 | -0.10134 | 0.827306 |    |
| AT1G57800 | ORTH3     | 0         | 0        | 0        | 0        | 0        | 0        | 0        | 0        | 2.15778  | 0        | 0        | 0         | 0        | NA       | 0.266481 | NA       | 0        | NA       |    |
| AT1G57810 | AT1G57810 | 0         | 0        | 0        | 0.412416 | 0        | 0        | 0        | 0.889303 | 0        | 0        | 0        | 0         | 0.066991 | NA       | 0.136991 | NA       | 0        | NA       |    |
| AT1G57820 | ORTH2     | 186.6579  | 196.2671 | 172.5457 | 148.0572 | 131.831  | 182.4219 | 109.3843 | 118.6779 | 119.102  | 224.5313 | 180.9254 | 212.3608  | -0.26718 | 0.171429 | -0.66006 | 0.000455 | 0.159212 | 0.64981  |    |
| AT1G57830 | AT1G57830 | 0         | 0        | 0        | 0        | 0        | 0        | 0        | 0        | 0        | 0        | 0        | 0         | #N/A     | #N/A     | #N/A     | #N/A     | #N/A     | #N/A     |    |
| AT1G57835 | AT1G57835 | 0         | 0        | 0        | 0        | 0        | 0        | 0        | 0        | 0        | 0        | 0        | 0         | #N/A     | #N/A     | #N/A     | #N/A     | #N/A     | #N/A     |    |
| AT1G57840 | AT1G57840 | 1.188904  | 0        | 0        | 1.237247 | 0.662467 | 0.996841 | 0        | 1.07889  | 1.952492 | 0        | 1.330334 | 1.035907  | 0.269545 | NA       | 0.26238  | NA       | 0.122142 | NA       |    |
| AT1G57850 | AT1G57850 | 1.188904  | 0        | 1.287654 | 0        | 0.662467 | 0        | 0.889303 | 2.15778  | 1.952492 | 0        | 1.330334 | 0         | -0.43396 | NA       | 0.360834 | NA       | -0.24517 | NA       |    |
| AT1G57860 | RPL21F    | 488.6395  | 608.4279 | 643.8272 | 780.7027 | 674.3917 | 570.1929 | 532.6928 | 565.3383 | 649.2036 | 573.8023 | 488.2326 | 647.4416  | 0.219126 | 0.264998 | 0.006571 | 0.979682 | -0.02223 | 0.963148 |    |
| AT1G57870 | AK5F      | 271.0701  | 308.6746 | 346.379  | 345.6043 | 327.9213 | 333.9417 | 398.408  | 412.136  | 261.6339 | 331.9993 | 297.9948 | 306.6283  | 0.120166 | 0.593158 | 0.206922 | 0.351884 | 0.017967 | 0.937083 |    |
| AT1G57906 | AT1G57906 | 0         | 0        | 0        | 0        | 0        | 0        | 0.889303 | 0        | 0        | 0        | 0        | 0         | 0        | NA       | 0.488699 | NA       | 0        | NA       |    |
| AT1G57943 | PU1P7     | 8.322328  | 3.568492 | 2.575309 | 3.299325 | 5.962205 | 6.977885 | 6.225124 | 8.63112  | 8.786214 | 0.995936 | 1.330334 | 2.071813  | 0.059027 | 0.941357 | 0.508275 | 0.467849 | -0.9548  | NA       |    |
| AT1G57980 | PU22      | 136.724   | 189.1301 | 172.5457 | 68.8734  | 64.25933 | 100.6809 | 130.7276 | 142.4135 | 127.8822 | 175.595  | 191.5681 | 191.6427  | -1.07829 | 5.82E-08 | -0.29663 | 0.260634 | 0.169419 | 0.669283 |    |
| AT1G57990 | PU18      | 420.872   | 458.5512 | 427.5012 | 528.7168 | 630.6688 | 1153.345 | 1845.305 | 1797.431 | 1896.846 | 362.7045 | 391.1182 | 376.0341  | 0.78838  | 0.000714 | 2.00913  | 2.3E-20  | -0.20175 | 0.662311 |    |
| AT1G58007 | AT1G58007 | 3.566712  | 0        | 3.862963 | 2.062078 | 3.312336 | 0        | 2.66791  | 0        | 0        | 0        | 0        | 0         | -0.26254 | 0.740442 | -0.23888 | 0.778696 | 0.620164 | NA       |    |
| AT1G58010 | AT1G58010 | 1.188904  | 0        | 0        | 0        | 0        | 0        | 0.889303 | 0        | 0        | 0        | 0        | 0         | -0.20902 | NA       | -0.03919 | NA       | -0.19148 | NA       |    |
| AT1G58020 | AT1G58020 | 2.377808  | 0        | 0        | 0        | 0        | 0        | 0.889303 | 0        | 0.976246 | 0        | 0        | 0.2071813 | -0.4575  | NA       | -0.0788  | NA       | -0.04885 | NA       |    |
| AT1G58025 | AT1G58025 | 306.7372  | 253.3629 | 300.0235 | 299.8261 | 276.2489 | 307.027  | 304.1418 | 290.2214 | 269.4439 | 334.8779 | 286.0218 | 344.9569  | 0.028937 | 0.883794 | -0.00075 | 0.997214 | 0.161678 | 0.555713 |    |
| AT1G58030 | CAT2      | 807.2658  | 836.8114 | 699.1963 | 671.4126 | 588.9334 | 734.6717 | 834.1667 | 887.9264 | 725.3508 | 542.1376 | 541.4459 | 513.8096  | -0.22953 | 0.124597 | 0.063331 | 0.735411 | -0.54406 | 0.001276 |    |
| AT1G58037 | AT1G58037 | 0         | 0        | 1.287654 | 0        | 0        | 0        | 0.996841 | 0        | 0        | 0        | 1.330334 | 0         | -0.06909 | NA       | -0.22447 | NA       | -0.01175 | NA       |    |
| AT1G58040 | AT1G58040 | 0         | 0        | 0        | 0        | 0        | 0        | 0        | 0        | 0        | 0        | 0        | 0         | #N/A     | #N/A     | #N/A     | #N/A     | #N/A     | #N/A     |    |
| AT1G58050 | AT1G58050 | 0         | 1.784246 | 0        | 0        | 0.662467 | 0.996841 | 0.889303 | 1.07889  | 0        | 0        | 0        | 3.10772   | -0.03014 | NA       | 0.05645  | NA       | 0.230787 | NA       |    |
| AT1G58055 | AT1G58055 | 0         | 0        | 0        | 0        | 0        | 0        | 0        | 0        | 0        | 0        | 0        | 0         | #N/A     | #N/A     | #N/A     | #N/A     | #N/A     | #N/A     |    |
| AT1G58060 | AT1G58060 | 315.0595  | 306.8903 | 240.7914 | 215.2809 | 178.8662 | 257.1849 | 295.2488 | 309.6414 | 175.7243 | 288.8202 | 304.6465 | 273.4793  | -0.39522 | 0.097394 | -0.13861 | 0.633398 | 0.007268 | 0.990831 |    |
| AT1G58070 | AT1G58070 | 60.6341   | 83.89596 | 63.09506 | 41.65397 | 31.79843 | 44.85784 | 28.45771 | 24.81447 | 30.26363 | 73.88424 | 81.15037 | 53.86714  | -0.76087 | 0.005029 | -1.21596 | 1.86E-05 | 0.020616 | 0.979012 |    |
| AT1G58080 | HISN1A    | 801.3213  | 702.9929 | 673.4432 | 464.7924 | 423.3166 | 426.6479 | 550.4789 | 486.5794 | 552.5552 | 595.8716 | 675.8097 | 669.1956  | -0.7191  | 4.17E-09 | -0.44981 | 0.000527 | -0.16743 | 0.458715 |    |
| AT1G58090 | AT1G58090 | 0         | 0        | 0        | 0        | 0        | 0        | 0        | 0        | 0        | 0        | 1.330334 | 0         | 0        | NA       | 0        | NA       | 0.172362 | NA       |    |
| AT1G58100 | TCP8      | 149.8019  | 178.4246 | 169.9704 | 271.3694 | 255.7124 | 247.2165 | 199.204  | 219.0147 | 318.2562 | 144.8899 | 158.3097 | 162.6373  | 0.627178 | 0.00144  | 0.553244 | 0.007366 | -0.09109 | 0.84833  |    |
| AT1G58110 | AT1G58110 | 211.6249  | 196.2671 | 173.8333 | 229.3031 | 198.0777 | 251.2039 | 225.8831 | 276.1958 | 209.8929 | 164.0806 | 162.3007 | 169.8887  | 0.213436 | 0.271858 | 0.2828   | 0.153644 | -0.22411 | 0.487822 |    |
| AT1G58120 | AT1G58120 | 0         | 0        | 0        | 0        | 0        | 0        | 0        | 0        | 0        | 0        | 0        | 0         | #N/A     | #N/A     | #N/A     | #N/A     | #N/A     | #N/A     |    |
| AT1G58122 | CPuORF45  | 0         | 0        | 0        | 0        | 0        | 0        | 0        | 0        | 0        | 0        | 0        | 0         | #N/A     | #N/A     | #N/A     | #N/A     | #N/A     | #N/A     |    |
| AT1G58130 | AT1G58130 | 0         | 0        | 3.862963 | 2.062078 | 3.312336 | 1.993682 | 2.66791  | 2.15778  | 0.976246 | 1.919071 | 0        | 0.2071813 | 0.397071 | 0.595176 | 0.205367 | 0.809461 | 0.005835 | NA       |    |
| AT1G58140 | AT1G58140 | 9.511232  | 10.70548 | 9.01358  | 11.96005 | 14.57428 | 18.93997 | 27.56841 | 32.3667  | 26.35864 | 10.55489 | 11.97301 | 7.251346  | 0.498638 | 0.297342 | 1.378865 | 0.001162 | 0.006117 | NA       |    |
| AT1G58150 | AT1G58150 | 9.511232  | 10.70548 | 14.1642  | 14.02213 | 13.24935 | 9.968408 | 8.893035 | 11.8677  |          |          |          |           |          |          |          |          |          |          |    |

|           |           |          |          |          |          |          |          |          |          |          |          |          |          |          |          |          |          |           |          |
|-----------|-----------|----------|----------|----------|----------|----------|----------|----------|----------|----------|----------|----------|----------|----------|----------|----------|----------|-----------|----------|
| AT1G58848 | RF9       | 840.5551 | 867.1436 | 831.8247 | 581.9184 | 534.6111 | 734.6717 | 844.8383 | 922.4509 | 641.3936 | 760.9118 | 697.095  | 797.648  | -0.45058 | 0.008744 | -0.07476 | 0.743318 | -0.16651  | 0.600891 |
| AT1G58889 | AT1G58889 | 47.55616 | 32.11643 | 24.46543 | 33.81808 | 28.48609 | 50.83888 | 32.90423 | 30.20892 | 38.07359 | 54.69353 | 39.91002 | 50.75942 | 0.070384 | 0.871125 | -0.04996 | 0.91668  | 0.443789  | 0.432745 |
| AT1G58936 | AT1G58936 | 0        | 0        | 0        | 1.324935 | 0        | 0        | 0        | 0        | 0.976246 | 0.995936 | 1.330334 | 1.035907 | 0.21801  | NA       | 0.51433  | NA       | 0.532942  | NA       |
| AT1G58983 | RP52B     | 1067.636 | 1111.585 | 1143.437 | 1305.295 | 1282.537 | 1279.944 | 988.0162 | 955.8965 | 1357.958 | 1093.871 | 957.8405 | 1089.774 | 0.216375 | 0.182579 | -0.00862 | 0.968342 | -0.07857  | 0.81058  |
| AT1G59030 | AT1G59030 | 4.755616 | 3.568492 | 5.150617 | 0        | 0.662467 | 0        | 0        | 0        | 1.952492 | 9.595356 | 13.30334 | 14.50269 | -1.79194 | 0.00375  | -1.32418 | 0.044686 | 1.205633  | NA       |
| AT1G59077 | AT1G59077 | 0        | 0        | 0        | 0        | 0        | 0        | 0.889303 | 0        | 0        | 0        | 0        | 0        | 0.160764 | NA       | 0.00735  | NA       | 0         | NA       |
| AT1G59124 | AT1G59124 | 919.0228 | 888.5545 | 844.7012 | 584.3929 | 531.2988 | 792.4884 | 944.4403 | 1070.259 | 738.042  | 829.9983 | 699.7557 | 862.9101 | -0.46772 | 0.014234 | 0.052099 | 0.842388 | -0.14408  | 0.699441 |
| AT1G59171 | AT1G59171 | 0        | 0        | 0        | 0.412416 | 0        | 0        | 0.996841 | 0        | 1.952492 | 0        | 1.330334 | 0        | 0.456018 | NA       | 0.320981 | NA       | 0.190124  | NA       |
| AT1G59218 | RF9       | 785.8655 | 815.4004 | 705.6346 | 527.0671 | 473.0016 | 723.7064 | 718.5572 | 785.4319 | 547.674  | 684.1489 | 662.5063 | 697.1651 | -0.41426 | 0.030947 | -0.16479 | 0.470531 | -0.16956  | 0.632849 |
| AT1G59265 | AT1G59265 | 40.42273 | 23.1952  | 33.47901 | 31.756   | 25.17376 | 30.90206 | 30.23632 | 32.3667  | 25.3824  | 34.54328 | 54.54369 | 38.32854 | -0.16094 | 0.684255 | -0.16089 | 0.711129 | 0.322609  | 0.591092 |
| AT1G59312 | AT1G59312 | 0        | 0        | 1.287654 | 0        | 0        | 0        | 1.778607 | 1.07889  | 0        | 0        | 0        | 0        | -0.29959 | NA       | 0.235599 | NA       | 0.11957   | NA       |
| AT1G59359 | RP52B     | 1129.459 | 1141.917 | 1135.711 | 1264.466 | 1262     | 1174.278 | 1001.356 | 1007.683 | 1358.934 | 1180.229 | 832.7891 | 1158.143 | 0.117688 | 0.560971 | -0.01624 | 0.946937 | -0.09964  | 0.781928 |
| AT1G59406 | AT1G59406 | 3.566712 | 7.136984 | 5.150617 | 0        | 0.662467 | 0        | 0        | 0        | 0        | 13.4335  | 18.62468 | 17.61041 | -1.95979 | 0.001246 | -1.85111 | 0.003031 | 1.478232  | NA       |
| AT1G59453 | AT1G59453 | 0        | 0        | 0        | 0        | 0        | 0        | 0.996841 | 0        | 1.07889  | 0        | 0        | 0        | 0.134295 | NA       | 0.152414 | NA       | 0         | NA       |
| AT1G59500 | GH3.4     | 0        | 0        | 0        | 0.824831 | 0.662467 | 0        | 0.889303 | 0        | 0        | 0        | 1.330334 | 0        | 0.287769 | NA       | 0.150511 | NA       | 0.197762  | NA       |
| AT1G59510 | CF9       | 36.85602 | 37.46917 | 48.93086 | 38.76706 | 31.79843 | 39.87363 | 45.35448 | 55.02339 | 34.16861 | 42.21957 | 47.89202 | 56.97486 | -0.15832 | 0.660393 | 0.109758 | 0.786508 | 0.23465   | 0.687982 |
| AT1G59520 | CW7       | 140.2907 | 151.6609 | 163.5321 | 214.4561 | 200.7276 | 171.4566 | 198.3147 | 168.3068 | 183.5342 | 140.0922 | 171.6131 | 183.3555 | 0.367625 | 0.050153 | 0.269344 | 0.197959 | 0.114723  | 0.770425 |
| AT1G59530 | ATB2IP4   | 0        | 0        | 0        | 0        | 0        | 0        | 2.15778  | 0.75246  | 0        | 0        | 0        | 0        | 0.488699 | NA       | 0        | NA       | 0         | NA       |
| AT1G59535 | AT1G59535 | 0        | 0        | 0        | 0        | 0        | 0        | 0        | 0        | 0        | 0        | 0        | 0        | #N/A     | #N/A     | #N/A     | #N/A     | #N/A      | #N/A     |
| AT1G59540 | ZCF125    | 89.1678  | 80.29107 | 86.27284 | 89.9066  | 116.5942 | 105.6651 | 98.71269 | 112.2046 | 90.79088 | 106.5085 | 94.45371 | 118.0933 | 0.264208 | 0.257278 | 0.222662 | 0.389854 | 0.308775  | 0.401013 |
| AT1G59550 | AT1G59550 | 0        | 0        | 0        | 0        | 0        | 0        | 0        | 0        | 0        | 0        | 0        | 0        | 0        | NA       | 0        | NA       | 0.172362  | NA       |
| AT1G59560 | ZCF61     | 29.7226  | 46.3904  | 38.62963 | 58.97543 | 45.04777 | 47.84836 | 34.68284 | 46.39227 | 62.47974 | 38.38143 | 65.18636 | 43.50807 | 0.404627 | 0.242316 | 0.313569 | 0.417791 | 0.332997  | 0.576458 |
| AT1G59570 | AT1G59570 | 0        | 0        | 0        | 0        | 0        | 0        | 0        | 0        | 0        | 0        | 1.330334 | 0        | 0        | NA       | 0        | NA       | 0.172362  | NA       |
| AT1G59580 | MPK2      | 498.1508 | 504.9416 | 479.0074 | 504.3842 | 522.6867 | 581.1582 | 533.5821 | 473.6327 | 465.6693 | 417.398  | 401.7609 | 382.2495 | 0.113203 | 0.435337 | -0.00671 | 0.97093  | -0.29837  | 0.109159 |
| AT1G59590 | ZCF37     | 76.08985 | 114.1917 | 83.69753 | 334.0566 | 412.0546 | 473.4994 | 522.0211 | 371.1381 | 594.5338 | 71.00564 | 95.78405 | 76.65708 | 2.082869 | 3.94E-21 | 2.365492 | 5.14E-27 | -0.15754  | 0.769306 |
| AT1G59600 | ZCW7      | 134.3461 | 153.4452 | 154.5185 | 162.9042 | 168.2667 | 119.6209 | 141.3993 | 151.0446 | 232.3465 | 126.6587 | 141.0154 | 151.2424 | 0.038008 | 0.902752 | 0.240693 | 0.379392 | -0.0741   | 0.893141 |
| AT1G59610 | DRP2B     | 1281.638 | 1111.585 | 991.4938 | 834.7291 | 807.5476 | 979.8945 | 1053.825 | 1141.466 | 1010.415 | 1048.772 | 1032.339 | 930.2441 | -0.36686 | 0.009442 | -0.07683 | 0.665779 | -0.1674   | 0.504369 |
| AT1G59620 | CW9       | 206.8693 | 219.4623 | 208.6    | 223.5292 | 188.1407 | 258.1818 | 217.8794 | 276.1958 | 202.0829 | 167.9187 | 141.0154 | 193.7145 | 0.072387 | 0.770222 | 0.129275 | 0.600912 | -0.32112  | 0.3173   |
| AT1G59630 | AT1G59630 | 0        | 0        | 0        | 0        | 0        | 0        | 0        | 1.07889  | 0        | 0        | 0        | 0        | 0.16673  | NA       | 0        | NA       | 0         | NA       |
| AT1G59640 | BPE       | 29.7226  | 28.54794 | 29.61605 | 40.41673 | 45.71024 | 38.87679 | 35.57214 | 47.47116 | 36.1211  | 43.1791  | 46.56169 | 36.25673 | 0.474548 | 0.13147  | 0.398469 | 0.255268 | 0.475268  | 0.340335 |
| AT1G59650 | CW14      | 54.68958 | 40.39554 | 178.984  | 161.6669 | 161.642  | 182.4219 | 182.3072 | 147.8079 | 136.6744 | 176.5546 | 146.3367 | 157.4578 | 0.115943 | 0.607178 | 0.011407 | 0.966928 | 0.053139  | 0.909065 |
| AT1G59660 | NUP98B    | 54.68958 | 46.3904  | 43.78025 | 197.5471 | 166.2793 | 196.3745 | 141.3993 | 144.5713 | 83.95716 | 29.7456  | 21.28534 | 27.96948 | 1.86502  | 1.85E-14 | 1.282242 | 5.93E-07 | -0.79573  | 0.054926 |
| AT1G59670 | GSTU15    | 0        | 1.784246 | 0        | 2.474493 | 0.662467 | 2.990522 | 0.889303 | 1.07889  | 0        | 0.959536 | 0        | 0        | 0.688533 | 0.276143 | 0.052953 | 0.946639 | -0.10411  | NA       |
| AT1G59675 | AT1G59675 | 0        | 0        | 0        | 0        | 0        | 0        | 0        | 0        | 0        | 0        | 0        | 0        | #N/A     | #N/A     | #N/A     | #N/A     | #N/A      | #N/A     |
| AT1G59680 | EDA1      | 1.188904 | 0        | 0        | 0        | 0        | 0        | 0        | 1.07889  | 0        | 0        | 0        | 0        | -0.2127  | NA       | -0.02202 | NA       | -0.1938   | NA       |
| AT1G59690 | AT1G59690 | 0        | 0        | 0        | 0        | 0        | 0        | 0        | 0        | 0        | 0        | 0        | 0        | #N/A     | #N/A     | #N/A     | #N/A     | #N/A      | #N/A     |
| AT1G59700 | GSTU16    | 190.2246 | 217.678  | 203.4494 | 225.5913 | 258.3622 | 225.286  | 227.6617 | 160.7546 | 275.3014 | 268.67   | 305.9768 | 272.4434 | 0.212297 | 0.337416 | 0.121516 | 0.635094 | 0.459936  | 0.1045   |
| AT1G59710 | AT1G59710 | 197.3581 | 215.8938 | 207.3123 | 336.5311 | 382.9061 | 388.7679 | 274.7948 | 265.4069 | 340.7099 | 168.8783 | 145.0064 | 177.14   | 0.822148 | 1.31E-07 | 0.499805 | 0.003205 | -0.32243  | 0.234675 |
| AT1G59720 | PCMP-H51  | 52.31177 | 51.74313 | 74.63895 | 26.80701 | 22.52389 | 25.91786 | 40.90796 | 39.91893 | 26.35864 | 55.65307 | 54.54369 | 62.15439 | -1.18164 | 0.000019 | -0.70345 | 0.019371 | -0.05276  | 0.942127 |
| AT1G59722 | AT1G59722 | 0        | 0        | 0        | 0        | 0        | 0        | 0        | 0        | 0        | 0        | 0        | 0        | #N/A     | #N/A     | #N/A     | #N/A     | #N/A      | #N/A     |
| AT1G59725 | AT1G59725 | 0        | 0        | 0        | 0        | 1.987402 | 0        | 0        | 0        | 0        | 0        | 0        | 0        | 0.260054 | NA       | 0        | NA       | 0         | NA       |
| AT1G59730 | TRX7      | 0        | 1.287654 | 0.412416 | 0        | 0.996841 | 1.778607 | 0        | 0        | 0.959536 | 0        | 0        | 0        | -0.00787 | NA       | 0.084076 | NA       | -0.05413  | NA       |
| AT1G59740 | NP4.3     | 36.85602 | 28.54794 | 38.2284  | 39.17948 | 29.14856 | 40.87047 | 59.58333 | 44.23449 | 22.45366 | 25.90746 | 35.91902 | 32.1131  | 0.188841 | 0.664738 | 0.388613 | 0.356937 | -0.0155   | 0.988816 |
| AT1G59750 | ARF1      | 682.4309 | 797.558  | 721.0864 | 578.6191 | 556.4725 | 621.0318 | 612.7301 | 632.2295 | 464.6931 | 673.594  | 687.7827 | 670.2315 | -0.3204  | 0.030226 | -0.35722 | 0.018532 | -0.11167  | 0.697215 |
| AT1G59760 | AT1G59760 | 429.1943 | 369.3389 | 386.2963 | 251.5735 | 258.3622 | 313.008  | 291.6915 | 348.4815 | 229.4178 | 334.8779 | 383.1362 | 382.2495 | -0.52384 | 0.0031   | -0.44107 | 0.018502 | -0.10835  | 0.77299  |
| AT1G59770 | AT1G59770 | 0        | 0        | 0        | 0        | 0        | 0        | 0        | 0        | 0        | 0        | 0        | 0        | #N/A     | #N/A     | #N/A     | #N/A     | #N/A      | #N/A     |
| AT1G59780 | AT1G59780 | 0        | 1.287654 | 3.299325 | 1.987402 | 1.993682 | 2.66791  | 0        | 0        | 0.959536 | 1.330334 | 1.035907 | 0        | 0.827172 | 0.20386  | 0.191321 | 0.812136 | 0.267502  | NA       |
| AT1G59790 | AT1G59790 | 1.188904 | 0        | 0        | 0.662467 | 0        | 1.778607 | 0        | 1.919071 | 0        | 0        | 0        | 0        | -0.11692 | NA       | 0.080008 | NA       | 0.10213   | NA       |
| AT1G59800 | AT1G59800 | 0        | 0        | 0        | 0        | 0        | 0        | 1.07889  | 0        | 0        | 0        | 0        | 0        | 0        | NA       | 0.16673  | NA       | 0         | NA       |
| AT1G59810 | AGL50     | 0        | 0        | 0        | 0        | 0        | 0        | 2.15778  | 0        | 0        | 0        | 0        | 0        | 0.266481 | NA       | 0.026481 | NA       | 0         | NA       |
| AT1G59820 | ALA3      | 322.193  | 231.952  | 260.1062 | 223.1168 | 163.6294 | 284.0996 | 265.9017 | 338.7714 | 149.3656 | 226.4504 | 183.5861 | 217.5404 | -0.27194 | 0.389645 | -0.10916 | 0.771779 | -0.35714  | 0.46317  |
| AT1G59830 | PP2A1     | 412.5497 | 504.9416 | 440.3778 | 473.0407 | 514.0746 | 460.5404 | 450.8769 | 482.2638 | 539.864  | 349.271  | 401.7609 | 395.7163 | 0.097735 | 0.558194 | 0.121062 | 0.484111 | -0.23721  | 0.30483  |
| AT1G59833 | AT1G59833 | 0        | 0        | 0        | 0        | 0        | 0        | 0        | 0        | 0        | 0        | 0        | 0        | #N/A     | #N/A     | #N/A     | #N/A     | #N/A      | #N/A     |
| AT1G59835 | AT1G59835 | 0        | 0        | 0        | 0        | 0        | 0        | 0        | 0        | 0        | 0        | 0        | 0        | #N/A     | #N/A     | #N/A     | #N/A     | #N/A      | #N/A     |
| AT1G59840 | CCB4      | 237.7808 | 221.2465 | 242.079  | 152.1813 | 179.5286 | 177.4377 | 230.3296 | 202.8313 | 237.2278 | 229.329  | 199.5501 | 280.7307 | -0.46256 | 0.008328 | -0.06459 | 0.786961 | -0.019136 | 0.968799 |
| AT1G59850 | AT1G59850 | 4.755616 | 12.48972 | 6.438272 | 8.660727 | 5.962205 | 14.95261 | 7.114428 | 15.10446 | 7.809968 | 8.635821 | 10.64267 | 4.143626 | 0.258406 | 0.689533 | 0.268388 | 0.664719 | 0.014304  | NA       |
| AT1G59860 | HSP17.6A  | 13.07794 | 5.352738 | 5.150617 | 7.42348  | 8.612075 | 12.95893 | 8.003731 | 5.39445  | 14.64369 | 6.716749 | 7.982004 | 11.39497 | 0.163474 | 0.805884 | 0.16396  | 0.819722 | 0.077042  | NA       |
| AT1G59865 | AT1G59865 | 5.94452  | 8.92123  | 2.5757   |          |          |          |          |          |          |          |          |          |          |          |          |          |           |          |

|           |           |          |          |          |          |          |          |          |          |          |          |          |          |   |   |          |          |          |          |           |          |          |    |
|-----------|-----------|----------|----------|----------|----------|----------|----------|----------|----------|----------|----------|----------|----------|---|---|----------|----------|----------|----------|-----------|----------|----------|----|
| AT1G60300 | AT1G60300 | 1.188904 | 0        | 0        | 0        | 0        | 0        | 0        | 0.889303 | 0        | 0        | 0        | 0        | 0 | 0 | 0        | -0.20902 | NA       | -0.03919 | NA        | -0.19148 | NA       |    |
| AT1G60310 | AT1G60310 | 0        | 0        | 0        | 0        | 0        | 0        | 0        | 0.889303 | 0        | 0        | 0        | 0        | 0 | 0 | 0        | 0        | 0        | NA       | 0.160764  | NA       | 0        | NA |
| AT1G60320 | AT1G60320 | 0        | 0        | 0        | 0        | 0        | 0        | 0        | 0        | 0        | 0        | 0        | 0        | 0 | 0 | 0        | 0        | 0        | NA       | NA        | NA       | NA       | NA |
| AT1G60330 | AT1G60330 | 0        | 0        | 0        | 0        | 0        | 0.662467 | 0        | 0        | 0        | 0        | 0        | 1.330334 | 0 | 0 | 0        | 0.101524 | NA       | 0        | NA        | 0.179327 | NA       |    |
| AT1G60340 | AT1G60340 | 2.377808 | 0        | 0        | 0        | 0        | 0        | 0        | 0        | 0        | 0        | 1.330334 | 0        | 0 | 0 | 0        | -0.38599 | NA       | -0.36442 | NA        | -0.16306 | NA       |    |
| AT1G60350 | anac024   | 0        | 1.784246 | 0        | 0.824831 | 0        | 0        | 0        | 0        | 0        | 0        | 1.330334 | 0        | 0 | 0 | 0        | -0.08369 | NA       | -0.25512 | NA        | -0.04342 | NA       |    |
| AT1G60360 | AT1G60360 | 3.566712 | 1.784246 | 9.01358  | 2.062078 | 1.987402 | 1.993682 | 1.778607 | 0        | 2.928738 | 5.757214 | 2.660668 | 5.179533 | 0 | 0 | 0        | -0.78323 | 0.245491 | -0.90316 | 0.196565  | -0.04636 | NA       |    |
| AT1G60370 | AT1G60370 | 0        | 0        | 0        | 0        | 0        | 0        | 0        | 0        | 0        | 0        | 0        | 0        | 0 | 0 | 0        | 0        | 0        | NA       | NA        | NA       | NA       | NA |
| AT1G60380 | AT1G60380 | 2.377808 | 0        | 0        | 0        | 0.824831 | 0.662467 | 0        | 0        | 0        | 0.976246 | 0        | 0        | 0 | 0 | 0        | -0.11316 | NA       | -0.23141 | NA        | -0.40513 | NA       |    |
| AT1G60390 | PG1       | 63.01191 | 32.11643 | 42.49259 | 30.10634 | 28.48609 | 20.93366 | 24.9005  | 29.13003 | 22.45366 | 27.82653 | 50.55269 | 34.18492 | 0 | 0 | 0        | -0.73109 | 0.031318 | -0.80478 | 0.025374  | -0.3096  | 0.625212 |    |
| AT1G60400 | AT1G60400 | 0        | 1.784246 | 0        | 0        | 0        | 0        | 0        | 0        | 0        | 0        | 0        | 0        | 0 | 0 | 0        | -0.26841 | NA       | -0.25035 | NA        | -0.06249 | NA       |    |
| AT1G60410 | AT1G60410 | 1.188904 | 0        | 0        | 0.412416 | 0        | 0.996841 | 0        | 0        | 0        | 0        | 0        | 0        | 0 | 0 | 0        | 0.040757 | NA       | -0.23    | NA        | -0.22302 | NA       |    |
| AT1G60420 | AT1G60420 | 345.971  | 381.8287 | 314.1877 | 368.6995 | 357.0699 | 399.7332 | 414.4154 | 391.637  | 413.9283 | 258.1151 | 283.3611 | 297.3052 | 0 | 0 | 0        | 0.112202 | 0.478691 | 0.231082 | 0.127016  | -0.30489 | 0.143173 |    |
| AT1G60430 | ARPC3     | 92.73451 | 128.4657 | 130.0531 | 126.1992 | 137.7932 | 132.5798 | 127.1704 | 118.6779 | 126.912  | 104.5894 | 105.0964 | 119.1293 | 0 | 0 | 0        | 0.179521 | 0.411111 | 0.095732 | 0.1070269 | -0.08057 | 0.86125  |    |
| AT1G60440 | PANK1     | 116.5126 | 119.5445 | 119.7519 | 208.2699 | 189.4656 | 207.3429 | 212.5435 | 222.2513 | 166.9381 | 114.1847 | 86.47171 | 149.1705 | 0 | 0 | 0        | 0.744829 | 0.000261 | 0.000457 | 0.000457  | -0.01397 | 0.983137 |    |
| AT1G60450 | GLS7      | 0        | 0        | 0        | 0.412416 | 0        | 0        | 1.778607 | 0        | 0        | 0        | 0        | 0        | 0 | 0 | 0        | 0.060593 | NA       | 0.260815 | NA        | 0        | NA       |    |
| AT1G60460 | AT1G60460 | 14.26685 | 24.97944 | 16.73951 | 13.1973  | 17.88662 | 19.93682 | 10.67164 | 11.86779 | 10.73871 | 20.15025 | 11.97301 | 21.75404 | 0 | 0 | 0        | -0.11244 | 0.830839 | -0.61833 | 0.201797  | 0.00574  | 0.996189 |    |
| AT1G60470 | GLS5      | 1.188904 | 0        | 1.287654 | 13.1973  | 11.26194 | 11.96209 | 22.23259 | 7.55223  | 8.786214 | 0        | 0        | 0        | 0 | 0 | 0        | 2.132942 | 0.000198 | 2.186455 | 0.000174  | -0.33049 | NA       |    |
| AT1G60480 | AT1G60480 | 4.755616 | 5.352738 | 3.862963 | 1.649662 | 2.649869 | 2.990522 | 4.446517 | 6.47334  | 0.976246 | 1.919071 | 2.660668 | 5.179533 | 0 | 0 | 0        | -0.61746 | 0.368534 | -0.13851 | 0.871211  | -0.3092  | NA       |    |
| AT1G60490 | ATVP534   | 464.8614 | 535.2738 | 464.8432 | 511.8077 | 484.926  | 565.2087 | 535.3607 | 563.1805 | 360.2348 | 414.5194 | 371.1632 | 421.614  | 0 | 0 | 0        | 0.091644 | 0.677762 | -0.00376 | 0.988234  | -0.26907 | 0.368214 |    |
| AT1G60500 | DRP4C     | 1.188904 | 7.136984 | 2.575309 | 2.886909 | 1.987402 | 4.984204 | 2.66791  | 2.15778  | 2.928738 | 1.919071 | 1.330334 | 2.071813 | 0 | 0 | 0        | -0.03028 | 0.971481 | -0.20948 | 0.806396  | -0.47434 | NA       |    |
| AT1G60505 | AT1G60505 | 13.07794 | 16.05821 | 10.30123 | 13.60971 | 7.949607 | 13.95577 | 8.893035 | 10.7889  | 18.54867 | 7.676285 | 5.321336 | 15.5386  | 0 | 0 | 0        | -0.10874 | 0.860665 | -0.02084 | 0.975995  | -0.34331 | NA       |    |
| AT1G60510 | DRP4D     | 2.377808 | 0        | 0        | 0.412416 | 1.324935 | 0.996841 | 1.778607 | 4.31556  | 0.976246 | 4.797678 | 1.330334 | 1.035907 | 0 | 0 | 0        | -0.08208 | 0.92227  | 0.525979 | 0.479679  | 0.562829 | NA       |    |
| AT1G60520 | AT1G60520 | 0        | 0        | 0        | 0        | 0        | 0        | 0        | 0        | 0        | 0        | 0        | 0        | 0 | 0 | 0        | NA       | NA       | NA       | NA        | NA       | NA       |    |
| AT1G60525 | AT1G60525 | 53.50068 | 26.76369 | 48.93086 | 34.23049 | 38.4231  | 56.81992 | 52.46891 | 48.55005 | 37.09735 | 42.21957 | 43.90102 | 58.01077 | 0 | 0 | 0        | -0.05569 | 0.885619 | 0.062534 | 0.889789  | 0.120906 | 0.889726 |    |
| AT1G60530 | DRP4A     | 0        | 0        | 0        | 0        | 0        | 0.996841 | 0        | 0        | 0        | 0        | 1.330334 | 0        | 0 | 0 | 0        | 0.136618 | NA       | 0        | NA        | 0.179947 | NA       |    |
| AT1G60540 | DRP4B     | 0        | 0        | 0        | 0        | 0        | 0        | 0        | 0        | 0        | 0        | 0        | 0        | 0 | 0 | 0        | NA       | NA       | NA       | NA        | NA       | NA       |    |
| AT1G60545 | AT1G60545 | 2.377808 | 5.352738 | 5.150617 | 5.361402 | 5.962205 | 2.990522 | 3.557214 | 5.39445  | 7.809968 | 0        | 0        | 5.179533 | 0 | 0 | 0        | 0.16039  | 0.838706 | 0.278246 | 0.729026  | -0.64729 | NA       |    |
| AT1G60550 | MENB      | 735.9315 | 877.849  | 834.4    | 711.0045 | 688.3035 | 660.9054 | 651.8595 | 653.8073 | 692.1584 | 1029.582 | 1038.991 | 873.2692 | 0 | 0 | 0        | -0.24182 | 0.062339 | -0.28736 | 0.300411  | 0.256473 | 0.15151  |    |
| AT1G60560 | AT1G60560 | 155.7464 | 173.0719 | 123.6148 | 124.5495 | 130.5061 | 128.5925 | 145.8458 | 131.6246 | 110.3158 | 140.0922 | 194.2288 | 169.8887 | 0 | 0 | 0        | -0.22545 | 0.313667 | -0.20705 | 0.396518  | 0.153464 | 0.702132 |    |
| AT1G60570 | AT1G60570 | 0        | 0        | 0        | 0        | 0        | 0        | 0        | 2.15778  | 0        | 0        | 0        | 0        | 0 | 0 | 0        | 0        | NA       | 0.279709 | 0.965181  | 0.278542 | NA       |    |
| AT1G60580 | AT1G60580 | 0        | 0        | 0        | 0        | 0        | 0        | 0        | 0        | 0        | 0        | 0        | 0        | 0 | 0 | 0        | NA       | NA       | NA       | NA        | NA       | NA       |    |
| AT1G60590 | AT1G60590 | 217.5694 | 171.2876 | 202.1617 | 77.53413 | 80.15854 | 59.81045 | 86.26244 | 72.28563 | 69.31347 | 251.3983 | 206.2018 | 209.2531 | 0 | 0 | 0        | -1.395   | 2.616-11 | -1.34106 | 2.246-12  | 0.167363 | 0.641615 |    |
| AT1G60600 | ARC4      | 496.9618 | 574.5272 | 531.8012 | 523.7678 | 400.1302 | 470.5088 | 593.1654 | 572.8906 | 446.1444 | 554.6116 | 485.5719 | 637.0825 | 0 | 0 | 0        | -0.1937  | 0.315513 | -0.10128 | 0.967606  | 0.0678   | 0.866601 |    |
| AT1G60610 | AT1G60610 | 80.84547 | 82.07532 | 90.1358  | 103.5163 | 101.3575 | 85.72831 | 98.71269 | 118.6779 | 129.8407 | 117.0633 | 119.7301 | 106.6984 | 0 | 0 | 0        | 0.202932 | 0.390061 | 0.438555 | 0.050449  | 0.424095 | 0.184358 |    |
| AT1G60620 | ATRPC4C   | 49.93397 | 66.0171  | 72.10864 | 105.5784 | 78.17114 | 101.6778 | 115.6095 | 100.3368 | 61.5035  | 67.16749 | 66.5167  | 71.47755 | 0 | 0 | 0        | 0.579492 | 0.037269 | 0.53997  | 0.067988  | 0.124352 | 0.846494 |    |
| AT1G60625 | RALF6     | 0        | 0        | 0        | 0        | 0        | 0        | 0        | 0        | 0        | 0        | 0        | 0        | 0 | 0 | 0        | 0        | NA       | 0        | 0         | 0        | 0        |    |
| AT1G60630 | AT1G60630 | 64.20081 | 85.64381 | 60.51975 | 30.55532 | 32.4609  | 43.86099 | 45.35448 | 31.28781 | 28.31113 | 47.97678 | 73.16837 | 49.72351 | 0 | 0 | 0        | -0.86947 | 0.002106 | -0.92175 | 0.001996  | -0.28348 | 0.595011 |    |
| AT1G60640 | AT1G60640 | 296.0371 | 237.3047 | 280.7086 | 361.6885 | 373.6315 | 309.0206 | 319.2599 | 288.0636 | 413.9283 | 283.063  | 276.7095 | 321.131  | 0 | 0 | 0        | 0.34967  | 0.0594   | 0.315028 | 0.111108  | 0.106467 | 0.781547 |    |
| AT1G60650 | RZ1B      | 78.46766 | 110.6233 | 83.69753 | 129.0861 | 108.6446 | 105.6651 | 87.15174 | 92.78453 | 130.817  | 83.4796  | 79.82004 | 76.65708 | 0 | 0 | 0        | 0.346615 | 0.158004 | 0.196894 | 0.492175  | -0.16125 | 0.744131 |    |
| AT1G60660 | CBS1P     | 127.1127 | 157.0137 | 163.5321 | 166.6159 | 182.841  | 131.583  | 133.3955 | 92.78453 | 176.7005 | 166.9592 | 291.3431 | 178.1759 | 0 | 0 | 0        | 0.10503  | 0.76154  | -0.14025 | 0.965283  | -0.47195 | 0.261714 |    |
| AT1G60670 | AT1G60670 | 97.49012 | 94.56504 | 100.437  | 120.4253 | 130.5061 | 110.6493 | 109.3843 | 111.1257 | 133.7457 | 78.68192 | 67.84703 | 132.596  | 0 | 0 | 0        | 0.295726 | 0.26851  | 0.263617 | 0.364568  | -0.0584  | 0.926068 |    |
| AT1G60680 | AGD2      | 3.566712 | 8.92123  | 7.725926 | 9.897974 | 10.59948 | 10.96525 | 8.893035 | 11.86779 | 13.66744 | 0.995936 | 5.321336 | 5.179533 | 0 | 0 | 0        | 0.546327 | 0.341851 | 0.647278 | 0.279634  | -0.56816 | NA       |    |
| AT1G60690 | AT1G60690 | 99.86793 | 108.839  | 130.0531 | 60.21267 | 62.93439 | 58.81361 | 68.04104 | 125.1512 | 83.95716 | 122.8026 | 129.0424 | 106.6984 | 0 | 0 | 0        | -0.86611 | 6.71E-05 | -0.18904 | 0.48701   | 0.076916 | 0.880395 |    |
| AT1G60700 | AT1G60700 | 66.57862 | 101.702  | 91.42346 | 73.40997 | 66.24673 | 80.7441  | 77.3694  | 65.81229 | 50.76479 | 73.88424 | 105.0964 | 89.08796 | 0 | 0 | 0        | -0.2184  | 0.444935 | -0.38606 | 0.177713  | 0.049254 | 0.938606 |    |
| AT1G60710 | ATB2      | 908.3226 | 785.0683 | 923.2482 | 737.399  | 752.5628 | 628.0097 | 666.0839 | 660.2806 | 690.2059 | 927.871  | 840.7711 | 892.9514 | 0 | 0 | 0        | -0.30142 | 0.016581 | -0.37504 | 0.003159  | 0.022424 | 0.495912 |    |
| AT1G60720 | AT1G60720 | 0        | 0        | 1.287654 | 0        | 0        | 0        | 2.66791  | 0        | 0        | 0        | 0        | 0        | 0 | 0 | 0        | -0.22259 | NA       | 0.19551  | NA        | -0.19453 | NA       |    |
| AT1G60730 | AT1G60730 | 65.38972 | 87.42806 | 75.97161 | 259.4094 | 236.5008 | 296.0617 | 392.1828 | 398.1104 | 355.3535 | 55.65307 | 41.24035 | 60.08258 | 0 | 0 | 0        | 1.756373 | 3.51E-22 | 2.284812 | 3.51E-37  | -0.4897  | 0.146938 |    |
| AT1G60740 | PRX1D     | 4.755616 | 3.568492 | 5.150617 | 3.299235 | 2.649869 | 10.96525 | 3.527214 | 3.23667  | 6.833722 | 2.878607 | 2.660668 | 0        | 0 | 0 | 0.165722 | 0.833154 | 0.008866 | 0.992005 | -0.70547  | NA       |          |    |
| AT1G60750 | AT1G60750 | 0        | 0        | 0        | 0.412416 | 0.662467 | 0        | 2.66791  | 3.23667  | 0.976246 | 0.995936 | 0        | 0        | 0 | 0 | 0        | 0.148423 | NA       | 1.053672 | NA        | 0.164881 | NA       |    |
| AT1G60760 | AT1G60760 | 0        | 0        | 0        | 0        | 0        | 0        | 0        | 0        | 0        | 0        | 0        | 0        | 0 | 0 | 0        | NA       | NA       | NA       | NA        | NA       | NA       |    |
| AT1G60770 | AT1G60770 | 263.9367 | 237.3047 | 258.8185 | 220.6423 | 239.8132 | 234.2576 | 205.4291 | 178.0168 | 207.9404 | 204.3811 | 226.1568 | 221.684  | 0 | 0 | 0        | -0.1353  | 0.420871 | -0.35879 | 0.023878  | -0.22471 | 0.371061 |    |
| AT1G60780 | AP1M2     | 1007.002 | 915.3182 | 1037.    |          |          |          |          |          |          |          |          |          |   |   |          |          |          |          |           |          |          |    |

|           |           |          |          |          |          |          |          |          |          |          |          |          |          |           |          |           |          |           |          |
|-----------|-----------|----------|----------|----------|----------|----------|----------|----------|----------|----------|----------|----------|----------|-----------|----------|-----------|----------|-----------|----------|
| AT1G61160 | AT1G61160 | 2.377808 | 0        | 0        | 1.237247 | 1.987402 | 2.990522 | 2.66791  | 0        | 0        | 0.959536 | 0        | 0        | 0.450722  | 0.503872 | 0.020447  | 0.97975  | -0.24686  | NA       |
| AT1G61165 | AT1G61165 | 0        | 0        | 0        | 0        | 0        | 0        | 0        | 0        | 0        | 0        | 1.330334 | 1.035907 | 0         | 0        | 0         | 0        | 0.375122  | NA       |
| AT1G61170 | AT1G61170 | 77.28776 | 51.74313 | 79.83457 | 84.95761 | 80.82101 | 102.6746 | 42.68657 | 59.33895 | 59.55101 | 66.20796 | 67.84703 | 69.40574 | 0.319767  | 0.220098 | -0.38132  | 0.182532 | -0.05706  | 0.928006 |
| AT1G61180 | AT1G61180 | 384.016  | 330.0855 | 323.2012 | 305.5999 | 325.2714 | 352.8816 | 329.9316 | 325.8248 | 270.4201 | 286.9012 | 301.9858 | 319.0592 | -0.08372  | 0.644382 | -0.16426  | 0.35786  | -0.19297  | 0.469409 |
| AT1G61190 | AT1G61190 | 1289.961 | 1188.308 | 1014.672 | 775.3413 | 795.6232 | 957.964  | 1032.481 | 1022.788 | 900.0988 | 964.3333 | 1120.141 | 1045.23  | -0.46274  | 0.001189 | -0.23782  | 0.138842 | -0.15729  | 0.551392 |
| AT1G61200 | AT1G61200 | 0        | 0        | 0        | 0        | 0        | 0        | 0        | 0        | 0        | 0        | 0        | 0        | #N/A      | #N/A     | #N/A      | #N/A     | #N/A      | #N/A     |
| AT1G61210 | AT1G61210 | 412.5497 | 410.3766 | 336.0778 | 249.099  | 226.5638 | 265.1596 | 234.7761 | 217.9358 | 156.1994 | 345.4328 | 363.1812 | 359.4596 | -0.63385  | 0.000165 | -0.90713  | 7.68E-08 | -0.11442  | 0.748152 |
| AT1G61215 | BRD4      | 32.33383 | 29.5341  | 41.20494 | 32.58083 | 35.77323 | 37.87995 | 28.45771 | 29.13003 | 27.33489 | 28.78607 | 18.62468 | 33.14901 | -0.17151  | 0.030847 | -0.46396  | 0.184936 | -0.51183  | 0.313786 |
| AT1G61224 | MIR842A   | 0        | 0        | 0        | 0        | 0.662467 | 0        | 0        | 0        | 0        | 0        | 0        | 0        | 0.128567  | NA       | 0         | NA       | 0         | NA       |
| AT1G61226 | MIR846A   | 1.188904 | 0        | 0        | 0        | 0        | 0        | 0        | 0        | 0        | 0        | 0        | 0        | -0.2184   | NA       | -0.20558  | NA       | -0.19918  | NA       |
| AT1G61230 | AT1G61230 | 2.377808 | 0        | 0        | 0.824831 | 0.662467 | 1.993682 | 0.889303 | 0        | 0        | 0.959536 | 2.660668 | 0        | 0.120718  | 0.871744 | -0.29071  | 0.680284 | 0.120796  | NA       |
| AT1G61240 | AT1G61240 | 160.502  | 196.2671 | 169.9704 | 114.2391 | 93.40789 | 111.6462 | 111.1629 | 106.8101 | 83.95716 | 191.9071 | 192.8984 | 184.3914 | -0.69639  | 9.81E-05 | -0.77454  | 3.26E-05 | 0.118202  | 0.754927 |
| AT1G61250 | SCAMP3    | 715.7202 | 758.3046 | 705.6346 | 1196.83  | 1324.935 | 1236.083 | 1004.913 | 895.4786 | 1207.616 | 544.0567 | 564.0616 | 505.5224 | 0.777541  | 1.83E-09 | -0.379053 | 0.000201 | -0.42779  | 0.018116 |
| AT1G61255 | AT1G61255 | 0        | 0        | 0        | 0        | 2.886909 | 2.649869 | 2.990522 | 0.889303 | 0        | 5.87476  | 0        | 0        | 0.1401703 | 0.093775 | 0.846619  | 0.198319 | 0.281303  | NA       |
| AT1G61260 | AT1G61260 | 36.85602 | 35.68492 | 51.50617 | 125.3743 | 117.9192 | 133.5767 | 102.6699 | 183.4113 | 239.1803 | 27.82653 | 34.58868 | 48.68761 | 1.480448  | 1.1E-06  | 1.931319  | 9.97E-11 | -0.1563   | 0.838515 |
| AT1G61270 | AT1G61270 | 0        | 0        | 0        | 0        | 0        | 0        | 0        | 0        | 0        | 0        | 0        | 0        | 0         | NA       | 0         | NA       | 0         | 0.172362 |
| AT1G61275 | U12       | 0        | 0        | 0        | 0        | 0        | 0        | 0        | 0        | 0        | 0.959536 | 0        | 0        | 0         | NA       | 0         | NA       | 0         | 0.171512 |
| AT1G61280 | AT1G61280 | 9.511232 | 0        | 6.438272 | 10.7228  | 8.612075 | 12.95893 | 8.893035 | 10.7889  | 8.786214 | 15.35257 | 5.321336 | 15.5386  | 0.659006  | 0.247027 | 0.515813  | 0.417048 | 0.829818  | NA       |
| AT1G61290 | SYPI24    | 0        | 0        | 0        | 0        | 1.649662 | 0        | 0        | 1.778607 | 2.15778  | 0.976246 | 0.959536 | 0        | 0.282661  | NA       | 0.717895  | NA       | 0.478961  | NA       |
| AT1G61300 | AT1G61300 | 474.3727 | 499.5889 | 417.2    | 264.3584 | 255.0499 | 325.9669 | 374.3968 | 406.7415 | 282.1351 | 450.0222 | 441.6709 | 439.2244 | -0.70953  | 1.68E-05 | -0.379053 | 0.037066 | -0.060289 | 0.879636 |
| AT1G61310 | AT1G61310 | 224.7028 | 210.541  | 221.4765 | 155.0683 | 133.1559 | 165.4756 | 161.8532 | 166.1491 | 133.7457 | 170.7973 | 188.9074 | 208.2172 | -0.52983  | 0.001741 | -0.50103  | 0.004985 | -0.20885  | 0.498556 |
| AT1G61320 | AT1G61320 | 0        | 0        | 0        | 0        | 0        | 0        | 0.996841 | 0.889303 | 0        | 0.976246 | 0        | 0        | 0.143847  | NA       | 0.320476  | NA       | 0         | NA       |
| AT1G61330 | AT1G61330 | 0        | 0        | 0        | 0        | 0.662467 | 0        | 0.889303 | 0        | 0        | 0        | 0        | 0        | 0.097058  | NA       | 0.130384  | NA       | 0         | NA       |
| AT1G61340 | AT1G61340 | 13.07794 | 21.41095 | 32.19136 | 70.93548 | 65.58426 | 125.6019 | 147.6244 | 119.7568 | 160.1043 | 17.27164 | 15.96401 | 32.1131  | 1.772753  | 1.81E-07 | 2.452244  | 1.43E-13 | -0.0246   | 0.983137 |
| AT1G61350 | AT1G61350 | 216.3805 | 223.0308 | 204.737  | 148.4696 | 151.0425 | 190.3966 | 192.0896 | 190.9635 | 175.7243 | 197.6643 | 202.2108 | 223.7558 | -0.40075  | 0.016444 | -0.19903  | 0.306108 | -0.04291  | 0.917498 |
| AT1G61353 | AT1G61353 | 1.188904 | 0        | 0        | 0        | 0        | 0        | 0        | 0        | 0        | 0        | 0        | 0        | -0.2184   | NA       | -0.20558  | NA       | -0.19918  | NA       |
| AT1G61360 | AT1G61360 | 71.33424 | 71.36984 | 64.38272 | 89.49418 | 117.9192 | 115.6335 | 147.6244 | 171.5435 | 110.3158 | 45.09817 | 59.86503 | 60.08258 | 0.607339  | 0.014234 | 1.012781  | 2.21E-05 | -0.31779  | 0.496345 |
| AT1G61370 | AT1G61370 | 26.15589 | 30.33218 | 23.17778 | 42.89122 | 37.09817 | 51.83572 | 49.80009 | 58.26006 | 35.14486 | 27.82653 | 23.94601 | 22.78994 | 0.675327  | 0.03945  | 0.795843  | 0.018295 | -0.07386  | 0.93307  |
| AT1G61380 | SDI29     | 266.3145 | 312.2431 | 213.7506 | 389.7327 | 392.8431 | 390.7616 | 341.4925 | 308.5625 | 211.8454 | 248.5197 | 240.7904 | 270.3716 | 0.558887  | 0.00444  | 0.124959  | 0.624695 | -0.05204  | 0.916828 |
| AT1G61390 | AT1G61390 | 8.322328 | 3.568492 | 2.575309 | 4.124156 | 4.637271 | 6.977885 | 6.225124 | 6.83112  | 1.952492 | 2.878607 | 0        | 1.035907 | 0.053683  | 0.948636 | 0.131485  | 0.876711 | -0.94066  | NA       |
| AT1G61400 | AT1G61400 | 23.77808 | 32.11643 | 33.47901 | 29.69392 | 27.82363 | 29.90522 | 31.12562 | 32.3667  | 30.26363 | 25.90746 | 18.62468 | 22.78994 | -0.01697  | 0.969007 | 0.076432  | 0.867007 | -0.34993  | 0.574689 |
| AT1G61410 | AT1G61410 | 14.26468 | 23.1952  | 21.89012 | 19.79595 | 29.14856 | 22.92734 | 16.00746 | 17.26224 | 26.35864 | 24.94793 | 13.30334 | 14.50269 | 0.260765  | 0.574947 | 0.206765  | 0.968777 | -0.11191  | 0.910917 |
| AT1G61415 | AT1G61415 | 1.188904 | 1.784246 | 2.575309 | 3.299325 | 5.299738 | 0.996841 | 4.466517 | 0        | 1.952492 | 0.959536 | 1.330334 | 2.071813 | 0.457993  | 0.535126 | 0.111645  | 0.899421 | -0.14912  | NA       |
| AT1G61420 | AT1G61420 | 32.10041 | 37.46917 | 47.64321 | 87.4321  | 76.8462  | 86.72515 | 80.92662 | 84.15342 | 39.04984 | 19.19071 | 22.61568 | 21.75404 | 1.035294  | 0.000652 | 0.1747859 | 0.023708 | -0.80175  | 0.106611 |
| AT1G61430 | AT1G61430 | 107.0014 | 121.3287 | 105.5877 | 168.2656 | 176.8788 | 200.365  | 223.2152 | 184.4902 | 139.6032 | 104.5894 | 109.0874 | 84.94434 | 0.687275  | 0.001157 | 0.699004  | 0.001314 | -0.15379  | 0.740168 |
| AT1G61440 | AT1G61440 | 3.566712 | 1.784246 | 1.287654 | 4.248311 | 9.937009 | 10.96525 | 12.45025 | 9.710009 | 5.857476 | 0.959536 | 1.330334 | 2.071813 | 1.414041  | 0.014347 | 1.363575  | 0.024293 | -0.32598  | NA       |
| AT1G61450 | AT1G61450 | 16.64466 | 26.76369 | 11.58889 | 35.88015 | 39.08557 | 21.9035  | 28.45771 | 15.10446 | 31.23987 | 27.82653 | 21.28534 | 16.5745  | 0.780811  | 0.058102 | 0.427512  | 0.378291 | 0.257556  | 0.76672  |
| AT1G61460 | AT1G61460 | 13.07794 | 39.25341 | 21.89012 | 61.86234 | 62.93439 | 53.8294  | 65.80846 | 66.89118 | 47.83605 | 17.27164 | 38.57969 | 20.71813 | 1.215608  | 0.003888 | 1.221357  | 0.000518 | 0.054024  | 0.957395 |
| AT1G61470 | CAF1-5    | 14.26685 | 18.49472 | 15.45185 | 41.65397 | 51.67245 | 101.6778 | 96.93408 | 78.75897 | 116.1733 | 13.4335  | 19.95501 | 21.75404 | 1.901989  | 2.93E-07 | 2.471791  | 1.13E-11 | 0.280201  | 0.744238 |
| AT1G61475 | AT1G61475 | 1.188904 | 0        | 1.287654 | 0.662467 | 1.993682 | 0.889303 | 4.31556  | 0        | 0.959536 | 2.660668 | 0        | 0        | 0.142863  | 0.855566 | 0.309828  | 0.686335 | 0.094626  | NA       |
| AT1G61480 | AT1G61480 | 1.188904 | 0        | 0        | 3.71174  | 4.637271 | 0.996841 | 4.466517 | 3.23667  | 2.928738 | 2.878607 | 0        | 1.035907 | 0.99412   | 0.131936 | 1.045479  | 1.126376 | 0.356488  | NA       |
| AT1G61490 | AT1G61490 | 40.42273 | 44.60615 | 32.19136 | 65.16166 | 56.30972 | 83.73463 | 88.04104 | 76.60119 | 56.62227 | 27.82653 | 37.24935 | 41.43626 | 0.758539  | 0.009661 | 0.876024  | 0.003345 | -0.12716  | 0.860356 |
| AT1G61500 | AT1G61500 | 128.4016 | 155.2294 | 133.9161 | 70.93548 | 64.25933 | 77.75358 | 96.04478 | 67.97007 | 58.57476 | 199.5834 | 200.8804 | 156.4219 | -0.93899  | 1.17E-05 | -0.86241  | 0.000123 | 0.410564  | 0.215996 |
| AT1G61510 | AT1G61510 | 0        | 0        | 0        | 0        | 0        | 0        | 1.07889  | 0        | 0        | 0        | 0        | 0        | 0.16673   | NA       | 0         | NA       | 0         | NA       |
| AT1G61520 | LHCA3     | 471.6501 | 558.997  | 5042.197 | 23741.53 | 21701.1  | 22186.69 | 19768.33 | 22203.55 | 25114.9  | 52665.07 | 55911.28 | 48223.52 | -1.16719  | 9.68E-24 | -1.17874  | 3.12E-24 | 0.033415  | 0.914481 |
| AT1G61540 | AT1G61540 | 0        | 0        | 0        | 0        | 0        | 0        | 0        | 0        | 0        | 0        | 0        | 0        | #N/A      | #N/A     | #N/A      | #N/A     | #N/A      | #N/A     |
| AT1G61542 | AT1G61542 | 0        | 0        | 0        | 0        | 0        | 0        | 0        | 0        | 0        | 0        | 0        | 0        | #N/A      | #N/A     | #N/A      | #N/A     | #N/A      | #N/A     |
| AT1G61550 | AT1G61550 | 1.188904 | 1.784246 | 3.862963 | 7.011065 | 1.987402 | 4.984204 | 8.003731 | 2.15778  | 3.904984 | 0        | 1.330334 | 0        | 0.644105  | 0.357544 | 0.620411  | 0.404461 | -0.75128  | NA       |
| AT1G61560 | MLO6      | 20.21137 | 35.68492 | 25.75309 | 61.86234 | 102.02   | 68.78201 | 127.1704 | 110.0468 | 106.4108 | 37.42189 | 49.22236 | 29.00538 | 1.426169  | 1.71E-06 | 1.967491  | 1.46E-11 | 0.463071  | 0.407382 |
| AT1G61563 | RALF18    | 0        | 1.784246 | 0        | 0        | 0        | 0        | 0        | 0        | 0        | 0        | 0        | 3.991002 | -0.27045  | NA       | -0.24255  | NA       | 0.270186  | NA       |
| AT1G61566 | RALF19    | 1.188904 | 3.568492 | 0        | 0        | 0        | 0        | 0        | 0        | 0.959536 | 1.330334 | 2.071813 | 0        | -0.85121  | NA       | -0.76234  | NA       | 0.040106  | NA       |
| AT1G61570 | TIM13     | 93.92341 | 76.72258 | 92.71111 | 189.7112 | 215.3019 | 120.6177 | 117.3881 | 77.68008 | 242.109  | 96.9131  | 130.3727 | 116.0215 | 0.917835  | 0.006918 | 0.667255  | 0.069123 | 0.341931  | 0.591221 |
| AT1G61575 | AT1G61575 | 3.566712 | 5.352738 | 3.862963 | 1.237247 | 0.662467 | 0.996841 | 1.778607 | 0        | 0        | 2.878607 | 2.660668 | 3.10772  | -1.22854  | 0.094757 | -1.22854  | 0.067558 | -0.3113   | NA       |
| AT1G61580 | ARP2      | 127.2127 | 144.5239 | 142.9296 | 160.8421 | 183.5034 | 167.4693 | 136.0634 | 173.7013 | 209.8929 | 144.8899 | 126.3817 | 160.5655 | 0.297974  | 0.167618 | 0.318902  | 0.162262 | 0.06484   | 0.894522 |
| AT1G61590 | AT1G61590 | 1.188904 | 0        |          |          |          |          |          |          |          |          |          |          |           |          |           |          |           |          |



|           |           |          |           |          |          |          |          |          |          |          |          |          |          |          |          |          |          |           |          |    |
|-----------|-----------|----------|-----------|----------|----------|----------|----------|----------|----------|----------|----------|----------|----------|----------|----------|----------|----------|-----------|----------|----|
| AT1G62035 | MIR171C   | 1.188904 | 1.784246  | 1.287654 | 0.824831 | 1.324935 | 1.993682 | 2.66791  | 2.15778  | 0.976246 | 0        | 0        | 0        | -0.01083 | 0.990242 | 0.252063 | 0.755986 | -0.73271  | NA       |    |
| AT1G62040 | ATG8C     | 234.2141 | 267.6369  | 276.8457 | 324.1586 | 337.1958 | 243.2291 | 305.0311 | 256.7758 | 390.4984 | 194.7857 | 139.6851 | 318.0233 | 0.210213 | 0.49881  | 0.2784   | 0.377287 | -0.23738  | 0.641615 |    |
| AT1G62045 | AT1G62045 | 9.511232 | 17.136984 | 15.45185 | 5.773818 | 13.24935 | 8.971567 | 12.45025 | 13.96674 | 6.762885 | 18.62468 | 16.5745  | 0.04185  | 0.953186 | 0.04185  | 0.953186 | 0.303421 | NA        | NA       |    |
| AT1G62050 | AT1G62050 | 109.3792 | 123.113   | 119.7519 | 63.09958 | 59.62205 | 78.75042 | 79.14801 | 98.17898 | 70.28971 | 114.1847 | 160.9704 | 90.12387 | -0.7835  | 0.001285 | -0.48768 | 0.069101 | 0.043932  | 0.945973 |    |
| AT1G62055 | AT1G62055 | 0        | 0         | 0        | 0        | 0        | 0        | 0.889303 | 0        | 0        | 0        | 0        | 0        | 0        | NA       | 0.160764 | NA       | 0         | NA       |    |
| AT1G62060 | AT1G62060 | 0        | 0         | 0        | 0        | 0        | 0        | 0        | 1.07889  | 0        | 0        | 1.330334 | 1.035907 | 0        | NA       | 0.179864 | NA       | 0.38345   | NA       |    |
| AT1G62070 | AT1G62070 | 0        | 0         | 0        | 0.662467 | 0        | 0        | 0        | 0        | 0        | 0        | 0        | 0        | 0.128567 | NA       | 0        | NA       | 0         | NA       |    |
| AT1G62075 | AT1G62075 | 0        | 0         | 0        | 0        | 0        | 0        | 0        | 0        | 0        | 0        | 0        | 0        | #N/A     | #N/A     | #N/A     | #N/A     | #N/A      | #N/A     |    |
| AT1G62080 | AT1G62080 | 0        | 0         | 0        | 0        | 0        | 0        | 0        | 0        | 0        | 0        | 0        | 0        | #N/A     | #N/A     | #N/A     | #N/A     | #N/A      | #N/A     |    |
| AT1G62085 | AT1G62085 | 80.84547 | 80.29107  | 68.24568 | 44.9533  | 47.69764 | 44.85784 | 39.12935 | 43.1556  | 51.74104 | 64.28889 | 71.83803 | 56.97486 | -0.70744 | 0.002854 | -0.74257 | 0.003331 | -0.24213  | 0.591092 |    |
| AT1G62090 | AT1G62090 | 1.188904 | 1.784246  | 1.287654 | 0.412416 | 0.662467 | 0        | 1.778607 | 0        | 0        | 0        | 1.330334 | 0        | -0.49326 | NA       | -0.32878 | NA       | -0.45473  | NA       |    |
| AT1G62095 | AT1G62095 | 0        | 0         | 0        | 0        | 0        | 0        | 0.889303 | 0        | 0        | 0.995936 | 0        | 0        | 0        | NA       | 0.13694  | NA       | 0.147196  | NA       |    |
| AT1G62110 | AT1G62110 | 61.82301 | 60.66437  | 47.64321 | 42.06639 | 60.94699 | 41.86731 | 48.02239 | 45.31338 | 32.21612 | 57.57214 | 47.89202 | 68.36983 | -0.21545 | 0.513381 | -0.4089  | 0.217021 | 0.041291  | 0.957372 |    |
| AT1G62120 | AT1G62120 | 34.47821 | 39.25341  | 41.20494 | 29.28151 | 25.83622 | 30.90206 | 44.46517 | 42.07671 | 33.19236 | 40.3005  | 62.5257  | 42.47217 | -0.3955  | 0.23012  | 0.060936 | 0.887113 | 0.306133  | 0.582115 |    |
| AT1G62130 | AT1G62130 | 124.8349 | 124.8972  | 118.4642 | 71.76031 | 62.27192 | 68.78201 | 120.0556 | 113.2834 | 47.83605 | 177.5141 | 154.3187 | 152.2783 | -0.8146  | 0.002909 | -0.36819 | 0.24234  | 0.379402  | 0.406255 |    |
| AT1G62150 | AT1G62150 | 48.74506 | 64.23286  | 37.34198 | 38.35465 | 43.72284 | 39.87363 | 39.12935 | 43.1556  | 50.76479 | 67.16749 | 33.25835 | 52.83123 | -0.26693 | 0.441381 | -0.14693 | 0.715654 | 0.065389  | 0.93291  |    |
| AT1G62160 | AT1G62160 | 0        | 1.784246  | 0        | 0        | 0        | 0        | 0        | 0        | 0        | 0        | 0        | 0        | -0.2184  | NA       | -0.20558 | NA       | -0.19918  | NA       |    |
| AT1G62170 | AT1G62170 | 1.188904 | 0         | 0        | 0.412416 | 0        | 0        | 1.778607 | 0        | 0        | 0        | 0        | 0        | -0.13507 | NA       | 0.094888 | NA       | -0.20373  | NA       |    |
| AT1G62180 | APR2      | 1451.652 | 1450.592  | 1431.872 | 553.4617 | 499.5003 | 635.9844 | 278.352  | 268.6436 | 312.3987 | 1216.691 | 1157.391 | 1370.504 | -1.34817 | 5.95629  | -2.30417 | 8.88676  | -0.20772  | 0.325117 |    |
| AT1G62181 | AT1G62181 | 0        | 0         | 1.287654 | 0        | 0.662467 | 0        | 0.662467 | 0        | 0.889303 | 0        | 0        | 0.889303 | 0        | -0.10061 | NA       | -0.05393 | NA        | -0.21477 | NA |
| AT1G62190 | FAD41     | 0        | 1.784246  | 0        | 1.237247 | 0        | 0        | 0.889303 | 0        | 0        | 0.995936 | 1.330334 | 0        | -0.01905 | NA       | -0.10555 | NA       | 0.10525   | NA       |    |
| AT1G62200 | NPF8.5    | 271.0701 | 353.2807  | 354.1049 | 278.3805 | 282.8735 | 315.9985 | 389.5149 | 370.0592 | 310.4462 | 247.5602 | 255.4241 | 310.772  | -0.15377 | 0.436512 | 0.131796 | 0.534645 | -0.25508  | 0.379474 |    |
| AT1G62210 | AT1G62210 | 0        | 0         | 0        | 0        | 0        | 0        | 0        | 0        | 0.976246 | 0        | 0        | 0        | 0        | NA       | 0.14724  | NA       | 0.156349  | NA       |    |
| AT1G62214 | AT1G62214 | 0        | 0         | 0        | 0        | 0        | 0        | 0.889303 | 0        | 0        | 0        | 0        | 0        | 0        | NA       | 0.160764 | NA       | 0         | NA       |    |
| AT1G62220 | AT1G62220 | 0        | 0         | 0        | 0        | 0.662467 | 0        | 0        | 0        | 0        | 0        | 0        | 0        | 0.128567 | NA       | 0        | NA       | 0         | NA       |    |
| AT1G62225 | AT1G62225 | 0        | 0         | 1.287654 | 7.011065 | 6.242673 | 7.974726 | 2.66791  | 2.15778  | 5.857476 | 0        | 0        | 0        | 1.883397 | 0.002008 | 1.093183 | 0.107593 | -0.33086  | NA       |    |
| AT1G62230 | AT1G62230 | 0        | 0         | 0        | 0        | 0        | 0        | 0.976246 | 0        | 0        | 0        | 0        | 2.071813 | 0        | NA       | 0.14122  | NA       | 0.2956    | NA       |    |
| AT1G62240 | AT1G62240 | 1.188904 | 0         | 2.575309 | 1.649662 | 1.987402 | 1.993682 | 0.889303 | 2.15778  | 0.972246 | 1.919071 | 1.330334 | 1.035907 | 0.221084 | 0.781804 | -0.02091 | 0.980922 | 0.035622  | NA       |    |
| AT1G62250 | AT1G62250 | 324.5708 | 476.3937  | 489.3086 | 321.2717 | 298.1103 | 271.1407 | 353.0535 | 250.3025 | 290.9213 | 626.5768 | 623.9266 | 528.3123 | -0.51467 | 0.0082   | -0.50967 | 0.011427 | 0.455991  | 0.093381 |    |
| AT1G62260 | PCMP-E10  | 36.85602 | 39.25341  | 38.62963 | 30.51875 | 21.86142 | 33.89259 | 41.79726 | 47.47116 | 34.16861 | 25.90746 | 34.58868 | 34.18492 | -0.39222 | 0.24313  | 0.101265 | 0.810682 | -0.26415  | 0.668408 |    |
| AT1G62262 | SLAH4     | 0        | 0         | 0        | 6.186234 | 6.242673 | 3.987363 | 7.114428 | 9.710009 | 1.952492 | 0        | 1.330334 | 0        | 1.747731 | 0.004491 | 1.803615 | 0.003938 | 0.091156  | NA       |    |
| AT1G62270 | AT1G62270 | 0        | 0         | 0        | 0.662467 | 0        | 0        | 0.889303 | 0        | 0        | 0        | 0        | 0        | 0.097058 | NA       | 0.130384 | NA       | 0         | NA       |    |
| AT1G62280 | SLAH1     | 3.566712 | 0         | 0        | 0        | 0        | 0        | 0        | 0        | 0        | 0        | 0        | 0        | -0.5299  | NA       | -0.50432 | NA       | -0.32773  | NA       |    |
| AT1G62290 | AP2A      | 38.04493 | 41.03766  | 56.65679 | 9.485558 | 9.274542 | 8.971567 | 20.45398 | 14.02557 | 21.47741 | 59.49121 | 55.87403 | 38.32854 | -2.07149 | 5.43610  | -1.17153 | 0.000652 | 0.170146  | 0.804253 |    |
| AT1G62300 | WRK6V     | 39.23383 | 35.68492  | 39.91728 | 200.8464 | 149.7176 | 230.2702 | 309.4776 | 317.1936 | 177.6768 | 33.58375 | 54.54369 | 27.96948 | 2.177914 | 9.96615  | 2.628558 | 4.08E-21 | -0.01992  | 0.983741 |    |
| AT1G62301 | AT1G62301 | 0        | 0         | 0        | 0        | 0        | 0        | 1.07889  | 0        | 0        | 0        | 0        | 0        | 0        | NA       | 0.16673  | NA       | 0         | NA       |    |
| AT1G62305 | AT1G62305 | 41.61164 | 51.74313  | 45.0679  | 69.28582 | 70.884   | 51.83572 | 80.92662 | 65.81229 | 67.36097 | 47.97678 | 42.57069 | 49.72351 | 0.481173 | 0.073241 | 0.617388 | 0.024196 | 0.034798  | 0.962641 |    |
| AT1G62310 | AT1G62310 | 357.8601 | 421.0821  | 30.2242  | 216.1058 | 142.4305 | 308.0238 | 435.7587 | 510.3149 | 254.8002 | 377.0975 | 388.4575 | 355.3159 | -0.72602 | 0.008612 | 0.085776 | 0.819813 | -0.00865  | 0.990956 |    |
| AT1G62320 | AT1G62320 | 1.188904 | 0         | 1.287654 | 1.237247 | 3.312336 | 3.987363 | 3.552714 | 1.07889  | 1.954492 | 1.919071 | 0        | 1.035907 | 0.603398 | 0.330409 | 0.500338 | 0.508744 | -0.093549 | NA       |    |
| AT1G62330 | AT1G62330 | 304.3594 | 264.0684  | 245.942  | 196.7222 | 164.2919 | 208.3397 | 184.0858 | 227.6458 | 150.3419 | 295.537  | 268.7275 | 220.6481 | -0.50725 | 0.01109  | -0.52502 | 0.011289 | -0.05317  | 0.913172 |    |
| AT1G62333 | AT1G62333 | 1.188904 | 0         | 0        | 0.662467 | 0        | 0        | 1.07889  | 0        | 0        | 0        | 1.330334 | 0        | -0.1144  | NA       | -0.03819 | NA       | -0.00924  | NA       |    |
| AT1G62340 | SBT2.4    | 0        | 0         | 0        | 0.662467 | 0        | 0        | 0        | 0        | 0        | 0        | 0        | 0        | 0.128567 | NA       | 0        | NA       | 0         | NA       |    |
| AT1G62350 | AT1G62350 | 21.40027 | 8.92123   | 19.31482 | 20.20836 | 17.88662 | 17.94313 | 21.34328 | 17.26224 | 21.47741 | 9.595356 | 13.30334 | 24.86176 | 0.121691 | 0.820094 | 0.205765 | 0.707608 | -0.08618  | 0.937239 |    |
| AT1G62355 | MIR413    | 0        | 1.784246  | 7.725926 | 7.42348  | 2.649869 | 5.981045 | 4.446517 | 7.55223  | 1.952492 | 2.878607 | 2.660668 | 2.154539 | 0.456468 | 0.525206 | 0.29462  | 0.716299 | 0.159117  | NA       |    |
| AT1G62360 | STM       | 131.9683 | 94.56504  | 101.7247 | 82.0707  | 47.03518 | 55.82308 | 60.47264 | 59.33895 | 80.07359 | 118.0229 | 109.0874 | 91.15977 | -0.77546 | 0.004165 | -1.0071  | 0.000282 | -0.04893  | 0.945273 |    |
| AT1G62370 | AT1G62370 | 5.94452  | 8.92123   | 5.15617  | 23.9201  | 21.19895 | 15.94945 | 16.89672 | 10.7889  | 21.47741 | 9.595356 | 11.97301 | 6.215439 | 1.376769 | 0.002765 | 1.070534 | 0.034286 | 0.349677  | NA       |    |
| AT1G62380 | AC02      | 3928.139 | 4128.745  | 4027.783 | 2702.559 | 2625.358 | 2591.786 | 2129.882 | 2019.682 | 2174.1   | 3636.64  | 3218.078 | 4041.071 | -0.60443 | 3.97E-09 | -0.92669 | 4.22E-20 | -0.14734  | 0.428894 |    |
| AT1G62390 | Phox2     | 1676.355 | 1261.467  | 1178.204 | 757.6074 | 862.5324 | 806.4442 | 848.3955 | 959.1332 | 1086.562 | 1102.506 | 1237.211 | 1166.431 | -0.75134 | 1.2E-06  | -0.50117 | 0.00217  | -0.22936  | 0.400674 |    |
| AT1G62400 | HT1       | 23.77808 | 24.97944  | 30.9037  | 14.69662 | 15.89921 | 10.96525 | 17.78607 | 22.65669 | 14.64369 | 19.19071 | 21.28534 | 24.86176 | -0.76311 | 0.042799 | -0.48892 | 0.252863 | -0.26115  | 0.727878 |    |
| AT1G62410 | AT1G62410 | 0        | 0         | 0        | 0        | 0        | 0        | 0.889303 | 0        | 0        | 0        | 1.330334 | 0        | 0        | NA       | 0.141773 | NA       | 0.183636  | NA       |    |
| AT1G62420 | AT1G62420 | 0        | 0         | 0        | 4.124156 | 3.312336 | 3.987363 | 1.778607 | 3.23667  | 0.976246 | 0        | 0        | 1.035907 | 1.496784 | 0.014752 | 0.868986 | 0.199298 | 0.124924  | NA       |    |
| AT1G62421 | AT1G62421 | 0        | 0         | 0        | 0        | 0        | 0        | 0        | 0        | 0        | 0        | 0        | 0        | #N/A     | #N/A     | #N/A     | #N/A     | #N/A      | #N/A     |    |
| AT1G62422 | AT1G62422 | 51.12287 | 67.80135  | 39.91728 | 115.0639 | 131.1685 | 103.6714 | 168.9677 | 104.6523 | 229.4178 | 45.09817 | 61.19536 | 46.61579 | 1.086617 | 0.000192 | 1.583974 | 2.27E-08 | -0.04712  | 0.955937 |    |
| AT1G62430 | CD51      | 628.9302 | 610.2121  | 596.184  | 397.1562 | 459.7523 | 455.5562 | 626.959  | 571.8117 | 509.6004 | 596.8312 | 613.284  | 581.1436 | -0.48331 | 0.000128 | -0.10179 | 0.526064 | -0.03558  | 0.910917 |    |
| AT1G62440 | LRX2      | 15.45575 | 7.136984  | 11.58889 | 0.412416 | 0.662467 | 1.993682 | 3.557214 | 1.07889  | 0.976246 | 3.838143 | 9.312338 | 5.179533 | -2.33496 | 0.000045 | -1.76737 | 0.003173 | -0.75147  | NA       |    |
| AT1G62450 | AT1G62450 | 1.188904 | 0         | 0        | 0        | 0        | 0        | 0        | 0        | 0        | 0        | 0        | 0        | -0.2184  | NA       | -0.20558 | NA       | -0.19918  | NA       |    |
| AT1G62460 | AT1G62460 | 0        | 1.784246  | 0        | 0        | 0.662467 | 0        | 0        | 0        | 0        | 0        | 0        | 3.10772  | -0.14686 | NA       | -0.24299 | NA       | 0.212226  | NA       |    |
| AT1G62480 | AT1G62480 | 1458.785 | 1118.722  | 1510     |          |          |          |          |          |          |          |          |          |          |          |          |          |           |          |    |

|           |           |          |          |          |          |          |          |          |          |          |          |          |           |          |          |           |          |          |          |
|-----------|-----------|----------|----------|----------|----------|----------|----------|----------|----------|----------|----------|----------|-----------|----------|----------|-----------|----------|----------|----------|
| AT1G62910 | AT1G62910 | 57.06739 | 64.23286 | 59.2321  | 48.25262 | 41.07297 | 36.88311 | 49.80099 | 64.7334  | 20.50117 | 58.53167 | 69.17737 | 53.86714  | -0.46338 | 0.183281 | -0.38885  | 0.307599 | 0.007921 | 0.992945 |
| AT1G62914 | AT1G62914 | 83.22328 | 89.2123  | 83.69753 | 48.25262 | 39.08557 | 60.80729 | 77.3694  | 93.86342 | 33.19236 | 84.43914 | 78.4897  | 68.36983  | -0.74698 | 0.018363 | -0.30417  | 0.41717  | -0.13464 | 0.850178 |
| AT1G62920 | AT1G62920 | 27.34479 | 28.54794 | 28.3284  | 30.10634 | 35.11077 | 34.88943 | 38.24000 | 21.5778  | 22.45366 | 47.97678 | 14.63367 | 26.93357  | 0.220355 | 0.629579 | -0.02118  | 0.969539 | 0.106942 | 0.90941  |
| AT1G62930 | AT1G62930 | 85.60108 | 60.66437 | 87.5605  | 69.69823 | 51.00998 | 68.78201 | 54.24751 | 76.60119 | 54.66978 | 91.15588 | 93.12338 | 93.23159  | -0.30734 | 0.252309 | -0.34315  | 0.231181 | 0.221689 | 0.633145 |
| AT1G62935 | AT1G62935 | 0        | 1.784246 | 1.287654 | 0        | 1.987402 | 0        | 1.778607 | 0        | 2.928738 | 0.995936 | 1.330334 | 2.071813  | -0.17926 | 0.812618 | 0.24633   | 0.750873 | 0.188386 | NA       |
| AT1G62940 | CLL1      | 10.70014 | 26.76369 | 24.46543 | 0.824831 | 1.987402 | 1.993682 | 2.66791  | 4.31556  | 0.928738 | 28.78607 | 23.94601 | 27.96948  | -2.78113 | 8.82E-09 | -2.05592  | 3.26E-05 | 0.402688 | NA       |
| AT1G62950 | AT1G62950 | 72.52314 | 55.31163 | 73.3963  | 42.4788  | 50.34751 | 53.8294  | 51.5796  | 52.86561 | 31.23987 | 76.76285 | 59.86503 | 94.76749  | -0.46021 | 0.112963 | -0.55042  | 0.071819 | 0.186858 | 0.739252 |
| AT1G62960 | ACS10     | 584.9407 | 62.62704 | 571.7185 | 385.1961 | 361.7071 | 332.9448 | 303.2525 | 286.9847 | 194.273  | 541.1781 | 536.1246 | 570.2845  | -1.70569 | 8.72E-06 | -1.16032  | 1.88E-13 | -0.10958 | 0.746278 |
| AT1G62970 | AT1G62970 | 107.0014 | 87.42806 | 73.3963  | 63.92441 | 47.03518 | 59.81045 | 62.25124 | 75.5223  | 49.78855 | 72.92471 | 69.17737 | 60.08258  | -0.62155 | 0.013959 | -0.49941  | 0.069871 | -0.39208 | 0.348362 |
| AT1G62975 | BHLH125   | 9.511232 | 14.27397 | 12.87654 | 21.03319 | 22.52389 | 26.9147  | 27.56841 | 16.18335 | 17.57243 | 41.26003 | 34.58868 | 33.14901  | 0.813267 | 0.042606 | 0.660946  | 0.138025 | 1.419277 | 0.002443 |
| AT1G62978 | AT1G62978 | 0        | 0        | 0        | 0        | 0        | 0        | 0        | 0        | 0        | 0        | 0        | 0         | #N/A     | #N/A     | #N/A      | #N/A     | #N/A     | #N/A     |
| AT1G62980 | EXPA18    | 0        | 0        | 0        | 0        | 0        | 0        | 0        | 0        | 0.976246 | 0.995936 | 0        | 0         | 0        | NA       | 0.146371  | NA       | 0.148275 | NA       |
| AT1G62981 | AT1G62981 | 11.88904 | 7.136984 | 5.150617 | 3.71174  | 7.28714  | 1.993682 | 0.889303 | 3.23667  | 1.952492 | 6.716749 | 11.97301 | 6.215439  | -0.63592 | 0.311143 | -1.29164  | 0.038178 | 0.012257 | NA       |
| AT1G62990 | KNAT7     | 15.45575 | 32.11643 | 23.17778 | 28.04426 | 21.19895 | 20.93366 | 23.12189 | 28.05114 | 13.66744 | 34.54328 | 35.91902 | 25.89766  | 0.041677 | 0.935447 | -0.08522  | 0.874531 | 0.434813 | 0.5164   |
| AT1G63000 | NRS/ER    | 515.9843 | 426.4348 | 436.5148 | 381.4844 | 406.0924 | 383.7837 | 378.8433 | 332.2981 | 422.7145 | 426.0338 | 388.4575 | 491.0197  | -0.23529 | 0.14999  | -0.28024  | 0.069737 | -0.07877 | 0.815524 |
| AT1G63005 | MIR399B   | 0        | 0        | 0        | 0        | 0        | 0        | 0        | 0        | 0        | 0        | 0        | 0         | #N/A     | #N/A     | #N/A      | #N/A     | #N/A     | #N/A     |
| AT1G63010 | AT1G63010 | 569.485  | 594.1539 | 468.7062 | 507.6836 | 465.052  | 529.3225 | 613.6194 | 625.7562 | 477.3843 | 458.658  | 449.6529 | 597.7181  | -0.11663 | 0.571816 | 0.073156  | 0.752908 | -0.11075 | 0.759637 |
| AT1G63020 | NRPD1     | 85.60108 | 41.03766 | 64.38272 | 30.51875 | 22.52389 | 23.92418 | 33.79933 | 33.44559 | 15.61994 | 57.57214 | 55.87403 | 55.93895  | -1.22079 | 0.000106 | -1.13461  | 0.000619 | -0.18106 | 0.788881 |
| AT1G63030 | DREB1E    | 0        | 0        | 0        | 0        | 0        | 0        | 2.66791  | 0        | 0.976246 | 0        | 0        | 0         | 0        | NA       | 0.569249  | NA       | 0        | NA       |
| AT1G63040 | AT1G63040 | 0        | 0        | 0        | 0        | 0        | 0        | 0        | 0        | 0        | 2.660668 | 0        | 0         | 0        | NA       | 0         | NA       | 0.322821 | NA       |
| AT1G63050 | LPLA72    | 108.1903 | 98.13353 | 99.14938 | 108.0529 | 116.5942 | 97.6904  | 123.6132 | 107.889  | 95.67211 | 91.15588 | 63.85603 | 117.0574  | 0.076643 | 0.793657 | 0.094847  | 0.761897 | -0.15149 | 0.757199 |
| AT1G63055 | AT1G63055 | 0        | 0        | 2.575309 | 1.237247 | 0        | 0        | 0.889303 | 0        | 1.952492 | 0.995936 | 0        | 0.1035907 | -0.20083 | NA       | 0.036364  | NA       | -0.07966 | NA       |
| AT1G63057 | AT1G63057 | 0        | 1.784246 | 1.287654 | 0        | 0        | 0        | 0.889303 | 0        | 0        | 0        | 0        | 0         | -0.52682 | NA       | -0.29362  | NA       | -0.48177 | NA       |
| AT1G63060 | AT1G63060 | 0        | 0        | 0        | 0        | 0        | 0        | 0        | 0        | 0        | 0        | 0        | 0         | #N/A     | #N/A     | #N/A      | #N/A     | #N/A     | #N/A     |
| AT1G63070 | AT1G63070 | 14.26685 | 10.70548 | 9.01358  | 6.186234 | 6.624673 | 5.981045 | 6.225124 | 7.55223  | 3.904984 | 13.4335  | 10.64267 | 16.5745   | -0.70746 | 0.174255 | -0.76258  | 0.176216 | 0.232089 | NA       |
| AT1G63080 | AT1G63080 | 49.93397 | 69.5856  | 55.36914 | 30.10634 | 32.4609  | 32.89575 | 39.12935 | 24.81447 | 36.1211  | 51.81492 | 67.84703 | 55.93895  | -0.81986 | 0.002809 | -0.73411  | 0.013119 | 0.015106 | 0.985214 |
| AT1G63090 | PP2A1     | 438.7056 | 409.643  | 395.3099 | 391.3824 | 425.304  | 472.2505 | 560.2612 | 479.0271 | 526.1966 | 465.3748 | 509.5179 | 559.3895  | -0.02177 | 0.991399 | 0.285646  | 0.064107 | 0.255236 | 0.258811 |
| AT1G63100 | SLC28     | 148.613  | 110.6233 | 139.0667 | 152.5938 | 131.831  | 160.4914 | 135.1741 | 162.9124 | 129.8407 | 141.0517 | 126.3817 | 185.4273  | 0.141546 | 0.566835 | 0.086743  | 0.760169 | 0.17362  | 0.675182 |
| AT1G63105 | AT1G63105 | 0        | 0        | 1.287654 | 0        | 0        | 0        | 0        | 0        | 0        | 0        | 0        | 0         | -0.2184  | NA       | -0.20558  | NA       | -0.19198 | NA       |
| AT1G63110 | AT1G63110 | 408.983  | 372.9074 | 450.679  | 332.8194 | 345.1454 | 389.7647 | 384.1791 | 372.217  | 297.755  | 381.8952 | 332.5835 | 374.9982  | -0.21215 | 0.206017 | -0.22521  | 0.202392 | -0.17602 | 0.533102 |
| AT1G63120 | ATRB12    | 200.9248 | 208.7568 | 198.2988 | 195.0726 | 170.9166 | 187.4061 | 183.1965 | 199.5946 | 168.8906 | 211.0978 | 212.8534 | 188.353   | -0.12905 | 0.480757 | -0.13725  | 0.484917 | 0.011296 | 0.981804 |
| AT1G63130 | AT1G63130 | 162.8798 | 123.113  | 151.9432 | 108.8777 | 104.0074 | 101.6778 | 135.1741 | 126.2301 | 106.4180 | 155.4448 | 162.3007 | 184.3914  | -0.47427 | 0.012366 | -0.25661  | 0.239311 | 0.181786 | 0.602936 |
| AT1G63140 | AT1G63140 | 5.94452  | 1.784246 | 1.510617 | 0.824831 | 2.649896 | 0        | 3.57214  | 1.07889  | 0.976246 | 3.838143 | 5.321336 | 3.10772   | -1.02481 | 0.121112 | -0.68265  | 0.352746 | -0.07448 | NA       |
| AT1G63150 | AT1G63150 | 33.28931 | 53.52738 | 45.0679  | 34.64291 | 35.77323 | 38.87679 | 44.46517 | 34.52448 | 23.4299  | 44.13864 | 49.22236 | 49.72351  | -0.24249 | 0.486984 | -0.31468  | 0.392746 | 0.130127 | 0.850918 |
| AT1G63160 | RF2       | 93.92341 | 57.09587 | 65.67037 | 94.85558 | 96.72022 | 84.73147 | 72.03358 | 66.89118 | 69.31347 | 80.60099 | 62.5257  | 66.29802  | 0.32477  | 0.195683 | -0.07521  | 0.821601 | -0.06068 | 0.920201 |
| AT1G63170 | AT1G63170 | 395.905  | 469.2567 | 453.2543 | 371.5864 | 368.9943 | 383.7837 | 345.0498 | 368.9804 | 431.5007 | 410.6812 | 440.3405 | 418.31562 | -0.22411 | 0.124667 | -0.19682  | 0.123497 | -0.0512  | 0.874756 |
| AT1G63180 | UGE3      | 66.57862 | 60.66437 | 66.95803 | 70.11065 | 78.17114 | 92.70619 | 144.9565 | 116.5201 | 133.7457 | 94.99403 | 79.82004 | 93.23509  | 0.271015 | 0.274855 | 0.989739  | 3.94E-06 | 0.446921 | 0.203688 |
| AT1G63190 | AT1G63190 | 0        | 0        | 0        | 0        | 0        | 0        | 0        | 0        | 0        | 0        | 0        | 1.035907  | 0        | NA       | 0         | NA       | 0.172362 | NA       |
| AT1G63200 | AT1G63200 | 0        | 0        | 0        | 0        | 0        | 0        | 0        | 0        | 0        | 0        | 0        | 0         | #N/A     | #N/A     | #N/A      | #N/A     | #N/A     | #N/A     |
| AT1G63205 | AT1G63205 | 0        | 0        | 0        | 0        | 0        | 0        | 0.889303 | 0        | 0        | 0        | 0        | 0         | 0        | NA       | 0.160764  | NA       | 0        | NA       |
| AT1G63206 | AT1G63206 | 0        | 0        | 0        | 0        | 0        | 0        | 0        | 0        | 0.976246 | 0.995936 | 0        | 0         | 0        | NA       | 0.146371  | NA       | 0.148275 | NA       |
| AT1G63210 | AT1G63210 | 0        | 0        | 0        | 0.662467 | 0        | 0        | 0        | 0        | 0.995936 | 0        | 1.035907 | 0         | 0.109794 | NA       | 0         | NA       | 0.345429 | NA       |
| AT1G63220 | AT1G63220 | 85.60108 | 83.89596 | 115.8889 | 134.4475 | 166.9418 | 111.6462 | 56.02612 | 114.3623 | 148.3894 | 123.7801 | 78.4897  | 88.05205  | 0.498663 | 0.135767 | -0.141715 | 0.737331 | 0.024832 | 0.978296 |
| AT1G63230 | AT1G63230 | 36.85602 | 26.76369 | 37.34198 | 28.04426 | 20.53649 | 25.91786 | 29.34701 | 14.02557 | 18.54867 | 46.05771 | 38.57969 | 25.89766  | -0.41024 | 0.290377 | -0.63831  | 0.111013 | 0.108871 | 0.895902 |
| AT1G63240 | AT1G63240 | 336.4598 | 272.9896 | 271.6951 | 188.0615 | 164.2919 | 187.4061 | 186.5737 | 210.3835 | 166.9381 | 341.5947 | 423.0462 | 402.9676  | -0.69863 | 1.82E-05 | -0.63729  | 0.000175 | 0.392404 | 0.096302 |
| AT1G63245 | CL14      | 0        | 0        | 0        | 1.86234  | 5.962205 | 6.977885 | 5.35821  | 2.15778  | 8.786214 | 0        | 0        | 3.10772   | 1.82455  | 0.002094 | 1.628455  | 0.01042  | 0.397686 | NA       |
| AT1G63250 | RH48      | 45.17835 | 46.3904  | 42.49259 | 46.19054 | 42.39791 | 70.7757  | 35.57214 | 55.02339 | 62.49794 | 38.38143 | 45.23135 | 69.40574  | 0.212885 | 0.578057 | 1.73948   | 0.681902 | 0.179748 | 0.797187 |
| AT1G63260 | TEH10     | 273.4479 | 255.1472 | 242.079  | 191.3608 | 252.4    | 285.0965 | 201.8179 | 170.4646 | 195.2492 | 256.196  | 250.1028 | 300.4129  | -0.091   | 0.69125  | -0.42997  | 0.031103 | 0.065216 | 0.880097 |
| AT1G63270 | ABC11     | 84.41218 | 66.0171  | 59.2321  | 83.30795 | 96.72022 | 90.71251 | 99.60199 | 91.70564 | 114.2208 | 78.68192 | 55.87403 | 66.29802  | 0.342634 | 0.166493 | 0.517293  | 0.036239 | -0.05681 | 0.926068 |
| AT1G63280 | AT1G63280 | 3.566712 | 0        | 0        | 0.412416 | 0        | 0        | 0.889303 | 0        | 0        | 0.995936 | 1.330334 | 0         | -0.53038 | NA       | -0.41145  | NA       | -0.19806 | NA       |
| AT1G63290 | AT1G63290 | 139.1018 | 224.815  | 182.8469 | 254.8728 | 254.3874 | 248.2134 | 196.5316 | 206.068  | 255.7765 | 171.7569 | 148.9974 | 227.8994  | 0.469027 | 0.03158  | 0.271189  | 0.27525  | 0.02068  | 0.972983 |
| AT1G63295 | AT1G63295 | 26.15589 | 19.62671 | 38.62963 | 25.98218 | 29.14856 | 21.9305  | 15.11816 | 8.63112  | 18.54867 | 38.38143 | 31.92802 | 32.1131   | -0.12774 | 0.750883 | -0.89812  | 0.023706 | 0.243849 | 0.735019 |
| AT1G63300 | AT1G63300 | 221.1361 | 160.5182 | 151.9432 | 14.2156  | 54.32232 | 56.81992 | 69.36567 | 56.10228 | 62.47974 | 70.7757  | 174.2738 | 134.6678  | -1.7732  | 1.17E-16 | -1.45384  | 4.26E-11 | -0.15636 | 0.725981 |
| AT1G63310 | AT1G63310 | 45.17835 | 35.68492 | 46.35556 | 25.56977 | 19.87402 | 17.94313 | 25.7898  | 16.18335 | 29.28738 | 59.49121 | 31.92802 | 53.86714  | -0.91    |          |           |          |          |          |

|           |           |          |          |          |          |          |          |          |          |          |          |          |           |          |          |          |          |          |          |
|-----------|-----------|----------|----------|----------|----------|----------|----------|----------|----------|----------|----------|----------|-----------|----------|----------|----------|----------|----------|----------|
| AT1G63820 | AT1G63820 | 0        | 0        | 1.287654 | 2.886909 | 2.649869 | 1.993682 | 2.66791  | 5.39445  | 4.88123  | 1.919071 | 1.330334 | 2.071813  | 0.805882 | 0.235534 | 1.268048 | 0.055783 | 0.520864 | NA       |
| AT1G63830 | AT1G63830 | 413.7386 | 513.8629 | 435.2272 | 654.0911 | 646.5681 | 706.7601 | 793.2587 | 780.0374 | 855.1915 | 450.0222 | 605.302  | 428.8653  | 0.55292  | 0.000374 | 0.824718 | 4.94E-08 | 0.12084  | 0.708053 |
| AT1G63835 | AT1G63835 | 0        | 0        | 0.412416 | 0        | 0        | 0        | 0        | 0        | 0        | 0        | 0        | 0         | 0.095918 | NA       | 0        | NA       | 0        | NA       |
| AT1G63840 | AT1G63840 | 42.80054 | 30.33218 | 37.34198 | 82.48311 | 84.79581 | 80.7441  | 97.82338 | 71.20674 | 150.3419 | 45.09817 | 39.91002 | 44.54398  | 1.076137 | 0.000216 | 1.425134 | 6.6E-07  | 0.194831 | 0.768527 |
| AT1G63850 | AT1G63850 | 269.8812 | 210.541  | 227.9148 | 119.1881 | 127.8562 | 115.6335 | 113.8308 | 146.729  | 104.4583 | 233.1672 | 220.8354 | 252.7612  | -0.95044 | 2.39E-08 | -0.94656 | 8.21E-08 | -0.00745 | 0.988816 |
| AT1G63855 | AT1G63855 | 28.53369 | 32.11643 | 34.76667 | 37.1174  | 31.13596 | 27.91154 | 28.45771 | 24.81447 | 32.21612 | 30.70514 | 30.59768 | 31.10772  | 0.038253 | 0.928151 | -0.14141 | 0.741568 | -0.03972 | 0.963148 |
| AT1G63860 | AT1G63860 | 164.0687 | 142.7397 | 124.9025 | 160.8421 | 188.1407 | 209.3366 | 150.2923 | 174.7802 | 146.4369 | 95.9536  | 81.15037 | 103.5907  | 0.350795 | 0.083055 | 0.11975  | 0.636764 | -0.59811 | 0.02726  |
| AT1G63870 | AT1G63870 | 2.377808 | 3.568492 | 0        | 0.824831 | 1.987402 | 2.990522 | 6.252514 | 4.31556  | 0        | 0.959536 | 1.330334 | 3.10772   | -0.0492  | 0.954624 | 0.454358 | 0.557954 | -0.03463 | NA       |
| AT1G63880 | AT1G63880 | 898.8114 | 1093.743 | 888.4815 | 1059.083 | 1051.336 | 1221.13  | 1158.762 | 1223.461 | 869.8352 | 760.9118 | 766.2724 | 804.8994  | 0.207378 | 0.232533 | 0.174167 | 0.353179 | -0.29734 | 0.228165 |
| AT1G63900 | DALI      | 228.2696 | 297.9661 | 226.6272 | 270.957  | 224.5764 | 285.0965 | 287.245  | 228.7247 | 284.0876 | 225.4909 | 219.5051 | 206.1454  | 0.058767 | 0.795103 | 0.097648 | 0.671236 | -0.19552 | 0.552667 |
| AT1G63910 | ATMYB103  | 1.188904 | 1.784246 | 2.575309 | 1.649662 | 1.987402 | 0        | 2.66791  | 0        | 0.976246 | 2.878607 | 1.330334 | 4.143626  | -0.22351 | 0.780186 | -0.22701 | 0.788302 | 0.324499 | NA       |
| AT1G63920 | AT1G63920 | 0        | 0        | 0        | 0        | 0        | 0        | 0.889303 | 0        | 0.976246 | 0        | 0        | 0         | 0        | NA       | 0        | NA       | 0        | NA       |
| AT1G63930 | ROH1      | 0        | 3.568492 | 1.287654 | 2.062078 | 1.324935 | 3.987363 | 3.23667  | 0.976246 | 1.919071 | 2.660668 | 0        | 0         | 0.326826 | 0.670147 | 0.065278 | 0.941525 | -0.00193 | NA       |
| AT1G63940 | MDAR6     | 720.4758 | 672.6608 | 642.5395 | 581.0935 | 527.9864 | 556.2372 | 545.143  | 602.0206 | 501.7904 | 658.2414 | 662.5063 | 641.2261  | -0.28656 | 0.019211 | -0.30295 | 0.017085 | -0.05377 | 0.846992 |
| AT1G63950 | AT1G63950 | 0        | 0        | 0.412416 | 0.662467 | 0        | 0        | 0.889303 | 1.07889  | 0        | 0        | 0        | 0         | 0.405909 | NA       | 0.374081 | NA       | 0        | NA       |
| AT1G63960 | AT1G63960 | 0        | 0        | 1.287654 | 0.412416 | 0.662467 | 0        | 0        | 0        | 0        | 3.991002 | 1.035907 | 0         | -0.05841 | NA       | -0.27919 | NA       | 0.490896 | NA       |
| AT1G63970 | ISPF      | 769.2209 | 817.1847 | 845.9889 | 739.4611 | 897.6432 | 1.324935 | 719.719  | 801.2624 | 721.7774 | 1036.773 | 926.9114 | 947.1978  | -0.04399 | 0.837396 | 0.073069 | 0.738191 | 0.147158 | 0.636115 |
| AT1G63980 | AT1G63980 | 1425.496 | 1375.654 | 1568.363 | 1221.163 | 1277.237 | 1114.468 | 1412.214 | 1385.295 | 1426.295 | 1731.002 | 2324.093 | 1583.901  | -0.26992 | 0.097883 | -0.04871 | 0.819245 | 0.360387 | 0.100381 |
| AT1G63990 | SP011-2   | 2.377808 | 1.784246 | 1.287654 | 2.474493 | 2.649869 | 2.990522 | 0.889303 | 1.07889  | 0.952492 | 2.878607 | 2.660668 | 5.179533  | 0.29013  | 0.709132 | -0.23706 | 0.780446 | 0.544093 | NA       |
| AT1G64000 | WRKY56    | 0        | 0        | 0        | 0.412416 | 0.662467 | 0        | 0.889303 | 0        | 0        | 0        | 0        | 0         | 0.457403 | NA       | 0.144287 | NA       | 0        | NA       |
| AT1G64010 | AT1G64010 | 0        | 0        | 0        | 1.649662 | 2.649869 | 0        | 1.778607 | 1.07889  | 1.952492 | 0        | 0        | 0.2071813 | 0.686514 | 0.269729 | 0.698045 | 0.27422  | 0.316982 | NA       |
| AT1G64020 | AT1G64020 | 1.188904 | 0        | 0        | 0        | 1.324935 | 0        | 0        | 0        | 0        | 0        | 0        | 0         | 0.030611 | NA       | -0.18362 | NA       | -0.17911 | NA       |
| AT1G64030 | ATSRP3    | 0        | 1.784246 | 1.287654 | 0        | 0        | 0        | 1.778607 | 1.07889  | 0        | 0        | 1.919071 | 0         | -0.50877 | NA       | -0.46977 | NA       | -0.09982 | NA       |
| AT1G64035 | AT1G64035 | 1.188904 | 0        | 0        | 0        | 0        | 0        | 1.778607 | 1.07889  | 0        | 0        | 0        | 0         | -0.27694 | NA       | 0.267261 | NA       | -0.23146 | NA       |
| AT1G64040 | TOPP3     | 513.6065 | 574.5272 | 623.2247 | 656.978  | 702.8778 | 687.8201 | 665.199  | 619.2828 | 759.5194 | 491.2822 | 582.6863 | 501.3788  | 0.25584  | 0.07809  | 0.254492 | 0.09467  | -0.11991 | 0.659653 |
| AT1G64050 | AT1G64050 | 315.0595 | 360.4177 | 288.4346 | 280.4426 | 305.3974 | 316.9954 | 361.9465 | 387.3215 | 180.6055 | 232.2076 | 278.0398 | 193.1615  | -0.08978 | 0.77364  | -0.04778 | 0.889928 | -0.25086 | 0.579215 |
| AT1G64060 | RBOHF     | 181.9023 | 201.6198 | 207.3123 | 305.1875 | 239.1507 | 361.8532 | 269.459  | 277.2747 | 158.1519 | 233.1672 | 214.1838 | 296.1262  | 0.593895 | 0.01052  | 0.264054 | 0.37332  | 0.121545 | 0.81058  |
| AT1G64065 | AT1G64065 | 21.40027 | 23.1952  | 27.04074 | 46.19054 | 47.69764 | 65.79149 | 84.48383 | 85.23231 | 134.7219 | 12.47396 | 10.64267 | 9.323159  | 1.05092  | 0.001223 | 1.957076 | 1.62E-10 | -0.96961 | 0.072708 |
| AT1G64070 | RLM1      | 1.188904 | 0        | 3.862963 | 0.412416 | 0.662467 | 0        | 1.778607 | 1.07889  | 0        | 0        | 1.330334 | 1.035907  | -0.65294 | 0.309252 | -0.30206 | 0.883266 | -0.4039  | NA       |
| AT1G64080 | MAKR2     | 73.71204 | 60.66437 | 77.25926 | 89.9066  | 75.52127 | 71.77254 | 87.15174 | 81.99564 | 55.64602 | 80.60099 | 61.19536 | 75.62118  | 0.159783 | 0.58705  | 0.073538 | 0.833395 | 0.035205 | 0.959593 |
| AT1G64090 | RTNLB3    | 964.2011 | 1047.352 | 1067.465 | 1094.139 | 1352.096 | 1151.351 | 1026.256 | 910.5831 | 1190.044 | 1010.391 | 760.951  | 1070.191  | 0.220799 | 0.226391 | 0.022607 | 0.925246 | -0.11141 | 0.746516 |
| AT1G64100 | AT1G64100 | 8.322328 | 3.568492 | 12.87654 | 1.649662 | 3.312336 | 0.996841 | 3.527214 | 3.23667  | 0.976246 | 6.335821 | 3.991002 | 7.251346  | -1.392   | 0.109137 | -1.14637 | 0.072314 | -0.23643 | NA       |
| AT1G64105 | ANAC027   | 0        | 3.568492 | 0        | 2.062078 | 1.987402 | 0        | 1.07889  | 2.928738 | 0.959536 | 0        | 0        | 0         | 0.164856 | 0.823142 | 0.107489 | 0.890801 | -0.29636 | NA       |
| AT1G64107 | AT1G64107 | 0        | 0        | 1.287654 | 1.649662 | 1.987402 | 1.993682 | 0.889303 | 4.31556  | 0        | 1.919071 | 0        | 0.2071813 | 0.569813 | 0.407589 | 0.486689 | 0.503635 | 0.376246 | NA       |
| AT1G64110 | AT1G64110 | 7.133424 | 3.568492 | 3.862963 | 0.824831 | 0        | 5.981045 | 4.46517  | 3.23667  | 0.976246 | 5.757214 | 1.330334 | 8.287252  | -0.71696 | 0.301167 | -0.42491 | 0.58815  | 0.065924 | NA       |
| AT1G64120 | AT1G64120 | 0        | 0        | 0        | 0        | 0        | 0        | 0        | 0        | 0        | 0        | 0        | 0         | #N/A     | #N/A     | #N/A     | #N/A     | #N/A     | #N/A     |
| AT1G64130 | AT1G64130 | 0        | 0        | 0        | 0        | 0        | 0        | 0        | 0        | 0        | 0        | 0        | 0         | #N/A     | #N/A     | #N/A     | #N/A     | #N/A     | #N/A     |
| AT1G64140 | AT1G64140 | 0        | 0        | 0        | 0        | 0        | 0        | 0        | 0        | 0        | 0        | 0        | 0         | #N/A     | #N/A     | #N/A     | #N/A     | #N/A     | #N/A     |
| AT1G64142 | CPuORF23  | 0        | 0        | 0        | 0        | 0        | 0        | 0        | 0        | 0        | 0        | 0        | 0         | #N/A     | #N/A     | #N/A     | #N/A     | #N/A     | #N/A     |
| AT1G64150 | AT1G64150 | 285.3369 | 344.3595 | 321.9136 | 244.15   | 219.2767 | 226.2829 | 417.9726 | 309.6414 | 299.7075 | 385.7333 | 291.3431 | 441.2962  | -0.44782 | 0.025118 | 0.112918 | 0.654011 | 0.234403 | 0.498675 |
| AT1G64160 | DIRS      | 0        | 0        | 0        | 0.824831 | 0.662467 | 0        | 0.889303 | 0        | 0        | 0        | 0        | 0         | 0.28583  | NA       | 0.151646 | NA       | 0        | NA       |
| AT1G64170 | CHX16     | 32.10041 | 28.54794 | 24.46543 | 119.1881 | 112.6194 | 137.564  | 85.37313 | 102.4945 | 75.17094 | 15.35257 | 13.30334 | 19.68222  | 2.013298 | 2.41E-15 | 1.535731 | 8.61E-09 | -0.7219  | 0.143833 |
| AT1G64180 | AT1G64180 | 101.0568 | 130.25   | 110.7383 | 61.44992 | 72.20893 | 56.81992 | 58.64093 | 86.3112  | 102.6058 | 99.79171 | 78.4897  | 96.33991  | -0.79852 | 0.000792 | -0.44407 | 0.095077 | -0.28869 | 0.506385 |
| AT1G64185 | AT1G64185 | 11.88904 | 5.352738 | 12.87654 | 13.60971 | 16.56168 | 13.95577 | 13.39955 | 15.10446 | 27.33489 | 11.51443 | 13.30334 | 6.215439  | 0.415303 | 0.430863 | 0.708746 | 0.169616 | -0.02441 | NA       |
| AT1G64190 | AT1G64190 | 452.9724 | 431.7875 | 375.9951 | 282.9171 | 342.4956 | 299.0522 | 280.1306 | 325.8248 | 375.8547 | 327.2016 | 317.9498 | 325.2747  | -0.44132 | 0.005209 | -0.3556  | 0.035179 | -0.37034 | 0.106412 |
| AT1G64195 | AT1G64195 | 0        | 0        | 0        | 0        | 1.778607 | 0        | 0        | 1.952492 | 0        | 0        | 0        | 0.1035907 | 0        | NA       | 0.059037 | NA       | 0.175357 | NA       |
| AT1G64200 | VHA-E3    | 114.1348 | 178.4246 | 213.7506 | 155.8931 | 184.8284 | 181.425  | 200.0933 | 170.4646 | 221.6078 | 399.1668 | 464.2866 | 342.8851  | 0.042494 | 0.889124 | 0.223502 | 0.412899 | 1.215791 | 3.14E-07 |
| AT1G64210 | AT1G64210 | 4.755616 | 0        | 2.575309 | 2.062078 | 2.649869 | 2.990522 | 1.778607 | 5.39445  | 2.928738 | 2.878607 | 3.991002 | 4.143626  | -0.07136 | 0.933733 | 0.179512 | 0.834128 | 0.26603  | NA       |
| AT1G64220 | TOM7-2    | 4.755616 | 1.784246 | 1.287654 | 4.124156 | 2.649869 | 0.996841 | 3.535821 | 2.15778  | 8.786214 | 1.919071 | 9.312338 | 5.179533  | -0.02495 | 0.97658  | 0.630206 | 0.411382 | 0.56392  | NA       |
| AT1G64230 | UBC28     | 3614.268 | 3861.108 | 3756.088 | 3617.297 | 4100.01  | 3591.617 | 3756.418 | 3661.752 | 3819.074 | 3240.352 | 3740.899 | 3134.653  | 0.010293 | 0.947021 | 0.001133 | 0.994224 | -0.15011 | 0.42371  |
| AT1G64235 | AT1G64235 | 0        | 0        | 0        | 0        | 0        | 0        | 0.889303 | 0        | 1.952492 | 0.959536 | 0        | 0.1035907 | -0.61799 | NA       | 0.03102  | NA       | -0.1075  | NA       |
| AT1G64240 | AT1G64240 | 0        | 1.784246 | 1.287654 | 0        | 0        | 0        | 0.889303 | 0        | 1.952492 | 0.959536 | 0        | 0.1035907 | -0.61799 | NA       | 0.03102  | NA       | -0.1075  | NA       |
| AT1G64250 | AT1G64250 | 13.07794 | 8.92123  | 12.87654 | 4.948987 | 2.649869 | 3.987363 | 8.003731 | 3.23667  | 0.976246 | 6.762625 | 14.63367 | 11.39497  | -1.20476 | 0.026973 | -1.11677 | 0.055823 | -0.06139 | NA       |
| AT1G64255 | AT1G64255 | 0        | 0        | 0        | 0.412416 | 0.662467 | 0        | 1.778607 | 0        | 0        | 0        | 0        | 0         | 0.191226 | NA       | 0.295924 | NA       | 0        | NA       |
| AT1G64260 | AT1G64260 | 16.64466 | 10.70548 | 12.87654 | 7.835896 | 5.299738 | 8.971567 | 9.782338 | 5.39445  | 7.809968 | 15.35257 | 9.312338 | 8.287252  | -0.7447  |          |          |          |          |          |

|           |           |          |          |          |          |          |          |          |          |          |          |          |          |          |          |           |          |          |          |
|-----------|-----------|----------|----------|----------|----------|----------|----------|----------|----------|----------|----------|----------|----------|----------|----------|-----------|----------|----------|----------|
| AT1G64650 | AT1G64650 | 890.4891 | 692.2875 | 705.6346 | 508.096  | 561.7722 | 583.1519 | 562.0398 | 544.8394 | 466.6456 | 597.7907 | 619.9356 | 601.8617 | -0.46899 | 0.000913 | -0.53595  | 0.00018  | -0.32986 | 0.113698 |
| AT1G64660 | MGL       | 115.3237 | 99.91778 | 91.42346 | 85.78244 | 72.20893 | 76.75674 | 95.15547 | 130.5457 | 86.85879 | 87.31774 | 57.20436 | 66.29802 | -0.36797 | 0.147827 | 0.020059  | 0.95327  | -0.50946 | 0.168123 |
| AT1G64670 | BGD1      | 137.9129 | 133.8185 | 122.3272 | 113.2019 | 96.05775 | 147.3244 | 88.04104 | 72.28563 | 85.57476 | 134.335  | 127.7121 | 120.1652 | -0.15164 | 0.058866 | -0.81378  | 0.000361 | -0.04122 | 0.934411 |
| AT1G64680 | AT1G64680 | 911.8893 | 1095.527 | 1015.959 | 806.2724 | 762.4998 | 659.9086 | 1219.235 | 1224.54  | 1474.131 | 1216.691 | 1346.298 | 1110.492 | -0.42904 | 0.003133 | 0.37089   | 0.013627 | 0.278182 | 0.211769 |
| AT1G64690 | BLT       | 27.34479 | 14.27997 | 23.17778 | 17.32145 | 19.87402 | 14.95261 | 14.22886 | 28.05114 | 31.23987 | 39.34096 | 34.58868 | 18.64632 | -0.3001  | 0.526723 | 0.125262  | 0.821695 | 0.430869 | 0.555797 |
| AT1G64700 | AT1G64700 | 8.322328 | 12.48972 | 10.30123 | 10.31039 | 10.59948 | 8.971567 | 11.86779 | 15.61994 | 8.63821  | 9.312338 | 9.323163 |          | -0.01889 | 0.976282 | 0.302438  | 0.066159 | -0.13832 | NA       |
| AT1G64710 | AT1G64710 | 265.1256 | 365.7704 | 315.4753 | 722.1397 | 626.0316 | 666.8865 | 811.9341 | 879.2953 | 762.4481 | 629.6295 | 356.5295 | 273.4973 | 1.07986  | 2.2E-12  | 1.357956  | 1.82E-13 | -0.07013 | 0.858201 |
| AT1G64720 | CP5       | 114.2078 | 16548.88 | 14059.9  | 7303.055 | 5984.067 | 6939.007 | 5509.235 | 7401.185 | 7460.472 | 12285.89 | 9954.889 | 12577.98 | -1.12465 | 1.02E-13 | -1.11468  | 4.87E-19 | -0.35438 | 0.134699 |
| AT1G64730 | AT1G64730 | 0        | 0        | 0        | 0        | 0        | 0        | 0        | 0        | 0        | 0        | 0        | 1.035907 | 0        | NA       | 0         | NA       | 0.172362 | NA       |
| AT1G64740 | TUBA1     | 468.4282 | 460.3355 | 430.0766 | 407.879  | 344.483  | 475.4931 | 402.8545 | 450.976  | 297.755  | 347.3519 | 316.6195 | 350.1364 | -0.14599 | 0.492011 | -0.23411  | 0.265275 | -0.41116 | 0.123878 |
| AT1G64750 | DSS1(I)   | 315.0595 | 337.2225 | 370.8445 | 658.2153 | 694.9282 | 470.5088 | 444.6517 | 370.0592 | 904.0038 | 414.5194 | 482.9112 | 424.7217 | 0.791834 | 0.004359 | 0.70918   | 0.013888 | 0.349112 | 0.474426 |
| AT1G64760 | AT1G64760 | 96.30122 | 76.72258 | 83.69753 | 94.85558 | 90.09555 | 134.5735 | 120.9453 | 118.6779 | 97.6246  | 98.83217 | 122.3907 | 94.26799 | 0.276991 | 0.278728 | 0.370265  | 0.156595 | 0.269701 | 0.526799 |
| AT1G64770 | PNSB2     | 666.9571 | 690.5032 | 636.1012 | 496.5484 | 437.8909 | 396.7426 | 614.5087 | 685.0951 | 845.429  | 772.4262 | 831.4587 | 830.797  | -0.56784 | 0.000141 | 0.104667  | 0.585961 | 0.284648 | 0.225633 |
| AT1G64780 | AMT1-2    | 52.31177 | 32.11643 | 41.20494 | 10.31039 | 9.937009 | 4.984204 | 8.893035 | 7.55223  | 4.86214  | 40.3005  | 35.91902 | 33.14901 | -2.04435 | 3.86E-09 | -2.0664   | 3.16E-08 | -0.19846 | 0.781222 |
| AT1G64790 | ILA       | 1355.35  | 1111.585 | 972.179  | 515.5195 | 474.989  | 711.7443 | 770.1368 | 811.3252 | 743.2157 | 893.3277 | 905.9574 | 1029.691 | -0.98094 | 1.34E-05 | -0.73731  | 0.001724 | -0.27193 | 0.514465 |
| AT1G64800 | AT1G64800 | 0        | 1.784246 | 0        | 0        | 0        | 0        | 0        | 0        | 0        | 0        | 0        | 0        | -0.2184  | NA       | -0.20558  | NA       | -0.19918 | NA       |
| AT1G64810 | APO1      | 285.3369 | 324.7328 | 301.3111 | 299.0013 | 288.8357 | 347.8974 | 404.6331 | 452.0549 | 380.7359 | 313.7682 | 279.3701 | 327.3465 | 0.035373 | 0.856726 | 0.438299  | 0.003803 | 0.021514 | 0.958517 |
| AT1G64820 | AT1G64820 | 3.566712 | 0        | 1.287854 | 0        | 0        | 0.996841 | 0.889303 | 1.07889  | 0.976246 | 0.995936 | 2.660668 | 1.035907 | -0.7919  | 0.220588 | -0.30524  | 0.690043 | -0.07808 | NA       |
| AT1G64830 | AT1G64830 | 0        | 0        | 0        | 0        | 0        | 0        | 1.07889  | 0        | 0        | 0        | 0        | 1.035907 | 0        | NA       | 0.157605  | NA       | 0.157555 | NA       |
| AT1G64840 | AT1G64840 | 123.646  | 103.4863 | 103.0123 | 99.39215 | 113.9444 | 105.6651 | 106.7164 | 119.7568 | 110.3158 | 97.87263 | 74.4987  | 105.6625 | -0.05797 | 0.824644 | -0.019871 | 0.946003 | -0.23586 | 0.533237 |
| AT1G64850 | AT1G64850 | 325.7597 | 465.6882 | 382.4333 | 574.9073 | 590.9208 | 470.5088 | 488.2276 | 397.0315 | 644.3224 | 414.5194 | 492.2236 | 497.2351 | 0.473069 | 0.023492 | 0.376782  | 0.092266 | 0.254822 | 0.48203  |
| AT1G64860 | SIGA      | 2357.597 | 2517.571 | 2464.57  | 1283.85  | 1370.645 | 1331.779 | 1374.863 | 1286.037 | 1019.201 | 2633.925 | 2642.043 | 2732.721 | -0.87172 | 8.56E-14 | -0.98506  | 3.77E-17 | 0.125084 | 0.590246 |
| AT1G64870 | AT1G64870 | 0        | 0        | 0        | 0.412416 | 0        | 0.996841 | 0        | 0        | 0        | 0        | 0        | 0        | 0.224618 | NA       | 0         | NA       | 0        | NA       |
| AT1G64880 | AT1G64880 | 520.7399 | 513.8629 | 498.3222 | 454.0695 | 447.1654 | 410.6984 | 401.9652 | 443.4238 | 447.1207 | 414.5194 | 377.8148 | 496.1992 | -0.21863 | 0.136579 | -0.24381  | 0.111634 | -0.24422 | 0.271055 |
| AT1G64890 | AT1G64890 | 84.41218 | 94.56504 | 78.54691 | 80.42104 | 80.15854 | 70.7757  | 88.93035 | 93.86342 | 104.4583 | 77.72239 | 53.21336 | 87.01615 | -0.13381 | 0.62247  | 0.160041  | 0.572987 | -0.2091  | 0.637826 |
| AT1G64900 | CYP89A2   | 625.3635 | 651.2498 | 668.2926 | 336.1187 | 274.9239 | 295.0649 | 349.4963 | 370.0592 | 335.8286 | 639.0507 | 500.2056 | 688.8778 | -1.08051 | 4.23E-14 | -0.86842  | 3.26E-09 | -0.08425 | 0.795239 |
| AT1G64910 | UGT79B10  | 0        | 0        | 0        | 0.412416 | 0        | 0        | 0        | 0        | 0        | 0        | 1.330334 | 1.035907 | 0.073248 | NA       | 0         | NA       | 0.388114 | NA       |
| AT1G64920 | UGT79B11  | 0        | 0        | 0        | 0        | 0        | 0        | 0        | 0        | 0        | 0        | 0        | 1.035907 | 0        | NA       | 0         | NA       | 0.172362 | NA       |
| AT1G64930 | CYP89A7   | 3.566712 | 3.568492 | 5.150617 | 2.886909 | 3.123236 | 0.996841 | 4.446517 | 5.39445  | 7.809968 | 8.388143 | 5.321336 | 8.287252 | -0.4772  | 0.490156 | 0.361103  | 0.629878 | 0.345166 | NA       |
| AT1G64940 | CYP89A6   | 34.47821 | 39.25341 | 27.04074 | 41.24156 | 41.07297 | 32.89575 | 35.57214 | 53.9445  | 51.74104 | 26.867   | 26.60668 | 22.78994 | 0.210454 | 0.562253 | 0.465614  | 0.179596 | -0.35958 | 0.549468 |
| AT1G64950 | CYP89A5   | 310.3039 | 321.1643 | 275.558  | 375.2982 | 347.7953 | 386.7742 | 403.7438 | 444.5027 | 474.4556 | 297.456  | 308.6375 | 260.1021 | 0.289307 | 0.001204 | 0.539465  | 0.000141 | -0.06499 | 0.84885  |
| AT1G64960 | AT1G64960 | 191.4135 | 140.9554 | 135.2037 | 82.0707  | 97.38269 | 118.6241 | 126.2811 | 124.0723 | 94.65986 | 137.2136 | 142.3457 | 147.0987 | -0.65505 | 0.052388 | -0.43129  | 0.068752 | -0.13504 | 0.768141 |
| AT1G64970 | VF4       | 322.193  | 283.6951 | 287.1469 | 379.8347 | 363.0321 | 390.7166 | 285.6464 | 310.7203 | 282.1351 | 347.3519 | 328.5925 | 310.772  | 0.334934 | 0.012178 | -0.02935  | 0.880571 | 0.13585  | 0.579265 |
| AT1G64980 | CDI       | 367.3713 | 362.2019 | 379.858  | 317.56   | 289.4982 | 286.0933 | 240.1119 | 252.4602 | 229.4178 | 352.1496 | 482.9112 | 351.1723 | -0.30498 | 0.065844 | -0.10309  | 0.000145 | 0.088467 | 0.947966 |
| AT1G64990 | GTG1      | 285.3369 | 306.8903 | 242.079  | 347.2539 | 368.9943 | 368.8311 | 337.064  | 381.927  | 327.0424 | 285.9416 | 256.7545 | 316.9874 | 0.376956 | 0.01339  | 0.325148  | 0.046078 | 0.05115  | 0.888867 |
| AT1G65000 | AT1G65000 | 33.28931 | 33.90067 | 29.61605 | 55.6761  | 62.27192 | 51.83572 | 44.23449 | 42.47974 | 39.34096 | 45.23135 | 27.96948 |          | 0.767823 | 0.009811 | 0.833385  | 0.006673 | 0.190198 | 0.77299  |
| AT1G65010 | AT1G65010 | 1366.051 | 876.0648 | 798.3457 | 288.6909 | 337.1958 | 365.8406 | 370.8396 | 428.3193 | 416.857  | 793.536  | 908.6181 | 847.3715 | -1.57928 | 1.95E-17 | -1.28967  | 8.32E-12 | -0.25003 | 0.47309  |
| AT1G65020 | AT1G65020 | 128.4016 | 137.3869 | 119.7519 | 203.7333 | 206.0273 | 187.4061 | 166.2998 | 171.5435 | 199.1542 | 133.3755 | 145.0064 | 147.0987 | 0.629327 | 0.000141 | 0.477237  | 0.008322 | 0.141814 | 0.687982 |
| AT1G65030 | AT1G65030 | 55.87849 | 89.2123  | 75.97161 | 91.14384 | 108.6446 | 84.73147 | 90.70896 | 75.5223  | 81.02842 | 74.84378 | 93.12338 | 69.40754 | 0.374669 | 0.134666 | 0.174363  | 0.555785 | 0.108535 | 0.846647 |
| AT1G65032 | AT1G65032 | 32.10041 | 44.60615 | 34.76667 | 43.71605 | 58.95959 | 30.90206 | 52.46891 | 39.91893 | 55.64602 | 31.66468 | 34.58868 | 33.14901 | 0.278873 | 0.433479 | 0.40491   | 0.26017  | -0.1396  | 0.851629 |
| AT1G65040 | HRD1B     | 403.0384 | 430.0033 | 481.5827 | 1465.313 | 1656.168 | 1553.078 | 1260.143 | 1021.709 | 890.3363 | 448.1031 | 465.6169 | 454.763  | 1.801397 | 1.06E-37 | 1.251111  | 2.98E-18 | 0.055733 | 0.87994  |
| AT1G65050 | AT1G65050 | 0        | 0        | 0        | 0.662467 | 0        | 2.66791  | 0        | 0        | 0        | 0        | 0        | 0        | 0.083675 | NA       | 0.363126  | NA       | 0.050227 | 0.936173 |
| AT1G65060 | 4CL3      | 78.46766 | 83.85956 | 96.57408 | 35.46774 | 50.34751 | 32.89575 | 35.57214 | 49.81447 | 42.26162 | 92.11542 | 94.45371 | 81.83662 | -1.07331 | 9.73E-06 | -1.39938  | 6.05E-08 | 0.050227 | 0.936173 |
| AT1G65070 | AT1G65070 | 306.7372 | 349.7122 | 311.6124 | 315.0855 | 282.8735 | 274.1312 | 393.9614 | 218.8822 | 286.0041 | 350.2305 | 391.1182 | 379.1418 | -0.14035 | 0.485119 | 0.183508  | 0.365243 | 0.209231 | 0.489522 |
| AT1G65080 | ALB1L     | 41.61164 | 28.54794 | 27.04074 | 39.5919  | 54.98478 | 47.84836 | 53.35821 | 37.76115 | 56.62227 | 37.42189 | 19.95501 | 18.64632 | 0.490314 | 0.167531 | 0.550375  | 0.138408 | -0.31721 | 0.636505 |
| AT1G65090 | AT1G65090 | 0        | 0        | 0        | 0.824831 | 0.662467 | 0        | 1.778607 | 1.07889  | 0        | 0        | 0        | 1.035907 | 0.278657 | NA       | 0.47952   | NA       | 0.172389 | NA       |
| AT1G65110 | AT1G65110 | 5.94452  | 7.136984 | 1.287654 | 2.886909 | 7.28714  | 10.96525 | 8.003731 | 8.63112  | 6.833722 | 7.676285 | 10.64267 | 6.215439 | 0.331097 | 0.624746 | 0.517572  | 0.448171 | 0.551644 | NA       |
| AT1G65113 | SCR1L     | 1.188904 | 0        | 0        | 0        | 0        | 0        | 0        | 0        | 0        | 0        | 1.330334 | 0        | -0.2006  | NA       | -0.2039   | NA       | 0.001199 | NA       |
| AT1G65120 | AT1G65120 | 10.70014 | 12.48972 | 16.73951 | 16.08421 | 17.22415 | 25.91786 | 32.01493 | 21.5778  | 11.71495 | 24.94793 | 18.62468 | 18.64632 | 0.448432 | 0.35201  | 0.610329  | 0.214342 | 0.547448 | 0.473308 |
| AT1G65130 | AT1G65130 | 2.377808 | 1.784246 | 7.725926 | 4.536571 | 1.987402 | 1.993682 | 2.66791  | 6.47334  | 6.833722 | 0.995936 | 5.321336 | 3.10772  | -0.27277 | 0.717401 | 0.255433  | 0.753912 | -0.25779 | NA       |
| AT1G65140 | AT1G65140 | 0        | 3.568492 | 0        | 0        | 0.996841 | 0        | 0        | 0        | 0.191907 | 0        | 0        | 0        | -0.30074 | NA       | -0.43259  | NA       | -0.12527 | NA       |
| AT1G65150 | AT1G65150 | 55.87849 | 26.76369 | 39.91728 | 23.50769 | 21.86142 | 19.93682 | 23.121   |          |          |          |          |          |          |          |           |          |          |          |



|           |           |          |          |          |          |          |          |            |          |          |          |          |          |          |          |          |          |          |          |
|-----------|-----------|----------|----------|----------|----------|----------|----------|------------|----------|----------|----------|----------|----------|----------|----------|----------|----------|----------|----------|
| AT1G66510 | AT1G66510 | 71.33424 | 76.72258 | 74.68395 | 63.512   | 87.44568 | 72.76938 | 64.91915   | 58.26006 | 62.47974 | 57.57214 | 49.22236 | 70.44164 | 0.00314  | 0.992657 | -0.24679 | 0.401739 | -0.304   | 0.490609 |
| AT1G66520 | pdE194    | 89.1678  | 103.4863 | 74.68395 | 90.31901 | 76.8462  | 67.78517 | 98.71269   | 63.65451 | 73.21845 | 94.03449 | 74.4987  | 96.33931 | -0.15409 | 0.596331 | -0.15823 | 0.616201 | 0.004541 | 0.995067 |
| AT1G66530 | AT1G66530 | 177.1467 | 206.9725 | 198.2988 | 201.2588 | 202.715  | 185.4124 | 174.3035   | 159.6757 | 129.8407 | 216.8551 | 214.1838 | 180.2477 | 0.025977 | 0.911286 | -0.31531 | 0.105895 | 0.072471 | 0.857778 |
| AT1G66534 | AT1G66534 | 0        | 0        | 0        | 0        | 0        | 0        | 0          | 0        | 0        | 0        | 0        | 0        | #N/A     | #N/A     | #N/A     | #N/A     | #N/A     | #N/A     |
| AT1G66540 | AT1G66540 | 72.52314 | 67.80135 | 65.67037 | 83.72036 | 81.48347 | 95.69671 | 73.81219   | 89.54786 | 68.33722 | 118.9824 | 118.3997 | 119.1293 | 0.316139 | 0.171017 | 0.155254 | 0.579005 | 0.765443 | 0.003567 |
| AT1G66550 | WRKY67    | 0        | 0        | 0        | 0        | 0        | 0        | 0.824831   | 0.996841 | 0        | 0        | 0        | 0        | 0.705461 | NA       | 0        | NA       | 0        | NA       |
| AT1G66553 | AT1G66553 | 0        | 0        | 0        | 0        | 0        | 0        | 0.889303   | 0        | 0        | 0        | 0        | 0        | 0        | NA       | 0.160764 | NA       | 0        | NA       |
| AT1G66560 | WRKY64    | 0        | 0        | 0        | 0.412416 | 0.662467 | 0        | 0          | 0        | 0        | 0        | 0        | 0        | 0.196313 | NA       | 0        | NA       | 0        | NA       |
| AT1G66570 | SUC7      | 0        | 0        | 2.575309 | 8.248311 | 9.274542 | 11.96209 | 14.22886   | 12.94668 | 7.809968 | 1.919071 | 0        | 3.10772  | 1.858645 | 0.001262 | 2.067048 | 0.000376 | 0.232856 | NA       |
| AT1G66580 | RPL10C    | 1454.03  | 1514.825 | 1657.211 | 2272.822 | 2495.514 | 2372.481 | 2127.214   | 2058.522 | 2839.9   | 1548.691 | 1394.19  | 1568.362 | 0.617384 | 1.22E-05 | 0.594439 | 3.25E-05 | -0.03529 | 0.923603 |
| AT1G66590 | ATCOX19-1 | 68.95643 | 105.2705 | 78.54691 | 206.2078 | 280.8861 | 188.4029 | 165.4104   | 145.6501 | 214.7741 | 100.7512 | 101.1054 | 97.37521 | 1.385077 | 6.38E-10 | 1.032443 | 0.000011 | 0.247206 | 0.594966 |
| AT1G66600 | WRKY63    | 0        | 1.784246 | 0        | 15.67179 | 21.86142 | 20.93366 | 8.893035   | 10.7889  | 19.52492 | 0        | 1.330334 | 1.035907 | 2.889001 | 9.88E-08 | 2.359942 | 2.93E-05 | -0.01754 | NA       |
| AT1G66610 | AT1G66610 | 0        | 0        | 0        | 0.412416 | 0        | 0        | 1.778607   | 0        | 0        | 0        | 0        | 0        | 0.041097 | NA       | 0.262196 | NA       | 0.294751 | NA       |
| AT1G66620 | AT1G66620 | 34.47821 | 24.97944 | 42.49259 | 35.05532 | 21.86142 | 40.87047 | 13.33955   | 21.5778  | 20.50117 | 28.78607 | 35.91902 | 38.32854 | -0.08046 | 0.857321 | -0.82107 | 0.033564 | -0.00649 | 0.994969 |
| AT1G66630 | AT1G66630 | 0        | 0        | 0        | 0        | 0        | 0        | 0          | 0        | 0.976246 | 0.995936 | 0        | 2.071813 | 0        | NA       | 0.162681 | NA       | 0.499762 | NA       |
| AT1G66640 | AT1G66640 | 0        | 0        | 0        | 0        | 0        | 0        | 0          | 0        | 0        | 0        | 0        | 0        | #N/A     | #N/A     | #N/A     | #N/A     | #N/A     | #N/A     |
| AT1G66650 | AT1G66650 | 5.94452  | 5.352738 | 9.01358  | 8.660727 | 9.274542 | 4.984204 | 8.003731   | 6.47334  | 7.809968 | 2.878607 | 5.321336 | 6.215439 | 0.165722 | 0.807341 | 0.097251 | 0.898075 | -0.38335 | NA       |
| AT1G66660 | AT1G66660 | 79.65566 | 58.88012 | 61.80741 | 108.8777 | 115.2693 | 72.76938 | 88.04104   | 106.8101 | 150.3419 | 75.80331 | 71.83803 | 79.7648  | 0.542233 | 0.050755 | 0.735291 | 0.007925 | 0.163497 | 0.780462 |
| AT1G66670 | CLPP3     | 836.9884 | 897.4758 | 932.2617 | 1041.349 | 1188.466 | 1060.639 | 1285.044   | 1222.382 | 1643.998 | 1051.651 | 1122.802 | 1041.086 | 0.299461 | 0.041416 | 0.630799 | 4.54E-06 | 0.26617  | 0.227791 |
| AT1G66680 | AR401     | 303.1705 | 346.1437 | 327.0642 | 466.0296 | 442.5281 | 385.7774 | 416.194    | 376.5326 | 485.1943 | 302.2537 | 332.5835 | 291.0897 | 0.409158 | 0.007779 | 0.38675  | 0.016138 | -0.07441 | 0.835663 |
| AT1G66690 | AT1G66690 | 1.188904 | 1.784246 | 3.862963 | 5.737818 | 7.949607 | 9.968408 | 8.893035   | 10.7889  | 9.928738 | 2.878607 | 1.330334 | 2.071813 | 1.124105 | 0.066669 | 1.075083 | 0.097051 | -0.08299 | NA       |
| AT1G66700 | PXMT1     | 2.377808 | 5.352738 | 6.438272 | 14.22834 | 172.904  | 119.6209 | 168.9677   | 165.0702 | 134.7219 | 4.797678 | 6.65167  | 4.143626 | 4.258464 | 8.26E-32 | 4.354176 | 4.2E-33  | -0.00219 | 0.998453 |
| AT1G66710 | AT1G66710 | 0        | 1.784246 | 0        | 1.237247 | 0        | 0.996841 | 0.889303   | 0        | 0        | 0        | 0        | 1.035907 | 0.139331 | NA       | -0.10614 | NA       | -0.07802 | NA       |
| AT1G66720 | AT1G66720 | 0        | 0        | 0        | 0        | 0        | 0        | 0.889303   | 0        | 0        | 0.995936 | 0        | 0        | 0        | NA       | 0.13694  | NA       | 0.147196 | NA       |
| AT1G66725 | MIR163    | 77.27876 | 92.78079 | 95.28642 | 233.0148 | 238.4882 | 176.4408 | 110.2736   | 77.68008 | 93.71962 | 74.84378 | 86.47171 | 85.98024 | 1.266487 | 4.17E-10 | 0.092684 | 0.762734 | -0.09714 | 0.855952 |
| AT1G66730 | ATLIG6    | 228.2696 | 258.7157 | 235.6407 | 131.5606 | 108.6446 | 139.5577 | 207.2077   | 197.4369 | 115.197  | 230.2886 | 215.5141 | 237.2226 | -0.8995  | 1.63E-05 | -0.45732 | 0.047948 | -0.07443 | 0.881338 |
| AT1G66740 | AS1A      | 190.2246 | 171.2876 | 220.1889 | 220.2299 | 335.2084 | 228.2765 | 249.005    | 222.2513 | 299.7075 | 198.6239 | 266.0668 | 210.289  | 0.412134 | 0.071655 | 0.389726 | 0.106809 | 0.198578 | 0.637671 |
| AT1G66750 | CDK2      | 109.3792 | 117.7602 | 117.1765 | 98.15491 | 121.2315 | 123.6083 | 120.056    | 83.07453 | 90.79088 | 119.942  | 103.766  | 99.44703 | -0.01386 | 0.962378 | -0.21278 | 0.414466 | -0.08314 | 0.869018 |
| AT1G66760 | AT1G66760 | 120.0793 | 107.0548 | 133.9161 | 96.50524 | 97.38269 | 149.5261 | 169.857    | 146.729  | 156.1994 | 172.7164 | 138.3547 | 161.6014 | -0.09931 | 0.178061 | 0.372202 | 0.122341 | 0.374781 | 0.282236 |
| AT1G66770 | SWEET6    | 0        | 0        | 0        | 0        | 0        | 0        | 0          | 0        | 0        | 0        | 0        | 0        | #N/A     | #N/A     | #N/A     | #N/A     | #N/A     | #N/A     |
| AT1G66780 | AT1G66780 | 3.566712 | 0        | 1.287654 | 2.886909 | 5.299738 | 7.974726 | 3.557214   | 2.15778  | 1.952492 | 0.995936 | 0        | 0        | 0.9461   | 0.155868 | 0.263733 | 0.752980 | -0.62996 | NA       |
| AT1G66783 | MIR157A   | 0        | 0        | 0        | 0.824831 | 1.324935 | 0.996841 | 0.889303   | 1.07889  | 0        | 0.995936 | 2.660668 | 1.035907 | 0.553116 | 0.385284 | 0.327271 | 0.638314 | 0.73515  | NA       |
| AT1G66790 | AT1G66790 | 0        | 0        | 0        | 0        | 0        | 0        | 0          | 0        | 0        | 0        | 0        | 0        | #N/A     | #N/A     | #N/A     | #N/A     | #N/A     | #N/A     |
| AT1G66795 | MIR157B   | 0        | 0        | 0        | 0        | 0        | 0        | 0.889303   | 0        | 0        | 0        | 0        | 0        | 0        | NA       | 0.160764 | NA       | 0        | NA       |
| AT1G66800 | AT1G66800 | 0        | 0        | 1.287654 | 0.824831 | 0.662467 | 0        | 0          | 1.07889  | 0        | 0        | 0        | 0        | 0.072599 | NA       | -0.04799 | NA       | -0.23952 | NA       |
| AT1G66810 | AT1G66810 | 10.70014 | 19.62671 | 12.87654 | 4.124156 | 7.28714  | 7.974726 | 12.45025   | 3.23667  | 4.88123  | 11.51443 | 14.63367 | 11.39497 | -0.95486 | 0.063993 | -0.80072 | 0.155124 | -0.1423  | NA       |
| AT1G66820 | AT1G66820 | 55.87849 | 58.88012 | 42.49259 | 85.37002 | 90.09555 | 45.85468 | 72.92289   | 52.86561 | 214.7741 | 69.08657 | 93.12338 | 72.51346 | 0.439655 | 0.335793 | 0.985383 | 0.019297 | 0.5035   | 0.483588 |
| AT1G66830 | AT1G66830 | 19.02246 | 10.70548 | 23.17778 | 13.1973  | 13.91181 | 13.95577 | 31.12562   | 25.89336 | 17.57243 | 36.46235 | 18.62468 | 24.86176 | -0.36727 | 0.431728 | 0.412391 | 0.386541 | 0.517475 | 0.456833 |
| AT1G66840 | PMI2      | 394.7161 | 337.2225 | 289.7222 | 162.4917 | 158.3297 | 148.5293 | 216.1007   | 227.6458 | 246.014  | 330.0803 | 396.4395 | 313.8797 | -1.09851 | 3.29E-12 | -0.55858 | 0.000928 | 0.020488 | 0.963148 |
| AT1G66850 | AT1G66850 | 2.377808 | 7.136984 | 6.438272 | 0        | 0        | 0        | 0          | 0.889303 | 0        | 0        | 17.27164 | 11.97301 | -2.12733 | 0.000464 | -1.85635 | 0.003057 | 1.285322 | NA       |
| AT1G66852 | AT1G66852 | 0        | 0        | 0        | 0        | 0        | 0        | 0          | 0        | 0        | 0        | 0        | 0        | #N/A     | #N/A     | 0.160764 | NA       | 0        | NA       |
| AT1G66855 | AT1G66855 | 0        | 0        | 0        | 0        | 0        | 0        | 0          | 0        | 0        | 0        | 0        | 0        | #N/A     | #N/A     | #N/A     | #N/A     | #N/A     | #N/A     |
| AT1G66860 | AT1G66860 | 4.755616 | 0        | 2.575309 | 18.14629 | 21.86142 | 26.9147  | 12.45025   | 15.10446 | 20.50117 | 1.919071 | 2.660668 | 4.143626 | 2.264446 | 5.39E-06 | 1.83227  | 0.000491 | -0.00762 | NA       |
| AT1G66870 | AT1G66870 | 1.188904 | 1.784246 | 0        | 5.773818 | 5.299738 | 6.977885 | 8.003731   | 3.23667  | 6.833722 | 0        | 1.330334 | 1.035907 | 1.396105 | 0.024998 | 1.388506 | 0.031883 | -0.15305 | NA       |
| AT1G66880 | AT1G66880 | 439.8945 | 453.1983 | 354.1049 | 1615.844 | 1501.151 | 1493.267 | 1143.644   | 1185.7   | 931.3387 | 274.4272 | 290.0128 | 266.228  | 1.864556 | 1.04E-44 | 1.369783 | 4.44E-24 | -0.57504 | 0.001969 |
| AT1G66890 | AT1G66890 | 52.31175 | 74.93833 | 56.56169 | 77.12171 | 51.67245 | 48.8452  | 63.14055   | 71.20674 | 66.64835 | 83.4796  | 74.4987  | 79.7648  | -0.00819 | 0.982899 | 0.327462 | 0.308693 | 0.370846 | 0.436444 |
| AT1G66900 | AT1G66900 | 254.4254 | 223.0308 | 227.9148 | 223.5292 | 202.715  | 201.3618 | 207.2077   | 173.7013 | 169.8686 | 248.5197 | 250.1028 | 268.2998 | -0.16473 | 0.343511 | -0.35238 | 0.037376 | 0.115263 | 0.714095 |
| AT1G66910 | AT1G66910 | 168.8244 | 187.3458 | 132.6248 | 227.241  | 189.4656 | 230.2702 | 329.0423   | 295.6158 | 257.7289 | 144.8899 | 150.3277 | 134.6678 | 0.402636 | 0.033596 | 0.843378 | 2.08E-06 | -0.17467 | 0.633705 |
| AT1G66920 | AT1G66920 | 87.97889 | 132.0342 | 87.5605  | 371.9988 | 360.3822 | 366.8374 | 404.2052   | 386.2426 | 381.7122 | 51.81492 | 49.22236 | 63.1903  | 1.825661 | 1.9E-27  | 1.959754 | 3.58E-31 | -0.83719 | 0.010055 |
| AT1G66930 | AT1G66930 | 22.58917 | 14.27397 | 14.1642  | 22.27044 | 31.13596 | 26.9147  | 28.45771   | 12.94668 | 18.54867 | 5.757214 | 10.64267 | 16.5745  | 0.560673 | 0.213812 | 0.198202 | 0.727665 | -0.54923 | 0.488679 |
| AT1G66940 | AT1G66940 | 479.1283 | 526.3526 | 494.4593 | 450.7702 | 465.7145 | 465.5246 | 374.3967   | 276.1958 | 234.299  | 365.5831 | 457.6349 | 344.9569 | -0.11433 | 0.601008 | -0.7405  | 4.15E-05 | -0.35462 | 0.207802 |
| AT1G66950 | ABC39     | 4.755616 | 1.784246 | 0        | 0.412416 | 0        | 0.996841 | 0.889303   | 1.07889  | 0        | 0        | 0        | 0        | -0.736   | 0.22307  | -0.59223 | 0.354107 | -0.95463 | NA       |
| AT1G66960 | LUP5      | 21.40027 | 39.25341 | 20.60247 | 51.1691  | 33.8709  | 417.6763 | 69.36567   | 62.57562 | 27.33489 | 5.757214 | 6.65167  | 11.39497 | 3.745654 | 6.93E-34 | 0.907856 | 0.013156 | -1.38271 | 0.006601 |
| AT1G66970 | GDPD1     | 5055.22  | 3655.92  | 3483.105 | 2980.527 | 3206.342 | 3559.718 | 2728.383   | 2729.592 | 1903.68  | 2412.773 | 2375.976 | 2335.969 | -0.31696 | 0.102136 | -0.71255 | 7.46E-05 | -0.75875 | 0.000327 |
| AT1G66980 | GDPD2     | 1824.968 | 1643.291 | 1595.404 | 1332.927 | 1242.126 | 1673.696 | 1578.514</ |          |          |          |          |          |          |          |          |          |          |          |

|           |           |          |          |          |          |          |          |          |          |          |          |          |          |          |          |          |          |          |          |
|-----------|-----------|----------|----------|----------|----------|----------|----------|----------|----------|----------|----------|----------|----------|----------|----------|----------|----------|----------|----------|
| AT1G67400 | AT1G67400 | 45.17835 | 41.03766 | 66.95803 | 51.55195 | 37.09817 | 42.86415 | 60.47264 | 47.47116 | 32.21612 | 47.01725 | 62.5257  | 59.04667 | -0.20667 | 0.566177 | -0.12629 | 0.760567 | 0.113416 | 0.874236 |
| AT1G67410 | AT1G67410 | 90.3567  | 76.72258 | 87.5605  | 63.92441 | 88.10815 | 73.76622 | 80.92662 | 70.12785 | 64.43224 | 72.92471 | 89.13238 | 66.29802 | -0.1827  | 0.500008 | -0.23676 | 0.406254 | -0.16793 | 0.729505 |
| AT1G67420 | AT1G67420 | 43.98945 | 32.11643 | 49.2599  | 28.45667 | 15.89921 | 19.93682 | 30.26342 | 19.42002 | 17.57243 | 28.78607 | 37.24935 | 33.14901 | -0.79559 | 0.022609 | -0.75265 | 0.044644 | -0.25804 | 0.706841 |
| AT1G67430 | RPL17B    | 2315.985 | 2264.208 | 2259.833 | 3101.778 | 3332.873 | 2432.291 | 2076.524 | 1957.106 | 3533.034 | 2359.498 | 2498.367 | 2684.034 | 0.363709 | 0.106202 | 0.1413   | 0.599612 | 0.136641 | 0.756813 |
| AT1G67440 | emb1688   | 216.3805 | 214.1095 | 208.6    | 122.075  | 142.4305 | 119.6209 | 155.6281 | 159.6757 | 147.4131 | 184.2308 | 167.6221 | 218.5763 | -0.71943 | 0.10E-05 | -0.45729 | 0.009774 | -0.156   | 0.626543 |
| AT1G67450 | AT1G67450 | 0        | 0        | 0        | 0        | 0        | 0        | 0.889303 | 0        | 0        | 0        | 1.330334 | 0        | 0        | 0        | 0.141773 | NA       | 0.183636 | NA       |
| AT1G67455 | AT1G67455 | 1.188904 | 1.784246 | 0        | 0        | 0.662467 | 0        | 0        | 0        | 0        | 0.955536 | 0        | 0        | -0.35706 | 0        | -0.48524 | NA       | -0.27145 | NA       |
| AT1G67460 | AT1G67460 | 4.755616 | 7.136984 | 9.01358  | 3.299325 | 2.649869 | 0.996841 | 3.557214 | 2.15778  | 2.928738 | 10.55489 | 7.982004 | 9.323159 | -1.02699 | 0.08409  | -0.85324 | 0.189969 | 0.366266 | NA       |
| AT1G67470 | AT1G67470 | 48.74506 | 60.66347 | 60.51975 | 98.97974 | 126.5312 | 117.6272 | 207.2077 | 176.938  | 192.3205 | 47.01725 | 39.91002 | 50.75942 | 0.978125 | 6.05E-06 | 1.720706 | 8.87E-17 | -0.27245 | 0.553047 |
| AT1G67480 | AT1G67480 | 499.3397 | 526.3526 | 557.5543 | 541.5016 | 528.6489 | 530.3193 | 473.1095 | 508.1572 | 537.9115 | 512.392  | 533.4639 | 494.1274 | 0.016745 | 0.91661  | -0.05934 | 0.702549 | -0.04044 | 0.88388  |
| AT1G67481 | MIR839A   | 0        | 0        | 0        | 0        | 0        | 0        | 0        | 0        | 0.976246 | 0        | 0        | 0        | 0        | 0        | 0        | NA       | 0.16673  | NA       |
| AT1G67490 | GCS1      | 174.7689 | 139.1712 | 148.0802 | 173.2145 | 179.5286 | 190.3966 | 169.857  | 211.4624 | 130.817  | 130.4968 | 107.7571 | 166.781  | 0.217941 | 0.381347 | 0.135733 | 0.633515 | -0.18322 | 0.679323 |
| AT1G67500 | REV3      | 168.8244 | 133.8185 | 126.1901 | 94.85558 | 88.77061 | 138.5609 | 158.296  | 196.358  | 112.2683 | 130.4968 | 133.0334 | 135.7038 | -0.4153  | 0.111321 | 0.112233 | 0.731213 | -0.10308 | 0.856796 |
| AT1G67510 | AT1G67510 | 86.78999 | 51.74313 | 57.94445 | 47.01538 | 29.81103 | 50.83888 | 42.68657 | 48.55005 | 47.83605 | 51.81492 | 54.54369 | 66.29802 | -0.61036 | 0.037824 | -0.48872 | 0.129551 | -0.19126 | 0.748116 |
| AT1G67520 | AT1G67520 | 20.21137 | 17.84246 | 20.60247 | 101.8666 | 104.0074 | 114.6367 | 73.81219 | 89.54786 | 92.74337 | 18.23118 | 17.29434 | 18.64632 | 2.294358 | 1.59E-17 | 1.977214 | 1.15E-12 | -0.12251 | 0.879034 |
| AT1G67530 | PUB7      | 243.7253 | 249.7944 | 193.1482 | 171.1525 | 180.1911 | 223.2923 | 208.097  | 228.7247 | 201.1067 | 217.8146 | 254.0938 | 207.1813 | -0.2595  | 0.176669 | -0.10129 | 0.663328 | -0.01605 | 0.975755 |
| AT1G67540 | AT1G67540 | 0        | 0        | 0        | 0.412416 | 0        | 0        | 0        | 0        | 0        | 0        | 1.330334 | 0        | 0        | 0        | 0.067751 | NA       | 0.180865 | NA       |
| AT1G67550 | URE       | 317.4374 | 297.9691 | 298.7358 | 320.0345 | 294.1355 | 311.0143 | 272.1269 | 305.3259 | 215.7504 | 216.8551 | 226.1568 | 238.2585 | 0.016867 | 0.938178 | -0.20437 | 0.266762 | -0.41869 | 0.059911 |
| AT1G67560 | LOX6      | 479.1283 | 422.8663 | 385.0086 | 355.0898 | 298.1103 | 418.6731 | 335.2674 | 381.927  | 286.4041 | 411.6408 | 428.3675 | 351.1273 | -0.26346 | 0.173366 | -0.35373 | 0.070503 | -0.11147 | 0.768619 |
| AT1G67570 | AT1G67570 | 42.80054 | 39.25341 | 39.91728 | 37.94223 | 33.78583 | 50.83888 | 36.46144 | 44.23449 | 47.01725 | 38.57969 | 47.6517  | 0        | -0.02216 | 0.955004 | -0.05069 | 0.891885 | 0.152025 | 0.851918 |
| AT1G67580 | AT1G67580 | 380.4493 | 424.6506 | 368.2691 | 324.9833 | 287.5108 | 359.8595 | 329.9316 | 412.136  | 279.2064 | 339.6756 | 328.5925 | 365.675  | -0.26599 | 0.146076 | -0.19532 | 0.334891 | -0.17495 | 0.585344 |
| AT1G67590 | AT1G67590 | 150.9908 | 128.4657 | 145.5049 | 78.77137 | 68.23413 | 71.77254 | 64.91915 | 97.10009 | 74.12719 | 169.8730 | 121.0604 | 162.6373 | -0.91691 | 0.002006 | -0.50338 | 0.065779 | 0.092383 | 0.874304 |
| AT1G67600 | AT1G67600 | 5.94452  | 5.352738 | 12.87654 | 11.54764 | 17.22415 | 13.95577 | 17.78607 | 9.710009 | 5.857476 | 8.635821 | 7.982004 | 9.323159 | 0.641027 | 0.232533 | 0.35417  | 0.575634 | 0.05504  | NA       |
| AT1G67610 | AT1G67610 | 0        | 1.784246 | 3.862963 | 2.886909 | 0.662467 | 0        | 2.15778  | 0        | 0        | 0        | 0        | 0        | -0.13761 | 0.848344 | -0.39308 | 0.554688 | -0.70797 | NA       |
| AT1G67620 | AT1G67620 | 34.47821 | 30.33128 | 36.05427 | 70.93548 | 95.39529 | 37.87995 | 69.35657 | 48.55005 | 68.33722 | 50.85539 | 73.16837 | 49.72351 | 0.941943 | 0.005135 | 0.803535 | 0.204766 | 0.696835 | 0.177994 |
| AT1G67623 | 0         | 0        | 0        | 0        | 0.662467 | 0.996841 | 0        | 0        | 0        | 0        | 0        | 0        | 0        | 0.262313 | NA       | 0        | NA       | 0        | NA       |
| AT1G67626 | AT1G67626 | 4.755616 | 3.568492 | 2.575309 | 9.073143 | 7.949607 | 1.993682 | 2.66791  | 2.15778  | 6.833722 | 0        | 0        | 0        | 0.636827 | 0.355388 | 0.07078  | 0.936442 | -1.30279 | NA       |
| AT1G67630 | POLA2     | 101.0568 | 85.64381 | 84.98519 | 60.62509 | 44.38531 | 57.81677 | 42.68657 | 74.44341 | 44.90732 | 87.31774 | 81.15037 | 95.3034  | -0.70825 | 0.005421 | -0.72674 | 0.006812 | -0.04147 | 0.951197 |
| AT1G67635 | AT1G67635 | 0        | 0        | 0.824831 | 1.324935 | 0        | 5.738821 | 4.31556  | 11.71495 | 0.995936 | 0        | 0        | 0        | 0.286109 | 0.703373 | 2.106184 | 0.000459 | 0.119564 | NA       |
| AT1G67640 | AT1G67640 | 1.188904 | 3.568492 | 0        | 0        | 0.662467 | 0.996841 | 1.778607 | 1.07889  | 0        | 0.995936 | 0        | 0        | -0.44701 | 0.497927 | -0.17813 | 0.813148 | -0.48716 | NA       |
| AT1G67645 | AT1G67645 | 0        | 0        | 1.649622 | 0        | 0        | 0.889303 | 0        | 0        | 0        | 0        | 0        | 0        | 0.251328 | NA       | 0.119636 | 0        | 0        | NA       |
| AT1G67650 | AT1G67650 | 27.34479 | 30.33218 | 21.89012 | 25.56977 | 25.17376 | 31.8989  | 24.9005  | 32.3667  | 24.40615 | 25.90746 | 21.28534 | 12.43088 | 0.047548 | 0.919762 | 0.041256 | 0.935401 | -0.36345 | 0.595754 |
| AT1G67660 | AT1G67660 | 218.7583 | 189.1301 | 186.7099 | 237.9638 | 218.6142 | 229.2734 | 278.352  | 251.3814 | 379.7597 | 233.1672 | 199.5501 | 260.0125 | 0.198106 | 0.364743 | 0.59592  | 0.002242 | 0.214913 | 0.546547 |
| AT1G67670 | AT1G67670 | 0        | 0        | 0        | 0        | 0.662467 | 0        | 0        | 0        | 0        | 0        | 0        | 0        | 0.128567 | NA       | 0        | NA       | 0        | NA       |
| AT1G67680 | AT1G67680 | 592.0742 | 465.6882 | 516.3494 | 409.1163 | 435.9035 | 458.5468 | 488.2276 | 482.2638 | 450.0494 | 468.2534 | 478.9202 | 486.8761 | -0.27888 | 0.03745  | -0.15215 | 0.323265 | -0.13896 | 0.565866 |
| AT1G67690 | AT1G67690 | 77.28776 | 73.15409 | 65.67037 | 68.8734  | 63.59686 | 64.79465 | 85.37113 | 96.0212  | 51.74104 | 79.64146 | 81.15037 | 93.23159 | -0.12372 | 0.691453 | 0.102229 | 0.765594 | 0.224424 | 0.644410 |
| AT1G67700 | HHL1      | 2549.01  | 3354.383 | 3288.669 | 2816.538 | 2287.499 | 2091.372 | 2811.978 | 2516.389 | 3398.312 | 3704.767 | 3783.47  | 3437.138 | -0.44934 | 0.002584 | -0.06236 | 0.753025 | 0.246286 | 0.304889 |
| AT1G67710 | ARR11     | 67.76752 | 48.17464 | 68.24568 | 21.03319 | 20.53649 | 17.94313 | 23.12189 | 20.49891 | 18.54867 | 71.00564 | 54.54369 | 69.40574 | -1.53826 | 1.67E-08 | -1.48038 | 3.6E-07  | 0.047574 | 0.909596 |
| AT1G67720 | AT1G67720 | 199.7359 | 144.5239 | 157.0938 | 153.4186 | 135.8058 | 196.3776 | 197.4254 | 206.068  | 129.8407 | 210.1383 | 166.2917 | 185.4273 | -0.05956 | 0.843228 | -0.07863 | 0.804763 | 0.155025 | 0.74422  |
| AT1G67730 | KCR1      | 477.9394 | 526.3526 | 513.7741 | 434.2736 | 493.5381 | 448.5784 | 434.8694 | 392.7159 | 407.0946 | 536.3804 | 546.7673 | 555.2459 | -0.13844 | 0.30359  | -0.29129 | 0.02476  | 0.115509 | 0.628866 |
| AT1G67740 | PSB5      | 6009.909 | 6937.149 | 6608.242 | 3091.88  | 2645.232 | 2556.897 | 2823.539 | 2695.067 | 2708.106 | 8906.41  | 11559.27 | 5403.288 | -1.19743 | 8.49E-09 | -1.209   | 6.51E-09 | 0.390799 | 0.255181 |
| AT1G67750 | AT1G67750 | 331.7042 | 215.8938 | 301.3111 | 169.5028 | 169.5916 | 155.5072 | 129.8383 | 137.019  | 112.2683 | 308.0109 | 288.6825 | 283.8384 | -0.77072 | 6.47E-06 | -1.1487  | 4.23E-11 | 0.041738 | 0.92514  |
| AT1G67760 | AT1G67760 | 4.755616 | 3.568492 | 2.575309 | 4.356571 | 3.312336 | 1.993682 | 1.778607 | 0        | 2.928738 | 1.919071 | 1.330334 | 6.215439 | -0.03291 | 0.96922  | -0.61374 | 0.411581 | -0.1     | NA       |
| AT1G67770 | TEL2      | 1.188904 | 1.784246 | 0        | 1.237247 | 0        | 0        | 2.66791  | 0        | 0.976246 | 1.919071 | 1.330334 | 0        | -0.24608 | 0.726699 | 0.130745 | 0.866696 | -0.08203 | NA       |
| AT1G67775 | CLE8      | 0        | 0        | 0        | 0        | 0        | 0        | 0        | 0        | 0        | 0        | 0        | 0        | #N/A     | #N/A     | #N/A     | #N/A     | #N/A     | #N/A     |
| AT1G67780 | AT1G67780 | 16.64466 | 14.27397 | 16.73951 | 14.84696 | 13.24935 | 11.96209 | 16.00746 | 22.65669 | 2.928738 | 22.06932 | 13.30334 | 21.75404 | -0.20699 | 0.722437 | -0.17818 | 0.781027 | 0.228648 | NA       |
| AT1G67785 | AT1G67785 | 120.0793 | 155.2294 | 189.2852 | 291.1654 | 270.2866 | 221.2987 | 139.6206 | 146.729  | 374.8785 | 216.8551 | 263.4061 | 199.93   | 0.702159 | 0.032727 | 0.472771 | 0.192499 | 0.509132 | 0.326787 |
| AT1G67790 | AT1G67790 | 1.188904 | 0        | 2.575309 | 0.412416 | 0.662467 | 1.993682 | 0.889303 | 2.15778  | 1.952492 | 2.878607 | 0        | 0        | -0.19287 | 0.804265 | 0.130939 | 0.876375 | -0.12185 | NA       |
| AT1G67792 | AT1G67792 | 46.36725 | 33.90067 | 38.62963 | 16.49662 | 25.17376 | 33.89259 | 32.90423 | 25.89336 | 25.3824  | 25.90746 | 27.93701 | 34.18492 | -0.66814 | 0.053665 | -0.46568 | 0.230381 | -0.41036 | 0.499839 |
| AT1G67800 | AT1G67800 | 183.0912 | 214.1095 | 191.8605 | 242.5004 | 259.0247 | 237.2481 | 336.1567 | 294.537  | 246.014  | 129.5373 | 130.3727 | 147.0987 | 0.328123 | 0.063778 | 0.571149 | 0.000817 | -0.51399 | 0.301113 |
| AT1G67810 | SUF2E     | 5.94452  | 16.05821 | 12.87654 | 26.3946  | 23.18635 | 25.91786 | 44.46517 | 43.1556  | 63.45599 | 4.797678 | 3.991002 | 8.287252 | 1.024286 | 0.011871 | 1.95761  | 2.65E-07 | -0.73502 | 0.334202 |
| AT1G67820 | AT1G67820 | 17.83356 | 12.48972 | 18.02716 | 17.32145 | 14.54728 | 23.92418 | 14.22886 | 15.10446 | 7.809968 | 21.10978 | 14.63367 | 23.82585 | 0.140519 |          |          |          |          |          |

|           |           |          |          |          |          |          |          |          |          |          |          |          |          |          |          |          |          |           |          |
|-----------|-----------|----------|----------|----------|----------|----------|----------|----------|----------|----------|----------|----------|----------|----------|----------|----------|----------|-----------|----------|
| AT1G68290 | END02     | 16.64466 | 33.90067 | 25.75309 | 60.21267 | 54.98478 | 42.86415 | 54.24751 | 59.33895 | 56.62227 | 25.90746 | 29.26735 | 33.14901 | 1.037924 | 0.000607 | 1.115714 | 0.000323 | 0.223001  | 0.744093 |
| AT1G68300 | AT1G68300 | 202.1127 | 208.7568 | 256.2432 | 393.032  | 433.2536 | 350.888  | 366.393  | 323.667  | 575.9851 | 265.7914 | 296.6645 | 284.8743 | 0.793161 | 0.000210 | 0.893809 | 2.93E-05 | 0.303431  | 0.367918 |
| AT1G68310 | AE7       | 150.9908 | 124.8972 | 153.2039 | 258.5846 | 278.8987 | 222.2955 | 209.8756 | 193.1213 | 314.3152 | 169.8378 | 145.0064 | 170.9246 | 0.795641 | 0.000142 | 0.717122 | 0.001049 | 0.168618  | 0.700947 |
| AT1G68320 | MYB62     | 3.566712 | 0        | 2.575309 | 12.37247 | 6.24673  | 10.96525 | 8.893035 | 3.23667  | 10.73871 | 1.919071 | 2.660668 | 1.035907 | 1.44294  | 0.014415 | 1.111737 | 0.083246 | -0.17098  | NA       |
| AT1G68330 | AT1G68330 | 49.93397 | 37.46917 | 56.65679 | 25.15735 | 48.36011 | 31.8989  | 39.12935 | 43.1556  | 51.74104 | 47.01725 | 55.87403 | 50.75942 | -0.45027 | 0.173973 | -0.11303 | 0.789489 | 0.068386  | 0.930587 |
| AT1G68340 | AT1G68340 | 40.42273 | 46.3904  | 39.91728 | 49.48987 | 64.25933 | 38.87679 | 50.6903  | 50.70783 | 72.2422  | 46.05771 | 31.92802 | 37.29264 | 0.27249  | 0.420094 | 0.436403 | 0.194499 | -0.10854  | 0.87994  |
| AT1G68350 | AT1G68350 | 2.377808 | 0        | 1.287654 | 1.237247 | 1.987402 | 4.984204 | 0.889303 | 4.31556  | 2.928738 | 1.919071 | 3.991002 | 3.10772  | 0.386994 | 0.607178 | 0.428233 | 0.585451 | 0.510655  | NA       |
| AT1G68360 | AT1G68360 | 8.322328 | 5.327338 | 6.438272 | 11.13522 | 12.58688 | 15.94945 | 8.003731 | 8.63112  | 17.14945 | 14.39303 | 7.982004 | 8.287552 | 0.350765 | 0.14999  | 0.350765 | 0.578714 | 0.464482  | NA       |
| AT1G68370 | ATI15     | 455.3502 | 431.7875 | 391.4469 | 500.6725 | 505.4625 | 545.2719 | 483.7811 | 470.396  | 462.7406 | 436.5887 | 480.2506 | 423.6588 | 0.273165 | 0.0317   | 0.146783 | 0.31992  | 0.06458   | 0.817029 |
| AT1G68380 | AT1G68380 | 0        | 0        | 0        | 0.412416 | 0        | 0        | 1.993682 | 0        | 0        | 0        | 0        | 0        | 0.374519 | NA       | 0        | NA       | 0         | NA       |
| AT1G68390 | AT1G68390 | 5.94452  | 7.136984 | 5.150617 | 9.073143 | 7.949607 | 6.977885 | 16.00746 | 12.94668 | 17.57243 | 8.635821 | 7.982004 | 10.35907 | 0.313822 | 0.599021 | 1.118205 | 0.030296 | 0.44111   | NA       |
| AT1G68400 | AT1G68400 | 180.7134 | 173.0719 | 132.6284 | 86.19486 | 77.50867 | 81.74094 | 81.81592 | 92.78453 | 101.5296 | 149.6876 | 148.9974 | 123.2729 | -0.95514 | 4.52E-07 | -0.79464 | 6.65E-05 | -0.1988   | 0.588209 |
| AT1G68410 | AT1G68410 | 189.0357 | 239.089  | 271.6951 | 239.201  | 233.1885 | 297.0586 | 199.204  | 242.7502 | 192.3205 | 245.6411 | 232.8084 | 210.289  | 0.130264 | 0.559257 | -0.13783 | 0.562828 | -0.01945  | 0.970941 |
| AT1G68420 | AT1G68420 | 0        | 0        | 0        | 0        | 0        | 0        | 0        | 0        | 0        | 0        | 0        | 0        | #N/A     | #N/A     | #N/A     | #N/A     | #N/A      | #N/A     |
| AT1G68430 | AT1G68430 | 9.511232 | 10.70548 | 7.725926 | 8.660727 | 4.637271 | 1.993682 | 0.889303 | 4.31556  | 10.73871 | 9.595356 | 9.312338 | 16.5745  | -0.55725 | 0.37778  | -0.57485 | 0.394634 | 0.826277  | NA       |
| AT1G68440 | AT1G68440 | 305.5483 | 272.9896 | 305.1741 | 286.6288 | 281.5486 | 323.9733 | 196.5361 | 227.6458 | 308.4937 | 288.8202 | 231.4781 | 253.7971 | 0.007666 | 0.976282 | -0.26796 | 0.211002 | -0.18609  | 0.595848 |
| AT1G68450 | VQ8       | 0        | 0        | 0        | 4.536571 | 3.312336 | 2.990522 | 10.07164 | 1.07889  | 8.909968 | 0        | 0        | 0        | 1.3155   | 0.037586 | 1.864099 | 0.002653 | 0         | NA       |
| AT1G68460 | IPT1      | 3.566712 | 5.352738 | 3.862963 | 1.237247 | 1.324935 | 0.996841 | 0.889303 | 0        | 2.928738 | 2.878607 | 2.660668 | 4.143626 | -0.99102 | 0.136068 | -0.89582 | 0.205319 | -0.21097  | NA       |
| AT1G68470 | AT1G68470 | 33.28931 | 44.60615 | 50.21852 | 42.89122 | 51.00998 | 45.85468 | 30.23632 | 30.20892 | 28.31113 | 44.13864 | 47.89202 | 30.04129 | 0.125599 | 0.728677 | -0.48747 | 0.154247 | -0.06551  | 0.931624 |
| AT1G68480 | JAG       | 2.377808 | 1.784246 | 1.287654 | 4.948987 | 4.637271 | 5.981045 | 3.572124 | 5.39445  | 4.88123  | 6.716749 | 1.330334 | 2.071813 | 0.850961 | 0.192252 | 0.716866 | 0.312781 | 0.46431   | NA       |
| AT1G68490 | AT1G68490 | 600.3965 | 565.606  | 606.4852 | 586.8674 | 726.0641 | 579.1645 | 592.2761 | 459.6071 | 714.6121 | 571.8832 | 643.8816 | 575.964  | 0.091789 | 0.670631 | -0.00475 | 0.985039 | 0.013148  | 0.979708 |
| AT1G68500 | AT1G68500 | 4.755616 | 1.784246 | 5.150617 | 8.660727 | 14.57428 | 7.974726 | 7.114428 | 8.63112  | 28.31113 | 11.51443 | 6.65167  | 6.215493 | 0.913775 | 0.121578 | 1.303621 | 0.0255   | 0.645657  | NA       |
| AT1G68510 | LBD42     | 0        | 0        | 0        | 0.824831 | 1.324935 | 0        | 0        | 0        | 0        | 0        | 1.330334 | 0        | 0.394519 | NA       | 0        | NA       | 0         | 0.194136 |
| AT1G68520 | COL6      | 1342.273 | 1475.571 | 1068.753 | 1136.205 | 1105.658 | 1145.37  | 1186.331 | 1507.209 | 1762.124 | 1076.599 | 996.4201 | 1082.522 | -0.19342 | 0.304205 | 0.194592 | 0.324734 | -0.29313  | 0.274581 |
| AT1G68526 | AT1G68526 | 0        | 0        | 1.287654 | 0.824831 | 1.987402 | 0.996841 | 0        | 1.07889  | 0        | 0        | 1.330334 | 0        | 0.425177 | NA       | -0.07838 | NA       | -0.04022  | NA       |
| AT1G68530 | TUT1      | 2740.424 | 3575.629 | 2830.264 | 2462.533 | 2400.119 | 2543.938 | 2421.573 | 2739.302 | 2788.159 | 2870.931 | 2814.987 | 2744.116 | -0.29982 | 0.021628 | -0.1989  | 0.165563 | -0.11481  | 0.636505 |
| AT1G68540 | KPR2      | 83.22328 | 82.07532 | 92.71111 | 65.16166 | 52.99738 | 58.81361 | 146.7351 | 105.7312 | 122.0307 | 157.3638 | 147.6671 | 158.4937 | -0.22303 | 0.01787  | -0.35459 | 0.017172 | 0.821664  | 0.000805 |
| AT1G68550 | ERF118    | 1.188904 | 3.568492 | 0        | 0.412416 | 0.662467 | 0.996841 | 0        | 2.15778  | 0        | 0.959536 | 0        | 0        | -0.33644 | 0.615708 | -0.31522 | 0.651463 | -0.48833  | NA       |
| AT1G68552 | CPuORF53  | 0        | 0        | 0        | 0        | 0        | 0        | 0        | 0        | 0        | 0        | 0        | 0        | #N/A     | #N/A     | #N/A     | #N/A     | #N/A      | #N/A     |
| AT1G68560 | XYL1      | 3741.481 | 3192.016 | 2848.291 | 1242.196 | 1234.839 | 1407.539 | 1573.178 | 1642.07  | 1461.44  | 2130.169 | 2140.507 | 2433.344 | -1.31826 | 2.14E-26 | -1.05249 | 5.11E-17 | -0.53885  | 0.000608 |
| AT1G68568 | AT1G68568 | 0        | 0        | 0        | 0.412416 | 0        | 0        | 0        | 0        | 0        | 0        | 0        | 0        | 0.095918 | NA       | 0        | NA       | 0         | 0.59748  |
| AT1G68570 | NPF3.1    | 214.0027 | 194.4828 | 199.5864 | 334.469  | 292.8105 | 285.0965 | 175.1928 | 202.8313 | 162.0568 | 181.3522 | 178.2648 | 156.4219 | 0.579147 | 0.000232 | -0.17384 | 0.388176 | -0.23653  | 0.414989 |
| AT1G68580 | AT1G68580 | 601.5854 | 520.9998 | 516.3244 | 559.2355 | 522.0242 | 637.9781 | 626.6097 | 668.9118 | 547.674  | 474.0106 | 486.9022 | 585.2872 | 0.063157 | 0.742928 | 0.164075 | 0.363399 | -0.08415  | 0.79786  |
| AT1G68585 | AT1G68585 | 104.6235 | 73.15409 | 91.42346 | 185.1746 | 218.6142 | 145.5388 | 132.5062 | 84.15342 | 131.7932 | 104.5894 | 146.3367 | 109.8061 | 0.980473 | 5.13E-05 | 0.34633  | 0.236949 | 0.327722  | 0.368214 |
| AT1G68590 | AT1G68590 | 1834.479 | 2176.78  | 2172.273 | 1558.518 | 1682.667 | 1614.882 | 1671.891 | 1726.224 | 1837.295 | 2971.682 | 3764.845 | 2313.179 | -0.34168 | 0.054401 | -0.23508 | 0.22821  | 0.538968  | 0.012263 |
| AT1G68600 | ALMT5     | 428.0054 | 503.1574 | 553.6914 | 65.16166 | 82.14594 | 75.7599  | 183.1965 | 180.1746 | 182.558  | 343.0972 | 603.9716 | 587.359  | -2.69491 | 5.61E-72 | -1.41905 | 1.37E-22 | 0.222508  | 0.364594 |
| AT1G68610 | PCR11     | 0        | 0        | 0        | 0.412416 | 0        | 0        | 0        | 0        | 0.959536 | 1.330334 | 1.035907 | 0        | 0.065724 | NA       | 0        | NA       | 0         | 0.59748  |
| AT1G68620 | CXE6      | 7.133424 | 14.27397 | 16.73951 | 94.44317 | 83.47088 | 104.6683 | 91.59826 | 97.10009 | 98.60085 | 17.27164 | 13.30334 | 3.323159 | 2.671352 | 3.22E-18 | 2.694589 | 3.47E-18 | 0.055687  | 0.959177 |
| AT1G68630 | PCR12     | 1.188904 | 0        | 0        | 0.824831 | 0        | 2.990522 | 2.66791  | 0        | 0        | 1.330334 | 1.035907 | 0        | 1.036904 | 0.637171 | 0.194622 | 0.783801 | 0.126166  | NA       |
| AT1G68640 | PAN       | 5.94452  | 0        | 11.58889 | 15.25938 | 7.28714  | 10.96525 | 11.56095 | 11.86779 | 0.976246 | 15.35257 | 15.96401 | 10.35907 | 0.613988 | 0.352826 | 0.255978 | 0.734251 | 0.833604  | NA       |
| AT1G68650 | AT1G68650 | 136.724  | 76.72258 | 140.3543 | 204.9705 | 236.5008 | 201.3618 | 146.7351 | 159.6751 | 144.4844 | 140.9922 | 142.3457 | 120.1652 | 0.815778 | 4.39E-05 | 0.314239 | 0.18913  | -0.154789 | 0.720829 |
| AT1G68660 | AT1G68660 | 533.8179 | 617.3491 | 687.6074 | 693.2706 | 673.0667 | 599.1013 | 782.5871 | 860.9542 | 1016.272 | 664.9582 | 639.8906 | 698.201  | 0.097923 | 0.587157 | 0.525522 | 0.000422 | 0.123097  | 0.679106 |
| AT1G68670 | AT1G68670 | 439.8945 | 476.3937 | 485.4457 | 449.1206 | 412.0546 | 453.5628 | 438.4266 | 456.3704 | 450.0494 | 474.0106 | 504.1966 | 462.0143 | -0.09042 | 0.518989 | -0.05792 | 0.174786 | 0.038664  | 0.892726 |
| AT1G68680 | AT1G68680 | 70.14533 | 66.0171  | 88.84815 | 164.5538 | 162.3045 | 100.6809 | 93.37687 | 92.78453 | 167.9143 | 113.2252 | 111.7481 | 133.6319 | 0.879449 | 0.001661 | 0.610136 | 0.054455 | 0.628352  | 0.13423  |
| AT1G68690 | PERK9     | 42.80054 | 53.52738 | 25.75309 | 93.20593 | 82.14594 | 103.6714 | 87.15174 | 111.1257 | 58.57476 | 35.50282 | 39.91002 | 37.29264 | 1.140065 | 7.63E-05 | 1.024637 | 0.000644 | -0.09262  | 0.903727 |
| AT1G68700 | AT1G68700 | 0        | 1.784246 | 1.287654 | 4.215256 | 5.962205 | 5.981045 | 4.446517 | 4.31556  | 5.87476  | 0        | 1.330334 | 7.251346 | 1.144401 | 0.076504 | 1.046532 | 0.125774 | 0.580908  | NA       |
| AT1G68710 | ALA9      | 184.2801 | 137.3869 | 131.3407 | 105.9908 | 82.14594 | 141.5514 | 150.2923 | 107.889  | 69.31347 | 161.202  | 191.5681 | 130.5242 | -0.44495 | 0.148091 | -0.44243 | 0.174228 | 0.082036  | 0.905042 |
| AT1G68720 | TADA      | 685.9976 | 595.9382 | 499.6099 | 342.3042 | 418.6731 | 404.6331 | 440.1871 | 328.0187 | 571.8832 | 548.0976 | 500.3429 | 0        | -0.71076 | 2.96E-05 | -0.59202 | 0.000816 | -0.13457  | 0.69113  |
| AT1G68725 | AGP19     | 27.34479 | 19.62671 | 15.45185 | 27.63184 | 14.57428 | 13.95577 | 9.782338 | 14.02557 | 16.59618 | 20.15025 | 23.94601 | 11.39497 | -0.09705 | 0.861187 | -0.54999 | 0.27857  | -0.16563  | 0.869018 |
| AT1G68730 | AT1G68730 | 40.42273 | 62.44861 | 74.68395 | 81.65828 | 95.39529 | 65.79149 | 88.04104 | 75.5223  | 108.3633 | 64.28889 | 66.5167  | 116.0215 | 0.435116 | 0.180027 | 0.583602 | 0.074303 | 0.453801  | 0.368214 |
| AT1G68735 | AT1G68735 | 0        | 0        | 0        | 0.662467 | 0        | 0        | 0        | 0        | 0        | 1.330334 | 0        | 0        | 0.101524 | NA       | 0        | NA       | 0         | 0.719327 |
| AT1G68740 | PHO1.1    | 89.1678  | 78.50683 | 121.0395 | 32.16841 | 26.49869 | 34.88943 | 23.21189 | 34.52448 | 20.50117 |          |          |          |          |          |          |          |           |          |



|           |           |          |           |          |          |          |          |          |          |          |          |          |          |          |          |          |          |           |          |
|-----------|-----------|----------|-----------|----------|----------|----------|----------|----------|----------|----------|----------|----------|----------|----------|----------|----------|----------|-----------|----------|
| AT1G69180 | CRC       | 19.02246 | 8.92123   | 2.575309 | 4.124156 | 3.312336 | 2.990522 | 4.446517 | 1.07889  | 2.928738 | 12.47396 | 6.65167  | 7.251346 | -1.09753 | 0.064479 | -1.23934 | 0.045716 | -0.15165  | NA       |
| AT1G69190 | YHPK/DHP  | 0        | 0         | 0        | 0.412416 | 0        | 0        | 0        | 0.976246 | 0        | 0        | 0        | 0        | 0.065752 | NA       | 0.143461 | 0        | 0.71588   | NA       |
| AT1G69200 | FLN2      | 549.2736 | 487.0992  | 521.5    | 403.3424 | 349.7827 | 407.7079 | 478.4453 | 503.8416 | 456.8831 | 502.7967 | 662.5063 | 614.2926 | -0.42179 | 0.003826 | -0.11569 | 0.522772 | 0.183891  | 0.475158 |
| AT1G69210 | AT1G69210 | 30.9115  | 19.62671  | 19.31482 | 41.65397 | 47.03518 | 48.8452  | 27.56841 | 33.44559 | 28.31113 | 23.98839 | 22.61568 | 25.89766 | 0.883273 | 0.005437 | 0.296052 | 0.468526 | 0.027074  | 0.978296 |
| AT1G69220 | SIK1      | 410.1719 | 426.4348  | 412.0494 | 359.214  | 297.4478 | 366.8374 | 328.153  | 380.8481 | 252.8477 | 364.6235 | 339.2352 | 32.73408 | -0.28137 | 0.117911 | -0.36983 | 0.034474 | -0.26916  | 0.334472 |
| AT1G69230 | SP12      | 11.88904 | 7.136984  | 10.10293 | 10.7228  | 7.949607 | 8.971567 | 2.66791  | 10.7889  | 4.88123  | 12.47396 | 15.96401 | 12.43068 | -0.07756 | 0.906224 | -0.58002 | 0.042776 | 0.369373  | NA       |
| AT1G69240 | MES15     | 0        | 1.784246  | 0        | 0        | 0        | 0        | 0        | 0        | 0        | 0        | 1.330334 | 0        | -0.27254 | NA       | -0.25305 | NA       | -0.03925  | NA       |
| AT1G69250 | AT1G69250 | 168.8244 | 167.7191  | 151.9432 | 215.6933 | 229.8761 | 189.3997 | 190.3109 | 209.3046 | 203.0592 | 132.4159 | 130.3727 | 167.8169 | 0.378651 | 0.0313   | 0.297219 | 0.12404  | -0.17356  | 0.607892 |
| AT1G69252 | AT1G69252 | 562.3516 | 574.5272  | 621.937  | 356.3271 | 443.1906 | 368.8311 | 513.1281 | 431.556  | 520.3391 | 629.4554 | 594.6593 | 614.2926 | -0.58374 | 1.62E-05 | -0.25924 | 0.091641 | 0.063564  | 0.842019 |
| AT1G69260 | AFP1      | 67.76752 | 58.88012  | 46.35556 | 41.65397 | 45.71024 | 55.82308 | 60.47264 | 49.62894 | 37.09735 | 39.34096 | 42.57069 | 49.72351 | -0.27887 | 0.374569 | -0.21754 | 0.535641 | -0.37337  | 0.458325 |
| AT1G69270 | RPK1      | 128.4016 | 135.6027  | 136.4914 | 173.2145 | 167.6042 | 237.2481 | 255.2301 | 303.1681 | 226.4891 | 125.6992 | 127.7121 | 129.4883 | 0.504299 | 0.01194  | 0.946347 | 6.75E-07 | -0.06247  | 0.899414 |
| AT1G69280 | AT1G69280 | 32.10041 | 14.27397  | 16.73951 | 31.756   | 34.4483  | 28.90838 | 36.46144 | 29.13003 | 49.78855 | 21.10978 | 30.59768 | 37.29264 | 0.498818 | 0.207886 | 0.753285 | 0.055462 | 0.399348  | 0.561641 |
| AT1G69290 | AT1G69290 | 19.02246 | 30.33218  | 30.9037  | 25.15735 | 14.57428 | 18.93997 | 29.34701 | 25.89336 | 19.52492 | 23.98839 | 30.59768 | 30.04129 | -0.37169 | 0.363269 | -0.07379 | 0.887081 | 0.080092  | 0.931292 |
| AT1G69295 | PDC84     | 140.2907 | 110.6233  | 124.9025 | 116.3012 | 107.3197 | 84.73147 | 76.4801  | 101.4157 | 94.69586 | 129.5373 | 135.6941 | 81.83662 | -0.26884 | 0.30668  | -0.45579 | 0.082883 | -0.12166  | 0.817029 |
| AT1G69300 | AT1G69300 | 0        | 0         | 0        | 0        | 0        | 0        | 0        | 0        | 0        | 0        | 0        | 0        | #N/A     | #N/A     | #N/A     | #N/A     | #N/A      | #N/A     |
| AT1G69310 | WRKY57    | 36.85602 | 33.90067  | 50.21852 | 43.71605 | 41.07297 | 38.87679 | 40.90796 | 40.99782 | 29.28738 | 42.21957 | 58.53469 | 33.14901 | 0.027208 | 0.948207 | -0.12482 | 0.764899 | 0.110627  | 0.878139 |
| AT1G69320 | CLE10     | 5.94452  | 3.568492  | 3.862963 | 2.474493 | 3.312336 | 0        | 1.778607 | 1.07889  | 4.88123  | 3.838143 | 3.991002 | 5.179533 | -0.67435 | 0.325005 | -0.48078 | 0.526383 | -0.02688  | NA       |
| AT1G69325 | AT1G69325 | 1.188904 | 7.136984  | 6.438272 | 4.124156 | 3.974804 | 2.990522 | 5.335821 | 1.07889  | 2.928738 | 7.676285 | 5.321336 | 6.215439 | -0.22168 | 0.768128 | -0.36061 | 0.638049 | 0.329213  | NA       |
| AT1G69330 | AT1G69330 | 118.8904 | 137.3869  | 144.2173 | 91.14384 | 92.74542 | 88.71883 | 105.8271 | 90.62675 | 87.86214 | 133.3755 | 125.0514 | 121.2011 | -0.53625 | 0.004021 | -0.47485 | 0.018144 | -0.06944  | 0.748895 |
| AT1G69340 | AT1G69340 | 521.9288 | 576.3115  | 516.3494 | 513.4574 | 558.4599 | 575.1771 | 558.4826 | 535.1294 | 520.3391 | 455.7794 | 540.1156 | 502.4147 | 0.002805 | 0.862128 | 0.003263 | 0.985734 | -0.10646  | 0.66497  |
| AT1G69350 | PCMP-E66  | 11.88904 | 21.41095  | 20.60247 | 18.14629 | 17.88662 | 18.93997 | 16.00746 | 22.65669 | 17.1495  | 16.3121  | 21.28534 | 16.5794  | 0.046248 | 0.932364 | -0.07242 | 0.899772 | 0.017437  | 0.988216 |
| AT1G69360 | AT1G69360 | 238.9697 | 245.6275  | 213.7506 | 170.3276 | 159.6546 | 200.365  | 205.4291 | 264.328  | 170.843  | 223.5718 | 227.4871 | 227.8945 | -0.8739  | 0.400412 | -0.11674 | 0.627663 | -0.03199  | 0.994258 |
| AT1G69370 | CM3       | 154.5575 | 181.9931  | 141.642  | 144.3455 | 152.3675 | 169.4629 | 182.3072 | 190.9635 | 174.748  | 148.728  | 148.9974 | 158.4937 | -0.03539 | 0.874962 | 0.203154 | 0.307736 | -0.05516  | 0.894073 |
| AT1G69380 | AT1G69380 | 60.6341  | 85.64381  | 81.12222 | 98.56732 | 115.9318 | 105.6651 | 124.5025 | 133.7824 | 91.76712 | 79.64146 | 102.4357 | 99.44703 | 0.484622 | 0.042141 | 0.610869 | 0.011589 | 0.301772  | 0.471105 |
| AT1G69390 | MINE1     | 389.9605 | 399.6711  | 442.9531 | 414.8901 | 418.6793 | 361.8532 | 456.2127 | 412.136  | 611.13   | 448.1031 | 443.0012 | 497.2351 | -0.04111 | 0.854528 | 0.258561 | 0.176797 | 0.168471  | 0.597166 |
| AT1G69400 | BUB3.3    | 32.10041 | 28.54794  | 33.47901 | 32.16841 | 29.14856 | 31.8989  | 37.35075 | 42.07671 | 26.35864 | 23.02886 | 26.60668 | 32.1131  | -0.02016 | 0.963026 | 0.147172 | 0.792909 | -0.19775  | 0.778089 |
| AT1G69410 | ELF5A-3   | 577.8073 | 544.195   | 705.6346 | 1087.54  | 1106.983 | 870.242  | 819.9378 | 688.3318 | 1052.393 | 761.8713 | 858.0654 | 791.4326 | 0.729186 | 4.07E-05 | 0.474216 | 0.01294  | 0.38826   | 0.156384 |
| AT1G69420 | PAT22     | 935.6674 | 744.0306  | 736.5383 | 471.8034 | 448.4903 | 506.3951 | 487.3383 | 558.865  | 480.313  | 779.1429 | 744.987  | 762.4272 | -0.75568 | 6.47E-09 | -0.65817 | 8.32E-07 | -0.08085  | 0.781222 |
| AT1G69430 | AT1G69430 | 14.26685 | 21.41095  | 12.87654 | 8.660727 | 9.27452  | 9.968408 | 4.21888  | 9.710009 | 8.786214 | 13.4335  | 10.64267 | 11.39497 | -0.6715  | 0.150844 | -0.44814 | 0.400547 | -0.35004  | NA       |
| AT1G69440 | AGO7      | 164.0687 | 99.97179  | 109.4506 | 47.42779 | 42.39791 | 42.86415 | 43.57587 | 53.9445  | 34.16861 | 88.27738 | 78.4897  | 104.6266 | -1.43272 | 3.32E-09 | -1.45005 | 9.46E-09 | -0.44923  | 0.257545 |
| AT1G69450 | AT1G69450 | 391.1494 | 415.7293  | 405.6111 | 400.0431 | 383.8835 | 453.5626 | 540.6965 | 488.7371 | 241.1328 | 462.062  | 478.9202 | 380.1777 | -0.02981 | 0.931715 | 0.065405 | 0.852023 | 0.119018  | 0.833777 |
| AT1G69460 | AT1G69460 | 571.8628 | 574.5272  | 612.9233 | 731.2128 | 677.0146 | 645.9528 | 569.1542 | 497.0271 | 777.0191 | 545.0162 | 502.8662 | 615.3285 | 0.220091 | 0.263545 | 0.052319 | 0.833998 | -0.07851  | 0.849621 |
| AT1G69470 | AT1G69470 | 0        | 0         | 0        | 0        | 0        | 0        | 0        | 0        | 0        | 0        | 0        | 0        | 0        | NA       | 0        | NA       | 0         | NA       |
| AT1G69480 | PHO1-H10  | 8.322328 | 0         | 7.725926 | 34.23049 | 21.19895 | 33.89259 | 29.34701 | 23.73558 | 13.66744 | 14.39303 | 6.65167  | 10.35907 | 1.902195 | 3.29E-05 | 1.518896 | 0.001787 | 0.615451  | 0.487822 |
| AT1G69485 | AT1G69485 | 5.94452  | 5.327328  | 2.575309 | 5.737818 | 4.637271 | 4.984204 | 3.557214 | 4.31556  | 4.88123  | 3.838143 | 1.330334 | 2.071813 | 0.147274 | 0.845811 | -0.07413 | 0.930247 | -0.53781  | 0.316408 |
| AT1G69490 | NAC029    | 238.9697 | 255.1472  | 227.9148 | 351.3781 | 332.5586 | 235.2544 | 181.4179 | 161.8335 | 136.6744 | 186.1499 | 191.5681 | 198.8941 | 0.353128 | 0.072807 | -0.57407 | 0.004143 | -0.31401  | 0.316408 |
| AT1G69500 | CYP704B1  | 11.88904 | 12.48972  | 12.87654 | 2.474493 | 1.324935 | 0        | 0        | 0        | 0        | 20.15025 | 15.96401 | 24.86176 | -0.27349 | 4.25E-05 | -0.76306 | 8.29E-07 | 0.679871  | NA       |
| AT1G69510 | AT1G69510 | 548.0847 | 503.15274 | 637.3889 | 665.6387 | 581.6463 | 561.2214 | 517.5746 | 466.0805 | 60.3438  | 61.6749  | 635.8996 | 647.4164 | 0.097704 | 0.584403 | -0.0915  | 0.63577  | 0.20582   | 0.419352 |
| AT1G69520 | AT1G69520 | 15.45575 | 19.62671  | 20.20027 | 49.89066 | 91.42048 | 94.69987 | 55.02339 | 55.66462 | 13.4335  | 6.65167  | 15.5386  | 2.18179  | 3E-14    | 1.577895 | 2.28E-07 | -0.5157  | 0.41884   |          |
| AT1G69523 | AT1G69523 | 99.86793 | 90.99655  | 137.779  | 42.89122 | 45.04777 | 39.87363 | 164.5211 | 138.0979 | 134.7219 | 209.1788 | 276.7095 | 202.0018 | -1.31344 | 2.9E-09  | 0.393194 | 0.10403  | 1.022198  | 0.000021 |
| AT1G69526 | AT1G69526 | 45.17835 | 41.03766  | 52.79383 | 23.09527 | 21.19895 | 29.90522 | 10.03358 | 52.86561 | 66.38475 | 62.52006 | 74.4987  | 61.11849 | -0.89278 | 0.00164  | 0.436742 | 0.150584 | 0.132176  | 0.119122 |
| AT1G69530 | EXPA1     | 2194.717 | 2563.962  | 2152.958 | 3668.437 | 3189.78  | 2403.383 | 1767.935 | 1582.732 | 1486.823 | 1424.91  | 1609.704 | 1626.373 | 0.416662 | 0.01389  | -0.50437 | 0.003021 | -0.55744  | 0.007405 |
| AT1G69540 | AGL94     | 5.94452  | 10.70548  | 7.725926 | 2.886909 | 3.974804 | 2.990522 | 0.889303 | 0        | 3.904984 | 3.838143 | 5.321336 | 11.39497 | -0.89386 | 0.149744 | -1.39347 | 0.026757 | -0.14117  | NA       |
| AT1G69543 | AT1G69543 | 0        | 0         | 0        | 0        | 0        | 0        | 0        | 0        | 0        | 0        | 0        | 0        | #N/A     | #N/A     | #N/A     | #N/A     | #N/A      | #N/A     |
| AT1G69550 | AT1G69550 | 564.7294 | 522.7841  | 504.7605 | 374.8858 | 323.284  | 520.3509 | 511.3495 | 520.025  | 310.4462 | 476.8892 | 537.4549 | 444.4039 | -0.37802 | 0.109892 | -0.23924 | 0.366973 | -0.12355  | 0.79524  |
| AT1G69560 | MYB105    | 0        | 1.784246  | 3.862963 | 0.412416 | 0        | 0.996841 | 1.778607 | 1.07889  | 0        | 0.95536  | 5.321336 | 0        | -0.61299 | 0.355606 | -0.3151  | 0.657857 | -0.048684 | NA       |
| AT1G69570 | CD5       | 16.64466 | 12.48972  | 18.02716 | 7.835968 | 12.58688 | 18.93997 | 15.11816 | 14.02557 | 4.88123  | 21.10978 | 17.29434 | 14.50269 | -0.29133 | 0.590873 | -0.40554 | 0.475356 | 0.133948  | NA       |
| AT1G69572 | AT1G69572 | 0        | 0         | 0        | 0        | 0        | 0        | 0        | 0        | 0        | 0        | 0        | 0        | #N/A     | #N/A     | #N/A     | #N/A     | #N/A      | #N/A     |
| AT1G69580 | AT1G69580 | 117.7015 | 53.52738  | 93.99877 | 66.81132 | 71.54647 | 82.73778 | 80.92662 | 66.89118 | 91.76712 | 105.5489 | 101.1054 | 154.3501 | -0.28083 | 0.368534 | -0.15907 | 0.658559 | 0.404808  | 0.374513 |
| AT1G69587 | AT1G69587 | 19.02246 | 23.1952   | 30.9037  | 34.64291 | 26.49869 | 17.94313 | 30.23632 | 25.89336 | 32.71612 | 32.62421 | 25.27635 | 22.78994 | 0.142756 | 0.753111 | 0.250571 | 0.582586 | 0.134229  | 0.895748 |
| AT1G69588 | CLE45     | 19.02246 | 28.54794  | 28.3284  | 9.897974 | 16.56168 | 12.95889 | 10.67164 | 15.10446 | 10.2886  | 23.94601 | 23.94601 | 27.96489 | -0.85577 | 0.029276 | -0.9     |          |           |          |

|           |           |           |          |          |          |          |          |          |          |          |          |          |           |           |           |           |           |           |          |
|-----------|-----------|-----------|----------|----------|----------|----------|----------|----------|----------|----------|----------|----------|-----------|-----------|-----------|-----------|-----------|-----------|----------|
| AT1G70050 | AT1G70050 | 0         | 0        | 0        | 0.412416 | 0        | 0        | 0        | 0        | 0        | 0        | 0        | 0         | 0.095918  | NA        | 0         | NA        | 0         | NA       |
| AT1G70060 | SNL4      | 552.8403  | 510.2944 | 508.6235 | 359.6264 | 367.6693 | 434.6226 | 435.7587 | 505.9994 | 296.7788 | 406.8431 | 424.3765 | 446.4757  | -0.43015  | 0.024417  | -0.33753  | 0.100857  | -0.29279  | 0.3382   |
| AT1G70070 | ISE2      | 784.6766  | 617.3491 | 628.3753 | 393.1254 | 290.1607 | 376.8058 | 392.1828 | 456.3704 | 333.8761 | 516.2302 | 542.7763 | 535.5637  | -1.05425  | 0.272111  | -0.76906  | 2.61E-06  | -34506    | 0.172225 |
| AT1G70080 | TPS06     | 0         | 0        | 0        | 0.412416 | 0        | 0.996841 | 1.778607 | 2.15778  | 1.952492 | 0        | 1.330334 | 0         | 0.186663  | NA        | 0.944951  | NA        | 0.193325  | NA       |
| AT1G70090 | GAT19     | 589.6964  | 628.0546 | 526.6506 | 588.9294 | 676.3791 | 753.6116 | 660.7525 | 755.223  | 1017.248 | 597.7907 | 525.4819 | 552.1382  | 0.205112  | 0.308737  | 0.071251  | 0.011547  | -0.05454  | 0.899829 |
| AT1G70100 | AT1G70100 | 438.7056  | 428.2121 | 481.5827 | 366.225  | 396.1554 | 428.6415 | 458.8806 | 474.7116 | 350.4723 | 501.8371 | 510.8482 | 478.5888  | -0.18249  | 0.2575821 | -0.471129 | 0.172383  | -0.141054 | 0.622829 |
| AT1G70110 | LECRK51   | 1.188904  | 5.352738 | 1.287654 | 0.824831 | 1.987402 | 0.996841 | 1.778607 | 2.15778  | 0        | 1.919071 | 1.330334 | 2.071813  | -0.43687  | 0.556815  | -0.39362  | 0.618881  | -0.19324  | NA       |
| AT1G70120 | AT1G70120 | 0         | 0        | 0        | 0        | 0        | 0        | 0        | 0        | 0        | 0        | 0        | 0         | #N/A      | #N/A      | #N/A      | #N/A      | #N/A      | #N/A     |
| AT1G70130 | LECRK52   | 0         | 0        | 0        | 0.824831 | 0.662467 | 1.993682 | 3.557214 | 3.23667  | 1.952492 | 0.995936 | 0        | 0         | 0.538391  | 0.419412  | 1.243471  | 0.043685  | 0.14416   | NA       |
| AT1G70140 | FH8       | 10.70014  | 16.05821 | 12.87654 | 40.00431 | 37.76063 | 37.87995 | 38.24005 | 33.44559 | 41.97858 | 27.82653 | 23.94601 | 20.71813  | 1.417231  | 3.71E-05  | 1.387578  | 0.000098  | 0.780512  | 0.166414 |
| AT1G70150 | AT1G70150 | 45.17835  | 44.60615 | 59.2321  | 92.38109 | 95.39529 | 80.7441  | 88.93035 | 81.99564 | 66.38473 | 63.2935  | 39.91002 | 58.01077  | 0.813829  | 0.001009  | 0.634456  | 0.018954  | 0.115925  | 0.850918 |
| AT1G70160 | AT1G70160 | 1061.691  | 1268.599 | 1064.89  | 1226.936 | 1044.711 | 1271.969 | 1171.213 | 1481.316 | 1098.277 | 899.0849 | 594.6593 | 1044.194  | 0.060926  | 0.819866  | 0.14053   | 0.585733  | -0.40504  | 0.193952 |
| AT1G70170 | MMP       | 0         | 1.784246 | 1.287654 | 8.248311 | 10.59948 | 6.977885 | 8.003731 | 2.15778  | 0.976246 | 0        | 0        | 0         | 1.764882  | 0.004205  | 0.870463  | 0.218776  | -0.51642  | NA       |
| AT1G70180 | AT1G70180 | 229.4585  | 210.541  | 227.9148 | 196.3098 | 179.5286 | 210.3334 | 163.6318 | 188.8057 | 134.7219 | 181.3522 | 179.5951 | 208.2172  | -0.19115  | 0.31481   | -0.45187  | 0.013067  | -0.22785  | 0.453276 |
| AT1G70185 | AT1G70185 | 0         | 0        | 0        | 0.412416 | 1.987402 | 0.996841 | 0        | 0        | 0        | 0        | 0        | 0         | 0.623164  | NA        | 0         | NA        | 0         | NA       |
| AT1G70190 | AT1G70190 | 224.7028  | 183.7773 | 256.2432 | 256.9349 | 319.9717 | 213.3239 | 232.9975 | 185.5691 | 374.8785 | 218.7741 | 214.1838 | 242.4021  | 0.237295  | 0.413374  | 0.241074  | 0.430255  | 0.018115  | 0.981052 |
| AT1G70200 | AT1G70200 | 1007.002  | 924.2394 | 938.7    | 578.6191 | 657.1675 | 652.9307 | 778.1405 | 780.0374 | 885.4551 | 929.79   | 916.6001 | 1074.235  | -0.60153  | 5E-07     | -0.23075  | 0.092368  | 0.024645  | 0.9394   |
| AT1G70209 | AT1G70209 | 0         | 0        | 0        | 0        | 0        | 0        | 0        | 0        | 0        | 0        | 0        | 0         | #N/A      | #N/A      | #N/A      | #N/A      | #N/A      | #N/A     |
| AT1G70210 | CYCD1-1   | 479.1283  | 342.5752 | 433.9395 | 253.6356 | 230.5386 | 243.2291 | 229.4403 | 210.3835 | 176.7005 | 407.8026 | 388.4575 | 392.6086  | -0.78013  | 4.09E-07  | -1.01395  | 8.55E-11  | -0.084    | 0.810178 |
| AT1G70220 | AT1G70220 | 1.188904  | 1.784246 | 0        | 1.237247 | 0.662467 | 1.993682 | 1.778607 | 2.15778  | 0.976246 | 0        | 0        | 0         | 0.053135  | 0.951199  | 0.499307  | 0.513324  | 0.876294  | NA       |
| AT1G70230 | XY4       | 254.4254  | 296.1848 | 251.0926 | 134.0351 | 135.1433 | 150.523  | 144.9565 | 132.7035 | 94.6555  | 231.2481 | 242.1208 | 290.0538  | -0.91319  | 3.03E-07  | -1.07308  | 4.46E-09  | -0.06307  | 0.888311 |
| AT1G70250 | AT1G70250 | 287.7148  | 244.4441 | 216.3259 | 316.3227 | 284.8609 | 297.0586 | 193.8682 | 10.3835  | 41.6957  | 165.9997 | 196.8894 | 169.8877  | 0.257758  | 0.1953    | -0.4483   | 0.024202  | -0.48518  | 0.066575 |
| AT1G70260 | AT1G70260 | 105.8125  | 85.64381 | 65.67037 | 22.27044 | 15.89921 | 10.96525 | 14.22886 | 17.26224 | 5.857476 | 94.03449 | 97.11438 | 100.4829  | -2.16562  | 1.06E-13  | -2.54406  | 1.87E-15  | 0.175768  | 0.769037 |
| AT1G70270 | AT1G70270 | 3.566712  | 1.784246 | 1.287654 | 0        | 0        | 0        | 0        | 0        | 0        | 0        | 0.991002 | 3.10772   | -1.12605  | 0.058019  | -0.10163  | 0.094829  | 0.0459    | NA       |
| AT1G70280 | AT1G70280 | 419.6831  | 408.5923 | 370.8445 | 239.201  | 205.3649 | 224.2892 | 222.3259 | 230.8824 | 223.5603 | 361.7449 | 340.5655 | 389.5009  | -0.82758  | 1.91E-10  | -0.81453  | 1.33E-09  | -0.1307   | 0.613392 |
| AT1G70290 | TPS8      | 1826.156  | 2010.845 | 1658.499 | 985.2608 | 916.1922 | 1511.211 | 1443.34  | 1944.16  | 1268.144 | 1519.904 | 1443.412 | 1555.932  | -0.66918  | 0.001267  | -0.23223  | 0.347984  | -0.27337  | 0.451792 |
| AT1G70300 | POT6      | 84.41218  | 94.56504 | 97.86173 | 89.9066  | 80.82101 | 109.6525 | 137.842  | 137.019  | 107.3871 | 73.88424 | 79.82004 | 87.01615  | 0.007488  | 0.979895  | 0.455804  | 0.0475    | -0.19281  | 0.656448 |
| AT1G70310 | SPDSVN2   | 932.1007  | 1088.39  | 1124.122 | 721.7273 | 741.3009 | 794.4821 | 884.857  | 814.5619 | 796.6167 | 1223.408 | 1141.427 | 1170.574  | -0.47458  | 3.11E-05  | -0.328    | 0.006958  | 0.16989   | 0.387879 |
| AT1G70320 | UPL2      | 2713.079  | 1960.886 | 1582.527 | 816.5828 | 706.8526 | 1173.282 | 1191.667 | 1535.26  | 763.4224 | 1467.13  | 1517.911 | 1468.915  | -1.15995  | 4.21E-06  | -0.80398  | 0.002417  | -0.46831  | 0.253568 |
| AT1G70330 | ENT1      | 174.7689  | 121.3253 | 173.8333 | 152.5938 | 143.7554 | 177.4377 | 132.5062 | 151.0446 | 134.7219 | 166.9592 | 163.6311 | 151.2424  | -0.23807  | 0.199855  | -0.40756  | 0.028741  | -0.20555  | 0.515113 |
| AT1G70340 | AT1G70340 | 32.100421 | 21.41095 | 24.46543 | 34.64291 | 33.78583 | 29.90522 | 28.45771 | 31.28781 | 25.3824  | 38.38143 | 38.57969 | 24.86176  | 0.299491  | 0.420605  | 0.091317  | 0.845978  | 0.328699  | 0.596904 |
| AT1G70350 | AT1G70350 | 34.47821  | 23.1952  | 50.21852 | 61.44992 | 68.8966  | 51.83572 | 59.58333 | 26.97225 | 94.69586 | 48.93632 | 50.55269 | 61.11849  | 0.665717  | 0.0870505 | 0.625809  | 0.1085961 | -0.495221 | 0.446233 |
| AT1G70360 | AT1G70360 | 34.47821  | 44.60615 | 50.21852 | 43.06037 | 33.89259 | 55.13682 | 43.1556  | 50.76479 | 46.05771 | 45.23135 | 39.36445 | 0         | -0.10783  | 0.760574  | -0.207332 | 0.552308  | 0.020012  | 0.981269 |
| AT1G70370 | JP650     | 104.7424  | 80.11265 | 781.6062 | 414.4777 | 369.6567 | 432.6289 | 349.4963 | 381.927  | 425.6433 | 769.5476 | 752.969  | 709.596   | -1.09885  | 1.37E-14  | -1.16909  | 5.81E-16  | -0.23557  | 0.344272 |
| AT1G70380 | AT1G70380 | 0         | 0        | 0        | 0.412416 | 2.649869 | 0        | 3.557214 | 2.15778  | 0        | 0.995936 | 1.330334 | 1.035907  | 0.458765  | 0.485171  | 0.79363   | 0.208618  | 0.478102  | NA       |
| AT1G70390 | AT1G70390 | 0         | 1.784246 | 1.287654 | 8.248311 | 8.612075 | 5.981405 | 6.225124 | 8.63112  | 6.833722 | 0        | 0        | 0.1035907 | 1.701963  | 0.004592  | 1.580786  | 0.011507  | -0.34813  | NA       |
| AT1G70400 | AT1G70400 | 0         | 0        | 0        | 0.824831 | 0.662467 | 1.993682 | 0.889303 | 1.07889  | 0        | 0        | 0        | 0         | 0.631406  | NA        | 0.357077  | NA        | 0         | NA       |
| AT1G70410 | BCA4      | 1917.702  | 2005.493 | 1980.412 | 1424.483 | 1657.493 | 1455.388 | 1717.245 | 1587.047 | 2180.934 | 2367.174 | 2886.825 | 2198.194  | -0.37352  | 0.01996   | -0.10399  | 0.602534  | 0.330249  | 0.156694 |
| AT1G70420 | AT1G70420 | 265.1256  | 381.8287 | 316.763  | 315.9103 | 347.7953 | 306.0301 | 344.1604 | 268.6436 | 428.572  | 347.3519 | 425.7069 | 367.7468  | 0.015772  | 0.954459  | 0.116634  | 0.605019  | 0.241328  | 0.494318 |
| AT1G70430 | AT1G70430 | 54.68958  | 71.36984 | 54.08148 | 27.21943 | 23.18635 | 22.92734 | 32.01493 | 36.68226 | 25.3824  | 98.83217 | 86.47171 | 93.23159  | -1.19605  | 4.1E-06   | -0.87526  | 0.001697  | 0.631506  | 0.070006 |
| AT1G70440 | SRO3      | 1.188904  | 1.784246 | 0        | 45.77813 | 47.69764 | 44.85784 | 46.24378 | 42.07671 | 39.04984 | 8.38143  | 0        | 0         | 3.76926   | 4.93E-16  | 0.640592  | 8.75E-15  | 0.027954  | 0.987439 |
| AT1G70450 | AT1G70450 | 2.377808  | 0        | 0        | 0.287654 | 3.299325 | 1.324935 | 0        | 0        | 2.15778  | 0.976246 | 0.995936 | 1.330334  | 0.0       | 0         | 0.166673  | NA        | 0         | NA       |
| AT1G70460 | PERK13    | 46.36725  | 44.60615 | 30.9037  | 42.89122 | 30.47349 | 30.90206 | 38.24005 | 29.13003 | 45.88356 | 72.92471 | 57.20436 | 55.93895  | -0.164893 | 0.835712  | -0.1331   | 0.874529  | 0.050398  | 0        |
| AT1G70470 | AT1G70470 | 46.36725  | 44.60615 | 30.9037  | 42.89122 | 30.47349 | 30.90206 | 38.24005 | 29.13003 | 45.88356 | 72.92471 | 57.20436 | 55.93895  | -0.09047  | 0.833738  | -0.09047  | 0.833738  | 0.586525  | 0.202595 |
| AT1G70480 | AT1G70480 | 166.4466  | 171.2876 | 199.5864 | 287.8661 | 275.5864 | 335.9353 | 249.8943 | 275.1169 | 253.824  | 188.609  | 156.9794 | 183.3555  | 0.722913  | 3.7E-06   | 0.522693  | 0.001803  | -0.02029  | 0.965527 |
| AT1G70490 | ARF2-A    | 1130.648  | 1136.565 | 1136.999 | 3085.281 | 3053.974 | 2694.461 | 2200.137 | 2226.829 | 3166.942 | 939.1194 | 1113.49  | 1175.575  | 1.353164  | 6.82E-20  | 1.137979  | 3.11E-14  | -0.05215  | 0.891697 |
| AT1G70500 | AT1G70500 | 7.133244  | 0        | 3.862963 | 15.67179 | 10.59948 | 18.93997 | 4.446517 | 11.86779 | 6.833722 | 11.51443 | 6.65167  | 5.179533  | 1.41129   | 0.009101  | 0.602641  | 0.359463  | 0.642764  | NA       |
| AT1G70505 | AT1G70505 | 63.01191  | 46.3904  | 68.24568 | 40.82914 | 32.4609  | 30.90206 | 40.90796 | 43.1556  | 24.46675 | 71.00564 | 82.48071 | 59.0667   | -0.72137  | 0.012907  | -0.68535  | 0.027866  | 0.226768  | 0.683683 |
| AT1G70510 | KNAT2     | 21.40027  | 17.84246 | 14.1642  | 19.38353 | 15.23675 | 11.96209 | 15.11816 | 21.5778  | 13.66744 | 26.867   | 21.28534 | 26.93357  | -0.14511  | 0.772124  | -0.08938  | 0.874916  | 0.447656  | 0.52541  |
| AT1G70518 | AT1G70518 | 58.25629  | 42.8219  | 52.79383 | 62.68717 | 72.8714  | 52.83256 | 72.92289 | 51.78672 | 81.02842 | 45.09817 | 89.13238 | 45.57989  | 0.26736   | 0.448223  | 0.383733  | 0.280139  | 0.176746  | 0.789813 |
| AT1G70520 | CRK2      | 479.1283  | 499.5889 | 477.7198 | 7125.439 | 588.2709 | 779.5259 | 712.3321 | 689.4107 | 652.1323 | 395.3287 | 445.6619 | 462.0143  | 0.515907  | 0.000223  | 0.496005  | 0.006039  | -0.15856  | 0.555797 |
| AT1G70530 | CRK3      | 253.2365  | 299.7533 |          |          |          |          |          |          |          |          |          |           |           |           |           |           |           |          |

|           |           |          |          |          |          |          |          |          |          |          |          |          |          |           |          |          |          |          |          |          |
|-----------|-----------|----------|----------|----------|----------|----------|----------|----------|----------|----------|----------|----------|----------|-----------|----------|----------|----------|----------|----------|----------|
| AT1G71000 | AT1G71000 | 0        | 0        | 0        | 0        | 0        | 2.649869 | 0        | 7.114428 | 3.23667  | 3.904984 | 0        | 2.660668 | 1.035907  | 0.319661 | 0.658725 | 1.461623 | 0.017655 | 0.468185 | NA       |
| AT1G71000 | FAB1C     | 804.888  | 528.1368 | 473.8568 | 279.2053 | 261.0121 | 371.8216 | 371.7289 | 418.6093 | 274.3251 | 527.7446 | 510.8482 | 502.4147 | 0         | 0        | 0        | 0        | 0        | 0        | 0        |
| AT1G71010 | MIR58A    | 0        | 0        | 0        | 0        | 0        | 0        | 0        | 0        | 0        | 0        | 0        | 0        | 0         | 0        | 0        | 0        | 0        | 0        | 0        |
| AT1G71010 | FAB1C     | 804.888  | 528.1368 | 473.8568 | 279.2053 | 261.0121 | 371.8216 | 371.7289 | 418.6093 | 274.3251 | 527.7446 | 510.8482 | 502.4147 | 0         | 0        | 0        | 0        | 0        | 0        | 0        |
| AT1G71015 | AT1G71015 | 19.02246 | 28.54794 | 19.31482 | 23.50769 | 25.83622 | 20.93366 | 20.45398 | 14.02557 | 20.50117 | 36.46235 | 41.24035 | 35.22082 | 0.099798  | 0.824736 | -0.22117 | 0.636462 | 0.723626 | 0.158726 | 0.158726 |
| AT1G71020 | PUBM10    | 485.0728 | 569.1745 | 482.8704 | 398.8059 | 347.7953 | 476.4899 | 402.8545 | 425.0826 | 326.0662 | 463.4557 | 453.6439 | 434.0448 | -0.32511  | 0.055717 | -0.40331 | 0.019465 | -0.17929 | 0.551316 | 0.551316 |
| AT1G71030 | AT1G71030 | 1228.138 | 1885.948 | 1572.226 | 1504.048 | 1490.551 | 1499.249 | 1256.586 | 1068.101 | 986.0085 | 1369.257 | 1552.5   | 1417.112 | -0.05701  | 0.788076 | -0.48962 | 0.039365 | -0.10733 | 0.753536 | 0.753536 |
| AT1G71040 | LP2       | 67.25235 | 67.87665 | 54.96564 | 1189.407 | 1081.809 | 1222.127 | 801.2624 | 773.5641 | 572.0804 | 423.1552 | 532.1336 | 450.6193 | 0.899651  | 8.64E-09 | 0.209447 | 0.277745 | -0.39271 | 0.104365 | 0.104365 |
| AT1G71050 | HIPP20    | 72.52314 | 71.36984 | 70.82099 | 184.7622 | 158.9921 | 154.5103 | 132.5062 | 118.6779 | 144.4844 | 106.5085 | 54.54369 | 78.7289  | 1.176318  | 1.19E-07 | 0.847459 | 0.000345 | -0.16719 | 0.7414   | 0.7414   |
| AT1G71060 | AT1G71060 | 54.68958 | 41.03766 | 36.05432 | 37.1174  | 40.4105  | 47.84836 | 55.13682 | 55.02339 | 64.43224 | 37.42189 | 38.57969 | 45.57989 | -0.1007   | 0.77633  | 0.376851 | 0.231718 | -0.11919 | 0.857736 | 0.857736 |
| AT1G71070 | AT1G71070 | 364.9935 | 356.8492 | 338.6531 | 233.4272 | 282.8735 | 307.027  | 332.5995 | 269.7225 | 249.919  | 375.1784 | 423.0462 | 390.5368 | -0.36752  | 0.030091 | -0.3075  | 0.09193  | 0.160319 | 0.603407 | 0.603407 |
| AT1G71080 | AT1G71080 | 428.0054 | 444.2773 | 449.3914 | 507.2712 | 474.989  | 465.5246 | 448.209  | 502.7627 | 564.2702 | 452.9008 | 420.3855 | 422.6499 | 0.133354  | 0.372593 | 0.19471  | 0.195946 | -0.02617 | 0.940115 | 0.940115 |
| AT1G71090 | AT1G71090 | 461.2947 | 442.493  | 471.2815 | 416.1273 | 412.7171 | 400.73   | 437.5373 | 422.9249 | 415.8808 | 418.3575 | 444.3315 | 424.7217 | -0.16023  | 0.195904 | -0.10818 | 0.442624 | -0.09803 | 0.665659 | 0.665659 |
| AT1G71100 | RP11      | 87.97889 | 82.07532 | 101.7247 | 213.2189 | 189.4656 | 163.4819 | 147.6244 | 145.6501 | 283.1113 | 71.96517 | 63.85603 | 78.7289  | 1.009114  | 0.000116 | 1.028285 | 0.000112 | -0.32263 | 0.526123 | 0.526123 |
| AT1G71110 | AT1G71110 | 49.93397 | 44.60615 | 57.94445 | 116.3012 | 91.42048 | 139.5577 | 150.2923 | 133.7824 | 107.3871 | 50.85539 | 61.19536 | 64.2262  | -1.116018 | 4.89E-06 | 1.291896 | 1.3E-07  | 0.180306 | 0.746516 | 0.746516 |
| AT1G71120 | GLIP6     | 1.188904 | 0        | 2.575309 | 0.824831 | 1.324935 | 0.996841 | 2.66791  | 0        | 0.959536 | 2.660668 | 1.035907 | 0        | 0         | 0        | 0        | 0        | 0        | 0        | 0        |
| AT1G71130 | ERF070    | 64.20081 | 51.74313 | 86.27284 | 139.8089 | 117.9192 | 93.70303 | 121.8346 | 118.6779 | 159.1281 | 71.00564 | 69.17737 | 80.80071 | 0.763113  | 0.001923 | 0.92723  | 0.000172 | 0.107101 | 0.858201 | 0.858201 |
| AT1G71140 | AT1G71140 | 59.4452  | 121.3287 | 105.8777 | 247.4493 | 224.5764 | 271.1407 | 361.0572 | 335.5348 | 287.9262 | 128.5778 | 106.4267 | 105.6625 | 1.347134  | 1.85E-10 | 1.744535 | 1.61E-17 | 0.262818 | 0.538161 | 0.538161 |
| AT1G71150 | AT1G71150 | 1.188904 | 0        | 1.287654 | 0        | 0        | 0        | 0.889303 | 0        | 0.976246 | 0.959536 | 2.660668 | 2.071813 | -0.65294  | 0.285535 | -0.12511 | 0.871211 | 0.438684 | NA       | NA       |
| AT1G71160 | KCS7      | 0        | 0        | 1.287654 | 0        | 0        | 0        | 0.889303 | 0        | 0.976246 | 0.959536 | 5.321336 | 2.071813 | -0.48026  | 0.487704 | 0.366008 | 0.630359 | 1.524641 | NA       | NA       |
| AT1G71170 | AT1G71170 | 71.33424 | 90.99655 | 66.95803 | 96.91766 | 88.10815 | 81.74094 | 37.35075 | 79.83786 | 125.9357 | 39.34096 | 46.51619 | 55.93895 | -0.214795 | 0.592001 | 0.082439 | 0.862109 | -0.62661 | 0.246344 | 0.246344 |
| AT1G71180 | AT1G71180 | 70.14533 | 78.50683 | 73.3963  | 54.02644 | 45.71024 | 48.8452  | 41.12562 | 58.26006 | 69.31347 | 73.88424 | 65.18636 | 55.93895 | -0.53924  | 0.063694 | -0.46183 | 0.144862 | -0.1712  | 0.773221 | 0.773221 |
| AT1G71190 | SAG18     | 116.5126 | 171.2876 | 155.8062 | 243.3252 | 255.0499 | 290.0807 | 257.0087 | 231.9613 | 219.6553 | 119.9424 | 74.4987  | 137.7756 | -0.811001 | 0.000121 | 0.665054 | 0.002711 | -0.38012 | 0.298293 | 0.298293 |
| AT1G71200 | AT1G71200 | 0        | 0        | 2.575309 | 0        | 0.662467 | 0        | 0.889303 | 0        | 0        | 0.959536 | 0        | 0        | -0.30294  | NA       | -0.24219 | NA       | -0.22487 | NA       | NA       |
| AT1G71210 | AT1G71210 | 139.1018 | 135.6027 | 118.4642 | 123.7247 | 105.9948 | 149.5261 | 157.4067 | 146.729  | 104.4583 | 94.03449 | 95.78405 | 114.9856 | -0.05776  | 0.840399 | 0.056024 | 0.856818 | -0.35211 | 0.340615 | 0.340615 |
| AT1G71220 | UGGT      | 926.1562 | 783.284  | 690.1827 | 910.2012 | 841.3334 | 1106.493 | 1105.168 | 1180.306 | 626.7499 | 724.4494 | 659.8456 | 725.1346 | 0.242552  | 0.327709 | 0.255159 | 0.324275 | -0.17996 | 0.679323 | 0.679323 |
| AT1G71230 | CSNSA     | 28.53699 | 24.97944 | 24.46543 | 40.82914 | 45.71024 | 47.84836 | 42.68657 | 42.07671 | 38.07359 | 34.54328 | 31.92802 | 34.18492 | 0.717074  | 0.017284 | 0.603573 | 0.067787 | 0.334976 | 0.561709 | 0.561709 |
| AT1G71235 | AT1G71235 | 0        | 0        | 0        | 0        | 0        | 0        | 0        | 0        | 0        | 0        | 0        | 0        | 0         | 0        | 0        | 0        | 0        | 0        | 0        |
| AT1G71240 | AT1G71240 | 203.3026 | 221.2465 | 206.0247 | 134.8599 | 137.1307 | 174.4471 | 193.8682 | 192.0424 | 147.4131 | 175.595  | 150.3277 | 194.7504 | -0.49654  | 0.008429 | -0.23291 | 0.286936 | -0.26187 | 0.418228 | 0.418228 |
| AT1G71250 | AT1G71250 | 0        | 0        | 0        | 0        | 0.662467 | 0.996841 | 1.778607 | 0        | 0.976246 | 0        | 1.330334 | 2.071813 | 0.219667  | NA       | 0.460737 | NA       | 0.526345 | NA       | NA       |
| AT1G71260 | WHY2      | 160.502  | 178.4246 | 182.8469 | 239.201  | 246.4378 | 223.2923 | 224.1045 | 159.6757 | 295.0377 | 228.3695 | 182.2558 | 205.1095 | 0.436537  | 0.023575 | 0.267936 | 0.22096  | 0.239407 | 0.481893 | 0.481893 |
| AT1G71270 | VP52      | 535.0068 | 483.5307 | 516.3494 | 477.9897 | 527.3239 | 548.2624 | 525.5784 | 489.816  | 410.0233 | 503.7562 | 512.1786 | 485.4804 | 0.01119   | 0.952704 | -0.10738 | 0.52897  | -0.03412 | 0.920759 | 0.920759 |
| AT1G71280 | RH55      | 0        | 0        | 0        | 0.824831 | 1.324935 | 1.993682 | 1.778607 | 0        | 1.952492 | 0.959536 | 3.991002 | 3.10772  | 0.595866  | 0.831514 | 0.736557 | 0.284527 | 1.087806 | NA       | NA       |
| AT1G71290 | AT1G71290 | 0        | 0        | 0        | 0.662467 | 0        | 0        | 0        | 0        | 0        | 0        | 0        | 0        | 0.128567  | NA       | 0.0      | NA       | 0        | NA       | NA       |
| AT1G71300 | AT1G71300 | 4.755616 | 10.70548 | 3.862963 | 1.237247 | 1.987402 | 2.990522 | 11.56095 | 10.7889  | 0        | 0.959536 | 2.660668 | 1.035907 | -0.8991   | 0.183636 | -0.30199 | 0.713733 | -0.10139 | NA       | NA       |
| AT1G71310 | AT1G71310 | 86.78999 | 108.839  | 96.57408 | 148.882  | 133.8184 | 132.5798 | 123.6132 | 102.4945 | 157.1756 | 130.4968 | 103.766  | 119.1293 | 0.506651  | 0.019066 | 0.390875 | 0.09966  | 0.280764 | 0.464701 | 0.464701 |
| AT1G71320 | AT1G71320 | 0        | 0        | 0        | 0        | 0        | 0        | 0        | 0        | 1.07889  | 0        | 0        | 0        | 0         | 0        | 0        | 0        | 0.16673  | NA       | NA       |
| AT1G71330 | NAP5      | 23.77808 | 30.33218 | 14.1642  | 21.03319 | 22.52389 | 31.8989  | 25.7898  | 12.6912  | 13.4335  | 7.982004 | 26.93357 | 0        | 0.131447  | 0.808218 | -0.13749 | 0.816219 | -0.3865  | 0.642572 | 0.642572 |
| AT1G71340 | GDPD4     | 407.7941 | 412.1608 | 383.721  | 237.5514 | 258.3622 | 227.2797 | 221.2789 | 218.6569 | 236.2515 | 406.8431 | 299.3251 | 377.07   | -0.72105  | 5.99E-07 | -0.80009 | 6.19E-08 | -0.14284 | 0.615864 | 0.615864 |
| AT1G71350 | AT1G71350 | 153.3686 | 158.7979 | 128.7654 | 134.0351 | 140.4431 | 153.7513 | 139.1768 | 141.5557 | 122.7319 | 128.5778 | 122.3907 | 128.4524 | -0.04516  | 0.843691 | -0.12248 | 0.589511 | -0.20497 | 0.535672 | 0.535672 |
| AT1G71360 | AT1G71360 | 109.3792 | 119.5445 | 106.8753 | 63.92441 | 62.93439 | 65.79149 | 68.47637 | 83.07453 | 83.95716 | 77.72239 | 94.45371 | 99.44703 | -0.77613  | 0.000118 | -0.49537 | 0.02255  | -0.29633 | 0.404371 | 0.404371 |
| AT1G71370 | RH49      | 0        | 0        | 1.287654 | 0.824831 | 0        | 0        | 1.778607 | 2.15778  | 0.976246 | 0.959536 | 0        | 0        | -0.11767  | NA       | 0.54214  | NA       | -0.06939 | NA       | NA       |
| AT1G71380 | CEL3      | 2.377808 | 1.784246 | 0        | 2.474493 | 1.324935 | 0.889303 | 3.23667  | 0.976246 | 1.919071 | 5.321336 | 5.179533 | 0        | -0.03057  | 0.971524 | 0.083585 | 0.925495 | 0.780772 | NA       | NA       |
| AT1G71390 | AIRPL11   | 7.133424 | 8.92123  | 2.575309 | 32.99325 | 35.11077 | 39.87363 | 51.5796  | 39.91893 | 34.16861 | 0        | 1.330334 | 0        | 2.223238  | 1.12E-07 | 2.432246 | 6.97E-09 | -1.48125 | 0.051327 | 0.051327 |
| AT1G71400 | RLP12     | 14.26685 | 10.70548 | 11.58889 | 45.36571 | 54.98478 | 54.82624 | 71.14428 | 65.81229 | 36.1211  | 5.757214 | 3.991002 | 11.39497 | 1.842018  | 6.1E-07  | 1.992657 | 8.11E-08 | -0.61391 | 0.427403 | 0.427403 |
| AT1G71410 | AT1G71410 | 508.8509 | 472.8252 | 381.1457 | 315.9103 | 255.0499 | 386.7742 | 328.153  | 371.1381 | 202.0829 | 30.3133  | 341.8958 | 352.2807 | -0.49408  | 0.036694 | -0.57577 | 0.016856 | -0.43494 | 0.220441 | 0.220441 |
| AT1G71420 | PCMP-H7   | 11.88904 | 8.92123  | 6.438272 | 10.31039 | 9.562205 | 7.974726 | 11.56095 | 6.83112  | 5.857476 | 16.31211 | 5.321336 | 6.215439 | -0.12195  | 0.056961 | -0.05081 | 0.946133 | -0.04893 | NA       | NA       |
| AT1G71430 | AT1G71430 | 43.98945 | 62.44861 | 60.51975 | 91.14384 | 95.39529 | 63.79781 | 58.69403 | 63.65451 | 89.81463 | 54.69353 | 58.53469 | 62.15439 | 0.584302  | 0.03302  | 0.338572 | 0.285777 | 0.077061 | 0.909915 | 0.909915 |
| AT1G71440 | TFCE      | 208.0582 | 230.1677 | 185.4222 | 177.3387 | 170.2541 | 193.3871 | 178.75   | 165.0702 | 156.1994 | 167.9187 | 172.9434 | 178.1759 | -0.19973  | 0.253032 | -0.30475 | 0.087033 | -0.25357 | 0.345352 | 0.345352 |
| AT1G71450 | ERF021    | 0        | 1.784246 | 0        | 0.412416 | 0        | 0        | 0        | 0        | 0        | 0.959536 | 0        | 0        | -0.17674  | NA       | -0.26494 | NA       | -0.07273 |          |          |

|           |           |          |          |          |          |          |          |          |          |           |           |          |          |          |          |            |          |           |          |    |
|-----------|-----------|----------|----------|----------|----------|----------|----------|----------|----------|-----------|-----------|----------|----------|----------|----------|------------|----------|-----------|----------|----|
| AT1G72080 | AT1G72080 | 0        | 0        | 0        | 1.237247 | 0        | 0.996841 | 0.889303 | 0        | 0         | 0         | 0        | 0        | 0.388076 | NA       | 0.146596   | NA       | 0         | NA       |    |
| AT1G72090 | AT1G72090 | 294.8482 | 228.3835 | 261.3938 | 286.6288 | 270.9491 | 285.0965 | 236.5547 | 250.3025 | 273.3489  | 289.7798  | 270.0578 | 263.1203 | 0.092485 | 0.603537 | -0.05498   | 0.791049 | 0.059744  | 0.86482  |    |
| AT1G72100 | AT1G72100 | 0        | 1.784246 | 0        | 0.412416 | 0        | 0        | 0        | 0        | 0         | 0         | 0        | 0        | -0.1773  | NA       | -0.2652    | NA       | -0.0567   | NA       |    |
| AT1G72110 | AT1G72110 | 2.377808 | 5.352738 | 0        | 0.824831 | 0        | 0        | 0.889303 | 0        | 0         | 0.976246  | 4.797678 | 11.97301 | 9.323159 | -1.01592 | 0.127151   | -0.71678 | 0.325868  | 1.26933  | NA |
| AT1G72120 | NPFS.14   | 43.98945 | 44.60615 | 39.91728 | 58.1506  | 62.93439 | 63.79781 | 57.80473 | 61.49673 | 51.74104  | 33.58375  | 21.28534 | 20.93357 | 0.501625 | 0.065591 | 0.39596    | 0.193271 | -0.5893   | 0.190551 |    |
| AT1G72125 | NPFS.13   | 2.377808 | 0        | 2.575309 | 2.886909 | 4.637271 | 3.987363 | 1.778607 | 1.07889  | 1.952492  | 1.919071  | 5.321336 | 1.035907 | 0.617305 | 0.381445 | -0.08818   | 0.912257 | -0.64957  | NA       |    |
| AT1G72130 | NPFS.11   | 189.0357 | 201.6198 | 175.121  | 95.98649 | 70.22153 | 83.73463 | 80.92662 | 65.81229 | 67.36097  | 115.1443  | 150.3277 | 188.35   | -1.33225 | 8.92E-11 | -1.34819   | 2.54E-10 | -0.30675  | 0.398508 |    |
| AT1G72131 | AT1G72131 | 1.188904 | 0        | 0        | 0.412416 | 1.324935 | 0        | 0        | 0        | 0         | 1.919071  | 3.991002 | 1.035907 | 0.060504 | 0.936783 | -0.30675   | 0.648029 | 0.766581  | NA       |    |
| AT1G72140 | NPFS.12   | 11.88904 | 3.568492 | 3.862963 | 11.54764 | 11.92441 | 18.93997 | 14.22886 | 14.02557 | 6.833722  | 15.35257  | 7.982004 | 12.43088 | 0.808306 | 0.126432 | 0.602806   | 0.31007  | 0.643483  | NA       |    |
| AT1G72141 | AT1G72141 | 0        | 0        | 0        | 0        | 0        | 0        | 0.889303 | 0        | 0         | 0         | 0        | 0        | 0        | 0        | 0          | 0        | 0         | 0        | NA |
| AT1G72150 | PATL1     | 7839.633 | 8098.693 | 6641.721 | 4213.238 | 4574.999 | 5307.18  | 5499.453 | 6374.082 | 6714.62   | 5841.653  | 5766.998 | 6162.608 | -0.67205 | 2.5E-07  | -0.27716   | 0.058917 | -0.34108  | 0.072058 |    |
| AT1G72160 | PATL3     | 1587.187 | 1536.236 | 1357.188 | 861.9486 | 985.7513 | 1008.803 | 958.6692 | 889.0053 | 1012.367  | 1268.506  | 1513.92  | 1462.7   | -0.64445 | 1.72E-07 | -0.63992   | 2.91E-07 | -0.07773  | 0.77538  |    |
| AT1G72170 | AT1G72170 | 147.4241 | 153.4452 | 169.9704 | 194.2477 | 207.3523 | 149.5261 | 118.2774 | 114.3623 | 220.6316  | 187.1094  | 211.5231 | 163.6732 | 0.222297 | 0.449032 | -0.05268   | 0.884813 | 0.242314  | 0.612819 |    |
| AT1G72175 | AT1G72175 | 61.82301 | 90.99655 | 73.3963  | 117.9509 | 105.9948 | 91.70935 | 99.60199 | 89.54786 | 135.6982  | 86.35821  | 115.7391 | 102.5547 | 0.488083 | 0.051238 | 0.518313   | 0.047685 | 0.420505  | 0.28611  |    |
| AT1G72180 | AT1G72180 | 1689.433 | 1496.982 | 1261.901 | 651.2042 | 604.8326 | 962.9482 | 823.495  | 1052.997 | 951.8398  | 1377.4093 | 1344.968 | 1280.38  | -0.98312 | 6.62E-08 | -0.63826   | 0.000858 | -0.14854  | 0.694535 |    |
| AT1G72190 | AT1G72190 | 46.36725 | 90.99655 | 90.1358  | 113.0019 | 103.3449 | 111.6462 | 133.3955 | 103.5734 | 103.4821  | 92.11542  | 91.79304 | 87.01615 | 0.526153 | 0.034774 | 0.580274   | 0.024415 | 0.259061  | 0.57468  |    |
| AT1G72200 | ATL11     | 17.83356 | 16.05821 | 6.438272 | 20.20836 | 16.56168 | 18.93997 | 12.45025 | 17.26224 | 8.786214  | 16.31211  | 11.97301 | 12.43088 | 0.424333 | 0.381668 | -0.05948   | 0.926534 | 0.028251  | NA       |    |
| AT1G72210 | BHLH96    | 23.77808 | 23.1952  | 12.42363 | 11.54764 | 11.92441 | 12.95889 | 19.56468 | 15.10446 | 12.6912   | 19.19071  | 19.95501 | 21.75404 | -0.63857 | 0.130333 | -0.28225   | 0.575866 | 0.035404  | 0.975744 |    |
| AT1G72220 | ATL54     | 15.45575 | 10.70548 | 14.1642  | 12.78488 | 10.59948 | 13.95577 | 7.114428 | 4.31556  | 10.73871  | 12.47396  | 2.660668 | 11.39497 | -0.10243 | 0.868795 | -0.70266   | 0.209264 | -0.46369  | NA       |    |
| AT1G72230 | AT1G72230 | 83.22328 | 73.15409 | 59.2321  | 21.03319 | 15.23675 | 13.95577 | 7.114428 | 14.02557 | 6.833722  | 72.92471  | 69.17737 | 69.40574 | -1.93224 | 5.57E-12 | -2.68439   | 1.89E-16 | -0.02144  | 0.978375 |    |
| AT1G72240 | AT1G72240 | 8.322328 | 12.48972 | 5.150617 | 68.46099 | 62.27192 | 48.8452  | 51.5796  | 34.52448 | 108.3633  | 15.35257  | 19.95501 | 22.78994 | 2.365823 | 1E-08    | 2.460493   | 3.01E-09 | 0.901232  | 0.195751 |    |
| AT1G72250 | AT1G72250 | 19.1833  | 1063.483 | 126.1901 | 94.85558 | 88.10815 | 115.6335 | 113.8098 | 99.25787 | 106.14719 | 129.5373  | 123.7211 | 146.0628 | -0.28964 | 0.213727 | -0.31969   | 1.96724  | 0.131801  | 0.770425 |    |
| AT1G72260 | THI2.1    | 10.70014 | 16.05821 | 21.89012 | 11.96005 | 15.23675 | 10.96525 | 79.14801 | 74.44341 | 84.9334   | 70.0461   | 38.57969 | 33.14901 | -0.33024 | 0.470721 | 2.09801    | 1.16E-09 | 1.398373  | 0.00163  |    |
| AT1G72270 | AT1G72270 | 67.76752 | 74.98333 | 72.10864 | 38.76706 | 35.11077 | 37.87995 | 56.91542 | 40.99782 | 62.47974  | 74.84378  | 57.20436 | 33.1903  | -0.896   | 0.000287 | -0.39249   | 0.167597 | -0.11817  | 0.836113 |    |
| AT1G72280 | AER01     | 41.61164 | 53.52738 | 45.0679  | 419.8391 | 474.3266 | 430.6352 | 405.5224 | 357.1126 | 303.6125  | 39.34096  | 37.24935 | 38.32803 | 3.159822 | 1.07E-58 | 2.851115   | 4.9E-47  | -0.25654  | 0.951139 |    |
| AT1G72290 | AT1G72290 | 1.188904 | 0        | 0        | 0        | 0.662467 | 0        | 0        | 0        | 0         | 0         | 0        | 0        | -0.07436 | 0        | -0.18968   | NA       | -0.18606  | NA       |    |
| AT1G72300 | PSYR1     | 231.8363 | 123.113  | 142.9296 | 84.13278 | 81.48347 | 90.71251 | 81.81592 | 116.5201 | 68.33722  | 112.2657  | 102.4357 | 126.3806 | -0.82756 | 0.000256 | -0.8745    | 0.000911 | -0.52953  | 0.179029 |    |
| AT1G72310 | ATL3      | 247.292  | 185.5616 | 194.4358 | 112.5895 | 115.9318 | 108.6556 | 123.6132 | 132.7035 | 130.817   | 200.5429  | 188.9074 | 139.8474 | -0.87925 | 1.8E-06  | -0.68727   | 0.000397 | -0.24731  | 0.46153  |    |
| AT1G72320 | APUM23    | 334.082  | 322.9485 | 262.6815 | 244.15   | 278.8987 | 316.9954 | 336.1567 | 311.7992 | 325.2753  | 267.7104  | 236.7994 | 309.7361 | -0.1326  | 0.562304 | -0.0553    | 0.837096 | -0.1675   | 0.65394  |    |
| AT1G72330 | ALAA2     | 72.52314 | 105.2705 | 78.54691 | 308.8993 | 296.7853 | 344.9069 | 299.6953 | 277.2747 | 244.0615  | 67.16749  | 71.83803 | 93.23159 | 1.860601 | 3.9E-24  | 1.655636   | 9.52E-19 | -0.11691  | 0.806773 |    |
| AT1G72340 | AT1G72340 | 256.8033 | 337.2225 | 256.2432 | 430.9743 | 418.6793 | 416.6794 | 329.9316 | 333.377  | 369.9972  | 310.8895  | 363.1812 | 258.9766 | 0.574578 | 0.000429 | 0.285081   | 0.127176 | 0.1361    | 0.685051 |    |
| AT1G72350 | AT1G72350 | 0        | 0        | 0        | 0        | 0        | 0        | 0        | 0        | 0         | 0         | 0        | 0        | #N/A     | #N/A     | #N/A       | #N/A     | #N/A      | #N/A     |    |
| AT1G72360 | ER073     | 19.02246 | 28.54794 | 21.89012 | 37.52982 | 35.11077 | 36.88311 | 20.23632 | 28.05114 | 47.83605  | 27.82653  | 17.29434 | 20.71813 | 0.629296 | 0.078977 | 0.58393    | 0.131381 | -0.03251  | 0.975777 |    |
| AT1G72370 | RPSAA     | 3208.852 | 3349.03  | 3362.065 | 3554.197 | 3385.208 | 3065.285 | 2676.803 | 2835.323 | 3646.279  | 3163.589  | 3489.466 | 3364.624 | 0.012822 | 0.947877 | -0.11375   | 0.500536 | 0.01387   | 0.971711 |    |
| AT1G72390 | AT1G72390 | 363.8046 | 285.4794 | 233.0654 | 187.2367 | 145.7428 | 240.2386 | 216.1007 | 250.3025 | 139.6032  | 251.3983  | 267.3971 | 229.9712 | -0.60371 | 0.017232 | -0.5219    | 0.051804 | -0.22943  | 0.626348 |    |
| AT1G72410 | AT1G72410 | 173.3424 | 660.171  | 636.1012 | 297.3516 | 302.0851 | 374.8121 | 429.5336 | 447.7393 | 388.5459  | 560.3688  | 574.7043 | 650.5493 | -1.04031 | 1.43E-11 | -0.65923   | 1.81E-06 | -0.16861  | 0.505207 |    |
| AT1G72416 | AT1G72416 | 60.6341  | 78.50683 | 79.83457 | 220.2299 | 240.4756 | 234.2576 | 192.0896 | 163.9913 | 279.2064  | 74.84378  | 125.0514 | 106.6984 | 1.599179 | 2.9E-11  | -0.1475005 | 8.37E-10 | -0.453932 | 0.275882 |    |
| AT1G72420 | AT1G72420 | 53.00968 | 76.72258 | 57.94445 | 101.0418 | 106.6572 | 87.72199 | 60.91915 | 75.5223  | 108.3633  | 67.16749  | 79.82004 | 68.36983 | 0.648247 | 0.010698 | 0.400655   | 0.166593 | 0.196711  | 0.70827  |    |
| AT1G72430 | AT1G72430 | 300.1615 | 351.4965 | 391.4469 | 337.3558 | 384.231  | 332.9448 | 320.1493 | 275.1169 | 563.2939  | 377.0975  | 513.5089 | 342.8851 | 0.003719 | 0.991752 | 0.134041   | 0.682428 | 0.217917  | 0.652681 |    |
| AT1G72440 | EDA25     | 527.8734 | 446.0615 | 435.2272 | 358.3891 | 376.2814 | 348.8943 | 392.1828 | 383.0059 | 461.7644  | 400.1264  | 413.7339 | 399.8599 | -0.37657 | 0.006478 | -0.18856   | 0.235301 | -0.21663  | 0.34135  |    |
| AT1G72450 | THY1B     | 758.5207 | 942.0819 | 945.1383 | 1466.55  | 1436.892 | 1651.765 | 1996.486 | 1913.951 | 1488.755  | 1082.356  | 1303.727 | 826.6534 | 0.766395 | 2.6E-05  | 1.006319   | 1.87E-08 | 0.273123  | 0.388757 |    |
| AT1G72460 | AT1G72460 | 0        | 0        | 0        | 0        | 0        | 0.996841 | 0        | 1.07889  | 0         | 0         | 1.330334 | 0        | 0.131103 | 0        | 0.159742   | 0        | 0.186122  | NA       |    |
| AT1G72470 | ATEX070D1 | 111.757  | 107.0548 | 114.6012 | 54.85127 | 62.27192 | 54.82624 | 70.25498 | 87.39009 | 76.14719  | 117.0633  | 117.0694 | 106.6984 | -0.93269 | 1.79E-06 | -0.50556   | 0.018726 | 0.028114  | 0.959035 |    |
| AT1G72480 | AT1G72480 | 316.2484 | 312.2431 | 274.2704 | 233.0148 | 264.9869 | 280.1123 | 232.9975 | 223.3302 | 151.3181  | 221.6527  | 234.1388 | 256.9048 | -0.21343 | 0.295095 | -0.55666   | 0.003438 | -0.3324   | 0.257373 |    |
| AT1G72490 | AT1G72490 | 2.377808 | 1.784246 | 0        | 0.412416 | 0        | 0.247493 | 0.662467 | 0        | 2.66791   | 1.07889   | 0        | 1.919071 | -0.07978 | 0.92317  | -0.03913   | 0.963456 | 0.020576  | NA       |    |
| AT1G72500 | AT1G72500 | 531.4401 | 601.2909 | 579.4445 | 288.6909 | 267.6368 | 314.0048 | 297.0274 | 255.6969 | 166.9381  | 559.4093  | 360.0706 | 568.7127 | -0.95515 | 5.67E-08 | -1.21847   | 5.44E-12 | -0.0182   | 0.971789 |    |
| AT1G72510 | AT1G72510 | 594.452  | 615.5649 | 643.8272 | 671.825  | 804.2353 | 689.8138 | 900.8644 | 809.1675 | 1433.129  | 816.5648  | 893.9844 | 813.1866 | 0.218076 | 0.334938 | 0.74181    | 0.000181 | 0.432559  | 0.144935 |    |
| AT1G72520 | LOX4      | 27.34479 | 33.90067 | 15.45185 | 96.09283 | 72.8714  | 150.523  | 157.4067 | 187.7268 | 171.8913  | 33.58375  | 34.58868 | 30.04129 | 1.906135 | 2.47E-10 | 2.582777   | 2.16E-18 | 0.325766  | 0.613784 |    |
| AT1G72530 | MORF7     | 17.83356 | 30.33218 | 27.04074 | 34.64291 | 24.51129 | 23.92418 | 18.67537 | 26.97225 | 27.33489  | 27.82653  | 23.94601 | 20.71813 | 0.181697 | 0.675698 | -0.02426   | 0.963111 | -0.02289  | 0.983524 |    |
| AT1G72540 | AT1G72540 | 32.10044 | 28.54794 | 32.19136 | 43.30364 | 47.03518 | 46.85152 | 51.5796  | 48.55005 | 35.14486  | 34.54328  | 17.29434 | 22.78994 | 0.51705  | 0.134321 | 0.501237   | 0.153996 | -0.27159  | 0.679803 |    |
| AT1G72550 | AT1G72550 | 674.1085 | 608.4279 | 629.663  | 545.6258 | 535.936  |          |          |          |           |           |          |          |          |          |            |          |           |          |    |

|           |           |          |           |          |          |          |          |          |          |          |          |           |           |          |           |          |          |          |          |
|-----------|-----------|----------|-----------|----------|----------|----------|----------|----------|----------|----------|----------|-----------|-----------|----------|-----------|----------|----------|----------|----------|
| AT1G73066 | AT1G73066 | 14.26685 | 12.48972  | 9.01358  | 7.42348  | 7.28714  | 5.981045 | 8.003731 | 14.02557 | 3.904984 | 6.716749 | 6.65167   | 8.287252  | -0.62069 | 0.254807  | -0.38501 | 0.535921 | -0.57062 | NA       |
| AT1G73080 | PEPR1     | 269.8812 | 198.0513  | 202.1617 | 145.5827 | 149.0551 | 201.3618 | 201.8179 | 288.0636 | 231.3703 | 190.9476 | 146.3367  | 203.0377  | -0.43596 | 0.055307  | 0.095713 | 0.743563 | -0.30065 | 0.428812 |
| AT1G73090 | AT1G73090 | 72.52314 | 92.78079  | 101.7247 | 107.4085 | 90.75802 | 101.6678 | 85.37313 | 110.6523 | 112.2668 | 101.7108 | 85.14137  | 88.05205  | 0.174736 | 0.942659  | 0.176359 | 0.519719 | 0.051556 | 0.927445 |
| AT1G73100 | SUVH3     | 147.4241 | 180.2088  | 163.5321 | 136.922  | 135.1433 | 141.5514 | 131.6169 | 132.7035 | 100.5533 | 110.3466 | 94.45371  | 141.9192  | -0.23584 | 0.28081   | -0.41071 | 0.059626 | -0.47443 | 0.106455 |
| AT1G73110 | AT1G73110 | 423.2498 | 440.7088  | 442.9531 | 312.1986 | 317.9843 | 293.0712 | 461.5485 | 453.1338 | 432.477  | 474.0106 | 534.7943  | 507.5942  | -0.49227 | 2.966-05  | 0.044668 | 0.788647 | 0.112123 | 0.273403 |
| AT1G73120 | AT1G73120 | 0        | 1.784246  | 1.287654 | 0        | 0        | 0        | 0        | 0        | 0        | 1.919071 | 1.330334  | 0         | -0.57802 | NA        | -0.51845 | NA       | 0.085517 | 0.273405 |
| AT1G73130 | AT1G73130 | 131.9683 | 144.5239  | 136.9149 | 148.0572 | 153.6924 | 166.4724 | 207.2077 | 146.729  | 130.817  | 158.3234 | 152.9884  | 135.7038  | 0.174565 | 0.459986  | 0.232318 | 0.337656 | 0.118342 | 0.798327 |
| AT1G73140 | TBL31     | 4.755616 | 3.568492  | 1.287654 | 2.062078 | 1.324935 | 1.993682 | 1.778607 | 0        | 0        | 4.31556  | 1.952492  | 4.976778  | 0.47885  | 0.51088   | -0.15807 | 0.856762 | 0.113869 | NA       |
| AT1G73150 | GTE3      | 57.06739 | 55.31163  | 51.50617 | 60.21267 | 60.94699 | 58.81361 | 67.58706 | 62.57562 | 51.74104 | 65.24842 | 65.18636  | 58.01077  | 0.13107  | 0.655646  | 0.145717 | 0.646822 | 0.19152  | 0.697022 |
| AT1G73160 | AT1G73160 | 0        | 0         | 0        | 0        | 0        | 0.996841 | 1.778607 | 0        | 0        | 0        | 0         | 0         | 0.124069 | NA        | 0.253321 | NA       | 0        | NA       |
| AT1G73165 | CLE1      | 0        | 0         | 0        | 0        | 0        | 0        | 0        | 1.07889  | 0        | 0        | 1.330334  | 1.035907  | 0        | NA        | 0.179864 | NA       | 0.38345  | NA       |
| AT1G73170 | AT1G73170 | 781.1099 | 886.7703  | 851.1395 | 520.4685 | 484.926  | 545.2719 | 706.107  | 733.6452 | 588.6763 | 1025.744 | 948.5281  | 928.1722  | -0.69192 | 1.88E-08  | -0.30744 | 0.02445  | 0.20489  | 0.325972 |
| AT1G73175 | AT1G73175 | 0        | 0         | 0        | 0.824831 | 1.324935 | 1.993682 | 0        | 1.07889  | 0.976246 | 0.995936 | 1.330334  | 1.035907  | 0.703688 | NA        | 0.336223 | NA       | 0.559238 | NA       |
| AT1G73177 | BNS       | 16.64466 | 8.92123   | 6.438272 | 27.63184 | 27.82363 | 13.95577 | 16.00746 | 9.710009 | 29.28738 | 18.23118 | 46.56169  | 26.93357  | 0.898537 | 0.068813  | 0.594131 | 0.286278 | 1.20257  | 0.066962 |
| AT1G73180 | AT1G73180 | 219.9472 | 244.4417  | 242.079  | 228.0658 | 226.5638 | 227.2797 | 213.4328 | 221.1724 | 138.6269 | 207.2597 | 160.9704  | 249.6535  | -0.04734 | 0.0683423 | -0.29131 | 0.227164 | -0.18038 | 0.657308 |
| AT1G73190 | TIP3-1    | 10.70014 | 1.784246  | 4.510617 | 10.31039 | 9.274542 | 4.984204 | 5.335821 | 5.39445  | 16.59618 | 2.878607 | 3.991002  | 5.179533  | 0.332506 | 0.624175  | 0.41147  | 0.558496 | -0.0412  | NA       |
| AT1G73200 | AT1G73200 | 321.0041 | 340.791   | 306.4617 | 325.3959 | 306.0599 | 365.8406 | 361.9465 | 427.2404 | 323.3174 | 350.2305 | 270.0578  | 351.1273  | 0.040517 | 0.854206  | 0.197356 | 0.314809 | 0.011636 | 0.98194  |
| AT1G73210 | AT1G73210 | 45.17835 | 55.31163  | 46.35556 | 40.41673 | 34.88943 | 50.6093  | 60.9693  | 57.15851 | 32.3667  | 57.93953 | 58.53469  | 35.22082  | -0.15248 | 0.693837  | -0.04284 | 0.932526 | 0.098012 | 0.895902 |
| AT1G73220 | OCT1      | 20.21137 | 17.136984 | 11.58889 | 24.74493 | 31.13596 | 24.92102 | 9.782338 | 10.7889  | 26.35864 | 6.762625 | 14.63367  | 17.251346 | 0.875156 | 0.060888  | 0.18189  | 0.773127 | -0.38656 | 0.683683 |
| AT1G73230 | AT1G73230 | 1440.952 | 1521.962  | 1802.716 | 1828.238 | 1893.331 | 1592.952 | 1479.801 | 1427.371 | 1931.015 | 1767.465 | 1825.218  | 1760.1005 | 0.155475 | 0.370177  | 0.021299 | 0.922553 | 0.164648 | 0.556655 |
| AT1G73240 | AT1G73240 | 86.78999 | 74.98333  | 69.53333 | 64.74925 | 72.8714  | 58.81361 | 62.25124 | 56.10228 | 51.74104 | 66.20796 | 75.82904  | 63.1903   | -0.22464 | 0.384023  | -0.42871 | 0.099341 | -0.17693 | 0.707732 |
| AT1G73250 | GER1      | 117.7015 | 114.1917  | 90.1358  | 122.8998 | 141.1055 | 145.5388 | 104.0485 | 132.7035 | 138.6269 | 119.942  | 93.12338  | 97.37521  | 0.332546 | 0.133725  | 0.213952 | 0.400905 | -0.04221 | 0.940076 |
| AT1G73260 | ATK11     | 27.34479 | 35.68492  | 60.51975 | 372.4113 | 475.6515 | 521.3477 | 273.0162 | 230.8824 | 306.5412 | 0.595356 | 22.61568  | 12.43088  | 3.305647 | 1.47E-40  | 2.574591 | 2.04E-24 | -1.32216 | 0.000852 |
| AT1G73270 | SCPL6     | 3.566712 | 1.784246  | 2.575309 | 2.062078 | 0.662467 | 1.993682 | 1.778607 | 0.431556 | 0.976246 | 2.878607 | 0         | 4.143626  | -0.3975  | 0.59809   | -0.11061 | 0.900511 | -0.06764 | NA       |
| AT1G73280 | SCPL3     | 0        | 0         | 0        | 0        | 0        | 0.889303 | 0        | 0        | 0        | 0        | 0         | 0.2071813 | 0        | NA        | 0.133076 | NA       | 0.29577  | NA       |
| AT1G73290 | scpl5     | 0        | 1.784246  | 0        | 0.412416 | 0.662467 | 0.996841 | 2.66791  | 0        | 0        | 0.995936 | 1.330334  | 1.035907  | 0.046741 | 0.951858  | 0.20044  | 0.787337 | 0.209799 | NA       |
| AT1G73300 | SCPL2     | 0        | 3.568492  | 0        | 0.824831 | 1.324935 | 1.993682 | 1.778607 | 1.07889  | 0.976246 | 0.995936 | 2.660668  | 3.10772   | 0.106511 | 0.898054  | 0.109035 | 0.899235 | 0.459377 | NA       |
| AT1G73310 | SCPL4     | 59.4452  | 87.42806  | 74.68395 | 73.82239 | 72.20893 | 85.72831 | 11.8308  | 67.97007 | 81.02842 | 88.27728 | 121.0604  | 78.7289   | 0.067065 | 0.845942  | 0.254515 | 0.427433 | 0.364956 | 0.42129  |
| AT1G73320 | AT1G73320 | 59.4452  | 44.60615  | 54.08148 | 43.30364 | 53.65985 | 61.80413 | 48.91167 | 57.18117 | 25.3824  | 58.53167 | 55.87403  | 46.61579  | -0.02264 | 0.956415  | -0.26394 | 0.483737 | 0.013016 | 0.988816 |
| AT1G73325 | AT1G73325 | 5.94452  | 8.92123   | 11.58889 | 8.248311 | 6.246733 | 7.974726 | 16.89677 | 12.94668 | 25.3824  | 22.06932 | 59.91002  | 15.5386   | -0.19829 | 0.747555  | 0.878672 | 0.087988 | 1.238841 | NA       |
| AT1G73330 | ATDR4     | 53.00684 | 26.76369  | 32.19136 | 116.7136 | 99.37009 | 92.70619 | 98.71269 | 122.9935 | 143.5082 | 80.60099 | 102.4357  | 114.9856  | 1.345707 | 3.39E-07  | 1.567296 | 2.68E-09 | 1.283562 | 4.71E-05 |
| AT1G73340 | AT1G73340 | 1.188904 | 0         | 0        | 0.412416 | 0.662467 | 0.996841 | 0.889303 | 0        | 0.928738 | 0        | 1.330334  | 1.035907  | 0.079991 | NA        | 0.397175 | NA       | 0.143078 | NA       |
| AT1G73350 | AT1G73350 | 160.502  | 148.0924  | 144.2173 | 247.3069 | 296.1229 | 220.3018 | 211.6542 | 215.778  | 313.375  | 176.5546 | 192.8984  | 192.6786  | 0.734113 | 0.00209   | 0.688274 | 0.000771 | 0.298914 | 0.332253 |
| AT1G73360 | HDG11     | 49.93397 | 35.68492  | 43.78025 | 27.19443 | 26.49869 | 33.89259 | 23.34701 | 36.68226 | 34.16861 | 50.85539 | 38.57969  | 49.72351  | -0.36895 | 0.059262  | -0.68976 | 0.28357  | 0.094859 | 0.889394 |
| AT1G73370 | SUS6      | 65.38972 | 51.74313  | 66.95803 | 29.69392 | 38.4231  | 36.88311 | 37.35075 | 32.3667  | 36.1211  | 65.24842 | 66.5167   | 66.29802  | -0.80822 | 0.001528  | -0.76944 | 0.005043 | 0.08951  | 0.879636 |
| AT1G73380 | AT1G73380 | 101.0568 | 114.1917  | 87.5605  | 137.334  | 126.5312 | 127.9556 | 149.403  | 158.5968 | 160.1043 | 115.1443 | 78.4897   | 109.1294  | 0.374539 | 0.06948   | 0.621762 | 0.001968 | 0.011241 | 0.985661 |
| AT1G73390 | AT1G73390 | 256.8033 | 264.0684  | 328.3519 | 297.764  | 253.0625 | 273.1344 | 251.6729 | 223.3302 | 185.4867 | 272.5081 | 339.2352  | 292.6586  | -0.04199 | 0.862526  | -0.35559 | 0.066856 | 0.082588 | 0.837385 |
| AT1G73400 | AT1G73400 | 41.61164 | 39.25341  | 39.91728 | 24.33252 | 19.21155 | 24.92102 | 35.57214 | 20.49891 | 18.54867 | 33.58375 | 37.24935  | 49.72351  | -0.76241 | 0.022728  | -0.62976 | 0.0857   | -0.00096 | 0.998668 |
| AT1G73410 | ATMYB54   | 5.94452  | 0         | 0.862963 | 1.237247 | 1.324935 | 0.996841 | 2.66791  | 0        | 0.95536  | 0        | 0.2071813 | 0         | -0.7246  | 0.296372  | -0.53364 | 0.481339 | -0.75244 | NA       |
| AT1G73430 | AT1G73430 | 449.4057 | 405.0238  | 439.0901 | 370.7616 | 384.231  | 428.6415 | 447.3197 | 418.6093 | 273.3489 | 400.1264 | 496.2146  | 356.3158  | -0.12857 | 0.589162  | -0.17964 | 0.459003 | -0.04932 | 0.920659 |
| AT1G73440 | AT1G73440 | 93.92341 | 103.4863  | 110.7383 | 106.8156 | 116.3942 | 120.6177 | 96.93408 | 101.4157 | 132.7695 | 121.861  | 113.0784  | 121.2011  | 0.149372 | 0.526267  | 0.102101 | 0.704606 | 0.207683 | 0.586265 |
| AT1G73445 | AT1G73445 | 4.755616 | 0         | 2.575309 | 6.598649 | 6.624673 | 4.984204 | 3.557214 | 2.15778  | 11.71495 | 11.51443 | 6.65167   | 6.215439  | 0.712271 | 0.273608  | 0.652762 | 0.352169 | 1.013002 | NA       |
| AT1G73450 | AT1G73450 | 244.9142 | 201.6198  | 197.0111 | 133.6226 | 126.5312 | 146.5356 | 145.4858 | 145.6501 | 102.5058 | 165.0401 | 212.8534  | 185.4273  | -0.65462 | 0.000565  | -0.69395 | 0.000415 | -0.19664 | 0.586265 |
| AT1G73460 | AT1G73460 | 455.3502 | 372.9794  | 379.858  | 246.2121 | 210.0021 | 308.0238 | 295.8448 | 346.3237 | 206.9642 | 379.0166 | 393.7789  | 393.6245  | -0.49877 | 0.001249  | -0.49877 | 0.001249 | -0.05155 | 0.920201 |
| AT1G73470 | AT1G73470 | 388.7716 | 458.5512  | 490.9663 | 299.8262 | 271.6116 | 283.1028 | 289.9129 | 330.1403 | 308.9437 | 537.34   | 464.2866  | 426.7935  | -0.63305 | 1.49E-05  | -0.51816 | 0.000713 | 0.09675  | 0.757425 |
| AT1G73480 | AT1G73480 | 924.9673 | 1018.804  | 1006.946 | 640.8938 | 543.8856 | 669.877  | 603.8371 | 617.125  | 343.6386 | 968.1714 | 760.951   | 862.9101  | -0.65119 | 0.001471  | -0.8889  | 1.06E-05 | -0.1803  | 0.649117 |
| AT1G73490 | AT1G73490 | 384.016  | 403.2396  | 445.5284 | 623.9848 | 629.3439 | 611.0634 | 535.3607 | 463.9227 | 464.6931 | 389.5715 | 473.5989  | 468.2298  | 0.590122 | 6.57E-06  | 0.245773 | 0.106376 | 0.106402 | 0.701857 |
| AT1G73500 | MKK9      | 90.3567  | 105.2705  | 86.27284 | 293.2225 | 276.9113 | 322.9764 | 335.2674 | 340.9292 | 481.2893 | 67.16749 | 73.16837  | 61.11849  | 1.623417 | 2.44E-17  | 1.99174  | 1.15E-25 | -0.46167 | 0.185983 |
| AT1G73510 | AT1G73510 | 1.188904 | 0         | 1.287654 | 0.824831 | 1.324935 | 0.996841 | 0        | 3.23667  | 2.928738 | 0        | 0         | 1.035907  | 0.062072 | 0.939775  | 0.054749 | 0.527023 | -0.27419 | NA       |
| AT1G73530 | AT1G73530 | 135.535  | 157.0137  | 155.8062 | 214.0437 | 198.0777 | 193.3871 | 149.403  | 183.4113 | 235.2753 | 198.6239 | 139.6851  | 211.3249  | 0.426176 | 0.056168  | 0.332293 | 0.171444 | 0.94375  | 0.432866 |

|           |           |          |          |          |          |          |          |          |          |          |          |          |           |           |          |           |          |          |          |
|-----------|-----------|----------|----------|----------|----------|----------|----------|----------|----------|----------|----------|----------|-----------|-----------|----------|-----------|----------|----------|----------|
| AT1G74010 | AT1G74010 | 3.566712 | 10.70548 | 11.58889 | 58.1506  | 62.27192 | 69.77885 | 55.13682 | 39.91893 | 41.97858 | 5.757214 | 14.63367 | 8.287252  | 2.578937  | 1.75E-12 | 2.132966  | 1.93E-08 | 0.071333 | 0.952547 |
| AT1G74020 | SSL12     | 55.87849 | 66.0171  | 77.25926 | 239.6134 | 260.3496 | 268.1502 | 261.4552 | 251.3814 | 231.3703 | 71.00564 | 83.81104 | 54.90305  | 1.893447  | 3.19E-24 | 1.851496  | 1.15E-22 | 0.057835 | 0.917881 |
| AT1G74030 | EN01      | 102.2457 | 74.93833 | 113.3136 | 89.08176 | 87.44568 | 109.6525 | 46.24378 | 71.20674 | 71.12343 | 110.3466 | 81.15037 | 97.370521 | -0.04227  | 0.898718 | -0.57129  | 0.034513 | -0.03135 | 0.986206 |
| AT1G74040 | IPMS2     | 369.7491 | 421.0821 | 378.5704 | 203.3209 | 197.4152 | 241.2355 | 282.7985 | 277.2747 | 260.6577 | 358.8663 | 364.5115 | 390.5368  | -0.85978  | 8.14E-11 | -0.49933  | 0.000405 | -0.0642  | 0.839654 |
| AT1G74045 | TE117     | 0        | 0        | 0        | 0        | 0        | 0        | 0        | 0        | 0        | 0        | 0        | 0         | #N/A      | #N/A     | #N/A      | #N/A     | #N/A     | #N/A     |
| AT1G74050 | RPL6C     | 1739.366 | 1787.815 | 1921.18  | 1943.715 | 2241.789 | 1909.947 | 1807.065 | 1917.187 | 2709.083 | 1774.181 | 1737.416 | 1963.043  | 0.159113  | 0.399747 | 0.235401  | 0.208727 | 0.006936 | 0.988816 |
| AT1G74055 | AT1G74055 | 9.511232 | 3.568492 | 9.01358  | 6.186234 | 4.637271 | 4.984204 | 2.66791  | 2.15778  | 4.88123  | 5.757214 | 11.97301 | 11.39497  | -0.385    | 0.54746  | -0.85697  | 0.176551 | 0.268868 | NA       |
| AT1G74060 | RPL6B     | 947.5564 | 1004.531 | 1033.986 | 1065.269 | 1191.116 | 998.8345 | 822.6057 | 941.8709 | 1638.141 | 859.7439 | 702.4163 | 972.7162  | 0.1206    | 0.672194 | 0.18186   | 0.526269 | -0.22696 | 0.59678  |
| AT1G74070 | CYP26-2   | 345.971  | 312.2431 | 342.5161 | 184.3498 | 135.8058 | 156.504  | 187.643  | 189.8846 | 260.6577 | 375.1784 | 328.5925 | 374.9982  | -1.04187  | 1.64E-09 | -0.63709  | 0.000496 | 0.106129 | 0.781222 |
| AT1G74080 | MYB122    | 0        | 0        | 1.287654 | 9.073143 | 9.937009 | 6.977885 | 15.11816 | 9.710009 | 15.61994 | 0        | 0        | 0         | 2.029597  | 0.000471 | 2.540664  | 9.29E-06 | -0.38415 | NA       |
| AT1G74088 | AT1G74088 | 19.02246 | 35.68492 | 25.75309 | 44.9533  | 41.07297 | 41.86731 | 28.45771 | 21.5778  | 24.40615 | 29.7456  | 26.60668 | 23.82585  | 0.670956  | 0.039713 | -0.06308  | 0.895547 | 0.032255 | 0.973083 |
| AT1G74090 | SOT18     | 712.1535 | 456.767  | 545.9654 | 325.3959 | 346.4704 | 317.9922 | 345.0498 | 363.5859 | 451.0256 | 620.8196 | 569.3829 | 613.2567  | -0.78122  | 4.91E-06 | -0.5582   | 0.001954 | 0.066825 | 0.870242 |
| AT1G74100 | SOT16     | 479.1283 | 447.8458 | 506.0482 | 697.3947 | 718.777  | 766.7056 | 1024.478 | 911.662  | 1183.21  | 427.9529 | 453.6439 | 482.7324  | 0.59503   | 7.94E-06 | 1.106671  | 4.8E-18  | -0.073   | 0.814647 |
| AT1G74110 | CYP78A10  | 0        | 0        | 0        | 0.412416 | 0        | 0        | 0        | 0        | 0.972646 | 0        | 0        | 0.1035907 | 0.065653  | NA       | 0.157247  | NA       | 0.168331 | NA       |
| AT1G74120 | AT1G74120 | 70.14533 | 66.0171  | 56.65679 | 44.9533  | 57.63465 | 58.81361 | 57.80473 | 66.89118 | 43.93110 | 48.93632 | 78.4897  | 58.01077  | -0.25984  | 0.396402 | -0.18605  | 0.590315 | -0.06798 | 0.920546 |
| AT1G74130 | AT1G74130 | 1.188904 | 0        | 0        | 0.824831 | 0        | 0.996841 | 0.889303 | 2.15778  | 0        | 2.878607 | 0        | 2.071813  | 0.028181  | 0.970721 | 0.242334  | 0.742239 | 0.529654 | NA       |
| AT1G74140 | AT1G74140 | 1.188904 | 0        | 0        | 0.248311 | 10.59948 | 7.974726 | 1.778607 | 1.07889  | 0.972646 | 0        | 0        | 0         | 2.2415    | 0.000184 | 0.340045  | 0.670578 | -0.33071 | NA       |
| AT1G74150 | AT1G74150 | 9.511232 | 19.62671 | 12.87654 | 9.073143 | 7.949607 | 12.95893 | 9.782338 | 15.10446 | 14.64369 | 8.635821 | 11.97301 | 9.323159  | -0.40682  | 0.433837 | -0.03956  | 0.951719 | -0.38382 | NA       |
| AT1G74160 | AT1G74160 | 548.0847 | 358.6335 | 394.0222 | 171.5649 | 184.8284 | 208.3397 | 280.1306 | 276.1958 | 178.653  | 371.3403 | 375.1542 | 359.4596  | -1.17845  | 2.92E-09 | -0.80416  | 0.000105 | -0.23201 | 0.540008 |
| AT1G74170 | AiRPL13   | 214.0027 | 171.2876 | 230.4901 | 233.4272 | 237.1633 | 284.0996 | 219.658  | 242.7502 | 184.5103 | 193.8262 | 191.5681 | 194.7504  | 0.058937  | 0.147072 | 0.058937  | 0.810984 | -0.09323 | 0.812961 |
| AT1G74180 | AiRPL14   | 111.577  | 99.91778 | 105.5877 | 55.26369 | 53.65985 | 54.82624 | 78.25871 | 75.5223  | 48.8123  | 79.64146 | 82.48071 | 81.83662  | -0.92625  | 1.92E-05 | -0.62888  | 0.007251 | -0.37178 | 0.307324 |
| AT1G74190 | AiRPL15   | 0        | 1.784246 | 1.287654 | 0        | 0        | 1.993682 | 0        | 1.07889  | 0        | 0        | 0        | 2.071813  | -0.15539  | NA       | -0.2575   | NA       | -0.09253 | NA       |
| AT1G74200 | AiRPL16   | 19.02246 | 44.60615 | 16.73951 | 40.41673 | 47.69764 | 46.85152 | 40.90796 | 39.91893 | 29.28738 | 15.35257 | 13.30334 | 18.64632  | 0.745674  | 0.036209 | 0.473955  | 0.244735 | -0.61017 | 0.326361 |
| AT1G74205 | AT1G74205 | 0        | 0        | 5.150617 | 1.649662 | 0.662467 | 0.996841 | 2.66791  | 2.15778  | 0        | 0.99536  | 0        | 2.071813  | -0.23275  | 0.760965 | -0.0447   | 0.958512 | -0.25306 | NA       |
| AT1G74210 | GDOP5     | 159.3131 | 189.1301 | 181.5593 | 375.2982 | 363.0321 | 353.8785 | 253.4515 | 237.3558 | 190.368  | 204.3811 | 198.2198 | 149.1705  | 1.029411  | 8.19E-10 | 0.359307  | 0.06924  | 0.059672 | 0.892467 |
| AT1G74220 | AT1G74220 | 0        | 0        | 0        | 0.662467 | 0        | 0.889303 | 1.07889  | 0.972646 | 0        | 1.330334 | 0        | 0         | 0.080865  | NA       | 0.526273  | NA       | 0.210243 | NA       |
| AT1G74230 | RBG5      | 482.695  | 438.9245 | 408.1864 | 593.8784 | 616.757  | 463.531  | 377.0647 | 405.6626 | 698.0159 | 371.3403 | 321.9408 | 369.8186  | 0.322899  | 0.186996 | 0.149341  | 0.60362  | -0.31093 | 0.425471 |
| AT1G74240 | AT1G74240 | 36.85602 | 23.1952  | 21.89012 | 37.52982 | 30.47349 | 46.85152 | 26.6791  | 30.20892 | 27.33489 | 30.70514 | 25.27635 | 25.89766  | 0.41981   | 0.240051 | 0.012558  | 0.979651 | -0.01528 | 0.988019 |
| AT1G74250 | AT1G74250 | 441.0834 | 392.5341 | 321.9136 | 312.1986 | 334.54   | 301.0459 | 321.1455 | 347.4026 | 428.572  | 294.5774 | 313.9588 | 326.3106  | -0.08598  | 0.121396 | -0.08158  | 0.700832 | -0.30076 | 0.271055 |
| AT1G74260 | PUR4      | 946.3675 | 628.0546 | 516.3494 | 222.292  | 224.5764 | 324.9701 | 291.6915 | 366.8226 | 384.8524 | 436.5887 | 453.6439 | 498.271   | -1.39632  | 8.26E-11 | -1.03932  | 0.262-06 | -0.57223 | 0.070883 |
| AT1G74270 | RPL35AC   | 145.0463 | 123.113  | 166.1074 | 270.1322 | 286.1859 | 202.3587 | 171.6356 | 169.3857 | 382.6884 | 90.19635 | 114.4087 | 208.2172  | 0.742658  | 0.029873 | 0.67702   | 0.059168 | -0.06974 | 0.935197 |
| AT1G74280 | AT1G74280 | 41.61164 | 64.23286 | 39.91728 | 115.8888 | 106.6572 | 112.643  | 88.93035 | 81.99564 | 85.90965 | 48.93632 | 59.86503 | 65.26211  | 1.191786  | 1.3E-07  | 0.1815909 | 0.000892 | 0.268324 | 0.567588 |
| AT1G74290 | AT1G74290 | 21.40027 | 28.54794 | 21.89012 | 30.93117 | 23.84882 | 30.90206 | 19.56468 | 24.81447 | 21.47741 | 33.58375 | 21.28534 | 23.82585  | 0.25477   | 0.528445 | -0.10248  | 0.837979 | 0.154147 | 0.850794 |
| AT1G74300 | AT1G74300 | 52.31177 | 58.80012 | 54.08148 | 107.6405 | 99.37009 | 98.68724 | 69.35667 | 70.12785 | 71.26596 | 34.54328 | 22.61568 | 51.79533  | 0.867137  | 0.000845 | 0.341456  | 0.248079 | -0.53799 | 0.205441 |
| AT1G74310 | CLP81     | 116.5126 | 101.702  | 75.97161 | 70.11065 | 58.29712 | 77.75358 | 61.36194 | 59.33895 | 69.31347 | 102.6703 | 86.47171 | 106.6984  | -0.50278  | 0.031446 | -0.60649  | 0.014218 | 0.014025 | 0.983741 |
| AT1G74320 | F1017.1   | 229.4585 | 248.0102 | 242.079  | 241.6755 | 239.1507 | 245.2228 | 318.3706 | 321.5092 | 215.5704 | 259.0746 | 316.6195 | 294.1975  | 0.013743  | 0.956282 | 0.246227  | 0.234705 | 0.026675 | 0.378772 |
| AT1G74330 | AT1G74330 | 89.1678  | 92.78079 | 81.12222 | 113.8267 | 84.13334 | 151.5198 | 128.949  | 137.019  | 91.76712 | 91.15588 | 93.12338 | 97.37521  | 0.38335   | 0.153438 | 0.42647   | 0.127679 | 0.096248 | 0.872888 |
| AT1G74340 | AT1G74340 | 117.7015 | 128.4657 | 121.0395 | 229.3031 | 204.7024 | 161.4882 | 152.9602 | 162.9124 | 164.0093 | 128.5778 | 150.3277 | 119.1293  | 0.698605  | 0.00207  | 0.37868   | 0.076833 | 0.110149 | 0.978669 |
| AT1G74350 | AT1G74350 | 20.21137 | 17.84246 | 16.73951 | 26.80701 | 17.88662 | 28.90838 | 29.34701 | 26.97225 | 16.61994 | 18.23118 | 17.29434 | 27.96948  | 0.369078  | 0.40029  | 0.344221  | 0.47452  | 0.187812 | 0.836364 |
| AT1G74360 | AT1G74360 | 65.38972 | 82.07532 | 46.35556 | 198.7843 | 141.768  | 242.2323 | 184.9751 | 234.1191 | 176.7005 | 31.66468 | 29.26735 | 50.75942  | -0.159857 | 6.62E-09 | 1.552044  | 4.1E-09  | -0.71262 | 0.100977 |
| AT1G74370 | AT1G74370 | 215.1916 | 276.5581 | 258.8185 | 209.0947 | 225.2389 | 206.346  | 251.6729 | 240.5925 | 239.1803 | 237.9648 | 236.7994 | 217.5404  | -0.21579  | 0.184886 | -0.02738  | 0.989257 | -0.10695 | 0.374334 |
| AT1G74380 | GT5       | 460.1058 | 503.1574 | 441.6654 | 314.6731 | 332.5586 | 422.6605 | 326.3744 | 430.4771 | 393.4271 | 365.5831 | 419.0552 | 424.7217  | -0.39119  | 0.021782 | -0.2828   | 0.128796 | -0.21126 | 0.474444 |
| AT1G74390 | NEN3      | 64.20081 | 82.07532 | 68.24568 | 67.63615 | 67.57166 | 59.81045 | 60.47264 | 93.86342 | 59.55101 | 80.60099 | 65.18636 | 74.58257  | -0.11265  | 0.171219 | 0.000106  | 0.999892 | 0.056167 | 0.930364 |
| AT1G74400 | PCMP-6E8  | 9.511232 | 10.70548 | 14.1642  | 19.79955 | 25.17376 | 9.968408 | 22.23259 | 25.89336 | 27.33489 | 10.55489 | 15.96401 | 16.5745   | 0.602291  | 0.193021 | 0.974876  | 0.031175 | 0.249482 | 0.794084 |
| AT1G74410 | ATL24     | 68.95643 | 57.09587 | 66.95803 | 10.32323 | 100.695  | 134.5735 | 124.5025 | 118.6779 | 117.1495 | 74.84378 | 82.48071 | 53.86714  | 0.876587  | 8.38E-05 | 0.857708  | 0.000199 | 0.103638 | 0.853259 |
| AT1G74420 | FUT3      | 21.40027 | 14.27397 | 19.31482 | 13.72747 | 9.937009 | 2.990522 | 13.33955 | 10.7889  | 7.809968 | 14.39303 | 14.63367 | 31.0772   | -0.87465  | 0.072039 | -0.66013  | 0.219302 | 0.103831 | NA       |
| AT1G74430 | MYB95     | 28.53369 | 21.41095 | 38.62963 | 61.03751 | 54.32232 | 60.80729 | 67.58706 | 63.65451 | 65.40848 | 42.21957 | 35.91902 | 27.96948  | 0.908921  | 0.001231 | 1.060243  | 0.000201 | 0.214736 | 0.730349 |
| AT1G74440 | AT1G74440 | 76.08985 | 67.80135 | 72.10864 | 209.0947 | 234.5134 | 180.4282 | 118.2774 | 124.0723 | 153.7206 | 56.6126  | 57.20436 | 54.90305  | 1.489608  | 2.31E-14 | 0.838162  | 8.67E-05 | -0.34975 | 0.373178 |
| AT1G74448 | AT1G74448 | 0        | 0        | 0        | 0        | 0        | 0        | 0        | 0        | 0.976246 | 0        | 0        | 0         | 0         | NA       | 0.16673   | NA       | 0.07133  | NA       |
| AT1G74450 | AT1G74450 | 209.2471 | 248.0102 | 261.3398 | 239.6134 | 259.6872 | 593.1203 | 526.4677 | 579.3639 | 840.5478 | 220.6932 | 224.8264 | 187.4991  | 0.560407  | 0.0757   | 1.351897  | 0.000003 | -0.17123 | 0.79119  |

|           |           |          |            |          |          |          |          |           |          |          |          |          |           |           |          |          |           |           |          |
|-----------|-----------|----------|------------|----------|----------|----------|----------|-----------|----------|----------|----------|----------|-----------|-----------|----------|----------|-----------|-----------|----------|
| AT1G74950 | TIFY10B   | 381.6382 | 358.6335   | 357.9679 | 494.8987 | 618.082  | 619.0381 | 818.1592  | 773.5641 | 707.7783 | 374.2189 | 353.8688 | 347.0287  | 0.642144  | 2.77E-06 | 1.051221 | 2.42E-15  | -0.03125  | 0.933811 |
| AT1G74960 | KAS2      | 1360.106 | 1388.143   | 1310.832 | 800.4986 | 768.462  | 865.2578 | 1033.371  | 1007.683 | 802.4742 | 1279.061 | 1173.355 | 1294.883  | -0.73092  | 1.65E-09 | -0.50741 | 5.99E-05  | -0.11279  | 0.645841 |
| AT1G74970 | RPS9      | 1947.425 | 1771.756   | 1776.963 | 962.578  | 1028.812 | 932.0461 | 1119.633  | 1248.276 | 1889.036 | 1900.84  | 1901.047 | 1775.544  | -0.89126  | 2.38E-07 | -0.36112 | 0.063541  | 0.02049   | 0.967025 |
| AT1G74990 | AT1G74990 | 0        | 0          | 0        | 0        | 0.662467 | 0        | 0.889303  | 0        | 0.976246 | 0        | 0        | 0         | 0.109442  | NA       | 0.323202 | NA        | 0         | NA       |
| AT1G75000 | AT1G75000 | 16.64466 | 28.54794   | 20.60247 | 23.50769 | 29.81103 | 23.92418 | 41.79726  | 40.99782 | 34.16861 | 12.47396 | 22.61568 | 15.5386   | 0.239835  | 0.566315 | 0.800461 | 0.029978  | -0.33472  | 0.644822 |
| AT1G75010 | ARC3      | 256.8033 | 274.7739   | 235.6407 | 200.434  | 184.1659 | 185.4124 | 265.0124  | 262.1703 | 211.8454 | 289.7798 | 250.1028 | 332.526   | -0.41386  | 0.015412 | -0.04925 | 0.834127  | 0.189924  | 0.53238  |
| AT1G75020 | LPAT4     | 82.03437 | 94.56504   | 68.24568 | 145.9951 | 149.1716 | 169.6429 | 173.4142  | 175.8591 | 174.748  | 65.24842 | 74.4987  | 94.26749  | 0.905806  | 3.79E-06 | 1.080445 | 3.67E-08  | -0.05224  | 0.92514  |
| AT1G75030 | ATL-3     | 13.07794 | 14.27397   | 16.23951 | 12.37247 | 10.59948 | 8.971567 | 7.114428  | 10.7889  | 8.57476  | 17.27164 | 6.65167  | 7.251346  | -0.367591 | 0.502207 | -0.73885 | 0.17314   | -0.38434  | NA       |
| AT1G75040 | PRS       | 246.1031 | 421.0821   | 275.558  | 1200.542 | 1056.635 | 958.9608 | 771.9154  | 1045.444 | 1246.666 | 80.60099 | 79.82004 | 72.51346  | 1.723609  | 1.14E-16 | 1.653976 | 2.39E-15  | -1.91234  | 1.56E-15 |
| AT1G75050 | AT1G75050 | 0        | 0          | 2.575309 | 0        | 1.324935 | 0.996841 | 0         | 0        | 0        | 0        | 0        | 0.1035907 | -0.03402  | NA       | -0.41982 | NA        | -0.22317  | NA       |
| AT1G75060 | AT1G75060 | 34.47821 | 35.68492   | 38.62963 | 60.21267 | 51.00998 | 37.87995 | 52.46891  | 49.62894 | 53.69353 | 59.49121 | 58.53469 | 60.08258  | 0.458035  | 0.118725 | 0.487161 | 0.11901   | 0.671381  | 0.093479 |
| AT1G75070 | AT1G75070 | 0        | 0          | 0        | 0        | 0        | 0        | 0         | 0        | 0        | 0        | 0        | 0         | #N/A      | #N/A     | #N/A     | #N/A      | #N/A      | #N/A     |
| AT1G75080 | BZR1      | 321.0041 | 287.2636   | 239.5037 | 225.1789 | 214.6394 | 260.1754 | 234.7761  | 257.8547 | 215.7504 | 251.3983 | 256.7545 | 213.3967  | -0.27751  | 0.123095 | -0.25586 | 0.186673  | -0.23038  | 0.438107 |
| AT1G75090 | AT1G75090 | 29.7226  | 26.76369   | 21.89012 | 25.56977 | 25.83622 | 25.91786 | 37.35075  | 29.13003 | 36.1211  | 32.62421 | 34.58868 | 22.78994  | -0.02432  | 0.957417 | 0.364652 | 0.348711  | -0.174525 | 0.811605 |
| AT1G75100 | JAC1      | 1014.135 | 1052.705   | 968.3161 | 548.9251 | 525.999  | 523.3414 | 356.0107  | 265.4069 | 160.1043 | 947.0617 | 1021.696 | 926.1004  | -0.8969   | 0.000113 | -1.8922  | 3.1E-21   | 0.066058  | 0.895329 |
| AT1G75110 | RAA2      | 27.34479 | 33.90067   | 38.62963 | 16.08421 | 19.21155 | 22.92734 | 18.67537  | 14.02557 | 18.54867 | 34.54328 | 30.59768 | 30.04129  | -0.74712  | 0.028892 | -0.86631 | 0.018391  | -0.05254  | 0.953003 |
| AT1G75120 | RAA1      | 68.95643 | 66.0171    | 46.35556 | 72.58514 | 63.59686 | 78.75042 | 59.58333  | 63.65451 | 56.62227 | 58.53167 | 49.22236 | 72.51346  | 0.235311  | 0.408039 | -0.00857 | 0.981309  | 0.005168  | 0.993998 |
| AT1G75130 | CYP721A1  | 215.1916 | 224.815    | 187.9975 | 178.1635 | 187.4782 | 157.5008 | 128.949   | 128.3879 | 141.5557 | 135.2945 | 121.0604 | 162.6373  | -0.248    | 1.182994 | -0.63704 | 0.000356  | -0.56186  | 0.014539 |
| AT1G75140 | AT1G75140 | 196.1692 | 194.4828   | 177.6963 | 164.5538 | 167.6042 | 195.3808 | 176.9714  | 190.9635 | 150.3419 | 122.8206 | 146.3367 | 146.06328 | -0.11273  | 0.585778 | -0.13034 | 0.552297  | -0.44637  | 0.077133 |
| AT1G75150 | AT1G75150 | 89.1678  | 58.88012   | 84.98519 | 61.86234 | 47.69764 | 63.79781 | 56.91542  | 46.39227 | 43.93107 | 108.4275 | 137.0244 | 96.33931  | -0.42938  | 0.1061   | -0.64486 | 0.018351  | 0.508167  | 0.17126  |
| AT1G75160 | AT1G75160 | 0        | 0          | 0        | 0        | 0        | 0        | 0         | 0        | 0        | 0        | 0        | 0         | #N/A      | #N/A     | #N/A     | #N/A      | #N/A      | #N/A     |
| AT1G75163 | AT1G75163 | 16.64466 | 21.41095   | 11.58889 | 13.1973  | 10.59948 | 11.96209 | 15.56095  | 14.02557 | 9.76246  | 18.23118 | 15.96401 | 13.46678  | -0.37964  | 0.429312 | -0.40358 | 0.439605  | -0.02168  | NA       |
| AT1G75166 | AT1G75166 | 16.64466 | 7.136984   | 14.1642  | 20.20836 | 15.23675 | 16.94629 | 21.34328  | 10.7889  | 8.786214 | 22.06932 | 10.64267 | 12.43088  | 0.370133  | 0.480008 | 0.0638   | 0.923388  | 0.190814  | NA       |
| AT1G75170 | AT1G75170 | 80.84547 | 128.4657   | 95.28642 | 121.678  | 259.6872 | 231.2671 | 234.7761  | 198.5157 | 211.8454 | 112.2657 | 97.11438 | 109.8061  | 1.210985  | 3.37E-11 | 1.079733 | 9.24E-09  | 0.092144  | 0.847794 |
| AT1G75180 | AT1G75180 | 771.5987 | 874.2806   | 821.5235 | 647.08   | 666.4421 | 679.8454 | 566.4863  | 490.8949 | 510.5776 | 806.9695 | 756.96   | 834.9407  | -0.30384  | 0.008216 | -0.64403 | 6.51E-09  | -0.0362   | 0.894225 |
| AT1G75190 | AT1G75190 | 164.0687 | 185.5616   | 191.8605 | 280.855  | 263.662  | 243.2291 | 221.6542  | 240.5925 | 475.4318 | 186.1499 | 164.9614 | 191.6427  | 0.518419  | 0.058479 | 0.741814 | 0.005916  | 0.00546   | 0.993903 |
| AT1G75200 | TYW1      | 224.7028 | 185.5616   | 178.984  | 203.7333 | 155.6798 | 232.2639 | 156.5174  | 142.4135 | 141.5557 | 114.847  | 121.0604 | 136.7397  | -0.02698  | 0.992335 | -0.41161 | 0.054813  | -0.64934  | 0.011485 |
| AT1G75210 | AT1G75210 | 471.9949 | 458.5512   | 457.1173 | 324.5711 | 365.6819 | 331.948  | 384.1791  | 348.4815 | 316.3037 | 411.6408 | 440.3405 | 515.8815  | -0.43623  | 0.002181 | -0.39765 | 0.007738  | -0.02065  | 0.957197 |
| AT1G75220 | AT1G75220 | 860.7665 | 956.3559   | 873.0296 | 741.1108 | 860.545  | 990.8597 | 1144.534  | 1050.839 | 1086.562 | 1141.847 | 1093.534 | 1085.63   | -0.05581  | 0.740932 | 0.285771 | 0.043217  | 0.302542  | 0.114673 |
| AT1G75230 | AT1G75230 | 98.67903 | 96.34929   | 70.82099 | 86.60727 | 101.3575 | 77.75358 | 97.82338  | 96.0212  | 81.02842 | 73.88424 | 79.82004 | 62.15439  | 0.010057  | 0.974102 | 0.051406 | 0.873303  | -0.29058  | 0.483716 |
| AT1G75240 | ZHD5      | 233.0252 | 155.2294   | 193.1482 | 216.5182 | 216.6268 | 185.4124 | 126.8121  | 134.8612 | 171.8193 | 187.1094 | 196.8894 | 167.8169  | 0.08139   | 0.739601 | -0.42637 | 0.044686  | -0.08694  | 0.848479 |
| AT1G75250 | RL6       | 24.96698 | 30.33218   | 33.47901 | 15.25938 | 19.87402 | 11.96209 | 20.45398  | 7.55223  | 27.33489 | 26.867   | 31.92802 | 33.14901  | -0.79945  | 0.044161 | -0.52616 | 0.191899  | 0.050299  | 0.961209 |
| AT1G75260 | AT1G75260 | 9.511232 | 12.48972   | 24.46543 | 6.598649 | 2.649869 | 1.993682 | 4.446517  | 6.47334  | 10.73871 | 11.51443 | 9.312338 | 13.46678  | -1.49353  | 0.003927 | -0.88319 | 0.121499  | -0.35055  | NA       |
| AT1G75261 | AT1G75261 | 0        | 0          | 0        | 0.412416 | 0.662467 | 0        | 0         | 0        | 0        | 0        | 0        | 0         | 0.196313  | NA       | 0        | NA        | 0         | NA       |
| AT1G75270 | DHAR2     | 122.4571 | 158.7979   | 184.1346 | 235.9017 | 251.0751 | 239.2418 | 183.1965  | 165.0702 | 269.4439 | 209.1788 | 214.1838 | 171.9605  | 0.624216  | 0.004501 | 0.398314 | 0.102405  | 0.344331  | 0.345578 |
| AT1G75280 | AT1G75280 | 693.131  | 783.284    | 759.7161 | 362.5133 | 362.3696 | 308.0238 | 393.0721  | 311.7992 | 388.5459 | 790.6574 | 768.933  | 723.0268  | -1.09287  | 1.48E-17 | -0.10476 | 8.28E-15  | 0.03145   | 0.927039 |
| AT1G75290 | AT1G75290 | 4.755616 | 0          | 2.575309 | 6.598649 | 3.312336 | 0.996841 | 3.572714  | 0        | 1.952492 | 1.919071 | 5.321336 | 3.10772   | -0.32717  | 0.670844 | -0.22993 | 0.787874  | 0.185923  | NA       |
| AT1G75295 | AT1G75295 | 13.07794 | 8.91213    | 12.87654 | 21.85803 | 26.49869 | 15.94945 | 17.78607  | 10.7889  | 20.50117 | 20.15025 | 23.94601 | 12.43088  | 0.755428  | 0.088176 | 0.39518  | 0.456862  | 0.552874  | 0.469967 |
| AT1G75300 | AT1G75300 | 3.566712 | 0          | 3.862963 | 2.062078 | 3.312336 | 1.993682 | 0.889303  | 3.23667  | 0        | 1.919071 | 2.660668 | 8.287252  | -0.05626  | 0.94879  | -0.44503 | 0.569483  | 0.414519  | NA       |
| AT1G75310 | AUL1      | 447.0279 | 301.5376   | 305.1741 | 199.6091 | 175.5538 | 264.1628 | 259.6766  | 276.1958 | 250.8592 | 279.2249 | 340.5655 | 302.4847  | -0.71447  | 0.000363 | -0.41531 | 0.059866  | -0.19426  | 0.612836 |
| AT1G75330 | OTC       | 567.1072 | 547.7635   | 506.0482 | 508.096  | 491.5507 | 474.4962 | 500.6779  | 613.8884 | 652.1323 | 540.2186 | 526.8123 | 533.4919  | -0.13336  | 0.386156 | -0.12155 | 0.046156  | -0.01755  | 0.962126 |
| AT1G75335 | AT1G75335 | 15.45575 | 21.41095   | 14.1642  | 14.84696 | 17.22415 | 10.96525 | 11.56095  | 12.94668 | 20.50117 | 11.51443 | 11.97301 | 9.323159  | -0.1681   | 0.75066  | -0.13407 | 0.819722  | -0.52515  | NA       |
| AT1G75340 | CG1       | 162.8798 | 160.5821   | 173.8333 | 188.0615 | 194.7654 | 225.286  | 195.6468  | 208.2258 | 111.292  | 172.7164 | 156.9794 | 156.4219  | 0.275443  | 0.2583   | 0.047097 | 0.88248   | -0.03165  | 0.95904  |
| AT1G75350 | RLP31     | 2003.303 | 2365.91    | 2302.326 | 2267.873 | 2313.998 | 1986.704 | 1977.811  | 1990.552 | 4028.962 | 2745.231 | 2225.649 | 2815.594  | -0.02113  | 0.950326 | 0.251582 | 0.382446  | 0.214732  | 0.641169 |
| AT1G75360 | AT1G75360 | 21.40027 | 24.97944   | 18.02716 | 11.54764 | 7.949607 | 6.977885 | 10.67216  | 18.34113 | 23.4299  | 18.23118 | 19.95501 | 18.64632  | -1.05875  | 0.011476 | -0.25512 | 0.625902  | -0.14784  | 0.877782 |
| AT1G75370 | SFH5      | 947.5564 | 1090.174   | 950.3025 | 784.002  | 725.4017 | 898.1535 | 1074.2719 | 1036.813 | 697.0393 | 1101.547 | 1068.258 | 1140.533  | -0.31001  | 0.090224 | -0.0907  | 0.68893   | 0.14222   | 0.675877 |
| AT1G75380 | BD1       | 6838.575 | 9574.264   | 8158.578 | 7902.295 | 8056.927 | 7314.818 | 10845.95  | 10380    | 9600.403 | 8040.909 | 8588.636 | 8459.213  | -0.07666  | 0.64303  | 0.323894 | 0.021931  | 0.030191  | 0.92935  |
| AT1G75388 | CPuORF5   | 0        | 0          | 0        | 0        | 0        | 0        | 0         | 0        | 0        | 0        | 0        | 0         | #N/A      | #N/A     | #N/A     | #N/A      | #N/A      | #N/A     |
| AT1G75390 | AtbZIP44  | 0        | 0          | 0        | 0        | 0        | 0        | 0         | 0        | 0        | 0        | 0        | 0         | #N/A      | #N/A     | #N/A     | #N/A      | #N/A      | #N/A     |
| AT1G75394 | AT1G75394 | 0        | 0          | 0        | 0        | 0        | 0        | 0         | 0        | 0.976246 | 0.995936 | 0        | 1.035907  | 0         | 0.101336 | NA       | 0.3951396 | NA        | NA       |
| AT1G75400 | AT1G75400 | 150.9908 | 181.9931   | 169.9704 | 184.3498 | 164.2919 | 147.5324 | 170.7463  | 201.7524 | 159.1281 | 118.0229 | 118.3997 | 124.3088  | -0.00094  | 0.997514 | 0.0783   | 0.73103   | -0.46083  | 0.081703 |
| AT1G75410 | BH3       | 172.1535 | 270.8354</ |          |          |          |          |           |          |          |          |          |           |           |          |          |           |           |          |

|           |           |          |          |          |          |          |          |          |          |          |          |          |           |          |          |          |          |          |          |
|-----------|-----------|----------|----------|----------|----------|----------|----------|----------|----------|----------|----------|----------|-----------|----------|----------|----------|----------|----------|----------|
| AT1G75930 | EXL6      | 9.511232 | 5.352738 | 2.575309 | 0        | 0        | 0        | 0        | 0        | 0        | 26.867   | 6.65167  | 15.5386   | -2.13208 | 0.000467 | -1.8825  | 0.002695 | 1.247402 | NA       |
| AT1G75940 | BGLU20    | 36.85602 | 26.76369 | 12.87654 | 0        | 0        | 0.996841 | 0        | 0        | 0        | 76.76285 | 23.94601 | 95.3034   | -3.55303 | 1.66-11  | -3.37931 | 4.54E-10 | 1.232832 | 0.064776 |
| AT1G75950 | SKP1A     | 1161.559 | 1152.23  | 1286.367 | 1559.343 | 1740.964 | 1294.896 | 1354.409 | 1216.988 | 1825.58  | 110.5787 | 1315.7   | 1239.908  | 0.345331 | 0.061556 | 0.282198 | 0.153996 | 0.206272 | 0.965701 |
| AT1G75960 | AAE8      | 80.84547 | 114.1917 | 64.38272 | 58.97543 | 40.4105  | 63.79781 | 79.14801 | 69.04896 | 87.86214 | 57.57214 | 63.85603 | 59.04667  | -0.62454 | 0.019341 | -0.10789 | 0.759953 | -0.48231 | 0.253568 |
| AT1G75970 | AT1G75970 |          |          |          |          |          |          |          |          |          |          |          |           | #N/A     | #N/A     | #N/A     | #N/A     | #N/A     | #N/A     |
| AT1G75980 | AT1G75980 | 64.20081 | 98.13353 | 79.83457 | 137.7468 | 146.4053 | 92.70619 | 122.7239 | 110.0468 | 123.007  | 121.861  | 114.4087 | 111.8779  | 0.647348 | 0.005018 | 0.552734 | 0.024915 | 0.522001 | 0.13032  |
| AT1G75990 | RPN3B     | 266.3145 | 246.226  | 252.3803 | 350.5532 | 346.4704 | 335.9353 | 272.1269 | 317.1936 | 238.204  | 215.8955 | 260.7455 | 267.2639  | 0.425785 | 0.007039 | 0.107087 | 0.599705 | -0.0452  | 0.909264 |
| AT1G76000 | AT1G76000 |          |          |          |          |          |          |          |          |          |          |          |           | #N/A     | #N/A     | #N/A     | #N/A     | #N/A     | #N/A     |
| AT1G76010 | AT1G76010 | 1565.786 | 1336.4   | 1319.846 | 1068.156 | 1030.799 | 1055.654 | 990.6841 | 1192.173 | 1402.865 | 1204.217 | 1073.58  | 1174.718  | -0.41541 | 0.004876 | -0.23374 | 0.156054 | -0.28636 | 0.205441 |
| AT1G76020 | AT1G76020 | 145.0463 | 173.0719 | 229.2025 | 81.65828 | 82.14594 | 78.75042 | 98.71269 | 88.46897 | 98.60085 | 174.6355 | 167.6221 | 190.6068  | -1.14058 | 1.94E-09 | -0.90998 | 4.54E-06 | -0.03531 | 0.946238 |
| AT1G76030 | VHA-B1    | 2305.285 | 2174.996 | 2158.109 | 1467.375 | 1501.151 | 1777.367 | 1784.832 | 1934.45  | 1769.934 | 2017.903 | 1962.243 | 1920.571  | -0.48323 | 6.2E-06  | -0.2727  | 0.018996 | -0.16885 | 0.356429 |
| AT1G76040 | CPK29     | 112.9459 | 123.113  | 118.4642 | 358.8015 | 329.9087 | 362.85   | 377.954  | 325.8248 | 273.3489 | 92.11542 | 99.77505 | 96.33931  | 1.540267 | 9.42E-21 | 1.436927 | 1.06E-17 | -0.29016 | 0.379968 |
| AT1G76050 | AT1G76050 | 274.6368 | 248.0102 | 267.8321 | 221.0547 | 243.788  | 250.207  | 259.6766 | 256.7758 | 207.9404 | 289.7798 | 262.0758 | 277.6229  | -0.15224 | 0.377791 | -0.12785 | 0.501452 | 0.06701  | 0.850053 |
| AT1G76060 | EMB1793   | 43.98945 | 39.25341 | 51.50617 | 56.50093 | 59.62205 | 59.81045 | 48.02239 | 49.62894 | 84.9334  | 42.21957 | 61.19536 | 52.83123  | 0.350209 | 0.272205 | 0.403262 | 0.227934 | 0.17962  | 0.775068 |
| AT1G76062 | MIR835A   |          |          |          |          |          |          |          |          |          |          |          |           | #N/A     | #N/A     | #N/A     | #N/A     | #N/A     | #N/A     |
| AT1G76065 | AT1G76065 | 5.94452  | 8.92123  | 7.729526 | 16.08421 | 15.23675 | 9.968408 | 19.56468 | 9.710009 | 19.52492 | 9.595356 | 17.29434 | 14.50269  | 0.737476 | 0.141978 | 0.925421 | 0.071274 | 0.687726 | NA       |
| AT1G76070 | AT1G76070 | 40.42273 | 35.68492 | 25.75309 | 64.33683 | 66.90919 | 68.78201 | 81.81592 | 69.04896 | 93.71962 | 66.46235 | 33.25835 | 39.36445  | 0.917933 | 0.000552 | 1.203934 | 5.08E-06 | 0.092869 | 0.894073 |
| AT1G76080 | CDSP32    | 2159.05  | 2565.746 | 2349.969 | 1855.87  | 1761.5   | 1755.437 | 1934.235 | 2158.859 | 2613.411 | 2608.977 | 2324.093 | 2571.12   | -0.39084 | 0.004527 | -0.07538 | 0.672271 | 0.085363 | 0.76722  |
| AT1G76090 | SMT3      | 505.2842 | 471.041  | 459.6926 | 278.3805 | 298.7727 | 316.9954 | 241.8905 | 252.4602 | 418.8095 | 375.1784 | 439.0102 | 345.9928  | -0.66728 | 0.001035 | -0.63521 | 0.002451 | -0.30154 | 0.380705 |
| AT1G76100 | PETE      | 1584.809 | 1816.362 | 1753.785 | 1563.467 | 1505.126 | 1357.697 | 1044.932 | 1068.101 | 1593.233 | 1587.072 | 1423.457 | 1718.5569 | -0.21418 | 0.26763  | -0.46591 | 0.009262 | -0.12087 | 0.734759 |
| AT1G76110 | HMG89     | 499.3397 | 572.743  | 516.3494 | 353.0277 | 359.0573 | 355.8722 | 331.7102 | 342.0081 | 283.1113 | 586.2763 | 522.8213 | 592.5385  | -0.56276 | 8.01E-06 | -0.71924 | 1.79E-08 | 0.104638 | 0.684244 |
| AT1G76120 | AT1G76120 | 120.0793 | 107.0548 | 133.9161 | 115.4764 | 113.2819 | 134.5733 | 173.4142 | 169.3857 | 95.67211 | 133.3755 | 151.6581 | 136.7397  | -0.00341 | 0.991886 | 0.26466  | 0.339607 | 0.206681 | 0.646288 |
| AT1G76130 | AMY2      | 131.9683 | 105.2705 | 121.0395 | 68.04857 | 66.24673 | 57.81677 | 42.68657 | 60.41784 | 40.02609 | 82.52006 | 61.19536 | 103.5907  | -0.86215 | 0.000245 | -1.28106 | 1.44E-07 | -0.51076 | 0.16063  |
| AT1G76135 | MIR834B   |          |          |          |          |          |          |          |          |          |          |          |           | 0.194359 | 0.785687 | 0.52742  | 0.42538  | -0.0699  | NA       |
| AT1G76140 | AT1G76140 | 557.596  | 595.9382 | 569.1432 | 611.1999 | 505.4625 | 685.8265 | 760.3545 | 792.9841 | 525.2203 | 523.9065 | 432.3585 | 499.3069  | 0.063057 | 0.790647 | 0.265648 | 0.204345 | -0.23493 | 0.471105 |
| AT1G76150 | ECH2      | 267.5034 | 360.4177 | 356.6803 | 539.0272 | 581.6463 | 543.2782 | 561.1505 | 505.9994 | 556.4602 | 333.9184 | 309.9678 | 320.0951  | 0.753767 | 3.72E-08 | 0.719391 | 2.56E-07 | -0.02193 | 0.957023 |
| AT1G76160 | sk5       | 875.0333 | 920.671  | 860.1531 | 748.1219 | 672.4043 | 925.0684 | 578.0473 | 669.9907 | 735.0089 | 739.802  | 646.5423 | 737.5654  | -0.17917 | 0.27582  | -0.53491 | 0.000323 | -0.31544 | 0.15612  |
| AT1G76170 | AT1G76170 | 58.25629 | 69.5856  | 56.65679 | 94.85558 | 99.37009 | 92.70619 | 87.15174 | 81.99564 | 102.5058 | 58.53167 | 67.84703 | 67.33392  | 0.631195 | 0.004235 | 0.552828 | 0.019773 | 0.07407  | 0.894848 |
| AT1G76180 | ERD14     | 3828.271 | 4176.92  | 4214.493 | 3648.228 | 3747.577 | 3685.32  | 3568.775 | 3725.407 | 7141.239 | 3432.259 | 3007.885 | 4095.974  | -0.13599 | 0.040725 | 0.231904 | 0.404983 | -0.20594 | 0.64177  |
| AT1G76185 | AT1G76185 | 58.25629 | 73.15409 | 75.97161 | 77.94654 | 86.12075 | 82.73778 | 77.3694  | 69.04896 | 95.67211 | 59.49211 | 61.19536 | 67.33392  | -0.27141 | 0.33475  | -0.25291 | 0.424784 | -0.12797 | 0.806773 |
| AT1G76190 | AT1G76190 | 8.322328 | 8.92123  | 2.575309 | 7.42348  | 7.949607 | 3.987363 | 7.114428 | 9.710009 | 6.833722 | 11.51443 | 9.312338 | 5.179533  | 0.018629 | 0.979871 | 0.204448 | 0.780217 | 0.318353 | NA       |
| AT1G76200 | AT1G76200 | 342.4043 | 287.2636 | 329.6395 | 557.9983 | 606.82   | 352.8816 | 307.699  | 254.618  | 805.4209 | 155.0282 | 344.5565 | 477.5529  | 0.57721  | 0.204876 | 0.444953 | 0.369273 | 0.256066 | 0.769636 |
| AT1G76210 | AT1G76210 |          |          |          |          |          |          |          |          |          |          |          |           | 0.06603  | NA       | 0.157107 | NA       | 0.160871 | NA       |
| AT1G76220 | AT1G76220 | 1.188904 | 1.784246 | 2.575309 | 2.886909 | 5.299738 | 3.987363 | 0        | 2.15778  | 1.952492 | 0.919071 | 0        | 0.2071813 | 0.675219 | 0.33444  | -0.21493 | 0.801996 | -0.17173 | NA       |
| AT1G76230 | AT1G76230 |          |          |          |          |          |          |          |          |          |          |          |           | -0.32105 | 0.625956 | -0.04459 | 0.958381 | -0.42062 | NA       |
| AT1G76240 | AT1G76240 | 272.259  | 233.7362 | 225.3395 | 167.0283 | 208.0147 | 176.4408 | 58.69403 | 55.02339 | 73.21845 | 231.2481 | 264.7365 | 228.9353  | -0.4035  | 0.023693 | -1.9139  | 9.95E-26 | -0.01836 | 0.970574 |
| AT1G76250 | AT1G76250 | 4.755616 | 1.784246 | 6.438272 | 2.886909 | 4.637271 | 0.996841 | 6.225424 | 2.15778  | 4.88123  | 2.87607  | 7.982004 | 4.143626  | -0.39844 | 0.58176  | 0.004355 | 0.99603  | 0.077245 | NA       |
| AT1G76260 | DWA2      | 79.65656 | 53.52738 | 75.97161 | 83.72036 | 80.15854 | 76.75674 | 51.5796  | 70.12785 | 43.93107 | 63.32935 | 91.79304 | 90.12387  | 0.181378 | 0.544601 | -0.34495 | 0.256822 | 0.194944 | 0.706832 |
| AT1G76270 | AT1G76270 | 97.49012 | 123.113  | 121.0395 | 129.4985 | 86.12075 | 101.6778 | 108.495  | 138.0979 | 96.64835 | 110.3366 | 147.6671 | 122.237   | -0.08664 | 0.773161 | -0.00292 | 0.978201 | 0.14847  | 0.764564 |
| AT1G76280 | AT1G76280 | 193.7913 | 178.4246 | 177.6963 | 120.4253 | 114.6068 | 143.5451 | 177.8607 | 167.2279 | 113.2445 | 184.2308 | 232.8084 | 193.7145  | -0.53435 | 0.009617 | -0.25658 | 0.282246 | 0.141273 | 0.735019 |
| AT1G76290 | AE21      |          |          |          |          |          |          |          |          |          |          |          |           | 0        | NA       | 0.160764 | NA       | 0        | NA       |
| AT1G76300 | SMD3A     | 103.4346 | 144.5239 | 106.8753 | 222.292  | 164.9544 | 203.3555 | 129.8383 | 143.4924 | 217.7029 | 144.8899 | 133.0334 | 98.41112  | 0.717638 | 0.00391  | 0.458565 | 0.09615  | 0.090619 | 0.879579 |
| AT1G76310 | CYC84     | 103.4346 | 96.34929 | 91.42346 | 121.2502 | 125.8688 | 124.6051 | 91.59826 | 99.25787 | 99.57709 | 141.0517 | 121.0604 | 114.9856  | 0.340133 | 0.087393 | -0.00824 | 0.977155 | 0.36532  | 0.225684 |
| AT1G76320 | FRS2      | 215.1916 | 219.4623 | 209.8877 | 194.2477 | 190.7906 | 210.3334 | 221.4366 | 207.1469 | 151.3181 | 235.0862 | 228.8174 | 189.5709  | -0.11431 | 0.597143 | -0.14735 | 0.513704 | 0.019696 | 0.969668 |
| AT1G76330 | AT1G76330 |          |          |          |          |          |          |          |          |          |          |          |           | 0.097058 | NA       | 0.130384 | NA       | 0.130384 | NA       |
| AT1G76340 | GONST3    | 208.0582 | 228.3835 | 207.3123 | 202.496  | 164.2919 | 202.3587 | 187.643  | 207.1469 | 186.463  | 148.728  | 187.5771 | 193.7145  | -0.17404 | 0.382819 | -0.14173 | 0.509988 | -0.27515 | 0.339925 |
| AT1G76350 | NLP5      | 211.6249 | 239.089  | 224.0519 | 160.4297 | 162.9669 | 185.4124 | 189.4216 | 220.0935 | 155.2231 | 202.462  | 187.5771 | 212.3608  | -0.40273 | 0.021837 | -0.24986 | 0.207749 | -0.15365 | 0.646732 |
| AT1G76360 | AT1G76360 | 159.3131 | 246.226  | 181.5593 | 249.099  | 229.8761 | 258.1818 | 192.9789 | 231.9613 | 189.3917 | 157.3638 | 114.4087 | 154.3501  | 0.333547 | 0.108512 | 0.075659 | 0.781051 | -0.42756 | 0.162165 |
| AT1G76370 | AT1G76370 |          |          |          |          |          |          |          |          |          |          |          |           | 0.361969 | NA       | 0.361969 | NA       | 0.404406 | NA       |
| AT1G76380 | AT1G76380 | 110.5681 | 105.2705 | 77.25926 | 99.39215 | 110.632  | 125.6019 | 94.26617 | 105.7312 | 97.6246  | 95.95356 | 97.11438 | 89.08796  | 0.180425 | 0.452895 | 0.022592 | 0.941577 | -0.05137 | 0.924762 |
| AT1G76390 | PUB43     | 165.2576 | 180.2088 | 150.6556 | 197.9595 | 218.6142 | 227.2797 | 258.7875 | 281.5903 | 173.7718 | 153.5257 | 113.0784 | 168.8528  | 0.365006 | 0.111746 | 0.512551 | 0.024915 | -0.17116 | 0.698887 |
| AT1G76400 | OST1A     | 436.3277 | 360.4177 | 361.8309 | 314.2607 | 359.0573 | 337.929  | 398.408  | 419.6882 | 274.2531 | 331.9993 | 353.8668 | 402.9676  | -0.19594 | 0.343905 | -0.08602 | 0.726233 | -0.09016 | 0.828866 |
| AT1G76405 | OE21B     | 83.22328 | 85.64381 | 123.6148 | 168.678  | 167.6042 | 156.504  | 105.8271 | 107.889  | 152.2944 | 121.7936 | 127.7121 | 128.4524  | 0.72701  |          |          |          |          |          |





|           |           |          |          |          |          |          |          |          |          |          |          |          |          |          |          |            |           |          |          |
|-----------|-----------|----------|----------|----------|----------|----------|----------|----------|----------|----------|----------|----------|----------|----------|----------|------------|-----------|----------|----------|
| AT1G77780 | AT1G77780 | 0        | 0        | 0        | 0        | 0        | 0        | 0.889303 | 2.15778  | 0.476246 | 0        | 1.330334 | 0        | 0        | NA       | 0.141773   | NA        | 0.183636 | NA       |
| AT1G77790 | AT1G77790 | 0        | 3.568492 | 1.287654 | 0.412246 | 0.662467 | 0        | 0.889303 | 2.15778  | 0.476246 | 0        | 0        | 0        | -0.54686 | 0.392312 | -0.01782   | 0.081997  | -0.74108 | NA       |
| AT1G77800 | AT1G77800 | 970.1456 | 781.4998 | 793.1951 | 422.726  | 390.1932 | 589.1329 | 576.2687 | 702.3574 | 498.0969 | 764.7499 | 711.7287 | 725.1346 | -0.84304 | 1.37E-05 | -0.54665   | 0.008161  | -0.20435 | 0.582115 |
| AT1G77810 | B3GALT7   | 96.30122 | 89.2123  | 123.6148 | 270.957  | 276.9113 | 214.3208 | 321.9279 | 295.6158 | 277.2539 | 84.43914 | 102.4357 | 74.58527 | 1.266688 | 9.12E-12 | 1.486717   | 1.03E-15  | -0.25267 | 0.514832 |
| AT1G77815 | AT1G77815 | 0        | 0        | 0        | 0        | 0        | 0        | 0        | 0        | 0        | 0        | 0        | 0        | #N/A     | #N/A     | #N/A       | #N/A      | #N/A     | #N/A     |
| AT1G77820 | AT1G77820 | 0        | 0        | 0        | 0.412416 | 0        | 0        | 0        | 0        | 0        | 0        | 0        | 0        | 0.095918 | NA       | 0          | NA        | 0        | NA       |
| AT1G77830 | AT1G77830 | 0        | 0        | 0        | 0        | 0        | 0        | 0        | 0        | 1.07889  | 0        | 0        | 0        | 0        | 0        | 0.16673    | NA        | 0        | NA       |
| AT1G77840 | AT1G77840 | 512.4176 | 499.5889 | 516.3494 | 513.8698 | 543.2232 | 558.2308 | 530.0249 | 546.9972 | 616.0112 | 443.3055 | 440.3405 | 487.912  | 0.075415 | 0.607454 | 0.145029   | 0.311833  | -0.15467 | 0.482582 |
| AT1G77850 | ARF17     | 101.0568 | 128.4657 | 118.4642 | 137.3344 | 133.8184 | 124.6051 | 101.3806 | 94.94231 | 124.9595 | 107.468  | 121.0604 | 108.7702 | 0.197482 | 0.362622 | -0.10092   | 0.699165  | -0.03823 | 0.941664 |
| AT1G77855 | AT1G77855 | 15.45575 | 14.27397 | 14.1642  | 7.011065 | 8.612075 | 9.968408 | 8.003731 | 7.55223  | 13.66744 | 22.06932 | 23.94601 | 11.39497 | -0.69523 | 0.149853 | -0.49315   | 0.366453  | 0.332521 | NA       |
| AT1G77860 | KOM       | 1.188904 | 8.92123  | 0        | 2.474493 | 1.324935 | 1.993682 | 0.889303 | 2.15778  | 0.976246 | 8.381143 | 2.660668 | 5.179533 | -0.32192 | 0.67732  | -0.54972   | 0.470804  | 0.24525  | NA       |
| AT1G77870 | MUB5      | 34.47821 | 19.62671 | 32.19136 | 9.485558 | 17.22415 | 8.971567 | 5.335821 | 0        | 2.928738 | 33.58375 | 26.60668 | 52.83123 | -1.12729 | 0.008226 | -2.52032   | 6.13E-08  | 0.351699 | 0.654861 |
| AT1G77880 | AT1G77880 | 3.566712 | 1.784246 | 1.287654 | 4.124156 | 5.962205 | 0        | 2.66791  | 0        | 3.904984 | 5.757214 | 6.65167  | 2.071813 | 0.328283 | 0.669684 | -0.0292    | 0.973945  | 0.574481 | NA       |
| AT1G77885 | AT1G77885 | 19.02246 | 14.27397 | 12.87654 | 20.20836 | 19.87402 | 10.96525 | 16.00746 | 8.63112  | 45.88356 | 33.02886 | 33.25835 | 19.68222 | 0.121851 | 0.845832 | 0.495501   | 0.385163  | 0.572278 | 0.50172  |
| AT1G77890 | AT1G77890 | 72.52314 | 78.50683 | 87.5605  | 160.8421 | 151.0425 | 208.3397 | 219.658  | 169.3857 | 120.0783 | 88.27728 | 133.0334 | 85.98024 | 1.06437  | 3.45E-05 | 1.041554   | 7.28E-05  | 0.333746 | 0.490609 |
| AT1G77910 | AT1G77910 | 0        | 0        | 0        | 0        | 0        | 0        | 0        | 0        | 0        | 0        | 0        | 0        | #N/A     | #N/A     | #N/A       | #N/A      | #N/A     | #N/A     |
| AT1G77920 | TGA7      | 108.1903 | 71.36984 | 99.14938 | 233.8396 | 193.4404 | 213.3239 | 230.3296 | 185.5691 | 120.8691 | 94.99403 | 95.78405 | 93.23159 | 1.152807 | 3.77E-10 | 1.120058   | 2.48E-09  | 0.002843 | 0.996198 |
| AT1G77930 | AT1G77930 | 1024.835 | 1263.246 | 1211.683 | 1236.422 | 1157.993 | 1092.537 | 1266.368 | 1160.886 | 1343.314 | 1551.569 | 1843.843 | 1420.228 | -0.00228 | 0.990993 | 0.108091   | 0.543503  | 0.45501  | 0.011411 |
| AT1G77932 | AT1G77932 | 0        | 0        | 0        | 0.412416 | 0        | 1.993682 | 0        | 0        | 0.976246 | 0.99536  | 0        | 0        | 0.374321 | NA       | 0.15275    | NA        | 0.161539 | NA       |
| AT1G77940 | RPL30B    | 1009.379 | 845.7326 | 1015.959 | 1132.081 | 1297.111 | 920.084  | 767.4689 | 728.2507 | 1367.721 | 1107.304 | 1416.806 | 1217.19  | 0.214076 | 0.42747  | -0.00457   | 0.988996  | 0.366687 | 0.332495 |
| AT1G77950 | AGL67     | 0        | 0        | 0        | 0        | 0        | 0        | 0        | 0        | 0        | 0        | 0        | 0        | #N/A     | #N/A     | #N/A       | #N/A      | #N/A     | #N/A     |
| AT1G77960 | AT1G77960 | 46.36725 | 55.31163 | 51.50617 | 13.60971 | 13.24935 | 10.96525 | 5.335821 | 6.47334  | 1.952492 | 50.85539 | 35.91902 | 37.29264 | -1.83846 | 7.85E-09 | -2.95417   | 1.54E-14  | -0.26582 | 0.663474 |
| AT1G77980 | AGL66     | 0        | 0        | 0        | 0        | 0        | 0        | 0        | 0        | 0        | 0        | 1.330334 | 0        | 0        | NA       | 0          | NA        | 0.172362 | NA       |
| AT1G77990 | SULTR2    | 149.8019 | 148.0924 | 137.779  | 68.04857 | 60.28452 | 67.78517 | 60.47264 | 44.23449 | 43.93107 | 104.5894 | 99.77505 | 116.0215 | -1.11967 | 3.94E-09 | -1.49334   | 2.37E-13  | -0.42826 | 0.152111 |
| AT1G77992 | AT1G77992 | 0        | 0        | 0        | 0        | 0        | 0        | 0        | 0        | 0        | 0        | 0        | 0        | #N/A     | #N/A     | #N/A       | #N/A      | #N/A     | #N/A     |
| AT1G78000 | SULTR1    | 42.80054 | 46.3904  | 41.20494 | 48.66504 | 47.03518 | 49.84204 | 32.01493 | 43.1556  | 30.26363 | 47.97678 | 65.18636 | 46.61579 | 0.155869 | 0.638255 | -0.29154   | 0.399579  | 0.271016 | 0.604324 |
| AT1G78010 | AT1G78010 | 235.403  | 223.0308 | 229.2025 | 200.0216 | 240.4756 | 209.3366 | 235.6654 | 254.618  | 288.9688 | 260.9937 | 236.7994 | 250.6894 | -0.08452 | 0.661396 | -0.17473   | 0.348895  | 0.120722 | 0.70347  |
| AT1G78020 | AT1G78020 | 469.6171 | 499.5889 | 515.0617 | 329.9325 | 279.5612 | 238.2449 | 322.8172 | 401.3471 | 512.5291 | 513.3516 | 419.0552 | 566.4049 | -0.77998 | 5.84E-05 | -0.2567    | 0.264191  | 0.016471 | 0.976985 |
| AT1G78030 | AT1G78030 | 4.755616 | 7.136984 | 5.150617 | 9.073143 | 10.59948 | 9.581045 | 10.61764 | 5.39445  | 27.33449 | 2.878607 | 9.312338 | 7.625146 | 0.43908  | 0.498476 | 1.024873   | 0.08721   | 0.10656  | NA       |
| AT1G78040 | AT1G78040 | 4044.651 | 4118.04  | 4526.105 | 3993.008 | 4617.397 | 3531.807 | 3363.346 | 2955.08  | 4911.494 | 4807.273 | 5701.811 | 4575.599 | -0.06182 | 0.805011 | -0.17189   | 0.463622  | 0.243262 | 0.469967 |
| AT1G78050 | PGM       | 28.53369 | 24.97944 | 28.3284  | 30.93117 | 32.4609  | 27.91154 | 42.68657 | 29.13003 | 22.45366 | 37.42189 | 25.27635 | 45.57989 | 0.141027 | 0.732443 | 0.185242   | 0.681127  | 0.377383 | 0.549468 |
| AT1G78060 | BXL7      | 442.2723 | 301.5376 | 325.7765 | 98.56732 | 133.8184 | 131.583  | 125.3918 | 126.2301 | 98.60085 | 302.2537 | 311.2981 | 286.9461 | -1.57206 | 1.46E-16 | -1.57206   | 1.46E-16  | -0.24821 | 0.699944 |
| AT1G78070 | AT1G78070 | 494.584  | 654.8183 | 620.6494 | 332.407  | 294.7979 | 353.8785 | 289.0236 | 277.2747 | 257.7289 | 452.9008 | 395.1092 | 444.3099 | -0.83678 | 5.03E-09 | -1.08117   | 8.11E-14  | -0.44052 | 0.026729 |
| AT1G78080 | RA2P-4    | 1096.169 | 688.4723 | 992.7815 | 1163.012 | 1314.998 | 1247.048 | 1414.882 | 1352.928 | 1685.977 | 743.6401 | 738.3354 | 835.9766 | 0.270719 | 0.043836 | 0.526645   | 0.339E-05 | -0.40472 | 0.016719 |
| AT1G78090 | TPPB      | 10.70014 | 17.84246 | 16.73951 | 3.299325 | 5.299738 | 1.993682 | 3.557214 | 4.31556  | 0        | 20.15025 | 14.63367 | 24.86176 | -1.60765 | 0.001299 | -1.82422   | 0.000595  | 0.396973 | NA       |
| AT1G78095 | AT1G78095 | 0        | 0        | 0        | 0        | 0        | 0        | 0        | 0        | 0        | 0        | 0        | 0        | #N/A     | #N/A     | #N/A       | #N/A      | #N/A     | #N/A     |
| AT1G78100 | AT1G78100 | 244.9142 | 239.089  | 226.6272 | 222.292  | 202.0525 | 232.2639 | 161.8532 | 219.0147 | 263.5864 | 221.6527 | 222.1658 | 195.7863 | -0.11288 | 0.620436 | -0.14005   | 0.55504   | -0.14906 | 0.694425 |
| AT1G78110 | AT1G78110 | 242.5364 | 140.9554 | 187.9975 | 99.80457 | 103.3449 | 79.74276 | 89.81965 | 80.91675 | 161.0806 | 127.6182 | 162.3007 | 170.9246 | -0.96428 | 0.000344 | -0.75103   | 0.008303  | -0.30442 | 0.540551 |
| AT1G78120 | TPR12     | 36.85602 | 23.1952  | 23.17778 | 13.60971 | 16.56168 | 21.9305  | 20.45398 | 19.42002 | 21.47761 | 30.70514 | 23.94601 | 30.04129 | -0.67952 | 0.0673   | -0.41677   | 0.327041  | 0.016647 | 0.987638 |
| AT1G78130 | UNE2      | 145.0463 | 149.8767 | 135.2037 | 179.8132 | 194.1029 | 178.4345 | 211.6542 | 203.9102 | 129.8407 | 137.2136 | 175.6041 | 130.5242 | 0.352655 | 0.118912 | 0.334375   | 0.166217  | 0.037292 | 0.949258 |
| AT1G78140 | AT1G78140 | 412.5497 | 438.9245 | 480.2951 | 357.5643 | 367.6693 | 425.651  | 578.9366 | 552.3916 | 415.4579 | 468.2534 | 541.4459 | 505.5224 | -0.21451 | 0.144249 | 0.30327    | 0.036733  | 0.18175  | 0.46208  |
| AT1G78150 | AT1G78150 | 609.9077 | 642.3286 | 611.6358 | 760.4943 | 778.399  | 778.5326 | 634.9627 | 686.174  | 670.681  | 621.7791 | 617.275  | 564.5691 | 0.313243 | 0.00316  | 0.096114   | 0.468301  | -0.04574 | 0.85654  |
| AT1G78160 | APUM7     | 0        | 3.568492 | 0        | 0.824831 | 0        | 0        | 0        | 0        | 0        | 0.995936 | 5.321336 | 2.071813 | -0.37892 | 0.564437 | -0.53308   | 0.40353   | 0.580222 | NA       |
| AT1G78170 | AT1G78170 | 124.8349 | 180.2088 | 202.1617 | 117.5384 | 137.1307 | 118.6241 | 144.9565 | 120.8357 | 143.5082 | 234.1267 | 376.4845 | 260.0125 | -0.42228 | 0.085823 | -0.29172   | 0.285533  | 0.753118 | 0.008853 |
| AT1G78172 | AT1G78172 | 4.755616 | 3.568492 | 5.150617 | 9.073143 | 13.91181 | 10.96525 | 11.56095 | 2.15778  | 12.6912  | 10.55489 | 11.97301 | 6.215439 | 0.94441  | 0.09379  | 0.669824   | 0.290318  | 0.737108 | NA       |
| AT1G78180 | AT1G78180 | 148.613  | 123.113  | 119.7155 | 96.50524 | 107.9822 | 82.73778 | 95.15647 | 86.3112  | 94.65986 | 120.9051 | 93.12338 | 121.2011 | -0.43121 | 0.037665 | -0.4929    | 0.240305  | -0.21421 | 0.571787 |
| AT1G78190 | AT1G78190 | 22.58917 | 23.1952  | 23.17778 | 53.61402 | 74.19633 | 52.83256 | 36.46144 | 32.3667  | 49.78855 | 16.31211 | 19.95501 | 8.287252 | 1.297062 | 6.75E-05 | 0.718627   | 0.053834  | -0.57346 | 0.365146 |
| AT1G78200 | AT1G78200 | 242.5364 | 315.8115 | 327.0642 | 502.7346 | 540.5733 | 451.5689 | 514.9067 | 483.3427 | 485.1942 | 284.0225 | 324.6015 | 347.0287 | 0.750915 | 5.85E-07 | 0.737778   | 1.38E-06  | 0.111483 | 0.737388 |
| AT1G78206 | MIR775A   | 3.566712 | 0        | 0        | 3.299325 | 0        | 3.299325 | 1.993682 | 0        | 2.15778  | 0.976246 | 1.919071 | 3.991002 | 0.350289 | 0.644039 | -0.15162   | 0.860039  | 0.426466 | NA       |
| AT1G78210 | AT1G78210 | 248.4809 | 244.4417 | 279.421  | 419.8391 | 506.125  | 386.7742 | 264.1231 | 236.2769 | 265.5389 | 320.4849 | 284.6915 | 256.9048 | 0.752656 | 1.5E-06  | -0.10307   | 0.9573    | 0.1545   | 0.626543 |
| AT1G78220 | GF14 PI   | 0        | 0        | 0        | 0        | 0        | 0        | 0.889303 | 0        | 0        | 0        | 1.330334 | 0        | 0        | NA       | 0.141773   | NA        | 0.183636 | NA       |
| AT1G78230 | AT1G78230 | 444.6501 | 358.6335 | 347.6667 | 139.8089 | 143.7554 | 109.6525 | 90.70896 | 81.99564 | 50.76479 | 353.1091 | 336.5745 | 328.3824 | -1.50278 | 2.55E-16 | -2.29292   | 2.78E-32  | -0.17452 | 0.63581  |
| AT1G78240 | QUA2      | 589.6664 | 681.582  | 587.1704 | 538.6147 | 471.0142 | 625.0192 | 597.6119 | 618.2039 | 397.3321 | 605.467  | 607.9626 | 551.1023 | -0.18916 | 0.193271 | -0.19783</ |           |          |          |

|           |           |          |          |          |          |          |          |          |          |          |           |          |           |          |          |           |          |          |          |
|-----------|-----------|----------|----------|----------|----------|----------|----------|----------|----------|----------|-----------|----------|-----------|----------|----------|-----------|----------|----------|----------|
| AT1G78730 | AT1G78730 | 73.71204 | 62.44861 | 75.97161 | 57.32576 | 45.04777 | 50.83888 | 58.69403 | 60.41784 | 55.64602 | 64.28889  | 97.11438 | 68.36983  | -0.45041 | 0.082679 | -0.27741  | 0.352296 | 0.087309 | 0.87994  |
| AT1G78740 | AT1G78740 | 1.188904 | 0        | 0        | 0        | 0        | 0        | 0        | 0        | 0        | 0         | 0        | 0         | -0.2184  | NA       | -0.20558  | NA       | -0.19118 | NA       |
| AT1G78750 | AT1G78750 | 23.77808 | 16.05821 | 28.3284  | 5.773818 | 6.624673 | 7.974726 | 13.33955 | 9.710009 | 6.833722 | 31.66468  | 34.58868 | 27.96948  | -1.5715  | 9.57E-05 | -1.05093  | 0.01534  | 0.412143 | 0.552667 |
| AT1G78760 | AT1G78760 | 3.566712 | 1.784246 | 1.287654 | 0        | 1.324935 | 0.996841 | 0        | 1.07889  | 0.976246 | 0         | 2.660668 | 1.035907  | -0.62649 | 0.355437 | -0.61705  | 0.378565 | -0.38422 | NA       |
| AT1G78770 | APC6      | 68.88540 | 39.25341 | 51.50617 | 54.43886 | 46.37271 | 49.84204 | 29.34701 | 36.68226 | 21.47741 | 55.65307  | 55.87403 | 52.83123  | -0.09568 | 0.78681  | -0.84351  | 0.005578 | 0.01596  | 0.984931 |
| AT1G78780 | AT1G78780 | 1.188904 | 0        | 0        | 0        | 15.8587  | 18.54908 | 19.93682 | 20.23632 | 31.28781 | 22.45366  | 3.88143  | 1.330334  | 2.810909 | 4.8E-08  | -3.31591  | 7.85E-11 | 0.462807 | NA       |
| AT1G78790 | AT1G78790 | 78.46766 | 78.50683 | 108.163  | 97.74249 | 117.2567 | 84.73147 | 101.1629 | 78.75897 | 92.74337 | 83.4796   | 85.14137 | 80.97896  | 0.172288 | 0.523757 | 0.088464  | 0.781827 | -0.04528 | 0.941763 |
| AT1G78800 | AT1G78800 | 178.3356 | 151.6609 | 186.7099 | 255.2852 | 247.7628 | 242.2323 | 209.8762 | 231.9613 | 241.1328 | 172.7164  | 239.4601 | 148.1346  | 0.510883 | 0.007349 | 0.38481   | 0.063366 | 0.096749 | 0.823473 |
| AT1G78810 | AT1G78810 | 83.23238 | 64.23286 | 61.80741 | 74.2348  | 51.67245 | 79.74726 | 61.36194 | 62.57562 | 65.40848 | 78.68192  | 79.82004 | 83.90843  | -0.03872 | 0.906538 | -0.14806  | 0.647221 | 0.19511  | 0.689428 |
| AT1G78815 | LSH7      | 2.377808 | 0        | 0        | 2.886909 | 0        | 1.993682 | 1.778607 | 0        | 1.952492 | 0         | 1.330334 | 4.143626  | 0.271557 | 0.7116   | -0.130948 | 0.871908 | 0.310471 | NA       |
| AT1G78820 | AT1G78820 | 526.6844 | 433.5718 | 422.3506 | 157.9552 | 129.8436 | 170.4598 | 169.857  | 206.068  | 161.0806 | 424.1147  | 458.9652 | 379.1418  | -1.56875 | 7.32E-23 | -1.34236  | 1.73E-16 | -0.13302 | 0.689378 |
| AT1G78830 | AT1G78830 | 1382.695 | 1609.39  | 1149.875 | 1221.163 | 1210.99  | 1412.523 | 1642.544 | 1765.064 | 1885.131 | 805.0504  | 838.1104 | 971.6803  | -0.10505 | 0.564096 | 0.350435  | 0.028934 | -0.65102 | 0.000225 |
| AT1G78840 | AT1G78840 | 1.188904 | 0        | 0        | 0        | 0.662467 | 0        | 1.778607 | 0        | 0        | 0         | 1.330334 | 0         | -0.11633 | NA       | 0.088006  | NA       | -0.10403 | NA       |
| AT1G78850 | AT1G78850 | 614.6633 | 717.2669 | 629.663  | 382.3092 | 378.9313 | 567.2024 | 696.3246 | 829.6664 | 904.0038 | 494.1608  | 528.1426 | 566.6409  | -0.55485 | 0.002438 | 0.303934  | 0.133988 | -0.29544 | 0.321328 |
| AT1G78860 | AT1G78860 | 19.02246 | 26.76369 | 28.3284  | 17.32145 | 15.23675 | 21.9305  | 15.23675 | 23.73558 | 25.3824  | 18.23118  | 27.93701 | 22.78994  | -0.41494 | 0.299766 | -0.09027  | 0.299766 | -0.09    | 0.913891 |
| AT1G78865 | AT1G78865 | 66.57862 | 60.66437 | 75.97161 | 82.48311 | 104.6698 | 120.6177 | 84.48383 | 70.12785 | 71.26596 | 103.6298  | 98.44471 | 81.83662  | 0.550711 | 0.022101 | 0.140385  | 0.657494 | 0.454745 | 0.252336 |
| AT1G78870 | UBC35     | 525.4955 | 636.9758 | 692.758  | 855.3499 | 953.2904 | 883.2009 | 822.6057 | 827.5086 | 1028.963 | 662.0796  | 791.5487 | 568.7127  | 0.528012 | 0.001642 | 0.521435  | 0.002369 | 0.121023 | 0.726049 |
| AT1G78880 | AT1G78880 | 0        | 0        | 0        | 0        | 0        | 0        | 0        | 0        | 0        | 0         | 0        | 0         | #N/A     | #N/A     | #N/A      | #N/A     | #N/A     | #N/A     |
| AT1G78882 | CPuORF56  | 0        | 0        | 0        | 0        | 0        | 0        | 0        | 0        | 0        | 0         | 0        | 0         | #N/A     | #N/A     | #N/A      | #N/A     | #N/A     | #N/A     |
| AT1G78890 | AT1G78890 | 196.1692 | 183.7773 | 202.1617 | 251.5735 | 293.473  | 229.2734 | 232.1082 | 230.8824 | 354.3773 | 198.6239  | 284.6915 | 212.3608  | 0.398439 | 0.080351 | 0.472188  | 0.041901 | 0.240856 | 0.547457 |
| AT1G78895 | RTLNC2    | 61.82301 | 83.85956 | 77.25926 | 115.8888 | 121.894  | 92.70619 | 112.9415 | 105.7312 | 162.0568 | 61.41028  | 81.15037 | 79.7648   | 0.564186 | 0.024476 | 0.752978  | 0.002638 | -0.00057 | 0.98989  |
| AT1G78900 | VHA-A     | 4408.456 | 3961.026 | 3815.32  | 2651.832 | 2545.199 | 3047.342 | 2892.015 | 3244.222 | 2741.299 | 3768.096  | 3784.8   | 3438.174  | -0.55925 | 2.2E-06  | -0.45285  | 0.000201 | -0.14767 | 0.499192 |
| AT1G78910 | AT1G78910 | 45.17835 | 28.54794 | 34.76667 | 40.41673 | 42.39791 | 39.87363 | 43.57587 | 50.70783 | 32.21612 | 32.62421  | 22.61568 | 32.1131   | 0.147099 | 0.692911 | 0.183353  | 0.642409 | -0.29643 | 0.624674 |
| AT1G78915 | AT1G78915 | 323.3819 | 444.2773 | 437.8025 | 233.8396 | 126.6268 | 225.2826 | 308.5883 | 309.6414 | 264.5627 | 461.5366  | 432.3585 | 430.9371  | -0.81434 | 6.12E-08 | -0.43648  | 0.007488 | 0.140833 | 0.636115 |
| AT1G78920 | AVPL1     | 773.9765 | 686.9347 | 687.6074 | 936.1834 | 652.5303 | 1096.525 | 745.2363 | 961.2909 | 646.2748 | 513.3516  | 453.6439 | 534.5722  | 0.310961 | 0.16046  | 0.126064  | 0.004404 | -0.50168 | 0.08698  |
| AT1G78922 | AT1G78922 | 0        | 0        | 0        | 0        | 0.662467 | 0.996841 | 0.889303 | 0        | 0        | 0         | 0        | 0         | 0.275488 | NA       | 0.154887  | NA       | 0        | NA       |
| AT1G78930 | AT1G78930 | 49.93397 | 42.8219  | 43.78025 | 54.43886 | 52.33491 | 41.86731 | 79.14801 | 51.78672 | 36.1211  | 42.21957  | 45.23135 | 52.83123  | 0.121561 | 0.754032 | 0.273711  | 0.465528 | 0.030465 | 0.972422 |
| AT1G78940 | AT1G78940 | 40.42273 | 42.8219  | 33.47901 | 23.09527 | 21.9895  | 20.93366 | 38.24005 | 38.84004 | 27.34889 | 51.81492  | 55.87403 | 74.58527  | -0.76986 | 0.013478 | -0.14359  | 0.724333 | 0.621393 | 0.156345 |
| AT1G78950 | BAS       | 13.07794 | 12.48972 | 10.30123 | 6.598649 | 3.974804 | 7.974726 | 5.335821 | 10.7889  | 6.833722 | 12.47396  | 6.65167  | 12.43088  | -0.78754 | 0.131857 | -0.53146  | 0.36901  | -0.12282 | NA       |
| AT1G78955 | CAMS1     | 13.07794 | 10.70548 | 11.58889 | 9.897974 | 9.274542 | 13.95577 | 16.89677 | 11.86779 | 5.897476 | 11.51443  | 14.63367 | 15.5386   | -0.12027 | 0.084026 | -0.002725 | 0.396715 | 0.185961 | NA       |
| AT1G78960 | LUP2      | 96.30122 | 135.6027 | 114.6012 | 70.93548 | 57.63465 | 72.76938 | 73.81219 | 98.17898 | 63.45599 | 107.6298  | 94.45371 | 104.6266  | -0.74578 | 0.009002 | -0.53064  | 0.030036 | -0.17235 | 0.706775 |
| AT1G78970 | LUP1      | 269.8812 | 237.3047 | 249.8409 | 35.46774 | 28.48609 | 36.88831 | 42.68657 | 40.04896 | 38.07359 | 133.5142  | 125.0514 | 163.6732  | -2.8049  | 3.98E-38 | -2.26605  | 5.34E-25 | -0.67475 | 0.015687 |
| AT1G78980 | SRF5      | 0        | 0        | 0        | 0        | 0        | 0        | 0        | 0        | 0.976246 | 0         | 0        | 0         | 0        | 1.035907 | 0         | 0        | 0        | NA       |
| AT1G78990 | AT1G78990 | 5.94452  | 7.136984 | 14.1642  | 3.71174  | 7.28714  | 3.987363 | 7.114428 | 8.63112  | 11.71495 | 17.27164  | 15.96401 | 16.5745   | -0.71055 | 0.192867 | -0.00391  | 0.995691 | 0.731699 | NA       |
| AT1G78995 | AT1G78995 | 230.6474 | 335.4383 | 291.0099 | 285.804  | 332.5586 | 195.3808 | 393.0721 | 321.5092 | 476.408  | 401.0859  | 532.1336 | 362.5673  | -0.06294 | 0.842185 | 0.461646  | 0.075412 | 0.575835 | 0.088593 |
| AT1G79000 | HAC1      | 1096.169 | 958.1401 | 800.921  | 470.1538 | 418.6793 | 571.1898 | 621.6231 | 839.3764 | 370.9753 | 746.5187  | 764.942  | 711.6678  | -0.93077 | 9.44E-05 | -0.61558  | 0.015725 | -0.34699 | 0.401157 |
| AT1G79010 | AT1G79010 | 812.0214 | 877.849  | 964.4531 | 1139.504 | 1248.088 | 996.8408 | 910.6468 | 891.1631 | 1380.412 | 1121.697  | 1106.838 | 875.341   | 0.342865 | 0.09233  | 0.255376  | 0.249684 | 0.219914 | 0.52809  |
| AT1G79020 | AT1G79020 | 127.2127 | 135.6027 | 115.8889 | 120.4253 | 104.0074 | 111.6462 | 109.3843 | 116.5201 | 90.79088 | 133.2252  | 109.0874 | 99.44703  | -0.15758 | 0.476881 | -0.24761  | 0.274029 | -0.22382 | 0.530036 |
| AT1G79030 | AT1G79030 | 189.0537 | 189.1301 | 151.9432 | 125.3743 | 115.9318 | 132.5798 | 153.8495 | 148.8868 | 140.5794 | 138.1731  | 106.4267 | 174.0323  | -0.4908  | 0.014931 | -0.24776  | 0.286959 | -0.3197  | 0.331569 |
| AT1G79040 | PSBR      | 17275.96 | 19742.68 | 18976.16 | 17850.58 | 14099.95 | 9542.757 | 13518.3  | 12921.86 | 26663.23 | 15412.06  | 16375.08 | 24005.06  | -0.40881 | 0.182502 | -0.07234  | 0.855229 | -0.00492 | 0.995156 |
| AT1G79050 | RECA      | 267.5034 | 131.2421 | 204.737  | 349.316  | 335.8709 | 338.9259 | 353.0535 | 308.5625 | 420.762  | 290.7393  | 267.3971 | 260.0125  | 0.385007 | 0.036472 | 0.648395  | 0.012962 | 0.067877 | 0.783864 |
| AT1G79060 | AT1G79060 | 36.85602 | 49.95889 | 33.47901 | 35.05532 | 35.11077 | 37.87995 | 31.12562 | 32.3667  | 28.31113 | 38.38143  | 41.24035 | 38.32854  | -0.12874 | 0.718796 | -0.34415  | 0.326816 | -0.00596 | 0.993976 |
| AT1G79070 | AT1G79070 | 40.42273 | 60.66437 | 69.23363 | 78.35896 | 101.3575 | 78.75042 | 67.58706 | 65.81229 | 57.99851 | 59.49121  | 66.5167  | 62.15439  | 0.586214 | 0.021917 | 0.165047  | 0.621025 | 0.140256 | 0.805717 |
| AT1G79075 | AT1G79075 | 9.511232 | 14.27397 | 9.01358  | 18.14629 | 21.19895 | 2.990522 | 14.22886 | 6.47334  | 39.04984 | 17.27164  | 27.93701 | 22.78994  | 0.302033 | 0.644621 | 0.66158   | 0.285364 | 0.798779 | 0.866371 |
| AT1G79080 | AT1G79080 | 149.8019 | 158.7799 | 144.2173 | 154.2434 | 158.3297 | 161.4882 | 127.1704 | 152.1235 | 166.9381 | 152.5662  | 127.7121 | 135.3078  | 0.066324 | 0.76784  | -0.01963  | 0.939798 | -0.1107  | 0.773363 |
| AT1G79090 | AT1G79090 | 475.5616 | 403.2396 | 379.858  | 287.4537 | 328.5838 | 321.9796 | 391.2935 | 407.8204 | 322.1612 | 338.5611  | 424.3765 | 385.7532  | -0.42262 | 0.0093   | -0.16567  | 0.389032 | -0.13545 | 0.667733 |
| AT1G79100 | AT1G79100 | 0        | 0        | 0        | 0.412416 | 0        | 0        | 0.889303 | 0        | 0        | 0.1919071 | 0        | 0.1035907 | 0.04571  | NA       | 0.152525  | NA       | 0.501374 | NA       |
| AT1G79110 | BRG2      | 114.1348 | 139.1712 | 105.5877 | 204.7905 | 197.4152 | 146.5356 | 169.857  | 161.8335 | 184.5105 | 99.79171  | 98.44471 | 100.4829  | 0.627871 | 0.001332 | 0.253195  | 0.011317 | -0.24502 | 0.514241 |
| AT1G79120 | AT1G79120 | 11.88904 | 7.136984 | 3.862963 | 7.42348  | 11.26194 | 14.95261 | 8.893035 | 9.710009 | 11.71495 | 10.55489  | 11.97301 | 13.46678  | 0.37445  | 0.51397  | 0.294288  | 0.648059 | 0.499456 | NA       |
| AT1G79130 | SAURAO    | 0        | 0        | 0        | 0        | 0        | 0        | 0        | 1.07889  | 0        | 0         | 0        | 0         | 0        | 1.035907 | 0         | 0        | 0        | NA       |
| AT1G79150 | AT1G79150 | 278.2035 | 217.678  | 195.7235 | 178.9884 | 199.4026 | 181.425  | 173.4142 | 173.7013 | 215.7504 | 225.4909  | 219.5051 | 258.9766  | -0.30359 | 0.115104 | -0.2952   | 0.151713 | 0.022076 | 0.964839 |
| AT1G79160 |           |          |          |          |          |          |          |          |          |          |           |          |           |          |          |           |          |          |          |

|           |           |          |          |          |          |          |          |          |          |          |          |          |          |          |          |           |           |           |           |
|-----------|-----------|----------|----------|----------|----------|----------|----------|----------|----------|----------|----------|----------|----------|----------|----------|-----------|-----------|-----------|-----------|
| AT1G79680 | WAKL10    | 2.377808 | 19.62671 | 9.01358  | 117.9509 | 131.1685 | 177.4377 | 227.6617 | 245.9869 | 202.0829 | 5.757214 | 6.65167  | 10.35907 | 3.500114 | 1.15E-26 | 4.152565  | 1.82E-37  | -0.26658  | 0.768619  |
| AT1G79690 | NUDT3     | 619.419  | 556.6848 | 601.3346 | 658.6727 | 573.6967 | 723.7064 | 807.4876 | 762.7752 | 534.0066 | 551.733  | 498.8752 | 614.2926 | 0.132533 | 0.529482 | 0.232757  | 0.246361  | -0.09252  | 0.813188  |
| AT1G79700 | AT1G79700 | 83.22328 | 94.56504 | 101.7247 | 78.77137 | 75.52127 | 105.6651 | 89.81965 | 106.8101 | 97.3871  | 94.03449 | 71.83803 | 91.15977 | -0.11747 | 0.668917 | 0.117889  | 0.6887243 | -0.10488  | 0.840708  |
| AT1G79710 | AT1G79710 | 53.50068 | 37.46917 | 59.2321  | 48.66504 | 36.4357  | 59.81045 | 48.91169 | 55.02339 | 27.33489 | 50.85539 | 65.18636 | 30.04129 | -0.06977 | 0.876872 | -0.19349  | 0.664464  | -0.06059  | 0.947036  |
| AT1G79720 | AT1G79720 | 117.7015 | 149.8767 | 121.0395 | 46.19054 | 56.30972 | 79.74726 | 56.02612 | 66.89118 | 35.14486 | 68.89128 | 90.46271 | 94.26749 | -1.06326 | 0.307589 | -1.22995  | 2.99E-06  | -0.53041  | 0.185831  |
| AT1G79730 | VIP2      | 337.6487 | 324.7328 | 305.1741 | 360.0388 | 347.1329 | 312.0112 | 365.5031 | 370.0592 | 368.0447 | 272.5081 | 339.2352 | 254.833  | 0.078799 | 0.665897 | 0.186877  | 0.278808  | -0.16353  | 0.557232  |
| AT1G79740 | AT1G79740 | 315.0595 | 305.1061 | 327.0642 | 261.4715 | 190.7906 | 275.1281 | 240.1119 | 288.0636 | 148.3894 | 264.8318 | 296.6645 | 310.772  | -0.37014 | 1.125716 | -0.47077  | 0.0553    | -0.11612  | 0.815899  |
| AT1G79750 | NADP-ME4  | 1660.899 | 1489.845 | 1243.874 | 876.7955 | 930.1041 | 991.8566 | 957.7798 | 1171.674 | 1027.011 | 135.0216 | 1187.988 | 1195.372 | -0.64378 | 3.6E-06  | -0.47176  | 0.001182  | -0.23114  | 0.329793  |
| AT1G79760 | DTA4      | 14.26685 | 8.92123  | 9.01358  | 2.062078 | 4.637271 | 0.996841 | 2.66791  | 0        | 1.952492 | 10.55489 | 5.321336 | 9.323159 | -1.47978 | 0.009095 | -1.77792  | 0.002609  | -0.2615   | NA        |
| AT1G79770 | AT1G79770 | 8.323228 | 12.48972 | 27.04074 | 16.90904 | 11.92441 | 11.96209 | 12.45025 | 5.39445  | 7.809968 | 0.995356 | 7.982004 | 15.5386  | -0.1697  | 0.778584 | -0.71779  | 0.195162  | -0.42881  | NA        |
| AT1G79780 | AT1G79780 | 0        | 1.784246 | 0        | 0        | 0        | 0        | 0        | 0        | 0        | 0.995936 | 0        | 0        | -0.26756 | NA       | -0.24986  | NA        | -0.06955  | NA        |
| AT1G79790 | AT1G79790 | 321.0041 | 312.2431 | 387.584  | 275.0812 | 268.2992 | 231.2671 | 195.6468 | 224.4091 | 343.6386 | 350.2035 | 323.2712 | 313.8797 | -0.38502 | 0.076276 | -0.40898  | 0.069889  | -0.04774  | 0.927039  |
| AT1G79800 | ENODL7    | 0        | 0        | 0        | 0        | 0.662467 | 0.996841 | 0        | 0        | 1.919071 | 0        | 1.436260 | 0        | 0.230717 | NA       | 0         | NA        | 0.87708   | NA        |
| AT1G79810 | PEX2      | 148.613  | 176.6404 | 189.2852 | 187.2367 | 193.4404 | 180.4282 | 203.6505 | 203.9102 | 188.4155 | 172.7164 | 163.6311 | 168.8528 | 0.129563 | 0.489286 | 0.212912  | 0.255157  | -0.01975  | 0.963536  |
| AT1G79820 | SGB1      | 128.4016 | 74.93833 | 93.99877 | 101.0418 | 98.04516 | 103.6714 | 71.14428 | 75.5223  | 65.40848 | 88.27228 | 86.47171 | 102.5547 | 0.004288 | 0.989244 | -0.49237  | 0.04407   | -0.11532  | 0.815889  |
| AT1G79830 | GC5       | 1521.797 | 1464.866 | 1377.79  | 938.0703 | 889.6935 | 1167.301 | 1159.652 | 1441.397 | 1114.873 | 1471.928 | 1472.68  | 1361.181 | -0.53762 | 0.000218 | -0.22942  | 0.169741  | -0.01938  | 0.961629  |
| AT1G79840 | GL2       | 71.33424 | 90.99655 | 78.5479  | 75.05963 | 69.55966 | 81.74094 | 80.92662 | 80.91675 | 70.28971 | 109.3871 | 87.80204 | 89.08796 | -0.08104 | 0.717188 | -0.03895  | 0.902039  | 0.26085   | 0.509742  |
| AT1G79850 | RPS17     | 957.0677 | 967.0613 | 960.5901 | 673.0622 | 606.1576 | 548.2624 | 618.0669 | 691.5685 | 126.2519 | 192.1598 | 1098.856 | 1088.558 | -0.63436 | 0.005625 | -0.15829  | 0.581255  | 0.13328   | 0.7818    |
| AT1G79860 | ROPGEF12  | 0        | 0        | 0        | 0        | 0        | 0        | 0        | 0        | 0        | 1.330334 | 0        | 0        | 0        | NA       | 0         | NA        | 0.172362  | NA        |
| AT1G79870 | HRP2      | 425.6276 | 387.1814 | 355.3926 | 367.4623 | 372.9691 | 329.9543 | 301.4739 | 312.8781 | 554.5077 | 355.9877 | 319.2802 | 409.1831 | -0.12102 | 0.662401 | 0.000396  | 0.998932  | -0.10278  | 0.9241389 |
| AT1G79880 | LA2       | 148.613  | 178.4246 | 172.5457 | 207.0326 | 247.7628 | 194.384  | 197.4254 | 203.9102 | 233.3228 | 143.9033 | 194.2288 | 158.4937 | 0.377705 | 0.047262 | 0.342652  | 0.093111  | -0.01115  | 0.984206  |
| AT1G79890 | AT1G79890 | 15.45575 | 19.62671 | 16.79351 | 13.60971 | 13.91181 | 12.95893 | 11.41428 | 9.710009 | 4.88123  | 25.90746 | 14.63367 | 11.39497 | -0.28772 | 0.572374 | -0.132693 | 0.034651  | -0.036176 | NA        |
| AT1G79900 | BAC2      | 8.323228 | 0        | 3.862963 | 5.361402 | 9.274542 | 3.987363 | 5.335821 | 2.15778  | 9.76246  | 2.878607 | 5.321336 | 0        | 0.351962 | 0.632574 | 0.264066  | 0.746023  | -0.39464  | NA        |
| AT1G79910 | AT1G79910 | 11.88904 | 39.25341 | 18.02716 | 23.9201  | 23.18635 | 20.93366 | 35.57214 | 23.73558 | 39.07973 | 19.19071 | 39.91002 | 23.82585 | 0.035352 | 0.949512 | 0.485381  | 0.293838  | 0.262259  | 0.754476  |
| AT1G79915 | HSP70-15  | 2.377808 | 0        | 0        | 1.649662 | 1.987402 | 1.993682 | 1.778607 | 3.23667  | 1.952492 | 1.919071 | 2.660668 | 0        | 0.383053 | 0.607444 | 0.531803  | 0.478661  | 0.227012  | NA        |
| AT1G79920 | HSP70-14  | 135.728  | 1116.938 | 1026.261 | 733.6873 | 709.5024 | 881.2072 | 788.8122 | 950.502  | 772.2106 | 973.9287 | 967.1528 | 895.0232 | -0.58537 | 0.0001   | -0.4735   | 0.002565  | -0.3003   | 0.205579  |
| AT1G79930 | HSP70-14  | 1055.747 | 815.4004 | 843.4136 | 732.8625 | 715.4647 | 872.2357 | 748.7935 | 859.8753 | 783.9255 | 814.6457 | 806.1824 | 690.9497 | -0.228   | 0.160018 | -0.18251  | 0.299889  | -0.23114  | 0.353602  |
| AT1G79940 | ERD12A    | 651.5194 | 565.606  | 548.5407 | 506.4463 | 435.9035 | 579.1645 | 455.3234 | 583.6795 | 632.6074 | 505.6753 | 364.5115 | 539.7073 | -0.21252 | 0.325377 | -0.07883  | 0.761965  | -0.31449  | 0.313952  |
| AT1G79950 | AT1G79950 | 234.2141 | 219.4623 | 178.984  | 179.4008 | 175.5538 | 186.4092 | 159.1853 | 185.691  | 146.369  | 168.8783 | 206.2018 | 178.1759 | -0.22126 | 0.244162 | -0.35926  | 0.059633  | -0.19422  | 0.547101  |
| AT1G79960 | OPF14     | 34.47821 | 21.41095 | 25.75309 | 28.86909 | 31.13596 | 34.88943 | 19.56468 | 23.73558 | 21.47741 | 19.19071 | 25.27635 | 9.323159 | 0.174413 | 0.686269 | -0.3266   | 0.465639  | -0.58304  | 0.354125  |
| AT1G79970 | AT1G79970 | 265.1256 | 233.7362 | 247.2296 | 232.6024 | 238.4882 | 224.2892 | 243.6692 | 233.0402 | 295.8205 | 242.7625 | 214.1838 | 258.9766 | -0.10255 | 0.586276 | 0.045862  | 0.835432  | -0.05872  | 0.875722  |
| AT1G79980 | AT1G79980 | 0        | 0        | 0        | 0        | 0        | 0        | 0.976246 | 0        | 0        | 0        | 0        | 1.035907 | 0        | NA       | 0         | NA        | 0.157349  | NA        |
| AT1G79990 | AT1G79990 | 894.0558 | 867.1436 | 750.7025 | 825.656  | 779.724  | 886.1915 | 731.8968 | 865.2697 | 784.9018 | 844.3914 | 832.7891 | 770.1745 | -0.01249 | 0.94386  | -0.07621  | 0.641747  | -0.03644  | 0.905161  |
| AT1G80000 | AT1G80000 | 360.2379 | 412.1608 | 319.3383 | 360.8636 | 290.1607 | 315.9985 | 319.2599 | 338.7714 | 324.1137 | 336.797  | 341.8958 | 281.7666 | -0.16251 | 0.361558 | -0.14514  | 0.453298  | -0.17774  | 0.540551  |
| AT1G80010 | FRS8      | 221.1361 | 167.7191 | 184.1346 | 137.3344 | 123.8814 | 128.5925 | 128.949  | 161.8335 | 140.5794 | 161.202  | 152.9884 | 128.4524 | -0.54848 | 0.002602 | -0.4124   | 0.037031  | -0.37288  | 0.189516  |
| AT1G80020 | AT1G80020 | 357.8601 | 235.5205 | 224.0519 | 186.4118 | 131.1685 | 178.4345 | 160.0746 | 203.9102 | 155.2231 | 189.0285 | 187.5771 | 212.3609 | -0.7018  | 0.00143  | -0.64067  | 0.005201  | -0.46204  | 0.168465  |
| AT1G80030 | AT1G80030 | 626.5524 | 453.1985 | 511.1988 | 279.6178 | 321.9591 | 289.0838 | 388.8246 | 390.5582 | 446.1444 | 544.0567 | 554.7493 | 541.7791 | -0.82851 | 7.54E-08 | -0.43505  | 0.009342  | -0.038453 | 0.924189  |
| AT1G80040 | AT1G80040 | 526.6844 | 653.034  | 508.6235 | 732.8625 | 795.6232 | 646.9497 | 612.7301 | 616.0462 | 680.4435 | 568.0451 | 663.8367 | 485.8402 | 0.365679 | 0.027333 | 0.17866   | 0.353391  | 0.026286  | 0.952068  |
| AT1G80050 | APT2      | 217.5694 | 212.3253 | 235.6407 | 174.8642 | 130.5061 | 122.6114 | 84.48383 | 74.44341 | 128.6465 | 268.67   | 218.1748 | 227.8994 | -0.60591 | 0.067182 | -1.16613  | 0.961E-08 | 0.101607  | 0.838129  |
| AT1G80060 | AT1G80060 | 22.58917 | 24.97944 | 34.76667 | 32.58083 | 16.56168 | 19.93682 | 20.45398 | 17.26224 | 18.54867 | 44.13864 | 33.25835 | 26.93357 | -0.19784 | 0.663718 | -0.49009  | 0.27      | 0.315121  | 0.659633  |
| AT1G80070 | SUS2      | 2714.268 | 1832.421 | 1697.128 | 946.4937 | 758.525  | 1272.966 | 1302.83  | 1634.518 | 855.1915 | 1552.529 | 1540.527 | 1535.213 | -1.02425 | 2.85E-05 | -0.68947  | 0.007892  | -0.41419  | 0.30711   |
| AT1G80080 | TMM       | 86.78999 | 73.15409 | 72.10864 | 75.88447 | 77.50867 | 89.71567 | 56.91542 | 84.15342 | 90.79088 | 52.77446 | 57.20436 | 65.26211 | 0.050501 | 0.873744 | -0.01213  | 0.972376  | -0.39366  | 0.340335  |
| AT1G80090 | PV42B     | 0        | 0        | 0        | 0        | 0        | 0        | 0        | 0        | 0        | 0        | 0        | 2.660668 | 0.071813 | 0        | NA        | 0         | 0.691027  | NA        |
| AT1G80100 | AHP6      | 0        | 1.784246 | 1.287654 | 2.062078 | 1.987402 | 0.996841 | 1.778607 | 2.15778  | 0        | 2.878607 | 1.330334 | 5.179533 | 0.297806 | 0.700047 | 0.115979  | 0.893948  | 0.757595  | NA        |
| AT1G80110 | PP2B11    | 22.58917 | 23.19572 | 25.75309 | 56.50093 | 56.97219 | 44.85784 | 44.02239 | 63.65451 | 71.26596 | 18.23118 | 19.95501 | 19.6822  | 1.083257 | 0.000354 | 1.261927  | 3.75E-05  | -0.28514  | 0.677954  |
| AT1G80120 | AT1G80120 | 7.133424 | 12.48972 | 2.575309 | 27.21943 | 27.82363 | 14.95261 | 21.33328 | 23.73558 | 16.85981 | 9.593536 | 14.63367 | 10.35907 | 1.401099 | 0.002835 | 1.721591  | 0.000232  | 0.492110  | 0.594257  |
| AT1G80130 | AT1G80130 | 117.7015 | 208.7568 | 128.7654 | 167.0283 | 181.516  | 117.6272 | 28.45771 | 23.73558 | 24.40615 | 128.5778 | 122.3907 | 101.5188 | 0.060165 | 0.855909 | -2.3841   | 6.69E-19  | -0.3377   | 0.44921   |
| AT1G80133 | EPFL8     | 0        | 0        | 0        | 0        | 0        | 0        | 0        | 0        | 0        | 0        | 0        | 0        | #N/A     | #N/A     | #N/A      | #N/A      | #N/A      | #N/A      |
| AT1G80140 | AT1G80140 | 43.98945 | 32.11643 | 43.78025 | 56.08852 | 58.95959 | 50.83888 | 51.78672 | 39.04984 | 35.50282 | 39.91002 | 39.1002  | 47.2717  | 0.433891 | 0.13354  | 0.250343  | 0.464893  | -0.04608  | 0.952547  |
| AT1G80150 | AT1G80150 | 11.88904 | 7.136984 | 9.01358  | 150.9441 | 193.4404 | 200.365  | 192.0896 | 169.3857 | 115.197  | 13.4335  | 26.60668 | 6.215439 | 3.767268 | 1.82E-28 | 3.584706  | 1.82E-25  | 0.44217   | 0.561641  |
| AT1G80170 | AT1G80170 | 67.76752 | 89.2123  | 123.6148 | 87.84452 | 92.74542 | 91.70935 | 7        |          |          |          |          |          |          |          |           |           |           |           |

|           |           |          |          |          |          |          |          |          |          |          |          |          |          |           |          |          |          |          |          |          |
|-----------|-----------|----------|----------|----------|----------|----------|----------|----------|----------|----------|----------|----------|----------|-----------|----------|----------|----------|----------|----------|----------|
| AT1G80680 | NUP96     | 527.8734 | 463.904  | 404.3235 | 261.0591 | 278.8987 | 312.0112 | 352.1642 | 377.6115 | 252.8477 | 360.7854 | 332.5835 | 363.6032 | -0.70317  | 5.01E-05 | -0.49745 | 0.007008 | -0.39253 | 0.136881 |          |
| AT1G80690 | AT1G80690 | 87.97589 | 64.23286 | 110.7383 | 44.9533  | 52.99738 | 43.86099 | 60.47264 | 46.39227 | 66.38473 | 102.6703 | 99.77505 | 106.6984 | -0.87094  | 0.000278 | -0.58919 | 0.024234 | 0.211042 | 0.644845 |          |
| AT1G80700 | AT1G80700 | 135.535  | 165.9349 | 142.9296 | 191.3608 | 231.8635 | 156.504  | 180.5286 | 122.9935 | 250.8952 | 174.6355 | 184.9164 | 136.7397 | 0.375177  | 0.173746 | 0.311454 | 0.297406 | 0.154428 | 0.778443 |          |
| AT1G80710 | DRS1      | 32.10041 | 26.76369 | 36.05432 | 25.15735 | 19.21155 | 20.93366 | 24.9005  | 17.26224 | 10.73871 | 27.82653 | 19.95501 | 26.93357 | -0.48773  | 0.201631 | -0.76298 | 0.054385 | -0.31207 | 0.653508 |          |
| AT1G80720 | AT1G80720 | 74.90055 | 66.0171  | 69.53333 | 64.33683 | 76.18374 | 69.77885 | 56.02612 | 64.7334  | 55.64602 | 75.80331 | 63.85603 | 75.62118 | -0.01273  | 0.967267 | -0.25515 | 0.360718 | 0.032863 | 0.958691 |          |
| AT1G80730 | ZFP1      | 1.784246 | 1.784246 | 1.725926 | 1.237247 | 1.987402 | 3.987363 | 0.889303 | 2.15778  | 3.904984 | 3.881143 | 10.64267 | 3.10772  | -0.70415  | 0.296787 | -0.64507 | 0.377299 | 0.152017 | 0.0      |          |
| AT1G80740 | CMT1      | 0        | 1.784246 | 1.287654 | 1.237247 | 0        | 0        | 0.889303 | 2.15778  | 0        | 0        | 2.660668 | 0        | -0.22935  | 0.730138 | 0.021544 | 0.977403 | -0.05914 | NA       |          |
| AT1G80745 | AT1G80745 | 2.377808 | 1.784246 | 1.287654 | 3.299325 | 1.987402 | 3.987363 | 2.66791  | 1.07889  | 0        | 4.797678 | 2.660668 | 1.035907 | -0.402544 | 0.959073 | -0.2333  | 0.783715 | 0.322836 | NA       |          |
| AT1G80750 | RPL7A     | 252.0476 | 281.9109 | 330.9272 | 340.6553 | 396.8179 | 340.9195 | 337.9353 | 293.4581 | 379.7597 | 298.4156 | 255.4241 | 341.8492 | 0.312363  | 0.091812 | 0.221954 | 0.28006  | 0.053001 | 0.901185 |          |
| AT1G80760 | NIP6-1    | 227.0807 | 130.25   | 168.6827 | 93.61834 | 78.17114 | 68.78201 | 38.24005 | 50.70783 | 35.14486 | 242.7625 | 223.4961 | 156.4219 | -1.07754  | 1.21E-05 | -1.98728 | 6.7E-15  | 0.225    | 0.636505 |          |
| AT1G80770 | PE3E18    | 518.3621 | 538.8423 | 588.458  | 552.6369 | 561.7722 | 549.2593 | 611.8408 | 583.6795 | 569.1514 | 563.2474 | 508.1876 | 561.4613 | 0.015529  | 0.921954 | 0.100093 | 0.481808 | -0.00896 | 0.979097 |          |
| AT1G80780 | CAF1-6    | 655.0861 | 649.4656 | 643.8272 | 661.1022 | 755.8752 | 601.095  | 669.6455 | 646.2551 | 698.0159 | 645.7675 | 681.131  | 570.7845 | 0.052321  | 0.754664 | 0.04739  | 0.794124 | -0.0392  | 0.901703 |          |
| AT1G80790 | FDM5      | 577.8073 | 533.4896 | 497.0346 | 380.2472 | 374.9565 | 407.7079 | 323.7065 | 453.1338 | 486.1705 | 441.3864 | 416.3945 | 488.9479 | -0.4614   | 0.006165 | -0.34462 | 0.057275 | -0.25061 | 0.371122 |          |
| AT1G80800 | AT1G80800 | 97.49012 | 119.5445 | 95.28642 | 83.72036 | 102.6824 | 94.69987 | 91.59826 | 75.78587 | 65.40848 | 154.4852 | 142.3457 | 103.5907 | -0.14286  | 0.603286 | -0.3784  | 0.149769 | 0.35645  | 0.337907 |          |
| AT1G80810 | AT1G80810 | 177.1467 | 160.5821 | 115.8889 | 116.3012 | 134.4809 | 138.5609 | 162.7425 | 154.2813 | 189.3917 | 134.335  | 147.6671 | 126.3800 | -0.22198  | 0.319358 | 0.157121 | 0.52479  | -0.14966 | 0.715123 |          |
| AT1G80820 | CCR2      | 5.94452  | 3.568492 | 5.150617 | 45.36571 | 37.76063 | 57.81677 | 32.90423 | 43.1556  | 30.26363 | 9.595356 | 6.65167  | 11.39497 | 2.674296  | 5.2E-11  | 2.288121 | 5.71E-08 | 0.590551 | 0.486936 |          |
| AT1G80830 | NRAMP1    | 338.8376 | 242.6575 | 320.6259 | 461.493  | 413.3796 | 464.5278 | 487.3383 | 489.816  | 342.6623 | 379.0166 | 309.9678 | 362.5673 | 0.549427  | 0.003161 | 0.528596 | 0.005956 | 0.210735 | 0.540008 |          |
| AT1G80831 | AT1G80831 | 0        | 0        | 0        | 0        | 0        | 0        | 0.889303 | 0        | 0        | 0        | 0        | 0        | 0         | 0        | 0        | 0        | 0        | NA       |          |
| AT1G80840 | WRKY40    | 21.40027 | 19.62671 | 16.73951 | 299.0013 | 326.5964 | 571.1898 | 57.4465  | 625.7562 | 759.5194 | 14.39303 | 23.94601 | 25.8976  | 4.024369  | 5.04E-44 | 4.815085 | 4.44E-63 | 0.082838 | 0.927039 |          |
| AT1G80850 | AT1G80850 | 71.33424 | 92.78079 | 84.98519 | 122.8998 | 137.7932 | 111.6462 | 104.0485 | 99.25787 | 88.83839 | 82.52006 | 69.17737 | 87.01615 | 0.235382  | 0.005231 | 0.235382 | 0.357569 | -0.03999 | 0.945973 |          |
| AT1G80860 | PLMT      | 137.9129 | 140.9554 | 157.0938 | 197.5471 | 176.2163 | 171.4566 | 160.9639 | 171.5435 | 150.3419 | 156.4043 | 134.3637 | 132.596  | 0.323006  | 0.071532 | 0.141784 | 0.514475 | -0.03893 | 0.932481 |          |
| AT1G80865 | AT1G80865 | 0        | 3.568492 | 0        | 0        | 0.662467 | 0        | 0        | 0        | 1.952492 | 0.959536 | 0        | 1.035907 | -0.8856   | NA       | -0.14578 | NA       | -0.12802 | NA       |          |
| AT1G80870 | AT1G80870 | 236.5919 | 194.4828 | 176.4086 | 140.6337 | 135.1433 | 145.5388 | 119.1667 | 124.0723 | 143.5082 | 179.4332 | 206.2018 | 209.2531 | -0.52371  | 0.002739 | -0.64234 | 0.000368 | -0.03615 | 0.936323 |          |
| AT1G80880 | AT1G80880 | 19.02246 | 24.97944 | 43.78025 | 21.03319 | 25.17376 | 13.95577 | 32.90423 | 28.05114 | 16.59618 | 33.58375 | 21.28534 | 32.1131  | -0.47038  | 0.272602 | -0.15964 | 0.761174 | -0.00154 | 0.998413 |          |
| AT1G80890 | 64.20081  | 58.88012 | 69.53333 | 151.3565 | 153.6924 | 116.6304 | 106.7164 | 83.07453 | 196.2254 | 81.56053 | 87.80204 | 93.23159 | 1.064665 | 0.000182  | 0.93859  | 0.001521 | 0.410592 | 0.421518 | 0.144964 | 0.794473 |
| AT1G80900 | MR52-10   | 55.87849 | 49.95889 | 52.79383 | 61.03751 | 62.27192 | 62.80097 | 72.92289 | 65.81229 | 45.88356 | 61.41028 | 58.53469 | 56.97486 | 0.2125    | 0.465891 | 0.205001 | 0.518073 | -0.27974 | 0.533891 |          |
| AT1G80910 | AT1G80910 | 153.3686 | 181.9931 | 160.9568 | 143.933  | 172.2415 | 173.4503 | 184.0588 | 153.2024 | 140.5794 | 118.9824 | 130.3727 | 169.8887 | -0.01971  | 0.943467 | -0.04467 | 0.875381 | -0.22974 | 0.533891 |          |
| AT1G80920 | ATJ8      | 2817.702 | 3693.389 | 3069.768 | 3011.871 | 3008.926 | 2817.072 | 3262.854 | 3277.668 | 4133.426 | 2824.873 | 2881.503 | 3074.571 | -0.11354  | 0.498252 | 0.154956 | 0.358066 | -0.12298 | 0.653508 |          |
| AT1G80930 | AT1G80930 | 1223.382 | 879.6333 | 1001.795 | 846.2768 | 902.2804 | 815.4158 | 941.7724 | 974.2376 | 1004.557 | 789.6978 | 858.0654 | 919.885  | -0.27548  | 0.063131 | -0.09073 | 0.616169 | -0.27431 | 0.208473 |          |
| AT1G80940 | AT1G80940 | 301.9816 | 322.9483 | 307.7494 | 372.4113 | 374.9565 | 330.9511 | 379.7326 | 327.9825 | 457.8594 | 275.3867 | 307.3071 | 418.5062 | 0.208408  | 0.32627  | 0.316259 | 0.132621 | 0.101721 | 0.805717 |          |
| AT1G80950 | LPEA1T    | 254.4254 | 278.3424 | 254.9556 | 322.509  | 297.4478 | 307.027  | 305.0311 | 225.488  | 245.0737 | 261.9532 | 295.3341 | 257.9407 | 0.23649   | 0.161914 | -0.015   | 0.945883 | 0.048896 | 0.898488 |          |
| AT1G80960 | AT1G80960 | 101.0568 | 105.2705 | 123.6148 | 108.4653 | 107.9822 | 104.6683 | 80.04104 | 91.70564 | 74.1947  | 92.11542 | 101.1054 | 80.80071 | -0.03649  | 0.890243 | -0.36988 | 0.10124  | -0.26785 | 0.456762 |          |
| AT1G80970 | AT1G80970 | 11.88904 | 7.136984 | 21.89012 | 19.79595 | 21.19895 | 10.96525 | 12.45025 | 18.34113 | 18.54867 | 13.4335  | 15.96401 | 21.75404 | 0.291873  | 0.571519 | 0.187853 | 0.725081 | 0.239027 | 0.808334 |          |
| AT1G80980 | AT1G80980 | 140.2907 | 158.7979 | 160.9568 | 195.485  | 208.6772 | 138.5609 | 177.8607 | 160.7546 | 230.3941 | 176.5546 | 224.8264 | 159.5296 | 0.241689  | 0.331144 | 0.29557  | 0.241282 | 0.732303 | 0.491396 |          |
| AT1G80990 | AT1G80990 | 1.188904 | 1.784246 | 0        | 0.412416 | 0        | 0        | 0.889303 | 0        | 0        | 0        | 0        | 0        | -0.40146  | NA       | -0.29287 | NA       | -0.48079 | NA       |          |
| AT1G81001 | AT1G81001 | 26.15589 | 33.90067 | 32.19136 | 27.63184 | 25.83622 | 31.8989  | 28.45771 | 21.5778  | 32.32161 | 23.02886 | 22.61568 | 31.0772  | -0.1024   | 0.80639  | -0.13485 | 0.764258 | -0.22768 | 0.744093 |          |
| AT1G81020 | AT1G81020 | 0        | 0        | 0        | 0        | 0        | 0        | 0        | 0.976246 | 0.959536 | 0        | 0        | 0        | 0         | 0        | 0        | 0        | 0.146371 | NA       |          |
| AT2G01000 | AT2G01000 | 40.42273 | 28.54794 | 12.87654 | 16.90904 | 21.86142 | 22.92734 | 57.80473 | 40.99782 | 50.76479 | 21.10978 | 31.92802 | 43.50807 | -0.39389  | 0.363157 | 0.791159 | 0.046813 | 0.204258 | 0.805391 |          |
| AT2G01010 | AT2G01010 | 28068.83 | 23894.62 | 13027.2  | 12560.94 | 13116.85 | 13917.89 | 8181.592 | 13204.53 | 24260.69 | 12947.01 | 6263.212 | 19891.48 | -0.59861  | 0.241237 | -0.42762 | 0.446628 | -0.61363 | 0.442058 |          |
| AT2G01020 | AT2G01020 | 46.36725 | 42.8219  | 36.05432 | 34.64291 | 31.13596 | 17.94313 | 30.23632 | 46.39227 | 41.00233 | 32.62421 | 26.60668 | 44.54398 | -0.49901  | 0.154146 | -0.08905 | 0.845978 | -0.23992 | 0.721299 |          |
| AT2G01021 | AT2G01021 | 265.1256 | 171.2876 | 39.91728 | 84.54519 | 102.6824 | 66.78833 | 99.61939 | 111.1257 | 194.273  | 44.13864 | 30.59768 | 141.9192 | -0.64117  | 0.316313 | -0.16852 | 0.831868 | -0.79515 | 0.410963 |          |
| AT2G01022 | AT2G01022 | 0        | 3.568492 | 0        | 0.824831 | 0        | 0        | 2.66791  | 1.07889  | 0        | 0        | 2.660668 | 0        | -0.3234   | 0.604463 | 0.084127 | 0.908149 | -0.081   | NA       |          |
| AT2G01023 | AT2G01023 | 3.566712 | 0        | 0        | 0.824831 | 2.649869 | 0        | 2.66791  | 2.15778  | 2.928738 | 2.878607 | 2.660668 | 3.10772  | -0.10705  | 0.899131 | 0.430103 | 0.581472 | 0.510748 | NA       |          |
| AT2G01024 | AT2G01024 | 0        | 0        | 0        | 0        | 0        | 0        | 0        | 0        | 0        | 0        | 0        | 0        | #N/A      | #N/A     | #N/A     | #N/A     | #N/A     | #N/A     |          |
| AT2G01026 | AT2G01026 | 1.188904 | 0        | 0        | 0        | 0.662467 | 0        | 0        | 0        | 0        | 0        | 0        | 0        | -0.07436  | NA       | -0.18968 | NA       | -0.18606 | NA       |          |
| AT2G01028 | AT2G01028 | 0        | 0        | 0        | 0        | 0        | 0        | 3.557214 | 0        | 0        | 0        | 0        | 0        | 0         | NA       | 0.434799 | NA       | 0        | NA       |          |
| AT2G01029 | AT2G01029 | 0        | 3.568492 | 3.862963 | 2.886909 | 1.324935 | 0.996841 | 0.889303 | 2.15778  | 0.976246 | 0.959536 | 0        | 1.035907 | -0.13705  | 0.86815  | -0.36222 | 0.647533 | -0.63269 | NA       |          |
| AT2G01031 | AT2G01031 | 0        | 0        | 0        | 0        | 0        | 0        | 0.889303 | 0        | 0        | 0        | 0        | 0        | 0         | NA       | 0.160764 | NA       | 0        | NA       |          |
| AT2G01034 | AT2G01034 | 2.377808 | 1.784246 | 0        | 0.412416 | 0        | 0        | 0        | 2.15778  | 0        | 0        | 0        | 1.035907 | -0.57286  | NA       | -0.25713 | NA       | -0.42023 | NA       |          |
| AT2G01037 | AT2G01037 | 0        | 0        | 0        | 0.412416 | 0        | 0        | 2.66791  | 1.07889  | 0        | 0        | 0        | 0        | 0.050432  | NA       | 0.59442  | NA       | 0        | NA       |          |
| AT2G01040 | AT2G01040 | 1.188904 | 0        | 0        | 0        | 0.662467 | 0.996841 | 2.778607 | 2.15778  | 0        | 0        | 0        | 1.035907 | 0.004787  | NA       | 0.395221 | NA       | -0.05171 | NA       |          |
| AT2G01050 | AT2G01050 | 1.188904 | 0        | 0        | 0        | 0        | 0        | 0        | 0        | 0        | 0        | 0        | 0        | -0.2184   | NA       | -0.20558 | NA       | -0.19918 | NA       |          |
| AT2G01060 | AT2G01060 | 312.6817 | 378.2602 | 440.3778 | 690.3837 | 639.9434 |          |          |          |          |          |          |          |           |          |          |          |          |          |          |

|           |           |          |          |          |          |          |          |          |          |          |          |          |          |          |   |   |   |          |          |           |          |          |          |    |
|-----------|-----------|----------|----------|----------|----------|----------|----------|----------|----------|----------|----------|----------|----------|----------|---|---|---|----------|----------|-----------|----------|----------|----------|----|
| AT2G01554 | AT2G01554 | 0        | 0        | 0        | 0.412416 | 0        | 0.996841 | 0.889303 | 0        | 0        | 0        | 0        | 0        | 0        | 0 | 0 | 0 | 0.238153 | NA       | 0.155534  | NA       | 0.178793 | NA       |    |
| AT2G01560 | AT2G01560 | 0        | 0        | 0        | 0.662467 | 0        | 0.662467 | 0        | 0        | 0        | 0        | 0        | 0        | 0        | 0 | 0 | 0 | 0        | 0.128567 | NA        | 0        | NA       | 0        | NA |
| AT2G01570 | RG4       | 1074.769 | 1116.938 | 1015.959 | 571.1956 | 529.3114 | 704.7664 | 562.9291 | 649.4917 | 428.572  | 884.6918 | 735.6747 | 835.9766 |          |   |   |   | -0.81533 | 1.05E-06 | -0.94769  | 1.37E-08 | -0.37569 | 0.144532 |    |
| AT2G01580 | AT2G01580 | 4.755616 | 0        | 1.287654 | 2.062078 | 0.662467 | 0        | 0.889303 | 0        | 0        | 4.797678 | 3.991002 | 1.035907 |          |   |   |   | -0.42351 | 0.561866 | -0.75014  | 0.278688 | 0.321815 | 0        |    |
| AT2G01590 | RR3       | 373.6487 | 246.226  | 311.6124 | 207.0326 | 225.2389 | 175.444  | 290.802  | 203.9102 | 373.9022 | 312.8086 | 371.1632 | 431.973  |          |   |   |   | -0.54112 | 0.020949 | -0.04546  | 0.889016 | 0.30182  | 0.444309 |    |
| AT2G01600 | AT2G01600 | 474.3727 | 406.8081 | 412.0494 | 384.3731 | 333.8835 | 434.6226 | 412.6368 | 461.7649 | 313.375  | 384.7738 | 387.1272 | 361.5314 |          |   |   |   | -0.16769 | 0.098962 | -0.12332  | 0.574564 | -0.18903 | 0.556761 |    |
| AT2G01610 | AT2G01610 | 60.6341  | 41.03766 | 64.38272 | 80.42104 | 64.25933 | 61.80413 | 87.70527 | 63.65451 | 109.3396 | 61.41028 | 67.84703 | 42.47217 |          |   |   |   | 0.289929 | 0.367635 | 0.574298  | 0.06143  | 0.019841 | 0.982469 |    |
| AT2G01620 | SKIP28    | 249.6698 | 322.9485 | 289.7222 | 309.7241 | 288.1733 | 244.226  | 327.0642 | 379.7693 | 405.1421 | 386.6929 | 460.2956 | 364.6391 |          |   |   |   | -0.01938 | 0.932364 | 0.429695  | 0.011152 | 0.485589 | 0.022346 |    |
| AT2G01630 | AT2G01630 | 216.3805 | 183.7773 | 178.984  | 150.5317 | 150.3801 | 143.5451 | 168.9677 | 186.648  | 124.9595 | 199.5834 | 198.2198 | 172.9964 |          |   |   |   | -0.37503 | 0.051336 | -0.26845  | 0.210125 | -0.02513 | 0.96079  |    |
| AT2G01640 | AT2G01640 | 29.7226  | 35.68492 | 43.78025 | 61.86234 | 72.8714  | 43.86099 | 39.12935 | 30.20892 | 66.38473 | 41.26003 | 41.24035 | 49.72351 |          |   |   |   | 0.671828 | 0.047046 | 0.290831  | 0.479479 | 0.254767 | 0.706832 |    |
| AT2G01650 | PUX2      | 299.6038 | 278.3424 | 251.0926 | 423.9632 | 525.999  | 470.5088 | 438.4266 | 371.1381 | 425.6433 | 239.8839 | 247.4421 | 205.1095 |          |   |   |   | 0.762276 | 3.47E-07 | 0.566551  | 0.00033  | -0.25805 | 0.335661 |    |
| AT2G01660 | CRSP12    | 36.85602 | 19.62671 | 42.49259 | 18.14629 | 15.23675 | 10.96525 | 18.67537 | 10.7889  | 20.50117 | 23.98839 | 23.94601 | 25.89766 |          |   |   |   | -1.03371 | 0.005484 | -0.90266  | 0.024354 | -0.40913 | 0.546547 |    |
| AT2G01667 | AT2G01667 | 0        | 0        | 0        | 0        | 0        | 0        | 0        | 0        | 0        | 0        | 0        | 0        |          |   |   |   | #N/A     | #N/A     | #N/A      | #N/A     | #N/A     | #N/A     |    |
| AT2G01670 | NUD17     | 471.9949 | 524.5683 | 509.9111 | 1477.273 | 1683.329 | 1615.879 | 1337.512 | 1125.282 | 1647.903 | 436.5887 | 518.8302 | 480.6606 |          |   |   |   | 1.63825  | 5.82E-29 | 1.425685  | 5.76E-22 | -0.06859 | 0.856302 |    |
| AT2G01680 | AT2G01680 | 384.016  | 408.5923 | 397.8852 | 400.0431 | 358.3948 | 433.6257 | 332.5995 | 455.2916 | 335.8286 | 365.5831 | 380.4755 | 371.8904 |          |   |   |   | 0.000932 | 0.99720  | -0.0833   | 0.689098 | -0.08847 | 0.796296 |    |
| AT2G01690 | VAC14     | 608.7188 | 588.8012 | 522.7877 | 473.0407 | 407.4174 | 559.2277 | 604.7264 | 581.5217 | 257.7289 | 511.4325 | 643.8816 | 560.4254 |          |   |   |   | -0.24647 | 0.410355 | -0.24093  | 0.446239 | -0.00432 | 0.995545 |    |
| AT2G01700 | AT2G01700 | 0        | 0        | 0        | 0.662467 | 0        | 0.662467 | 0        | 0        | 0        | 0        | 0        | 0        |          |   |   |   | 0.128567 | NA       | 0         | NA       | 0        | NA       |    |
| AT2G01710 | AT2G01710 | 203.3026 | 231.952  | 254.9556 | 258.1721 | 239.1507 | 231.2671 | 203.6505 | 248.1447 | 279.2064 | 207.2597 | 234.1388 | 210.289  |          |   |   |   | 0.082505 | 0.697465 | 0.081134  | 0.72363  | -0.08265 | 0.835431 |    |
| AT2G01720 | OST18     | 657.4639 | 683.3662 | 668.2926 | 809.9842 | 777.0741 | 974.9103 | 731.8968 | 788.6685 | 552.5552 | 600.6693 | 565.3919 | 546.9586 |          |   |   |   | 0.343331 | 0.037002 | 0.044581  | 0.841514 | -0.22523 | 0.409123 |    |
| AT2G01730 | CPSP73-10 | 13.07794 | 19.62671 | 7.725926 | 18.14629 | 22.52389 | 16.94629 | 22.23259 | 18.34113 | 19.52492 | 12.47396 | 11.97301 | 11.39497 |          |   |   |   | 0.496039 | 0.257062 | 0.546339  | 0.252331 | -0.11122 | 0.918783 |    |
| AT2G01740 | RIE1      | 126.0238 | 114.1917 | 128.7654 | 163.3166 | 153.0299 | 136.5672 | 160.9639 | 149.9657 | 150.3419 | 90.19635 | 138.3547 | 11.86176 |          |   |   |   | 0.2919   | 0.159928 | 0.3098    | 0.159337 | -0.13209 | 0.753601 |    |
| AT2G01750 | AT2G01740 | 22.3368  | 23.1952  | 28.3284  | 15.25938 | 22.92734 | 23.18635 | 22.92734 | 18.67537 | 30.20892 | 42.54366 | 24.97633 | 26.60668 | 24.86776 |   |   |   | -0.39574 | 0.311987 | -0.1728   | 0.714512 | -0.07454 | 0.935116 |    |
| AT2G01750 | MAP70.3   | 103.4346 | 96.34929 | 88.84815 | 95.68041 | 74.19633 | 80.7441  | 74.70149 | 86.3112  | 68.33722 | 66.20796 | 58.53469 | 67.33392 |          |   |   |   | -0.18589 | 0.457567 | -0.32479  | 0.19885  | -0.56236 | 0.080933 |    |
| AT2G01755 | AT2G01755 | 83.22328 | 80.29107 | 104.3    | 77.53413 | 79.49607 | 45.85468 | 48.64943 | 71.20674 | 171.8193 | 108.4275 | 109.0874 | 111.8779 |          |   |   |   | -0.35943 | 0.354996 | 0.155385  | 0.733603 | 0.272418 | 0.686424 |    |
| AT2G01760 | ARR14     | 228.2696 | 214.1095 | 256.2432 | 123.7247 | 127.1937 | 133.5767 | 143.1790 | 116.5201 | 130.817  | 310.8895 | 284.6915 | 260.0125 |          |   |   |   | -0.85605 | 4.35E-08 | -0.82363  | 0.438077 | 0.285159 | 0.260245 |    |
| AT2G01770 | VIT1      | 0        | 3.568492 | 0        | 3.299325 | 3.312336 | 3.987363 | 0.889303 | 0        | 2.928738 | 0        | 0        | 0        |          |   |   |   | 0.865812 | 0.188565 | 0.104752  | 0.901066 | -0.52521 | NA       |    |
| AT2G01780 | AT2G01780 | 0        | 0        | 0        | 0        | 0        | 0        | 0        | 0        | 0        | 0        | 0        | 0        |          |   |   |   | #N/A     | #N/A     | #N/A      | #N/A     | #N/A     | #N/A     |    |
| AT2G01790 | AT2G01790 | 0        | 0        | 0        | 0        | 0        | 0        | 0        | 0        | 0        | 0        | 0        | 0        |          |   |   |   | #N/A     | #N/A     | #N/A      | #N/A     | #N/A     | #N/A     |    |
| AT2G01800 | AT2G01800 | 0        | 0        | 0        | 0        | 0        | 0        | 0        | 0        | 0        | 0.959536 | 0        | 1.035907 |          |   |   |   | 0        | NA       | 0         | NA       | 0.332992 | NA       |    |
| AT2G01810 | AT2G01810 | 3.566712 | 0        | 0        | 0.824831 | 0.662467 | 0.996841 | 0        | 0        | 0        | 1.919071 | 1.330334 | 0        |          |   |   |   | -0.17755 | NA       | -0.63954  | NA       | -0.06689 | NA       |    |
| AT2G01818 | AT2G01818 | 54.68958 | 37.46917 | 45.0679  | 56.08852 | 64.25933 | 57.81677 | 69.36567 | 37.76115 | 50.76479 | 64.28889 | 70.5077  | 44.54398 |          |   |   |   | 0.336912 | 0.295351 | 0.182019  | 0.633271 | 0.339635 | 0.524933 |    |
| AT2G01820 | AT2G01820 | 996.3015 | 735.1094 | 664.4296 | 400.0431 | 363.0321 | 498.4204 | 449.9876 | 479.0271 | 415.8808 | 547.8948 | 577.3649 | 579.0717 |          |   |   |   | -0.91211 | 9.69E-08 | -0.81762  | 2.81E-06 | -0.48327 | 0.046502 |    |
| AT2G01830 | AHK4      | 337.6487 | 237.3047 | 251.0926 | 91.55626 | 94.07035 | 104.6683 | 125.3918 | 143.4924 | 78.09968 | 333.9184 | 280.7005 | 270.3716 |          |   |   |   | -1.46822 | 3.99E-12 | -1.21512  | 2.26E-08 | 0.093577 | 0.852822 |    |
| AT2G01840 | AT2G01840 | 0        | 0        | 1.287654 | 0        | 0        | 0        | 5.335821 | 1.07889  | 0        | 1.330334 | 0        | 0        |          |   |   |   | -0.31205 | NA       | 0.645404  | NA       | -0.0304  | NA       |    |
| AT2G01850 | XTH27     | 1426.685 | 1871.674 | 1525.87  | 1338.289 | 1179.192 | 1701.607 | 1606.082 | 1880.505 | 1730.884 | 1570.76  | 1432.77  | 1573.542 |          |   |   |   | -0.19004 | 0.301547 | 0.112509  | 0.588395 | -0.07245 | 0.84885  |    |
| AT2G01860 | EMB975    | 133.1572 | 173.0719 | 135.2037 | 111.3522 | 101.3575 | 138.5609 | 158.296  | 138.0979 | 98.60085 | 161.202  | 184.9164 | 163.6732 |          |   |   |   | -0.32016 | 0.176813 | -0.14389  | 0.610327 | 0.208382 | 0.612836 |    |
| AT2G01870 | AT2G01870 | 22.2235  | 26.75581 | 253.6679 | 220.6423 | 268.9617 | 179.4313 | 151.2749 | 318.2725 | 398.3008 | 409.7217 | 468.2776 | 421.614  |          |   |   |   | -0.15506 | 0.467732 | -0.498991 | 0.007473 | 0.757291 | 0.000184 |    |
| AT2G01880 | PAP7      | 0        | 0        | 0        | 0.412416 | 0.662467 | 0        | 0        | 0        | 0        | 0        | 0        | 0        |          |   |   |   | 0.196313 | NA       | 0         | NA       | 0        | NA       |    |
| AT2G01890 | PAP8      | 34.47821 | 26.76369 | 43.78025 | 40.00431 | 42.39791 | 62.80097 | 52.46891 | 40.99782 | 36.1211  | 38.38143 | 41.24035 | 45.57989 |          |   |   |   | 0.391396 | 0.242812 | 0.26777   | 0.485006 | 0.215876 | 0.739655 |    |
| AT2G01900 | AT2G01900 | 1.188904 | 0        | 1.287654 | 2.062078 | 2.649869 | 3.987363 | 2.66791  | 0        | 0.959536 | 1.330334 | 1.035907 | 0        |          |   |   |   | 0.736392 | 0.278245 | -0.00759  | 0.992995 | 0.071497 | NA       |    |
| AT2G01905 | CYC18     | 20.21137 | 17.84246 | 18.02716 | 4.536571 | 3.312336 | 9.968408 | 10.67164 | 7.55223  | 0.976246 | 17.2164  | 21.28534 | 14.50269 |          |   |   |   | -1.42139 | 0.003412 | -1.23607  | 0.017048 | -0.07098 | NA       |    |
| AT2G01910 | MAP65-6   | 957.0677 | 892.123  | 912.9469 | 692.4457 | 698.903  | 905.1314 | 815.4913 | 889.0053 | 780.9968 | 810.8076 | 838.1104 | 835.9766 |          |   |   |   | -0.26908 | 0.057399 | -0.15175  | 0.347053 | -0.15189 | 0.540577 |    |
| AT2G01913 | AT2G01913 | 22.58917 | 14.27397 | 11.58889 | 18.14629 | 19.21155 | 18.93997 | 16.00746 | 11.86779 | 3.904984 | 19.19071 | 18.62468 | 19.68222 |          |   |   |   | 0.176362 | 0.74007  | -0.52258  | 0.315369 | 0.202355 | 0.836113 |    |
| AT2G01918 | PQL3      | 65.88972 | 48.17464 | 48.93086 | 26.80701 | 39.74804 | 35.88627 | 59.58333 | 55.02339 | 62.47974 | 82.52006 | 151.6581 | 105.6625 |          |   |   |   | -0.65776 | 0.030265 | 0.107198  | 0.078841 | 0.991322 | 0.000264 |    |
| AT2G01920 | AT2G01920 | 0        | 0        | 0        | 0.824831 | 0.662467 | 0.996841 | 0.889303 | 0        | 0        | 0        | 0        | 0        |          |   |   |   | 0.487706 | NA       | 0.166769  | NA       | -0.11313 | 0.505121 |    |
| AT2G01930 | BPC1      | 367.3713 | 360.4177 | 406.8988 | 286.2164 | 327.2588 | 314.0048 | 369.0609 | 320.4303 | 360.2348 | 429.872  | 412.4035 | 438.1885 |          |   |   |   | -0.29383 | 0.033191 | -0.11313  | 0.505121 | 0.171481 | 0.468917 |    |
| AT2G01940 | SGR5      | 149.8019 | 92.78079 | 91.42346 | 47.84021 | 60.94699 | 64.79465 | 61.36194 | 60.41784 | 52.71728 | 93.07496 | 95.78405 | 71.47755 |          |   |   |   | -0.93225 | 0.000175 | -0.90574  | 0.000495 | -0.35876 | 0.406722 |    |
| AT2G01950 | BRL2      | 345.971  | 169.5034 | 151.9432 | 62.27475 | 86.12075 | 87.72199 | 65.80846 | 65.81229 | 76.14719 | 128.5778 | 155.6491 | 151.2424 |          |   |   |   | -1.43353 | 1.51E-07 | -1.59351  | 9.44E-09 | -0.5924  | 0.164235 |    |
| AT2G01960 | TE14      | 0        | 0        | 0        | 0        | 0        | 0.996841 | 1.778607 | 0        | 0        | 1.919071 | 0        | 1.035907 |          |   |   |   | 0.101612 | NA       | 0.282812  | NA       | 0.452419 | NA       |    |
| AT2G01970 | TMN3      | 963.0122 | 797.558  | 758.4284 | 589.7543 |          |          |          |          |          |          |          |          |          |   |   |   |          |          |           |          |          |          |    |

|           |           |          |          |          |          |          |          |          |          |          |          |          |          |          |          |           |          |          |          |
|-----------|-----------|----------|----------|----------|----------|----------|----------|----------|----------|----------|----------|----------|----------|----------|----------|-----------|----------|----------|----------|
| AT2G02450 | ANAC034   | 175.9578 | 192.6986 | 162.2444 | 131.973  | 126.5312 | 127.5956 | 176.0821 | 158.5968 | 136.6744 | 186.1499 | 228.8174 | 155.386  | -0.44217 | 0.023285 | -0.16107  | 0.495334 | 0.099132 | 0.811716 |
| AT2G02470 | AL6       | 257.9922 | 265.8527 | 227.9148 | 279.2053 | 315.9969 | 253.1976 | 263.2338 | 248.1447 | 381.7122 | 249.4793 | 203.5411 | 267.2639 | 0.174069 | 0.453569 | 0.244377  | 0.295016 | -0.05451 | 0.913172 |
| AT2G02480 | STI       | 194.9802 | 144.5239 | 131.3407 | 100.217  | 91.42048 | 144.5419 | 103.1592 | 129.4668 | 98.60085 | 142.9708 | 145.0064 | 177.14   | -0.48907 | 0.043512 | -0.49633  | 0.05188  | -0.02076 | 0.975777 |
| AT2G02490 | AT2G02490 | 0        | 0        | 0        | 0        | 0        | 0        | 0        | 0        | 0        | 0        | 0        | 0        | 0        | NA       | 0         | NA       | 0.171512 | NA       |
| AT2G02498 | AT2G02498 | 0        | 0        | 1.287654 | 0        | 0.662467 | 0        | 0        | 0        | 0        | 0.959536 | 0        | 0        | -0.08303 | 0        | -0.19962  | NA       | -0.19582 | NA       |
| AT2G02500 | ISPD      | 368.5602 | 438.9245 | 436.5148 | 294.8771 | 320.6342 | 283.1028 | 397.5187 | 318.2725 | 335.8286 | 659.201  | 685.122  | 553.1741 | -0.45752 | 0.003141 | -0.23345  | 0.186298 | 0.602244 | 0.000805 |
| AT2G02510 | AT2G02510 | 123.646  | 144.5239 | 167.3951 | 300.2385 | 308.0473 | 202.3587 | 175.1928 | 100.3368 | 385.6172 | 205.3406 | 278.0398 | 168.8528 | 0.769962 | 0.093911 | 0.514893  | 0.311124 | 0.496357 | 0.52727  |
| AT2G02515 | AT2G02515 | 0        | 0        | 0        | 0        | 0        | 0        | 0        | 0        | 0        | 0        | 0        | 0        | #N/A     | #N/A     | #N/A      | #N/A     | #N/A     | #N/A     |
| AT2G02520 | AT2G02520 | 0        | 0        | 0        | 0        | 0        | 0        | 0        | 0        | 0.976246 | 0        | 0        | 0        | 0        | NA       | 0.16673   | NA       | 0        | NA       |
| AT2G02540 | ZHD3      | 26.15589 | 16.05821 | 23.17778 | 24.74493 | 23.84882 | 31.8989  | 28.45771 | 16.18335 | 18.54867 | 27.82653 | 25.27635 | 20.71813 | 0.230133 | 0.592225 | -0.05937  | 0.910747 | 0.132721 | 0.879034 |
| AT2G02550 | AT2G02550 | 0        | 0        | 0        | 0        | 0        | 0        | 0        | 0        | 0        | 0        | 0        | 0        | #N/A     | #N/A     | #N/A      | #N/A     | #N/A     | #N/A     |
| AT2G02560 | CAND1     | 720.4758 | 599.5067 | 545.9654 | 403.3424 | 441.2032 | 468.5152 | 452.6555 | 544.8394 | 297.755  | 523.9065 | 541.4459 | 483.7683 | -0.49593 | 0.016943 | -0.51403  | 0.016114 | -0.26249 | 0.463036 |
| AT2G02570 | AT2G02570 | 707.3978 | 799.3422 | 635.6877 | 1012.068 | 1128.844 | 1073.598 | 1178.327 | 1055.154 | 1170.519 | 985.4431 | 975.1348 | 823.5457 | 0.452178 | 0.000312 | 0.535166  | 1.94E-05 | 0.247117 | 0.214249 |
| AT2G02580 | CYP71B9   | 0        | 0        | 1.287654 | 3.299325 | 1.324935 | 0.996841 | 1.778607 | 3.23667  | 1.952492 | 0        | 0        | 0        | 0.696648 | 0.292848 | 0.763445  | 0.259485 | -0.29936 | NA       |
| AT2G02590 | AT2G02590 | 55.87849 | 67.80135 | 64.38272 | 45.77813 | 62.93439 | 53.8294  | 53.35821 | 58.26006 | 53.69353 | 71.96517 | 47.89202 | 63.1903  | -0.20394 | 0.493369 | -0.1711   | 0.605496 | -0.01485 | 0.984708 |
| AT2G02600 | AT2G02600 | 0        | 0        | 0        | 0        | 0        | 0        | 0        | 0        | 0        | 0        | 0        | 0        | #N/A     | #N/A     | #N/A      | #N/A     | #N/A     | #N/A     |
| AT2G02610 | AT2G02610 | 0        | 0        | 0        | 0        | 0.662467 | 0        | 0.889303 | 1.07889  | 0.976246 | 0        | 0        | 0        | 0.104727 | NA       | 0.538625  | NA       | 0        | NA       |
| AT2G02620 | AT2G02620 | 1.188904 | 0        | 0        | 0        | 0        | 0        | 0.889303 | 1.07889  | 0        | 0        | 1.330334 | 0        | -0.29581 | NA       | 0.12448   | NA       | -0.0131  | NA       |
| AT2G02630 | AT2G02630 | 0        | 0        | 0        | 0        | 0        | 0        | 0        | 3.23667  | 0        | 0        | 0        | 1.035907 | 0        | NA       | 0.41704   | NA       | 0.145429 | NA       |
| AT2G02640 | AT2G02640 | 0        | 0        | 0        | 0        | 0        | 0        | 0        | 0        | 0        | 0        | 2.660668 | 2.071813 | 0        | NA       | 0         | NA       | 0.691027 | NA       |
| AT2G02650 | AT2G02650 | 0        | 0        | 0        | 0        | 0        | 0        | 0        | 0        | 0        | 0        | 0        | 0        | #N/A     | #N/A     | #N/A      | #N/A     | #N/A     | #N/A     |
| AT2G02660 | AT2G02660 | 0        | 0        | 0        | 0        | 0        | 0        | 0        | 0        | 0.959536 | 0        | 0        | 0        | 0        | NA       | 0         | NA       | 0.171512 | NA       |
| AT2G02670 | AT2G02670 | 0        | 0        | 0        | 0        | 0        | 0        | 0        | 0        | 0        | 0        | 0        | 0        | #N/A     | #N/A     | #N/A      | #N/A     | #N/A     | #N/A     |
| AT2G02680 | AT2G02680 | 0        | 1.784246 | 0        | 0.412416 | 1.324935 | 0.996841 | 0.889303 | 0        | 0        | 0.959536 | 0        | 0        | 0.222551 | NA       | -0.11404  | NA       | -0.08918 | NA       |
| AT2G02690 | AT2G02690 | 1.188904 | 0        | 0        | 0        | 0        | 0        | 0        | 0.959536 | 0        | 0        | 0        | 0        | -0.21179 | NA       | -0.19779  | NA       | -0.02864 | NA       |
| AT2G02700 | AT2G02700 | 0        | 0        | 1.287654 | 0.412416 | 0.662467 | 0.996841 | 0.889303 | 0        | 0        | 0        | 0        | 1.035907 | 0.132939 | NA       | -0.08252  | NA       | -0.05264 | NA       |
| AT2G02710 | TLP1      | 691.9421 | 817.1847 | 739.1136 | 803.798  | 836.0337 | 874.2294 | 1100.068 | 1029.261 | 830.7853 | 715.8136 | 931.2338 | 844.2638 | 0.159891 | 0.35716  | 0.393289  | 0.01354  | 0.146119 | 0.612957 |
| AT2G02720 | AT2G02720 | 1.188904 | 3.568492 | 0        | 3.299325 | 2.648699 | 0        | 5.35821  | 3.23667  | 0.976246 | 0        | 2.660668 | 2.071813 | 0.215309 | 0.787521 | 0.50833   | 0.503396 | 0.003488 | NA       |
| AT2G02730 | AT2G02730 | 49.9397  | 71.36984 | 70.82099 | 134.0351 | 119.9066 | 121.6146 | 104.0485 | 100.3368 | 145.4607 | 76.76285 | 86.47171 | 80.80071 | 0.949035 | 2.29E-05 | 0.844775  | 0.000315 | 0.337458 | 0.416122 |
| AT2G02740 | WHY3      | 139.1018 | 160.5821 | 124.9025 | 193.0105 | 180.1911 | 161.4882 | 185.8644 | 170.4646 | 162.0568 | 137.2136 | 118.3997 | 132.596  | 0.345122 | 0.059465 | 0.293235  | 0.142773 | -0.11142 | 0.776218 |
| AT2G02741 | MIR840A   | 0        | 0        | 0        | 0        | 0        | 0        | 0        | 0        | 0        | 0        | 0        | 0        | #N/A     | #N/A     | #N/A      | #N/A     | #N/A     | #N/A     |
| AT2G02750 | PCMP-E22  | 26.15589 | 23.1952  | 19.31482 | 28.45667 | 19.21155 | 21.9305  | 26.6791  | 28.05114 | 29.28738 | 21.10978 | 19.95501 | 22.78994 | 0.038156 | 0.937071 | 0.264803  | 0.545698 | -0.09409 | 0.917424 |
| AT2G02760 | UBC2      | 1278.072 | 1391.712 | 1416.42  | 1650.075 | 1875.445 | 1679.677 | 1959.136 | 1737.013 | 1796.293 | 1617.777 | 1956.921 | 1302.135 | 0.344034 | 0.031031 | 0.420568  | 0.008513 | 0.250253 | 0.318972 |
| AT2G02770 | AT2G02770 | 197.3581 | 181.9931 | 181.5593 | 164.5538 | 200.7276 | 164.4787 | 214.3221 | 146.729  | 148.3894 | 213.0169 | 274.0488 | 226.8635 | -0.08203 | 0.746505 | -0.13282  | 0.60595  | 0.32886  | 0.299712 |
| AT2G02780 | AT2G02780 | 231.8363 | 223.0308 | 251.0926 | 127.4364 | 131.1685 | 182.4219 | 120.056  | 124.0723 | 82.98091 | 264.8318 | 288.6825 | 237.2226 | -0.67721 | 0.000675 | -1.07948  | 7.14E-08 | 0.15628  | 0.694775 |
| AT2G02790 | IQD29     | 221.1361 | 165.9349 | 202.1617 | 125.3743 | 143.0929 | 157.5008 | 120.056  | 158.5968 | 139.6032 | 195.7453 | 220.8354 | 197.8581 | -0.47902 | 0.009896 | -0.49676  | 0.101726 | 0.046828 | 0.919089 |
| AT2G02795 | AT2G02795 | 0        | 0        | 0        | 0        | 0        | 0        | 0        | 0.976246 | 0        | 0        | 0        | 0        | 0        | NA       | 0.16673   | NA       | -0.34748 | 0.143966 |
| AT2G02800 | APK2B     | 286.5259 | 310.4588 | 244.6543 | 483.3511 | 411.3922 | 448.5784 | 289.9129 | 343.087  | 339.7336 | 231.2481 | 220.8354 | 204.0736 | 0.672261 | 4.57E-06 | 0.209054  | 0.243257 | -0.19549 | 0.585023 |
| AT2G02810 | UTR1      | 92.73451 | 98.13353 | 95.28642 | 741.5232 | 665.1171 | 719.719  | 435.7587 | 411.0571 | 368.0447 | 87.31774 | 82.48071 | 78.7289  | 2.848761 | 1.79E-80 | 0.2048346 | 3.01E-40 | -0.10248 | 0.852822 |
| AT2G02820 | MYB88     | 177.1467 | 114.1917 | 115.8889 | 55.26369 | 43.72284 | 71.77254 | 72.92289 | 62.57562 | 57.59851 | 122.8206 | 119.7301 | 137.7756 | -1.23113 | 1.53E-07 | -1.039    | 2.16E-05 | -0.10248 | 0.852822 |
| AT2G02830 | AT2G02830 | 0        | 0        | 0        | 0        | 0        | 0        | 0        | 0        | 0        | 0.959536 | 0        | 0        | 0        | NA       | 0         | NA       | 0.171512 | NA       |
| AT2G02835 | AT2G02835 | 0        | 0        | 0        | 0        | 0        | 0        | 0        | 0        | 0        | 0        | 0        | 1.035907 | 0        | NA       | 0         | NA       | 0.172362 | NA       |
| AT2G02840 | AT2G02840 | 1.188904 | 0        | 0        | 0        | 0        | 0        | 0        | 0        | 0        | 0.959536 | 0        | 0        | -0.21179 | NA       | -0.19779  | NA       | -0.02864 | NA       |
| AT2G02850 | ARNP      | 28.53369 | 19.62671 | 20.60247 | 35.46774 | 27.16116 | 20.93366 | 20.45398 | 19.42002 | 28.31113 | 31.66468 | 21.28534 | 34.18492 | 0.272404 | 0.518645 | -0.0285   | 0.957816 | 0.307259 | 0.667821 |
| AT2G02860 | SUC13     | 177.1467 | 205.1883 | 185.4222 | 221.4672 | 172.904  | 213.3239 | 203.6505 | 219.0147 | 136.6744 | 193.8262 | 200.8804 | 164.7091 | 0.100607 | 0.69325  | -0.01767  | 0.952973 | -0.01837 | 0.975777 |
| AT2G02870 | SKIP11    | 280.5813 | 237.3047 | 245.942  | 247.0369 | 270.2866 | 303.0396 | 277.4627 | 284.8269 | 299.9213 | 191.9071 | 139.6851 | 198.8941 | 0.090183 | 0.663458 | 0.15234   | 0.412502 | -0.5102  | 0.026076 |
| AT2G02880 | AT2G02880 | 95.11232 | 64.23286 | 96.57408 | 118.7757 | 130.5061 | 110.6493 | 129.8383 | 104.6523 | 144.4844 | 116.1038 | 109.0874 | 75.62118 | 0.458869 | 0.060124 | 0.529907  | 0.035041 | 0.203996 | 0.662913 |
| AT2G02890 | AT2G02890 | 0        | 0        | 0        | 0.412416 | 0        | 1.993682 | 0.889303 | 1.07889  | 0        | 0        | 0        | 0        | 0.396595 | NA       | 0.337054  | NA       | 0        | NA       |
| AT2G02900 | AT2G02900 | 0        | 0        | 0        | 0        | 0        | 0        | 0        | 0        | 0        | 0        | 0        | 0        | #N/A     | #N/A     | #N/A      | #N/A     | #N/A     | #N/A     |
| AT2G02910 | AT2G02910 | 148.613  | 142.7397 | 176.4086 | 145.9951 | 167.6042 | 148.5293 | 155.6281 | 161.8335 | 125.9357 | 170.7973 | 159.6401 | 147.0987 | -0.02251 | 0.928265 | -0.081    | 0.743841 | 0.002524 | 0.960085 |
| AT2G02930 | G5TF3     | 124.8349 | 132.0342 | 132.6284 | 280.2164 | 280.8861 | 288.087  | 480.2239 | 462.8438 | 383.6647 | 64.28889 | 42.57069 | 78.7289  | 1.111889 | 1.28E-10 | 1.735024  | 7.07E-25 | -0.00578 | 1.83E-05 |
| AT2G02950 | PKS1      | 280.5813 | 303.3218 | 316.763  | 280.0302 | 294.1355 | 306.0301 | 330.8209 | 358.1915 | 380.7359 | 308.0109 | 300.6555 | 271.4075 | -0.03558 | 0.845057 | 0.245876  | 1.008959 | -0.03188 | 0.92935  |
| AT2G02955 | MEE12     | 45.17835 | 42.8219  | 43.78025 | 43.30364 | 40.4105  | 47.84836 | 40.90796 | 42.07671 | 52.71728 | 29.7456  | 45.23135 | 46.61159 | -0.01219 | 0.974908 | 0.037398  | 0.927468 | -0.12381 | 0.852822 |
| AT2G02960 | AT2G02960 | 293.6593 | 396.1026 | 352.8173 | 546.4506 | 465.7145 | 535.3035 | 414.4154 | 375.4537 | 285.0638 | 271.5486 | 311.2981 | 304.5565 | 0.564441 | 0.001331 | 0.049339  | 0.844996 | -0.22355 | 0.488261 |
| AT2G02970 | APHY6     | 285.3369 | 322.9485 | 314.1877 | 297.3516 | 284.1985 | 337.929  | 300.5846 | 342.0081 | 257.4289 | 284.9821 | 228.8174 | 278.6589 | -0.00588 | 0.979269 | -0.0329   | 0.888839 | -0.20745 | 0.481893 |
| AT2G02980 | PCMP-H2   | 76.08985 | 74.93833 | 64.38272 | 54.02644 | 52.33491 | 50.83888 | 62.25124 | 72.28563 | 63.45599 | 73.38424 | 101.1054 | 87.01615 | -0.43191 | 0.075221 | -0.11802  | 0.701816 | 0.265898 | 0.522993 |
| AT2G02990 | RNS1      | 4.755616 | 10.70548 | 6.438272 | 23.09527 | 25.83622 | 23.92418 | 30.23632 | 34.52448 | 45.88356 | 6.835821 | 38.57969 |          |          |          |           |          |          |          |







|           |           |          |          |          |          |          |          |          |          |          |          |          |          |          |          |          |           |          |          |
|-----------|-----------|----------|----------|----------|----------|----------|----------|----------|----------|----------|----------|----------|----------|----------|----------|----------|-----------|----------|----------|
| ATZG05040 | ATZG05040 | 0        | 0        | 0        | 0.412416 | 0.662467 | 0.996841 | 2.66791  | 0        | 0.976246 | 0        | 0        | 2.071813 | 0.312632 | NA       | 0.586702 | NA        | 0.338576 | NA       |
| ATZG05050 | ATZG05050 | 0        | 0        | 0        | 1.237247 | 0        | 4.984204 | 1.778607 | 3.236667 | 2.928738 | 0        | 0        | 0        | 0.824112 | 0.180964 | 1.026463 | 0.0095712 | 0        | NA       |
| ATZG05060 | ATZG05060 | 0        | 0        | 0        | 0        | 0        | 0.996841 | 0        | 0        | 0        | 0        | 0        | 1.035907 | 0.134822 | NA       | 0        | NA        | 0.152581 | NA       |
| ATZG05070 | LHC2.2    | 18618.24 | 22137.14 | 18831.94 | 8381.522 | 8080.113 | 7397.555 | 3552.767 | 3955.211 | 4732.841 | 14712.56 | 14090.9  | 15209.18 | -1.30453 | 6.93E-26 | -2.25598 | 8.43E-76  | -0.43177 | 0.010989 |
| ATZG05080 | ATZG05080 | 0        | 0        | 0        | 0.412416 | 0.662467 | 0        | 0.889303 | 1.07889  | 0        | 0.959536 | 1.330334 | 1.035907 | 0.183232 | NA       | 0.361188 | NA        | 0.586195 | NA       |
| ATZG05082 | ATZG05082 | 0        | 0        | 0        | 0        | 0        | 0        | 0        | 0        | 0        | 0        | 0        | 0        | #N/A     | #N/A     | #N/A     | #N/A      | #N/A     | #N/A     |
| ATZG05084 | ATZG05084 | 0        | 0        | 0        | 0        | 0.662467 | 0        | 0        | 0        | 0        | 0        | 1.330334 | 0        | 0.101524 | NA       | 0        | NA        | 0.179327 | NA       |
| ATZG05087 | ATZG05087 | 1.188904 | 0        | 0        | 0        | 0        | 0        | 0        | 0        | 0        | 0        | 0        | 0        | -0.2184  | NA       | -0.20558 | NA        | -0.19918 | NA       |
| ATZG05090 | ATZG05090 | 0        | 1.784246 | 0        | 0        | 0        | 0        | 0.889303 | 0        | 0.976246 | 0        | 0        | 0        | -0.31542 | NA       | 0.08696  | NA        | -0.27406 | NA       |
| ATZG05100 | LHC2.1    | 20602.52 | 23921.39 | 20887.04 | 10160.68 | 8690.908 | 7913.919 | 4021.43  | 4077.125 | 5028.643 | 19318.33 | 16851.34 | 16894.6  | -1.27124 | 1.67E-21 | -2.28504 | 7.87E-68  | -0.29757 | 0.169041 |
| ATZG05110 | ATZG05110 | 0        | 0        | 0        | 0        | 0        | 0        | 0.889303 | 0        | 0        | 0        | 0        | 0        | 0        | NA       | 0.160764 | NA        | 0        | NA       |
| ATZG05115 | ATZG05115 | 0        | 0        | 0        | 0        | 0        | 0        | 0        | 0        | 0        | 0        | 0        | 0        | #N/A     | #N/A     | #N/A     | #N/A      | #N/A     | #N/A     |
| ATZG05117 | SCR19     | 0        | 0        | 0        | 0        | 0        | 0        | 0.889303 | 0        | 0        | 0        | 0        | 0        | 0        | NA       | 0.160764 | NA        | 0        | NA       |
| ATZG05120 | NUP133    | 153.3686 | 105.2705 | 123.6148 | 108.0529 | 117.2567 | 138.5609 | 125.3918 | 125.1512 | 101.5296 | 112.2657 | 101.1054 | 114.9856 | -0.09529 | 0.709132 | -0.12875 | 0.630955  | -0.22259 | 0.565684 |
| ATZG05130 | ATZG05130 | 1.188904 | 0        | 0        | 0        | 0        | 0        | 0        | 0        | 0        | 0        | 0        | 0        | -0.21339 | NA       | -0.19896 | NA        | -0.02174 | NA       |
| ATZG05133 | ATZG05133 | 0        | 0        | 0        | 2.062078 | 1.987402 | 3.987363 | 2.66791  | 1.07889  | 0        | 0.959536 | 0        | 1.035907 | 1.116913 | 0.068869 | 0.58541  | 0.392981  | 0.319247 | NA       |
| ATZG05140 | ATZG05140 | 11.88904 | 5.352738 | 10.30123 | 8.248311 | 4.637271 | 10.96525 | 5.335821 | 6.47334  | 8.786214 | 8.635821 | 2.660668 | 6.215439 | -0.20839 | 0.75204  | -0.35511 | 0.597311  | -0.4883  | NA       |
| ATZG05150 | ATZG05150 | 0        | 0        | 0        | 0        | 0        | 0        | 0.889303 | 2.15778  | 0.976246 | 0.959536 | 0        | 1.035907 | 0        | NA       | 0.709965 | NA        | 0.387883 | NA       |
| ATZG05160 | ATZG05160 | 95.11232 | 99.91778 | 103.0123 | 90.73143 | 86.78321 | 98.68724 | 156.5174 | 143.4924 | 98.60085 | 115.1443 | 146.3367 | 113.9497 | -0.1115  | 0.687592 | 0.408041 | 0.094131  | 0.31563  | 0.407847 |
| ATZG05170 | VPS11     | 565.9183 | 463.904  | 433.9395 | 284.5667 | 282.2111 | 332.9448 | 368.1716 | 388.4004 | 348.5198 | 441.3864 | 476.2596 | 446.4757 | -0.70152 | 5.98E-07 | -0.4033  | 0.080034  | -0.10451 | 0.725981 |
| ATZG05171 | ATZG05171 | 0        | 0        | 0        | 0        | 0        | 0        | 0.996841 | 0        | 0        | 0        | 0        | 0        | 0.15625  | NA       | 0        | NA        | 0        | NA       |
| ATZG05180 | CYP705A6  | 2.377808 | 0        | 0        | 0        | 0.662467 | 0        | 0        | 1.07889  | 0.976246 | 0.959536 | 2.660668 | 2.071813 | -0.42368 | 0.518019 | -0.1013  | 0.896266  | 0.410274 | NA       |
| ATZG05185 | ATZG05185 | 27.34479 | 26.76369 | 20.60247 | 33.81808 | 38.4231  | 13.95577 | 27.56841 | 16.18335 | 40.02609 | 31.66468 | 47.89202 | 37.29264 | 0.212245 | 0.663272 | 0.151059 | 0.782905  | 0.566552 | 0.398983 |
| ATZG05190 | ATZG05190 | 0        | 0        | 0        | 0        | 0        | 0        | 0        | 0        | 0        | 0        | 0        | 0        | #N/A     | #N/A     | #N/A     | #N/A      | #N/A     | #N/A     |
| ATZG05200 | ATZG05200 | 0        | 0        | 0        | 0        | 0        | 0        | 0.889303 | 2.15778  | 0.976246 | 0.959536 | 0        | 1.035907 | 0        | NA       | 0.709965 | NA        | 0.387883 | NA       |
| ATZG05210 | POT1A     | 254.4254 | 212.3253 | 235.6407 | 194.6602 | 178.2037 | 202.3587 | 192.9789 | 201.7524 | 147.4131 | 292.6584 | 224.8264 | 282.8025 | -0.28931 | 0.129226 | -0.3715  | 0.058366  | 0.184486 | 0.57837  |
| ATZG05220 | RPS17B    | 1068.825 | 1045.568 | 1094.506 | 1135.792 | 1185.154 | 934.0398 | 867.9602 | 783.2741 | 1128.54  | 1118.819 | 1066.928 | 1105.312 | 0.021746 | 0.919478 | 0.20374  | 0.261387  | 0.03586  | 0.927935 |
| ATZG05230 | ATZG05230 | 256.8033 | 173.0719 | 202.1617 | 167.8531 | 155.0173 | 184.4155 | 172.5249 | 202.8313 | 145.4607 | 159.2829 | 171.6131 | 165.745  | -0.32372 | 0.11152  | -0.28459 | 0.196516  | -0.35088 | 0.255161 |
| ATZG05240 | ATZG05240 | 11.88904 | 14.27397 | 14.1642  | 7.835896 | 5.299738 | 9.710009 | 9.782338 | 6.833722 | 21.10978 | 23.94601 | 11.39497 | 0        | -0.65067 | 0.192874 | -0.50149 | 0.370993  | 0.42481  | NA       |
| ATZG05250 | ATZG05250 | 231.8363 | 190.9143 | 178.984  | 185.1746 | 151.0425 | 205.3492 | 197.4254 | 210.3835 | 148.3894 | 181.3522 | 168.9524 | 159.5296 | -0.15599 | 0.500786 | -0.11498 | 0.656036  | -0.23556 | 0.514832 |
| ATZG05260 | ATZG05260 | 49.93397 | 39.25341 | 43.78025 | 82.89553 | 82.14594 | 71.77254 | 48.02239 | 86.3112  | 91.76712 | 68.12703 | 42.57069 | 42.47217 | 0.777142 | 0.009661 | 0.701155 | 0.027689  | 0.188283 | 0.773406 |
| ATZG05270 | ATZG05270 | 1.188904 | 0        | 0        | 0        | 0        | 0        | 0.889303 | 0        | 0        | 0        | 0        | 0        | -0.2447  | NA       | -0.0484  | NA        | -0.02732 | NA       |
| ATZG05280 | ATZG05280 | 2.377808 | 0        | 2.575309 | 0.412416 | 0        | 1.993682 | 0        | 3.23667  | 0.976246 | 0.959536 | 1.330334 | 2.071813 | -0.47002 | 0.506791 | -0.1378  | 0.870469  | -0.09987 | NA       |
| ATZG05290 | ATZG05290 | 0        | 0        | 1.287654 | 0        | 0        | 0        | 0        | 1.07889  | 1.952492 | 0.959536 | 0        | 1.035907 | -0.34558 | NA       | -0.27725 | NA        | 0.126797 | NA       |
| ATZG05294 | ATZG05294 | 0        | 0        | 0        | 0        | 0        | 0        | 0        | 0        | 0        | 0        | 0        | 0        | #N/A     | #N/A     | #N/A     | #N/A      | #N/A     | #N/A     |
| ATZG05300 | ATZG05300 | 29.7226  | 28.54794 | 33.47901 | 22.27044 | 25.17376 | 23.92418 | 22.23259 | 19.42002 | 29.28738 | 37.42189 | 46.56169 | 40.40035 | -0.35121 | 0.324039 | -0.34533 | 0.380574  | 0.400816 | 0.469967 |
| ATZG05310 | ATZG05310 | 997.4904 | 1125.859 | 1104.807 | 820.707  | 1029.474 | 708.7538 | 931.1007 | 744.4341 | 1068.989 | 1516.066 | 2091.285 | 1402.617 | -0.32467 | 0.132525 | -0.2269  | 0.341336  | 0.616991 | 0.016449 |
| ATZG05320 | ATZG05320 | 141.4796 | 137.3869 | 141.642  | 196.3098 | 177.5412 | 220.3018 | 136.9527 | 135.9401 | 130.817  | 99.79171 | 82.48071 | 95.3034  | 0.483316 | 0.005239 | -0.05904 | 0.813486  | -0.57799 | 0.017934 |
| ATZG05330 | ATZG05330 | 0        | 0        | 5.150617 | 10.31039 | 13.91181 | 5.981045 | 8.893035 | 9.710009 | 11.71495 | 0        | 0        | 0        | 1.628963 | 0.005927 | 1.618154 | 0.009825  | -0.81374 | NA       |
| ATZG05335 | SCR15     | 0        | 0        | 0        | 0        | 0        | 0        | 0        | 0        | 0        | 0        | 0        | 0        | #N/A     | #N/A     | #N/A     | #N/A      | #N/A     | #N/A     |
| ATZG05340 | ATZG05340 | 0        | 0        | 0        | 0.412416 | 0        | 0        | 0.889303 | 1.07889  | 0.976246 | 0        | 0        | 0        | 0.067489 | NA       | 0.550563 | NA        | 0        | NA       |
| ATZG05350 | ATZG05350 | 0        | 1.784246 | 1.287654 | 0        | 0        | 0.996841 | 1.778607 | 0        | 0        | 0        | 1.330334 | 1.035907 | -0.36384 | NA       | -0.14186 | NA        | -0.0784  | NA       |
| ATZG05360 | ATZG05360 | 0        | 0        | 0        | 0        | 0        | 0        | 0        | 0        | 0.976246 | 0        | 0        | 0        | 0.16724  | NA       | 0.14724  | NA        | 0.156349 | NA       |
| ATZG05370 | ATZG05370 | 1.188904 | 1.784246 | 0        | 2.474493 | 0.662467 | 1.993682 | 3.557214 | 2.15778  | 1.952492 | 0        | 1.330334 | 0        | 0.344856 | 0.644704 | 0.623088 | 0.39101   | -0.29709 | NA       |
| ATZG05380 | GRP35     | 361.4268 | 528.1368 | 472.5691 | 3437.484 | 3391.17  | 3536.791 | 2367.326 | 2794.325 | 5035.477 | 323.3635 | 450.9832 | 322.1669 | 2.802234 | 3.93E-33 | 2.779436 | 1.1E-32   | -0.2982  | 0.521998 |
| ATZG05390 | ATZG05390 | 0        | 0        | 0        | 0        | 0        | 0        | 0.889303 | 2.15778  | 0.976246 | 0        | 0        | 0        | 0.645903 | NA       | 0.645903 | NA        | 0.400856 | NA       |
| ATZG05400 | ATZG05400 | 0        | 0        | 0        | 0        | 0        | 0        | 0        | 0        | 0        | 0        | 0        | 0        | #N/A     | #N/A     | #N/A     | #N/A      | #N/A     | #N/A     |
| ATZG05410 | ATZG05410 | 0        | 0        | 0        | 0        | 0        | 0        | 0        | 0        | 0        | 0        | 1.330334 | 0        | 0        | NA       | 0        | NA        | 0.172362 | NA       |
| ATZG05420 | ATZG05420 | 0        | 0        | 0        | 0        | 0        | 0        | 0.889303 | 0        | 0        | 0        | 0        | 0        | 0        | NA       | 0.160764 | NA        | 0        | NA       |
| ATZG05430 | ATZG05430 | 0        | 0        | 0        | 0        | 0        | 0        | 0.889303 | 0        | 0        | 0        | 0        | 0        | 0        | NA       | 0.160764 | NA        | 0        | NA       |
| ATZG05435 | ATZG05435 | 0        | 0        | 0        | 0        | 0        | 0        | 1.07889  | 0        | 0        | 0        | 0        | 0        | 0        | NA       | 0.16673  | NA        | 0        | NA       |
| ATZG05440 | ATGRP9    | 20.21137 | 21.41095 | 27.04074 | 46.19054 | 40.4105  | 50.83888 | 22.23259 | 46.39227 | 53.69353 | 28.78607 | 43.90102 | 35.22082 | 0.90057  | 0.011475 | 0.738028 | 0.056011  | 0.56671  | 0.339925 |
| ATZG05441 | ATZG05441 | 0        | 0        | 0        | 0        | 0        | 0        | 0        | 0        | 0        | 0        | 0        | 0        | #N/A     | #N/A     | #N/A     | #N/A      | #N/A     | #N/A     |
| ATZG05450 | ATZG05450 | 0        | 0        | 0        | 0        | 0.662467 | 0        | 0.889303 | 0        | 0.976246 | 0        | 1.330334 | 0        | 0.093364 | NA       | 0.326415 | NA        | 0.201586 | NA       |
| ATZG05460 | ATZG05460 | 0        | 0        | 0        | 0.662467 | 0        | 0        | 0        | 0        | 0        | 0        | 0        | 0        | 0.128567 | NA       | 0        | NA        | 0        | NA       |
| ATZG05470 | ATZG05470 | 0        | 1.784246 | 0        | 0        | 0        | 0        | 0        | 0        | 0        | 0        | 0        | 0        | -0.2184  | NA       | -0.20558 | NA        | -0.19918 | NA       |
| ATZG05475 | ATZG05475 | 0        | 0        | 0        | 0        | 0        | 0        | 0        | 0        | 0        | 0        | 0        | 1.035907 | 0        | NA       | 0        | NA        | 0.172362 | NA       |
| ATZG05480 | ATZG05480 | 0        | 0        | 0        | 0        | 0        | 0        | 0        | 0        | 0        | 0        | 0        | 0        | #N/A     | #N/A     | #N/A     | #N/A      | #N/A     | #N/A     |
| ATZG05490 | ATZG05490 | 2.377808 | 0        | 0        | 0.412416 | 0        | 0        | 0        | 1.07889  | 0        | 0.959536 | 0        | 0        | -0.33182 | NA       | -0.21396 | NA        | -0.21438 | NA       |
| ATZG05500 | ATZG05500 | 0        | 0        | 0        | 0        | 0        | 0        | 0        | 0        | 0        | 0        | 0        | 0        | #N/A     | #N/A     | #N/A     | #N/A      | #N/A     | #N/A     |
| ATZG05510 | ATZG05510 | 1.188904 | 0        | 0        | 2.886909 | 0.662467 | 10.96525 | 0.889303 | 0        | 0.976246 | 0        | 0        | 0        | 1.310333 | 0.029484 | 0.056298 | 0.944582  | -0.26527 | NA       |
| ATZG05518 | ATZG05518 | 40.42273 | 48.17464 | 51.50617 | 54.85127 | 78.83361 | 38.87679 | 73.81219 | 67.97007 | 72.2422  | 28.78607 | 41.24035 | 26.93357 | 0.302136 | 0.368657 | 0.583013 | 0.070417  | -0.50434 |          |

|           |           |          |          |          |          |          |          |          |          |          |          |          |          |          |          |          |          |          |          |
|-----------|-----------|----------|----------|----------|----------|----------|----------|----------|----------|----------|----------|----------|----------|----------|----------|----------|----------|----------|----------|
| ATZG05803 | ATZG05803 | 0        | 0        | 0        | 0        | 0.662467 | 0        | 0        | 0        | 0        | 0        | 0        | 0.128567 | NA       | 0        | NA       | 0        | NA       |          |
| ATZG05810 | ATZG05810 | 19.02246 | 3.568492 | 5.150617 | 4.124156 | 5.299738 | 4.984204 | 4.446517 | 2.15778  | 6.833722 | 7.676285 | 13.30334 | 10.35907 | -0.76044 | 0.202909 | -0.78692 | 0.217389 | 0.084102 | NA       |
| ATZG05812 | ATZG05812 | 0        | 0        | 0        | 0        | 0        | 0        | 0        | 0        | 0        | 0        | 0        | 0        | #N/A     | #N/A     | #N/A     | #N/A     | #N/A     | #N/A     |
| ATZG05820 | ATZG05820 | 1.188904 | 0        | 0        | 0        | 0        | 0        | 0        | 0        | 0.976246 | 0        | 0        | 0        | -0.21061 | NA       | -0.03092 | NA       | -0.19245 | NA       |
| ATZG05830 | ATZG05830 | 570.6739 | 711.9142 | 737.8259 | 685.4347 | 682.3413 | 621.0318 | 727.4502 | 628.9928 | 664.8235 | 791.6169 | 875.3598 | 668.1597 | -0.01869 | 0.929351 | 0.003461 | 0.987478 | 0.206295 | 0.431857 |
| ATZG05840 | PAAZ      | 787.0544 | 951.0031 | 958.0148 | 1538.723 | 1644.906 | 1431.463 | 1317.058 | 1263.38  | 1366.744 | 1032.46  | 1173.355 | 899.1669 | 0.768255 | 5.38E-09 | 0.544824 | 7.36E-05 | 0.201178 | 0.395958 |
| ATZG05845 | ATZG05845 | 0        | 0        | 0        | 0.412416 | 0        | 0        | 0        | 0        | 0        | 0        | 0        | 1.035907 | 0.065109 | NA       | 0        | NA       | 0.150531 | NA       |
| ATZG05850 | SCPL38    | 1.188904 | 0        | 0        | 0        | 0        | 0        | 0        | 0        | 0        | 0        | 0        | 1.035907 | -0.21339 | NA       | -0.19896 | NA       | -0.02174 | NA       |
| ATZG05860 | ATZG05860 | 0        | 0        | 0        | 0        | 0        | 0        | 0        | 0        | 0        | 0        | 0        | 0        | #N/A     | #N/A     | #N/A     | #N/A     | #N/A     | #N/A     |
| ATZG05870 | ATZG05870 | 0        | 0        | 0        | 0        | 0        | 0        | 0        | 0        | 0        | 0        | 0        | 1.035907 | 0        | NA       | 0        | NA       | 0.172362 | NA       |
| ATZG05880 | ATZG05880 | 0        | 0        | 0        | 0.412416 | 0        | 0        | 0        | 0        | 0        | 0        | 0        | 0        | 0.095918 | NA       | 0        | NA       | 0        | NA       |
| ATZG05890 | ATZG05890 | 0        | 0        | 0        | 0.412416 | 0        | 0.996841 | 0.889303 | 0        | 0        | 0        | 0        | 0        | 0.244532 | NA       | 0.15748  | NA       | 0        | NA       |
| ATZG05900 | SUVH10    | 0        | 0        | 0        | 0        | 0        | 0        | 0        | 0        | 0        | 0        | 0        | 0        | #N/A     | #N/A     | #N/A     | #N/A     | #N/A     | #N/A     |
| ATZG05910 | ATZG05910 | 0        | 1.784246 | 2.575309 | 14.02213 | 13.91181 | 9.968408 | 16.89677 | 7.55223  | 13.66744 | 0.959536 | 1.330334 | 2.071813 | 2.018476 | 0.000276 | 1.994843 | 0.000459 | -0.06044 | NA       |
| ATZG05914 | ATZG05914 | 2.377808 | 3.568492 | 1.287654 | 0        | 0        | 0        | 2.66791  | 2.15778  | 3.904984 | 3.838143 | 0        | 2.071813 | -1.26032 | 0.048234 | 0.218735 | 0.79775  | -0.0626  | NA       |
| ATZG05915 | ATZG05915 | 0        | 0        | 0        | 0        | 0        | 0        | 0        | 0        | 0        | 0        | 0        | 0        | #N/A     | #N/A     | #N/A     | #N/A     | #N/A     | #N/A     |
| ATZG05920 | ATZG05920 | 1034.346 | 706.5614 | 714.6482 | 556.3486 | 555.1476 | 590.1297 | 522.9104 | 555.6283 | 622.8449 | 622.7386 | 653.194  | 644.3339 | -0.52426 | 0.001187 | -0.52364 | 0.001569 | -0.35225 | 0.146582 |
| ATZG05930 | ATZG05930 | 2.377808 | 5.352738 | 1.287654 | 0.824831 | 0        | 0.996841 | 0.889303 | 1.07889  | 0.976246 | 1.919071 | 1.330334 | 3.10772  | -0.96309 | 0.148769 | -0.6875  | 0.345626 | -0.1946  | NA       |
| ATZG05935 | ATZG05935 | 3.566712 | 0        | 0        | 0        | 0        | 0        | 0.889303 | 2.15778  | 0        | 0.959536 | 1.330334 | 0        | -0.66749 | NA       | -0.08823 | NA       | -0.20356 | NA       |
| ATZG05940 | ATZG05940 | 194.9802 | 246.226  | 245.942  | 330.3449 | 338.5208 | 501.4109 | 569.1542 | 563.1805 | 487.1468 | 234.1267 | 228.8174 | 223.7558 | 0.744933 | 7.66E-05 | 1.211199 | 2.73E-11 | 0.002791 | 0.996189 |
| ATZG05950 | ATZG05950 | 7.133424 | 1.784246 | 6.438272 | 2.474493 | 0.662467 | 1.993682 | 2.66791  | 0        | 3.904984 | 9.595356 | 13.30334 | 5.179533 | -0.98268 | 0.126585 | -0.74972 | 0.286664 | 0.603714 | NA       |
| ATZG05960 | ATZG05960 | 0        | 1.784246 | 0        | 0        | 0        | 0        | 0.889303 | 2.15778  | 0        | 0.959536 | 2.660668 | 2.071813 | -0.43961 | 0.48586  | 0.24499  | 0.732562 | 0.600076 | NA       |
| ATZG05970 | ATZG05970 | 0        | 0        | 0        | 0        | 0        | 0        | 0.889303 | 0        | 0        | 0        | 0        | 1.035907 | 0        | NA       | 0.137906 | NA       | 0.15538  | NA       |
| ATZG05980 | ATZG05980 | 0        | 0        | 0        | 0        | 0        | 0.996841 | 1.778607 | 0        | 0.976246 | 1.919071 | 0        | 1.035907 | 0.086936 | NA       | 0.459317 | NA       | 0.490957 | NA       |
| ATZG05985 | ATZG05985 | 0        | 0        | 0        | 0        | 0        | 0        | 0        | 0        | 0        | 0        | 0        | 0        | #N/A     | #N/A     | #N/A     | #N/A     | #N/A     | #N/A     |
| ATZG05990 | MOD1      | 1005.813 | 906.397  | 911.6593 | 584.3929 | 586.946  | 709.7506 | 674.092  | 695.884  | 692.1584 | 924.0328 | 740.996  | 907.4541 | -0.58447 | 9.08E-06 | -0.4493  | 0.001116 | -0.13164 | 0.606829 |
| ATZG05995 | ATZG05995 | 8.322328 | 3.568492 | 7.725926 | 0.412416 | 0.662467 | 0.996841 | 1.778607 | 4.31556  | 6.833722 | 3.838143 | 5.321336 | 9.323159 | -1.81912 | 0.002567 | -0.44877 | 0.541822 | -0.07419 | NA       |
| ATZG06000 | ATZG06000 | 136.724  | 155.2294 | 139.0667 | 133.2102 | 133.8184 | 149.5261 | 122.7239 | 144.5713 | 105.4346 | 108.4275 | 118.3997 | 125.3447 | -0.04801 | 0.842513 | -0.20157 | 0.371783 | -0.27971 | 0.38561  |
| ATZG06002 | ATZG06002 | 22.58917 | 24.97944 | 14.1642  | 17.73387 | 25.17376 | 12.95893 | 46.24378 | 22.65669 | 38.07359 | 18.23118 | 29.26735 | 19.68222 | -0.10525 | 0.839498 | 0.735939 | 0.083216 | 0.101218 | 0.920201 |
| ATZG06005 | FIP1      | 36.85602 | 24.97944 | 29.61605 | 42.89122 | 47.69764 | 43.86099 | 37.35052 | 28.05114 | 39.04984 | 34.54328 | 33.25835 | 36.25673 | 0.501878 | 0.10669  | 0.162022 | 0.686026 | 0.153364 | 0.825611 |
| ATZG06010 | ORGA      | 114.1348 | 155.2294 | 141.642  | 180.2256 | 205.3649 | 192.3903 | 241.8905 | 196.358  | 231.3703 | 132.4159 | 101.1054 | 164.7091 | 0.485802 | 0.019649 | 0.696452 | 0.000688 | -0.02637 | 0.963148 |
| ATZG06020 | ATZG06020 | 0        | 0        | 0        | 0        | 0        | 0        | 0.889303 | 0        | 0        | 0        | 0        | 0        | #N/A     | #N/A     | #N/A     | #N/A     | #N/A     | #N/A     |
| ATZG06025 | ATZG06025 | 474.3727 | 572.743  | 687.6074 | 586.0425 | 633.3187 | 540.2877 | 714.1107 | 662.4384 | 754.6382 | 584.3572 | 569.3829 | 685.7701 | 0.022227 | 0.919762 | 0.293019 | 0.09654  | 0.084701 | 0.809997 |
| ATZG06040 | ATZG06040 | 80.84547 | 99.91778 | 73.3963  | 65.16166 | 57.63465 | 69.77885 | 65.80846 | 62.57562 | 48.8123  | 82.52006 | 61.19536 | 74.58527 | -0.37691 | 0.130197 | -0.48559 | 0.063279 | -0.18727 | 0.694094 |
| ATZG06045 | ATZG06045 | 1.188904 | 0        | 0        | 1.237247 | 1.324935 | 0        | 6.225124 | 2.15778  | 0        | 1.919071 | 3.991002 | 0        | 0.138908 | 0.857357 | 0.781678 | 0.244597 | 0.509895 | NA       |
| ATZG06050 | OPR3      | 265.1256 | 224.815  | 254.9556 | 720.9024 | 655.1801 | 707.757  | 698.1032 | 813.483  | 1055.322 | 285.9416 | 271.3881 | 252.7612 | 1.449108 | 3.74E-19 | 1.743939 | 2.27E-27 | 0.112623 | 0.768141 |
| ATZG06060 | ATZG06060 | 0        | 0        | 0        | 0        | 0        | 0        | 0.889303 | 0        | 0        | 0        | 1.330334 | 0        | 0        | NA       | 0.141773 | NA       | 0.183636 | NA       |
| ATZG06070 | ATZG06070 | 0        | 1.784246 | 0        | 0        | 0        | 0        | 0.889303 | 1.07889  | 0.976246 | 0        | 5.321336 | 1.035907 | -0.41299 | 0.509915 | 0.220856 | 0.757922 | 0.604217 | NA       |
| ATZG06080 | ATZG06080 | 0        | 0        | 0        | 0        | 0        | 0        | 0.889303 | 0        | 0        | 0        | 0        | 0        | 0        | NA       | 0.160764 | NA       | 0        | NA       |
| ATZG06090 | ATZG06090 | 0        | 0        | 0        | 0        | 0        | 0        | 0        | 0        | 0        | 0        | 0        | 0        | #N/A     | #N/A     | #N/A     | #N/A     | #N/A     | #N/A     |
| ATZG06095 | ATZG06095 | 0        | 0        | 0        | 0        | 0        | 0        | 0        | 0        | 0        | 0        | 0        | 0        | #N/A     | #N/A     | #N/A     | #N/A     | #N/A     | #N/A     |
| ATZG06100 | ATZG06100 | 1.188904 | 0        | 0        | 0        | 0        | 0.996841 | 0        | 0        | 0        | 0        | 0        | 1.035907 | -0.05851 | NA       | -0.21424 | NA       | -0.02687 | NA       |
| ATZG06110 | ATZG06110 | 0        | 0        | 0        | 0        | 0        | 0        | 0        | 0        | 0        | 0        | 0        | 0        | #N/A     | #N/A     | #N/A     | #N/A     | #N/A     | #N/A     |
| ATZG06120 | ATZG06120 | 0        | 0        | 0        | 0.662467 | 0        | 0        | 0        | 0        | 0        | 0        | 0        | 0        | 0.128567 | NA       | 0        | NA       | 0        | NA       |
| ATZG06125 | ATZG06125 | 0        | 0        | 0        | 0        | 0        | 0        | 0        | 0        | 0        | 0        | 0        | 0        | #N/A     | #N/A     | #N/A     | #N/A     | #N/A     | #N/A     |
| ATZG06130 | ATZG06130 | 0        | 0        | 0        | 0.412416 | 0.662467 | 0        | 0        | 0        | 0        | 0        | 1.330334 | 0        | 0.213241 | NA       | 0        | NA       | 0.204858 | NA       |
| ATZG06140 | ATZG06140 | 0        | 0        | 0        | 0        | 0        | 0        | 0        | 0        | 0        | 0        | 1.330334 | 0        | 0        | NA       | 0        | NA       | 0.172362 | NA       |
| ATZG06150 | ATZG06150 | 0        | 0        | 0        | 0        | 0        | 0.889303 | 0        | 0        | 0        | 0        | 0        | 0        | 0        | NA       | 0.160764 | NA       | 0        | NA       |
| ATZG06160 | ATZG06160 | 0        | 0        | 0        | 0        | 0        | 2.66791  | 0        | 0        | 0        | 0        | 0        | 0        | 0        | NA       | 0.335767 | NA       | 0        | NA       |
| ATZG06165 | ATZG06165 | 0        | 0        | 0        | 0        | 0        | 0.889303 | 0        | 0        | 0        | 0        | 0        | 0        | 0        | NA       | 0.160764 | NA       | 0        | NA       |
| ATZG06166 | ATZG06166 | 0        | 0        | 0        | 0        | 0        | 0        | 0        | 0        | 0        | 0        | 0        | 0        | #N/A     | #N/A     | #N/A     | #N/A     | #N/A     | #N/A     |
| ATZG06170 | ATZG06170 | 0        | 0        | 0        | 0.662467 | 1.778607 | 0        | 0.976246 | 0        | 0.976246 | 1.330334 | 0        | 0        | 0.08009  | NA       | 0.457328 | NA       | 0.194104 | NA       |
| ATZG06180 | ATZG06180 | 0        | 0        | 0        | 0        | 0        | 0        | 0        | 0        | 0.959536 | 0        | 1.035907 | 0        | 0        | NA       | 0        | NA       | 0.332992 | NA       |
| ATZG06190 | ATZG06190 | 0        | 0        | 0        | 0        | 0        | 0        | 0        | 0        | 0        | 0        | 0        | 0        | #N/A     | #N/A     | #N/A     | #N/A     | #N/A     | #N/A     |
| ATZG06200 | GRF6      | 8.322328 | 12.48972 | 7.725926 | 9.897974 | 14.57428 | 8.971567 | 2.66791  | 3.23667  | 6.833722 | 5.757214 | 5.321336 | 4.143626 | 0.251912 | 0.684611 | -0.84287 | 0.162662 | -0.65726 | NA       |
| ATZG06210 | VIP6      | 460.1058 | 406.8081 | 404.3235 | 284.9792 | 277.5738 | 302.0428 | 349.4963 | 380.8481 | 355.3535 | 367.5021 | 379.1452 | 398.824  | -0.55664 | 6.26E-06 | -0.22938 | 0.105661 | -0.15186 | 0.512274 |
| ATZG06220 | ATZG06220 | 0        | 0        | 0        | 0        | 0        | 0        | 0        | 0        | 0        | 0        | 0        | 0        | #N/A     | #N/A     | #N/A     | #N/A     | #N/A     | #N/A     |
| ATZG06230 | ATZG06230 | 0        | 0        | 0        | 0        | 0        | 0.889303 | 0        | 0        | 0        | 0        | 0        | 1.035907 | 0        | NA       | 0.137906 | NA       | 0.15538  | NA       |
| ATZG06235 | ATZG06235 | 1.188904 | 0        | 0        | 0        | 0        | 0        | 0        | 0        | 0        | 0        | 0        | 0        | -0.2184  | NA       | -0.20558 | NA       | -0.19918 | NA       |
| ATZG06240 | ATZG06240 | 0        | 0        | 0        | 0.662467 | 0        | 0.889303 | 0        | 0        | 0        | 0        | 1.330334 | 0        | 0.09913  | NA       | 0.145297 | NA       | 0.18929  | NA       |
| ATZG06245 | ATZG06245 | 0        | 0        | 0        | 0        | 0        | 0        | 0        | 0        | 0        | 0        | 0        | 0        | #N/A     | #N/A     | #N/A     | #N/A     | #N/A     | #N/A     |
| ATZG06250 | ATZG06250 | 0        | 0        | 0        | 0        | 0        | 0.889303 | 0        | 0        | 0        | 0        | 0        | 1.035907 | 0        | NA       | 0.137906 | NA       | 0.15538  | NA       |
| ATZG06255 | EFL3      | 20.21137 | 28.54794 | 23.17778 | 58.97543 | 47.69764 | 43.86099 | 52.46891 | 39.91893 | 67.36097 | 17.27164 | 15.96401 | 17.61041 | 1.027673 | 0.001404 | 0.192717 | 0.000935 | -0.42423 | 0.519436 |
| ATZG06260 | ATZG06260 | 0        | 0        | 0        | 0        | 0        | 0        | 0        | 0        | 0.959536 | 0        | 0        | 0        | 0        | NA       | 0        | NA       | 0.171512 | NA       |
| ATZG06270 |           |          |          |          |          |          |          |          |          |          |          |          |          |          |          |          |          |          |          |



|             |           |          |          |          |          |          |          |          |          |          |          |          |          |           |          |          |          |          |          |
|-------------|-----------|----------|----------|----------|----------|----------|----------|----------|----------|----------|----------|----------|----------|-----------|----------|----------|----------|----------|----------|
| AT2G07420   | AT2G07420 | 1.188904 | 1.784246 | 0        | 0        | 0        | 0        | 0        | 0        | 0.976246 | 0        | 1.330334 | 2.071813 | -0.57989  | NA       | -0.30195 | NA       | 0.096811 | NA       |
| AT2G07430   | AT2G07430 | 0        | 0        | 0        | 0        | 0        | 0        | 0        | 0.889303 | 0        | 0        | 0        | 0        | 0         | NA       | 0.160764 | NA       | 0        | NA       |
| AT2G07440   | AT2G07440 | 0        | 1.784246 | 3.862963 | 0.412416 | 0        | 0        | 0.996841 | 0        | 0        | 2.878607 | 1.330334 | 0        | -0.60879  | 0.33134  | -0.83578 | 0.165804 | -0.17272 | NA       |
| AT2G07450   | AT2G07450 | 0        | 0        | 0        | 0        | 0        | 0        | 0        | 0.889303 | 0        | 0        | 0        | 0        | 0         | NA       | 0.160764 | NA       | 0        | NA       |
| AT2G07455   | AT2G07455 | 0        | 0        | 0        | 0        | 0        | 0        | 0        | 0        | 0        | 0        | 0        | 0        | #N/A      | #N/A     | #N/A     | #N/A     | #N/A     | #N/A     |
| AT2G07460   | AT2G07460 | 0        | 0        | 0        | 0        | 0        | 0        | 0        | 1.07889  | 0        | 0        | 0        | 0        | 0         | NA       | 0.16673  | NA       | 0        | NA       |
| AT2G07470   | AT2G07470 | 0        | 0        | 0        | 0        | 0        | 0        | 0        | 0        | 0        | 0        | 0        | 0        | #N/A      | #N/A     | #N/A     | #N/A     | #N/A     | #N/A     |
| AT2G07480   | AT2G07480 | 0        | 0        | 0        | 0        | 0        | 0        | 0        | 0        | 0        | 0        | 0        | 1.035907 | 0         | NA       | 0        | NA       | 0.172362 | NA       |
| AT2G07483   | AT2G07483 | 0        | 0        | 0        | 0.412416 | 0.662467 | 0        | 0        | 0        | 0        | 0        | 0        | 1.035907 | 0.210648  | NA       | 0        | NA       | 0.178505 | NA       |
| AT2G07486   | AT2G07486 | 0        | 0        | 0        | 0        | 0        | 0        | 0        | 0        | 0        | 0        | 0        | 0        | #N/A      | #N/A     | #N/A     | #N/A     | #N/A     | #N/A     |
| AT2G07490   | AT2G07490 | 0        | 0        | 0        | 0        | 0        | 0        | 0.889303 | 1.07889  | 0        | 0        | 0        | 0        | 0         | NA       | 0.3225   | NA       | 0        | NA       |
| AT2G07500   | AT2G07500 | 1.188904 | 0        | 0        | 0        | 0        | 0        | 0.889303 | 0        | 0        | 0        | 0        | 1.035907 | -0.2447   | NA       | -0.0484  | NA       | -0.02732 | NA       |
| AT2G07505   | AT2G07505 | 0        | 0        | 0        | 0        | 0        | 0        | 0        | 0        | 0        | 0        | 0        | 0        | #N/A      | #N/A     | #N/A     | #N/A     | #N/A     | #N/A     |
| AT2G07510   | AT2G07510 | 1.188904 | 0        | 0        | 0        | 0        | 0        | 0        | 0        | 0.976246 | 0        | 0        | 1.035907 | -0.24535  | NA       | -0.04001 | NA       | -0.02753 | NA       |
| AT2G07520   | AT2G07520 | 0        | 0        | 0        | 0        | 0        | 0        | 0        | 0        | 0        | 0        | 1.330334 | 0        | 0         | NA       | 0        | NA       | 0.172362 | NA       |
| AT2G07521   | AT2G07521 | 0        | 0        | 0        | 0        | 0        | 0        | 0        | 0        | 0        | 0        | 0        | 0        | #N/A      | #N/A     | #N/A     | #N/A     | #N/A     | #N/A     |
| AT2G07530   | AT2G07530 | 1.188904 | 0        | 0        | 0        | 0        | 0        | 0        | 0        | 0        | 0        | 0        | 0        | -0.2184   | NA       | -0.20558 | NA       | -0.19918 | NA       |
| AT2G07540   | AT2G07540 | 1.188904 | 0        | 0        | 0        | 1.324935 | 0        | 1.778607 | 1.07889  | 1.952492 | 0        | 0        | 0        | -0.02163  | NA       | 0.532544 | NA       | -0.25771 | NA       |
| AT2G07550   | AT2G07550 | 0        | 0        | 0        | 0        | 0        | 0        | 1.778607 | 0        | 0.976246 | 0        | 0        | 0        | 0         | NA       | 0.449696 | NA       | 0        | NA       |
| AT2G07560   | AHA6      | 0        | 14.27397 | 0        | 0.412416 | 0        | 0        | 0.889303 | 0        | 0        | 0.959536 | 2.660668 | 1.035907 | -1.25621  | 0.034016 | -1.11827 | 0.067749 | -0.64724 | NA       |
| AT2G07570   | AT2G07570 | 0        | 0        | 0        | 0        | 0        | 0        | 0.889303 | 0        | 0        | 0        | 0        | 0        | 0         | NA       | 0.160764 | NA       | 0        | NA       |
| AT2G07580   | AT2G07580 | 0        | 0        | 0        | 0        | 0        | 0        | 0        | 0        | 0        | 0        | 0        | 1.035907 | 0         | NA       | 0        | NA       | 0.172362 | NA       |
| AT2G07590   | AT2G07590 | 0        | 0        | 0        | 0        | 0        | 0        | 0        | 0        | 0        | 0        | 0        | 0        | #N/A      | #N/A     | #N/A     | #N/A     | #N/A     | #N/A     |
| AT2G07599   | AT2G07599 | 3.566712 | 1.784246 | 1.287654 | 3.299325 | 2.649869 | 1.993682 | 0.889303 | 0        | 3.904984 | 0.959536 | 1.330334 | 0        | 0.186298  | 0.819272 | -0.2159  | 0.800117 | -0.58207 | NA       |
| AT2G07600   | AT2G07600 | 2.377808 | 7.136984 | 5.150617 | 0.412416 | 4.637271 | 1.993682 | 12.45025 | 1.07889  | 6.833722 | 1.919071 | 7.982004 | 4.143626 | -0.60375  | 0.392312 | 0.353157 | 0.65596  | -0.03494 | NA       |
| AT2G07620   | AT2G07620 | 0        | 0        | 1.287654 | 0        | 0        | 0        | 0.889303 | 1.07889  | 0        | 0.959536 | 0        | 2.071813 | -0.34723  | NA       | 0.108591 | NA       | 0.294331 | NA       |
| AT2G07630   | AT2G07630 | 0        | 0        | 0        | 0        | 0        | 0        | 0        | 0        | 0        | 0        | 2.660668 | 0        | 0         | NA       | 0        | NA       | 0.322821 | NA       |
| AT2G07635   | AT2G07635 | 0        | 0        | 0        | 0        | 0        | 0        | 0        | 0        | 0        | 0        | 0        | 0        | #N/A      | #N/A     | #N/A     | #N/A     | #N/A     | #N/A     |
| AT2G07640   | AT2G07640 | 9.511232 | 12.48972 | 15.45185 | 21.44561 | 22.52389 | 17.94313 | 16.00746 | 20.49891 | 20.50117 | 10.55489 | 10.64267 | 20.71813 | 0.650303  | 0.13971  | 0.521532 | 0.287873 | 0.145383 | 0.88731  |
| AT2G07650   | AT2G07650 | 0        | 0        | 0        | 0.412416 | 0.662467 | 0        | 0        | 0        | 0        | 0        | 0        | 1.035907 | 0.210648  | NA       | 0        | NA       | 0.178505 | NA       |
| AT2G07660   | AT2G07660 | 1.188904 | 0        | 0        | 0        | 0        | 0        | 0        | 1.07889  | 1.952492 | 0        | 0        | 0        | -0.27854  | NA       | 0.282008 | NA       | -0.23202 | NA       |
| AT2G07663   | AT2G07663 | 1.188904 | 0        | 0        | 1.237247 | 1.987402 | 0        | 0.889303 | 0        | 0.976246 | 0        | 0        | 0        | 0.364614  | NA       | 0.097081 | NA       | -0.2502  | NA       |
| AT2G07664   | AT2G07664 | 0        | 0        | 0        | 0        | 0        | 0        | 0        | 0        | 0.976246 | 0        | 1.330334 | 1.035907 | 0         | NA       | 0.170848 | NA       | 0.383711 | NA       |
| AT2G07666   | AT2G07666 | 1.188904 | 0        | 0        | 0        | 0        | 0        | 0        | 0        | 0        | 0        | 0        | 0        | -0.2184   | NA       | -0.20558 | NA       | -0.19918 | NA       |
| AT2G07667   | AT2G07667 | 10.70014 | 1.784246 | 0        | 1.237247 | 3.312336 | 0.996841 | 0        | 1.07889  | 3.904984 | 1.919071 | 3.991002 | 5.179533 | -0.60079  | 0.401981 | -0.64838 | 0.382791 | -0.11907 | NA       |
| AT2G07669   | AT2G07669 | 2.377808 | 1.784246 | 0        | 0.412416 | 1.324935 | 0        | 0.889303 | 1.07889  | 0        | 0        | 0        | 0        | -0.32614  | NA       | -0.29928 | NA       | -0.67163 | NA       |
| AT2G07670   | AT2G07670 | 1.188904 | 0        | 1.287654 | 0        | 0        | 0        | 0.889303 | 0        | 0        | 0        | 0        | 0        | -0.47657  | NA       | -0.252   | NA       | -0.43611 | NA       |
| AT2G07671   | AT2G07671 | 35.66712 | 64.23286 | 32.19136 | 47.84021 | 64.92179 | 47.84836 | 40.01866 | 29.13003 | 78.09968 | 38.38143 | 47.89202 | 49.72351 | 0.282888  | 0.497858 | 0.169276 | 0.72381  | 0.059015 | 0.951396 |
| AT2G07672   | AT2G07672 | 1.188904 | 0        | 1.287654 | 0.412416 | 0        | 0        | 0.889303 | 0        | 0        | 0        | 1.330334 | 0        | -0.3877   | NA       | -0.2706  | NA       | -0.22077 | NA       |
| AT2G07673   | AT2G07673 | 0        | 1.784246 | 0        | 0.412416 | 0        | 0        | 0        | 0        | 0.959536 | 0        | 0        | 0        | -0.17674  | NA       | -0.26494 | NA       | -0.07273 | NA       |
| AT2G07674   | AT2G07674 | 4.755616 | 1.784246 | 2.575309 | 0.824831 | 0.662467 | 0.996841 | 1.778607 | 1.07889  | 0        | 0        | 0        | 2.071813 | -0.84943  | 0.204976 | -0.74388 | 0.291396 | -0.85884 | NA       |
| AT2G07675   | AT2G07675 | 13.07794 | 16.05821 | 9.01358  | 19.79595 | 15.89921 | 16.94629 | 8.003731 | 15.10446 | 31.23987 | 9.595356 | 3.991002 | 13.46678 | 0.41136   | 0.457731 | 0.433959 | 0.459845 | -0.34934 | NA       |
| AT2G07676   | AT2G07676 | 0        | 0        | 0        | 0        | 1.987402 | 0        | 0        | 0        | 1.07889  | 2.928738 | 0        | 0        | 0.286412  | NA       | 0.524207 | NA       | 0        | NA       |
| AT2G07677   | AT2G07677 | 10.70014 | 8.92123  | 2.575309 | 10.31039 | 12.58688 | 4.984204 | 13.33955 | 2.15778  | 5.857476 | 11.51443 | 10.64267 | 6.215439 | -0.275997 | 0.683362 | -0.01905 | 0.980879 | 0.261128 | NA       |
| AT2G07678   | AT2G07678 | 1.188904 | 1.784246 | 1.287654 | 2.474493 | 5.299738 | 1.993682 | 1.778607 | 3.23667  | 9.282738 | 1.919071 | 1.330334 | 2.071813 | 0.637931  | 0.364151 | 0.415808 | 0.598024 | 0.132185 | NA       |
| AT2G07680   | ATMRP11   | 248.4809 | 228.3835 | 231.7778 | 100.217  | 108.6446 | 118.6241 | 108.495  | 135.9401 | 57.59851 | 190.9476 | 227.4871 | 195.7863 | -1.07871  | 3.4E-06  | -1.18619 | 3.4E-06  | -0.20206 | 0.657529 |
| AT2G07681   | AT2G07681 | 3.566712 | 3.568492 | 0        | 3.299325 | 3.312336 | 1.993682 | 2.66791  | 2.15778  | 5.857476 | 4.797678 | 6.65167  | 6.215439 | 0.151316  | 0.849649 | 0.332674 | 0.675033 | 0.819962 | NA       |
| AT2G07682   | AT2G07682 | 3.566712 | 5.352738 | 2.575309 | 3.71174  | 5.299738 | 3.987363 | 9.782338 | 7.55223  | 1.952492 | 0        | 1.330334 | 4.143626 | 0.137552  | 0.863244 | 0.536779 | 0.465517 | -0.53748 | NA       |
| AT2G07683   | AT2G07683 | 4.755616 | 8.92123  | 1.287654 | 4.536571 | 5.962205 | 3.987363 | 2.66791  | 3.23667  | 1.952492 | 1.919071 | 2.660668 | 4.143626 | 0.058332  | 0.943829 | -0.53059 | 0.473394 | -0.43576 | NA       |
| AT2G07684   | AT2G07684 | 1.188904 | 0        | 2.575309 | 0.824831 | 0.662467 | 0.996841 | 0.889303 | 0        | 0.976246 | 1.919071 | 3.991002 | 1.035907 | -0.27377  | 0.720253 | -0.34011 | 0.658333 | 0.352395 | NA       |
| AT2G07685   | AT2G07685 | 0        | 0        | 0        | 0        | 0        | 0        | 0.889303 | 1.07889  | 1.952492 | 0        | 3.991002 | 0        | 0         | NA       | 0.601846 | NA       | 0.552517 | NA       |
| AT2G07686   | AT2G07686 | 0        | 3.568492 | 0        | 0        | 1.324935 | 1.993682 | 2.66791  | 0        | 3.904984 | 0.959536 | 2.660668 | 1.035907 | -0.04945  | 0.952296 | 0.401508 | 0.591164 | 0.162797 | NA       |
| AT2G07687   | COX3      | 3.566712 | 10.70548 | 7.725926 | 12.37247 | 19.87402 | 14.95261 | 8.893035 | 7.55223  | 15.61994 | 12.47396 | 5.321336 | 7.251346 | 0.930664  | 0.071647 | 0.459143 | 0.459344 | 0.198317 | NA       |
| AT2G07688   | AT2G07688 | 85.60108 | 99.91778 | 32.19136 | 58.1506  | 75.52127 | 73.76622 | 67.58706 | 65.81229 | 97.6246  | 43.1791  | 35.91902 | 85.98024 | -0.05705  | 0.908615 | 0.088867 | 0.863336 | -0.34296 | 0.625371 |
| AT2G07689   | AT2G07689 | 4.755616 | 3.568492 | 1.287654 | 2.886909 | 7.28714  | 5.981405 | 5.335821 | 2.15778  | 5.857476 | 1.919071 | 1.330334 | 4.143626 | 0.466145  | 0.508492 | 0.302024 | 0.700542 | -0.20297 | NA       |
| AT2G07690   | MCM5      | 208.0582 | 167.7191 | 127.2758 | 155.4087 | 166.4914 | 160.4914 | 112.0552 | 130.5457 | 119.102  | 234.1267 | 203.5411 | 227.8994 | -0.59556  | 0.000614 | 0.274945 | 0.305041 | 0.274945 | 0.305041 |
| AT2G07691   | AT2G07691 | 0        | 0        | 0        | 0        | 0.662467 | 0        | 1.778607 | 0        | 0        | 0.959536 | 2.660668 | 0        | 0.064082  | NA       | 0.285865 | NA       | 0.504154 | NA       |
| AT2G07692   | AT2G07692 | 0        | 0        | 1.287654 | 0.412416 | 1.324935 | 0.996841 | 1.778607 | 2.15778  | 0.976246 | 1.919071 | 1.330334 | 0        | 0.172132  | 0.821618 | 0.531079 | 0.449352 | 0.287169 | NA       |
| AT2G07693   | AT2G07693 | 2.377808 | 1.784246 | 2.575309 | 3.71174  | 3.24935  | 0.996841 | 1.778607 | 5.39445  | 0        | 0.959536 | 1.330334 | 4.143626 | -0.03698  | 0.966029 | 0.019885 | 0.981997 | -0.03348 | NA       |
| AT2G07694   | AT2G07694 | 0        | 0        | 0        | 0.824831 | 0        | 0.996841 | 0        | 2.15778  | 0        | 0        | 0        | 2.071813 | 0.262902  | NA       | 0.297575 | NA       | 0.3015   | NA       |
| AT2G07695   | AT2G07695 | 4.755616 | 3.568492 | 5.150617 | 5.361402 | 4.637271 | 3.987363 | 4.446517 | 6.47334  | 6.833722 | 5.757214 | 7.982004 | 0        | 0.033526  | 0.966796 | 0.255391 | 0.744944 | -0.0271  | NA       |
| AT2G07696   | RP57      | 2.377808 | 1.784246 | 1.287654 | 3.299325 | 3.974804 | 3.987363 | 3.557214 | 5.39445  | 6.833722 | 0.959536 | 9.312338 | 3.10772  | 0.503559  | 0.480293 | 0.838165 | 0.229181 | 0.616004 | NA       |
| AT2G07697</ |           |          |          |          |          |          |          |          |          |          |          |          |          |           |          |          |          |          |          |

|           |           |          |          |          |          |          |          |          |          |          |          |          |          |          |          |          |          |          |          |          |    |
|-----------|-----------|----------|----------|----------|----------|----------|----------|----------|----------|----------|----------|----------|----------|----------|----------|----------|----------|----------|----------|----------|----|
| AT2G07740 | AT2G07740 | 0        | 0        | 0        | 0.412416 | 0        | 0        | 0        | 0        | 0        | 0        | 0        | 0.095918 | NA       | 0        | NA       | 0        | NA       |          |          |    |
| AT2G07741 | ATP6-1    | 7.133424 | 1.784246 | 2.575309 | 7.835896 | 5.962205 | 3.987363 | 8.893035 | 4.31556  | 4.88123  | 5.757214 | 7.982004 | 7.251346 | 0.406857 | 0.542293 | 0.393903 | 0.584797 | 0.530523 | NA       |          |    |
| AT2G07742 | AT2G07742 | 0        | 0        | 0        | 0        | 0        | 0        | 0.889303 | 0        | 0        | 0        | 0        | 0        | 0        | NA       | 0.160764 | NA       | 0        | NA       |          |    |
| AT2G07743 | AT2G07743 | 0        | 0        | 0        | 0.412416 | 0        | 0        | 0        | 0        | 0        | 0.959536 | 0        | 0        | 0        | 0.066171 | NA       | 0        | NA       | 0.145274 | NA       |    |
| AT2G07744 | AT2G07744 | 0        | 0        | 0        | 0        | 0.662467 | 0        | 0        | 0        | 0        | 0        | 1.330334 | 0        | 0.101524 | NA       | 0        | NA       | 0        | 0.179327 | NA       |    |
| AT2G07745 | AT2G07745 | 0        | 0        | 0        | 0.412416 | 0        | 0        | 0        | 0        | 0        | 0        | 0        | 0        | 0.095918 | NA       | 0        | NA       | 0        | NA       | NA       |    |
| AT2G07746 | AT2G07746 | 0        | 0        | 0        | 0        | 0        | 0        | 0        | 0        | 0        | 0.959536 | 0        | 0        | 0        | 0        | NA       | 0        | NA       | 0        | 0.171512 | NA |
| AT2G07747 | AT2G07747 | 2.377808 | 3.568492 | 1.287654 | 2.474493 | 1.987402 | 0        | 0.889303 | 2.15778  | 4.88123  | 0        | 0        | 4.143626 | -0.23535 | 0.76761  | 0.090997 | 0.917233 | -0.28902 | NA       | NA       |    |
| AT2G07748 | AT2G07748 | 2.377808 | 1.784246 | 2.575309 | 2.062078 | 5.299738 | 0.996841 | 2.66791  | 2.15778  | 1.952492 | 1.919071 | 1.330334 | 5.179533 | 0.174308 | 0.83066  | -0.01248 | 0.988751 | 0.170767 | NA       | NA       |    |
| AT2G07749 | AT2G07749 | 5.94452  | 7.136984 | 1.287654 | 0.412416 | 0        | 0        | 0.889303 | 2.15778  | 0        | 0.959536 | 1.330334 | 4.143626 | -1.6643  | 0.007693 | -1.09027 | 0.108894 | -0.62391 | NA       | NA       |    |
| AT2G07750 | RH33      | 1.188904 | 10.70548 | 12.87654 | 8.248311 | 7.28714  | 8.971567 | 9.782338 | 3.23667  | 9.76246  | 6.716749 | 1.330334 | 11.39497 | 0.01595  | 0.983878 | -0.04801 | 0.953207 | -0.19012 | NA       | NA       |    |
| AT2G07751 | AT2G07751 | 4.755616 | 5.352738 | 3.862963 | 5.361402 | 7.28714  | 5.981045 | 0.889303 | 7.55223  | 4.88123  | 6.716749 | 2.660668 | 3.10772  | 0.308363 | 0.664663 | -0.06539 | 0.93877  | -0.07595 | NA       | NA       |    |
| AT2G07752 | AT2G07752 | 0        | 0        | 0        | 0        | 0        | 0        | 0        | 0        | 0        | 0        | 0        | 0        | #N/A     | #N/A     | #N/A     | #N/A     | #N/A     | #N/A     | #N/A     | NA |
| AT2G07753 | AT2G07753 | 0        | 0        | 0        | 0        | 0        | 0        | 0        | 0        | 0        | 0        | 0        | 0        | #N/A     | #N/A     | #N/A     | #N/A     | #N/A     | #N/A     | #N/A     | NA |
| AT2G07754 | AT2G07754 | 0        | 0        | 0        | 0        | 0        | 0        | 0        | 0        | 0        | 0        | 0        | 0        | #N/A     | #N/A     | #N/A     | #N/A     | #N/A     | #N/A     | #N/A     | NA |
| AT2G07755 | AT2G07755 | 0        | 1.784246 | 0        | 0.412416 | 0.662467 | 0        | 0.889303 | 0        | 0        | 0        | 0        | 0        | -0.04506 | NA       | -0.09397 | NA       | -0.27592 | NA       | NA       | NA |
| AT2G07756 | AT2G07756 | 0        | 1.784246 | 0        | 0        | 0        | 0        | 0.889303 | 1.07889  | 0.976246 | 0.959536 | 1.330334 | 0        | -0.41264 | NA       | 0.267707 | NA       | 0.132561 | NA       | NA       | NA |
| AT2G07757 | AT2G07757 | 0        | 0        | 0        | 0        | 0        | 0        | 0        | 0        | 0        | 0        | 0        | 0        | #N/A     | #N/A     | #N/A     | #N/A     | #N/A     | #N/A     | #N/A     | NA |
| AT2G07758 | AT2G07758 | 2.377808 | 0        | 0        | 0        | 0        | 0        | 0        | 0        | 0        | 0        | 0        | 0        | -0.32938 | NA       | -0.31889 | NA       | -0.31551 | NA       | NA       | NA |
| AT2G07759 | AT2G07759 | 0        | 0        | 0        | 0        | 0        | 0        | 0.889303 | 0        | 0        | 0.959536 | 0        | 0        | 0        | NA       | 0.13694  | NA       | 0.147196 | NA       | NA       | NA |
| AT2G07760 | AT2G07760 | 0        | 0        | 0        | 0        | 0        | 0        | 0        | 0        | 0        | 0.959536 | 0        | 0        | 0        | NA       | 0        | NA       | 0.171512 | NA       | NA       | NA |
| AT2G07761 | AT2G07761 | 0        | 0        | 0        | 0        | 0.662467 | 0        | 0        | 0        | 0        | 0        | 0        | 0        | 0.128567 | NA       | 0        | NA       | 0        | NA       | NA       | NA |
| AT2G07762 | AT2G07762 | 0        | 0        | 0        | 0.824831 | 0        | 0        | 0        | 0        | 0        | 0        | 1.330334 | 0        | 0.140102 | NA       | 0        | NA       | 0.173173 | NA       | NA       | NA |
| AT2G07763 | AT2G07763 | 0        | 1.784246 | 0        | 0        | 0        | 0        | 0        | 0        | 0        | 0        | 1.330334 | 0        | -0.27254 | NA       | -0.25305 | NA       | -0.03925 | NA       | NA       | NA |
| AT2G07764 | AT2G07764 | 1.188904 | 0        | 0        | 0        | 0        | 0        | 0        | 0        | 0        | 0        | 0        | 0        | -0.2184  | NA       | -0.20558 | NA       | -0.19918 | NA       | NA       | NA |
| AT2G07765 | AT2G07765 | 0        | 0        | 0        | 1.237247 | 0        | 0.996841 | 0.889303 | 0        | 0        | 0        | 1.330334 | 0        | 0.387202 | NA       | 0.142372 | NA       | 0.190356 | NA       | NA       | NA |
| AT2G07766 | AT2G07766 | 0        | 0        | 0        | 0        | 0        | 0        | 0        | 0        | 0        | 0        | 0        | 0        | #N/A     | #N/A     | #N/A     | #N/A     | #N/A     | #N/A     | #N/A     | NA |
| AT2G07767 | AT2G07767 | 1.188904 | 1.784246 | 0        | 0.824831 | 2.649869 | 0        | 3.557214 | 0        | 1.952492 | 0.959536 | 1.330334 | 0        | 0.098451 | 0.902149 | 0.354049 | 0.636508 | -0.0984  | NA       | NA       | NA |
| AT2G07768 | AT2G07768 | 1.188904 | 1.784246 | 1.287654 | 1.649662 | 1.987402 | 0        | 2.66791  | 2.15778  | 1.952492 | 0        | 2.660668 | 2.071813 | -0.05431 | 0.950228 | 0.323152 | 0.687042 | 0.036963 | NA       | NA       | NA |
| AT2G07769 | AT2G07769 | 0        | 0        | 0        | 0        | 0        | 0        | 0        | 0        | 1.07889  | 0.976246 | 0.959536 | 0        | 0        | NA       | 0.341656 | NA       | 0.658829 | NA       | NA       | NA |
| AT2G07770 | AT2G07770 | 0        | 0        | 0        | 0        | 0        | 0        | 0.996841 | 0.889303 | 0        | 0        | 0        | 0        | 0.133397 | NA       | 0.133015 | NA       | 0        | NA       | NA       | NA |
| AT2G07771 | CCMC      | 1.188904 | 1.784246 | 0        | 1.237247 | 1.987402 | 0.996841 | 1.778607 | 0        | 1.952492 | 0.959536 | 1.330334 | 2.071813 | 0.209353 | 0.789226 | 0.138084 | 0.87097  | 0.212307 | NA       | NA       | NA |
| AT2G07772 | AT2G07772 | 2.377808 | 1.784246 | 1.287654 | 1.649662 | 0.662467 | 0.996841 | 0        | 1.07889  | 0.976246 | 0.959536 | 0        | 2.071813 | -0.25612 | 0.740695 | -0.50457 | 0.489291 | -0.29856 | NA       | NA       | NA |
| AT2G07773 | AT2G07773 | 1.188904 | 5.352738 | 1.287654 | 4.124156 | 4.637271 | 2.990522 | 4.446517 | 1.07889  | 1.952492 | 1.919071 | 2.660668 | 1.035907 | 0.460721 | 0.527054 | 0.042607 | 0.962284 | -0.19535 | NA       | NA       | NA |
| AT2G07774 | AT2G07774 | 26.15589 | 17.84246 | 18.02716 | 34.64291 | 33.78583 | 30.90206 | 21.34328 | 20.49891 | 59.55101 | 21.10978 | 17.29434 | 12.43088 | 0.589716 | 0.18661  | 0.609493 | 0.196149 | -0.25607 | 0.780918 | NA       | NA |
| AT2G07775 | AT2G07775 | 0        | 0        | 0        | 0.824831 | 1.987402 | 0        | 0.889303 | 1.07889  | 0.976246 | 0        | 2.660668 | 0        | 0.481321 | NA       | 0.462704 | NA       | 0.375791 | NA       | NA       | NA |
| AT2G07776 | AT2G07776 | 2.377808 | 1.784246 | 1.287654 | 2.062078 | 2.649869 | 0.996841 | 0.778607 | 6.47334  | 0.976246 | 0.959536 | 2.660668 | 1.035907 | 0.040234 | 0.963026 | 0.373901 | 0.640631 | -0.13309 | NA       | NA       | NA |
| AT2G07777 | AT2G07777 | 21.40027 | 10.70548 | 9.01358  | 11.13522 | 13.24935 | 13.95577 | 10.67164 | 12.94668 | 20.50117 | 4.797678 | 10.64267 | 6.215439 | -0.11763 | 0.844524 | 0.065701 | 0.920981 | -0.79321 | NA       | NA       | NA |
| AT2G07778 | AT2G07778 | 0        | 0        | 0        | 0        | 0        | 0        | 0.889303 | 0        | 0        | 0        | 0        | 0        | 0        | NA       | 0.160764 | NA       | 0        | NA       | NA       | NA |
| AT2G07779 | AT2G07779 | 2.377808 | 0        | 0        | 2.474493 | 2.649869 | 3.987363 | 0        | 2.15778  | 3.904984 | 3.838143 | 2.660668 | 1.035907 | 0.704617 | 0.309241 | 0.382573 | 0.629847 | 0.552617 | NA       | NA       | NA |
| AT2G07780 | AT2G07780 | 0        | 0        | 0        | 0        | 0        | 0        | 0.889303 | 0        | 0        | 0        | 0        | 0        | 0        | NA       | 0.160764 | NA       | 0        | NA       | NA       | NA |
| AT2G07783 | AT2G07783 | 53.50068 | 35.68492 | 42.49259 | 63.512   | 77.50867 | 34.88943 | 28.45771 | 17.26224 | 79.07593 | 47.01725 | 54.54369 | 38.32854 | 0.368576 | 0.446307 | -0.07337 | 0.902384 | 0.064379 | 0.955245 | NA       | NA |
| AT2G07784 | AT2G07784 | 2.377808 | 0        | 0        | 1.237247 | 0        | 0        | 0        | 0        | 0        | 0        | 0        | 0        | -0.13354 | NA       | -0.33989 | NA       | -0.03994 | NA       | NA       | NA |
| AT2G07785 | AT2G07785 | 9.511232 | 3.568492 | 2.575309 | 2.062078 | 0.662467 | 2.990522 | 4.446517 | 2.15778  | 3.904984 | 0.959536 | 1.330334 | 2.071813 | -0.36398 | 0.176866 | 0.363998 | 0.646625 | -0.53627 | NA       | NA       | NA |
| AT2G07786 | AT2G07786 | 0        | 3.568492 | 1.287654 | 3.71174  | 4.299738 | 1.993682 | 3.557214 | 3.23667  | 3.904984 | 1.919071 | 2.660668 | 4.143626 | 0.703318 | 0.350185 | 0.636297 | 0.389176 | 0.450344 | NA       | NA       | NA |
| AT2G07787 | AT2G07787 | 3.566712 | 0        | 6.438272 | 4.536571 | 5.962205 | 1.993682 | 3.557214 | 2.15778  | 1.952492 | 3.838143 | 2.660668 | 1.035907 | 0.200422 | 0.800187 | -0.26035 | 0.753912 | -0.272   | NA       | NA       | NA |
| AT2G07788 | AT2G07788 | 0        | 0        | 0        | 0        | 0        | 0        | 0        | 0        | 0.976246 | 0        | 0        | 0        | 0        | NA       | 0.16673  | NA       | 0        | NA       | NA       | NA |
| AT2G07789 | AT2G07789 | 0        | 0        | 0        | 0        | 0        | 0        | 0        | 0        | 0        | 0        | 0        | 0        | #N/A     | #N/A     | #N/A     | #N/A     | #N/A     | #N/A     | #N/A     | NA |
| AT2G07790 | AT2G07790 | 0        | 0        | 0        | 0        | 0        | 0        | 1.07889  | 0        | 0        | 0        | 0        | 0        | 0        | NA       | 0.16673  | NA       | 0        | NA       | NA       | NA |
| AT2G07791 | AT2G07791 | 0        | 0        | 0        | 0        | 0        | 0        | 0.889303 | 0        | 0        | 0        | 0        | 0        | 0        | NA       | 0.160764 | NA       | 0        | NA       | NA       | NA |
| AT2G07792 | AT2G07792 | 0        | 1.784246 | 0        | 0        | 0        | 0        | 0        | 0        | 0        | 0        | 0        | 0        | -0.2184  | NA       | -0.20558 | NA       | -0.19918 | NA       | NA       | NA |
| AT2G07793 | AT2G07793 | 0        | 0        | 0        | 0        | 0        | 0        | 0        | 0        | 0        | 0.959536 | 0        | 0        | 0        | NA       | 0        | NA       | 0.171512 | NA       | NA       | NA |
| AT2G07794 | AT2G07794 | 0        | 0        | 0        | 0.412416 | 0        | 0        | 0        | 0        | 0        | 0        | 0        | 0        | 0.095918 | NA       | 0        | NA       | 0        | NA       | NA       | NA |
| AT2G07795 | AT2G07795 | 1.188904 | 1.784246 | 0        | 0.412416 | 0        | 0        | 1.778607 | 0        | 0        | 0.959536 | 0        | 0        | -0.40882 | NA       | -0.12588 | NA       | -0.26952 | NA       | NA       | NA |
| AT2G07798 | AT2G07798 | 3.566712 | 3.568492 | 2.575309 | 2.474493 | 1.987402 | 5.981045 | 0.889303 | 5.39445  | 4.88123  | 4.797678 | 2.660668 | 1.035907 | 0.014691 | 0.986802 | 0.11001  | 0.899772 | -0.09569 | NA       | NA       | NA |
| AT2G07799 | AT2G07799 | 2.377808 | 1.784246 | 1.287654 | 0.412416 | 1.324935 | 0.996841 | 2.66791  | 1.07889  | 0.976246 | 0.959536 | 0        | 1.035907 | -0.43428 | 0.551017 | -0.06071 | 0.944463 | -0.48088 | NA       | NA       | NA |
| AT2G07806 | AT2G07806 | 1.188904 | 0        | 2.575309 | 1.649662 | 2.649869 | 0        | 0.889303 | 2.15778  | 1.952492 | 0.959536 | 3.991002 | 1.035907 | 0.0641   | 0.940708 | 0.111035 | 0.898199 | 0.199789 | NA       | NA       | NA |
| AT2G07807 | AT2G07807 | 0        | 0        | 0        | 0        | 0        | 0        | 0.996841 | 0.889303 | 0        | 0        | 0        | 0        | 0.133397 | NA       | 0.133015 | NA       | 0        | NA       | NA       | NA |
| AT2G07808 | AT2G07808 | 5.94452  | 5.352738 | 9.01358  | 3.299325 | 1.324935 | 2.990522 | 1.778607 | 4.31556  | 2.928738 | 3.838143 | 5.321336 | 9.323159 | -0.96662 | 0.117391 | -0.81081 | 0.227761 | -0.09638 | NA       | NA       | NA |
| AT2G07809 | AT2G07809 | 1.188904 | 0        | 0        | 0.412416 | 1.324935 | 0.996841 | 0        | 0        | 0        | 0        | 0        | 0        | 0.291684 | NA       | -0.26635 | NA       | -0.25383 | NA       | NA       | NA |
| AT2G0781  |           |          |          |          |          |          |          |          |          |          |          |          |          |          |          |          |          |          |          |          |    |











|           |           |          |          |          |          |          |          |          |          |          |          |          |          |          |          |           |           |          |          |    |
|-----------|-----------|----------|----------|----------|----------|----------|----------|----------|----------|----------|----------|----------|----------|----------|----------|-----------|-----------|----------|----------|----|
| AT2G13400 | AT2G13400 | 1.188904 | 0        | 0        | 0.412416 | 0.662467 | 0        | 0.889303 | 0        | 0        | 0        | 0        | 0        | 0        | -0.00593 | NA        | -0.05489  | NA       | -0.23354 | NA |
| AT2G13410 | AT2G13410 | 5.94452  | 0        | 2.575309 | 2.062078 | 0        | 2.990522 | 5.335821 | 4.31556  | 3.904984 | 1.919071 | 5.321336 | 1.035907 | -0.48012 | 0.513623 | 0.353483  | 0.659812  | -0.11039 | NA       |    |
| AT2G13420 | AT2G13420 | 20.21137 | 24.97944 | 28.3284  | 15.67179 | 14.57428 | 23.92418 | 19.56468 | 21.5778  | 17.57243 | 16.31211 | 11.97301 | 13.46678 | -0.42846 | 0.298211 | -0.28719  | 0.541822  | -0.7058  | 0.256453 |    |
| AT2G13422 | AT2G13422 | 0        | 0        | 1.287654 | 0        | 0.662467 | 1.993682 | 0        | 0        | 0        | 0        | 0        | 1.035907 | 0.191603 | NA       | -0.24645  | NA        | -0.04338 | NA       |    |
| AT2G13430 | AT2G13430 | 0        | 1.784246 | 0        | 0        | 0.662467 | 0.996841 | 0        | 0        | 0        | 0        | 0        | 0        | 0.034784 | NA       | -0.2741   | NA        | -0.26587 | NA       |    |
| AT2G13431 | AT2G13431 | 1.188904 | 0        | 2.575309 | 0        | 1.324935 | 0.996841 | 1.778607 | 0        | 0.976246 | 4.797678 | 3.991002 | 0        | -0.29841 | 0.686567 | -0.15717  | 0.848634  | 0.491063 | NA       |    |
| AT2G13440 | AT2G13440 | 441.0834 | 335.4383 | 387.584  | 258.5846 | 252.4    | 253.1976 | 276.5734 | 294.537  | 289.9451 | 332.9589 | 320.6105 | 334.5978 | -0.60677 | 5.556-06 | -0.43843  | 0.002068  | -0.24041 | 0.282188 |    |
| AT2G13450 | AT2G13450 | 1.188904 | 0        | 2.575309 | 0        | 1.987402 | 1.993682 | 1.778607 | 0        | 0.976246 | 0        | 0        | 0        | -0.13562 | 0.984612 | -0.13833  | 0.860316  | -0.23427 | NA       |    |
| AT2G13460 | AT2G13460 | 0        | 1.784246 | 0        | 0        | 0        | 0.996841 | 0.889303 | 0        | 0        | 0        | 1.330334 | 0        | -0.11867 | NA       | -0.0954   | NA        | -0.048   | NA       |    |
| AT2G13463 | AT2G13463 | 0        | 0        | 0        | 0        | 0        | 0        | 0        | 0        | 0        | 0        | 1.330334 | 1.035907 | 0        | NA       | 0         | NA        | 0.375122 | NA       |    |
| AT2G13469 | AT2G13469 | 0        | 0        | 0        | 0        | 0        | 0        | 0        | 0        | 0        | 0        | 0        | 0        | #N/A     | #N/A     | #N/A      | #N/A      | #N/A     | #N/A     |    |
| AT2G13470 | AT2G13470 | 0        | 0        | 0        | 0        | 0        | 0        | 0        | 0        | 0.959536 | 0        | 1.035907 | 0        | 0        | NA       | 0         | NA        | 0.332992 | NA       |    |
| AT2G13480 | AT2G13480 | 0        | 0        | 0        | 0        | 0        | 0        | 0        | 1.07889  | 0        | 0        | 0        | 0        | 0        | NA       | 0.16673   | NA        | 0        | NA       |    |
| AT2G13490 | AT2G13490 | 0        | 0        | 0        | 0        | 0.662467 | 0        | 0        | 0        | 0        | 0        | 2.660668 | 1.035907 | 0.093579 | NA       | 0         | NA        | 0.54659  | NA       |    |
| AT2G13500 | AT2G13500 | 0        | 0        | 0        | 0        | 0        | 0        | 1.07889  | 0        | 0        | 1.330334 | 0        | 0        | 0        | NA       | 0.160793  | NA        | 0.184979 | NA       |    |
| AT2G13510 | AT2G13510 | 0        | 0        | 0        | 0        | 0        | 0        | 0        | 0        | 0        | 0        | 0        | 0        | #N/A     | #N/A     | #N/A      | #N/A      | #N/A     | #N/A     |    |
| AT2G13520 | AT2G13520 | 2.377808 | 3.568492 | 0        | 0        | 2.649869 | 0        | 0        | 0        | 0        | 0        | 0        | 0        | -0.29504 | NA       | -0.71843  | NA        | -0.70447 | NA       |    |
| AT2G13530 | AT2G13530 | 1.188904 | 0        | 0        | 0        | 0        | 0        | 0.889303 | 0        | 0        | 0        | 0        | 0        | -0.20902 | NA       | -0.03919  | NA        | -0.19148 | NA       |    |
| AT2G13540 | AH1       | 470.806  | 417.5136 | 419.7753 | 355.0898 | 320.6342 | 365.8406 | 394.8507 | 391.637  | 260.6577 | 405.8836 | 397.7699 | 402.9676 | -0.32506 | 0.069715 | -0.31652  | 0.093671  | -0.11563 | 0.744238 |    |
| AT2G13542 | AT2G13542 | 0        | 0        | 0        | 0        | 0        | 0        | 0        | 0        | 0        | 0        | 0        | 0        | #N/A     | #N/A     | #N/A      | #N/A      | #N/A     | #N/A     |    |
| AT2G13547 | AT2G13547 | 0        | 0        | 0        | 0        | 0        | 0.996841 | 0        | 0        | 0.976246 | 0        | 0        | 0        | 0.133781 | NA       | 0.142196  | NA        | 0        | NA       |    |
| AT2G13550 | AT2G13550 | 52.31177 | 35.68492 | 45.0679  | 32.16841 | 39.08557 | 35.88627 | 23.21189 | 23.73558 | 18.23118 | 19.95501 | 38.32854 | -0.30947 | 0.389786 | -0.8649  | 0.1013074 | -0.74449  | 0.13032  | 0.075062 |    |
| AT2G13560 | NAD-ME1   | 1209.115 | 1282.873 | 1130.561 | 1204.666 | 1096.383 | 1259.01  | 1047.6   | 1197.568 | 1172.471 | 916.3565 | 838.1104 | 1094.953 | -0.02427 | 0.895174 | -0.08236  | 0.637767  | -0.33958 | 0.075062 |    |
| AT2G13570 | NYF87     | 5.94452  | 1.784246 | 6.438272 | 1.649662 | 2.649869 | 0        | 4.446517 | 2.15778  | 0        | 7.676285 | 5.321336 | 4.143626 | -0.95104 | 0.150343 | -0.65041  | 0.375941  | 0.174659 | NA       |    |
| AT2G13580 | AT2G13580 | 9.511232 | 12.48972 | 6.438272 | 6.598649 | 6.624673 | 5.981045 | 7.114428 | 5.39445  | 8.786214 | 6.635821 | 6.65167  | 8.287252 | -0.42074 | 0.470685 | -0.29851  | 0.651047  | -0.17719 | NA       |    |
| AT2G13590 | AT2G13590 | 0        | 1.784246 | 0        | 0        | 0.662467 | 0        | 0        | 0        | 0        | 0        | 0        | 0        | -0.12017 | NA       | -0.24312  | NA        | -0.23848 | NA       |    |
| AT2G13600 | PCMP-E76  | 38.04493 | 42.8219  | 51.50617 | 40.41673 | 36.4357  | 42.86415 | 35.57214 | 46.39227 | 44.90732 | 35.50282 | 19.95501 | 32.1131  | -0.13905 | 0.699009 | -0.0609   | 0.88444   | -0.53214 | 0.278295 |    |
| AT2G13610 | ABC65     | 162.8798 | 173.0719 | 177.6963 | 95.68041 | 93.40789 | 114.6367 | 109.3843 | 117.599  | 129.8407 | 149.6876 | 175.6041 | 161.6014 | -0.75501 | 1.06E-05 | -0.51405  | 0.005517  | -0.07839 | 0.84833  |    |
| AT2G13620 | CHX15     | 0        | 0        | 0        | 0        | 0        | 0        | 0        | 1.07889  | 0        | 0        | 0        | 0        | 0        | NA       | 0.16673   | NA        | 0        | NA       |    |
| AT2G13623 | AT2G13623 | 0        | 0        | 0        | 0        | 0        | 0        | 0        | 0        | 0        | 0        | 0        | 0        | #N/A     | #N/A     | #N/A      | #N/A      | #N/A     | #N/A     |    |
| AT2G13630 | AT2G13630 | 0        | 0        | 0        | 0        | 0.662467 | 0        | 0        | 0        | 0        | 0        | 0        | 0        | 0.128567 | NA       | 0         | NA        | 0        | NA       |    |
| AT2G13640 | AT2G13640 | 0        | 0        | 0        | 0        | 0        | 0        | 0        | 0        | 0        | 0        | 0        | 0        | #N/A     | #N/A     | #N/A      | #N/A      | #N/A     | #N/A     |    |
| AT2G13650 | GONST1    | 146.2352 | 132.0342 | 173.8333 | 225.1789 | 231.2011 | 247.2165 | 196.5361 | 194.2002 | 174.748  | 105.5489 | 143.6761 | 96.33931 | 0.614713 | 0.000684 | 0.308287  | 0.1411399 | -0.39795 | 0.181158 |    |
| AT2G13660 | AT2G13660 | 0        | 0        | 0        | 0        | 0.662467 | 0        | 0        | 0        | 0        | 0        | 0        | 0        | 0.098893 | NA       | 0         | NA        | 0.150283 | NA       |    |
| AT2G13665 | AT2G13665 | 2.377808 | 0        | 0        | 2.886909 | 2.649869 | 4.984204 | 1.778607 | 3.23667  | 2.928738 | 3.838143 | 0        | 4.143626 | 0.820639 | 0.227829 | 0.582022  | 0.439233  | 0.630005 | NA       |    |
| AT2G13680 | CALL5     | 15.45575 | 5.352738 | 6.438272 | 2.062078 | 5.962205 | 2.990522 | 5.335821 | 1.07889  | 2.928738 | 16.31211 | 10.64267 | 10.35907 | -1.00383 | 0.085841 | -1.06818  | 0.084341  | 0.35292  | NA       |    |
| AT2G13690 | PR11-IFG  | 92.73451 | 78.50683 | 82.40988 | 70.52306 | 60.28452 | 62.80097 | 56.91542 | 61.49673 | 69.31347 | 94.03449 | 87.80204 | 80.80071 | -0.37526 | 0.103121 | -0.42848  | 0.081791  | 0.043059 | 0.940043 |    |
| AT2G13700 | AT2G13700 | 0        | 0        | 0        | 0        | 0        | 0        | 0        | 0        | 0        | 0        | 0        | 0        | #N/A     | #N/A     | #N/A      | #N/A      | #N/A     | #N/A     |    |
| AT2G13705 | AT2G13705 | 0        | 0        | 0        | 0        | 0        | 0        | 0        | 0        | 0        | 0        | 0        | 0        | #N/A     | #N/A     | #N/A      | #N/A      | #N/A     | #N/A     |    |
| AT2G13706 | AT2G13706 | 0        | 0        | 0        | 0        | 0        | 0        | 0        | 0        | 0        | 0        | 0        | 0        | #N/A     | #N/A     | #N/A      | #N/A      | #N/A     | #N/A     |    |
| AT2G13710 | AT2G13710 | 0        | 0        | 0        | 0        | 0        | 0        | 0        | 0        | 0        | 0        | 0        | 0        | #N/A     | #N/A     | #N/A      | #N/A      | #N/A     | #N/A     |    |
| AT2G13720 | AT2G13720 | 0        | 0        | 0        | 0        | 0        | 0        | 0        | 0        | 0        | 0        | 0        | 0        | #N/A     | #N/A     | #N/A      | #N/A      | #N/A     | #N/A     |    |
| AT2G13730 | AT2G13730 | 0        | 0        | 0        | 0        | 0        | 0        | 0        | 0        | 0        | 0        | 0        | 0        | #N/A     | #N/A     | #N/A      | #N/A      | #N/A     | #N/A     |    |
| AT2G13740 | AT2G13740 | 0        | 1.784246 | 0        | 0        | 0        | 0        | 0        | 0        | 0.959536 | 1.330334 | 0        | 0        | -0.3228  | NA       | -0.28766  | NA        | 0.130533 | NA       |    |
| AT2G13750 | AT2G13750 | 0        | 0        | 0        | 0        | 0.662467 | 0        | 0.889303 | 2.15778  | 0        | 0.959536 | 0        | 0        | 0.080684 | NA       | 0.481986  | NA        | 0.164505 | NA       |    |
| AT2G13760 | AT2G13760 | 1.188904 | 1.784246 | 0        | 5.361402 | 3.312336 | 1.993682 | 0        | 1.07889  | 1.952492 | 0.959536 | 0        | 0        | 0.97033  | 0.137837 | -0.00092  | 0.999026  | -0.31204 | NA       |    |
| AT2G13770 | AT2G13770 | 1.188904 | 0        | 1.287654 | 0.412416 | 0        | 0.996841 | 0        | 0        | 0        | 0        | 1.330334 | 0        | -0.20118 | NA       | -0.48194  | NA        | -0.22811 | NA       |    |
| AT2G13790 | SERK4     | 422.0609 | 519.2156 | 437.8025 | 819.4667 | 732.6888 | 971.9198 | 562.0398 | 641.9395 | 489.0992 | 325.2826 | 280.7005 | 299.377  | 0.859408 | 4.23E-08 | 0.294051  | 0.109496  | -0.58855 | 0.005202 |    |
| AT2G13800 | SERK5     | 217.5694 | 246.226  | 263.9691 | 447.4709 | 389.5308 | 418.6731 | 281.9092 | 292.3792 | 303.6125 | 154.4852 | 162.3007 | 175.0682 | 0.78191  | 1.35E-08 | 0.268685  | 0.10242   | -0.55341 | 0.004319 |    |
| AT2G13810 | ALD1      | 14.26685 | 16.05821 | 23.17778 | 52.37678 | 41.07297 | 49.84204 | 182.3072 | 141.3346 | 129.8407 | 10.55489 | 13.30334 | 14.50269 | 1.294262 | 3.84E-05 | 2.898098  | 2.00E-23  | -0.43239 | 0.526159 |    |
| AT2G13820 | AT2G13820 | 123.646  | 51.74313 | 104.3    | 54.02644 | 51.67245 | 39.87365 | 26.6791  | 30.20892 | 61.5035  | 103.6298 | 111.7481 | 89.08766 | -0.15789 | 0.007741 | -0.17897  | 0.000558  | 0.097478 | 0.89957  |    |
| AT2G13830 | AT2G13830 | 0        | 0        | 0        | 0        | 0        | 0        | 0        | 0        | 0        | 0        | 0        | 0        | #N/A     | #N/A     | #N/A      | #N/A      | #N/A     | #N/A     |    |
| AT2G13840 | AT2G13840 | 74.90095 | 92.78079 | 70.82099 | 80.00862 | 87.44568 | 75.7599  | 76.4801  | 76.60119 | 72.2422  | 70.0461  | 66.5167  | 75.62118 | 0.047007 | 0.868168 | -0.06421  | 0.834742  | -0.14454 | 0.757425 |    |
| AT2G13850 | AT2G13850 | 0        | 0        | 0        | 0        | 0        | 0        | 0        | 0        | 0        | 0        | 0        | 0        | #N/A     | #N/A     | #N/A      | #N/A      | #N/A     | #N/A     |    |
| AT2G13851 | AT2G13851 | 0        | 0        | 0        | 0        | 0        | 0        | 0        | 0        | 0        | 0        | 0        | 0        | #N/A     | #N/A     | #N/A      | #N/A      | #N/A     | #N/A     |    |
| AT2G13860 | AT2G13860 | 0        | 0        | 0        | 0        | 0        | 0.889303 | 0        | 0        | 0        | 0        | 0        | 0        | 0        | NA       | 0.160764  | NA        | 0        | NA       |    |
| AT2G13865 | AT2G13865 | 0        | 0        | 0        | 0        | 0        | 0        | 0        | 0        | 0        | 0        | 0        | 0        | #N/A     | #N/A     | #N/A      | #N/A      | #N/A     | #N/A     |    |
| AT2G13870 | AT2G13870 | 0        | 0        | 0        | 0        | 0        | 0.889303 | 0        | 0        | 0        | 0        | 0        | 0        | 0        | NA       | 0.160764  | NA        | 0        | NA       |    |
| AT2G13890 | AT2G13890 | 0        | 0        | 0        | 0        | 0        | 0.889303 | 1.07889  | 0        | 0        | 0        | 0        | 0        | 0        | NA       | 0.3225    | NA        | 0        | NA       |    |
| AT2G13895 | AT2G13895 | 0        | 0        | 0        | 0        | 0        | 0        | 0        | 0        | 0        | 0        | 0        | 0        | #N/A     | #N/A     | #N/A      | #N/A      | #N/A     | #N/A     |    |
| AT2G13900 | AT2G13900 | 0        | 1.784246 | 0        | 0.412416 | 0.662467 | 0        | 0        | 0        | 0        | 0        | 0        | 1.035907 | -0.04598 | NA       | -0.28771  | NA        | -0.07023 | NA       |    |
| AT2G13910 | AT2G13910 | 0        | 0        | 0        | 0.412416 | 1.987402 | 0        | 0.889303 | 1.07889  | 0        | 0        | 0        | 1.035907 | 0.425012 | NA       | 0.321097  | NA        | 0.16824  | NA       |    |
| AT2G13920 | AT2G13920 | 1.188904 | 0        | 0        | 0        | 0        | 0.889303 | 0        | 0        | 0        | 0        | 0        | 0        | -0.20902 | NA       | -0.03919  | NA        | -0.19148 | NA       |    |
| AT2G13930 | AT2G13930 | 0        | 0        | 0        | 0        | 0.662467 | 0        | 0.889303 | 2.15778  | 0        | 0        | 2.660668 | 0        | 0.061635 | NA       | 0.445724  | NA        | 0.360852 | NA       |    |
| AT2G13940 | AT2G13940 | 0        | 1.784246 | 0        | 0        | 0        | 0.996841 | 0        | 0        | 0        |          |          |          |          |          |           |           |          |          |    |





|           |           |          |          |          |           |          |          |          |          |          |          |          |          |          |           |          |           |          |          |
|-----------|-----------|----------|----------|----------|-----------|----------|----------|----------|----------|----------|----------|----------|----------|----------|-----------|----------|-----------|----------|----------|
| AT2G15890 | MEE14     | 1891.546 | 2738.818 | 2388.599 | 3656.476  | 4724.717 | 4451.891 | 8914.378 | 8421.815 | 10854.88 | 2680.943 | 3081.053 | 2864.282 | 0.854505 | 1.61E-07  | 1.969036 | 1.15E-36  | 0.292491 | 0.283289 |
| AT2G15900 | AT2G15900 | 316.2484 | 289.0479 | 311.6124 | 195.8974  | 202.715  | 282.1059 | 352.1642 | 346.3237 | 191.3442 | 286.9012 | 264.7365 | 255.8689 | -0.42332 | 0.08154   | -0.04291 | 0.895829  | -0.17753 | 0.69981  |
| AT2G15910 | AT2G15910 | 205.6804 | 196.2671 | 231.7778 | 446.2337  | 436.5659 | 348.8943 | 299.6953 | 296.6947 | 482.2655 | 257.1555 | 309.9678 | 252.7612 | 0.930244 | 6.8E-06   | 0.740781 | 0.000592  | 0.353865 | 0.314301 |
| AT2G15920 | AT2G15920 | 0        | 1.784246 | 0        | 0         | 0        | 0        | 0.889303 | 3.23667  | 0        | 0        | 0        | 2.071813 | -0.33034 | NA        | 0.34173  | NA        | 0.082421 | NA       |
| AT2G15930 | AT2G15930 | 0        | 0        | 0        | 0         | 0        | 0        | 0        | 0        | 0        | 0        | 0        | 0        | #N/A     | #N/A      | #N/A     | #N/A      | #N/A     | #N/A     |
| AT2G15940 | AT2G15940 | 2.377808 | 3.568492 | 1.287654 | 3.71174   | 3.974804 | 7.974726 | 1.778607 | 1.07889  | 0.976246 | 0.959536 | 1.330334 | 2.071813 | 0.753882 | 0.268447  | -0.40283 | 0.613095  | -0.32169 | NA       |
| AT2G15950 | AT2G15950 | 0        | 0        | 0        | 0         | 0        | 0        | 0        | 0        | 0        | 0        | 0        | 0        | #N/A     | #N/A      | #N/A     | #N/A      | #N/A     | #N/A     |
| AT2G15960 | AT2G15960 | 706.2089 | 620.9176 | 745.5519 | 1308.595  | 1427.617 | 1117.459 | 1904.888 | 1360.48  | 3249.923 | 882.7728 | 1532.545 | 1199.58  | 0.847815 | 0.001858  | 1.56789  | 1.41E-09  | 0.758984 | 0.037456 |
| AT2G15970 | COR413PM1 | 1712.022 | 1721.797 | 1703.567 | 1279.726  | 1413.043 | 1132.411 | 1408.657 | 1262.301 | 1850.962 | 1994.875 | 2435.841 | 1779.687 | -0.41623 | 0.019494  | -0.18019 | 0.387991  | 0.267626 | 0.347575 |
| AT2G15980 | AT2G15980 | 73.71204 | 42.8219  | 39.91728 | 46.19054  | 42.39791 | 23.92418 | 33.79353 | 37.76115 | 47.83605 | 30.70514 | 35.91902 | 38.32854 | -0.42436 | 0.232327  | -0.37653 | 0.331923  | -0.5486  | 0.310396 |
| AT2G15990 | AT2G15990 | 0        | 0        | 0        | 0         | 0        | 0        | 0        | 0        | 0        | 0        | 0        | 0        | #N/A     | #N/A      | #N/A     | #N/A      | #N/A     | #N/A     |
| AT2G16000 | AT2G16000 | 0        | 0        | 0        | 0         | 0        | 0        | 0        | 1.07889  | 0        | 0        | 1.330334 | 0        | 0        | NA        | 0.160793 | NA        | 0.184979 | NA       |
| AT2G16005 | AT2G16005 | 0        | 0        | 1.287654 | 0         | 0        | 0        | 0        | 0        | 0        | 1.919071 | 0        | 0        | -0.2242  | NA        | -0.20522 | NA        | 0.102493 | NA       |
| AT2G16010 | AT2G16010 | 0        | 0        | 0        | 0         | 0        | 0        | 0        | 0        | 0        | 0        | 0        | 0        | #N/A     | #N/A      | #N/A     | #N/A      | #N/A     | #N/A     |
| AT2G16015 | AT2G16015 | 0        | 0        | 0        | 0         | 0        | 0        | 0        | 0        | 0        | 0        | 0        | 0        | #N/A     | #N/A      | #N/A     | #N/A      | #N/A     | #N/A     |
| AT2G16016 | AT2G16016 | 0        | 0        | 0        | 0         | 0        | 0        | 0        | 0        | 0        | 0        | 0        | 0        | #N/A     | #N/A      | #N/A     | #N/A      | #N/A     | #N/A     |
| AT2G16018 | AT2G16018 | 0        | 0        | 0        | 0         | 0        | 0        | 0        | 0        | 0        | 0        | 0        | 0        | #N/A     | #N/A      | #N/A     | #N/A      | #N/A     | #N/A     |
| AT2G16019 | AT2G16019 | 0        | 0        | 0        | 0         | 0        | 0        | 0        | 0        | 0        | 0        | 0        | 0        | #N/A     | #N/A      | #N/A     | #N/A      | #N/A     | #N/A     |
| AT2G16020 | AT2G16020 | 0        | 0        | 0        | 0         | 0        | 0        | 0        | 0        | 0        | 0        | 0        | 0        | #N/A     | #N/A      | #N/A     | #N/A      | #N/A     | #N/A     |
| AT2G16030 | AT2G16030 | 0        | 0        | 0        | 0.412416  | 0        | 0        | 0        | 0        | 0        | 0        | 0        | 0        | 0.095918 | NA        | 0        | NA        | 0        | NA       |
| AT2G16040 | AT2G16040 | 0        | 0        | 0        | 0         | 0        | 0        | 0        | 0        | 0.976246 | 0        | 0        | 0        | 0        | 0         | 0.16673  | NA        | 0        | NA       |
| AT2G16050 | AT2G16050 | 52.31177 | 39.25341 | 38.62963 | 71.76031  | 72.20893 | 48.8452  | 55.13682 | 40.99782 | 51.74104 | 51.81492 | 63.85603 | 44.54398 | 0.545043 | 0.060515  | 0.165006 | 0.659701  | 0.259373 | 0.639672 |
| AT2G16060 | AHB1      | 29.7226  | 48.17464 | 50.21852 | 97.33008  | 94.73282 | 105.6651 | 34.68284 | 29.13003 | 35.14486 | 29.7456  | 27.93701 | 55.93895 | 1.169734 | 3.46E-05  | -0.33018 | 0.380359  | -0.13792 | 0.849161 |
| AT2G16070 | PDV2      | 326.9486 | 303.3218 | 325.7765 | 259.8218  | 261.0121 | 234.2576 | 160.9639 | 194.2002 | 257.7289 | 327.2016 | 364.5115 | 332.526  | -0.33224 | 0.070439  | -0.63147 | 0.000409  | 0.093944 | 0.805282 |
| AT2G16080 | AT2G16080 | 0        | 0        | 0        | 0         | 0        | 0        | 0        | 0        | 0        | 0        | 0        | 0        | 0        | 0         | 0        | 0         | 0        | 0        |
| AT2G16090 | ARI2      | 148.613  | 121.3287 | 123.6148 | 124.1371  | 106.6572 | 113.6398 | 124.5025 | 104.6523 | 119.102  | 114.1847 | 119.7301 | 121.2011 | -0.1896  | 0.365393  | -0.17663 | 0.443356  | -0.15347 | 0.684244 |
| AT2G16100 | AT2G16100 | 0        | 1.784246 | 0        | 0         | 0        | 0        | 0        | 0        | 0        | 0        | 0        | 0        | -0.2184  | NA        | -0.20558 | NA        | -0.19918 | NA       |
| AT2G16110 | AT2G16110 | 0        | 0        | 0        | 0         | 0        | 0        | 0        | 0        | 0        | 0        | 0        | 0        | #N/A     | #N/A      | #N/A     | #N/A      | #N/A     | #N/A     |
| AT2G16120 | PLT1      | 0        | 0        | 0        | 0         | 0        | 0        | 0        | 0        | 1.07889  | 0        | 0        | 0        | 0        | NA        | 0.16673  | NA        | 0        | NA       |
| AT2G16130 | PLT2      | 1.188904 | 0        | 0        | 0         | 0        | 0        | 0        | 0        | 0        | 0        | 1.330334 | 0        | -0.22006 | NA        | -0.20393 | NA        | 0.001199 | NA       |
| AT2G16140 | AT2G16140 | 7.133424 | 7.136984 | 5.150617 | 3.71174   | 5.962205 | 2.990522 | 8.893035 | 2.15778  | 1.952492 | 10.55489 | 7.982004 | 9.323159 | -0.43572 | 0.508451  | -0.37385 | 0.605117  | 0.419373 | NA       |
| AT2G16145 | MIR416    | 0        | 0        | 0        | 0         | 0        | 0        | 0        | 0        | 0        | 0        | 1.330334 | 0        | 0        | NA        | 0        | NA        | 0.172362 | NA       |
| AT2G16150 | AT2G16150 | 0        | 0        | 1.287654 | 0.412416  | 0        | 0        | 0        | 0        | 0.976246 | 1.919071 | 3.991002 | 0        | -0.22046 | NA        | -0.08101 | NA        | 0.590175 | NA       |
| AT2G16160 | AT2G16160 | 0        | 0        | 0        | 0         | 0        | 0        | 0        | 0        | 0        | 0        | 0        | 0        | #N/A     | #N/A      | #N/A     | #N/A      | #N/A     | #N/A     |
| AT2G16170 | AT2G16170 | 0        | 0        | 0        | 0         | 0        | 0        | 0        | 0        | 0        | 0        | 0        | 0        | #N/A     | #N/A      | #N/A     | #N/A      | #N/A     | #N/A     |
| AT2G16180 | AT2G16180 | 0        | 0        | 0        | 0         | 0        | 0        | 0        | 0        | 0        | 0        | 0        | 0        | #N/A     | #N/A      | #N/A     | #N/A      | #N/A     | #N/A     |
| AT2G16190 | AT2G16190 | 0        | 0        | 0        | 0.412416  | 0        | 0        | 0        | 0        | 0        | 0        | 0        | 0        | 0.095918 | NA        | 0        | NA        | 0        | NA       |
| AT2G16200 | AT2G16200 | 0        | 0        | 0        | 0         | 0        | 0        | 0        | 0        | 0        | 0        | 0        | 0        | #N/A     | #N/A      | #N/A     | #N/A      | #N/A     | #N/A     |
| AT2G16210 | AT2G16210 | 10.70014 | 7.136984 | 2.575309 | 0.824831  | 1.324935 | 1.993682 | 6.225124 | 7.55223  | 1.952492 | 8.635821 | 6.65167  | 9.323159 | -1.485   | 0.012953  | -0.2696  | 0.725114  | 0.225797 | NA       |
| AT2G16220 | AT2G16220 | 1.188904 | 1.784246 | 0        | 0         | 0        | 0        | 0        | 0        | 0        | 0        | 0        | 0        | -0.52101 | NA        | -0.48526 | NA        | -0.26349 | NA       |
| AT2G16225 | AT2G16225 | 0        | 0        | 0        | 0         | 0        | 0        | 0        | 0        | 0        | 0        | 0        | 0        | #N/A     | #N/A      | #N/A     | #N/A      | #N/A     | #N/A     |
| AT2G16230 | AT2G16230 | 0        | 0        | 0        | 0         | 0        | 0        | 0        | 0        | 0        | 0        | 1.330334 | 0        | 0        | NA        | 0        | NA        | 0.172362 | NA       |
| AT2G16240 | AT2G16240 | 0        | 0        | 0        | 0         | 0        | 0        | 0        | 0        | 0        | 0        | 0        | 0        | #N/A     | #N/A      | #N/A     | #N/A      | #N/A     | #N/A     |
| AT2G16245 | AT2G16245 | 0        | 0        | 2.575309 | 0.412416  | 1.324935 | 0        | 1.07889  | 0.976246 | 0        | 1.330334 | 0        | 0        | -0.12641 | NA        | -0.09115 | NA        | -0.22444 | NA       |
| AT2G16250 | AT2G16250 | 116.5126 | 132.0342 | 99.14938 | 52.37678  | 47.03518 | 88.71883 | 81.81592 | 96.0212  | 40.02609 | 108.4275 | 89.13238 | 83.90843 | -0.8444  | 0.006564  | -0.62766 | 0.061056  | -0.27856 | 0.635812 |
| AT2G16260 | GR-RBP1   | 0        | 0        | 0        | 0.412416  | 0        | 0        | 0        | 0        | 0.959536 | 1.330334 | 0        | 0        | 0.073643 | NA        | 0        | NA        | 0.380623 | NA       |
| AT2G16270 | AT2G16270 | 91.5456  | 82.07532 | 77.25926 | 108.0529  | 87.44568 | 119.6209 | 97.82338 | 110.0468 | 67.36097 | 104.5894 | 115.7391 | 108.7702 | 0.308438 | 0.22281   | 0.122714 | 0.692185  | 0.371393 | 0.332992 |
| AT2G16280 | KCS9      | 1185.337 | 1295.363 | 1250.312 | 871.0217  | 948.6531 | 1133.408 | 950.6654 | 1007.683 | 1060.203 | 1084.275 | 1136.105 | 1204.759 | -0.33674 | 0.010106  | -0.30161 | 0.028014  | -0.12116 | 0.621889 |
| AT2G16290 | AT2G16290 | 1.188904 | 0        | 0        | 0         | 0        | 0        | 0        | 0        | 0        | 0        | 0        | 0        | -0.2184  | NA        | -0.20558 | NA        | -0.19918 | NA       |
| AT2G16300 | AT2G16300 | 0        | 0        | 0        | 0         | 0        | 0        | 0.889303 | 0        | 0        | 0        | 0        | 0        | 0        | NA        | 0.160793 | NA        | 0        | NA       |
| AT2G16310 | AT2G16310 | 0        | 1.784246 | 0        | 0         | 0        | 0        | 1.778607 | 1.07889  | 1.952492 | 0        | 2.660668 | 0        | -0.39819 | NA        | 0.499255 | NA        | 0.137219 | NA       |
| AT2G16320 | AT2G16320 | 0        | 0        | 0        | 0         | 0        | 0        | 0.889303 | 0        | 0        | 0        | 0        | 0        | 0        | NA        | 0.137906 | NA        | 0.15538  | NA       |
| AT2G16330 | AT2G16330 | 0        | 0        | 0        | 0         | 0        | 0        | 0        | 0        | 0        | 0        | 0        | 0        | #N/A     | #N/A      | #N/A     | #N/A      | #N/A     | #N/A     |
| AT2G16340 | AT2G16340 | 0        | 0        | 0        | 0         | 0        | 0        | 0        | 1.07889  | 0        | 0        | 0        | 0        | 0        | NA        | 0.16673  | NA        | 0.463036 | NA       |
| AT2G16360 | AT2G16360 | 26.15589 | 46.3904  | 46.35556 | 116.3012  | 88.77061 | 56.81992 | 25.7898  | 35.60337 | 39.04984 | 68.12703 | 133.0334 | 18.64632 | 0.887881 | 0.112957  | -0.18151 | 0.804086  | 0.676876 | 0.463036 |
| AT2G16365 | AT2G16365 | 386.3938 | 485.3149 | 401.7482 | 770.3923  | 840.671  | 842.3305 | 1334.845 | 1180.306 | 1027.987 | 543.0972 | 585.3469 | 526.2405 | 0.937132 | 9.66E-12  | 1.462384 | 1.48E-27  | 0.376487 | 0.070669 |
| AT2G16367 | AT2G16367 | 3.566712 | 1.784246 | 1.287654 | 2.886909  | 3.974804 | 2.990522 | 9.782338 | 7.55223  | 15.61994 | 1.919071 | 3.991002 | 6.215439 | 0.217203 | 0.776609  | 1.548014 | 0.009938  | 0.431953 | NA       |
| AT2G16370 | THY-1     | 342.4043 | 244.4417 | 281.9963 | 328.2828  | 345.8079 | 312.0112 | 360.1679 | 332.2981 | 265.5389 | 275.3867 | 284.6915 | 289.0179 | 0.172479 | 0.5386817 | 0.130601 | 0.5386817 | -0.04126 | 0.924232 |
| AT2G16380 | SFH7      | 297.226  | 405.0238 | 364.4062 | 248.6866  | 256.3748 | 292.0743 | 381.5112 | 440.1871 | 410.9996 | 293.6179 | 395.1092 | 336.6696 | -0.41143 | 0.017466  | 0.210461 | 0.283273  | -0.05405 | 0.894073 |
| AT2G16385 | AT2G16385 | 0        | 0        | 0        | 0.2062078 | 0.662467 | 0        | 2.66791  | 1.07889  | 0.976246 | 0        | 0        | 0        | 0.522115 | NA        | 0.737454 | NA        | 0        | NA       |
| AT2G16390 | DRD1      | 159.3131 | 123.113  | 121.0395 | 91.14384  | 69.55906 | 98.68724 | 77.3694  | 126.2301 | 79.07593 | 110.3466 | 107.7571 | 110.842  | -0.62347 | 0.009392  | -0.50592 | 0.05045   | -0.28821 | 0.50127  |
| AT2G16400 | BLH7      | 435.1388 | 378.2602 | 392.7346 | 396.3314  | 350.4452 | 415.6826 | 439.3159 | 460.686  | 430.5245 | 424.1147 | 462.9562 | 391.5727 | -0.05848 | 0.734966  | 0.1357   | 0.41029   | 0.076842 | 0.794533 |
| AT2G16405 | AT2G16405 | 259.1811 | 262.2842 | 229.2025 | 252.8107  | 250.4126 | 300.0491 | 346.8284 | 283.7481 | 212.8216 | 269.6295 | 290.0128 | 268.2998 | 0.092091 | 0.697627  | 0.167115 | 0.473536  | 0.138115 | 0.721811 |
| AT2G16410 | AT2G16410 | 0        |          |          |           |          |          |          |          |          |          |          |          |          |           |          |           |          |          |

|           |           |          |          |          |           |          |          |          |          |           |           |          |          |          |          |           |           |          |          |
|-----------|-----------|----------|----------|----------|-----------|----------|----------|----------|----------|-----------|-----------|----------|----------|----------|----------|-----------|-----------|----------|----------|
| AT2G16760 | AT2G16760 | 0        | 0        | 3.862963 | 0.824831  | 0        | 1.993682 | 2.66791  | 2.15778  | 0.976246  | 4.797678  | 5.321336 | 3.10772  | -0.30967 | 0.688107 | 0.202182  | 0.813158  | 0.870279 | NA       |
| AT2G16770 | b2IP23    | 72.52314 | 78.50683 | 93.99877 | 104.7536  | 102.02   | 87.72199 | 74.70149 | 80.91675 | 72.2422   | 82.52006  | 75.82904 | 92.19568 | 0.268524 | 0.248177 | -0.10449  | 0.722681  | 0.034876 | 0.953003 |
| AT2G16800 | MSI2      | 171.2022 | 174.8561 | 194.4358 | 204.1457  | 184.1659 | 196.3776 | 128.0597 | 176.938  | 160.1043  | 187.51094 | 182.2558 | 151.2424 | 0.112052 | 0.060085 | -0.2178   | 0.308872  | -0.05501 | 0.899711 |
| AT2G16790 | AT2G16790 | 29.7226  | 37.46917 | 32.19136 | 61.03751  | 65.58426 | 40.87047 | 74.70149 | 42.07671 | 82.98091  | 40.3005   | 59.86503 | 70.44164 | 0.713048 | 0.036258 | 0.941247  | 0.005658  | 0.7175   | 0.150432 |
| AT2G16800 | AT2G16800 | 304.3594 | 294.4006 | 258.8185 | 219.8175  | 222.589  | 239.2418 | 224.1045 | 261.0914 | 332.8999  | 245.6411  | 242.1208 | 236.1867 | -0.32744 | 0.06813  | -0.06701  | 0.757265  | -0.23875 | 0.424113 |
| AT2G16810 | FBX8      | 2.377808 | 0        | 0        | 0         | 0        | 0        | 0        | 0        | 0         | 0         | 0        | 0        | -0.32938 | NA       | -0.31889  | NA        | -0.31551 | NA       |
| AT2G16820 | AT2G16820 | 0        | 0        | 0        | 0         | 0        | 0        | 0        | 0        | 0         | 0         | 0        | 0        | #N/A     | #N/A     | #N/A      | #N/A      | #N/A     | #N/A     |
| AT2G16830 | AT2G16830 | 0        | 0        | 0        | 0         | 0        | 0        | 0        | 0        | 0         | 0         | 0        | 0        | #N/A     | #N/A     | #N/A      | #N/A      | #N/A     | #N/A     |
| AT2G16832 | AT2G16832 | 0        | 1.784246 | 0        | 0         | 0        | 0        | 0        | 0        | 0         | 0         | 0        | 0        | -0.2184  | NA       | -0.20558  | NA        | -0.19918 | NA       |
| AT2G16835 | AT2G16835 | 0        | 0        | 0        | 0         | 0        | 0        | 0        | 0.976246 | 0         | 0         | 0        | 0        | 0        | NA       | 0.16673   | NA        | 0        | NA       |
| AT2G16840 | AT2G16840 | 0        | 0        | 0        | 0         | 0        | 0        | 0        | 0        | 0         | 0         | 0        | 1.035907 | 0        | NA       | 0         | NA        | 0        | 0.172362 |
| AT2G16850 | PIP2-8    | 97.49012 | 82.07532 | 88.84815 | 100.6294  | 72.8714  | 84.73147 | 84.48383 | 93.86342 | 85.90965  | 111.3061  | 99.77505 | 96.33931 | -0.05041 | 0.858373 | -0.03176  | 0.919498  | 0.184542 | 0.663474 |
| AT2G16860 | AT2G16860 | 423.2498 | 462.1197 | 511.1988 | 568.3087  | 560.4473 | 499.4172 | 496.2313 | 507.0783 | 635.5361  | 489.3632  | 502.8662 | 483.7683 | 0.221628 | 0.157279 | 0.227928  | 0.166896  | 0.078519 | 0.80625  |
| AT2G16870 | AT2G16870 | 53.50068 | 49.95889 | 60.51975 | 88.25693  | 82.80841 | 99.68408 | 88.93035 | 55.02339 | 56.62227  | 28.78607  | 37.24935 | 45.57989 | 0.682183 | 0.011508 | 0.277874  | 0.400395  | -0.53028 | 0.246344 |
| AT2G16880 | AT2G16880 | 164.0687 | 135.6027 | 141.642  | 124.9619  | 139.7806 | 133.5767 | 149.403  | 151.0446 | 109.3396  | 148.7286  | 163.6311 | 177.14   | -0.15454 | 0.048109 | -0.11123  | 0.657201  | 0.13849  | 0.721879 |
| AT2G16881 | AT2G16881 | 0        | 0        | 0        | 0         | 0        | 0        | 0        | 0        | 0         | 0         | 0        | 1.330334 | 0        | NA       | 0         | NA        | 0        | 0.172362 |
| AT2G16890 | UGT90A1   | 27.34479 | 16.05821 | 18.02716 | 21.44561  | 18.54908 | 26.9147  | 11.56095 | 14.02557 | 14.64369  | 16.31211  | 14.63367 | 17.61041 | 0.078306 | 0.874995 | -0.56661  | 0.215225  | -0.31807 | 0.685051 |
| AT2G16895 | AT2G16895 | 1.188904 | 0        | 0        | 0.412416  | 0.662467 | 0.996841 | 0.889303 | 0        | 2.928738  | 1.919071  | 1.330334 | 0        | 0.067663 | 0.930634 | -0.384668 | 0.580067  | 0.289982 | NA       |
| AT2G16900 | AT2G16900 | 174.7689 | 157.0137 | 153.2309 | 170.74    | 169.5916 | 172.4535 | 210.7649 | 184.4902 | 227.4653  | 185.1904  | 222.1658 | 171.9605 | 0.074289 | 0.732248 | 0.352073  | 0.058104  | 0.241039 | 0.418112 |
| AT2G16905 | AT2G16905 | 0        | 0        | 0        | 0         | 0        | 0        | 0.889303 | 0        | 0         | 0         | 0        | 0        | 0        | NA       | 0         | NA        | 0        | 0        |
| AT2G16910 | AMS       | 7.133244 | 12.48972 | 14.1642  | 8.248311  | 5.299738 | 1.993682 | 2.66791  | 0        | 5.875476  | 26.867    | 18.62468 | 12.43088 | -0.76758 | 0.1819   | -1.32763  | 0.023111  | 0.675153 | 0        |
| AT2G16920 | UBC23     | 271.0701 | 283.6951 | 225.3395 | 150.9441  | 147.0677 | 157.5008 | 188.5323 | 201.7524 | 137.6507  | 223.5718  | 226.1568 | 236.1867 | -0.75881 | 8.63E-06 | -0.5489   | 0.002488  | -0.17776 | 0.590987 |
| AT2G16930 | AT2G16930 | 172.3911 | 251.5787 | 236.9284 | 362.5133  | 386.8809 | 329.9543 | 351.2749 | 318.2725 | 425.6433  | 268.67    | 271.3881 | 236.1867 | 0.702935 | 7.18E-05 | 0.721818  | 6.14E-05  | 0.233834 | 0.47565  |
| AT2G16940 | AT2G16940 | 1167.504 | 1079.469 | 1059.74  | 881.7445  | 830.734  | 875.2262 | 929.3221 | 896.5575 | 1072.894  | 1020.946  | 932.5641 | 1084.594 | -0.35119 | 0.00334  | -0.18873  | 0.162075  | -0.12054 | 0.591221 |
| AT2G16950 | TRN1      | 848.8774 | 658.3688 | 648.9778 | 477.5772  | 476.314  | 548.2624 | 554.0361 | 618.2039 | 452.0019  | 581.4786  | 569.3829 | 531.42   | -0.51755 | 0.001338 | -0.404473 | 0.0017875 | -0.35445 | 0.721879 |
| AT2G16955 | AT2G16955 | 0        | 0        | 0        | 0         | 0        | 0        | 0        | 0        | 0         | 0         | 0        | 0        | #N/A     | #N/A     | #N/A      | #N/A      | #N/A     | #N/A     |
| AT2G16960 | AT2G16960 | 0        | 0        | 0        | 0         | 0        | 0        | 1.07889  | 0        | 0.959536  | 1.330334  | 0        | 0        | 0        | NA       | 0         | NA        | 0.376568 | NA       |
| AT2G16970 | MEE15     | 0        | 0        | 0        | 0.412416  | 0        | 1.993682 | 0        | 0        | 0         | 0         | 0        | 0        | 0.374519 | NA       | 0         | NA        | 0        | NA       |
| AT2G16980 | AT2G16980 | 0        | 0        | 1.287654 | 0.412416  | 1.324935 | 0.996841 | 4.446517 | 2.15778  | 0.976246  | 2.878607  | 2.660668 | 1.035907 | 0.108241 | 0.895397 | 0.827351  | 0.23153   | 0.68951  | NA       |
| AT2G16990 | AT2G16990 | 71.33244 | 74.93833 | 97.86173 | 37.94223  | 37.70663 | 34.88943 | 48.02239 | 36.68226 | 22.45366  | 106.5085  | 67.84703 | 77.69299 | -0.17568 | 0.000122 | -1.11257  | 0.00015   | 0.052197 | 0.943411 |
| AT2G17000 | MSL7      | 0        | 0        | 0        | 0         | 0.662467 | 0        | 0        | 0        | 0         | 0.959536  | 1.330334 | 0        | 0.109173 | NA       | 0         | NA        | 0.37189  | NA       |
| AT2G17010 | AT2G17010 | 4.755616 | 0        | 1.287654 | 1.237247  | 0.662467 | 1.993682 | 3.557214 | 1.07889  | 1.952492  | 0.959536  | 2.660668 | 0        | -0.35147 | 0.643091 | 0.036553  | 0.967223  | -0.37446 | NA       |
| AT2G17020 | FB110     | 219.9472 | 240.8732 | 230.4901 | 239.6134  | 208.6772 | 245.2228 | 244.5585 | 264.328  | 234.299   | 222.6123  | 214.1838 | 223.7558 | 0.00677  | 0.973664 | 0.105455  | 0.576792  | -0.05958 | 0.866179 |
| AT2G17030 | SKIP23    | 84.41218 | 80.29107 | 91.42346 | 100.1217  | 121.2315 | 115.6335 | 116.9498 | 90.62675 | 121.0545  | 84.43914  | 75.82904 | 90.12387 | 0.372797 | 0.026057 | 0.346306  | 0.148149  | -0.03156 | 0.958266 |
| AT2G17033 | AT2G17033 | 520.7399 | 472.8252 | 485.4457 | 371.5864  | 349.7827 | 431.6321 | 498.0099 | 453.1338 | 405.1421  | 485.525   | 492.2236 | 486.8761 | -0.36253 | 0.00936  | -0.12461  | 0.462659  | -0.0162  | 0.965707 |
| AT2G17036 | AT2G17036 | 27.34479 | 24.97944 | 34.76667 | 10.31039  | 14.57428 | 17.94313 | 25.7898  | 21.5778  | 19.52492  | 21.10978  | 25.27635 | 27.96948 | -0.99311 | 0.006176 | -0.35085  | 0.417048  | -0.21955 | 0.771203 |
| AT2G17040 | anac036   | 219.9472 | 287.2636 | 278.1333 | 1428.6038 | 1312.348 | 1337.76  | 1202.338 | 1040.05  | 1085.5896 | 149.6786  | 155.6491 | 153.3142 | 2.356828 | 1.6E-77  | 2.065706  | 7.15E-59  | -0.75373 | 1.58E-05 |
| AT2G17043 | AT2G17043 | 0        | 0        | 0        | 0.412416  | 0        | 0        | 0        | 0        | 0         | 0         | 0        | 0        | 0.095918 | 0        | 0         | NA        | 0        | NA       |
| AT2G17050 | AT2G17050 | 3.566712 | 0        | 1.287654 | 2.886909  | 3.974804 | 0.996841 | 2.66791  | 2.15778  | 0.976246  | 0.959536  | 3.991002 | 0        | 0.321653 | 0.676557 | 0.058253  | 0.948171  | -0.08461 | NA       |
| AT2G17055 | AT2G17055 | 0        | 0        | 0        | 0.412416  | 0        | 0        | 0        | 0        | 0.976246  | 0.959536  | 0        | 0        | 0.06603  | NA       | 0.157107  | NA        | 0.160871 | NA       |
| AT2G17060 | AT2G17060 | 0        | 0        | 1.287654 | 0.824831  | 1.324935 | 0        | 2.66791  | 1.07889  | 0.976246  | 0.959536  | 0        | 1.035907 | 0.132017 | 0.860066 | 0.521386  | 0.444425  | 0.108316 | NA       |
| AT2G17064 | AT2G17064 | 0        | 0        | 0        | 0         | 0        | 0        | 0        | 0        | 0         | 0         | 0        | 0        | #N/A     | #N/A     | #N/A      | #N/A      | #N/A     | #N/A     |
| AT2G17070 | AT2G17070 | 0        | 0        | 0        | 0         | 0        | 0        | 0        | 0        | 0         | 0         | 0        | 0        | #N/A     | #N/A     | #N/A      | #N/A      | #N/A     | #N/A     |
| AT2G17080 | AT2G17080 | 0        | 0        | 0        | 0         | 0        | 0        | 0        | 1.07889  | 0         | 0         | 0        | 0        | 0        | NA       | 0.157605  | NA        | 0.157555 | NA       |
| AT2G17090 | SSP       | 0        | 0        | 0        | 0         | 0        | 0        | 0.889303 | 0        | 0         | 0         | 0        | 0        | 0.160764 | NA       | 0         | NA        | 0        | 0.26862  |
| AT2G17110 | AT2G17110 | 149.8019 | 133.8185 | 123.6148 | 144.7579  | 102.6824 | 137.564  | 158.296  | 169.3857 | 151.3181  | 97.87263  | 111.7481 | 106.6984 | -0.07875 | 0.753946 | 0.22554   | 0.332124  | -0.36053 | 0.26862  |
| AT2G17115 | AT2G17115 | 1.188904 | 0        | 0        | 0         | 0.662467 | 0        | 0        | 0        | 0         | 0         | 0        | 0        | -0.10611 | NA       | -0.20843  | NA        | 0.250504 | NA       |
| AT2G17120 | LYM2      | 450.5946 | 385.3971 | 418.4877 | 590.1667  | 700.8904 | 549.2593 | 506.903  | 494.1316 | 496.9092  | 291.6988  | 311.2981 | 303.5202 | 0.544132 | 4.99E-05 | 0.24869   | 0.107521  | -0.46772 | 0.010526 |
| AT2G17130 | IDH2      | 271.0701 | 278.3424 | 244.6543 | 468.0917  | 513.4121 | 472.5025 | 385.0684 | 408.8993 | 488.123   | 228.3695  | 223.4961 | 235.1508 | 0.863618 | 3.23E-10 | 0.683522  | 1.73E-06  | -0.20224 | 0.451792 |
| AT2G17140 | AT2G17140 | 41.61164 | 35.68492 | 29.61605 | 23.9201   | 20.53649 | 30.90206 | 28.45771 | 33.44559 | 23.4299   | 37.42189  | 23.94601 | 24.86176 | -0.49149 | 0.164296 | -0.30601  | 0.452663  | -0.27404 | 0.679892 |
| AT2G17150 | NLP1      | 181.9023 | 132.0342 | 133.9161 | 121.2502  | 116.5942 | 124.6051 | 128.0597 | 125.1512 | 76.14719  | 122.8206  | 147.6671 | 129.4883 | -0.30364 | 0.212842 | -0.43543  | 0.078829  | -0.16908 | 0.710197 |
| AT2G17160 | AT2G17160 | 0        | 0        | 0        | 0         | 0        | 0        | 0        | 0        | 0.959536  | 0         | 0        | 0        | 0        | NA       | 0         | NA        | 0.171512 | NA       |
| AT2G17170 | AT2G17170 | 0        | 1.784246 | 0        | 0.412416  | 0        | 0.996841 | 0        | 0        | 0         | 0.959536  | 0        | 0        | -0.01273 | NA       | -0.28675  | NA        | -0.07784 | NA       |
| AT2G17180 | ZAT2      | 0        | 0        | 0        | 0.662467  | 0        | 0        | 0        | 0        | 0.976246  | 0         | 0        | 0        | 0.097788 | NA       | 0.140077  | NA        | 0        | 0.033162 |
| AT2G17190 | DSK2A     | 422.0609 | 387.1814 | 430.0766 | 424.3756  | 354.42   | 413.6889 | 371.7289 | 450.976  | 350.4273  | 325.2826  | 222.1658 | 315.9515 | -0.05585 | 0.806651 | -0.08067  | 0.732204  | -0.50596 | 0.033162 |
| AT2G17200 | SK2B      | 586.1296 | 545.9793 | 511.1988 | 694.5078  | 596.2205 | 760.5895 | 538.9179 | 621.4406 | 534.0066  | 475.9297  | 428.3675 | 433.0089 | 0.31337  | 0.031079 | 0.041905  | 0.833581  | -0.29238 | 0.182669 |
| AT2G17210 | PCMP-E77  | 23.77808 | 7.136984 | 12.87654 | 11.96005  | 5.962205 | 16.94629 | 15.11816 | 19.42002 | 8.786214  | 18.23118  | 11.97301 | 9.323159 | -0.33243 | 0.561978 | -0.05208  | 0.940589  | -0.148   |          |







|           |           |          |          |          |          |          |          |          |          |          |          |          |          |          |          |           |          |           |          |    |
|-----------|-----------|----------|----------|----------|----------|----------|----------|----------|----------|----------|----------|----------|----------|----------|----------|-----------|----------|-----------|----------|----|
| AT2G19480 | NAP1      | 1939.102 | 1671.839 | 1760.223 | 1583.676 | 1771.437 | 1604.914 | 1656.772 | 1739.171 | 2414.256 | 1819.28  | 1862.468 | 1735.143 | -0.11385 | 0.539595 | 0.110779  | 0.572543 | 0.011129  | 0.981052 |    |
| AT2G19490 | AT2G19490 | 58.25629 | 51.74313 | 60.51975 | 75.88447 | 90.75802 | 76.75674 | 72.92289 | 64.7334  | 53.69353 | 75.80331 | 71.83803 | 60.08258 | 0.485666 | 0.048932 | 0.152336  | 0.633271 | 0.263462  | 0.563955 |    |
| AT2G19500 | CKX2      | 0        | 0        | 0        | 7.42348  | 3.312336 | 0.996841 | 3.557214 | 5.39445  | 0.976246 | 0        | 0        | 0        | 1.425507 | 0.020713 | 1.173049  | 0.070015 | 0         | NA       |    |
| AT2G19510 | LBD8      | 0        | 0        | 0        | 0        | 0        | 0        | 0.889303 | 0        | 0        | 0        | 0        | 0        | 0        | 0        | 0.160764  | NA       | 0         | NA       |    |
| AT2G19520 | MSI4      | 685.9976 | 699.4244 | 670.8679 | 659.8649 | 663.7922 | 701.7759 | 595.8333 | 685.0951 | 628.7024 | 678.3917 | 641.221  | 594.6103 | -0.0226  | 0.883273 | -0.10631  | 0.451574 | -0.10119  | 0.652681 |    |
| AT2G19530 | AT2G19530 | 23.77808 | 14.27397 | 28.3284  | 46.60296 | 56.97219 | 33.89259 | 38.24005 | 33.44559 | 58.57476 | 27.82653 | 19.95501 | 27.78994 | 0.942748 | 0.00763  | -0.855213 | 0.022577 | 0.054844  | 0.957023 |    |
| AT2G19540 | AT2G19540 | 498.1508 | 533.4896 | 585.8827 | 733.2747 | 722.0893 | 709.7506 | 687.4316 | 687.2529 | 594.5338 | 562.2879 | 591.9986 | 557.3177 | 0.417827 | 0.000434 | 0.281243  | 0.02983  | 0.079766  | 0.757199 |    |
| AT2G19550 | AT2G19550 | 3.566712 | 16.05821 | 3.862963 | 7.011065 | 9.937009 | 4.984204 | 7.114428 | 5.39445  | 3.904984 | 2.878607 | 9.312338 | 3.10772  | 0.028372 | 0.970604 | -0.2892   | 0.699357 | -0.40021  | NA       |    |
| AT2G19560 | EER5      | 121.2682 | 146.3082 | 113.3136 | 136.0971 | 164.9544 | 197.3745 | 185.8644 | 138.0979 | 131.7932 | 156.4043 | 156.9794 | 130.5242 | 0.372229 | 0.106742 | 0.262012  | 0.310586 | 0.220488  | 0.595343 |    |
| AT2G19570 | CD1       | 7.133424 | 1.784246 | 5.150617 | 6.598649 | 11.92441 | 3.987363 | 8.003731 | 4.31556  | 14.64369 | 1.919071 | 3.991002 | 8.287252 | 0.437232 | 0.51679  | 0.615826  | 0.367341 | -0.04406  | NA       |    |
| AT2G19572 | AT2G19572 | 1.188904 | 1.784246 | 1.287654 | 0.824831 | 0        | 0.996841 | 1.778607 | 1.07889  | 0.976246 | 2.878607 | 0        | 1.035907 | -0.42134 | 0.555759 | -0.02922  | 0.972664 | 0.010496  | NA       |    |
| AT2G19580 | TET2      | 34.47821 | 26.76369 | 20.60247 | 7.42348  | 15.23675 | 11.96209 | 8.893035 | 9.710009 | 6.833722 | 23.98839 | 18.62468 | 15.5386  | -1.13401 | 0.005569 | -1.45344  | 0.000821 | -0.43702  | 0.558736 |    |
| AT2G19582 | AT2G19582 | 0        | 0        | 0        | 0        | 0        | 0        | 0        | 0        | 0        | 0        | 0        | 0        | #N/A     | #N/A     | #N/A      | #N/A     | #N/A      | #N/A     |    |
| AT2G19590 | ACO1      | 57.06739 | 69.5856  | 66.95803 | 32.99325 | 37.09817 | 33.89259 | 22.23259 | 28.05114 | 21.47741 | 65.24842 | 62.5257  | 81.83662 | -0.85048 | 0.000951 | -1.34676  | 1.09E-06 | 0.125649  | 0.826501 |    |
| AT2G19600 | KEA4      | 183.0912 | 230.1627 | 185.4222 | 178.1635 | 170.9166 | 173.4503 | 143.1779 | 183.4113 | 145.4607 | 178.4736 | 168.9524 | 186.4632 | -0.18058 | 0.344639 | -0.32979  | 0.082458 | -0.14929  | 0.655993 |    |
| AT2G19610 | AT2G19610 | 0        | 0        | 0        | 1.287654 | 0.412416 | 0.662467 | 0        | 0.889303 | 1.07889  | 0.976246 | 1.919071 | 0        | -0.09593 | NA       | 0.267243  | NA       | 0.292791  | NA       |    |
| AT2G19620 | NDL3      | 149.8019 | 98.13353 | 131.3407 | 114.6515 | 96.05775 | 162.485  | 116.4988 | 128.3879 | 107.3871 | 141.0517 | 163.6311 | 110.842  | -0.04687 | 0.887012 | -0.11482  | 0.728375 | 0.110391  | 0.845546 |    |
| AT2G19630 | AT2G19630 | 0        | 1.784246 | 0        | 0        | 0        | 0        | 0        | 0        | 0        | 0        | 2.660668 | 1.035907 | -0.33099 | NA       | -0.2826   | NA       | 0.307069  | NA       |    |
| AT2G19640 | ASHR2     | 95.11232 | 94.56504 | 99.14938 | 76.29688 | 73.53387 | 84.73147 | 80.92662 | 85.23231 | 80.05217 | 76.76285 | 93.12338 | 81.83662 | -0.30186 | 0.164235 | -0.22592  | 0.35823  | -0.20174  | 0.606829 |    |
| AT2G19650 | AT2G19650 | 126.0238 | 135.6027 | 117.1765 | 47.01538 | 60.94699 | 63.79781 | 36.46144 | 21.5778  | 18.54867 | 110.3466 | 123.7111 | 93.23159 | -0.11309 | 1.39E-06 | -2.16235  | 1.65E-17 | -0.20306  | 0.657308 |    |
| AT2G19660 | AT2G19660 | 9.511232 | 10.70548 | 10.30123 | 2.062078 | 1.324935 | 0.996841 | 2.66791  | 0        | 2.928738 | 9.593536 | 7.982004 | 5.179533 | -1.84871 | 0.001104 | -1.61649  | 0.006768 | -0.31617  | NA       |    |
| AT2G19670 | PRMT12    | 84.41218 | 107.0548 | 108.1363 | 89.08176 | 101.3575 | 85.72833 | 56.91542 | 70.12785 | 51.74104 | 92.11542 | 93.12338 | 89.0796  | -0.10254 | 0.694214 | -0.71678  | 0.001569 | -0.11579  | 0.805717 |    |
| AT2G19680 | AT2G19680 | 194.9802 | 212.3253 | 243.3667 | 315.0855 | 351.7701 | 291.0775 | 271.2376 | 238.4347 | 316.3037 | 243.722  | 234.1388 | 236.1867 | 0.55075  | 0.000764 | 0.338907  | 0.063014 | 0.132015  | 0.69795  |    |
| AT2G19690 | PLA2-BETA | 40.42273 | 55.31163 | 46.35556 | 85.78244 | 92.08295 | 80.7441  | 59.58333 | 62.57562 | 61.5035  | 65.24842 | 62.5257  | 81.83662 | 0.853098 | 0.000289 | 0.368611  | 0.197343 | 0.558268  | 0.128698 |    |
| AT2G19700 | AT2G19700 | 0        | 0        | 0        | 0        | 0        | 0.996841 | 0        | 0        | 0.995936 | 0        | 0        | 0        | 0.134417 | NA       | 0         | NA       | 0.144669  | NA       |    |
| AT2G19710 | AT2G19710 | 140.2907 | 98.13353 | 96.57408 | 127.024  | 124.5438 | 164.4787 | 151.1816 | 168.3068 | 123.9832 | 85.39867 | 93.12338 | 95.3034  | 0.281701 | 0.243197 | 0.38016   | 0.12076  | -0.29289  | 0.468917 |    |
| AT2G19720 | RPS15AB   | 40.42273 | 35.68492 | 46.35556 | 56.91335 | 50.34751 | 35.88627 | 38.24005 | 42.07671 | 56.62227 | 37.42189 | 26.60668 | 64.2262  | 0.219768 | 0.57823  | -0.139583 | 0.758125 | -0.066434 | 0.939653 |    |
| AT2G19730 | RPL28A    | 1415.985 | 1382.791 | 1352.037 | 1769.263 | 1693.929 | 1335.767 | 1133.862 | 1120.967 | 1723.074 | 1600.505 | 1438.091 | 1598.404 | 0.20595  | 0.314945 | -0.06005  | 0.81254  | 0.156588  | 0.656746 |    |
| AT2G19740 | RPL13A    | 425.6276 | 469.2567 | 453.2543 | 900.7156 | 800.9229 | 625.0192 | 555.8214 | 503.8416 | 110.968  | 337.7565 | 355.1992 | 532.456  | 0.748446 | 0.007379 | 0.651973  | 0.02556  | -0.12941  | 0.837597 |    |
| AT2G19750 | RPS30C    | 399.4717 | 351.4965 | 433.9395 | 541.0892 | 679.6914 | 456.5531 | 360.1679 | 299.9314 | 588.6763 | 382.8547 | 409.7429 | 520.0251 | 0.481062 | 0.059804 | 0.071295  | 0.835109 | 0.140107  | 0.789372 |    |
| AT2G19755 | AT2G19755 | 0        | 0        | 0        | 0.824831 | 0.662467 | 0        | 0        | 0        | 0        | 0        | 0        | 0        | 0.256538 | NA       | 0         | NA       | 0         | NA       |    |
| AT2G19760 | PRO1      | 498.1508 | 444.2773 | 535.6642 | 537.7899 | 450.4777 | 400.73   | 386.847  | 358.1915 | 775.1393 | 531.5827 | 470.9382 | 706.4883 | -0.08459 | 0.808108 | 0.037705  | 0.921536 | 0.199199  | 0.71013  |    |
| AT2G19770 | PRO4      | 0        | 0        | 0        | 0        | 0        | 0        | 0.889303 | 0        | 0        | 0        | 0        | 0        | 0        | 0        | 0.160764  | NA       | 0         | NA       |    |
| AT2G19780 | AT2G19780 | 122.4571 | 105.2705 | 117.1765 | 42.06639 | 44.38531 | 58.81361 | 56.02612 | 56.10228 | 46.85981 | 110.3466 | 78.4897  | 119.1293 | -1.23464 | 3.37E-08 | -1.07969  | 4.16E-06 | -0.15216  | 0.748754 |    |
| AT2G19790 | AT2G19790 | 381.6382 | 483.5307 | 552.4037 | 734.9246 | 750.5754 | 564.2119 | 467.7736 | 450.976  | 733.1607 | 601.6288 | 944.5371 | 440.2603 | 0.50715  | 0.075698 | 0.21004   | 0.534258 | 0.460836  | 0.28843  |    |
| AT2G19796 | AT2G19796 | 0        | 0        | 0        | 0        | 0        | 0.996841 | 0        | 0        | 0        | 0        | 0        | 0        | 0.15625  | NA       | 0         | NA       | 0         | NA       |    |
| AT2G19800 | MIOX2     | 20.21137 | 19.62671 | 23.17778 | 20.20836 | 18.54908 | 22.92734 | 28.45771 | 15.10446 | 17.52743 | 19.19071 | 22.61568 | 30.04129 | -0.04374 | 0.932687 | -0.03086  | 0.955414 | 0.165937  | 0.850046 |    |
| AT2G19802 | AT2G19802 | 0        | 0        | 0        | 0        | 0        | 0        | 0        | 0        | 0        | 0        | 0        | 0        | #N/A     | #N/A     | #N/A      | #N/A     | #N/A      | #N/A     |    |
| AT2G19803 | AT2G19803 | 0        | 0        | 0        | 0        | 0        | 0.996841 | 0        | 0        | 1.952492 | 0        | 1.330334 | 0        | 0.116153 | NA       | 0.280653  | NA       | 0.173584  | NA       |    |
| AT2G19806 | AT2G19806 | 0        | 0        | 0        | 0        | 0.662467 | 0        | 0        | 0        | 0        | 0        | 0        | 0        | 0.128567 | NA       | 0         | NA       | 0         | NA       |    |
| AT2G19810 | AT2G19810 | 180.7134 | 190.9143 | 162.2444 | 155.4807 | 121.2315 | 176.4408 | 155.6281 | 225.488  | 221.6078 | 160.2424 | 148.9974 | 165.745  | -0.2327  | 0.312417 | 0.170603  | 0.501001 | -0.15854  | 0.704722 |    |
| AT2G19820 | LBD9      | 0        | 0        | 0        | 0        | 0        | 0        | 0.889303 | 0        | 0        | 0        | 0        | 0        | 0        | 0        | 0         | NA       | 0         | 0.262302 | NA |
| AT2G19825 | AT2G19825 | 0        | 0        | 0        | 0        | 0        | 0        | 0        | 0        | 0        | 0        | 0        | 0        | 0        | 0        | 0.160764  | NA       | 0         | NA       |    |
| AT2G19830 | VP53.1    | 916.6449 | 992.0408 | 995.3568 | 858.6492 | 1024.174 | 874.2294 | 993.352  | 858.7964 | 1210.545 | 1162.957 | 1259.826 | 1120.851 | -0.07332 | 0.696782 | 0.0767    | 0.69829  | 0.282944  | 0.224063 |    |
| AT2G19840 | AT2G19840 | 0        | 0        | 0        | 0        | 0.662467 | 0        | 0        | 0        | 0        | 0        | 0        | 0        | 0.128567 | NA       | 0         | NA       | 0         | NA       |    |
| AT2G19850 | AT2G19850 | 0        | 0        | 0        | 0        | 0.662467 | 1.993682 | 1.778607 | 0        | 0        | 0        | 0        | 0        | 0.369855 | NA       | 0.274272  | NA       | 0.153339  | NA       |    |
| AT2G19860 | HKK2      | 196.1692 | 155.2294 | 139.0667 | 77.12171 | 82.80841 | 79.74726 | 90.70896 | 77.68008 | 117.1495 | 155.4448 | 192.8984 | 165.745  | -1.0091  | 6.56E-07 | -0.75894  | 0.000395 | 0.057495  | 0.906873 |    |
| AT2G19870 | AT2G19870 | 321.0041 | 290.8321 | 285.8591 | 208.2699 | 206.6898 | 220.3018 | 244.5585 | 231.9613 | 263.5864 | 259.0746 | 236.7994 | 280.7307 | -0.49816 | 0.000399 | -0.27636  | 0.080351 | -0.20511  | 0.406818 |    |
| AT2G19880 | AT2G19880 | 296.0371 | 324.7328 | 314.1877 | 235.9017 | 225.9013 | 301.0459 | 267.6803 | 311.7992 | 235.2753 | 245.6411 | 216.8444 | 278.6589 | -0.29367 | 0.117843 | -0.19384  | 0.385728 | -0.32262  | 0.253002 |    |
| AT2G19890 | AT2G19890 | 0        | 0        | 0        | 0.412416 | 1.324935 | 0        | 0        | 2.15778  | 0.976246 | 0        | 0        | 0        | 0.319616 | NA       | 0.500214  | NA       | 0         | NA       |    |
| AT2G19893 | AT2G19893 | 0        | 0        | 0        | 0        | 0        | 0        | 0        | 0        | 0        | 0        | 0        | 0        | #N/A     | #N/A     | #N/A      | #N/A     | #N/A      | #N/A     |    |
| AT2G19900 | NADP-ME1  | 0        | 1.784246 | 1.287654 | 4.948987 | 3.974804 | 7.974726 | 10.67164 | 5.39445  | 5.857476 | 2.878607 | 2.660668 | 1.035907 | 1.238352 | 0.047754 | 1.550717  | 0.013578 | 0.386461  | NA       |    |
| AT2G19910 | RDR3      | 45.17835 | 46.3904  | 55.36914 | 28.86909 | 25.17376 | 26.9147  | 27.56841 | 31.28781 | 16.59618 | 72.92471 | 70.5077  | 62.15439 | -0.80788 | 0.004974 | -0.90589  | 0.003227 | 0.463764  | 0.295584 |    |
| AT2G19920 | RDR4      | 19.02246 | 12.48972 | 18.02716 | 25.15735 | 17.88662 | 11.96209 | 25.7898  | 21.5778  | 12.6912  | 51.81492 | 39.91002 | 41.43626 | 0.145512 | 0.773508 | 0.215916  | 0.679675 | 1.268077  | 0.008255 |    |
| AT2G19930 | RDR5      | 67.76752 | 69.5856  | 61.80741 | 36.70499 | 35.77323 | 48.8452  | 65.80846 | 52.86561 | 43.93107 | 74.84378 | 95       |          |          |          |           |          |           |          |    |

|           |           |          |          |          |          |          |          |          |          |          |          |          |          |          |          |          |          |          |          |    |
|-----------|-----------|----------|----------|----------|----------|----------|----------|----------|----------|----------|----------|----------|----------|----------|----------|----------|----------|----------|----------|----|
| AT2G20440 | AT2G20440 | 99.86793 | 117.7602 | 95.28642 | 94.85558 | 80.15854 | 79.74726 | 99.60199 | 86.3112  | 61.5035  | 109.3871 | 86.47171 | 101.5188 | -0.2681  | 0.28679  | -0.31562 | 0.235328 | -0.05539 | 0.92373  |    |
| AT2G20450 | RP14A     | 444.6501 | 405.0238 | 480.2951 | 618.6234 | 626.694  | 481.4741 | 354.8321 | 350.6392 | 601.3675 | 558.4497 | 452.3135 | 498.271  | 0.365869 | 0.110821 | -0.02605 | 0.933751 | 0.176192 | 0.680022 |    |
| AT2G20453 | AT2G20453 | 0        | 0        | 0        | 0        | 0        | 0        | 0        | 0        | 0        | 0        | 0        | 0        | #N/A     | #N/A     | #N/A     | #N/A     | #N/A     | #N/A     |    |
| AT2G20460 | AT2G20460 | 0        | 0        | 0        | 0.412416 | 0.662467 | 0        | 0.889303 | 0        | 0.976246 | 0        | 0        | 0        | 0.222449 | NA       | 0.350665 | NA       | 0        | NA       |    |
| AT2G20463 | AT2G20463 | 0        | 0        | 0        | 0        | 0        | 0        | 0        | 0        | 0        | 0        | 0        | 0        | #N/A     | #N/A     | #N/A     | #N/A     | #N/A     | #N/A     |    |
| AT2G20465 | AT2G20465 | 0        | 0        | 0        | 0        | 0        | 0        | 0        | 0        | 0        | 0        | 0        | 0        | #N/A     | #N/A     | #N/A     | #N/A     | #N/A     | #N/A     |    |
| AT2G20470 | AT2G20470 | 4.755616 | 3.568492 | 0        | 3.71174  | 2.649869 | 4.984204 | 5.335821 | 4.31556  | 8.786214 | 6.716749 | 5.321336 | 5.179533 | 0.206711 | 0.786505 | 0.737082 | 0.281395 | 0.061452 | NA       |    |
| AT2G20480 | AT2G20480 | 2.377808 | 1.784246 | 5.150617 | 3.71174  | 7.28714  | 3.987363 | 3.557214 | 3.23667  | 10.73871 | 5.757214 | 7.982004 | 6.215439 | 0.379465 | 0.589096 | 0.547511 | 0.443356 | 0.669477 | NA       |    |
| AT2G20490 | NOP10     | 78.46766 | 78.50683 | 87.5605  | 115.0639 | 125.8688 | 82.73778 | 75.5908  | 58.26006 | 176.7005 | 71.00564 | 97.11438 | 108.7702 | 0.375914 | 0.325286 | 0.316235 | 0.446953 | 0.160597 | 0.836699 |    |
| AT2G20495 | AT2G20495 | 68.95643 | 49.95889 | 95.28642 | 91.14384 | 82.14594 | 69.77885 | 86.26244 | 69.04896 | 58.57476 | 80.60099 | 94.45371 | 80.80071 | 0.168149 | 0.58359  | -0.01761 | 0.962974 | 0.22145  | 0.660786 |    |
| AT2G20500 | AT2G20500 | 21.40027 | 17.84246 | 30.9037  | 35.88015 | 31.13596 | 31.8989  | 29.34701 | 26.97225 | 29.28738 | 23.02886 | 34.58868 | 22.78894 | 0.448222 | 0.21595  | 0.244187 | 0.572191 | 0.138533 | 0.864774 |    |
| AT2G20510 | ATTIM44-1 | 3.566712 | 1.784246 | 1.287654 |          |          |          |          |          | 0.976246 | 2.878607 | 2.660668 |          | -1.13467 | 0.05763  | -0.81259 | 0.206807 | -0.11114 | NA       |    |
| AT2G20515 | AT2G20515 | 17.83356 | 17.84246 | 18.02716 | 25.15735 | 25.83622 | 21.9305  | 16.00746 | 18.34113 | 20.50117 | 21.10978 | 15.96401 | 24.86176 | 0.412541 | 0.308747 | 0.020519 | 0.970378 | 0.196586 | 0.813511 |    |
| AT2G20520 | FLA6      | 0        | 0        | 0        | 0.412416 | 0        | 0        | 0        | 0        | 0        | 0        | 0        | 0        | 0.095918 | NA       | 0        | NA       | 0        | NA       |    |
| AT2G20530 | PHB6      | 248.4809 | 233.7362 | 283.284  | 342.3049 | 337.8583 | 276.1249 | 253.4515 | 260.0125 | 299.7075 | 277.3058 | 284.6915 | 284.8743 | 0.319134 | 0.047535 | 0.081049 | 0.697196 | 0.138485 | 0.652663 |    |
| AT2G20540 | PCMP-E78  | 15.45575 | 24.97944 | 16.73951 | 17.32145 | 17.22415 | 10.96525 | 13.33955 | 21.5778  | 16.59618 | 15.35257 | 27.93701 | 13.46678 | -0.23341 | 0.639315 | -0.11333 | 0.845772 | -0.00884 | 0.993544 |    |
| AT2G20550 | AT2G20550 | 86.78999 | 53.27338 | 79.83457 | 50.72712 | 47.03518 | 26.9147  | 46.24378 | 44.23449 | 47.83605 | 60.45074 | 34.58868 | 65.26211 | -0.7539  | 0.013715 | -0.64187 | 0.051105 | -0.42891 | 0.40809  |    |
| AT2G20555 | AT2G20555 | 0        | 0        | 0        | 0        | 0        | 0        | 0.889303 | 0        | 0        | 0        | 0        | 0        | 0        | NA       | 0        | NA       | 0        | NA       |    |
| AT2G20560 | AT2G20560 | 41.61164 | 21.41095 | 32.19136 | 54.43886 | 52.33491 | 43.86099 | 48.02239 | 45.31338 | 53.69353 | 36.46235 | 27.93701 | 29.00538 | 0.602208 | 0.046794 | 0.554317 | 0.090819 | -0.05335 | 0.949285 |    |
| AT2G20562 | AT2G20562 | 8.322328 | 1.784246 | 5.150617 | 9.485558 | 14.57428 | 12.95893 | 10.67164 | 9.710009 | 12.6912  | 6.176749 | 9.312338 | 5.179533 | 0.91299  | 0.085797 | 0.784566 | 0.177101 | 0.246171 | NA       |    |
| AT2G20570 | GLK1      | 1708.455 | 2264.208 | 1985.563 | 1376.231 | 922.1544 | 1168.297 | 717.6679 | 909.5042 | 613.0825 | 1831.754 | 1326.343 | 1466.844 | -0.75834 | 0.000146 | -1.37152 | 1.04E-11 | -0.35397 | 0.274581 |    |
| AT2G20580 | RPN1A     | 1284.016 | 1206.15  | 1170.478 | 948.5558 | 814.1723 | 1053.661 | 987.1269 | 1113.414 | 709.7308 | 1193.662 | 1069.589 | 97.7162  | -0.37162 | 0.043989 | -0.37401 | 0.050693 | -0.17414 | 0.605891 |    |
| AT2G20585 | NFD6      | 46.36725 | 55.31163 | 36.05432 | 70.93548 | 65.58426 | 41.86731 | 51.5796  | 37.76115 | 55.64602 | 23.98839 | 27.93701 | 53.86714 | 0.376718 | 0.307113 | 0.083027 | 0.861199 | -0.33229 | 0.608724 |    |
| AT2G20590 | RTLNB17   | 36.85602 | 33.90067 | 29.61605 | 43.30364 | 61.60946 | 34.88943 | 40.90796 | 18.34113 | 48.8123  | 29.7456  | 29.26735 | 40.40035 | 0.446213 | 0.250225 | 0.103485 | 0.837286 | -0.0109  | 0.991988 |    |
| AT2G20595 | AT2G20595 | 1.188904 | 0        | 0        | 0        | 0        | 0        | 0        | 0        | 0        | 0        | 0        | 0        | -0.2184  | NA       | -0.20558 | NA       | -0.19918 | NA       |    |
| AT2G20597 | AT2G20597 | 0        | 0        | 0        | 0        | 0        | 0        | 0        | 0        | 0        | 0        | 0        | 0        | #N/A     | #N/A     | #N/A     | #N/A     | #N/A     | #N/A     |    |
| AT2G20600 | AT2G20600 | 0        | 0        | 0        | 0        | 0        | 0        | 0        | 1.07889  | 0        | 0        | 0        | 0        | 0        | NA       | 0.16673  | NA       | 0        | NA       |    |
| AT2G20605 | AT2G20605 | 0        | 0        | 0        | 0        | 0        | 0        | 0        | 0        | 0        | 0        | 0        | 0        | #N/A     | #N/A     | #N/A     | #N/A     | #N/A     | #N/A     |    |
| AT2G20610 | SUR1      | 1405.284 | 1050.921 | 1090.643 | 1083.416 | 979.7891 | 975.9071 | 974.6766 | 999.0521 | 1141.232 | 1185.026 | 1036.33  | 1078.379 | -0.22102 | 0.157191 | -0.18713 | 0.265027 | -0.10428 | 0.722849 |    |
| AT2G20613 | AT2G20613 | 0        | 0        | 0        | 0        | 0        | 0        | 0        | 0.976246 | 0        | 0        | 0        | 0        | 0        | NA       | 0.16673  | NA       | 0        | NA       |    |
| AT2G20616 | AT2G20616 | 0        | 1.784246 | 0        | 0        | 0.662467 | 0        | 0        | 0        | 0        | 0        | 0        | 0        | -0.12017 | NA       | -0.24312 | NA       | -0.23848 | NA       |    |
| AT2G20618 | AT2G20618 | 0        | 0        | 0        | 0        | 0        | 0        | 0        | 0        | 0        | 0        | 1.330334 | 0        | 0        | NA       | 0        | NA       | 0        | 1.72362  | NA |
| AT2G20619 | AT2G20619 | 0        | 0        | 0        | 0        | 0        | 0        | 0        | 0        | 0        | 0        | 0        | 0        | #N/A     | #N/A     | #N/A     | #N/A     | #N/A     | #N/A     |    |
| AT2G20620 | AT2G20620 | 0        | 0        | 0        | 0        | 0        | 0        | 0        | 0        | 0        | 0        | 0        | 0        | #N/A     | #N/A     | #N/A     | #N/A     | #N/A     | #N/A     |    |
| AT2G20625 | AT2G20625 | 0        | 0        | 0        | 1.237247 | 0.662467 | 0.996841 | 0.889303 | 0        | 0        | 0        | 0        | 0        | 0.561354 | NA       | 0.161554 | NA       | 0        | NA       |    |
| AT2G20630 | PPC3-1.2  | 919.0228 | 1099.096 | 1018.535 | 1393.965 | 1393.831 | 1213.155 | 1291.269 | 1174.911 | 1521.968 | 991.2003 | 1323.682 | 1003.793 | 0.393599 | 0.016499 | 0.388243 | 0.021986 | 0.125539 | 0.696012 |    |
| AT2G20635 | BUB1      | 54.68958 | 53.52738 | 55.36914 | 63.09958 | 54.32232 | 53.8294  | 58.62403 | 33.44559 | 28.31113 | 65.24842 | 57.20436 | 61.11849 | 0.071429 | 0.844574 | -0.40551 | 0.223193 | 0.160547 | 0.7912   |    |
| AT2G20650 | AT2G20650 | 68.95643 | 83.89556 | 88.84815 | 79.59621 | 76.8462  | 91.70935 | 62.25124 | 93.86342 | 67.36097 | 84.43914 | 86.47171 | 75.62118 | 0.033854 | 0.914031 | -0.1112  | 0.724478 | 0.031154 | 0.961402 |    |
| AT2G20660 | RALFL14   | 0        | 0        | 0        | 0        | 0        | 0        | 0        | 0        | 0        | 0        | 0        | 0        | #N/A     | #N/A     | #N/A     | #N/A     | #N/A     | #N/A     |    |
| AT2G20670 | AT2G20670 | 469.6171 | 620.9176 | 498.3222 | 332.8194 | 284.8609 | 497.4235 | 284.5771 | 371.1381 | 291.8976 | 502.7967 | 460.2956 | 550.0664 | -0.49847 | 0.023394 | -0.7207  | 0.000896 | -0.06426 | 0.900246 |    |
| AT2G20680 | MAN2      | 70.14533 | 57.09587 | 43.78025 | 28.04426 | 39.08557 | 30.90206 | 31.12562 | 34.52448 | 38.07359 | 55.65307 | 46.56169 | 75.62118 | -0.76591 | 0.009992 | -0.68138 | 0.033605 | 0.06035  | 0.935289 |    |
| AT2G20690 | AT2G20690 | 317.4374 | 296.1848 | 279.421  | 244.5624 | 229.2137 | 226.2829 | 244.5585 | 319.3514 | 446.1444 | 253.3174 | 274.0488 | 318.0233 | -0.34008 | 0.128426 | 0.171228 | 0.506304 | -0.07729 | 0.87529  |    |
| AT2G20700 | LLG2      | 8.322328 | 1.736984 | 9.01358  | 0.824831 | 0.662467 | 0.996841 | 2.66791  | 1.07889  | 1.952492 | 11.51443 | 11.97301 | 11.39497 | -2.04177 | 0.000346 | -1.39874 | 0.021512 | 0.452864 | NA       |    |
| AT2G20710 | AT2G20710 | 42.80054 | 28.54794 | 32.19136 | 31.756   | 31.79843 | 23.92418 | 14.22886 | 18.34113 | 22.45366 | 33.58375 | 35.91902 | 27.96948 | -0.85641 | 0.017715 | -0.85641 | 0.017715 | -0.1021  | 0.895904 |    |
| AT2G20720 | AT2G20720 | 21.40027 | 48.17464 | 33.47901 | 71.76031 | 76.24673 | 72.76938 | 80.92662 | 96.0212  | 53.69353 | 42.21957 | 51.88302 | 43.50807 | 1.001699 | 0.000769 | 1.122031 | 0.000202 | 0.41218  | 0.454015 |    |
| AT2G20721 | AT2G20721 | 15.45575 | 1.784246 | 11.58889 | 8.660727 | 14.57428 | 11.96209 | 18.67537 | 7.55223  | 11.71945 | 15.35257 | 11.97301 | 8.28752  | 0.148088 | 0.81846  | 0.266173 | 0.682329 | 0.180864 | NA       |    |
| AT2G20722 | AT2G20722 | 7.133424 | 1.736984 | 12.87654 | 6.186234 | 9.937009 | 10.96525 | 10.67164 | 7.55223  | 7.809968 | 12.47396 | 13.30334 | 11.39497 | -0.06526 | 0.921475 | -0.05651 | 0.936669 | 0.359367 | NA       |    |
| AT2G20723 | AT2G20723 | 11.88904 | 10.70548 | 16.73951 | 12.78488 | 14.57428 | 8.971567 | 11.56095 | 8.63112  | 5.857346 | 24.94793 | 41.24035 | 19.68222 | -0.09447 | 0.871888 | -0.49657 | 0.368305 | 0.962896 | NA       |    |
| AT2G20724 | AT2G20724 | 49.93397 | 49.95889 | 39.91728 | 58.97543 | 60.28452 | 36.88811 | 60.42604 | 55.02339 | 163.0331 | 64.28889 | 81.15037 | 96.33931 | 0.150403 | 0.753878 | 0.898755 | 0.021231 | 0.710136 | 0.217892 |    |
| AT2G20725 | AT2G20725 | 332.8931 | 390.7499 | 390.1593 | 298.5888 | 308.7097 | 293.0712 | 273.9051 | 295.6158 | 310.4462 | 394.3691 | 320.6105 | 362.5673 | -0.29835 | 0.04155  | -0.33256 | 0.029368 | -0.03897 | 0.911978 |    |
| AT2G20740 | TOM2AHS   | 328.1375 | 363.9862 | 348.9543 | 361.6885 | 373.6315 | 371.8216 | 444.6517 | 394.8737 | 466.6456 | 381.8952 | 352.5385 | 419.5421 | 0.089799 | 0.578943 | 0.328007 | 0.021231 | 0.152713 | 0.540577 |    |
| AT2G20750 | EXPB1     | 102.2457 | 98.13353 | 117.1765 | 11.54764 | 9.937009 | 12.95893 | 4.446517 | 2.15778  | 5.857476 | 67.16749 | 58.53469 | 64.2262  | -3.0474  | 1.85E-29 | -0.05187 | 8.81E-31 | -0.71714 | 0.029602 |    |
| AT2G20760 | AT2G20760 | 609.9077 | 599.5067 | 591.0333 | 690.3831 | 659.1549 | 690.8107 | 614.5087 | 632.2295 | 688.2534 | 625.6172 | 574.7043 | 585.2872 | 0.17876  | 0.12686  | 0.102643 | 0.448941 | -0.10055 | 0.973485 |    |
| AT2G20770 | GCL2      | 40.42273 | 57.09587 | 55.36914 | 40.41673 | 49.68505 | 49.84204 | 22.23259 | 30.20892 | 27.34889 | 26.867   | 29.26735 | 42.47217 | -0.11645 | 0.749847 | -0.87072 | 0.006169 | -0.57731 | 0.222706 |    |
| AT2G20780 | PLT4      | 185.469  | 212.3253 | 176.4086 | 324.1586 | 317.9843 | 299.0522 | 208.9863 | 290.2214 | 323.1374 | 176.5546 | 180.9254 | 151.2424 | 0.704649 | 0.000118 | 0.509145 | 0.009562 | -0.16674 | 0.65     |    |



|           |           |          |          |          |          |          |          |          |          |          |          |          |          |          |          |          |          |           |          |
|-----------|-----------|----------|----------|----------|----------|----------|----------|----------|----------|----------|----------|----------|----------|----------|----------|----------|----------|-----------|----------|
| AT2G22088 | AT2G22088 | 5.94452  | 0        | 3.862963 | 2.886909 | 5.299738 | 1.993682 | 3.572124 | 4.31556  | 4.88123  | 0        | 1.330334 | 2.071813 | 0.002108 | 0.998498 | 0.186748 | 0.827088 | -0.76405  | NA       |
| AT2G22090 | UBA1A     | 99.86793 | 83.85956 | 84.98519 | 116.3012 | 104.0074 | 123.6083 | 115.6095 | 113.2834 | 113.2445 | 95.95356 | 82.48071 | 98.41112 | 0.334952 | 0.106693 | 0.331735 | 0.137821 | 0.040191  | 0.940148 |
| AT2G22100 | UBA1B     | 95.11232 | 80.29107 | 91.42346 | 84.13278 | 90.09555 | 68.78201 | 72.92289 | 80.91675 | 106.4108 | 66.20796 | 90.46271 | 95.3034  | -0.12671 | 0.066386 | -0.04281 | 0.900041 | -0.09259  | 0.86931  |
| AT2G22110 | AT2G22110 |          |          |          |          |          |          |          |          |          |          |          |          | #N/A     | #N/A     | #N/A     | #N/A     | #N/A      | #N/A     |
| AT2G22120 | AT2G22120 | 127.2127 | 115.976  | 81.12222 | 164.1414 | 121.894  | 128.5925 | 126.2811 | 112.2046 | 100.5533 | 97.87263 | 138.3547 | 87.01615 | 0.350616 | 0.179813 | 0.064066 | 0.853096 | -0.01347  | 0.985661 |
| AT2G22121 | LCR35     | 0        | 0        | 0        | 0        | 0        | 0        | 0        | 0        | 0        | 0        | 0        | 0        | 0        | 0        | 0        | 0        | 0.171512  | NA       |
| AT2G22122 | AT2G22122 | 20.21137 | 10.70548 | 25.75309 | 14.02213 | 11.92441 | 11.96209 | 17.78607 | 11.86779 | 26.35864 | 19.19071 | 41.24035 | 21.75404 | -0.52351 | 0.268308 | -0.03809 | 0.950676 | -0.421752 | 0.591092 |
| AT2G22125 | CS1       | 1981.903 | 1375.654 | 1068.753 | 388.4955 | 329.9087 | 588.1361 | 543.3664 | 741.1974 | 391.4746 | 984.4836 | 1128.123 | 955.1508 | -1.33207 | 0.676-11 | -1.33207 | 0.696-07 | -0.50383  | 0.231985 |
| AT2G22140 | EME1B     | 16.64466 | 12.48972 | 15.45185 | 18.97112 | 20.53649 | 16.94629 | 23.12189 | 15.10446 | 23.4239  | 22.06932 | 10.64267 | 10.35907 | 0.289886 | 0.548896 | 0.401922 | 0.420899 | -0.0372   | 0.976106 |
| AT2G22145 | AT2G22145 | 0        | 0        | 0        | 0        | 0        | 0        | 0        | 0        | 0        | 0        | 0        | 0        | #N/A     | #N/A     | #N/A     | #N/A     | #N/A      | #N/A     |
| AT2G22150 | AT2G22150 | 0        | 0        | 0        | 0        | 0        | 0        | 0        | 0        | 0        | 0        | 0        | 0        | #N/A     | #N/A     | #N/A     | #N/A     | #N/A      | #N/A     |
| AT2G22155 | AT2G22155 | 0        | 0        | 0        | 0        | 0        | 0        | 0        | 0        | 0        | 0        | 2.660668 | 0        | 0        | NA       | 0        | NA       | 0.322821  | NA       |
| AT2G22160 | AT2G22160 | 0        | 0        | 0        | 0        | 0        | 0        | 0        | 0        | 0        | 0.959536 | 0        | 0        | 0        | NA       | 0        | NA       | 0.171512  | NA       |
| AT2G22170 | AT2G22170 | 180.7134 | 157.0137 | 198.2988 | 81.24587 | 101.3575 | 83.73463 | 63.14055 | 65.81229 | 126.912  | 165.0401 | 160.9704 | 153.3142 | -0.97281 | 5.02E-05 | -1.02553 | 3.25E-05 | -0.15841  | 0.756813 |
| AT2G22180 | AT2G22180 | 0        | 0        | 0        | 0.412416 | 0        | 0        | 0        | 0        | 0        | 0        | 1.330334 | 0        | 0.067751 | NA       | 0        | NA       | 0.08065   | NA       |
| AT2G22190 | TPPE      | 177.1467 | 148.0924 | 173.8333 | 131.5606 | 129.8436 | 110.6493 | 136.9527 | 93.86342 | 71.26596 | 193.8262 | 151.6581 | 183.3555 | -0.4079  | 0.088902 | -0.69755 | 0.00332  | 0.080518  | 0.879636 |
| AT2G22200 | ERF056    | 9.511232 | 16.05821 | 11.58889 | 11.96005 | 15.23675 | 13.95577 | 19.56468 | 6.47334  | 12.6912  | 16.31211 | 17.29434 | 19.68222 | 0.137044 | 0.810529 | 0.094292 | 0.883269 | 0.473177  | NA       |
| AT2G22201 | AT2G22201 | 0        | 0        | 0        | 0        | 0        | 0        | 0        | 0        | 0        | 0        | 0        | 0        | #N/A     | #N/A     | #N/A     | #N/A     | #N/A      | #N/A     |
| AT2G22210 | AT2G22210 | 0        | 0        | 0        | 0        | 0        | 0        | 0        | 1.07889  | 0.976246 | 0        | 0        | 2.071813 | 0        | NA       | 0.325048 | NA       | 0.334927  | NA       |
| AT2G22220 | AT2G22220 | 0        | 0        | 0        | 0        | 0        | 0        | 0        | 0        | 0        | 0        | 0        | 0        | #N/A     | #N/A     | #N/A     | #N/A     | #N/A      | #N/A     |
| AT2G22230 | AT2G22230 | 257.9922 | 297.9691 | 309.037  | 200.0216 | 223.9139 | 174.4471 | 167.1891 | 148.8868 | 214.7741 | 388.6119 | 536.1246 | 341.8492 | -0.51102 | 0.016985 | -0.68024 | 0.001588 | 0.533342  | 0.063201 |
| AT2G22240 | IP52      | 413.7386 | 390.7499 | 401.7482 | 182.7001 | 137.7932 | 128.5925 | 137.842  | 129.4668 | 94.69586 | 360.7854 | 375.1542 | 389.5009 | -1.88009 | 1.98E-16 | -1.69562 | 1.5E-22  | -0.09876  | 0.794445 |
| AT2G22241 | AT2G22241 |          |          |          |          |          |          |          |          |          |          |          |          | #N/A     | #N/A     | #N/A     | #N/A     | #N/A      | #N/A     |
| AT2G22250 | PAT       | 209.2471 | 183.7773 | 172.5457 | 166.2035 | 169.5916 | 161.4882 | 134.2848 | 154.2813 | 121.0545 | 155.4448 | 155.6491 | 135.7038 | -0.18325 | 0.333855 | -0.46196 | 0.010922 | -0.33793  | 0.210277 |
| AT2G22260 | ALKBH2    | 38.04493 | 21.41095 | 29.61605 | 37.1174  | 37.09817 | 15.94945 | 32.90423 | 22.65669 | 30.26363 | 31.66468 | 49.22236 | 31.0772  | 0.028889 | 0.954608 | -0.06544 | 0.901599 | 0.263461  | 0.725809 |
| AT2G22270 | AT2G22270 | 98.67903 | 87.42806 | 135.2037 | 105.5784 | 97.38269 | 83.73463 | 109.3843 | 96.0212  | 98.60085 | 105.5489 | 110.4177 | 96.33931 | -0.1573  | 0.530479 | -0.08606 | 0.769164 | -0.05307  | 0.921991 |
| AT2G22280 | AT2G22280 | 0        | 0        | 0        | 0        | 0        | 0        | 0        | 0        | 0.976246 | 0        | 0        | 0        | 0        | NA       | 0.16673  | NA       | 0         | NA       |
| AT2G22290 | RABH1D    | 0        | 0        | 0        | 1.649662 | 0.662467 | 0.996841 | 1.778607 | 1.07889  | 0.976246 | 0.959536 | 0        | 1.035907 | 0.606094 | NA       | 0.648533 | NA       | 0.354518  | NA       |
| AT2G22300 | CMTA3     | 803.6991 | 695.856  | 687.6074 | 815.758  | 830.734  | 1064.626 | 1160.541 | 1318.404 | 1318.404 | 654.4033 | 602.6413 | 672.3033 | 0.300133 | 0.08831  | 0.632147 | 0.000123 | -0.178    | 0.565684 |
| AT2G22310 | UBP4      | 90.3567  | 132.0342 | 106.8753 | 149.2944 | 196.7528 | 149.5261 | 149.403  | 127.309  | 124.9595 | 129.5373 | 121.0604 | 124.3088 | 0.590415 | 0.004108 | 0.296053 | 0.219252 | 0.198838  | 0.622405 |
| AT2G22320 | AT2G22320 | 0        | 0        | 0        | 0.412416 | 0.662467 | 0        | 0        | 0        | 0        | 0        | 0        | 0        | 0.196313 | NA       | 0        | NA       | 0         | NA       |
| AT2G22330 | CYP79B3   | 451.7835 | 396.1026 | 536.9519 | 410.3535 | 323.9465 | 440.6036 | 438.4266 | 452.0549 | 443.2157 | 532.5423 | 528.1426 | 455.7989 | -0.23927 | 0.18126  | -0.05754 | 0.801429 | 0.124186  | 0.70827  |
| AT2G22335 | AT2G22335 | 0        | 0        | 0        | 0.412416 | 0        | 0        | 0        | 0        | 0        | 0        | 0        | 0        | 0.095918 | NA       | 0        | NA       | 0         | NA       |
| AT2G22340 | AT2G22340 | 1.188904 | 0        | 1.287654 | 0.662467 | 1.993682 | 0        | 0        | 0        | 0.959536 | 0        | 0        | 0        | -0.00131 | NA       | -0.4606  | NA       | -0.24719  | NA       |
| AT2G22345 | AT2G22345 | 0        | 0        | 0        | 0        | 0        | 0        | 0        | 0        | 0        | 0        | 0        | 0        | #N/A     | #N/A     | #N/A     | #N/A     | #N/A      | #N/A     |
| AT2G22350 | AT2G22350 | 0        | 0        | 0        | 0        | 0.662467 | 0        | 0        | 0        | 0        | 0        | 0        | 0        | 0.128567 | NA       | 0        | NA       | 0         | NA       |
| AT2G22360 | AT2G22360 | 284.148  | 305.1061 | 276.8457 | 317.56   | 246.4378 | 283.1028 | 330.8209 | 389.4793 | 364.1398 | 301.2942 | 278.0398 | 292.1256 | -0.02416 | 0.90765  | 0.321127 | 0.050466 | 0.013601  | 0.975917 |
| AT2G22370 | MED18     | 61.82301 | 110.6233 | 109.4506 | 133.2102 | 135.1433 | 135.5703 | 96.04478 | 99.25787 | 105.4346 | 101.7108 | 133.0334 | 98.41112 | 0.51758  | 0.025742 | 0.105025 | 0.736731 | 0.239641  | 0.580581 |
| AT2G22380 | AT2G22380 | 0        | 0        | 0        | 0        | 0        | 0        | 0        | 0        | 0        | 0.976246 | 0.959536 | 0        | #N/A     | #N/A     | #N/A     | #N/A     | #N/A      | #N/A     |
| AT2G22390 | ATRA84A4  | 22.58917 | 19.62671 | 24.46543 | 44.12847 | 33.12336 | 20.93366 | 19.56468 | 30.20892 | 18.54867 | 22.06932 | 38.57969 | 32.1131  | 0.530208 | 0.189172 | 0.00959  | 0.986154 | 0.401648  | 0.567719 |
| AT2G22400 | AT2G22400 | 683.6198 | 651.2498 | 592.321  | 508.096  | 445.178  | 599.1013 | 705.2177 | 682.9373 | 477.3843 | 614.1028 | 625.257  | 641.2261 | -0.30862 | 0.09709  | -0.04582 | 0.852951 | -0.03458  | 0.939653 |
| AT2G22410 | PCMP-E28  | 30.9115  | 24.97944 | 36.05432 | 23.09527 | 22.52389 | 23.92418 | 30.23632 | 21.5778  | 19.52492 | 22.06932 | 26.60668 | 21.75404 | -0.3891  | 0.289801 | -0.34264 | 0.402822 | -0.37677  | 0.551502 |
| AT2G22420 | PER17     | 48.74506 | 42.8219  | 48.93086 | 36.08852 | 52.33491 | 59.81045 | 69.36567 | 58.26006 | 81.02842 | 49.89585 | 35.91902 | 49.72351 | 0.23404  | 0.434216 | 0.540561 | 0.037694 | -0.04432  | 0.915828 |
| AT2G22425 | AT2G22425 | 164.0687 | 162.3664 | 189.2852 | 300.7573 | 405.43   | 265.1596 | 191.2002 | 197.4369 | 469.5743 | 180.3927 | 279.3701 | 224.7911 | 0.684566 | 0.003678 | 0.684566 | 0.033067 | 0.376537  | 0.493509 |
| AT2G22426 | AT2G22426 | 0        | 0        | 0        | 0        | 0        | 0.996841 | 0.889303 | 0        | 0        | 0        | 0        | 0        | 0.133397 | NA       | 0.133015 | NA       | 0         | NA       |
| AT2G22430 | ATHB-6    | 3147.029 | 3306.208 | 3324.724 | 3397.067 | 3703.855 | 3282.597 | 3775.093 | 3812.797 | 5301.992 | 2987.034 | 2665.989 | 3190.592 | 0.085603 | 0.647829 | 0.032739 | 0.013045 | -0.14224  | 0.621889 |
| AT2G22440 | AT2G22440 | 1.188904 | 0        | 0        | 0        | 0        | 0        | 0        | 0        | 0        | 0        | 0        | 0        | -0.2184  | NA       | -0.20558 | NA       | -0.19918  | NA       |
| AT2G22450 | RIBA2     | 175.9578 | 228.3835 | 242.079  | 346.8415 | 365.0195 | 410.6984 | 527.357  | 604.1784 | 621.8687 | 237.0053 | 190.2378 | 242.4021 | 0.781021 | 2.13E-06 | 1.417434 | 3.2E-19  | 0.059577  | 0.887    |
| AT2G22460 | AT2G22460 | 0        | 0        | 0.412416 | 0.662467 | 0.996841 | 0.889303 | 0        | 0        | 0.976246 | 0.959536 | 0        | 0        | 0.38311  | NA       | 0.352588 | NA       | 0.182041  | NA       |
| AT2G22470 | AGP2      | 10.70014 | 19.62671 | 18.02716 | 94.44317 | 101.3575 | 102.6746 | 97.82338 | 96.0212  | 81.02842 | 23.02886 | 22.61568 | 21.75404 | 2.471566 | 2.62E-18 | 2.356139 | 3.06E-16 | 0.429858  | 0.481893 |
| AT2G22475 | GEM       | 131.9683 | 165.9349 | 148.0802 | 246.0037 | 219.2767 | 220.3018 | 192.9789 | 187.7268 | 131.7936 | 157.3638 | 198.2198 | 148.1346 | 0.572081 | 0.0036   | 0.202799 | 0.401357 | 0.17159   | 0.662311 |
| AT2G22480 | PKF5      | 387.5827 | 258.7157 | 364.4062 | 390.97   | 413.3796 | 418.6731 | 385.9577 | 358.1915 | 222.5841 | 305.1323 | 268.7275 | 324.2387 | 0.260169 | 0.275541 | -0.06796 | 0.820664 | -0.16945  | 0.694775 |
| AT2G22482 | AT2G22482 | 19.02246 | 14.27397 | 15.45185 | 16.08421 | 21.86142 | 19.93682 | 20.45398 | 9.710009 | 23.4299  | 23.98839 | 21.28534 | 12.43088 | 0.1903   | 0.711162 | 0.115597 | 0.844336 | 0.196362  | 0.836955 |
| AT2G22490 | CYCD2-1   | 205.6804 | 233.7362 | 193.1482 | 167.4407 | 158.3297 | 186.4092 | 207.2077 | 179.0957 | 143.5082 | 229.329  | 210.1928 | 199.93   | -0.29748 | 0.119899 | -0.24227 | 0.248371 | 0.022589  | 0.963148 |
| AT2G22496 | MIR79A    | 1.188904 | 0        | 0        | 0.412416 | 0.662467 | 0        | 0.889303 | 0        | 0.959536 | 1.330334 | 2.071813 | 0        | -0.07265 | NA       | -0.09375 | NA       | 0.488518  | NA       |
| AT2G22500 | PUMP7P5   | 149.8019 | 130.25   | 146.7926 | 456.0695 | 491.5507 | 691.8075 | 594.0547 | 604.1784 | 911.8138 | 137.2136 | 118.3997 | 120.1652 | 1.864187 | 7.29E-19 | 1.223353 | 1.54E-26 | -0.17955  | 0.706832 |
| AT2G22510 | AT2G22510 | 5.94452  | 5.327338 | 3.862963 | 9.073143 | 12.58688 | 7.974726 | 4.446517 | 3.23667  | 7.809968 | 3.838143 | 10.64267 | 4.143626 |          |          |          |          |           |          |



|           |            |          |          |          |          |          |          |          |          |          |          |          |          |          |           |           |          |          |           |
|-----------|------------|----------|----------|----------|----------|----------|----------|----------|----------|----------|----------|----------|----------|----------|-----------|-----------|----------|----------|-----------|
| AT2G23840 | AT2G23840  | 512.4176 | 679.7977 | 614.2111 | 684.1974 | 673.7292 | 534.3067 | 552.2575 | 461.7649 | 568.1752 | 763.7904 | 711.7287 | 648.4775 | 0.073137 | 0.723094  | -0.18315  | 0.347115 | 0.233578 | 0.398983  |
| AT2G23850 | AT2G23850  | 0        | 0        | 0        | 0        | 0        | 0        | 0        | 0        | 0        | 0        | 0        | 0        | #N/A     | #N/A      | #N/A      | #N/A     | #N/A     | #N/A      |
| AT2G23860 | AT2G23860  | 0        | 0        | 0        | 0        | 0        | 0        | 0        | 0        | 0        | 0        | 0        | 0        | #N/A     | #N/A      | #N/A      | #N/A     | #N/A     | #N/A      |
| AT2G23870 | AT2G23870  | 0        | 0        | 0        | 0        | 0        | 0        | 0        | 0        | 0        | 0        | 0        | 0        | #N/A     | #N/A      | #N/A      | #N/A     | #N/A     | #N/A      |
| AT2G23880 | AT2G23880  | 0        | 1.784246 | 0        | 0        | 1.324935 | 0        | 1.778607 | 0        | 0.976246 | 2.878607 | 0        | 0        | -0.06146 | NA        | 0.161463  | NA       | 0.184671 | NA        |
| AT2G23900 | AT2G23900  | 97.49012 | 101.702  | 155.8062 | 202.496  | 204.7024 | 170.4598 | 216.1007 | 196.358  | 160.1043 | 141.0517 | 143.6761 | 164.7091 | 0.679958 | 0.001306  | 0.662757  | 0.002451 | 0.323178 | 0.377481  |
| AT2G23910 | AT2G23910  | 2.377808 | 5.352738 | 6.438272 | 34.23049 | 33.12336 | 34.88943 | 89.81965 | 85.23231 | 133.7457 | 5.757214 | 14.63367 | 10.35907 | 0        | NA        | 0.160764  | NA       | 0.160764 | NA        |
| AT2G23920 | AT2G23920  | 492.2062 | 545.9793 | 563.9926 | 842.9774 | 862.5324 | 638.9749 | 512.2388 | 462.8438 | 994.7947 | 635.2126 | 622.5963 | 586.3231 | 0.528279 | 0.039636  | 0.286112  | 0.328257 | 0.194644 | 0.693599  |
| AT2G23940 | AT2G23940  | 212.8138 | 251.5787 | 249.8049 | 321.2717 | 266.9743 | 299.0522 | 212.5435 | 221.1724 | 288.9688 | 263.8723 | 211.5231 | 236.1867 | 0.312568 | 0.094591  | 0.020012  | 0.93883  | 0.002562 | 0.996189  |
| AT2G23945 | AT2G23945  | 0        | 1.784246 | 1.287654 | 1.237247 | 1.324935 | 2.990522 | 0.889303 | 0        | 0.976246 | 0        | 0        | 0        | 0.398955 | 0.569429  | -0.16249  | 0.837156 | -0.30993 | NA        |
| AT2G23950 | AT2G23950  | 180.7134 | 157.0137 | 195.7235 | 129.0861 | 98.04516 | 149.5261 | 136.0634 | 139.1768 | 92.74337 | 187.1094 | 121.0604 | 155.386  | -0.49385 | 0.041774  | -0.52013  | 0.04033  | -0.19228 | 0.679803  |
| AT2G23960 | AT2G23960  | 1.188904 | 0        | 2.575309 | 0.412416 | 2.649869 | 0.996841 | 4.446517 | 0        | 0.976246 | 1.919071 | 2.660668 | 0        | -0.01591 | 0.985107  | 0.184588  | 0.832125 | 0.05238  | NA        |
| AT2G23970 | AT2G23970  | 0        | 0        | 0        | 1.649662 | 0.662467 | 0        | 2.66791  | 3.23667  | 0.976246 | 0        | 0        | 1.035907 | 0.42243  | 0.515389  | 0.984354  | 0.100835 | 0.153874 | NA        |
| AT2G23980 | CNCG6      | 384.016  | 408.5923 | 350.242  | 410.7659 | 374.294  | 447.5815 | 467.7736 | 462.8438 | 362.1873 | 332.9589 | 368.5025 | 332.526  | 0.107768 | 0.554733  | 0.178066  | 0.325268 | -0.14148 | 0.634064  |
| AT2G23985 | AT2G23985  | 73.71204 | 92.78079 | 77.25926 | 80.00862 | 89.43308 | 64.79465 | 90.70896 | 59.33895 | 103.4821 | 77.72239 | 158.3097 | 95.3034  | -0.04116 | 0.918356  | 0.063895  | 0.878829 | 0.413018 | 0.4004134 |
| AT2G23990 | ENODL11    | 0        | 0        | 0        | 0        | 0        | 0        | 1.07889  | 0        | 0        | 0        | 0        | 0        | 0.16673  | NA        | 0.16673   | NA       | -0.50221 | NA        |
| AT2G24000 | SCPL2      | 0        | 3.568492 | 1.287654 | 0.412416 | 0        | 0        | 0.889303 | 1.07889  | 0        | 0.959536 | 0        | 0        | -0.66838 | NA        | -0.33487  | NA       | -0.50221 | NA        |
| AT2G24010 | scpl23     | 9.511232 | 8.92123  | 11.58889 | 4.948987 | 6.624673 | 4.984204 | 3.557214 | 7.52223  | 2.928738 | 5.953536 | 9.312338 | 5.179533 | -0.68054 | 0.228686  | -0.85496  | 0.152836 | -0.25846 | NA        |
| AT2G24020 | AT2G24020  | 1068.825 | 1250.576 | 1359.763 | 1372.107 | 1164.617 | 1128.424 | 1368.638 | 1163.043 | 1426.295 | 1729.083 | 1866.459 | 1524.854 | -0.00328 | 0.988118  | 0.104752  | 0.583657 | 0.698299 | 0.014729  |
| AT2G24030 | AT2G24030  | 3.566712 | 5.352738 | 6.438272 | 4.124156 | 6.624673 | 8.971567 | 8.782338 | 8.63112  | 4.88123  | 4.97678  | 7.982004 | 16.5745  | 0.193043 | 0.786238  | 0.429264  | 0.534097 | 0.687237 | NA        |
| AT2G24040 | AT2G24040  | 24.96698 | 32.11643 | 29.61605 | 70.11065 | 76.8462  | 45.85468 | 46.24378 | 31.28781 | 52.71728 | 41.26003 | 54.54369 | 31.0772  | 1.095149 | 0.000611  | 0.549869  | 0.141265 | 0.496075 | 0.380469  |
| AT2G24050 | EIF(SO)462 | 351.9156 | 321.1643 | 309.037  | 255.2852 | 223.2515 | 224.2892 | 156.5361 | 255.6969 | 252.8477 | 308.9705 | 292.6735 | 308.7001 | -0.47116 | 0.002207  | -0.47522  | 0.003027 | -0.10796 | 0.736006  |
| AT2G24060 | AT2G24060  | 1065.258 | 1273.952 | 1206.532 | 824.4187 | 1063.922 | 941.0177 | 1261.922 | 1157.649 | 1323.79  | 1466.17  | 1573.785 | 1404.689 | -0.32151 | 0.021582  | -0.07934  | 0.654011 | 0.352359 | 0.095529  |
| AT2G24070 | QWR4F      | 8.322328 | 1.784246 | 9.01358  | 2.474493 | 0.662467 | 2.990522 | 9.782338 | 3.23667  | 1.952492 | 3.838143 | 7.982004 | 10.35907 | -1.07033 | 0.089636  | -0.25304  | 0.750912 | 0.115027 | NA        |
| AT2G24080 | AT2G24080  | 0        | 0        | 0        | 0        | 0        | 0        | 0.889303 | 0        | 0        | 0        | 0        | 0        | 0        | NA        | 0.160764  | NA       | 0        | NA        |
| AT2G24090 | AT2G24090  | 1045.047 | 1225.777 | 1212.97  | 993.5091 | 1025.499 | 737.6622 | 806.5983 | 857.7175 | 1409.699 | 1256.992 | 1842.513 | 1436.802 | -0.32415 | 0.193976  | -0.17378  | 0.542484 | 0.367451 | 0.319262  |
| AT2G24100 | AT2G24100  | 158.1242 | 123.113  | 163.5321 | 137.7468 | 128.5187 | 138.5609 | 124.5025 | 106.8101 | 87.86214 | 138.1731 | 175.6041 | 133.6319 | -0.14264 | 0.547232  | -0.07306  | 0.030369 | -0.00923 | 0.987749  |
| AT2G24103 | MIR831A    | 0        | 0        | 0        | 0        | 0        | 0        | 0.889303 | 0        | 0        | 0        | 0        | 0        | 0        | NA        | 0.160764  | NA       | 0        | NA        |
| AT2G24110 | AT2G24110  | 4.755616 | 10.70548 | 9.01358  | 10.31039 | 8.612075 | 8.971567 | 9.782338 | 6.47334  | 11.71495 | 11.51443 | 10.64267 | 10.35907 | 0.191961 | 0.755925  | 0.191138  | 0.777398 | 0.365501 | NA        |
| AT2G24120 | RPOT3      | 596.8298 | 494.2362 | 498.3222 | 448.2957 | 502.8127 | 450.572  | 177.6679 | 698.0418 | 451.0256 | 500.8776 | 552.0886 | 562.4972 | -0.17925 | 0.398439  | 0.225056  | 0.295225 | 0.020459 | 0.968387  |
| AT2G24130 | AT2G24130  | 0        | 0        | 0        | 0        | 0        | 1.993682 | 0        | 0        | 0        | 0        | 1.330334 | 0        | 0.258238 | NA        | 0         | NA       | 0.168094 | NA        |
| AT2G24140 | AT2G24140  | 10.70014 | 5.352738 | 3.862963 | 3.71174  | 9.274542 | 7.974726 | 7.114428 | 11.86779 | 8.786214 | 12.47396 | 25.27635 | 14.50269 | -0.04552 | 0.950326  | 0.318736  | 0.636295 | 1.065641 | NA        |
| AT2G24150 | HPH3       | 527.8734 | 576.3115 | 571.7185 | 741.9988 | 335.8709 | 339.9227 | 239.2226 | 229.8036 | 227.4653 | 503.7562 | 443.0012 | 437.1526 | -0.66463 | 3.43E-08  | -1.24929  | 3.56E-24 | -0.26929 | 0.1573    |
| AT2G24160 | AT2G24160  | 256.8033 | 258.7157 | 218.9012 | 454.482  | 430.6037 | 643.9591 | 332.5959 | 336.6137 | 198.1779 | 100.7512 | 126.3817 | 137.7756 | 1.01937  | 0.672E-06 | 0.232144  | 0.417904 | -0.96674 | 0.000789  |
| AT2G24165 | AT2G24165  | 0        | 1.784246 | 1.287654 | 6.598649 | 7.28714  | 10.96525 | 4.446517 | 0        | 3.904984 | 0.959536 | 0        | 3.10772  | 1.661802 | 0.007216  | 0.59969   | 0.423897 | 0.130554 | NA        |
| AT2G24170 | TMN10      | 111.757  | 78.50683 | 99.14938 | 65.16166 | 52.99738 | 79.74726 | 46.24378 | 44.23449 | 52.71728 | 79.64146 | 67.84703 | 75.62118 | -0.55592 | 0.02      | -0.98555  | 5.53E-05 | -0.36962 | 0.348362  |
| AT2G24180 | CPY1186    | 318.6263 | 310.4588 | 298.7358 | 507.6836 | 473.6641 | 472.5025 | 650.0808 | 598.7839 | 554.5077 | 288.8202 | 316.6195 | 262.0814 | 0.948089 | 7.13E-07  | -0.948089 | 7.13E-07 | -0.10003 | 0.729271  |
| AT2G24190 | SDR2B      | 30.9115  | 26.76369 | 28.3284  | 16.90904 | 19.21155 | 13.95577 | 29.34701 | 28.05114 | 30.26363 | 29.7456  | 18.62468 | 35.22082 | -0.70855 | 0.046768  | 0.02222   | 0.963668 | -0.02306 | 0.982596  |
| AT2G24200 | PM25       | 1839.234 | 1609.39  | 1569.651 | 1581.614 | 1581.972 | 1614.882 | 1856.866 | 2052.409 | 2372.278 | 1632.17  | 1485.983 | 1668.845 | -0.07099 | 0.650713  | 0.319443  | 0.061156 | -0.06756 | 0.805754  |
| AT2G24205 | AT2G24205  | 0        | 0        | 0        | 0        | 0        | 0        | 0        | 0        | 0        | 0        | 0        | 0        | #N/A     | #N/A      | #N/A      | #N/A     | #N/A     | #N/A      |
| AT2G24210 | TPS10      | 8.322328 | 1.784246 | 5.150617 | 0        | 0        | 0        | 0.889303 | 0        | 0        | 0        | 0        | 0        | -2.08348 | 0.000671  | -1.64639  | 0.010181 | 0.809629 | NA        |
| AT2G24220 | PUP5       | 74.90095 | 55.31163 | 48.93086 | 32.58083 | 35.11077 | 35.88627 | 37.35075 | 30.20892 | 41.00233 | 70.0461  | 43.90102 | 68.36983 | -0.76422 | 0.007208  | -0.68549  | 0.025332 | 0.031376 | 0.967712  |
| AT2G24230 | AT2G24230  | 235.403  | 101.702  | 150.6556 | 66.39891 | 68.23413 | 78.50474 | 95.15547 | 90.62675 | 62.47974 | 130.4968 | 163.6311 | 141.9192 | -1.15239 | 1.39E-05  | -0.93721  | 0.000713 | -0.16989 | 0.766458  |
| AT2G24240 | AT2G24240  | 95.11232 | 130.25   | 99.14938 | 198.7843 | 222.589  | 221.2987 | 208.097  | 223.3302 | 246.014  | 88.27728 | 105.0964 | 85.98024 | 0.978101 | 2.61E-08  | 0.529664  | 2.28E-09 | -0.20097 | 0.594257  |
| AT2G24250 | AT2G24250  | 34.47821 | 37.46917 | 47.64321 | 40.00431 | 24.51129 | 34.88943 | 31.12562 | 36.68226 | 28.31113 | 35.50282 | 21.28534 | 32.1131  | -0.23826 | 0.524227  | -0.2969   | 0.455215 | -0.37849 | 0.52736   |
| AT2G24255 | AT2G24255  | 0        | 0        | 0        | 0.412416 | 0        | 0        | 0        | 0        | 0.976246 | 0        | 0        | 0        | 0.065752 | NA        | 0.143461  | NA       | 0        | NA        |
| AT2G24260 | BHLH66     | 26.15589 | 26.76369 | 19.31482 | 33.81808 | 37.70663 | 31.8989  | 26.6791  | 32.3667  | 26.35864 | 17.27164 | 17.29434 | 11.39497 | 0.499847 | 0.159953  | 0.226971  | 0.604002 | -0.58116 | 0.336936  |
| AT2G24270 | ALDH11A3   | 2938.971 | 2922.595 | 2913.962 | 2544.192 | 2268.288 | 2537.957 | 1766.157 | 2144.833 | 2044.285 | 2467.359 | 2059.357 | 2785.553 | -0.2524  | 0.088612  | -0.55247  | 6.52E-05 | -0.22423 | 0.3243    |
| AT2G24280 | AT2G24280  | 1039.102 | 954.5716 | 983.7679 | 684.1974 | 624.0442 | 723.7064 | 808.3769 | 827.5086 | 508.8664 | 1192.703 | 1211.934 | 1090.81  | -0.54476 | 0.000261  | -0.42013  | 0.007537 | 0.226968 | 0.366371  |
| AT2G24285 | AT2G24285  | 0        | 0        | 0        | 1.649662 | 3.24935  | 0        | 4.446517 | 3.23667  | 5.857476 | 0        | 0        | 0        | 0.526528 | 0.438353  | 1.635039  | 0.006801 | 0        | NA        |
| AT2G24290 | AT2G24290  | 140.2907 | 167.7191 | 144.2173 | 164.1414 | 190.7906 | 147.5324 | 130.7276 | 133.7824 | 191.3442 | 142.9708 | 162.3007 | 205.1095 | 0.156718 | 0.542902  | 0.016911  | 0.957787 | 0.174975 | 0.686833  |
| AT2G24300 | CBP60E     | 38.04493 | 28.54794 | 37.34198 | 23.50769 | 25.17376 | 20.93366 | 23.21189 | 22.65669 | 21.47741 | 33.58375 | 29.26735 | 44.54398 | -0.54504 | 0.104163  | -0.5955   | 0.10087  | 0.039748 | 0.963091  |
| AT2G24310 | AT2G24310  | 7.133424 | 1.784246 | 7.725926 | 2.886909 | 3.312336 | 7.974726 | 7.114428 | 2.15778  | 2.928738 | 3.838143 | 0        | 3.10772  | -0.32043 | 0.7631    | -0.30418  | 0.700683 | -0.7294  | NA        |

|           |           |          |          |          |          |          |          |          |          |          |          |          |          |          |          |          |          |          |          |
|-----------|-----------|----------|----------|----------|----------|----------|----------|----------|----------|----------|----------|----------|----------|----------|----------|----------|----------|----------|----------|
| AT2G24696 | AT2G24696 | 0        | 0        | 0        | 0        | 0        | 0        | 0        | 0        | 0        | 0.959536 | 1.330334 | 3.10772  | 0        | NA       | 0        | NA       | 0.889186 | NA       |
| AT2G24700 | REM10     | 45.17835 | 28.54794 | 36.05432 | 56.08852 | 65.58426 | 59.81045 | 55.13682 | 58.26006 | 45.88356 | 59.49121 | 47.89202 | 67.33392 | 0.656808 | 0.017475 | 0.477834 | 0.123697 | 0.616264 | 0.134038 |
| AT2G24710 | GLR2.3    | 1.188904 | 0        | 0        | 0.412416 | 0        | 0        | 0        | 0.889303 | 0        | 0        | 0        | 0        | -0.12978 | NA       | -0.04528 | NA       | -0.2092  | NA       |
| AT2G24720 | GLR2.2    | 1.188904 | 0        | 0        | 0        | 0        | 0        | 0        | 0.889303 | 1.07889  | 0.976246 | 0        | 0        | -0.32553 | NA       | 0.31243  | NA       | -0.26389 | NA       |
| AT2G24730 | AT2G24730 | 0        | 0        | 0        | 0        | 0        | 0        | 0        | 0        | 0        | 0        | 0        | 0        | #N/A     | #N/A     | #N/A     | #N/A     | #N/A     | #N/A     |
| AT2G24735 | AT2G24735 | 1.188904 | 0        | 1.287654 | 0.824831 | 0.662467 | 0.996841 | 1.778607 | 0        | 0.976246 | 0.959536 | 0        | 1.035907 | -0.03591 | NA       | 0.035325 | NA       | -0.09176 | NA       |
| AT2G24740 | SUVH8     | 0        | 0        | 0        | 0        | 0        | 0        | 0.996841 | 0        | 0.976246 | 0        | 0        | 0        | 0.133781 | NA       | 0.142196 | NA       | 0        | NA       |
| AT2G24748 | AT2G24748 | 0        | 0        | 0        | 0        | 0        | 0        | 0.996841 | 0        | 0        | 0        | 0        | 0        | 0.15625  | NA       | 0        | NA       | 0        | NA       |
| AT2G24750 | AT2G24750 | 45.17835 | 24.97944 | 34.76667 | 24.74493 | 23.18635 | 21.9305  | 27.56841 | 25.89336 | 22.45366 | 42.21957 | 49.22236 | 29.00538 | -0.56101 | 0.104752 | -0.45526 | 0.236151 | 0.151126 | 0.837597 |
| AT2G24755 | AT2G24755 | 0        | 0        | 0        | 0        | 0        | 0        | 0        | 0        | 0        | 0        | 0        | 0        | #N/A     | #N/A     | #N/A     | #N/A     | #N/A     | #N/A     |
| AT2G24760 | AT2G24760 | 10.70014 | 8.92123  | 6.438272 | 4.948987 | 4.637271 | 3.987363 | 4.446517 | 4.31556  | 4.88123  | 4.797678 | 2.660668 | 12.43088 | -0.68849 | 0.25245  | -0.68156 | 0.292134 | -0.26704 | NA       |
| AT2G24761 | AT2G24761 | 0        | 0        | 0        | 0        | 0        | 0        | 0        | 0        | 0        | 0        | 0        | 0        | #N/A     | #N/A     | #N/A     | #N/A     | #N/A     | #N/A     |
| AT2G24762 | GDU4      | 161.6909 | 112.4075 | 136.4914 | 82.0707  | 88.10815 | 50.83888 | 42.68657 | 36.68226 | 94.69586 | 169.8378 | 143.6761 | 187.4991 | -0.82819 | 0.007941 | -1.15484 | 0.00023  | 0.267573 | 0.64949  |
| AT2G24765 | ARF3      | 535.2709 | 365.7704 | 360.5432 | 493.249  | 551.1728 | 410.6984 | 403.7438 | 332.2981 | 531.0778 | 422.1957 | 481.5809 | 454.763  | 0.448245 | 0.019332 | 0.251292 | 0.247812 | 0.347348 | 0.238883 |
| AT2G24780 | AT2G24780 | 0        | 0        | 0        | 0        | 0        | 0        | 0        | 0        | 0        | 1.330334 | 0        | 0        | 0        | NA       | 0        | NA       | 0.172362 | NA       |
| AT2G24790 | COL3      | 2223.25  | 2701.348 | 2625.527 | 2948.771 | 2677.03  | 2766.233 | 2063.184 | 2163.174 | 2342.014 | 2552.365 | 2370.655 | 2229.271 | 0.152601 | 0.246814 | -0.19812 | 0.137256 | -0.07612 | 0.761028 |
| AT2G24791 | AT2G24791 | 1.188904 | 0        | 0        | 0        | 0        | 0        | 0.996841 | 0        | 0        | 0        | 1.330334 | 0        | -0.06709 | NA       | -0.21623 | NA       | -0.00394 | NA       |
| AT2G24800 | PER18     | 0        | 1.784246 | 0        | 0.412416 | 0.662467 | 0        | 0        | 0        | 0.976246 | 1.919071 | 0        | 2.071813 | -0.09946 | NA       | -0.11182 | NA       | 0.401943 | NA       |
| AT2G24810 | AT2G24810 | 1.188904 | 0        | 0        | 0        | 0        | 0        | 0        | 0        | 0        | 0        | 0        | 0        | -0.2184  | NA       | -0.20558 | NA       | -0.19918 | NA       |
| AT2G24820 | TIC55     | 612.2855 | 702.9929 | 676.0185 | 481.7014 | 384.8935 | 502.4078 | 576.2687 | 722.8563 | 595.5101 | 592.0335 | 580.0256 | 619.4721 | -0.5321  | 0.000325 | -0.06999 | 0.727523 | -0.14781 | 0.600891 |
| AT2G24830 | AT2G24830 | 159.3131 | 169.5034 | 149.3679 | 139.8089 | 160.9795 | 177.4377 | 164.5211 | 154.2813 | 161.0806 | 158.3234 | 162.3007 | 170.9246 | -0.0094  | 0.968159 | 0.010592 | 0.966065 | 0.043475 | 0.920357 |
| AT2G24834 | AT2G24834 | 0        | 0        | 0        | 0        | 0        | 0        | 0        | 0.889303 | 0        | 0        | 0        | 1.035907 | #N/A     | #N/A     | #N/A     | #N/A     | #N/A     | #N/A     |
| AT2G24840 | AGL61     | 82.03437 | 103.4863 | 63.09506 | 780.7027 | 713.4773 | 881.2072 | 462.4378 | 476.8694 | 450.0494 | 42.21957 | 43.90102 | 45.57989 | 3.209444 | 1.94E-81 | 2.446432 | 2.44E-46 | -0.84959 | 0.001828 |
| AT2G24850 | TAT3      | 228.2696 | 306.8903 | 301.3111 | 242.0879 | 281.5486 | 236.2513 | 267.6803 | 257.8547 | 401.2371 | 289.7798 | 313.9588 | 313.9588 | -0.12987 | 0.592907 | 0.148751 | 0.55537  | 0.130472 | 0.757199 |
| AT2G24870 | AT2G24870 | 2.377808 | 0        | 0        | 0.412416 | 0        | 0        | 0.889303 | 0        | 0.959536 | 2.660668 | 3.10772  | 0        | -0.45155 | 0.480133 | -0.29587 | 0.669578 | 0.53532  | NA       |
| AT2G24880 | AT2G24880 | 0        | 0        | 0        | 0        | 0        | 0        | 0        | 0        | 0        | 0        | 0        | 0        | #N/A     | #N/A     | #N/A     | #N/A     | #N/A     | #N/A     |
| AT2G24890 | AT2G24890 | 0        | 0        | 0        | 0        | 0        | 0        | 0        | 0        | 0        | 0        | 1.330334 | 0        | 0        | NA       | 0        | NA       | 0.172362 | NA       |
| AT2G24900 | AT2G24900 | 0        | 0        | 0        | 0        | 0        | 0        | 0.889303 | 0        | 0        | 0        | 0        | 1.035907 | 0        | NA       | 0.137906 | NA       | 0.15538  | NA       |
| AT2G24910 | AT2G24910 | 0        | 0        | 0        | 0        | 0        | 0        | 0        | 0        | 0        | 0        | 0        | 0        | #N/A     | #N/A     | #N/A     | #N/A     | #N/A     | #N/A     |
| AT2G24915 | AT2G24915 | 0        | 0        | 0        | 0        | 0        | 0        | 0.889303 | 0        | 0        | 0        | 0        | 0        | 0        | NA       | 0.160764 | NA       | 0        | NA       |
| AT2G24920 | AT2G24920 | 0        | 0        | 0        | 0        | 0        | 0        | 0        | 0        | 0        | 0        | 0        | 0        | #N/A     | #N/A     | #N/A     | #N/A     | #N/A     | #N/A     |
| AT2G24930 | AT2G24930 | 0        | 0        | 0        | 0        | 0        | 0        | 0.996841 | 0.889303 | 0        | 0        | 0        | 0        | 0.133397 | NA       | 0.133015 | NA       | 0        | NA       |
| AT2G24940 | MP3       | 0        | 0        | 0.412416 | 0.662467 | 0        | 0        | 0        | 0        | 0        | 0        | 0        | 0        | 0.196313 | NA       | 0        | NA       | 0        | NA       |
| AT2G24945 | AT2G24945 | 0        | 0        | 0        | 0        | 0        | 0        | 0        | 0        | 0        | 0        | 0        | 0        | #N/A     | #N/A     | #N/A     | #N/A     | #N/A     | #N/A     |
| AT2G24950 | AT2G24950 | 0        | 0        | 0        | 0        | 0        | 0        | 0        | 0        | 0.976246 | 0        | 0        | 0        | 0        | NA       | 0.16673  | NA       | 0        | NA       |
| AT2G24960 | AT2G24960 | 91.5456  | 78.50683 | 101.7247 | 100.6294 | 109.9696 | 115.6335 | 99.60199 | 80.91675 | 82.00466 | 121.861  | 135.6941 | 108.7702 | 0.236921 | 0.298485 | -0.05569 | 0.852179 | 0.402826 | 0.209174 |
| AT2G24970 | AT2G24970 | 33.28931 | 33.90067 | 30.9037  | 63.512   | 54.98478 | 40.87047 | 32.90423 | 25.89336 | 48.8123  | 73.88424 | 71.83803 | 51.79533 | 0.673957 | 0.035302 | 0.12403  | 0.77986  | 0.941623 | 0.020617 |
| AT2G24980 | AT2G24980 | 0        | 0        | 0        | 0.662467 | 0        | 0        | 0.959536 | 0        | 0        | 0        | 0        | 0        | 0.098211 | NA       | 0.0      | NA       | 0.141904 | NA       |
| AT2G24990 | AT2G24990 | 168.8244 | 162.3664 | 175.121  | 209.9195 | 208.0147 | 192.3903 | 178.75   | 163.9913 | 217.7029 | 165.0401 | 135.6941 | 167.8169 | 0.266095 | 0.150437 | 0.142327 | 0.51332  | -0.10545 | 0.782654 |
| AT2G25000 | WRKY60    | 53.50068 | 60.66437 | 64.38272 | 392.6196 | 441.8657 | 415.6826 | 261.1703 | 291.6915 | 262.1703 | 275.3014 | 49.89585 | 51.88302 | 2.747933 | 1.28E-56 | 1.236603 | 5.62E-34 | -0.28808 | 0.472467 |
| AT2G25010 | AT2G25010 | 206.8693 | 180.2088 | 176.4086 | 200.8464 | 213.9769 | 208.3397 | 196.5361 | 236.2769 | 234.299  | 208.2192 | 208.8624 | 190.6068 | 0.136346 | 0.459989 | 0.232383 | 0.203616 | 0.101439 | 0.768066 |
| AT2G25011 | MIR836A   | 0        | 0        | 0        | 0        | 0        | 0        | 0        | 0        | 0        | 0        | 0        | 0        | #N/A     | #N/A     | #N/A     | #N/A     | #N/A     | #N/A     |
| AT2G25015 | AT2G25015 | 0        | 1.784246 | 0        | 0        | 0        | 0        | 0        | 0        | 0        | 0        | 0        | 0        | -0.2184  | NA       | -0.20558 | NA       | -0.19918 | NA       |
| AT2G25020 | AT2G25020 | 0        | 0        | 0        | 0        | 0        | 0        | 0.889303 | 0        | 0.976246 | 0        | 0        | 1.035907 | 0        | NA       | 0.330786 | NA       | 0.182304 | NA       |
| AT2G25025 | AT2G25025 | 0        | 0        | 0        | 0        | 0        | 0        | 0        | 0        | 0        | 0        | 0        | 0        | #N/A     | #N/A     | #N/A     | #N/A     | #N/A     | #N/A     |
| AT2G25030 | AT2G25030 | 0        | 0        | 0        | 0        | 0        | 0        | 0        | 0        | 0        | 0        | 0        | 0        | #N/A     | #N/A     | #N/A     | #N/A     | #N/A     | #N/A     |
| AT2G25040 | AT2G25040 | 0        | 0        | 0        | 0        | 0        | 0        | 0        | 0        | 0.976246 | 0        | 0        | 0        | 0        | NA       | 0.16673  | NA       | 0        | NA       |
| AT2G25050 | FH18      | 340.0265 | 221.2465 | 239.5037 | 95.68041 | 88.77061 | 108.6556 | 121.8346 | 132.7035 | 80.05217 | 229.329  | 239.4601 | 218.5763 | -1.41557 | 9.62E-12 | -1.22524 | 9.48E-09 | -0.2208  | 0.585344 |
| AT2G25052 | AT2G25052 | 0        | 0        | 0        | 0        | 0        | 0        | 0        | 0        | 0        | 0        | 0        | 0        | #N/A     | #N/A     | #N/A     | #N/A     | #N/A     | #N/A     |
| AT2G25060 | ENOD114   | 204.4915 | 169.5034 | 167.3951 | 251.1611 | 314.672  | 216.3144 | 200.9826 | 167.2279 | 230.3941 | 173.6759 | 172.9434 | 216.5045 | 0.516395 | 0.012137 | 0.13806  | 0.599613 | 0.0524   | 0.920201 |
| AT2G25070 | PPC-2     | 687.1865 | 660.171  | 703.0593 | 546.0382 | 755.8752 | 648.9433 | 753.24   | 653.8073 | 842.5003 | 706.2182 | 717.05   | 671.2674 | -0.07379 | 0.70334  | 0.131461 | 0.489288 | 0.029069 | 0.943134 |
| AT2G25080 | GPX1      | 5707.928 | 7365.368 | 6851.609 | 2542.542 | 2717.441 | 2759.255 | 3746.636 | 3621.834 | 3745.856 | 8250.087 | 8087.1   | 7236.843 | -1.30039 | 1.2E-31  | -0.83349 | 1.93E-13 | 0.240924 | 0.188182 |
| AT2G25090 | CIPK16    | 3.566712 | 7.136984 | 6.438272 | 25.98218 | 20.53649 | 26.9147  | 13.33955 | 19.42002 | 19.52492 | 3.838143 | 6.65167  | 3.10772  | 1.783428 | 8.56E-05 | 1.316004 | 0.007713 | -0.25759 | NA       |
| AT2G25095 | MIR156A   | 1.188904 | 0        | 1.287654 | 0.412416 | 0.662467 | 0        | 1.778607 | 0        | 0.959536 | 2.660668 | 0        | 0        | -0.28056 | NA       | -0.11958 | NA       | 0.121363 | NA       |
| AT2G25100 | AT2G25100 | 129.5905 | 96.34929 | 135.2037 | 231.3651 | 262.9995 | 171.4566 | 173.4142 | 144.5713 | 194.273  | 166.9592 | 175.6041 | 149.1705 | 0.850688 | 4.87E-05 | 0.476598 | 0.042186 | 0.415669 | 0.224951 |
| AT2G25110 | SDF2      | 411.3608 | 463.904  | 497.0346 | 1535.423 | 1377.932 | 1316.827 | 954.2226 | 950.502  | 1041.654 | 490.3227 | 522.8213 | 473.4093 | 1.610803 | 9.76E-44 | 1.091739 | 5.7E-20  | 0.1135   | 0.657308 |
| AT2G25120 | AT2G25120 | 0        | 0        | 0        | 0.662467 | 0        | 0        | 0.889303 | 0        | 0.976246 | 0        | 0        | 1.035907 | 0.128567 | NA       | 0        | NA       | 0        | NA       |
| AT2G25130 | AT2G25130 | 4.755616 | 5.352738 | 6.438272 | 7.835896 | 11.26194 | 6.977885 | 3.557214 | 2.15778  | 4.88123  | 4.797678 | 14.63367 | 6.215499 | 0.514504 | 0.408205 | -0.43195 | 0.542942 | 0.430933 | NA       |
| AT2G25140 | CLP84     | 181.9023 | 169.5034 | 128.7654 | 133.2102 | 153.6924 | 143.5451 | 113.8308 | 141.3346 | 117.1495 | 129.5373 | 158.3097 | 151.2424 | -0.35549 | 0.490778 | -0.15929 | 0.06991  | -0.12862 | 0.752829 |
| AT2G25150 | SCT       | 2.377808 | 7.136984 | 9.01358  | 0.824831 | 2.649869 | 3.987363 | 0.889303 | 2.15778  | 1.952492 | 7.676285 | 10.64267 | 12.43088 | -0.9491  | 0.131109 | -1.10719 | 0.092129 | 0.606791 | NA       |
| AT2G25160 | CYP82F1   | 0        | 0        | 0        | 0.662467 | 0        | 0.889303 | 0        | 0        | 0        | 0        | 0        | 0        | 0.097058 | NA       | 0.130384 | NA       | 0        | NA       |
| AT2G25169 | AT2G25169 | 0        | 0        | 1.287654 | 0        | 0</      |          |          |          |          |          |          |          |          |          |          |          |          |          |



|           |           |          |          |          |          |          |          |          |          |           |          |          |          |          |          |          |          |          |          |
|-----------|-----------|----------|----------|----------|----------|----------|----------|----------|----------|-----------|----------|----------|----------|----------|----------|----------|----------|----------|----------|
| AT2G25490 | EBF1      | 1011.757 | 581.6642 | 516.3494 | 445.8212 | 480.2888 | 487.4551 | 470.4415 | 539.445  | 508.6242  | 304.1728 | 341.8958 | 396.7522 | -0.56194 | 0.13808  | -0.46164 | 0.056549 | -0.98461 | 0.000138 |
| AT2G25500 | AT2G25500 | 4.755616 | 5.352738 | 2.575309 | 7385896  | 8.612075 | 6.977885 | 1.778607 | 5.39445  | 9.76246   | 7.676285 | 1.330334 | 6.215439 | 0.643144 | 0.313667 | 0.268042 | 0.729777 | 0.209549 | 0.000000 |
| AT2G25510 | AT2G25510 | 323.385  | 2997.533 | 3587.405 | 11849.94 | 11085.73 | 5978.054 | 3867.581 | 2767.353 | 6821.031  | 2021.742 | 3136.928 | 3069.391 | 1.406795 | 0.001099 | 0.408511 | 0.354104 | -0.22946 | 0.769053 |
| AT2G25520 | AT2G25520 | 942.8008 | 961.7086 | 921.9605 | 962.578  | 1118.907 | 1195.212 | 933.7687 | 1000.131 | 912.79    | 544.0567 | 458.9652 | 689.9137 | 0.208473 | 0.227967 | 0.010285 | 0.963799 | -0.72375 | 0.00006  |
| AT2G25530 | AT2G25530 | 30.91115 | 35.68492 | 38.62963 | 35.46774 | 31.79843 | 33.89259 | 20.41119 | 19.42002 | 26.35864  | 47.97678 | 34.58868 | 27.96948 | -0.04364 | 0.91858  | -0.5382  | 0.144846 | 0.079712 | 0.920242 |
| AT2G25540 | CEA10     | 0        | 3.568492 | 0        | 0.412416 | 0.662467 | 0        | 0.557214 | 1.07889  | 0.976246  | 0.995936 | 1.330334 | 1.035907 | -0.39169 | 0.575414 | 0.37877  | 0.611902 | 0.392024 | NA       |
| AT2G25550 | AT2G25550 | 0        | 0        | 0        | 0        | 0        | 0.996841 | 1.778607 | 2.15778  | 0.972646  | 0        | 1.330334 | 0        | 0.0815   | NA       | 0.793587 | NA       | 0.197642 | NA       |
| AT2G25560 | AT2G25560 | 112.9459 | 115.976  | 95.28642 | 97.74249 | 98.04516 | 138.5609 | 126.2811 | 120.8357 | 113.2445  | 95.95356 | 119.7301 | 120.1652 | 0.027638 | 0.925177 | 0.152578 | 0.57425  | 0.048487 | 0.930587 |
| AT2G25565 | AT2G25565 | 1.188904 | 0        | 0        | 0.412416 | 0.662467 | 0        | 0.889303 | 0        | 0         | 0        | 1.330334 | 0        | -0.02395 | NA       | -0.06483 | NA       | -0.01578 | NA       |
| AT2G25570 | AT2G25570 | 84.41218 | 57.09587 | 86.27284 | 111.3522 | 95.39529 | 77.75358 | 79.14801 | 74.44341 | 102.5058  | 89.23681 | 87.80204 | 81.83662 | 0.306983 | 0.241419 | 0.144066 | 0.648029 | 0.157735 | 0.757455 |
| AT2G25580 | PCMP-H55  | 92.73451 | 82.07532 | 91.42346 | 65.57408 | 70.884   | 65.79149 | 88.93035 | 102.4945 | 102.09968 | 92.11542 | 86.47171 | 99.44703 | -0.39298 | 0.075637 | 0.007672 | 0.980049 | 0.057764 | 0.912499 |
| AT2G25590 | AT2G25590 | 253.2365 | 226.5992 | 222.7642 | 280.855  | 288.1733 | 319.9859 | 270.3483 | 224.4091 | 153.2706  | 255.2365 | 278.0398 | 221.684  | 0.326157 | 0.130733 | -0.11381 | 0.670578 | 0.096732 | 0.836113 |
| AT2G25600 | AKT6      | 0        | 1.784246 | 1.287654 | 0        | 0        | 0        | 1.07889  | 0        | 0         | 0.995936 | 1.330334 | 0        | -0.58865 | NA       | -0.30109 | NA       | -0.08036 | NA       |
| AT2G25605 | AT2G25605 | 196.1692 | 292.6163 | 274.2704 | 216.5182 | 235.8383 | 211.3302 | 256.1194 | 242.7502 | 280.1826  | 256.196  | 231.4781 | 241.3662 | -0.18686 | 0.333292 | 0.039674 | 0.871211 | -0.05287 | 0.898539 |
| AT2G25610 | VHA-c"2   | 309.115  | 333.654  | 386.2963 | 368.6995 | 421.9917 | 308.0238 | 441.0945 | 330.1403 | 509.6004  | 411.6408 | 461.6259 | 430.9371 | 0.094989 | 0.6894   | 0.309244 | 0.147743 | 0.332194 | 0.274712 |
| AT2G25620 | AtDBP1    | 74.90095 | 66.0171  | 66.95803 | 117.126  | 104.0074 | 123.6083 | 85.37131 | 106.8101 | 79.07593  | 89.23681 | 67.84703 | 80.80071 | 0.698284 | 0.001349 | 0.359405 | 0.159668 | 0.190112 | 0.677439 |
| AT2G25625 | AT2G25625 | 28.53369 | 30.33218 | 28.3284  | 60.21267 | 60.28452 | 51.83572 | 47.57711 | 31.28781 | 29.28738  | 36.46235 | 34.58868 | 27.96948 | 0.948715 | 0.00083  | 0.025967 | 0.953822 | 0.171645 | 0.796726 |
| AT2G25630 | BGLU14    | 0        | 0        | 0        | 0        | 0        | 0.996841 | 1.778607 | 0        | 0.972646  | 0        | 1.330334 | 1.035907 | 0.098196 | NA       | 0.471843 | NA       | 0.37452  | NA       |
| AT2G25640 | AT2G25640 | 92.73451 | 83.85956 | 88.84815 | 49.90228 | 40.4105  | 51.83572 | 54.24751 | 40.99782 | 42.95482  | 78.68192 | 70.5077  | 91.15977 | -0.87554 | 0.000126 | -0.90167 | 0.000199 | -0.1359  | 0.784009 |
| AT2G25650 | AT2G25650 | 227.0807 | 244.4417 | 195.7235 | 279.2053 | 281.5486 | 254.1944 | 230.3296 | 253.5391 | 372.926   | 198.6239 | 199.5501 | 199.93   | 0.287398 | 0.157056 | 0.355009 | 0.101323 | -0.14999 | 0.710538 |
| AT2G25660 | emb2410   | 73.11759 | 681.582  | 567.8556 | 302.3006 | 272.9365 | 368.8311 | 40.7229  | 489.816  | 300.6838  | 539.259  | 553.4189 | 545.9227 | -1.04674 | 1.23E-08 | -0.68136 | 0.00048  | -0.26676 | 0.417269 |
| AT2G25670 | AT2G25670 | 95.07677 | 893.3073 | 981.1926 | 1130.019 | 1274.587 | 1044.689 | 957.4778 | 1050.839 | 1594.21   | 936.7612 | 913.9394 | 893.9873 | 0.277891 | 0.163995 | 0.338666 | 0.09452  | -0.0605  | 0.89016  |
| AT2G25680 | MOT1      | 27.34479 | 26.76369 | 27.04074 | 25.56977 | 18.54908 | 19.93682 | 22.23259 | 17.26224 | 39.04984  | 21.10978 | 29.26735 | 20.71813 | -0.29189 | 0.496742 | -0.03807 | 0.943277 | -0.18613 | 0.824654 |
| AT2G25685 | SCRL17    | 0        | 0        | 0        | 0        | 0        | 0        | 0        | 0        | 0         | 0        | 0        | 0        | #N/A     | #N/A     | #N/A     | #N/A     | #N/A     | #N/A     |
| AT2G25687 | AT2G25687 | 0        | 0        | 0        | 0        | 0        | 0        | 0        | 0        | 0         | 0        | 0        | 0        | #N/A     | #N/A     | #N/A     | #N/A     | #N/A     | #N/A     |
| AT2G25690 | AT2G25690 | 51.12287 | 67.80135 | 57.94445 | 45.77813 | 49.68505 | 53.8294  | 37.35075 | 48.55005 | 40.02609  | 56.6126  | 45.23135 | 62.15439 | -0.23103 | 0.432932 | -0.45815 | 0.121369 | -0.07862 | 0.900046 |
| AT2G25697 | AT2G25697 | 0        | 0        | 0        | 0        | 0        | 0        | 0        | 0        | 0         | 0        | 0        | 0        | #N/A     | #N/A     | #N/A     | #N/A     | #N/A     | #N/A     |
| AT2G25700 | ASK3      | 1.188904 | 0        | 1.287654 | 2.062708 | 0        | 0.996841 | 1.778607 | 0        | 0.972646  | 1.919071 | 0        | 1.035907 | 0.087251 | 0.911286 | 0.022622 | 0.97784  | 0.063521 | NA       |
| AT2G25710 | HCS1      | 117.7015 | 215.8938 | 145.5049 | 181.4629 | 182.1785 | 176.4408 | 207.2077 | 178.0168 | 150.3419  | 162.1615 | 114.4087 | 200.9659 | 0.180775 | 0.537003 | 0.169378 | 0.589984 | 0.015816 | 0.983524 |
| AT2G25720 | AT2G25720 | 64.20081 | 67.80135 | 69.53333 | 113.0019 | 113.2819 | 73.76622 | 91.59826 | 75.5223  | 153.2706  | 84.43914 | 115.7391 | 72.51346 | 0.549586 | 0.077207 | 0.629267 | 0.048609 | 0.40034  | 0.441758 |
| AT2G25730 | AT2G25730 | 574.2406 | 496.0204 | 513.7741 | 505.2091 | 444.5155 | 709.7506 | 1028.035 | 1251.512 | 630.6549  | 522.9469 | 544.1066 | 563.5332 | 0.060467 | 0.846423 | 0.843777 | 0.000339 | 0.039008 | 0.951161 |
| AT2G25735 | AT2G25735 | 30.9115  | 55.31163 | 46.35556 | 201.6712 | 226.5638 | 258.1818 | 279.2413 | 250.3025 | 486.1705  | 33.58375 | 61.19536 | 53.86714 | 2.228878 | 4.04E-15 | 2.770422 | 5.31E-23 | 0.147564 | 0.841345 |
| AT2G25737 | AT2G25737 | 58.25629 | 89.2123  | 72.10864 | 77.53413 | 70.22153 | 88.71883 | 54.24751 | 64.7334  | 59.55101  | 75.80331 | 69.17737 | 72.51346 | 0.116297 | 0.688228 | -0.26989 | 0.344319 | 0.011181 | 0.987638 |
| AT2G25740 | AT2G25740 | 128.4016 | 105.2705 | 144.2173 | 135.2723 | 138.4557 | 165.4756 | 155.2621 | 172.6224 | 115.197   | 112.2657 | 150.3277 | 107.7343 | 0.193607 | 0.483855 | 0.122991 | 0.428986 | -0.04592 | 0.936834 |
| AT2G25760 | AT2G25760 | 511.2287 | 504.9416 | 422.3506 | 413.2404 | 308.7097 | 374.8121 | 416.194  | 442.3449 | 377.8072  | 433.7101 | 456.3046 | 404.0035 | -0.38137 | 0.016893 | -0.21418 | 0.236044 | -0.15017 | 0.612836 |
| AT2G25770 | AT2G25770 | 1.188904 | 1.784246 | 0        | 2.886909 | 5.962205 | 0.996841 | 3.557214 | 5.39445  | 11.71495  | 0        | 0        | 1.035907 | 0.784334 | 0.255222 | 1.46075  | 0.02481  | -0.31661 | NA       |
| AT2G25780 | AT2G25780 | 1.188904 | 1.784246 | 0        | 2.062708 | 1.987402 | 0.993682 | 5.57214  | 2.15778  | 6.83372   | 0.995936 | 0        | 0        | 0.492919 | 0.561695 | 1.060769 | 0.119391 | -0.32778 | NA       |
| AT2G25790 | AT2G25790 | 97.49012 | 49.95889 | 42.49259 | 43.30364 | 34.4483  | 61.80413 | 96.34048 | 100.3368 | 88.83389  | 50.85539 | 38.57969 | 68.29802 | -0.44647 | 0.205364 | 0.538468 | 0.126749 | -0.27162 | 0.672425 |
| AT2G25800 | AT2G25800 | 458.9169 | 413.9451 | 339.9407 | 211.1568 | 186.1533 | 251.2023 | 243.6692 | 299.9314 | 215.7504  | 288.8202 | 299.3251 | 308.7001 | -0.88986 | 3.36E-07 | -0.66273 | 0.000282 | -0.46264 | 0.1045   |
| AT2G25810 | TP4-1     | 7.133424 | 5.352738 | 3.862963 | 9.073143 | 5.299738 | 6.977885 | 4.446517 | 6.47334  | 7.809968  | 1.919071 | 6.51672  | 5.179533 | 0.309367 | 0.644382 | 0.12907  | 0.87085  | -0.21393 | NA       |
| AT2G25820 | ERF04     | 5.94452  | 3.568492 | 7.725926 | 2.886909 | 7.28714  | 0.996841 | 0.889303 | 2.15778  | 0.809968  | 4.797678 | 7.982004 | 8.287522 | -0.40541 | 0.568438 | -0.44299 | 0.554668 | 0.180179 | NA       |
| AT2G25830 | AT2G25830 | 321.0041 | 392.5341 | 366.9815 | 285.3916 | 241.8006 | 275.1281 | 287.245  | 318.2725 | 345.5911  | 379.9761 | 403.0912 | 369.8186 | -0.41678 | 0.004897 | -0.17705 | 0.308872 | 0.096233 | 0.754476 |
| AT2G25840 | OVA4      | 380.4493 | 381.8287 | 360.5432 | 266.8329 | 259.6872 | 252.2007 | 359.2786 | 266.4858 | 313.275   | 493.2013 | 501.5359 | 458.9662 | -0.51767 | 0.000621 | -0.24989 | 0.120784 | 0.368601 | 0.061365 |
| AT2G25850 | PAP5      | 387.5827 | 333.654  | 319.3383 | 383.1341 | 376.9439 | 416.6794 | 50.8769  | 461.7649 | 356.2227  | 346.3924 | 409.7429 | 333.5619 | 0.169308 | 0.336707 | 0.496367 | 0.001694 | 0.058955 | 0.874312 |
| AT2G25870 | AT2G25870 | 695.5088 | 708.3457 | 749.4148 | 48.1894  | 398.8053 | 528.3256 | 576.2687 | 613.8884 | 592.5313  | 748.4378 | 831.4587 | 821.4739 | -0.67799 | 2.04E-07 | -0.26972 | 0.068562 | 0.154504 | 0.528979 |
| AT2G25880 | AtAUER    | 57.06739 | 42.8219  | 50.21852 | 87.34452 | 104.6698 | 86.72515 | 51.3682  | 63.65451 | 68.3372   | 71.96517 | 66.5167  | 70.44164 | 0.824745 | 0.000238 | 0.282485 | 0.334254 | 0.441751 | 0.258363 |
| AT2G25890 | AT2G25890 | 0        | 0        | 0        | 0.412416 | 1.324935 | 0        | 0        | 0        | 0         | 0        | 0        | 0        | 0.293846 | NA       | 0        | NA       | 0        | NA       |
| AT2G25900 | ATCTH     | 1839.234 | 2216.034 | 2002.303 | 1055.784 | 1063.922 | 1140.386 | 975.5659 | 1017.393 | 937.1962  | 1698.378 | 1902.378 | 1513.459 | -0.88431 | 4.74E-14 | -1.03556 | 1.23E-18 | -0.24128 | 0.210848 |
| AT2G25910 | AT2G25910 | 511.2287 | 479.9622 | 522.7877 | 652.029  | 671.0793 | 607.076  | 518.4639 | 600.9417 | 652.1323  | 554.6116 | 445.6619 | 433.0089 | 0.345223 | 0.02136  | 0.200841 | 0.18735  | -0.07723 | 0.813188 |
| AT2G25920 | AT2G25920 | 99.86793 | 121.3287 | 114.6012 | 132.7978 | 128.5187 | 124.6051 | 124.5025 | 140.2557 | 113.2445  | 104.5894 | 123.7211 | 98.41112 | 0.208472 | 0.326318 | 0.172784 | 0.425877 | -0.03816 | 0.940821 |
| AT2G25930 | ELF3      | 310.3039 | 317.5958 | 329.6395 | 458.1937 | 437.2284 | 532.313  | 780.8085 | 940.792  | 461.7644  | 335.8375 | 407.0822 | 335.6337 | 0.554271 | 0.016696 |          |          |          |          |



|           |           |          |          |          |          |          |          |          |          |          |          |          |          |          |          |           |          |          |          |
|-----------|-----------|----------|----------|----------|----------|----------|----------|----------|----------|----------|----------|----------|----------|----------|----------|-----------|----------|----------|----------|
| AT2G27340 | AT2G27340 | 120.0793 | 87.42806 | 109.4506 | 108.8777 | 96.72022 | 118.6241 | 123.6132 | 83.07453 | 64.43224 | 111.3061 | 110.4177 | 94.26749 | 0.01797  | 0.958316 | -0.22076  | 0.472    | -0.0154  | 0.983686 |
| AT2G27350 | AT2G27350 | 374.5047 | 399.6711 | 472.5691 | 456.544  | 386.8809 | 460.5404 | 492.6741 | 477.9482 | 344.6148 | 390.531  | 387.1272 | 397.7881 | 0.062625 | 0.776918 | 0.075281  | 0.745072 | -0.0836  | 0.831469 |
| AT2G27360 | AT2G27360 | 109.3792 | 90.99655 | 130.0531 | 110.5274 | 113.2819 | 104.6683 | 80.92662 | 67.97007 | 60.52725 | 119.942  | 99.77505 | 112.9138 | -0.01594 | 0.955072 | -0.64496  | 0.003529 | 0.003717 | 0.995116 |
| AT2G27370 | CASP3     | 1.188904 | 0        | 0        | 0        | 0        | 0.662467 | 0.996841 | 0        | 0        | 0.976246 | 0.959536 | 0        | 0.044508 | NA       | -0.05633  | NA       | -0.04546 | NA       |
| AT2G27375 | AT2G27375 | 0        | 0        | 0        | 0        | 0        | 0        | 0        | 0        | 0        | 0        | 0        | 0        | 0.128567 | NA       | 0         | NA       | 0        | NA       |
| AT2G27380 | EPRI      | 2.377808 | 0        | 0        | 0        | 0        | 0        | 0        | 1.07889  | 0        | 0        | 0.959536 | 0        | -0.47833 | NA       | -0.23024  | NA       | 0.09385  | NA       |
| AT2G27385 | AT2G27385 | 1508.719 | 1925.201 | 1861.948 | 1227.761 | 1163.293 | 1145.37  | 1498.476 | 1475.921 | 1681.096 | 2410.353 | 2865.539 | 2190.942 | -0.57271 | 4.79E-05 | -0.18205  | 0.278033 | 0.489573 | 0.006028 |
| AT2G27389 | AT2G27389 | 1.188904 | 0        | 1.287654 | 1.686234 | 2.649869 | 3.987363 | 3.557214 | 3.23667  | 4.88123  | 0        | 0        | 0        | 1.15061  | 0.076609 | 0.988637  | 0.153156 | -0.51545 | NA       |
| AT2G27390 | AT2G27390 | 0        | 0        | 0        | 0        | 0        | 0        | 0        | 0        | 0        | 0        | 0        | 0        | #N/A     | #N/A     | #N/A      | #N/A     | #N/A     | #N/A     |
| AT2G27395 | AT2G27395 | 0        | 0        | 0        | 0        | 0        | 0        | 0        | 0        | 0        | 0        | 0        | 0        | #N/A     | #N/A     | #N/A      | #N/A     | #N/A     | #N/A     |
| AT2G27400 | TAS1A     | 64.20081 | 60.66437 | 75.97161 | 124.5495 | 153.0299 | 105.6651 | 146.7351 | 92.78453 | 134.7219 | 70.0461  | 137.0244 | 84.94434 | 0.879864 | 0.001584 | 0.845629  | 0.003326 | 0.488122 | 0.286849 |
| AT2G27402 | AT2G27402 | 263.9367 | 256.9314 | 311.6124 | 14.84696 | 19.87402 | 23.92418 | 30.23632 | 20.49891 | 27.33489 | 262.9128 | 242.1208 | 283.8384 | -3.75007 | 9.47E-71 | -3.27754  | 7.6E-52  | -0.07471 | 0.858701 |
| AT2G27410 | AT2G27410 | 0        | 0        | 0        | 0        | 0        | 0.662467 | 0        | 0        | 0.889303 | 0        | 0        | 0        | 0.097058 | NA       | 0.130384  | NA       | 0        | NA       |
| AT2G27420 | AT2G27420 | 19.02246 | 19.62671 | 9.01358  | 1.649662 | 0.662467 | 0.996841 | 3.557214 | 1.07889  | 6.833722 | 22.06932 | 27.93701 | 17.61041 | -2.56427 | 5.9E-07  | -1.56416  | 0.003228 | 0.472084 | NA       |
| AT2G27430 | AT2G27430 | 1.188904 | 5.352738 | 6.438272 | 6.186234 | 2.649869 | 4.984204 | 6.225124 | 2.15778  | 9.76246  | 2.878607 | 2.660668 | 4.143626 | 0.097897 | 0.903273 | 0.366227  | 0.631464 | -0.22981 | NA       |
| AT2G27440 | AT2G27440 | 2.377808 | 0        | 0        | 0        | 0        | 0.412416 | 0        | 0        | 0.889303 | 0        | 0        | 0        | -0.33305 | NA       | -0.23237  | NA       | -0.18464 | NA       |
| AT2G27450 | CPA       | 359.049  | 419.2978 | 445.5284 | 387.6706 | 355.7449 | 374.8121 | 310.3669 | 318.2725 | 341.6861 | 423.1552 | 399.1002 | 397.7881 | -0.12469 | 0.416983 | -0.32842  | 0.021994 | -0.00069 | 0.998194 |
| AT2G27460 | AT2G27460 | 238.9697 | 192.6986 | 221.4765 | 209.9195 | 158.3297 | 226.2829 | 183.1965 | 185.5691 | 109.3396 | 205.3406 | 182.2558 | 191.6427 | -0.1379  | 0.60551  | -0.43978  | 0.070401 | -0.17021 | 0.702132 |
| AT2G27470 | NF-YB1    | 82.03437 | 99.91778 | 96.57408 | 105.166  | 109.9696 | 64.79465 | 78.25871 | 91.70564 | 151.3181 | 87.31774 | 77.15937 | 102.5447 | 0.024333 | 0.951021 | 0.198598  | 0.579442 | -0.04964 | 0.948618 |
| AT2G27480 | CMIL48    | 24.96698 | 24.97944 | 19.31482 | 30.51875 | 25.83622 | 30.90206 | 37.35075 | 34.52448 | 42.95482 | 29.7456  | 27.93701 | 30.04129 | 0.603708 | 0.407407 | 0.683262  | 0.05007  | 0.318615 | 0.613585 |
| AT2G27490 | COAE      | 93.92341 | 155.2294 | 118.4642 | 136.0971 | 131.1685 | 133.5767 | 125.3918 | 116.5201 | 168.8906 | 111.3061 | 98.44471 | 96.33931 | 0.140046 | 0.594852 | 0.174319  | 0.524979 | -0.23471 | 0.575777 |
| AT2G27500 | AT2G27500 | 189.0357 | 248.0102 | 211.1753 | 226.0037 | 253.725  | 381.79   | 735.454  | 589.0739 | 473.4793 | 286.9012 | 259.4151 | 248.6176 | 0.390791 | 0.111399 | 1.427138  | 3.75E-11 | 0.288419 | 0.483114 |
| AT2G27505 | AT2G27505 | 1.188904 | 5.352738 | 0        | 2.474493 | 1.987402 | 1.993682 | 2.66791  | 2.15778  | 2.928738 | 0        | 1.330334 | 2.071813 | 0.090919 | 0.915186 | 0.217719  | 0.799175 | -0.32865 | NA       |
| AT2G27510 | FD3       | 93.92341 | 92.78079 | 114.6012 | 127.024  | 110.632  | 109.6525 | 121.8346 | 98.17898 | 178.653  | 107.468  | 122.3907 | 120.1652 | 0.198787 | 0.470513 | 0.387333  | 0.143503 | 0.20152  | 0.666446 |
| AT2G27520 | AT2G27520 | 0        | 0        | 0        | 0.412416 | 0        | 0        | 0.889303 | 0        | 0        | 0.976246 | 0        | 0        | 0.205489 | NA       | 0.157461  | NA       | 0.204051 | NA       |
| AT2G27530 | RPL10AB   | 2812.947 | 3122.431 | 3490.831 | 3413.976 | 3747.577 | 3162.976 | 3001.399 | 2915.161 | 3561.345 | 2888.202 | 2507.68  | 3417.456 | 0.129613 | 0.475481 | 0.007882  | 0.971973 | -0.09491 | 0.770545 |
| AT2G27535 | AT2G27535 | 0        | 0        | 0        | 0        | 0        | 0        | 0        | 0        | 0        | 0.976246 | 0        | 0        | 0.16673  | NA       | 0.74584   | NA       | 0        | NA       |
| AT2G27540 | AT2G27540 | 0        | 0        | 0        | 0        | 0        | 0        | 0        | 0        | 0        | 0        | 0        | 0        | #N/A     | #N/A     | #N/A      | #N/A     | #N/A     | #N/A     |
| AT2G27550 | CEN       | 1.188904 | 1.784246 | 0        | 0        | 0        | 0        | 1.993682 | 0        | 0        | 0        | 0        | 0        | -0.12191 | NA       | -0.43872  | NA       | -0.42869 | NA       |
| AT2G27560 | AT2G27560 | 0        | 0        | 0        | 0        | 0        | 0        | 0        | 0        | 0        | 0        | 0        | 0        | #N/A     | #N/A     | #N/A      | #N/A     | #N/A     | #N/A     |
| AT2G27570 | SOT4      | 0        | 0        | 0        | 0        | 0        | 0        | 0        | 0        | 0        | 0        | 0        | 0        | #N/A     | #N/A     | #N/A      | #N/A     | #N/A     | #N/A     |
| AT2G27580 | SAP3      | 129.5905 | 99.91778 | 117.1765 | 136.922  | 146.4053 | 120.6177 | 106.7164 | 90.62675 | 202.0829 | 115.1443 | 125.0514 | 82.87252 | 0.206049 | 0.53781  | 0.188632  | 0.600912 | -0.1052  | 0.875399 |
| AT2G27590 | AT2G27590 | 65.60108 | 76.72258 | 77.25926 | 138.984  | 115.2693 | 99.68408 | 93.37687 | 91.70564 | 76.14719 | 73.31774 | 71.83803 | 82.87252 | 0.558314 | 0.011906 | 0.115646  | 0.699428 | 0.015968 | 0.98194  |
| AT2G27600 | SKD1      | 1119.948 | 1009.883 | 911.6593 | 892.4673 | 885.0563 | 918.0044 | 813.7127 | 843.6919 | 663.8473 | 808.8885 | 828.7981 | 840.1202 | -0.1732  | 0.229124 | -0.38628  | 0.00424  | -0.29305 | 0.130517 |
| AT2G27610 | PCMP-H60  | 19.02246 | 7.136984 | 11.58889 | 11.54764 | 13.24935 | 15.94945 | 8.003731 | 14.02557 | 12.6912  | 9.595356 | 6.65167  | 20.71813 | 0.038362 | 0.952704 | -0.14567  | 0.826742 | -0.04316 | NA       |
| AT2G27630 | AT2G27630 | 2.377808 | 0        | 7.725926 | 2.869099 | 2.649869 | 0.996841 | 6.225124 | 4.31556  | 1.952492 | 4.797678 | 1.330334 | 3.10772  | -0.36704 | 0.6251   | 0.154482  | 0.858513 | -0.09004 | NA       |
| AT2G27650 | AT2G27650 | 0        | 1.784246 | 0        | 0.412416 | 0        | 0        | 0        | 0        | 0.976246 | 0.959536 | 1.330334 | 0        | -0.21423 | NA       | -0.09554  | NA       | 0.123134 | NA       |
| AT2G27660 | AT2G27660 | 3.566112 | 5.352738 | 2.575309 | 118.3633 | 100.0326 | 142.5482 | 59.58333 | 65.81229 | 57.59851 | 4.797678 | 3.991002 | 3.10772  | 4.237458 | 5.93E-28 | 3.282051  | 1.65E-16 | -0.02699 | 0.98603  |
| AT2G27670 | AT2G27670 | 0        | 0        | 0        | 0        | 0        | 0        | 0.889303 | 0        | 0        | 0        | 0        | 0        | 0        | NA       | 0         | NA       | 0        | NA       |
| AT2G27680 | AT2G27680 | 1386.262 | 1580.842 | 1685.54  | 1360.971 | 1163.955 | 1173.282 | 1743.035 | 1700.331 | 1579.566 | 2075.476 | 1975.546 | 1861.524 | -0.32544 | 0.009365 | 0.110137  | 0.46658  | 0.343126 | 0.037185 |
| AT2G27690 | CYP94C1   | 11.88904 | 12.48972 | 18.02716 | 45.36571 | 39.08557 | 61.80413 | 56.91542 | 48.55005 | 56.62227 | 10.55489 | 10.64267 | 6.215439 | 1.601511 | 3.35E-06 | 1.783236  | 4.12E-07 | -0.53954 | 0.464795 |
| AT2G27700 | AT2G27700 | 1.188904 | 0        | 0        | 0        | 0        | 0        | 0.889303 | 1.07889  | 0        | 0        | 0        | 0        | -0.26887 | NA       | 0.130815  | NA       | -0.23129 | NA       |
| AT2G27710 | RPB2B     | 939.2341 | 785.0683 | 909.084  | 1444.279 | 1346.133 | 843.3273 | 665.199  | 633.3084 | 1537.587 | 766.669  | 980.4561 | 1129.138 | 0.421265 | 0.301571 | 0.096476  | 0.850438 | 0.114706 | 0.403425 |
| AT2G27720 | RP22A     | 947.5564 | 765.4415 | 835.6877 | 1254.568 | 1216.29  | 800.4631 | 725.6716 | 617.125  | 1920.276 | 756.1141 | 686.4523 | 1017.26  | 0.315431 | 0.517909 | 0.311842  | 0.543252 | -0.04482 | 0.969226 |
| AT2G27730 | AT2G27730 | 433.9499 | 529.9211 | 533.0889 | 937.833  | 1091.746 | 800.6431 | 637.6306 | 596.6261 | 1151.397 | 709.0968 | 787.5577 | 650.9439 | 0.886314 | 0.00012  | 0.648374  | 0.00772  | 0.500946 | 0.154855 |
| AT2G27740 | AT2G27740 | 27.34479 | 26.76369 | 39.91728 | 24.74493 | 23.84882 | 14.95261 | 16.00746 | 10.7889  | 37.34489 | 47.42189 | 42.57069 | 30.04129 | -0.48923 | 0.217972 | -0.7143   | 0.083311 | 0.197153 | 0.800512 |
| AT2G27750 | AT2G27750 | 0        | 0        | 1.287654 | 0        | 0        | 0        | 0        | 0        | 0        | 0        | 0        | 0        | -0.2184  | NA       | -0.20558  | NA       | -0.19918 | NA       |
| AT2G27760 | IP2T      | 67.76752 | 57.09587 | 73.3963  | 72.17273 | 68.23413 | 63.79781 | 92.48756 | 73.36452 | 56.62227 | 70.0461  | 54.54369 | 74.58527 | 0.037576 | 0.912123 | 0.153124  | 0.6393   | 0.005372 | 0.99372  |
| AT2G27770 | AT2G27770 | 179.5245 | 208.7568 | 155.8062 | 132.7978 | 147.7302 | 131.583  | 183.1965 | 135.9401 | 142.5319 | 178.4736 | 258.0848 | 182.3195 | -0.38223 | 0.080441 | -0.21983  | 0.380542 | 0.180313 | 0.652681 |
| AT2G27775 | AT2G27775 | 43.98945 | 37.46917 | 42.49259 | 42.4788  | 54.98478 | 29.90522 | 41.79726 | 32.3667  | 56.62227 | 44.13864 | 50.55269 | 44.54398 | 0.045834 | 0.912123 | 0.068036  | 0.877723 | 0.144029 | 0.835858 |
| AT2G27780 | AT2G27780 | 0        | 0        | 0        | 0.412416 | 0        | 0        | 0.889303 | 0        | 0        | 0.976246 | 0        | 0        | 0.064654 | NA       | 0.1330334 | NA       | 0.193679 | NA       |
| AT2G27790 | AT2G27790 | 16.64466 | 23.1952  | 23.17778 | 37.94223 | 43.06037 | 27.91154 | 27.56841 | 28.05114 | 51.74104 | 23.98839 | 18.62468 | 47.6517  | 0.716859 | 0.082329 | 0.684698  | 0.119072 | 0.471026 | 0.514465 |
| AT2G27800 | AT2G27800 | 47.55616 | 71.36984 | 68.24568 | 54.85127 | 46.37271 | 61.80413 | 66.69756 | 63.65451 | 65.40848 | 66.20796 | 67.84703 | 78.7289  | 0.180788 | 0.522161 | 0.079317  | 0.818148 | 0.952081 | 0.693477 |
| AT2G27810 | NAT12     | 336.4598 | 212.3253 | 218.9012 | 146.8199 | 136.4683 | 210.3334 | 143.1779 | 162.9124 | 153.2706 | 181.3522 | 248.7725 | 193.7145 | -0.63048 | 0.007155 | -0.72066  | 0.002582 | -0.29903 | 0.466341 |
| AT2G27820 | ADT3      | 361.4268 | 319.38   | 312.9    | 204.5581 | 196.7528 | 207.3429 | 141.3993 | 145.6501 | 164.9856 | 290.7393 |          |          |          |          |           |          |          |          |

|           |           |          |           |          |          |          |          |          |          |          |          |          |          |          |          |           |          |          |          |
|-----------|-----------|----------|-----------|----------|----------|----------|----------|----------|----------|----------|----------|----------|----------|----------|----------|-----------|----------|----------|----------|
| AT2G28290 | SYD       | 2073.448 | 1347.106  | 1142.149 | 560.8852 | 527.9864 | 741.6495 | 723.893  | 966.6854 | 571.1039 | 1171.593 | 1210.604 | 1069.056 | -1.2692  | 3.07E-08 | -0.97466  | 3.66E-05 | -0.38832 | 0.31698  |
| AT2G28305 | LOG1      | 235.403  | 226.5992  | 251.0926 | 271.3664 | 237.1633 | 268.1502 | 252.5622 | 233.0402 | 308.4937 | 259.0746 | 296.6645 | 255.8689 | 0.118787 | 0.535966 | 0.15092   | 0.494968 | 0.177322 | 0.557232 |
| AT2G28310 | AT2G28310 | 277.0146 | 290.8321  | 336.0778 | 274.2564 | 225.9013 | 269.147  | 241.0012 | 223.3302 | 230.3941 | 290.7393 | 284.6915 | 295.2334 | -0.22943 | 0.151566 | -0.37375  | 0.019446 | -0.05331 | 0.879935 |
| AT2G28315 | AT2G28315 | 22.58917 | 21.41095  | 21.89012 | 11.13522 | 4.637271 | 9.968408 | 7.114428 | 11.86779 | 16.59618 | 24.94793 | 27.93701 | 20.71813 | -1.16224 | 0.00606  | -0.7807   | 0.094435 | 0.142324 | 0.880174 |
| AT2G28320 | AT2G28320 | 215.1916 | 246.226   | 175.121  | 157.9552 | 147.7302 | 193.3871 | 165.4014 | 210.3835 | 107.3871 | 175.599  | 158.3097 | 205.1095 | -0.3382  | 0.194277 | -0.37977  | 0.161934 | -0.22355 | 0.625371 |
| AT2G28330 | AT2G28330 | 27.34479 | 35.68492  | 24.45623 | 39.5919  | 37.76063 | 35.88627 | 38.24005 | 38.84004 | 45.88356 | 30.52886 | 30.59768 | 44.54398 | 0.371102 | 0.29278  | 0.47517   | 0.193165 | 0.169488 | 0.815889 |
| AT2G28340 | GATA13    | 1.188904 | 0         | 0        | 0.412416 | 1.324935 | 0        | 0.889303 | 0        | 0.972646 | 0        | 0        | 1.035907 | 0.09132  | 0        | 0.102133  | 0        | -0.04711 | NA       |
| AT2G28350 | ARF10     | 99.86793 | 105.2705  | 86.27284 | 134.0351 | 139.1181 | 130.5861 | 105.8271 | 101.4157 | 124.9595 | 98.83217 | 99.77505 | 111.8779 | 0.467524 | 0.015909 | 0.190734  | 0.425699 | 0.095977 | 0.833777 |
| AT2G28355 | LCR5      | 0        | 1.784246  | 0        | 0        | 0        | 0        | 0        | 0.889303 | 0        | 0        | 0        | 3.991002 | -0.28795 | 0        | -0.09526  | NA       | 0.272547 | NA       |
| AT2G28360 | AT2G28360 | 260.37   | 237.3047  | 252.3803 | 128.9927 | 128.6142 | 226.2829 | 291.6915 | 251.3814 | 171.8193 | 224.5313 | 247.4421 | 255.8689 | -0.17527 | 0.426609 | -0.06854  | 0.795758 | -0.04562 | 0.925359 |
| AT2G28370 | AT2G28370 | 473.1838 | 567.3902  | 561.4173 | 527.4795 | 549.8478 | 509.3856 | 464.2164 | 502.7627 | 630.6549 | 553.6521 | 572.0436 | 423.6858 | -0.01081 | 0.963282 | -0.00202  | 0.993405 | -0.04651 | 0.911596 |
| AT2G28380 | DRB2      | 417.3053 | 331.8698  | 306.4617 | 217.7554 | 270.9491 | 252.2007 | 220.5473 | 261.0914 | 205.9879 | 283.063  | 301.9858 | 292.1256 | -0.50878 | 0.002889 | -0.61155  | 0.000428 | -0.26646 | 0.346812 |
| AT2G28390 | AT2G28390 | 306.7372 | 303.3218  | 280.7086 | 240.8507 | 235.1759 | 228.2765 | 238.3333 | 264.328  | 159.1281 | 314.7277 | 301.9858 | 286.9461 | -0.32932 | 0.084464 | -0.41994  | 0.031156 | 0.021271 | 0.96566  |
| AT2G28400 | AT2G28400 | 29.7226  | 30.33218  | 28.3284  | 81.24587 | 64.25933 | 87.72199 | 55.13682 | 49.62894 | 95.67211 | 20.15025 | 14.63367 | 18.64632 | 1.308291 | 2.26E-05 | 1.101336  | 0.000689 | -0.63117 | 0.271055 |
| AT2G28401 | AT2G28401 | 0        | 0         | 0        | 0        | 0        | 0        | 0        | 0.889303 | 0        | 0        | 0        | 0        | 0        | NA       | 0         | NA       | 0        | NA       |
| AT2G28405 | LCR32     | 0        | 0         | 0        | 0        | 0        | 0        | 0        | 0        | 0        | 0        | 0        | 0        | #N/A     | #N/A     | #N/A      | #N/A     | #N/A     | #N/A     |
| AT2G28410 | AT2G28410 | 118.8904 | 99.91778  | 136.4914 | 68.04857 | 70.884   | 70.7757  | 56.91542 | 50.70783 | 85.90965 | 162.1615 | 187.5771 | 126.3806 | -0.74158 | 0.001888 | -0.8457   | 0.000641 | 0.396719 | 0.292875 |
| AT2G28420 | AT2G28420 | 2.377808 | 8.92123   | 5.150617 | 8.248311 | 10.59948 | 16.94629 | 5.335821 | 8.63112  | 11.71495 | 15.35257 | 15.96401 | 9.323159 | 0.855206 | 0.118168 | 0.49579   | 0.440412 | 1.039431 | NA       |
| AT2G28425 | AT2G28425 | 3.566712 | 1.7136984 | 3.862963 | 4.536571 | 9.274542 | 3.987363 | 4.446517 | 2.15778  | 3.904984 | 4.797678 | 6.65167  | 4.143626 | 0.262288 | 0.714242 | -0.26746  | 0.732724 | 0.090132 | NA       |
| AT2G28430 | AT2G28430 | 112.9459 | 119.5445  | 148.0802 | 190.1236 | 211.3271 | 127.5956 | 120.056  | 98.17898 | 294.8263 | 189.0285 | 186.2468 | 198.8941 | 0.441447 | 0.222788 | 0.396839  | 0.304347 | 0.54683  | 0.30483  |
| AT2G28440 | AT2G28440 | 2.377808 | 1.7136984 | 3.862963 | 5.737818 | 6.624673 | 9.968408 | 0.889303 | 7.55223  | 7.809968 | 7.676285 | 7.982004 | 9.323159 | 0.529352 | 0.412294 | 0.194306  | 0.806699 | 0.676255 | NA       |
| AT2G28450 | AT2G28450 | 223.5139 | 239.2089  | 206.0247 | 150.5317 | 122.5564 | 155.5072 | 164.5211 | 207.1469 | 106.4108 | 169.8378 | 156.9794 | 182.3195 | -0.61947 | 0.005723 | -0.46788  | 0.052723 | -0.37564 | 0.299162 |
| AT2G28460 | AT2G28460 | 20.21137 | 23.1952   | 14.1642  | 19.79595 | 20.53649 | 18.93997 | 18.67537 | 17.26224 | 18.54867 | 31.66468 | 14.63367 | 21.75404 | 0.055686 | 0.9145   | -0.05451  | 0.922958 | 0.257946 | 0.748095 |
| AT2G28470 | BGAL8     | 1557.464 | 1259.678  | 1337.873 | 391.3824 | 355.7449 | 413.6889 | 339.7139 | 372.217  | 240.1565 | 1567.881 | 1603.052 | 1391.222 | -1.80815 | 9.77E-32 | -2.0865   | 1.07E-40 | 0.131326 | 0.687724 |
| AT2G28480 | AT2G28480 | 97.49012 | 110.6233  | 108.163  | 123.3123 | 135.8058 | 129.5893 | 141.3993 | 126.2301 | 149.3656 | 96.9131  | 106.4267 | 129.4883 | 0.292396 | 0.156964 | 0.395934  | 0.059845 | 0.076461 | 0.86931  |
| AT2G28490 | AT2G28490 | 0        | 0         | 0        | 0        | 0        | 0        | 1.778607 | 0        | 0.972646 | 0        | 0        | 1.035907 | 0        | NA       | 0.463781  | NA       | 0.176341 | NA       |
| AT2G28500 | LB11      | 13.07794 | 3.568492  | 15.45185 | 14.43455 | 21.86142 | 21.9305  | 41.79726 | 44.23449 | 39.04984 | 7.676285 | 13.30334 | 7.251346 | 0.639221 | 0.15139  | 1.684871  | 2.23E-05 | -0.25036 | 0.796296 |
| AT2G28507 | AT2G28507 | 0        | 0         | 0        | 0        | 0        | 0        | 0        | 0        | 0        | 0        | 0        | 0        | #N/A     | #N/A     | #N/A      | #N/A     | #N/A     | #N/A     |
| AT2G28510 | DOF1      | 105.8125 | 90.99655  | 100.437  | 144.7579 | 125.8688 | 133.5767 | 144.0672 | 128.3879 | 106.4108 | 77.72239 | 101.1054 | 107.7343 | 0.42818  | 0.045519 | 0.334365  | 0.158205 | -0.06419 | 0.902029 |
| AT2G28520 | VHA-A1    | 331.7042 | 274.7739  | 276.8457 | 236.3141 | 233.8509 | 334.9385 | 297.0274 | 258.9336 | 194.273  | 243.722  | 240.7904 | 257.9407 | -0.14105 | 0.560712 | -0.23085  | 0.339472 | -0.24591 | 0.50255  |
| AT2G28540 | AT2G28540 | 389.9605 | 367.5547  | 328.3519 | 255.6977 | 224.5764 | 269.147  | 319.2599 | 388.4004 | 243.0853 | 305.1323 | 315.2892 | 335.6337 | -0.52524 | 0.003987 | -0.18913  | 0.386568 | -0.17962 | 0.598351 |
| AT2G28550 | RAP2-7    | 731.1759 | 806.4792  | 876.8928 | 755.9577 | 668.4295 | 805.4473 | 582.4938 | 516.7883 | 425.6433 | 701.4205 | 725.032  | 748.9604 | -0.11372 | 0.51679  | -0.65189  | 8.85E-06 | -0.14789 | 0.595754 |
| AT2G28560 | RAD51B    | 8.322328 | 5.352738  | 3.862963 | 7.42348  | 2.649869 | 5.981045 | 4.446517 | 3.23667  | 0        | 2.878607 | 1.330334 | 9.323159 | -0.06275 | 0.940292 | -0.70353  | 0.325468 | -0.22289 | NA       |
| AT2G28570 | AT2G28570 | 22.58917 | 28.54794  | 34.76667 | 13.77468 | 184.1659 | 164.4787 | 196.5361 | 135.9401 | 225.5128 | 34.54328 | 29.26735 | 30.01429 | 2.355463 | 4.99E-19 | 2.551978  | 4.83E-22 | 0.112019 | 0.87895  |
| AT2G28580 | AT2G28580 | 26.15589 | 14.27397  | 20.60247 | 8.660727 | 3.12336  | 8.971567 | 8.893035 | 3.23667  | 6.833722 | 17.27164 | 22.61568 | 12.43088 | -1.31478 | 0.004518 | -1.37847  | 0.005012 | -0.22114 | NA       |
| AT2G28590 | AT2G28590 | 26.15589 | 26.76369  | 39.91728 | 36.70499 | 36.4357  | 46.85152 | 37.35073 | 33.44559 | 31.23987 | 32.62421 | 27.93701 | 35.22802 | 0.321459 | 0.348942 | 0.120031  | 0.780549 | 0.04035  | 0.963009 |
| AT2G28600 | AT2G28600 | 194.9802 | 155.2294  | 198.2988 | 154.6558 | 174.8914 | 164.4787 | 151.1816 | 151.0446 | 225.5128 | 165.9997 | 139.6851 | 198.8941 | -0.15517 | 0.537157 | -0.06064  | 0.83907  | -0.1189  | 0.796296 |
| AT2G28605 | PPD2      | 476.7505 | 460.3345  | 477.7198 | 401.2804 | 446.5029 | 363.8469 | 486.449  | 416.4515 | 589.6526 | 646.727  | 752.969  | 592.5385 | -0.21841 | 0.231136 | 0.075848  | 0.732436 | 0.482517 | 0.025385 |
| AT2G28610 | WOK3      | 2.377808 | 1.784246  | 0        | 2.062078 | 0.662467 | 3.987363 | 2.66791  | 3.23667  | 0        | 0.995936 | 5.321336 | 4.196262 | 0.236132 | 0.76761  | 0.179474  | 0.835055 | 0.584152 | NA       |
| AT2G28620 | AT2G28620 | 203.2036 | 142.7397  | 191.8605 | 176.5139 | 174.2289 | 218.3081 | 230.3296 | 238.4347 | 114.2208 | 261.9532 | 271.3881 | 248.6176 | 0.065889 | 0.842629 | 0.103447  | 0.762414 | 0.509596 | 0.181089 |
| AT2G28625 | AT2G28625 | 0        | 0         | 0        | 0        | 0        | 0        | 0        | 0        | 0        | 0        | 0        | 0        | #N/A     | #N/A     | #N/A      | #N/A     | #N/A     | #N/A     |
| AT2G28630 | KCS12     | 426.8165 | 424.6506  | 357.9679 | 402.93   | 492.8757 | 512.3762 | 446.4303 | 386.2426 | 511.5529 | 256.196  | 327.2622 | 342.8851 | 0.212607 | 0.278703 | 0.151372  | 0.487909 | -0.37761 | 0.161832 |
| AT2G28640 | ATEX070H5 | 0        | 0         | 0        | 0        | 0.662467 | 0        | 0.889303 | 0        | 0        | 0        | 0        | 0        | 0.097058 | NA       | 0.130384  | NA       | 0        | NA       |
| AT2G28650 | ATEX070H8 | 16.64466 | 26.76369  | 11.58889 | 13.60971 | 25.83622 | 14.95261 | 17.78607 | 23.73558 | 28.31113 | 17.27164 | 30.59768 | 22.78994 | 0.009907 | 0.986753 | 0.332042  | 0.5165   | 0.33323  | 0.685108 |
| AT2G28660 | AT2G28660 | 80.84547 | 82.07532  | 81.12222 | 106.8156 | 98.70762 | 107.6588 | 146.7351 | 118.6779 | 103.4821 | 53.734   | 50.55269 | 63.86714 | 0.350472 | 0.122404 | 0.584064  | 0.008472 | -0.59699 | 0.068271 |
| AT2G28670 | DIR10     | 4.755616 | 1.784246  | 3.862963 | 2.886909 | 2.649869 | 0.996841 | 1.778607 | 1.07889  | 0.972646 | 3.838143 | 2.660668 | 1.035907 | -0.3516  | 0.638116 | -0.7433   | 0.306639 | -0.28417 | NA       |
| AT2G28671 | AT2G28671 | 0        | 1.784246  | 0        | 2.062078 | 0        | 0        | 0.889303 | 3.23667  | 0        | 0        | 3.991002 | 1.035907 | 0.070018 | 0.925884 | 0.287133  | 0.681092 | 0.359017 | NA       |
| AT2G28680 | AT2G28680 | 3.566712 | 3.568492  | 0        | 0.824831 | 0        | 0        | 0.889303 | 0        | 1.952492 | 8.635821 | 1.330334 | 10.35907 | -0.91405 | 0.17258  | -0.49452  | 0.516361 | 0.975035 | NA       |
| AT2G28690 | AT2G28690 | 3.566712 | 5.352738  | 6.438272 | 2.062078 | 1.324935 | 1.993682 | 0        | 1.07889  | 2.928738 | 4.797678 | 6.65167  | 8.287252 | -0.93259 | 0.150655 | -1.07762  | 0.110333 | 0.926426 | NA       |
| AT2G28700 | AGL4      | 0        | 0         | 0        | 0        | 0        | 2.990522 | 0        | 1.07889  | 1.952492 | 0.995936 | 0        | 0        | 0.369045 | NA       | 0.403313  | NA       | 0.133506 | NA       |
| AT2G28710 | AT2G28710 | 7.133424 | 5.352738  | 6.438272 | 37.1174  | 36.4357  | 38.87679 | 18.67537 | 32.3667  | 45.88356 | 14.39303 | 17.29434 | 8.287252 | 2.111501 | 5.52E-07 | 0.1901858 | 1.28E-05 | 0.757975 | 0.319156 |
| AT2G28720 | AT2G28720 | 584.9407 | 685.1505  | 732.6753 | 864.8355 | 1022.187 | 678.8486 | 1203.228 | 819.9564 |          |          |          |          |          |          |           |          |          |          |

|           |           |          |          |          |           |          |          |          |          |          |          |          |          |          |           |          |           |           |          |
|-----------|-----------|----------|----------|----------|-----------|----------|----------|----------|----------|----------|----------|----------|----------|----------|-----------|----------|-----------|-----------|----------|
| AT2G29210 | AT2G29210 | 535.0068 | 503.1574 | 506.0482 | 495.3111  | 416.6919 | 464.5278 | 406.4117 | 488.7371 | 430.5245 | 429.872  | 445.6619 | 411.2549 | -0.16323 | 0.264977  | -0.22069 | 0.139211  | -0.26238  | 0.205441 |
| AT2G29220 | LECRK31   | 0        | 0        | 0        | 1.237247  | 0        | 1.993682 | 0.889303 | 0        | 0        | 0        | 1.330334 | 0        | 0.512019 | NA        | 0.136416 | NA        | 0.185664  | NA       |
| AT2G29230 | AT2G29230 | 1.188904 | 0        | 1.287654 | 0         | 0        | 0        | 1.778607 | 0        | 0        | 0        | 2.660668 | 0        | -0.46402 | NA        | -0.09432 | NA        | -0.01353  | NA       |
| AT2G29240 | AT2G29240 | 0        | 0        | 0        | 0         | 0        | 0        | 0        | 0        | 0        | 0        | 1.035907 | 0        | 0        | NA        | 0        | NA        | 0.172362  | NA       |
| AT2G29250 | LECRK32   | 0        | 0        | 0        | 0         | 0        | 0        | 0        | 2.15778  | 0        | 0        | 0        | 0        | 0        | 0         | 0.266481 | NA        | 0         | 0.76911  |
| AT2G29260 | AT2G29260 | 8.322238 | 16.05821 | 14.1642  | 34.64291  | 37.09817 | 32.89575 | 33.79353 | 40.99782 | 40.02609 | 7.676285 | 9.312338 | 13.46678 | 1.334536 | 0.000254  | 1.44788  | 9.99E-05  | -0.26204  | 0.76911  |
| AT2G29263 | AT2G29263 | 0        | 0        | 0        | 4.536571  | 3.132336 | 1.993682 | 0.889303 | 4.31556  | 4.88123  | 0.959536 | 1.330334 | 1.035907 | 1.294056 | 0.040633  | 1.228975 | 0.061458  | 0.458308  | NA       |
| AT2G29270 | AT2G29270 | 2.377808 | 0        | 1.287654 | 12.78488  | 12.78488 | 3.987363 | 5.52714  | 6.47334  | 10.73871 | 0.959536 | 0        | 3.10772  | 1.487666 | 0.015736  | 1.251456 | 0.056403  | -0.0248   | NA       |
| AT2G29280 | AT2G29280 | 0        | 0        | 0        | 0.412416  | 0        | 0.996841 | 0        | 0        | 0        | 0.959536 | 0        | 0        | 0.245807 | NA        | 0        | NA        | 0.171544  | NA       |
| AT2G29290 | AT2G29290 | 527.8734 | 613.7806 | 651.5531 | 254.4604  | 249.7502 | 233.2607 | 388.6256 | 416.4515 | 397.3321 | 742.6806 | 802.1914 | 772.7863 | -1.26088 | 3.14E-26  | -0.56914 | 5.01E-06  | 0.368016  | 0.023716 |
| AT2G29300 | AT2G29300 | 122.4571 | 124.8972 | 151.9432 | 34.23049  | 35.11077 | 29.90522 | 74.70149 | 63.65451 | 80.05217 | 203.4216 | 192.8984 | 202.0018 | -1.93163 | 8.83E-23  | -0.8464  | 2.03E-05  | 0.57309   | 0.017079 |
| AT2G29310 | AT2G29310 | 469.6171 | 467.4725 | 516.3494 | 283.3295  | 317.3218 | 258.1818 | 490.8955 | 391.637  | 479.3368 | 648.6461 | 557.4099 | 635.0933 | -0.74497 | 4.58E-07  | -0.09169 | 0.643882  | 0.383078  | 0.070998 |
| AT2G29320 | AT2G29320 | 234.2141 | 269.4212 | 251.0926 | 376.9478  | 412.7171 | 329.9543 | 353.9428 | 354.9548 | 371.9497 | 214.936  | 187.5771 | 232.0431 | 0.570174 | 0.000108  | 0.153343 | 0.000782  | -0.132541 | 0.372688 |
| AT2G29330 | TRI       | 0        | 0        | 0        | 0.824831  | 0.662467 | 0        | 1.778607 | 1.07889  | 0        | 0        | 1.330334 | 0        | 0.276569 | NA        | 0.478089 | NA        | 0.1936    | NA       |
| AT2G29340 | AT2G29340 | 196.1692 | 276.5581 | 212.463  | 566.2466  | 482.9386 | 353.8785 | 465.1057 | 377.6115 | 444.1919 | 219.7337 | 375.1542 | 272.4434 | 1.006582 | 8.66E-06  | 0.882232 | 0.000149  | 0.327595  | 0.4181   |
| AT2G29350 | SAG13     | 85.60108 | 87.42806 | 162.2444 | 2557.801  | 2520.026 | 2544.935 | 1630.983 | 1304.378 | 1071.918 | 84.43914 | 95.78405 | 71.47755 | 4.341737 | 1.02E-95  | 3.439909 | 4.98E-60  | -0.407    | 0.311768 |
| AT2G29360 | SDR       | 656.275  | 817.1847 | 790.6198 | 828.1305  | 893.0059 | 717.7254 | 779.9192 | 573.9694 | 657.9898 | 788.7383 | 683.7917 | 895.0232 | 0.108798 | 0.59447   | -0.16404 | 0.425767  | 0.066566  | 0.866158 |
| AT2G29370 | AT2G29370 | 1.188904 | 3.568492 | 1.287654 | 0.412416  | 0        | 0.662467 | 0        | 5.35821  | 9.710009 | 2.928738 | 0.959536 | 1.330334 | 3.10772  | -0.83698  | 0.220639 | -1.045825 | 0.127782  | -0.03354 |
| AT2G29380 | HA13      | 0        | 0        | 0        | 1.237247  | 2.649869 | 5.981045 | 2.66791  | 1.07889  | 0.976246 | 0        | 0        | 2.078113 | 1.206703 | 0.049942  | 0.684902 | 0.314685  | 0.305709  | NA       |
| AT2G29390 | SMO2-1    | 337.6487 | 283.0951 | 300.0235 | 263.946   | 245.1129 | 247.2165 | 235.6654 | 198.5157 | 247.9665 | 327.2016 | 320.6105 | 278.6589 | -0.28269 | 0.075879  | -0.42946 | 0.007261  | 0.002377  | 0.995969 |
| AT2G29400 | TOPP1     | 965.39   | 1052.705 | 999.2198 | 1467.375  | 1472.002 | 1671.702 | 1413.103 | 1497.499 | 1382.364 | 198.2318 | 197.9304 | 813.1866 | 0.606524 | 2.47E-08  | 0.505642 | 6.15E-06  | -0.16867  | 0.391263 |
| AT2G29410 | MTPB      | 11.88904 | 3.568492 | 7.725926 | 7.011065  | 7.725926 | 7.725926 | 5.35821  | 5.39445  | 12.6912  | 9.676285 | 9.312338 | 12.43088 | -0.10771 | 8.075081  | -0.03708 | 0.9561278 | 0.22317   | NA       |
| AT2G29420 | GSTU7     | 92.73451 | 103.4863 | 113.3136 | 143.933   | 164.9544 | 151.5198 | 147.6244 | 147.8079 | 300.6838 | 89.23681 | 85.14137 | 87.01615 | 0.544667 | 0.051474  | 0.901856 | 0.000821  | -0.22935  | 0.675122 |
| AT2G29430 | AT2G29430 | 1.188904 | 0        | 0        | 0.412416  | 0.662467 | 0        | 0.889303 | 0        | 0        | 0        | 0        | 0        | -0.00593 | NA        | -0.05489 | NA        | -0.23534  | NA       |
| AT2G29440 | GSTU6     | 11.88904 | 10.70548 | 20.60247 | 11.13522  | 9.274542 | 6.977885 | 10.41119 | 10.7889  | 19.52492 | 14.39303 | 18.62468 | 13.46678 | -0.54279 | 0.270892  | -0.54279 | 0.605508  | 0.046614  | NA       |
| AT2G29450 | GSTU5     | 738.3094 | 838.5956 | 861.4408 | 843.3899  | 872.4694 | 806.4442 | 1116.965 | 1126.361 | 1683.048 | 1136.09  | 1229.229 | 1094.953 | 0.048874 | 0.829124  | 0.674914 | 6.11E-05  | 0.495443  | 0.02743  |
| AT2G29452 | AT2G29452 | 0        | 0        | 0        | 0         | 0        | 0        | 0        | 0        | 0        | 0        | 0        | 0        | #N/A     | #N/A      | #N/A     | #N/A      | #N/A      | #N/A     |
| AT2G29460 | GSTU4     | 11.88904 | 14.27397 | 10.30123 | 230.9527  | 257.6998 | 254.1944 | 537.1393 | 477.9482 | 676.5385 | 13.4335  | 17.29434 | 7.251346 | 4.006924 | 6.2E-45   | 5.173371 | 2.68E-75  | -0.0102   | 0.992665 |
| AT2G29470 | GSTU3     | 1.188904 | 1.784246 | 9.01358  | 50.3147   | 50.34751 | 51.83572 | 38.24005 | 31.28781 | 33.19236 | 0        | 1.330334 | 0        | 3.072246 | 3.53E-13  | 2.517321 | 9.1E-09   | -1.14962  | 0.181799 |
| AT2G29480 | GSTU2     | 0        | 0        | 2.575309 | 10.7228   | 4.637271 | 7.97426  | 12.45025 | 5.39445  | 3.904984 | 0        | 1.330334 | 1.035907 | 1.615403 | 0.000858  | 1.505794 | 0.018615  | -0.13942  | NA       |
| AT2G29490 | GSTU1     | 8.322238 | 14.27397 | 23.17778 | 28.45667  | 42.39791 | 29.90522 | 44.46517 | 26.97225 | 43.93107 | 23.98839 | 26.60668 | 15.5386  | 1.00138  | 0.011284  | 1.186111 | 0.003022  | 0.441848  | 0.555797 |
| AT2G29500 | HSP17.6B  | 7.133424 | 7.136984 | 6.438272 | 6.186234  | 5.962205 | 1.993682 | 9.782338 | 10.7889  | 7.809968 | 18.23118 | 13.30334 | 7.251346 | -0.37157 | 0.554069  | 0.350342 | 0.596668  | 0.729252  | NA       |
| AT2G29510 | AT2G29510 | 665.7862 | 599.5067 | 569.1432 | 323.3338  | 335.2084 | 429.6384 | 440.2052 | 488.7371 | 307.5175 | 509.5134 | 457.6349 | 500.3429 | -0.7422  | 0.000046  | -0.55724 | 0.003639  | -0.31418  | 0.296514 |
| AT2G29520 | AT2G29520 | 0        | 0        | 0        | 0         | 0        | 0        | 0        | 0        | 0        | 0        | 0        | 0        | #N/A     | #N/A      | #N/A     | #N/A      | #N/A      | #N/A     |
| AT2G29525 | IPCS3     | 79.65656 | 92.78079 | 119.7519 | 92.38109  | 82.14594 | 92.70619 | 106.7164 | 96.0212  | 73.21845 | 108.4275 | 117.0694 | 72.51346 | -0.12434 | 0.684508  | -0.07792 | 0.821796  | 0.021798  | 0.976106 |
| AT2G29530 | TIMR10    | 64.20081 | 85.64381 | 105.5877 | 185.994   | 183.5034 | 121.6146 | 133.3955 | 112.2046 | 156.1994 | 101.7108 | 91.79304 | 98.41112 | 0.920528 | 0.000107  | 0.630559 | 0.014606  | 0.18842   | 0.711499 |
| AT2G29540 | ATRPC14   | 42.80054 | 49.95889 | 38.62963 | 134.4475  | 88.10815 | 77.75358 | 55.13682 | 51.78672 | 95.57709 | 47.01725 | 58.53469 | 52.83123 | 1.163647 | 0.000212  | 0.611334 | 0.079549  | 0.248632  | 0.702132 |
| AT2G29550 | TUB87     | 1159.181 | 1054.489 | 1099.657 | 913.5005  | 1022.187 | 925.0682 | 909.7575 | 937.5554 | 992.8422 | 1028.622 | 1024.357 | 1154     | -0.21185 | 0.069582  | -0.22223 | 0.067135  | -0.04766  | 0.85295  |
| AT2G29560 | EN03      | 307.9261 | 280.1266 | 275.558  | 288.61798 | 288.8357 | 308.0238 | 279.2413 | 244.908  | 313.375  | 316.6468 | 287.3521 | 273.4793 | 0.018412 | 0.928981  | -0.04431 | 0.834032  | 0.021766  | 0.958253 |
| AT2G29570 | PCNA2     | 80.85369 | 269.4212 | 233.0654 | 249.5114  | 256.3478 | 247.2165 | 173.4142 | 194.2002 | 245.0377 | 266.7509 | 295.3341 | 303.5206 | -0.06304 | 0.768445  | -0.35674 | 0.052007  | 0.132541  | 0.691086 |
| AT2G29580 | AT2G29580 | 84.54347 | 85.64381 | 66.95803 | 79.18379  | 69.55906 | 74.76306 | 76.60119 | 58.57476 | 76.60119 | 84.43914 | 77.15937 | 78.7289  | -0.04879 | 0.6867187 | -0.19489 | 0.478128  | 0.051071  | 0.928827 |
| AT2G29590 | AT2G29590 | 59.4452  | 82.07532 | 36.05432 | 98.97974  | 100.695  | 63.79781 | 76.4801  | 66.89118 | 107.3871 | 69.08657 | 49.22236 | 71.47755 | 0.564621 | 0.078615  | 0.485769 | 0.16108   | 0.115717  | 0.874874 |
| AT2G29600 | AT2G29600 | 0        | 0        | 0        | 0.412416  | 0        | 0        | 0        | 0        | 0        | 0        | 0        | 0        | 0.095918 | NA        | 0        | NA        | 0         | NA       |
| AT2G29605 | AT2G29605 | 0        | 0        | 0        | 0         | 0        | 0        | 0        | 0        | 0        | 0        | 0        | 0        | #N/A     | #N/A      | #N/A     | #N/A      | #N/A      | #N/A     |
| AT2G29610 | AT2G29610 | 0        | 0        | 0        | 0         | 0        | 0        | 0        | 0        | 0        | 0        | 0        | 0        | 0        | 0         | 0        | 0         | 0.172362  | NA       |
| AT2G29620 | AT2G29620 | 11.88904 | 7.136984 | 11.58889 | 9.485558  | 12.58688 | 8.971567 | 18.67537 | 7.55223  | 10.73871 | 12.47396 | 13.30334 | 17.61041 | -0.01731 | 0.978744  | 0.213107 | 0.734392  | 0.394171  | NA       |
| AT2G29628 | AT2G29628 | 0        | 0        | 0        | 0         | 0        | 0        | 0        | 0        | 0        | 0        | 0        | 0        | #N/A     | #N/A      | #N/A     | #N/A      | #N/A      | #N/A     |
| AT2G29630 | THIC      | 2966.315 | 3595.256 | 3159.904 | 2774.732  | 2482.265 | 3008.465 | 4726.648 | 5496.944 | 4686.957 | 3792.085 | 3323.174 | 3863.931 | -0.23101 | 0.103995  | 0.610714 | 2.18E-06  | 0.147416  | 0.451852 |
| AT2G29640 | JOSL      | 55.87849 | 55.31163 | 70.82099 | 73.40997  | 77.50867 | 79.74726 | 68.47637 | 65.81229 | 51.74104 | 44.13864 | 66.5167  | 58.01077 | 0.319615 | 0.230799  | 0.025121 | 0.944733  | -0.12477  | 0.83094  |
| AT2G29650 | ANTR1     | 1754.822 | 1943.044 | 1731.895 | 1067.744  | 1045.373 | 1046.683 | 1073.389 | 1031.419 | 754.6382 | 1639.846 | 1664.248 | 1868.775 | -0.76913 | 3.26E-08  | -0.91112 | 5.02E-11  | -0.06793  | 0.837272 |
| AT2G29654 | AT2G29654 | 0        | 0        | 0        | 0         | 0        | 0        | 0        | 0        | 0        | 0        | 0        | 0        | #N/A     | #N/A      | #N/A     | #N/A      | #N/A      | #N/A     |
| AT2G29660 | AT2G29660 | 48.74506 | 33.90067 | 38.62963 | 30.10634  | 33.78583 | 36.88311 | 24.9005  | 30.20892 | 32.21612 | 28.78607 | 23.94601 | 38.32854 | -0.28041 | 0.418392  | -0.46167 | 0.195138  | -0.38949  | 0.486687 |
| AT2G29670 | AT2G29670 | 2161.427 | 2842.304 | 2452.982 | 1875.254  | 1711.153 | 2063.46  | 2119.21  | 2068.232 | 1346.243 | 2553.324 | 2822.699 | 2570.084 | -0.39112 | 0.038923  | -0.41997 | 0.030287  | -0.090376 | 0.824687 |
| AT2G29679 | AT2G29679 | 1.188904 | 0        | 0        | 0         | 0        | 0        | 0        | 0        | 0        | 0        | 0        | 0        | -0.2184  | NA        | -0.20558 | NA        | -0.19918  | NA       |
| AT2G2     |           |          |          |          |           |          |          |          |          |          |          |          |          |          |           |          |           |           |          |

|           |           |          |          |          |          |          |           |          |          |          |          |          |          |          |          |           |          |           |          |          |
|-----------|-----------|----------|----------|----------|----------|----------|-----------|----------|----------|----------|----------|----------|----------|----------|----------|-----------|----------|-----------|----------|----------|
| ATZG30160 | ATZG30160 | 124.8349 | 87.42806 | 91.42346 | 126.6116 | 143.7554 | 106.662   | 102.2699 | 97.10009 | 116.1733 | 77.72239 | 111.7481 | 106.6984 | 0.297607 | 0.227127 | 0.042292  | 0.897427 | -0.05458  | 0.926164 |          |
| ATZG30170 | ATZG30170 | 355.4823 | 339.0067 | 404.3235 | 253.2232 | 292.8105 | 238.2449  | 387.7363 | 339.8503 | 429.5482 | 467.2939 | 389.7879 | 460.9784 | -0.47902 | 0.002577 | 0.071874  | 0.735034 | 0.25854   | 0.311986 |          |
| ATZG30180 | ATZG30180 | 0        | 0        | 0        | 0        | 0        | 0         | 0        | 0        | 0        | 0        | 0        | 0        | 0        | 0        | 0         | 0        | 0         | 0        |          |
| ATZG30190 | ATZG30190 | 0        | 0        | 0        | 0        | 0        | 0         | 0        | 0        | 0        | 0        | 0        | 0        | #N/A     | #N/A     | #N/A      | #N/A     | #N/A      | #N/A     |          |
| ATZG30200 | ATZG30200 | 532.629  | 520.9998 | 490.5963 | 367.4623 | 382.9061 | 387.7711  | 424.1978 | 46.9504  | 395.3796 | 600.6693 | 625.257  | 619.4721 | -0.43903 | 8.81E-05 | -0.29506  | 0.015357 | 0.254623  | 0.128698 |          |
| ATZG30210 | LAC3      | 5.94452  | 1.784246 | 3.862963 | 4.948987 | 6.624673 | 5.981045  | 5.335821 | 5.39445  | 2.928738 | 3.838143 | 1.330334 | 1.035907 | 0.388483 | 0.577651 | 0.117718  | 0.889016 | -0.52582  | NA       |          |
| ATZG30220 | ATZG30220 | 0        | 0        | 0        | 0        | 0        | 0         | 0        | 0        | 0        | 0        | 0        | 0        | #N/A     | #N/A     | #N/A      | #N/A     | #N/A      | #N/A     |          |
| ATZG30230 | ATZG30230 | 80.84547 | 96.34929 | 54.08148 | 145.5827 | 155.0173 | 106.662   | 124.5025 | 87.39009 | 181.5818 | 45.09817 | 77.15937 | 77.69299 | 0.779723 | 0.012151 | 0.728181  | 0.025087 | -0.19326  | 0.77299  |          |
| ATZG30240 | CHX13     | 0        | 0        | 0        | 0        | 0.662467 | 0         | 0        | 0        | 0.976246 | 0.995936 | 1.330334 | 0        | 0.093315 | NA       | 0.163739  | NA       | 0.371282  | NA       |          |
| ATZG30250 | WRKY25    | 272.259  | 353.2807 | 263.9691 | 1033.926 | 1012.912 | 1144.373  | 1000.466 | 878.2164 | 681.4197 | 173.6759 | 203.5411 | 172.9964 | 1.811897 | 3.77E-28 | 1.500701  | 2.54E-19 | -0.67134  | 0.003832 |          |
| ATZG30260 | UZB*      | 376.8826 | 383.6129 | 363.1185 | 400.8679 | 406.0924 | 357.8658  | 433.0908 | 395.9526 | 491.0517 | 309.93   | 375.1542 | 363.6032 | 0.055933 | 0.76154  | 0.23129   | 0.153595 | -0.10043  | 0.740236 |          |
| ATZG30270 | ATZG30270 | 130.7794 | 121.3287 | 178.984  | 196.3098 | 247.7628 | 180.4282  | 166.2998 | 133.7824 | 252.8477 | 94.03449 | 158.3097 | 128.4524 | 0.506538 | 0.072955 | 0.338069  | 0.282263 | -0.1811   | 0.750218 |          |
| ATZG30280 | RDM4      | 154.5575 | 149.8767 | 115.8889 | 159.1924 | 156.3423 | 176.4408  | 160.9639 | 144.5713 | 199.1542 | 171.7569 | 202.2108 | 166.784  | 0.219048 | 0.309935 | 0.261017  | 0.245888 | 0.352135  | 0.253376 |          |
| ATZG30290 | VS2       | 0        | 0        | 0        | 0        | 1.324935 | 0         | 0.889303 | 0        | 0.976246 | 0.995936 | 0        | 0        | 0.214202 | NA       | 0.301675  | NA       | 0.157735  | NA       |          |
| ATZG30300 | ATZG30300 | 1.188904 | 0        | 0        | 0        | 0.662467 | 0         | 0        | 0        | 0.995936 | 1.330334 | 1.035907 | 0        | -0.15495 | NA       | -0.28239  | NA       | 0.341841  | NA       |          |
| ATZG30310 | ATZG30310 | 0        | 0        | 2.575309 | 0        | 0        | 0         | 0        | 0        | 0        | 0        | 1.330334 | 0        | -0.40396 | NA       | -0.38147  | NA       | -0.17864  | NA       |          |
| ATZG30320 | ATZG30320 | 154.5575 | 155.2294 | 177.6963 | 113.4143 | 129.1811 | 123.6083  | 130.7276 | 104.6523 | 169.8668 | 195.7453 | 184.9164 | 195.7863 | -0.40866 | 0.044091 | -0.25851  | 0.259934 | 0.235966  | 0.498938 |          |
| ATZG30330 | BLOS1     | 43.98945 | 64.23286 | 65.67037 | 61.86234 | 82.80841 | 53.8294   | 65.80846 | 45.31338 | 105.4346 | 66.20796 | 75.82904 | 74.58527 | 0.190484 | 0.609892 | 0.306632  | 0.413099 | 0.301463  | 0.606501 |          |
| ATZG30340 | LB13      | 0        | 0        | 0        | 0        | 0        | 0         | 0        | 0        | 1.07889  | 0        | 1.919071 | 1.330334 | 0        | NA       | 0.171591  | NA       | 0.515566  | NA       |          |
| ATZG30350 | ATZG30350 | 104.6235 | 149.8767 | 131.3407 | 115.8888 | 147.0677 | 116.6304  | 150.2923 | 138.0979 | 127.8882 | 155.4448 | 204.8714 | 131.5601 | -0.01234 | 0.967874 | 0.11768   | 0.685308 | 0.342379  | 0.345735 |          |
| ATZG30360 | CIPK11    | 8.322328 | 1.784246 | 9.01358  | 15.67179 | 20.53649 | 13.95577  | 14.22886 | 18.34113 | 33.19236 | 5.757214 | 9.312338 | 8.287252 | 1.049813 | 0.034659 | 1.378805  | 0.005396 | 0.117944  | NA       |          |
| ATZG30362 | ATZG30362 | 0        | 0        | 0        | 0        | 0.662467 | 0         | 0        | 0        | 1.778607 | 1.07889  | 0        | 0        | 0.081389 | NA       | 0.466291  | NA       | 0.17166   | NA       |          |
| ATZG30370 | EPFL6     | 23.77808 | 10.70548 | 14.1642  | 22.68286 | 29.14856 | 22.92734  | 17.78607 | 15.10446 | 16.59618 | 23.02886 | 14.63367 | 16.5745  | 0.520923 | 0.21519  | -0.01636  | 0.977807 | 0.113455  | 0.908715 |          |
| ATZG30380 | ATZG30380 | 2.377808 | 1.784246 | 2.575309 | 2.886909 | 1.324935 | 1.993682  | 4.446517 | 5.39445  | 1.952492 | 2.878607 | 5.321336 | 8.287252 | -0.1141  | 0.893317 | 0.436868  | 0.569731 | 0.767005  | NA       |          |
| ATZG30390 | FC2       | 856.0108 | 720.8354 | 779.0309 | 621.5103 | 574.3591 | 604.0855  | 973.7873 | 993.6576 | 955.7448 | 817.5244 | 889.9934 | 867.0538 | -0.38834 | 0.000412 | -0.304862 | 0.007721 | 0.122015  | 0.551888 |          |
| ATZG30395 | OPF17     | 5.94452  | 3.568492 | 5.150617 | 4.124156 | 3.312336 | 4.984204  | 2.66791  | 6.47334  | 5.874766 | 6.716749 | 5.321336 | 8.287252 | -0.22135 | 0.75848  | -0.01644  | 0.984222 | 0.343901  | NA       |          |
| ATZG30400 | OPF2      | 9.511232 | 3.568492 | 3.862963 | 6.598649 | 7.949607 | 8.971567  | 14.22886 | 6.47334  | 14.64369 | 10.55489 | 3.991002 | 11.39497 | 0.270265 | 0.67895  | 0.780416  | 0.189857 | 0.433658  | NA       |          |
| ATZG30410 | TFC4      | 236.5919 | 237.3047 | 281.9963 | 346.0167 | 310.0347 | 272.1375  | 203.6505 | 156.439  | 373.9022 | 278.2653 | 259.4151 | 305.5924 | 0.284576 | 0.331702 | -0.04059  | 0.91327  | 0.150372  | 0.787236 |          |
| ATZG30420 | ETC2      | 10.70014 | 8.91213  | 15.45185 | 23.9201  | 23.84882 | 16.94229  | 26.6791  | 26.97225 | 34.16861 | 12.47396 | 14.63367 | 18.64632 | 0.768448 | 0.064598 | 1.147748  | 0.004979 | 0.293742  | 0.734237 |          |
| ATZG30424 | TCL2      | 26.15589 | 26.72623 | 25.75309 | 13.73057 | 125.8688 | 111.96429 | 11.96429 | 73.81219 | 58.26006 | 79.07593 | 34.54328 | 43.90102 | 0.686876 | 0.122323 | 0.53E-17  | 0.136225 | 0.102E-06 | 0.265891 | 0.158004 |
| ATZG30430 | ATZG30430 | 0        | 0        | 0        | 0        | 0        | 0         | 0        | 0        | 0        | 0        | 0        | 0        | #N/A     | #N/A     | #N/A      | #N/A     | #N/A      | #N/A     |          |
| ATZG30432 | TCL1      | 14.26685 | 8.92123  | 7.725926 | 3.299325 | 4.637271 | 2.990522  | 7.114428 | 3.23667  | 6.833722 | 7.676285 | 21.28534 | 16.5745  | -1.14781 | 0.034368 | -0.64978  | 0.289405 | 0.440575  | NA       |          |
| ATZG30440 | TPP1      | 1322.061 | 1479.14  | 1337.873 | 1611.72  | 1770.113 | 1688.648  | 1992.04  | 1885.9   | 2116.501 | 1081.397 | 1233.22  | 1275.201 | 0.291635 | 0.011556 | 0.531797  | 1.34E-06 | -0.20275  | 0.268099 |          |
| ATZG30450 | ATZG30450 | 0        | 0        | 0        | 0        | 0        | 0         | 0        | 0        | 0        | 0        | 0        | 0        | #N/A     | #N/A     | #N/A      | #N/A     | #N/A      | #N/A     |          |
| ATZG30460 | ATZG30460 | 208.0582 | 223.0308 | 220.1889 | 166.6159 | 182.841  | 206.346   | 194.7575 | 145.6501 | 130.817  | 237.0053 | 186.2468 | 212.3608 | -0.22955 | 0.273698 | -0.44983  | 0.027756 | -0.02782  | 0.957294 |          |
| ATZG30470 | VAL1      | 374.5047 | 349.7122 | 285.8593 | 261.4715 | 262.337  | 262.1691  | 200.9826 | 264.328  | 331.9236 | 204.3811 | 264.7365 | 222.7199 | -0.35201 | 0.092459 | -0.33348  | 0.132674 | -0.53508  | 0.050761 |          |
| ATZG30480 | ATZG30480 | 40.42273 | 41.03766 | 37.34198 | 60.21267 | 42.39791 | 44.85784  | 48.02239 | 34.52448 | 30.26363 | 46.05771 | 54.54369 | 34.18492 | 0.313378 | 0.356695 | -0.06205  | 0.889105 | 0.162022  | 0.810702 |          |
| ATZG30490 | CYP7A5    | 110.4942 | 95.9424  | 106.1027 | 1194.768 | 1180.517 | 1215.149  | 1068.943 | 1056.233 | 1046.536 | 1010.391 | 1116.15  | 1032.799 | 0.195228 | 0.065646 | 0.017925  | 0.901941 | 0.010698  | 0.970744 |          |
| ATZG30500 | NET48     | 391.1494 | 437.1403 | 385.0086 | 549.75   | 538.5859 | 659.9086  | 417.0833 | 435.8715 | 466.6456 | 451.9413 | 424.3765 | 433.0089 | 0.520098 | 8.24E-05 | 0.123235  | 0.467025 | 0.133564  | 0.697219 |          |
| ATZG30505 | ATZG30505 | 9.511232 | 16.05821 | 14.1642  | 23.50769 | 24.51129 | 17.94313  | 20.45398 | 25.89336 | 19.52492 | 23.98839 | 19.95501 | 9.323159 | 0.673314 | 0.122643 | 0.647198  | 0.16865  | 0.377311  | 0.644673 |          |
| ATZG30520 | RPT2      | 3828.271 | 3375.793 | 3284.806 | 1952.788 | 2123.208 | 2175.107  | 1568.731 | 1477     | 1217.379 | 2492.874 | 2285.514 | 3066.283 | -0.73954 | 3.12E-07 | -0.17364  | 6.5E-20  | -0.4127   | 0.004017 |          |
| ATZG30530 | ATZG30530 | 183.0912 | 183.7773 | 218.9012 | 270.5446 | 251.0751 | 280.1123  | 273.9055 | 284.8269 | 268.4676 | 199.5834 | 147.6671 | 188.535  | 0.440827 | 0.006677 | 0.486052  | 0.003536 | -0.12019  | 0.727223 |          |
| ATZG30540 | GRX59     | 19.02246 | 8.91213  | 21.89012 | 25.98218 | 28.48609 | 20.93366  | 34.62884 | 21.5778  | 40.02609 | 16.31211 | 13.30334 | 33.16901 | 0.491512 | 0.275341 | 0.80347   | 0.068582 | 0.259206  | 0.769037 |          |
| ATZG30550 | ATZG30550 | 164.0687 | 239.089  | 207.3123 | 480.4641 | 388.2058 | 406.711   | 206.3184 | 270.8014 | 227.4653 | 183.2713 | 145.0064 | 160.5655 | 1.052991 | 3.26E-09 | 0.208927  | 0.36246  | -0.29722  | 0.365146 |          |
| ATZG30560 | ATZG30560 | 0        | 1.784246 | 1.287654 | 0        | 0        | 0         | 0        | 0        | 1.952492 | 0.995936 | 0        | 0        | -0.56473 | NA       | -0.12498  | NA       | 0.054462  | NA       |          |
| ATZG30570 | PSBW      | 31524.98 | 33418.93 | 34010.81 | 18614.79 | 20074.08 | 15461     | 18664.7  | 15637.43 | 32104.83 | 38083.97 | 39150.4  | 40723.57 | -0.84119 | 0.000103 | -0.55658  | 0.016146 | 0.239412  | 0.555713 |          |
| ATZG30575 | GAU75     | 134.3461 | 137.3869 | 127.4778 | 124.5495 | 117.9192 | 120.6177  | 137.842  | 130.5457 | 94.69586 | 141.0517 | 139.6851 | 151.2674 | -0.12982 | 0.565786 | -0.13061  | 0.959539 | 0.114429  | 0.779832 |          |
| ATZG30580 | DRIP2     | 93.92341 | 83.89596 | 110.7383 | 103.1039 | 102.02   | 115.6335  | 90.70896 | 89.54786 | 78.09968 | 77.72239 | 79.82004 | 94.2649  | 0.133114 | 0.584522 | -0.16382  | 0.532539 | -0.19825  | 0.625212 |          |
| ATZG30590 | WRKY21    | 286.5259 | 249.7944 | 296.1605 | 388.9079 | 396.8179 | 452.5657  | 343.2711 | 374.3748 | 365.116  | 236.0458 | 271.3881 | 282.8025 | 0.554189 | 8.41E-05 | 0.366748  | 0.017293 | -0.08267  | 0.799463 |          |
| ATZG30600 | ATZG30600 | 1556.275 | 1787.815 | 1616.006 | 1193.531 | 1083.796 | 1785.342  | 1974.254 | 2099.52  | 980.151  | 1827.915 | 1738.746 | 1754.826 | -0.27342 | 0.33361  | 0.026132  | 0.943233 | 0.097473  | 0.886624 |          |
| ATZG30610 | ATZG30610 | 5.94452  | 5.352738 | 1.287654 | 2.062078 | 3.312336 | 3.987362  | 2.66791  | 4.31556  | 1.952492 | 2.878607 | 2.660668 | 6.125489 | -0.29946 | 0.689319 | -0.3007   | 0.707453 | -0.03536  | NA       |          |
| ATZG30620 | ATZG30620 | 1188.904 | 1206.15  | 1214.258 | 1322.617 | 1198.403 | 1152.348  | 1375.572 | 1182.463 | 1822.651 | 1039.177 | 816.8251 | 1415.048 | 0.025278 | 0.930008 | 0.271873  | 0.252879 | -0.13675  | 0.749335 |          |
| ATZG30630 | ATZG30630 | 1.188904 | 3.568492 |          |          |          |           |          |          |          |          |          |          |          |          |           |          |           |          |          |

|           |           |          |          |          |          |          |          |          |          |          |          |          |          |          |          |          |          |          |          |
|-----------|-----------|----------|----------|----------|----------|----------|----------|----------|----------|----------|----------|----------|----------|----------|----------|----------|----------|----------|----------|
| AT2G31060 | AT2G31060 | 298.4149 | 278.3424 | 269.1198 | 495.7235 | 414.042  | 444.591  | 418.8619 | 452.0549 | 328.0187 | 218.7741 | 236.7994 | 250.6894 | 0.668856 | 2.29E-05 | 0.492396 | 0.003374 | -0.25742 | 0.360375 |
| AT2G31070 | TCP10     | 403.0384 | 417.5136 | 390.1593 | 282.5047 | 210.6646 | 280.1123 | 241.0012 | 261.0914 | 212.8216 | 357.9068 | 424.3765 | 386.3931 | -0.63454 | 0.000057 | -0.74613 | 3.24E-06 | -0.05119 | 0.894225 |
| AT2G31080 | AT2G31080 | 0        | 0        | 0        | 0        | 0        | 0        | 0        | 0        | 0        | 0.959536 | 0        | 1.035907 | 0        | NA       | 0        | NA       | 0.332992 | NA       |
| AT2G31081 | CLE4      | 0        | 0        | 0        | 0        | 0        | 0        | 0.889303 | 0        | 0        | 0        | 0        | 0        | 0        | NA       | 0.160764 | NA       | 0        | NA       |
| AT2G31082 | CLE7      | 0        | 0        | 0        | 0        | 0        | 0        | 0        | 0        | 0        | 0        | 0        | 0        | #N/A     | #N/A     | #N/A     | #N/A     | #N/A     | #N/A     |
| AT2G31083 | CLE5      | 0        | 0        | 0        | 0        | 0        | 0        | 0.889303 | 0        | 0.976246 | 0        | 0        | 0        | 0        | NA       | 0.309898 | NA       | 0        | NA       |
| AT2G31085 | CLE6      | 0        | 0        | 0        | 0        | 0.412416 | 0        | 0        | 0        | 0        | 0        | 0        | 0        | 0.095918 | NA       | 0        | NA       | 0        | NA       |
| AT2G31090 | AT2G31090 | 36.85602 | 48.17464 | 30.9037  | 48.25262 | 76.18374 | 36.88311 | 48.91169 | 28.05114 | 86.88589 | 35.50282 | 30.59768 | 51.79533 | 0.442824 | 0.304125 | 0.458902 | 0.312779 | 0.036194 | 0.974568 |
| AT2G31100 | AT2G31100 | 1.188904 | 0        | 1.287654 | 4.536571 | 5.962205 | 3.987363 | 4.446517 | 5.39445  | 2.928738 | 0        | 6.65167  | 0        | 1.092975 | 0.095022 | 0.942591 | 0.177659 | 0.345024 | NA       |
| AT2G31110 | TBL40     | 89.1678  | 101.702  | 81.12222 | 183.9373 | 178.2037 | 157.5008 | 88.93035 | 89.54786 | 98.60085 | 78.68192 | 77.15937 | 78.7289  | 0.933583 | 2.81E-07 | 0.035685 | 0.901599 | -0.19612 | 0.620586 |
| AT2G31130 | AT2G31130 | 105.8125 | 110.6233 | 97.86173 | 125.3743 | 130.5061 | 153.5135 | 143.1779 | 120.8357 | 137.6507 | 106.5085 | 141.0154 | 116.0215 | 0.364179 | 0.075865 | 0.350873 | 0.110425 | 0.198173 | 0.600891 |
| AT2G31140 | AT2G31140 | 204.4915 | 289.0479 | 296.1605 | 275.0812 | 366.3444 | 307.027  | 301.4739 | 261.0914 | 241.1328 | 353.1091 | 365.8418 | 293.1615 | 0.261134 | 0.217754 | 0.030751 | 0.9121   | 0.352942 | 0.24807  |
| AT2G31141 | AT2G31141 | 1.188904 | 0        | 1.287654 | 0        | 0.662467 | 1.993682 | 0.889303 | 2.15778  | 1.952492 | 0        | 0        | 2.071813 | -0.08079 | 0.918648 | 0.317072 | 0.668528 | -0.08418 | NA       |
| AT2G31150 | AT2G31150 | 493.3951 | 504.9416 | 524.0753 | 401.2804 | 426.6289 | 417.6763 | 557.5933 | 491.9738 | 412.9521 | 636.1721 | 641.221  | 644.3339 | -0.28738 | 0.041808 | -0.05609 | 0.762414 | 0.33215  | 0.083558 |
| AT2G31160 | LSH3      | 41.61164 | 42.8219  | 27.00474 | 32.58083 | 27.82363 | 17.94313 | 25.7898  | 30.20892 | 31.23987 | 40.3005  | 33.25835 | 40.40035 | -0.4215  | 0.230629 | -0.32098 | 0.417922 | 0.047709 | 0.956991 |
| AT2G31170 | SYCO ARTH | 300.7927 | 301.5376 | 318.0506 | 254.048  | 222.589  | 227.2797 | 305.0311 | 252.4602 | 231.3703 | 305.1323 | 297.9948 | 358.4237 | -0.37652 | 0.020987 | -0.21703 | 0.241247 | 0.063318 | 0.865138 |
| AT2G31180 | ATMYB14   | 0        | 0        | 0        | 1.237247 | 1.987402 | 0        | 4.446517 | 2.15778  | 3.904984 | 1.919071 | 0        | 0        | 0.510513 | 0.453677 | 1.308786 | 0.03521  | 0.303088 | NA       |
| AT2G31190 | RUS2      | 127.2127 | 135.6027 | 126.1901 | 122.075  | 110.632  | 129.5893 | 148.5137 | 110.0468 | 113.2445 | 152.5662 | 159.6401 | 180.2477 | -0.10104 | 0.668639 | -0.05528 | 0.83907  | 0.336162 | 0.271055 |
| AT2G31200 | ADF6      | 305.5483 | 306.8903 | 390.1593 | 704.8182 | 906.9177 | 641.9655 | 595.8333 | 430.4771 | 770.2581 | 480.7273 | 516.1696 | 408.1472 | 1.129196 | 1.07E-07 | 0.812167 | 0.000254 | 0.46732  | 0.165154 |
| AT2G31210 | BHLH91    | 2.377808 | 1.784246 | 1.287654 | 2.474493 | 3.312336 | 0.996841 | 4.446517 | 1.07889  | 1.952492 | 4.797678 | 2.660668 | 4.143626 | 0.149518 | 0.855138 | 0.220964 | 0.799599 | 0.598304 | NA       |
| AT2G31215 | AT2G31215 | 0        | 0        | 0        | 0        | 0        | 0        | 0.889303 | 0        | 0        | 0        | 0        | 0        | 0        | NA       | 0.160764 | NA       | 0        | NA       |
| AT2G31218 | AT2G31218 | 0        | 0        | 0        | 0        | 0        | 0        | 0        | 0        | 0        | 0        | 0        | 0        | #N/A     | #N/A     | #N/A     | #N/A     | #N/A     | #N/A     |
| AT2G31220 | BHLH10    | 17.83356 | 16.05821 | 19.31482 | 3.299325 | 4.637271 | 3.987363 | 5.335821 | 3.23667  | 1.952492 | 15.35257 | 10.64267 | 13.46678 | -1.79399 | 0.000135 | -1.82748 | 0.000273 | -0.36133 | NA       |
| AT2G31230 | ERF15     | 68.67903 | 82.07532 | 81.12222 | 98.56732 | 131.1685 | 109.6525 | 109.3843 | 96.0212  | 249.919  | 75.80331 | 70.5077  | 98.41112 | 0.342349 | 0.342504 | 0.740774 | 0.02792  | -0.09161 | 0.907588 |
| AT2G31240 | AT2G31240 | 135.535  | 133.8185 | 133.9161 | 153.0062 | 160.9795 | 154.5103 | 154.7388 | 154.2813 | 136.6744 | 109.3871 | 106.4267 | 124.3088 | 0.21166  | 0.259219 | 0.141071 | 0.512829 | -0.23803 | 0.448796 |
| AT2G31250 | HEMA3     | 5.94452  | 1.784246 | 1.287654 | 0.824831 | 0.662467 | 1.993682 | 5.335821 | 1.07889  | 0        | 1.919071 | 1.330334 | 0        | -0.65458 | 0.349088 | -0.22634 | 0.788761 | -0.61872 | NA       |
| AT2G31260 | APG9      | 265.1256 | 230.1677 | 198.2988 | 175.689  | 182.841  | 207.3429 | 241.0012 | 250.3025 | 196.2254 | 199.5834 | 183.5861 | 225.8276 | -0.29644 | 0.117949 | -0.0145  | 0.955411 | -0.18228 | 0.590246 |
| AT2G31270 | CDT1A     | 149.8019 | 110.6233 | 86.27284 | 83.72036 | 97.38269 | 114.6367 | 88.93035 | 89.54786 | 57.59851 | 120.9015 | 111.7481 | 130.5242 | -0.23682 | 0.407174 | -0.53528 | 0.050938 | 0.061987 | 0.920768 |
| AT2G31271 | AT2G31271 | 0        | 0        | 0        | 0        | 0        | 0        | 0        | 0        | 0        | 0        | 0        | 0        | #N/A     | #N/A     | #N/A     | #N/A     | #N/A     | #N/A     |
| AT2G31280 | BHLH155   | 307.9261 | 285.4794 | 303.8864 | 183.1125 | 154.3549 | 193.3871 | 240.1119 | 235.198  | 142.5319 | 263.8723 | 312.6285 | 287.982  | -0.74077 | 0.00017  | -0.52522 | 0.012675 | -0.05573 | 0.909596 |
| AT2G31290 | AT2G31290 | 80.84547 | 87.42806 | 91.42346 | 61.86234 | 57.63465 | 58.81361 | 67.5706  | 67.97007 | 62.47974 | 83.4796  | 77.15937 | 74.58527 | -0.51937 | 0.01635  | -0.37651 | 0.120162 | -0.13358 | 0.77005  |
| AT2G31300 | ARPC1B    | 63.01191 | 110.6233 | 115.8889 | 138.5716 | 127.8562 | 134.5735 | 120.5056 | 112.2046 | 82.98091 | 105.5489 | 141.0154 | 96.33931 | 0.463199 | 0.070729 | 0.12899  | 0.699889 | 0.236928 | 0.623916 |
| AT2G31305 | INH3      | 85.60108 | 80.29107 | 74.68395 | 176.1015 | 213.3145 | 129.5893 | 141.3993 | 116.5201 | 206.9642 | 110.3466 | 102.4357 | 107.7343 | 1.065082 | 1.74E-05 | 0.90601  | 0.000453 | 0.391796 | 0.372446 |
| AT2G31310 | LBD14     | 0        | 0        | 0        | 0        | 0        | 0        | 0        | 0        | 0        | 0        | 0        | 0        | #N/A     | #N/A     | #N/A     | #N/A     | #N/A     | #N/A     |
| AT2G31320 | PARP1     | 127.2127 | 114.1917 | 118.4642 | 97.74249 | 82.14594 | 111.6462 | 98.71269 | 88.46897 | 66.38473 | 129.5373 | 155.6491 | 125.3447 | -0.3067  | 0.18408  | -0.49057 | 0.036287 | 0.175714 | 0.678888 |
| AT2G31335 | AT2G31335 | 0        | 0        | 0        | 0.824831 | 0        | 0        | 0        | 0        | 0        | 0        | 0        | 0        | 0.173038 | NA       | 0        | NA       | 0        | NA       |
| AT2G31340 | emb1381   | 82.03437 | 82.07532 | 103.0123 | 68.04857 | 78.17114 | 75.7599  | 70.25498 | 78.75897 | 63.45599 | 84.43914 | 87.80204 | 84.94434 | -0.27152 | 0.246504 | -0.32681 | 0.190159 | -0.05866 | 0.913186 |
| AT2G31345 | AT2G31345 | 0        | 0        | 0        | 0.824831 | 0        | 1.993682 | 1.778607 | 1.07889  | 0        | 0        | 0        | 0        | 0.45493  | NA       | 0.456618 | NA       | 0        | NA       |
| AT2G31350 | GLX2-5    | 325.7597 | 351.4965 | 396.5975 | 485.4131 | 459.0898 | 394.7489 | 465.1057 | 428.3193 | 398.3084 | 417.398  | 494.8842 | 360.4955 | 0.317284 | 0.064697 | 0.262168 | 0.157844 | 0.237158 | 0.398983 |
| AT2G31360 | AD52      | 1471.863 | 1725.366 | 1585.102 | 1711.937 | 1595.884 | 1600.926 | 1666.555 | 1633.439 | 1710.313 | 1696.459 | 1523.232 | 1744.467 | 0.040285 | 0.071524 | 0.068861 | 0.618881 | 0.05658  | 0.810294 |
| AT2G31370 | POSF17    | 561.1627 | 579.88   | 521.5    | 497.1605 | 400.7927 | 459.5436 | 322.4005 | 322.5881 | 236.2515 | 659.201  | 698.4253 | 571.8204 | -0.3505  | 0.549431 | -0.80818 | 3.53E-06 | 0.210807 | 0.498975 |
| AT2G31380 | BBX25     | 569.485  | 681.582  | 605.1975 | 328.2828 | 318.6468 | 304.0364 | 174.3035 | 152.1235 | 114.2208 | 602.5884 | 494.8842 | 578.0358 | -0.94349 | 5.46E-10 | -0.20822 | 2.48E-38 | -0.13997 | 0.650475 |
| AT2G31390 | AT2G31390 | 323.3819 | 306.8903 | 300.0235 | 412.828  | 459.7523 | 406.711  | 306.8907 | 284.8269 | 343.6386 | 284.0225 | 333.9138 | 299.377  | 0.453857 | 0.001156 | 0.00727  | 0.972253 | -0.0253  | 0.948561 |
| AT2G31400 | GUN1      | 2515.721 | 2453.338 | 2333.23  | 2074.863 | 1821.123 | 2406.374 | 231.857  | 2696.146 | 1869.511 | 2119.614 | 1863.798 | 201.7173 | -0.20973 | 0.230243 | -0.08463 | 0.682696 | -0.27944 | 0.267717 |
| AT2G31410 | AT2G31410 | 315.0595 | 305.1061 | 337.3654 | 525.8299 | 549.8478 | 433.6257 | 345.0498 | 309.6414 | 664.8235 | 282.1035 | 279.3701 | 373.9623 | 0.628453 | 0.015964 | 0.441533 | 0.120312 | -0.03229 | 0.963091 |
| AT2G31420 | AT2G31420 | 0        | 1.287654 | 0        | 2.062708 | 0.662467 | 3.987363 | 2.66791  | 0        | 0.972646 | 0        | 0        | 0        | 0.723168 | 0.249362 | 0.350302 | 0.621911 | -0.2739  | NA       |
| AT2G31425 | AT2G31425 | 0        | 0        | 0        | 2.474493 | 0.662467 | 1.993682 | 3.552124 | 2.15778  | 0        | 0        | 0        | 1.035907 | 0.774506 | 0.208302 | 0.810714 | 0.197876 | 0.140491 | NA       |
| AT2G31430 | AT2G31430 | 0        | 0        | 0        | 0        | 0.662467 | 0        | 0        | 0        | 0.976246 | 0        | 0        | 0        | 0.097788 | NA       | 0.140077 | NA       | 0        | NA       |
| AT2G31432 | AT2G31432 | 0        | 0        | 0        | 0        | 0        | 0        | 0        | 0        | 0        | 0        | 0        | 0        | #N/A     | #N/A     | #N/A     | #N/A     | #N/A     | #N/A     |
| AT2G31440 | AT2G31440 | 228.2696 | 305.1061 | 266.5444 | 238.3762 | 217.9517 | 203.3555 | 202.7612 | 209.3046 | 209.8929 | 200.5429 | 191.5681 | 216.5045 | -0.25641 | 0.126624 | -0.34771 | 0.003326 | -0.37576 | 0.107851 |
| AT2G31450 | NTH1      | 80.84547 | 99.91778 | 119.7519 | 122.8998 | 131.831  | 123.6083 | 128.949  | 106.8101 | 81.02842 | 113.2252 | 109.0874 | 103.5907 | 0.324557 | 0.171892 | 0.078619 | 0.800769 | 0.115743 | 0.816445 |
| AT2G31460 | AT2G31460 | 0        | 0        | 0        | 0        | 0        | 0        | 0.889303 | 0        | 0        | 0        | 0        | 0        | 0        | NA       | 0.160764 | NA       | 0        | NA       |
| AT2G31470 | DOR       | 2.377808 | 0        | 0        | 0        | 0        | 0        | 0.889303 | 0        | 0        | 0        | 0        | 0        | -0.37882 | NA       | -0.20351 | NA       | -0.35324 | NA       |
| AT2G31480 | AT2G31480 | 0        | 0        | 0        | 0        | 0        | 0        | 0        | 0        | 0        | 0        | 0        | 0        | #N/A     | #N/A     | #N/A     | #N/A     | #N/A     | #N/A     |
| AT2G31490 | AT2G31490 | 357.8601 | 322.9485 | 414.6247 | 625.222  | 637.2935 | 506.3951 | 380.6219 | 353.8759 | 777.0918 | 490.3227 | 537.4549 | 585.2872 | 0.659564 | 0.011968 | 0.441591 | 0.12428  | 0.530818 | 0.174006 |
| AT2G31500 | CPK24     | 0        | 0        | 0        | 0.412416 | 1.       |          |          |          |          |          |          |          |          |          |          |          |          |          |

|           |           |          |          |          |          |          |          |          |          |          |          |          |          |          |          |          |          |          |          |
|-----------|-----------|----------|----------|----------|----------|----------|----------|----------|----------|----------|----------|----------|----------|----------|----------|----------|----------|----------|----------|
| AT2G31945 | AT2G31945 | 2.377808 | 0        | 0        | 28.45667 | 35.77323 | 29.90522 | 73.81219 | 38.84004 | 65.40848 | 0        | 0        | 4.143626 | 3.177781 | 6.52E-11 | 4.038984 | 3.02E-17 | 0.040763 | 0.981748 |
| AT2G31953 | LCR76     | 0        | 0        | 0        | 0.412416 | 0        | 0        | 0        | 0        | 0        | 0        | 0        | 0        | 0.095918 | NA       | 0        | NA       | 0        | NA       |
| AT2G31955 | CNX2      | 218.7583 | 226.5992 | 216.3259 | 306.4248 | 321.9591 | 314.0048 | 333.4888 | 303.1681 | 309.47   | 212.0574 | 192.8984 | 200.9659 | 0.505139 | 0.000166 | 0.513013 | 0.000214 | -0.12013 | 0.676709 |
| AT2G31957 | LCR75     | 0        | 0        | 0        | 0        | 0        | 0        | 0.889303 | 0        | 0        | 0.959536 | 0        | 0        | 0        | NA       | 0.13694  | 0        | 0.147196 | NA       |
| AT2G31960 | CALS2     | 1124.703 | 906.397  | 874.3173 | 462.7303 | 391.5182 | 522.3446 | 578.0473 | 703.4362 | 399.2846 | 741.721  | 646.5423 | 685.7701 | -1.05054 | 7.01E-08 | -0.76951 | 0.000143 | -0.47323 | 1.06412  |
| AT2G31970 | RAD50     | 325.7597 | 308.6746 | 298.7358 | 264.3584 | 274.9239 | 257.1849 | 343.2711 | 294.537  | 216.7266 | 302.2537 | 232.8084 | 285.9102 | -0.22342 | 0.274917 | -0.76951 | 0.600454 | -0.17691 | 0.163447 |
| AT2G31980 | CYS2      | 4.755616 | 7.136984 | 5.150617 | 5.773818 | 3.312336 | 1.993682 | 2.66791  | 4.31556  | 3.904984 | 6.716749 | 10.64267 | 6.215439 | -0.35197 | 0.607207 | -0.42921 | 0.551866 | 0.364371 | NA       |
| AT2G31981 | AT2G31981 | 0        | 0        | 0        | 0        | 0        | 0        | 0        | 0        | 0.96246  | 0        | 0        | 0        | 0        | NA       | 0.16673  | NA       | 0        | NA       |
| AT2G31985 | AT2G31985 | 0        | 0        | 0        | 0        | 0        | 0        | 0.996841 | 0        | 0        | 0        | 0        | 0        | 0        | NA       | 0        | NA       | 0        | 0.152581 |
| AT2G31990 | AT2G31990 | 29.7226  | 23.1952  | 28.3284  | 45.36571 | 51.67245 | 44.85784 | 57.80473 | 51.78672 | 68.33722 | 16.31211 | 27.93701 | 26.93357 | 0.737972 | 0.016414 | 1.049285 | 0.000557 | -0.21193 | 0.761421 |
| AT2G32000 | AT2G32000 | 198.547  | 162.3664 | 173.8333 | 151.3565 | 141.1055 | 149.5261 | 154.7388 | 165.0702 | 123.007  | 152.5662 | 139.6851 | 133.6319 | -0.2754  | 0.145803 | -0.2745  | 0.178052 | -0.32643 | 0.256531 |
| AT2G32010 | CVL1      | 347.16   | 405.0238 | 319.3383 | 211.1568 | 200.0651 | 227.2797 | 265.0124 | 261.0914 | 125.9357 | 342.5542 | 399.1002 | 376.0341 | -0.71815 | 0.002239 | -0.68704 | 0.004637 | 0.060604 | 0.917438 |
| AT2G32020 | AT2G32020 | 3.566712 | 0        | 0        | 4.948987 | 8.612075 | 2.990522 | 10.67164 | 8.63112  | 9.76246  | 2.878607 | 1.330334 | 0        | 1.091363 | 0.086507 | 1.681895 | 0.006522 | -0.01919 | NA       |
| AT2G32030 | AT2G32030 | 2.377808 | 3.568492 | 5.150617 | 32.99325 | 30.47349 | 49.84204 | 35.57214 | 28.05114 | 48.8123  | 1.919071 | 3.991002 | 2.071813 | 2.663169 | 2.96E-09 | 2.664068 | 4.4E-09  | -0.33657 | 0.771203 |
| AT2G32040 | AT2G32040 | 330.5153 | 433.5718 | 387.584  | 387.6706 | 384.231  | 359.8595 | 381.5112 | 350.6392 | 350.6392 | 384.8779 | 384.4665 | 316.9874 | -0.01617 | 0.94054  | -0.14079 | 0.462474 | -0.14671 | 0.622829 |
| AT2G32050 | AT2G32050 | 0        | 0        | 0        | 1.237247 | 1.324935 | 1.993682 | 1.778607 | 1.07889  | 0        | 0.995936 | 1.330334 | 2.071813 | 0.735946 | 0.24861  | 0.470063 | 0.497844 | 0.690345 | NA       |
| AT2G32060 | RP512C    | 916.6449 | 942.0819 | 902.6457 | 1224.049 | 1422.317 | 906.1283 | 835.056  | 672.1484 | 1256.429 | 1001.755 | 846.0924 | 1077.343 | 0.352405 | 0.148527 | 0.001587 | 0.996207 | 0.081053 | 0.879283 |
| AT2G32070 | CAF1-7    | 334.082  | 403.2396 | 413.337  | 399.2183 | 464.3896 | 470.5088 | 452.6555 | 403.5048 | 415.8808 | 390.531  | 456.3046 | 399.8599 | 0.209621 | 0.188154 | 0.146986 | 0.410841 | 0.114365 | 0.699592 |
| AT2G32080 | PUR1A     | 1167.504 | 1375.654 | 1310.832 | 1271.477 | 1422.317 | 1331.779 | 1216.567 | 1110.178 | 1106.087 | 1321.281 | 1153.4   | 1224.442 | 0.063814 | 0.657133 | -0.16301 | 0.224475 | -0.05545 | 0.836113 |
| AT2G32090 | AT2G32090 | 275.8257 | 335.4383 | 319.3383 | 326.6331 | 384.8935 | 252.2007 | 354.8321 | 221.1724 | 393.4271 | 378.057  | 351.2082 | 398.824  | 0.054769 | 0.851935 | 0.061307 | 0.844736 | 0.271755 | 0.492524 |
| AT2G32100 | OPF16     | 271.0701 | 260.4999 | 195.7235 | 152.5938 | 158.9921 | 108.6556 | 107.6057 | 111.1257 | 126.912  | 229.329  | 313.9588 | 194.7504 | -0.75292 | 0.000747 | -1.03328 | 4.22E-06 | 0.017164 | 0.979097 |
| AT2G32110 | AT2G32110 | 0        | 0        | 0        | 0        | 0        | 0        | 0        | 0        | 0        | 0        | 0        | 0        | #N/A     | #N/A     | #N/A     | #N/A     | #N/A     | #N/A     |
| AT2G32120 | HSP70-8   | 26.15589 | 23.1952  | 23.17778 | 12.78488 | 17.22415 | 14.95261 | 15.11816 | 20.49891 | 15.61994 | 36.46235 | 34.58868 | 24.86176 | -0.64787 | 0.090697 | -0.46423 | 0.283046 | 0.36911  | 0.573276 |
| AT2G32130 | AT2G32130 | 1.188904 | 5.352738 | 1.287654 | 9.897974 | 15.89921 | 16.94629 | 24.01119 | 11.86779 | 31.23987 | 1.919071 | 0        | 2.071813 | 1.746355 | 0.00134  | 2.332979 | 1.12E-05 | -0.36057 | NA       |
| AT2G32140 | AT2G32140 | 27.34479 | 26.76369 | 30.9037  | 148.4696 | 139.1181 | 186.4092 | 249.8943 | 245.9869 | 245.0377 | 23.98839 | 26.60668 | 29.00538 | 2.347222 | 5.62E-24 | 2.990086 | 1.01E-38 | -0.10695 | 0.878314 |
| AT2G32150 | AT2G32150 | 266.3145 | 351.4965 | 288.4346 | 274.6688 | 281.5486 | 325.9669 | 469.5522 | 411.0571 | 490.0755 | 357.9068 | 290.0128 | 350.1364 | -0.03599 | 0.869125 | 0.596511 | 0.000225 | 0.148787 | 0.637513 |
| AT2G32160 | AT2G32160 | 833.4217 | 1022.373 | 999.2198 | 951.4427 | 916.1922 | 859.2768 | 559.3719 | 500.6049 | 451.0256 | 711.0159 | 601.311  | 752.0681 | -0.06176 | 0.734859 | -0.90231 | 6.53E-11 | -0.45719 | 0.013452 |
| AT2G32170 | AT2G32170 | 386.3938 | 413.9451 | 442.9531 | 398.3934 | 433.2536 | 438.6099 | 472.2201 | 471.4749 | 354.3773 | 432.7506 | 456.3046 | 469.2657 | 0.028466 | 0.887792 | 0.061706 | 0.761899 | 0.125831 | 0.669318 |
| AT2G32179 | AT2G32179 | 11.88904 | 8.92123  | 9.01358  | 8.248311 | 11.92441 | 13.95577 | 9.782338 | 19.42002 | 7.809968 | 19.19071 | 7.98204  | 9.323159 | 0.109573 | 0.864776 | 0.225493 | 0.731039 | 0.245226 | NA       |
| AT2G32180 | PTAC18    | 10.70014 | 10.70548 | 10.30123 | 9.485558 | 14.57428 | 9.968408 | 13.39955 | 11.86779 | 18.54867 | 10.55489 | 15.96401 | 14.50269 | 0.071432 | 0.966999 | 0.39505  | 0.47577  | 0.296627 | NA       |
| AT2G32190 | AT2G32190 | 0        | 0        | 2.575309 | 16.90904 | 11.26194 | 16.94629 | 22.23259 | 8.63112  | 25.3824  | 2.878607 | 1.330334 | 1.035907 | 2.299983 | 0.29E-05 | 2.567009 | 3.13E-06 | 0.205577 | NA       |
| AT2G32200 | AT2G32200 | 2.377808 | 0        | 1.287654 | 5.773818 | 7.28714  | 4.984204 | 12.45025 | 5.39445  | 6.833722 | 0.995936 | 1.330334 | 0        | 1.22306  | 0.05041  | 1.556837 | 0.012819 | -0.31186 | NA       |
| AT2G32210 | AT2G32210 | 1.188904 | 1.784246 | 1.287654 | 47.01538 | 49.02258 | 52.83256 | 35.57214 | 31.28781 | 69.31347 | 0.995936 | 1.330334 | 0        | 3.630292 | 1.8E-14  | 3.502116 | 2.44E-13 | -0.349   | 0.7809   |
| AT2G32220 | RPL27A    | 22.58917 | 21.41095 | 30.9037  | 35.88015 | 26.49869 | 31.8989  | 32.01493 | 23.73558 | 34.18681 | 26.867   | 23.94601 | 22.78994 | 0.306725 | 0.421252 | 0.23751  | 0.580562 | -0.03149 | 0.975618 |
| AT2G32230 | PRORP1    | 946.3675 | 947.4346 | 1004.37  | 733.6873 | 699.5654 | 761.5864 | 914.204  | 930.0031 | 920.6    | 1127.454 | 1410.154 | 1090.81  | -0.39816 | 0.001632 | -0.06771 | 0.68353  | 0.318226 | 0.07143  |
| AT2G32235 | AT2G32235 | 5.94452  | 12.48972 | 16.73951 | 10.31039 | 7.949607 | 7.97426  | 8.893035 | 5.39445  | 10.73871 | 15.35257 | 6.65167  | 14.50269 | -0.31366 | 0.589552 | -0.3724  | 0.547693 | 0.087063 | NA       |
| AT2G32240 | AT2G32240 | 889.3002 | 665.5238 | 651.5531 | 354.6774 | 337.1958 | 553.2466 | 738.1219 | 945.1076 | 586.7238 | 604.5050 | 635.8996 | 676.447  | -0.80334 | 0.000331 | -0.07386 | 0.906609 | -0.19733 | 0.652681 |
| AT2G32250 | FRS2      | 160.502  | 196.2671 | 194.4358 | 194.6602 | 183.5034 | 232.6239 | 252.5622 | 281.5903 | 183.5342 | 180.3927 | 227.4871 | 177.14   | 0.141413 | 0.56406  | 0.373424 | 0.097825 | 0.082345 | 0.86482  |
| AT2G32260 | CCT1      | 394.7161 | 403.2396 | 445.5284 | 496.6139 | 522.6867 | 489.4488 | 451.7662 | 481.1849 | 626.7499 | 442.3459 | 428.3675 | 387.429  | 0.273884 | 0.094331 | 0.320822 | 0.055592 | 0.015759 | 0.971556 |
| AT2G32270 | ZIP3      | 8.322328 | 7.136984 | 3.862963 | 1.649662 | 1.324935 | 2.990522 | 1.778607 | 1.07889  | 0        | 5.757214 | 1.330334 | 3.10772  | -1.11205 | 0.083008 | -1.4623  | 0.024259 | -0.57537 | NA       |
| AT2G32273 | MIR417    | 0        | 0        | 0        | 0        | 0        | 0        | 0        | 0        | 0        | 0        | 0        | 0        | #N/A     | #N/A     | #N/A     | #N/A     | #N/A     | #N/A     |
| AT2G32275 | AT2G32275 | 27.34479 | 26.76369 | 36.05432 | 64.74925 | 56.97219 | 54.82624 | 58.69403 | 52.86561 | 96.64835 | 33.58373 | 31.92802 | 35.22082 | 0.128567 | NA       | 0        | NA       | 0        | NA       |
| AT2G32280 | AT2G32280 | 1.188904 | 5.352738 | 1.287654 | 9.897974 | 15.89921 | 16.94629 | 24.01119 | 11.86779 | 31.23987 | 1.919071 | 0        | 2.071813 | 0.903612 | 0.003285 | 1.121439 | 0.000271 | 0.13679  | 0.856582 |
| AT2G32290 | BAM6      | 51.12287 | 89.2123  | 70.82099 | 52.37678 | 45.04777 | 49.84204 | 29.61647 | 346.3237 | 251.8737 | 140.0922 | 111.7481 | 155.386  | -0.4763  | 0.066899 | 2.040568 | 1.88E-21 | 0.93899  | 0.000851 |
| AT2G32291 | AT2G32291 | 0        | 0        | 0        | 0        | 0        | 0        | 0        | 0        | 0        | 0        | 0        | 0        | #N/A     | #N/A     | #N/A     | #N/A     | #N/A     | #N/A     |
| AT2G32295 | AT2G32295 | 111.757  | 108.839  | 118.4642 | 123.3123 | 100.695  | 97.6904  | 131.6169 | 119.7568 | 79.07593 | 118.9824 | 145.0064 | 94.26749 | -0.06568 | 0.833675 | -0.03639 | 0.915695 | 0.067831 | 0.908271 |
| AT2G32300 | UC1       | 2.377808 | 1.784246 | 1.287654 | 0.412416 | 1.324935 | 0        | 0        | 2.15778  | 0.976246 | 0        | 1.330334 | 0        | -0.53646 | 0.424455 | -0.30493 | 0.682843 | -0.62011 | NA       |
| AT2G32310 | AT2G32310 | 0        | 0        | 0        | 0        | 0        | 0        | 0        | 0        | 0        | 0.995936 | 1.330334 | 0        | 0        | NA       | 0        | NA       | 0.366448 | NA       |
| AT2G32315 | AT2G32315 | 0        | 0        | 0        | 0        | 0        | 0        | 0        | 0        | 0        | 0        | 0        | 0        | #N/A     | #N/A     | #N/A     | #N/A     | #N/A     | #N/A     |
| AT2G32320 | THG2      | 198.547  | 253.3629 | 243.3667 | 207.445  | 247.1003 | 233.2607 | 344.1604 | 251.3814 | 185.4867 | 210.1383 | 208.8624 | 275.5511 | -0.01364 | 0.965652 | 0.16756  | 0.557043 | 0.000449 | 0.99607  |
| AT2G32340 | AT2G32340 | 38.04493 | 46.3904  | 33.47901 | 26.80701 | 38.4231  | 42.86415 | 24.9005  | 29.13003 | 27.33489 | 40.3005  | 53.21336 | 43.50807 | -0.1352  | 0.72344  | -0.48624 | 0.176874 | 0.029879 | 0.739655 |
| AT2G32350 | AT2G32350 | 1.188904 | 5.352738 | 1.287654 | 0        | 0.662467 | 0        | 0        | 0        | 0        | 1.919071 | 0        | 2.071813 | -1.00561 | 0.096528 | -1.08229 | 0.070823 | -0.3313  | NA       |
| AT2G32360 | AT2G32360 | 1.188904 | 0        | 0        | 0        | 0        | 0        | 0        | 0        | 0.889303 | 1.07889  | 0        | 0        | -0.26887 | NA       | 0.130815 | NA       | -0.23129 | NA       |



|           |           |          |          |          |           |          |          |          |          |          |          |          |             |          |          |           |          |           |          |
|-----------|-----------|----------|----------|----------|-----------|----------|----------|----------|----------|----------|----------|----------|-------------|----------|----------|-----------|----------|-----------|----------|
| AT2G32830 | PHT1-5    | 3.566712 | 5.352738 | 9.01358  | 4.536571  | 4.637271 | 7.974726 | 4.446517 | 4.31556  | 4.88123  | 4.797678 | 3.991002 | 4.143626    | -0.07688 | 0.919406 | -0.2773   | 0.712294 | -0.32262  | NA       |
| AT2G32835 | RALFL16   | 0        | 0        | 0        | 0         | 0        | 0        | 0.889303 | 0        | 0        | 0        | 0        | 0           | 0        | 0        | 0         | 0        | 0         | 0        |
| AT2G32840 | AT2G32840 | 48.74506 | 58.88012 | 57.94445 | 69.28582  | 56.97219 | 43.86099 | 47.13308 | 33.44559 | 57.59851 | 46.05771 | 55.87403 | 49.72351    | 0.069813 | 0.847794 | -0.23425  | 0.509542 | -0.11926  | 0.858062 |
| AT2G32850 | AT2G32850 | 461.2947 | 442.493  | 453.2543 | 414.4777  | 435.241  | 487.4551 | 499.7886 | 496.2894 | 318.2562 | 460.5771 | 478.9202 | 454.763     | -0.02444 | 0.919717 | -0.04593  | 0.854259 | 0.037039  | 0.935116 |
| AT2G32860 | BGLU33    | 452.9724 | 390.7499 | 521.5    | 126.1992  | 112.6194 | 146.5356 | 166.2998 | 155.3602 | 137.6507 | 450.9817 | 377.8148 | 406.0754    | -1.80315 | 1.81E-30 | -1.54402  | 6.75E-22 | -0.14388  | 0.656137 |
| AT2G32870 | AT2G32870 | 1262.616 | 1377.438 | 1587.678 | 364.5754  | 361.0447 | 374.8121 | 314.8134 | 258.9336 | 290.9213 | 1409.558 | 1359.601 | 1415.048    | -1.92213 | 1.47E-61 | -2.26033  | 2.65E-78 | -0.04428  | 0.966706 |
| AT2G32880 | AT2G32880 | 4003.084 | 479.9622 | 526.6506 | 202.0469  | 313.347  | 337.929  | 281.0199 | 227.6458 | 214.7741 | 554.6116 | 508.1876 | 560.4254    | -0.5284  | 0.000485 | -0.94197  | 3.34E-10 | 0.203908  | 0.441758 |
| AT2G32885 | AT2G32885 | 1.188904 | 3.568492 | 1.287654 | 3.264678  | 3.974804 | 0        | 3.57214  | 2.15778  | 0.976246 | 4.797678 | 3.991002 | 2.071813    | 0.055574 | 0.949581 | 0.103559  | 0.906811 | 0.48707   | NA       |
| AT2G32890 | RALFL17   | 0        | 0        | 0        | 0         | 0        | 0        | 0        | 0        | 0        | 0        | 0        | 0           | #N/A     | #N/A     | #N/A      | #N/A     | #N/A      | #N/A     |
| AT2G32900 | ZW10      | 244.9142 | 239.089  | 261.3938 | 219.8175  | 221.9265 | 266.1565 | 267.6803 | 283.7481 | 197.2017 | 217.8146 | 267.3971 | 205.1095    | -0.08043 | 0.731317 | 0.00406   | 0.987793 | -0.11459  | 0.772775 |
| AT2G32905 | AT2G32905 | 0        | 0        | 0        | 0.412416  | 0.662467 | 0        | 0        | 0        | 0        | 0.959536 | 0        | 0           | 0.209973 | NA       | 0         | NA       | 0.170506  | NA       |
| AT2G32910 | AT2G32910 | 323.3819 | 297.9691 | 262.6815 | 253.2232  | 226.5638 | 262.1691 | 269.459  | 285.9058 | 268.4676 | 252.3579 | 242.1208 | 273.4793    | -0.25178 | 0.104815 | -0.10161  | 0.58815  | -0.19869  | 0.444825 |
| AT2G32920 | PDIL-3    | 404.2273 | 388.9656 | 397.8852 | 1022.378  | 963.2274 | 997.8376 | 816.3806 | 830.7453 | 986.0085 | 414.5194 | 353.8688 | 411.2549    | 1.309358 | 7.51E-28 | -0.130215 | 1.55E-20 | -0.01175  | 0.976392 |
| AT2G32930 | ZFN2      | 105.8125 | 98.13353 | 83.69753 | 113.8267  | 121.894  | 140.5545 | 112.0522 | 111.1257 | 95.67211 | 97.87263 | 97.11438 | 83.90843    | 0.365775 | 0.082826 | 0.144032  | 0.581619 | -0.04533  | 0.933316 |
| AT2G32940 | AGO6      | 24.96698 | 17.84246 | 34.76667 | 10.31039  | 9.937009 | 14.95261 | 13.33955 | 17.26224 | 3.904984 | 30.70514 | 33.25835 | 26.93357    | -1.05042 | 0.011264 | -1.03643  | 0.019426 | -0.190259 | 0.832911 |
| AT2G32950 | COP1      | 39.07399 | 421.0821 | 368.2691 | 388.0831  | 337.1958 | 383.7837 | 441.9838 | 449.8971 | 257.7289 | 401.0859 | 375.1542 | 412.2908    | -0.09326 | 0.710268 | -0.04301  | 0.880211 | 0.004794  | 0.99299  |
| AT2G32960 | AT2G32960 | 20.21137 | 28.54794 | 18.02716 | 37.52982  | 22.52389 | 39.87363 | 24.01119 | 20.49891 | 15.61994 | 36.46235 | 34.58868 | 30.04229    | 0.551955 | 0.145982 | -0.11209  | 0.830443 | 0.567692  | 0.337704 |
| AT2G32970 | AT2G32970 | 354.2934 | 363.9862 | 360.5432 | 251.1611  | 282.2111 | 281.1001 | 294.3559 | 306.4047 | 183.5342 | 355.0282 | 411.0732 | 39.295.2334 | -0.39662 | 0.058081 | -0.44755  | 0.037808 | -0.02496  | 0.963348 |
| AT2G32980 | AT2G32980 | 159.3131 | 210.541  | 180.2716 | 222.292   | 213.3145 | 196.3776 | 232.1082 | 227.6458 | 243.0853 | 155.4448 | 250.1028 | 194.7504    | 0.207873 | 0.337305 | 0.353783  | 0.095456 | 0.121793  | 0.768141 |
| AT2G32990 | AlGH988   | 136.724  | 82.07532 | 96.57408 | 20.62078  | 19.87402 | 25.91786 | 24.9005  | 26.97225 | 13.66744 | 89.23681 | 69.17737 | 71.47755    | -2.15227 | 2.27E-15 | -2.13688  | 9.1E-14  | -0.44209  | 0.318682 |
| AT2G33000 | AT2G33000 | 3.566712 | 0        | 0        | 0.824831  | 1.987402 | 0.996841 | 3.57214  | 3.23667  | 0.976246 | 0.959536 | 0        | 1.035907    | -0.03437 | 0.967601 | 0.455915  | 0.546599 | -0.26963  | NA       |
| AT2G33005 | AT2G33005 | 0        | 0        | 0        | 0         | 0        | 0        | 0        | 0        | 0        | 1.919071 | 0        | 0           | 0        | NA       | 0         | NA       | 0.256851  | NA       |
| AT2G33010 | AT2G33010 | 1.188904 | 0        | 1.287654 | 0         | 0        | 0        | 0.889303 | 0        | 0        | 1.919071 | 1.330334 | 1.035907    | -0.61504 | NA       | -0.30971  | NA       | 0.277823  | NA       |
| AT2G33020 | AtRLP24   | 17.83356 | 5.352738 | 9.01358  | 42.89122  | 35.77323 | 50.83888 | 36.46144 | 31.28781 | 20.50117 | 3.838143 | 2.660668 | 5.179533    | 1.730897 | 1.25E-05 | 1.216614  | 0.004694 | -1.07464  | 0.136895 |
| AT2G33030 | AtRLP25   | 0        | 0        | 0        | 0         | 0        | 0        | 0        | 0        | 0        | 0        | 0        | 0           | #N/A     | #N/A     | #N/A      | #N/A     | #N/A      | #N/A     |
| AT2G33040 | ATPC      | 2258.917 | 2405.164 | 2593.336 | 2382.112  | 2287.499 | 2269.806 | 1981.368 | 2089.81  | 1917.347 | 2523.579 | 2467.77  | 2392.944    | -0.06355 | 0.581264 | -0.27569  | 0.005218 | 0.025055  | 0.916471 |
| AT2G33050 | AtRLP26   | 32.10041 | 17.84246 | 15.45185 | 21.03319  | 25.17376 | 20.93366 | 28.45771 | 18.34113 | 30.26363 | 25.90746 | 26.60668 | 23.82585    | 0.007346 | 0.989025 | 0.197452  | 0.682076 | 0.174709  | 0.836577 |
| AT2G33051 | AT2G33051 | 0        | 0        | 0        | 0.824831  | 0        | 0        | 2.990522 | 0        | 1.07889  | 0.976246 | 3.838143 | 1.330334    | 0.512145 | 0.410224 | 0.28328   | 0.679085 | 0.707098  | NA       |
| AT2G33060 | AtRLP27   | 89.1678  | 101.702  | 99.14938 | 95.268    | 89.43308 | 110.6493 | 102.2699 | 115.4412 | 90.79088 | 98.83217 | 97.11438 | 122.237     | 0.020476 | 0.943829 | 0.089375  | 0.753109 | 0.138148  | 0.75415  |
| AT2G33070 | NSP2      | 2.377808 | 0        | 1.287654 | 4.948987  | 7.949607 | 2.990522 | 2.66791  | 1.07889  | 1.952492 | 2.878607 | 1.330334 | 1.035907    | 1.136978 | 0.07968  | 0.185091  | 0.831167 | 0.14016   | NA       |
| AT2G33080 | AtRLP28   | 2.377808 | 1.784246 | 0        | 42.06639  | 43.72284 | 36.88311 | 22.23259 | 28.05114 | 18.54867 | 0        | 0        | 1.035907    | 3.541273 | 1.31E-13 | 2.720618  | 4.93E-08 | -0.50383  | 0.666652 |
| AT2G33090 | AT2G33090 | 0        | 0        | 0        | 0         | 0        | 0.996841 | 0        | 0        | 0        | 0        | 0        | 0           | 0.15625  | NA       | 0         | NA       | 0         | NA       |
| AT2G33100 | CSLD1     | 2.377808 | 5.352738 | 1.287654 | 2.474493  | 1.987402 | 2.990522 | 2.66791  | 4.31556  | 0.976246 | 0.959536 | 0        | 1.035907    | -0.0883  | 0.917913 | -0.04465  | 0.960849 | -0.79262  | NA       |
| AT2G33110 | VAMP723   | 83.22328 | 110.6233 | 84.98519 | 165.7911  | 199.4026 | 141.5514 | 197.4254 | 18.6779  | 18.6779  | 180.6055 | 110.0564 | 106.4267    | 0.841317 | 0.007064 | 0.821396  | 0.001384 | -0.11139  | 0.852822 |
| AT2G33120 | VAMP722   | 676.4863 | 688.719  | 719.7988 | 937.4206  | 1150.043 | 1056.651 | 1167.655 | 950.502  | 1425.319 | 647.6865 | 710.3983 | 704.4164    | 0.581403 | 0.00025  | 0.752438  | 1.52E-06 | -0.01623  | 0.971789 |
| AT2G33130 | RALFL18   | 0        | 0        | 0        | 0.824831  | 1.987402 | 0        | 1.778607 | 0        | 1.952492 | 0        | 0        | 0           | 0.487892 | NA       | 0.584903  | NA       | 0         | NA       |
| AT2G33140 | AT2G33140 | 0        | 0        | 0        | 0         | 0        | 0        | 0        | 0        | 0        | 0        | 0        | 0           | #N/A     | #N/A     | #N/A      | #N/A     | #N/A      | #N/A     |
| AT2G33150 | PED1      | 2269.618 | 2517.571 | 2241.806 | 2687.3    | 2616.746 | 2895.822 | 3227.282 | 3666.068 | 3004.885 | 2309.602 | 2434.511 | 1946.468    | 0.22018  | 0.112828 | 0.489025  | 0.000148 | -0.07013  | 0.805161 |
| AT2G33160 | AT2G33160 | 0        | 0        | 0        | 1.649662  | 1.324935 | 0        | 2.66791  | 1.952492 | 0        | 0        | 0        | 0           | 0.564727 | 0.364346 | 1.013592  | 0.088581 | 0         | NA       |
| AT2G33170 | AT2G33170 | 273.4479 | 83.7773  | 172.5457 | 211.9816  | 193.4404 | 271.1407 | 287.245  | 263.2491 | 157.1756 | 140.0922 | 131.7031 | 142.9551    | 0.09011  | 0.780186 | 0.157025  | 0.621134 | -0.57921  | 0.119328 |
| AT2G33175 | AT2G33175 | 2.377808 | 8.92123  | 1.287654 | 14.848696 | 9.274542 | 14.95261 | 4.446517 | 5.39445  | 9.282738 | 2.878607 | 3.991002 | 4.143626    | 1.358358 | 0.051924 | 0.071833  | 0.931645 | -0.06189  | NA       |
| AT2G33180 | AT2G33180 | 228.2696 | 226.5992 | 256.2432 | 157.9552  | 204.7024 | 155.5072 | 175.1928 | 148.8868 | 259.6814 | 319.5254 | 268.7275 | 261.0484    | -0.44285 | 0.050306 | -0.27553  | 0.277985 | 0.249071  | 0.524843 |
| AT2G33190 | AT2G33190 | 0        | 0        | 0        | 0         | 0        | 0        | 1.778607 | 1.07889  | 0        | 0        | 0        | 0           | 0        | NA       | 0.460477  | NA       | 0         | NA       |
| AT2G33200 | AT2G33200 | 0        | 1.784246 | 0        | 0         | 1.987402 | 0        | 0        | 0        | 0        | 0        | 0        | 0           | 0.081425 | NA       | -0.22536  | NA       | -0.21936  | NA       |
| AT2G33205 | AT2G33205 | 5.94452  | 1.784246 | 7.725926 | 6.986499  | 5.299738 | 4.984204 | 7.114428 | 8.63112  | 4.88123  | 7.676285 | 6.65167  | 3.10772     | 0.056442 | 0.941698 | 0.251979  | 0.704392 | 0.070922  | NA       |
| AT2G33210 | HSP60-2   | 45.53991 | 396.1026 | 383.721  | 358.8015  | 365.0195 | 364.8437 | 310.3669 | 333.377  | 372.926  | 356.9473 | 407.0822 | 383.2854    | -0.18478 | 0.217625 | -0.28235  | 0.063574 | -0.11201  | 0.684126 |
| AT2G33220 | AT2G33220 | 387.5827 | 499.5889 | 482.8704 | 569.5459  | 554.4851 | 473.4994 | 409.9689 | 428.3193 | 824.9279 | 538.2995 | 480.2506 | 599.7899    | 0.215663 | 0.449009 | 0.270085  | 0.35153  | 0.232899  | 0.612836 |
| AT2G33230 | YUC7      | 0        | 0        | 0        | 0         | 0.662467 | 0.996841 | 0        | 0        | 0        | 0        | 1.330334 | 0           | 0.277017 | NA       | 0         | NA       | 0.200969  | NA       |
| AT2G33233 | LCR49     | 0        | 1.784246 | 0        | 0         | 0        | 0        | 0        | 0        | 0        | 0        | 0        | 0           | -0.2184  | NA       | -0.20558  | NA       | -0.19918  | NA       |
| AT2G33240 | XI-D      | 23.77808 | 12.48972 | 14.1642  | 7.42348   | 7.949607 | 7.974726 | 13.39955 | 12.96668 | 11.71495 | 15.35257 | 11.97301 | 19.68222    | -0.9879  | 0.026652 | -0.37717  | 0.47749  | -0.08864  | NA       |
| AT2G33250 | AT2G33250 | 312.6817 | 312.2431 | 337.3654 | 195.485   | 192.778  | 173.4377 | 216.1007 | 241.6713 | 246.9902 | 289.7798 | 335.2442 | 305.5924    | -0.75153 | 2.76E-08 | -0.44609  | 0.002225 | -0.05234  | 0.874874 |
| AT2G33255 | AT2G33255 | 197.3581 | 242.6575 | 266.5444 | 255.6977  | 260.3496 | 187.4061 | 168.9677 | 203.9102 | 277.2539 | 278.2653 | 295.3341 | 270.3716    | 0.002529 | 0.993564 | -0.1154   | 0.682218 | 0.249908  | 0.518301 |
| AT2G33260 | AT2G33260 | 1.188904 | 0        | 2.575309 | 0         | 0.662467 | 1.993682 | 1.778607 | 3.23667  | 0        | 0.959536 | 0        | 0           | -0.23151 | 0.750108 | 0.137662  | 0.862717 | -0.4193   | NA       |
| AT2G33270 | ACHT3     | 0        | 0        | 0        | 0         | 0        | 0        | 0        | 0        | 0        | 0        | 1.330334 | 0           | 0        | NA       | 0         | NA       | 0.172362  | NA       |
| AT2G33280 | AT        |          |          |          |           |          |          |          |          |          |          |          |             |          |          |           |          |           |          |

|           |           |          |          |          |          |          |          |          |          |          |          |          |          |           |           |          |          |          |          |
|-----------|-----------|----------|----------|----------|----------|----------|----------|----------|----------|----------|----------|----------|----------|-----------|-----------|----------|----------|----------|----------|
| AT2G33720 | AT2G33720 | 0        | 0        | 0        | 0        | 0.662467 | 0        | 0        | 1.07889  | 0.976246 | 0        | 1.330334 | 1.035907 | 0.077519  | NA        | 0.354806 | NA       | 0.390931 | NA       |
| AT2G33730 | RH21      | 789.4322 | 719.0512 | 616.7864 | 696.9823 | 686.9786 | 690.8107 | 578.0473 | 735.8029 | 780.2025 | 554.6116 | 590.6683 | 579.0717 | -0.03421  | 0.0861966 | -0.02244 | 0.915824 | -0.29802 | 0.192944 |
| AT2G33735 | AT2G33735 | 19.02246 | 33.90067 | 18.02716 | 49.48987 | 41.73544 | 25.91786 | 33.79353 | 29.13003 | 41.00233 | 41.26003 | 34.58868 | 34.18492 | 0.728695  | 0.041586  | 0.536101 | 0.181386 | 0.613969 | 0.278652 |
| AT2G33740 | CUTA      | 150.9908 | 201.6198 | 206.0247 | 310.5489 | 290.8231 | 241.2355 | 214.3221 | 254.618  | 316.3037 | 213.0169 | 234.1388 | 186.4632 | 0.587677  | 0.003816  | 0.48167  | 0.02576  | 0.178663 | 0.654955 |
| AT2G33750 | PUP2      | 9.511232 | 5.352738 | 6.438272 | 2.886909 | 3.312336 | 1.993682 | 5.335821 | 3.23667  | 2.928738 | 13.4435  | 10.64267 | 5.179533 | -0.07602  | 0.100849  | -0.63866 | 0.339607 | 0.355815 | NA       |
| AT2G33760 | PCMP-H6   | 13.07794 | 14.27397 | 11.58889 | 11.54764 | 10.59948 | 19.93682 | 5.335821 | 12.94668 | 11.71495 | 17.63285 | 13.30334 | 7.251346 | -0.13751  | 0.904702  | -0.31751 | 0.060454 | -0.39664 | NA       |
| AT2G33770 | UBC24     | 2060.371 | 1682.544 | 1688.115 | 1142.391 | 969.1896 | 1338.757 | 1519.82  | 1810.377 | 960.6261 | 1541.974 | 1303.727 | 1342.535 | -0.63552  | 0.003256  | -0.33016 | 0.174645 | -0.36342 | 0.29285  |
| AT2G33775 | RALFL19   | 1.188904 | 1.784246 | 0        | 0        | 0        | 0        | 0.889303 | 1.07889  | 0.976246 | 0.959536 | 0        | 2.071813 | -0.6533   | NA        | 0.042307 | NA       | 0.073162 | NA       |
| AT2G33780 | VQ13      | 0        | 0        | 0        | 0.412416 | 0        | 0        | 0        | 1.07889  | 0        | 0        | 0        | 0        | 0.064603  | NA        | 0.150774 | NA       | 0        | NA       |
| AT2G33790 | AGP30     | 0        | 0        | 0        | 0        | 0        | 0        | 0        | 0        | 0        | 0        | 0        | 0        | #N/A      | #N/A      | #N/A     | #N/A     | #N/A     | #N/A     |
| AT2G33793 | AT2G33793 | 26.15589 | 21.41095 | 34.76667 | 66.39891 | 57.63465 | 67.78517 | 39.12935 | 46.39227 | 50.76479 | 38.38143 | 25.27635 | 38.32854 | 1.128804  | 8.13E-05  | 0.651821 | 0.046863 | 0.278897 | 0.646179 |
| AT2G33796 | AT2G33796 | 0        | 0        | 0        | 0        | 0        | 0        | 0        | 0        | 0        | 0        | 0        | 0        | #N/A      | #N/A      | #N/A     | #N/A     | #N/A     | #N/A     |
| AT2G33800 | RP55      | 4091.018 | 4462.399 | 4430.819 | 3513.368 | 3226.216 | 3404.211 | 3803.551 | 4071.731 | 4959.33  | 5174.776 | 5764.337 | 4518.624 | -0.35142  | 0.012576  | -0.01635 | 0.934765 | 0.248356 | 0.253568 |
| AT2G33810 | SPL3      | 0        | 0        | 1.287654 | 0.412416 | 0        | 0.996841 | 0.889303 | 1.07889  | 0        | 0        | 1.330334 | 0        | -0.01646  | NA        | 0.108172 | NA       | -0.03172 | NA       |
| AT2G33815 | AT2G33815 | 0        | 0        | 0        | 0        | 0        | 0        | 0        | 0        | 0        | 0        | 0        | 0        | #N/A      | #N/A      | #N/A     | #N/A     | #N/A     | #N/A     |
| AT2G33820 | BAC1      | 73.71204 | 66.0171  | 78.54691 | 70.11065 | 74.8588  | 78.75042 | 64.91915 | 58.26006 | 41.97858 | 51.81492 | 86.47171 | 89.08796 | 0.023242  | 0.948943  | -0.38678 | 0.206138 | 0.041062 | 0.953945 |
| AT2G33830 | AT2G33830 | 611.0966 | 954.5716 | 704.3469 | 3485.324 | 3315.649 | 3453.056 | 7098.42  | 8240.561 | 14943.4  | 609.3051 | 721.041  | 661.944  | 2.086409  | 9.94E-20  | 3.588251 | 2.21E-57 | -0.17868 | 0.723515 |
| AT2G33835 | FES1      | 104.6235 | 155.2294 | 100.3437 | 96.50524 | 94.73282 | 92.70619 | 119.1667 | 146.729  | 92.74337 | 124.7396 | 109.0874 | 120.1652 | -0.31254  | 0.204976  | 0.008705 | 0.978758 | -0.00325 | 0.996489 |
| AT2G33840 | AT2G33840 | 236.5919 | 240.8732 | 270.4074 | 220.2299 | 237.8258 | 241.2355 | 242.7799 | 215.778  | 181.5818 | 300.3347 | 301.9858 | 257.9407 | -0.10025  | 0.608177  | -0.22007 | 0.246349 | 0.196272 | 0.499757 |
| AT2G33845 | AT2G33845 | 211.6249 | 203.404  | 222.7642 | 323.7462 | 337.8583 | 321.9796 | 176.0821 | 212.5413 | 241.1328 | 254.2769 | 248.7725 | 186.4632 | 0.611229  | 0.000362  | -0.02237 | 0.931549 | 0.10603  | 0.781547 |
| AT2G33847 | AT2G33847 | 0        | 3.568492 | 0        | 3.71174  | 3.974804 | 4.984204 | 2.66791  | 3.23667  | 0.972462 | 0        | 2.666068 | 3.10772  | 0.978039  | 0.141111  | 0.433742 | 0.578961 | 0.291913 | NA       |
| AT2G33850 | AT2G33850 | 184.2801 | 315.8115 | 249.8049 | 345.1918 | 281.5486 | 306.0301 | 216.99   | 236.2769 | 310.4642 | 320.4849 | 324.6015 | 304.5565 | 0.318599  | 0.151893  | 0.035412 | 0.905281 | 0.341004 | 0.310326 |
| AT2G33855 | AT2G33855 | 130.7794 | 149.8767 | 158.3815 | 137.3344 | 143.7554 | 117.6272 | 149.403  | 91.70564 | 239.1803 | 171.7569 | 180.9254 | 166.781  | -0.12766  | 0.709465  | 0.12681  | 0.727692 | 0.231224 | 0.662311 |
| AT2G33860 | ARF3      | 275.8257 | 253.3629 | 233.0654 | 258.997  | 206.6898 | 225.286  | 216.99   | 202.8313 | 220.6316 | 240.8434 | 195.5591 | 228.9353 | -0.13427  | 0.479178  | -0.24691 | 0.187417 | -0.18845 | 0.530711 |
| AT2G33870 | RABA1H    | 1.188904 | 0        | 0        | 0.412416 | 0        | 0        | 0        | 0        | 0        | 0        | 0        | 0        | -0.10956  | NA        | -0.19607 | NA       | -0.18704 | NA       |
| AT2G33880 | WOX9      | 14.26685 | 7.136984 | 0        | 0.412416 | 1.324935 | 0.996841 | 0.889303 | 0        | 5.757214 | 5.321336 | 4.143626 | 0        | -1.5889   | 0.011909  | -1.77801 | 0.005115 | -0.31936 | NA       |
| AT2G33890 | AT2G33890 | 0        | 0        | 0        | 0.412416 | 0        | 0        | 0        | 0        | 0        | 0        | 1.330334 | 0        | 0.067751  | NA        | 0        | NA       | 0.180865 | NA       |
| AT2G33900 | AT2G33900 | 0        | 0        | 1.287654 | 0.412416 | 0        | 0.996841 | 0.889303 | 0        | 0        | 0        | 2.666068 | 1.035907 | -0.02994  | NA        | -0.08852 | NA       | 0.328161 | NA       |
| AT2G33910 | AT2G33910 | 1.188904 | 0        | 0        | 1.237247 | 0        | 0        | 0        | 0        | 0        | 0        | 0        | 0        | 0.036838  | NA        | -0.17954 | NA       | -0.17515 | NA       |
| AT2G33920 | AT2G33920 | 0        | 0        | 0        | 0        | 0        | 0        | 0        | 0        | 0.976246 | 0.959536 | 0        | 0        | 0         | NA        | 0.146371 | NA       | 0.148275 | NA       |
| AT2G33930 | AT2G33930 | 0        | 1.784246 | 0        | 0        | 1.324935 | 0        | 0.889303 | 1.07889  | 0        | 0        | 0        | 0        | -0.02577  | NA        | 0.074347 | NA       | -0.26237 | NA       |
| AT2G33940 | AT2G33940 | 1.188904 | 1.784246 | 0        | 0        | 0        | 0        | 0        | 0        | 0        | 0.959536 | 0        | 0        | -0.5209   | NA        | -0.48545 | NA       | -0.27068 | NA       |
| AT2G33950 | AT2G33950 | 0        | 0        | 0        | 0        | 0        | 0        | 0        | 0        | 0        | 0        | 0        | 0        | #N/A      | #N/A      | #N/A     | #N/A     | #N/A     | #N/A     |
| AT2G33960 | AT2G33960 | 0        | 0        | 0        | 0.662467 | 0        | 1.07889  | 0        | 0.959536 | 1.330334 | 0        | 0        | 0        | 0.092458  | NA        | 0.172513 | NA       | 0.370737 | NA       |
| AT2G33970 | AT2G33970 | 0        | 0        | 0        | 0.412416 | 0        | 0        | 0        | 0        | 0.976246 | 0        | 0        | 0        | 0.065752  | NA        | 0.143461 | NA       | 0        | NA       |
| AT2G33980 | NUDT22    | 58.25629 | 51.74313 | 69.53333 | 85.37002 | 78.17114 | 58.81361 | 101.3806 | 91.70564 | 73.21845 | 60.45074 | 62.5257  | 88.05205 | 0.301933  | 0.297342  | 0.534765 | 0.057811 | 0.21455  | 0.684666 |
| AT2G33990 | iqd9      | 241.3475 | 248.0102 | 265.2568 | 186.8243 | 193.4404 | 172.4535 | 173.4142 | 167.2279 | 197.2017 | 236.0458 | 247.4421 | 244.4739 | -0.43814  | 0.002934  | -0.48071 | 0.001786 | -0.05235 | 0.880322 |
| AT2G34000 | AT2G34000 | 0        | 0        | 1.287654 | 0.824831 | 3.312336 | 0        | 2.66791  | 1.07889  | 2.928738 | 4.959862 | 2.666068 | 1.035907 | 0.394205  | 0.585681  | 0.693745 | 0.322085 | 0.418877 | NA       |
| AT2G34010 | AT2G34010 | 40.42273 | 39.25341 | 45.0675  | 10.31039 | 15.23675 | 11.96209 | 15.56095 | 5.39445  | 8.786214 | 0.959817 | 34.58868 | 50.75942 | -1.99972  | 1.28E-06  | -1.99972 | 4.64E-08 | 0.07464  | 0.927039 |
| AT2G34020 | AT2G34020 | 0        | 0        | 0        | 0        | 0        | 0        | 0        | 0        | 0        | 0        | 1.330334 | 0        | 0         | NA        | 0        | NA       | 0.172362 | NA       |
| AT2G34030 | AT2G34030 | 4.755616 | 0        | 3.862963 | 1.237247 | 1.324935 | 1.993682 | 1.778607 | 0        | 2.928738 | 1.919071 | 3.991002 | 3.10772  | -0.55384  | 0.445319  | -0.46793 | 0.546827 | -0.0209  | NA       |
| AT2G34040 | AT2G34040 | 495.7729 | 474.6094 | 440.3778 | 634.7076 | 527.3239 | 616.0476 | 509.5709 | 578.285  | 526.1966 | 483.606  | 466.9472 | 502.4147 | 0.330599  | 0.012981  | 0.190677 | 0.207962 | 0.042782 | 0.893141 |
| AT2G34050 | AT2G34050 | 49.93397 | 66.0171  | 78.54691 | 65.16166 | 72.20893 | 66.78833 | 59.58333 | 45.31338 | 57.59851 | 56.6126  | 43.90102 | 81.83662 | -0.071324 | 0.840347  | -0.23681 | 0.489291 | -0.0722  | 0.916999 |
| AT2G34060 | PER19     | 57.06739 | 57.09587 | 59.2321  | 21.85803 | 37.09817 | 19.93682 | 29.34701 | 47.47116 | 33.19236 | 68.12703 | 51.88302 | 55.93895 | -0.15269  | 0.000392  | -0.62429 | 0.05834  | -0.02833 | 0.972983 |
| AT2G34070 | TLB37     | 144.6313 | 174.8561 | 157.0938 | 214.0437 | 210.0021 | 291.0775 | 169.857  | 201.7524 | 24.5366  | 129.5373 | 81.15037 | 134.6678 | 0.553625  | 0.012762  | 0.304354 | 0.231647 | -0.4436  | 0.208473 |
| AT2G34080 | AT2G34080 | 5.94852  | 5.568492 | 3.862963 | 2.62078  | 15.23675 | 20.93366 | 20.01119 | 34.52448 | 29.28378 | 12.47396 | 13.30334 | 9.323159 | 1.581741  | 0.000526  | 2.149812 | 1.46E-06 | 0.956678 | 0.200179 |
| AT2G34090 | MEE18     | 101.0568 | 114.1917 | 86.27284 | 191.7732 | 192.778  | 195.3808 | 190.3109 | 208.2258 | 190.368  | 127.6182 | 139.6851 | 112.9138 | 0.933664  | 3.65E-08  | 0.954367 | 3.55E-08 | 0.330662 | 0.271055 |
| AT2G34100 | AT2G34100 | 0        | 0        | 1.287654 | 0        | 0        | 0        | 0        | 1.07889  | 0        | 0        | 0        | 1.035907 | -0.25532  | NA        | -0.03893 | NA       | -0.0356  | NA       |
| AT2G34110 | AT2G34110 | 0        | 0        | 0        | 0        | 0        | 0        | 0        | 0        | 0        | 0        | 0        | 0        | #N/A      | #N/A      | #N/A     | #N/A     | #N/A     | #N/A     |
| AT2G34120 | AT2G34120 | 0        | 0        | 0        | 0        | 0        | 0        | 0        | 0        | 0        | 0        | 0        | 0        | #N/A      | #N/A      | #N/A     | #N/A     | #N/A     | #N/A     |
| AT2G34123 | AT2G34123 | 0        | 0        | 0        | 0        | 0        | 0.889303 | 0        | 0        | 0        | 0        | 0        | 0        | 0         | NA        | 0.160764 | NA       | 0        | NA       |
| AT2G34130 | MEE19     | 1.188904 | 0        | 0        | 0        | 0        | 0        | 0        | 1.07889  | 0        | 0        | 2.666068 | 0        | -0.24805  | NA        | -0.03605 | NA       | 0.167713 | NA       |
| AT2G34135 | AT2G34135 | 0        | 0        | 0        | 0        | 0        | 0        | 0        | 0        | 0        | 0        | 0        | 0        | #N/A      | #N/A      | #N/A     | #N/A     | #N/A     | #N/A     |
| AT2G34140 | CDF4      | 2.377808 | 5.352738 | 1.287654 | 6.598649 | 5.962205 | 9.968408 | 11.56095 | 14.02557 | 17.57243 | 1.919071 | 2.666068 | 9.323159 | 0.863344  | 0.152665  | 1.656617 | 0.003458 | 0.395412 | NA       |
| AT2G34150 | SCAR1     | 129.5905 | 132.0342 | 153.2309 | 90.31901 | 82.80841 | 86.72515 | 65.80846 | 76.60119 | 37.09735 | 142.0113 | 162.3007 | 138.8115 | -0.65178  | 0.003533  | -1.16737 | 2.77E-07 | 0.088367 | 0.864614 |
| AT2G34160 | AT2G34160 | 187.8468 | 235.5205 | 213.7506 | 296.2568 | 356.4074 | 263.166  | 283.6878 | 261.0914 | 394.4034 | 319.5254 | 363.1812 | 240.3303 | 0.546331  | 0.017283  | 0.546331 | 0.017283 | 0.518868 | 0.09848  |
| AT2G34170 | AT2G34170 | 401.8495 | 394.3184 | 338.6531 | 128.6737 | 103.3449 | 150.523  | 144.0672 | 172.6224 | 113.2445 | 330.0803 | 372.4935 |          |           |           |          |          |          |          |

|           |           |          |          |          |          |          |          |          |          |          |          |          |          |           |          |          |          |           |          |
|-----------|-----------|----------|----------|----------|----------|----------|----------|----------|----------|----------|----------|----------|----------|-----------|----------|----------|----------|-----------|----------|
| AT2G34560 | AT2G34560 | 751.3873 | 735.1094 | 788.0445 | 499.4353 | 440.5407 | 500.4141 | 525.5784 | 509.2361 | 414.9045 | 1074.68  | 1122.802 | 899.1669 | -0.65119  | 2.63E-06 | -0.64129 | 5.71E-06 | 0.438002  | 0.016586 |
| AT2G34570 | MEE21     | 65.38972 | 58.88012 | 66.95803 | 103.1039 | 107.3197 | 70.7757  | 85.37313 | 78.75897 | 92.74337 | 62.36982 | 49.22236 | 54.90305 | 0.547883  | 0.025026 | 0.403867 | 0.139021 | -0.18946  | 0.71301  |
| AT2G34580 | AT2G34580 | 0        | 1.784246 | 1.287654 | 11.13522 | 7.28714  | 7.974726 | 4.446517 | 9.710009 | 7.809968 | 0        | 0        | 0        | 1.861213  | 0.001781 | 1.575796 | 0.012099 | -0.53562  | NA       |
| AT2G34585 | AT2G34585 | 177.1467 | 203.404  | 218.9012 | 306.8372 | 268.2992 | 189.3997 | 170.7463 | 159.6757 | 454.9306 | 220.6932 | 324.6015 | 254.833  | 0.310987  | 0.51363  | 0.343335 | 0.487774 | 0.365866  | 0.632297 |
| AT2G34590 | E1-BETA-2 | 649.1416 | 615.5649 | 643.8272 | 399.6307 | 395.493  | 409.7016 | 344.1604 | 417.5304 | 598.4388 | 531.5827 | 510.8482 | 581.1736 | -0.64994  | 0.000329 | -0.47902 | 0.012638 | -0.22802  | 0.484078 |
| AT2G34600 | TIFY 5B   | 4.755616 | 1.784246 | 1.287654 | 14.43455 | 19.87402 | 20.93366 | 33.79615 | 33.69353 | 3.831143 | 15.96401 | 51.96401 | 51.14933 | 1.982129  | 0.000138 | 2.968129 | 3.26E-10 | 0.877647  | 0.380806 |
| AT2G34610 | AT2G34610 | 0        | 0        | 2.575309 | 18.5587  | 13.91181 | 15.09495 | 14.22886 | 10.7889  | 7.809968 | 0        | 1.330334 | 1.035970 | 2.534264  | 3.64E-06 | 2.0097   | 0.000493 | -0.17525  | NA       |
| AT2G34620 | AT2G34620 | 877.4111 | 858.2223 | 902.6457 | 295.2896 | 346.4704 | 504.9644 | 308.5883 | 294.537  | 287.9926 | 1141.847 | 1233.22  | 1058.696 | -1.46711  | 1.15E-38 | -1.5492  | 1.28E-40 | 0.375378  | 0.013285 |
| AT2G34630 | SPS3      | 243.7253 | 271.2054 | 257.5309 | 339.418  | 371.6441 | 311.0143 | 312.1455 | 303.1681 | 253.824  | 230.2886 | 274.0488 | 244.4739 | 0.404639  | 0.009243 | 0.171154 | 0.358791 | -0.0451   | 0.907091 |
| AT2G34640 | PTAC12    | 640.8192 | 540.6265 | 576.8691 | 515.5195 | 510.7623 | 533.3098 | 554.0361 | 625.7562 | 715.5883 | 652.8482 | 730.3533 | 698.201  | -0.17533  | 0.244892 | 0.102946 | 0.546827 | 0.235579  | 0.280199 |
| AT2G34650 | PID       | 61.82301 | 37.46917 | 46.35556 | 52.37678 | 60.94699 | 74.76306 | 46.24378 | 51.78672 | 50.76479 | 39.34096 | 53.21336 | 31.0772  | 0.312089  | 0.32084  | 0.006063 | 0.988286 | -0.25939  | 0.651908 |
| AT2G34655 | AT2G34655 | 181.9023 | 158.7979 | 193.1482 | 143.933  | 143.7554 | 96.69356 | 58.69403 | 65.81229 | 106.4108 | 91.15588 | 55.87403 | 93.23159 | -0.44488  | 0.107623 | -1.15414 | 0.000011 | -0.17732  | 0.000574 |
| AT2G34660 | ABCC2     | 575.4295 | 442.493  | 374.7074 | 261.4715 | 229.2137 | 317.9922 | 364.6144 | 429.3982 | 331.9236 | 427.9529 | 514.8392 | 459.9425 | -0.77135  | 5.24E-05 | -0.30185 | 0.171466 | 0.006708  | 0.990348 |
| AT2G34670 | AT2G34670 | 53.50068 | 46.3904  | 72.10864 | 36.29257 | 37.76063 | 37.87995 | 41.79726 | 44.23449 | 43.93107 | 53.734   | 53.21336 | 67.33392 | -0.60875  | 0.023483 | -0.39918 | 0.189414 | 0.009325  | 0.990348 |
| AT2G34680 | AIR9      | 1129.459 | 758.3046 | 779.0309 | 298.1765 | 294.1355 | 346.9006 | 316.592  | 376.5326 | 299.7075 | 793.536  | 788.888  | 800.7557 | -1.48135  | 1.33E-19 | -1.39993 | 2.92E-17 | -0.16168  | 0.625212 |
| AT2G34690 | ACD11     | 224.7028 | 262.2842 | 301.3111 | 392.6196 | 390.8557 | 318.989  | 369.0609 | 357.1126 | 442.2394 | 244.6816 | 208.8624 | 290.0538 | 0.47875   | 0.009606 | 0.556642 | 0.002881 | -0.07735  | 0.858201 |
| AT2G34700 | AT2G34700 | 0        | 0        | 0        | 0        | 0        | 0        | 0.889303 | 0        | 0        | 0.959536 | 0        | 0        | 0         | 0        | 0        | 0        | 0.147196  | NA       |
| AT2G34710 | ATHB-14   | 618.2301 | 519.2156 | 481.5827 | 333.6442 | 284.1985 | 402.7237 | 382.4005 | 383.0059 | 247.9665 | 530.6232 | 446.9922 | 440.2603 | -0.65231  | 0.001224 | -0.65846 | 0.001419 | -0.18621  | 0.628866 |
| AT2G34720 | NFYA      | 227.0807 | 271.2054 | 239.5037 | 279.6178 | 243.788  | 236.2513 | 145.8458 | 174.7802 | 136.6744 | 267.7104 | 276.7095 | 248.6171 | 0.055339  | 0.788464 | -0.67369 | 0.73E-05 | 0.10781   | 0.749335 |
| AT2G34730 | WAP       | 243.7253 | 221.2465 | 199.5864 | 183.5249 | 198.7402 | 209.3366 | 207.1077 | 215.778  | 212.8216 | 185.1904 | 199.5501 | 220.6481 | -0.17372  | 0.322252 | -0.06479 | 0.763149 | -0.13435  | 0.668334 |
| AT2G34740 | AT2G34740 | 0        | 0        | 0        | 0        | 0        | 0        | 0        | 0        | 0        | 0        | 0        | 0        | #N/A      | #N/A     | #N/A     | #N/A     | #N/A      | #N/A     |
| AT2G34750 | AT2G34750 | 861.9554 | 861.7908 | 804.784  | 677.5988 | 701.5528 | 780.5263 | 723.893  | 756.3018 | 637.4886 | 746.5187 | 734.3444 | 682.6624 | -0.22824  | 0.071402 | -0.25318 | 0.05303  | -0.22236  | 0.244289 |
| AT2G34760 | AT2G34760 | 1.188904 | 0        | 0        | 0.412416 | 0.662467 | 0.996841 | 3.557214 | 0        | 0        | 0        | 5.321336 | 2.071813 | 0.043312  | 0.955848 | 0.305092 | 0.672371 | 0.658482  | NA       |
| AT2G34770 | FAH1      | 445.839  | 528.1368 | 552.4037 | 450.3578 | 439.2158 | 570.1929 | 490.8955 | 536.2083 | 608.2013 | 426.9934 | 423.0462 | 463.0502 | -0.06661  | 0.741677 | 0.099353 | 0.627741 | -0.21105  | 0.449709 |
| AT2G34780 | MEE22     | 293.6593 | 248.0102 | 221.4765 | 158.0663 | 137.1307 | 162.485  | 169.857  | 158.5968 | 137.6507 | 219.7337 | 226.1568 | 216.5045 | -0.73894  | 5.79E-06 | -0.6993  | 3.78E-05 | -0.20418  | 0.500683 |
| AT2G34790 | MEE23     | 20.21137 | 24.97944 | 15.45185 | 16.49662 | 13.91181 | 15.94945 | 10.67164 | 15.10446 | 14.64369 | 30.70514 | 19.95501 | 19.68222 | -0.32374  | 0.473969 | -0.50337 | 0.284064 | 0.228933  | 0.781547 |
| AT2G34800 | AT2G34800 | 0        | 0        | 0        | 0        | 0        | 0        | 0        | 0        | 0        | 0        | 0        | 0        | #N/A      | #N/A     | #N/A     | #N/A     | #N/A      | #N/A     |
| AT2G34810 | AT2G34810 | 206.8693 | 140.9554 | 194.4358 | 289.9281 | 320.6342 | 461.5373 | 514.0174 | 460.686  | 554.5077 | 313.7682 | 274.0488 | 225.8276 | 0.933372  | 0.000012 | 1.438323 | 3.49E-12 | 0.555124  | 0.075725 |
| AT2G34820 | BHLH53    | 0        | 0        | 0        | 0        | 0        | 0        | 0        | 1.07889  | 0.976246 | 0        | 0        | 0        | 0         | 0        | 0        | 0        | 0.333168  | NA       |
| AT2G34825 | RALFL20   | 0        | 0        | 0        | 0        | 0        | 0        | 0        | 0        | 0        | 0        | 0        | 0        | #N/A      | #N/A     | #N/A     | #N/A     | #N/A      | #N/A     |
| AT2G34830 | WRKY35    | 9.511232 | 3.568492 | 2.575309 | 5.773818 | 7.28714  | 2.990522 | 2.66791  | 4.31556  | 3.904984 | 11.51443 | 3.991002 | 2.071813 | 0.02823   | 0.972088 | -0.36728 | 0.632583 | 0.11055   | NA       |
| AT2G34835 | AT2G34835 | 0        | 0        | 0        | 0        | 0        | 0        | 0        | 0        | 0        | 0        | 0        | 0        | #N/A      | #N/A     | #N/A     | #N/A     | #N/A      | #N/A     |
| AT2G34840 | AT2G34840 | 145.0463 | 149.8767 | 163.5321 | 202.9085 | 229.8761 | 178.4345 | 183.1965 | 138.0979 | 150.3419 | 147.7685 | 142.3457 | 147.0987 | 0.411531  | 0.026072 | 0.043415 | 0.863991 | -0.06633  | 0.88006  |
| AT2G34850 | MEE25     | 17.83356 | 19.62671 | 24.46543 | 23.09527 | 17.88662 | 15.94945 | 12.34328 | 18.34113 | 18.54867 | 22.06932 | 19.91002 | 27.96948 | -0.048424 | 0.862925 | -0.07292 | 0.884074 | 0.468107  | 0.474444 |
| AT2G34860 | EDA3      | 1144.915 | 1250.756 | 1236.148 | 1199.717 | 1309.698 | 990.8597 | 1494.03  | 1363.717 | 1693.787 | 1799.129 | 2141.838 | 1550.752 | -0.05042  | 0.811881 | 0.320725 | 0.067643 | 0.586004  | 0.002837 |
| AT2G34870 | MEE26     | 0        | 0        | 0        | 0        | 0        | 0        | 0.889303 | 0        | 0        | 0        | 0        | 0        | 0         | 0        | 0        | 0        | 0.160764  | NA       |
| AT2G34880 | JMJ15     | 0        | 0        | 0        | 0        | 0.662467 | 0        | 0        | 0        | 0        | 1.919071 | 2.660668 | 2.071813 | 0.057869  | NA       | 0        | NA       | 1.033471  | NA       |
| AT2G34890 | AT2G34890 | 0        | 0        | 1.287654 | 0.662467 | 0        | 0        | 1.07889  | 0        | 0        | 0        | 0        | 0        | -0.10214  | NA       | -0.03656 | NA       | -0.21558  | NA       |
| AT2G34900 | GTE1      | 147.4421 | 178.4246 | 1.764086 | 202.9085 | 229.2137 | 201.3618 | 186.7537 | 188.8057 | 256.7527 | 192.8667 | 167.6221 | 182.3195 | 0.333188  | 0.085617 | 0.329904 | 0.108247 | 0.117732  | 0.767772 |
| AT2G34910 | AT2G34910 | 1.188904 | 0        | 0        | 0.662467 | 0        | 0        | 1.07889  | 0        | 0        | 0        | 0        | 0        | -0.09359  | NA       | -0.02854 | NA       | -0.02699  | NA       |
| AT2G34920 | EDA18     | 38.04493 | 41.03766 | 41.20494 | 25.15735 | 31.13596 | 29.90522 | 30.23632 | 45.31338 | 21.47741 | 47.01725 | 33.25835 | 40.40035 | -0.45835  | 0.180805 | -0.25935 | 0.454119 | -0.109331 | 0.983797 |
| AT2G34925 | CLE42     | 22.58917 | 42.8219  | 23.17778 | 18.5587  | 33.12336 | 13.95577 | 16.00746 | 15.10446 | 18.54867 | 32.62421 | 59.86503 | 34.18492 | -0.34375  | 0.452334 | -0.69909 | 0.122348 | 0.48316   | 0.482633 |
| AT2G34930 | AT2G34930 | 279.3924 | 203.404  | 218.9012 | 79.59621 | 84.13334 | 153.1535 | 167.8191 | 162.9124 | 95.57709 | 233.1672 | 216.8444 | 191.6427 | -1.1116   | 2.21E-06 | -0.67629 | 0.016687 | -0.1259   | 0.836577 |
| AT2G34940 | VSR5      | 26.15589 | 30.33218 | 28.3284  | 80.83345 | 72.8714  | 75.7599  | 26.6791  | 19.42002 | 18.54867 | 6.838211 | 13.30334 | 13.46678 | 1.391944  | 1.04E-06 | -0.34474 | 0.388675 | -0.12097  | 0.0176   |
| AT2G34950 | AT2G34950 | 0        | 0        | 0        | 0        | 0        | 0        | 0        | 0        | 0        | 0        | 0        | 0        | #N/A      | #N/A     | #N/A     | #N/A     | #N/A      | #N/A     |
| AT2G34960 | CAT5      | 24.96698 | 24.97944 | 19.31482 | 54.02644 | 52.33491 | 56.81992 | 60.47264 | 61.49673 | 43.93107 | 23.02886 | 22.61568 | 21.75404 | 1.159299  | 9.24E-05 | 1.181427 | 0.000113 | -0.03722  | 0.968668 |
| AT2G34970 | AT2G34970 | 263.9367 | 244.4417 | 244.6543 | 203.7333 | 231.8635 | 188.4029 | 261.4552 | 267.5647 | 260.6577 | 215.8955 | 236.7994 | 283.8384 | -0.26517  | 0.120773 | 0.065235 | 0.764953 | -0.03337  | 0.936323 |
| AT2G34980 | SETH1     | 24.96698 | 10.70548 | 11.58889 | 10.7228  | 9.937009 | 14.95261 | 15.11816 | 8.63112  | 8.786214 | 13.4335  | 17.29434 | 12.43088 | -0.40547  | 0.427446 | -0.47284 | 0.385917 | -0.15242  | NA       |
| AT2G34985 | AT2G34985 | 0        | 0        | 0        | 0        | 0        | 0        | 0        | 0        | 0        | 0        | 0        | 0        | #N/A      | #N/A     | #N/A     | #N/A     | #N/A      | #N/A     |
| AT2G34990 | ATL38     | 0        | 0        | 1.237247 | 0.662467 | 0        | 0        | 0        | 0        | 0        | 1.330334 | 0        | 0        | 0.359185  | NA       | 0.09386  | NA       | 0.192946  | NA       |
| AT2G35000 | ATL9      | 0        | 3.568492 | 2.575309 | 15.61719 | 9.274542 | 8.971567 | 4.446517 | 5.39445  | 10.73871 | 1.919071 | 1.330334 | 2.071813 | 1.724307  | 0.002916 | 1.08695  | 0.093686 | -0.08199  | NA       |
| AT2G35010 | ATP1      | 158.1242 | 133.8185 | 133.9161 | 217.7554 | 208.0147 | 212.3271 | 168.0784 | 155.3602 | 230.3941 | 154.4852 | 86.47171 | 166.781  | 0.559408  | 0.020059 | 0.361866 | 0.178602 | -0.05331  | 0.931292 |
| AT2G35020 | SLCNA1PUB | 248.4809 | 251.5787 | 224.0519 | 340.6553 | 263.662  | 293.0712 | 241.0012 | 253.5391 | 234.299  | 169.8378 | 178.2648 | 247.5817 | 0.308787  | 0.109039 | 0.101208 | 0.969451 | -0.27163  | 0.389544 |
| AT2G35030 | PCMP-E15  | 35.66712 | 39.25341 | 33.47901 | 35.46774 | 35.11077 | 33.89259 | 29.3     |          |          |          |          |          |           |          |          |          |           |          |

|           |           |          |          |          |          |          |          |          |          |          |          |          |           |          |          |          |           |          |          |
|-----------|-----------|----------|----------|----------|----------|----------|----------|----------|----------|----------|----------|----------|-----------|----------|----------|----------|-----------|----------|----------|
| ATZG35480 | ATZG35480 | 19.02246 | 19.62671 | 27.04074 | 42.06639 | 46.37271 | 43.86099 | 44.46517 | 31.28781 | 37.09735 | 20.15025 | 29.26735 | 17.61041  | 0.929005 | 0.004362 | 0.717071 | 0.04542   | -0.00776 | 0.993315 |
| ATZG35490 | PAP3      | 787.0544 | 824.3217 | 727.5247 | 582.7432 | 596.2205 | 584.1487 | 715      | 844.7708 | 835.6666 | 805.0504 | 931.2338 | 771.7504  | -0.40183 | 0.00159  | 0.034827 | 0.84609   | 0.099177 | 0.697022 |
| ATZG35500 | SKL2      | 537.3846 | 465.6882 | 527.9383 | 398.8059 | 381.5811 | 384.7805 | 476.6667 | 490.8949 | 492.028  | 729.2471 | 725.032  | 629.8312  | -0.39343 | 0.00133  | -0.07322 | 0.648618  | 0.435491 | 0.003567 |
| ATZG35510 | SRO1      | 557.596  | 583.4485 | 493.1716 | 490.7745 | 446.5029 | 619.0381 | 582.4938 | 655.9651 | 548.6502 | 449.0627 | 546.7673 | 456.8348  | -0.07215 | 0.729288 | 0.127894 | 0.531551  | -0.16775 | 0.587439 |
| ATZG35520 | DAD2      | 53.50068 | 80.29107 | 60.51975 | 127.8488 | 132.4935 | 102.6746 | 102.6699 | 86.3112  | 139.6302 | 77.72239 | 97.11438 | 131.6601  | 0.878648 | 0.000955 | 0.733598 | 0.009239  | 0.636569 | 0.106767 |
| ATZG35530 | bZ1P16    | 123.646  | 124.8972 | 118.4642 | 138.984  | 114.6068 | 123.6083 | 119.2169 | 110.3457 | 101.5296 | 88.27728 | 78.4897  | 104.6266  | 0.047181 | 0.855138 | -0.06186 | 0.824246  | -0.41493 | 0.188272 |
| ATZG35540 | ATZG35540 | 86.78999 | 55.31163 | 32.19136 | 63.09958 | 53.65985 | 57.81677 | 72.92289 | 79.83766 | 86.88599 | 59.49121 | 67.84703 | 48.68761  | -0.00467 | 0.991042 | 0.42307  | 0.208245  | -0.00234 | 0.99758  |
| ATZG35550 | BCP7      | 7.133424 | 12.48972 | 14.1642  | 9.485558 | 20.53649 | 4.984204 | 16.00746 | 11.76719 | 11.67719 | 17.2164  | 11.97301 | 8.28752   | 0.470383 | 0.916889 | 0.200103 | 0.766048  | -0.18513 | NA       |
| ATZG35570 | ATZG35570 | 0        | 3.568492 | 0        | 0.824831 | 1.987402 | 0.996841 | 6.225124 | 2.15778  | 2.928738 | 0        | 5.321336 | 5.179533  | 0.010089 | 0.990839 | 8.809582 | 0.255157  | 0.701957 | NA       |
| ATZG35580 | ATZG35580 | 0        | 1.784246 | 0        | 0        | 0        | 0        | 0.889303 | 0        | 0        | 0        | 0        | 0         | -0.26522 | NA       | -0.08117 | NA        | -0.24296 | NA       |
| ATZG35585 | ATZG35585 | 2.377808 | 7.136984 | 3.862963 | 6.186234 | 2.649869 | 2.990522 | 8.003731 | 2.15778  | 3.904984 | 6.716749 | 3.991002 | 7.251346  | -0.03991 | 0.961026 | 0.107043 | 0.89853   | -0.34852 | NA       |
| ATZG35590 | ATZG35590 | 4.755616 | 0        | 2.575309 | 2.474493 | 2.649869 | 2.990522 | 8.003731 | 2.15778  | 5.87476  | 2.878607 | 3.991002 | 5.179533  | -0.0407  | 0.961219 | 0.644352 | 0.3713    | 0.33641  | NA       |
| ATZG35600 | BRXL1     | 11.88904 | 8.92123  | 9.01358  | 6.186234 | 9.937009 | 8.971567 | 10.67164 | 17.26224 | 6.833722 | 5.757214 | 13.30334 | 9.323159  | -0.24189 | 0.692491 | 0.163368 | 0.810756  | -0.09493 | NA       |
| ATZG35605 | ATZG35605 | 61.82301 | 41.03766 | 54.08148 | 91.55626 | 107.3197 | 77.75358 | 64.02985 | 48.55005 | 94.69586 | 38.38143 | 31.92802 | 43.50807  | 0.76612  | 0.007597 | 0.364585 | 0.282246  | -0.44019 | 0.396087 |
| ATZG35610 | XEG113    | 193.7913 | 160.5821 | 202.1617 | 230.5403 | 187.4782 | 264.1628 | 183.1965 | 226.5669 | 143.5082 | 158.3234 | 110.4177 | 164.7091  | 0.275959 | 0.266523 | -0.01537 | 0.962287  | -0.34571 | 0.366129 |
| ATZG35612 | ATZG35612 | 0        | 0        | 0        | 0        | 0        | 0        | 0        | 0        | 0        | 0        | 0        | 0         | #N/A     | #N/A     | #N/A     | #N/A      | #N/A     | #N/A     |
| ATZG35613 | ATZG35613 | 0        | 0        | 0        | 0        | 0        | 0        | 0        | 0        | 0        | 0        | 0        | 0         | #N/A     | #N/A     | #N/A     | #N/A      | #N/A     | #N/A     |
| ATZG35615 | ATZG35615 | 0        | 0        | 0        | 0        | 0.662467 | 0        | 0        | 0        | 0        | 0        | 0        | 0         | 0.128567 | NA       | 0        | NA        | 0        | NA       |
| ATZG35620 | FEI2      | 321.0041 | 344.3595 | 320.6259 | 195.485  | 195.4278 | 215.3176 | 195.6468 | 193.1213 | 177.6768 | 288.8202 | 337.9048 | 322.1669  | -0.69568 | 2.28E-07 | -0.78531 | 1.6E-08   | -0.05483 | 0.866496 |
| ATZG35630 | MOR1      | 1052.18  | 920.671  | 820.2358 | 538.6147 | 491.5507 | 645.9528 | 713.2214 | 809.1675 | 437.3582 | 992.1598 | 933.8944 | 864.982   | -0.71704 | 0.000603 | -0.49671 | 0.026319  | -0.00119 | 0.99816  |
| ATZG35635 | RUB2      | 499.3397 | 549.5478 | 598.7593 | 810.3166 | 796.9481 | 790.4947 | 616.2873 | 592.3106 | 783.9255 | 647.6865 | 631.9086 | 576.9999  | 0.5351   | 0.000142 | 0.27119  | 0.087767  | 0.170194 | 0.517788 |
| ATZG35637 | ATZG35637 | 2.377808 | 1.784246 | 0        | 0.424616 | 0        | 0        | 1.07889  | 2.928738 | 0        | 1.330334 | 1.035907 | 0         | -0.64391 | 0.29856  | 0.00599  | 0.99395   | -0.25098 | NA       |
| ATZG35640 | ATZG35640 | 1.188904 | 1.784246 | 0        | 0.824831 | 0        | 0        | 3.557214 | 1.07889  | 0.976246 | 3.838143 | 1.330334 | 0         | -0.38419 | 0.582322 | 0.369405 | 0.620272  | 0.311719 | NA       |
| ATZG35650 | CSLA7     | 290.0926 | 265.8527 | 348.8037 | 262.2963 | 205.3649 | 265.1596 | 207.2077 | 195.2791 | 191.3442 | 293.6179 | 344.5565 | 313.8797  | -0.29604 | 0.09169  | -0.59178 | 0.000521  | 0.072886 | 0.850046 |
| ATZG35658 | ATZG35658 | 0        | 3.568492 | 1.287654 | 14.02213 | 19.87402 | 13.95577 | 3.557214 | 3.23667  | 11.71495 | 2.878607 | 3.991002 | 4.143626  | 2.223461 | 6.45E-05 | 1.084536 | 0.092958  | 0.568437 | NA       |
| ATZG35660 | CTF2A     | 177.1467 | 194.4828 | 202.1617 | 162.4917 | 119.9066 | 149.5261 | 172.5249 | 161.8335 | 135.6982 | 235.0862 | 248.7725 | 207.1813  | -0.39492 | 0.038392 | -0.2784  | 0.189983  | 0.26242  | 0.401013 |
| ATZG35670 | FIS2      | 0        | 0        | 0        | 0.824831 | 0        | 0        | 1.07889  | 0.976246 | 0.995936 | 0        | 0        | 0         | 0.151593 | NA       | 0.330179 | NA        | 0.164216 | NA       |
| ATZG35680 | DSP8      | 1166.315 | 1138.349 | 1005.658 | 1012.48  | 947.3282 | 952.9798 | 885.7463 | 937.5554 | 1159.78  | 922.1137 | 975.1348 | 937.4954  | -0.1812  | 0.213039 | -0.14819 | 0.348631  | -0.22127 | 0.30524  |
| ATZG35690 | ACX1.2    | 247.292  | 210.541  | 211.1753 | 137.7468 | 133.8184 | 149.5261 | 163.6318 | 198.5157 | 146.4369 | 199.5834 | 203.5411 | 187.4991  | -0.66485 | 5.73E-05 | -0.39552 | 0.029783  | -0.18181 | 0.563955 |
| ATZG35700 | EROF38    | 10.70014 | 8.92123  | 12.87654 | 8.660727 | 11.92441 | 6.977885 | 6.872338 | 6.47334  | 8.786214 | 10.55489 | 14.63367 | 13.23159  | -0.19726 | 0.739601 | -0.31157 | 0.614207  | 0.045426 | NA       |
| ATZG35710 | PGSIF9    | 23.77808 | 17.84246 | 23.17778 | 16.49662 | 15.89921 | 35.86277 | 16.89677 | 16.18335 | 21.47741 | 23.02886 | 17.29434 | 24.86176  | 0.002483 | 0.996775 | -0.23172 | 0.659161  | 0.005102 | 0.996947 |
| ATZG35720 | ATJ13     | 129.5905 | 114.1917 | 131.3407 | 145.1703 | 116.5942 | 157.5008 | 135.1741 | 118.6779 | 134.7219 | 122.8206 | 97.11438 | 105.6625  | 0.1459   | 0.525584 | 0.045223 | 0.872482  | -0.19815 | 0.602936 |
| ATZG35730 | ATZG35730 | 0        | 0        | 3.862963 | 4.536571 | 3.974804 | 4.984204 | 6.225124 | 3.23667  | 3.904984 | 0        | 0        | 1.035907  | 0.934688 | 0.160642 | 0.907134 | 0.196509  | -0.48482 | NA       |
| ATZG35733 | ATZG35733 | 1.188904 | 0        | 1.287654 | 1.237427 | 1.324935 | 1.993682 | 1.778607 | 1.07889  | 0.976246 | 0        | 1.330334 | 0         | 0.29505  | 0.690703 | 0.18726  | 0.817186  | -0.27607 | NA       |
| ATZG35736 | ATZG35736 | 11.88904 | 12.48972 | 23.17778 | 35.46774 | 33.78583 | 28.90838 | 21.34328 | 23.73558 | 22.45366 | 23.02886 | 23.94601 | 15.5386   | 0.947389 | 0.010316 | 0.427287 | 0.345113  | 0.321824 | 0.672536 |
| ATZG35738 | ATZG35738 | 2.377808 | 0        | 6.438272 | 7.31174  | 3.312336 | 0        | 2.66791  | 4.31556  | 1.952492 | 7.676285 | 7.982004 | 5.179533  | -0.18806 | 0.813382 | -0.05692 | 0.948902  | 0.749382 | NA       |
| ATZG35740 | INT3      | 23.77808 | 19.62671 | 18.02716 | 17.32145 | 20.53649 | 16.94629 | 13.33995 | 16.18335 | 16.18335 | 10.70514 | 21.28534 | 24.86176  | -0.15549 | 0.738458 | -0.40861 | 0.374683  | 0.302653 | 0.678446 |
| ATZG35742 | ATZG35742 | 2.377808 | 0        | 1.287654 | 2.474493 | 3.312336 | 7.94726  | 3.57214  | 1.07889  | 3.904984 | 1.919071 | 0        | 4.143626  | 0.854642 | 0.206918 | 0.473114 | 0.540818  | 0.240918 | NA       |
| ATZG35743 | ATZG35743 | 1.188904 | 0        | 2.575309 | 2.474493 | 1.324935 | 1.993682 | 0.889303 | 1.07889  | 0.976246 | 1.919071 | 0        | 3.10772   | 0.258016 | 0.742528 | -0.17364 | 0.837928  | 0.159095 | NA       |
| ATZG35744 | ATZG35744 | 21.40027 | 24.97944 | 23.17778 | 21.85803 | 23.84882 | 20.93366 | 24.01119 | 24.81447 | 17.57243 | 31.66468 | 35.91902 | 12.43088  | -0.04708 | 0.928432 | -0.05434 | 0.92197   | 0.175041 | 0.842398 |
| ATZG35747 | ATZG35747 | 0        | 0        | 0        | 0        | 0        | 0        | 0        | 0        | 0        | 0        | 0        | 0         | #N/A     | #N/A     | #N/A     | #N/A      | #N/A     | #N/A     |
| ATZG35750 | ATZG35750 | 22.58917 | 12.48972 | 18.02716 | 19.79595 | 15.23675 | 22.92734 | 22.23259 | 25.89336 | 21.47741 | 20.15025 | 19.95501 | 21.75404  | 0.064422 | 0.898798 | 0.31566  | 0.497095  | 0.164946 | 0.852376 |
| ATZG35760 | ATZG35760 | 48.74506 | 67.80135 | 70.82099 | 72.99756 | 63.59686 | 41.86731 | 38.24005 | 29.13003 | 36.1211  | 54.69353 | 51.88302 | 43.50807  | -0.02813 | 0.942639 | -0.78968 | 0.010145  | -0.29342 | 0.587313 |
| ATZG35765 | ATZG35765 | 0        | 0        | 0        | 0        | 0        | 0        | 0        | 0        | 0.976246 | 0        | 0        | 0         | 0.134977 | NA       | 0        | NA        | 0.415583 | NA       |
| ATZG35770 | SCPL28    | 0        | 0        | 1.287654 | 3.299325 | 0.662467 | 0.996841 | 0.889303 | 1.07889  | 1.952492 | 0.995936 | 0        | 0.2071813 | 0.575028 | 0.395781 | 0.3603   | 0.629573  | 0.253346 | NA       |
| ATZG35780 | SCPL26    | 668.164  | 685.1505 | 638.6766 | 473.0407 | 477.6389 | 449.5752 | 414.5154 | 447.7393 | 422.7145 | 704.2992 | 605.302  | 647.4416  | -0.50074 | 7.02E-06 | -0.62653 | 0.827E-08 | -0.0213  | 0.94456  |
| ATZG35790 | ATZG35790 | 20.92448 | 17.84246 | 20.73123 | 218.5803 | 257.6998 | 208.3397 | 152.9602 | 161.8335 | 258.7052 | 144.8899 | 166.2917 | 158.4937  | 0.214507 | 0.376669 | -0.03548 | 0.903438  | -0.31655 | 0.39034  |
| ATZG35795 | TIM14.1   | 91.5456  | 71.36984 | 93.99877 | 134.8599 | 141.768  | 85.72831 | 104.9378 | 72.28563 | 120.0783 | 110.3466 | 89.13238 | 108.7702  | 0.47737  | 0.077569 | 0.193937 | 0.554378  | 0.244844 | 0.623367 |
| ATZG35800 | ATZG35800 | 67.67552 | 626.2704 | 584.5951 | 325.8083 | 312.6846 | 325.9669 | 303.2525 | 388.4004 | 345.5911 | 550.7734 | 562.7313 | 491.0197  | -0.95835 | 8.3E-14  | -0.85704 | 7.34E-11  | -0.23391 | 0.285592 |
| ATZG35810 | ATZG35810 | 156.9353 | 181.9931 | 157.0938 | 239.201  | 254.3874 | 191.3934 | 167.1891 | 165.0702 | 178.653  | 168.8783 | 147.6671 | 187.4991  | 0.471917 | 0.008236 | 0.048596 | 0.849768  | 0.034315 | 0.943411 |
| ATZG35820 | ATZG35820 | 11.88904 | 137.3869 | 155.8062 | 157.1303 | 131.1685 | 118.6241 | 129.8383 | 131.6246 | 164.0003 | 121.861  | 139.6851 | 133.6319  | -0.00427 | 0.99316  | 0.046841 | 0.807116  | -0.06027 | 0.901923 |
| ATZG35830 | ATZG35830 | 463.6725 | 565.606  | 583.3074 | 442.9343 | 453.7901 | 315.0017 | 477.556  | 427.2404 | 525.5522 | 612.1837 | 63       |           |          |          |          |           |          |          |

|           |           |          |          |          |          |          |          |          |          |          |          |          |          |           |          |          |          |           |          |
|-----------|-----------|----------|----------|----------|----------|----------|----------|----------|----------|----------|----------|----------|----------|-----------|----------|----------|----------|-----------|----------|
| ATZG36300 | ATZG36300 | 155.7464 | 178.4246 | 207.3123 | 320.8593 | 341.8331 | 270.1439 | 221.4366 | 227.6458 | 295.8025 | 167.9187 | 224.8264 | 159.5296 | 0.768694  | 8.66E-05 | 0.447803 | 0.039327 | 0.02087   | 0.971473 |
| ATZG36305 | FACE2     | 45.17835 | 48.17464 | 50.21852 | 44.9533  | 67.57166 | 53.8294  | 50.6093  | 34.52448 | 38.07359 | 22.06932 | 19.95501 | 21.75404 | 0.200364  | 0.554318 | -0.19654 | 0.602589 | -0.17209  | 0.007611 |
| ATZG36307 | ZPR4      | 20.1137  | 5.352738 | 16.73951 | 19.38353 | 17.88662 | 19.93682 | 20.45938 | 9.710009 | 18.54867 | 21.10978 | 21.28534 | 27.96948 | 0.315983  | 0.513066 | 0.125651 | 0.831565 | 0.586443  | 0.005675 |
| ATZG36310 | URH1      | 317.4374 | 353.2807 | 334.7901 | 345.1918 | 268.2992 | 352.8816 | 325.4851 | 295.6158 | 323.1374 | 343.5138 | 275.3791 | 313.8797 | -0.05462  | 0.790504 | -0.08543 | 0.68488  | -0.0996   | 0.770425 |
| ATZG36320 | SAP4      | 735.9315 | 760.0888 | 768.7296 | 878.8576 | 861.2075 | 757.599  | 834.1667 | 845.8497 | 1141.232 | 698.5419 | 699.7557 | 620.508  | 0.1413    | 0.419731 | 0.31256  | 0.055671 | -0.1635   | 0.561641 |
| ATZG36325 | ATZG36325 | 0        | 0        | 0        | 0.412416 | 0        | 1.324935 | 2.990522 | 3.574212 | 0        | 1.952492 | 1.919071 | 0        | 0.627937  | 0.314413 | 0.762162 | 0.225475 | 0.291821  | NA       |
| ATZG36330 | ATZG36330 | 115.3237 | 101.702  | 126.1901 | 142.2834 | 145.7428 | 144.5419 | 111.1629 | 126.2301 | 125.9545 | 135.2945 | 134.3637 | 96.33931 | 0.317173  | 0.122451 | 0.050402 | 0.857288 | -0.078645 | 0.866158 |
| ATZG36340 | ATZG36340 | 99.86793 | 96.34929 | 78.54691 | 82.80841 | 84.58159 | 69.77885 | 81.81592 | 84.15342 | 121.0357 | 83.4796  | 85.14137 | 104.6266 | -0.19302  | 0.487643 | 0.086174 | 0.783251 | -0.00399  | 0.959545 |
| ATZG36350 | ATZG36350 | 330.5153 | 248.0102 | 221.4765 | 105.9908 | 109.9696 | 107.6588 | 121.8346 | 114.3623 | 91.76712 | 272.5081 | 308.6375 | 248.6176 | -1.27797  | 3.49E-12 | -1.2556  | 3.37E-11 | 0.044699  | 0.92594  |
| ATZG36355 | ATZG36355 | 5.94452  | 3.568492 | 6.438272 | 2.062078 | 5.299738 | 3.987363 | 3.557214 | 3.23667  | 11.71495 | 14.39303 | 11.97301 | 15.5386  | -0.43951  | 0.505386 | 0.12104  | 0.879013 | 1.064344  | NA       |
| ATZG36360 | ATZG36360 | 168.8244 | 173.0719 | 146.7926 | 234.252  | 217.9517 | 240.2386 | 154.7388 | 188.8057 | 151.3181 | 143.9303 | 114.4087 | 162.6373 | 0.495523  | 0.005934 | 0.017831 | 0.946796 | -0.19848  | 0.5675   |
| ATZG36370 | FBL11     | 68.95643 | 89.2123  | 72.10864 | 74.64722 | 70.884   | 73.76622 | 91.59826 | 79.83786 | 66.38473 | 96.9131  | 83.81104 | 88.05205 | -0.05305  | 0.856077 | 0.062588 | 0.843652 | 0.235412  | 0.571787 |
| ATZG36380 | ABC34     | 221.1361 | 255.1472 | 230.4901 | 291.5778 | 236.5008 | 407.7079 | 503.3458 | 621.4406 | 300.6838 | 215.8955 | 256.7545 | 225.8276 | 0.383703  | 0.171429 | 0.968685 | 0.000135 | -0.01627  | 0.98358  |
| ATZG36390 | SBE2.1    | 715.7202 | 813.6162 | 851.1395 | 912.6757 | 820.1345 | 988.8661 | 1394.428 | 1529.866 | 1142.208 | 1034.379 | 1106.838 | 1012.081 | 0.19005   | 0.242047 | 0.762406 | 5.49E-08 | 0.400108  | 0.044048 |
| ATZG36400 | GRF3      | 177.1467 | 167.7191 | 155.8062 | 212.8064 | 208.0147 | 239.2418 | 176.9714 | 185.5691 | 149.8668 | 146.809  | 166.2917 | 147.0987 | 0.385786  | 0.017226 | 0.085342 | 0.692245 | -0.12534  | 0.71153  |
| ATZG36402 | ATZG36402 | 0        | 0        | 0        | 0        | 0        | 0        | 0.889303 | 0        | 0        | 0        | 0        | 0        | 0         | 0        | 0        | 0        | 0         | 0        |
| ATZG36410 | ATZG36410 | 249.6698 | 335.4383 | 260.1062 | 390.5575 | 406.0924 | 422.6605 | 385.9577 | 413.2148 | 667.7523 | 280.1844 | 263.4061 | 319.0592 | 0.516696  | 0.01945  | 0.77641  | 0.003311 | 0.035049  | 0.952456 |
| ATZG36420 | ATZG36420 | 97.49012 | 83.85956 | 88.84815 | 131.973  | 106.6572 | 95.69671 | 75.5908  | 115.4412 | 171.8193 | 89.23681 | 86.47171 | 100.4829 | 0.2966174 | 0.339103 | 0.369995 | 0.207423 | 0.026843  | 0.972955 |
| ATZG36430 | ATZG36430 | 194.9802 | 249.7944 | 222.7642 | 101.0418 | 97.38269 | 110.6493 | 141.7201 | 162.9124 | 130.817  | 204.3811 | 204.8714 | 180.2477 | -1.08436  | 5.54E-10 | -0.69601 | 0.000186 | -0.1687   | 0.626348 |
| ATZG36440 | ATZG36440 | 0        | 0        | 0        | 1.237247 | 0        | 0.662467 | 0.996841 | 0        | 0.928738 | 0        | 0        | 0        | 0.486857  | NA       | 0.495901 | NA       | 0         | NA       |
| ATZG36450 | ERF024    | 0        | 0        | 0        | 0        | 0        | 0        | 0        | 0        | 0        | 0        | 0        | 0        | #N/A      | #N/A     | #N/A     | #N/A     | #N/A      | #N/A     |
| ATZG36460 | ATZG36460 | 974.9012 | 1029.51  | 955.4395 | 1147.753 | 1277.237 | 1134.405 | 1249.471 | 1168.438 | 1801.174 | 933.6282 | 955.1798 | 870.1615 | 0.261993  | 0.144919 | 0.50289  | 0.003097 | -0.09923  | 0.781222 |
| ATZG36470 | ATZG36470 | 84.41218 | 90.99655 | 78.54691 | 142.6958 | 146.4053 | 139.5577 | 182.3072 | 147.8079 | 184.5105 | 61.41028 | 71.83803 | 54.90305 | 0.743955  | 0.000114 | 1.003443 | 1.49E-07 | -0.42163  | 0.214384 |
| ATZG36480 | ATZG36480 | 250.8587 | 201.6198 | 181.5593 | 124.9619 | 144.4179 | 140.5545 | 146.7351 | 180.1746 | 114.2208 | 170.7973 | 156.9794 | 168.8258 | -0.62077  | 0.001879 | -0.51557 | 0.01522  | -0.34447  | 0.289901 |
| ATZG36485 | ATZG36485 | 19.02246 | 24.97944 | 28.3284  | 28.04426 | 26.49869 | 18.93997 | 16.89677 | 22.65669 | 24.40615 | 24.94793 | 22.61568 | 31.0772  | 0.056643  | 0.905029 | -0.16025 | 0.743158 | 0.124666  | 0.882392 |
| ATZG36490 | ROS1      | 770.4098 | 708.3457 | 646.4025 | 327.8704 | 287.5108 | 396.7426 | 420.6405 | 435.8715 | 291.8976 | 555.5711 | 533.4639 | 538.6714 | -1.05241  | 5.64E-10 | -0.86959 | 5.75E-07 | -0.37662  | 1.159404 |
| ATZG36500 | CBS8PSB2  | 21.40027 | 24.97944 | 23.17778 | 27.63184 | 33.12336 | 35.88627 | 37.35075 | 28.05114 | 29.28738 | 25.90746 | 9.312338 | 19.68222 | 0.428245  | 0.268698 | 0.419827 | 0.315665 | -0.26173  | 0.734531 |
| ATZG36510 | ATZG36510 | 0        | 0        | 0        | 0        | 0        | 0        | 0        | 0        | 0        | 0        | 0        | 0        | #N/A      | #N/A     | #N/A     | #N/A     | #N/A      | #N/A     |
| ATZG36520 | ATZG36520 | 0        | 0        | 0        | 0        | 0        | 0        | 0        | 0        | 0        | 0        | 0        | 0        | #N/A      | #N/A     | #N/A     | #N/A     | #N/A      | #N/A     |
| ATZG36530 | ENO2      | 3294.453 | 3140.273 | 3220.424 | 3331.081 | 3625.683 | 3375.303 | 2947.152 | 3123.386 | 3774.167 | 3067.635 | 2672.641 | 3072.499 | 0.096531  | 0.511315 | 0.027471 | 0.876677 | -0.13007  | 0.570796 |
| ATZG36540 | ATZG36540 | 2.377808 | 0        | 6.438272 | 2.474493 | 1.987402 | 2.990522 | 2.66791  | 3.23667  | 1.952492 | 2.878607 | 2.660668 | 5.179533 | -0.21005  | 0.791165 | -0.1475  | 0.865715 | 0.130015  | NA       |
| ATZG36550 | ATZG36550 | 0        | 0        | 1.287654 | 0        | 0        | 0        | 0        | 0        | 0        | 0        | 0        | 0        | -0.2184   | NA       | -0.20558 | NA       | -0.19918  | NA       |
| ATZG36560 | ATZG36560 | 0        | 0        | 0        | 1.324935 | 0        | 0        | 0        | 0        | 0        | 0        | 0        | 0        | 0.183593  | NA       | 0        | 0        | 0         | 0        |
| ATZG36570 | PXC1      | 430.3832 | 181.9931 | 206.0247 | 79.59621 | 73.53387 | 65.79149 | 69.36567 | 87.39009 | 93.71962 | 227.4099 | 184.9164 | 217.5404 | -1.79878  | 1.86E-11 | -1.62206 | 2.88E-09 | -0.36389  | 0.456482 |
| ATZG36571 | ATZG36571 | 0        | 0        | 0        | 0        | 0        | 0        | 0        | 0        | 0        | 0        | 0        | 0        | #N/A      | #N/A     | #N/A     | #N/A     | #N/A      | #N/A     |
| ATZG36580 | ATZG36580 | 426.8165 | 371.1232 | 355.3926 | 496.5484 | 528.6489 | 547.2656 | 546.0323 | 589.0739 | 416.857  | 358.8663 | 271.3881 | 285.9102 | 0.435325  | 0.013252 | 0.417589 | 0.022528 | -0.32329  | 0.244959 |
| ATZG36590 | PROT3     | 28.53369 | 33.90067 | 16.73951 | 26.80701 | 17.22415 | 19.93682 | 32.90423 | 23.73558 | 19.52492 | 26.867   | 27.93701 | 47.6517  | -0.24133  | 0.596986 | -0.02692 | 0.961461 | 0.359823  | 0.612836 |
| ATZG36600 | ATZG36600 | 0        | 0        | 0        | 0        | 0        | 0        | 0        | 0        | 0        | 0        | 0        | 0        | #N/A      | #N/A     | #N/A     | #N/A     | #N/A      | #N/A     |
| ATZG36610 | A7H-22    | 1.188904 | 0        | 0        | 3.299325 | 1.987402 | 1.993682 | 0.889303 | 2.15778  | 0.976246 | 0.959536 | 1.330334 | 2.071813 | 0.866674  | 0.191133 | 0.370364 | 0.632583 | 0.429587  | NA       |
| ATZG36620 | RPL24A    | 822.7215 | 965.2771 | 1018.535 | 1175.384 | 1099.696 | 917.0935 | 695.4353 | 678.6218 | 1056.298 | 945.1426 | 752.969  | 1161.251 | 0.182018  | 0.462331 | -0.20082 | 0.435708 | 0.027701  | 0.961629 |
| ATZG36630 | ATZG36630 | 470.806  | 467.4725 | 468.7062 | 440.8722 | 478.3014 | 441.6005 | 418.8619 | 327.9825 | 205.0117 | 409.7217 | 391.1182 | 418.5062 | -0.04654  | 0.686178 | -0.04598 | 0.012254 | -0.20004  | 0.610726 |
| ATZG36632 | ATZG36632 | 0        | 0        | 0        | 0        | 0        | 0        | 0        | 0        | 0        | 0        | 0        | 0        | #N/A      | #N/A     | #N/A     | #N/A     | #N/A      | #N/A     |
| ATZG36640 | ATECP63   | 1.188904 | 0        | 0        | 0.824831 | 0        | 1.993682 | 0        | 0        | 0        | 0        | 0        | 0        | 0.255864  | NA       | -0.23343 | NA       | -0.2236   | NA       |
| ATZG36650 | ATZG36650 | 7.133424 | 7.136984 | 3.862963 | 2.886909 | 6.624673 | 6.977885 | 5.335821 | 6.47334  | 12.6912  | 12.47396 | 3.991002 | 5.179533 | -0.15197  | 0.835843 | 0.325499 | 0.652885 | 0.217828  | NA       |
| ATZG36660 | PAB7      | 11.88904 | 8.92123  | 9.01358  | 5.773818 | 9.92205  | 1.993682 | 4.446517 | 5.39445  | 4.88123  | 17.27164 | 15.96401 | 18.66432 | -0.8351   | 0.113942 | -0.8012  | 0.165298 | 0.693358  | NA       |
| ATZG36670 | ATZG36670 | 126.0238 | 103.4863 | 133.9161 | 186.8243 | 190.1281 | 167.4693 | 196.5361 | 194.2002 | 166.9381 | 73.88424 | 111.7481 | 96.33931 | 0.563548  | 0.003941 | 0.952448 | 0.00228  | -0.37909  | 0.242778 |
| ATZG36680 | VP537-2   | 200.9248 | 194.4828 | 230.4901 | 403.3424 | 394.8305 | 354.8753 | 408.1903 | 352.797  | 359.2585 | 246.6007 | 290.0128 | 281.7666 | 0.868167  | 1.21E-09 | 0.824034 | 1.65E-08 | 0.372377  | 0.094851 |
| ATZG36690 | ATZG36690 | 0        | 0        | 0        | 6.598649 | 3.312336 | 2.990522 | 6.225124 | 4.31556  | 3.904984 | 0.959536 | 1.330334 | 1.035907 | 1.584535  | 0.012714 | 1.588107 | 0.012644 | 0.436286  | NA       |
| ATZG36695 | ATZG36695 | 0        | 0        | 0        | 0.824831 | 0.662467 | 0        | 0        | 0        | 0        | 0        | 0        | 0        | 0.256538  | NA       | 0        | 0        | 0         | 0        |
| ATZG36700 | PME14     | 0        | 0        | 0        | 0        | 0        | 0        | 2.66791  | 0        | 0        | 0        | 0        | 0        | 0         | 0        | 0        | 0        | 0         | 0        |
| ATZG36710 | PME15     | 0        | 0        | 0        | 0.824831 | 0        | 0        | 0        | 0        | 0        | 0        | 0        | 0        | 0.136071  | NA       | 0        | 0        | 0         | 0        |
| ATZG36720 | ATZG36720 | 418.4942 | 381.8287 | 410.7617 | 320.8593 | 315.9969 | 344.9069 | 422.4192 | 347.4026 | 246.014  | 332.9589 | 332.5835 | 366.7109 | -0.29935  | 0.128894 | -0.24818 | 0.24502  | -0.2264   | 0.493509 |
| ATZG36724 | ATZG36724 | 0        | 0        | 0        | 0        | 0        | 0        | 0        | 0        | 0        | 0        | 0        | 0        | #N/A      | #N/A     | #N/A     | #N/A     | #N/A      | #N/A     |
| ATZG36730 | PCMP-E44  | 22.58917 | 35.68492 | 37.34198 | 48.25262 | 46.37271 | 43.86099 | 46.24378 | 53.9445  | 64.43224 | 43.1791  | 39.91002 | 38.32854 | 0.523777  | 0.086638 | 0.751867 | 0.013849 | 0.381155  | 0.540218 |
| ATZG36740 | SWC2      | 147.4241 | 178.4246 | 229.2025 | 235.48   |          |          |          |          |          |          |          |          |           |          |          |          |           |          |

|           |           |           |           |          |          |          |          |          |          |          |          |          |          |          |          |          |          |          |          |
|-----------|-----------|-----------|-----------|----------|----------|----------|----------|----------|----------|----------|----------|----------|----------|----------|----------|----------|----------|----------|----------|
| AT2G37150 | AT2G37150 | 120.0793  | 114.1917  | 106.8753 | 138.984  | 123.2189 | 147.5324 | 164.5211 | 153.2024 | 121.0545 | 107.468  | 106.4267 | 109.8061 | 0.253601 | 0.2287   | 0.354598 | 0.097126 | -0.07413 | 0.875031 |
| AT2G37160 | AT2G37160 | 172.3911  | 151.6609  | 172.5457 | 199.1967 | 141.1055 | 216.3144 | 168.9677 | 167.2279 | 129.6112 | 138.7131 | 91.79304 | 149.1705 | 0.15326  | 0.576107 | -0.10065 | 0.747111 | -0.36945 | 0.336105 |
| AT2G37170 | PIP2-2    | 890.4891  | 868.9278  | 865.3037 | 808.7469 | 737.9885 | 704.7664 | 498.8993 | 555.6283 | 594.5338 | 782.0215 | 607.9626 | 726.1705 | -0.21631 | 0.132406 | -0.66331 | 4.52E-07 | -0.3042  | 0.123406 |
| AT2G37180 | PIP2-3    | 240.1586  | 214.1095  | 230.4901 | 302.713  | 227.8887 | 272.1375 | 160.9639 | 183.4113 | 170.843  | 272.5081 | 223.4961 | 217.5404 | 0.22514  | 0.234032 | -0.40735 | 0.031466 | 0.057801 | 0.889374 |
| AT2G37190 | RP12A     | 377.94    | 1527.315  | 1634.033 | 1817.103 | 2076.172 | 1467.35  | 1354.409 | 1177.069 | 2129.193 | 1705.905 | 1579.106 | 1688.528 | 0.236673 | 0.324637 | 0.037225 | 0.901066 | 0.127992 | 0.773406 |
| AT2G37195 | AT2G37195 | 23.7708   | 21.41095  | 20.60247 | 36.70499 | 33.12336 | 37.87995 | 21.34328 | 31.28781 | 44.90732 | 23.98839 | 19.95501 | 16.5745  | 0.646972 | 0.07839  | 0.506792 | 0.216023 | -0.11064 | 0.920352 |
| AT2G37200 | AT2G37200 | 175.9578  | 130.25    | 206.0247 | 145.1703 | 147.0677 | 133.5767 | 97.4254  | 154.2813 | 189.3917 | 146.809  | 126.3817 | 129.4883 | -0.269   | 0.204208 | 0.067556 | 0.801855 | -0.34731 | 0.274581 |
| AT2G37210 | LOG3      | 3.566712  | 0         | 1.287654 | 5.361402 | 0.937009 | 1.993682 | 6.225124 | 7.55223  | 11.71495 | 1.919071 | 1.330334 | 3.10772  | 0.975885 | 0.128433 | 1.394935 | 0.034479 | -0.87714 | NA       |
| AT2G37220 | CP9B      | 5065.92   | 4910.245  | 4412.791 | 3774.427 | 3228.865 | 3195.872 | 4314.011 | 5170.041 | 5170.041 | 7722.106 | 4582.742 | 4545.751 | 0.48404  | 0.013352 | 0.251701 | 0.255894 | -0.10757 | 0.794002 |
| AT2G37230 | AT2G37230 | 233.0252  | 173.0719  | 195.7235 | 129.9109 | 149.0551 | 152.5166 | 142.2886 | 153.2024 | 180.6055 | 165.9997 | 194.2288 | 184.3914 | 0.48717  | 0.007496 | -0.34066 | 0.089618 | -0.15355 | 0.666652 |
| AT2G37240 | AT2G37240 | 172.3911  | 153.4452  | 177.6963 | 226.0037 | 219.9391 | 147.5324 | 198.3147 | 165.0702 | 208.9166 | 279.2249 | 218.1748 | 253.7971 | 0.176259 | 0.295975 | 0.176259 | 0.487078 | 0.560454 | 0.041138 |
| AT2G37250 | ADK       | 341.2154  | 347.928   | 406.8988 | 488.3    | 527.9864 | 523.3414 | 496.2313 | 482.2638 | 481.2893 | 366.5426 | 300.6555 | 420.5781 | 0.480307 | 0.011157 | 0.406056 | 0.009129 | -0.00759 | 0.987026 |
| AT2G37260 | WRKY44    | 41.61164  | 39.25341  | 48.93086 | 57.73818 | 56.97219 | 63.79781 | 61.36194 | 59.33895 | 52.71728 | 50.55539 | 50.55269 | 59.04667 | 0.423252 | 0.113821 | 0.390652 | 0.182572 | 0.284502 | 0.556992 |
| AT2G37270 | RP55A     | 1055.747  | 1097.311  | 1229.71  | 1164.249 | 1203.041 | 986.8724 | 839.5025 | 830.7453 | 1011.391 | 1170.633 | 1157.391 | 1123.599 | -0.01025 | 0.956111 | -0.33129 | 0.018989 | 0.028633 | 0.933388 |
| AT2G37280 | ABC33     | 29.7226   | 35.68492  | 16.73951 | 14.43455 | 9.937009 | 16.94629 | 19.56468 | 28.05114 | 15.61994 | 23.98839 | 39.91002 | 23.82585 | -0.87621 | 0.030014 | -0.32387 | 0.502806 | 0.089837 | 0.922709 |
| AT2G37290 | AT2G37290 | 4.755616  | 1.784246  | 5.150617 | 2.886909 | 3.974804 | 1.993682 | 7.114428 | 4.31556  | 4.88123  | 5.757214 | 2.660668 | 8.287252 | -0.30646 | 0.673606 | 0.299144 | 0.696501 | 0.336188 | NA       |
| AT2G37300 | AT2G37300 | 64.20081  | 41.03766  | 57.94445 | 85.78244 | 89.43308 | 63.79781 | 63.14055 | 53.9445  | 103.4821 | 53.734   | 66.5167  | 85.98024 | 0.509196 | 0.109079 | 0.391009 | 0.265162 | 0.297056 | 0.604225 |
| AT2G37310 | PCMP-E49  | 43.98945  | 23.1952   | 37.34198 | 44.54088 | 43.72284 | 43.86099 | 56.02612 | 56.10228 | 66.62227 | 43.1791  | 54.54369 | 34.18492 | 0.281832 | 0.388803 | 0.617413 | 0.045196 | 0.264558 | 0.641615 |
| AT2G37320 | PCMP-E50  | 21.40027  | 12.48972  | 23.17778 | 29.28151 | 25.83622 | 35.88627 | 29.34701 | 29.13003 | 37.09735 | 21.10978 | 26.60668 | 21.75404 | 0.562619 | 0.128247 | 0.642649 | 0.09731  | 0.205861 | 0.793159 |
| AT2G37330 | ALS3      | 45.17835  | 51.74313  | 38.62963 | 30.93117 | 24.51129 | 25.91786 | 21.34328 | 15.10446 | 27.33489 | 42.21957 | 35.91902 | 41.43626 | -0.66318 | 0.032294 | -0.9899  | 0.002423 | -0.15081 | 0.823895 |
| AT2G37340 | RSZ23     | 657.4639  | 745.8148  | 733.963  | 824.8311 | 735.3387 | 758.5958 | 614.5087 | 744.4341 | 840.5478 | 719.6517 | 711.7287 | 558.3536 | 0.118075 | 0.530126 | 0.041373 | 0.853346 | -0.10082 | 0.764118 |
| AT2G37360 | ABC62     | 0         | 0         | 0        | 0        | 0.824831 | 0.662467 | 0        | 0        | 2.15778  | 0        | 0        | 1.330334 | 0.257712 | NA       | 0.32082  | NA       | 0.183948 | NA       |
| AT2G37362 | AT2G37362 | 1.188904  | 0         | 0        | 0.412416 | 0.662467 | 0        | 0        | 0        | 1.952492 | 0        | 0        | 1.035907 | -0.03438 | NA       | 0.108499 | NA       | -0.03977 | NA       |
| AT2G37370 | AT2G37370 | 2.377808  | 3.568492  | 0        | 0.824831 | 0.324935 | 0.996841 | 1.778607 | 0        | 1.952492 | 1.919071 | 0        | 0        | -0.92326 | 0.663423 | -0.21129 | 0.795866 | -0.47155 | NA       |
| AT2G37380 | MAKR3     | 36.85602  | 35.68492  | 38.62963 | 22.27044 | 21.9305  | 32.90423 | 20.49891 | 35.14486 | 45.09817 | 43.90102 | 47.6517  | -0.49253 | 0.143407 | -0.2985  | 0.443949 | 0.280435 | 0.637328 | 0.381492 |
| AT2G37390 | NAKR2     | 38.04493  | 26.76369  | 29.61605 | 48.25262 | 49.02258 | 46.85152 | 48.02239 | 35.60337 | 42.95482 | 40.3005  | 46.56169 | 45.57989 | 0.557724 | 0.058909 | 0.381892 | 0.259515 | 0.432368 | 0.381492 |
| AT2G37400 | AT2G37400 | 240.1586  | 228.3835  | 275.558  | 248.6866 | 239.1507 | 227.2797 | 202.7612 | 199.5946 | 313.375  | 187.1094 | 212.8534 | 226.8635 | -0.05595 | 0.829453 | -0.05687 | 0.838038 | -0.24469 | 0.493509 |
| AT2G37410 | TIM17-2   | 471.9949  | 492.4519  | 408.1864 | 520.056  | 485.5885 | 444.591  | 408.1903 | 433.7138 | 504.7192 | 384.7738 | 411.0732 | 437.1526 | 0.084996 | 0.628633 | -0.02495 | 0.904422 | -0.15041 | 0.582485 |
| AT2G37420 | AT2G37420 | 152.1797  | 80.29107  | 110.7383 | 133.2102 | 110.632  | 138.5609 | 153.8495 | 141.3346 | 109.3396 | 113.2252 | 174.2738 | 152.2783 | 0.130709 | 0.674031 | 0.210892 | 0.497559 | 0.319713 | 0.471543 |
| AT2G37430 | ZAT11     | 1.188904  | 3.568492  | 3.862963 | 7.835896 | 10.59948 | 13.95577 | 9.782338 | 17.26224 | 25.33824 | 0.995936 | 5.321336 | 0        | 1.28827  | 0.025286 | 1.884131 | 0.000782 | -0.30614 | NA       |
| AT2G37435 | AT2G37435 | 0         | 0         | 0        | 0        | 0        | 0        | 0        | 0        | 0        | 0.995936 | 0        | 0        | 0        | NA       | 0        | NA       | 0.171512 | NA       |
| AT2G37440 | AT2G37440 | 1.188904  | 0         | 0        | 2.474493 | 6.624673 | 4.984204 | 5.335821 | 3.23667  | 4.88123  | 0        | 0        | 1.035907 | 1.360044 | 0.032042 | 1.30946  | 0.047166 | -0.11914 | NA       |
| AT2G37450 | AT2G37450 | 323.8931  | 353.2807  | 353.3926 | 265.1832 | 264.3244 | 251.2039 | 358.3893 | 343.087  | 246.902  | 368.4617 | 429.6979 | 392.6086 | -0.40582 | 0.104933 | -0.1313  | 0.250609 | 0.188728 | 0.523418 |
| AT2G37460 | AT2G37460 | 350.7267  | 317.5958  | 369.5568 | 292.8151 | 252.4    | 225.286  | 86.26244 | 90.62675 | 81.02842 | 348.3114 | 267.3971 | 281.7666 | -0.41565 | 0.015318 | -1.9634  | 0.76E-30 | -0.20463 | 0.501183 |
| AT2G37470 | AT2G37470 | 312.6817  | 297.9691  | 327.0642 | 411.5907 | 407.4174 | 290.0807 | 267.6803 | 248.1447 | 441.2632 | 435.6292 | 502.8662 | 442.3321 | 0.237115 | 0.348429 | 0.027553 | 0.932533 | 0.537697 | 0.089198 |
| AT2G37478 | CPuORF52  | 0         | 0         | 0        | 0        | 0        | 0        | 0        | 0        | 0        | 0        | 0        | 0        | #N/A     | #N/A     | #N/A     | #N/A     | #N/A     | #N/A     |
| AT2G37480 | AT2G37480 | 0         | 0         | 0        | 0        | 0        | 0        | 0        | 0        | 0        | 0        | 0        | 0        | #N/A     | #N/A     | #N/A     | #N/A     | #N/A     | #N/A     |
| AT2G37500 | AT2G37500 | 321.0041  | 337.2225  | 320.6259 | 286.2164 | 255.0499 | 268.1502 | 289.0236 | 297.7736 | 256.7527 | 411.6408 | 469.6079 | 389.5009 | -0.26581 | 0.074838 | -0.21024 | 0.19941  | 0.370561 | 0.055991 |
| AT2G37510 | AT2G37510 | 13.070794 | 17.136984 | 11.58889 | 22.62866 | 19.87402 | 21.9305  | 13.33955 | 18.34113 | 23.4299  | 17.27164 | 19.95501 | 20.71813 | 0.848126 | 0.044089 | 0.629312 | 0.18609  | 0.695566 | 0.30711  |
| AT2G37520 | AT2G37520 | 330.5153  | 369.3389  | 333.5025 | 308.4868 | 318.6468 | 381.79   | 441.9838 | 516.7883 | 308.4937 | 302.2537 | 284.6915 | 308.7001 | -0.03581 | 0.890232 | 0.288848 | 0.18232  | -0.1979  | 0.584037 |
| AT2G37530 | AT2G37530 | 5.94452   | 1.784246  | 4.150617 | 16.08421 | 11.92441 | 10.96525 | 20.45398 | 15.10446 | 15.61994 | 3.838143 | 0        | 1.43626  | 1.200815 | 0.021981 | 1.512309 | 0.003971 | -0.42612 | NA       |
| AT2G37540 | AT2G37540 | 143.8574  | 219.4623  | 187.9975 | 316.7352 | 340.5082 | 357.8658 | 434.8694 | 448.8182 | 367.0685 | 174.6355 | 162.3007 | 150.2064 | 0.873265 | 2.05E-07 | 1.1719   | 1.49E-12 | -0.16024 | 0.654834 |
| AT2G37550 | AGD7      | 387.5827  | 305.1061  | 307.7494 | 342.7134 | 374.9565 | 309.0206 | 275.6841 | 266.4858 | 356.3298 | 258.1151 | 204.8714 | 299.377  | 0.035373 | 0.890243 | -0.15454 | 0.514422 | -0.38132 | 0.196967 |
| AT2G37555 | AT2G37555 | 2.377808  | 0         | 0        | 0.412416 | 0        | 0        | 1.778607 | 0        | 0.976246 | 0        | 0        | 0        | -0.41315 | 0.521514 | 0.302736 | 0.669828 | 0.198901 | NA       |
| AT2G37560 | ORC2      | 32.10041  | 48.17464  | 38.62963 | 26.80701 | 35.77323 | 27.91154 | 19.56468 | 22.65669 | 18.54867 | 41.26003 | 57.20436 | 31.0772  | -0.34892 | 0.330571 | -0.87146 | 0.104256 | 0.12138  | 0.871042 |
| AT2G37570 | SLT1      | 414.9275  | 410.3766  | 385.0086 | 363.7505 | 368.3318 | 425.651  | 333.4888 | 343.087  | 350.4723 | 373.2594 | 271.3881 | 304.5555 | -0.06728 | 0.722437 | -0.23307 | 0.174768 | -0.33886 | 0.133104 |
| AT2G37580 | ATL33     | 24.96698  | 32.11643  | 20.60247 | 52.37678 | 51.67245 | 29.90522 | 43.57587 | 35.60337 | 53.69533 | 29.7456  | 29.26735 | 23.82585 | 0.771441 | 0.023166 | 0.733941 | 0.04199  | 0.09733  | 0.910125 |
| AT2G37585 | AT2G37585 | 136.724   | 123.113   | 130.0531 | 103.9287 | 95.39529 | 114.6367 | 88.9305  | 91.70564 | 88.83839 | 147.7685 | 133.0334 | 150.2064 | -0.31834 | 0.095712 | -0.52589 | 0.007089 | 0.141382 | 0.697022 |
| AT2G37590 | DOF2.4    | 29.7226   | 32.11643  | 38.62963 | 18.97112 | 23.18635 | 27.91154 | 22.23259 | 22.65669 | 14.64369 | 34.54328 | 22.61568 | 25.89766 | -0.51    | 0.158377 | -0.69047 | 0.070456 | -0.23798 | 0.736164 |
| AT2G37600 | RPL36A    | 20.27741  | 255.1472  | 272.9827 | 269.3074 | 213.3344 | 201.3618 | 194.7575 | 151.0446 | 329.9711 | 256.196  | 286.0218 | 339.7773 | 0.092433 | 0.788076 | -0.11755 | 0.744017 | 0.247332 | 0.625041 |
| AT2G37610 | AT2G37610 | 2.377808  |           |          |          |          |          |          |          |          |          |          |          |          |          |          |          |          |          |

|           |           |          |           |           |          |            |          |          |          |          |          |          |          |           |          |          |          |           |          |
|-----------|-----------|----------|-----------|-----------|----------|------------|----------|----------|----------|----------|----------|----------|----------|-----------|----------|----------|----------|-----------|----------|
| ATZG38130 | MAK3      | 121.2682 | 148.0924  | 155.8062  | 275.906  | 233.1885   | 178.4345 | 174.3035 | 185.5691 | 210.8691 | 125.6992 | 142.3457 | 167.8169 | 0.687999  | 0.001006 | 0.414789 | 0.075572 | 0.037362  | 0.949258 |
| ATZG38140 | RPS31     | 1.04148  | 972.4141  | 1022.398  | 1047.536 | 1015.562   | 675.858  | 779.0299 | 638.7028 | 1248.619 | 1194.622 | 1835.861 | 1110.492 | -0.14072  | 0.662237 | -0.17889 | 0.586919 | 0.026369  | 0.309162 |
| ATZG38150 | ATZG38150 | 1.188904 | 0         | 0         | 0        | 0          | 1.987402 | 0        | 0.889303 | 1.07889  | 0.976246 | 0.99536  | 0        | 0.106425  | NA       | 0.249336 | NA       | -0.45511  | NA       |
| ATZG38152 | ATZG38152 | 0        | 1.784246  | 1.287654  | 2.474493 | 1.987402   | 2.990522 | 2.66791  | 3.23667  | 0.976246 | 2.878607 | 2.660668 | 3.10772  | 0.553578  | 0.442256 | 0.485017 | 0.528009 | 0.677733  | NA       |
| ATZG38160 | ATZG38160 | 24.96698 | 14.27397  | 32.19136  | 43.71605 | 31.79843   | 17.94313 | 37.35075 | 32.3667  | 18.54867 | 36.46235 | 41.24035 | 35.22082 | 0.352659  | 0.426123 | 0.24294  | 0.629487 | 0.588041  | 0.392441 |
| ATZG38170 | CAX1      | 3088.772 | 3768.328  | 3184.369  | 1962.686 | 1857.558   | 1854.124 | 1841.748 | 1945.239 | 1728.932 | 2256.828 | 2084.633 | 2443.704 | -0.82459  | 0.356123 | -0.85518 | 2.57E-14 | -0.55848  | 2.89E-05 |
| ATZG38180 | ATZG38180 | 123.646  | 165.9249  | 148.0802  | 143.1082 | 179.5286   | 91.70935 | 73.81219 | 78.75897 | 102.5058 | 129.5373 | 126.3817 | 107.7343 | -0.05736  | 0.862057 | -0.73782 | 0.00515  | -0.24976  | 0.579277 |
| ATZG38185 | ATZG38185 | 46.36725 | 42.9319   | 55.36194  | 44.54088 | 51.00998   | 50.83888 | 63.14025 | 42.07671 | 32.21612 | 54.69353 | 50.55269 | 51.79533 | -0.001506 | 0.99751  | -0.06831 | 0.868241 | 0.107789  | 0.874304 |
| ATZG38195 | ATZG38195 | 0        | 0         | 0         | 0        | 0          | 0        | 1.778607 | 0        | 0        | 0        | 0        | 0        | 0         | NA       | 0        | NA       | 0         | NA       |
| ATZG38210 | PDX114    | 135.535  | 173.0719  | 127.4778  | 86.19486 | 80.15854   | 90.71251 | 110.2736 | 139.1768 | 209.8929 | 156.4043 | 122.3907 | 103.5907 | -0.72347  | 0.005135 | 0.07884  | 0.823152 | -0.1709   | 0.748154 |
| ATZG38220 | ATZG38220 | 0        | 0         | 0         | 0.662467 | 0          | 0.889303 | 3.23667  | 0        | 0        | 0        | 0        | 1.035907 | 0.067745  | NA       | 0.605577 | NA       | 0.164045  | NA       |
| ATZG38230 | PDX11     | 1278.072 | 1331.048  | 1183.354  | 878.8576 | 895.6558   | 1010.797 | 1540.274 | 1852.454 | 2443.544 | 1408.598 | 1509.929 | 1072.163 | -0.43561  | 0.023893 | 0.680811 | 0.001258 | 0.071622  | 0.86931  |
| ATZG38240 | ATZG38240 | 1.188904 | 0         | 2.575309  | 30.51875 | 30.47349   | 68.78201 | 85.37313 | 69.04896 | 67.36097 | 6.716749 | 17.29434 | 7.251346 | 3.207905  | 8.5E-12  | 3.948979 | 1.54E-17 | 1.401932  | 0.051388 |
| ATZG38250 | GT-3B     | 7.133424 | 3.568492  | 7.725926  | 44.12847 | 51.67245   | 43.86099 | 59.58333 | 59.33895 | 71.26596 | 8.635821 | 6.65167  | 7.251346 | 2.461132  | 6.03E-11 | 2.883239 | 1.21E-14 | 0.131104  | 0.906639 |
| ATZG38255 | ATZG38255 | 5.94452  | 3.568492  | 6.438272  | 2.886099 | 5.299738   | 6.977885 | 8.003731 | 7.55223  | 4.88123  | 4.976778 | 5.321336 | 5.179533 | -0.14871  | 0.838488 | 0.245084 | 0.743158 | -0.0717   | NA       |
| ATZG38260 | ATZG38260 | 206.8693 | 164.1506  | 235.6407  | 183.5249 | 183.5034   | 183.4187 | 192.0896 | 181.2535 | 155.2231 | 177.5141 | 151.6581 | 206.1454 | -0.14672  | 0.496336 | -0.20324 | 0.359249 | -0.18069  | 0.607892 |
| ATZG38270 | GRX516    | 671.7307 | 363.6916  | 685.0321  | 627.2841 | 737.3261   | 611.0634 | 815.4913 | 717.4618 | 951.8398 | 768.588  | 810.1734 | 756.2119 | -0.01244  | 0.950326 | 0.314083 | 0.038178 | 0.224188  | 0.335661 |
| ATZG38280 | AMPD      | 77.9308  | 369.3389  | 365.6938  | 311.7862 | 310.0347   | 386.7742 | 406.4117 | 412.136  | 305.565  | 304.1728 | 254.0938 | 382.2495 | -0.13454  | 0.547682 | 0.022903 | 0.933143 | -0.22457  | 0.509742 |
| ATZG38290 | AMT2      | 112.9459 | 98.13353  | 97.86173  | 284.5667 | 255.7124   | 265.1596 | 230.2296 | 261.0914 | 298.7313 | 80.60099 | 50.55269 | 63.1903  | 1.346946  | 1.06E-13 | 1.31567  | 8.77E-13 | -0.63138  | 0.028479 |
| ATZG38300 | ATZG38300 | 38.04493 | 57.09587  | 65.67037  | 34.64291 | 31.79843   | 26.9147  | 48.02239 | 39.91893 | 38.07359 | 58.63167 | 49.22236 | 53.86714 | -0.7119   | 0.013009 | -0.31818 | 0.346025 | 0.024056  | 0.976518 |
| ATZG38304 | ATZG38304 | 1.188904 | 0         | 0         | 0        | 0          | 0        | 0        | 0        | 0        | 0        | 0        | 0        | -0.2184   | NA       | -0.20558 | NA       | -0.19918  | NA       |
| ATZG38310 | PYL4      | 242.5364 | 194.4828  | 166.1074  | 367.0499 | 365.6819   | 327.9606 | 210.7649 | 222.2513 | 303.6125 | 142.9708 | 141.0154 | 187.4991 | 0.792197  | 6.59E-05 | 0.276735 | 0.245973 | -0.34525  | 0.314594 |
| ATZG38320 | TBL34     | 23.77808 | 30.33218  | 15.45185  | 14.43455 | 16.56168   | 12.95893 | 13.33955 | 6.47334  | 8.786214 | 18.23118 | 38.57969 | 15.5386  | -0.54953  | 0.235053 | -1.04802 | 0.025518 | 0.046544  | 0.968315 |
| ATZG38325 | MRX90A    | 0        | 0         | 0         | 0.412416 | 0          | 0        | 0        | 0        | 0        | 0        | 0        | 0        | 0.095918  | NA       | 0        | NA       | 0         | NA       |
| ATZG38330 | DTX44     | 425.6276 | 442.493   | 497.0346  | 364.9878 | 321.9591   | 352.8816 | 522.0211 | 457.4493 | 417.8333 | 525.8255 | 569.3829 | 440.2603 | -0.38642  | 0.013563 | 0.033603 | 0.878466 | 0.164565  | 0.561641 |
| ATZG38340 | DREB2E    | 3.566712 | 1.784246  | 1.287654  | 2.200836 | 17.22415   | 23.92418 | 40.01866 | 42.07671 | 59.55101 | 3.88143  | 6.65167  | 3.10772  | 2.2076    | 3.57E-06 | 3.342986 | 2.76E-13 | 0.416061  | 0.702755 |
| ATZG38350 | ATZG38350 | 0        | 0         | 0         | 1.237247 | 0          | 1.324935 | 0        | 0.889303 | 1.07889  | 0        | 0        | 0        | 0.492017  | NA       | 0.331678 | NA       | 0         | NA       |
| ATZG38360 | PR4184    | 117.7015 | 87.42806  | 105.5877  | 110.115  | 133.1559   | 96.69356 | 88.93035 | 113.2834 | 139.6032 | 100.7512 | 114.4087 | 75.62118 | 0.119956  | 0.689401 | 0.120209 | 0.709838 | -0.10775  | 0.850178 |
| ATZG38365 | ATZG38365 | 0        | 0         | 0         | 0.412416 | 0          | 0        | 0        | 0        | 0        | 1.919701 | 0        | 0        | 0.060903  | NA       | 0        | NA       | 0.281656  | NA       |
| ATZG38370 | ATZG38370 | 122.4571 | 119.5445  | 109.4506  | 117.5384 | 149.7176   | 108.6556 | 145.8458 | 134.8612 | 205.9879 | 93.07496 | 107.7571 | 110.842  | 0.097407  | 0.729768 | 0.45643  | 0.056922 | -0.1695   | 0.71428  |
| ATZG38380 | PER22     | 11.88904 | 12.48972  | 18.02716  | 41.24156 | 35.11077   | 39.87363 | 27.56841 | 23.73558 | 29.28738 | 15.35257 | 15.96401 | 16.5745  | 1.321866  | 0.000156 | 0.818191 | 0.039624 | 0.13316   | 0.885735 |
| ATZG38390 | PER23     | 5.94452  | 3.568492  | 5.150617  | 56.91335 | 51.67245   | 38.87679 | 11.56805 | 10.7889  | 9.76246  | 3.88143  | 2.660668 | 7.251346 | 2.844117  | 2.62E-11 | 0.797811 | 0.144378 | -0.10498  | 0.937455 |
| ATZG38400 | AGT3      | 178.3356 | 199.8356  | 156.6961  | 269.7198 | 283.536    | 329.733  | 409.9689 | 460.686  | 452.0019 | 240.8434 | 224.8264 | 200.9659 | 0.693233  | 7.4E-06  | 1.28381  | 4.74E-18 | -0.311089 | 0.226969 |
| ATZG38410 | ATZG38410 | 203.3026 | 183.7773  | 175.6291  | 199.1967 | 182.1785   | 190.3966 | 201.8719 | 194.2002 | 209.8929 | 158.3234 | 156.9794 | 142.9551 | 0.034137  | 0.86925  | 0.104137 | 0.565275 | -0.28032  | 0.278963 |
| ATZG38420 | ATZG38420 | 79.65656 | 60.66437  | 68.24568  | 77.94654 | 94.73282   | 63.79781 | 78.25871 | 67.97007 | 83.95716 | 60.45074 | 78.4897  | 68.36983 | 0.173113  | 0.541735 | 0.126947 | 0.691883 | -0.02939  | 0.95656  |
| ATZG38430 | ATZG38430 | 27.34479 | 16.05821  | 19.31482  | 15.67179 | 14.57428   | 12.95893 | 8.003731 | 15.10446 | 24.40615 | 23.02886 | 23.94601 | 16.5745  | -0.47946  | 0.294602 | -0.37712 | 0.4613   | -0.00601  | 0.996123 |
| ATZG38440 | SCAR2     | 90.95138 | 881.4117  | 745.75549 | 487.0628 | 353.0951   | 531.3161 | 642.9664 | 684.0162 | 333.8781 | 715.8136 | 683.7917 | 675.4111 | -0.86032  | 0.000246 | -0.59902 | 0.017293 | -0.28996  | 0.948655 |
| ATZG38450 | ATZG38450 | 110.5681 | 112.4075  | 150.6556  | 165.7911 | 196.7528   | 131.583  | 150.2923 | 108.9679 | 234.299  | 135.2945 | 87.80204 | 175.0682 | 0.379727  | 0.251058 | 0.375757 | 0.281176 | 0.08904   | 0.902388 |
| ATZG38460 | IREG1     | 124.8349 | 123.113   | 158.3815  | 70.52306 | 68.23413   | 67.78517 | 88.93035 | 95.25787 | 93.71962 | 175.295  | 174.2738 | 209.2531 | -0.95336  | 3.25E-07 | -0.52105 | 0.010576 | 0.449072  | 0.091202 |
| ATZG38465 | ATZG38465 | 11.88904 | 0.7136984 | 7.725926  | 16.90904 | 17.88662   | 16.94629 | 37.35075 | 45.31338 | 94.6586  | 21.10978 | 34.58868 | 20.71813 | 0.7049    | 0.140551 | 2.308824 | 2.36E-08 | -1.8593   | 0.015699 |
| ATZG38470 | WRKY33    | 267.5034 | 399.6711  | 302.5988  | 1416.235 | 1157.33    | 1879.045 | 2534.515 | 2462.027 | 1741.623 | 203.4126 | 242.1208 | 216.5045 | 2.131406  | 1.62E-25 | 2.712442 | 5.02E-41 | -0.52624  | 0.102621 |
| ATZG38480 | ATZG38480 | 91.5456  | 112.4075  | 139.0667  | 49.48987 | 65.58426   | 49.84204 | 51.5796  | 49.62894 | 51.74104 | 160.2424 | 187.5771 | 120.1652 | -1.01221  | 2.37E-05 | -1.11011 | 8.69E-06 | 0.431037  | 0.25109  |
| ATZG38490 | CPK22     | 3.566712 | 1.736984  | 7.725926  | 11.13522 | 17.22415   | 10.96525 | 15.11816 | 7.55223  | 6.833722 | 1.919071 | 9.312338 | 14.23626 | 0.880657  | 0.135443 | 0.536675 | 0.404612 | -0.22326  | NA       |
| ATZG38500 | ATZG38500 | 16.64466 | 14.27397  | 21.89012  | 27.63184 | 23.18635   | 18.93997 | 19.56468 | 29.13003 | 11.71495 | 26.867   | 27.93701 | 21.78994 | 0.365016  | 0.409806 | 0.142707 | 0.794626 | 0.474412  | 0.499012 |
| ATZG38510 | ATZG38510 | 0        | 0         | 0         | 0        | 0          | 0        | 0        | 0        | 0.976246 | 0        | 0        | 0        | 0         | NA       | 0.16673  | NA       | 0         | NA       |
| ATZG38520 | ATZG38520 | 1.188904 | 5.352738  | 1.287654  | 0        | 0          | 0        | 0        | 0        | 0        | 0        | 0        | 1.035907 | -1.19249  | NA       | -1.11421 | NA       | -0.86483  | NA       |
| ATZG38530 | LTP2      | 26.15589 | 5.352738  | 30.9037   | 165.7911 | 131.1685   | 166.4724 | 77.3694  | 78.75897 | 120.0783 | 30.70514 | 21.28534 | 20.71813 | 2.611648  | 9.87E-18 | 1.895946 | 2.26E-09 | 0.125664  | 0.88141  |
| ATZG38540 | LTP1      | 4192.075 | 4879.913  | 4549.283  | 5509.872 | 4894.308   | 4137.886 | 2655.46  | 2851.506 | 3603.324 | 6742.657 | 7697.312 | 4622.215 | 0.092445  | 0.712812 | -0.56481 | 0.005663 | 0.472259  | 0.094676 |
| ATZG38544 | ATZG38544 | 0        | 0         | 0         | 0        | 0          | 0        | 0        | 0        | 0        | 0        | 0        | 0        | #N/A      | #N/A     | #N/A     | #N/A     | #N/A      | #N/A     |
| ATZG38550 | FAX3      | 300.7927 | 289.0479  | 300.0235  | 396.3314 | 336.5334   | 376.8058 | 445.0871 | 441.2664 | 538.8878 | 315.6872 | 288.6825 | 372.9264 | 0.312675  | 0.061865 | 0.6467   | 3.95E-05 | 0.134074  | 0.676985 |
| ATZG38560 | PHI5      | 284.148  | 265.9314  | 265.2568  | 260.2342 | 265.6494   | 330.9511 | 299.6953 | 330.6414 | 323.1374 | 287.8607 | 275.3791 | 314.9156 | 0.072836  | 0.701673 | 0.202966 | 0.250444 | -0.10958  | 0.697022 |
| ATZG38570 | ATZG38570 | 43.98945 | 39.25341  | 43.78025  | 42.06639 | 35.77323</ |          |          |          |          |          |          |          |           |          |          |          |           |          |

|           |           |          |          |           |           |          |          |           |          |          |          |          |           |          |          |          |          |          |           |
|-----------|-----------|----------|----------|-----------|-----------|----------|----------|-----------|----------|----------|----------|----------|-----------|----------|----------|----------|----------|----------|-----------|
| AT2G39090 | APC7      | 153.3686 | 180.2088 | 148.0802  | 170.74    | 143.0929 | 123.6083 | 135.1741  | 143.4924 | 87.86214 | 166.9592 | 174.2738 | 134.6678  | -0.11766 | 0.668122 | -0.37583 | 0.136223 | -0.01311 | 0.984212  |
| AT2G39100 | AT2G39100 | 78.46766 | 98.13353 | 99.14938  | 145.5827  | 147.0677 | 125.6019 | 158.296   | 148.8868 | 134.7219 | 83.4796  | 78.4897  | 84.9434   | 0.60309  | 0.00175  | 0.672939 | 0.000648 | -0.14378 | 0.739037  |
| AT2G39110 | AT2G39110 | 9.511232 | 8.92123  | 10.30123  | 24.33252  | 17.88662 | 12.95893 | 25.7988   | 15.10446 | 15.52492 | 12.47396 | 14.63367 | 11.39497  | 0.825981 | 0.07055  | 0.907291 | 0.056603 | 0.31905  | NA        |
| AT2G39120 | AT2G39120 | 33.28931 | 28.54794 | 14.1642   | 23.09527  | 29.14856 | 16.94629 | 21.34328  | 17.26224 | 20.50117 | 27.82653 | 23.94601 | 32.1131   | -0.10075 | 0.833565 | -0.31771 | 0.496004 | 0.14112  | 0.870038  |
| AT2G39130 | AT2G39130 | 165.2576 | 146.3082 | 142.9296  | 136.922   | 139.1181 | 135.7053 | 136.6304  | 147.8079 | 104.4583 | 96.9131  | 131.7031 | 126.3806  | -0.14165 | 0.538727 | -0.22566 | 0.336154 | -0.3575  | 0.283475  |
| AT2G39140 | SVR1      | 296.0371 | 324.7328 | 265.2568  | 275.906   | 272.274  | 262.1691 | 394.0567  | 31.0359  | 343.6386 | 282.1035 | 294.0038 | 340.8132  | -0.12008 | 0.509927 | 0.253228 | 0.142389 | 0.054102 | 0.682054  |
| AT2G39160 | AT2G39160 | 0        | 0        | 0         | 0.412416  | 0        | 0        | 0         | 0        | 0        | 0        | 0        | 0         | 0.095918 | NA       | 0        | NA       | 0        | NA        |
| AT2G39170 | AT2G39170 | 115.3237 | 103.4863 | 99.14938  | 150.5317  | 161.642  | 118.6241 | 148.5137  | 115.4412 | 145.4607 | 88.27728 | 119.7301 | 140.8833  | 0.429152 | 0.067117 | 0.35198  | 0.196049 | 0.122303 | 0.806773  |
| AT2G39175 | MIR160A   | 0        | 0        | 0         | 0.412416  | 0.662467 | 0        | 0         | 0        | 0        | 0        | 0        | 0         | 0.196313 | NA       | 0        | NA       | 0        | NA        |
| AT2G39180 | CCR2      | 51.12287 | 46.3904  | 48.93086  | 12.37247  | 18.54908 | 22.92734 | 20.45398  | 31.28781 | 29.28738 | 39.34096 | 39.91002 | 45.57989  | -1.40743 | 0.000004 | -0.80979 | 0.013884 | -0.21744 | 0.726314  |
| AT2G39190 | ATATH8    | 1191.282 | 1231.13  | 1182.067  | 735.7494  | 816.1597 | 864.261  | 1043.153  | 1152.254 | 783.9255 | 1140.888 | 1089.544 | 1069.056  | -0.57018 | 0.000109 | -0.27073 | 0.103131 | -0.12505 | 0.672425  |
| AT2G39200 | ML012     | 3.566712 | 8.92123  | 10.30123  | 62.27475  | 34.4483  | 50.83888 | 41.79726  | 47.47116 | 20.50117 | 6.716749 | 2.660668 | 8.287252  | 2.306472 | 7.26E-08 | 1.898435 | 2.05E-05 | -0.23445 | 0.836955  |
| AT2G39210 | AT2G39210 | 135.535  | 162.3664 | 153.2039  | 697.8072  | 545.2106 | 694.798  | 350.3856  | 372.217  | 274.3251 | 49.89585 | 51.88302 | 78.7289   | 2.056822 | 9.1E-29  | 1.117412 | 9.77E-09 | -1.25344 | 0.326E-07 |
| AT2G39220 | PLP6      | 111.757  | 101.702  | 106.8753  | 126.9912  | 126.5312 | 114.6367 | 96.04478  | 152.1235 | 133.7457 | 118.0229 | 109.0874 | 79.7648   | 0.19169  | 0.462003 | 0.236379 | 0.382629 | -0.06433 | 0.909153  |
| AT2G39230 | LOJ       | 26.15589 | 19.62671 | 18.02716  | 22.27044  | 24.51129 | 18.93997 | 28.45771  | 30.20892 | 13.66744 | 13.4335  | 7.982004 | 15.5386   | 0.042722 | 0.937071 | 0.154147 | 0.773716 | -0.66636 | 0.326542  |
| AT2G39240 | AT2G39240 | 15.45575 | 16.05821 | 9.01358   | 8.660727  | 10.59948 | 8.971567 | 10.67164  | 15.10446 | 11.71495 | 18.23118 | 19.95501 | 15.5386   | -0.44555 | 0.365641 | -0.09149 | 0.883546 | 0.366783 | NA        |
| AT2G39250 | SNZ       | 297.226  | 346.1437 | 385.0086  | 339.418   | 337.8583 | 309.0206 | 385.9577  | 315.0359 | 294.8263 | 387.6524 | 545.4369 | 339.7773  | -0.05611 | 0.82998  | -0.04308 | 0.879519 | 0.296518 | 0.368587  |
| AT2G39260 | UPF2      | 650.3305 | 483.5307 | 383.721   | 398.8059  | 342.4956 | 390.7616 | 433.0908  | 536.2083 | 442.2394 | 418.3575 | 349.8778 | 438.1885  | -0.41379 | 0.042743 | -0.10459 | 0.684548 | -0.32237 | 0.314184  |
| AT2G39270 | AT2G39270 | 166.4466 | 155.2294 | 132.6284  | 265.1832  | 264.2344 | 235.2544 | 187.643   | 166.1491 | 210.8691 | 119.942  | 123.7211 | 134.6768  | 0.742873 | 6.85E-06 | 0.308879 | 0.113641 | -0.25795 | 0.410066  |
| AT2G39280 | AT2G39280 | 342.4043 | 383.6129 | 390.1593  | 288.6909  | 216.6268 | 326.9638 | 257.0087  | 264.328  | 181.5818 | 409.7217 | 385.7969 | 399.8599  | -0.41561 | 0.035052 | -0.64952 | 0.000847 | 0.098793 | 0.812937  |
| AT2G39290 | PGP51     | 20.6006  | 196.2671 | 203.9449  | 183.5249  | 179.5286 | 131.583  | 186.5737  | 162.9124 | 176.7005 | 192.8667 | 171.6131 | 176.1041  | -0.27178 | 0.147032 | -0.19741 | 0.347763 | -0.15896 | 0.646155  |
| AT2G39300 | AT2G39300 | 53.50068 | 28.54794 | 46.35556  | 23.09527  | 23.18635 | 31.8899  | 55.2714   | 37.76115 | 28.31113 | 38.38143 | 41.24035 | 42.47217  | -0.72388 | 0.019561 | -0.34493 | 0.337117 | -0.09716 | 0.894073  |
| AT2G39310 | JAL22     | 17.83356 | 19.62671 | 23.17778  | 41.65397  | 34.4483  | 45.85468 | 43.57587  | 63.65451 | 87.86214 | 23.98839 | 14.63367 | 29.00538  | 0.899647 | 0.013062 | 1.536178 | 8.94E-06 | 0.148426 | 0.866179  |
| AT2G39320 | AT2G39320 | 0        | 0        | 0.1287654 | 0.412416  | 0        | 0        | 0.778607  | 1.10289  | 3.904984 | 0        | 0        | 0.1035907 | -0.25895 | NA       | 0.782293 | NA       | -0.06737 | NA        |
| AT2G39330 | JAL23     | 181.9023 | 123.113  | 163.5321  | 154.6558  | 110.632  | 90.71251 | 109.3843  | 111.1257 | 144.4844 | 332.9589 | 344.5565 | 268.2998  | -0.35616 | 0.141294 | -0.35616 | 0.190158 | 0.9686   | 0.000323  |
| AT2G39340 | AT2G39340 | 739.4883 | 672.6608 | 646.4025  | 41.11783  | 531.7701 | 477.867  | 505.1244  | 573.9694 | 318.2562 | 596.8312 | 589.3379 | 59.6626   | -0.7129  | 0.000459 | -0.54415 | 0.01126  | -0.27243 | 0.447105  |
| AT2G39350 | ABC61     | 27.34479 | 26.76369 | 23.17778  | 65.16166  | 73.53387 | 91.70935 | 90.92796  | 75.4144  | 97.7222  | 821.3625 | 433.6889 | 398.824   | 1.467865 | 8.1E-07  | 0.937171 | 0.004235 | -0.36582 | 0.573823  |
| AT2G39360 | AT2G39360 | 218.7583 | 194.4828 | 178.984   | 173.3897  | 181.516  | 202.3587 | 192.0896  | 194.2002 | 199.1542 | 151.6066 | 176.9344 | 147.0987  | -0.09991 | 0.612489 | -0.01882 | 0.937233 | -0.31911 | 0.225288  |
| AT2G39370 | MAKR4     | 1.188904 | 1.784246 | 1.287654  | 1.237247  | 0        | 0        | 0         | 0        | 0.952492 | 0.995936 | 0        | 0         | -0.8936  | NA       | -0.29065 | NA       | -0.44374 | NA        |
| AT2G39380 | ATEX07H2  | 40.42272 | 51.74313 | 56.65679  | 56.50093  | 59.62205 | 56.81992 | 63.14055  | 48.55005 | 52.71728 | 40.3005  | 41.24035 | 41.43626  | 0.216176 | 0.465551 | 0.150851 | 0.656589 | -0.25444 | 0.622741  |
| AT2G39390 | RPL35B    | 589.6964 | 529.9211 | 727.5247  | 1003.407  | 1020.2   | 715.371  | 835.2607  | 501.6838 | 977.2222 | 821.3625 | 980.4561 | 686.806   | 0.543803 | 0.03914  | 0.118219 | 0.728552 | 0.409143 | 0.312328  |
| AT2G39400 | AT2G39400 | 294.8482 | 435.3569 | 375.9954  | 720.9024  | 737.9885 | 662.8991 | 525.3736  | 754.1441 | 914.7425 | 612.6003 | 433.6889 | 398.824   | 0.193469 | 0.12E-10 | 1.163269 | 1.51E-15 | -0.17484 | 0.550684  |
| AT2G39410 | AT2G39410 | 3.566712 | 1.784246 | 3.862963  | 29.69392  | 42.39791 | 33.89259 | 23.12189  | 18.34113 | 21.47741 | 1.919071 | 0        | 0.1035907 | 2.795185 | 1.21E-09 | 2.082827 | 1.91E-05 | -0.70129 | NA        |
| AT2G39415 | AT2G39415 | 0        | 0        | 0         | 0.412416  | 0        | 0        | 0.889303  | 0        | 0        | 0        | 0        | 0         | 0.066991 | NA       | 0.136991 | NA       | 0        | NA        |
| AT2G39420 | AT2G39420 | 170.0133 | 194.4828 | 151.9432  | 440.0474  | 463.7271 | 408.7047 | 368.1716  | 361.4281 | 503.7429 | 168.8783 | 179.5951 | 164.7091  | 1.326376 | 1.99E-15 | 1.23633  | 3.02E-13 | -0.00462 | 0.992945  |
| AT2G39430 | DIR9      | 9.511232 | 3.568492 | 6.438272  | 1.649662  | 0.662467 | 0        | 0.889303  | 2.15778  | 1.952492 | 4.797678 | 3.991002 | 3.10772   | -1.65309 | 0.007379 | -1.23713 | 0.061266 | -0.51611 | NA        |
| AT2G39435 | AT2G39435 | 65.38972 | 78.50683 | 68.24568  | 40.41673  | 38.4231  | 46.85152 | 58.69403  | 65.81229 | 51.74104 | 82.52006 | 59.86503 | 108.7702  | -0.72337 | 0.006484 | -0.24829 | 0.43994  | 0.254382 | 0.599666  |
| AT2G39440 | AT2G39440 | 57.06739 | 35.68492 | 74.68395  | 49.48987  | 62.93439 | 50.83888 | 38.24005  | 29.13003 | 62.47974 | 35.50282 | 46.56169 | 73.54963  | -0.04847 | 0.918109 | -0.34824 | 0.408623 | -0.11177 | 0.892499  |
| AT2G39445 | AT2G39445 | 36.85602 | 33.90067 | 47.64321  | 50.72712  | 43.06037 | 41.86731 | 32.90423  | 44.23449 | 36.1211  | 37.42189 | 30.59768 | 36.25236  | 0.191632 | 0.57032  | -0.07747 | 0.851683 | -0.17369 | 0.785928  |
| AT2G39450 | MTP11     | 732.3648 | 888.5545 | 793.1951  | 568.3087  | 529.9738 | 554.2435 | 568.2649  | 563.1805 | 623.8121 | 759.5922 | 831.4587 | 660.9084  | -0.53661 | 0.000034 | -0.45094 | 0.000821 | -0.09736 | 0.71872   |
| AT2G39460 | RPL23AA   | 1863.012 | 1973.376 | 2365.421  | 2985.064  | 3054.637 | 2083.397 | 2281.063  | 1738.092 | 2731.536 | 2153.198 | 2723.194 | 2885      | 0.378805 | 0.083842 | 0.118882 | 0.658582 | 0.314036 | 0.360146  |
| AT2G39470 | PNSL1     | 1096.169 | 1459.513 | 1438.31   | 944.0193  | 1037.424 | 842.3305 | 1324.173  | 1336.745 | 1552.231 | 1535.257 | 1452.725 | 1562.147  | -0.48993 | 0.000837 | 0.07778  | 0.687129 | 0.187544 | 0.470585  |
| AT2G39480 | ABC86     | 527.8734 | 431.7875 | 399.1728  | 293.6399  | 268.9617 | 351.8848 | 388.2656  | 458.5282 | 391.4746 | 309.93   | 309.9678 | 357.3878  | -0.56903 | 0.000545 | -0.13461 | 0.514422 | -0.46817 | 0.038423  |
| AT2G39490 | AT2G39490 | 0        | 0        | 0         | 0.1237247 | 0        | 0        | 0.1324935 | 0.996841 | 0.889303 | 0        | 0        | 0.2071813 | 0.611607 | NA       | 0.153037 | NA       | 0.347265 | NA        |
| AT2G39500 | AT2G39500 | 28.53369 | 21.41095 | 23.17778  | 44.54088  | 49.68505 | 23.92418 | 30.23632  | 26.97225 | 76.14719 | 41.26003 | 42.57069 | 49.72351  | 0.611133 | 0.152508 | 0.750974 | 0.084739 | 0.75182  | 0.225684  |
| AT2G39510 | AT2G39510 | 2.377808 | 8.92123  | 2.575309  | 1.649662  | 3.312336 | 0.996841 | 0         | 0.107889 | 0        | 4.797678 | 6.56167  | 5.72951   | -0.64625 | 0.354152 | -1.38379 | 0.036011 | 0.268729 | NA        |
| AT2G39518 | AT2G39518 | 2.377808 | 3.568492 | 1.287654  | 26.3946   | 31.13596 | 26.9147  | 21.34328  | 33.44559 | 20.50117 | 2.878607 | 7.982004 | 1.035907  | 2.647017 | 3.3E-08  | 2.47156  | 4.62E-07 | 0.269047 | NA        |
| AT2G39520 | AT2G39520 | 0        | 0        | 0         | 0         | 0        | 0        | 0         | 0        | 0        | 0        | 0        | 0         | 0        | 0        | 0        | 0        | 0        | 0         |
| AT2G39530 | AT2G39530 | 0        | 0        | 0         | 13.60971  | 9.937009 | 17.94313 | 5.335821  | 2.15778  | 3.904984 | 0        | 0        | 0         | 2.872303 | 6.01E-07 | 1.357593 | 0.037336 | 0        | NA        |
| AT2G39540 | AT2G39540 | 0        | 0        | 0         | 0.412416  | 0        | 0        | 0         | 0        | 0        | 0        | 0        | 0         | 0.095918 | NA       | 0.136991 | NA       | 0        | NA        |
| AT2G39550 | GGB       | 150.9908 | 162.3664 | 151.9432  | 264.3584  | 248.4252 | 235.2544 | 202.7612  | 182.3324 | 166.9381 | 182.3118 | 174.2738 | 167.8169  | 0.683517 | 9.09E-06 | 0.247375 | 0.187417 | 0.17     |           |



|           |           |          |          |          |          |           |          |          |          |          |          |          |          |           |          |          |          |          |          |
|-----------|-----------|----------|----------|----------|----------|-----------|----------|----------|----------|----------|----------|----------|----------|-----------|----------|----------|----------|----------|----------|
| ATZG39990 | TIF3F1    | 603.9632 | 588.8012 | 598.7593 | 606.6633 | 654.5177  | 682.8359 | 598.5012 | 604.1784 | 680.4435 | 558.4497 | 468.2776 | 571.8204 | 0.113209  | 0.445269 | 0.070538 | 0.673736 | -0.15975 | 0.489046 |
| ATZG40000 | HSRPO2    | 752.5762 | 981.3353 | 784.1815 | 2649.77  | 2698.892  | 5142.702 | 5019.229 | 4792.429 | 5500.17  | 578.6    | 602.6413 | 625.6875 | 1.986056  | 1.34E-20 | 2.514019 | 1.11E-32 | -0.4592  | 0.196396 |
| ATZG40004 | ATZG40004 | 0        | 0        | 0        | 0.412416 | 0.662467  | 1.93682  | 0        | 0        | 0        | 0        | 0        | 0        | 0.557527  | NA       | 0        | NA       | 0        | NA       |
| ATZG40008 | ATZG40008 | 0        | 0        | 0        | 0        | 0         | 0        | 0.889303 | 0        | 0        | 0        | 0        | 0        | 0         | NA       | 0        | NA       | 0        | NA       |
| ATZG40010 | RPP0A     | 55.87849 | 0.03766  | 33.47901 | 39.17948 | 43.72284  | 31.8989  | 24.9005  | 20.49891 | 25.3824  | 49.89585 | 49.22236 | 38.32854 | -0.16688  | 0.643942 | -0.82204 | 0.01302  | 0.061672 | 0.936502 |
| ATZG40020 | ATZG40020 | 219.9472 | 248.0102 | 220.1889 | 221.8796 | 267.6368  | 173.4503 | 173.4142 | 180.1746 | 198.1779 | 379.9761 | 351.2082 | 292.1256 | -0.04172  | 0.869237 | -0.30741 | 0.158293 | 0.563414 | 0.022287 |
| ATZG40030 | NRPE1     | 150.9908 | 87.42806 | 109.4506 | 54.85127 | 47.69764  | 75.7599  | 79.14801 | 86.3112  | 59.5101  | 103.6298 | 87.80204 | 131.5601 | -0.94725  | 0.000346 | -0.61139 | 0.037175 | -0.10913 | 0.860324 |
| ATZG40050 | ATZG40050 | 1.188904 | 0        | 5.150617 | 2.062078 | 0         | 0.996841 | 1.778600 | 0        | 0.976246 | 0        | 2.660668 | 3.10772  | -0.38279  | 0.597764 | -0.41983 | 0.572792 | -0.08591 | NA       |
| ATZG40060 | CLC2      | 802.5102 | 808.2635 | 776.4556 | 764.6185 | 818.8095  | 719.719  | 768.3582 | 785.4319 | 982.1035 | 877.0156 | 923.2518 | 803.8635 | -0.04965  | 0.775301 | 0.086441 | 0.618181 | 0.123416 | 0.63088  |
| ATZG40070 | ATZG40070 | 331.7042 | 319.38   | 262.6815 | 196.7222 | 167.6042  | 225.286  | 208.097  | 309.6414 | 196.2254 | 291.6988 | 315.2892 | 281.7666 | -0.61865  | 0.002178 | -0.34861 | 0.121819 | -0.03914 | 0.940496 |
| ATZG40080 | ELF4      | 40.42273 | 58.8012  | 66.95803 | 225.5913 | 235.1759  | 259.1786 | 1001.356 | 1070.259 | 1928.086 | 83.4796  | 158.3097 | 64.2262  | 1.844722  | 1.17E-06 | 4.085436 | 1.02E-29 | 0.745714 | 0.227753 |
| ATZG40081 | ATZG40081 | 0        | 0        | 0        | 0        | 0         | 0        | 0        | 0        | 0        | 0        | 0        | 0        | #N/A      | #N/A     | #N/A     | #N/A     | #N/A     | #N/A     |
| ATZG40085 | ATZG40085 | 3.566712 | 5.352738 | 3.862963 | 9.897974 | 7.28714   | 0.996841 | 6.225124 | 6.47334  | 17.57243 | 3.838143 | 9.312338 | 8.287252 | 0.383428  | 0.580808 | 0.858885 | 0.188542 | 0.470067 | NA       |
| ATZG40090 | ATATH9    | 129.5905 | 108.839  | 113.3136 | 139.8089 | 154.3549  | 176.4408 | 177.8607 | 180.1746 | 121.0545 | 141.0517 | 162.3007 | 105.6625 | 0.392735  | 0.09978  | 0.4247   | 0.087616 | 0.198448 | 0.655065 |
| ATZG40095 | ATZG40095 | 19.02246 | 26.76369 | 30.9037  | 121.2502 | 138.4557  | 135.5703 | 121.8346 | 105.7312 | 125.9357 | 14.39033 | 13.30334 | 16.5745  | 2.264703  | 1.12E-19 | 2.110321 | 1.16E-16 | -0.68557 | 0.177994 |
| ATZG40100 | LHC84.3   | 228.2696 | 169.5034 | 213.7506 | 107.228  | 99.37009  | 88.71883 | 128.0597 | 173.7013 | 214.7741 | 252.3579 | 224.8264 | 243.438  | -1.01733  | 5.24E-07 | -0.24653 | 0.315828 | 0.224995 | 0.553904 |
| ATZG40110 | ATZG40110 | 59.4452  | 55.31163 | 77.25926 | 183.9733 | 237.1633  | 186.4092 | 204.5398 | 157.5179 | 232.3465 | 77.72239 | 78.4897  | 62.15439 | 1.59096   | 3.69E-13 | 1.561122 | 0.20E-12 | 0.160715 | 0.759001 |
| ATZG40113 | ATZG40113 | 3.566712 | 1.784246 | 0        | 2.474493 | 2.649869  | 8.971567 | 8.003731 | 4.31556  | 2.928738 | 0        | 1.330334 | 0        | 0.705923  | 0.309072 | 0.829333 | 0.244488 | -0.59723 | NA       |
| ATZG40116 | PLC6      | 0        | 0        | 0        | 0.662467 | 0         | 0.889303 | 0        | 0        | 1.919071 | 0        | 1.035907 | 0        | 0.082217  | NA       | 0.147923 | NA       | 0.489613 | NA       |
| ATZG40120 | ATZG40120 | 85.60108 | 64.23286 | 72.10864 | 53.20161 | 38.4231   | 41.86731 | 66.69776 | 59.33895 | 47.83605 | 57.7214  | 51.88302 | 99.44703 | -0.68658  | 0.020278 | -0.33856 | 0.322719 | -0.08304 | 0.905142 |
| ATZG40130 | ATZG40130 | 233.0252 | 183.7773 | 181.5593 | 82.0029  | 68.9666   | 59.81045 | 101.3806 | 107.889  | 88.83839 | 225.4909 | 183.5861 | 238.2585 | -1.62838  | 8E-19    | -0.98688 | 1.83E-07 | 0.111451 | 0.779682 |
| ATZG40140 | CFZ1      | 410.4236 | 265.8272 | 202.7642 | 79.4249  | 75.5.2127 | 1185.244 | 1407.767 | 1496.42  | 1247.642 | 180.3927 | 230.1478 | 175.0682 | 1.871391  | 1.7E-21  | 2.499481 | 0.95E-38 | -0.2469  | 0.538161 |
| ATZG40150 | TBL28     | 87.97889 | 73.15409 | 95.28642 | 58.97543 | 59.62205  | 55.82308 | 36.46144 | 42.07671 | 33.19236 | 100.7512 | 109.0874 | 102.5547 | -0.54519  | 0.013956 | -1.1649  | 5.43E-07 | 0.264401 | 0.491558 |
| ATZG40160 | TBL30     | 51.12287 | 32.11643 | 38.62963 | 48.25262 | 50.34751  | 34.88943 | 43.57587 | 40.99782 | 38.31113 | 47.01725 | 38.57969 | 40.40035 | 0.122811  | 0.743426 | -0.12326 | 0.766566 | 0.030508 | 0.971681 |
| ATZG40170 | EM6       | 0        | 0        | 0        | 11.96005 | 5.299738  | 11.96209 | 4.446517 | 2.15778  | 3.904984 | 0        | 1.035907 | 0        | 2.413065  | 4.49E-05 | 1.266662 | 0.055503 | 0.076618 | NA       |
| ATZG40180 | PP2C5     | 1.188904 | 1.784246 | 6.438272 | 20.20836 | 17.22415  | 14.95261 | 7.114428 | 9.710009 | 6.833722 | 4.797678 | 2.660668 | 2.071813 | 1.884077  | 0.000303 | 0.858389 | 0.168212 | -0.03096 | NA       |
| ATZG40190 | ALG11     | 124.8349 | 94.56504 | 168.6827 | 135.2723 | 164.2919  | 160.4914 | 160.0746 | 148.8868 | 131.7932 | 129.5373 | 113.0784 | 131.5601 | 0.218088  | 0.364634 | 0.164537 | 0.539444 | -0.06162 | 0.907542 |
| ATZG40200 | BHLLH51   | 11.88904 | 14.27397 | 12.87654 | 26.3946  | 46.37271  | 29.90522 | 31.12562 | 20.49891 | 18.54867 | 16.31211 | 14.63367 | 8.287252 | 1.238236  | 0.002299 | 0.741529 | 0.109864 | 0.002347 | 0.998194 |
| ATZG40205 | RPL41E    | 4.755616 | 3.568492 | 12.87654 | 15.67179 | 20.53649  | 5.981045 | 16.89677 | 8.63112  | 38.07359 | 7.676285 | 18.62468 | 37.29264 | 0.662353  | 0.281937 | 1.100748 | 0.065278 | 1.094644 | NA       |
| ATZG40210 | AGL48     | 0        | 0        | 0        | 0        | 0         | 0        | 0        | 0        | 0        | 0        | 0        | 0        | #N/A      | #N/A     | #N/A     | #N/A     | #N/A     | #N/A     |
| ATZG40220 | AB14      | 0        | 0        | 0        | 0        | 0         | 0        | 0        | 0        | 0        | 0        | 0        | 0        | #N/A      | #N/A     | #N/A     | #N/A     | #N/A     | #N/A     |
| ATZG40230 | ATZG40230 | 45.17835 | 49.95889 | 45.0679  | 21.44561 | 16.56168  | 14.95261 | 18.67537 | 19.42002 | 24.40615 | 43.1791  | 19.95501 | 37.29264 | -1.25937  | 0.000105 | -1.06833 | 0.002032 | -0.41726 | 0.471105 |
| ATZG40233 | ATZG40233 | 0        | 0        | 0        | 0        | 0         | 0        | 0        | 0        | 0        | 0        | 0        | 0        | #N/A      | #N/A     | #N/A     | #N/A     | #N/A     | #N/A     |
| ATZG40240 | ATZG40240 | 27.34479 | 26.76369 | 20.60247 | 18.97112 | 19.21155  | 10.96525 | 16.89677 | 18.34113 | 33.19236 | 13.4335  | 19.95501 | 22.78994 | -0.50048  | 0.244528 | -0.10738 | 0.845094 | -0.36742 | 0.629251 |
| ATZG40250 | ATZG40250 | 1.188904 | 1.784246 | 2.575309 | 0        | 0         | 0        | 0        | 0        | 0.995936 | 3.991002 | 2.071813 | 0        | -1.07132  | 0.073814 | -0.94806 | 0.122945 | 0.196477 | NA       |
| ATZG40260 | ATZG40260 | 30.9115  | 44.60615 | 60.51975 | 37.94223 | 50.34751  | 32.89575 | 48.02239 | 37.76115 | 37.09735 | 47.01725 | 71.83803 | 54.92005 | -0.14578  | 0.706487 | -0.12917 | 0.761952 | 0.323954 | 0.570796 |
| ATZG40270 | ATZG40270 | 768.0319 | 744.0306 | 748.1272 | 888.3431 | 1033.449  | 1058.645 | 950.6654 | 761.6963 | 657.0136 | 526.7851 | 484.2416 | 526.3043 | 0.391118  | 0.0122   | 0.067616 | 0.745265 | -0.54618 | 0.004634 |
| ATZG40280 | ATZG40280 | 313.8706 | 293.1952 | 269.1198 | 178.9884 | 169.5916  | 186.4092 | 173.4142 | 230.8824 | 136.6744 | 207.2597 | 207.5321 | 258.9766 | -0.59715  | 0.003811 | -0.58286 | 0.006659 | -0.27096 | 0.453336 |
| ATZG40290 | ATZG40290 | 573.0517 | 592.3697 | 567.8556 | 561.2976 | 519.3743  | 570.1929 | 421.5299 | 520.025  | 517.4104 | 515.2706 | 454.9742 | 530.3841 | -0.06892  | 0.674666 | -0.24641 | 0.094157 | -0.20192 | 0.366371 |
| ATZG40300 | FER4      | 469.6171 | 501.3731 | 553.6914 | 761.7316 | 688.966   | 659.9086 | 816.3806 | 754.1441 | 918.6475 | 658.2414 | 751.6387 | 661.9443 | 0.46593   | 0.000586 | 0.698848 | 1.19E-07 | 0.434803 | 0.014066 |
| ATZG40310 | ATZG40310 | 0        | 0        | 0        | 0        | 0         | 0        | 0        | 0        | 0        | 0        | 1.330334 | 0        | 0         | NA       | 0        | NA       | 0.172362 | NA       |
| ATZG40316 | ATZG40316 | 217.5694 | 239.089  | 226.6272 | 218.1678 | 254.3874  | 230.2702 | 200.0933 | 152.1235 | 202.0829 | 245.6411 | 198.2198 | 226.8635 | 0.041633  | 0.851249 | -0.28909 | 0.134166 | -0.01805 | 0.970574 |
| ATZG40320 | TBL33     | 48.74506 | 35.68492 | 45.0679  | 20.62078 | 21.19895  | 21.9305  | 21.34828 | 20.49891 | 19.52492 | 57.57214 | 70.5077  | 42.47217 | -0.97683  | 0.001427 | -1.01055 | 0.002014 | 0.355208 | 0.502444 |
| ATZG40330 | PYL6      | 8.322328 | 1.784246 | 5.150617 | 27.63184 | 27.82363  | 14.95261 | 13.39455 | 5.39445  | 12.6912  | 6.716749 | 1.330334 | 4.143626 | 1.73365   | 0.000549 | 1.713059 | 0.240398 | -0.24192 | NA       |
| ATZG40340 | DREB2C    | 3.566712 | 0        | 6.438272 | 77.94654 | 67.57166  | 90.71251 | 160.446  | 128.3879 | 122.3007 | 1.919071 | 2.660668 | 0        | 3.655054  | 1.19E-20 | 4.435575 | 2.71E-30 | -0.63572 | 0.50721  |
| ATZG40350 | DREB2H    | 0        | 0        | 0        | 1.649662 | 0.662467  | 2.990522 | 7.114428 | 11.86779 | 14.64369 | 0        | 0        | 0        | 0.703517  | 0.305185 | 2.653317 | 7.21E-06 | 0        | NA       |
| ATZG40360 | ATZG40360 | 664.5973 | 635.1916 | 674.7309 | 675.9491 | 630.0064  | 744.6401 | 688.3209 | 700.1996 | 591.6051 | 580.5191 | 558.7403 | 644.3339 | 0.050337  | 0.760839 | 0.002628 | 0.988746 | -0.14509 | 0.544146 |
| ATZG40370 | LAC5      | 3.566712 | 0        | 3.862963 | 4.124156 | 1.987402  | 1.993682 | 3.557214 | 3.23667  | 1.952492 | 3.838143 | 1.330334 | 3.10772  | 0.049811  | 0.953725 | 0.072877 | 0.934866 | 0.049604 | NA       |
| ATZG40380 | PRA182    | 185.469  | 140.9554 | 163.5321 | 161.6669 | 174.8914  | 159.4945 | 131.6169 | 128.3879 | 217.7029 | 140.0922 | 148.9974 | 131.5601 | 0.011014  | 0.971072 | -0.04192 | 0.984872 | -0.22162 | 0.597783 |
| ATZG40390 | ATZG40390 | 23.77808 | 26.76369 | 16.73951 | 30.93117 | 31.79843  | 32.89575 | 43.57587 | 40.99782 | 27.33489 | 22.06932 | 22.61568 | 22.78994 | 0.476473  | 0.19012  | 0.693573 | 0.057533 | 0.0149   | 0.988889 |
| ATZG40400 | ATZG40400 | 781.1099 | 724.4039 | 694.0457 | 369.5244 | 366.3444  | 390.7616 | 336.1567 | 359.2703 | 269.4439 | 827.1197 | 984.4471 | 763.6431 | -0.965307 | 1.78E-11 | -1.17156 | 3E-16    | 0.2219   | 0.37122  |
| ATZG40410 | CAN2      | 227.0807 | 248.0102 | 238.2161 | 351.7905 | 331.2336  | 341.9164 | 263.2338 | 266.4858 | 311.4225 | 196.7048 | 148.9974 | 261.0484 | 0.514116  | 0.006528 | 0.232424 | 0.290283 | -0.2181  | 0.5      |

|           |           |          |          |          |          |          |          |          |          |          |          |          |          |          |          |          |          |          |          |
|-----------|-----------|----------|----------|----------|----------|----------|----------|----------|----------|----------|----------|----------|----------|----------|----------|----------|----------|----------|----------|
| ATZG40880 | CYS3      | 584.9407 | 749.3833 | 804.784  | 1068.981 | 1150.043 | 803.4537 | 844.8383 | 704.5151 | 1305.241 | 777.2239 | 955.1798 | 940.6031 | 0.482876 | 0.043989 | 0.402323 | 0.115595 | 0.310093 | 0.437917 |
| ATZG40900 | CYP98A3   | 405.4162 | 397.8869 | 390.1593 | 379.0099 | 325.9339 | 375.809  | 349.4963 | 379.7693 | 440.2869 | 324.323  | 266.0668 | 349.1005 | -0.14092 | 0.430757 | -0.02934 | 0.894642 | -0.33504 | 0.15423  |
| ATZG40900 | ATZG40900 | 54.68958 | 46.3904  | 48.93086 | 30.10634 | 32.4609  | 25.91786 | 16.00746 | 19.42002 | 16.59618 | 42.21957 | 38.57969 | 56.97486 | -0.7127  | 0.015039 | -1.4245  | 5.14E-06 | -0.11349 | 0.866179 |
| ATZG40910 | ATZG40910 | 0        | 1.784246 | 0        | 0        | 0.662467 | 0        | 1.778607 | 2.15778  | 0        | 0        | 0        | 1.035907 | -0.19574 | NA       | 0.357643 | NA       | -0.08154 | NA       |
| ATZG40920 | ATZG40920 | 160.502  | 149.8767 | 163.5321 | 132.3854 | 119.2441 | 116.6304 | 128.949  | 128.3879 | 117      | 127.6182 | 139.6851 | 156.4219 | -0.35171 | 0.052018 | -0.34365 | 0.077946 | -0.16264 | 0.632192 |
| ATZG40925 | ATZG40925 | 0        | 0        | 0        | 0.412416 | 0        | 0        | 1.778607 | 0        | 0.976246 | 0        | 0        | 0        | 0.06212  | NA       | 0.46701  | NA       | 0        | NA       |
| ATZG40930 | URP5      | 263.9367 | 265.8527 | 243.3667 | 229.3031 | 192.1155 | 265.1596 | 242.7799 | 280.5114 | 153.2706 | 213.9764 | 212.8534 | 175.0862 | -0.16851 | 0.516741 | -0.18664 | 0.493582 | -0.34936 | 0.337418 |
| ATZG40935 | PCR10     | 52.31177 | 57.09587 | 43.78025 | 74.6722  | 68.23413 | 72.76938 | 84.48383 | 97.10009 | 68.33722 | 49.89585 | 59.86503 | 74.58527 | 0.480663 | 0.061744 | 0.681305 | 0.010122 | 0.259714 | 0.59788  |
| ATZG40940 | ERS1      | 586.1296 | 587.0169 | 566.5679 | 594.2908 | 589.5959 | 677.8517 | 633.1841 | 631.1506 | 397.3321 | 450.0222 | 477.5899 | 444.4039 | 0.094434 | 0.667975 | -0.06467 | 0.792814 | -0.33578 | 0.227791 |
| ATZG40950 | BZIP17    | 196.1692 | 171.2876 | 163.5321 | 281.2674 | 291.4856 | 284.0996 | 249.8943 | 261.0914 | 187.9342 | 165.9997 | 176.9344 | 168.8528 | 0.673964 | 4.61E-05 | 0.383021 | 0.03901  | -0.05789 | 0.891191 |
| ATZG40955 | ATZG40955 | 0        | 0        | 0        | 0        | 0        | 0        | 1.778607 | 1.07889  | 0.976246 | 0        | 0        | 0        | 0.035907 | 0        | 0.682983 | NA       | 0.193216 | NA       |
| ATZG40960 | ATZG40960 | 357.8601 | 388.9656 | 418.4877 | 329.9325 | 327.9213 | 338.9259 | 330.8209 | 239.5136 | 192.3205 | 503.7562 | 565.3919 | 450.0395 | -0.21947 | 0.33049  | -0.59199 | 0.004343 | 0.329379 | 0.30711  |
| ATZG40970 | MVBC1     | 66.57862 | 73.15409 | 73.3963  | 58.1506  | 74.19633 | 50.83888 | 49.80099 | 52.86561 | 58.57476 | 48.93632 | 59.86503 | 72.51346 | -0.19754 | 0.49902  | -0.38231 | 0.190664 | -0.22192 | 0.65505  |
| ATZG40980 | ATZG40980 | 253.2365 | 205.1883 | 229.2025 | 132.3854 | 153.0299 | 164.4787 | 169.857  | 193.1213 | 158.1519 | 209.1788 | 190.2378 | 197.8581 | -0.62007 | 0.000165 | -0.40142 | 0.025715 | -0.20396 | 0.502394 |
| ATZG40990 | PAT02     | 0        | 0        | 0        | 0        | 0        | 0        | 0        | 0        | 0        | 0        | 0        | 0        | NA       | NA       | NA       | NA       | NA       | NA       |
| ATZG40995 | ATZG40995 | 0        | 0        | 0        | 0        | 0        | 0        | 0        | 0        | 0        | 0        | 0        | 0        | NA       | NA       | NA       | NA       | NA       | NA       |
| ATZG41000 | ATJ72     | 49.93397 | 66.0171  | 50.21852 | 73.40997 | 79.49607 | 56.81992 | 79.14801 | 67.97007 | 66.38473 | 54.69353 | 57.20436 | 32.1131  | 0.348514 | 0.235116 | 0.36202  | 0.246565 | -0.18799 | 0.747719 |
| ATZG41010 | CAMBP25   | 47.55616 | 46.3904  | 48.93086 | 82.0707  | 72.8714  | 125.6019 | 97.82338 | 111.1257 | 105.4346 | 47.01725 | 50.55269 | 34.18492 | 0.903165 | 0.000704 | 1.078435 | 5.58E-05 | -0.12118 | 0.856796 |
| ATZG41020 | ATZG41020 | 82.03437 | 76.72258 | 87.5605  | 125.7868 | 90.75802 | 96.69356 | 88.93035 | 87.39009 | 99.57709 | 80.60099 | 105.0964 | 95.3034  | 0.344876 | 0.147929 | 0.15286  | 0.598525 | 0.170524 | 0.712267 |
| ATZG41040 | ATZG41040 | 118.8904 | 115.976  | 123.6148 | 92.7935  | 84.79581 | 103.6714 | 126.2811 | 124.0723 | 119.102  | 118.0229 | 131.7031 | 142.9551 | -0.3537  | 0.071239 | 0.040894 | 0.878829 | 0.124776 | 0.749819 |
| ATZG41050 | ATZG41050 | 47.55616 | 42.8219  | 46.38272 | 35.46774 | 27.82363 | 16.94629 | 35.57214 | 32.3667  | 27.33489 | 52.77446 | 50.55269 | 62.15439 | -0.84449 | 0.006147 | -0.66027 | 0.049317 | 0.086831 | 0.950542 |
| ATZG41060 | UBA2B     | 199.7359 | 203.404  | 224.0519 | 204.9705 | 157.0047 | 200.365  | 232.9975 | 222.2513 | 103.4821 | 208.2192 | 195.5591 | 246.5458 | -0.15074 | 0.632825 | -0.15945 | 0.633984 | 0.050897 | 0.939653 |
| ATZG41070 | DPBF4     | 45.17835 | 30.33218 | 28.3284  | 64.33683 | 82.80841 | 48.8452  | 32.01493 | 56.10228 | 68.33722 | 32.62421 | 51.88302 | 43.50807 | 0.839929 | 0.014193 | 0.521307 | 0.179848 | 0.248722 | 0.726018 |
| ATZG41080 | PCMP-H29  | 96.30122 | 123.113  | 103.0123 | 105.166  | 109.9696 | 101.6778 | 86.26244 | 99.25787 | 67.36097 | 113.2252 | 86.47171 | 97.37521 | -0.01041 | 0.971382 | -0.33091 | 0.180793 | -0.09488 | 0.850046 |
| ATZG41082 | ATZG41082 | 3.566712 | 5.352738 | 1.287654 | 9.073143 | 7.28714  | 2.990522 | 3.557214 | 4.31556  | 6.833722 | 0        | 1.330334 | 3.10772  | 0.719614 | 0.277585 | 0.363643 | 0.640794 | -0.56374 | NA       |
| ATZG41090 | CML10     | 3089.961 | 3830.776 | 4000.742 | 7013.539 | 6937.357 | 5937.184 | 2931.144 | 2673.489 | 3469.578 | 2360.458 | 1841.182 | 3084.93  | 0.844025 | 6.32E-06 | -0.26038 | 0.242103 | -0.5684  | 0.024565 |
| ATZG41100 | CML12     | 1255.483 | 1960.886 | 1503.98  | 7949.31  | 6960.544 | 9227.755 | 8820.112 | 9027.072 | 9314.363 | 804.0909 | 971.1438 | 1108.42  | 2.30372  | 1.01E-02 | 2.470459 | 3.87E-49 | -0.69231 | 0.00191  |
| ATZG41110 | CAM2      | 212.8138 | 231.952  | 215.0383 | 533.6658 | 616.0946 | 477.4867 | 305.0311 | 322.5881 | 548.6502 | 189.0285 | 246.1118 | 187.4991 | 1.260252 | 7.02E-09 | 0.805337 | 0.000479 | -0.08333 | 0.879636 |
| ATZG41120 | ATZG41120 | 121.2682 | 137.3869 | 142.9296 | 105.166  | 125.8688 | 125.6019 | 144.9655 | 131.6246 | 159.1322 | 147.6671 | 166.781  | 166.781  | -0.17577 | 0.405607 | 0.032057 | 0.903974 | 0.306895 | 0.304362 |
| ATZG41130 | BHLH106   | 54.68958 | 49.95889 | 56.65679 | 48.25262 | 49.68505 | 49.68505 | 50.02339 | 52.71728 | 59.49121 | 62.5257  | 62.5257  | 62.54539 | -0.26753 | 0.356067 | -0.05713 | 0.877723 | 0.175906 | 0.742031 |
| ATZG41140 | CRK1      | 40.79141 | 339.0067 | 347.6667 | 283.7419 | 287.5108 | 250.207  | 318.706  | 276.1958 | 337.7811 | 272.5081 | 266.0668 | 338.7414 | -0.40641 | 0.012333 | -0.22968 | 0.212361 | -0.31519 | 0.208313 |
| ATZG41150 | ATZG41150 | 20.21137 | 16.05821 | 30.9037  | 26.80701 | 19.21155 | 10.96525 | 32.01493 | 19.42002 | 28.11113 | 34.54328 | 22.61568 | 30.04129 | -0.18173 | 0.711279 | 0.209876 | 0.681539 | -0.32975 | 0.665137 |
| ATZG41160 | ATZG41160 | 164.0687 | 173.0719 | 194.4358 | 251.9859 | 290.1607 | 275.1281 | 258.7873 | 256.7758 | 187.4392 | 183.2173 | 174.2738 | 149.1705 | 0.604837 | 0.000729 | 0.393647 | 0.046339 | -0.06848 | 0.878139 |
| ATZG41170 | ATZG41170 | 167.6355 | 210.541  | 207.3123 | 151.2626 | 119.2441 | 149.5261 | 42.68657 | 61.49673 | 69.31347 | 165.9997 | 146.3367 | 147.0987 | -0.57461 | 0.003968 | -1.69749 | 8.32E-17 | -0.33276 | 0.30711  |
| ATZG41178 | ATZG41178 | 0        | 0        | 0        | 1.237247 | 1.987402 | 0.996841 | 0        | 0        | 1.952492 | 0        | 0        | 0        | 0.70932  | NA       | 0.322285 | NA       | 0        | NA       |
| ATZG41180 | SIB2      | 46.36725 | 89.2123  | 65.67037 | 127.4364 | 136.4683 | 147.5324 | 181.4179 | 204.9891 | 250.8952 | 63.32935 | 58.53469 | 76.65708 | 1.01368  | 1.16E-05 | 1.631258 | 2.59E-13 | 0.012465 | 0.987026 |
| ATZG41190 | ATZG41190 | 48.74506 | 78.50683 | 63.09506 | 60.62509 | 51.67245 | 83.73463 | 53.35821 | 50.70783 | 29.28738 | 82.52006 | 38.57969 | 48.68761 | 0.042566 | 0.925108 | -0.04598 | 0.232914 | -0.12564 | 0.871288 |
| ATZG41200 | ATZG41200 | 27.34479 | 33.90067 | 38.62963 | 28.45667 | 25.17376 | 27.91154 | 28.45771 | 17.26224 | 41.00233 | 54.69353 | 29.26735 | 37.29264 | -0.26381 | 0.523936 | -0.17483 | 0.711075 | 0.277311 | 0.689625 |
| ATZG41210 | PIP5K5    | 126.0238 | 149.8767 | 135.2037 | 99.80457 | 95.39529 | 97.6904  | 116.4998 | 103.5734 | 101.5296 | 154.4852 | 102.4357 | 184.3914 | -0.46699 | 0.039827 | -0.33509 | 0.180761 | 0.11592  | 0.806773 |
| ATZG41220 | GLU2      | 552.8403 | 438.9245 | 404.3235 | 429.737  | 363.6945 | 422.6605 | 328.153  | 468.2382 | 281.1588 | 427.9529 | 316.6195 | 370.8545 | -0.19486 | 0.421021 | -0.36618 | 0.116362 | -0.31338 | 0.372189 |
| ATZG41225 | ATZG41225 | 0        | 0        | 0        | 0        | 0        | 0        | 0        | 0        | 0        | 0        | 0        | 0        | NA       | NA       | NA       | NA       | NA       | NA       |
| ATZG41230 | ORS1      | 1.188904 | 1.784246 | 5.150617 | 0.824831 | 2.649869 | 0        | 0        | 2.15778  | 0.976246 | 3.838143 | 1.330334 | 1.035907 | -0.52328 | 0.469712 | -0.58712 | 0.428007 | -0.16516 | NA       |
| ATZG41231 | ATZG41231 | 0        | 0        | 0        | 0        | 0.662467 | 0        | 0        | 0        | 0        | 0        | 0        | 0        | 0.128567 | NA       | 0        | NA       | 0        | NA       |
| ATZG41233 | ATZG41233 | 0        | 0        | 0        | 0        | 0        | 0        | 0.889303 | 0        | 0        | 0        | 0        | 0        | 0        | NA       | 0.160764 | NA       | 0        | NA       |
| ATZG41240 | BHLH100   | 0        | 7.136984 | 2.575309 | 0.412416 | 0        | 0        | 1.07889  | 0        | 1.919071 | 2.660668 | 2.071813 | -1.2155  | 0.051017 | -0.10182 | 0.120882 | -0.19716 | 0        | NA       |
| ATZG41250 | ATZG41250 | 8508.509 | 544.195  | 491.884  | 1408.399 | 1324.272 | 1011.793 | 508.6816 | 466.0805 | 492.028  | 51.41325 | 469.6079 | 517.9533 | 1.264362 | 5.84E-20 | -0.07155 | 0.726233 | -0.03988 | 0.916924 |
| ATZG41260 | M17       | 0        | 0        | 1.287654 | 9.897974 | 11.92441 | 11.96209 | 10.67164 | 29.13003 | 4.88123  | 0.959536 | 0        | 2.071813 | 2.082422 | 0.000404 | 2.381493 | 5.15E-05 | 0.13667  | NA       |
| ATZG41270 | ATZG41270 | 0        | 0        | 0        | 0        | 0        | 0        | 0        | 0        | 0        | 0        | 0        | 0        | NA       | NA       | NA       | NA       | NA       | NA       |
| ATZG41280 | M10       | 0        | 0        | 1.237247 | 0.662467 | 0        | 0        | 1.07889  | 0        | 0        | 0        | 0        | 0        | 0.354932 | NA       | 0.164413 | NA       | 0        | NA       |
| ATZG41290 | SSL2      | 47.55616 | 64.23286 | 61.80741 | 23.9201  | 15.89921 | 28.90838 | 27.56841 | 24.81447 | 24.40615 | 59.49121 | 38.57969 | 66.29802 | -1.25661 | 2.85E-05 | -1.08309 | 0.000674 | -0.04857 | 0.951828 |
| ATZG41300 | SSL1      | 9.511232 | 10.70548 | 12.87654 | 7.42348  | 3.974804 | 3.987363 | 6.225124 | 4.67334  | 4.88123  | 7.676285 | 5.321336 | 8.287252 | -0.8183  | 0.130811 | -0.71539 | 0.228837 | -0.48848 | NA       |
| ATZG41310 | ARR8      | 19.02246 | 265.8527 | 391.4469 | 193.4229 | 168.9292 | 162.485  | 165.4104 | 147.8079 | 121.0545 | 369.4212 | 460.2956 | 398.824  | -0.93508 | 2.34E-07 | -1.20445 | 5.51E-11 | 0.255301 | 0.424257 |
| ATZG41312 | ATZG41312 | 91.42648 | 1.784246 | 12.87654 | 4.124156 | 5.299738 | 6.977885 | 5.335821 | 3.23667  | 6        |          |          |          |          |          |          |          |          |          |

|           |           |          |          |          |          |          |          |          |          |          |           |          |          |          |          |           |          |           |          |
|-----------|-----------|----------|----------|----------|----------|----------|----------|----------|----------|----------|-----------|----------|----------|----------|----------|-----------|----------|-----------|----------|
| AT2G41750 | AT2G41750 | 57.06739 | 64.23286 | 68.24568 | 30.93117 | 28.48609 | 42.86415 | 35.57214 | 26.97225 | 35.14486 | 76.76285  | 70.5077  | 58.01077 | -0.87401 | 0.001026 | -0.89513  | 0.001617 | 0.115927  | 0.849161 |
| AT2G41760 | AT2G41760 | 180.7134 | 157.0137 | 203.4494 | 130.3233 | 159.6546 | 179.4313 | 137.842  | 116.5201 | 168.8906 | 177.5141  | 171.6131 | 168.8528 | -0.21879 | 0.034964 | -0.3492   | 0.118603 | -0.06718  | 0.887188 |
| AT2G41770 | AT2G41770 | 347.16   | 265.8527 | 278.1333 | 183.5249 | 211.3271 | 227.2797 | 202.7612 | 187.7268 | 178.6563 | 306.0919  | 323.2712 | 241.3662 | -0.52091 | 0.002374 | -0.63475  | 0.000024 | -0.04047  | 0.928400 |
| AT2G41780 | AT2G41780 | 26.15589 | 10.70548 | 18.02716 | 26.80701 | 13.91181 | 16.94629 | 12.45025 | 21.5778  | 27.33489 | 13.4335   | 9.312338 | 4.143626 | 0.061599 | 0.919901 | 0.106802  | 0.867503 | -0.85245  | 0.256107 |
| AT2G41790 | PXM16     | 992.7348 | 983.1196 | 861.4408 | 867.7224 | 798.9355 | 1004.816 | 1035.149 | 1087.521 | 707.7783 | 875.0965  | 884.6721 | 866.0179 | -0.08628 | 0.68839  | -0.0032   | 0.989471 | -0.10925  | 0.764095 |
| AT2G41800 | AT2G41800 | 5.94452  | 1.784246 | 6.438272 | 6.598649 | 3.974804 | 5.981045 | 2.23259  | 23.73558 | 29.7778  | 4.979678  | 0        | 0        | 0.091226 | 0.901523 | 1.937347  | 0.000159 | -0.83647  | NA       |
| AT2G41810 | AT2G41810 | 1.188904 | 0        | 2.575309 | 2.062078 | 2.649869 | 0.996841 | 2.66791  | 2.15778  | 3.904984 | 0.959536  | 2.660668 | 0        | 0.23102  | 0.177188 | 0.538512  | 0.477878 | -0.10643  | NA       |
| AT2G41820 | PXC3      | 650.3305 | 372.9074 | 418.4877 | 148.5057 | 148.3927 | 199.3827 | 174.3035 | 219.3857 | 133.7457 | 354.0686  | 363.1812 | 427.8294 | -0.15102 | 1.12-112 | -1.54369  | 5.42E-13 | -0.3258   | 0.381641 |
| AT2G41830 | AT2G41830 | 129.5905 | 119.5445 | 96.57408 | 53.61402 | 43.06037 | 92.70619 | 72.03358 | 73.36452 | 38.07359 | 100.5712  | 91.79304 | 90.12387 | -0.83906 | 0.005807 | -0.85672  | 0.005844 | -0.27124  | 0.631994 |
| AT2G41835 | SAP11     | 67.76752 | 66.0171  | 56.65679 | 134.4475 | 129.8436 | 138.5609 | 129.8383 | 125.1512 | 136.6744 | 53.734    | 65.18636 | 55.93895 | 1.051857 | 6.93E-08 | 1.013043  | 4.83E-07 | -0.12848  | 0.792895 |
| AT2G41840 | RP52C     | 4547.558 | 4464.184 | 4703.801 | 4694.939 | 4665.757 | 4827.7   | 3637.251 | 3931.475 | 4763.104 | 4591.378  | 3889.897 | 4274.15  | 0.048191 | 0.765396 | -0.15204  | 0.289196 | -0.10337  | 0.675466 |
| AT2G41850 | ADP2G     | 0        | 0        | 9.01358  | 55.26369 | 55.64725 | 36.88311 | 14.22886 | 4.31556  | 3.904984 | 0.959536  | 0        | 1.035907 | 3.0922   | 1.71E-09 | 0.784043  | 0.227433 | -0.798    | NA       |
| AT2G41860 | CPK14     | 0        | 0        | 0        | 0        | 0.662467 | 0        | 0        | 0        | 0        | 0.1919071 | 1.330334 | 0        | 0.095991 | NA       | 0         | NA       | 0.511024  | NA       |
| AT2G41870 | AT2G41870 | 277.0146 | 381.8287 | 334.7901 | 273.4315 | 227.8887 | 212.3271 | 146.7351 | 135.9401 | 180.6055 | 287.8607  | 247.4421 | 367.7468 | -0.45319 | 0.029236 | -1.06285  | 9.52E-08 | -0.12573  | 0.768547 |
| AT2G41880 | GK-1      | 108.1903 | 108.839  | 77.25926 | 124.9619 | 125.8688 | 150.523  | 104.0485 | 116.5201 | 149.3656 | 90.19635  | 67.84703 | 93.23159 | 0.431088 | 0.067841 | -0.32278  | 0.21843  | -0.20495  | 0.654266 |
| AT2G41890 | SD31      | 159.3131 | 167.7191 | 163.5321 | 105.166  | 89.43308 | 143.5451 | 142.8856 | 154.2813 | 105.4346 | 130.4968  | 131.7031 | 147.0987 | -0.53463 | 0.014808 | -0.27776  | 0.269882 | -0.25069  | 0.52541  |
| AT2G41900 | AT2G41900 | 959.4455 | 943.8662 | 874.3173 | 659.0041 | 613.4447 | 814.4189 | 758.5759 | 856.6386 | 483.2418 | 815.6053  | 657.185  | 776.9299 | -0.40295 | 0.058081 | -0.39366  | 0.075635 | -0.29453  | 0.390087 |
| AT2G41905 | AT2G41905 | 7.133424 | 1.28972  | 11.58889 | 31.34358 | 27.82363 | 26.9147  | 41.79726 | 31.28781 | 72.2422  | 23.98839  | 18.62468 | 20.71813 | 1.264732 | 0.001938 | 0.956096  | 6.24E-07 | 0.862744  | 0.181131 |
| AT2G41910 | AT2G41910 | 0        | 0        | 0        | 0.412416 | 0        | 0        | 0.889303 | 0        | 0        | 0         | 0        | 0        | 0.066991 | NA       | 0.136991  | NA       | 0         | NA       |
| AT2G41920 | AT2G41920 | 0        | 0        | 0        | 0        | 0        | 0        | 0        | 0        | 0        | 0         | 0        | 0        | #N/A     | #N/A     | #N/A      | #N/A     | #N/A      | #N/A     |
| AT2G41930 | AT2G41930 | 0        | 0        | 0        | 0        | 0        | 0        | 0        | 0        | 0.959536 | 2.660668  | 0        | 0        | 0.008588 | 0.975625 | -0.69309  | 0.000772 | -0.544752 | NA       |
| AT2G41940 | ZFP8      | 316.2484 | 317.5958 | 217.6136 | 314.2607 | 290.8231 | 246.2197 | 179.6393 | 184.4902 | 154.2469 | 190.9476  | 274.0488 | 219.6122 | 0.008588 | 0.975625 | -0.69309  | 0.000772 | -0.544752 | NA       |
| AT2G41945 | AT2G41945 | 46.36725 | 74.93833 | 65.67037 | 144.7579 | 142.4305 | 110.6493 | 93.37687 | 94.94231 | 120.0783 | 67.16749  | 65.18636 | 52.83123 | 1.079484 | 2.82E-06 | 0.711371  | 0.004704 | 0.003131  | 0.996482 |
| AT2G41950 | AT2G41950 | 184.2801 | 217.678  | 197.0111 | 149.7069 | 164.9544 | 137.564  | 138.7313 | 117.599  | 156.1994 | 263.8723  | 227.4871 | 257.9407 | -0.38674 | 0.028411 | -0.51767  | 0.004274 | 0.327672  | 0.21385  |
| AT2G41960 | AT2G41960 | 590.8853 | 501.3731 | 436.5148 | 317.9724 | 337.8583 | 339.9227 | 385.0684 | 449.8971 | 330.7559 | 456.5887  | 518.8302 | 404.0035 | -0.61141 | 9.24E-05 | -0.32278  | 0.059157 | -0.17098  | 0.565333 |
| AT2G41970 | AT2G41970 | 0        | 0        | 0        | 0        | 0        | 0        | 0        | 1.07889  | 0        | 0.959536  | 2.660668 | 0        | 0        | NA       | 0.171049  | NA       | 0         | 0.543664 |
| AT2G41980 | SINAT1    | 192.6024 | 249.7944 | 218.9012 | 189.2987 | 172.2415 | 186.4092 | 218.7687 | 226.5669 | 168.8906 | 246.6007  | 235.4691 | 199.93   | -0.25709 | 0.183867 | -0.05663  | 0.681109 | 0.051458  | 0.905663 |
| AT2G41990 | AT2G41990 | 21.40027 | 8.92123  | 19.31482 | 12.37247 | 9.274542 | 18.93997 | 11.56095 | 16.18335 | 20.50117 | 27.82653  | 22.61568 | 23.82855 | -0.3374  | 0.488644 | -0.08222  | 0.890464 | 0.482846  | 0.512425 |
| AT2G41997 | LCR51     | 0        | 0        | 0        | 0        | 0        | 0        | 0        | 0        | 0        | 0         | 0        | 0        | #N/A     | #N/A     | #N/A      | #N/A     | #N/A      | #N/A     |
| AT2G42000 | AT2G42000 | 0        | 0        | 0        | 0        | 0        | 0        | 0        | 0        | 0        | 0         | 0        | 0        | #N/A     | #N/A     | #N/A      | #N/A     | #N/A      | #N/A     |
| AT2G42005 | AT2G42005 | 0        | 0        | 1.287654 | 0.412416 | 1.987402 | 0        | 0.889303 | 1.07889  | 2.928738 | 3.838143  | 0        | 3.10772  | 0.104346 | 0.89624  | 0.46693   | 0.517345 | 0.720738  | NA       |
| AT2G42010 | PLDBETA1  | 235.403  | 185.5616 | 198.2588 | 160.0172 | 151.705  | 159.4945 | 188.5323 | 234.1191 | 164.0093 | 160.2424  | 190.2378 | 169.8887 | -0.39236 | 0.036694 | -0.08572  | 0.725426 | -0.2565   | 0.418001 |
| AT2G42020 | AT2G42020 | 0        | 0        | 0        | 0        | 0        | 0        | 0        | 0        | 0        | 0         | 0        | 0        | #N/A     | #N/A     | #N/A      | #N/A     | #N/A      | #N/A     |
| AT2G42030 | AT2G42030 | 260.37   | 251.5787 | 207.3123 | 194.2477 | 187.4782 | 209.3366 | 175.1928 | 213.6202 | 228.4416 | 210.1383  | 222.1658 | 203.0377 | -0.28018 | 0.110698 | -0.21733  | 0.2628   | -0.17592  | 0.571787 |
| AT2G42040 | AT2G42040 | 215.1916 | 253.3629 | 220.1889 | 159.1924 | 135.8058 | 149.5261 | 98.71269 | 122.9935 | 188.4155 | 231.2481  | 214.1838 | 233.079  | -0.60625 | 0.00517  | -0.72148  | 0.001093 | -0.01521  | 0.981084 |
| AT2G42050 | AT2G42050 | 0        | 0        | 0        | 0        | 0        | 0        | 0        | 1.07889  | 0        | 0         | 0        | 0        | 0        | NA       | 0.16673   | NA       | 0         | NA       |
| AT2G42060 | AT2G42060 | 0        | 0        | 0        | 1.649662 | 1.987402 | 0        | 0        | 1.07889  | 0.976246 | 0         | 1.330334 | 0        | 0.629119 | NA       | 0.316823  | NA       | 0.181785  | NA       |
| AT2G42070 | NUD23     | 319.8152 | 365.7704 | 329.6395 | 249.5114 | 289.4982 | 268.1502 | 298.806  | 263.2491 | 324.1137 | 274.4272  | 266.0668 | 369.8186 | -0.32312 | 0.070254 | -0.18768  | 0.356536 | -0.14829  | 0.654834 |
| AT2G42080 | AT2G42080 | 71.33424 | 74.93833 | 100.437  | 130.3233 | 121.2315 | 111.6462 | 103.1592 | 94.94231 | 104.5833 | 102.6703  | 77.15937 | 118.0933 | 0.543198 | 0.014931 | 0.280456  | 0.28555  | 0.267956  | 0.512425 |
| AT2G42090 | ACT9      | 1.188904 | 0        | 0        | 0.412416 | 0.662467 | 0.996841 | 0.889303 | 1.07889  | 0        | 1.330334  | 1.035907 | 0        | 0.10758  | NA       | 0.10638   | NA       | 0.157337  | NA       |
| AT2G42100 | ACT5      | 0        | 0        | 1.287654 | 0.412416 | 0        | 0        | 0.889303 | 0        | 0.976246 | 0         | 1.330334 | 1.035907 | -0.21466 | NA       | 0.102878  | NA       | 0.157479  | NA       |
| AT2G42110 | AT2G42110 | 4.755616 | 1.784246 | 12.87654 | 14.02213 | 13.24935 | 10.96525 | 11.56095 | 11.86779 | 10.73871 | 3.838143  | 5.321336 | 11.39497 | 0.738887 | 0.177591 | 0.579276  | 0.342475 | 0.00735   | NA       |
| AT2G42120 | POLD2     | 104.6235 | 66.0171  | 103.0123 | 104.7536 | 90.75802 | 102.6746 | 90.78086 | 74.44341 | 71.26596 | 89.23689  | 89.13238 | 104.6266 | 0.100254 | 0.718129 | -0.22149  | 0.423351 | 0.027428  | 0.964915 |
| AT2G42130 | PAP13     | 634.8747 | 270.8354 | 754.5654 | 700.6941 | 753.8878 | 687.8201 | 956.8905 | 796.2208 | 922.5528 | 912.5184  | 945.8675 | 895.3202 | 0.023456 | 0.889557 | 0.31565   | 0.008174 | 0.380849  | 0.018268 |
| AT2G42140 | VQ17      | 0        | 0        | 1.287654 | 0.649662 | 0.662467 | 1.993682 | 0        | 2.15778  | 1.952492 | 0         | 0        | 1.035907 | 0.455088 | 0.495216 | -0.394668 | 0.572286 | -0.07407  | NA       |
| AT2G42150 | AT2G42150 | 5.94452  | 5.352738 | 3.862963 | 2.474493 | 1.987402 | 2.990522 | 0.889303 | 2.15778  | 1.952492 | 4.797678  | 3.991002 | 7.251346 | -0.68479 | 0.302598 | -0.95601  | 0.163836 | -0.09093  | NA       |
| AT2G42160 | BRIZ1     | 206.8693 | 198.0513 | 199.5864 | 260.6466 | 205.3649 | 231.2671 | 241.0012 | 240.5925 | 227.4653 | 214.936   | 222.1658 | 225.8276 | 0.206822 | 0.226538 | 0.2247    | 0.21459  | 0.128555  | 0.685051 |
| AT2G42170 | AT2G42170 | 95.11232 | 133.8185 | 106.8753 | 38.35465 | 44.38531 | 46.85152 | 57.80473 | 87.39009 | 77.12343 | 143.9303  | 110.4177 | 135.7038 | -1.32331 | 5.23E-09 | -0.56642  | 0.022414 | 0.230607  | 0.587462 |
| AT2G42180 | AT2G42180 | 0        | 1.784246 | 0        | 0        | 0.662467 | 0        | 0        | 0        | 0        | 0         | 0        | 0        | -0.12017 | NA       | -0.24312  | NA       | -0.23848  | NA       |
| AT2G42190 | AT2G42190 | 689.5643 | 633.4073 | 616.7864 | 630.9958 | 929.4416 | 605.0824 | 585.1617 | 474.7116 | 1057.274 | 753.2355  | 1011.054 | 804.8994 | 0.151238 | 0.64155  | 0.120146  | 0.713736 | 0.385192  | 0.38553  |
| AT2G42200 | SPL9      | 141.4796 | 130.25   | 132.6284 | 76.7093  | 83.47088 | 66.78833 | 76.4801  | 78.75897 | 54.66978 | 133.3755  | 126.3817 | 150.2064 | -0.80391 | 4.39E-05 | -0.92121  | 7.79E-06 | 0.020433  | 0.971051 |
| AT2G42210 | OE1P6     | 689.5643 | 713.6984 | 75.1679  | 962.9904 | 942.0285 | 790.4947 | 749.6828 | 611.7306 | 1033.845 | 863.5812  | 925.9124 | 932.3159 | 0.30184  | 0.124488 | 0.134157  | 0.165179 | 0.136675  | 0.286759 |
| AT2G42220 | STR9      | 4331.177 | 5044.064 | 5245.904 | 2586.258 | 2956.591 | 2703.432 | 2909.864 | 2107.072 | 1979.827 | 5411.781  | 5152.383 | 5184.712 | -0.18188 | 5.67E-14 | -1.18563  |          |           |          |

|           |           |          |          |          |          |          |          |          |          |          |          |          |          |          |          |          |           |          |          |
|-----------|-----------|----------|----------|----------|----------|----------|----------|----------|----------|----------|----------|----------|----------|----------|----------|----------|-----------|----------|----------|
| AT2G42700 | MIP3      | 150.9908 | 180.2088 | 130.0531 | 155.8931 | 133.8184 | 183.4187 | 190.3109 | 201.7524 | 103.4821 | 157.3638 | 160.9704 | 134.6678 | 0.036834 | 0.913943 | 0.10473  | 0.756893  | -0.02    | 0.978296 |
| AT2G42710 | AT2G42710 | 249.6698 | 180.2088 | 230.4901 | 237.9638 | 248.4252 | 278.1186 | 222.3259 | 250.3025 | 262.6102 | 247.5629 | 283.3611 | 219.1221 | 0.19076  | 0.526057 | 0.13969  | 0.520357  | 0.165819 | 0.618027 |
| AT2G42720 | AT2G42720 | 2.377808 | 1.784246 | 5.150617 | 0.824831 | 0.662467 | 0.996841 | 1.778899 | 0        | 6.716749 | 2.660668 | 9.323159 | -0.95105 | 0.316623 | -0.78482 | 0.276724 | 0.710783  | NA       | NA       |
| AT2G42730 | AT2G42730 | 86.78999 | 58.88012 | 82.40988 | 65.98649 | 51.67245 | 42.86415 | 61.36194 | 52.86561 | 48.8123  | 74.84378 | 89.13238 | 73.54936 | -0.47375 | 0.073203 | -0.47626 | 0.093686  | 0.034141 | 0.960703 |
| AT2G42740 | RP11A     | 181.9023 | 153.4452 | 243.3667 | 181.4629 | 202.715  | 165.4756 | 107.6057 | 121.9146 | 167.9143 | 199.5834 | 199.5501 | 192.6786 | -0.07649 | 0.780329 | -0.53349 | 0.019732  | 0.023798 | 0.968213 |
| AT2G42750 | AT2G42750 | 1803.567 | 2412.301 | 2110.465 | 1094.551 | 1123.544 | 1047.68  | 1098.29  | 1091.837 | 904.0038 | 2390.203 | 2568.875 | 1947.504 | -0.93703 | 1.8E-10  | -1.0139  | 5.49E-12  | 0.126519 | 0.861525 |
| AT2G42760 | AT2G42760 | 153.3686 | 92.78079 | 114.6012 | 132.3854 | 131.1685 | 158.4977 | 111.1629 | 108.9679 | 238.204  | 112.2657 | 86.47171 | 113.9497 | 0.200978 | 0.570746 | 0.316644 | 0.37089   | -0.0181  | 0.750853 |
| AT2G42770 | AT2G42770 | 454.1613 | 472.8252 | 488.021  | 435.0984 | 476.9764 | 458.5468 | 514.0174 | 441.266  | 564.2702 | 522.9469 | 538.7853 | 386.3931 | -0.04594 | 0.828401 | 0.10233  | 0.612538  | 0.193173 | 0.940496 |
| AT2G42780 | AT2G42780 | 36.85602 | 39.25341 | 55.36914 | 47.42779 | 43.06037 | 63.79781 | 47.13308 | 53.9445  | 38.07359 | 49.89585 | 25.27635 | 40.40035 | 0.196575 | 0.592168 | 0.069511 | 0.875381  | -0.15709 | 0.825918 |
| AT2G42790 | CSY3      | 424.4387 | 549.5478 | 585.8827 | 798.0241 | 903.6054 | 796.4758 | 803.041  | 918.1353 | 773.1868 | 492.2418 | 436.3495 | 448.5475 | 0.67234  | 4.42E-06 | 0.669298 | 6.43E-06  | -0.17265 | 0.54288  |
| AT2G42800 | AIRLP29   | 80.84547 | 55.31163 | 52.79383 | 32.16841 | 35.77323 | 37.87995 | 25.7898  | 25.89336 | 28.31113 | 63.23935 | 42.57069 | 69.40574 | -0.81542 | 0.003906 | -1.17333 | 7.59E-05  | -0.09953 | 0.879636 |
| AT2G42810 | PAPP5     | 441.0834 | 474.6094 | 485.4457 | 397.5686 | 393.5056 | 457.5499 | 465.1057 | 496.2894 | 404.1658 | 337.7565 | 321.9408 | 304.8132 | -0.16787 | 0.263999 | -0.036   | 0.851217  | -0.47706 | 0.005903 |
| AT2G42820 | HVA227    | 2.377808 | 5.352738 | 9.01358  | 8.248311 | 10.59948 | 7.94726  | 12.45025 | 5.39445  | 5.857476 | 13.37355 | 7.982004 | 6.215439 | 0.506888 | 0.406555 | 0.375274 | 0.583657  | 0.545186 | NA       |
| AT2G42830 | AGL5      | 0        | 0        | 1.287654 | 0.824831 | 0        | 1.993682 | 0        | 0        | 2.878607 | 0        | 0        | 1.035907 | 0.210637 | NA       | -0.27293 | NA        | 0.390706 | NA       |
| AT2G42835 | AT2G42835 | 0        | 0        | 0        | 0        | 0        | 0        | 0.889303 | 0        | 0.976246 | 0        | 0        | 1.035907 | 0        | NA       | 0.330786 | NA        | 0.182304 | NA       |
| AT2G42840 | PDF1      | 880.9778 | 758.3046 | 777.7432 | 1160.537 | 1192.441 | 1248.045 | 880.4104 | 927.8453 | 836.6428 | 892.3681 | 856.7351 | 728.2423 | 0.566189 | 2.05E-06 | 0.125875 | 0.404985  | 0.032482 | 0.917771 |
| AT2G42850 | CYP718    | 10.70014 | 5.352738 | 9.01358  | 4.124156 | 1.987402 | 4.984204 | 2.66791  | 0        | 1.952492 | 0.995936 | 1.330334 | 2.071813 | -0.85786 | 0.176836 | -1.51788 | 0.016171  | -1.55471 | NA       |
| AT2G42860 | AT2G42860 | 14.26685 | 7.136984 | 9.01358  | 7.835896 | 8.612075 | 4.984204 | 7.114428 | 6.47334  | 15.61994 | 9.595356 | 6.65167  | 6.215439 | -0.40185 | 0.496336 | -0.06645 | 0.927468  | -0.35688 | NA       |
| AT2G42870 | PAR1      | 29.72226 | 19.62671 | 33.47901 | 27.63184 | 19.87402 | 13.95577 | 18.67537 | 14.02557 | 47.83605 | 23.02886 | 21.28534 | 95.93865 | -0.35341 | 0.510338 | -0.0438  | 0.946928  | 0.229103 | 0.81941  |
| AT2G42880 | MPK20     | 1154.426 | 1088.39  | 999.2198 | 635.5324 | 527.3239 | 741.6495 | 708.7749 | 730.4085 | 419.7858 | 1037.258 | 1306.388 | 950.9622 | -0.74488 | 0.000506 | -0.77721 | 0.000338  | 0.021662 | 0.971556 |
| AT2G42885 | AT2G42885 | 1.188904 | 0        | 0        | 0        | 0        | 0        | 1.07889  | 0        | 0        | 0        | 0        | 2.071813 | -0.24397 | NA       | -0.03439 | NA        | 0.124938 | NA       |
| AT2G42890 | ML2       | 315.0595 | 274.7739 | 254.9556 | 212.8064 | 191.453  | 272.1375 | 281.0199 | 257.8547 | 223.5603 | 168.8783 | 179.5951 | 178.1759 | -0.32512 | 0.08452  | -0.14579 | 0.512653  | -0.66943 | 0.002872 |
| AT2G42900 | AT2G42900 | 24.96698 | 33.90067 | 28.3284  | 12.78488 | 11.26194 | 14.95261 | 23.12189 | 20.49891 | 37.09735 | 40.3005  | 35.91902 | 33.14901 | -1.05458 | 0.003202 | -0.08162 | 0.868338  | 0.325444 | 0.612836 |
| AT2G42910 | PRS4      | 363.8046 | 308.6746 | 352.8173 | 251.5735 | 269.6242 | 294.068  | 23.8868  | 272.9592 | 323.1374 | 296.4965 | 247.4421 | 289.0179 | -0.33431 | 0.051116 | -0.30491 | 0.095684  | -0.2948  | 0.26805  |
| AT2G42920 | PCMP-75   | 174.8574 | 114.1917 | 106.8753 | 44.54088 | 30.47349 | 78.75042 | 80.92662 | 77.68008 | 46.85981 | 146.809  | 129.0424 | 130.5242 | -1.20046 | 4.39E-05 | -0.77947 | 0.1013352 | 0.146092 | 0.825753 |
| AT2G42930 | AT2G42930 | 0        | 0        | 0        | 0        | 0        | 0        | 0        | 0        | 0        | 0        | 0        | 0        | #N/A     | #N/A     | #N/A     | #N/A      | #N/A     | #N/A     |
| AT2G42940 | AHL16     | 0        | 0        | 0        | 0.412416 | 0        | 0.996841 | 0.889303 | 0        | 0        | 0.959536 | 0        | 3.10772  | 0.203616 | NA       | 0.139625 | NA        | 0.647709 | NA       |
| AT2G42950 | AT2G42950 | 84.41218 | 76.72258 | 87.5605  | 144.7579 | 136.4683 | 141.5514 | 141.3993 | 138.0979 | 98.60085 | 85.39867 | 86.47171 | 78.7289  | 0.739228 | 0.000257 | 0.579932 | 0.007782  | 0.001539 | 0.997839 |
| AT2G42955 | AT2G42955 | 4.755616 | 40.70648 | 3.862963 | 3.71174  | 3.974804 | 1.993682 | 3.53821  | 5.5223   | 5.857476 | 1.919071 | 3.991002 | 5.179533 | -0.61476 | 0.339971 | 0.028606 | 0.972196  | -0.50685 | NA       |
| AT2G42960 | AT2G42960 | 58.25629 | 44.60515 | 30.9037  | 28.86999 | 32.4609  | 29.90522 | 42.68657 | 36.68226 | 28.31113 | 40.3005  | 31.92802 | 60.08258 | -0.51949 | 0.132885 | -0.2912  | 0.467849  | -0.00726 | 0.993182 |
| AT2G42970 | AT2G42970 | 0        | 0        | 0        | 0        | 0        | 0        | 1.07889  | 0        | 0        | 0        | 0        | 0        | #N/A     | #N/A     | #N/A     | #N/A      | #N/A     | #N/A     |
| AT2G42975 | AT2G42975 | 122.4571 | 164.1506 | 130.0531 | 75.05963 | 64.92179 | 47.84836 | 54.24751 | 40.99782 | 49.78855 | 171.7569 | 204.8714 | 120.1652 | -1.0692  | 1.31E-05 | -1.43423 | 1.5E-08   | 0.24938  | 0.589724 |
| AT2G42980 | AT2G42980 | 14.26685 | 16.05821 | 15.45185 | 5.361402 | 7.949607 | 9.968408 | 10.61764 | 6.47334  | 6.837722 | 22.06932 | 14.63367 | 8.28752  | -0.85659 | 0.082226 | -0.74862 | 0.165223  | -0.00111 | NA       |
| AT2G42990 | AT2G42990 | 17.83356 | 21.41905 | 16.39861 | 11.13522 | 1.993682 | 8.003731 | 7.55223  | 9.228738 | 34.54328 | 34.54328 | 27.93701 | 22.78994 | -1.23046 | 0.007708 | -1.25802 | 0.014563  | 0.55385  | NA       |
| AT2G43000 | JUB1      | 5.94452  | 8.92123  | 6.438272 | 83.30795 | 72.20893 | 77.75358 | 74.70149 | 80.91675 | 53.69353 | 6.716749 | 1.330334 | 3.10772  | 3.084288 | 2.38E-17 | 2.92106  | 2.57E-15  | -0.56411 | 0.519392 |
| AT2G43010 | PIF4      | 2073.448 | 2237.445 | 2219.916 | 1137.855 | 942.0285 | 1160.323 | 1121.412 | 1190.016 | 818.094  | 2364.296 | 2387.949 | 1992.048 | -0.99371 | 8.64E-11 | -1.04272 | 1.1E-11   | 0.045765 | 0.907091 |
| AT2G43018 | CPuORF17  | 0        | 0        | 0        | 0        | 0        | 0        | 0        | 0        | 0        | 0        | 0        | 0        | #N/A     | #N/A     | #N/A     | #N/A      | #N/A     | #N/A     |
| AT2G43020 | PAO2      | 0        | 0        | 0        | 0        | 0        | 0        | 0        | 0        | 0        | 0        | 0        | 0        | #N/A     | #N/A     | #N/A     | #N/A      | #N/A     | #N/A     |
| AT2G43030 | RPL3A     | 3636.857 | 3896.793 | 4048.385 | 2474.493 | 2714.791 | 2612.72  | 3254.851 | 3472.947 | 4213.478 | 4125.044 | 3558.643 | 4426.429 | -0.56323 | 1.95E-05 | -0.08104 | 0.644368  | 0.064085 | 0.836113 |
| AT2G43040 | NP61      | 36.85602 | 35.68492 | 30.9037  | 30.10634 | 30.47349 | 29.90522 | 23.12189 | 22.65669 | 27.34849 | 35.50282 | 39.91002 | 41.43626 | -0.17884 | 0.620132 | -0.46403 | 0.194551  | 0.165721 | 0.799703 |
| AT2G43050 | PME16     | 1.188904 | 0        | 1.287654 | 2.474493 | 3.312336 | 0.996841 | 1.07889  | 0        | 0        | 1.330334 | 1.035907 | 0        | 0.558996 | 0.430873 | 0.514242 | 0.491043  | -0.09057 | NA       |
| AT2G43060 | IBH1      | 68.95643 | 94.56504 | 88.84815 | 85.78244 | 94.07035 | 88.71883 | 79.14801 | 60.41784 | 83.95716 | 94.99403 | 85.14137 | 66.29802 | 0.097337 | 0.738538 | -0.15247 | 0.616201  | -0.02084 | 0.975875 |
| AT2G43070 | SP13      | 388.7716 | 378.2602 | 369.5568 | 386.4334 | 412.7171 | 380.7932 | 442.8731 | 406.7415 | 330.9474 | 353.1091 | 304.6465 | 412.2908 | 0.05335  | 0.796758 | 0.054209 | 0.808584  | -0.08231 | 0.818544 |
| AT2G43080 | PAH1      | 91.5456  | 112.4075 | 176.4086 | 272.1943 | 253.0625 | 217.3113 | 224.1045 | 227.6458 | 195.2492 | 150.6471 | 107.7571 | 151.2424 | 0.932246 | 3.83E-05 | 0.734821 | 0.002059  | 0.105835 | 0.848956 |
| AT2G43090 | AT2G43090 | 1039.102 | 90.2565  | 991.4938 | 1095.788 | 1269.287 | 990.8597 | 996.9092 | 972.0798 | 1377.483 | 996.9755 | 1172.024 | 96.4239  | 0.149474 | 0.445084 | 0.144713 | 0.438311  | 0.053993 | 0.900371 |
| AT2G43100 | IPM12     | 613.4744 | 388.9656 | 432.4519 | 295.9392 | 284.8609 | 249.2102 | 216.1007 | 226.5669 | 283.1113 | 672.6345 | 703.7467 | 523.1328 | -0.76803 | 0.001004 | -0.96068 | 1.28E-11  | 0.388861 | 0.903131 |
| AT2G43110 | AT2G43110 | 91.5456  | 83.85956 | 108.163  | 116.3012 | 103.3449 | 90.71251 | 94.26617 | 80.91675 | 125.9357 | 111.3061 | 94.45371 | 109.8061 | 0.130878 | 0.63218  | 0.078657 | 0.803773  | 0.146721 | 0.760003 |
| AT2G43120 | AT2G43120 | 79.6556  | 66.0171  | 77.25926 | 89.9418  | 100.695  | 90.71251 | 125.9319 | 118.6779 | 183.524  | 114.847  | 97.11438 | 96.33931 | 0.308331 | 0.227492 | 0.897804 | 8.33E-05  | 0.439538 | 0.233965 |
| AT2G43130 | RABA5C    | 148.613  | 167.7191 | 173.8333 | 216.1058 | 221.2641 | 169.4629 | 220.5473 | 180.1746 | 159.1281 | 146.809  | 106.4267 | 179.2118 | 0.307114 | 0.192662 | 0.189467 | 0.831692  | -0.1648  | 0.713306 |
| AT2G43137 | AT2G43137 | 1.188904 | 0        | 1.287654 | 0        | 0        | 1.07889  | 0.976246 | 0        | 0        | 0        | 0        | 3.10772  | -0.51555 | NA       | -0.08075 | NA        | 0.091648 | NA       |
| AT2G43138 | AT2G43138 | 0        | 1.784246 | 0        | 0.412416 | 2.649869 | 0        | 0        | 0        | 0        | 1.919071 | 1.330334 | 1.035907 | 0.270704 | NA       | -0.31874 | NA        | 0.407811 | NA       |
| AT2G43139 | AT2G43139 | 1.188904 | 1.784246 | 0        | 0.412416 | 1.987402 | 0        | 0.889303 | 1.07889  | 0        | 0.959536 | 1.330334 |          |          |          |          |           |          |          |

|           |           |          |          |          |          |          |          |          |          |          |          |          |          |          |           |          |           |          |          |
|-----------|-----------|----------|----------|----------|----------|----------|----------|----------|----------|----------|----------|----------|----------|----------|-----------|----------|-----------|----------|----------|
| ATZG43590 | ATZG43590 | 13.07794 | 30.33218 | 14.1642  | 42.4788  | 37.09817 | 41.86731 | 102.2699 | 112.2046 | 142.5319 | 7.676285 | 5.321336 | 15.5386  | 1.038332 | 0.00243   | 2.522573 | 6.05E-16  | -0.76412 | 0.219079 |
| ATZG43600 | ATZG43600 | 0        | 0        | 0        | 0.412164 | 0.662467 | 0        | 0.889303 | 0        | 0        | 0        | 0        | 0        | 0.208167 | NA        | 0.156588 | NA        | 0        | NA       |
| ATZG43610 | ATZG43610 | 5.94452  | 3.568492 | 9.01358  | 15.25938 | 11.26194 | 8.971567 | 10.67164 | 11.86779 | 11.71495 | 6.716749 | 9.312338 | 9.323159 | 0.746689 | 0.155688  | 0.65501  | 0.255829  | 0.28848  | NA       |
| ATZG43620 | ATZG43620 | 17.83356 | 7.136984 | 10.30123 | 87.01969 | 64.25933 | 77.75358 | 43.57587 | 56.10228 | 41.00233 | 8.635821 | 6.65167  | 14.50269 | 2.410443 | 1.18E-12  | 1.722902 | 1.67E-06  | -0.24425 | 0.78583  |
| ATZG43630 | ATZG43630 | 299.6038 | 305.1061 | 339.9407 | 359.6264 | 340.5082 | 329.9543 | 391.2935 | 330.1403 | 416.857  | 363.664  | 375.1542 | 433.0089 | 0.124743 | 0.473814  | 0.265581 | 0.107917  | 0.305811 | 0.178439 |
| ATZG43640 | SRP14     | 146.2352 | 181.9931 | 187.9975 | 269.3074 | 307.3848 | 225.286  | 211.6542 | 208.2258 | 326.0662 | 194.7857 | 220.8354 | 187.4991 | 0.622814 | 0.004204  | 0.517647 | 0.0042826 | 0.217614 | 0.597926 |
| ATZG43650 | EMB2777   | 393.5272 | 306.8903 | 309.037  | 339.418  | 314.672  | 277.1217 | 335.2674 | 334.4559 | 370.9735 | 284.9821 | 258.0848 | 313.8797 | -0.1133  | 0.552157  | 0.0382   | 0.866696  | -0.23452 | 0.39353  |
| ATZG43660 | ATZG43660 | 1.188904 | 1.784246 | 1.287654 | 0.824831 | 0        | 0        | 0.889303 | 0        | 0.904984 | 2.878607 | 1.330334 | 2.071813 | -0.59407 | 0.384484  | 0.0973   | 0.908949  | 0.278745 | NA       |
| ATZG43670 | ATZG43670 | 0        | 3.568492 | 1.287654 | 1.237247 | 1.324935 | 2.990522 | 1.778607 | 3.23667  | 2.928738 | 0.99536  | 1.330334 | 2.071813 | 0.095567 | 0.910396  | 0.416695 | 0.596051  | -0.01034 | NA       |
| ATZG43680 | IQD14     | 2453.898 | 2071.51  | 1823.319 | 1492.12  | 1297.773 | 1493.267 | 1523.377 | 1894.531 | 1292.55  | 1658.078 | 1813.245 | 1477.203 | -0.55707 | 0.001149  | -0.42288 | 0.019532  | -0.3532  | 0.175409 |
| ATZG43690 | LECRK53   | 17.83356 | 19.62671 | 14.1642  | 6.598649 | 6.624673 | 7.974726 | 8.003731 | 9.710009 | 9.76246  | 9.59536  | 19.95501 | 16.5745  | -1.10096 | 0.014823  | -0.766   | 0.126187  | -0.1483  | NA       |
| ATZG43700 | LECRK54   | 19.02246 | 23.1952  | 19.31482 | 15.67179 | 15.23675 | 18.93997 | 18.67537 | 16.18335 | 18.54867 | 17.27164 | 18.62468 | 20.71813 | -0.27935 | 0.521701  | -0.16602 | 0.744944  | -0.09446 | 0.920768 |
| ATZG43710 | FAB2      | 1663.277 | 1381.006 | 1400.968 | 937.4206 | 946.6657 | 804.4505 | 991.5734 | 836.1397 | 836.6428 | 1303.409 | 1599.061 | 1282.452 | -0.71439 | 0.431E-07 | -0.72832 | 3.23E-07  | -0.08832 | 0.777751 |
| ATZG43720 | ATZG43720 | 29.7226  | 12.48972 | 24.46543 | 42.89122 | 41.07297 | 31.8989  | 41.79726 | 29.13003 | 51.74104 | 39.34096 | 39.91002 | 45.57989 | 0.697238 | 0.044081  | 0.761465 | 0.035148  | 0.780148 | 0.115581 |
| ATZG43730 | JAL24     | 0        | 0        | 0        | 0.412164 | 0.662467 | 0        | 0.889303 | 0        | 0.976246 | 0        | 0        | 0        | 0.222449 | NA        | 0.350665 | NA        | 0        | NA       |
| ATZG43740 | JAL25     | 0        | 0        | 0        | 0        | 0        | 0        | 0        | 0        | 0        | 0        | 0        | 0        | #N/A     | #N/A      | #N/A     | #N/A      | #N/A     | #N/A     |
| ATZG43750 | ATZG43745 | 3.566712 | 3.568492 | 0        | 1.237247 | 1.987402 | 0.996841 | 0        | 1.07889  | 3.904984 | 1.919071 | 5.321336 | 2.071813 | -0.33498 | 0.663587  | -0.22425 | 0.97286   | 0.201686 | NA       |
| ATZG43760 | OASB      | 1907.002 | 1989.434 | 1975.262 | 857.8244 | 775.7492 | 929.0556 | 992.4627 | 1139.308 | 1190.044 | 2126.331 | 1818.567 | 1938.181 | -1.18563 | 2.12E-25  | -0.81389 | 2.65E-12  | 0.003927 | 0.990831 |
| ATZG43770 | MOC52     | 378.0715 | 451.4142 | 486.7333 | 583.9805 | 683.0038 | 575.1771 | 584.2714 | 566.4172 | 644.3224 | 490.3227 | 524.1516 | 429.912  | 0.480422 | 0.001271  | 0.443141 | 0.004151  | 0.132142 | 0.654464 |
| ATZG43780 | ATZG43770 | 279.3924 | 287.2636 | 298.7358 | 230.9527 | 255.0499 | 266.1565 | 273.0162 | 292.3792 | 249.919  | 275.3867 | 309.9678 | 229.9712 | -0.2047  | 0.235321  | -0.08524 | 0.680703  | -0.08896 | 0.794731 |
| ATZG43790 | ATZG43780 | 40.42273 | 44.60615 | 54.08148 | 94.44317 | 84.79581 | 68.78201 | 40.90796 | 47.47116 | 113.2445 | 31.66468 | 41.24035 | 47.6517  | 0.772356 | 0.031464  | 0.486772 | 0.228945  | -0.19112 | 0.80822  |
| ATZG43790 | MPK6      | 825.0993 | 810.0477 | 780.3185 | 609.1378 | 730.7014 | 671.8707 | 743.5577 | 808.0886 | 742.9232 | 713.8945 | 788.888  | 701.3087 | -0.26361 | 0.033333  | -0.07399 | 0.634443  | -0.13261 | 0.506552 |
| ATZG43795 | ATZG43795 | 0        | 0        | 0        | 0        | 0        | 0        | 0        | 0        | 0.976246 | 0        | 0        | 0        | 0        | NA        | 0.16673  | NA        | 0        | NA       |
| ATZG43800 | FH2       | 442.2723 | 206.9725 | 247.2296 | 129.0861 | 157.0047 | 141.5514 | 147.6244 | 182.3324 | 123.9832 | 282.1035 | 313.9588 | 251.7253 | -1.0294  | 3.89E-05  | -0.9426  | 0.000237  | -0.08542 | 0.88731  |
| ATZG43810 | LSM6B     | 279.3924 | 335.4383 | 305.1741 | 493.6614 | 437.8909 | 430.6352 | 345.9391 | 304.247  | 354.3773 | 358.8663 | 365.8418 | 285.9102 | 0.566364 | 0.000175  | 0.131122 | 0.499506  | 0.13653  | 0.654861 |
| ATZG43820 | UGT74F2   | 300.7927 | 351.4965 | 275.558  | 360.4512 | 435.9035 | 478.4836 | 445.5041 | 371.1381 | 418.8095 | 56.77104 | 316.6195 | 295.2334 | 0.449956 | 0.007224  | 0.41264  | 0.018708  | -0.0728  | 0.852822 |
| ATZG43830 | ATZG43830 | 4.755616 | 10.70548 | 6.438272 | 7.701165 | 13.91181 | 4.984204 | 8.893033 | 3.23667  | 4.984204 | 5.672114 | 18.62468 | 10.35907 | 0.227138 | 0.741069  | -0.21738 | 0.773716  | 0.512752 | NA       |
| ATZG43840 | UGT74F1   | 10.70014 | 12.48972 | 9.01358  | 9.485558 | 5.962205 | 4.984204 | 8.003731 | 8.63112  | 11.71495 | 3.838143 | 10.64267 | 6.215439 | -0.46368 | 0.418024  | -0.13105 | 0.852179  | -0.52489 | NA       |
| ATZG43850 | ATZG43850 | 134.3461 | 128.4657 | 146.7926 | 379.0099 | 353.0951 | 375.809  | 305.2074 | 270.8014 | 246.9902 | 106.5085 | 107.7571 | 154.3501 | 1.402306 | 7.85E-17  | 0.98217  | 2.47E-08  | -0.14888 | 0.702132 |
| ATZG43860 | ATZG43860 | 0        | 0        | 0        | 0        | 0        | 0        | 0        | 1.778607 | 0        | 0        | 0.99536  | 0        | 0        | NA        | 0.262373 | NA        | 0.143228 | NA       |
| ATZG43865 | ATZG43865 | 0        | 0        | 1.287654 | 0        | 0        | 0        | 0        | 0        | 0        | 0        | 0        | 0        | -0.2184  | NA        | -0.20558 | NA        | -0.19918 | NA       |
| ATZG43870 | ATZG43870 | 1.188904 | 5.352738 | 2.575309 | 2.474493 | 0.662467 | 2.990522 | 6.225124 | 4.31556  | 2.928738 | 7.676285 | 2.660668 | 5.179533 | -0.32575 | 0.667012  | 0.408007 | 0.597041  | 0.564183 | NA       |
| ATZG43871 | ATZG43871 | 0        | 0        | 0        | 0        | 0        | 0        | 0        | 0        | 0        | 0        | 0        | 0        | #N/A     | #N/A      | #N/A     | #N/A      | #N/A     | #N/A     |
| ATZG43880 | ATZG43880 | 0        | 0        | 0        | 0        | 0.662467 | 0        | 0.889303 | 0        | 0        | 0        | 0        | 0        | 0.097058 | NA        | 0.130384 | NA        | 0        | NA       |
| ATZG43890 | ATZG43890 | 0        | 1.784246 | 0        | 0        | 0        | 0        | 0        | 0        | 0        | 0        | 0        | 0        | -0.2184  | NA        | -0.20558 | NA        | -0.19918 | NA       |
| ATZG43900 | 5PTASE12  | 275.8257 | 299.7533 | 279.421  | 176.5139 | 153.6924 | 182.4219 | 166.2998 | 195.2791 | 146.4369 | 262.9128 | 268.7275 | 272.4434 | -0.72515 | 1.47E-06  | -0.73811 | 2.26E-06  | -0.08402 | 0.805161 |
| ATZG43910 | HOL1      | 727.6092 | 902.8285 | 767.442  | 1184.87  | 1134.806 | 1067.616 | 770.1368 | 706.6729 | 780.0205 | 949.9403 | 1037.66  | 773.8222 | 0.496186 | 0.000489  | -0.08256 | 0.66359   | 0.202677 | 0.414558 |
| ATZG43920 | HOL2      | 65.38972 | 69.58526 | 96.57408 | 43.30364 | 42.39791 | 38.87679 | 31.12562 | 56.10228 | 58.57476 | 71.96517 | 77.15937 | 64.2262  | -0.84565 | 0.001815  | -0.64493 | 0.028264  | -0.11809 | 0.850178 |
| ATZG43930 | ATZG43930 | 2.377808 | 5.352738 | 3.862963 | 5.773818 | 5.962205 | 3.987363 | 8.893033 | 4.31556  | 8.86214  | 6.716749 | 5.321336 | 12.43089 | 0.673997 | 0.305442  | 0.314685 | 0.647341  | 0.794123 | NA       |
| ATZG43932 | ATZG43932 | 0        | 3.568492 | 0        | 1.237247 | 0.662467 | 1.993682 | 0        | 0        | 2.878607 | 2.660668 | 1.035907 | 0        | 0.12657  | 0.871888  | -0.57403 | 0.396674  | 0.462914 | NA       |
| ATZG43940 | HOL3      | 60.6341  | 62.44861 | 57.94445 | 117.5384 | 117.2567 | 97.6904  | 65.80846 | 57.18117 | 77.12343 | 26.867   | 41.24035 | 32.1131  | 0.863763 | 0.000167  | 0.144258 | 0.652906  | -0.82322 | 0.018523 |
| ATZG43945 | ATZG43945 | 1179.393 | 1243.619 | 1277.353 | 804.6228 | 859.2201 | 850.3052 | 1247.693 | 958.0543 | 784.9018 | 1677.268 | 1754.711 | 1553.86  | -0.54831 | 0.000647  | -0.30087 | 0.091736  | 0.422853 | 0.056721 |
| ATZG43950 | PEP37     | 261.5589 | 235.5205 | 233.0654 | 263.946  | 307.3848 | 283.1028 | 277.4627 | 261.0914 | 265.5389 | 254.2769 | 282.0308 | 249.6535 | 0.217532 | 0.162575  | 0.134719 | 0.454217  | 0.097866 | 0.751681 |
| ATZG43960 | ATZG43960 | 0        | 0        | 0        | 0        | 0        | 0        | 0        | 0        | 0        | 0        | 0        | 0        | #N/A     | #N/A      | #N/A     | #N/A      | #N/A     | #N/A     |
| ATZG43970 | LARP6B    | 8236.727 | 8328.86  | 7964.142 | 7437.915 | 6914.171 | 7434.439 | 6548.831 | 7108.806 | 5251.227 | 7422.008 | 8218.803 | 6516.888 | -0.1689  | 0.275388  | -0.37073 | 0.010061  | -0.14501 | 0.571167 |
| ATZG43980 | ITPK4     | 126.0238 | 133.8185 | 124.9025 | 206.2078 | 192.778  | 202.3587 | 208.097  | 201.7524 | 280.6055 | 142.9708 | 179.5951 | 172.9964 | 0.636123 | 0.000126  | 0.60928  | 0.000424  | 0.352425 | 0.188033 |
| ATZG43990 | ATZG43990 | 47.55616 | 32.11643 | 42.49259 | 28.45667 | 31.79843 | 44.85784 | 42.68657 | 51.78672 | 41.97858 | 47.97678 | 47.89202 | 47.6517  | -0.26558 | 0.427619  | 0.12655  | 0.746643  | 0.199334 | 0.74103  |
| ATZG44000 | ATZG44000 | 1.188904 | 1.784246 | 1.287654 | 0.262078 | 1.993682 | 1.778607 | 1.07889  | 0        | 2.878607 | 1.330334 | 1.035907 | 0        | 0.267603 | 0.733478  | -0.20531 | 0.808526  | 0.154195 | NA       |
| ATZG44010 | ATZG44010 | 2.377808 | 0        | 0        | 4.124156 | 8.612075 | 4.984204 | 5.572124 | 2.15778  | 5.857476 | 0        | 0        | 0        | 1.418266 | 0.024999  | 0.954794 | 0.170539  | -0.50082 | NA       |
| ATZG44020 | ATZG44020 | 103.4346 | 99.91778 | 91.42346 | 76.29688 | 92.08295 | 97.6904  | 88.04104 | 97.10009 | 116.1733 | 94.99403 | 94.45371 | 95.3034  | -0.15984 | 0.515537  | 0.02983  | 0.921712  | -0.04776 | 0.930472 |
| ATZG44030 | ATZG44030 | 0        | 0        | 0        | 0        | 0        | 0        | 0        | 0        | 0        | 1.330334 | 1.035907 | 0        | 0        | NA        | 0.91121  | NA        | 0.375122 | NA       |
| ATZG44040 | DAPB1     | 222.325  | 169.5034 | 176.4086 | 127.024  | 133.8184 | 137.564  | 152.0709 | 170.4646 | 217.3209 | 189.9881 | 184.9164 | 208.2172 | -0.51193 | 0.002723  | -0.07948 | 0.755986  | 0.03066  | 0.951963 |
| ATZG44050 | COS1      | 529.0623 | 529.9211 | 525.363  | 452.8323 | 493.5381 | 379.7963 | 393.0721 | 302.0892 | 560.3652 | 554.6116 | 565.3919 | 499.3069 |          |           |          |           |          |          |

|           |           |          |          |          |          |            |          |          |          |          |          |          |          |          |          |           |          |           |          |
|-----------|-----------|----------|----------|----------|----------|------------|----------|----------|----------|----------|----------|----------|----------|----------|----------|-----------|----------|-----------|----------|
| ATZG44510 | ATZG44510 | 93.92341 | 69.5856  | 91.42346 | 113.8267 | 135.1433   | 75.7599  | 96.04478 | 92.78453 | 93.71962 | 81.56053 | 54.54369 | 70.44164 | 0.337596 | 0.218259 | 0.130737  | 0.696756 | -0.29006  | 0.545084 |
| ATZG44520 | COX10     | 139.7913 | 194.4828 | 189.2852 | 200.8464 | 192.1155   | 201.3618 | 183.1965 | 236.2769 | 154.2469 | 183.2719 | 214.1838 | 174.0323 | 0.040741 | 0.866909 | -0.01242  | 0.963111 | -0.01915  | 0.970941 |
| ATZG44525 | ATZG44525 | 159.3131 | 194.4828 | 184.1346 | 244.5624 | 277.5738   | 252.2007 | 274.7948 | 201.7524 | 241.1328 | 239.8839 | 266.0668 | 217.5404 | 0.520341 | 0.002801 | 0.461693  | 0.052836 | 0.421309  | 0.907269 |
| ATZG44530 | PRS5      | 334.082  | 330.0855 | 345.0914 | 332.407  | 358.3948   | 357.8658 | 397.5187 | 362.507  | 388.5459 | 333.9184 | 339.2352 | 314.9156 | 0.050017 | 0.755925 | 0.1848    | 0.202343 | -0.03254  | 0.920201 |
| ATZG44540 | ATGH989   | 0        | 0        | 0        | 0        | 0          | 0        | 0        | 0        | 1.07889  | 0        | 0        | 0        | 0        | NA       | 0.16673   | NA       | 0         | NA       |
| ATZG44550 | ATGH9810  | 0        | 0        | 0        | 0        | 0          | 0        | 0        | 0        | 0        | 0        | 0        | 0        | #N/A     | #N/A     | #N/A      | #N/A     | #N/A      | #N/A     |
| ATZG44560 | ATGH9811  | 0        | 0        | 0        | 0        | 0          | 0        | 0        | 0        | 1.07889  | 0.976246 | 0        | 0        | 0        | 1.035907 | 0.348621  | NA       | 0         | NA       |
| ATZG44570 | ATGH9812  | 5.94452  | 5.352738 | 3.862963 | 5.773818 | 6.624673   | 4.984204 | 4.446517 | 0.976246 | 1.919071 | 2.660668 | 5.179533 | 0.184056 | 0.805537 | -0.51091 | 0.483644  | -0.40595 | NA        | NA       |
| ATZG44578 | ATZG44578 | 2.377808 | 0        | 0        | 2.886909 | 3.312336   | 2.995022 | 3.557214 | 2.15778  | 1.952492 | 1.919071 | 1.330334 | 1.035907 | 0.790737 | 0.247284 | 0.614899  | 0.409006 | 0.200395  | NA       |
| ATZG44580 | ATZG44580 | 78.46766 | 80.29107 | 65.67037 | 48.66504 | 64.92179   | 67.78517 | 56.91542 | 35.60337 | 47.83605 | 87.31774 | 59.86503 | 101.5188 | -0.30525 | 0.310011 | -0.629    | 0.034283 | 0.156589  | 0.785334 |
| ATZG44581 | ATZG44581 | 0        | 0        | 0        | 0        | 0          | 0        | 0        | 0        | 0        | 0        | 0        | 0        | #N/A     | #N/A     | #N/A      | #N/A     | #N/A      | #N/A     |
| ATZG44590 | DRP1D     | 3.566712 | 3.568492 | 5.150617 | 0.824831 | 2.649869   | 0.996841 | 1.778607 | 4.31556  | 0        | 5.757214 | 2.660668 | 2.071813 | -0.81132 | 0.235175 | -0.57541  | 0.446343 | -0.11264  | NA       |
| ATZG44600 | ATZG44600 | 39.23383 | 28.54794 | 47.64321 | 40.41673 | 42.39791   | 30.90206 | 53.35821 | 50.70783 | 51.74104 | 32.62421 | 26.60668 | 35.22082 | -0.02376 | 0.95262  | 0.390355  | 0.237964 | -0.28212  | 0.62574  |
| ATZG44610 | RABH1B    | 720.4758 | 901.0442 | 925.8235 | 1332.102 | 1309.035   | 1164.31  | 989.7948 | 1095.073 | 945.9824 | 960.4952 | 1161.382 | 781.0735 | 0.570777 | 0.000579 | 0.247087  | 0.197332 | 0.184609  | 0.550696 |
| ATZG44620 | MTACP1    | 558.7849 | 533.4896 | 600.0469 | 753.0708 | 1025.499   | 666.8865 | 618.9552 | 461.7649 | 461.7649 | 1290.035 | 787.7787 | 1290.424 | 0.501243 | 0.098436 | 0.297847  | 0.384446 | 0.667481  | 0.102486 |
| ATZG44630 | ATZG44630 | 9.511232 | 8.92123  | 15.45185 | 7.011065 | 9.937009   | 9.968408 | 1.778607 | 12.94668 | 8.786214 | 10.55489 | 6.65167  | 8.287252 | -0.29032 | 0.683779 | -0.44595  | 0.483632 | -0.31659  | NA       |
| ATZG44640 | ATZG44640 | 487.4506 | 451.4142 | 494.4593 | 330.7573 | 329.2462   | 329.9543 | 375.2861 | 364.6648 | 347.5436 | 554.6116 | 456.3046 | 512.7737 | -0.53115 | 1.52E-05 | -0.39655  | 0.002403 | 0.088397  | 0.734164 |
| ATZG44650 | CHL-CP610 | 420.872  | 371.1232 | 412.0944 | 540.6768 | 516.7245   | 463.531  | 490.0062 | 441.266  | 976.246  | 448.1031 | 380.4755 | 800.7557 | 0.316011 | 0.348493 | 0.627281  | 0.050935 | 0.409757  | 0.419797 |
| ATZG44660 | ATZG44660 | 76.08985 | 94.56504 | 69.53333 | 103.5163 | 102.14594  | 110.6493 | 89.81965 | 94.94231 | 54.66978 | 88.27728 | 58.53469 | 62.15439 | 0.297761 | 0.31471  | 0.005073  | 0.98928  | -0.17107  | 0.767369 |
| ATZG44670 | ATZG44670 | 336.4598 | 306.8903 | 387.584  | 481.289  | 555.1476   | 449.5752 | 350.3856 | 243.8291 | 413.9283 | 275.3867 | 292.6735 | 326.3106 | 0.512856 | 0.010123 | -0.03237  | 0.909163 | -0.20235  | 0.589491 |
| ATZG44680 | CKB4      | 273.4479 | 251.5787 | 298.7358 | 353.0277 | 443.8531   | 389.7647 | 338.2466 | 349.5603 | 350.4723 | 292.6584 | 268.7275 | 274.5152 | 0.512037 | 0.000381 | 0.324694  | 0.041704 | 0.017696  | 0.965712 |
| ATZG44690 | ARAC9     | 9.511232 | 14.27397 | 21.89012 | 14.02213 | 10.96525   | 9.274542 | 10.96525 | 15.18166 | 6.47334  | 13.66744 | 9.595356 | 7.982004 | -0.3258  | 0.546679 | -0.294891 | 0.619291 | -0.53032  | NA       |
| ATZG44700 | ATZG44700 | 7.133424 | 12.48972 | 12.87654 | 6.598649 | 6.624673   | 6.977885 | 11.56095 | 8.63112  | 8.786214 | 5.757214 | 9.312338 | 14.50269 | -0.5457  | 0.319505 | -0.10641  | 0.878966 | -0.09333  | NA       |
| ATZG44710 | ATZG44710 | 369.7491 | 308.6746 | 289.7222 | 299.0013 | 245.7754   | 344.9069 | 291.6915 | 347.4026 | 239.1803 | 326.2421 | 259.4151 | 263.1203 | -0.12444 | 0.601976 | -0.14032  | 0.575384 | -0.18447  | 0.625691 |
| ATZG44720 | ATZG44720 | 215.1916 | 199.8356 | 191.8605 | 211.9816 | 196.0903   | 200.365  | 175.1926 | 192.8313 | 270.4201 | 177.5141 | 183.5861 | 204.0736 | 0.004289 | 0.987247 | 0.090977  | 0.173733 | -0.10135  | 0.805437 |
| ATZG44730 | ATZG44730 | 5.94452  | 7.136984 | 10.30123 | 6.186234 | 5.299738   | 7.974726 | 7.114428 | 11.86779 | 5.857476 | 10.55489 | 14.63367 | 27.21346 | -0.24223 | 0.705071 | 0.053925  | 0.942458 | 0.360523  | NA       |
| ATZG44740 | CYCUA1    | 225.8917 | 301.5376 | 301.3111 | 168.2656 | 204.0399   | 145.5388 | 101.3806 | 115.4412 | 123.007  | 334.8779 | 415.0642 | 299.377  | -0.65121 | 0.001006 | -1.2452   | 2.62E-10 | 0.33817   | 0.29285  |
| ATZG44750 | WRKY12    | 17.83356 | 14.27397 | 19.31482 | 15.67179 | 16.56168   | 12.95893 | 10.67164 | 9.710009 | 5.857476 | 23.98839 | 17.29434 | 17.61041 | -0.16024 | 0.754318 | -0.83618  | 0.076652 | 0.175033  | NA       |
| ATZG44755 | TPK2      | 43.98945 | 55.31163 | 54.08128 | 65.16166 | 55.64725   | 50.83888 | 70.25498 | 95.33895 | 52.71728 | 49.89585 | 51.88302 | 55.93895 | 0.182422 | 0.545852 | 0.251243  | 0.423802 | 0.047312  | 0.946773 |
| ATZG44760 | ATZG44760 | 361.4268 | 335.4833 | 330.9272 | 372.3616 | 392.8431   | 323.9733 | 397.5187 | 384.0848 | 450.0494 | 412.6003 | 428.3675 | 449.5834 | 0.086956 | 0.606032 | 0.256261  | 0.0957   | 0.322211  | 0.113213 |
| ATZG44770 | ATZG44770 | 249.6698 | 235.5205 | 212.463  | 198.3719 | 186.1533   | 211.3302 | 166.2998 | 203.9102 | 211.8454 | 187.1094 | 147.6671 | 213.3967 | -0.22543 | 0.253462 | -0.25803  | 0.213237 | -0.3332   | 0.246344 |
| ATZG44780 | ATZG44780 | 0        | 0        | 0        | 0        | 0          | 0        | 0        | 0        | 0        | 0        | 0        | 0        | #N/A     | #N/A     | #N/A      | #N/A     | #N/A      | #N/A     |
| ATZG44790 | UC2       | 22.58917 | 16.05821 | 27.04074 | 33.81808 | 34.4483    | 44.85784 | 30.23632 | 24.81447 | 26.35864 | 7.676285 | 15.96401 | 8.287252 | 0.693944 | 0.054491 | 0.265513  | 0.557043 | -0.9588   | 0.094676 |
| ATZG44798 | ATZG44798 | 7.133424 | 5.352738 | 3.862963 | 4.948987 | 5.962205   | 0.996841 | 4.446517 | 4.31556  | 3.904984 | 3.838143 | 3.991002 | 10.35907 | -0.26448 | 0.176825 | -0.25222  | 0.748791 | -0.179196 | NA       |
| ATZG44800 | ATZG44800 | 0        | 0        | 0        | 0        | 0          | 0        | 1.778607 | 1.07889  | 0        | 0        | 1.330334 | 0        | 0        | NA       | 0         | NA       | 0         | NA       |
| ATZG44810 | DAD1      | 0        | 0        | 0        | 0        | 0          | 0        | 0        | 0        | 0        | 0        | 0        | 0        | 0.095918 | NA       | 0         | NA       | 0         | NA       |
| ATZG44820 | ATZG44820 | 131.9683 | 158.7979 | 166.1074 | 239.6134 | 231.2011   | 195.3808 | 184.0858 | 175.8591 | 275.3014 | 173.6759 | 215.5141 | 203.0377 | 0.536195 | 0.012432 | 0.46444   | 0.041824 | 0.362381  | 0.29385  |
| ATZG44830 | ATZG44830 | 149.8019 | 105.2705 | 124.9025 | 83.72036 | 63.59686   | 79.74726 | 78.25871 | 99.25787 | 63.45599 | 139.1327 | 107.7571 | 112.9138 | -0.72403 | 0.001072 | -0.64706  | 0.008164 | -0.08078  | 0.881338 |
| ATZG44840 | ERF413    | 5.94452  | 3.568492 | 2.575309 | 27.63184 | 29.81103   | 30.90206 | 48.02239 | 51.78672 | 91.76712 | 1.919071 | 1.330334 | 5.179533 | 2.229026 | 6.51E-07 | 3.273106  | 0.01E-14 | -0.33959  | 0.764564 |
| ATZG44850 | ATZG44850 | 67.76752 | 101.702  | 69.53333 | 66.81132 | 70.884     | 73.76622 | 73.81219 | 76.60119 | 75.11894 | 84.43914 | 83.81104 | 77.69299 | -0.15349 | 0.560971 | -0.05603  | 0.860316 | 0.064683  | 0.905719 |
| ATZG44860 | ATZG44860 | 448.2168 | 549.5478 | 529.2523 | 694.6174 | 693.0032   | 550.2561 | 626.6697 | 470.396  | 691.1702 | 547.8948 | 650.5333 | 625.6875 | 0.334538 | 0.071927 | 0.226061  | 0.272538 | 0.252296  | 0.403554 |
| ATZG44870 | ATZG44870 | 731.1759 | 913.534  | 761.0037 | 760.0819 | 798.9355   | 695.7949 | 808.3769 | 816.7197 | 888.3839 | 749.3973 | 798.2004 | 780.0376 | -0.08587 | 0.569183 | 0.067285  | 0.683461 | -0.0431   | 0.884875 |
| ATZG44880 | PCMP-EP9  | 4.755616 | 17.84246 | 2.575309 | 4.124156 | 4.637271   | 3.987363 | 8.003731 | 7.55223  | 4.88123  | 5.757214 | 10.64267 | 9.323159 | -0.64023 | 0.298649 | -0.13766  | 0.859351 | 0.097745  | NA       |
| ATZG44890 | CYP70A1   | 5.94452  | 5.352738 | 5.150617 | 18.97112 | 17.22415   | 13.95577 | 11.56095 | 6.47334  | 8.786214 | 4.797678 | 7.982004 | 5.179533 | 0.528385 | 0.390982 | 0.528385  | 0.390982 | 0.044385  | NA       |
| ATZG44900 | FBX5      | 305.5483 | 326.517  | 318.0506 | 216.1058 | 168.2667   | 287.0091 | 281.1099 | 257.8457 | 183.3422 | 328.6112 | 275.3791 | 278.6895 | -0.49183 | 0.026933 | -0.38134  | 0.112478 | -0.10101  | 0.837272 |
| ATZG44910 | ATHB-4    | 10.70014 | 16.05821 | 15.45185 | 21.03319 | 16.56168   | 12.95893 | 10.67164 | 14.02557 | 14.64369 | 9.595356 | 6.65167  | 16.5745  | 0.280653 | 0.586348 | -0.07618  | 0.904452 | -0.26922  | NA       |
| ATZG44920 | ATZG44920 | 101.7702 | 113.2112 | 115.1099 | 847.514  | 966.5398   | 787.5042 | 1068.943 | 1068.101 | 1565.899 | 1297.292 | 1234.55  | 1407.797 | -0.31973 | 0.074133 | 0.179297  | 0.376716 | 0.267314  | 0.33416  |
| ATZG44925 | ATZG44925 | 0        | 0        | 0        | 0        | 0          | 0        | 0        | 0        | 0        | 0        | 0        | 0        | #N/A     | #N/A     | #N/A      | #N/A     | #N/A      | #N/A     |
| ATZG44930 | ATZG44930 | 17.83356 | 10.70548 | 33.47901 | 5.361402 | 6.624673   | 9.968408 | 8.893035 | 9.710009 | 4.88123  | 20.15025 | 21.28534 | 26.93357 | -1.34478 | 0.002881 | -1.19428  | 0.013337 | 0.107131  | NA       |
| ATZG44940 | ERF034    | 230.6474 | 265.8527 | 172.5457 | 108.5163 | 86.78321   | 79.74726 | 35.57214 | 49.62894 | 48.8123  | 163.1211 | 121.0604 | 160.5655 | -1.24752 | 3.25E-09 | -2.22428  | 5.54E-23 | -0.58817  | 0.07143  |
| ATZG44950 | HUB1      | 298.4149 | 310.4588 | 276.8457 | 235.0668 | 235.8383   | 266.1565 | 297.9167 | 299.9314 | 250.8953 | 335.8375 | 276.7095 | 312.8438 | -0.27935 | 0.001631 | -0.05813  | 0.782112 | 0.069079  | 0.844779 |
| ATZG44970 | ATZG44970 | 281.7702 | 255.1472 | 300.0235 | 401.2804 | 377.6063</ |          |          |          |          |          |          |          |          |          |           |          |           |          |

|           |           |          |          |          |          |           |          |          |          |          |          |          |          |           |           |          |          |          |          |
|-----------|-----------|----------|----------|----------|----------|-----------|----------|----------|----------|----------|----------|----------|----------|-----------|-----------|----------|----------|----------|----------|
| ATZG45420 | LBD18     | 2.377808 | 1.784246 | 1.287654 | 0.824831 | 3.312336  | 2.990522 | 0.889303 | 1.07889  | 0        | 0        | 2.660668 | 1.035907 | 0.19826   | 0.805092  | -0.50684 | 0.495552 | -0.26149 | NA       |
| ATZG45430 | AHL22     | 0        | 1.784246 | 0        | 0        | 1.324935  | 0.996841 | 0        | 1.07889  | 0.976246 | 0.959536 | 0        | 0        | 0.112517  | NA        | 0.077291 | NA       | -0.08951 | NA       |
| ATZG45434 | ATZG45434 | 0        | 0        | 0        | 0        | 0         | 0        | 0        | 0        | 0        | 0        | 0        | 0        | #N/A      | #N/A      | #N/A     | #N/A     | #N/A     | #N/A     |
| ATZG45440 | DHDP52    | 247.292  | 185.5616 | 253.6679 | 224.3541 | 200.0651  | 216.3144 | 229.4403 | 269.7225 | 266.5152 | 251.3983 | 226.1568 | 217.5404 | -0.10775  | 0.589531  | 0.141693 | 0.490061 | 0.008034 | 0.987481 |
| ATZG45450 | ZPR1      | 128.4016 | 82.07532 | 88.84815 | 160.4299 | 191.453   | 145.5388 | 147.6244 | 102.4945 | 152.2944 | 113.2252 | 163.6311 | 114.9856 | 0.69352   | 0.060477  | 0.398807 | 0.152331 | 0.350587 | 0.410006 |
| ATZG45460 | ATZG45460 | 97.49012 | 80.29107 | 88.84815 | 160.4299 | 166.12075 | 114.6367 | 111.6249 | 107.889  | 98.60085 | 70.0661  | 115.7391 | 91.15977 | 0.15521   | 0.566688  | 0.23618  | 0.391386 | 0.030003 | 0.962539 |
| ATZG45470 | FLA8      | 1332.761 | 604.8594 | 677.3062 | 196.3098 | 196.0903  | 219.305  | 215.2114 | 292.3792 | 277.2539 | 581.4786 | 528.1426 | 55.241   | -2.00927  | 1.9E-17   | -1.66512 | 3.62E-12 | -0.62755 | 0.075056 |
| ATZG45480 | AGFR9     | 19.02246 | 8.92123  | 25.75309 | 41.24156 | 36.4357   | 38.87679 | 31.12562 | 38.84004 | 39.04984 | 21.10978 | 25.27635 | 25.89766 | 0.978699  | 0.004039  | 0.875702 | 0.016052 | 0.323892 | 0.641459 |
| ATZG45490 | AUR3      | 10.70014 | 23.1952  | 21.89012 | 33.40566 | 41.73544  | 45.85468 | 35.57214 | 34.52448 | 19.52492 | 32.62421 | 39.91002 | 18.64632 | 1.0109    | 0.008171  | 0.624024 | 0.152331 | 0.633386 | 0.317253 |
| ATZG45500 | ATZG45500 | 91.5456  | 130.25   | 123.6148 | 293.9638 | 245.1129  | 234.2576 | 262.3445 | 197.4369 | 188.4155 | 141.5588 | 167.6221 | 118.0933 | 1.02484   | 5.72E-06  | 0.884128 | 0.000158 | 0.115411 | 0.834421 |
| ATZG45510 | CYP704A2  | 199.7359 | 208.7568 | 175.121  | 466.0296 | 485.5885  | 471.5057 | 392.1828 | 340.9292 | 261.6339 | 144.8889 | 155.6491 | 146.0628 | 1.265331  | 5.92E-15  | 0.758008 | 1.13E-05 | -0.37557 | 0.184231 |
| ATZG45520 | ATZG45520 | 227.0807 | 297.9691 | 292.2975 | 316.3227 | 356.4074  | 274.1312 | 278.352  | 224.4091 | 395.3796 | 250.4388 | 260.7455 | 271.4075 | 0.212108  | 0.383485  | 0.13663  | 0.619388 | -0.05733 | 0.914481 |
| ATZG45530 | ATZG45530 | 150.9908 | 174.8561 | 124.9025 | 117.126  | 97.38269  | 112.643  | 123.6132 | 100.3368 | 155.2231 | 118.0229 | 122.3907 | 143.991  | -0.43844  | 0.407882  | -0.23082 | 0.369301 | -0.21334 | 0.598084 |
| ATZG45540 | ATZG45540 | 1429.063 | 995.6093 | 923.2482 | 562.9473 | 506.125   | 729.6874 | 579.8259 | 746.5918 | 473.4793 | 804.0909 | 759.6207 | 756.2118 | -0.87233  | 3.05E-05  | -0.86964 | 4.04E-05 | -0.514   | 0.092865 |
| ATZG45550 | CYP76C4   | 1.188904 | 0        | 0        | 0        | 1.987402  | 0.996841 | 0.889303 | 1.07889  | 0        | 0        | 0        | 0        | 0.235428  | NA        | 0.377975 | NA       | -0.23292 | NA       |
| ATZG45560 | CYP76C1   | 564.7294 | 633.4073 | 593.6087 | 342.3049 | 318.6468  | 407.7079 | 520.2425 | 532.9716 | 470.5506 | 690.8657 | 667.8277 | 665.052  | -0.74166  | 4.59E-09  | -0.22862 | 0.121819 | 0.176837 | 0.439946 |
| ATZG45570 | CYP76C2   | 2.377808 | 5.352738 | 9.01358  | 72.99756 | 66.24673  | 100.6809 | 110.2736 | 102.4945 | 53.69265 | 5.757214 | 3.991002 | 4.143626 | 3.224845  | 9.67E-16  | 3.371766 | 5.23E-17 | -0.20652 | 0.858201 |
| ATZG45580 | CYP76C3   | 0        | 1.784246 | 2.575309 | 2.886909 | 2.649869  | 5.981045 | 2.66791  | 3.23667  | 0.972464 | 0        | 0        | 2.071813 | 0.737835  | 0.285854  | 0.300719 | 0.713767 | -0.3139  | NA       |
| ATZG45590 | ATZG45590 | 639.6303 | 585.2327 | 521.5    | 447.8833 | 467.0394  | 391.7584 | 293.4701 | 343.087  | 466.6456 | 445.2245 | 368.5025 | 480.6606 | -0.40673  | 0.037001  | -0.64769 | 0.000685 | -0.41983 | 0.132158 |
| ATZG45600 | CX8       | 98.67903 | 124.8972 | 99.14938 | 58.97543 | 68.23413  | 47.84836 | 43.57587 | 43.1556  | 56.62227 | 96.9131  | 85.14137 | 88.05205 | -0.82689  | 0.000183  | -1.11353 | 1.54E-06 | -0.23246 | 0.581757 |
| ATZG45610 | CX9       | 3.566712 | 1.784246 | 1.287654 | 0.412416 | 1.324935  | 0        | 0.889303 | 1.07889  | 0.976246 | 1.919071 | 1.330334 | 0        | -0.72883  | 0.2795    | -0.4865  | 0.510717 | -0.43369 | NA       |
| ATZG45620 | ATZG45620 | 668.164  | 699.4244 | 624.5124 | 472.6282 | 422.6541  | 544.2751 | 581.6045 | 603.0995 | 497.8855 | 555.5711 | 565.3919 | 564.5691 | -0.66552  | 0.000662  | -0.23925 | 0.120697 | -0.23663 | 0.289901 |
| ATZG45630 | ATZG45630 | 93.92341 | 69.5856  | 66.95803 | 84.95761 | 88.77061  | 59.81045 | 76.4801  | 75.5223  | 116.1733 | 69.08657 | 82.48071 | 77.69299 | 0.024169  | 0.947318  | 0.200609 | 0.537459 | -0.0203  | 0.979097 |
| ATZG45640 | SAP18     | 246.1031 | 239.089  | 319.3383 | 421.9011 | 460.4148  | 358.8627 | 375.2861 | 367.9015 | 570.1277 | 300.3347 | 194.2288 | 339.7773 | 0.601178  | 0.01302   | 0.678009 | 0.005638 | 0.052281 | 0.932511 |
| ATZG45650 | AGL6      | 5.94452  | 7.136984 | 3.862963 | 3.71174  | 1.324935  | 0        | 3.57214  | 0        | 0.976246 | 1.427396 | 11.97301 | 3.10772  | -0.90254  | 0.127893  | -0.97232 | 0.159496 | 0.524865 | NA       |
| ATZG45660 | SOC1      | 156.8164 | 1853.832 | 1700.991 | 1452.515 | 1685.317  | 1299.88  | 1847.083 | 1494.263 | 1700.621 | 2064.921 | 2471.761 | 1836.662 | -0.20222  | 2.5047    | -0.02132 | 0.926175 | 0.31007  | 0.202816 |
| ATZG45670 | LPEAT7    | 1231.704 | 1182.955 | 1133.136 | 744.8225 | 684.9912  | 794.4821 | 879.5211 | 917.0564 | 603.32   | 1046.853 | 1077.571 | 1010.009 | -0.66327  | 0.202E-05 | -0.55471 | 0.000565 | -0.17604 | 0.547995 |
| ATZG45680 | TCP9      | 9.511232 | 16.05821 | 5.150617 | 42.06639 | 36.4357   | 29.90522 | 19.56468 | 25.89336 | 47.83605 | 6.835821 | 7.982004 | 7.251346 | 1.627954  | 0.00012   | 1.406717 | 0.001564 | -0.24988 | 0.810702 |
| ATZG45685 | ATZG45685 | 0        | 0        | 0        | 0        | 1.324935  | 0        | 0        | 0        | 0.976246 | 0.995936 | 1.330334 | 0        | 0.212427  | NA        | 0.148648 | NA       | 0.344709 | NA       |
| ATZG45690 | PEX16     | 99.86793 | 117.7602 | 113.3136 | 139.8089 | 131.831   | 132.5798 | 109.3843 | 128.3879 | 108.3633 | 112.2657 | 75.82904 | 111.8779 | 0.290894  | 0.17686   | 0.066463 | 0.815144 | -0.11765 | 0.792756 |
| ATZG45695 | URM1-1    | 34.47821 | 28.54794 | 23.17778 | 54.85127 | 62.27192  | 49.84204 | 40.90796 | 35.60337 | 70.28971 | 34.54328 | 38.57969 | 37.29264 | 0.885211  | 0.056063  | 0.70468  | 0.042481 | 0.314951 | 0.617173 |
| ATZG45700 | ATZG45700 | 286.5259 | 306.8903 | 300.0235 | 279.2053 | 258.3622  | 281.1091 | 319.2559 | 308.5625 | 219.6553 | 287.8607 | 262.0758 | 299.377  | -0.12246  | 0.536368  | -0.07282 | 0.748321 | -0.06773 | 0.863358 |
| ATZG45710 | RPS27A    | 71.33424 | 83.85956 | 87.5605  | 171.5649 | 160.9795  | 116.6304 | 70.25498 | 69.04896 | 170.843  | 120.9015 | 117.0694 | 89.08796 | 0.83438   | 0.009203  | 0.328598 | 0.393219 | 0.398819 | 0.482582 |
| ATZG45720 | ATZG45720 | 121.2682 | 107.1602 | 103.2123 | 116.3012 | 107.9822  | 114.6367 | 122.7239 | 135.9401 | 146.4369 | 142.0113 | 122.3907 | 122.237  | -0.0113   | 0.956234  | 0.238196 | 0.274438 | 0.177948 | 0.62176  |
| ATZG45730 | ATZG45730 | 253.2365 | 290.8321 | 330.9272 | 296.5268 | 321.2966  | 287.0901 | 299.6953 | 277.2747 | 232.3465 | 336.797  | 315.2892 | 329.4183 | 0.050251  | 0.806531  | -0.10863 | 0.593914 | 0.165606 | 0.574689 |
| ATZG45740 | PEX11D    | 990.357  | 1179.387 | 1158.889 | 1028.152 | 1122.882  | 1101.509 | 1880.877 | 1803.904 | 2130.169 | 1390.367 | 1362.262 | 1309.386 | -0.03221  | 0.838642  | 0.799688 | 9.31E-13 | 0.286558 | 0.094041 |
| ATZG45750 | ATZG45750 | 15.45575 | 8.92123  | 11.58889 | 2.062078 | 3.312336  | 2.990522 | 6.225124 | 3.23667  | 3.904984 | 10.55489 | 9.312338 | 5.179533 | -1.163699 | 0.002053  | -1.10677 | 0.504304 | -0.44072 | NA       |
| ATZG45760 | BAP2      | 2.377808 | 5.352738 | 2.575309 | 10.7228  | 12.58688  | 8.971567 | 8.003731 | 5.39445  | 9.67246  | 0        | 0        | 0        | 1.332682  | 0.020318  | 0.896266 | 0.165255 | -1.24588 | NA       |
| ATZG45770 | CPFT5Y    | 510.0398 | 567.3902 | 481.5827 | 467.2668 | 467.7019  | 397.7395 | 449.9876 | 438.0293 | 551.579  | 566.126  | 514.8392 | 508.6301 | -0.21574  | 0.17217   | -0.10983 | 0.594749 | 0.031904 | 0.932481 |
| ATZG45780 | ATZG45780 | 0        | 0        | 1.287654 | 2.474493 | 2.96125   | 0.996841 | 0        | 1.07889  | 0        | 0        | 2.660668 | 0        | 0.542958  | 0.385856  | -0.08501 | 0.909292 | 0.14888  | NA       |
| ATZG45790 | PMM       | 494.584  | 496.0204 | 565.2803 | 843.8899 | 993.2435  | 962.862  | 831.4988 | 731.4874 | 989.9134 | 450.0222 | 327.2622 | 578.0358 | 0.713079  | 0.000307  | 0.69496  | 0.000555 | -0.19101 | 0.619558 |
| ATZG45800 | PLIM2A    | 11.88904 | 3.568492 | 6.438272 | 4.948987 | 9.274542  | 4.984204 | 8.003731 | 1.07889  | 3.904984 | 8.635821 | 14.63367 | 11.39497 | -0.18586  | 0.790399  | -0.54351 | 0.421083 | 0.466115 | NA       |
| ATZG45810 | RH6       | 984.4125 | 915.3182 | 861.4408 | 661.5146 | 763.1623  | 768.5642 | 829.7201 | 829.6664 | 703.8734 | 881.8132 | 694.4343 | 798.6839 | -0.33077  | 0.021299  | -0.22203 | 0.16076  | -0.21268 | 0.363972 |
| ATZG45820 | DBP       | 1654.954 | 185.8623 | 1849.072 | 1698.74  | 1918.505  | 1438.441 | 1702.127 | 1424.135 | 2609.506 | 1823.118 | 1885.083 | 2068.765 | -0.07969  | 0.672768  | 0.096939 | 0.723354 | 0.106817 | 0.810994 |
| ATZG45830 | DTA2      | 26.15589 | 30.33218 | 45.0679  | 24.74493 | 17.22415  | 22.92734 | 34.68284 | 36.68226 | 34.16861 | 32.62421 | 34.58868 | 24.81876 | -0.59476  | 0.085324  | 0.049321 | 0.915678 | -0.13955 | 0.855952 |
| ATZG45840 | ATZG45840 | 2.377808 | 5.352738 | 1.287654 | 0.412416 | 1.324935  | 0        | 0        | 0        | 5.757214 | 2.660668 | 2.076116 | 0        | -0.93487  | 0.160448  | -1.237   | 0.056465 | 0.233369 | NA       |
| ATZG45850 | AHL9      | 299.6038 | 371.1232 | 300.0235 | 400.4555 | 399.4678  | 438.6099 | 476.6667 | 460.686  | 479.3368 | 300.3347 | 290.0128 | 350.1364 | 0.352369  | 0.014388  | 0.547253 | 0.0001   | -0.03439 | 0.926068 |
| ATZG45860 | ATZG45860 | 76.08985 | 51.74313 | 66.95803 | 116.3012 | 130.5061  | 65.9149  | 93.37687 | 58.26006 | 188.4155 | 61.41028 | 66.5167  | 108.7702 | 0.612234  | 0.125756  | 0.716313 | 0.079318 | 0.244083 | 0.757199 |
| ATZG45870 | ATZG45870 | 40.00423 | 35.68492 | 27.04074 | 22.27044 | 23.84882  | 27.91154 | 20.45398 | 19.42002 | 16.59618 | 39.34096 | 25.27635 | 31.0772  | -0.46185  | 0.190231  | -0.79426 | 0.029834 | -0.0832  | 0.920201 |
| ATZG45880 | BAM7      | 155.7464 | 169.5034 | 140.3543 | 135.9847 | 125.8688  | 148.5293 | 133.9955 | 135.9401 | 97.6246  | 137.2136 | 137.0244 | 151.2424 | -0.17817  | 0.407155  | -0.32991 | 0.122116 |          |          |

|           |           |          |          |          |          |          |          |          |          |          |          |          |          |          |          |          |          |          |          |
|-----------|-----------|----------|----------|----------|----------|----------|----------|----------|----------|----------|----------|----------|----------|----------|----------|----------|----------|----------|----------|
| ATZG46410 | CPC       | 5.94452  | 7.136984 | 9.01358  | 13.60971 | 7.949607 | 9.968408 | 9.782338 | 9.710009 | 19.52492 | 7.676285 | 9.312338 | 4.143626 | 0.426085 | 0.466128 | 0.657444 | 0.258526 | -0.07092 | NA       |
| ATZG46420 | ATZG46420 | 307.9261 | 265.8527 | 297.4482 | 452.8323 | 423.9791 | 511.3793 | 340.6032 | 294.537  | 235.2753 | 237.0053 | 300.6555 | 262.0844 | 0.653171 | 0.00012  | -0.00413 | 0.98728  | -0.12911 | 0.721971 |
| ATZG46430 | CNGC3     | 311.4928 | 388.9656 | 332.2148 | 1078.054 | 1169.917 | 1126.43  | 737.2326 | 740.1185 | 572.0802 | 153.5257 | 199.5501 | 200.9659 | 1.686103 | 5.53E-10 | 0.977313 | 2.53E-10 | -0.87748 | 3.59E-06 |
| ATZG46440 | CNGC11    | 606.341  | 774.3628 | 655.4161 | 1107.748 | 1068.56  | 1176.272 | 638.5199 | 606.3361 | 478.3605 | 308.0109 | 393.7789 | 385.3572 | 0.711125 | 4.06E-06 | -0.23281 | 0.208834 | -0.88781 | 5.97E-07 |
| ATZG46450 | CNGC12    | 792.9999 | 835.0271 | 825.3864 | 1379.53  | 1274.587 | 1372.65  | 765.903  | 695.884  | 453.5944 | 497.8948 | 679.8007 | 669.1956 | 0.700092 | 0.000084 | -0.34837 | 0.083228 | -0.36354 | 0.197691 |
| ATZG46455 | ATZG46455 | 5.94452  | 7.136984 | 9.01358  | 13.60971 | 7.949607 | 9.968408 | 9.782338 | 9.710009 | 19.52492 | 7.676285 | 9.312338 | 4.143626 | 0.426085 | 0.466128 | 0.657444 | 0.258526 | -0.07092 | NA       |
| ATZG46460 | ATZG46460 | 0        | 0        | 0        | 0        | 0        | 0        | 0        | 0        | 0        | 0        | 0        | 0        | #N/A     | #N/A     | #N/A     | #N/A     | #N/A     | #N/A     |
| ATZG46470 | OXA11     | 205.6804 | 187.3458 | 194.4358 | 202.0836 | 241.1381 | 237.2481 | 170.7463 | 198.5157 | 257.7289 | 172.7164 | 183.5861 | 202.0018 | 0.19981  | 0.342812 | 0.08774  | 0.728552 | -0.07471 | 0.866496 |
| ATZG46480 | GAUT2     | 1.188904 | 1.784246 | 1.287654 | 0.824831 | 0.662467 | 0        | 1.778607 | 0        | 0.976246 | 3.838143 | 0        | 2.071813 | -0.4402  | 0.534019 | -0.18707 | 0.818794 | 0.265382 | NA       |
| ATZG46490 | ATZG46490 | 257.9922 | 235.5205 | 251.0926 | 300.2385 | 268.9617 | 219.305  | 196.5361 | 238.4347 | 437.3582 | 222.6123 | 171.6131 | 256.9048 | 0.081175 | 0.816845 | 0.215982 | 0.514684 | -0.18227 | 0.743519 |
| ATZG46493 | ATZG46493 | 0        | 0        | 0        | 0        | 0        | 0        | 0.889303 | 0        | 0        | 0        | 0        | 0        | 0        | NA       | 0        | NA       | 0        | NA       |
| ATZG46494 | ATL21B    | 0        | 0        | 0        | 0.824831 | 0.662467 | 0.996841 | 1.778607 | 0        | 0        | 0        | 0        | 0        | 0.4504   | NA       | 0.320562 | NA       | 0        | NA       |
| ATZG46495 | ATL21A    | 0        | 0        | 0        | 0        | 0        | 0        | 0        | 0        | 0        | 0        | 0        | 0        | #N/A     | #N/A     | #N/A     | #N/A     | #N/A     | #N/A     |
| ATZG46500 | PIAK64    | 444.6501 | 478.1779 | 424.9259 | 455.3068 | 448.4903 | 529.3225 | 515.796  | 621.4406 | 598.4388 | 401.0859 | 355.1992 | 378.1059 | 0.085761 | 0.609462 | 0.362017 | 0.012027 | -0.24024 | 0.292075 |
| ATZG46505 | SDH4      | 450.5946 | 347.928  | 355.3926 | 283.3295 | 463.7271 | 298.0554 | 394.8507 | 234.1191 | 510.5767 | 314.7277 | 348.5475 | 379.1418 | -0.13781 | 0.675599 | -0.01767 | 0.963226 | -0.14151 | 0.806231 |
| ATZG46510 | AIB       | 294.8482 | 244.4417 | 212.463  | 274.6688 | 240.4756 | 387.7711 | 488.2276 | 461.7649 | 402.2133 | 253.3174 | 256.7545 | 263.1203 | 0.24656  | 0.27118  | 0.822913 | 2.91E-05 | 0.036892 | 0.946092 |
| ATZG46520 | CAS       | 448.2168 | 297.9691 | 309.037  | 191.3660 | 210.6646 | 227.2797 | 253.4515 | 230.8824 | 200.5992 | 248.5197 | 287.3521 | 293.1615 | -0.73982 | 5.63E-05 | -0.60904 | 0.001548 | -0.34759 | 0.241031 |
| ATZG46530 | ARF11     | 187.8468 | 205.1883 | 181.5593 | 92.38109 | 90.09555 | 102.9415 | 116.5201 | 99.57709 | 160.2424 | 190.2378 | 182.3139 | -0.9821  | 2.44E-09 | -0.78352 | 6.1E-06  | -0.1059  | 0.769636 |          |
| ATZG46535 | ATZG46535 | 45.17835 | 32.11643 | 34.76667 | 76.7093  | 76.18374 | 43.86099 | 37.35075 | 23.73558 | 73.21845 | 32.62421 | 49.22236 | 39.36445 | 0.740789 | 0.052314 | 0.226473 | 0.63915  | 0.081513 | 0.93307  |
| ATZG46540 | ATZG46540 | 97.49012 | 130.25   | 123.6148 | 211.5692 | 211.9895 | 155.5072 | 137.842  | 129.4668 | 220.6316 | 177.5141 | 190.2378 | 125.3447 | 0.700914 | 0.006201 | 0.458067 | 0.106004 | 0.469222 | 0.245146 |
| ATZG46550 | ATZG46550 | 909.5115 | 1138.349 | 1004.37  | 829.3677 | 778.399  | 838.3431 | 824.3843 | 947.2654 | 1041.654 | 1100.391 | 964.4921 | 1004.829 | -0.31296 | 0.020713 | -0.11373 | 0.484957 | -0.03072 | 0.927039 |
| ATZG46560 | ATZG46560 | 928.534  | 843.9484 | 700.84   | 459.0185 | 378.2688 | 614.0539 | 594.1653 | 751.9863 | 416.857  | 675.5131 | 659.8456 | 632.9389 | -0.74583 | 0.000588 | -0.47307 | 0.051492 | -0.31809 | 0.406722 |
| ATZG46567 | ATZG46567 | 3.566712 | 3.568492 | 5.150617 | 5.361402 | 7.28714  | 3.987363 | 5.335821 | 1.07889  | 2.928738 | 1.919071 | 5.321336 | 6.215439 | 0.323661 | 0.65157  | -0.23601 | 0.772107 | 0.062369 | NA       |
| ATZG46570 | LAC6      | 10.70014 | 1.784246 | 9.01358  | 3.71174  | 3.312336 | 5.981045 | 6.225124 | 4.31556  | 1.952492 | 7.676285 | 9.312338 | 9.323159 | -0.62786 | 0.308614 | -0.60178 | 0.368865 | 0.174742 | NA       |
| ATZG46572 | ATZG46572 | 1.188904 | 1.784246 | 2.575309 | 1.237247 | 0        | 1.993682 | 0        | 1.07889  | 0        | 0        | 5.321336 | 0        | -0.27106 | 0.710032 | -0.58245 | 0.388559 | -0.05438 | NA       |
| ATZG46580 | POPX2     | 108.1903 | 117.7602 | 121.0395 | 202.9085 | 202.0525 | 184.4155 | 260.5659 | 157.5179 | 197.2017 | 156.4043 | 126.3817 | 190.6068 | 0.742252 | 0.007129 | 0.803515 | 0.000316 | 0.438301 | 0.210473 |
| ATZG46590 | DPFZ.5    | 228.2696 | 162.3664 | 180.8777 | 264.3584 | 241.1381 | 256.1881 | 276.5734 | 247.0658 | 175.7243 | 183.2713 | 254.0938 | 211.3249 | 0.396739 | 0.000784 | 0.276956 | 0.257484 | 0.165658 | 0.696082 |
| ATZG46600 | KIC       | 442.2723 | 604.8594 | 579.4445 | 1432.732 | 1503.801 | 1217.143 | 1186.331 | 1133.913 | 2303.941 | 576.6809 | 751.6387 | 530.3841 | 1.294284 | 1.22E-07 | 1.442069 | 3.05E-09 | 0.183376 | 0.725981 |
| ATZG46610 | RS31A     | 96.30122 | 103.4863 | 88.84815 | 117.126  | 104.6698 | 109.6525 | 87.15174 | 90.62675 | 90.79183 | 96.9131  | 83.81104 | 80.80071 | 0.206336 | 0.347446 | -0.09589 | 0.723588 | -0.12791 | 0.768192 |
| ATZG46620 | ATZG46620 | 91.5456  | 126.6815 | 115.8889 | 249.099  | 213.9769 | 308.0238 | 275.6841 | 309.6414 | 362.1873 | 97.87263 | 89.13238 | 103.5907 | 1.176516 | 2.34E-09 | 1.471989 | 4.54E-14 | -0.18085 | 0.680453 |
| ATZG46630 | ATZG46630 | 189.0357 | 80.29107 | 97.86173 | 32.58083 | 35.77233 | 32.89259 | 29.34701 | 40.99782 | 31.23987 | 107.468  | 114.4087 | 80.80071 | -1.74107 | 2.34E-09 | -1.74544 | 6.97E-09 | -0.28784 | 0.622275 |
| ATZG46640 | ATZG46640 | 92.73451 | 90.99655 | 103.0123 | 71.34789 | 78.83361 | 72.76938 | 48.91169 | 51.78672 | 59.55101 | 102.6703 | 81.15037 | 73.54936 | -0.35507 | 0.125438 | -0.81289 | 0.000444 | -0.14739 | 0.749335 |
| ATZG46650 | CYTB5-C   | 431.5721 | 308.6746 | 394.0222 | 369.5244 | 298.7727 | 294.068  | 308.5883 | 236.2769 | 380.7359 | 490.3227 | 526.8123 | 513.8096 | -0.23226 | 0.288564 | -0.28956 | 0.197332 | 0.416236 | 0.153029 |
| ATZG46660 | CYP78A6   | 24.96968 | 23.1952  | 23.17778 | 10.31039 | 7.949607 | 8.971567 | 20.45398 | 9.710009 | 4.88123  | 22.06932 | 21.28534 | 20.71813 | -1.19241 | 0.005091 | -0.86992 | 0.060734 | -0.13387 | 0.891689 |
| ATZG46662 | ATZG46662 | 0        | 0        | 0        | 0        | 0        | 0        | 0        | 0        | 0        | 0        | 0        | 0        | #N/A     | #N/A     | #N/A     | #N/A     | #N/A     | #N/A     |
| ATZG46670 | ATZG46670 | 161.6909 | 171.2876 | 167.3951 | 78.35896 | 80.82101 | 65.79149 | 40.90796 | 30.20892 | 26.35864 | 155.5257 | 178.2648 | 158.4937 | -1.11006 | 1.22E-09 | -2.52761 | 7.54E-27 | -0.02945 | 0.953899 |
| ATZG46680 | ATHB-7    | 115.3237 | 99.91778 | 145.5049 | 356.3271 | 370.9817 | 334.9385 | 395.74   | 372.217  | 474.4556 | 156.4043 | 199.5501 | 155.386  | 1.510848 | 2.97E-18 | 1.731318 | 1.49E-23 | 0.468418 | 0.092225 |
| ATZG46685 | MIR166A   | 0        | 0        | 0        | 0.412416 | 0        | 0        | 0        | 0        | 0        | 0        | 0        | 0        | 0.095918 | NA       | 0        | NA       | 0        | NA       |
| ATZG46690 | SAUR32    | 154.5575 | 171.2876 | 164.8198 | 158.3676 | 206.0273 | 128.5925 | 197.4254 | 119.7568 | 264.5627 | 233.1672 | 224.8264 | 222.7199 | 0.011733 | 0.974006 | 0.238469 | 0.449602 | 0.453226 | 0.269516 |
| ATZG46700 | CRK3      | 72.52314 | 92.78079 | 83.69753 | 101.8666 | 103.3449 | 105.6651 | 123.6132 | 119.7568 | 97.6246  | 76.76285 | 81.15037 | 88.05205 | 0.321072 | 0.144785 | 0.453776 | 0.001458 | -0.00596 | 0.992454 |
| ATZG46710 | ROPGAP3   | 499.3397 | 567.3902 | 544.6778 | 229.7155 | 245.1129 | 269.147  | 232.1082 | 233.0402 | 241.1328 | 392.4501 | 407.0822 | 492.0556 | -1.10487 | 1.09E-16 | -1.10772 | 1.11E-17 | -0.31156 | 0.137316 |
| ATZG46720 | HIC       | 21.40027 | 10.70548 | 18.02716 | 10.31039 | 9.937009 | 7.974726 | 14.22886 | 9.710009 | 19.52492 | 10.55489 | 13.30334 | 14.50269 | -0.72446 | 0.114919 | -0.1992  | 0.729787 | -0.36671 | NA       |
| ATZG46730 | ATZG46730 | 23.77808 | 24.79944 | 30.9037  | 21.44561 | 14.57428 | 19.93682 | 18.67537 | 19.42002 | 11.71495 | 25.90746 | 34.58868 | 24.86176 | -0.4585  | 0.244201 | -0.61272 | 0.141979 | 0.07919  | 0.931292 |
| ATZG46735 | ATZG46735 | 60.6341  | 71.36984 | 66.95803 | 55.6761  | 64.92179 | 48.8451  | 52.86561 | 65.40848 | 76.76285 | 81.15037 | 61.11849 | -0.20663 | 0.465073 | -0.20399 | 0.508168 | 0.136575 | 0.795899 |          |
| ATZG46740 | GULL05    | 2.377808 | 1.784246 | 9.01358  | 2.062078 | 0.662467 | 1.993682 | 3.557214 | 2.15778  | 2.928738 | 8.635821 | 6.65167  | 1.035907 | -0.84418 | 0.210806 | -0.36807 | 0.645338 | 0.190541 | NA       |
| ATZG46750 | GULL02    | 1.188904 | 0        | 0        | 3.299325 | 2.649869 | 3.987363 | 4.446517 | 4.67334  | 0.976246 | 0        | 0        | 0        | 1.059446 | 0.103654 | 1.190939 | 0.072263 | -0.30557 | NA       |
| ATZG46760 | GULL06    | 13.07794 | 7.136984 | 11.58889 | 5.361402 | 6.624673 | 3.987363 | 8.893035 | 6.47334  | 2.928738 | 18.23118 | 17.29434 | 11.39497 | -0.80398 | 0.130051 | -0.64472 | 0.273446 | 0.455397 | NA       |
| ATZG46770 | NAC043    | 1.188904 | 0        | 1.287654 | 0.824831 | 0        | 2.66791  | 3.23667  | 1.952492 | 1.919071 | 6.65167  | 6.65167  | 2.071813 | -0.45033 | 0.534672 | 0.642791 | 0.379587 | 0.860605 | NA       |
| ATZG46780 | ATZG46780 | 185.469  | 132.0342 | 131.3407 | 65.16166 | 64.25933 | 67.78517 | 74.70149 | 87.39009 | 57.59851 | 112.2657 | 151.6581 | 123.2729 | -1.15662 | 8.73E-08 | -1.00539 | 8.18E-06 | -0.22107 | 0.595911 |
| ATZG46787 | ATZG46787 | 0        | 0        | 0        | 0        | 0        | 0        | 0        | 0        | 0        | 0        | 0        | 0        | #N/A     | #N/A     | #N/A     | #N/A     | #N/A     | #N/A     |
| ATZG46790 | APRR9     | 643.197  | 704.7772 | 642.5395 | 247.0369 | 264.3244 | 227.2797 | 113.8308 | 72.28563 | 57.59851 | 622.7386 | 638.5603 | 606.0053 | -1.39746 | 1.5E-17  | -2.93807 | 8.13E-62 | -0.08894 | 0.815889 |
| ATZG46800 | MTP1      | 474.3727 | 483.5307 | 468.7062 | 473.4531 | 429.2788 | 482.4709 | 392.1828 | 491.9738 | 343.6386 |          |          |          |          |          |          |          |          |          |



|           |           |          |          |          |          |          |          |          |          |          |          |          |          |           |          |          |          |           |          |
|-----------|-----------|----------|----------|----------|----------|----------|----------|----------|----------|----------|----------|----------|----------|-----------|----------|----------|----------|-----------|----------|
| AT2G47310 | AT2G47310 | 61.82301 | 55.31163 | 61.80741 | 59.38784 | 62.27192 | 56.81992 | 76.4801  | 73.36452 | 44.90732 | 67.16749 | 43.90102 | 70.44164 | -0.00709  | 0.985107 | 0.111146 | 0.763149 | 0.027691  | 0.971473 |
| AT2G47320 | CYP21     | 617.0411 | 669.0923 | 697.9087 | 923.8109 | 1028.149 | 811.4284 | 715      | 610.6517 | 933.2912 | 828.0792 | 830.1284 | 797.648  | 0.470891  | 0.005643 | 0.184598 | 0.359014 | 0.302279  | 0.257545 |
| AT2G47330 | RH24      | 334.082  | 388.9656 | 332.2148 | 243.7376 | 274.2615 | 315.9985 | 297.9167 | 332.2981 | 217.7029 | 329.1207 | 258.0848 | 249.6535 | -0.33542  | 0.017375 | -0.30522 | 0.167627 | -0.32014  | 0.314709 |
| AT2G47340 | AT2G47340 | 0        | 0        | 0        | 0        | 0.662467 | 0        | 0        | 1.07889  | 0        | 0        | 0        | 0        | 0.098648  | NA       | 0.150881 | NA       | 0         | NA       |
| AT2G47350 | AT2G47350 | 108.1903 | 133.8185 | 141.642  | 122.4874 | 130.5061 | 145.5388 | 116.4988 | 132.7035 | 142.5319 | 155.4448 | 146.3367 | 150.2064 | 0.049095  | 0.840466 | 0.033102 | 0.902366 | 0.238752  | 0.473107 |
| AT2G47360 | AT2G47360 | 2.377808 | 1.784246 | 1.287654 | 2.062078 | 1.987402 | 1.993682 | 2.66791  | 1.07889  | 0.976246 | 6.835821 | 2.660668 | 6.215439 | 0.021289  | 0.980216 | -0.11566 | 0.895871 | 1.041845  | NA       |
| AT2G47370 | AT2G47370 | 55.87849 | 73.15409 | 42.49259 | 33.81808 | 33.78583 | 27.91514 | 28.51741 | 28.05114 | 24.40615 | 48.93632 | 47.89202 | 51.79533 | -0.76346  | 0.060318 | -0.99751 | 0.000752 | 0.17291   | 0.769636 |
| AT2G47380 | AT2G47380 | 93.92341 | 66.0171  | 90.1358  | 106.4032 | 127.1937 | 93.70303 | 89.81965 | 50.70783 | 240.1565 | 112.2657 | 105.0964 | 140.8833 | 0.319964  | 0.563032 | 0.502994 | 0.358666 | -0.428993 | 0.623916 |
| AT2G47390 | GEP       | 1048.613 | 918.8867 | 858.8654 | 959.2786 | 751.9004 | 1086.556 | 1347.295 | 1574.1   | 1006.51  | 1008.472 | 889.9934 | 893.9873 | -0.01606  | 0.952138 | 0.462641 | 0.021138 | -0.01711  | 0.975777 |
| AT2G47400 | CP12      | 3295.642 | 3554.218 | 3241.026 | 3470.065 | 3300.412 | 2556.897 | 2579.869 | 2610.914 | 6922.56  | 3420.745 | 3897.879 | 3459.928 | -0.10137  | 0.840551 | 0.236046 | 0.631457 | 0.085113  | 0.930699 |
| AT2G47410 | AT2G47410 | 539.7624 | 544.195  | 518.9247 | 317.9724 | 302.0851 | 441.6005 | 433.0908 | 505.9994 | 265.5389 | 528.7041 | 516.1696 | 465.122  | -0.39895  | 0.010123 | -0.39895 | 0.103685 | -0.08306  | 0.873405 |
| AT2G47420 | AT2G47420 | 343.5932 | 392.5341 | 319.3383 | 319.2097 | 290.8231 | 300.0491 | 295.2488 | 274.038  | 347.5436 | 293.1979 | 296.6645 | 305.5924 | -0.2026   | 0.206001 | -0.19348 | 0.260165 | -0.22717  | 0.360375 |
| AT2G47430 | CK11      | 1.188904 | 0        | 0        | 0.412416 | 0.662467 | 0.996841 | 0.889303 | 2.15778  | 0        | 0.916071 | 0        | 0        | 0.093366  | NA       | 0.262627 | NA       | 0.113049  | NA       |
| AT2G47440 | AT2G47440 | 1087.847 | 986.6881 | 784.1815 | 453.2447 | 469.6893 | 489.4488 | 324.5958 | 541.6027 | 583.7951 | 711.0159 | 645.212  | 614.2926 | -0.9892   | 6.26E-07 | -0.95279 | 2.16E-06 | -0.52127  | 0.070873 |
| AT2G47450 | CAO       | 3099.473 | 3825.423 | 2986.07  | 1961.036 | 1693.929 | 1719.55  | 937.3259 | 1242.881 | 1822.651 | 2786.491 | 2290.835 | 2542.115 | -0.85669  | 3.49E-05 | -1.26826 | 3.09E-10 | -0.36736  | 0.276625 |
| AT2G47460 | MYB12     | 9.511232 | 7.136984 | 5.150617 | 4.536571 | 3.974804 | 0        | 1.778607 | 1.07889  | 0.976246 | 2.878607 | 3.991002 | 4.143626 | -0.81979  | 0.206693 | -1.43191 | 0.025802 | -0.67829  | NA       |
| AT2G47470 | PDIL2     | 1205.549 | 1265.03  | 1269.627 | 4311.805 | 3915.182 | 3973.407 | 2644.789 | 2781.378 | 2876.997 | 1302.09  | 1206.613 | 1189.221 | 1.696346  | 4.31E-81 | 1.143635 | 1.06E-36 | -0.01512  | 0.956388 |
| AT2G47480 | AT2G47480 | 4.755616 | 3.568492 | 0        | 2.062078 | 0        | 4.637271 | 3.987363 | 1.778607 | 1.07889  | 7.809968 | 1.919071 | 2.660668 | 0.193558  | 0.810551 | 0.208449 | 0.808584 | -0.27857  | NA       |
| AT2G47485 | AT2G47485 | 8.323228 | 8.92123  | 9.01358  | 9.485558 | 12.58688 | 15.94945 | 8.003731 | 4.31556  | 8.786214 | 13.4335  | 18.62468 | 10.35907 | 0.410144  | 0.454591 | -0.24216 | 0.714062 | 0.557866  | NA       |
| AT2G47490 | NDT1      | 235.403  | 190.9143 | 204.737  | 216.9306 | 186.1533 | 196.3776 | 95.15547 | 87.39009 | 110.3158 | 213.9764 | 244.7815 | 216.5045 | -0.07424  | 0.725225 | -1.08755 | 2.24E-10 | 0.085766  | 0.819045 |
| AT2G47500 | AT2G47500 | 734.5047 | 248.0102 | 279.421  | 150.9441 | 133.1083 | 305.555  | 149.403  | 178.0168 | 106.4108 | 360.7854 | 328.5925 | 305.5924 | -0.86853  | 0.000111 | -1.02411 | 6.53E-06 | 0.132683  | 0.784151 |
| AT2G47510 | FUM1      | 842.9329 | 826.1059 | 788.0445 | 929.1731 | 1003.638 | 1059.642 | 1068.053 | 1146.86  | 1062.156 | 865.5011 | 887.3328 | 791.4326 | -0.279381 | 0.012867 | 0.411766 | 0.000186 | 0.048978  | 0.850053 |
| AT2G47520 | ERF071    | 0        | 1.784246 | 0        | 0.824831 | 3.974804 | 0.996841 | 0        | 1.07889  | 2.928738 | 0        | 1.330334 | 1.035907 | 0.579114  | 0.384032 | 0.328765 | 0.656784 | 0.088181  | NA       |
| AT2G47530 | AT2G47530 | 0        | 0        | 0        | 0        | 0        | 0        | 0        | 0        | 0        | 0        | 0        | 0        | #N/A      | #N/A     | #N/A     | #N/A     | #N/A      | #N/A     |
| AT2G47540 | AT2G47540 | 0        | 0        | 0        | 0        | 0        | 0        | 0.889303 | 0        | 0        | 0        | 0        | 0        | 0         | 0        | 0.160764 | NA       | 0         | NA       |
| AT2G47550 | PME20     | 2.377808 | 1.784246 | 1.287654 | 4.124156 | 3.312336 | 4.984204 | 12.45025 | 3.23667  | 4.88123  | 0.959536 | 0        | 1.035907 | 0.643711  | 0.353761 | 1.182562 | 0.074522 | -0.47743  | NA       |
| AT2G47560 | ATL64     | 13.07794 | 3.568492 | 3.862963 | 3.299325 | 7.28714  | 1.993682 | 3.557214 | 4.31556  | 1.952492 | 7.67285  | 2.660668 | 4.143626 | -0.49505  | 0.469448 | -0.72503 | 0.295311 | -0.34824  | NA       |
| AT2G47570 | AT2G47570 | 0        | 0        | 1.287654 | 0.412416 | 0.662467 | 0        | 0        | 0        | 0        | 0        | 0        | 0        | -0.00061  | NA       | -0.23664 | NA       | -0.23005  | NA       |
| AT2G47580 | U1A       | 241.3475 | 248.0102 | 269.1198 | 348.4912 | 425.9665 | 325.9669 | 313.0348 | 302.0892 | 441.2632 | 301.2942 | 271.3881 | 325.2747 | 0.52526   | 0.005684 | 0.466233 | 0.01937  | 0.238856  | 0.481582 |
| AT2G47585 | MIR164A   | 0        | 0        | 0        | 0        | 0        | 0        | 0.889303 | 0        | 0        | 0        | 1.330334 | 0        | 0         | NA       | 0.141773 | NA       | 0.183636  | NA       |
| AT2G47590 | PHR2      | 1351.784 | 1168.681 | 1079.054 | 709.7672 | 598.2079 | 678.8486 | 657.1953 | 803.773  | 951.8398 | 1188.865 | 1293.085 | 1032.799 | -0.84149  | 1.81E-07 | -0.56741 | 0.000813 | -0.03496  | 0.935197 |
| AT2G47600 | MHX       | 344.7821 | 437.1403 | 405.6111 | 283.3295 | 255.0499 | 293.0712 | 335.2674 | 381.927  | 235.2753 | 380.9356 | 372.4935 | 335.6337 | -0.49996  | 0.000803 | -0.30832 | 0.140809 | -0.11854  | 0.763186 |
| AT2G47610 | RPL7AA    | 1568.164 | 1614.743 | 1501.405 | 1704.514 | 1758.188 | 1610.895 | 1245.914 | 1325.956 | 1908.561 | 1277.142 | 1008.393 | 1739.646 | 0.112     | 0.663451 | -0.06219 | 0.830884 | -0.20788  | 0.594131 |
| AT2G47620 | SW13A     | 141.4796 | 117.7602 | 150.5877 | 138.5716 | 141.1055 | 164.4787 | 137.842  | 152.1235 | 138.6269 | 150.6471 | 115.7391 | 133.6319 | 0.262968  | 0.206871 | 0.219832 | 0.339697 | -0.13174  | 0.746451 |
| AT2G47630 | AT2G47630 | 117.7015 | 185.5616 | 160.9568 | 179.8132 | 166.2793 | 167.4693 | 107.6057 | 133.7824 | 81.02842 | 200.5429 | 118.3997 | 156.4219 | 0.151795  | 0.606285 | -0.49706 | 0.066027 | 0.049773  | 0.937332 |
| AT2G47640 | AT2G47640 | 145.0643 | 108.839  | 169.9704 | 324.1586 | 382.2436 | 261.1273 | 187.643  | 141.3346 | 374.8785 | 148.728  | 171.6131 | 168.8528 | 1.113422  | 0.000156 | 0.679398 | 0.034639 | 0.185319  | 0.773406 |
| AT2G47650 | UX54      | 319.8152 | 330.0835 | 325.7765 | 444.9964 | 409.4048 | 445.5878 | 447.0833 | 491.9738 | 443.2157 | 303.2133 | 251.4331 | 302.4847 | 0.409893  | 0.002807 | 0.646511 | 0.000855 | -0.17809  | 0.48264  |
| AT2G47660 | AT2G47660 | 0        | 0        | 0        | 0        | 0.662467 | 0        | 0        | 0        | 0        | 0        | 0        | 0        | 0.128567  | 0        | 0        | NA       | 0         | NA       |
| AT2G47670 | AT2G47670 | 1.188904 | 3.568492 | 2.575309 | 1.649662 | 2.649869 | 1.993682 | 2.66791  | 3.23667  | 3.904984 | 3.838143 | 7.982004 | 3.10772  | -0.14826  | 0.856714 | 0.263353 | 0.749876 | 0.64064   | NA       |
| AT2G47680 | AT2G47680 | 89.1678  | 67.80135 | 70.82099 | 74.64722 | 67.57166 | 92.70619 | 73.81219 | 66.89118 | 43.93107 | 53.734   | 65.18636 | 44.54398 | 0.024657  | 0.946313 | -0.29543 | 0.352666 | -0.47267  | 0.277049 |
| AT2G47690 | AT2G47690 | 380.4493 | 326.517  | 408.1864 | 511.3953 | 572.3717 | 500.4114 | 316.592  | 283.7481 | 607.225  | 436.5887 | 513.5089 | 413.3267 | 0.484208  | 0.060301 | 1.082482 | 0.745072 | 0.274795  | 0.541828 |
| AT2G47700 | RFI2      | 505.2842 | 533.4896 | 459.6926 | 323.3338 | 320.6342 | 391.7584 | 378.8433 | 455.2916 | 347.5436 | 461.5366 | 484.2416 | 409.1831 | -0.52817  | 0.00062  | -0.33661 | 0.04571  | -0.14216  | 0.635079 |
| AT2G47710 | AT2G47710 | 594.452  | 729.7566 | 695.3333 | 858.2368 | 794.9607 | 623.0255 | 710.5535 | 747.6707 | 1016.272 | 803.1313 | 850.0834 | 655.7288 | 0.172827  | 0.43241  | 0.287706 | 0.179791 | 0.189419  | 0.594257 |
| AT2G47720 | AT2G47720 | 0        | 0        | 0        | 0        | 0        | 0        | 0        | 0        | 0        | 0        | 0        | 0        | #N/A      | #N/A     | #N/A     | #N/A     | #N/A      | #N/A     |
| AT2G47730 | G5TF8     | 1125.892 | 1206.15  | 1075.191 | 1248.794 | 1291.811 | 1107.49  | 1107.183 | 1224.54  | 1699.644 | 856.8653 | 976.4651 | 884.6642 | 0.098403  | 0.630578 | 0.238889 | 0.211582 | -0.31999  | 0.218983 |
| AT2G47740 | AT2G47740 | 0        | 0        | 0        | 0        | 0        | 0        | 0        | 0        | 0        | 0        | 0        | 0        | #N/A      | #N/A     | #N/A     | #N/A     | #N/A      | #N/A     |
| AT2G47750 | GH3.9     | 148.613  | 149.8767 | 145.5049 | 61.86234 | 43.72284 | 47.84836 | 31.12562 | 24.81447 | 16.59618 | 152.5662 | 155.6491 | 141.9192 | -1.46158  | 1.02E-12 | -2.47731 | 1.38E-25 | 0.02108   | 0.971473 |
| AT2G47760 | ALG3      | 190.2246 | 260.4999 | 251.0926 | 256.1101 | 306.0599 | 310.0175 | 258.7873 | 268.6436 | 224.5366 | 203.4216 | 204.8714 | 170.9246 | 0.30987   | 0.095616 | 0.104649 | 0.651829 | -0.26513  | 0.386949 |
| AT2G47770 | TPO       | 1.188904 | 0        | 0        | 2.886909 | 1.987402 | 6.977885 | 6.225124 | 1.07889  | 6.977885 | 0.995936 | 1.330334 | 0        | 1.087746  | 0.096019 | 1.351351 | 0.039567 | 0.07021   | NA       |
| AT2G47780 | AT2G47780 | 20.21137 | 21.41095 | 20.60247 | 5.361402 | 3.312336 | 3.987363 | 4.446517 | 5.39445  | 5.874746 | 31.66468 | 19.95501 | 13.46678 | -1.8564   | 4.18E-05 | -1.62145 | 0.000733 | 0.083649  | NA       |
| AT2G47790 | AT2G47790 | 155.7464 | 178.4246 | 168.6827 | 173.2145 | 181.516  | 143.5451 | 184.0858 | 168.3068 | 172.7955 | 156.4043 | 150.3277 | 160.5655 | 0.003149  | 0.898928 | 0.068792 | 0.765004 | -0.0963   | 0.794965 |
| AT2G47800 | ABCC4     | 187.8468 | 101.702  | 104.3    | 223.1168 | 196.0903 | 237.2481 | 257.0087 | 381.927  | 242.109  | 93.07496 | 86.47171 | 81.83662 |           |          |          |          |           |          |

|           |           |          |          |            |          |          |          |          |          |          |           |          |          |           |          |          |          |          |          |
|-----------|-----------|----------|----------|------------|----------|----------|----------|----------|----------|----------|-----------|----------|----------|-----------|----------|----------|----------|----------|----------|
| AT3G01142 | AT3G01142 | 10.70014 | 7.136984 | 10.30123   | 6.598649 | 3.974804 | 7.974726 | 6.225124 | 7.55223  | 5.857476 | 9.595356  | 5.321336 | 7.251346 | -0.5118   | 0.374671 | -0.42828 | 0.502628 | -0.26756 | NA       |
| AT3G01150 | PTB       | 297.226  | 299.7533 | 302.5988   | 284.9792 | 282.8735 | 310.0175 | 321.0386 | 283.7481 | 258.7052 | 274.4272  | 260.7455 | 273.4793 | -0.03862  | 0.833614 | -0.05642 | 0.771151 | -0.14998 | 0.573168 |
| AT3G01160 | AT3G01160 | 296.0371 | 233.7362 | 225.3395   | 220.2299 | 272.24   | 238.2449 | 210.6633 | 223.0402 | 227.6403 | 234.1267  | 214.1838 | 221.6684 | -0.0545   | 0.788325 | -0.17352 | 0.388176 | -0.17298 | 0.581939 |
| AT3G01170 | AT3G01170 | 193.7913 | 256.9314 | 234.3531   | 311.7862 | 355.7449 | 343.9101 | 419.7512 | 403.5048 | 348.5198 | 196.7048  | 296.6645 | 197.8581 | 0.552857  | 0.004    | 0.762311 | 5.44E-05 | 0.010054 | 0.986597 |
| AT3G01175 | AT3G01175 | 0        | 1.784246 | 0          | 13.1973  | 7.949607 | 22.92734 | 45.35448 | 51.78672 | 25.3824  | 0.995936  | 2.660668 | 0        | 2.353083  | 1.62E-05 | 3.692491 | 1.71E-12 | 0.104801 | 0        |
| AT3G01180 | SS2       | 578.9962 | 380.0444 | 0.124094   | 251.5735 | 237.8258 | 273.1344 | 261.4552 | 298.8525 | 211.8454 | 480.7273  | 494.8842 | 422.6499 | -0.83347  | 0.08E-06 | -0.81245 | 5.3E-05  | 0.022123 | 0.965702 |
| AT3G01185 | AT3G01185 | 0        | 0        | 0          | 0        | 0        | 0        | 0        | 0        | 0        | 0         | 0        | 0        | #N/A      | #N/A     | #N/A     | #N/A     | #N/A     | #N/A     |
| AT3G01190 | PER27     | 0        | 1.784246 | 0          | 0        | 0        | 0        | 0        | 0        | 0        | 0         | 0        | 0        | -0.2184   | NA       | -0.20558 | NA       | -0.19918 | NA       |
| AT3G01200 | RP2       | 34.47821 | 33.90067 | 27.04074   | 47.42779 | 58.95959 | 53.8294  | 48.91169 | 35.60337 | 63.45599 | 17.27164  | 27.93701 | 23.82585 | 0.700561  | 0.026994 | 0.599507 | 0.081212 | -0.44136 | 0.458434 |
| AT3G01202 | AT3G01202 | 1.188904 | 1.784246 | 2.575309   | 2.062078 | 1.324935 | 1.993682 | 2.66791  | 1.07889  | 0.976246 | 0.195596  | 0        | 0        | 0.027462  | 0.974551 | -0.07364 | 0.933598 | -0.67727 | NA       |
| AT3G01210 | AT3G01210 | 148.613  | 158.7979 | 175.121    | 120.4253 | 109.9696 | 120.6177 | 96.93408 | 124.0723 | 130.817  | 165.9997  | 192.8984 | 137.7756 | -0.44759  | 0.020497 | -0.44708 | 0.034887 | 0.035408 | 0.945973 |
| AT3G01220 | ATHB-20   | 3.566712 | 3.568492 | 9.01358    | 3.299325 | 2.649869 | 3.987363 | 3.557214 | 3.23667  | 7.809968 | 7.676285  | 7.982004 | 6.215439 | -0.52924  | 0.421913 | -0.11507 | 0.887897 | 0.310994 | NA       |
| AT3G01230 | AT3G01230 | 0        | 1.784246 | 0          | 0        | 0        | 0        | 0        | 0        | 0        | 0         | 0        | 0        | -0.2184   | NA       | -0.20558 | NA       | -0.19918 | NA       |
| AT3G01240 | AT3G01240 | 0        | 5.352738 | 0          | 0        | 0        | 0        | 0        | 0        | 0        | 0         | 0        | 1.035907 | -0.65802  | NA       | -0.626   | NA       | -0.44134 | NA       |
| AT3G01250 | AT3G01250 | 1.188904 | 1.784246 | 0          | 0        | 0        | 0        | 0        | 0        | 0        | 0         | 0        | 0        | -0.49674  | NA       | -0.47297 | NA       | -0.46632 | NA       |
| AT3G01260 | AT3G01260 | 0        | 0        | 0          | 1.324935 | 0        | 0        | 0        | 0        | 0        | 0         | 1.330334 | 0        | 0.198245  | NA       | 0        | NA       | 0.170125 | NA       |
| AT3G01270 | AT3G01270 | 0        | 8.92123  | 0          | 0        | 0.996841 | 0        | 0        | 0        | 0        | 0         | 0        | 2.071813 | -0.24029  | 0.502207 | -0.27522 | 0.453298 | -0.19844 | NA       |
| AT3G01280 | VDA C1    | 1092.603 | 1134.78  | 1211.683   | 1466.962 | 1571.372 | 1394.58  | 1148.98  | 1229.935 | 1820.699 | 1061.246  | 908.6181 | 1081.486 | 0.359069  | 0.051152 | 0.282237 | 0.15476  | -0.16815 | 0.615423 |
| AT3G01290 | H1R3      | 463.6725 | 772.5785 | 558.842    | 3307.573 | 3284.513 | 4010.29  | 3370.46  | 3693.04  | 3986.012 | 251.3983  | 343.2262 | 343.921  | 2.503407  | 6.2E-45  | 2.561821 | 4.16E-47 | -0.90505 | 6.48E-05 |
| AT3G01300 | AT3G01300 | 129.5905 | 110.6233 | 124.9025   | 103.1039 | 87.44568 | 74.76306 | 82.70522 | 92.78453 | 103.4821 | 103.6298  | 87.80204 | 120.1652 | -0.43431  | 0.047609 | -0.38433 | 0.106753 | -0.22106 | 0.582115 |
| AT3G01310 | AT3G01310 | 1580.053 | 1527.315 | 1362.338   | 1070.218 | 997.6757 | 1267.981 | 1863.98  | 1972.211 | 1274.001 | 1208.055  | 1423.457 | 1372.576 | -0.41446  | 0.023564 | 0.189235 | 0.372928 | -0.15576 | 0.651245 |
| AT3G01311 | AT3G01311 | 0        | 1.287654 | 0.824831   | 1.324935 | 0        | 0        | 0        | 0        | 0        | 0         | 0        | 0        | 0.189063  | NA       | -0.23856 | NA       | -0.2295  | NA       |
| AT3G01313 | AT3G01313 | 0        | 0        | 0.412416   | 1.324935 | 1.993682 | 0.889303 | 0        | 0.976246 | 0        | 1.330334  | 0        | 0        | 0.627244  | NA       | 0.32974  | NA       | 0.195026 | NA       |
| AT3G01316 | AT3G01316 | 0        | 0        | 1.287654   | 0.824831 | 0.662467 | 0.996841 | 1.778607 | 0        | 0.995936 | 0         | 1.035907 | 0        | 0.190861  | NA       | 0.077885 | NA       | 0.11754  | NA       |
| AT3G01319 | AT3G01319 | 3.566712 | 0        | 2.575309   | 0.412416 | 0.662467 | 3.987363 | 1.778607 | 1.07889  | 0.976246 | 0.1919071 | 1.330334 | 2.071813 | -0.325104 | 0.741069 | -0.37837 | 0.686411 | -0.12481 | NA       |
| AT3G01320 | SNL1      | 558.7849 | 520.9998 | 500.8975   | 360.0388 | 392.1806 | 440.6036 | 510.4602 | 564.2594 | 311.4225 | 416.4385  | 425.7069 | 516.9174 | -0.39782  | 0.066749 | -0.18493 | 0.465705 | -0.21161 | 0.584143 |
| AT3G01322 | AT3G01322 | 0        | 0        | 0          | 0.662467 | 0        | 0        | 0        | 0        | 0        | 0         | 0        | 0        | 0.128567  | NA       | 0        | NA       | 0        | NA       |
| AT3G01323 | AT3G01323 | 0        | 0        | 0          | 0        | 0        | 0        | 0        | 0        | 0        | 0         | 0        | 0        | #N/A      | #N/A     | #N/A     | #N/A     | #N/A     | #N/A     |
| AT3G01324 | AT3G01324 | 0        | 0        | 0          | 0        | 0        | 0        | 0        | 0        | 0        | 0         | 0        | 0        | #N/A      | #N/A     | #N/A     | #N/A     | #N/A     | #N/A     |
| AT3G01325 | AT3G01325 | 0        | 0        | 0          | 0        | 0        | 0.889303 | 0        | 0        | 0        | 0         | 0        | 0        | 0         | NA       | 0.160764 | NA       | 0        | NA       |
| AT3G01326 | AT3G01326 | 0        | 0        | 0          | 0        | 0        | 0        | 0        | 0        | 0        | 0         | 0        | 0        | #N/A      | #N/A     | #N/A     | #N/A     | #N/A     | #N/A     |
| AT3G01327 | AT3G01327 | 0        | 0        | 0          | 0        | 0        | 0        | 0        | 0        | 0        | 0         | 0        | 0        | #N/A      | #N/A     | #N/A     | #N/A     | #N/A     | #N/A     |
| AT3G01328 | AT3G01328 | 0        | 0        | 0          | 0        | 0        | 0        | 0        | 0        | 0        | 0         | 0        | 0        | #N/A      | #N/A     | #N/A     | #N/A     | #N/A     | #N/A     |
| AT3G01329 | AT3G01329 | 0        | 0        | 0          | 0        | 0        | 0        | 0        | 0        | 0        | 0         | 0        | 0        | #N/A      | #N/A     | #N/A     | #N/A     | #N/A     | #N/A     |
| AT3G01330 | E2FF      | 24.96698 | 24.97944 | 28.3284    | 28.45667 | 27.16116 | 23.92418 | 27.56841 | 24.81447 | 27.33489 | 24.94793  | 25.27635 | 34.18492 | 0.032376  | 0.943467 | 0.023423 | 0.961588 | 0.101566 | 0.899616 |
| AT3G01331 | AT3G01331 | 0        | 0        | 0          | 0.662467 | 0        | 0        | 0        | 0        | 0        | 0         | 0        | 0        | 0.128567  | NA       | 0        | NA       | 0        | NA       |
| AT3G01340 | SEC13A    | 546.8958 | 592.3697 | 554.979    | 628.5213 | 584.2961 | 575.1771 | 473.9988 | 518.9461 | 683.3722 | 552.6925  | 618.6053 | 544.8868 | 0.079541  | 0.679847 | -0.01397 | 0.950674 | 0.018255 | 0.965702 |
| AT3G01345 | AT3G01345 | 2.377808 | 0        | 1.287654   | 8.660727 | 8.612075 | 0        | 3.57214  | 14.02557 | 3.904984 | 0.995936  | 0        | 1.035907 | 1.045733  | 0.113821 | 1.174652 | 0.082298 | -0.26182 | NA       |
| AT3G01350 | NPF5-9    | 15.45575 | 10.70548 | 9.01358    | 8.248311 | 9.01358  | 6.24673  | 9.968408 | 8.003731 | 9.710009 | 8.57476   | 24.94793 | 7.982004 | -0.44036  | 0.429209 | -0.47837 | 0.424089 | 0.413496 | NA       |
| AT3G01360 | AT3G01360 | 86.78999 | 87.5605  | 98.15491   | 131.831  | 100.6809 | 108.495  | 96.0212  | 88.83839 | 60.45074 | 115.7391  | 100.4829 | 0        | 0.256168  | 0.365486 | 0.091563 | 0.793652 | -0.00345 | 0.996198 |
| AT3G01370 | ATCFM2    | 1272.127 | 1172.25  | 1108.67    | 678.4236 | 689.6284 | 775.544  | 985.3483 | 1023.867 | 783.9255 | 1337.593  | 1501.947 | 1251.375 | -0.72196  | 1.34E-07 | -0.72196 | 0.023007 | 0.19946  | 0.410374 |
| AT3G01380 | AT3G01380 | 223.5139 | 224.815  | 213.7506   | 147.2324 | 180.1911 | 186.4092 | 160.0746 | 183.4113 | 128.8645 | 229.329   | 207.5321 | 223.7558 | -0.36783  | 0.044753 | -0.47804 | 0.011025 | 0.000294 | 0.99927  |
| AT3G01390 | VHA-G1    | 941.6119 | 961.7086 | 1117.684   | 1367.982 | 1583.959 | 1175.275 | 1156.984 | 1011.999 | 2228.77  | 1372.136  | 2127.204 | 1545.573 | 0.428632  | 0.131177 | 0.092874 | 0.678588 | -0.35569 | 0.235234 |
| AT3G01400 | AT3G01400 | 135.535  | 153.4452 | 112.0259   | 149.7069 | 137.7932 | 135.5703 | 130.7276 | 118.6779 | 128.8645 | 108.4275  | 98.44471 | 101.5188 | 0.092874  | 0.678588 | -0.05698 | 0.784758 | -0.35569 | 0.235234 |
| AT3G01410 | AT3G01410 | 34.47821 | 48.17464 | 37.34198   | 41.65397 | 50.34751 | 46.85152 | 25.7798  | 36.68226 | 32.21612 | 39.34096  | 42.57069 | 34.18492 | 0.21467   | 0.520365 | -0.3089  | 0.391843 | -0.02998 | 0.971473 |
| AT3G01420 | DOX1      | 3.566712 | 1.784246 | 55.36914   | 238.7886 | 226.5638 | 337.929  | 135.1741 | 99.25787 | 59.55101 | 0         | 1.330334 | 2.071813 | 0.213694  | 0.000617 | 1.16025  | 0.887473 | -0.85387 | 0.421683 |
| AT3G01430 | AT3G01430 | 16.64466 | 16.05821 | 28.3284    | 44.54088 | 32.4609  | 35.88627 | 27.56841 | 37.76115 | 63.45599 | 34.54328  | 11.97301 | 29.00538 | 0.774416  | 0.06415  | 0.934223 | 0.028014 | 0.272181 | 0.751022 |
| AT3G01435 | MED11     | 80.84547 | 78.50683 | 87.5605    | 105.9908 | 120.569  | 87.72199 | 90.70896 | 58.26006 | 125.9357 | 87.31774  | 115.7391 | 79.7648  | 0.334358  | 0.267187 | 1.48041  | 0.681303 | 0.175628 | 0.762813 |
| AT3G01440 | PNSL3     | 97.49012 | 110.6233 | 96.57408   | 51.55195 | 65.58426 | 52.83256 | 206.3184 | 201.7524 | 328.0187 | 118.0229  | 117.0694 | 147.0987 | -0.80386  | 0.001156 | 1.234729 | 5.56E-08 | 0.32067  | 0.45099  |
| AT3G01450 | AT3G01450 | 97.49012 | 96.34929 | 127.4778   | 81.65828 | 74.19633 | 70.7757  | 75.5908  | 78.75897 | 70.28971 | 99.79171  | 107.7571 | 92.19568 | -0.48426  | 0.021667 | -0.50729 | 0.024020 | -0.10649 | 0.817807 |
| AT3G01460 | MBD9      | 455.3502 | 374.6117 | 319.2      | 156.7179 | 147.0677 | 204.3524 | 207.2077 | 266.4858 | 140.5794 | 261.9532  | 280.7005 | 305.5924 | -1.13512  | 3.57E-07 | -0.86627 | 0.000186 | -0.41606 | 0.255022 |
| AT3G01470 | HAT5      | 0        | 0        | 0          | 0        | 0        | 0        | 0        | 0        | 0        | 0         | 0        | 0        | #N/A      | #N/A     | #N/A     | #N/A     | #N/A     | #N/A     |
| AT3G01472 | CPuORF33  | 0        | 0        | 0          | 0        | 0        | 0        | 0        | 0        | 0        | 0         | 0        | 0        | #N/A      | #N/A     | #N/A     | #N/A     | #N/A     | #N/A     |
| AT3G01480 | CYP38     | 2696.434 | 2849.441 | 2794.21    | 1350.249 | 1262.663 | 1367.666 | 1738.588 | 1847.06  | 1882.202 | 2907.393  | 2929.395 | 2872.569 | -1.06156  | 7.92E-40 | -0.60576 | 1.99E-13 | 0.062752 | 0.721971 |
| AT3G01490 | AT3G01490 | 450.5946 | 558.469  | 515.0617   | 353.4401 | 391.5182 | 344.9069 | 276.5734 | 280.5114 | 425.6433 | 375.1784  | 441.6709 | 396.7522 | -0.4696   | 0.012219 | -0.61583 | 0.001024 | -0.3203  | 0.278963 |
| AT3G01500 | BCA1      | 14580.72 | 13119.56 | 12298.39   | 3548.836 | 3175.868 | 3038.371 | 8374.571 | 9352.897 | 605.9189 | 12349.22  | 11583.22 | 12960.14 | -0.21547  | 7.01E-80 | -0.54437 | 1.47E-06 | -0.1179  | 0.588611 |
| AT3G01510 | LSF1      | 231.8363 | 174.8561 | 164.8198</ |          |          |          |          |          |          |           |          |          |           |          |          |          |          |          |

|           |           |          |          |          |           |          |          |          |          |          |          |          |           |           |           |           |          |          |          |
|-----------|-----------|----------|----------|----------|-----------|----------|----------|----------|----------|----------|----------|----------|-----------|-----------|-----------|-----------|----------|----------|----------|
| AT3G01960 | AT3G01960 | 13.07794 | 7.136984 | 3.862963 | 8.248311  | 7.28714  | 6.977885 | 4.446517 | 5.39445  | 6.833722 | 6.716749 | 11.97301 | 15.5386   | -0.08428  | 0.904232  | -0.42076  | 0.524964 | 0.383178 | NA       |
| AT3G01961 | AT3G01961 | 0        | 0        | 0        | 0         | 0        | 0        | 0        | 0        | 0        | 0        | 0        | 0         | 0.064603  | NA        | 0.150774  | NA       | 0.218881 | 0.764095 |
| AT3G01970 | WRKY45    | 9.511232 | 17.84246 | 24.46543 | 93.61824  | 78.83361 | 92.70619 | 130.7276 | 145.6501 | 158.1519 | 22.06932 | 21.28534 | 18.64632  | 2.197332  | 1.02E-14  | 2.887861  | 4.56E-25 | 0.218881 | 0.764095 |
| AT3G01980 | AT3G01980 | 234.2141 | 198.0513 | 180.2716 | 199.6091  | 183.5034 | 163.4819 | 149.403  | 169.3857 | 157.1756 | 211.0978 | 244.7815 | 219.6122  | -0.15529  | 0.428058  | -0.36241  | 0.053603 | 0.131245 | 0.700921 |
| AT3G01990 | ACR6      | 16.64466 | 23.1952  | 18.02716 | 13.1973   | 13.91181 | 20.93366 | 20.45398 | 20.49891 | 19.52492 | 14.39303 | 18.62468 | 13.46678  | -0.26281  | 0.567565  | -0.080595 | 0.884111 | -0.27278 | 0.742107 |
| AT3G02000 | GRXC7     | 1.188904 | 7.136984 | 3.862963 | 5.361402  | 7.28714  | 4.984204 | 2.778607 | 2.15778  | 6.833722 | 2.878607 | 2.660668 | 4.143626  | -0.447925 | 0.519931  | -0.06097  | 0.943732 | -0.14324 | NA       |
| AT3G02010 | PCMP-H36  | 16.64466 | 23.1952  | 25.75309 | 31.34358  | 25.17376 | 16.94629 | 20.01119 | 40.99782 | 25.3824  | 19.19071 | 14.63367 | 19.68222  | 0.192266  | 0.679362  | 0.418553  | 0.351528 | -0.24022 | 0.774553 |
| AT3G02020 | AK3       | 2054.426 | 1391.712 | 1621.157 | 992.7179  | 849.9455 | 975.9071 | 969.3408 | 1069.18  | 748.7807 | 257.7313 | 2415.886 | 1988.941  | -0.82484  | 4.19E-06  | -0.84406  | 3.24E-06 | 0.450711 | 0.085758 |
| AT3G02030 | AT3G02030 | 34.47821 | 23.1952  | 29.61605 | 22.27044  | 21.19895 | 26.9147  | 33.79353 | 29.13003 | 6.833722 | 48.93632 | 42.57069 | 43.50807  | -0.30396  | 0.507232  | -0.29839  | 0.54619  | 0.557473 | 0.388952 |
| AT3G02040 | GDDP1     | 32.10041 | 30.33218 | 38.62963 | 37.7468   | 113.9444 | 161.4882 | 92.48756 | 111.1257 | 81.02842 | 28.78067 | 31.92802 | 32.1131   | 1.924942  | 6.76E-15  | 1.403374  | 7.17E-08 | -0.13145 | 0.849794 |
| AT3G02050 | POT4      | 458.9169 | 399.6711 | 408.1864 | 281.6798  | 240.4756 | 333.9417 | 330.8209 | 388.4004 | 229.4178 | 380.9356 | 312.6285 | 323.2028  | -0.55519  | 0.066877  | -0.40826  | 0.06522  | -0.30811 | 0.364823 |
| AT3G02060 | AT3G02060 | 414.9275 | 376.4759 | 391.4469 | 296.5268  | 285.5234 | 331.948  | 426.8657 | 421.846  | 309.47   | 379.0166 | 367.1722 | 395.7163  | -0.37215  | 0.02091   | -0.03193  | 0.887113 | -0.05121 | 0.891692 |
| AT3G02065 | RH41      | 126.0238 | 153.4452 | 162.2444 | 149.2944  | 149.7176 | 108.6556 | 120.056  | 126.2301 | 104.4583 | 160.2424 | 130.3727 | 120.1652  | -0.09514  | 0.714589  | -0.31958  | 0.182417 | -0.09394 | 0.846712 |
| AT3G02070 | AT3G02070 | 92.73451 | 74.93833 | 81.12222 | 167.0283  | 147.0677 | 154.5103 | 170.7463 | 160.7546 | 113.2445 | 59.49121 | 97.11438 | 71.47755  | 0.875695  | 0.000112  | 0.799543  | 0.000693 | -0.1449  | 0.782808 |
| AT3G02080 | RPS19A    | 1172.259 | 1199.013 | 1277.353 | 1676.057  | 1593.896 | 1427.476 | 1198.781 | 1200.805 | 1938.825 | 1166.795 | 800.8611 | 1416.084  | 0.352679  | 0.105602  | 0.241325  | 0.368558 | -0.10394 | 0.838892 |
| AT3G02090 | MPPBETA   | 2075.826 | 1941.26  | 1926.331 | 1741.631  | 1591.909 | 1744.471 | 1506.48  | 1702.488 | 1547.35  | 1689.742 | 1756.041 | 1701.994  | -0.22628  | 0.027049  | -0.32057  | 0.001542 | -0.20697 | 0.169389 |
| AT3G02100 | UGT83A1   | 0        | 0        | 0        | 0         | 0        | 0        | 0        | 0        | 0        | 0.976246 | 0        | 0.1035907 | 0         | NA        | 0.14724   | NA       | 0.156349 | NA       |
| AT3G02110 | SCLP25    | 288.9037 | 297.9691 | 278.1333 | 221.4672  | 180.8536 | 220.3018 | 173.4142 | 215.778  | 179.6293 | 353.1091 | 309.9678 | 273.4793  | -0.46423  | 0.005887  | -0.59452  | 0.000525 | 0.11564  | 0.737047 |
| AT3G02120 | AT3G02120 | 41.61164 | 33.90067 | 59.2321  | 104.3411  | 123.8814 | 75.7599  | 65.80846 | 44.23449 | 104.4583 | 89.23681 | 67.84703 | 66.29802  | 1.081579  | 0.00069   | 0.604913  | 0.093318 | 0.660137 | 0.186769 |
| AT3G02125 | AT3G02125 | 3.566712 | 0        | 0        | 1.237247  | 0.662467 | 0.996841 | 0.889303 | 0        | 0.976246 | 1.919071 | 1.330334 | 2.071813  | -0.1493   | 0.849649  | -0.3129   | 0.681923 | 0.198114 | NA       |
| AT3G02130 | RPK2      | 21.07101 | 272.9862 | 216.3259 | 157.1303  | 138.4557 | 175.444  | 189.2146 | 240.5925 | 141.5557 | 209.1788 | 195.5591 | 183.3555  | -0.6737   | 0.000962  | -0.40047  | 0.075412 | -0.35739 | 0.821218 |
| AT3G02140 | AFP4      | 15.45755 | 7.136984 | 3.862963 | 15.230769 | 16.56168 | 36.88311 | 24.9005  | 18.34113 | 34.16681 | 10.55489 | 10.64267 | 9.323159  | 0.860728  | 0.002614  | 0.898789  | 0.054535 | -0.26187 | 0.790575 |
| AT3G02150 | TCP13     | 97.49012 | 162.3664 | 131.3407 | 304.7751  | 252.4    | 294.068  | 224.9938 | 196.358  | 120.0783 | 134.335  | 113.0784 | 126.3806  | 1.091461  | 3.35E-06  | 0.46187   | 0.088304 | -0.04826 | 0.941716 |
| AT3G02160 | AT3G02160 | 41.61164 | 44.2129  | 36.05432 | 37.94223  | 36.4357  | 43.86099 | 40.90796 | 37.76115 | 41.00233 | 33.58375 | 21.28534 | 22.78994  | -0.02892  | 0.940708  | -0.00111  | 0.998299 | -0.56687 | 0.245429 |
| AT3G02170 | LN2       | 1119.948 | 1182.277 | 897.4951 | 715.1286  | 678.3665 | 847.3147 | 686.5423 | 903.0309 | 580.8664 | 376.0565 | 878.0204 | 815.25894 | -0.48849  | 0.0069    | -0.53263  | 0.003693 | -0.29358 | 0.311054 |
| AT3G02180 | SP13      | 164.0687 | 215.8938 | 206.0247 | 306.4248  | 304.7349 | 205.3492 | 213.4328 | 182.3324 | 375.5447 | 243.722  | 224.8264 | 303.5206  | 0.462794  | 0.103344  | 0.380988  | 0.214198 | 0.492401 | 0.401914 |
| AT3G02190 | RPL39B    | 49.93397 | 53.52738 | 50.21852 | 200.434   | 166.9418 | 98.68724 | 72.92289 | 84.15342 | 156.1994 | 74.84378 | 87.80204 | 62.15439  | 1.495841  | 1.51E-06  | 0.469229  | 0.004839 | 0.387081 | 0.368268 |
| AT3G02200 | AT3G02200 | 1062.88  | 1049.137 | 1091.931 | 953.5048  | 1054.648 | 1101.509 | 1154.316 | 988.2632 | 98.7214  | 1007.512 | 951.1888 | 976.8599  | -0.04542  | 0.767979  | -0.05561  | 0.731039 | -0.12482 | 0.580478 |
| AT3G02210 | COB11     | 47.55616 | 41.03766 | 39.91728 | 64.74925  | 51.00998 | 51.83572 | 49.00978 | 40.99782 | 38.07359 | 47.97678 | 49.22236 | 44.54398  | 0.37589   | 0.19415   | 0.000969  | 0.998157 | 0.125028 | 0.845772 |
| AT3G02220 | AT3G02220 | 294.8482 | 314.0273 | 370.8445 | 468.9165  | 497.5129 | 410.6984 | 391.2935 | 329.0614 | 490.0755 | 297.456  | 375.1542 | 341.8492  | 0.482183  | 0.009129  | 0.298499  | 0.1478   | 0.045521 | 0.921904 |
| AT3G02230 | RGP1      | 511.2287 | 401.4554 | 410.7617 | 440.8722  | 474.989  | 445.5878 | 342.3818 | 392.7159 | 338.7574 | 356.9473 | 352.5385 | 345.9928  | 0.035207  | 0.847794  | -0.30428  | 0.046306 | -0.32716 | 0.11624  |
| AT3G02240 | RGF7      | 0        | 0        | 1.287654 | 1.649622  | 0        | 2.990522 | 0.889303 | 2.15778  | 0.976246 | 0        | 0        | 0         | 0.485723  | 0.4549399 | 0.389619  | 0.564581 | -0.2717  | NA       |
| AT3G02242 | AT3G02242 | 0        | 0        | 0        | 0         | 0        | 0        | 0        | 0        | 0        | 0        | 0        | 0         | #N/A      | #N/A      | #N/A      | #N/A     | #N/A     | #N/A     |
| AT3G02250 | AT3G02250 | 479.1283 | 499.5889 | 508.6235 | 326.2207  | 312.0221 | 340.9195 | 278.352  | 321.5092 | 219.6553 | 463.4557 | 413.7339 | 536.5996  | -0.59351  | 0.000199  | -0.84545  | 1.11E-07 | -0.06907 | 0.853811 |
| AT3G02260 | BIG       | 2314.796 | 1438.102 | 1103.52  | 533.2533  | 557.7974 | 659.9086 | 735.454  | 988.2632 | 731.2082 | 1021.905 | 1084.222 | 1032.799  | -1.41992  | 1.4E-10   | -0.94962  | 3.64E-05 | -0.60781 | 0.058335 |
| AT3G02270 | AT3G02270 | 0        | 1.287654 | 1.649622 | 0.662467  | 0        | 0.889303 | 0        | 0        | 0        | 0        | 0        | 0         | 0.218902  | NA        | -0.06873  | NA       | -0.23341 | NA       |
| AT3G02280 | ATR3      | 99.86793 | 117.7602 | 99.14938 | 106.8156  | 85.45828 | 128.5925 | 134.2848 | 110.0468 | 85.90965 | 68.12703 | 75.82904 | 76.65708  | 0.016696  | 0.95922   | 0.068356  | 0.835055 | -0.49584 | 0.179491 |
| AT3G02290 | AT3G02290 | 128.4016 | 144.5239 | 155.8062 | 117.9509  | 158.9921 | 124.6051 | 104.9378 | 94.94231 | 147.4131 | 138.7131 | 138.3547 | 132.5976  | -0.09112  | 0.736213  | -0.29119  | 0.245845 | -0.06385 | 0.902607 |
| AT3G02300 | AT3G02300 | 414.9275 | 390.7499 | 373.4198 | 406.6418  | 358.3948 | 398.7363 | 447.3197 | 415.3726 | 341.6861 | 363.664  | 331.2532 | 457.8706  | -0.01884  | 0.93533   | -0.02951  | 0.899772 | -0.02992 | 0.946773 |
| AT3G02310 | SEP2      | 42.80054 | 46.3904  | 21.89012 | 15.25938  | 12.58688 | 4.984204 | 17.78607 | 19.42002 | 11.71495 | 64.28889 | 57.20436 | 37.29264  | -1.46827  | 0.000145  | -1.0359   | 0.01225  | 0.490185 | 0.449379 |
| AT3G02315 | AT3G02315 | 0        | 0        | 0        | 0         | 0        | 0        | 0        | 0        | 0        | 0        | 0        | 0         | #N/A      | #N/A      | #N/A      | #N/A     | #N/A     | #N/A     |
| AT3G02320 | AT3G02320 | 161.6909 | 167.7191 | 157.0938 | 183.9373  | 166.2793 | 161.4882 | 160.0746 | 171.5435 | 120.0783 | 154.4852 | 170.2827 | 131.5601  | 0.079268  | 0.738538  | -0.10374  | 0.677123 | -0.09272 | 0.83156  |
| AT3G02330 | PCMP-E90  | 17.83356 | 14.27397 | 19.31482 | 16.49662  | 16.56168 | 22.92734 | 23.12189 | 26.97225 | 21.47741 | 21.10978 | 14.63367 | 17.61041  | 0.060816  | 0.905552  | 0.411067  | 0.363605 | 0.044075 | 0.967712 |
| AT3G02335 | AT3G02335 | 0        | 0        | 0        | 0.662467  | 0        | 0        | 0        | 0        | 0        | 0        | 0        | 0         | 0.128567  | NA        | 0.03660   | 0        | 0        | NA       |
| AT3G02340 | AT3G02340 | 133.1572 | 117.7602 | 139.0667 | 121.2502  | 106.6572 | 133.5767 | 107.6057 | 148.8868 | 154.2629 | 87.31774 | 66.5167  | 104.6266  | -0.11547  | 0.669056  | 0.06437   | 0.833998 | -0.56729 | 0.076473 |
| AT3G02350 | GAU79     | 718.098  | 738.6779 | 637.3889 | 527.0671  | 516.7245 | 639.9718 | 544.2537 | 537.2872 | 525.2203 | 621.7791 | 679.8007 | 561.4616  | -0.31412  | 0.026199  | -0.37579  | 0.008927 | -0.16692 | 0.500570 |
| AT3G02360 | AT3G02360 | 747.8206 | 702.9929 | 690.1827 | 753.4833  | 684.9912 | 754.6085 | 667.8669 | 783.2741 | 836.6428 | 631.3744 | 595.9896 | 624.6516  | 0.033353  | 0.839498  | 0.092923  | 0.555143 | -0.20687 | 0.314709 |
| AT3G02370 | AT3G02370 | 41.61164 | 41.03766 | 24.46543 | 21.03319  | 18.54908 | 25.91786 | 36.4414  | 45.31338 | 16.59618 | 26.867   | 31.92802 | 51.79533  | -0.64255  | 0.115428  | -0.10671  | 0.841726 | 0.050938 | 0.960974 |
| AT3G02380 | COL2      | 480.3172 | 601.2909 | 512.4864 | 162.9042  | 160.9795 | 151.5198 | 121.8646 | 121.9146 | 64.43224 | 19.7678  | 465.6169 | 420.5781  | -1.69558  | 1.5E-20   | -2.29978  | 6.1E-34  | -0.21429 | 0.543164 |
| AT3G02390 | AT3G02390 | 36.85602 | 12.48972 | 14.1642  | 30.10634  | 52.99738 | 41.86731 | 54.24751 | 31.28781 | 55.64022 | 35.50282 | 31.92802 | 33.14901  | -0.18505  | 0.038392  | 0.990136  | 0.01302  | 0.541509 | 0.417269 |
| AT3G02400 | AT3G02400 | 112.9459 | 90.99655 | 66.95803 | 77.12171  | 84.13334 | 7        |          |          |          |          |          |           |           |           |           |          |          |          |

|           |           |          |          |          |          |          |          |          |          |          |          |          |          |          |          |           |          |          |          |
|-----------|-----------|----------|----------|----------|----------|----------|----------|----------|----------|----------|----------|----------|----------|----------|----------|-----------|----------|----------|----------|
| AT3G02875 | ILR1      | 68.95643 | 71.36984 | 70.82099 | 99.39215 | 96.72022 | 101.6778 | 105.8271 | 87.39009 | 83.95716 | 76.76285 | 71.83803 | 73.54936 | 0.481848 | 0.024953 | 0.385498  | 0.105196 | 0.07396  | 0.888347 |
| AT3G02880 | AT3G02880 | 305.5483 | 265.8527 | 233.0654 | 199.6091 | 202.0525 | 239.2414 | 193.8642 | 212.5413 | 209.8929 | 221.6527 | 206.2018 | 207.1813 | -0.33304 | 0.044161 | -0.38097  | 0.027232 | -0.33567 | 0.175601 |
| AT3G02885 | GASAs     | 10.70014 | 1.784246 | 16.73951 | 29.28151 | 33.78583 | 20.93366 | 24.01119 | 19.42002 | 37.09735 | 18.23118 | 27.93701 | 18.64632 | 1.230885 | 0.004165 | 1.159348  | 0.010028 | 0.86065  | 0.205441 |
| AT3G02890 | AT3G02890 | 216.3805 | 198.0513 | 202.1617 | 117.5384 | 122.5564 | 128.5925 | 167.1891 | 153.2024 | 152.2944 | 207.2597 | 204.8714 | 200.9659 | -0.74112 | 6.65E-07 | -0.37887  | 0.022127 | -0.01102 | 0.981084 |
| AT3G02900 | AT3G02900 | 259.1811 | 280.1266 | 320.6259 | 348.0787 | 335.8709 | 331.948  | 257.0087 | 264.328  | 442.2394 | 343.5138 | 347.6799 | 345.9928 | 0.233466 | 0.336609 | 0.15876   | 0.558008 | 0.375695 | 0.274581 |
| AT3G02910 | AT3G02910 | 108.1903 | 121.3287 | 97.86173 | 90.73143 | 109.3071 | 112.643  | 117.3881 | 140.2557 | 177.6758 | 139.1327 | 139.6851 | 99.44703 | -0.06814 | 0.819595 | 0.402271  | 0.105005 | 0.204653 | 0.643032 |
| AT3G02920 | RPAB2     | 58.25629 | 67.80135 | 83.69753 | 89.80176 | 98.70762 | 92.70619 | 56.91542 | 75.5223  | 61.5035  | 64.28889 | 79.82004 | 80.80071 | 0.404917 | 0.094333 | -0.11447  | 0.721373 | 0.091722 | 0.86391  |
| AT3G02930 | AT3G02930 | 234.2141 | 178.4246 | 137.779  | 84.13278 | 121.894  | 108.6565 | 117.3881 | 107.889  | 133.7457 | 212.0574 | 198.2198 | 184.3914 | -0.79237 | 0.000346 | -0.59475  | 0.011424 | 0.105767 | 0.835663 |
| AT3G02940 | MYB107    | 2.377808 | 0        | 0        | 0.824831 | 0.662467 | 0.996841 | 1.778607 | 0        | 0        | 0.959536 | 1.330334 | 0        | -0.01265 | NA       | -0.11428  | NA       | -0.05412 | NA       |
| AT3G02950 | THO7B     | 159.3131 | 214.1095 | 195.7235 | 214.8685 | 231.8635 | 196.3776 | 177.8607 | 152.1235 | 217.7029 | 196.7048 | 184.9164 | 184.3914 | 0.184764 | 0.375274 | -0.04365  | 0.869431 | 0.002055 | 0.996883 |
| AT3G02960 | AT3G02960 | 0        | 0        | 0        | 0        | 0        | 0.889303 | 0        | 0        | 0        | 0        | 0        | 0        | 0        | NA       | 0         | NA       | 0        | NA       |
| AT3G02970 | EXL6      | 0        | 0        | 0        | 0        | 0        | 0        | 1.07889  | 0        | 0        | 0        | 0        | 0        | 0.16673  | NA       | 0         | NA       | 0        | NA       |
| AT3G02980 | MCC1      | 23.77808 | 24.97944 | 20.60247 | 20.20836 | 23.18635 | 19.93682 | 28.45771 | 22.65669 | 17.57243 | 33.58375 | 29.26735 | 19.68222 | -0.11523 | 0.804139 | -0.00204  | 0.996893 | 0.235394 | 0.755937 |
| AT3G02990 | HSFA1E    | 32.10041 | 39.25341 | 23.17778 | 31.34358 | 48.36011 | 47.84836 | 69.36567 | 74.44341 | 68.33722 | 41.26003 | 58.53469 | 32.1131  | 0.389504 | 0.265237 | 1.107499  | 0.000373 | 0.44257  | 0.425471 |
| AT3G03000 | CML18     | 27.34479 | 48.17464 | 36.05432 | 75.47205 | 70.884   | 53.8294  | 49.80009 | 67.97007 | 96.64835 | 38.38143 | 27.93701 | 23.82585 | 0.820569 | 0.011576 | 0.897446  | 0.007056 | -0.25118 | 0.717074 |
| AT3G03010 | AT3G03010 | 71.33424 | 62.44861 | 63.09506 | 131.1482 | 121.894  | 125.6019 | 128.949  | 118.6779 | 111.292  | 72.92471 | 115.7391 | 108.7702 | 0.90646  | 2.71E-05 | 0.829533  | 0.000233 | 0.553293 | 0.092865 |
| AT3G03020 | AT3G03020 | 179.5245 | 153.4452 | 154.5185 | 22.2292  | 290.8231 | 234.2576 | 226.7724 | 175.8591 | 288.9688 | 174.6355 | 211.5231 | 164.7091 | 0.593552 | 0.005709 | 0.4686851 | 0.033438 | 0.162234 | 0.711842 |
| AT3G03030 | AT3G03030 | 48.74506 | 37.46917 | 32.19136 | 49.07745 | 56.97219 | 44.85784 | 84.48383 | 58.26006 | 52.71728 | 46.05771 | 58.53469 | 44.54398 | 0.322533 | 0.322633 | 0.678405  | 0.027738 | 0.29159  | 0.620936 |
| AT3G03040 | AT3G03040 | 246.1031 | 206.9725 | 252.3803 | 249.9238 | 325.9339 | 285.0965 | 222.3259 | 215.778  | 282.1351 | 243.722  | 270.0578 | 208.2172 | 0.272723 | 0.169945 | 0.023828  | 0.929552 | 0.023697 | 0.963009 |
| AT3G03050 | C5LD3     | 280.5813 | 174.8561 | 154.5185 | 138.5716 | 123.2189 | 175.444  | 150.2923 | 167.2279 | 103.4821 | 146.809  | 171.6131 | 145.0269 | -0.47155 | 0.07768  | -0.51809  | 0.061347 | -0.38722 | 0.362337 |
| AT3G03060 | AT3G03060 | 41.61164 | 30.33218 | 42.49259 | 58.56301 | 45.71024 | 67.78517 | 34.68284 | 33.44559 | 42.95482 | 44.13864 | 50.55269 | 63.1903  | 0.528767 | 0.078894 | -0.06201  | 0.888952 | 0.417305 | 0.405476 |
| AT3G03070 | AT3G03070 | 537.3846 | 601.2909 | 643.8272 | 753.0708 | 787.0111 | 670.8738 | 648.3022 | 564.2594 | 756.9506 | 684.1489 | 863.3867 | 614.2926 | 0.306869 | 0.088817 | 0.142036  | 0.510151 | 0.171203 | 0.329673 |
| AT3G03080 | AT3G03080 | 0        | 0        | 0        | 0        | 0        | 0        | 0        | 0        | 0.976246 | 0.959536 | 0        | 0        | 0        | NA       | 0         | NA       | 0.146371 | NA       |
| AT3G03090 | ATVG1     | 190.2246 | 183.7773 | 190.5728 | 119.1881 | 104.6698 | 152.5166 | 148.5137 | 151.0446 | 125.9357 | 189.9881 | 137.0244 | 161.6014 | -0.58483 | 0.002883 | -0.39885  | 0.063694 | -0.197   | 0.595333 |
| AT3G03100 | AT3G03100 | 389.9605 | 449.63   | 484.158  | 89.49669 | 560.4473 | 594.1171 | 544.4341 | 479.0271 | 751.7094 | 445.2245 | 343.2262 | 443.368  | 0.436246 | 0.040373 | 0.3392    | 0.140456 | -0.09776 | 0.836547 |
| AT3G03110 | XPO1B     | 174.7689 | 146.3082 | 220.1889 | 148.882  | 190.1281 | 230.2702 | 208.9863 | 220.0935 | 311.7932 | 168.8783 | 137.0244 | 165.745  | 0.055432 | 0.863961 | 0.04309   | 0.90156  | -0.19294 | 0.694796 |
| AT3G03120 | ATARF81C  | 43.98945 | 69.5856  | 63.09506 | 68.8734  | 72.20893 | 63.79781 | 51.5796  | 53.9445  | 60.52725 | 66.46235 | 23.94601 | 45.57989 | 0.229634 | 0.450146 | -0.06734  | 0.860557 | -0.65655 | 0.112    |
| AT3G03130 | AT3G03130 | 85.60108 | 58.88012 | 70.82099 | 80.83345 | 104.6698 | 82.73778 | 67.58706 | 73.36452 | 89.81463 | 93.07496 | 95.78405 | 80.80071 | 0.28781  | 0.264999 | 0.077444  | 0.816219 | 0.292493 | 0.490699 |
| AT3G03140 | AT3G03140 | 111.75   | 85.64381 | 84.98519 | 87.84452 | 75.52127 | 101.6778 | 82.70522 | 108.9679 | 60.52725 | 76.76285 | 57.20436 | 99.44703 | -0.09882 | 0.774213 | -0.1648   | 0.637742 | -0.25793 | 0.61817  |
| AT3G03150 | AT3G03150 | 680.0531 | 963.4429 | 834.4    | 707.7051 | 647.2305 | 544.2751 | 547.8109 | 644.0973 | 902.0513 | 1082.356 | 993.7595 | 887.7719 | -0.3687  | 0.08831  | -0.23422  | 0.3323   | 0.253675 | 0.481893 |
| AT3G03160 | AT3G03160 | 102.2457 | 96.34929 | 140.3543 | 199.6091 | 225.9013 | 153.5135 | 145.8458 | 133.7824 | 286.4041 | 145.8494 | 122.3907 | 126.3806 | 0.728915 | 0.011652 | 0.693121  | 0.021136 | 0.202954 | 0.732046 |
| AT3G03170 | AT3G03170 | 3.566712 | 7.136984 | 10.30123 | 17.32145 | 9.274542 | 13.95577 | 15.11816 | 15.10446 | 20.50117 | 10.55489 | 9.312338 | 9.323159 | 0.781954 | 0.123242 | 0.1042019 | 0.041704 | 0.365366 | NA       |
| AT3G03180 | AT3G03180 | 19.02246 | 32.11643 | 39.91728 | 60.62509 | 51.00988 | 43.86099 | 42.68657 | 43.1556  | 48.8123  | 40.3005  | 61.19536 | 34.18492 | 0.742248 | 0.022915 | 0.528984  | 0.147827 | 0.521667 | 0.329846 |
| AT3G03190 | G5TF11    | 131.9683 | 87.42806 | 113.3116 | 76.29688 | 63.59686 | 60.80729 | 78.25781 | 79.83786 | 88.83839 | 217.8146 | 222.1658 | 145.0269 | -0.70264 | 0.003091 | -0.42736  | 0.106464 | 0.772747 | 0.009615 |
| AT3G03200 | NAC045    | 3.566712 | 3.568492 | 3.862963 | 1.237247 | 1.324935 | 4.984204 | 1.778607 | 4.31556  | 2.928738 | 5.757214 | 1.330334 | 2.071813 | -0.40839 | 0.580675 | -0.17458  | 0.839311 | -0.11858 | NA       |
| AT3G03210 | AT3G03210 | 61.82301 | 58.88012 | 63.09506 | 47.01538 | 37.09817 | 45.85468 | 58.69403 | 56.10228 | 76.14719 | 58.53167 | 47.89202 | 63.1903  | -0.47975 | 0.017953 | 0.051638  | 0.886559 | -0.10452 | 0.861927 |
| AT3G03220 | EXPA13    | 116.5126 | 123.113  | 114.6012 | 89.49418 | 93.40789 | 88.71883 | 55.16942 | 53.36452 | 91.76712 | 114.1847 | 107.7571 | 122.237  | -0.36823 | 0.093465 | -0.06624  | 0.002624 | -0.03405 | 0.951963 |
| AT3G03230 | AT3G03230 | 0        | 1.784246 | 0        | 0.824831 | 2.649869 | 0.996841 | 0.889303 | 1.07889  | 0        | 0.959536 | 1.330334 | 0        | 0.480579 | 0.470264 | 0.054847  | 0.944643 | 0.103652 | NA       |
| AT3G03240 | AT3G03240 | 0        | 1.287654 | 2.88609  | 1.987402 | 2.990522 | 7.114428 | 1.07889  | 0.976246 | 0.919071 | 3.991002 | 2.071813 | 0.769801 | 0.260413 | 0.908121 | 0.193151  | 0.746668 | NA       | NA       |
| AT3G03250 | UGP       | 814.3992 | 708.3457 | 562.7049 | 476.34   | 472.3392 | 470.5088 | 508.6816 | 523.2616 | 445.1682 | 554.6116 | 448.3225 | 622.5798 | -0.5447  | 0.001356 | -0.48838  | 0.005681 | -0.35022 | 0.177996 |
| AT3G03260 | H0G8      | 1.188904 | 1.784246 | 1.287654 | 2.474493 | 0.662467 | 0        | 5.335821 | 5.39445  | 7.809968 | 1.919071 | 1.330334 | 1.413626 | -0.16875 | 0.836521 | 1.226367  | 0.005843 | 0.362722 | NA       |
| AT3G03270 | AT3G03270 | 63.01191 | 73.15409 | 87.5605  | 44.9533  | 47.69764 | 62.80097 | 51.5796  | 39.91893 | 78.09968 | 65.24842 | 58.53469 | 64.2262  | -0.51721 | 0.073456 | -0.37375  | 0.245226 | -0.23315 | 0.669318 |
| AT3G03272 | AT3G03272 | 0        | 0        | 0        | 0        | 0        | 0        | 0        | 0        | 0.976246 | 0.959536 | 0        | 0        | 0        | NA       | 0         | NA       | 0.146371 | NA       |
| AT3G03280 | AT3G03280 | 0        | 0        | 0        | 0        | 0        | 0        | 0        | 0        | 1.07889  | 0        | 0        | 0        | 0        | NA       | 0         | NA       | 0.16673  | NA       |
| AT3G03290 | AT3G03290 | 0        | 0        | 0        | 0        | 0        | 0        | 0        | 0        | 0        | 0        | 0        | 0        | #N/A     | #N/A     | #N/A      | #N/A     | #N/A     | #N/A     |
| AT3G03300 | DCL2      | 353.1045 | 272.9896 | 298.7358 | 238.3762 | 219.2767 | 283.1028 | 345.9391 | 264.328  | 201.1067 | 321.4444 | 336.5745 | 295.2334 | -0.31961 | 0.149304 | -0.18562  | 0.436262 | 0.037627 | 0.945273 |
| AT3G03305 | AT3G03305 | 178.3356 | 158.7979 | 151.9432 | 110.9398 | 88.10815 | 139.5577 | 175.1928 | 160.7546 | 80.05217 | 143.9033 | 126.3817 | 140.8833 | -0.5138  | 0.066098 | -0.22279  | 0.498997 | -0.23735 | 0.644822 |
| AT3G03310 | LCAT3     | 131.9683 | 105.2705 | 122.3272 | 176.9612 | 172.778  | 177.4377 | 209.8756 | 161.8335 | 188.4155 | 79.64146 | 99.77505 | 61.9192  | 0.578993 | 0.0085   | 0.613589  | 0.006674 | -0.16512 | 0.720577 |
| AT3G03320 | AT3G03320 | 41.61164 | 44.60615 | 52.79383 | 79.18379 | 83.47088 | 59.81045 | 58.69403 | 49.62894 | 81.02842 | 53.734   | 71.83803 | 63.3392  | 0.655199 | 0.018127 | 0.42094   | 0.182903 | 0.436412 | 0.342868 |
| AT3G03330 | AT3G03330 | 228.2696 | 283.6951 | 272.9827 | 133.0234 | 297.4478 | 304.0634 | 265.0124 | 320.4303 | 386.5934 | 293.6179 | 271.3881 | 295.2334 | 0.222033 | 0.235131 | 0.30626   | 0.10428  | 0.136202 | 0.691045 |
| AT3G03340 | UNE6      | 139.1018 | 201.6198 | 172.5457 | 260.2342 | 206.6898 | 201.3618 | 245.4478 | 243.8291 | 234.299  | 138.1731 |          |          |          |          |           |          |          |          |

|           |           |          |          |          |          |          |          |          |           |          |          |          |          |          |          |          |          |          |          |
|-----------|-----------|----------|----------|----------|----------|----------|----------|----------|-----------|----------|----------|----------|----------|----------|----------|----------|----------|----------|----------|
| AT3G03820 | AT3G03820 | 79.65656 | 96.34929 | 100.437  | 40.82914 | 30.47349 | 21.9305  | 21.34328 | 23.73558  | 37.09735 | 105.5489 | 114.4087 | 123.2729 | -1.43723 | 2.35E-08 | -1.64476 | 1.74E-09 | 0.307263 | 0.502394 |
| AT3G03826 | AT3G03826 | 0        | 0        | 0        | 0        | 0        | 0        | 0        | 0         | 0        | 0        | 0        | 0        | #N/A     | #N/A     | #N/A     | #N/A     | #N/A     | #N/A     |
| AT3G03828 | AT3G03828 | 0        | 0        | 0        | 0        | 0        | 0        | 0        | 0         | 0        | 0.959536 | 0        | 0        | 0        | NA       | 0        | NA       | 0.175112 | NA       |
| AT3G03830 | AT3G03830 | 21.40027 | 28.54794 | 19.31482 | 14.02213 | 12.58688 | 3.987363 | 3.557214 | 3.23667   | 10.73871 | 15.35257 | 23.94601 | 26.93357 | -0.92179 | 0.049225 | -1.57343 | 0.001195 | -0.04072 | NA       |
| AT3G03840 | AT3G03840 | 20.21137 | 23.1952  | 46.35556 | 27.63184 | 31.13596 | 9.968408 | 8.003731 | 8.63112   | 14.64369 | 33.58375 | 53.21336 | 50.75942 | -0.3084  | 0.531072 | -1.27858 | 0.004749 | 0.539826 | 0.450905 |
| AT3G03845 | AT3G03845 | 0        | 0        | 0        | 0        | 0        | 0        | 0        | 0         | 0        | 0        | 0        | 0        | 0        | 0        | 0        | 0        | 0.172362 | NA       |
| AT3G03847 | AT3G03847 | 0        | 0        | 0        | 0        | 0        | 0        | 0        | 0         | 0        | 0        | 0        | 0        | 0        | 0        | 0        | 0        | 0.172362 | NA       |
| AT3G03850 | AT3G03850 | 34.47821 | 24.97944 | 41.20494 | 33.40566 | 35.11077 | 21.9305  | 14.22886 | 7.55223   | 20.50117 | 25.90746 | 41.24035 | 44.54398 | -0.13204 | 0.77364  | -1.1113  | 0.005008 | 0.116123 | 0.892359 |
| AT3G03852 | AT3G03852 | 0        | 0        | 0        | 0        | 0        | 0        | 0        | 0         | 0        | 0        | 0        | 0        | #N/A     | #N/A     | #N/A     | #N/A     | #N/A     | #N/A     |
| AT3G03855 | AT3G03855 | 121.2682 | 87.42806 | 96.57408 | 152.1813 | 139.1181 | 159.4945 | 76.4801  | 79.83786  | 57.59851 | 56.6126  | 58.53469 | 77.69299 | 0.535437 | 0.014166 | -0.50786 | 0.038062 | -0.6446  | 0.039529 |
| AT3G03860 | APRL5     | 340.0265 | 308.6746 | 318.0506 | 240.4383 | 288.8357 | 235.2544 | 271.2376 | 248.1447  | 295.8025 | 284.0225 | 321.9408 | 303.5206 | -0.33512 | 0.029781 | -0.24383 | 0.152331 | -0.09203 | 0.774608 |
| AT3G03870 | AT3G03870 | 663.4084 | 835.0271 | 721.0864 | 699.0444 | 775.7492 | 764.5769 | 980.0124 | 760.6174  | 813.2129 | 595.8716 | 729.023  | 642.262  | 0.01485  | 0.944242 | 0.203926 | 0.238839 | -0.17021 | 0.538161 |
| AT3G03880 | AT3G03880 | 104.6235 | 99.91778 | 78.54691 | 156.3055 | 180.8536 | 149.5261 | 160.9639 | 121.9146  | 175.7243 | 87.31774 | 134.3637 | 110.842  | 0.758607 | 0.000645 | 0.675726 | 0.003746 | 0.213764 | 0.630253 |
| AT3G03890 | AT3G03890 | 450.5946 | 540.6265 | 503.4728 | 586.4549 | 656.5051 | 678.8486 | 899.9751 | 773.5641  | 675.5622 | 582.4381 | 505.5269 | 533.4919 | 0.357998 | 0.020007 | 0.646746 | 1.06E-05 | 0.120481 | 0.689662 |
| AT3G03900 | APK3      | 49.9337  | 59.95889 | 55.36914 | 56.91335 | 55.64725 | 57.81677 | 63.14055 | 46.39227  | 43.93107 | 75.80331 | 51.88302 | 62.15439 | 0.124234 | 0.700126 | -0.01242 | 0.974261 | 0.286755 | 0.554396 |
| AT3G03910 | GSH3      | 11.88904 | 5.352738 | 6.438272 | 9.485558 | 9.937009 | 6.977885 | 9.782338 | 7.55223   | 18.54867 | 10.55489 | 9.312338 | 21.75404 | 0.089272 | 0.896351 | 0.438731 | 0.479437 | 0.622891 | NA       |
| AT3G03920 | AT3G03920 | 334.082  | 353.2807 | 392.7346 | 470.1538 | 514.7371 | 448.5784 | 274.7948 | 318.2725  | 492.028  | 310.8895 | 288.6825 | 323.2028 | 0.398307 | 0.059941 | 0.005866 | 0.984334 | -0.21972 | 0.561708 |
| AT3G03930 | AT3G03930 | 3.566712 | 0        | 2.575309 | 3.71174  | 1.324935 | 0.996841 | 0.889303 | 0         | 2.928738 | 0.959536 | 0        | 2.071813 | 0.020615 | 0.980861 | 0.1546   | 0.704493 | -0.3921  | NA       |
| AT3G03940 | AT3G03940 | 750.1984 | 688.719  | 633.5259 | 516.3443 | 426.6289 | 532.313  | 615.398  | 666.754   | 474.4556 | 588.4497 | 439.0102 | 565.605  | -0.48175 | 0.005885 | -0.23455 | 0.240066 | -0.39661 | 0.118262 |
| AT3G03950 | ECT1      | 256.8033 | 321.1643 | 272.9827 | 427.2625 | 420.6667 | 424.6542 | 443.7624 | 456.3704  | 353.4041 | 289.7798 | 286.0218 | 270.3716 | 0.580252 | 7.86E-05 | 0.58044  | 0.000226 | -0.00047 | 0.998659 |
| AT3G03960 | CCT8      | 880.9778 | 774.3628 | 806.0716 | 705.3046 | 637.2935 | 670.8738 | 573.6007 | 686.174   | 625.7737 | 677.7787 | 558.7403 | 738.6014 | -0.28619 | 0.072603 | -0.38101 | 0.017098 | -0.2338  | 0.351413 |
| AT3G03970 | AT3G03970 | 71.33424 | 82.07532 | 75.97161 | 87.84452 | 65.58426 | 88.71883 | 73.81219 | 74.44341  | 48.8123  | 92.11542 | 62.5257  | 75.62118 | 0.080469 | 0.804485 | -0.20409 | 0.523743 | 0.021455 | 0.976969 |
| AT3G03980 | AT3G03980 | 49.93397 | 51.74313 | 57.94445 | 77.12171 | 85.45828 | 72.76938 | 66.69776 | 81.99564  | 81.02842 | 52.77446 | 53.21336 | 61.11849 | 0.542145 | 0.024034 | 0.499397 | 0.053903 | 0.062279 | 0.920569 |
| AT3G03990 | D14       | 23.77601 | 440.7088 | 373.4198 | 639.6566 | 628.6814 | 682.8359 | 729.2289 | 699.1207  | 758.5431 | 329.1207 | 311.2981 | 296.2693 | 0.739948 | 8.76E-10 | 0.89899  | 4.6E-14  | -0.31083 | 0.10692  |
| AT3G04000 | AT3G04000 | 23.77808 | 33.90067 | 36.05432 | 40.82914 | 47.69764 | 46.85152 | 68.47637 | 74.44341  | 64.43224 | 37.42189 | 67.84703 | 38.32854 | 0.43941  | 0.127771 | 1.1546   | 9.42E-05 | 0.556081 | 0.254453 |
| AT3G04010 | AT3G04010 | 10.70014 | 17.84246 | 24.46543 | 32.16841 | 41.07297 | 32.89575 | 35.57214 | 34.52448  | 26.35864 | 18.23118 | 23.94601 | 21.75404 | 0.918297 | 0.010724 | 0.786784 | 0.034366 | 0.231671 | 0.727938 |
| AT3G04020 | AT3G04020 | 49.93397 | 66.0171  | 63.09566 | 66.39891 | 62.93439 | 72.76938 | 80.92662 | 57.18117  | 54.66978 | 54.69353 | 59.86503 | 52.83123 | 0.173601 | 0.558061 | 0.120255 | 0.723433 | -0.05859 | 0.889374 |
| AT3G04030 | AT3G04030 | 74.90095 | 67.80135 | 96.57408 | 44.9533  | 54.32232 | 61.80413 | 64.02985 | 55.02339  | 42.95482 | 73.88424 | 77.15937 | 76.65708 | -0.57909 | 0.021719 | -0.54397 | 0.045356 | -0.07782 | 0.895203 |
| AT3G04040 | AT3G04040 | 15.45575 | 17.84246 | 25.75309 | 19.79595 | 15.89921 | 17.94313 | 17.78607 | 0.9710009 | 15.61994 | 26.867   | 15.96401 | 29.00538 | -0.11876 | 0.814989 | -0.3892  | 0.430038 | 0.270934 | 0.738247 |
| AT3G04050 | AT3G04050 | 3.566712 | 1.136984 | 0        | 1.237247 | 2.649869 | 1.993628 | 0.889303 | 4.31556   | 4.88123  | 2.878607 | 7.982004 | 9.323159 | -0.47148 | 0.517189 | -0.01357 | 0.98774  | 0.643664 | NA       |
| AT3G04060 | anac046   | 15.45575 | 14.27397 | 10.30123 | 68.46099 | 52.99738 | 49.84204 | 72.92289 | 74.44341  | 64.43224 | 5.757214 | 15.96401 | 9.323159 | 1.926904 | 7.36E-09 | 2.198167 | 4E-11    | -0.36358 | 0.646732 |
| AT3G04070 | anac047   | 27.34479 | 28.54794 | 12.87654 | 223.1168 | 244.4504 | 270.1439 | 220.5473 | 178.0168  | 138.6269 | 17.27164 | 33.25835 | 19.68222 | 3.226341 | 5.18E-32 | 2.785531 | 1.34E-23 | -0.00761 | 0.993182 |
| AT3G04080 | APY1      | 165.2576 | 101.702  | 176.4088 | 137.7468 | 116.5942 | 149.5261 | 125.3918 | 147.8079  | 105.4346 | 119.942  | 90.46271 | 128.4524 | -0.14641 | 0.604456 | -0.23498 | 0.410709 | -0.37989 | 0.329307 |
| AT3G04090 | SIP1-1    | 532.629  | 578.0957 | 499.6099 | 646.2552 | 665.1171 | 579.1645 | 499.8886 | 562.1017  | 616.0112 | 483.606  | 469.6079 | 407.1113 | 0.023816 | 0.114559 | 0.006564 | 0.709399 | -0.23785 | 0.299464 |
| AT3G04100 | AGL57     | 0        | 0        | 0        | 0        | 0        | 0        | 0.889303 | 0         | 0        | 0        | 0        | 0        | 0        | NA       | 0        | NA       | 0        | NA       |
| AT3G04110 | GLR1-1    | 158.1242 | 194.4828 | 167.3951 | 196.3098 | 198.7402 | 200.365  | 191.2002 | 162.9124  | 95.67211 | 110.3466 | 117.0694 | 122.237  | 0.195151 | 0.455472 | -0.19481 | 0.488197 | -0.54658 | 0.100977 |
| AT3G04120 | GAPC1     | 2803.436 | 2389.105 | 2183.862 | 2689.362 | 2490.877 | 2428.304 | 1718.134 | 1917.187  | 2563.622 | 2118.655 | 1841.182 | 2237.558 | 0.043918 | 0.844353 | -0.24655 | 0.205116 | -0.24634 | 0.387801 |
| AT3G04130 | AT3G04130 | 60.6341  | 62.44861 | 70.82099 | 47.42779 | 54.98478 | 59.81045 | 50.6903  | 55.02339  | 40.02609 | 44.13864 | 50.55269 | 69.40574 | -0.26163 | 0.374122 | -0.39505 | 0.194207 | -0.22929 | 0.657308 |
| AT3G04140 | AT3G04140 | 172.3911 | 162.3664 | 185.4222 | 34.64291 | 47.03518 | 30.90206 | 44.46517 | 28.05114  | 36.2111  | 115.1443 | 95.78405 | 139.8474 | -1.2101  | 6.95E-29 | -2.15659 | 2.19E-20 | -0.54695 | 0.087743 |
| AT3G04150 | AT3G04150 | 0        | 0        | 0        | 0        | 0        | 0        | 0        | 0         | 0        | 0        | 0        | 0        | #N/A     | #N/A     | #N/A     | #N/A     | #N/A     | #N/A     |
| AT3G04160 | SNRNP48   | 158.1242 | 149.8767 | 158.3815 | 114.2391 | 117.2567 | 121.6146 | 141.3993 | 135.9401  | 72.2422  | 186.1499 | 174.2738 | 151.2424 | -0.39162 | 0.106706 | -0.40228 | 0.117448 | 0.128067 | 0.7943   |
| AT3G04170 | AT3G04170 | 0        | 0        | 0        | 0        | 0        | 0        | 0.889303 | 0         | 0        | 0        | 0        | 0        | 0        | NA       | 0        | NA       | 0        | NA       |
| AT3G04180 | AT3G04180 | 0        | 0        | 0        | 0        | 0        | 0        | 0.889303 | 0         | 0        | 0        | 0        | 0        | 0        | NA       | 0        | NA       | 0        | NA       |
| AT3G04181 | AT3G04181 | 0        | 0        | 7.725926 | 5.773818 | 7.949607 | 2.990522 | 0.889303 | 0         | 1.952492 | 4.797678 | 0        | 2.071813 | 0.622426 | 0.381167 | -0.5377  | 0.47823  | -0.07186 | NA       |
| AT3G04184 | AT3G04184 | 8.322328 | 8.92123  | 9.01358  | 11.13522 | 11.92441 | 6.977885 | 3.557214 | 6.47334   | 11.71495 | 7.676285 | 6.65167  | 9.323159 | 0.195982 | 0.757517 | -0.2187  | 0.753391 | -0.10759 | NA       |
| AT3G04190 | AT3G04190 | 0        | 0        | 0        | 0        | 0        | 0        | 0.889303 | 0         | 0        | 0        | 0        | 0        | 0        | NA       | 0        | NA       | 0        | NA       |
| AT3G04200 | AT3G04200 | 2.377808 | 1.136984 | 1.287654 | 6.598649 | 7.28714  | 1.993628 | 3.557214 | 8.63112   | 5.857476 | 0        | 2.660668 | 1.035907 | 0.482453 | 0.496321 | 0.541708 | 0.464057 | -0.69934 | NA       |
| AT3G04210 | AT3G04210 | 1543.197 | 1811.01  | 1568.363 | 2636.573 | 2419.33  | 2869.905 | 2537.183 | 2521.366  | 2285.392 | 888.53   | 965.8225 | 1104.276 | 0.680739 | 4.4E-08  | 0.572395 | 6.8E-06  | -0.72428 | 3.4E-07  |
| AT3G04220 | AT3G04220 | 7.133424 | 21.41095 | 14.1642  | 79.59621 | 67.5166  | 100.6809 | 112.0522 | 113.2834  | 95.67211 | 2.878607 | 5.321336 | 7.251346 | 2.386815 | 1.15E-13 | 2.75355  | 8.06E-18 | -1.054   | 0.091351 |
| AT3G04230 | RP516B    | 27.34479 | 21.41095 | 36.05432 | 58.1506  | 55.64725 | 37.87995 | 27.56841 | 50.70783  | 80.05217 | 32.62421 | 42.57069 | 35.22082 | 0.753639 | 0.047635 | 0.791261 | 0.054725 | 0.314169 | 0.670667 |
| AT3G04240 | SEC       | 838.1773 | 726.1881 | 719.7988 | 703.1686 | 659.1549 | 823.3905 | 861.7351 | 975.3165  | 528.1491 | 661.12   | 667.8277 | 684.7342 | -0.06398 | 0.80929  | -0.04779 | 0.868241 | -0.1776  | 0.652037 |
| AT3G04250 | AT3G04250 | 0        | 0        | 0        | 0        | 0        | 0        | 0        | 0.972646  | 0        | 0        | 0        | 0        | 0        | NA       | 0        | NA       | 0        | NA       |
| AT3G04260 | PTAC3     | 1292.339 | 1108.017 | 1178.204 | 904.4274 | 926.7917 | 936.0335 | 1020.031 | 1111.257  | 898.1463 | 1197.5   | 1568.464 | 1192.328 | -0.36748 | 0.013876 | -0.238   |          |          |          |

|           |           |          |          |          |          |          |          |          |          |          |          |          |          |          |          |          |          |          |          |          |
|-----------|-----------|----------|----------|----------|----------|----------|----------|----------|----------|----------|----------|----------|----------|----------|----------|----------|----------|----------|----------|----------|
| AT3G04720 | HEL       | 350.7267 | 444.2773 | 427.5012 | 1516.864 | 1315.66  | 1197.206 | 2386.891 | 2375.716 | 2969.74  | 234.1267 | 399.1002 | 284.8743 | 1.679272 | 5.61E-20 | 2.596104 | 4.58E-47 | -0.405   | 0.191523 |          |
| AT3G04721 | AT3G04721 | 0        | 0        | 0        | 0        | 0        | 0        | 0        | 0        | 0        | 0        | 0        | 0        | #N/A     | #N/A     | #N/A     | #N/A     | #N/A     | #N/A     |          |
| AT3G04730 | IAA16     | 2062.748 | 2212.465 | 2328.079 | 1579.552 | 1691.941 | 1661.734 | 1530.449 | 1351.849 | 1534.659 | 2257.787 | 2067.339 | 1905.032 | -0.4174  | 0.000174 | -0.57443 | 1.6E-07  | -0.08268 | 0.719136 |          |
| AT3G04732 | AT3G04732 | 0        | 0        | 0        | 0        | 0        | 0        | 0        | 0        | 0        | 0        | 0        | 0        | #N/A     | #N/A     | #N/A     | #N/A     | #N/A     | #N/A     |          |
| AT3G04735 | RALF11    | 0        | 0        | 0        | 0        | 0        | 0        | 0        | 0        | 0        | 0        | 0        | 0        | #N/A     | #N/A     | #N/A     | #N/A     | #N/A     | #N/A     |          |
| AT3G04740 | MED14     | 492.2062 | 380.0444 | 285.8593 | 169.9152 | 156.3423 | 239.2418 | 196.5361 | 274.038  | 158.1519 | 281.1439 | 284.6915 | 275.5511 | -1.0006  | 2.88E-05 | -0.84844 | 0.000609 | -0.44369 | 0.251311 |          |
| AT3G04750 | PCMP-E81  | 99.86793 | 112.4075 | 114.6012 | 69.28582 | 52.99738 | 80.7441  | 76.4801  | 80.91675 | 50.76479 | 79.64146 | 82.48071 | 95.3034  | -0.66839 | 0.005201 | -0.62364 | 0.014073 | -0.3275  | 0.43165  |          |
| AT3G04760 | AT3G04760 | 95.06777 | 947.4336 | 90.21852 | 27.63184 | 90.69989 | 699.8692 | 671.0793 | 784.5137 | 950.6654 | 873.7402 | 828.0792 | 959.1708 | 930.2441 | -0.38717 | 0.001778 | 0.023423 | 0.894925 | -0.05481 | 0.849275 |
| AT3G04765 | MIR167C   | 0        | 0        | 0        | 0        | 0        | 0        | 0        | 0        | 0        | 0        | 0        | 0        | #N/A     | #N/A     | #N/A     | #N/A     | #N/A     | #N/A     |          |
| AT3G04770 | RPSAB     | 74.90095 | 58.88012 | 64.38272 | 90.31901 | 74.19633 | 71.72254 | 64.7334  | 64.3347  | 69.31347 | 66.20796 | 74.4987  | 80.80071 | 0.24889  | 0.334198 | 0.062926 | 0.850318 | 0.140514 | 0.781547 |          |
| AT3G04780 | AT3G04780 | 249.6698 | 217.678  | 309.037  | 398.3934 | 459.7523 | 389.7647 | 422.4192 | 353.8759 | 557.4365 | 260.0342 | 243.4511 | 282.8025 | 0.66228  | 0.000687 | 0.75601  | 0.000113 | 0.013654 | 0.982469 |          |
| AT3G04790 | RP3       | 1067.636 | 1029.51  | 967.0284 | 632.6455 | 625.3691 | 552.2498 | 860.8458 | 1028.182 | 1607.877 | 1170.633 | 1392.86  | 956.1417 | -0.73401 | 0.000689 | 0.184511 | 0.491513 | 0.192919 | 0.64448  |          |
| AT3G04800 | TIM23-3   | 0        | 0        | 0        | 0        | 0        | 0        | 0        | 0        | 0        | 0        | 0        | 0        | #N/A     | #N/A     | #N/A     | #N/A     | #N/A     | #N/A     |          |
| AT3G04810 | NEK2      | 387.5827 | 301.5376 | 391.4469 | 300.651  | 311.3596 | 304.0364 | 307.699  | 322.5881 | 229.4178 | 408.7622 | 413.7339 | 394.6804 | -0.24116 | 0.174147 | -0.33125 | 0.065592 | 0.161827 | 0.597604 |          |
| AT3G04820 | AT3G04820 | 115.3237 | 133.8185 | 146.7926 | 146.4075 | 139.7806 | 135.5703 | 128.949  | 155.3602 | 91.76712 | 105.5489 | 93.12338 | 99.44703 | 0.094904 | 0.721661 | -0.07234 | 0.808627 | -0.39006 | 0.626901 |          |
| AT3G04830 | AT3G04830 | 373.3158 | 403.2396 | 422.3506 | 530.3664 | 489.5633 | 546.2687 | 457.9913 | 481.1849 | 429.5482 | 437.5482 | 484.2416 | 421.614  | 0.381633 | 0.002777 | 0.189549 | 0.199931 | 0.160687 | 0.489448 |          |
| AT3G04840 | RPS3AA    | 2853.369 | 2829.814 | 3007.961 | 3169.826 | 3015.551 | 2768.227 | 1806.175 | 2223.592 | 3013.671 | 2889.162 | 2562.223 | 2674.711 | 0.04239  | 0.852259 | -0.2976  | 0.118685 | -0.09497 | 0.796731 |          |
| AT3G04850 | TCX4      | 52.31177 | 37.46917 | 50.21852 | 27.63184 | 29.81103 | 34.88943 | 27.56841 | 23.73558 | 23.4299  | 53.734   | 66.5167  | 52.83123 | -0.6079  | 0.036694 | -0.86159 | 0.005159 | 0.026787 | 0.607892 |          |
| AT3G04854 | AT3G04854 | 4.755616 | 0        | 5.150617 | 2.062078 | 0.662467 | 1.993682 | 2.66791  | 0        | 2.928738 | 0.959536 | 0        | 2.071813 | -0.55924 | 0.439875 | -0.4285  | 0.584396 | -0.74492 | NA       |          |
| AT3G04855 | AT3G04855 | 0        | 0        | 0        | 0        | 0        | 0        | 0.889303 | 0        | 0        | 0        | 0        | 0        | #N/A     | #N/A     | 0.160764 | NA       | 0        | NA       |          |
| AT3G04860 | AT3G04860 | 79.65566 | 60.66437 | 96.57408 | 45.36571 | 45.04777 | 60.80729 | 53.35821 | 67.97007 | 67.36097 | 65.24842 | 97.11438 | 82.87252 | -0.65393 | 0.012458 | -0.33112 | 0.27293  | 0.024467 | 0.973085 |          |
| AT3G04870 | ZDS1      | 738.3094 | 758.3046 | 672.1556 | 668.3381 | 599.5329 | 613.0571 | 795.0373 | 863.112  | 696.0634 | 785.8597 | 1084.222 | 755.1759 | -0.19943 | 0.275998 | 0.116788 | 0.573107 | 0.268928 | 0.310967 |          |
| AT3G04880 | DRT102    | 256.8033 | 292.6163 | 244.6543 | 245.7997 | 264.3244 | 266.1565 | 218.7687 | 225.488  | 294.8263 | 242.7625 | 199.5501 | 216.5045 | -0.02924 | 0.898054 | -0.09636 | 0.66359  | -0.25464 | 0.377356 |          |
| AT3G04890 | AT3G04890 | 259.1811 | 324.7328 | 319.3383 | 262.7087 | 314.0095 | 275.1281 | 276.5734 | 301.0103 | 310.4462 | 379.9761 | 331.2532 | 316.9874 | -0.07941 | 0.68418  | -0.01976 | 0.931549 | 0.191005 | 0.499012 |          |
| AT3G04900 | AT3G04900 | 0        | 0        | 0        | 0.412416 | 0        | 0        | 0        | 0        | 0.959536 | 0        | 0        | 0        | 0.066171 | NA       | 0        | NA       | 0.145274 | NA       |          |
| AT3G04903 | AT3G04903 | 0        | 0        | 0        | 0.412416 | 0        | 0        | 0        | 0        | 0        | 0        | 0        | 0        | 0.095918 | NA       | 0        | NA       | 0        | NA       |          |
| AT3G04910 | WNK1      | 2137.649 | 2148.232 | 2075.699 | 1166.311 | 1159.98  | 1485.293 | 1662.108 | 1834.113 | 1468.274 | 2260.666 | 2430.52  | 2162.973 | -0.73228 | 2.51E-08 | -0.35344 | 0.013986 | 0.106067 | 0.698495 |          |
| AT3G04920 | RPS2AA    | 1062.88  | 1068.763 | 1270.915 | 1586.15  | 1627.682 | 1354.707 | 1171.213 | 1058.391 | 1697.692 | 833.8365 | 689.113  | 1523.819 | 0.405838 | 0.14877  | 0.197241 | 0.544784 | -0.15132 | 0.785334 |          |
| AT3G04930 | AT3G04930 | 426.8165 | 383.6129 | 361.8309 | 402.5176 | 342.4956 | 423.6573 | 428.6443 | 406.7415 | 416.857  | 358.8663 | 391.1182 | 355.3159 | -0.00838 | 0.96543  | 0.092741 | 0.603788 | -0.08778 | 0.760953 |          |
| AT3G04940 | CYS01     | 451.7835 | 369.3389 | 440.3778 | 355.9194 | 353.0951 | 371.8216 | 314.8134 | 347.4026 | 415.8808 | 362.7045 | 336.5745 | 410.219  | -0.22578 | 0.17835  | -0.22871 | 0.197959 | -0.18507 | 0.510598 |          |
| AT3G04943 | LCR41     | 0        | 0        | 0        | 0        | 0        | 0        | 0        | 0        | 0        | 0        | 0        | 0        | #N/A     | #N/A     | #N/A     | #N/A     | #N/A     | #N/A     |          |
| AT3G04945 | LCR18     | 0        | 0        | 0        | 0        | 0        | 0        | 0        | 0        | 0        | 0        | 0        | 0        | #N/A     | #N/A     | #N/A     | #N/A     | #N/A     | #N/A     |          |
| AT3G04950 | AT3G04950 | 39.23383 | 30.33218 | 30.9037  | 42.89122 | 49.68505 | 36.88311 | 37.35075 | 23.73558 | 40.02609 | 39.34096 | 30.59768 | 41.43626 | 0.341701 | 0.315816 | 0.004313 | 0.992518 | 0.136888 | 0.850597 |          |
| AT3G04960 | AT3G04960 | 52.31177 | 39.25341 | 43.78027 | 11.96005 | 21.86142 | 7.974726 | 14.22886 | 20.49891 | 18.54867 | 98.83217 | 111.7481 | 75.62118 | -1.35857 | 2.54E-06 | -1.24334 | 0.000328 | 0.171050 | 0.008653 |          |
| AT3G04970 | PAT17     | 82.03437 | 119.5445 | 86.27284 | 158.78   | 180.8536 | 153.5135 | 146.7351 | 124.0723 | 149.3656 | 105.5489 | 117.0694 | 97.37521 | 0.779594 | 6.15E-05 | 0.55354  | 0.009024 | 0.163369 | 0.697022 |          |
| AT3G04980 | AT3G04980 | 77.28776 | 41.03766 | 55.36914 | 29.28151 | 26.49869 | 27.91154 | 33.79353 | 30.20892 | 26.35864 | 60.45074 | 55.87403 | 54.90305 | -1.01625 | 0.00027  | -0.90956 | 0.002309 | -0.04084 | 0.957164 |          |
| AT3G04990 | AT3G04990 | 0        | 0        | 0        | 0        | 0        | 0        | 0.889303 | 0        | 0        | 0        | 0        | 0        | 0.128567 | 0        | 0        | NA       | 0        | NA       |          |
| AT3G04997 | AT3G04997 | 0        | 0        | 0        | 0.662467 | 0        | 0        | 0        | 0        | 0        | 0        | 0        | 0        | 0.286892 | 0.18355  | 0.253101 | 0.27705  | -0.01782 | 0.975875 |          |
| AT3G05000 | AT3G05000 | 162.8798 | 199.8356 | 218.9012 | 240.8507 | 239.1507 | 231.2671 | 187.643  | 217.9358 | 289.9451 | 190.9476 | 166.2917 | 214.4327 | 0.587642 | 0.000148 | 0.476663 | 0.003877 | 0.034666 | 0.935197 |          |
| AT3G05010 | AT3G05010 | 149.8019 | 185.5616 | 198.2988 | 252.8107 | 270.9491 | 283.1028 | 257.0087 | 239.5136 | 246.9902 | 190.9476 | 170.2827 | 182.3195 | -0.17609 | 0.466892 | -0.3737  | 0.110437 | 0.489216 | 0.905689 |          |
| AT3G05020 | ACP1      | 161.6909 | 153.4452 | 157.0938 | 122.8998 | 162.3045 | 132.5798 | 112.0522 | 98.17898 | 151.3181 | 215.8955 | 256.7545 | 198.8941 | -1.71188 | 6.89E-22 | -1.18242 | 7.9E-11  | 0.019892 | 0.97028  |          |
| AT3G05030 | NHX2      | 474.3727 | 356.8492 | 369.5568 | 108.0529 | 121.2315 | 129.5893 | 192.0896 | 193.1213 | 134.7219 | 458.658  | 380.4755 | 380.1777 | -0.26371 | 0.369965 | -0.12305 | 0.722604 | -0.08906 | 0.883508 |          |
| AT3G05040 | HST1      | 179.5245 | 139.1712 | 141.642  | 113.4144 | 109.3071 | 161.4882 | 170.6444 | 184.4902 | 90.79088 | 135.2945 | 164.9614 | 133.6191 | 0.118418 | 0.591034 | 0.091367 | 0.780898 | -0.21584 | 0.524771 |          |
| AT3G05050 | AT3G05050 | 260.37   | 256.9314 | 217.6136 | 270.5446 | 221.2641 | 309.0206 | 270.3284 | 296.6947 | 216.7262 | 201.5025 | 208.8624 | 219.6122 | -0.27756 | 0.021765 | -0.04792 | 0.831868 | -0.07555 | 0.845503 |          |
| AT3G05060 | NOPS-2    | 662.2195 | 549.5478 | 609.0605 | 468.5041 | 537.261  | 494.433  | 514.9067 | 525.4194 | 720.4695 | 526.7851 | 554.7493 | 647.4416 | -0.27756 | 0.021765 | -0.04792 | 0.831868 | -0.07555 | 0.845503 |          |
| AT3G05070 | AT3G05070 | 219.9472 | 312.2431 | 229.2025 | 375.2982 | 384.8935 | 336.9322 | 332.5995 | 317.1936 | 412.9521 | 292.6584 | 421.7159 | 303.5206 | 0.523806 | 0.109132 | 0.477262 | 0.002378 | 0.141416 | 0.173985 |          |
| AT3G05080 | AT3G05080 | 0        | 0        | 0        | 0        | 0        | 0        | 0        | 0        | 0        | 0        | 0        | 0        | #N/A     | #N/A     | #N/A     | #N/A     | #N/A     | #N/A     |          |
| AT3G05090 | LRS1      | 392.3382 | 421.0821 | 333.5025 | 419.8391 | 375.6189 | 477.4867 | 461.5485 | 476.8694 | 328.9949 | 410.6812 | 446.9922 | 368.7827 | 0.147244 | 0.492421 | 0.143351 | 0.528166 | 0.095701 | 0.810892 |          |
| AT3G05100 | AT3G05100 | 257.9922 | 249.7944 | 271.6951 | 235.4893 | 246.4378 | 255.1912 | 247.2264 | 245.9869 | 211.8454 | 242.7625 | 254.0938 | 233.079  | -0.08613 | 0.617807 | -0.14512 | 0.40834  | -0.09777 | 0.746536 |          |
| AT3G05110 | AT3G05110 | 2.377808 | 3.568492 | 2.975309 | 4.124156 | 3.974804 | 2.990522 | 4.446517 | 2.15778  | 0.972646 | 4.797678 | 5.321336 | 9.323159 | 0.25047  | 0.742089 | -0.08708 | 0.920473 | 0.806967 | 0.917881 |          |
| AT3G05120 | GID1A     | 191.4135 | 199.8356 | 200.8741 | 282.0923 | 309.3722 | 291.0775 | 369.6009 | 342.0081 | 375.5841 | 171.7569 | 208.8624 | 197.8581 | 0.865503 | 7.03E-05 | -0.12305 | 0.722604 | -0.08906 | 0.883508 |          |
| AT3G05130 | AT3G05130 | 152.1797 | 146.3082 | 127.4778 | 109.2901 | 112.6194 | 118.6241 | 82.70522 | 74.44341 | 106.4108 | 94.03449 | 111.7481 | 110.842  | -0.31813 | 0.123758 | -0.67077 | 0.00103  | -0.02015 | 0.165196 |          |
| AT3G05140 | RBK2      | 22.58917 | 10.70548 | 33.47901 | 13.1973  | 17.22415 | 13.95577 | 12.40257 | 10.73871 | 15.35257 | 29.26735 | 23.82585 | 0        | -0.55624 | 0.21072  | -0.76566 | 0.100191 | -0.46134 | 0.989317 |          |
| AT3G05150 | AT3G05150 | 3.566712 | 1.784246 | 5.150617 | 2.474    |          |          |          |          |          |          |          |          |          |          |          |          |          |          |          |

|           |           |          |          |          |          |          |          |          |          |          |          |           |          |          |          |          |          |          |          |
|-----------|-----------|----------|----------|----------|----------|----------|----------|----------|----------|----------|----------|-----------|----------|----------|----------|----------|----------|----------|----------|
| AT3G05570 | AT3G05570 | 39.23383 | 58.88012 | 47.64321 | 112.177  | 104.0074 | 89.71567 | 96.04478 | 74.44341 | 134.7219 | 44.13864 | 51.88302  | 69.40574 | 1.03562  | 0.00017  | 1.025957 | 0.000291 | 0.184702 | 0.767369 |
| AT3G05580 | TOPP8     | 82.03437 | 115.976  | 95.28642 | 118.7757 | 145.0803 | 162.485  | 128.949  | 120.8357 | 140.5794 | 94.03449 | 62.5257   | 83.90843 | 0.525781 | 0.019414 | 0.414228 | 0.091809 | -0.24894 | 0.562735 |
| AT3G05590 | RPL18P    | 2980.582 | 2990.396 | 3479.242 | 3471.302 | 3700.542 | 3355.366 | 2474.932 | 2506.261 | 3482.269 | 3291.207 | 2208.354  | 3339.763 | 0.152032 | 0.493949 | -0.1555  | 0.503618 | -0.09367 | 0.822682 |
| AT3G05600 | AT3G05600 | 42.80054 | 49.95889 | 64.38272 | 80.00862 | 71.54647 | 77.75358 | 62.25124 | 62.57562 | 75.17094 | 65.24842 | 54.54369  | 76.65708 | 0.524068 | 0.039789 | 0.330969 | 0.260307 | 0.314797 | 0.490609 |
| AT3G05602 | AT3G05602 | 0        | 0        | 0        | 0        | 0        | 0        | 0        | 0        | 0        | 0        | 0         | 0        | #N/A     | #N/A     | #N/A     | #N/A     | #N/A     | #N/A     |
| AT3G05610 | PME21     | 0        | 0        | 1.287654 | 0        | 0        | 0        | 0.889303 | 0        | 0        | 0        | 0         | 0        | -0.21946 | NA       | -0.0473  | NA       | -0.20113 | NA       |
| AT3G05620 | PME22     | 8.322328 | 7.136984 | 10.30123 | 3.71174  | 3.312336 | 7.974726 | 8.003731 | 2.15778  | 2.928738 | 7.676285 | 7.982004  | 8.287252 | -0.66231 | 0.268348 | -0.69675 | 0.276735 | -0.08373 | NA       |
| AT3G05625 | AT3G05625 | 71.33424 | 67.80135 | 75.97161 | 79.59621 | 69.55906 | 59.81045 | 90.70896 | 80.91675 | 114.2208 | 104.5894 | 66.5167   | 65.67508 | -0.02937 | 0.932505 | 0.391546 | 0.161236 | 0.202609 | 0.684953 |
| AT3G05630 | PIDP2     | 30.9115  | 21.41095 | 20.60247 | 65.16166 | 52.99738 | 92.70619 | 58.69403 | 58.26006 | 23.4299  | 11.51443 | 13.30334  | 13.46678 | 1.37427  | 0.000158 | 0.836441 | 0.038808 | -0.80111 | 0.209487 |
| AT3G05640 | AT3G05640 | 238.9697 | 269.4212 | 323.2012 | 181.4629 | 162.9669 | 176.4408 | 152.9602 | 163.9913 | 140.5794 | 347.3519 | 267.3971  | 283.8384 | -0.66011 | 0.000112 | -0.84438 | 1.24E-06 | 0.11425  | 0.752033 |
| AT3G05650 | ATRLP32   | 340.0265 | 240.8732 | 249.8049 | 341.8925 | 316.6594 | 374.8121 | 224.1045 | 203.9102 | 108.3633 | 204.3811 | 248.7725  | 202.0018 | 0.298783 | 0.262836 | -0.60876 | 0.017617 | -0.33519 | 0.422952 |
| AT3G05660 | ATRLP33   | 72.52314 | 69.5856  | 64.38272 | 58.97543 | 63.59686 | 70.7757  | 43.57587 | 45.31338 | 24.40615 | 42.21957 | 53.21336  | 52.83123 | -0.09859 | 0.762866 | -0.82259 | 0.003228 | -0.46122 | 0.284968 |
| AT3G05670 | AT3G05670 | 448.2168 | 346.1347 | 355.3926 | 329.1076 | 355.7449 | 429.6384 | 393.9614 | 461.7649 | 426.6195 | 319.5254 | 317.9498  | 361.5314 | -0.05569 | 0.793142 | 0.149036 | 0.459046 | -0.2029  | 0.494715 |
| AT3G05675 | AT3G05675 | 96.30122 | 94.56504 | 92.71111 | 105.9908 | 109.3071 | 126.5988 | 141.3993 | 108.9679 | 100.5533 | 111.3061 | 82.48071  | 99.44703 | 0.251688 | 0.288834 | 0.30149  | 0.224156 | 0.055112 | 0.920455 |
| AT3G05680 | EMB2016   | 645.5748 | 547.7635 | 462.2679 | 252.8107 | 230.5386 | 294.068  | 345.9391 | 402.4259 | 209.8929 | 446.1841 | 391.1182  | 399.8599 | -1.05804 | 7.51E-07 | -0.76426 | 0.000627 | -0.40633 | 0.242454 |
| AT3G05685 | AT3G05685 | 10.70014 | 7.136984 | 7.725926 | 11.13522 | 13.24935 | 7.974726 | 7.114428 | 7.55223  | 13.66744 | 9.595356 | 10.64267  | 7.251346 | 0.282528 | 0.629312 | 0.097393 | 0.890168 | 0.054732 | NA       |
| AT3G05690 | DFY42     | 74.90095 | 99.91778 | 81.12222 | 214.0437 | 221.9265 | 185.4124 | 150.2923 | 105.7312 | 121.0545 | 62.36982 | 89.13238  | 95.33931 | 1.257278 | 2.89E-09 | 0.555317 | 0.022092 | -0.03962 | 0.950436 |
| AT3G05700 | D19-3     | 129.5905 | 148.0924 | 140.3543 | 222.292  | 258.3622 | 213.3239 | 280.1306 | 201.7524 | 204.5888 | 154.4852 | 163.6311  | 185.4273 | 0.717695 | 0.000197 | 0.895038 | 3.1E-06  | 0.264438 | 0.456137 |
| AT3G05710 | SP43      | 191.4135 | 246.226  | 242.079  | 315.4979 | 296.1229 | 313.008  | 321.0386 | 293.4581 | 285.0638 | 248.5197 | 211.5231  | 253.7971 | 0.444672 | 0.004993 | 0.406158 | 0.012791 | 0.081391 | 0.81742  |
| AT3G05720 | IMPAT7    | 2.377808 | 1.784246 | 1.287654 | 1.649662 | 1.324935 | 0.996841 | 2.66791  | 1.07889  | 0.972646 | 3.881143 | 1.330334  | 1.035907 | -0.20008 | 0.804864 | -0.08411 | 0.925139 | 0.112488 | NA       |
| AT3G05725 | AT3G05725 | 0        | 0        | 0        | 0        | 0        | 0        | 0.889303 | 0        | 0        | 0        | 0         | 0        | #N/A     | #N/A     | 0.160764 | NA       | 0.20994  | NA       |
| AT3G05727 | AT3G05727 | 38.04493 | 26.76369 | 37.34198 | 94.03075 | 82.80841 | 140.5545 | 37.35075 | 37.76115 | 72.2422  | 23.98839 | 13.30334  | 20.71813 | 1.498248 | 3.47E-06 | 0.466959 | 0.241247 | -0.71714 | 0.209942 |
| AT3G05730 | AT3G05730 | 236.5919 | 403.2396 | 330.9272 | 478.8145 | 362.3696 | 310.0175 | 293.4701 | 228.7247 | 360.2348 | 351.19   | 294.0038  | 283.8384 | 0.247478 | 0.359162 | -0.12552 | 0.688102 | -0.05402 | 0.928827 |
| AT3G05740 | RECQ11    | 41.61164 | 28.54794 | 29.61605 | 17.73387 | 21.19895 | 29.90522 | 22.23259 | 12.96668 | 11.71495 | 40.3005  | 51.88302  | 48.68761 | -0.54742 | 0.135185 | -0.97957 | 0.009656 | 0.447535 | 0.442386 |
| AT3G05741 | AT3G05741 | 0        | 0        | 0        | 0        | 0        | 0        | 0        | 0        | 0        | 0        | 0         | 0        | #N/A     | #N/A     | #N/A     | #N/A     | #N/A     | #N/A     |
| AT3G05746 | AT3G05746 | 0        | 0        | 0        | 0        | 0        | 0        | 0        | 0        | 0        | 0        | 0         | 0        | #N/A     | #N/A     | #N/A     | #N/A     | #N/A     | #N/A     |
| AT3G05750 | AT3G05750 | 175.9578 | 178.4246 | 145.5049 | 139.3965 | 147.0677 | 147.5324 | 163.6318 | 170.4646 | 157.1756 | 165.9997 | 139.6851  | 164.7091 | -0.19984 | 0.283943 | -0.02112 | 0.931725 | -0.07572 | 0.849248 |
| AT3G05755 | AT3G05755 | 0        | 0        | 0        | 0        | 0        | 0        | 0        | 0        | 0        | 0        | 0         | 0        | #N/A     | #N/A     | #N/A     | #N/A     | #N/A     | #N/A     |
| AT3G05760 | AT3G05760 | 140.2907 | 157.0137 | 122.3272 | 226.4162 | 219.9391 | 155.5072 | 149.403  | 170.4646 | 290.9213 | 117.0633 | 93.12338  | 153.3142 | 0.503621 | 0.080527 | 0.517493 | 0.084127 | -0.18782 | 0.74448  |
| AT3G05770 | AT3G05770 | 0        | 0        | 0        | 0.824831 | 0        | 0        | 0.889303 | 1.07889  | 0.972646 | 0        | 0         | 0        | 0.173022 | NA       | 0.517009 | NA       | 0        | NA       |
| AT3G05780 | LN03      | 1.188904 | 1.784246 | 0        | 0        | 0        | 0        | 0.889303 | 1.07889  | 0.972646 | 0        | 1.330334  | 0        | -0.62835 | NA       | 0.055777 | NA       | -0.27651 | NA       |
| AT3G05790 | LN04      | 13.07794 | 16.05821 | 7.725926 | 6.186234 | 5.962205 | 4.984204 | 6.225124 | 11.86779 | 4.88123  | 18.23118 | 22.61568  | 18.64632 | -0.86873 | 0.082226 | -0.55062 | 0.332225 | 0.628466 | NA       |
| AT3G05800 | BHLH150   | 9.23203  | 53.52738 | 37.34198 | 40.00431 | 41.73544 | 46.85152 | 68.46737 | 85.23231 | 137.8802 | 41.26003 | 33.25835  | 52.83123 | -0.01207 | 0.977307 | 1.067766 | 0.00035  | -0.00345 | 0.996883 |
| AT3G05810 | AT3G05810 | 61.83301 | 46.39074 | 61.80471 | 117.5384 | 125.2063 | 93.70303 | 93.37687 | 63.65451 | 137.6561 | 91.15588 | 86.47171  | 97.37521 | 0.924997 | 0.000708 | 0.737851 | 0.011335 | 0.641039 | 0.919276 |
| AT3G05820 | INVH      | 7.133424 | 8.92123  | 6.438272 | 5.361402 | 3.974804 | 8.971567 | 3.557214 | 4.31556  | 3.904984 | 2.878607 | 2.660668  | 3.10772  | -0.2269  | 0.743861 | -0.65863 | 0.322447 | -0.91924 | NA       |
| AT3G05830 | AT3G05830 | 115.3237 | 103.4863 | 130.0531 | 226.0037 | 243.1255 | 210.3334 | 170.7463 | 142.4135 | 174.748  | 107.468  | 131.7031  | 125.3447 | 0.936862 | 5.29E-08 | 0.466396 | 0.017137 | 0.046477 | 0.923603 |
| AT3G05835 | AT3G05835 | 0        | 0        | 0        | 0        | 0        | 0        | 0        | 0        | 0        | 0        | 0         | 0        | #N/A     | #N/A     | #N/A     | #N/A     | #N/A     | #N/A     |
| AT3G05840 | ASK3      | 1081.903 | 1118.722 | 1118.972 | 960.1035 | 1152.031 | 1097.522 | 1234.353 | 1142.544 | 926.4574 | 1062.206 | 1106.838  | 1088.738 | -0.0492  | 0.779712 | -0.00641 | 0.973945 | -0.02678 | 0.939635 |
| AT3G05850 | AT3G05850 | 131.9683 | 113.6984 | 77.25926 | 60.62509 | 54.32232 | 56.81992 | 88.93035 | 77.68008 | 49.78855 | 80.60099 | 89.13238  | 95.3034  | -0.85339 | 0.0009   | -0.53648 | 0.057398 | -0.26056 | 0.952351 |
| AT3G05858 | AT3G05858 | 0        | 0        | 0        | 0.824831 | 0        | 0.662467 | 0        | 0        | 0        | 0        | 1.330334  | 1.035907 | 0.312498 | NA       | 0        | NA       | 0.393084 | NA       |
| AT3G05860 | AT3G05860 | 0        | 0        | 0        | 0        | 0        | 0        | 0        | 0        | 0        | 0        | 0         | 0        | #N/A     | #N/A     | #N/A     | #N/A     | #N/A     | #N/A     |
| AT3G05870 | APC11     | 34.47821 | 35.68492 | 30.9037  | 45.77813 | 43.72284 | 45.85468 | 40.01866 | 34.52448 | 41.97858 | 45.09817 | 39.91002  | 39.36445 | 0.403612 | 0.18134  | 0.199668 | 0.587107 | 0.289578 | 0.595333 |
| AT3G05880 | RC12A     | 214.0027 | 135.6027 | 176.4086 | 346.0167 | 343.8205 | 298.0554 | 611.8408 | 388.4004 | 1272.409 | 338.7161 | 437.6799  | 405.0395 | 0.798939 | 0.049954 | 1.874286 | 6.23E-07 | 1.027955 | 0.054332 |
| AT3G05890 | RC12B     | 9.511232 | 7.136984 | 11.58889 | 6.186234 | 7.949607 | 9.968408 | 4.446517 | 2.15778  | 16.59618 | 20.15025 | 10.64267  | 9.323159 | -0.21711 | 0.749537 | -0.22166 | 0.761622 | 0.395986 | NA       |
| AT3G05900 | AT3G05900 | 323.3819 | 231.952  | 267.8321 | 87.4321  | 153.6924 | 88.71883 | 128.949  | 74.44341 | 124.9595 | 191.9071 | 256.7545  | 162.0844 | -1.25902 | 8.74E-07 | -1.26004 | 1.35E-06 | -0.20702 | 0.693266 |
| AT3G05905 | AT3G05905 | 0        | 1.784246 | 0        | 1.649662 | 1.987402 | 0.996841 | 0.889303 | 0        | 1.952492 | 1.919071 | 1.330334  | 1.035907 | 0.502579 | 0.407094 | 0.198778 | 0.805038 | -0.41305 | NA       |
| AT3G05910 | PAE12     | 1813.079 | 1893.085 | 1873.537 | 1229.411 | 1307.048 | 1490.277 | 977.3445 | 942.9498 | 833.7141 | 1967.048 | 1980.867  | 1829.411 | -0.46865 | 3.67E-05 | -1.00872 | 4.07E-20 | 0.049998 | 0.852376 |
| AT3G05920 | AT3G05920 | 0        | 0        | 0        | 0.412416 | 0        | 0        | 0.889303 | 0        | 0        | 0        | 1.330334  | 0        | 0.065278 | NA       | 0.149821 | NA       | 0.193775 | NA       |
| AT3G05930 | GLP8      | 0        | 0        | 0        | 0.412416 | 0.662467 | 0.996841 | 0        | 3.23667  | 0        | 0.76479  | 0.3822854 | 0        | 0.340143 | NA       | 0.493375 | NA       | 0        | NA       |
| AT3G05932 | AT3G05932 | 34.47821 | 41.03766 | 56.65679 | 39.17948 | 43.72284 | 44.85784 | 56.02612 | 50.70783 | 60.45074 | 55.87403 | 38.32854  | 0        | -0.05926 | 0.875245 | 0.239744 | 0.495334 | 0.210979 | 0.717573 |
| AT3G05935 | AT3G05935 | 107.0014 | 115.976  | 95.28642 | 89.08176 | 108.6446 | 102.6746 | 127.1704 | 86.3112  | 75.17094 | 123.7801 | 188.9074  | 99.44703 | -0.08008 | 0.819325 | -0.12621 | 0.727145 | 0.350232 | 0.453672 |
| AT3G05936 | AT3G05936 | 40.42273 | 57.09587 | 56.65679 | 105.9908 | 100.0326 | 75.7599  | 145.8458 | 97.10009 | 118.1258 | 46.05771 | 89.13238  | 66.29802 | 0.84033  | 0.002938 | 1.173964 | 0.000023 | 0.353067 | 0.499012 |
| AT3G05937 | AT3G05937 | 40.42273 | 44.60615 | 36.05432 | 65.57408 | 72.20893 | 69.77885 | 108.495  | 89.54786 | 159.1281 | 39.34096 | 47.89202  |          |          |          |          |          |          |          |

|           |           |          |          |           |          |          |           |          |          |          |          |          |           |          |          |           |          |          |          |
|-----------|-----------|----------|----------|-----------|----------|----------|-----------|----------|----------|----------|----------|----------|-----------|----------|----------|-----------|----------|----------|----------|
| AT3G06380 | TULP9     | 334.082  | 340.791  | 352.8173  | 449.1206 | 422.6541 | 414.6858  | 487.3383 | 494.1316 | 487.1468 | 293.6179 | 284.6915 | 282.8025  | 0.324688 | 0.007216 | 0.510258  | 1.59E-05 | -0.25173 | 0.193952 |
| AT3G06390 | AT3G06390 | 1.188904 | 1.784246 | 1.287654  | 3.71174  | 3.312336 | 3.987363  | 0.889303 | 3.236621 | 0.976246 | 0        | 0        | 0.1035907 | 0.801468 | 0.241173 | 0.090957  | 0.910148 | -0.50746 | NA       |
| AT3G06400 | CHR11     | 1042.669 | 927.8079 | 885.9062  | 758.0198 | 776.4116 | 836.3494  | 865.2923 | 1071.338 | 849.334  | 995.0384 | 956.5101 | 855.6588  | -0.26814 | 0.063554 | -0.03751  | 0.846495 | -0.02575 | 0.943411 |
| AT3G06410 | AT3G06410 | 236.5919 | 178.4246 | 207.3123  | 186.8243 | 178.2037 | 181.425   | 170.7463 | 142.4135 | 205.9879 | 199.5834 | 164.9614 | 191.6427  | -0.19068 | 0.357145 | -0.26185  | 0.218727 | -0.16224 | 0.652663 |
| AT3G06420 | ATGH8     | 38.04493 | 87.42806 | 68.24568  | 162.4917 | 146.4053 | 152.5166  | 148.3137 | 110.0468 | 211.8454 | 78.68192 | 91.79304 | 71.47755  | 1.205666 | 0.000013 | 1.231612  | 0.000011 | 0.316125 | 0.560856 |
| AT3G06430 | EMB2750   | 613.4744 | 517.4313 | 557.5453  | 311.7862 | 351.1077 | 359.8595  | 439.3159 | 484.4216 | 524.2441 | 483.606  | 494.8842 | 545.9227  | -0.72319 | 3.266208 | -0.12739  | 3.266208 | -0.14882 | 0.563694 |
| AT3G06433 | AT3G06433 | 104.6235 | 107.0548 | 86.27284  | 124.5495 | 102.02   | 86.72515  | 93.37687 | 100.3368 | 133.7457 | 94.99403 | 82.48071 | 96.33931  | 0.09082  | 0.754318 | 0.134958  | 0.651095 | -0.1089  | 0.838414 |
| AT3G06435 | AT3G06435 | 16.26685 | 14.27397 | 15.150617 | 12.37247 | 6.624673 | 13.596618 | 15.32527 | 5.39445  | 16.59618 | 15.32527 | 17.29434 | 18.646362 | -0.02701 | 0.967714 | -0.11978  | 0.863085 | 0.517489 | NA       |
| AT3G06437 | AT3G06437 | 14.26685 | 12.48972 | 10.30123  | 11.96005 | 17.22415 | 11.96209  | 5.335821 | 6.47334  | 13.66744 | 10.55489 | 10.64267 | 14.50269  | 0.134997 | 0.819272 | -0.44773  | 0.493979 | -0.04166 | NA       |
| AT3G06440 | B3GALT16  | 254.4254 | 324.7328 | 240.7914  | 184.7622 | 197.4152 | 195.3808  | 242.7799 | 190.9635 | 178.653  | 254.2769 | 248.7725 | 250.6894  | -0.48885 | 0.004735 | -0.40043  | 0.030632 | -0.10932 | 0.764628 |
| AT3G06450 | BOR3      | 357.8601 | 322.9485 | 343.8037  | 546.4506 | 486.9134 | 542.2814  | 490.0062 | 526.4983 | 419.7858 | 299.3751 | 263.4061 | 367.7468  | 0.608197 | 8.85E-05 | 0.475834  | 0.00368  | -0.13541 | 0.675176 |
| AT3G06455 | AT3G06455 | 52.31177 | 66.0171  | 68.24568  | 51.55195 | 70.884   | 44.85784  | 52.46891 | 47.47116 | 73.21845 | 51.81492 | 61.19536 | 49.72351  | -0.13543 | 0.689416 | -0.09354  | 0.808033 | -0.18668 | 0.748719 |
| AT3G06460 | AT3G06460 | 0        | 0        | 1.287654  | 0        | 0        | 0         | 0.889303 | 0        | 0        | 0        | 0        | 1.035907  | -0.25385 | NA       | -0.05639  | NA       | -0.03516 | NA       |
| AT3G06470 | AT3G06470 | 136.724  | 117.7602 | 132.6284  | 122.4874 | 139.1181 | 149.5261  | 118.2774 | 116.5201 | 146.4369 | 116.1038 | 125.0514 | 117.0574  | 0.06685  | 0.780586 | -0.02833  | 0.917206 | -0.11914 | 0.770425 |
| AT3G06480 | RH40      | 279.3924 | 231.952  | 200.8741  | 174.8642 | 133.1559 | 208.3397  | 173.4142 | 208.2258 | 133.7457 | 190.9476 | 250.1028 | 178.1759  | -0.45413 | 0.06164  | -0.45279  | 0.656746 | -0.20057 | 0.656746 |
| AT3G06483 | PKD       | 3312.55  | 1577.273 | 1518.144  | 1328.391 | 1369.32  | 1421.495  | 1745.703 | 1689.542 | 1533.682 | 1547.731 | 1732.095 | 1489.634  | -0.09597 | 0.49718  | 0.173083  | 0.204958 | 0.113396 | 0.617041 |
| AT3G06490 | MYB108    | 2.377808 | 5.352738 | 2.575309  | 7.635896 | 7.28714  | 14.95261  | 16.89677 | 8.63112  | 8.786214 | 1.919071 | 2.660668 | 0         | 1.11221  | 0.058102 | 1.301971  | 0.029613 | -0.57179 | NA       |
| AT3G06500 | INVC      | 517.1732 | 517.4313 | 544.6778  | 696.9823 | 691.6158 | 769.5611  | 1134.751 | 1184.621 | 941.1011 | 604.5074 | 570.7133 | 599.7899  | 0.44243  | 0.000554 | 1.033785  | 8.56E-18 | 0.166759 | 0.473723 |
| AT3G06510 | SFR2      | 853.633  | 943.8662 | 827.9617  | 791.0131 | 649.8804 | 660.9054  | 1093.843 | 1149.018 | 1006.51  | 851.1081 | 690.4433 | 871.1974  | -0.31195 | 0.034616 | 0.305254  | 0.045314 | -0.11622 | 0.681742 |
| AT3G06520 | AT3G06520 | 24.96698 | 21.41095 | 15.30123  | 12.37247 | 10.59948 | 12.95893  | 14.22886 | 11.86779 | 15.61994 | 13.4335  | 17.29434 | 19.68222  | -0.57573 | 0.020164 | -0.37625  | 0.464494 | -0.14655 | NA       |
| AT3G06530 | AT3G06530 | 589.6964 | 346.1437 | 426.2136  | 223.1168 | 259.6872 | 285.0965  | 293.4701 | 333.377  | 224.5366 | 379.9761 | 361.8508 | 419.5421  | -0.81189 | 9.73E-05 | -0.66349  | 0.002281 | -0.22759 | 0.561641 |
| AT3G06540 | REP       | 198.547  | 158.7979 | 164.8198  | 251.1611 | 210.6646 | 238.2449  | 218.7687 | 250.3025 | 172.7955 | 134.335  | 150.3277 | 152.2783  | 0.089972 | 0.033343 | 0.282686  | 0.18785  | -0.25928 | 0.443724 |
| AT3G06545 | AT3G06545 | 0        | 0        | 0         | 0        | 0        | 0         | 0.889303 | 0        | 0.959536 | 0        | 0        | 0         | 0        | NA       | 0.13694   | NA       | 0.147196 | NA       |
| AT3G06550 | AT3G06550 | 640.8192 | 579.88   | 588.458   | 423.9632 | 396.8179 | 482.4709  | 411.7475 | 409.9782 | 281.1588 | 578.6    | 597.32   | 547.9946  | -0.46895 | 0.00444  | -0.70229  | 1.55E-05 | -0.07004 | 0.852822 |
| AT3G06560 | PAP53     | 0        | 0        | 0         | 0        | 1.324935 | 0         | 0        | 0.976246 | 0.959536 | 1.330334 | 1.035907 | 0         | 2.1801   | NA       | 0.15433   | NA       | 0.532942 | NA       |
| AT3G06570 | AT3G06570 | 86.78999 | 101.702  | 77.25926  | 63.512   | 69.55906 | 64.79465  | 71.14428 | 64.7334  | 99.57709 | 91.15588 | 83.81104 | 87.01615  | -0.40184 | 0.096368 | -0.15573  | 0.596875 | -0.00613 | 0.992818 |
| AT3G06580 | GALL1     | 471.9949 | 458.5512 | 498.3222  | 516.3443 | 479.6263 | 467.5183  | 488.2276 | 458.5282 | 467.6218 | 393.4096 | 413.7339 | 448.5745  | 0.036178 | 0.819013 | -0.05161  | 0.929713 | -0.18652 | 0.366371 |
| AT3G06590 | BHLH148   | 293.6593 | 274.7739 | 275.558   | 223.9417 | 197.4152 | 170.4598  | 186.5737 | 172.6224 | 187.9322 | 296.4965 | 311.2981 | 241.3662  | -0.49234 | 0.002884 | -0.61472  | 0.000269 | 0.004825 | 0.992201 |
| AT3G06600 | AT3G06600 | 4.755616 | 7.136984 | 6.43872   | 3.71174  | 5.962205 | 7.974726  | 3.557214 | 0.976246 | 6.716749 | 2.660668 | 9.323159 | 0         | -0.055   | 0.944745 | -0.77689  | 0.24841  | 0.071635 | NA       |
| AT3G06610 | AT3G06610 | 137.9129 | 164.1506 | 177.6963  | 252.3983 | 213.9769 | 190.3966  | 170.7463 | 169.3857 | 255.7765 | 202.462  | 133.0334 | 180.2477  | 0.445732 | 0.061456 | 0.303836  | 0.252431 | 0.108946 | 0.836577 |
| AT3G06620 | AT3G06620 | 260.37   | 292.6163 | 249.8040  | 76.7265  | 178.8662 | 261.1723  | 259.6766 | 294.537  | 221.6078 | 243.722  | 220.8354 | 209.2531  | -0.2408  | 0.239564 | -0.04535  | 0.86354  | -0.24169 | 0.466622 |
| AT3G06630 | AT3G06630 | 19.02246 | 14.27397 | 15.45185  | 17.37387 | 9.274542 | 21.9305   | 16.00746 | 11.86779 | 3.904984 | 17.27164 | 14.63367 | 17.61041  | -0.01529 | 0.980216 | -0.05191  | 0.348421 | 0.016523 | NA       |
| AT3G06640 | AT3G06640 | 26.15589 | 14.27397 | 12.87654  | 7.42348  | 9.274542 | 13.95577  | 5.335821 | 8.63112  | 3.904984 | 13.4335  | 17.29434 | 17.61041  | -0.74902 | 0.011497 | -1.30934  | 0.008006 | -0.14242 | NA       |
| AT3G06650 | ACL-1     | 1438.574 | 1407.77  | 1430.584  | 894.5264 | 865.8447 | 1007.806  | 933.7687 | 1026.024 | 639.4411 | 1485.361 | 1420.797 | 1188.185  | -0.61615 | 0.000355 | -0.7043   | 0.000046 | -0.06184 | 0.879636 |
| AT3G06660 | AT3G06660 | 149.8019 | 121.3287 | 132.6284  | 205.383  | 188.8032 | 179.4313  | 136.9527 | 131.6246 | 147.4131 | 124.7396 | 142.3457 | 142.9551  | 0.494957 | 0.004058 | 0.032959  | 0.897517 | 0.008488 | 0.987638 |
| AT3G06665 | AT3G06665 | 0        | 0        | 0         | 0.412416 | 0        | 0         | 0        | 0        | 0        | 0        | 0        | 0         | 0.095918 | NA       | 0.0       | NA       | 0.0      | NA       |
| AT3G06670 | AT3G06670 | 722.8536 | 674.445  | 692.758   | 575.7321 | 493.5381 | 587.1392  | 606.505  | 706.6729 | 508.6242 | 679.3512 | 562.7313 | 659.8725  | -0.33178 | 0.037389 | -0.19689  | 0.272555 | -0.13277 | 0.657295 |
| AT3G06680 | RPL29B    | 60.6341  | 42.8219  | 57.94445  | 70.11065 | 78.83361 | 55.82308  | 42.68657 | 38.84004 | 68.60085 | 52.77446 | 53.21336 | 94.26749  | 0.30904  | 0.449705 | 0.134333  | 0.782174 | 0.276561 | 0.695023 |
| AT3G06690 | AT3G06690 | 90.3567  | 67.80135 | 95.28642  | 104.3411 | 114.6068 | 105.6651  | 96.04478 | 107.889  | 87.86214 | 68.12703 | 66.5167  | 78.7289   | 0.330377 | 1.137608 | 0.177997  | 0.500212 | -0.25402 | 0.528954 |
| AT3G06700 | RPL29A    | 325.7597 | 267.6369 | 302.5988  | 516.5767 | 506.7875 | 335.9353  | 277.4627 | 221.1724 | 632.6074 | 402.0544 | 556.0796 | 534.5278  | 0.561383 | 0.087754 | 0.311968  | 0.40555  | 0.684599 | 0.133779 |
| AT3G06710 | AT3G06710 | 15.45575 | 7.136984 | 19.31482  | 11.96005 | 19.21155 | 8.971567  | 8.893035 | 17.26224 | 15.92492 | 12.47396 | 10.64267 | 9.323159  | -0.07133 | 0.908346 | 0.064475  | 0.925216 | -0.33449 | NA       |
| AT3G06720 | IMPA1     | 599.2076 | 524.5683 | 481.5827  | 390.1451 | 396.8179 | 407.7079  | 410.8582 | 499.526  | 474.4556 | 373.2594 | 383.1362 | 414.3626  | -0.42409 | 0.002006 | -0.21377  | 0.17192  | -0.45106 | 0.011195 |
| AT3G06730 | CITRX     | 240.1586 | 314.0273 | 293.5825  | 313.0234 | 293.473  | 250.207   | 286.3557 | 251.3814 | 376.831  | 318.5658 | 437.6799 | 250.6894  | 0.021369 | 0.946984 | -0.096612 | 0.717665 | 0.239007 | 0.567708 |
| AT3G06740 | GATA15    | 159.3131 | 146.3082 | 166.1074  | 174.4518 | 205.3649 | 146.5356  | 144.9565 | 101.4157 | 194.273  | 229.329  | 297.9948 | 161.6014  | 0.151389 | 0.638735 | -0.09411  | 0.797798 | 0.514769 | 0.203688 |
| AT3G06750 | AT3G06750 | 227.0807 | 230.1677 | 213.7506  | 119.1881 | 104.6698 | 100.6809  | 81.81592 | 84.15342 | 87.86214 | 240.8434 | 333.9138 | 168.2014  | -1.00251 | 1.01E-05 | -1.34572  | 5.32E-09 | 0.124951 | 0.803737 |
| AT3G06760 | DI19-4    | 219.9472 | 192.6986 | 193.1482  | 257.3473 | 262.9995 | 220.3018  | 178.75   | 176.938  | 170.8691 | 202.462  | 212.8534 | 208.2172  | 0.288077 | 0.084167 | -0.09914  | 0.639158 | 0.03522  | 0.933182 |
| AT3G06770 | AT3G06770 | 155.9843 | 397.8869 | 479.0704  | 138.984  | 181.516  | 187.4061  | 145.8458 | 129.4668 | 200.1304 | 445.2245 | 482.9112 | 408.1472  | -1.43207 | 3.8E-15  | -1.52126  | 3.85E-16 | -0.06282 | 0.889818 |
| AT3G06778 | AT3G06778 | 13.07794 | 16.05821 | 18.02716  | 13.1973  | 16.16168 | 3.987363  | 16.00746 | 5.39445  | 10.73871 | 43.2235  | 14.63367 | 9.323159  | -0.34716 | 0.355072 | -0.43132  | 0.465199 | -0.27657 | NA       |
| AT3G06780 | AT3G06780 | 135.535  | 173.0719 | 155.8062  | 145.1703 | 131.1685 | 148.5293  | 128.949  | 168.3068 | 217.7029 | 177.5141 | 135.6941 | 154.3501  | -0.11895 | 0.65628  | 0.149393  | 0.587819 | 0.021258 | 0.97247  |
| AT3G06790 | MORF3     | 92.73451 | 89.2123  | 88.84815  | 151.7689 | 152.3675 | 100.6809  | 120.056  |          |          |          |          |           |          |          |           |          |          |          |



|           |           |          |          |          |          |          |          |          |          |           |          |          |           |          |          |          |          |           |          |          |
|-----------|-----------|----------|----------|----------|----------|----------|----------|----------|----------|-----------|----------|----------|-----------|----------|----------|----------|----------|-----------|----------|----------|
| AT3G07250 | AT3G07250 | 4.755616 | 3.568492 | 5.150617 | 4.124156 | 6.624673 | 3.987363 | 7.114428 | 3.23667  | 4.88123   | 5.757214 | 1.330334 | 2.071813  | 0.084654 | 0.91501  | 0.124868 | 0.881025 | -0.32609  | NA       |          |
| AT3G07260 | FHA1      | 33.28931 | 41.03766 | 36.05432 | 37.94223 | 36.4357  | 36.88311 | 39.12935 | 26.97225 | 56.62227  | 33.58375 | 14.63367 | 22.78994  | 0.023506 | 0.959909 | 0.157173 | 0.727145 | -0.54165  | 0.353829 |          |
| AT3G07270 | GCH1      | 401.8495 | 310.4588 | 280.7086 | 251.9859 | 292.8105 | 298.5505 | 310.3669 | 397.0315 | 47.52021  | 265.7914 | 266.0668 | 269.3357  | -0.23765 | 0.267419 | 0.238786 | 0.286061 | -0.40492  | 0.239691 |          |
| AT3G07273 | AT3G07273 | 38.04493 | 33.90067 | 60.51975 | 44.9533  | 55.64725 | 49.84204 | 78.25871 | 51.78672 | 47.83605  | 48.93632 | 41.24035 | 40.40035  | 0.152453 | 0.678625 | 0.392506 | 0.255276 | -0.02981  | 0.97247  |          |
| AT3G07274 | AT3G07274 | 102.2457 | 92.78079 | 86.27284 | 99.39215 | 114.6068 | 124.6051 | 116.4988 | 132.7035 | 142.5319  | 118.0229 | 125.0514 | 98.41112  | 0.243338 | 0.283702 | 0.459813 | 0.036125 | 0.264212  | 0.474444 |          |
| AT3G07280 | AT3G07280 | 312.6817 | 289.0479 | 234.3531 | 258.5846 | 306.7223 | 327.9606 | 392.1828 | 347.574  | 228.3695  | 547.674  | 228.6959 | 272.7185  | 245.5098 | 0.088398 | 0.732248 | 0.056866 | 0.003359  | -0.16096 | 0.694983 |
| AT3G07290 | AT3G07290 | 22.58917 | 8.92123  | 20.60247 | 17.73387 | 11.26194 | 11.96209 | 15.11816 | 19.42002 | 13.66744  | 26.867   | 21.28534 | 26.93357  | -0.31968 | 0.500065 | -0.14837 | 0.7933   | -0.437551 | 0.550622 |          |
| AT3G07300 | AT3G07300 | 271.0701 | 306.8903 | 262.6815 | 298.5889 | 312.6846 | 318.899  | 309.4776 | 276.1958 | 239.1803  | 252.5739 | 172.9434 | 250.6884  | -0.14605 | 0.477883 | -0.02153 | 0.933387 | -0.29557  | 0.310967 |          |
| AT3G07310 | AT3G07310 | 1046.235 | 1027.726 | 994.0692 | 606.6633 | 712.8148 | 581.1582 | 782.5871 | 690.4896 | 902.0513  | 994.0789 | 1172.024 | 883.6283  | -0.67913 | 5.81E-06 | -0.36294 | 0.026979 | -0.00995  | 0.983067 |          |
| AT3G07320 | AT3G07320 | 177.1467 | 126.6815 | 117.1765 | 103.1039 | 91.42048 | 107.6588 | 86.26244 | 87.39009 | 78.09968  | 156.4043 | 115.7391 | 84.94434  | -0.46734 | 0.067507 | -0.71704 | 0.005181 | -0.2306   | 0.62176  |          |
| AT3G07330 | CSLC6     | 331.7042 | 346.1437 | 272.9827 | 209.9195 | 206.6898 | 255.1912 | 233.8868 | 276.1958 | 179.6293  | 264.8318 | 272.7185 | 252.7612  | -0.49533 | 0.00282  | -0.45153 | 0.02616  | -0.25861  | 0.616806 |          |
| AT3G07340 | BHLH62    | 203.3026 | 205.1883 | 197.0111 | 135.6847 | 176.8788 | 220.3018 | 111.1629 | 89.54786 | 107.3871  | 196.7048 | 305.9768 | 165.745   | -0.18633 | 0.520793 | -0.92939 | 0.000206 | 0.131229  | 0.805717 |          |
| AT3G07350 | AT3G07350 | 130.7794 | 133.8185 | 135.2037 | 132.7978 | 131.831  | 175.444  | 136.9527 | 126.2301 | 132.7695  | 177.5141 | 180.9254 | 133.6319  | 0.121407 | 0.609455 | -0.01221 | 0.966292 | 0.289483  | 0.387595 |          |
| AT3G07360 | PUB8      | 1008.191 | 1090.174 | 1059.74  | 621.0979 | 631.9938 | 766.5706 | 541.5858 | 559.9439 | 660.9185  | 980.6454 | 1060.276 | 1013.117  | -0.64116 | 4.42E-07 | -0.83075 | 5.62E-11 | -0.04743  | 0.879014 |          |
| AT3G07370 | CHIP      | 127.2127 | 119.5445 | 149.3679 | 236.7265 | 227.8887 | 218.3081 | 269.4559 | 223.3302 | 250.8952  | 97.82653 | 170.2827 | 123.2729  | 0.761547 | 0.000123 | 0.880376 | 9.88E-06 | -0.03696  | 0.948116 |          |
| AT3G07380 | AT3G07380 | 3.566712 | 3.568492 | 3.862963 | 1.649662 | 2.649869 | 2.990522 | 0        | 1.07889  | 2.928738  | 6.716749 | 7.982004 | 1.035907  | -0.37427 | 0.617525 | -0.73058 | 0.315587 | 0.334169  | NA       |          |
| AT3G07390 | AIR12     | 457.728  | 428.219  | 346.379  | 457.3689 | 425.304  | 391.7584 | 346.8284 | 345.2448 | 585.7476  | 393.4096 | 411.0732 | 310.772   | 0.049058 | 0.867293 | 0.051101 | 0.870469 | -0.14006  | 0.763527 |          |
| AT3G07400 | AT3G07400 | 247.292  | 255.1472 | 234.3531 | 183.5249 | 171.579  | 181.425  | 193.8682 | 213.6202 | 148.3894  | 220.6932 | 235.4691 | 273.4793  | -0.44642 | 0.01072  | -0.39794 | 0.03292  | -0.01151  | 0.982716 |          |
| AT3G07410 | RABA5B    | 89.1678  | 90.99655 | 104.3    | 125.8764 | 152.3675 | 118.6241 | 96.04478 | 86.3112  | 125.9357  | 133.3755 | 106.4267 | 117.0574  | 0.466343 | 0.035981 | 0.111097 | 0.705024 | 0.319764  | 0.339183 |          |
| AT3G07420 | SVNC2     | 70.14533 | 57.09587 | 68.24568 | 41.65397 | 39.74804 | 40.87047 | 50.69093 | 34.52448 | 34.16861  | 62.36982 | 62.5257  | 42.42717  | -0.65256 | 0.016088 | -0.67583 | 0.019572 | -0.22652  | 0.667115 |          |
| AT3G07425 | AT3G07425 | 0        | 0        | 0        | 0        | 0        | 0        | 0.889303 | 0        | 0         | 0        | 0        | 0         | 0        | NA       | 0.160764 | NA       | NA        | NA       |          |
| AT3G07430 | emb1990   | 599.2076 | 415.7293 | 477.7198 | 340.6553 | 388.2058 | 346.9006 | 353.9428 | 360.3492 | 700.9446  | 454.8199 | 458.9652 | 459.9425  | -0.45642 | 0.074933 | -0.07617 | 0.821205 | -0.11754  | 0.831469 |          |
| AT3G07440 | AT3G07440 | 55.87849 | 74.93833 | 47.64321 | 77.12171 | 68.23413 | 60.80729 | 56.02612 | 63.65451 | 69.31347  | 72.92471 | 77.15937 | 62.15439  | 0.236634 | 0.400315 | 0.098172 | 0.776278 | 0.257124  | 0.585296 |          |
| AT3G07450 | AT3G07450 | 1.188904 | 3.568492 | 2.575309 | 0        | 1.987402 | 0        | 1.778607 | 0        | 0         | 5.757214 | 1.330334 | 1.035907  | -0.64935 | 0.339262 | -0.623   | 0.37916  | 0.135513  | 0        |          |
| AT3G07460 | AT3G07460 | 1305.417 | 1602.253 | 1627.595 | 980.7242 | 1203.703 | 1220.133 | 119.667  | 1142.544 | 1710.383  | 1470.968 | 1520.572 | 1573.542  | -0.16093 | 0.458061 | -0.16093 | 0.458061 | 0.009967  | 0.984933 |          |
| AT3G07470 | AT3G07470 | 746.6317 | 854.6538 | 885.9062 | 762.5564 | 893.6684 | 825.3842 | 742.5684 | 787.5897 | 1176.376  | 855.9058 | 880.6811 | 906.4182  | -0.00308 | 0.990404 | 0.120008 | 0.598999 | 0.08646   | 0.831662 |          |
| AT3G07480 | AT3G07480 | 537.3846 | 556.6848 | 565.2803 | 756.7826 | 831.3964 | 553.2466 | 508.6168 | 465.0016 | 861.049   | 670.7154 | 860.7621 | 570.7845  | 0.355117 | 0.178264 | 0.130005 | 0.658999 | 0.32649   | 0.436537 |          |
| AT3G07490 | CM13      | 0        | 0        | 0        | 0        | 0        | 0        | 0        | 0        | 0         | 0        | 0        | 0         | #N/A     | #N/A     | #N/A     | #N/A     | #N/A      | #N/A     |          |
| AT3G07500 | AT3G07500 | 22.58917 | 21.41095 | 24.46543 | 25.15735 | 22.52389 | 24.92102 | 20.45398 | 16.18335 | 29.28738  | 24.94793 | 23.94601 | 29.00538  | 0.072993 | 0.874443 | -0.05118 | 0.920981 | 0.168638  | 0.83622  |          |
| AT3G07510 | AT3G07510 | 70.14533 | 46.3904  | 50.21852 | 51.55195 | 56.30972 | 50.83888 | 34.68284 | 48.55005 | 61.5035   | 41.26003 | 41.24035 | 51.79533  | -0.8096  | 0.823846 | -0.2131  | 0.550519 | -0.30686  | 0.565661 |          |
| AT3G07520 | GLR1.4    | 147.4241 | 171.2876 | 123.6148 | 380.6596 | 372.3066 | 407.7079 | 263.2338 | 248.1447 | 202.0829  | 106.5085 | 95.78405 | 90.12387  | 1.375214 | 3.65E-17 | 0.686003 | 0.000124 | -0.56746  | 0.026356 |          |
| AT3G07522 | AT3G07522 | 0        | 0        | 0        | 0.412416 | 0        | 0        | 1.778607 | 2.15778  | 0         | 0.995936 | 0        | 1.035907  | 0.014959 | NA       | 0.64295  | NA       | 0.353993  | NA       |          |
| AT3G07525 | ATG10     | 47.55616 | 49.95889 | 48.30886 | 70.52306 | 73.53387 | 72.76938 | 41.79726 | 65.81229 | 49.78855  | 39.34096 | 42.57069 | 46.61579  | 0.545943 | 0.036162 | 0.091185 | 0.803597 | -0.17795  | 0.754541 |          |
| AT3G07530 | AT3G07530 | 48.74056 | 39.25349 | 50.12852 | 55.6761  | 51.67245 | 53.8294  | 58.69403 | 49.62894 | 28.31111  | 42.21957 | 58.53469 | 32.1131   | 0.20024  | 0.583596 | -0.02347 | 0.958729 | -0.07888  | 0.920203 |          |
| AT3G07540 | FH10      | 368.5602 | 256.9314 | 216.3259 | 90.31901 | 106.6572 | 96.69356 | 138.7313 | 121.9146 | 119.102   | 216.8551 | 210.1928 | 232.0431  | -1.4833  | 2.69E-14 | -1.1856  | 2.44E-08 | -0.34711  | 0.290228 |          |
| AT3G07550 | FB12      | 148.613  | 173.0719 | 173.8333 | 145.5827 | 147.0677 | 161.4882 | 174.3035 | 190.9635 | 120.0783  | 189.9881 | 199.5501 | 194.7154  | -0.12394 | 0.594496 | -0.02685 | 0.92418  | 0.234966  | 0.498675 |          |
| AT3G07560 | PEX13     | 970.1456 | 988.4723 | 844.7012 | 891.6425 | 794.9607 | 890.1788 | 733.6754 | 897.6364 | 1296.6167 | 751.3164 | 764.942  | 638.11804 | -0.11901 | 0.453642 | -0.20478 | 0.187124 | -0.37493  | 0.432323 |          |
| AT3G07565 | AT3G07565 | 178.3356 | 139.1168 | 181.5593 | 197.9595 | 247.1003 | 201.3618 | 229.4403 | 254.618  | 219.6553  | 186.1499 | 203.5411 | 161.6014  | 0.35401  | 0.059935 | 0.473032 | 0.012364 | 0.152328  | 0.743663 |          |
| AT3G07568 | AT3G07568 | 76.08985 | 69.5856  | 96.57408 | 142.6958 | 165.6168 | 121.6146 | 92.48756 | 86.3112  | 180.6055  | 103.6298 | 102.4357 | 146.0628  | 0.7767   | 0.008109 | 0.528551 | 0.101846 | 0.520005  | 0.286759 |          |
| AT3G07570 | AT3G07570 | 90.3266  | 98.13353 | 91.42346 | 151.3565 | 135.8058 | 142.5482 | 119.1667 | 92.78453 | 119.102   | 62.36982 | 69.17737 | 59.04667  | 0.613281 | 0.001655 | 0.244887 | 0.303977 | -0.53718  | 0.800487 |          |
| AT3G07580 | AT3G07580 | 19.0546  | 30.33218 | 27.04704 | 95.268   | 79.49607 | 66.78833 | 50.6903  | 61.49673 | 68.51803  | 21.10978 | 21.28534 | 20.71813  | 1.586448 | 1.39E-07 | 1.300207 | 3.83E-05 | -0.23231  | 0.715589 |          |
| AT3G07590 | AT3G07590 | 20.21137 | 35.68492 | 24.46543 | 56.50093 | 51.67245 | 51.83572 | 23.12189 | 28.05114 | 64.43224  | 25.90746 | 15.96401 | 27.96948  | 0.925133 | 0.015943 | 0.488792 | 0.273836 | -0.14252  | 0.879034 |          |
| AT3G07600 | AT3G07600 | 3.566712 | 1.784246 | 2.575309 | 9.897974 | 7.949607 | 5.981045 | 1.778607 | 3.23667  | 10.73871  | 0        | 3.991002 | 1.035907  | 1.032211 | 0.1061   | 0.554213 | 0.455215 | -0.38482  | NA       |          |
| AT3G07610 | JMJ25     | 281.7702 | 228.3835 | 216.3259 | 181.4629 | 178.2037 | 191.305  | 232.1082 | 244.908  | 173.7118  | 183.2713 | 170.2827 | 154.4327  | -0.15899 | 0.106216 | -0.15899 | 0.106216 | -0.34693  | 0.263611 |          |
| AT3G07620 | AT3G07620 | 1.188904 | 0        | 0        | 0.412416 | 0.662467 | 0        | 0        | 0        | 0         | 0        | 0        | 0         | 0.007276 | NA       | -0.22716 | NA       | -0.22076  | NA       |          |
| AT3G07630 | ADT2      | 209.2471 | 215.8938 | 230.4901 | 235.0769 | 264.9869 | 203.3555 | 339.7139 | 290.2214 | 293.85    | 189.0285 | 194.2288 | 226.8635  | 0.012535 | 0.600253 | 0.487593 | 0.004002 | -0.10116  | 0.781064 |          |
| AT3G07640 | AT3G07640 | 117.7015 | 126.6815 | 149.3679 | 211.1568 | 228.5512 | 203.3555 | 296.1381 | 288.0636 | 350.4723  | 162.1615 | 178.2648 | 188.353   | 0.692706 | 0.000041 | 1.222268 | 4.89E-14 | 0.412652  | 0.113587 |          |
| AT3G07650 | COL9      | 38.04493 | 57.09587 | 54.08148 | 209.0947 | 188.8032 | 288.087  | 310.833  | 1388.531 | 1291.573  | 67.16749 | 69.17737 | 66.29802  | 2.112574 | 2.3E-24  | 4.618182 | 1.1E-118 | -0.420691 | 0.282188 |          |
| AT3G07660 | AT3G07660 | 413.7386 | 239.089  | 260.1062 | 195.8974 | 204.0399 | 206.346  | 232.9975 | 237.3558 | 234.299   | 240.3811 | 248.7725 | 244.4739  | -0.58457 | 0.003886 | -0.37203 | 0.904829 | -0.38828  | 0.217892 |          |
| AT3G07670 | AT3G07670 | 471.9949 | 426.4348 | 44       |          |          |          |          |          |           |          |          |           |          |          |          |          |           |          |          |

|           |           |          |           |          |          |          |          |          |          |          |          |          |           |          |          |          |          |          |          |
|-----------|-----------|----------|-----------|----------|----------|----------|----------|----------|----------|----------|----------|----------|-----------|----------|----------|----------|----------|----------|----------|
| AT3G08660 | AT3G08660 | 124.8349 | 99.91778  | 86.27284 | 12.37247 | 14.57428 | 13.95577 | 9.782338 | 12.94668 | 13.66744 | 90.19635 | 61.19536 | 71.47755  | -2.76794 | 1.01E-23 | -2.87229 | 2.03E-21 | -0.45511 | 0.277049 |
| AT3G08670 | AT3G08670 | 309.115  | 230.1677  | 234.3531 | 104.3411 | 98.04516 | 129.5893 | 111.1629 | 115.4412 | 112.0046 | 172.7164 | 163.6311 | 140.8833  | -1.20415 | 3.48E-10 | -1.29409 | 5.58E-11 | -0.68395 | 0.00712  |
| AT3G08680 | AT3G08680 | 523.1177 | 396.1026  | 404.3235 | 262.2963 | 211.3271 | 259.1786 | 233.8868 | 226.5669 | 197.2016 | 820.8135 | 450.9832 | 365.675   | -0.84051 | 3.02E-07 | -0.99244 | 2.41E-09 | -0.08908 | 0.11615  |
| AT3G08690 | UBC11     | 236.5919 | 253.3629  | 231.7778 | 477.1648 | 514.0746 | 431.6321 | 473.1095 | 351.7181 | 441.2632 | 323.3635 | 385.7969 | 260.0125  | 0.961747 | 2.75E-08 | 0.796261 | 8.32E-06 | 0.412848 | 0.128698 |
| AT3G08700 | UBC12     | 0        | 0         | 0        | 0.824831 | 1.324935 | 0.996841 | 0.889303 | 0        | 0.972646 | 0        | 0        | 0         | 0.608733 | NA       | 0.352533 | NA       | 0        | NA       |
| AT3G08710 | TRX9      | 164.0687 | 187.3458  | 159.6691 | 270.5446 | 286.8483 | 236.2513 | 260.5659 | 247.0658 | 341.6861 | 155.4448 | 171.6131 | 112.9138  | 0.626837 | 0.001644 | 0.719209 | 0.000341 | -0.21021 | 0.590149 |
| AT3G08720 | ATPK2     | 76.08985 | 89.2123   | 74.68395 | 343.9546 | 374.9565 | 445.5878 | 444.6517 | 482.2638 | 440.2869 | 75.80331 | 69.17737 | 43.50807  | 2.219943 | 2.84E-32 | 2.451361 | 0.66E-39 | -0.32821 | 0.402154 |
| AT3G08730 | ATPK1     | 695.5088 | 745.8148  | 733.9633 | 775.3413 | 870.482  | 760.5895 | 594.944  | 578.285  | 521.3154 | 742.6806 | 775.5847 | 668.1597  | 0.146293 | 0.281256 | -0.35518 | 0.002436 | 0.007338 | 0.983949 |
| AT3G08740 | AT3G08740 | 1759.578 | 1951.965  | 2165.835 | 2173.842 | 2045.699 | 1743.475 | 2090.752 | 1902.083 | 2619.268 | 2619.532 | 3102.339 | 2167.116  | 0.021305 | 0.931621 | 0.166596 | 0.439952 | 0.415644 | 0.101358 |
| AT3G08750 | AT3G08750 | 1.188904 | 0         | 1.287654 | 0        | 0        | 0        | 0        | 0        | 0        | 1.919071 | 0        | 0         | -0.46467 | NA       | -0.42844 | NA       | -0.06353 | NA       |
| AT3G08760 | ATSIK     | 247.292  | 265.8527  | 215.0383 | 334.0566 | 284.8609 | 361.8532 | 414.4154 | 475.7905 | 373.9022 | 196.7048 | 180.9254 | 181.2836  | 0.423735 | 0.011567 | 0.785611 | 8.8E-07  | -0.37676 | 0.156154 |
| AT3G08762 | AT3G08762 | 0        | 0         | 0        | 0        | 0        | 0        | 0        | 1.07889  | 0        | 0        | 0        | 0         | 0.00000  | NA       | 0.16673  | NA       | 0        | NA       |
| AT3G08770 | LTP6      | 250.8587 | 272.9896  | 269.1198 | 432.2115 | 500.8253 | 335.9353 | 219.658  | 186.648  | 347.5436 | 346.3924 | 287.3521 | 380.1777  | 0.657881 | 0.004923 | -0.0688  | 0.834365 | 0.344283 | 0.380116 |
| AT3G08780 | AT3G08780 | 161.6909 | 128.4657  | 154.5185 | 180.638  | 178.2037 | 196.3776 | 154.7388 | 133.7824 | 195.2492 | 133.3755 | 148.9974 | 110.842   | 0.300845 | 0.152732 | 0.113141 | 0.668184 | -0.18677 | 0.628866 |
| AT3G08790 | AT3G08790 | 0        | 1.784246  | 1.287654 | 0        | 0        | 0.996841 | 0.889303 | 1.07889  | 0        | 0        | 0        | 0         | -0.37168 | NA       | -0.12402 | NA       | -0.28489 | NA       |
| AT3G08800 | SIEL      | 80.84547 | 85.64381  | 82.40988 | 56.91335 | 47.69764 | 57.81677 | 68.47637 | 83.07453 | 46.85981 | 91.15588 | 70.5077  | 75.62118  | -0.58942 | 0.019796 | -0.31463 | 0.279758 | -0.05619 | 0.928827 |
| AT3G08810 | AT3G08810 | 0        | 0         | 0        | 0.412416 | 0.662467 | 0.996841 | 0        | 1.07889  | 0        | 0        | 0        | 0.207183  | 0.351905 | NA       | 0.16379  | NA       | 0.355257 | NA       |
| AT3G08820 | PCMP-H84  | 14.26685 | 3.568492  | 10.30123 | 10.31039 | 11.26194 | 12.95893 | 8.893035 | 10.7889  | 19.52492 | 13.4335  | 9.312338 | 10.35907  | 0.165585 | 0.786595 | 0.333531 | 0.58207  | 0.142193 | NA       |
| AT3G08840 | AT3G08840 | 313.8706 | 342.5752  | 312.9    | 204.1457 | 196.7528 | 219.305  | 295.2488 | 298.8525 | 191.3442 | 425.0743 | 327.2622 | 381.2136  | -0.62947 | 0.000782 | -0.29436 | 0.169357 | 0.226008 | 0.50127  |
| AT3G08850 | RAPTOR1   | 968.9567 | 779.7155  | 721.0864 | 405.8169 | 347.7953 | 491.4425 | 455.3234 | 597.705  | 291.8976 | 627.5363 | 560.0706 | 547.9946  | -0.95535 | 0.000204 | -0.84672 | 0.000264 | -0.49098 | 0.1573   |
| AT3G08860 | PYD4      | 21.40027 | 17.84246  | 18.02716 | 35.88015 | 37.09817 | 37.87995 | 8.007313 | 16.18335 | 9.76246  | 25.90746 | 35.91902 | 33.14901  | 0.872833 | 0.012884 | -0.68877 | 0.113623 | 0.647521 | 0.252117 |
| AT3G08870 | LECRK1    | 63.0191  | 90.99965  | 70.82099 | 121.2502 | 131.1685 | 147.5324 | 171.4428 | 70.12785 | 59.55101 | 50.85539 | 50.55269 | 51.79533  | 0.821834 | 0.000101 | -0.13684 | 0.649078 | -0.50961 | 0.15912  |
| AT3G08880 | AT3G08880 | 105.8125 | 135.6027  | 118.4642 | 190.9484 | 204.0399 | 197.3745 | 187.643  | 137.019  | 195.2492 | 200.5429 | 206.2018 | 154.3501  | 0.707949 | 0.000317 | 0.528239 | 0.012764 | 0.629408 | 0.016156 |
| AT3G08885 | AT3G08885 | 15.45575 | 17.136984 | 16.73951 | 70.11065 | 6.637271 | 10.96525 | 2.66791  | 6.47334  | 1.952492 | 16.31211 | 21.28534 | 15.5386   | -0.72796 | 0.160553 | -1.41754 | 0.080017 | 0.34228  | NA       |
| AT3G08890 | AT3G08890 | 114.1348 | 121.3282  | 140.3543 | 138.1592 | 156.3423 | 121.6146 | 119.1667 | 81.99564 | 146.4369 | 122.8206 | 138.3547 | 147.0987  | 0.146324 | 0.586441 | -0.1054  | 0.729869 | -0.18677 | 0.82263  |
| AT3G08900 | RG3       | 0        | 0         | 0        | 1.237247 | 0.662467 | 0.996841 | 2.66791  | 1.07889  | 1.952492 | 0.99536  | 0        | 0.207183  | 0.478264 | 0.476765 | 0.88822  | 0.165241 | 0.512756 | NA       |
| AT3G08910 | AT3G08910 | 87.97889 | 87.42806  | 69.53333 | 102.0129 | 121.2315 | 110.6493 | 77.3694  | 91.70564 | 144.4844 | 82.52006 | 61.19536 | 97.37521  | 0.504734 | 0.064602 | 0.340669 | 0.266428 | -0.01096 | 0.989156 |
| AT3G08920 | STR10     | 312.6817 | 437.1403  | 374.7074 | 289.9281 | 247.7628 | 236.2513 | 260.5659 | 270.8014 | 375.2547 | 373.2594 | 292.6735 | 371.8904  | -0.51535 | 0.010017 | -0.29665 | 0.186673 | -0.10457 | 0.807804 |
| AT3G08930 | AT3G08930 | 821.5326 | 681.582   | 706.9222 | 602.1267 | 608.8074 | 658.9118 | 576.2687 | 583.6795 | 525.8203 | 650.5652 | 532.1336 | 613.2567  | -0.24341 | 0.079764 | -0.38969 | 0.004302 | -0.29581 | 0.131376 |
| AT3G08940 | LHC4.2    | 18312.69 | 21869.5   | 20218.75 | 8188.924 | 7728.343 | 7206.162 | 5535.914 | 5701.933 | 6153.279 | 18617.87 | 15513.02 | 17319.32  | -1.37207 | 1.8E-36  | -1.77949 | 7.48E-61 | -0.22901 | 0.208996 |
| AT3G08943 | AT3G08943 | 373.3158 | 249.7944  | 289.7222 | 206.2078 | 223.2515 | 250.207  | 180.5286 | 215.778  | 205.0117 | 242.7625 | 255.4241 | 242.4001  | -0.4325  | 0.015208 | -0.60042 | 0.000082 | -0.30538 | 0.281585 |
| AT3G08947 | AT3G08947 | 141.4796 | 112.4075  | 95.28642 | 59.38784 | 57.63465 | 74.76306 | 61.36194 | 66.89118 | 58.57476 | 118.9824 | 67.84071 | 80.80071  | -0.8445  | 0.000695 | -0.86704 | 0.000824 | -0.35904 | 0.404471 |
| AT3G08950 | HCC1      | 58.25629 | 53.52738  | 66.95803 | 113.4143 | 112.6194 | 133.5767 | 138.7313 | 101.4157 | 127.8882 | 58.53167 | 61.19536 | 84.94434  | 0.954699 | 2.85E-05 | 0.997751 | 1.84E-05 | 0.179113 | 0.723839 |
| AT3G08960 | AT3G08960 | 55.1613  | 319.38    | 293.5852 | 245.3873 | 215.9643 | 247.2165 | 281.1999 | 295.6158 | 194.273  | 328.6112 | 296.6645 | 335.6337  | -0.5784  | 0.005327 | -0.46006 | 0.037418 | -0.15009 | 0.719598 |
| AT3G08970 | ERDJ3A    | 19.02246 | 23.1952   | 30.9037  | 415.3025 | 433.9161 | 424.6542 | 323.7065 | 305.3259 | 254.8002 | 14.39303 | 27.93701 | 25.89766  | 3.943953 | 1.83E-65 | 3.423542 | 1.56E-48 | -0.13529 | 0.849275 |
| AT3G08980 | AT3G08980 | 14.26685 | 12.48972  | 21.89012 | 23.2921  | 17.22415 | 18.93997 | 24.9005  | 17.26224 | 28.31113 | 23.98839 | 30.59768 | 26.93357  | 0.263995 | 0.561019 | 0.46118  | 0.30634  | 0.637485 | 0.304667 |
| AT3G08990 | AT3G08990 | 285.5369 | 14.27397  | 39.91728 | 51.55195 | 51.00998 | 45.85468 | 31.12562 | 25.89336 | 47.83065 | 34.54328 | 21.28534 | 31.0772   | 0.748589 | 0.03274  | 0.276638 | 0.562277 | 0.042271 | 0.956566 |
| AT3G09000 | AT3G09000 | 146.2352 | 140.9554  | 153.2309 | 157.5427 | 119.9066 | 154.5103 | 147.6244 | 132.7035 | 103.4821 | 154.4852 | 155.6491 | 106.6984  | -0.02835 | 0.924222 | -0.19277 | 0.474807 | -0.08161 | 0.874312 |
| AT3G09010 | AT3G09010 | 58.25629 | 60.66437  | 48.93086 | 158.78   | 151.0425 | 156.504  | 154.7388 | 154.2813 | 119.102  | 38.38143 | 35.91902 | 55.89766  | 1.436466 | 8.3E-12  | 1.313015 | 1.25E-09 | -0.69695 | 0.053578 |
| AT3G09020 | AT3G09020 | 84.41218 | 121.3282  | 86.27284 | 348.0787 | 398.1428 | 408.7047 | 528.2463 | 455.2916 | 530.1116 | 42.21957 | 71.83803 | 85.98024  | 1.935138 | 1.27E-21 | 2.318363 | 9.93E-31 | -0.51353 | 0.154212 |
| AT3G09030 | AT3G09030 | 140.2907 | 164.1506  | 141.642  | 150.5371 | 135.8058 | 119.6209 | 135.1741 | 169.124  | 142.5019 | 110.3466 | 86.47171 | 102.5547  | -0.11242 | 0.619712 | -0.01219 | 0.946264 | -0.54401 | 0.039616 |
| AT3G09032 | AT3G09032 | 14.26685 | 1.784246  | 5.150617 | 14.02213 | 25.83622 | 14.95261 | 15.11816 | 18.34113 | 26.35864 | 6.716749 | 9.312338 | 7.251346  | 1.026994 | 0.040345 | 1.128825 | 0.029065 | 0.002247 | NA       |
| AT3G09035 | AT3G09035 | 211.6249 | 171.2876  | 199.5864 | 148.882  | 162.9669 | 170.4598 | 131.6169 | 183.4113 | 204.0354 | 160.2424 | 190.2378 | 164.7019  | -0.27739 | 0.188975 | -0.1718  | 0.476528 | -0.18325 | 0.625371 |
| AT3G09040 | PCMP-E88  | 24.96698 | 32.11643  | 32.19136 | 23.2901  | 15.89921 | 34.88943 | 30.23632 | 28.05114 | 14.64369 | 28.2928  | 25.27635 | 30.104129 | -0.25139 | 0.566886 | -0.25294 | 0.596058 | -0.14444 | 0.869018 |
| AT3G09050 | AT3G09050 | 480.3172 | 506.7259  | 504.7605 | 555.5238 | 582.3087 | 463.531  | 753.24   | 693.7262 | 873.7402 | 632.334  | 655.8546 | 681.6265  | 0.105704 | 0.530375 | 0.630268 | 4.43E-06 | 0.39634  | 0.037283 |
| AT3G09060 | AT3G09060 | 21.40027 | 19.62671  | 21.89012 | 14.84696 | 12.58688 | 27.91154 | 16.00746 | 23.73558 | 10.73871 | 14.39303 | 14.63367 | 18.64632  | -0.21056 | 0.676303 | -0.28958 | 0.538774 | -0.34892 | 0.675201 |
| AT3G09070 | AT3G09070 | 115.3237 | 62.44861  | 78.54691 | 89.08176 | 61.60946 | 57.81677 | 59.58333 | 81.99564 | 93.71962 | 76.76285 | 66.5167  | 83.90843  | -0.28052 | 0.379458 | -0.13577 | 0.717902 | -0.17641 | 0.768619 |
| AT3G09080 | AT3G09080 | 5.94452  | 10.70548  | 7.275926 | 6.186234 | 5.962205 | 7.974726 | 13.33955 | 5.39445  | 5.857476 | 10.55489 | 5.321336 | 14.50269  | -0.21508 | 0.745124 | 0.053718 | 0.943608 | 0.031752 | NA       |
| AT3G09085 | AT3G09085 | 34.8721  | 24.97944  | 36.05432 | 48.66504 | 60.28452 | 47.84836 | 45.35448 | 30.20892 | 92.74337 | 24.94793 | 39.91002 | 55.93895  | 0.624641 | 0.128394 | 0.717113 | 0.089776 | 0.281375 | 0.723696 |
| AT3G09090 | DEX1      | 536.1957 | 496.0204  | 467.4185 | 381.072  | 327.9    |          |          |          |          |          |          |           |          |          |          |          |          |          |

|           |           |          |          |          |           |          |          |          |          |          |          |          |           |   |          |           |          |          |          |          |
|-----------|-----------|----------|----------|----------|-----------|----------|----------|----------|----------|----------|----------|----------|-----------|---|----------|-----------|----------|----------|----------|----------|
| AT3G09590 | AT3G09590 | 2.377808 | 3.568492 | 2.575309 | 0.412416  | 0.662467 | 0        | 0        | 0        | 0        | 0        | 0        | 1.330334  | 0 | -1.03744 | 0.086834  | -1.27046 | 0.028782 | -0.99246 | NA       |
| AT3G09595 | AT3G09595 | 0        | 1.784246 | 0        | 0.412416  | 0        | 0        | 0        | 0        | 0        | 0        | 0        | 0         | 0 | -0.18187 | NA        | -0.25798 | NA       | 0.091448 | NA       |
| AT3G09600 | RVE8      | 160.502  | 187.3458 | 178.984  | 197.5471  | 179.5286 | 189.3997 | 83.59453 | 65.81229 | 41.97858 | 159.2829 | 148.9974 | 141.9192  | 0 | 0.109636 | 0.655177  | -1.40146 | 1.15E-11 | -0.25114 | 0.569665 |
| AT3G09620 | RH45      | 3.566712 | 3.568492 | 1.287654 | 1.237247  | 0.662467 | 0.996841 | 2.66791  | 1.07889  | 0.976246 | 2.878607 | 0        | 0.2071813 | 0 | -0.69483 | 0.320499  | -0.37787 | 0.636219 | -0.32062 | NA       |
| AT3G09630 | RPL4A     | 2591.811 | 2137.527 | 2101.452 | 1561.818  | 1701.878 | 1593.948 | 1330.398 | 1624.808 | 1870.487 | 1659.037 | 1728.104 | 1793.154  | 0 | -0.48555 | 0.000919  | -0.49518 | 0.000872 | -0.39406 | 0.050531 |
| AT3G09640 | APX2      | 0        | 0        | 0        | 0.824831  | 0        | 0        | 0        | 0        | 0.972646 | 0        | 0        | 0         | 0 | 0.985671 | NA        | 0.325206 | NA       | 0        | NA       |
| AT3G09650 | HCF152    | 363.8046 | 265.8527 | 238.2161 | 204.5581  | 167.6042 | 216.3144 | 263.2338 | 336.6137 | 262.6102 | 238.9244 | 219.5051 | 238.2585  | 0 | -0.55297 | 0.005135  | -0.01474 | 0.958279 | -0.11261 | 0.335661 |
| AT3G09660 | MC8M      | 42.80054 | 30.33218 | 38.62963 | 25.56977  | 23.18635 | 25.91786 | 31.12562 | 32.3667  | 14.64369 | 44.13864 | 39.91002 | 45.57989  | 0 | -0.45982 | 0.101271  | -0.49439 | 0.187617 | -0.39013 | 0.779682 |
| AT3G09670 | AT3G09670 | 152.1797 | 148.0924 | 132.6284 | 120.4253  | 102.02   | 126.5988 | 134.2848 | 155.3602 | 125.9357 | 136.2541 | 148.9974 | 147.0987  | 0 | -0.30677 | 0.112992  | -0.05914 | 0.817077 | -0.003   | 0.995624 |
| AT3G09680 | RPS2A     | 49.93397 | 53.27388 | 68.24568 | 58.1506   | 74.8588  | 76.75674 | 55.13682 | 60.41784 | 70.28971 | 60.45074 | 45.23135 | 41.43626  | 0 | 0.259938 | 0.378479  | 0.104908 | 0.77281  | -0.20631 | 0.708209 |
| AT3G09690 | AT3G09690 | 140.2907 | 103.4863 | 140.3543 | 110.5274  | 110.632  | 120.6177 | 97.82338 | 124.0723 | 85.90965 | 104.5894 | 107.7571 | 155.386   | 0 | -0.17745 | 0.500978  | -0.32291 | 0.217769 | -0.06875 | 0.889957 |
| AT3G09700 | TIM14-2   | 38.04493 | 51.74313 | 36.05432 | 97.74249  | 104.0074 | 79.74726 | 71.14428 | 65.81229 | 74.1947  | 47.97678 | 25.27635 | 51.79533  | 0 | 1.135372 | 1.55E-05  | 0.726485 | 0.012423 | 0.032707 | 0.967935 |
| AT3G09710 | IDQ1      | 66.57862 | 60.66437 | 68.24568 | 39.17948  | 48.36011 | 43.86099 | 32.90423 | 52.86561 | 27.33489 | 48.93632 | 67.84703 | 66.29802  | 0 | -0.55523 | 0.052579  | -0.76305 | 0.010728 | -0.10085 | 0.877948 |
| AT3G09720 | RH57      | 112.9459 | 94.56504 | 128.7654 | 122.8474  | 129.8436 | 147.5324 | 120.9453 | 152.1235 | 113.2445 | 106.5085 | 111.7481 | 103.5907  | 0 | 0.22295  | 0.317508  | 0.179935 | 0.469679 | -0.07475 | 0.87843  |
| AT3G09730 | AT3G09730 | 40.42273 | 28.54794 | 42.49259 | 40.00431  | 35.77323 | 38.87679 | 39.12935 | 36.68226 | 30.26363 | 36.46235 | 39.91002 | 35.22082  | 0 | 0.019782 | 0.960494  | -0.0877  | 0.832277 | -0.02498 | 0.976969 |
| AT3G09735 | S1FA3     | 114.1348 | 108.839  | 135.2037 | 360.8636  | 349.7827 | 235.2544 | 185.8644 | 149.9657 | 388.5459 | 90.19635 | 89.13238 | 164.7091  | 0 | 1.297504 | 0.50E-05  | 0.93623  | 0.005748 | -0.05411 | 0.951963 |
| AT3G09740 | SYPT1     | 684.8087 | 717.2669 | 821.5235 | 906.4894  | 1008.938 | 818.4063 | 821.7164 | 759.5385 | 913.7663 | 745.5592 | 863.3867 | 787.289   | 0 | 0.295323 | 0.042127  | 0.163916 | 0.323718 | 0.104508 | 0.714095 |
| AT3G09750 | AT3G09750 | 0        | 0        | 0        | 1.237247  | 0        | 0        | 0        | 0        | 0        | 0        | 0        | 0         | 0 | 0.221999 | NA        | 0        | NA       | 0        | NA       |
| AT3G09760 | AT3G09760 | 246.1031 | 199.8356 | 194.4358 | 167.4407  | 139.7806 | 173.4503 | 197.4254 | 169.3857 | 147.4131 | 179.4332 | 176.9344 | 157.4578  | 0 | -0.41143 | 0.028953  | -0.31204 | 0.13101  | -0.3158  | 0.29285  |
| AT3G09770 | LOG2      | 359.049  | 303.3218 | 275.558  | 233.8396  | 221.2641 | 238.2449 | 214.3221 | 263.2491 | 277.2539 | 327.2016 | 321.9408 | 311.8079  | 0 | -0.43261 | 0.006792  | -0.31315 | 0.072589 | 0.031757 | 0.938392 |
| AT3G09780 | CCR1      | 32.10041 | 21.41095 | 32.19136 | 9.485558  | 6.624673 | 12.95893 | 11.56005 | 12.94668 | 13.66744 | 29.7456  | 38.57969 | 40.40035  | 0 | -1.45221 | 0.801E-05 | -1.06539 | 0.007094 | 0.300299 | 0.658697 |
| AT3G09790 | UBQ8      | 5.94452  | 21.41095 | 9.31358  | 30.939117 | 25.17376 | 24.92102 | 12.42505 | 17.26224 | 6.833722 | 13.4335  | 5.321336 | 11.39497  | 0 | 1.081737 | 0.018088  | 0.056274 | 0.93424  | -0.12975 | NA       |
| AT3G09800 | AT3G09800 | 96.30122 | 126.6815 | 149.3679 | 105.9908  | 120.569  | 103.6714 | 114.7201 | 94.94231 | 102.5058 | 147.7685 | 178.2648 | 154.3501  | 0 | -0.16288 | 0.500005  | -0.23937 | 0.335246 | 0.357911 | 0.274581 |
| AT3G09810 | IDH6      | 205.6804 | 201.6198 | 203.4494 | 292.4026  | 272.274  | 310.0175 | 262.3445 | 213.6202 | 206.9642 | 144.8899 | 121.0604 | 188.535   | 0 | 0.505569 | 0.005601  | 0.159072 | 0.484434 | -0.16918 | 0.148892 |
| AT3G09820 | ADK1      | 1695.377 | 1409.554 | 1582.527 | 907.3143  | 880.419  | 892.1725 | 775.4726 | 876.0586 | 841.524  | 1707.973 | 1823.888 | 1598.404  | 0 | -0.80159 | 9.17E-14  | -0.90585 | 6.23E-17 | -0.42030 | 0.545129 |
| AT3G09830 | AT3G09830 | 154.5575 | 226.5992 | 217.6136 | 400.4555  | 387.5434 | 424.6542 | 329.0423 | 383.0059 | 407.0946 | 118.9824 | 147.6671 | 109.8601  | 0 | 1.005399 | 4.59E-09  | 0.891527 | 3.95E-07 | -0.65026 | 0.007429 |
| AT3G09840 | CD48A     | 3886.527 | 3209.859 | 2621.664 | 2863.814  | 2892.322 | 3356.363 | 310.728  | 3845.164 | 3306.545 | 2639.683 | 2902.789 | 2451.734  | 0 | -0.09186 | 0.651606  | -0.07571 | 0.73103  | -0.28358 | 0.281545 |
| AT3G09850 | AT3G09850 | 721.6647 | 611.9964 | 520.2124 | 375.7106  | 327.9213 | 400.73   | 401.0759 | 554.5494 | 437.3582 | 545.0162 | 591.9986 | 529.3482  | 0 | -0.73515 | 1.21E-05  | -0.40686 | 0.02672  | -0.15262 | 0.646818 |
| AT3G09860 | AT3G09860 | 569.485  | 581.6642 | 706.9222 | 948.1434  | 1006.95  | 822.3936 | 773.694  | 644.0973 | 1181.258 | 527.3268 | 703.7467 | 838.0484  | 0 | 0.563023 | 0.008273  | 0.469412 | 0.036874 | 0.279327 | 0.446596 |
| AT3G09863 | AT3G09863 | 5.94452  | 1.784246 | 7.725926 | 13.1973   | 13.24935 | 9.968408 | 8.003731 | 4.31556  | 14.64369 | 6.762825 | 13.30334 | 11.39497  | 0 | 0.90265  | 0.095988  | 0.529305 | 0.404113 | 0.718594 | NA       |
| AT3G09870 | AT3G09870 | 0        | 1.784246 | 0        | 0.860727  | 10.59948 | 7.974726 | 16.00746 | 11.86779 | 26.35864 | 1.919071 | 5.321336 | 7.251642  | 0 | 1.851485 | 0.001141  | 2.688656 | 1.04E-06 | 1.128454 | NA       |
| AT3G09880 | B'BETA    | 234.2141 | 212.3253 | 226.6272 | 185.1746  | 174.2289 | 206.346  | 224.1045 | 213.6202 | 199.1542 | 202.462  | 218.1748 | 219.6122  | 0 | -0.25826 | 0.107407  | -0.08208 | 0.681985 | -0.07705 | 0.822513 |
| AT3G09890 | AT3G09890 | 67.76752 | 90.99655 | 77.25926 | 109.7025  | 114.6068 | 109.6525 | 72.03358 | 87.39009 | 43.5082  | 52.77446 | 57.20436 | 71.47755  | 0 | 0.488988 | 0.080275  | 0.351773 | 0.257887 | -0.34786 | 0.481893 |
| AT3G09900 | RABE1E    | 357.8601 | 403.2396 | 436.5148 | 594.7033  | 591.5833 | 553.2466 | 616.2873 | 534.0505 | 614.0587 | 365.831  | 404.4215 | 418.5062  | 0 | 0.535689 | 4.07E-05  | 0.553689 | 3.92E-05 | -0.01082 | 0.978400 |
| AT3G09910 | RAB2CB    | 43.98945 | 26.76369 | 43.78025 | 49.07745  | 66.24673 | 46.85152 | 56.02612 | 44.23449 | 67.36097 | 47.01725 | 54.54369 | 43.50807  | 0 | 0.447041 | 0.151446  | 0.492487 | 0.133366 | 0.284308 | 0.615915 |
| AT3G09915 | AT3G09915 | 0        | 0        | 0        | 0         | 0        | 0        | 0        | 0        | 0        | 0        | 0        | 0         | 0 | #N/A     | #N/A      | #N/A     | #N/A     | #N/A     | #N/A     |
| AT3G09920 | PIP5K9    | 500.5286 | 444.2773 | 419.7753 | 284.5667  | 288.8357 | 306.0301 | 300.5846 | 318.2725 | 262.6102 | 366.5426 | 311.2981 | 400.8958  | 0 | -0.62897 | 1.33E-05  | -0.62341 | 2.7E-05  | -0.33182 | 0.134038 |
| AT3G09922 | IP51      | 2.377808 | 0        | 0        | 0.412416  | 0        | 0        | 1.778607 | 2.15778  | 1.952492 | 0        | 0        | 0         | 0 | -0.44622 | 0.490915  | 0.446801 | 0.514475 | -0.07179 | NA       |
| AT3G09925 | AT3G09925 | 0        | 1.784246 | 0        | 0.412416  | 0        | 0        | 0        | 0        | 0        | 0        | 0        | 0         | 0 | -0.15186 | NA        | -0.24242 | NA       | -0.23806 | NA       |
| AT3G09930 | AT3G09930 | 0        | 1.784246 | 0        | 0         | 0        | 0        | 0.889303 | 0        | 0        | 0        | 0        | 0         | 0 | -0.26522 | NA        | -0.08117 | NA       | -0.24296 | NA       |
| AT3G09940 | MDHAR     | 21.40027 | 26.76369 | 20.60247 | 273.4315  | 210.0021 | 261.1723 | 117.3881 | 111.1257 | 122.0307 | 6.716749 | 7.982004 | 8.287252  | 0 | 3.314213 | 2.22E-40  | 2.243763 | 6.57E-18 | -1.27697 | 0.006083 |
| AT3G09950 | AT3G09950 | 0        | 0        | 0        | 1.237247  | 1.987402 | 0        | 0.889303 | 0        | 0.976246 | 0        | 0        | 0         | 0 | 0.585069 | NA        | 0.316377 | NA       | 0        | NA       |
| AT3G09960 | AT3G09960 | 1.188904 | 0        | 2.575309 | 29.69392  | 35.11077 | 20.9366  | 15.11816 | 11.86779 | 9.76246  | 0        | 0        | 0         | 0 | 3.101992 | 1.42E-09  | 1.957654 | 0.000428 | -0.50022 | NA       |
| AT3G09970 | AT3G09970 | 167.6355 | 192.6986 | 153.2309 | 262.2963  | 315.9969 | 251.2039 | 313.0348 | 276.1958 | 386.5934 | 184.2308 | 174.2738 | 205.1095  | 0 | 0.683652 | 0.000019  | 0.912578 | 4.44E-07 | 0.139107 | 0.722359 |
| AT3G09975 | AT3G09975 | 0        | 0        | 0        | 0         | 0        | 0        | 0        | 0        | 0        | 0        | 0        | 0         | 0 | #N/A     | #N/A      | #N/A     | #N/A     | #N/A     | #N/A     |
| AT3G09980 | AT3G09980 | 693.131  | 683.3662 | 715.9358 | 866.8975  | 900.9555 | 756.6022 | 617.1766 | 649.4917 | 1139.279 | 691.8252 | 735.6747 | 757.2477  | 0 | 0.263462 | 0.259935  | 0.195176 | 0.447777 | 0.05998  | 0.90649  |
| AT3G09990 | ENT2      | 0        | 0        | 0        | 0.662467  | 0        | 0        | 0        | 0        | 0        | 0        | 0        | 0         | 0 | 0.128567 | 0         | 0        | NA       | 0        | NA       |
| AT3G10000 | EDA31     | 10.70014 | 12.48972 | 6.438272 | 15.67179  | 14.57428 | 18.93997 | 8.893035 | 10.7889  | 11.71495 | 11.51443 | 14.63367 | 15.5386   | 0 | 0.635256 | 0.180471  | 0.075713 | 0.90839  | 0.42393  | NA       |
| AT3G10010 | DML2      | 248.4809 | 237.3047 | 211.1753 | 246.2121  | 217.9517 | 307.027  | 245.4478 | 289.1425 | 197.2017 | 165.0401 | 172.9434 | 156.4219  | 0 | 0.136626 | 0.550812  | 0.067461 | 0.801429 | -0.48356 | 0.085619 |
| AT3G10015 | AT3G10015 | 0        | 0        | 0        | 0         | 0        | 0        | 0        | 0        | 0        | 0        | 0        | 0         | 0 | #N/A     | #N/A      | #N/A     | #N/A     | #N/A     | #N/A     |
| AT3G10020 | AT3G10020 | 420.872  | 465.6882 | 368.2691 | 433.4488  | 408.0798 | 418.6731 | 384.1791 | 546.9972 | 1039.702 | 422.1957 | 379.1452 | 356.3518  | 0 | 0.007055 | 0.985641  | 0.619576 | 0.033172 | -0.10875 | 0.865138 |
| AT3G10030 | AT3G10030 | 235      |          |          |           |          |          |          |          |          |          |          |           |   |          |           |          |          |          |          |

|           |           |           |          |          |          |          |          |          |          |          |          |          |           |          |          |          |          |          |          |
|-----------|-----------|-----------|----------|----------|----------|----------|----------|----------|----------|----------|----------|----------|-----------|----------|----------|----------|----------|----------|----------|
| AT3G10480 | ANAC050   | 354.2934  | 328.3013 | 359.2556 | 350.5532 | 336.5334 | 375.809  | 429.5336 | 427.2404 | 385.6172 | 348.3114 | 375.1542 | 335.6337  | 0.021614 | 0.90291  | 0.24777  | 0.082569 | 0.017329 | 0.96169  |
| AT3G10490 | ANAC052   | 288.9037  | 244.4417 | 251.0926 | 292.8151 | 289.4982 | 293.0712 | 330.8209 | 330.1403 | 223.5603 | 248.5197 | 321.9408 | 229.9712  | 0.151146 | 0.506625 | 0.165634 | 0.487933 | 0.020022 | 0.970941 |
| AT3G10500 | NAC053    | 90.3567   | 137.3869 | 115.8889 | 379.8347 | 392.8431 | 417.6763 | 473.1095 | 445.5815 | 408.0708 | 94.99403 | 129.0424 | 118.0933  | 1.76994  | 1.8E-26  | 1.926209 | 6.32E-31 | 0.000814 | 0.998413 |
| AT3G10510 | AT3G10510 | 1.188904  | 0        | 0        | 0.412416 | 0        | 0        | 0.996841 | 0        | 0        | 0        | 1.330334 | 1.035907  | 0.008297 | NA       | -0.27113 | NA       | 0.169205 | NA       |
| AT3G10520 | AHB2      | 928.534   | 1222.209 | 1068.753 | 939.0703 | 881.0815 | 863.264  | 828.8308 | 771.4063 | 1023.106 | 975.8477 | 1065.598 | 1018.2192 | -0.25521 | 0.105011 | -0.28807 | 0.074649 | -0.07071 | 0.836113 |
| AT3G10525 | SMR1      | 194.9802  | 173.0719 | 162.2444 | 197.9595 | 199.4026 | 168.2464 | 144.0672 | 141.3346 | 210.8691 | 327.9648 | 300.6555 | 208.2976  | 0.093277 | 0.726699 | -0.09467 | 0.742204 | 0.47315  | 0.124985 |
| AT3G10526 | AT3G10526 | 0         | 0        | 0        | 0        | 0        | 0        | 0        | 0        | 0        | 0        | 0        | 0         | #N/A     | #N/A     | #N/A     | #N/A     | #N/A     | #N/A     |
| AT3G10530 | AT3G10530 | 156.9533  | 142.7397 | 162.2444 | 144.3455 | 111.957  | 171.4566 | 136.9527 | 125.1512 | 112.2683 | 160.2424 | 123.7211 | 123.2729  | -0.11944 | 0.637488 | -0.29684 | 0.221373 | -0.17514 | 0.675176 |
| AT3G10540 | PDPK2     | 235.403   | 230.1677 | 233.0654 | 199.6091 | 215.9643 | 227.2797 | 192.0896 | 214.6991 | 181.5818 | 210.1383 | 246.1118 | 224.7917  | -0.12601 | 0.476543 | -0.24679 | 0.157083 | -0.04158 | 0.913327 |
| AT3G10550 | MTM1      | 192.6024  | 176.6404 | 154.5185 | 120.4253 | 100.695  | 113.6398 | 133.3955 | 170.4646 | 115.197  | 172.7164 | 145.0064 | 164.7091  | -0.62689 | 0.001322 | -0.31765 | 0.152862 | -0.11158 | 0.792148 |
| AT3G10560 | UNE9      | 1.188904  | 1.784246 | 0        | 1.237247 | 0        | 0        | 1.778607 | 1.07889  | 0        | 0        | 0.995936 | 0         | -0.23527 | NA       | 0.020372 | NA       | -0.1049  | NA       |
| AT3G10570 | CYP77A6   | 66.57862  | 87.42806 | 61.80741 | 40.82914 | 47.03518 | 42.86415 | 39.12935 | 42.07671 | 59.55101 | 102.6703 | 106.4267 | 89.08796  | -0.68056 | 0.007039 | -0.57294 | 0.037075 | 0.466289 | 0.215684 |
| AT3G10572 | AT3G10572 | 194.9802  | 183.7773 | 190.5728 | 211.1568 | 229.2137 | 231.2671 | 255.2301 | 203.9102 | 208.9166 | 207.2597 | 256.7545 | 231.0072  | 0.227482 | 0.203436 | 0.226865 | 0.23545  | 0.274696 | 0.309787 |
| AT3G10575 | AT3G10575 | 0         | 1.784246 | 0        | 2.062078 | 1.987402 | 0.996841 | 1.778607 | 2.15778  | 2.928738 | 1.919071 | 0        | 0         | 0.545008 | 0.439875 | 0.725222 | 0.302667 | 0.22973  | NA       |
| AT3G10580 | AT3G10580 | 0         | 1.784246 | 1.287654 | 0        | 0        | 0        | 0        | 0.889303 | 0        | 0        | 0        | 0         | -0.52682 | NA       | -0.29362 | NA       | -0.48177 | NA       |
| AT3G10585 | AT3G10585 | 0         | 0        | 0        | 0        | 0        | 0        | 0        | 0        | 0        | 0        | 0        | 0         | #N/A     | #N/A     | #N/A     | #N/A     | #N/A     | #N/A     |
| AT3G10590 | AT3G10590 | 1.188904  | 0        | 1.287654 | 0        | 15.67179 | 5.299738 | 11.96209 | 10.67164 | 4.31556  | 12.6912  | 2.878607 | 0         | 1.950602 | 0.000913 | 1.720993 | 0.005044 | 0.227882 | NA       |
| AT3G10595 | AT3G10595 | 2.377808  | 0        | 0        | 1.649662 | 2.649869 | 1.993682 | 0.889303 | 0        | 1.952492 | 0        | 0        | 0         | 0.534403 | 0.426123 | 0.0397   | 0.961439 | -0.46969 | NA       |
| AT3G10600 | CAT7      | 10.70014  | 1.784246 | 9.01358  | 2.886909 | 3.312336 | 6.977885 | 5.335821 | 7.55223  | 3.904984 | 6.716749 | 1.330334 | 7.251346  | -0.60587 | 0.346764 | -0.30263 | 0.68557  | -0.35446 | NA       |
| AT3G10610 | RPS17C    | 236.5919  | 249.7944 | 300.0235 | 274.2564 | 309.3722 | 237.2481 | 219.658  | 190.9635 | 276.2776 | 281.1439 | 288.6825 | 316.9874  | 0.063501 | 0.788755 | -0.1905  | 0.395743 | 0.168746 | 0.632355 |
| AT3G10620 | NUDT26    | 98.67903  | 110.6233 | 117.7838 | 96.09283 | 156.3423 | 114.3672 | 109.3843 | 85.23231 | 191.3442 | 144.8899 | 163.6311 | 162.6733  | 0.184951 | 0.585789 | 0.258141 | 0.45532  | 0.528501 | 0.226969 |
| AT3G10630 | AT3G10630 | 128.4016  | 121.3287 | 132.6284 | 105.166  | 115.9318 | 107.6588 | 96.93408 | 118.6779 | 114.2208 | 112.2657 | 129.0424 | 136.7397  | -0.21823 | 0.290377 | -0.21555 | 0.338486 | -0.02224 | 0.96566  |
| AT3G10640 | VPS60.1   | 230.6474  | 231.952  | 280.7086 | 435.9233 | 504.8001 | 496.4267 | 492.6741 | 475.7905 | 587.7001 | 289.7798 | 356.5295 | 250.6894  | 0.927446 | 2.08E-08 | 1.042394 | 2.89E-10 | 0.257305 | 0.39226  |
| AT3G10650 | NUP1      | 599.2076  | 483.5307 | 385.0086 | 264.3584 | 222.589  | 278.1186 | 305.9204 | 349.5603 | 234.299  | 344.4733 | 420.3855 | 358.4237  | -0.91668 | 2.96E-06 | -0.70418 | 0.000575 | -0.37849 | 0.231806 |
| AT3G10660 | CPK2      | 28.53369  | 41.03766 | 34.76667 | 21.03319 | 19.87402 | 24.92102 | 22.65669 | 21.47741 | 23.98839 | 41.24035 | 32.1131  | 0         | -0.61275 | 0.075696 | -0.47614 | 0.216824 | -0.0927  | 0.908744 |
| AT3G10670 | ABC16     | 43.85455  | 594.1539 | 499.6099 | 435.5108 | 451.1402 | 433.6257 | 450.8769 | 445.5815 | 518.3866 | 543.0972 | 505.5269 | 570.7845  | -0.20626 | 0.183867 | -0.10772 | 0.594446 | 0.085788 | 0.778754 |
| AT3G10680 | AT3G10680 | 15.45575  | 10.70548 | 12.87654 | 6.98649  | 7.949607 | 5.981045 | 6.225124 | 4.31556  | 5.874676 | 6.835821 | 9.312338 | 11.39497  | -0.77697 | 0.122451 | -1.00993 | 0.059239 | -0.35642 | NA       |
| AT3G10690 | GYRA      | 373.3158  | 326.517  | 375.9951 | 280.855  | 289.4982 | 267.1533 | 279.2413 | 283.7481 | 279.2064 | 310.8895 | 348.5475 | 340.8132  | -0.3602  | 0.006385 | -0.35497 | 0.010722 | -0.112   | 0.666695 |
| AT3G10700 | GALAK     | 105.8125  | 114.1917 | 105.5877 | 99.3215  | 98.7062  | 87.72199 | 72.92289 | 73.36452 | 96.64835 | 102.6703 | 118.3997 | 85.98024  | -0.17055 | 0.483726 | -0.40534 | 0.085632 | -0.0852  | 0.863892 |
| AT3G10710 | PME24     | 0         | 1.784246 | 0        | 0        | 0        | 0        | 0        | 0        | 0        | 0        | 0        | 0         | -0.2184  | NA       | -0.20558 | NA       | -0.19918 | NA       |
| AT3G10720 | PME25     | 526.6844  | 446.0615 | 366.9815 | 300.2385 | 280.8861 | 311.0143 | 216.1007 | 249.2236 | 192.3205 | 324.323  | 388.4575 | 325.2744  | -0.57738 | 0.000649 | -1.00835 | 1.61E-09 | -0.36503 | 0.1573   |
| AT3G10730 | SUN2      | 161.6909  | 146.3082 | 151.9432 | 146.8199 | 122.5564 | 133.5767 | 119.1667 | 143.4924 | 131.7932 | 119.942  | 117.0694 | 107.7343  | -0.18449 | 0.355208 | -0.22405 | 0.28717  | -0.4108  | 0.13037  |
| AT3G10740 | ASD1      | 724.0245  | 868.9278 | 781.6062 | 718.8403 | 684.9912 | 721.7127 | 674.9813 | 766.0119 | 572.7246 | 744.5996 | 689.113  | 742.745   | -0.15507 | 0.367879 | -0.26502 | 0.115626 | -0.12051 | 0.688768 |
| AT3G10745 | MIR158A   | 0         | 0        | 0        | 1.237247 | 1.324935 | 0        | 0.889303 | 2.15778  | 0.976264 | 0        | 0        | 0         | 0.507687 | NA       | 0.662533 | NA       | 0        | NA       |
| AT3G10750 | AT3G10750 | 0         | 0        | 1.287654 | 2.062078 | 1.324935 | 1.993682 | 0        | 0        | 0.976246 | 1.919071 | 0        | 0         | 0.61802  | NA       | -0.09845 | NA       | 0.100984 | NA       |
| AT3G10760 | AT3G10760 | 104.91275 | 394.3184 | 379.858  | 240.4383 | 278.8987 | 277.1217 | 253.4515 | 208.2258 | 216.7266 | 324.323  | 339.2352 | 329.4183  | -0.57772 | 2.33E-05 | -0.79612 | 9.48E-09 | -0.2583  | 0.248955 |
| AT3G10770 | AT3G10770 | 590.8853  | 717.2669 | 620.6494 | 607.9006 | 561.1098 | 602.0918 | 613.6194 | 620.3617 | 511.5529 | 540.2186 | 570.7133 | 556.2818  | -0.11697 | 0.443512 | -0.138   | 0.38431  | -0.20413 | 0.351437 |
| AT3G10780 | AT3G10780 | 0         | 0        | 0        | 0.412416 | 0        | 0        | 0        | 2.15778  | 1.952492 | 0        | 0        | 0         | 0.048538 | NA       | 0.635901 | NA       | 0        | NA       |
| AT3G10790 | AT3G10790 | 0         | 0        | 0        | 0        | 0.662467 | 1.993682 | 0        | 0        | 1.07889  | 0        | 0        | 0         | 0.405021 | NA       | 0.163361 | NA       | 0        | NA       |
| AT3G10800 | B2P28     | 248.4809  | 208.7568 | 207.3123 | 261.591  | 276.9113 | 331.948  | 289.129  | 330.1403 | 293.85   | 214.936  | 194.2288 | 184.3914  | 0.368452 | 0.028813 | 0.445473 | 0.009264 | -0.16311 | 0.612518 |
| AT3G10810 | AT3G10810 | 292.4704  | 233.7362 | 215.0383 | 163.729  | 153.6924 | 205.3492 | 178.75   | 188.8057 | 105.4346 | 212.0574 | 278.0398 | 195.7863  | -0.4926  | 0.066226 | -0.62576 | 0.012644 | -0.11381 | 0.834254 |
| AT3G10815 | AT3G10815 | 3.566712  | 0        | 6.438272 | 37.52982 | 43.06037 | 45.85468 | 58.69403 | 55.02339 | 50.76479 | 1.919071 | 0        | 0         | 2.86417  | 1.12E-11 | 3.231032 | 1.48E-14 | -0.44397 | 0.677954 |
| AT3G10820 | MED26A    | 60.6341   | 110.6233 | 79.83457 | 98.56732 | 96.72022 | 108.5566 | 100.4913 | 86.3112  | 107.3871 | 97.87263 | 94.45371 | 69.4074   | 0.285903 | 0.279173 | 0.246697 | 0.395572 | 0.080242 | 0.890145 |
| AT3G10840 | AT3G10840 | 161.6909  | 178.4246 | 159.6691 | 103.1039 | 107.9822 | 93.70303 | 146.7351 | 161.8335 | 155.2313 | 191.1383 | 207.5321 | 190.6068  | -0.68749 | 2.29E-05 | -0.10171 | 0.636508 | 0.284484 | 0.277425 |
| AT3G10845 | AT3G10845 | 0         | 0        | 0        | 0.412416 | 0.662467 | 0.996841 | 1.778607 | 0        | 1.952492 | 0        | 0        | 0         | 0.341954 | NA       | 0.637208 | NA       | 0.193222 | NA       |
| AT3G10850 | GLX2-2    | 1042.669  | 1161.544 | 1277.353 | 1568.004 | 1414.368 | 1347.729 | 1172.991 | 1329.192 | 1713.312 | 1376.934 | 1364.923 | 1156.072  | 0.310208 | 0.073892 | 0.271058 | 0.141399 | 1.60002  | 0.60531  |
| AT3G10860 | AT3G10860 | 363.8046  | 331.8698 | 339.9407 | 537.3775 | 622.7192 | 366.8374 | 343.2711 | 249.2236 | 814.1892 | 426.9934 | 468.2776 | 481.6965  | 0.492567 | 0.275821 | 0.387586 | 0.430255 | 0.360173 | 0.642572 |
| AT3G10870 | MES17     | 85.60108  | 62.44861 | 92.71111 | 72.99576 | 60.94699 | 53.8294  | 75.5908  | 46.39227 | 68.33722 | 97.87263 | 98.44471 | 98.41112  | -0.34126 | 0.20234  | -0.33195 | 0.25325  | 0.266047 | 0.555284 |
| AT3G10880 | AT3G10880 | 26.15589  | 24.79844 | 29.61605 | 31.34358 | 33.12336 | 29.90522 | 28.45727 | 12.94668 | 32.21612 | 37.42189 | 33.25835 | 40.40035  | 0.204392 | 0.613502 | -0.11571 | 0.810746 | 0.424256 | 0.808873 |
| AT3G10890 | MAN3      | 1.188904  | 1.784246 | 0        | 0.824831 | 0        | 0        | 0        | 3.557214 | 0        | 0        | 0        | 0         | -0.27722 | NA       | 0.122361 | NA       | -0.41165 | NA       |
| AT3G10900 | MAN4      | 0         | 0        | 0        | 0        | 0        | 0        | 0        | 0        | 0        | 0        | 0        | 0         | #N/A     | #N/A     | #N/A     | #N/A     | #N/A     | #N/A     |
| AT3G10910 | ATL72     | 0         | 0        | 0        | 0        | 0        | 0        | 0        | 0        | 0        | 0        | 0        | 0         | #N/A     | #N/A     | #N/A     | #N/A     | #N/A     | #N/A     |
| AT3G10912 | CPuORF63  | 0         | 0        | 0        | 0        | 0        | 0        | 0        | 0        | 0        | 0        | 0        | 0         | #N/A     | #N/A     | #N/A     | #N/A     | #N/A     | #N/A     |
| AT3G10915 | RTL816    | 178.3356  | 183.7773 | 194.4358 | 322.9214 | 316.6594 | 256.1881 | 250.7836 | 243.8291 | 217.7029 | 1        |          |           |          |          |          |          |          |          |

|           |           |          |          |          |          |          |          |          |          |          |          |          |          |          |          |           |           |          |          |
|-----------|-----------|----------|----------|----------|----------|----------|----------|----------|----------|----------|----------|----------|----------|----------|----------|-----------|-----------|----------|----------|
| AT3G11390 | AT3G11390 | 5.94452  | 3.568492 | 1.287654 | 0.824831 | 0.662467 | 0        | 0.889303 | 0        | 0.976246 | 3.838143 | 7.982004 | 2.071813 | -1.19482 | 0.067766 | -1.05348  | 0.125353  | 0.232739 | NA       |
| AT3G11395 | AT3G11395 | 0        | 0        | 0        | 0.412416 | 0        | 0.996841 | 0        | 0        | 0        | 0        | 0        | 0        | 0.224618 | NA       | 0         | NA        | 0        | NA       |
| AT3G11397 | PR1A13    | 2.377808 | 1.784246 | 2.575309 | 3.711714 | 1.987402 | 2.990522 | 2.66791  | 2.15778  | 2.928738 | 5.757214 | 3.991002 | 3.10772  | 0.19096  | 0.810115 | 0.081194  | 0.927273  | 0.547005 | NA       |
| AT3G11400 | EIF3G1    | 710.9646 | 849.3011 | 815.0852 | 972.8883 | 913.5424 | 843.3273 | 678.5386 | 774.643  | 1005.533 | 804.0909 | 907.2878 | 719.955  | 0.199773 | 0.291181 | 0.050026  | 0.833236  | 0.033292 | 0.939955 |
| AT3G11402 | PR1A13    | 19.02246 | 21.41095 | 14.1642  | 46.60296 | 59.62205 | 44.85784 | 12.45025 | 15.10446 | 8.786214 | 13.4335  | 11.97301 | 16.5745  | 1.391621 | 5.24E-05 | -0.50755  | 0.27449   | -0.31118 | 0.694808 |
| AT3G11405 | AT3G11405 | 0        | 0        | 0        | 0        | 0        | 0        | 0.996841 | 0        | 0        | 0        | 0        | 0        | 0.15625  | NA       | 0         | NA        | 0        | NA       |
| AT3G11410 | PP2CA     | 754.954  | 801.1265 | 763.579  | 485.4131 | 507.4499 | 572.1866 | 566.4663 | 681.8584 | 645.2986 | 782.9811 | 924.5821 | 683.6983 | -0.56231 | 0.000695 | -0.2886   | 0.072377  | 0.042015 | 0.905938 |
| AT3G11415 | AT3G11415 | 2.377808 | 5.352738 | 1.510617 | 5.962205 | 1.993682 | 5.446617 | 6.47334  | 5.854746 | 6.716749 | 6.65167  | 6.25439  | 6.154539 | -0.24811 | 0.730612 | 0.280609  | 0.715715  | 0.449891 | NA       |
| AT3G11420 | AT3G11420 | 170.0133 | 107.0548 | 130.0531 | 109.2901 | 102.6824 | 106.662  | 79.14801 | 90.62675 | 123.9832 | 133.3755 | 113.0784 | 105.6625 | -0.35303 | 0.147738 | -0.46808  | 0.061977  | -0.21204 | 0.627648 |
| AT3G11430 | GPAT5     | 1.188904 | 1.784246 | 0        | 17.73387 | 15.89921 | 18.93997 | 15.11816 | 4.31556  | 6.833722 | 2.878607 | 0        | 1.035907 | 2.544865 | 4.51E-06 | 1.692982  | 0.004869  | 0.086829 | NA       |
| AT3G11435 | MIR172C   | 0        | 0        | 0        | 0        | 0        | 0        | 0        | 0        | 0        | 0        | 0        | 0        | #N/A     | #N/A     | #N/A      | #N/A      | #N/A     | #N/A     |
| AT3G11440 | ATMYB65   | 52.31177 | 35.68492 | 50.21852 | 44.9533  | 35.77323 | 46.85152 | 36.46144 | 38.84004 | 35.14486 | 32.62421 | 34.58868 | 42.47217 | -0.13117 | 0.70555  | -0.32682  | 0.338936  | -0.33303 | 0.529593 |
| AT3G11450 | AT3G11450 | 1153.237 | 977.7668 | 848.5642 | 715.541  | 816.1597 | 737.6622 | 755.0187 | 844.7708 | 1388.222 | 767.6285 | 854.0744 | 831.8329 | -0.38141 | 0.092401 | -0.003543 | 0.990666  | -0.27242 | 0.469967 |
| AT3G11460 | PCMP-H52  | 17.83356 | 16.05821 | 10.30123 | 17.73387 | 15.89921 | 23.92418 | 19.56468 | 38.84004 | 19.52492 | 15.35257 | 18.62468 | 18.64632 | 0.306228 | 0.528506 | 0.708891  | 0.119688  | 0.208944 | 0.826737 |
| AT3G11470 | AT3G11470 | 85.60108 | 71.36984 | 70.82099 | 75.05963 | 68.8966  | 67.78517 | 74.70149 | 55.02339 | 83.95716 | 59.49121 | 89.13238 | 126.3806 | -0.10094 | 0.779082 | -0.08864  | 0.820588  | 0.251081 | 0.63962  |
| AT3G11480 | BSMT1     | 4.755616 | 0        | 3.862963 | 5.361402 | 11.26194 | 19.93682 | 18.67537 | 9.710009 | 7.809968 | 2.878607 | 5.321336 | 5.179533 | 1.277835 | 0.028255 | 1.31336   | 0.029571  | 0.250285 | NA       |
| AT3G11490 | ROPGAP4   | 253.2365 | 246.226  | 243.3667 | 106.4032 | 98.70762 | 110.6493 | 107.6057 | 127.309  | 130.817  | 223.5718 | 219.5051 | 223.7558 | -1.21791 | 1.17E-16 | -1.00889  | 0.457E-11 | -0.15291 | 0.595754 |
| AT3G11500 | AT3G11500 | 184.2801 | 190.9143 | 213.7560 | 296.9392 | 354.42   | 240.2386 | 173.4142 | 201.7524 | 380.7359 | 254.2769 | 290.0128 | 250.6894 | 0.572006 | 0.035446 | 0.341632  | 0.264339  | 0.410052 | 0.344724 |
| AT3G11505 | AT3G11505 | 0        | 0        | 0        | 0        | 0        | 0        | 0        | 0        | 0        | 0        | 0        | 0        | #N/A     | #N/A     | #N/A      | #N/A      | #N/A     | #N/A     |
| AT3G11510 | RP514B    | 1879.657 | 1802.088 | 1922.468 | 2101.67  | 2272.263 | 1763.411 | 1381.088 | 1392.847 | 2557.765 | 1826.956 | 1883.753 | 2032.449 | 0.127291 | 0.63116  | -0.0698   | 0.816557  | 0.034074 | 0.953343 |
| AT3G11520 | CYCB1-3   | 58.25629 | 48.17464 | 65.67037 | 61.44992 | 51.67245 | 72.76938 | 53.35811 | 51.78672 | 44.90732 | 78.86192 | 87.80204 | 72.51346 | 0.080018 | 0.80239  | -0.20244  | 0.52624   | 0.369993 | 0.629954 |
| AT3G11530 | AT3G11530 | 109.3792 | 124.8972 | 124.9025 | 178.9884 | 169.5916 | 141.5514 | 121.9451 | 120.8357 | 222.5847 | 136.2541 | 143.6761 | 108.7702 | 0.436049 | 0.111487 | 0.331694  | 0.270645  | 0.108242 | 0.858201 |
| AT3G11540 | SPY       | 431.5721 | 376.4759 | 343.8037 | 278.7929 | 313.347  | 360.8564 | 337.046  | 420.7671 | 281.1588 | 333.9184 | 325.9318 | 329.4183 | -0.27508 | 0.155276 | -0.14861  | 0.504999  | -0.21577 | 0.50721  |
| AT3G11550 | CASP2     | 0        | 1.287654 | 0.824831 | 0.662467 | 0.996841 | 0        | 1.07889  | 0.972646 | 2.878607 | 5.321336 | 2.071813 | 0.116224 | 0.884783 | 0.060984 | 0.942656  | 1.097495  | 0.197945 | NA       |
| AT3G11560 | AT3G11560 | 1571.731 | 1720.013 | 1529.733 | 711.4169 | 622.7192 | 1022.759 | 1235.243 | 1407.951 | 738.042  | 1393.246 | 1335.655 | 1445.019 | -0.99777 | 7.53E-06 | -0.09378  | 0.045065  | -0.20024 | 0.652037 |
| AT3G11570 | TBL8      | 14.26685 | 12.48972 | 6.438272 | 15.67179 | 17.22415 | 18.93997 | 15.11816 | 14.02557 | 13.66744 | 12.47396 | 14.63367 | 11.39497 | 0.54844  | 0.239165 | 0.313807  | 0.659483  | 0.170104 | NA       |
| AT3G11580 | ARF32     | 13.07794 | 14.27397 | 15.45185 | 84.95761 | 90.09555 | 74.76306 | 48.91169 | 50.70783 | 39.04964 | 15.35257 | 22.61568 | 8.287252 | 2.355867 | 9.32E-14 | 1.52733   | 7.57E-06  | 0.045394 | 0.96566  |
| AT3G11590 | AT3G11590 | 362.6157 | 280.1266 | 321.9136 | 230.9527 | 205.3649 | 255.1912 | 242.7799 | 316.1148 | 233.3228 | 294.5774 | 304.6465 | 305.5924 | -0.48121 | 0.005146 | -0.28736  | 0.134313  | -0.09695 | 0.792525 |
| AT3G11591 | AT3G11591 | 0        | 0        | 0.412416 | 3.974804 | 1.993682 | 0        | 0        | 0        | 0.972646 | 1        | 1.330334 | 1.035907 | 0.934581 | NA       | 0.126684  | NA        | 0.355513 | NA       |
| AT3G11600 | AT3G11600 | 28.53369 | 71.36984 | 55.36914 | 80.83345 | 78.17114 | 76.75674 | 72.92289 | 71.20674 | 100.5533 | 65.24842 | 55.87403 | 63.1903  | 0.605586 | 0.034904 | 0.654074  | 0.028199  | 0.269189 | 0.622275 |
| AT3G11620 | AT3G11620 | 111.757  | 164.1506 | 130.0531 | 124.5495 | 142.4305 | 113.6398 | 131.6169 | 111.1257 | 97.6246  | 138.1713 | 138.3547 | 129.4883 | -0.0705  | 0.78681  | -0.22904  | 0.351893  | 0.015095 | 0.9802   |
| AT3G11630 | BAS1      | 4393     | 4328.581 | 4401.203 | 2253.439 | 2578.985 | 2255.851 | 3663.041 | 3219.408 | 3969.416 | 4719.956 | 4441.985 | 5637.403 | -0.87836 | 1.65E-12 | -0.27089  | 0.057747  | 0.171705 | 0.456833 |
| AT3G11640 | AT3G11640 | 5.94452  | 3.568492 | 5.150617 | 10.13039 | 8.612075 | 12.95893 | 5.335821 | 5.39445  | 9.76246  | 6.716749 | 6.65167  | 5.179533 | 0.83037  | 0.136714 | 0.312654  | 0.659591  | 0.201504 | NA       |
| AT3G11650 | NHL2      | 59.4452  | 44.60165 | 46.35556 | 123.7247 | 119.9066 | 127.9566 | 90.61099 | 107.889  | 144.8484 | 52.77446 | 43.91012 | 53.86714 | 1.128793 | 5.02E-08 | 1.628793  | 6.66E-07  | -0.0075  | 0.992275 |
| AT3G11660 | NHL1      | 512.4176 | 538.8423 | 485.4457 | 615.7365 | 524.0116 | 515.3667 | 398.408  | 460.686  | 480.313  | 406.8431 | 427.0372 | 349.1005 | 0.111591 | 0.512925 | -0.19475  | 0.248705  | -0.37214 | 0.071661 |
| AT3G11670 | DGD1      | 926.1562 | 1011.667 | 831.8247 | 572.0204 | 563.7596 | 559.2277 | 497.1206 | 457.4493 | 306.5412 | 750.3569 | 870.0384 | 768.6426 | -0.69264 | 4.36E-05 | -1.10991  | 2.44E-11  | -0.20868 | 0.502444 |
| AT3G11673 | AT3G11673 | 0        | 0        | 0.412416 | 1.987402 | 0.996841 | 3.557214 | 2.15778  | 1.952492 | 5.757214 | 2.660668 | 10.35907 | 0.116224 | 0.884783 | 0.060984 | 0.942656  | 1.097495  | 0.197945 | NA       |
| AT3G11680 | ALMT8     | 9.511232 | 3.568492 | 5.150617 | 2.062078 | 1.987402 | 0.996841 | 3.557214 | 2.15778  | 1.952492 | 5.757214 | 2.660668 | 10.35907 | -1.15832 | 0.063624 | -0.81849  | 0.236654  | 0.040377 | NA       |
| AT3G11690 | AT3G11690 | 116.5126 | 114.1917 | 106.8753 | 64.74925 | 60.94699 | 64.79465 | 45.35448 | 57.18117 | 52.71728 | 113.2252 | 91.79304 | 114.9856 | -0.80162 | 0.64E-05 | -1.08903  | 2.96E-07  | -0.0656  | 0.893141 |
| AT3G11700 | FLA18     | 979.6569 | 811.8319 | 713.3605 | 487.8876 | 559.7848 | 589.1329 | 456.2127 | 456.3704 | 754.6382 | 711.0159 | 594.6593 | 704.4164 | -0.59828 | 0.004563 | -0.57058  | 0.008669  | -0.30782 | 0.387005 |
| AT3G11710 | ATRXS-1   | 1191.282 | 1236.482 | 1206.532 | 1144.041 | 1065.91  | 1286.921 | 1175.659 | 1236.408 | 782.9493 | 1109.223 | 1094.865 | 1102.205 | -0.05522 | 0.801502 | -0.18228  | 0.365062  | -0.13356 | 0.689425 |
| AT3G11720 | AT3G11720 | 205.6804 | 217.678  | 242.079  | 179.8132 | 222.589  | 206.346  | 223.2152 | 180.1746 | 151.3181 | 271.5486 | 280.7005 | 242.4021 | -0.13038 | 0.551113 | -0.25411  | 0.2358    | 0.24915  | 0.432745 |
| AT3G11730 | RABD1     | 356.6712 | 321.1643 | 457.1173 | 477.5772 | 467.7019 | 424.6542 | 482.8918 | 477.9482 | 481.2893 | 509.5134 | 570.7133 | 430.9371 | 0.263994 | 0.130642 | 0.334458  | 0.058875  | 0.39838  | 0.086495 |
| AT3G11740 | AT3G11740 | 0        | 0        | 0.412416 | 1.987402 | 0.996841 | 3.557214 | 2.15778  | 1.952492 | 5.757214 | 2.660668 | 10.35907 | 0.116224 | 0.884783 | 0.060984 | 0.942656  | 1.097495  | 0.197945 | NA       |
| AT3G11745 | AT3G11745 | 11.88904 | 9.62671  | 7.725926 | 30.51875 | 33.12336 | 18.93997 | 19.56468 | 20.49891 | 35.14486 | 28.78607 | 46.56169 | 18.64632 | 0.96035  | 0.028998 | 0.818783  | 0.084604  | 1.08664  | 0.071883 |
| AT3G11750 | FOLB1     | 32.10041 | 26.76369 | 32.19136 | 37.94223 | 41.73544 | 39.87363 | 34.68284 | 28.05114 | 31.23987 | 43.1791  | 47.89202 | 46.61579 | 0.351838 | 0.272824 | 0.03209   | 0.941988  | 0.544996 | 0.239343 |
| AT3G11760 | AT3G11760 | 178.3356 | 160.5821 | 126.1901 | 107.228  | 129.1811 | 109.6525 | 141.3993 | 129.4668 | 127.8882 | 159.6327 | 129.0424 | 124.3088 | -0.41757 | 0.03211  | -0.21504  | 0.343773  | -0.23728 | 0.49028  |
| AT3G11770 | AT3G11770 | 126.0238 | 124.8972 | 101.7247 | 121.2502 | 160.3171 | 104.6683 | 174.3035 | 119.7568 | 210.8691 | 150.1647 | 195.5591 | 148.1346 | 0.130714 | 0.617152 | 0.506065  | 0.062688  | 0.463805 | 0.23281  |
| AT3G11773 | AT3G11773 | 1.188904 | 0        | 0        | 1.649662 | 1.324935 | 1.993682 | 5.57214  | 1.07889  | 1.952492 | 0.995936 | 2.660668 | 0        | 0.516567 | 0.463989 | 0.726896  | 0.29782   | 0.289378 | NA       |
| AT3G11780 | AT3G11780 | 319.8152 | 322.9485 | 338.6531 | 356.3271 | 353.0951 | 350.888  | 326.7344 | 275.1169 | 413.9283 | 363.664  | 472.2686 | 412.2908 | 0.109273 | 0.599965 | 0.048979  | 0.84019   | 0.336593 | 0.205975 |
| AT3G11800 | AT3G11800 | 341.2154 | 383.6129 | 382.     |          |          |          |          |          |          |          |          |          |          |          |           |           |          |          |

|           |           |          |          |          |           |          |          |          |          |          |          |          |          |          |          |          |          |          |          |
|-----------|-----------|----------|----------|----------|-----------|----------|----------|----------|----------|----------|----------|----------|----------|----------|----------|----------|----------|----------|----------|
| AT3G12280 | RBR1      | 480.3172 | 428.219  | 359.2556 | 273.4315  | 248.4252 | 283.1028 | 237.444  | 275.1169 | 162.0568 | 380.9356 | 323.2712 | 318.0233 | -0.63971 | 0.001072 | -0.88775 | 5.13E-06 | -0.30145 | 0.356644 |
| AT3G12290 | FOLD2     | 1191.282 | 1339.969 | 1364.914 | 1787.400  | 1618.408 | 1688.648 | 1252.319 | 1365.875 | 1945.609 | 1606.263 | 1611.034 | 1364.289 | 0.38435  | 0.002102 | 0.078133 | 0.631158 | 0.231852 | 0.238435 |
| AT3G12300 | AT3G12300 | 158.1242 | 120.541  | 211.1753 | 385.6086  | 398.1428 | 301.0459 | 261.4552 | 235.2753 | 213.9764 | 174.2738 | 215.4686 | 0.896893 | 2.4E-07  | 0.873431 | 0.052269 | 0.067773 | 0.878686 |          |
| AT3G12320 | T2E22.34  | 826.2882 | 840.3799 | 857.5778 | 603.7764  | 663.1297 | 513.373  | 296.1381 | 198.5157 | 199.1542 | 793.536  | 947.1978 | 799.7198 | -0.49144 | 0.004774 | -1.81856 | 3.3E-28  | 0.008076 | 0.98764  |
| AT3G12340 | FKBP43    | 61.82301 | 39.25341 | 74.68395 | 171.34789 | 77.50867 | 65.79149 | 64.02985 | 49.62894 | 95.67211 | 61.41028 | 53.21336 | 69.40574 | 0.255371 | 0.439813 | 0.219913 | 0.541712 | 0.046507 | 0.952381 |
| AT3G12345 | AT3G12345 | 702.6422 | 756.5203 | 699.1963 | 483.7635  | 471.6767 | 368.8311 | 417.9726 | 479.0271 | 850.3101 | 614.8528 | 689.113  | 930.2441 | -0.67449 | 0.005647 | -0.29255 | 0.297617 | 0.109754 | 0.841389 |
| AT3G12350 | AT3G12350 | 197.3581 | 192.6986 | 208.6    | 197.1346  | 192.1155 | 205.3492 | 200.0933 | 172.6224 | 199.2542 | 186.1499 | 191.5681 | 150.2064 | -0.01368 | 0.912384 | -0.06457 | 0.172838 | -0.18347 | 0.546839 |
| AT3G12360 | ITN1      | 557.596  | 599.5067 | 489.3086 | 704.4058  | 589.5959 | 648.9433 | 565.597  | 641.9395 | 523.2679 | 398.2073 | 473.5989 | 430.9371 | 0.240056 | 0.122451 | 0.073074 | 0.706407 | -0.33273 | 0.126898 |
| AT3G12370 | AT3G12370 | 150.9908 | 181.9931 | 173.8333 | 221.8796  | 262.337  | 221.2987 | 195.6468 | 155.3602 | 242.109  | 181.3522 | 224.8264 | 208.2172 | 0.470626 | 0.018535 | 0.227275 | 0.332595 | 0.271373 | 0.430837 |
| AT3G12380 | ARP5      | 134.3461 | 148.0924 | 135.2037 | 130.3233  | 114.6068 | 146.5356 | 143.1779 | 166.1491 | 124.9595 | 142.9708 | 109.0874 | 143.991  | -0.09326 | 0.704314 | 0.057234 | 0.836248 | -0.06182 | 0.897035 |
| AT3G12385 | AT3G12385 | 0        | 0        | 0        | 0         | 0        | 0        | 0        | 0.889303 | 0        | 0        | 0        | 0        | 0        | 0        | 0        | 0        | 0        | 0        |
| AT3G12390 | AT3G12390 | 617.0411 | 656.6025 | 669.5803 | 757.195   | 715.4647 | 571.1898 | 533.5821 | 536.2083 | 815.1654 | 700.461  | 674.4793 | 655.7288 | 0.074489 | 0.752606 | -0.04249 | 0.871211 | 0.062597 | 0.885216 |
| AT3G12400 | ELC       | 351.9156 | 265.8527 | 283.284  | 270.957   | 304.0725 | 301.0459 | 345.9391 | 317.1936 | 370.9735 | 246.6007 | 246.1118 | 207.1813 | -0.05033 | 0.808218 | 0.189407 | 0.31208  | -0.36641 | 0.127266 |
| AT3G12410 | AT3G12410 | 2.377808 | 3.568492 | 2.575309 | 4.948987  | 4.637271 | 0        | 6.225124 | 7.55223  | 7.809968 | 9.595356 | 10.64267 | 5.179533 | 0.132356 | 0.865514 | 0.872787 | 0.186256 | 1.044127 | NA       |
| AT3G12420 | AT3G12420 | 0        | 1.784246 | 0        | 0         | 0        | 0        | 0        | 0        | 0        | 0        | 0        | 0        | -0.2184  | NA       | -0.20558 | NA       | -0.19918 | NA       |
| AT3G12430 | AT3G12430 | 0        | 0        | 0        | 0.824831  | 0        | 0.996841 | 0.889303 | 0        | 0        | 0        | 1.330334 | 1.035907 | 0.324831 | NA       | 0.149799 | NA       | 0.382926 | NA       |
| AT3G12440 | AT3G12440 | 1.188904 | 0        | 0        | 0         | 0.662467 | 0.996841 | 0        | 0        | 0        | 0        | 2.660668 | 0        | 0.042174 | NA       | -0.23577 | NA       | 0.171725 | NA       |
| AT3G12450 | AT3G12450 | 0        | 0        | 0        | 0         | 0        | 0        | 0        | 0        | 0        | 0.959536 | 1.330334 | 1.035907 | 0        | 0        | 0        | 0        | 0.604134 | NA       |
| AT3G12460 | AT3G12460 | 3.566712 | 8.92123  | 6.438272 | 2.474493  | 2.649869 | 5.981045 | 2.66791  | 4.31556  | 3.904984 | 6.762825 | 3.991002 | 6.215439 | -0.57388 | 0.373489 | -0.51851 | 0.464907 | 0.007119 | NA       |
| AT3G12470 | AT3G12470 | 0        | 1.784246 | 0        | 0.824831  | 0.662467 | 0        | 0.889303 | 0        | 0.976246 | 1.919071 | 3.991002 | 3.10772  | -0.05172 | 0.949798 | 0.03881  | 0.962827 | 0.96881  | NA       |
| AT3G12480 | NF-YC11   | 209.2471 | 221.2465 | 361.3938 | 364.9878  | 370.3192 | 332.9448 | 275.6841 | 327.9825 | 292.8738 | 280.1844 | 211.5231 | 219.6122 | 0.617093 | 0.000145 | 0.363846 | 0.004471 | 0.043063 | 0.920201 |
| AT3G12490 | CYS6      | 576.6184 | 676.2292 | 706.9222 | 1266.528  | 1081.147 | 1088.55  | 1013.806 | 1044.365 | 1524.896 | 761.8713 | 645.212  | 647.4416 | 0.794477 | 5.8E-06  | 0.852537 | 1.19E-06 | 0.068259 | 0.873998 |
| AT3G12500 | CHI-B     | 17.83356 | 8.92123  | 5.150617 | 37.52982  | 27.82363 | 25.91786 | 23.12189 | 21.5778  | 28.31113 | 10.55489 | 7.982004 | 6.215439 | 1.320602 | 0.00147  | 0.998419 | 0.027581 | -0.32002 | 0.739037 |
| AT3G12502 | AT3G12502 | 0        | 0        | 0        | 0.412416  | 0.662467 | 0        | 0        | 0        | 0.976246 | 0        | 0        | 0        | 0.208807 | NA       | 0.165973 | NA       | 0        | 0        |
| AT3G12510 | AT3G12510 | 9.511232 | 10.70548 | 10.30123 | 41.65397  | 38.4231  | 36.88311 | 34.68284 | 38.84004 | 37.09735 | 5.995356 | 13.30334 | 15.5386  | 1.739401 | 1.54E-06 | 1.645007 | 1.11E-05 | 0.249772 | 0.779875 |
| AT3G12520 | SULTR4    | 105.8215 | 121.3287 | 117.1765 | 34.64291  | 49.68505 | 40.87047 | 33.79353 | 42.07671 | 37.09735 | 134.335  | 148.9974 | 138.8115 | -1.42191 | 1.1E-11  | -1.54532 | 6E-12    | 0.291675 | 0.412988 |
| AT3G12530 | GINS2     | 29.7226  | 23.1952  | 27.04074 | 50.72712  | 39.74804 | 46.85152 | 30.23632 | 19.42002 | 35.14486 | 30.02886 | 35.91902 | 31.0772  | 0.720813 | 0.029078 | 0.069406 | 0.885885 | 0.126068 | 0.873987 |
| AT3G12540 | AT3G12540 | 0        | 0        | 0        | 0         | 0        | 0.996841 | 0        | 0        | 0        | 0.959536 | 0        | 2.071813 | 0.130527 | NA       | 0        | 0        | 0.48698  | NA       |
| AT3G12545 | AT3G12545 | 0        | 0        | 0        | 0         | 0        | 0        | 0        | 0        | 0        | 0        | 0        | 0        | #N/A     | #N/A     | #N/A     | #N/A     | #N/A     | #N/A     |
| AT3G12550 | FDM3      | 133.1572 | 137.3869 | 150.6556 | 148.882   | 151.0425 | 165.4756 | 148.5137 | 166.1491 | 125.9357 | 156.4043 | 166.2917 | 156.4219 | 0.134047 | 0.515955 | 0.060502 | 0.807768 | 0.179041 | 0.594257 |
| AT3G12560 | TRP3      | 287.7148 | 306.8903 | 276.8457 | 201.2588  | 213.9769 | 202.3587 | 248.1157 | 265.4069 | 243.0853 | 274.4272 | 270.0578 | 249.6355 | -0.48726 | 0.000316 | -0.19856 | 0.211933 | -0.12886 | 0.626543 |
| AT3G12570 | FVD       | 364.9935 | 469.2567 | 379.858  | 382.7217  | 315.9969 | 424.6542 | 409.0796 | 432.6349 | 288.9688 | 318.5658 | 296.6645 | 311.8079 | -0.10696 | 0.644382 | -0.09598 | 0.700832 | -0.37413 | 0.203688 |
| AT3G12580 | MED37C    | 82.03437 | 60.66437 | 70.82099 | 78.77137  | 61.60946 | 61.80413 | 96.93408 | 102.4945 | 123.9822 | 85.39867 | 63.85603 | 65.26211 | -0.07486 | 0.810551 | 0.564027 | 0.024622 | 0.000645 | 0.998753 |
| AT3G12585 | AT3G12585 | 0        | 0        | 0        | 0.412416  | 0.662467 | 0.996841 | 0        | 1.07889  | 0.976246 | 0.959536 | 0        | 1.035907 | 0.368842 | NA       | 0.363735 | NA       | 0.379284 | NA       |
| AT3G12587 | OST4A     | 24.96698 | 23.1952  | 14.1642  | 46.19054  | 71.54647 | 28.90838 | 49.80099 | 18.34113 | 58.57476 | 32.62421 | 70.5077  | 30.04129 | 1.053141 | 0.018779 | 0.864145 | 0.071855 | 0.90719  | 0.175002 |
| AT3G12590 | AT3G12590 | 470.806  | 424.6506 | 369.5568 | 225.5913  | 169.5916 | 291.0775 | 270.3483 | 318.2725 | 186.463  | 308.9703 | 319.2802 | 324.2387 | -0.85854 | 0.000101 | -0.68388 | 0.302089 | -0.39591 | 0.271055 |
| AT3G12600 | NUDT16    | 180.7134 | 205.1883 | 191.8605 | 272.1943  | 284.8609 | 232.2639 | 165.4104 | 160.7546 | 319.2324 | 161.202  | 158.3097 | 167.8169 | 0.437908 | 0.087571 | 0.155885 | 0.620727 | -0.23261 | 0.619797 |
| AT3G12610 | DR100     | 783.4877 | 661.9553 | 638.6766 | 240.0259  | 265.6494 | 266.1565 | 184.9751 | 204.9891 | 239.1803 | 482.6464 | 359.1902 | 617.4003 | -1.39974 | 2.91E-14 | -1.68365 | 1.47E-19 | -0.49933 | 0.066118 |
| AT3G12620 | AT3G12620 | 265.1256 | 294.4006 | 339.9407 | 341.8925  | 326.5964 | 346.9006 | 370.8396 | 351.7181 | 308.9397 | 306.9199 | 305.9768 | 310.7172 | 0.172283 | 0.285659 | 0.195201 | 0.247869 | 0.036971 | 0.920546 |
| AT3G12630 | SAP5      | 359.049  | 381.8287 | 387.584  | 603.7764  | 600.8578 | 631.0002 | 668.7562 | 613.8884 | 897.1701 | 444.265  | 552.0886 | 480.6606 | 0.688756 | 2.11E-05 | 0.933473 | 4.98E-09 | 0.387766 | 0.125034 |
| AT3G12640 | AT3G12640 | 290.0926 | 303.3218 | 265.5444 | 258.5846  | 201.3901 | 279.1154 | 320.1493 | 321.2981 | 206.9642 | 281.1439 | 228.8174 | 313.8797 | -0.21263 | 0.382378 | 0.000401 | 0.399932 | -0.05756 | 0.917498 |
| AT3G12650 | AT3G12650 | 80.84547 | 110.6233 | 103.0123 | 122.075   | 123.8814 | 80.7441  | 114.7201 | 75.5223  | 182.558  | 58.53167 | 65.18636 | 96.33931 | 0.15382  | 0.691055 | 0.325923 | 0.381289 | -0.38352 | 0.498675 |
| AT3G12660 | FLA14     | 0        | 0        | 0        | 0         | 0        | 0        | 0        | 0        | 0        | 0        | 1.330334 | 1.035907 | 0        | 0        | 0        | 0        | 0.375122 | NA       |
| AT3G12670 | emb2742   | 452.9724 | 444.2773 | 508.6235 | 377.7727  | 337.8583 | 386.7742 | 421.5299 | 444.5027 | 352.4248 | 447.1436 | 361.8508 | 450.6193 | -0.34799 | 0.025442 | -0.20527 | 0.242709 | -0.15386 | 0.591092 |
| AT3G12680 | HUA1      | 149.8019 | 144.5239 | 140.3543 | 179.4008  | 107.3197 | 168.4661 | 162.7425 | 156.439  | 108.6333 | 139.1327 | 145.0064 | 134.6678 | 0.065348 | 0.829917 | -0.02318 | 0.945106 | -0.05327 | 0.928542 |
| AT3G12685 | AT3G12685 | 60.6341  | 78.50683 | 64.38272 | 72.58514  | 62.27192 | 58.81361 | 68.47637 | 67.60119 | 57.71962 | 57.77446 | 61.19536 | 56.97684 | -0.03993 | 0.920254 | 0.235535 | 0.417333 | -0.23239 | 0.624926 |
| AT3G12690 | AGC1-5    | 57.06739 | 44.60615 | 37.34198 | 24.74493  | 33.12336 | 27.91154 | 21.34328 | 28.05114 | 17.57243 | 40.3005  | 23.94601 | 50.75942 | -0.65714 | 0.053705 | -0.97716 | 0.005657 | -0.24038 | 0.179598 |
| AT3G12700 | AT3G12700 | 84.41218 | 64.23286 | 90.1358  | 87.01969  | 76.18374 | 85.72831 | 71.44428 | 75.5223  | 78.09968 | 91.15588 | 73.16837 | 91.15977 | 0.042984 | 0.882347 | -0.10217 | 0.732823 | 0.086599 | 0.867653 |
| AT3G12710 | AT3G12710 | 185.469  | 119.5445 | 186.7099 | 113.0019  | 107.9822 | 128.5925 | 99.60199 | 76.60119 | 80.05217 | 113.2252 | 87.80204 | 101.5188 | -0.49685 | 0.022708 | -0.19915 | 2.34E-05 | -0.68545 | 0.015312 |
| AT3G12720 | ATY53     | 0        | 1.784246 | 0        | 0.2062708 | 0.324935 | 0        | 0.889303 | 0        | 2.15778  | 0        | 0        | 0        | 0.341271 | NA       | 0.216726 | NA       | -0.28009 | NA       |
| AT3G12730 | AT3G12730 | 32.10041 | 35.68492 | 42.49259 | 26.3946   | 27.16116 | 25.91786 | 38.24003 | 39.91893 | 33.19236 | 47.97678 | 54.54369 | 37.29264 | -0.44479 | 0.167269 | 0.012727 | 0.976765 | 0.31596  | 0.562353 |
| AT3G12740 | AUS1      | 482.695  | 513.8629 | 477.7198 | 691.6209  | 738.651  | 806.4442 | 915.9826 | 934.3187 | 978.1985 | 385.     |          |          |          |          |          |          |          |          |

|           |           |          |          |          |          |          |          |           |          |          |          |          |          |           |          |          |           |          |          |
|-----------|-----------|----------|----------|----------|----------|----------|----------|-----------|----------|----------|----------|----------|----------|-----------|----------|----------|-----------|----------|----------|
| AT3G13180 | AT3G13180 | 374.5047 | 412.1608 | 387.584  | 313.4358 | 243.1255 | 288.087  | 249.005   | 333.377  | 314.3512 | 377.0975 | 296.6645 | 384.3213 | -0.46174  | 0.008442 | -0.38145 | 0.041279  | -0.1414  | 0.68156  |
| AT3G13190 | AT3G13190 | 145.0463 | 162.3664 | 151.9432 | 148.4696 | 183.5034 | 137.564  | 158.296   | 151.0446 | 181.5818 | 182.3118 | 158.3097 | 175.0682 | 0.039204  | 0.871337 | 0.099071 | 0.681088  | 0.171703 | 0.625212 |
| AT3G13200 | EMB2769   | 695.5088 | 813.6162 | 755.8531 | 1031.451 | 1069.222 | 989.8629 | 945.3296  | 889.0053 | 1336.481 | 658.2414 | 458.9652 | 784.1812 | -0.437184 | 0.040342 | 0.472965 | 0.030211  | -0.24179 | 0.517409 |
| AT3G13205 | AT3G13205 | 0        | 0        | 0        | 0        | 0        | 0        | 0         | 0        | 0        | 0        | 0        | 1.035907 | 0         | NA       | 0        | NA        | 0.172362 | NA       |
| AT3G13210 | AT3G13210 | 10.70014 | 5.352738 | 3.862963 | 4.536571 | 7.28714  | 9.968408 | 7.144428  | 3.23667  | 4.88123  | 10.55489 | 11.97301 | 10.35967 | 0.014994  | 0.988378 | -0.29219 | 0.675297  | 0.541745 | NA       |
| AT3G13220 | ABC626    | 8.322328 | 17.84246 | 9.01358  | 0.412416 | 0.662467 | 0        | 1.778607  | 3.23667  | 0        | 16.31211 | 2.660668 | 13.46678 | -2.49807  | 1.78-05  | -1.7679  | 0.003746  | -0.06625 | NA       |
| AT3G13222 | GIP1      | 250.8587 | 231.952  | 211.1753 | 165.7911 | 135.1433 | 213.3239 | 177.8607  | 189.8846 | 114.2208 | 183.2713 | 180.9254 | 191.6427 | -0.42701  | 0.064438 | -0.50977 | 0.0031464 | -0.30959 | 0.415849 |
| AT3G13223 | AT3G13223 | 0        | 0        | 0        | 0.412416 | 0        | 0        | 0         | 0        | 0        | 0        | 0        | 0        | 0.095918  | NA       | 0        | NA        | 0        | NA       |
| AT3G13224 | AT3G13224 | 170.0133 | 142.7397 | 163.5321 | 202.0836 | 186.8158 | 218.3081 | 184.0858  | 185.5691 | 205.0117 | 126.6587 | 107.7571 | 161.6014 | 0.332698  | 0.082056 | 0.257741 | 0.222327  | -0.25934 | 0.431316 |
| AT3G13225 | AT3G13225 | 444.6501 | 446.0615 | 388.8716 | 338.1808 | 325.9339 | 392.7553 | 482.0025  | 488.7371 | 293.85   | 396.2882 | 369.8328 | 344.9569 | -0.27091  | 0.206531 | -0.01579 | 0.955756  | -0.19728 | 0.59327  |
| AT3G13226 | AT3G13226 | 202.1137 | 256.9314 | 238.2161 | 206.2078 | 186.8158 | 213.3239 | 210.7649  | 236.2769 | 191.3442 | 184.2308 | 168.9524 | 208.2172 | -0.19215  | 0.302704 | -0.11902 | 0.577494  | -0.29552 | 0.281585 |
| AT3G13227 | AT3G13227 | 1.188904 | 1.784246 | 0        | 0        | 0        | 0        | 0         | 1.07889  | 0        | 0.995936 | 1.330334 | 0        | -0.58191  | NA       | -0.29444 | NA        | -0.07362 | NA       |
| AT3G13228 | AT3G13228 | 0        | 1.784246 | 0        | 0        | 0        | 0        | 1.778607  | 0        | 0        | 0        | 0        | 2.071813 | -0.27794  | NA       | 0.043621 | NA        | 0.077439 | NA       |
| AT3G13229 | AT3G13229 | 1.188904 | 0        | 0        | 0        | 0.662467 | 0        | 1.778607  | 1.07889  | 0        | 0        | 0        | 0        | -0.12889  | NA       | 0.260867 | NA        | -0.23477 | NA       |
| AT3G13230 | AT3G13230 | 200.9248 | 190.9143 | 234.3531 | 262.2963 | 292.8105 | 237.2481 | 215.2114  | 173.7013 | 291.8976 | 237.0053 | 218.1748 | 258.9766 | 0.329764  | 0.126857 | 0.115567 | 0.664259  | 0.182976 | 0.641615 |
| AT3G13235 | AT3G13235 | 255.6143 | 214.1095 | 206.0247 | 354.265  | 400.7927 | 332.9448 | 263.2338  | 290.2214 | 320.2087 | 189.0285 | 242.1208 | 214.4327 | 0.672696  | 3.22E-05 | 0.358292 | 0.049398  | -0.07479 | 0.85165  |
| AT3G13240 | AT3G13240 | 21.40027 | 35.68492 | 14.1642  | 15.25938 | 7.28714  | 16.94629 | 22.23259  | 22.65669 | 9.76246  | 29.7456  | 42.57069 | 27.96948 | -0.7151   | 0.113984 | -0.30017 | 0.57728   | 0.462615 | 0.540643 |
| AT3G13250 | AT3G13250 | 4.755616 | 1.784246 | 1.287654 | 4.948987 | 3.312336 | 2.990522 | 3.557214  | 6.47334  | 4.88123  | 3.838143 | 2.660668 | 6.215439 | 0.289385  | 0.698201 | 0.525936 | 0.474236  | 0.389058 | NA       |
| AT3G13260 | AT3G13260 | 3.566712 | 5.352738 | 0        | 0.412416 | 1.324935 | 1.993682 | 2.66791   | 2.15778  | 0.976246 | 0        | 2.660668 | 1.035907 | -0.59804  | 0.401305 | -0.25403 | 0.760851  | -0.55893 | NA       |
| AT3G13270 | AT3G13270 | 26.15589 | 26.76369 | 24.46543 | 17.73387 | 30.47349 | 30.90206 | 24.01119  | 29.13003 | 13.66744 | 30.70514 | 23.94601 | 37.29264 | -4E-05    | 1        | -0.19328 | 0.697959  | 0.238016 | 0.760299 |
| AT3G13275 | AT3G13275 | 10.70014 | 14.27397 | 12.87654 | 19.79595 | 15.23675 | 15.94945 | 19.56468  | 17.26224 | 34.16861 | 19.19071 | 13.30334 | 15.5386  | 0.391235  | 0.417067 | 0.805623 | 0.077043  | 0.312141 | 0.721811 |
| AT3G13277 | AT3G13277 | 51.12287 | 46.3904  | 33.47901 | 63.09958 | 64.25933 | 63.79781 | 78.25871  | 84.15342 | 80.05217 | 40.3005  | 45.23135 | 34.18492 | 0.521711  | 0.047561 | 0.852383 | 0.000813  | -0.13197 | 0.83156  |
| AT3G13280 | AT3G13280 | 0        | 0        | 1.287654 | 0.824831 | 1.324935 | 0        | 1.07889   | 0        | 0        | 0        | 0        | 1.035907 | 0.171145  | NA       | -0.06043 | NA        | -0.04962 | NA       |
| AT3G13290 | VCR       | 271.0701 | 192.6986 | 222.7642 | 171.5649 | 133.1559 | 187.4061 | 176.0821  | 147.8079 | 119.102  | 178.4736 | 224.8264 | 203.0377 | -0.47662  | 0.027571 | -0.61778 | 0.004871  | -0.18422 | 0.652681 |
| AT3G13300 | VCS       | 939.2341 | 752.9518 | 691.4704 | 526.6547 | 487.5759 | 561.2214 | 672.3134  | 721.7774 | 425.6433 | 561.3283 | 574.7043 | 602.8976 | -0.38084  | 0.075707 | -0.44432 | 0.037007  | -0.44432 | 0.12325  |
| AT3G13310 | AT3G13310 | 85.67108 | 64.23286 | 61.80741 | 120.4253 | 98.70762 | 135.7033 | 88.93035  | 113.2834 | 206.9642 | 65.24842 | 79.82004 | 63.1903  | 0.688856  | 0.025373 | 0.885347 | 0.003983  | -0.03443 | 0.968132 |
| AT3G13320 | CAX2      | 274.6368 | 239.089  | 305.1741 | 294.8771 | 289.4982 | 309.0206 | 328.1355  | 279.4325 | 281.1588 | 245.6411 | 254.0938 | 248.6176 | 0.114638  | 0.505198 | 0.1112   | 0.548359  | -0.1363  | 0.363625 |
| AT3G13330 | PA200     | 921.4006 | 851.0854 | 661.8543 | 795.5496 | 765.1497 | 1068.613 | 1052.935  | 1022.788 | 547.674  | 540.2186 | 544.1066 | 511.7378 | 0.105843  | 0.723647 | 0.104162 | 0.74292   | -0.5857  | 0.078478 |
| AT3G13335 | AT3G13335 | 0        | 0        | 0        | 0        | 0        | 0        | 0         | 0        | 0        | 0        | 0        | 0        | #N/A      | #N/A     | #N/A     | #N/A      | #N/A     | #N/A     |
| AT3G13340 | AT3G13340 | 535.0068 | 578.0957 | 540.8148 | 544.801  | 592.2457 | 571.1898 | 669.6455  | 671.0695 | 632.6074 | 463.4557 | 481.5809 | 529.3482 | 0.047389  | 0.748331 | 0.255254 | 0.039567  | -0.16146 | 0.43063  |
| AT3G13350 | HMG80     | 168.8244 | 199.8518 | 145.5049 | 185.587  | 190.1281 | 195.3808 | 201.8179  | 206.068  | 175.7243 | 141.0517 | 121.0604 | 170.9246 | 0.156296  | 0.461881 | 0.188656 | 0.393749  | -0.22543 | 0.507006 |
| AT3G13360 | WIP3      | 394.7161 | 430.0033 | 408.1864 | 355.5022 | 422.6541 | 402.7237 | 409.0796  | 415.3726 | 464.6931 | 389.5715 | 427.0372 | 417.4740 | -0.0631   | 0.707149 | 0.066218 | 0.710761  | 0.00238  | 0.959156 |
| AT3G13370 | AT3G13370 | 0        | 0        | 0        | 0        | 0        | 0        | 0         | 0        | 0        | 0        | 0        | 0        | #N/A      | #N/A     | #N/A     | #N/A      | #N/A     | #N/A     |
| AT3G13380 | BRL3      | 59.4452  | 46.3904  | 54.08148 | 139.3965 | 124.5438 | 145.5388 | 187.643   | 186.648  | 163.0331 | 45.09817 | 41.24035 | 34.18492 | 1.295645  | 3.02E-10 | 1.681477 | 1.47E-16  | -0.40312 | 0.323717 |
| AT3G13390 | sk11      | 0        | 1.784246 | 0        | 0        | 1.987402 | 0        | 0.889303  | 1.07889  | 0        | 0.995936 | 0        | 0        | 0.070985  | NA       | 0.060175 | NA        | -0.08436 | NA       |
| AT3G13400 | sk13      | 4.755616 | 16.05821 | 0        | 0.412416 | 0        | 0.996841 | 0.889303  | 0        | 0        | 0.995936 | 1.330334 | 4.143626 | -1.59107  | 0.011553 | -1.55647 | 0.015355  | -0.19072 | NA       |
| AT3G13403 | AT3G13403 | 20.21137 | 17.84246 | 14.1642  | 2.886909 | 1.324935 | 3.987363 | 3.557214  | 5.39445  | 4.88123  | 17.27164 | 18.62468 | 19.68222 | -2.14962  | 5.16E-06 | -1.56393 | 0.001569  | 0.095295 | NA       |
| AT3G13404 | AT3G13404 | 28.53369 | 26.76369 | 21.89012 | 4.948987 | 11.26194 | 2.990522 | 8.003731  | 1.07889  | 7.809968 | 3.62421  | 29.26735 | 34.18492 | -1.6871   | 7.92E-05 | -1.77367 | 9.92E-05  | 0.302327 | 0.71301  |
| AT3G13405 | MIR169A   | 7.133424 | 1.784246 | 1.287654 | 0.824831 | 0.662467 | 0        | 0.889303  | 0        | 0.976246 | 1.916701 | 0        | 4.143626 | -1.07779  | 0.09744  | -0.96929 | 0.15354   | -0.37154 | NA       |
| AT3G13410 | AT3G13410 | 2363.541 | 2462.26  | 2539.254 | 2046.818 | 2338.508 | 2278.778 | 2509.614  | 2355.217 | 2822.327 | 2597.463 | 2787.05  | 2619.808 | -0.14388  | 0.241764 | 0.061569 | 0.671068  | 0.118881 | 0.561647 |
| AT3G13420 | AT3G13420 | 23.77808 | 14.27397 | 19.31482 | 21.85803 | 19.87402 | 24.92102 | 18.65737  | 20.49891 | 19.19071 | 31.92802 | 25.89766 | 0        | 0.156999  | 0.734496 | 0.062382 | 0.899703  | 0.338975 | 0.634377 |
| AT3G13430 | AT3G13430 | 154.5575 | 155.2294 | 131.3407 | 228.4782 | 265.6494 | 249.2102 | 272.1269  | 266.4858 | 272.3726 | 148.728  | 178.2648 | 136.7397 | 0.738546  | 4.23E-06 | 0.865602 | 8.04E-08  | 0.064756 | 0.875455 |
| AT3G13432 | AT3G13432 | 0        | 0        | 0        | 0.824831 | 3.974804 | 0        | 3.557214  | 1.07889  | 1.952492 | 0        | 0        | 0        | 0.736589  | 0.224075 | 0.905918 | 0.135196  | 0        | NA       |
| AT3G13433 | AT3G13433 | 1.188904 | 0        | 0        | 12.78488 | 11.92441 | 13.95577 | 13.535821 | 6.47334  | 6.833722 | 0        | 0        | 0        | 2.567454  | 6.55E-06 | 1.632941 | 0.008669  | -0.34601 | NA       |
| AT3G13435 | AT3G13435 | 0        | 0        | 3.71174  | 6.498969 | 2.990522 | 0        | 2.15778   | 2.92878  | 0        | 0        | 0        | 0        | 1.289381  | 0.032004 | 0.746469 | 0.256721  | 0        | NA       |
| AT3G13437 | AT3G13437 | 21.40027 | 33.90067 | 25.75309 | 131.1482 | 164.9544 | 132.5798 | 54.24751  | 40.99782 | 81.02842 | 24.94793 | 38.57969 | 22.78994 | 2.278989  | 4.92E-15 | 1.054027 | 0.001227  | 0.075685 | 0.931283 |
| AT3G13438 | SADHU7-1  | 2.377808 | 1.784246 | 2.575309 | 1.649662 | 0        | 0.996841 | 1.778607  | 1.07889  | 1.952492 | 0        | 1.330334 | 2.071813 | -0.54614  | 0.446307 | -0.21203 | 0.801996  | -0.42685 | NA       |
| AT3G13440 | AT3G13440 | 130.7794 | 112.4075 | 115.8889 | 92.38109 | 114.6068 | 97.6904  | 136.9527  | 106.8101 | 126.912  | 94.03449 | 115.7391 | 100.4829 | -0.23976  | 0.278728 | 0.0434   | 0.879609  | -0.21781 | 0.565684 |
| AT3G13445 | TBP1      | 158.1242 | 162.3664 | 176.4086 | 245.7997 | 221.2641 | 204.3524 | 193.8682  | 180.1746 | 223.5603 | 181.3522 | 182.2558 | 162.6373 | 0.43395   | 0.100435 | 0.261297 | 0.177267  | 0.078861 | 0.843797 |
| AT3G13450 | DIN4      | 202.1137 | 253.5205 | 245.942  | 213.2189 | 241.8006 | 242.2323 | 234.5958  | 343.087  | 355.8286 | 220.6932 | 160.9704 | 262.0844 | 0.026303  | 0.916889 | 0.544479 | 0.003468  | -0.07437 | 0.864774 |
| AT3G13460 | ECT2      | 2850.992 | 2023.335 | 2039.644 | 1840.611 | 1810.521 | 2070.438 | 2088.974  | 2517.05  | 230.166  | 1579.369 | 1950.27  | 1666.774 | -0.26977  | 0.12937  | 0.037632 | 0.923875  | -0.40624 | 0.083116 |
| AT3G13470 | CPN60B2   | 227.8907 | 1077.685 | 1218.121 | 627.6965 | 622.0568 | 755.6035 | 636.7413  | 755.223  | 822.9754 | 1513.188 | 1285.103 | 1489.634 | -0.83113  | 4.02E-09 | -0.6872  | 2.08E-06  | 0.25369  |          |





|           |           |           |          |          |          |          |          |          |          |          |           |          |          |          |          |          |          |          |          |
|-----------|-----------|-----------|----------|----------|----------|----------|----------|----------|----------|----------|-----------|----------|----------|----------|----------|----------|----------|----------|----------|
| AT3G14690 | CYP72A15  | 559.9738  | 620.9176 | 597.4716 | 621.0979 | 513.4121 | 625.0192 | 804.8197 | 835.0608 | 614.0587 | 619.86    | 657.185  | 586.3231 | -0.01405 | 0.948636 | 0.337926 | 0.040977 | 0.06688  | 0.852376 |
| AT3G14700 | AT3G14700 | 11.88904  | 8.92123  | 11.58889 | 25.98218 | 31.79843 | 11.96209 | 7.114428 | 12.94668 | 64.6369  | 6.65167   | 7.251346 | 0.973906 | 0.030974 | 0.053265 | 0.938832 | 0.41667  | NA       | NA       |
| AT3G14710 | AT3G14710 | 1.188904  | 3.568492 | 0        | 0        | 0.142156 | 6.624673 | 3.987363 | 3.23667  | 2.928738 | 3.838143  | 3.991002 | 4.143626 | 0.941525 | 0.146172 | 0.832386 | 0.232877 | -0.73647 | NA       |
| AT3G14720 | MPK19     | 360.2379  | 369.3389 | 354.1049 | 300.2385 | 322.6216 | 312.0112 | 301.4739 | 320.4303 | 254.8002 | 454.8199  | 429.6979 | 420.5781 | -0.21105 | 0.14581  | -0.30178 | 0.040847 | 0.267295 | 0.196967 |
| AT3G14730 | PCMP-E31  | 22.58917  | 23.1952  | 18.02716 | 16.49662 | 16.56168 | 22.92734 | 20.45398 | 26.97225 | 18.54867 | 18.23118  | 22.61568 | 11.39497 | -0.19087 | 0.683006 | 0.045679 | 0.934019 | -0.26711 | 0.742107 |
| AT3G14735 | U6-1      | 1.188904  | 0        | 0        | 0        | 0.412416 | 0        | 0        | 1.778607 | 0        | 0         | 0        | 0        | -0.13507 | NA       | 0.094888 | NA       | -0.20373 | NA       |
| AT3G14740 | AT3G14740 | 40.62273  | 28.54794 | 32.19136 | 43.71605 | 41.07297 | 32.89575 | 24.34328 | 28.05114 | 32.21643 | 46.05771  | 26.60668 | 61.11849 | 0.203252 | 0.611965 | -0.30306 | 0.475758 | 0.376041 | 0.538195 |
| AT3G14750 | FLX1      | 10.42556  | 94.56504 | 103.0123 | 98.97974 | 94.73282 | 117.6272 | 94.26617 | 87.39009 | 77.12343 | 110.34662 | 90.46271 | 90.12387 | 0.15649  | 0.530805 | -0.09092 | 0.758198 | 0.076893 | 0.879935 |
| AT3G14760 | AT3G14760 | 74.90095  | 87.42806 | 106.8753 | 34.64291 | 43.06037 | 32.89575 | 28.45771 | 23.73558 | 36.1211  | 99.79171  | 102.4357 | 96.33931 | -1.22636 | 2.17E-07 | -1.52196 | 2.03E-09 | 0.147082 | 0.768619 |
| AT3G14770 | SWEET2    | 183.0912  | 160.5821 | 172.5457 | 89.08176 | 113.9444 | 127.5956 | 115.6095 | 91.70564 | 88.83839 | 138.1731  | 148.9974 | 131.5601 | -0.64975 | 0.000885 | -0.77972 | 0.00112  | -0.30089 | 0.365876 |
| AT3G14780 | AT3G14780 | 13.07794  | 7.136984 | 14.1642  | 8.248311 | 7.28714  | 10.96525 | 8.003731 | 5.39445  | 5.87476  | 11.51443  | 11.97301 | 16.5745  | -0.36818 | 0.502207 | -0.69169 | 0.21698  | 0.165615 | NA       |
| AT3G14790 | RHM3      | 364.9935  | 253.3629 | 262.6815 | 193.0105 | 207.3523 | 194.384  | 200.9826 | 176.938  | 166.9381 | 199.5834  | 279.3701 | 205.1095 | -0.55905 | 0.004099 | -0.68038 | 0.000576 | -0.36864 | 0.225684 |
| AT3G14800 | AT3G14800 | 189.0357  | 219.4623 | 197.0111 | 176.5139 | 182.841  | 191.3934 | 217.8794 | 178.0168 | 141.5557 | 251.3983  | 291.3431 | 210.289  | -0.13185 | 0.572252 | -0.16081 | 0.510395 | 0.307656 | 0.334202 |
| AT3G14810 | MS15      | 386.3938  | 317.5958 | 312.9    | 55.26369 | 47.69764 | 90.71251 | 69.36567 | 80.91675 | 56.62227 | 345.4328  | 316.6195 | 304.5565 | -2.34916 | 2.16E-30 | -2.22189 | 5.77E-26 | -0.07183 | 0.88409  |
| AT3G14820 | AT3G14820 | 0         | 0        | 0        | 0        | 0.412416 | 0        | 0        | 0        | 0        | 0         | 0        | 0        | 0.065109 | NA       | 0        | NA       | 0.150531 | NA       |
| AT3G14830 | AT3G14830 | 229.4585  | 231.952  | 222.7642 | 233.0148 | 225.2389 | 282.1059 | 305.9204 | 263.2491 | 214.7741 | 186.1499  | 196.8894 | 207.1813 | 0.105471 | 0.620544 | 0.194809 | 0.352685 | -0.20838 | 0.522817 |
| AT3G14840 | LRR-RLK   | 890.44891 | 735.1094 | 741.6889 | 991.447  | 894.3308 | 1169.294 | 921.3184 | 1031.419 | 755.6144 | 529.6637  | 470.9382 | 595.6463 | 0.358111 | 0.041761 | 0.188576 | 0.35077  | -0.55721 | 0.010511 |
| AT3G14850 | TBL41     | 16.64466  | 8.92123  | 14.73891 | 7.835896 | 14.57428 | 11.96209 | 7.114428 | 12.94668 | 12.6912  | 10.55489  | 13.30334 | 23.82585 | -0.30219 | 0.585778 | -0.54191 | 0.336915 | 0.12591  | NA       |
| AT3G14855 | AT3G14855 | 0         | 0        | 0        | 0        | 0.824831 | 1.987402 | 0        | 1.778607 | 0        | 0         | 0        | 0        | 0.451224 | NA       | 0.275152 | NA       | 0.153083 | NA       |
| AT3G14860 | AT3G14860 | 281.7702  | 278.3424 | 280.7086 | 237.139  | 207.3523 | 219.305  | 261.4552 | 252.4602 | 221.6078 | 273.4677  | 276.7095 | 270.3716 | -0.33264 | 0.022255 | -0.19034 | 0.253356 | -0.03588 | 0.92132  |
| AT3G14870 | AT3G14870 | 78.46766  | 53.52738 | 63.09506 | 32.58083 | 23.18635 | 39.87363 | 44.46517 | 49.62894 | 44.90732 | 42.21957  | 46.56169 | 53.86714 | -1.00857 | 0.000196 | -0.48068 | 0.116478 | -0.44386 | 0.327108 |
| AT3G14880 | AT3G14880 | 0         | 0        | 1.287654 | 0        | 0.662467 | 0        | 0        | 0        | 0        | 0         | 0        | 0        | -0.80303 | NA       | -0.19692 | NA       | -0.19582 | NA       |
| AT3G14890 | ZDP       | 143.8574  | 71.36984 | 105.5877 | 58.56301 | 54.32232 | 59.81045 | 74.70149 | 53.9445  | 53.69353 | 105.5489  | 103.766  | 117.0574 | -0.87688 | 0.000423 | -0.79319 | 0.002504 | 0.005875 | 0.993112 |
| AT3G14900 | AT3G14900 | 180.7134  | 135.6027 | 104.3    | 104.3411 | 96.72022 | 119.6209 | 79.14801 | 110.0468 | 166.9381 | 117.0633  | 115.7391 | 108.7702 | -0.3794  | 0.197335 | -0.23288 | 0.485376 | -0.28838 | 0.56626  |
| AT3G14910 | AT3G14910 | 93.92341  | 108.839  | 95.28642 | 125.7868 | 117.2567 | 98.68724 | 121.8346 | 108.9679 | 90.79088 | 98.83217  | 69.17737 | 114.9856 | 0.208216 | 0.424248 | 0.114002 | 0.707213 | -0.05384 | 0.927039 |
| AT3G14920 | AT3G14920 | 224.7028  | 181.9931 | 182.8469 | 188.4739 | 195.4278 | 215.3176 | 183.1965 | 146.729  | 178.653  | 174.6355  | 152.9884 | 179.2118 | 0.011064 | 0.962879 | -0.21186 | 0.299464 | -0.21545 | 0.492249 |
| AT3G14930 | HEM1E     | 2936.593  | 2976.122 | 2984.783 | 1592.749 | 1671.405 | 1749.456 | 1805.286 | 1792.036 | 2009.114 | 3304.641  | 3140.919 | 3152.264 | -0.62434 | 1.7E-21  | -0.66234 | 5.27E-14 | 0.109073 | 0.515113 |
| AT3G14940 | PPC3      | 77.27876  | 53.52738 | 52.79383 | 11.54764 | 6.624673 | 4.984204 | 16.00746 | 12.94668 | 11.71495 | 48.93632  | 65.18636 | 53.86714 | -6.21222 | 1.16E-15 | -1.99626 | 2.01E-09 | -0.13508 | 0.84885  |
| AT3G14950 | TTL2      | 8.322328  | 5.32738  | 2.575309 | 4.536571 | 1.987402 | 1.996841 | 1.778607 | 1.07889  | 0.976246 | 6.716749  | 5.321336 | 4.133626 | -0.63403 | 0.351252 | -1.12966 | 0.023208 | 0.009966 | NA       |
| AT3G14960 | B3GAL113  | 129.5905  | 157.2798 | 155.2309 | 184.3498 | 196.0903 | 198.3713 | 168.0784 | 162.9124 | 171.8193 | 149.6876  | 151.6581 | 143.6619 | 0.388225 | 0.020337 | 0.192494 | 0.334436 | -0.01527 | 0.975777 |
| AT3G14970 | AT3G14970 | 0         | 0        | 0        | 0        | 0        | 0        | 0        | 0        | 0        | 0         | 0        | 0        | #N/A     | #N/A     | #N/A     | #N/A     | #N/A     | #N/A     |
| AT3G14980 | IDM1      | 299.6038  | 240.8732 | 233.0654 | 103.1039 | 105.3323 | 115.6335 | 156.5174 | 215.778  | 161.0806 | 249.4793  | 231.4781 | 254.833  | -1.23868 | 5.81E-13 | -0.5334  | 0.00413  | -0.0729  | 0.860898 |
| AT3G14981 | AT3G14981 | 0         | 0        | 0        | 0        | 0        | 0        | 0        | 0        | 0        | 0         | 0        | 0        | #N/A     | #N/A     | #N/A     | #N/A     | #N/A     | #N/A     |
| AT3G14990 | D11A      | 319.8152  | 337.2225 | 350.242  | 859.8865 | 878.4316 | 1027.743 | 2120.989 | 2410.24  | 2390.826 | 309.93    | 268.7275 | 319.0592 | 1.436069 | 3.77E-30 | 2.749187 | 6E-11    | -0.15959 | 0.547662 |
| AT3G15000 | MORF8     | 429.1943  | 314.0273 | 244.6543 | 391.7948 | 306.7223 | 279.1154 | 264.1231 | 315.0359 | 321.1849 | 230.2886  | 231.4781 | 264.1562 | -0.01158 | 0.969007 | -0.13313 | 0.632067 | -0.43246 | 0.192021 |
| AT3G15010 | UBA2C     | 356.6712  | 378.2602 | 386.2963 | 254.048  | 208.6772 | 305.0333 | 287.245  | 347.4026 | 252.8477 | 352.1496  | 355.1992 | 304.5565 | -0.5403  | 0.002596 | -0.33095 | 0.094956 | -0.14491 | 0.684525 |
| AT3G15020 | hMDH2     | 177.1467  | 103.4863 | 119.7519 | 100.217  | 112.6194 | 92.70619 | 90.70886 | 102.4945 | 104.4583 | 133.3755  | 123.7211 | 149.1765 | -0.38966 | 0.090654 | -0.43095 | 0.075331 | 0.007949 | 0.990348 |
| AT3G15030 | TPC4      | 583.7518  | 438.9245 | 409.4741 | 261.4175 | 304.7349 | 229.2734 | 281.0199 | 337.6926 | 336.8049 | 392.4501  | 582.6863 | 337.7055 | -0.82014 | 0.000161 | -0.56737 | 0.014441 | -0.12704 | 0.787859 |
| AT3G15040 | AT3G15040 | 172.3911  | 124.8792 | 145.5049 | 110.5274 | 140.4431 | 110.6493 | 109.3843 | 143.4924 | 174.748  | 128.5778  | 115.7391 | 133.6315 | -0.29163 | 0.225896 | -0.05991 | 0.846495 | -0.22688 | 0.58641  |
| AT3G15050 | IQD10     | 8.322328  | 3.568492 | 6.438272 | 2.474493 | 0.662467 | 0        | 0.889303 | 2.15778  | 2.928738 | 5.757214  | 1.330334 | 5.179533 | -1.34803 | 0.033267 | -0.9963  | 0.147046 | -0.36996 | NA       |
| AT3G15055 | AT3G15055 | 0         | 0        | 0        | 0        | 0        | 0        | 0        | 0        | 0        | 0         | 0        | 0        | #N/A     | #N/A     | #N/A     | #N/A     | #N/A     | #N/A     |
| AT3G15060 | RABA1G    | 40.42273  | 42.8219  | 56.65679 | 104.7536 | 89.43308 | 114.6367 | 101.3806 | 97.10009 | 140.5794 | 52.77446  | 53.21336 | 38.32854 | 1.080639 | 1.78E-05 | 1.214417 | 1.71E-06 | 0.030173 | 0.970025 |
| AT3G15070 | AT3G15070 | 278.2035  | 326.517  | 265.2568 | 195.0726 | 211.9895 | 201.3618 | 238.3333 | 245.9869 | 183.5342 | 254.2769  | 255.4241 | 200.9659 | -0.50111 | 0.003987 | -0.36848 | 0.050781 | -0.28192 | 0.323403 |
| AT3G15080 | AT3G15080 | 64.20081  | 51.74313 | 63.09506 | 84.13278 | 88.10815 | 78.75042 | 47.13308 | 64.7334  | 65.40848 | 63.32935  | 30.59768 | 52.83123 | 0.460662 | 0.099598 | -0.02931 | 0.940749 | -0.25867 | 0.624484 |
| AT3G15090 | AT3G15090 | 105.8125  | 94.56504 | 124.9025 | 143.933  | 116.6304 | 131.6169 | 119.7568 | 175.2473 | 96.9131  | 94.45371  | 110.842  | 0.347681 | 0.134444 | 0.374152 | 0.125148 | -0.10815 | 0.833777 |          |
| AT3G15095 | AT3G15095 | 911.8893  | 884.986  | 818.9482 | 480.8766 | 488.2384 | 442.5973 | 578.0473 | 748.7496 | 904.98   | 720.6113  | 822.1464 | 712.7037 | -0.27198 | 4.09E-08 | -0.22555 | 0.237296 | -0.21099 | 0.470864 |
| AT3G15110 | AT3G15110 | 337.6487  | 447.8458 | 466.1309 | 400.0431 | 415.367  | 354.8753 | 555.8147 | 499.526  | 554.5077 | 422.1957  | 510.8482 | 447.5116 | -0.08857 | 0.650755 | 0.36189  | 0.031503 | 0.140337 | 0.648547 |
| AT3G15111 | AT3G15111 | 0         | 0        | 0        | 0        | 0        | 0        | 0        | 0        | 0        | 0         | 0        | 0        | #N/A     | #N/A     | #N/A     | #N/A     | #N/A     | #N/A     |
| AT3G15115 | AT3G15115 | 70.14533  | 44.60615 | 68.24568 | 40.41673 | 35.11077 | 36.88311 | 37.35075 | 40.99782 | 48.8123  | 65.24842  | 87.80204 | 95.3034  | -0.68285 | 0.012567 | -0.52062 | 0.084142 | 0.397678 | 0.363526 |
| AT3G15120 | AT3G15120 | 10.1719   | 287.2636 | 265.2568 | 115.0726 | 164.2919 | 188.4029 | 231.2189 | 265.4069 | 203.0592 | 247.5602  | 243.4511 | 254.833  | -0.79794 | 1.79E-05 | -0.45557 | 0.024888 | -0.36386 | 0.223515 |
| AT3G15130 | PCMP-H86  | 26.15589  | 16.05821 | 18.25716 | 19.54766 | 17.28714 | 14.95261 | 11.5778  | 15.61926 | 11.71867 | 15.10978  | 11.97301 | 13.46678 | -0.7745  | 0.074381 | -0.13567 | 0.181455 | -0.32493 | 0.696656 |
| AT3G15140 | AT3G15140 | 53.50068  | 46.      |          |          |          |          |          |          |          |           |          |          |          |          |          |          |          |          |



|           |             |           |          |          |          |          |          |           |          |          |           |          |          |           |           |          |          |          |          |
|-----------|-------------|-----------|----------|----------|----------|----------|----------|-----------|----------|----------|-----------|----------|----------|-----------|-----------|----------|----------|----------|----------|
| AT3G16490 | IQD26       | 19.02246  | 19.62671 | 19.31482 | 18.14629 | 16.56168 | 19.93682 | 11.56095  | 25.89336 | 15.61994 | 18.23118  | 19.95501 | 19.68222 | -0.08155  | 0.872882  | -0.12913 | 0.813558 | -0.00264 | 0.997973 |
| AT3G16500 | IAA26       | 354.2934  | 285.4794 | 397.8852 | 447.4709 | 476.314  | 419.67   | 441.0945  | 348.4815 | 432.477  | 408.7622  | 368.5025 | 404.0035 | 0.360768  | 0.027651  | 0.226382 | 0.219378 | 0.17818  | 0.546902 |
| AT3G16510 | AT3G16510   | 21.40027  | 21.41095 | 16.73951 | 25.05532 | 27.16116 | 58.81361 | 52.46891  | 45.31338 | 43.93107 | 14.39303  | 13.30334 | 8.287252 | 0.905417  | 0.015221  | 1.145519 | 0.002194 | -0.61868 | 0.364765 |
| AT3G16520 | UGT88A1     | 1645.443  | 1579.058 | 1440.885 | 974.1256 | 956.6027 | 717.7254 | 694.546   | 710.9885 | 673.6097 | 1329.916  | 1572.455 | 1345.643 | -0.8017   | 6.67E-09  | -1.14949 | 4.86E-17 | -0.13424 | 0.626086 |
| AT3G16530 | AT3G16530   | 301.9816  | 360.4177 | 356.6803 | 383.1341 | 465.052  | 398.7363 | 1386.424  | 1206.199 | 1563.946 | 181.3522  | 292.6735 | 295.2334 | 0.284627  | 0.184058  | 1.981962 | 1.71E-28 | -0.39691 | 0.197759 |
| AT3G16540 | DepP11      | 2.377808  | 0        | 2.575309 | 0.824831 | 1.987402 | 0        | 0.889303  | 1.07889  | 0        | 0.1919071 | 1.330334 | 1.035907 | -0.31776  | 0.6070951 | -0.47689 | 0.51404  | -0.10821 | NA       |
| AT3G16550 | DEGP12      | 1.188904  | 0        | 0        | 0        | 0        | 0        | 0         | 1.07889  | 0        | 0         | 0        | 0        | -0.2127   | NA        | -0.02202 | NA       | -0.1938  | NA       |
| AT3G16552 | AT3G16552   | 0         | 0        | 0        | 0        | 0        | 0        | 0         | 0        | 0        | 0         | 0        | 0        | #N/A      | #N/A      | #N/A     | #N/A     | #N/A     | #N/A     |
| AT3G16555 | AT3G16555   | 1.188904  | 0        | 0        | 0        | 0        | 0        | 0.996841  | 0        | 0        | 0         | 0        | 0        | -0.04024  | NA        | -0.19161 | NA       | -0.1875  | NA       |
| AT3G16560 | AT3G16560   | 196.1692  | 181.9931 | 193.1482 | 254.048  | 282.8735 | 249.2102 | 304.1418  | 243.8291 | 285.0638 | 155.4448  | 211.5231 | 182.3195 | 0.449706  | 0.008235  | 0.533093 | 0.001999 | -0.0671  | 0.86931  |
| AT3G16565 | AT3G16565   | 53.50068  | 58.88012 | 37.34198 | 218.1678 | 173.5664 | 188.4029 | 152.0709  | 165.0702 | 161.0806 | 30.70514  | 31.92802 | 55.93895 | 1.895938  | 8.46E-17  | 1.617581 | 4.68E-12 | -0.29848 | 0.556808 |
| AT3G16570 | RALF23      | 458.9169  | 471.041  | 413.337  | 364.163  | 309.3722 | 322.9764 | 195.6468  | 251.3814 | 360.2348 | 431.791   | 428.3675 | 340.8132 | -0.41566  | 0.054603  | -0.71332 | 0.000688 | -0.15656 | 0.707971 |
| AT3G16580 | AT3G16580   | 1.188904  | 0        | 0        | 0        | 0        | 0        | 0         | 0.889303 | 0        | 0         | 1.330334 | 1.035907 | -0.29792  | NA        | -0.06144 | NA       | 0.167565 | NA       |
| AT3G16590 | AT3G16590   | 0         | 0        | 0        | 0        | 0        | 0        | 0         | 0        | 0        | 0.976246  | 1.919071 | 1.330334 | 0         | NA        | 0.162864 | NA       | 0.51646  | NA       |
| AT3G16600 | AT3G16600   | 0         | 1.784246 | 0        | 0        | 0.662467 | 0        | 1.778607  | 0        | 0.976246 | 0.995936  | 0        | 0        | -0.18489  | NA        | 0.212564 | NA       | -0.08528 | NA       |
| AT3G16610 | PCMP-E91    | 14.26685  | 8.92123  | 14.1642  | 13.60971 | 13.24935 | 12.95893 | 14.22886  | 11.86779 | 15.61994 | 13.4335   | 10.64267 | 14.50269 | 0.055233  | 0.924729  | 0.113646 | 0.851841 | 0.022893 | NA       |
| AT3G16620 | T0C120      | 184.2801  | 105.2705 | 121.0395 | 55.26369 | 68.8966  | 67.78517 | 58.69403  | 69.04896 | 63.45599 | 122.8206  | 139.6851 | 106.6984 | -1.0797   | 3.17E-06  | -1.07392 | 8.2E-06  | -0.16499 | 0.735214 |
| AT3G16630 | KINESIN-13A | 904.7559  | 872.4963 | 809.9346 | 491.5994 | 485.5885 | 585.1455 | 560.2612  | 685.0951 | 59.55101 | 46.05771  | 47.89202 | 58.01077 | -0.72049  | 6.84E-07  | -0.57102 | 0.000149 | -0.2181  | 0.392259 |
| AT3G16640 | TCTP        | 12250.47  | 11399.55 | 11315.91 | 10363.18 | 9718.395 | 10008.28 | 9996.66   | 10714.46 | 12736.11 | 9284.467  | 8462.254 | 10250.3  | -0.21448  | 0.107585  | -0.0635  | 0.699495 | -0.31731 | 0.068133 |
| AT3G16650 | PRL2        | 38.04493  | 32.11643 | 27.04074 | 28.45667 | 25.83622 | 30.90206 | 15.11816  | 19.42002 | 23.4299  | 32.02886  | 19.95501 | 27.96948 | -0.18239  | 0.645464  | -0.69166 | 0.065278 | -0.4119  | 0.50127  |
| AT3G16660 | AT3G16660   | 108.1903  | 149.8767 | 78.54691 | 242.5004 | 220.6016 | 184.4155 | 208.9863  | 213.6202 | 253.824  | 80.60099  | 58.53469 | 55.93895 | 0.934917  | 3.76E-05  | 0.989008 | 1.63E-05 | -0.72442 | 0.029375 |
| AT3G16670 | AT3G16670   | 107.0014  | 294.4006 | 169.9704 | 46.19054 | 30.47349 | 20.93366 | 54.24751  | 44.23449 | 30.26363 | 124.7396  | 102.4357 | 114.9856 | -2.29386  | 1.54E-12  | -1.95845 | 3.22E-09 | -0.67277 | 0.189994 |
| AT3G16680 | AT3G16680   | 0         | 0        | 0        | 0        | 0        | 0        | 0         | 0        | 0        | 0         | 1.330334 | 0        | 0         | NA        | 0        | NA       | 0.172362 | NA       |
| AT3G16690 | SWEET16     | 42.80054  | 37.46917 | 41.20494 | 35.46774 | 41.07297 | 39.87363 | 48.02239  | 55.02339 | 59.55101 | 66.20796  | 61.19536 | 48.68761 | -0.08092  | 0.820895  | 0.388584 | 0.212928 | 0.50086  | 0.241566 |
| AT3G16700 | AT3G16700   | 48.74506  | 33.90067 | 45.0679  | 100.6294 | 93.40789 | 91.70935 | 67.58706  | 63.65451 | 59.55101 | 46.05771  | 47.89202 | 58.01077 | 1.100842  | 2.37E-06  | 0.528635 | 0.053627 | 0.214036 | 0.679803 |
| AT3G16710 | AT3G16710   | 29.7226   | 24.97944 | 38.62963 | 27.21943 | 31.79843 | 26.9147  | 29.34701  | 31.28781 | 20.50117 | 35.50282  | 21.28534 | 38.32854 | -0.12362  | 0.770793  | -0.20165 | 0.647524 | 0.038054 | 0.975111 |
| AT3G16712 | AT3G16712   | 9.511232  | 8.92123  | 7.725926 | 9.485558 | 17.22415 | 7.974726 | 7.114428  | 7.55223  | 11.71495 | 5.757214  | 1.330334 | 12.43088 | 0.339784  | 0.583092  | 0.008285 | 0.991318 | -0.28033 | NA       |
| AT3G16720 | ATL2        | 55.87849  | 48.17464 | 51.50617 | 166.2035 | 158.9921 | 212.3271 | 208.097   | 286.9847 | 309.47   | 37.42189  | 35.91902 | 44.54398 | 1.700645  | 7.22E-14  | 2.272778 | 2.98E-24 | -0.38074 | 0.416253 |
| AT3G16730 | CAPH2       | 71.33424  | 53.52738 | 75.97161 | 71.34879 | 43.06037 | 67.78517 | 55.13682  | 88.46897 | 49.7032  | 45.09817  | 69.17737 | 62.15439 | -0.13988  | 0.717348  | -0.10148 | 0.813148 | -0.19281 | 0.769306 |
| AT3G16740 | AT3G16740   | 134.3461  | 119.5445 | 146.7926 | 215.2809 | 194.1029 | 189.3997 | 173.4142  | 196.358  | 246.9902 | 126.6587  | 137.0244 | 130.5242 | 0.564203  | 0.002551  | 0.599386 | 0.001799 | -0.0329  | 0.950218 |
| AT3G16750 | AT3G16750   | 83.22328  | 96.34929 | 86.27284 | 106.8156 | 98.04516 | 86.72515 | 84.04104  | 105.7312 | 95.67211 | 111.3061  | 91.79304 | 101.5188 | 0.15117   | 0.533282  | 0.123478 | 0.65007  | 0.205169 | 0.603257 |
| AT3G16760 | AT3G16760   | 225.8917  | 215.8938 | 187.9975 | 219.4051 | 196.0903 | 208.3397 | 178.3035  | 197.4369 | 162.0568 | 175.595   | 211.5231 | 233.079  | -0.10146  | 0.965307  | -0.2351  | 0.243502 | -0.02344 | 0.960926 |
| AT3G16770 | RAP2-3      | 1632.365  | 2246.366 | 1703.567 | 2538.005 | 2563.748 | 1835.184 | 1321.505  | 1556.838 | 2239.508 | 1488.24   | 1553.83  | 1231.693 | 0.305327  | 0.200662  | -0.12045 | 0.671337 | -0.37231 | 0.285974 |
| AT3G16780 | PRL9        | 441.0834  | 487.0992 | 439.0901 | 472.6282 | 492.2132 | 428.6415 | 277.4627  | 340.9292 | 488.123  | 360.7854  | 294.0038 | 487.912  | 0.028979  | 0.925328  | -0.29436 | 0.255577 | -0.24644 | 0.548492 |
| AT3G16785 | PIDP1       | 403.0384  | 383.6129 | 382.4333 | 330.7573 | 257.0373 | 380.7932 | 345.0498  | 391.637  | 230.3941 | 313.7682  | 280.7005 | 365.675  | -0.26644  | 0.259483  | -0.26657 | 0.280474 | -0.27402 | 0.468217 |
| AT3G16800 | AT3G16800   | 260.37    | 337.2225 | 320.6259 | 65.98649 | 66.90919 | 79.74726 | 65.14058  | 58.26006 | 50.57416 | 219.788   | 186.2468 | 246.5458 | -2.07092  | 1.7E-32   | -2.28005 | 1.59E-34 | -0.49668 | 0.04079  |
| AT3G16810 | APUM24      | 242.5364  | 162.3664 | 190.5728 | 212.8064 | 207.3523 | 207.3429 | 225.8831  | 211.4624 | 158.3479 | 173.6759  | 195.5591 | 187.4991 | 0.064433  | 0.801767  | -0.02809 | 0.921979 | -0.1068  | 0.806946 |
| AT3G16820 | AT3G16820   | 0         | 0        | 0        | 0        | 0        | 0        | 0         | 0        | 0        | 0         | 0        | 0        | #N/A      | #N/A      | #N/A     | #N/A     | #N/A     | #N/A     |
| AT3G16830 | TPR2        | 542.1402  | 540.6265 | 436.5148 | 409.5287 | 379.5937 | 457.5499 | 531.8035  | 622.5195 | 310.4462 | 370.3808  | 368.5025 | 349.1005 | -0.27664  | 0.25829   | -0.05072 | 0.871211 | -0.4651  | 0.162286 |
| AT3G16840 | RH13        | 426.8165  | 406.8081 | 379.858  | 332.8194 | 341.8331 | 379.7963 | 368.1716  | 414.2937 | 475.4318 | 328.1612  | 328.5925 | 404.0035 | -0.20382  | 0.230243  | 0.050145 | 0.815575 | -0.18982 | 0.419780 |
| AT3G16850 | AT3G16850   | 1406.473  | 1404.202 | 1305.682 | 628.1089 | 569.0594 | 637.9781 | 531.8035  | 600.9417 | 565.2464 | 1143.766  | 1178.676 | 1156.072 | -1.1524   | 1.18E-32  | -1.26868 | 1.55E-37 | -0.24101 | 0.113306 |
| AT3G16851 | AT3G16851   | 0         | 0        | 0        | 0        | 0        | 0        | 0         | 0        | 0        | 0         | 0        | 0        | #N/A      | #N/A      | #N/A     | #N/A     | #N/A     | #N/A     |
| AT3G16857 | ARR1        | 386.3938  | 388.9656 | 301.3111 | 322.9214 | 268.9617 | 329.9543 | 281.9092  | 372.217  | 308.4937 | 272.5081  | 272.7185 | 253.7971 | -0.21819  | 0.24146   | -0.15831 | 0.445109 | -0.41989 | 0.085147 |
| AT3G16860 | COBL8       | 294.96698 | 16.05821 | 10.30123 | 18.5587  | 19.87402 | 33.89259 | 42.68657  | 35.60337 | 41.97858 | 15.35257  | 7.982004 | 15.5386  | 0.380972  | 0.398497  | 0.095646 | 0.006227 | -0.33333 | 0.690195 |
| AT3G16870 | GATA17      | 103.4346  | 105.2705 | 113.3136 | 126.1992 | 175.5538 | 127.5956 | 130.7276  | 92.78453 | 140.5794 | 146.809   | 204.8714 | 139.8474 | 0.398382  | 0.113301  | 0.172012 | 0.570278 | 0.579051 | 0.085963 |
| AT3G16880 | AT3G16880   | 0         | 0        | 0        | 0.412416 | 0        | 0        | 0         | 0        | 0        | 0         | 0        | 0        | 0.095918  | NA        | 0        | NA       | 0        | NA       |
| AT3G16890 | PPR40       | 58.25629  | 58.88012 | 56.65679 | 43.30364 | 33.78583 | 45.85468 | 41.79726  | 53.9445  | 36.1211  | 63.32935  | 53.21336 | 47.6517  | -0.479    | 0.088208  | -0.38285 | 0.221373 | -0.07198 | 0.914481 |
| AT3G16895 | AT3G16895   | 0         | 0        | 0        | 0        | 0        | 0        | 0         | 0        | 0        | 0         | 0        | 0        | #N/A      | #N/A      | #N/A     | #N/A     | #N/A     | #N/A     |
| AT3G16900 | AT3G16900   | 2.377808  | 3.568492 | 5.150617 | 4.124156 | 3.974804 | 3.987363 | 3.557214  | 3.23667  | 1.952492 | 0.959536  | 3.991002 | 6.215439 | 0.096863  | 0.905144  | -0.20542 | 0.806882 | -0.00259 | NA       |
| AT3G16910 | AAE7        | 241.3475  | 210.544  | 208.6    | 199.1962 | 182.841  | 200.365  | 256.1194  | 320.4303 | 303.6125 | 200.5429  | 191.5681 | 154.3501 | -0.18238  | 0.338834  | 0.401477 | 0.023353 | -0.27247 | 0.337907 |
| AT3G16920 | CTL2        | 83.22328  | 55.31163 | 54.08148 | 40.00431 | 25.17376 | 28.90838 | 27.335075 | 23.73558 | 36.1212  | 82.52006  | 90.46271 | 61.11849 | -0.952657 | 0.001415  | -0.92325 | 0.003577 | 0.253075 | 0.655282 |
| AT3G16930 | AT3G16930   | 0         | 0        | 0        | 0        | 0        | 0        | 0         | 0        | 0        | 0         | 0        | 0        | #N/A      | #N/A      | #N/A     | #N/A     | #N/A     | #N/A     |
| AT3G16940 | CMTA6       | 493.3951  | 512.0786 | 464.8432 | 374.4733 | 318.6468 | 373.8153 | 479.3346  | 540.5239 | 317.2799 | 890       |          |          |           |           |          |          |          |          |

|           |           |          |          |          |          |          |          |          |          |          |          |          |          |          |          |          |          |           |          |
|-----------|-----------|----------|----------|----------|----------|----------|----------|----------|----------|----------|----------|----------|----------|----------|----------|----------|----------|-----------|----------|
| AT3G17380 | AT3G17380 | 30.9115  | 26.76369 | 41.20494 | 40.00431 | 52.33491 | 31.8989  | 23.12189 | 22.65669 | 23.4299  | 47.01725 | 18.62468 | 43.50807 | 0.30461  | 0.447515 | -0.4762  | 0.2574   | 0.143067  | 0.862231 |
| AT3G17390 | METK4     | 3605.946 | 3711.232 | 3610.583 | 2296.33  | 2343.147 | 2689.476 | 1900.442 | 2248.407 | 2558.741 | 3152.075 | 2622.088 | 3100.468 | -0.56961 | 2.95E-05 | -0.69516 | 2.67E-07 | -0.29572  | 0.1573   |
| AT3G17400 | AT3G17400 | 0        | 0        | 0        | 0.824831 | 0.662467 | 0        | 1.07889  | 0        | 0        | 0        | 0        | 0        | 0.286672 | NA       | 0.168057 | NA       | 0.173971  | NA       |
| AT3G17410 | AT3G17410 | 571.8628 | 656.6025 | 615.4988 | 800.0862 | 817.4846 | 827.3778 | 717.6679 | 784.353  | 810.2842 | 422.1957 | 375.1542 | 424.7217 | 0.406491 | 0.000389 | 0.326668 | 0.007081 | -0.58062  | 2.08E-05 |
| AT3G17420 | GPK1      | 109.3792 | 115.976  | 139.0667 | 178.9884 | 184.1659 | 157.5008 | 204.5398 | 196.358  | 168.8906 | 113.2252 | 105.0964 | 130.2542 | 0.50739  | 0.006499 | 0.629095 | 0.00082  | -0.00592  | 0.899441 |
| AT3G17430 | AT3G17430 | 202.1137 | 212.3253 | 292.2975 | 243.3252 | 221.9265 | 242.2323 | 229.4403 | 182.3324 | 153.2706 | 246.6007 | 256.7545 | 209.5241 | -0.00008 | 0.996829 | -0.31429 | 0.169185 | -0.00753  | 0.990348 |
| AT3G17440 | NPSN13    | 296.0371 | 374.6917 | 327.0642 | 362.5133 | 370.9817 | 366.8374 | 419.7512 | 407.8204 | 431.5007 | 358.8663 | 360.5205 | 376.0341 | 0.148127 | 0.208779 | 0.341417 | 0.101258 | 0.142533  | 0.560543 |
| AT3G17450 | AT3G17450 | 197.3581 | 194.4828 | 160.9568 | 161.6669 | 145.7428 | 163.4819 | 167.1891 | 202.8313 | 181.5818 | 181.3522 | 155.6491 | 161.6041 | -0.22537 | 0.386774 | -0.22537 | 0.989181 | -0.13935  | 0.685929 |
| AT3G17460 | AT3G17460 | 21.40027 | 3.568492 | 7.725926 | 12.78488 | 9.937009 | 13.95577 | 11.56095 | 10.7889  | 8.786214 | 6.716749 | 11.97301 | 4.143626 | 0.083091 | 0.902051 | -0.10796 | 0.881025 | -0.48184  | NA       |
| AT3G17465 | RPL3B     | 268.6923 | 248.0102 | 242.079  | 256.1101 | 272.9365 | 229.2734 | 232.9975 | 220.0935 | 336.8049 | 215.8955 | 200.8804 | 217.5404 | 0.001178 | 0.996775 | 0.056024 | 0.829546 | -0.25207  | 0.441758 |
| AT3G17470 | CRSH      | 286.5259 | 346.1437 | 306.4617 | 249.9238 | 208.6772 | 226.2829 | 233.7065 | 304.247  | 186.463  | 309.93   | 321.9408 | 340.8132 | -0.43735 | 0.03641  | -0.19601 | 0.425115 | -0.05298  | 0.916225 |
| AT3G17480 | AT3G17480 | 0        | 0        | 0        | 0        | 0        | 0        | 0        | 0        | 0        | 0        | 0        | 0        | #N/A     | #N/A     | #N/A     | #N/A     | #N/A      | #N/A     |
| AT3G17490 | AT3G17490 | 0        | 0        | 0        | 0        | 0        | 0        | 0        | 0        | 0        | 0        | 0        | 0        | #N/A     | #N/A     | #N/A     | #N/A     | #N/A      | #N/A     |
| AT3G17500 | AT3G17500 | 0        | 0        | 0        | 0        | 0        | 0        | 0        | 0        | 0.976246 | 0        | 0        | 0        | 0        | NA       | 0.16673  | NA       | 0         | NA       |
| AT3G17510 | CIPK1     | 1665.654 | 1805.657 | 1658.499 | 779.4654 | 818.1471 | 881.2072 | 747.0149 | 668.9118 | 361.4746 | 1681.106 | 1642.962 | 1622.23  | -1.02334 | 3.9E-08  | -1.46552 | 1.38E-15 | -0.05074  | 0.916524 |
| AT3G17520 | AT3G17520 | 7.133424 | 1.784246 | 0        | 7.42348  | 5.962205 | 4.984204 | 9.782338 | 1.07889  | 0        | 1.919071 | 0        | 0        | 0.558995 | 0.439875 | 0.131324 | 0.881915 | -0.66093  | NA       |
| AT3G17530 | AT3G17530 | 0        | 0        | 0        | 0        | 0        | 0        | 0.889303 | 0        | 0        | 0        | 0        | 0        | 0        | NA       | 0.160764 | NA       | 0         | NA       |
| AT3G17540 | AT3G17540 | 0        | 0        | 0        | 0        | 0        | 0        | 0.889303 | 0        | 0        | 0        | 0        | 0        | 0        | NA       | 0.160764 | NA       | 0         | NA       |
| AT3G17550 | AT3G17550 | 0        | 0        | 0        | 0        | 0        | 0        | 0        | 0        | 0        | 0        | 0        | 0        | #N/A     | #N/A     | #N/A     | #N/A     | #N/A      | #N/A     |
| AT3G17560 | AT3G17560 | 0        | 0        | 0        | 0        | 0        | 0        | 0        | 0        | 0        | 0        | 0        | 0        | #N/A     | #N/A     | #N/A     | #N/A     | #N/A      | #N/A     |
| AT3G17570 | AT3G17570 | 0        | 0        | 0        | 0        | 0        | 0        | 0        | 1.07889  | 0        | 0        | 0        | 0        | 0        | 1.035907 | 0.157605 | NA       | 0.924555  | NA       |
| AT3G17580 | AT3G17580 | 1.188904 | 3.568492 | 1.287654 | 5.361402 | 3.312336 | 2.990522 | 0.889303 | 1.07889  | 6.833722 | 3.838143 | 7.982004 | 6.215439 | 0.558008 | 0.430757 | 0.275114 | 0.739394 | 0.924195  | NA       |
| AT3G17590 | BSH       | 126.0238 | 110.6233 | 115.8889 | 230.9527 | 238.4882 | 197.3745 | 171.6356 | 192.0424 | 224.5366 | 125.6992 | 83.81104 | 102.5547 | 0.896801 | 2.31E-06 | 0.712745 | 0.000369 | -0.16443  | 0.694775 |
| AT3G17600 | IAA31     | 0        | 1.784246 | 0        | 0        | 1.987402 | 0        | 0        | 0        | 0        | 0.995936 | 0        | 0        | 0.079131 | NA       | -0.2403  | NA       | -0.07435  | NA       |
| AT3G17609 | HYH       | 29.7226  | 33.90067 | 46.35556 | 119.6005 | 129.1811 | 103.6714 | 76.4801  | 49.62894 | 96.64835 | 35.50282 | 53.21336 | 39.36445 | 1.586817 | 1.09E-08 | 0.951248 | 0.00175  | 0.180639  | 0.786627 |
| AT3G17611 | ATRLB14   | 38.04493 | 39.25341 | 42.49259 | 39.17948 | 45.71024 | 51.83572 | 40.90796 | 31.28781 | 51.74104 | 32.62421 | 46.56169 | 43.50807 | 0.161399 | 0.651163 | 0.049983 | 0.906705 | 0.020624  | 0.982319 |
| AT3G17620 | AT3G17620 | 0        | 0        | 0        | 0        | 0.662467 | 0        | 0        | 0        | 0        | 0        | 0        | 0        | 0.128567 | NA       | 0        | NA       | 0         | NA       |
| AT3G17626 | AT3G17626 | 7.133424 | 14.27397 | 24.46543 | 16.90904 | 25.83222 | 25.91786 | 19.56468 | 19.42002 | 23.4299  | 19.19071 | 21.28534 | 18.64632 | 0.490295 | 0.274079 | 0.388701 | 0.439136 | 0.314085  | 0.70827  |
| AT3G17630 | CHK19     | 61.82301 | 55.31163 | 59.2321  | 41.65397 | 32.4609  | 46.85152 | 46.23478 | 44.23449 | 29.28738 | 48.93632 | 38.57969 | 48.68761 | -0.53051 | 0.06285  | -0.53235 | 0.983519 | -0.34842  | 0.483716 |
| AT3G17640 | AT3G17640 | 99.86793 | 64.23286 | 73.3963  | 18.14629 | 17.22415 | 16.94629 | 16.20476 | 20.49891 | 20.50117 | 51.81492 | 49.22236 | 51.79533 | -2.06711 | 1.83E-14 | -1.95354 | 9.32E-12 | -0.6212   | 0.115464 |
| AT3G17650 | YSL5      | 797.7545 | 756.5203 | 656.7037 | 462.3179 | 445.178  | 522.3446 | 581.6045 | 623.5984 | 391.4746 | 585.3167 | 589.3379 | 686.806  | -0.6169  | 0.000609 | -0.45952 | 0.016146 | -0.24222  | 0.443857 |
| AT3G17660 | AGD15     | 14.26685 | 14.27397 | 23.17778 | 20.62078 | 22.92734 | 22.92734 | 20.45398 | 17.26224 | 20.50117 | 28.78607 | 27.93701 | 19.68222 | 0.198285 | 0.668541 | 0.140708 | 0.791271 | 0.490722  | 0.462628 |
| AT3G17668 | ENA       | 39.23283 | 37.46917 | 39.91728 | 37.1174  | 52.33491 | 27.91154 | 41.79726 | 43.1556  | 55.64602 | 41.26003 | 31.92802 | 49.72351 | 0.01894  | 0.964913 | 0.249125 | 0.518163 | 0.077992  | 0.92132  |
| AT3G17670 | AT3G17670 | 71.33424 | 98.13353 | 72.10864 | 72.58114 | 86.12075 | 68.78201 | 96.93408 | 106.8101 | 130.817  | 88.27728 | 58.53469 | 104.6266 | -0.06664 | 0.804567 | 0.465087 | 0.090773 | 0.082096  | 0.893056 |
| AT3G17675 | AT3G17675 | 0.051825 | 5.352738 | 2.575309 | 0.412416 | 0.662467 | 0        | 1.778607 | 0        | 0        | 0.959536 | 0        | 3.10772  | -0.79938 | 0.225098 | -0.62029 | 0.381927 | 0.445091  | NA       |
| AT3G17680 | AT3G17680 | 105.8125 | 66.0171  | 79.83457 | 167.8531 | 172.2415 | 155.5072 | 129.8383 | 115.4412 | 119.102  | 97.87263 | 122.3907 | 109.8061 | 0.932825 | 1.57E-06 | 0.49642  | 0.02444  | 0.348511  | 0.310396 |
| AT3G17690 | CNGC19    | 15.45575 | 21.41095 | 7.725926 | 113.8267 | 86.12075 | 114.6367 | 189.4216 | 178.0168 | 142.5319 | 8.635821 | 9.312338 | 15.5386  | 2.631559 | 4.28E-18 | 3.306235 | 0.52E-28 | -0.31388  | 0.684666 |
| AT3G17700 | CNGC20    | 238.9697 | 258.7157 | 227.9148 | 459.8434 | 468.3644 | 466.5215 | 342.3818 | 407.8204 | 352.4248 | 174.6355 | 155.6491 | 135.7038 | 0.934675 | 1.3E-11  | 0.597584 | 5.12E-05 | -0.62088  | 0.001123 |
| AT3G17710 | AT3G17710 | 28.53369 | 19.62671 | 14.1642  | 30.10634 | 27.16116 | 31.8989  | 22.23259 | 21.5778  | 26.35864 | 21.10978 | 25.27635 | 20.71813 | 0.458091 | 0.229495 | 0.139975 | 0.777398 | 0.071773  | 0.940076 |
| AT3G17712 | AT3G17712 | 110.5681 | 92.78079 | 96.57408 | 56.08852 | 33.12336 | 76.75674 | 85.37313 | 98.17898 | 34.16861 | 94.99403 | 86.47171 | 110.842  | -0.79955 | 0.021391 | -0.42887 | 0.276724 | -0.03406  | 0.971473 |
| AT3G17715 | AT3G17715 | 30.9115  | 24.97944 | 25.75309 | 35.46774 | 37.70663 | 19.93682 | 36.46144 | 28.05114 | 37.09735 | 28.78607 | 22.61568 | 29.00538 | 0.198831 | 0.624581 | 0.285795 | 0.495226 | -0.02074  | 0.983949 |
| AT3G17720 | AT3G17720 | 1.188904 | 0        | 0        | 0.412416 | 0        | 0.996841 | 0        | 0        | 0        | 0        | 0        | 0        | 0.040757 | NA       | -0.23    | NA       | -0.22302  | NA       |
| AT3G17730 | anao57    | 2.377808 | 1.784246 | 7.725926 | 1.649662 | 1.987402 | 1.993682 | 0        | 1.07889  | 1.952492 | 5.757214 | 9.312338 | 9.323159 | -0.69089 | 0.311143 | -1.00092 | 0.14666  | 0.741133  | NA       |
| AT3G17740 | AT3G17740 | 259.1811 | 269.4212 | 224.0519 | 180.638  | 194.7654 | 227.2797 | 223.2152 | 240.5925 | 143.5082 | 218.7741 | 283.3611 | 218.5763 | -0.25983 | 0.168512 | -0.29883 | 0.221334 | -0.06263  | 0.902477 |
| AT3G17750 | AT3G17750 | 492.2062 | 392.5341 | 356.6803 | 214.4561 | 203.3775 | 232.6239 | 256.1194 | 280.5114 | 211.8454 | 352.1496 | 323.2712 | 316.9874 | -0.92185 | 1.02E-08 | -0.72002 | 1.66E-05 | -0.31884  | 0.224951 |
| AT3G17760 | GAD5      | 1.188904 | 0        | 1.287654 | 0.824831 | 1.324935 | 0.996841 | 0        | 0        | 1.952492 | 4.797678 | 1.330334 | 3.10772  | 0.02574  | 0.975892 | -0.1503  | 0.857215 | 0.802841  | 0.802841 |
| AT3G17770 | AT3G17770 | 223.5139 | 253.3629 | 235.6407 | 262.7087 | 245.7754 | 291.0775 | 233.8868 | 301.0103 | 189.3917 | 232.2076 | 198.2198 | 211.3249 | 0.163809 | 0.450052 | 0.026824 | 0.930123 | -0.14112  | 0.711842 |
| AT3G17780 | AT3G17780 | 78.46766 | 137.3869 | 101.7247 | 167.4407 | 149.7176 | 123.6083 | 123.6132 | 131.6246 | 234.299  | 115.1443 | 102.4357 | 108.7702 | 0.469046 | 0.106332 | 0.063536 | 0.380307 | 0.052297  | 0.943146 |
| AT3G17790 | PAP17     | 168.8244 | 226.5992 | 184.1346 | 57.7899  | 637.956  | 579.1645 | 437.5373 | 381.927  | 277.2539 | 210.1383 | 280.7005 | 163.6732 | 1.551569 | 1.61E-13 | 0.894497 | 6.29E-05 | 0.168761  | 0.717493 |
| AT3G17800 | AT3G17800 | 902.3781 | 1083.037 | 905.221  | 818.6449 | 741.9633 | 860.2736 | 784.3537 | 769.2485 | 612.1062 | 969.131  | 953.8495 | 850.4793 | -0.25057 | 0.102371 | -0.40807 | 0.006040 | -0.05642  | 0.866496 |
| AT3G17810 | PYD1      | 381.6382 | 390.7499 | 403.0358 | 571.1956 | 522.6867 | 553.2466 | 478.4453 | 443.4238 | 341.6661 | 387.6524 | 412.4035 | 342.8851 | 0.480173 | 0.001728 | 0.103673 | 0.605064 | -0.04169  | 0.915041 |
| AT3G17820 | GLN1-3    | 303.1705 | 239.089  | 320.6259 | 645.018  | 584.9586 | 566.2056 | 530.2429 | 495.2105 | 580.8664 | 297.456  | 328.5925 | 308.7001 | 1.036909 | 4.13E-14 | 0.874124 | 5.18E-10 | -0.101259 | 0.749312 |
| AT3G17830 | AT3G17830 | 53.50068 | 49.95889 | 43.78025 | 41.65397 | 38.4231  | 43.86099 | 48.91169 | 35.60337 | 28.81163 | 48.93632 | 41.24035 | 51.79533 | -0.23933 | 0.45952  |          |          |           |          |



|           |           |          |           |          |          |          |          |          |          |          |          |          |           |          |          |          |          |          |          |
|-----------|-----------|----------|-----------|----------|----------|----------|----------|----------|----------|----------|----------|----------|-----------|----------|----------|----------|----------|----------|----------|
| AT3G19150 | KRP6      | 60.6341  | 67.80135  | 79.83457 | 198.3719 | 204.0399 | 155.5072 | 146.7351 | 151.0446 | 202.0829 | 55.65307 | 73.16837 | 62.15439  | 1.381217 | 1.31E-10 | 1.217813 | 3.66E-08 | -0.13121 | 0.807816 |
| AT3G19160 | IPR8      | 0        | 0         | 0        | 0        | 0        | 0        | 0        | 0        | 0        | 0        | 0        | 0         | #N/A     | #N/A     | #N/A     | #N/A     | #N/A     | #N/A     |
| AT3G19170 | PREP1     | 3001.982 | 2553.256  | 2316.49  | 1218.688 | 1246.763 | 1363.678 | 2274.838 | 2465.264 | 2128.216 | 2664.63  | 2626.079 | 2847.707  | -1.03035 | 4.92E-18 | -0.19532 | 0.175793 | 0.047228 | 0.874312 |
| AT3G19180 | CDP1      | 304.3594 | 306.8903  | 323.2012 | 201.2588 | 197.4152 | 241.2355 | 245.4478 | 209.3046 | 175.7243 | 291.6988 | 304.6465 | 277.6229  | -0.54538 | 0.000707 | -0.55568 | 0.000871 | -0.0964  | 0.781982 |
| AT3G19184 | AT3G19184 | 8.322328 | 5.352738  | 1.287654 | 2.886990 | 7.949607 | 3.987363 | 1.778607 | 4.31556  | 1.952492 | 7.676285 | 6.65167  | 7.251146  | -0.0244  | 0.976016 | -0.57397 | 0.42651  | 0.381482 | NA       |
| AT3G19190 | ATAT62    | 546.8958 | 560.2533  | 422.3506 | 320.8953 | 310.0347 | 442.5973 | 465.1057 | 487.6583 | 244.0615 | 375.1784 | 443.0012 | 379.1348  | -0.49276 | 0.050418 | -0.53792 | 0.228952 | -0.33901 | 0.419797 |
| AT3G19200 | AT3G19200 | 17.83356 | 10.70548  | 36.05432 | 16.49662 | 21.86142 | 13.95577 | 25.7898  | 21.5778  | 29.28778 | 21.10978 | 11.97301 | 22.78994  | -0.29065 | 0.546572 | 0.194319 | 0.71823  | -0.19355 | 0.837388 |
| AT3G19210 | CHR25     | 28.53369 | 17.84246  | 27.04074 | 35.05532 | 34.4483  | 40.87047 | 26.6791  | 25.89336 | 20.50117 | 45.09817 | 33.25835 | 40.40035  | 0.506179 | 0.136213 | -0.03842 | 0.937233 | 0.625731 | 0.212111 |
| AT3G19220 | SC02      | 83.22328 | 82.07532  | 110.7383 | 120.0129 | 107.3197 | 80.7441  | 121.8346 | 94.94231 | 131.7932 | 75.80331 | 86.47171 | 104.6266  | 0.163139 | 0.568891 | 0.321529 | 0.246983 | -0.05257 | 0.933652 |
| AT3G19230 | AT3G19230 | 4.755616 | 5.352738  | 5.150617 | 1.237247 | 0        | 0.996841 | 1.778607 | 7.55223  | 0.976246 | 9.595356 | 14.63367 | 9.323159  | -1.43724 | 0.020328 | -0.38949 | 0.609745 | 0.883554 | NA       |
| AT3G19235 | AT3G19235 | 0        | 0         | 0        | 0        | 0        | 0        | 0        | 0        | 0.976246 | 0        | 0        | 0         | #N/A     | #N/A     | 0.16673  | NA       | 0        | NA       |
| AT3G19240 | AT3G19240 | 238.9697 | 228.3835  | 238.2161 | 517.994  | 494.8631 | 579.1645 | 487.3383 | 447.7393 | 518.3866 | 187.1094 | 119.7301 | 196.8222  | 1.147902 | 1.87E-12 | 1.020869 | 7.97E-10 | -0.46451 | 0.07143  |
| AT3G19250 | AT3G19250 | 23.77808 | 17.136984 | 12.87654 | 29.28151 | 20.53649 | 36.88311 | 21.34328 | 11.86779 | 18.54867 | 11.51443 | 10.64267 | 9.323159  | 0.816163 | 0.061165 | 0.16641  | 0.779488 | -0.44117 | 0.603681 |
| AT3G19260 | LAG2      | 59.86793 | 119.5445  | 95.28642 | 162.4917 | 186.1533 | 209.3366 | 227.6617 | 182.3324 | 246.014  | 94.03449 | 93.12338 | 105.6625  | 0.804979 | 3.39E-05 | 1.04497  | 5.58E-08 | -0.08953 | 0.855952 |
| AT3G19270 | CYP707A4  | 19.00227 | 32.11643  | 20.60247 | 36.70499 | 40.4105  | 34.88943 | 20.45398 | 24.81447 | 15.61994 | 33.58375 | 31.92802 | 21.75404  | 0.588038 | 0.094573 | -0.23674 | 0.603644 | 0.240623 | 0.737955 |
| AT3G19274 | AT3G19274 | 0        | 0         | 0        | 0        | 0        | 0        | 0        | 0        | 0        | 0        | 0        | 0         | #N/A     | #N/A     | #N/A     | #N/A     | #N/A     | #N/A     |
| AT3G19280 | FUT11     | 82.03437 | 76.72258  | 74.68395 | 98.97974 | 100.0326 | 94.69987 | 95.15547 | 94.94231 | 89.81463 | 102.6703 | 109.0874 | 84.94434  | 0.322152 | 0.1394   | 0.251014 | 0.3061   | 0.327759 | 0.340957 |
| AT3G19290 | ABF4      | 342.4043 | 376.4759  | 364.4062 | 456.9565 | 465.7145 | 411.6952 | 497.1206 | 553.4705 | 539.864  | 365.5831 | 375.1542 | 368.7827  | 0.304855 | 0.016878 | 0.505086 | 6.97E-06 | 0.036513 | 0.907542 |
| AT3G19300 | AT3G19300 | 59.4452  | 49.95889  | 46.35556 | 35.05532 | 43.06037 | 42.86415 | 17.78607 | 36.68226 | 20.50117 | 48.93632 | 51.88302 | 41.43626  | -0.35945 | 0.265414 | -1.00356 | 0.00156  | -0.13071 | 0.849248 |
| AT3G19310 | AT3G19310 | 2.377808 | 0         | 6.438272 | 0.412416 | 0.662467 | 0        | 1.778607 | 1.07889  | 1.952492 | 1.919071 | 3.991002 | 4.143626  | -1.17012 | 0.073691 | -0.46729 | 0.546627 | 0.078741 | NA       |
| AT3G19320 | AT3G19320 | 0        | 1.784246  | 0        | 0.412416 | 0        | 0        | 0.889303 | 0        | 0        | 0        | 0        | 0.1035907 | -0.19389 | NA       | -0.09388 | NA       | -0.07005 | NA       |
| AT3G19325 | AT3G19325 | 0        | 0         | 0        | 0        | 0        | 0        | 0        | 0        | 0        | 0        | 0        | 0         | #N/A     | #N/A     | 0        | NA       | 0.172362 | NA       |
| AT3G19330 | AT3G19330 | 27.34479 | 14.27397  | 25.75309 | 42.89122 | 38.4231  | 33.89259 | 39.12935 | 36.68226 | 26.35864 | 18.23118 | 25.27635 | 12.43088  | 0.693841 | 0.052148 | 0.515368 | 0.198493 | -0.29737 | 0.688451 |
| AT3G19340 | AT3G19340 | 456.5391 | 471.0041  | 486.7333 | 331.5821 | 359.0573 | 370.8248 | 399.2973 | 349.5603 | 284.0876 | 538.2995 | 593.329  | 479.6247  | -0.4104  | 0.009365 | -0.44453 | 0.006227 | 0.18363  | 0.511153 |
| AT3G19350 | MPC       | 1.188904 | 1.784246  | 0        | 0        | 1.324935 | 0        | 0.889303 | 1.07889  | 0.976246 | 0        | 0        | 0         | -0.25123 | NA       | 0.045172 | NA       | -0.49813 | NA       |
| AT3G19360 | AT3G19360 | 52.31177 | 44.60615  | 48.93086 | 55.26369 | 70.22153 | 55.82308 | 62.25124 | 71.20674 | 56.62227 | 45.09817 | 65.18636 | 58.01077  | 0.289711 | 0.315646 | 0.352625 | 0.243557 | 0.174663 | 0.754476 |
| AT3G19370 | AT3G19370 | 452.9724 | 342.5581  | 352.9679 | 134.0351 | 139.1181 | 144.5419 | 159.1853 | 155.3602 | 174.748  | 335.8375 | 344.5565 | 347.0287  | -1.13682 | 7.04E-16 | -1.35826 | 5.83E-11 | -0.08957 | 0.819722 |
| AT3G19380 | PUB25     | 173.58   | 146.3082  | 151.9432 | 95.68041 | 94.73282 | 89.71567 | 90.70896 | 99.25787 | 135.6982 | 110.3466 | 142.3457 | 102.5547  | -0.73142 | 0.000387 | -0.52458 | 0.018502 | -0.41086 | 0.209639 |
| AT3G19390 | AT3G19400 | 3.566712 | 5.352738  | 1.287654 | 15.67179 | 4.637271 | 12.95893 | 15.11816 | 14.02557 | 18.54867 | 3.838143 | 1.330334 | 2.071183  | 1.24464  | 0.028332 | 1.656486 | 0.00321  | -0.24099 | NA       |
| AT3G19400 | AT3G19400 | 347.16   | 340.791   | 347.6667 | 308.0744 | 367.0069 | 356.869  | 254.3408 | 240.5925 | 283.1113 | 354.0686 | 347.2172 | 321.131   | -0.01086 | 0.955748 | -0.40682 | 0.006356 | -0.01915 | 0.960974 |
| AT3G19410 | AT3G19410 | 0        | 0         | 0        | 0        | 0        | 0        | 0        | 0        | 0        | 0        | 0        | 0         | #N/A     | #N/A     | #N/A     | #N/A     | #N/A     | #N/A     |
| AT3G19420 | ATPEN2    | 1034.346 | 942.0819  | 909.084  | 853.7002 | 820.1345 | 899.1504 | 894.6393 | 980.711  | 824.9279 | 816.5648 | 937.8854 | 837.0125  | -0.1659  | 0.212786 | -0.09635 | 0.525116 | -0.15636 | 0.469433 |
| AT3G19430 | AT3G19430 | 1.188904 | 0         | 1.287654 | 0.412416 | 0.662467 | 1.993682 | 1.778607 | 0        | 1.952492 | 0.995356 | 1.330334 | 1.035907  | -0.00833 | 0.992179 | 0.174948 | 0.829999 | 0.089626 | 0.715153 |
| AT3G19440 | AT3G19440 | 45.17835 | 39.25341  | 46.35556 | 47.42779 | 60.94699 | 41.86731 | 40.01866 | 40.99782 | 36.1211  | 46.05771 | 29.26735 | 31.0772   | 0.190867 | 0.574807 | -0.15846 | 0.682329 | -0.27197 | 0.637513 |
| AT3G19450 | CAD4      | 652.7083 | 661.9553  | 630.9506 | 570.7832 | 561.1098 | 420.6668 | 361.9465 | 352.797  | 539.864  | 617.9409 | 554.7493 | 596.6822  | -0.31382 | 0.113864 | -0.61763 | 0.001093 | -0.13263 | 0.726823 |
| AT3G19460 | RTNLB11   | 171.2022 | 185.5166  | 173.8333 | 256.9349 | 307.3848 | 258.1818 | 304.1418 | 248.1447 | 301.66   | 177.5141 | 171.6131 | 169.8882  | 0.625286 | 8.26E-05 | 0.680399 | 2.56E-05 | -0.0273  | 0.952771 |
| AT3G19470 | AT3G19470 | 39.23383 | 32.11643  | 42.49259 | 47.84021 | 39.74804 | 27.91154 | 25.7898  | 28.05114 | 14.64369 | 32.62421 | 27.93701 | 36.25673  | 0.042462 | 0.923494 | -0.68494 | 0.064679 | -0.21918 | 0.753042 |
| AT3G19480 | PGDH3     | 343.5932 | 314.0273  | 337.3654 | 169.5028 | 202.0525 | 189.3997 | 276.5734 | 307.4836 | 245.0377 | 361.7449 | 371.1632 | 331.4901  | -0.82341 | 9.23E-09 | -0.26362 | 0.113494 | 0.091997 | 0.799636 |
| AT3G19490 | ATNH11    | 649.1416 | 578.0957  | 567.8556 | 514.6946 | 584.2961 | 626.016  | 602.9478 | 669.9907 | 578.9139 | 624.6577 | 521.4909 | 595.6463  | -0.0628  | 0.720739 | 0.041939 | 0.829615 | -0.04207 | 0.900606 |
| AT3G19500 | BHLH113   | 7.133424 | 8.92123   | 6.438272 | 10.31039 | 6.624673 | 6.977885 | 6.252124 | 6.47334  | 12.6612  | 9.593536 | 2.666068 | 7.251346  | 0.111815 | 0.021587 | 0.149961 | 0.83907  | -0.10506 | NA       |
| AT3G19505 | AT3G19508 | 9.511232 | 16.05821  | 7.725926 | 31.756   | 32.4609  | 16.94629 | 33.79533 | 11.86779 | 47.86305 | 9.716749 | 9.782004 | 13.46678  | 1.104411 | 0.072682 | 1.265125 | 0.010096 | -0.16379 | 0.889862 |
| AT3G19510 | HAT3.1    | 184.2801 | 162.3664  | 157.0938 | 145.9951 | 146.4053 | 155.5072 | 177.8607 | 169.3857 | 140.5794 | 157.3638 | 164.9614 | 142.9551  | -0.17383 | 0.372196 | -0.04827 | 0.843245 | -0.11876 | 0.74422  |
| AT3G19515 | AT3G19515 | 319.8152 | 342.5572  | 392.7344 | 227.241  | 178.2037 | 214.3208 | 278.352  | 335.5348 | 229.4178 | 368.6417 | 411.0732 | 399.8599  | -0.75001 | 1.41E-05 | -0.31849 | 0.105413 | 0.156311 | 0.644845 |
| AT3G19520 | AT3G19520 | 328.1375 | 419.2978  | 373.4198 | 525.8299 | 584.9586 | 509.3856 | 571.8221 | 494.1316 | 477.3843 | 452.9008 | 452.3135 | 378.1059  | 0.530475 | 0.000363 | 0.461393 | 0.002984 | 0.197127 | 0.467997 |
| AT3G19530 | AT3G19530 | 0        | 0         | 0        | 0        | 0        | 0        | 0        | 0        | 0        | 0        | 0        | 0         | #N/A     | #N/A     | #N/A     | #N/A     | #N/A     | #N/A     |
| AT3G19540 | AT3G19540 | 262.7478 | 194.4828  | 198.2988 | 270.5446 | 271.6116 | 316.9954 | 246.3371 | 305.3259 | 257.7289 | 128.5778 | 139.6851 | 164.7091  | 0.370691 | 0.048295 | 0.288541 | 0.160513 | -0.59071 | 0.015721 |
| AT3G19550 | AT3G19550 | 34.47821 | 14.27397  | 42.49259 | 23.9201  | 19.21155 | 17.94313 | 9.782338 | 10.7889  | 18.54867 | 44.13864 | 35.91902 | 18.64632  | -0.52255 | 0.242214 | -1.07858 | 0.015194 | 0.076396 | 0.942682 |
| AT3G19555 | AT3G19553 | 808.4547 | 1086.606  | 869.1667 | 569.5459 | 584.2961 | 729.6874 | 815.4913 | 786.5108 | 658.966  | 738.8424 | 731.6837 | 738.6014  | -0.54471 | 0.000548 | -0.28152 | 0.110786 | -0.31445 | 0.200315 |
| AT3G19560 | AT3G19560 | 0        | 0         | 0        | 0        | 0        | 0        | 1.07889  | 0.976246 | 0        | 0        | 0        | 0         | 0        | NA       | 0.333168 | NA       | 0        | NA       |
| AT3G19570 | SC03      | 146.2352 | 155.2294  | 126.1901 | 108.4653 | 95.39529 | 113.6398 | 180.5126 | 106.8101 | 86.85899 | 112.2657 | 102.4357 | 116.0215  | -0.41709 | 0.029766 | -0.53097 | 0.007892 | -0.35205 | 0.244959 |
| AT3G19580 | AZF2      | 53.50068 | 53.52738  | 60.51975 | 110.115  | 124.5438 | 131.5583 | 180.5286 | 159.6757 | 132.7695 | 51.81492 | 42.57069 | 40.40035  | 1.076812 | 9.48E-07 | 1.463174 | 2.37E-11 | -0.29637 | 0.521925 |
| AT3G19590 | BUB3.1    | 101.0568 | 117.7602  | 112.0259 | 124.9619 | 146.4053 | 114.6367 | 117      |          |          |          |          |           |          |          |          |          |          |          |







|           |           |          |          |          |          |          |          |          |          |          |          |          |          |           |          |           |          |          |          |
|-----------|-----------|----------|----------|----------|----------|----------|----------|----------|----------|----------|----------|----------|----------|-----------|----------|-----------|----------|----------|----------|
| AT3G21830 | ASK8      | 0        | 0        | 0        | 0.824831 | 0        | 0.996841 | 0.889303 | 0        | 0.976246 | 0.959536 | 0        | 0        | 0.326419  | NA       | 0.330505  | NA       | 0.17148  | NA       |
| AT3G21840 | ASK7      | 0        | 0        | 0        | 1.237247 | 2.649869 | 0.996841 | 2.66791  | 0        | 0        | 0        | 0        | 1.035907 | 0.736892  | NA       | 0.419542  | NA       | 0.14966  | NA       |
| AT3G21850 | ASK9      | 0        | 0        | 0        | 0.824831 | 0        | 1.93682  | 0        | 0        | 0        | 0.959536 | 0        | 1.035907 | 0.478932  | NA       | 0         | NA       | 0.350903 | NA       |
| AT3G21860 | ASK10     | 0        | 0        | 0        | 1.237247 | 0.662467 | 0        | 0        | 1.07889  | 0        | 0        | 0        | 0        | 0.354932  | NA       | 0.164413  | NA       | 0        | 0.87267  |
| AT3G21865 | PEX22     | 288.9037 | 344.3595 | 361.8309 | 488.7125 | 490.8882 | 485.4615 | 444.6517 | 498.4472 | 529.1253 | 306.0919 | 278.0398 | 367.7468 | 0.552709  | 0.000231 | 0.558543  | 0.000273 | -0.05693 | 0.878267 |
| AT3G21870 | CYCU1-1   | 32.10041 | 21.41095 | 42.49259 | 27.21943 | 25.17376 | 15.94945 | 33.79353 | 17.26224 | 22.45366 | 26.867   | 21.28534 | 40.40035 | -0.43255  | 0.298582 | -0.35376  | 0.443819 | -0.11273 | 0.900456 |
| AT3G21880 | COLI2     | 0        | 0        | 0        | 0.662467 | 0        | 0        | 0        | 0        | 0        | 0        | 1.330334 | 0        | 0.101524  | NA       | 0         | NA       | 0.179327 | NA       |
| AT3G21890 | AT3G21890 | 9.511232 | 10.70548 | 6.438272 | 13.1973  | 15.89921 | 7.974726 | 6.225124 | 1.07889  | 2.928738 | 12.47396 | 5.321336 | 10.35907 | 0.446182  | 0.446277 | -0.93052  | 0.123537 | 0.104284 | NA       |
| AT3G21900 | CRSP16    | 0        | 0        | 0        | 0        | 0        | 0        | 0        | 0        | 0        | 0        | 0        | 0        | #N/A      | #N/A     | #N/A      | #N/A     | #N/A     | #N/A     |
| AT3G21910 | CRSP17    | 0        | 0        | 0        | 0        | 0        | 0        | 0        | 0        | 0        | 0        | 0        | 0        | #N/A      | #N/A     | #N/A      | #N/A     | #N/A     | #N/A     |
| AT3G21920 | CRSP18    | 0        | 0        | 0        | 0        | 0        | 0        | 0        | 0        | 0        | 0        | 0        | 1.035907 | 0         | NA       | 0         | NA       | 0.172362 | NA       |
| AT3G21930 | CRSP19    | 1.188904 | 0        | 0        | 0        | 0        | 0        | 0.889303 | 0        | 0        | 0        | 0        | 0        | -0.20902  | NA       | -0.03919  | NA       | -0.19148 | NA       |
| AT3G21933 | AT3G21933 | 0        | 0        | 0        | 0.412416 | 0        | 0        | 0        | 0        | 0        | 0        | 0        | 0        | 0.095918  | NA       | 0         | NA       | 0        | NA       |
| AT3G21937 | AT3G21937 | 0        | 0        | 0        | 0        | 0        | 0        | 0        | 0        | 0        | 0        | 1.330334 | 0        | 0         | NA       | 0         | NA       | 0.172362 | NA       |
| AT3G21940 | CRSP22    | 0        | 0        | 0        | 0.662467 | 0.996841 | 0        | 0        | 0        | 0        | 0        | 0        | 0        | 0.262313  | NA       | 0         | NA       | 0        | NA       |
| AT3G21945 | AT3G21945 | 0        | 0        | 0        | 0        | 0        | 0        | 0        | 0        | 0        | 0        | 0        | 0        | #N/A      | #N/A     | #N/A      | #N/A     | #N/A     | #N/A     |
| AT3G21950 | AT3G21950 | 142.6685 | 135.6027 | 149.3679 | 35.05532 | 31.79843 | 31.8989  | 35.57214 | 29.13003 | 32.21612 | 160.2424 | 196.8894 | 117.0574 | -0.202302 | 3.03E-19 | -2.04107  | 1.49E-17 | 0.137894 | 0.769636 |
| AT3G21960 | CRSP24    | 0        | 0        | 0        | 0        | 0        | 0        | 0.889303 | 0        | 0.976246 | 0        | 0        | 0        | 0         | NA       | 0         | NA       | 0        | NA       |
| AT3G21965 | AT3G21965 | 0        | 0        | 0        | 0        | 0        | 0        | 0        | 0        | 0        | 0        | 0        | 0        | #N/A      | #N/A     | #N/A      | #N/A     | #N/A     | #N/A     |
| AT3G21970 | CRSP26    | 0        | 0        | 0        | 0        | 0        | 0        | 0.889303 | 0        | 0        | 0        | 0        | 0        | 0         | NA       | 0.160764  | NA       | 0        | NA       |
| AT3G21980 | AT3G21980 | 0        | 0        | 0        | 0        | 0        | 0        | 0        | 0        | 0        | 0        | 0        | 0        | #N/A      | #N/A     | #N/A      | #N/A     | #N/A     | #N/A     |
| AT3G21985 | AT3G21985 | 0        | 3.568492 | 0        | 0.662467 | 0        | 0        | 0        | 0        | 0        | 0        | 0        | 0        | -0.33256  | NA       | -0.44761  | NA       | -0.44051 | NA       |
| AT3G21990 | CRSP29    | 0        | 1.784246 | 0        | 0        | 0        | 0        | 0        | 0        | 0        | 0        | 0        | 0        | -0.2184   | NA       | -0.20558  | NA       | -0.19918 | NA       |
| AT3G22000 | CRSP30    | 0        | 0        | 0        | 0        | 0        | 0        | 0        | 0        | 0        | 0.959536 | 1.330334 | 0        | 0         | NA       | 0         | NA       | 0.366448 | NA       |
| AT3G22010 | CRSP31    | 0        | 0        | 0        | 0        | 0        | 0        | 0        | 0        | 0.976246 | 0        | 0        | 1.035907 | 0         | NA       | 0.14724   | NA       | 0.156349 | NA       |
| AT3G22020 | AT3G22020 | 0        | 0        | 0        | 0        | 0        | 0        | 0        | 0        | 0        | 0        | 0        | 0        | #N/A      | #N/A     | #N/A      | #N/A     | #N/A     | #N/A     |
| AT3G22022 | AT3G22022 | 0        | 0        | 0        | 0        | 0        | 0        | 0        | 0        | 0        | 0        | 0        | 0        | #N/A      | #N/A     | #N/A      | #N/A     | #N/A     | #N/A     |
| AT3G22030 | AT3G22030 | 0        | 0        | 0        | 0        | 0        | 0        | 0        | 0        | 0        | 0        | 0        | 1.035907 | 0         | NA       | 0         | NA       | 0.172362 | NA       |
| AT3G22040 | CRSP34    | 0        | 1.784246 | 0        | 0.412416 | 0        | 0        | 1.07889  | 0        | 0        | 0        | 0        | 0        | -0.17692  | NA       | -0.06876  | NA       | -0.25664 | NA       |
| AT3G22050 | CRSP35    | 0        | 0        | 0        | 0        | 0        | 0        | 0.889303 | 0        | 0        | 0        | 0        | 0        | 0         | NA       | 0.160764  | NA       | 0        | NA       |
| AT3G22053 | AT3G22053 | 0        | 0        | 0        | 0.662467 | 0        | 0.889303 | 0        | 0        | 0        | 0        | 0        | 0        | 0.097058  | NA       | 0.130384  | NA       | 0        | NA       |
| AT3G22057 | AT3G22057 | 0        | 0        | 0        | 0        | 0        | 0        | 0        | 0        | 0        | 0        | 0        | 0        | #N/A      | #N/A     | #N/A      | #N/A     | #N/A     | #N/A     |
| AT3G22060 | CRSP38    | 237.7808 | 267.6369 | 231.7778 | 512.6326 | 571.7093 | 523.3414 | 343.2711 | 279.4325 | 397.3321 | 165.0401 | 145.0064 | 175.0682 | 1.110867  | 6.57E-13 | 0.466131  | 0.007317 | -0.58116 | 0.00894  |
| AT3G22070 | AT3G22070 | 2.377808 | 5.352738 | 6.438272 | 5.361402 | 1.324935 | 5.981045 | 1.778607 | 3.23667  | 1.952492 | 1.919071 | 3.991002 | 4.143626 | -0.07418  | 0.928863 | -0.60027  | 0.414799 | -0.30309 | NA       |
| AT3G22072 | AT3G22072 | 0        | 0        | 0        | 0        | 0        | 0        | 0        | 0        | 0        | 0        | 0        | 0        | 0         | NA       | 0         | NA       | 0.172362 | NA       |
| AT3G22080 | AT3G22080 | 0        | 0        | 0        | 0        | 0        | 0        | 0        | 0        | 0        | 0        | 0        | 0        | #N/A      | #N/A     | #N/A      | #N/A     | #N/A     | #N/A     |
| AT3G22090 | AT3G22090 | 0        | 1.784246 | 0        | 0        | 0        | 0        | 0        | 0        | 0.959536 | 0        | 1.035907 | 0        | -0.31953  | NA       | -0.28588  | NA       | 0.1084   | NA       |
| AT3G22100 | BHLH117   | 1.188904 | 1.784246 | 0        | 0        | 2.649869 | 0        | 1.07889  | 0.976246 | 1.919071 | 1.330334 | 0        | 0        | -0.02511  | 0.973694 | -0.11895  | 0.875381 | 0.0551   | NA       |
| AT3G22104 | AT3G22104 | 403.0384 | 372.9074 | 421.063  | 257.3473 | 288.1733 | 271.1407 | 360.1679 | 330.1403 | 273.3489 | 410.6812 | 448.3225 | 439.2244 | -0.54902  | 0.000116 | -0.31038  | 0.049275 | 0.111489 | 0.70062  |
| AT3G22110 | PAC1      | 1034.346 | 1234.698 | 1143.437 | 1466.962 | 1415.693 | 1324.801 | 1132.083 | 1146.86  | 1244.714 | 1189.824 | 1134.775 | 995.5062 | 0.302908  | 0.014348 | 0.048116  | 0.773127 | -0.03692 | 0.900032 |
| AT3G22120 | CWLP      | 1222.193 | 667.308  | 597.4716 | 902.7777 | 1301.086 | 933.043  | 780.8085 | 720.6985 | 1024.082 | 335.8375 | 435.0192 | 487.912  | 0.317888  | 0.280264 | 0.01958   | 0.959457 | -0.93675 | 0.003959 |
| AT3G22121 | AT3G22121 | 0        | 0        | 0        | 0        | 0        | 0        | 0        | 0        | 0        | 0        | 0        | 0        | #N/A      | #N/A     | #N/A      | #N/A     | #N/A     | #N/A     |
| AT3G22133 | AT3G22133 | 0        | 0        | 0        | 0        | 0        | 0.996841 | 0        | 0        | 0        | 0        | 0        | 0        | 0.15625   | NA       | 0         | NA       | 0        | NA       |
| AT3G22136 | AT3G22136 | 0        | 0        | 0        | 0        | 0        | 0        | 0        | 0        | 0        | 0        | 0        | 0        | #N/A      | #N/A     | #N/A      | #N/A     | #N/A     | #N/A     |
| AT3G22142 | AT3G22142 | 460.1058 | 171.2876 | 189.2852 | 48.25262 | 54.32232 | 65.79149 | 69.36567 | 71.20674 | 33.19236 | 203.4216 | 234.1388 | 96.33931 | -1.91991  | 1.77E-05 | -1.87617  | 3.52E-05 | -0.53228 | 0.51943  |
| AT3G22150 | PCMP-E95  | 405.4162 | 422.8663 | 399.1728 | 240.8507 | 228.5512 | 293.0712 | 456.2127 | 523.2616 | 364.1398 | 478.8083 | 460.2956 | 453.7271 | -0.68081  | 0.000116 | -0.128482 | 0.528492 | 0.110833 | 0.547432 |
| AT3G22160 | VQ22      | 11.88904 | 10.70548 | 7.725926 | 94.03075 | 95.39529 | 98.68724 | 72.03358 | 61.49673 | 95.77809 | 7.676285 | 7.982004 | 9.323159 | 2.944855  | 5.18E-19 | 2.64692   | 4.33E-15 | -0.24516 | 0.788699 |
| AT3G22170 | FHY3      | 607.5299 | 597.7224 | 553.6914 | 466.8544 | 356.4074 | 519.354  | 532.6928 | 613.8884 | 382.6808 | 538.2995 | 576.0346 | 55.964   | -0.38201  | 0.056652 | -0.19739  | 0.392276 | -0.05613 | 0.903463 |
| AT3G22180 | PAT20     | 95.11232 | 133.8185 | 95.28642 | 118.7757 | 115.2693 | 125.6019 | 151.1816 | 131.6246 | 103.4821 | 94.03449 | 93.12338 | 99.44703 | 0.160247  | 0.519228 | 0.265174  | 0.284477 | -0.1537  | 0.732845 |
| AT3G22183 | AT3G22183 | 0        | 0        | 0        | 0        | 0        | 0        | 0        | 0        | 0        | 0        | 0        | 0        | #N/A      | #N/A     | #N/A      | #N/A     | #N/A     | #N/A     |
| AT3G22190 | IDQ5      | 170.0133 | 158.7979 | 149.3679 | 152.5938 | 152.3675 | 204.3524 | 197.4254 | 215.778  | 171.8193 | 161.202  | 178.2648 | 149.1705 | 0.073872  | 0.758298 | 0.281941  | 0.18822  | 0.025411 | 0.961391 |
| AT3G22200 | POP2      | 445.839  | 454.9827 | 460.9803 | 457.3689 | 387.5434 | 469.512  | 630.5162 | 692.6473 | 491.0517 | 431.791  | 304.6465 | 504.7432 | -0.05021  | 0.854057 | 0.402219  | 0.071252 | -0.08631 | 0.856842 |
| AT3G22210 | AT3G22210 | 61.6909  | 124.8972 | 144.2173 | 178.1635 | 235.1759 | 137.564  | 251.6729 | 196.358  | 550.6027 | 152.5662 | 151.6581 | 269.3357 | 0.307051  | 0.53242  | 1.060609  | 0.013521 | 0.357511 | 0.654429 |
| AT3G22220 | AT3G22220 | 252.0476 | 294.4006 | 253.6679 | 210.7444 | 235.1759 | 256.1881 | 258.7873 | 257.8547 | 188.4155 | 252.3579 | 282.0308 | 252.7612 | -0.18662  | 0.336081 | -0.17365  | 0.408691 | -0.02026 | 0.965712 |
| AT3G22230 | RPL27B    | 620.6079 | 599.5067 | 651.5531 | 1020.729 | 1001.651 | 616.0476 | 779.9192 | 538.3661 | 1390.174 | 666.8773 | 783.5667 | 963.3931 | 0.468074  | 0.129867 | 0.502605  | 0.11511  | 0.345453 | 0.502868 |
| AT3G22231 | PC1       | 520.7399 | 440.7088 | 522.7877 | 1644.713 | 2025.162 | 1476.321 | 255.2301 | 162.9124 | 342.6623 | 295.537  | 377.8148 | 234.1149 | 1.72503   | 3.21E-14 | -0.92284  | 0.000174 | -0.68414 | 0.038744 |
| AT3G22232 | AT3G22232 | 0        | 0        | 0        | 0        | 0        | 0        | 0        | 0        | 0        | 0        | 0        | 0        | #N/A      | #N/A     | #N/A      | #N/A     | #N/A     | #N/A     |
| AT3G22234 | AT3G22234 | 0        | 0        | 0        | 4.124156 | 1.324935 | 5.981045 | 2.66791  | 1.07889  | 1.952492 | 0        | 1.330334 | 1.035907 | 1.411413  | 0.022545 | 0.81768   | 0.231736 | 0.318665 | NA       |
| AT3G22235 | AT3G22235 | 306.7372 | 278.3424 | 256.2432 | 1122.183 | 1176.542 | 863.2641 | 119.1667 | 105.7312 | 276.2776 | 118.0229 | 138.3547 | 139.8474 | 1.814739  | 6.27E-12 | -0.70415  | 0.019208 | -1.02247 | 0.003816 |
| AT3G22237 | AT3G22237 | 0        | 0        | 0        | 0        | 0        | 0        | 0        | 0        | 0        | 0        | 0        | 0        | #N/A      | #N/A     | #N/A      | #N/A     | #N/A     | #N/A     |
| AT3G22238 | AT3G22238 | 1.188904 | 0        | 0        | 3.71174  | 1.987402 | 1.993682 | 1.778607 | 0        | 0        | 0        | 0        | 1.035907 | 0.894543  | 0.147231 | 0.06068   | 0.93946  | -0.06895 | NA       |
| AT3G22240 | AT3G22240 | 115.3237 | 98.13353 | 137.779  | 501.9098 | 637.2935 | 367.8342 | 78.25871 | 45.31338 | 155.2231 | 46.05771 | 61.19536 | 67.33392 | 1.953251  | 3.71E-10 | -0.30798  | 0.455172 | -0.92301 | 0.04782  |
| AT3G22250 | UGT82A1   | 0        | 0        | 0        | 0        | 0        | 0        | 0        | 0        | 0        | 0        | 0        | 0        | #N/A      | #N/A     | #N/A      | #N/A     | #N/A     | #N/A     |
| AT3G22260 | AT3G22260 | 70.14533 | 76.72258 | 78.54691 | 163.3166 | 147.0677 | 160.4914 | 126.2811 |          |          |          |          |          |           |          |           |          |          |          |

|           |           |          |          |          |          |          |          |          |          |          |          |          |          |          |          |           |          |           |          |
|-----------|-----------|----------|----------|----------|----------|----------|----------|----------|----------|----------|----------|----------|----------|----------|----------|-----------|----------|-----------|----------|
| AT3G22630 | PBD1      | 184.2801 | 233.7362 | 251.0926 | 348.9036 | 339.1832 | 296.0617 | 273.0162 | 282.6692 | 400.2609 | 168.8783 | 142.3457 | 214.4327 | 0.546379 | 0.010679 | 0.502378  | 0.024915 | -0.32949  | 0.360955 |
| AT3G22640 | PAP85     | 2.377808 | 1.784246 | 0        | 1.649662 | 0.662467 | 1.993682 | 0.889303 | 5.39445  | 0        | 0        | 0        | 0        | 0.038498 | 0.962645 | 0.245024  | 0.754934 | -0.63194  | NA       |
| AT3G22650 | AT5FL61   | 0        | 0        | 0        | 0        | 0.662467 | 0        | 1.778607 | 0        | 0.976246 | 0        | 0        | 0        | 0.097496 | NA       | 0.455475  | NA       | 0         | NA       |
| AT3G22660 | AT3G22660 | 244.9142 | 233.7362 | 231.7778 | 226.8286 | 241.8006 | 237.2481 | 148.5137 | 200.6735 | 274.3251 | 194.7857 | 158.3097 | 209.2531 | -0.01022 | 0.971985 | -0.185    | 0.480347 | -0.3233   | 0.365742 |
| AT3G22670 | AT3G22670 | 43.98945 | 32.11643 | 46.35556 | 18.5887  | 24.51129 | 18.93997 | 13.33995 | 29.13003 | 24.40615 | 38.38143 | 29.26735 | 36.25673 | -0.9237  | 0.005821 | -0.83205  | 0.021068 | -0.22416  | 0.744093 |
| AT3G22680 | RD1       | 110.5811 | 98.13353 | 104.33   | 134.0351 | 154.3549 | 113.6398 | 118.2774 | 101.4157 | 110.3158 | 116.1038 | 118.3997 | 93.23159 | 0.354675 | 0.059015 | 0.071008  | 0.804741 | -0.55696  | 0.914481 |
| AT3G22690 | PCMP-H56  | 52.31177 | 26.76369 | 30.9037  | 28.04426 | 23.84882 | 32.89575 | 28.45771 | 34.52448 | 20.50117 | 24.94793 | 19.95501 | 33.14901 | -0.37789 | 0.325154 | -0.39079  | 0.346699 | -0.46306  | 0.455485 |
| AT3G22700 | AT3G22700 | 0        | 0        | 0        | 0.824831 | 0.662467 | 0        | 0.889303 | 0        | 0        | 0        | 0        | 0        | 0.28583  | NA       | 0.151646  | NA       | 0         | NA       |
| AT3G22710 | AT3G22710 | 0        | 0        | 0        | 0.412416 | 0        | 0        | 0        | 0        | 0        | 0        | 0        | 0        | 0.065109 | NA       | 0         | NA       | 0         | 1.50531  |
| AT3G22720 | AT3G22720 | 0        | 0        | 0        | 0        | 0        | 0        | 0        | 0        | 0        | 0        | 0        | 0        | #N/A     | #N/A     | #N/A      | #N/A     | #N/A      | #N/A     |
| AT3G22730 | AT3G22730 | 0        | 0        | 0        | 0        | 0        | 0        | 0        | 0        | 0        | 0        | 0        | 0        | 0        | NA       | 0         | NA       | 0         | 1.72362  |
| AT3G22730 | AT3G22730 | 0        | 0        | 0        | 0        | 0        | 0        | 0.889303 | 0        | 0        | 0        | 1.330334 | 0        | 0        | NA       | 0.141773  | NA       | 0         | 1.83636  |
| AT3G22740 | HMT3      | 148.613  | 139.1712 | 137.779  | 173.2145 | 164.2919 | 129.5893 | 176.0821 | 213.6202 | 193.2967 | 197.6643 | 154.3187 | 178.1759 | 0.141839 | 0.521265 | 0.439162  | 0.026979 | 0.313234  | 0.307529 |
| AT3G22750 | AT3G22750 | 177.1467 | 201.6198 | 166.1074 | 94.03075 | 131.831  | 95.69671 | 136.6304 | 103.5734 | 158.1519 | 174.6355 | 155.6491 | 196.8222 | -0.73287 | 0.000549 | -0.43177  | 0.065531 | -0.03782  | 0.947063 |
| AT3G22760 | TCX3      | 140.2907 | 137.3869 | 137.779  | 95.268   | 100.0326 | 115.6335 | 242.7799 | 118.6779 | 72.2422  | 159.2829 | 139.6851 | 152.2783 | -0.41726 | 0.055669 | -0.42241  | 0.068636 | 0.118914  | 0.791193 |
| AT3G22770 | AT3G22770 | 0        | 0        | 1.287654 | 1.237247 | 0.662467 | 0.996841 | 0        | 0        | 0        | 0        | 0        | 0        | 0.31759  | NA       | -0.28362  | NA       | -0.05179  | NA       |
| AT3G22780 | TSO1      | 428.0054 | 396.1026 | 394.0222 | 254.8728 | 241.8006 | 313.008  | 277.4627 | 318.2725 | 184.5105 | 421.2361 | 385.7969 | 419.5211 | -0.58075 | 0.00268  | -0.62853  | 0.001461 | 0.010074  | 0.986297 |
| AT3G22790 | NET1A     | 650.3305 | 392.5341 | 418.4877 | 181.8753 | 170.2541 | 226.2829 | 210.7649 | 267.5647 | 179.6293 | 500.8776 | 545.4369 | 471.3375 | -1.30358 | 3.91E-10 | -1.11944  | 1.44E-07 | 0.048298  | 0.930805 |
| AT3G22800 | LRX6      | 2.377808 | 0        | 2.575309 | 0.824831 | 1.987401 | 0.996841 | 0.889303 | 2.15778  | 1.952492 | 3.838143 | 1.330334 | 5.179533 | -0.2606  | 0.742654 | -0.0603   | 0.946295 | 0.542549  | NA       |
| AT3G22810 | AT3G22810 | 29.72266 | 39.25341 | 34.76667 | 29.28151 | 24.51129 | 35.88627 | 30.23632 | 47.47116 | 22.45366 | 47.97678 | 41.24035 | 51.79533 | -0.20046 | 0.610199 | -0.04488  | 0.925246 | -0.33176  | 0.442265 |
| AT3G22820 | EPFL5     | 0        | 7.136984 | 0        | 5.361402 | 2.649869 | 4.984204 | 1.778607 | 2.15778  | 1.952492 | 2.878607 | 3.991002 | 4.134266 | 0.631471 | 0.36714  | -0.04865  | 0.956991 | 0.142072  | NA       |
| AT3G22830 | HSFA68    | 0        | 0        | 0        | 1.237247 | 0.662467 | 2.990522 | 4.465157 | 3.23667  | 6.833722 | 0        | 0        | 0        | 0.688848 | 0.305267 | 1.678559  | 0.065977 | 0.424377  | NA       |
| AT3G22840 | ELP1      | 17.83356 | 23.1952  | 18.02716 | 17.32145 | 15.89921 | 7.974726 | 5.358821 | 4.31556  | 4.88123  | 19.19071 | 14.63367 | 10.35907 | -0.38113 | 0.43991  | -1.60056  | 0.000814 | -0.34082  | NA       |
| AT3G22845 | AT3G22845 | 351.9156 | 422.8663 | 404.3235 | 941.1323 | 880.419  | 686.8233 | 658.0846 | 572.8906 | 770.2581 | 506.6348 | 532.1336 | 464.0861 | 1.074397 | 2.29E-11 | 0.751457  | 7.25E-06 | 0.344535  | 0.19322  |
| AT3G22850 | 173.58    | 135.6027 | 159.6691 | 279.2053 | 274.2615 | 244.226  | 242.7799 | 219.0147 | 263.5864 | 222.6123 | 254.0938 | 217.5403 | 0        | 0.746342 | 2.63E-06 | 0.607012  | 0.000292 | 0.539201  | 0.012475 |
| AT3G22860 | TIF3C2    | 0        | 0        | 0        | 0        | 0.662467 | 0        | 1.778607 | 0        | 0.976246 | 1.919071 | 0        | 0        | 0.053426 | NA       | 0.465467  | NA       | 0.497049  | NA       |
| AT3G22870 | AT3G22870 | 0        | 0        | 0        | 0        | 0        | 0        | 0        | 0        | 0        | 0        | 0        | 0        | #N/A     | #N/A     | #N/A      | #N/A     | #N/A      | #N/A     |
| AT3G22880 | DMC1      | 58.25629 | 46.3904  | 48.93086 | 76.7093  | 74.19633 | 58.81361 | 60.47264 | 44.23449 | 40.02609 | 57.57214 | 43.91012 | 63.1903  | 0.434468 | 0.123124 | -0.08551  | 0.824121 | 0.095878  | 0.882004 |
| AT3G22886 | MIR167A   | 3.566712 | 3.568492 | 1.287654 | 7.011065 | 10.59948 | 7.974726 | 3.570714 | 4.31556  | 10.73871 | 5.757214 | 9.312338 | 6.215439 | 1.069562 | 0.070268 | 0.707724  | 0.294032 | 0.832071  | NA       |
| AT3G22890 | APS1      | 4952.974 | 3853.971 | 3861.675 | 2702.559 | 2296.112 | 2793.148 | 2779.073 | 3360.742 | 3500.818 | 4218.119 | 3895.218 | 3552.123 | -0.69098 | 3.4E-06  | -0.38857  | 0.015828 | -0.11758  | 0.701627 |
| AT3G22900 | NRDP7     | 24.96698 | 21.41095 | 11.58889 | 23.9201  | 32.4609  | 25.91786 | 21.34328 | 16.18335 | 28.31113 | 27.82653 | 19.95501 | 24.86176 | 0.453869 | 0.269755 | 0.167419  | 0.746037 | 0.302457  | 0.691704 |
| AT3G22910 | ACA13     | 23.77808 | 24.97944 | 16.73951 | 120.8378 | 119.9066 | 149.5261 | 176.0821 | 186.648  | 134.7219 | 27.82653 | 25.27635 | 17.61041 | 2.41799  | 2.23E-19 | 2.764366  | 5.28E-25 | 0.096671  | 0.911082 |
| AT3G22920 | CYP26-1   | 0        | 0        | 0        | 1.237247 | 0.662467 | 0.996841 | 0.889303 | 0        | 0        | 0        | 0        | 0        | 0.561354 | NA       | 0.161554  | NA       | 0         | NA       |
| AT3G22930 | CM1L1     | 4.755616 | 7.136984 | 6.438272 | 48.25262 | 49.68505 | 36.88311 | 43.57587 | 30.20892 | 60.52725 | 18.23118 | 13.30334 | 6.215439 | 2.408773 | 5.92E-09 | 2.389919  | 1.22E-08 | 0.756299  | 0.319262 |
| AT3G22937 | AT3G22937 | 0        | 0        | 2.575309 | 0        | 0        | 0.996841 | 0        | 1.07889  | 0        | 0        | 0        | 0        | -0.24328 | NA       | -0.20989  | NA       | -0.37801  | NA       |
| AT3G22940 | AT3G22940 | 0        | 0        | 0        | 0        | 0        | 0        | 0.889303 | 0        | 0        | 0        | 0        | 0        | 0        | NA       | 0.160764  | NA       | 0         | NA       |
| AT3G22942 | GG2       | 28.53369 | 28.54794 | 20.60247 | 51.55195 | 69.55906 | 46.85152 | 48.91169 | 36.68226 | 75.17094 | 24.94793 | 27.93701 | 23.82585 | 1.035413 | 0.001888 | 0.97187   | 0.005317 | -0.02153  | 0.983854 |
| AT3G22945 | AT3G22945 | 0        | 0        | 0        | 0        | 0        | 0        | 0        | 0        | 0        | 0        | 0        | 0        | #N/A     | #N/A     | #N/A      | #N/A     | #N/A      | #N/A     |
| AT3G22950 | ARFC1     | 249.6698 | 256.9314 | 300.0235 | 414.8901 | 451.1402 | 393.7521 | 353.0535 | 367.9015 | 419.7858 | 246.6007 | 284.6915 | 273.4793 | 0.634269 | 9.31E-06 | 0.490596  | 0.001197 | -0.00829  | 0.986011 |
| AT3G22955 | AT3G22955 | 0        | 0        | 0        | 0        | 0        | 0        | 0        | 0        | 0        | 0        | 0        | 0        | #N/A     | #N/A     | #N/A      | #N/A     | #N/A      | #N/A     |
| AT3G22960 | PKP1      | 2443.198 | 2242.797 | 2114.328 | 1500.78  | 1399.793 | 1536.132 | 1614.975 | 1879.426 | 1810.936 | 2302.886 | 2507.68  | 1945.432 | -0.6098  | 1.26E-06 | -0.35479  | 0.008788 | -0.01024  | 0.978296 |
| AT3G22961 | AT3G22961 | 10.70014 | 5.352738 | 6.438272 | 2.474493 | 4.637271 | 3.987363 | 3.557214 | 8.63112  | 7.809968 | 1.919071 | 6.65167  | 6.215439 | -0.78972 | 0.195691 | -0.15235  | 0.845489 | -0.48126  | NA       |
| AT3G22968 | CPuORF59  | 0        | 0        | 0        | 0        | 0        | 0        | 0        | 0        | 0        | 0        | 0        | 0        | #N/A     | #N/A     | #N/A      | #N/A     | #N/A      | #N/A     |
| AT3G22970 | AT3G22970 | 0        | 0        | 0        | 0        | 0        | 0        | 0        | 0        | 0        | 0        | 0        | 0        | #N/A     | #N/A     | #N/A      | #N/A     | #N/A      | #N/A     |
| AT3G22980 | AT3G22980 | 161.6909 | 164.1506 | 105.5877 | 83.30795 | 76.18374 | 97.6904  | 114.7201 | 127.309  | 91.76712 | 100.7512 | 121.0604 | 133.6319 | -0.72375 | 0.001447 | -0.35314  | 0.173355 | -0.26637  | 0.521894 |
| AT3G22990 | IFR       | 237.7808 | 230.1677 | 262.6815 | 279.6178 | 312.6846 | 314.0048 | 298.806  | 291.3003 | 285.0638 | 257.1555 | 292.6735 | 233.079  | 0.298696 | 0.052007 | -0.253725 | 0.128635 | -0.089962 | 0.781547 |
| AT3G23000 | CIKPK     | 1532.497 | 1612.958 | 1649.485 | 1024.44  | 1014.237 | 871.2388 | 802.1517 | 713.1462 | 1061.179 | 1120.738 | 987.1078 | 1239.98  | -0.70619 | 8.52E-06 | -0.87958  | 2.27E-08 | -0.50807  | 0.015721 |
| AT3G23010 | AIRLP36   | 36.85602 | 64.23286 | 55.36914 | 103.5163 | 94.07035 | 131.583  | 104.9378 | 101.4157 | 39.04984 | 25.90746 | 26.60668 | 27.96948 | 1.006299 | 0.002506 | 0.613308  | 0.988581 | -0.84555  | 0.005129 |
| AT3G23020 | AT3G23020 | 71.33424 | 55.31163 | 54.08148 | 34.23049 | 38.4231  | 39.87363 | 38.24005 | 56.10228 | 43.93107 | 42.21957 | 61.19536 | 53.86714 | -0.67121 | 0.104541 | -0.38313  | 0.225292 | -0.2106   | 0.699113 |
| AT3G23030 | IAA2      | 741.8761 | 860.0066 | 988.9185 | 1236.009 | 1362.695 | 1283.931 | 1254.807 | 1147.939 | 1537.587 | 780.1025 | 864.7171 | 947.8545 | 0.574269 | 0.000216 | 0.595596  | 0.000148 | 0.001064  | 0.997973 |
| AT3G23040 | AT3G23040 | 0        | 0        | 0        | 0        | 0        | 0        | 0        | 0        | 0        | 0        | 0        | 0        | #N/A     | #N/A     | #N/A      | #N/A     | #N/A      | #N/A     |
| AT3G23050 | IAA7      | 1575.298 | 1885.948 | 1749.922 | 1582.851 | 1636.294 | 1502.239 | 1057.382 | 1065.943 | 1276.93  | 1524.702 | 1798.612 | 1479.275 | -0.13886 | 0.361488 | -0.6073   | 3.4E-06  | -0.11618  | 0.653508 |
| AT3G23060 | AT3G23060 | 0        | 0        | 0        | 0        | 0        | 0        | 0        | 0        | 0        | 0        | 0        | 0        | #N/A     | #N/A     | #N/A      | #N/A     | #N/A      | #N/A     |
| AT3G23070 | ATCFM3A   | 502.9064 | 449.63   | 419.7753 | 216.5182 | 219.2767 | 206.346  | 269.459  | 339.8503 | 310.4462 | 344.4733 | 332.5835 | 411.2549 | -1.07787 | 6.17E-14 | -0.57217  | 0.000173 | -0.32888  | 0.147272 |
| AT3G23080 | AT3G23080 | 1392.207 | 1543.373 | 1500.117 | 844.2147 | 859.2201 | 767.5674 | 691.8781 | 646.2551 | 606.2488 | 1588.031 | 1705.488 | 1509.316 | -0.83371 | 1.43E-15 | -1.17782  | 0.40E-29 | 0.114332  | 0.580478 |
| AT3G23085 | AT3G23085 | 2.377808 | 1.784246 | 3.862963 | 0.824831 | 0.662467 | 0.99684  |          |          |          |          |          |          |          |          |           |          |           |          |

|           |           |           |          |          |          |          |          |          |          |          |          |          |           |           |           |          |          |           |          |
|-----------|-----------|-----------|----------|----------|----------|----------|----------|----------|----------|----------|----------|----------|-----------|-----------|-----------|----------|----------|-----------|----------|
| AT3G23460 | AT3G23460 | 0         | 0        | 1.287654 | 1.237247 | 0        | 0        | 0        | 0        | 0.976246 | 0        | 0        | 0         | 0.025832  | NA        | -0.04681 | NA       | -0.20208  | NA       |
| AT3G23470 | AT3G23470 | 8.322328  | 24.97944 | 11.58889 | 10.31039 | 9.274542 | 7.974726 | 19.56468 | 19.42002 | 19.52942 | 12.47396 | 7.982004 | 8.287252  | -0.51906  | 0.296316  | 0.405989 | 0.444296 | -0.4595   | NA       |
| AT3G23480 | AT3G23480 | 38.8376   | 380.0444 | 355.3926 | 307.2496 | 280.2237 | 274.1312 | 385.0684 | 297.7736 | 31.92492 | 291.6988 | 279.3701 | 342.8851  | -0.30607  | 0.056316  | -0.07514 | 0.714511 | -0.22406  | 0.397135 |
| AT3G23490 | CYN       | 526.6844  | 690.5032 | 634.8136 | 922.5736 | 887.7061 | 840.3368 | 964.8943 | 868.5064 | 1095.348 | 904.8421 | 953.8495 | 748.9604  | 0.513671  | 0.000808  | 0.654698 | 1.59E-05 | 0.488317  | 0.01405  |
| AT3G23510 | AT3G23510 | 83.22328  | 71.36984 | 84.98519 | 54.43886 | 53.65985 | 73.76622 | 35.57214 | 33.44559 | 20.50117 | 58.53167 | 46.56169 | 50.75942  | -0.40497  | 0.153366  | -1.34811 | 1.08E-07 | -0.5916   | 0.128639 |
| AT3G23530 | AT3G23530 | 696.6977  | 547.7635 | 553.0889 | 369.1119 | 331.8961 | 353.8785 | 317.4813 | 306.4047 | 270.4201 | 540.2186 | 473.5989 | 542.815   | -0.74836  | 1.93607   | -0.47876 | 1.58E-11 | -0.18984  | 0.470766 |
| AT3G23540 | AT3G23540 | 228.2696  | 194.4828 | 217.6136 | 229.3034 | 215.3019 | 225.286  | 208.097  | 213.6202 | 153.2706 | 198.6239 | 164.9614 | 168.8528  | 0.059299  | 0.79145   | -0.15814 | 0.467567 | -0.26204  | 0.38561  |
| AT3G23550 | LALS      | 30.9115   | 42.8219  | 41.20494 | 68.8734  | 74.8588  | 91.70935 | 95.2444  | 923.5298 | 815.1654 | 31.66648 | 27.93701 | 46.61579  | 0.963244  | 4.44E-05  | 4.435857 | 7.2E-101 | -0.08661  | 0.893141 |
| AT3G23560 | ALF5      | 123.646   | 107.0548 | 117.1765 | 256.9349 | 292.1481 | 315.0017 | 319.2599 | 288.0636 | 231.3703 | 101.7108 | 95.78405 | 135.7038  | 1.267143  | 1.63E-11  | 1.230023 | 1.18E-10 | -0.06276  | 0.902602 |
| AT3G23570 | AT3G23570 | 288.9037  | 333.654  | 316.763  | 449.533  | 416.0294 | 420.6668 | 579.8259 | 507.0783 | 715.5883 | 363.664  | 339.2352 | 469.2657  | 0.447522  | 0.013119  | 0.924447 | 4.96E-08 | 0.317187  | 0.265295 |
| AT3G23580 | RNR2A     | 326.9486  | 315.8115 | 339.9407 | 409.5287 | 424.6415 | 417.6763 | 449.9876 | 414.2937 | 349.4961 | 370.3808 | 300.6555 | 379.1418  | 0.341917  | 0.026026  | 0.299056 | 0.068174 | 0.097031  | 0.762813 |
| AT3G23590 | MED33A    | 573.0517  | 487.0992 | 432.6519 | 242.9128 | 235.8383 | 322.9764 | 281.9092 | 330.1403 | 270.4201 | 413.5599 | 383.1362 | 470.3016  | -0.88776  | 2.01E-07  | -0.74483 | 2.38E-05 | -0.23136  | 0.457847 |
| AT3G23600 | AT3G23600 | 789.4322  | 877.849  | 982.4803 | 1565.53  | 1666.768 | 1404.549 | 1208.563 | 1294.668 | 1881.226 | 855.9058 | 667.8277 | 976.8599  | 0.786919  | 4.64E-05  | 0.707634 | 0.000305 | -0.07992  | 0.863358 |
| AT3G23605 | PUX12     | 24.96698  | 41.03766 | 33.47901 | 78.77137 | 96.05775 | 48.8452  | 67.58706 | 58.26006 | 106.4108 | 45.09817 | 46.56169 | 47.6517   | 1.110429  | 0.000567  | 1.147607 | 0.00049  | 0.456724  | 0.235131 |
| AT3G23610 | DSPTP1    | 38.04493  | 26.76369 | 43.78025 | 52.37678 | 49.68505 | 46.85152 | 53.35821 | 34.52448 | 56.62227 | 51.81492 | 58.53469 | 48.68761  | 0.411628  | 0.182775  | 0.369994 | 0.274615 | 0.497937  | 0.439945 |
| AT3G23620 | AT3G23620 | 243.7253  | 283.6951 | 337.3654 | 328.6952 | 365.6819 | 338.9259 | 333.4888 | 234.1191 | 352.4248 | 266.7509 | 208.8624 | 339.7773  | 0.2493    | 0.299606  | 0.088705 | 0.761965 | -0.0779   | 0.879034 |
| AT3G23630 | IP77      | 1.188904  | 1.784246 | 0        | 6.598649 | 3.312336 | 2.990522 | 1.778607 | 1.07889  | 0        | 0        | 0        | 1.035907  | 1.150646  | 0.074561  | -0.019   | 0.982312 | -0.31134  | NA       |
| AT3G23633 | AT3G23633 | 0         | 0        | 0        | 0.412416 | 0        | 0        | 0        | 0        | 0        | 0        | 0        | 0         | 0.095918  | NA        | 0        | NA       | 0         | NA       |
| AT3G23635 | RTFL13    | 2.377808  | 1.784246 | 0        | 4.365671 | 5.299738 | 3.987363 | 5.335821 | 3.23667  | 7.809968 | 3.838143 | 0        | 0.2071813 | 0.908936  | 0.167947  | 1.063644 | 0.115568 | 0.210971  | NA       |
| AT3G23637 | DVL21     | 0         | 0        | 0        | 2.886909 | 1.987402 | 0.996841 | 2.66791  | 1.07889  | 3.904984 | 0        | 1.330334 | 0         | 0.930928  | 0.141457  | 1.06829  | 0.095525 | 0.151314  | NA       |
| AT3G23640 | HGL1      | 798.9435  | 831.4587 | 719.7988 | 517.1691 | 416.0294 | 635.9844 | 528.2463 | 647.334  | 419.7858 | 711.9754 | 577.3649 | 706.4883  | -0.56987  | 0.004033  | -0.54449 | 0.007693 | -0.22763  | 0.523736 |
| AT3G23645 | AT3G23645 | 0         | 0        | 0        | 0.412416 | 0        | 0.996841 | 0        | 0        | 0        | 0        | 0        | 1.330334  | 0         | 0         | 0.247049 | NA       | 0.204255  | NA       |
| AT3G23650 | AT3G23650 | 0         | 0        | 0        | 0        | 0        | 0        | 0        | 0        | 0        | 0        | 0        | 0         | #N/A      | #N/A      | #N/A     | #N/A     | #N/A      | #N/A     |
| AT3G23660 | AT3G23660 | 379.2604  | 314.0273 | 337.3654 | 305.5999 | 286.8483 | 365.8406 | 375.2861 | 388.4004 | 261.6339 | 300.3347 | 332.5835 | 270.3716  | -0.11016  | 0.628633  | -0.01083 | 0.968201 | -0.19128  | 0.587922 |
| AT3G23670 | KIN12B    | 174.7689  | 103.4863 | 136.4914 | 136.5096 | 120.569  | 156.504  | 130.7276 | 166.1491 | 117.1495 | 152.5662 | 176.9344 | 172.9964  | -0.02527  | 0.934286  | -0.02087 | 0.948451 | 0.250515  | 0.531948 |
| AT3G23680 | AT3G23680 | 0         | 0        | 0        | 0        | 0        | 0        | 0        | 0        | 0        | 0        | 0        | 0         | 0         | NA        | 0        | NA       | 0.322821  | NA       |
| AT3G23685 | AT3G23685 | 0         | 0        | 0        | 0        | 0        | 0        | 0        | 0        | 0        | 0        | 0        | 0         | #N/A      | #N/A      | #N/A     | #N/A     | #N/A      | #N/A     |
| AT3G23690 | BHLH77    | 496.9618  | 553.1163 | 520.2124 | 549.3375 | 490.2258 | 573.1834 | 494.4527 | 523.2616 | 424.667  | 521.0278 | 445.6619 | 506.5583  | 0.039311  | 0.828579  | -0.11909 | 0.487774 | -0.08567  | 0.717179 |
| AT3G23700 | AT3G23700 | 1761.9556 | 1957.318 | 1758.936 | 190.2098 | 1121.557 | 1129.421 | 1767.046 | 1696.015 | 1573.709 | 1822.158 | 2084.633 | 1877.063  | -0.75145  | 3.89E-12  | -0.1187  | 0.389214 | 0.078093  | 0.741496 |
| AT3G23710 | TIC22L    | 120.0793  | 108.839  | 117.1765 | 171.9773 | 153.6924 | 150.523  | 151.1816 | 141.3346 | 173.7718 | 117.0633 | 130.3727 | 154.3501  | 0.451111  | 0.018466  | 0.415351 | 0.042248 | 0.230705  | 0.570796 |
| AT3G23715 | SCR13     | 0         | 0        | 0        | 0        | 0        | 0        | 0        | 0        | 0        | 0        | 0        | 0         | #N/A      | #N/A      | #N/A     | #N/A     | #N/A      | #N/A     |
| AT3G23720 | AT3G23720 | 0         | 0        | 0        | 0.412416 | 0        | 0        | 0        | 0        | 0        | 0        | 0        | 0         | 0.095918  | NA        | 0        | NA       | 0         | NA       |
| AT3G23725 | AT3G23725 | 1.188904  | 3.568492 | 0        | 0        | 1.324935 | 0        | 0.889303 | 0        | 0        | 0        | 0        | 1.330334  | 1.035907  | -0.44336  | NA       | -0.49417 | NA        | -0.26664 |
| AT3G23727 | SCR12     | 0         | 0        | 0        | 0        | 0        | 0        | 0        | 0        | 0        | 0        | 0        | 0         | #N/A      | #N/A      | #N/A     | #N/A     | #N/A      | #N/A     |
| AT3G23730 | XTH16     | 200.9248  | 139.1712 | 162.2444 | 200.434  | 245.7754 | 248.2134 | 167.1891 | 173.7013 | 256.7527 | 192.8667 | 251.4331 | 245.5098  | 0.438703  | 0.056114  | 0.232939 | 0.382697 | 0.430652  | 0.208696 |
| AT3G23740 | AT3G23740 | 99.86793  | 32.11643 | 46.35556 | 29.69392 | 33.78583 | 40.87047 | 31.12562 | 28.05114 | 20.50117 | 62.36982 | 63.85603 | 66.29802  | -0.75083  | 0.034006  | -1.07986 | 0.002865 | 0.078229  | 0.927445 |
| AT3G23750 | AT3G23750 | 606.341   | 369.3389 | 421.063  | 277.1433 | 303.41   | 327.9606 | 328.155  | 352.797  | 375.8547 | 349.271  | 427.0372 | 369.8186  | -0.61553  | 0.010226  | -0.3992  | 0.505381 | -0.28687  | 0.362337 |
| AT3G23760 | AT3G23760 | 74.90095  | 89.2123  | 110.7383 | 82.0707  | 87.44568 | 76.75674 | 94.26617 | 97.10009 | 113.2445 | 84.43914 | 114.4087 | 94.26749  | -0.14869  | 0.573347  | 0.144641 | 0.610952 | 0.081275  | 0.878139 |
| AT3G23770 | AT3G23770 | 1.188904  | 1.784246 | 3.862963 | 0        | 1.324935 | 0        | 1.07889  | 0        | 2.878607 | 2.660668 | 4.143626 | 0         | -0.86398  | 0.19341   | -0.84166 | 0.219627 | 0.315833  | NA       |
| AT3G23780 | NRPD2     | 398.2828  | 331.8698 | 303.8864 | 193.8353 | 159.6546 | 184.4155 | 188.5323 | 237.3558 | 168.8906 | 238.9244 | 247.4421 | 214.4327  | -0.92338  | 7.32E-08  | -0.78581 | 9.57E-06 | -0.55315  | 0.017822 |
| AT3G23790 | AAE16     | 93.92341  | 115.976  | 73.3963  | 94.85558 | 87.44568 | 88.71883 | 141.3993 | 126.2301 | 115.197  | 93.07496 | 101.1054 | 81.83662  | -0.04186  | 0.883985  | 0.440819 | 0.054308 | -0.02463  | 0.967711 |
| AT3G23800 | SBP3      | 0         | 0        | 1.287654 | 0        | 0.662467 | 0        | 0        | 0        | 0.976246 | 0.959536 | 0        | 1.035907  | -0.14665  | NA        | -0.0654  | NA       | 0.126358  | NA       |
| AT3G23805 | RALFH2    | 102.2457  | 110.6233 | 105.5877 | 65.16166 | 71.54647 | 50.83888 | 58.69403 | 39.91893 | 76.14719 | 111.3061 | 148.9974 | 147.0987  | -0.71702  | 0.003606  | -0.8189  | 0.001404 | 0.34244   | 0.403727 |
| AT3G23810 | SAH2H     | 257.733   | 1905.575 | 1952.084 | 1028.564 | 1218.94  | 1151.351 | 902.643  | 966.6854 | 1112.92  | 2038.054 | 2016.786 | 1921.607  | -0.90962  | 1.19E-10  | -0.19449 | 1.19E-14 | -0.1066   | 0.727711 |
| AT3G23820 | GAE5      | 2598.944  | 2310.599 | 2071.836 | 1403.45  | 1374.62  | 1394.58  | 1262.811 | 1403.636 | 1361.863 | 1719.488 | 1623.007 | 1762.077  | -0.73657  | 7.15E-12  | -0.78736 | 2.94E-13 | -0.44775  | 0.00089  |
| AT3G23830 | RBG4      | 131.9683  | 130.25   | 133.9161 | 140.6337 | 160.3171 | 139.5577 | 191.5926 | 81.99564 | 201.1067 | 148.728  | 117.0694 | 142.9551  | -0.145058 | 0.679845  | -0.07557 | 0.952854 | 0.045373  | 0.952813 |
| AT3G23840 | CEP2L6    | 60.6341   | 92.78079 | 90.1358  | 36.29257 | 45.71024 | 39.87363 | 32.01493 | 36.68226 | 56.62227 | 93.07496 | 73.16837 | 70.44164  | -0.94169  | 0.000569  | -0.89623 | 0.001896 | -0.02195  | 0.978172 |
| AT3G23850 | AT3G23850 | 0         | 0        | 0        | 0        | 0        | 0        | 0        | 0        | 0        | 0        | 0        | 0         | #N/A      | #N/A      | #N/A     | #N/A     | #N/A      | #N/A     |
| AT3G23860 | AT3G23860 | 0         | 0        | 0        | 0        | 0        | 1.778607 | 0        | 0        | 0        | 0        | 0        | 0         | 0         | NA        | 0.248756 | NA       | 0.97504   | NA       |
| AT3G23870 | AT3G23870 | 14.26685  | 23.1952  | 30.9037  | 11.96005 | 12.58688 | 21.9305  | 15.11816 | 12.94668 | 7.809968 | 18.23118 | 22.61568 | 29.00538  | -0.52534  | 0.246501  | -0.78933 | 0.093157 | 0.037628  | 0.929124 |
| AT3G23880 | AT3G23880 | 35.66712  | 55.31163 | 46.35556 | 65.98649 | 61.60946 | 73.76622 | 85.37313 | 75.5223  | 84.9334  | 50.85539 | 45.23135 | 51.79533  | 0.54328   | 0.0303894 | 0.831843 | 0.000959 | 0.129     | 0.895201 |
| AT3G23890 | TOP2      | 479.1283  | 340.791  | 342.5161 | 277.9681 | 271.6116 | 300.0491 | 315.7027 | 371.1381 | 259.6814 | 392.4521 | 343.2262 | 406.0754  | -0.44867  | 0.018201  | -0.29555 | 0.159668 | -0.006768 | 0.988934 |
| AT3G23900 | AT3G23900 | 477.9394  | 408.5923 | 392.7346 | 315.4979 | 319.9717 | 333.9417 | 379.7326 | 421.846  | 362.0424 | 392.4501 | 517.4999 | 417.4703  | -0.39733  | 0.015738  | -0.1808  | 0.347648 | 0.046165  | 0.905938 |
| AT3G23910 | AT3G23910 | 149.8019  | 151.6609 | 115.8889 | 161.6669 |          |          |          |          |          |          |          |           |           |           |          |          |           |          |







|           |           |          |          |          |          |          |          |          |          |          |          |          |          |          |          |           |          |           |          |
|-----------|-----------|----------|----------|----------|----------|----------|----------|----------|----------|----------|----------|----------|----------|----------|----------|-----------|----------|-----------|----------|
| AT3G26840 | AT3G26840 | 98.67903 | 98.13353 | 105.5877 | 299.0013 | 239.1507 | 303.0396 | 500.6779 | 489.816  | 370.9735 | 92.11542 | 93.12338 | 75.62118 | 1.433067 | 1.51E-14 | 2.11486   | 4.79E-31 | -0.21179  | 0.603257 |
| AT3G26850 | AT3G26850 | 93.92341 | 130.25   | 135.2037 | 137.7468 | 132.4935 | 141.5514 | 124.5025 | 122.9935 | 100.5533 | 120.9015 | 118.3997 | 133.6319 | 0.200078 | 0.364743 | -0.03544  | 0.901170 | 0.063379  | 0.894522 |
| AT3G26855 | AT3G26855 | 1.188904 | 0        | 0        | 0        | 0        | 0        | 0        | 1.07889  | 0        | 0        | 0        | 0        | -0.2127  | NA       | -0.02202  | NA       | -0.1938   | NA       |
| AT3G26860 | AT3G26860 | 0        | 0        | 0        | 0        | 0        | 0        | 0        | 0        | 0        | 0        | 0        | 0        | #N/A     | #N/A     | #N/A      | #N/A     | #N/A      | #N/A     |
| AT3G26870 | AT3G26870 | 0        | 0        | 0        | 0        | 0        | 0        | 0        | 0        | 0        | 0        | 0        | 0        | #N/A     | #N/A     | #N/A      | #N/A     | #N/A      | #N/A     |
| AT3G26872 | AT3G26872 | 0        | 0        | 0        | 0        | 0        | 0        | 0        | 0        | 0        | 0        | 0        | 0        | #N/A     | #N/A     | #N/A      | #N/A     | #N/A      | #N/A     |
| AT3G26880 | AT3G26880 | 0        | 0        | 0        | 0        | 0        | 0        | 0        | 0        | 0        | 0        | 0        | 0        | #N/A     | #N/A     | #N/A      | #N/A     | #N/A      | #N/A     |
| AT3G26890 | AT3G26890 | 864.3332 | 876.0648 | 844.7012 | 435.0984 | 486.251  | 514.3698 | 647.4129 | 660.2806 | 547.674  | 681.2703 | 776.915  | 744.8168 | -0.84388 | 2.59E-12 | -0.47309  | 0.000217 | -0.22929  | 0.258119 |
| AT3G26900 | SKL1      | 567.1072 | 708.3457 | 731.3877 | 584.8053 | 620.7318 | 560.2245 | 615.398  | 609.5728 | 709.7308 | 755.1545 | 786.2274 | 855.6588 | -0.17873 | 0.247493 | -0.04941  | 0.798866 | 0.255799  | 0.242011 |
| AT3G26910 | AT3G26910 | 101.0568 | 85.64381 | 51.50617 | 77.53413 | 78.83361 | 81.74094 | 85.37313 | 100.3368 | 47.83605 | 53.734   | 69.17737 | 45.57989 | -0.00026 | 0.999765 | -0.02745  | 0.94994  | -0.47393  | 0.35075  |
| AT3G26920 | AT3G26920 | 121.2682 | 98.13353 | 93.99877 | 102.2791 | 117.2567 | 93.70303 | 135.1741 | 105.7312 | 126.912  | 111.3061 | 98.44471 | 103.5907 | -0.00324 | 0.990993 | 0.221493  | 0.365822 | -0.00383  | 0.995116 |
| AT3G26922 | AT3G26922 | 55.87849 | 41.03766 | 52.79383 | 42.06639 | 54.32232 | 43.86099 | 41.79726 | 29.13003 | 43.93107 | 47.01725 | 45.23135 | 50.75942 | -0.10731 | 0.756204 | -0.37001  | 0.257983 | -0.07547  | 0.913172 |
| AT3G26930 | AT3G26930 | 5.94452  | 5.352738 | 7.725926 | 3.299325 | 3.974804 | 4.984204 | 5.335821 | 2.15778  | 4.88123  | 6.716729 | 2.660668 | 7.251346 | -0.49705 | 0.446417 | -0.42932  | 0.546635 | -0.11506  | NA       |
| AT3G26932 | DRB3      | 217.5694 | 253.3629 | 221.4765 | 211.5692 | 225.9013 | 214.3208 | 197.4254 | 198.5157 | 142.5319 | 273.4677 | 312.6285 | 242.4021 | -0.08041 | 0.718129 | -0.34984  | 0.075054 | 0.255562  | 0.392343 |
| AT3G26934 | AT3G26934 | 0        | 0        | 0        | 0        | 0        | 0        | 0        | 0.889303 | 0        | 0        | 0        | 0        | 0        | NA       | 0         | NA       | 0         | NA       |
| AT3G26935 | PAT07     | 382.8271 | 356.8492 | 350.242  | 242.9128 | 219.2767 | 227.2797 | 206.3184 | 243.8291 | 309.47   | 313.7682 | 234.1388 | 298.3411 | -0.64548 | 0.000253 | -0.5117   | 0.00606  | -0.35322  | 0.205247 |
| AT3G26940 | CDG1      | 0        | 0        | 0        | 0        | 0.662467 | 0        | 1.778607 | 0        | 0        | 0        | 0        | 0        | 0.091702 | NA       | 0.255494  | NA       | 0         | NA       |
| AT3G26950 | AT3G26950 | 317.4374 | 358.6335 | 328.3519 | 248.6866 | 203.3775 | 194.384  | 171.6356 | 223.3302 | 235.2753 | 329.1207 | 268.7275 | 320.0951 | -0.61111 | 0.000406 | -0.65789  | 0.000207 | -0.12061  | 0.739371 |
| AT3G26960 | AT3G26960 | 194.9802 | 103.4863 | 123.6148 | 52.78919 | 36.4357  | 30.90206 | 35.57214 | 23.73558 | 36.1211  | 185.1904 | 212.8534 | 139.8474 | -1.6878  | 1.25E-09 | -2.00313  | 4.32E-12 | 0.322139  | 0.527624 |
| AT3G26980 | MUBA      | 200.9248 | 174.8561 | 207.3123 | 363.3381 | 410.0672 | 397.7395 | 419.7512 | 349.5603 | 453.9544 | 246.6007 | 211.5231 | 238.2585 | 0.979544 | 9.07E-11 | 1.045036  | 6.8E-12  | 0.247407  | 0.375703 |
| AT3G26990 | AT3G26990 | 128.4016 | 148.0924 | 115.8889 | 91.96867 | 83.47088 | 99.68408 | 86.26244 | 94.94231 | 71.26596 | 90.19635 | 91.79304 | 87.01615 | -0.49507 | 0.013445 | -0.61156  | 0.003489 | -0.52154  | 0.06913  |
| AT3G27000 | ARP2      | 77.27876 | 80.29107 | 65.67037 | 105.5784 | 137.7932 | 114.6367 | 86.26244 | 94.94231 | 90.79088 | 82.52006 | 47.89202 | 74.58527 | 0.660733 | 0.004895 | 0.276858  | 0.032680 | -0.09578  | 0.867545 |
| AT3G27010 | TCP20     | 55.87849 | 32.11643 | 51.50617 | 51.55195 | 59.62205 | 58.81361 | 57.80473 | 48.55005 | 82.00466 | 57.57214 | 58.53469 | 54.90305 | 0.233976 | 0.468724 | 0.385245  | 0.229921 | 0.248459  | 0.650556 |
| AT3G27020 | YSL6      | 388.1773 | 826.1059 | 741.6889 | 367.8747 | 374.9565 | 385.7774 | 430.4229 | 457.4493 | 374.8785 | 546.9353 | 572.0436 | 526.2405 | -1.08252 | 2.8E-21  | -0.92078  | 3.45E-15 | -0.54347  | 0.000118 |
| AT3G27025 | AT3G27025 | 36.85602 | 19.62671 | 25.75309 | 6.598649 | 9.937009 | 7.974726 | 11.56095 | 14.02557 | 9.76246  | 26.867   | 15.96401 | 22.78994 | -1.16246 | 7.13E-05 | -1.10227  | 0.00938  | -0.29711  | 0.704068 |
| AT3G27027 | AT3G27027 | 2.377808 | 1.784246 | 5.150617 | 3.71174  | 1.324935 | 0.996841 | 1.778607 | 2.15778  | 1.952492 | 3.88143  | 11.97301 | 5.179533 | -0.32301 | 0.670921 | -0.37953  | 0.633299 | 0.738529  | NA       |
| AT3G27030 | AT3G27030 | 23.77808 | 32.11643 | 18.02716 | 20.20836 | 17.88662 | 19.93682 | 12.45025 | 10.7889  | 23.4299  | 28.78607 | 43.90102 | 27.96948 | -0.2907  | 0.511122 | -0.56212  | 0.209447 | 0.416952  | 0.539974 |
| AT3G27040 | AT3G27040 | 0        | 0        | 0        | 0        | 0        | 0.889303 | 0        | 0        | 0        | 0        | 0        | 0        | 0        | NA       | 0         | NA       | 0         | NA       |
| AT3G27050 | AT3G27050 | 254.4254 | 265.8527 | 271.6951 | 258.997  | 261.0121 | 218.3081 | 187.643  | 188.8057 | 286.0401 | 362.7045 | 360.5205 | 313.8797 | -0.09368 | 0.686873 | -0.25079  | 0.253832 | 0.380382  | 0.181131 |
| AT3G27060 | TSO2      | 458.9169 | 422.8663 | 442.9531 | 503.5594 | 453.1276 | 421.6636 | 288.1343 | 284.8269 | 349.4961 | 471.132  | 403.0912 | 457.8707 | 0.059489 | 0.744188 | -0.51653  | 0.000447 | 0.008691  | 0.983854 |
| AT3G27070 | TOM20-1   | 1.188904 | 0        | 1.287654 | 1.649662 | 1.324935 | 0        | 1.778607 | 2.15778  | 0.976246 | 0        | 0        | 0        | 0.118024 | 0.878156 | 0.336944  | 0.646558 | -0.49169  | NA       |
| AT3G27080 | TOM20-3   | 191.4135 | 158.7979 | 216.3259 | 321.2717 | 324.609  | 291.0775 | 237.444  | 214.6991 | 307.5175 | 209.1788 | 230.1478 | 227.8994 | 0.704562 | 5.72E-05 | 0.405712  | 0.037663 | -0.219875 | 0.508088 |
| AT3G27090 | AT3G27090 | 1542.008 | 1828.852 | 1805.291 | 2022.898 | 1941.692 | 1988.697 | 1832.854 | 1748.881 | 1722.098 | 1619.696 | 1547.178 | 1695.779 | 0.202248 | 0.066284 | 0.036759  | 0.801235 | -0.08721  | 0.676221 |
| AT3G27095 | AT3G27095 | 0        | 0        | 0        | 1.412416 | 1.324935 | 0        | 0.889303 | 0        | 0        | 0        | 0        | 0        | 0.316707 | NA       | 0.14819   | NA       | 0.17207   | NA       |
| AT3G27100 | SUS1      | 84.41218 | 89.2123  | 84.98519 | 145.1703 | 181.516  | 110.6493 | 110.2736 | 84.15342 | 174.748  | 94.9403  | 102.4357 | 80.80071 | 0.726995 | 0.008972 | 0.489173  | 0.111787 | 0.097414  | 0.882916 |
| AT3G27110 | AT3G27110 | 254.4254 | 362.2019 | 305.1741 | 413.2404 | 400.1302 | 396.7426 | 480.2239 | 530.8138 | 444.1919 | 356.9473 | 331.2532 | 301.4488 | 0.397127 | 0.102489 | 0.657432  | 1.86E-05 | 0.11096   | 0.736098 |
| AT3G27120 | AT3G27120 | 16.64466 | 14.27397 | 3.862963 | 9.897974 | 14.57428 | 10.96525 | 8.003721 | 9.710009 | 8.786214 | 10.55489 | 17.29434 | 9.323159 | 0.029236 | 0.964606 | -0.31274  | 0.618881 | 0.06795   | NA       |
| AT3G27130 | AT3G27130 | 3.566712 | 3.568492 | 5.150617 | 4.124156 | 0.662467 | 1.993682 | 5.335821 | 4.31556  | 0        | 3.838143 | 9.312338 | 2.071813 | -0.45129 | 0.53837  | -0.1969   | 0.818015 | 0.164665  | NA       |
| AT3G27140 | AT3G27140 | 0        | 0        | 0        | 0        | 0        | 0        | 0        | 0.976246 | 0        | 0        | 0        | 0        | 0        | NA       | 0         | NA       | 0         | NA       |
| AT3G27150 | AT3G27150 | 2.377808 | 1.784246 | 1.287654 | 1.649662 | 1.324935 | 0.996841 | 0        | 0        | 5.757214 | 3.991002 | 3.10772  | 0        | -0.19382 | 0.81071  | -0.94408  | 0.16802  | 0.762531  | NA       |
| AT3G27160 | GHS1      | 238.3173 | 273.0347 | 265.9006 | 2283.957 | 2384.22  | 1773.38  | 2583.427 | 2028.313 | 3471.531 | 3097.381 | 4934.209 | 3562.483 | -0.19578 | 0.455823 | 0.12077   | 0.673239 | 0.623995  | 0.031496 |
| AT3G27170 | CLC-B     | 51.12287 | 32.11643 | 43.78025 | 11.96005 | 13.24935 | 18.93997 | 8.003731 | 5.39445  | 3.904984 | 25.90746 | 39.91002 | 29.00538 | -1.4543  | 2.72E-05 | -2.46454  | 3.82E-10 | -0.42165  | 0.498675 |
| AT3G27180 | AT3G27180 | 229.4585 | 187.3458 | 238.2161 | 157.5427 | 153.6924 | 191.3934 | 192.8086 | 211.4624 | 139.6032 | 200.5429 | 203.5411 | 214.4327 | -0.38786 | 0.051199 | -0.27154  | 0.21964  | -0.08713  | 0.844242 |
| AT3G27190 | UKL2      | 34.47821 | 51.74313 | 42.49259 | 58.1506  | 68.23413 | 69.77885 | 49.71308 | 52.86561 | 52.71728 | 34.54328 | 38.57969 | 36.25673 | 0.594862 | 0.025966 | 0.254338  | 0.441524 | -0.20643  | 0.722849 |
| AT3G27200 | AT3G27200 | 46.36725 | 35.68492 | 57.94445 | 43.71605 | 26.49869 | 26.9147  | 23.12189 | 14.02557 | 25.3824  | 52.77446 | 49.22236 | 54.90305 | -0.47206 | 0.166493 | -1.06969  | 0.001784 | 0.144781  | 0.840517 |
| AT3G27210 | Y-2       | 49.93397 | 51.74313 | 81.12272 | 270.957  | 296.7853 | 242.2323 | 308.5883 | 297.7736 | 376.831  | 45.09817 | 45.23135 | 63.1903  | 2.067345 | 4.57E-23 | 0.337202  | 3.86E-29 | -0.24606  | 0.605123 |
| AT3G27220 | AT3G27220 | 63.01191 | 62.44861 | 59.14938 | 59.38784 | 65.58426 | 61.80413 | 44.46517 | 61.49673 | 52.71728 | 74.84378 | 83.81104 | 76.65708 | -0.26645 | 0.333327 | -0.49456  | 0.074174 | 0.052808  | 0.933811 |
| AT3G27230 | AT3G27230 | 404.2273 | 392.531  | 413.337  | 428.0784 | 459.0898 | 393.7521 | 334.3781 | 326.9037 | 311.4225 | 413.5599 | 312.6285 | 387.429  | 0.082638 | 0.634535 | -0.31166  | 0.045975 | -0.11376  | 0.694266 |
| AT3G27240 | CY11      | 639.6303 | 578.0957 | 535.6642 | 488.7155 | 530.6363 | 503.4046 | 433.0908 | 454.2127 | 557.4365 | 578.6    | 631.9086 | 566.6409 | -0.20244 | 0.186081 | -0.27691  | 0.073249 | 0.016764  | 0.9656   |
| AT3G27250 | AT3G27250 | 43.98945 | 28.54794 | 42.49259 | 2.474493 | 1.987402 | 5.981045 | 6.225124 | 3.23667  | 3.904984 | 34.54328 | 33.25835 | 26.93357 | -3.06306 | 4.4E-14  | -2.62622  | 4.04E-10 | -0.27179  | 0.711019 |
| AT3G27260 | GTE8      | 798.9435 | 719.0512 | 704.3469 | 626.8717 | 563.0972 | 707.757  | 790.5908 | 887.9264 | 614.0987 | 768.933  | 723.0632 | 0        | -0.22712 | 0.190551 | -0.042692 | 0.848866 | 0.003446  | 0.993436 |
| AT3G27270 | AT3G27270 | 19.02246 | 16.05821 | 11.58889 | 11.54764 | 19.21155 | 9.968408 | 5.335821 | 10.7889  | 7.809968 | 6.176479 | 7.982004 | 6.215439 | -0.14526 | 0.803607 | -0.80982  | 0.12597  | -0.9478   | NA       |
| AT3G27280 | PBH4      | 143.8574 | 164.1506 | 182      |          |          |          |          |          |          |          |          |          |          |          |           |          |           |          |





|           |           |           |          |          |          |          |          |          |          |          |          |          |           |          |           |          |          |          |          |
|-----------|-----------|-----------|----------|----------|----------|----------|----------|----------|----------|----------|----------|----------|-----------|----------|-----------|----------|----------|----------|----------|
| AT3G28455 | CLE25     | 39.23383  | 23.1952  | 30.9037  | 32.99325 | 17.88662 | 26.9147  | 19.56468 | 29.13003 | 22.45366 | 22.06932 | 29.26735 | 36.25673  | -0.24492 | 0.563597  | -0.38276 | 0.382054 | -0.10671 | 0.902619 |
| AT3G28460 | AT3G28460 | 263.9367  | 349.7122 | 332.2148 | 234.6645 | 211.3271 | 226.2829 | 283.6878 | 280.5114 | 261.6339 | 323.3635 | 349.8778 | 367.7468  | -0.47638 | 0.001587  | -0.18532 | 0.288271 | 0.142941 | 0.61756  |
| AT3G28470 | ATMYB35   | 1.188904  | 1.784246 | 0        | 1.237247 | 0.662467 | 0.996841 | 0.889303 | 0        | 0.976246 | 3.831843 | 1.330334 | 1.035907  | 0.000275 | 0.999994  | -0.16971 | 0.983505 | 0.478655 | NA       |
| AT3G28480 | P4H7      | 214.0027  | 267.6369 | 226.6272 | 546.0382 | 480.9512 | 467.5183 | 329.0423 | 342.0081 | 343.6386 | 214.936  | 174.2738 | 203.0377  | 1.075765 | 1.61E-14  | 0.519297 | 0.000778 | -0.23826 | 0.373342 |
| AT3G28490 | P4H6      | 0         | 0        | 0        | 0.662467 | 0        | 0.889303 | 0        | 0        | 0        | 0        | 0        | 0         | 0.097058 | NA        | 0.130384 | NA       | 0        | 0        |
| AT3G28500 | RPP2C     | 77.27876  | 66.0171  | 66.95803 | 43.30364 | 44.38531 | 12.95893 | 20.01119 | 18.34113 | 59.55101 | 118.0229 | 143.6761 | 145.0269  | -0.91994 | 0.019746  | -0.92546 | 0.024705 | 0.862795 | 0.114476 |
| AT3G28510 | AT3G28510 | 36.85602  | 48.17464 | 38.2284  | 768.3302 | 769.1245 | 730.6843 | 40.01866 | 52.86561 | 60.52725 | 1.919071 | 2.660668 | 4.143626  | 4.260894 | 1.05E-91  | 0.434016 | 0.133108 | -0.69285 | 5.08E-11 |
| AT3G28520 | AT3G28520 | 0         | 0        | 0        | 0        | 0        | 0        | 0        | 0        | 0        | 0        | 0        | 0         | 0        | 0.1035907 | 0        | 0        | 0.172362 | NA       |
| AT3G28530 | AT3G28530 | 0         | 0        | 1.287654 | 0        | 0        | 0        | 0        | 0        | 0.976246 | 0        | 1.330334 | 0         | -0.25782 | NA        | -0.04904 | NA       | -0.01245 | NA       |
| AT3G28540 | AT3G28540 | 474.3727  | 399.6711 | 287.1469 | 1549.858 | 1615.758 | 1199.199 | 626.0697 | 639.7817 | 1004.557 | 175.595  | 234.1388 | 171.9605  | 1.84161  | 5.54E-17  | 0.930499 | 6.98E-05 | -0.95859 | 0.000811 |
| AT3G28550 | AT3G28550 | 1.188904  | 0        | 1.287654 | 0.412416 | 0        | 0        | 0.889303 | 0        | 0.976246 | 0        | 0        | 0         | -0.40263 | NA        | -0.09041 | NA       | -0.4742  | NA       |
| AT3G28560 | AT3G28560 | 4.755616  | 5.352738 | 6.438272 | 1.649662 | 3.974804 | 2.990522 | 6.225124 | 3.23667  | 0.976246 | 0.959536 | 2.660668 | 11.39497  | -0.59582 | 0.393502  | -0.3899  | 0.618505 | -0.07299 | NA       |
| AT3G28570 | AT3G28570 | 2.377808  | 5.352738 | 1.287654 | 0.412416 | 0.662467 | 2.66791  | 4.31556  | 0.976246 | 2.878607 | 2.660668 | 7.251346 | 0         | -0.79907 | 0.245785  | -0.05506 | 0.951075 | 0.38182  | NA       |
| AT3G28580 | AT3G28580 | 14.26685  | 16.05821 | 14.1642  | 267.6577 | 305.3974 | 302.0428 | 362.8358 | 383.0059 | 582.8189 | 2.878607 | 13.30334 | 6.215439  | 3.983711 | 9.48E-43  | 4.569372 | 2.71E-56 | -0.82038 | 0.181246 |
| AT3G28590 | AT3G28590 | 0         | 0        | 0        | 0        | 0        | 0        | 0.889303 | 0        | 0        | 0        | 0        | 0         | 0.160764 | NA        | 0.160764 | NA       | -0.01245 | NA       |
| AT3G28600 | AT3G28600 | 0         | 0        | 1.287654 | 29.28151 | 16.56168 | 27.91154 | 43.57587 | 40.99782 | 43.93107 | 0.959536 | 2.660668 | 2.071813  | 3.089223 | 6.46E-10  | 3.826011 | 7.62E-15 | 0.329146 | 0.79509  |
| AT3G28610 | AT3G28610 | 1.188904  | 0        | 2.575309 | 0.662467 | 0        | 0        | 0        | 0        | 0        | 1.919071 | 2.660668 | 0         | -0.56047 | NA        | -0.65505 | NA       | 0.08854  | NA       |
| AT3G28611 | AT3G28611 | 0         | 0        | 0        | 0.412416 | 0        | 0        | 0.889303 | 0        | 0.959536 | 0        | 0        | 0         | 0.066524 | NA        | 0.14834  | NA       | 0.160663 | NA       |
| AT3G28620 | AT3G28620 | 3.566712  | 7.136984 | 3.862963 | 7.835896 | 6.246733 | 7.974726 | 8.893035 | 11.86779 | 11.71495 | 9.595356 | 3.991002 | 10.35907  | 0.472585 | 0.439089  | 0.907428 | 0.119909 | 0.578605 | NA       |
| AT3G28630 | AT3G28630 | 14.26685  | 5.352738 | 5.150617 | 11.13522 | 7.28714  | 6.977885 | 7.114428 | 11.86779 | 5.857476 | 9.595356 | 2.660668 | 7.251346  | 0.027902 | 0.969342  | -0.03842 | 0.96069  | -0.25567 | NA       |
| AT3G28640 | PCMP-E79  | 20.21137  | 21.41095 | 20.60247 | 25.15735 | 21.86142 | 24.92102 | 30.23632 | 31.28781 | 14.64369 | 20.15025 | 18.62468 | 19.68222  | 0.193557 | 0.668591  | 0.265724 | 0.571361 | -0.07552 | 0.939653 |
| AT3G28650 | AT3G28650 | 0         | 0        | 0        | 0.412416 | 0        | 0        | 0.889303 | 0        | 0        | 0        | 0        | 0         | 0.066991 | NA        | 0.136991 | NA       | 0        | NA       |
| AT3G28660 | PCMP-E80  | 41.61164  | 32.11643 | 37.34198 | 36.70499 | 37.76063 | 27.91154 | 33.79353 | 45.31338 | 35.14486 | 42.21957 | 29.26735 | 34.18492  | -0.10447 | 0.785796  | 0.019107 | 0.965261 | -0.06711 | 0.932511 |
| AT3G28670 | AT3G28670 | 183.0912  | 180.2088 | 218.9012 | 291.5778 | 250.4126 | 301.0459 | 238.3333 | 229.8036 | 232.3465 | 212.0574 | 172.9434 | 200.9659  | 0.520135 | 0.001096  | 0.258616 | 0.163113 | 0.010955 | 0.982852 |
| AT3G28674 | AT3G28674 | 0         | 0        | 0        | 0        | 0        | 0        | 0        | 0        | 0        | 0        | 0        | 0         | #N/A     | #N/A      | #N/A     | #N/A     | #N/A     | #N/A     |
| AT3G28680 | AT3G28680 | 0         | 0        | 0        | 0        | 0        | 0        | 0        | 0        | 0        | 0        | 0        | 0         | #N/A     | #N/A      | #N/A     | #N/A     | #N/A     | #N/A     |
| AT3G28685 | AT3G28685 | 0         | 0        | 0        | 0        | 0        | 0        | 0        | 0        | 0        | 0        | 0        | 0         | #N/A     | #N/A      | #N/A     | #N/A     | #N/A     | #N/A     |
| AT3G28690 | AT3G28690 | 432.761   | 412.1608 | 386.2963 | 351.3781 | 350.4452 | 376.8058 | 342.3818 | 400.2682 | 340.7099 | 363.664  | 290.0128 | 356.3518  | -0.19113 | 0.220737  | -0.18407 | 0.270476 | -0.27688 | 0.217892 |
| AT3G28695 | AT3G28695 | 0         | 0        | 0        | 0        | 0        | 0        | 1.07889  | 0        | 0        | 0        | 0        | 0         | 0        | 0         | 0.16673  | NA       | 0        | NA       |
| AT3G28700 | AT3G28700 | 57.06739  | 69.5856  | 69.53333 | 93.20592 | 72.8714  | 93.70303 | 64.91915 | 63.65451 | 76.14719 | 72.92471 | 53.21336 | 80.80071  | 0.397185 | 0.119903  | 0.065743 | 0.850854 | 0.092673 | 0.874725 |
| AT3G28705 | AT3G28705 | 0         | 0        | 0        | 0        | 0        | 0.996841 | 0        | 1.07889  | 0        | 0        | 0        | 0.1035907 | 0.132403 | NA        | 0.15984  | NA       | 0.162223 | NA       |
| AT3G28710 | VHA-D1    | 1669.221  | 1809.225 | 1939.207 | 1544.496 | 1607.808 | 1590.958 | 1648.769 | 1609.704 | 1578.59  | 2099.464 | 2425.199 | 1656.415  | -0.18919 | 0.237316  | -0.16105 | 0.350036 | 0.186836 | 0.462053 |
| AT3G28715 | VHA-D2    | 871.4666  | 951.0031 | 949.0012 | 941.1323 | 949.9781 | 958.9608 | 987.1269 | 988.2632 | 1013.343 | 1046.853 | 1012.384 | 942.6749  | 0.041214 | 0.746415  | 0.109842 | 0.358508 | 0.116168 | 0.524771 |
| AT3G28720 | AT3G28720 | 303.1705  | 260.4999 | 222.7642 | 200.434  | 186.8158 | 181.425  | 212.5435 | 241.6713 | 187.4392 | 192.8667 | 158.3097 | 218.5763  | -0.45528 | 0.014184  | -0.29001 | 0.161689 | -0.45035 | 0.088465 |
| AT3G28730 | SSRP1     | 749.0095  | 715.4827 | 567.8556 | 604.6012 | 611.4573 | 645.9528 | 606.505  | 617.125  | 631.6312 | 625.6172 | 574.7043 | 607.0412  | -0.12537 | 0.403879  | -0.12904 | 0.417472 | -0.16497 | 0.481316 |
| AT3G28740 | CYP81D11  | 15.45575  | 8.92123  | 10.30123 | 14.02213 | 13.24935 | 17.94313 | 25.7898  | 20.49891 | 19.52492 | 19.19071 | 50.55269 | 30.04129  | 0.253953 | 0.628857  | 0.757452 | 0.111108 | 1.27032  | 0.02113  |
| AT3G28750 | AT3G28750 | 14.557616 | 12.88972 | 5.150617 | 3.299325 | 1.987402 | 4.984204 | 6.225124 | 2.15778  | 9.76246  | 2.878607 | 3.991002 | 8.827252  | -0.76322 | 0.228611  | -0.15156 | 0.850985 | -0.34156 | NA       |
| AT3G28760 | AT3G28760 | 134.3461  | 137.3869 | 137.779  | 91.55626 | 100.695  | 98.68724 | 112.9415 | 143.4924 | 103.4821 | 154.4852 | 172.9434 | 177.14    | -0.48678 | 0.010784  | -0.18571 | 0.420899 | 0.293722 | 0.336147 |
| AT3G28770 | AT3G28770 | 85.60108  | 44.60615 | 34.76667 | 7.835896 | 8.612075 | 9.968408 | 32.01493 | 15.10446 | 18.54867 | 99.79171 | 119.7301 | 51.79533  | -2.3028  | 4.12E-09  | -1.17589 | 0.004054 | 0.644969 | 0.289583 |
| AT3G28780 | AT3G28780 | 0         | 7.136984 | 0        | 0        | 0        | 0        | 1.07889  | 0        | 0.959536 | 0        | 3.10772  | 0         | -0.83646 | 0.132166  | -0.60478 | 0.312234 | -0.19448 | NA       |
| AT3G28790 | AT3G28790 | 3.566712  | 35.68492 | 0        | 0        | 0        | 0        | 0        | 0        | 12.47396 | 10.64267 | 11.39497 | 0         | -1.2932  | 0.029921  | -1.26059 | 0.03867  | -0.06303 | NA       |
| AT3G28800 | AT3G28800 | 0         | 0        | 0        | 0        | 0        | 0        | 1.07889  | 0        | 0        | 0        | 0        | 0         | 0        | 0         | 0.16673  | NA       | 0        | NA       |
| AT3G28810 | AT3G28810 | 0         | 0        | 0        | 0        | 0        | 0        | 0        | 0        | 0        | 0        | 0        | 0         | #N/A     | #N/A      | #N/A     | #N/A     | #N/A     | #N/A     |
| AT3G28820 | AT3G28820 | 0         | 0        | 0        | 0        | 0        | 0        | 0        | 0        | 0        | 0        | 1.330334 | 0         | 0        | NA        | 0        | NA       | 0.172362 | NA       |
| AT3G28830 | AT3G28830 | 5.94452   | 23.1952  | 7.25926  | 0.412416 | 0        | 0.889303 | 1.07889  | 0        | 17.2164  | 23.94601 | 10.35907 | 0         | -2.75959 | 1.44E-06  | -2.27077 | 0.000119 | 0.291115 | NA       |
| AT3G28840 | AT3G28840 | 10.70014  | 14.27397 | 15.45185 | 6.186234 | 3.312336 | 1.993682 | 2.66791  | 2.15778  | 2.928738 | 15.35257 | 17.29434 | 17.61041  | -1.34096 | 0.007509  | -1.71735 | 0.001332 | 0.499183 | NA       |
| AT3G28850 | AT3G28850 | 54.68958  | 42.82119 | 25.75309 | 49.90228 | 60.94699 | 51.83572 | 60.47264 | 51.78672 | 91.76712 | 28.78607 | 26.60668 | 65.26211  | 0.359627 | 0.380651  | 0.661151 | 0.093916 | -0.02305 | 0.983524 |
| AT3G28855 | AT3G28855 | 0         | 0        | 0        | 0        | 0        | 0        | 0        | 0        | 0        | 0        | 0        | 0         | #N/A     | #N/A      | #N/A     | #N/A     | #N/A     | #N/A     |
| AT3G28857 | PRE5      | 8.322328  | 7.136984 | 12.87654 | 11.54764 | 16.56168 | 7.974726 | 9.782338 | 4.31556  | 15.61994 | 15.35257 | 17.29434 | 14.50269  | 0.281175 | 0.627303  | 0.041518 | 0.953245 | 0.582581 | NA       |
| AT3G28860 | ABC819    | 2342.141  | 1573.705 | 1658.499 | 410.3553 | 360.3822 | 512.3762 | 50.44789 | 643.0184 | 347.5436 | 1315.523 | 1173.355 | 1221.334  | -2.04857 | 3.11E-22  | -1.79168 | 0.40E-17 | -0.56807 | 0.073075 |
| AT3G28865 | AT3G28865 | 0         | 0        | 0        | 0.662467 | 0        | 4.446517 | 0        | 0        | 3.991002 | 1.035907 | 0        | 0         | 0.030454 | 0.964415  | 0.55388  | 0.33422  | 0.564931 | NA       |
| AT3G28870 | AT3G28870 | 0         | 0        | 0        | 0        | 0        | 0        | 0        | 0        | 0        | 0        | 0        | 0         | #N/A     | #N/A      | #N/A     | #N/A     | #N/A     | #N/A     |
| AT3G28880 | AT3G28880 | 14.26685  | 7.136984 | 25.75309 | 19.79595 | 20.53649 | 22.92734 | 24.01119 | 25.89336 | 13.66744 | 28.78607 | 25.27635 | 11.39497  | 0.317947 | 0.530486  | 0.329306 | 0.543118 | 0.364611 | 0.668265 |
| AT3G28890 | AT3RPL43  | 49.93397  | 53.52738 | 33.47901 | 169.5028 | 183.5034 | 177.4377 | 52.46891 | 56.10228 | 10.73871 | 3.838143 | 11.97301 | 13.46678  | 1.625917 | 0.000934  | -0.15608 | 0.822292 | -1.62371 | 0.013549 |
| AT3G28899 | AT3G28899 | 0         | 0        | 0        | 0.412416 | 0        | 0.996841 | 0.889303 | 1.07889  | 1.952492 | 0        | 0        | 0.1035907 | 0.214341 | NA        | 0.678249 | NA       | 0.182132 | NA       |
| AT3G28900 | RPL34C    | 233.0252  | 223.0308 | 258.8185 | 323.7462 | 321.2336 | 276.1249 | 222.8313 | 452.0019 | 281.1439 | 191.5681 | 313.8797 | 0         |          |           |          |          |          |          |

|           |           |          |            |          |          |          |          |          |          |          |          |          |          |          |          |          |          |          |          |
|-----------|-----------|----------|------------|----------|----------|----------|----------|----------|----------|----------|----------|----------|----------|----------|----------|----------|----------|----------|----------|
| AT3G29156 | AT3G29156 | 4.755616 | 0          | 2.575309 | 0.824831 | 1.324935 | 1.993682 | 1.778607 | 1.07889  | 0.976246 | 0        | 2.660668 | 2.071813 | -0.46558 | 0.526887 | -0.45491 | 0.554468 | -0.36464 | NA       |
| AT3G29160 | KIN11     | 389.9605 | 430.0033   | 385.0086 | 384.7837 | 367.6693 | 393.7521 | 417.0833 | 424.0037 | 317.2799 | 418.3575 | 443.0012 | 362.5673 | -0.06883 | 0.724293 | -0.05331 | 0.804365 | 0.023247 | 0.95645  |
| AT3G29170 | AT3G29170 | 77.27876 | 108.839    | 115.8889 | 230.9527 | 277.5738 | 224.8292 | 176.9714 | 166.1491 | 238.204  | 89.23681 | 103.766  | 83.90843 | 1.248874 | 1.56E-09 | 0.921993 | 2.22E-05 | -0.1192  | 0.815943 |
| AT3G29175 | AT3G29175 | 0        | 0          | 0        | 0        | 0.662467 | 0        | 0        | 0        | 0.976246 | 0        | 0        | 2.071813 | 0.085269 | NA       | 0.142131 | NA       | 0.304789 | NA       |
| AT3G29180 | AT3G29180 | 507.662  | 517.4313   | 482.8704 | 538.6147 | 480.2888 | 448.5784 | 560.2612 | 559.9439 | 460.7881 | 393.4096 | 311.2981 | 440.2603 | -0.03412 | 0.87275  | 0.067948 | 0.753494 | -0.38523 | 0.096882 |
| AT3G29185 | AT3G29185 | 770.4098 | 815.4004   | 802.2807 | 639.6566 | 698.903  | 599.1013 | 832.3881 | 751.9863 | 801.498  | 920.1947 | 932.5641 | 890.8793 | -0.2958  | 0.008315 | 0.000765 | 0.996207 | 0.199553 | 0.253833 |
| AT3G29187 | AT3G29187 | 0        | 0          | 0        | 0        | 0        | 0        | 0        | 0        | 0        | 0        | 0        | 0        | #N/A     | #N/A     | #N/A     | #N/A     | #N/A     | #N/A     |
| AT3G29190 | TP515     | 0        | 0          | 2.575309 | 0.824831 | 1.324935 | 1.993682 | 3.557214 | 1.07889  | 5.857476 | 0.959536 | 0        | 2.071813 | 0.126779 | 0.867682 | 0.865488 | 0.214517 | 0.042235 | NA       |
| AT3G29195 | AT3G29195 | 0        | 0          | 0        | 0        | 0        | 0        | 0        | 0        | 0        | 0        | 0        | 0        | #N/A     | #N/A     | #N/A     | #N/A     | #N/A     | #N/A     |
| AT3G29200 | CM1       | 279.3924 | 226.5992   | 269.1198 | 226.0037 | 209.3397 | 195.3808 | 246.3371 | 251.3814 | 312.3987 | 283.063  | 305.9768 | 267.2639 | -0.29329 | 0.088176 | 0.055394 | 0.806721 | 0.131805 | 0.684244 |
| AT3G29205 | AT3G29205 | 0        | 1.784246   | 0        | 0.412416 | 0        | 0        | 0.889303 | 0        | 0        | 0        | 1.330334 | 0        | -0.19572 | NA       | -0.09468 | NA       | -0.04737 | NA       |
| AT3G29210 | AT3G29210 | 0        | 0          | 0        | 0        | 0        | 0        | 2.66791  | 0        | 0        | 0        | 0        | 0        | 0        | NA       | 0.335767 | NA       | 0        | NA       |
| AT3G29220 | AT3G29220 | 0        | 0          | 0        | 0.824831 | 1.324935 | 1.993682 | 2.66791  | 2.15778  | 1.952492 | 0        | 0        | 0        | 0.696808 | 0.266695 | 1.060877 | 0.082585 | 0        | NA       |
| AT3G29225 | AT3G29225 | 0        | 0          | 0        | 0        | 0        | 0        | 0        | 0        | 0        | 0        | 0        | 0        | #N/A     | #N/A     | #N/A     | #N/A     | #N/A     | #N/A     |
| AT3G29230 | PCMP-E27  | 319.8152 | 276.5581   | 272.9827 | 196.3098 | 190.1281 | 229.2734 | 260.5659 | 255.6969 | 227.4653 | 338.7161 | 373.8238 | 335.6337 | -0.50285 | 0.000771 | -0.22525 | 0.193855 | 0.260144 | 0.277425 |
| AT3G29240 | AT3G29240 | 1498.019 | 1521.962   | 1377.79  | 2845.667 | 2875.77  | 2634.65  | 1008.47  | 1163.043 | 1539.54  | 1198.46  | 1021.696 | 1243.088 | 0.911103 | 2.91E-09 | -0.2406  | 0.193553 | -0.3373  | 0.169193 |
| AT3G29250 | SDR4      | 3.566712 | 1.784246   | 5.150617 | 63.512   | 57.63465 | 67.78517 | 19.56468 | 14.02557 | 16.59618 | 1.919071 | 0        | 1.035907 | 3.496901 | 2.61E-16 | 1.674613 | 0.000522 | -0.8011  | 0.404134 |
| AT3G29252 | AT3G29252 | 0        | 0          | 0        | 0        | 0        | 0        | 0.976246 | 0        | 0        | 0        | 0        | 0        | 0        | NA       | 0.16673  | NA       | 0        | NA       |
| AT3G29255 | AT3G29255 | 0        | 0          | 0        | 0.824831 | 0        | 0        | 0.889303 | 1.07889  | 0        | 0        | 1.330334 | 0        | 0.150119 | NA       | 0.321758 | NA       | 0.194127 | NA       |
| AT3G29260 | SDR5      | 0        | 0          | 0        | 0        | 0.996841 | 0        | 0        | 0.976246 | 0        | 0        | 1.330334 | 0        | 0.131812 | NA       | 0.150725 | NA       | 0.186363 | NA       |
| AT3G29265 | AT3G29265 | 0        | 0          | 0        | 0        | 0        | 0        | 0.889303 | 0        | 0        | 0        | 0        | 0        | 0        | NA       | 0.160764 | NA       | 0        | NA       |
| AT3G29270 | AT3G29270 | 279.3924 | 272.9896   | 261.3938 | 279.6178 | 272.274  | 327.9606 | 332.5995 | 330.1403 | 274.3251 | 283.063  | 263.4061 | 241.3662 | 0.104388 | 0.570709 | 0.200355 | 0.264431 | -0.04541 | 0.905042 |
| AT3G29280 | AT3G29280 | 48.74506 | 35.68492   | 34.76667 | 44.54088 | 38.4231  | 35.88627 | 26.6791  | 30.20892 | 57.59851 | 62.36982 | 89.13238 | 48.68761 | -0.00573 | 0.99046  | -0.06523 | 0.893642 | 0.673077 | 0.186672 |
| AT3G29290 | EM82076   | 408.983  | 442.493    | 391.4469 | 223.1168 | 262.337  | 295.0649 | 339.7139 | 370.0592 | 365.116  | 424.1147 | 397.7699 | 439.2244 | -0.67121 | 1.66E-06 | -0.20439 | 0.220711 | 0.025384 | 0.948017 |
| AT3G29300 | AT3G29300 | 2.377808 | 0          | 3.862963 | 1.237247 | 1.987402 | 3.987363 | 0.889303 | 0        | 0        | 0.959536 | 1.330334 | 1.035907 | 0.074495 | 0.931201 | -0.83    | 0.228839 | -0.41332 | NA       |
| AT3G29305 | AT3G29305 | 0        | 0          | 1.287654 | 0        | 0.662467 | 0        | 1.778607 | 0        | 0        | 0        | 0        | 1.035907 | -0.12279 | NA       | 0.081234 | NA       | -0.04074 | NA       |
| AT3G29310 | BAG1      | 236.5919 | 205.1883   | 215.0383 | 210.3319 | 235.8383 | 244.226  | 202.7612 | 240.5925 | 314.3512 | 157.3638 | 192.8984 | 176.1041 | 0.062484 | 0.800171 | 0.196808 | 0.390463 | -0.31905 | 0.31269  |
| AT3G29320 | PHS1      | 3097.095 | 2986.828   | 2800.648 | 1711.112 | 1681.342 | 1895.991 | 2088.974 | 2417.792 | 1905.632 | 3294.086 | 3309.871 | 3248.603 | -0.74275 | 2.4E-11  | -0.46657 | 6.14E-05 | 0.147856 | 0.47565  |
| AT3G29330 | AT3G29330 | 8.322328 | 33.90067   | 30.9037  | 34.64291 | 29.81103 | 18.93997 | 30.23632 | 19.42002 | 26.35864 | 24.94793 | 23.94601 | 15.5386  | 0.223447 | 0.656112 | 0.086221 | 0.884333 | -0.12988 | 0.897035 |
| AT3G29340 | AT3G29340 | 1.188904 | 1.784246   | 0        | 0.412416 | 0        | 0.889303 | 0        | 0        | 0        | 0        | 0        | 1.035907 | -0.27726 | NA       | -0.31188 | NA       | -0.28128 | NA       |
| AT3G29350 | AHP2      | 280.5813 | 305.1061   | 306.4617 | 411.5907 | 524.6741 | 404.7174 | 371.7289 | 332.2981 | 639.4411 | 332.9589 | 395.1092 | 400.8958 | 0.567691 | 0.01635  | 0.57014  | 0.019305 | 0.326691 | 0.410204 |
| AT3G29360 | UGD2      | 751.3873 | 674.445    | 621.937  | 566.2466 | 552.4977 | 567.2024 | 568.2649 | 583.6795 | 660.9185 | 592.993  | 655.8546 | 625.6875 | -0.27896 | 0.02948  | -0.17531 | 0.22226  | -0.1289  | 0.582115 |
| AT3G29365 | ATEXP1A9  | 0        | 0          | 0        | 0        | 0        | 0        | 0        | 0        | 0        | 0        | 1.330334 | 0        | 0        | NA       | 0        | NA       | 0.172362 | NA       |
| AT3G29370 | AT3G29370 | 23.77808 | 8.92123    | 20.60247 | 5.361402 | 14.57428 | 8.971567 | 4.446517 | 6.47334  | 8.786214 | 15.35257 | 22.61568 | 27.96948 | -0.79426 | 0.109155 | -1.18195 | 0.021548 | 0.23551  | NA       |
| AT3G29375 | AT3G29375 | 143.8574 | 206.9725   | 149.3679 | 167.0283 | 162.9669 | 116.6304 | 114.7201 | 133.7824 | 170.843  | 137.2136 | 158.3097 | 175.0682 | -0.13607 | 0.621659 | -0.2356  | 0.392756 | -0.07498 | 0.89016  |
| AT3G29380 | AT3G29380 | 0        | 0          | 0        | 0        | 0        | 0        | 0.889303 | 1.07889  | 0        | 0        | 0        | 1.035907 | 0        | NA       | 0.34029  | NA       | 0.182576 | NA       |
| AT3G29385 | AT3G29385 | 0        | 0          | 0        | 0        | 0        | 0        | 0        | 0        | 0        | 0        | 0        | 0        | #N/A     | #N/A     | #N/A     | #N/A     | #N/A     | #N/A     |
| AT3G29390 | RIK       | 601.5854 | 631.6231   | 591.0333 | 614.4992 | 571.0468 | 585.1455 | 721.2251 | 677.5429 | 398.3084 | 644.8079 | 627.9176 | 562.4972 | -0.04078 | 0.876872 | -0.02208 | 0.943424 | 0.008979 | 0.987749 |
| AT3G29400 | ATEX07051 | 225.8917 | 224.815    | 213.7506 | 226.4162 | 210.0021 | 289.0838 | 272.9592 | 236.2515 | 217.8146 | 182.2558 | 209.2531 | 0        | 0.115059 | 0.5753   | 0.229793 | 0.248079 | -0.11753 | 0.746915 |
| AT3G29410 | TPS25     | 0        | 3.568492   | 3.862963 | 4.124156 | 5.962205 | 1.993682 | 5.335821 | 5.39445  | 4.88123  | 6.716749 | 2.660668 | 6.215439 | 0.443568 | 0.530991 | 0.668545 | 0.346458 | 0.68884  | NA       |
| AT3G29420 | AT3G29420 | 0        | 0          | 0        | 0        | 0        | 0        | 0        | 0        | 0        | 0        | 0        | 0        | #N/A     | #N/A     | #N/A     | #N/A     | #N/A     | #N/A     |
| AT3G29430 | AT3G29430 | 0        | 0          | 0        | 0        | 0        | 0        | 0        | 0        | 0        | 0        | 0        | 0        | #N/A     | #N/A     | #N/A     | #N/A     | #N/A     | #N/A     |
| AT3G29431 | AT3G29431 | 0        | 0          | 0        | 0        | 0        | 0        | 0        | 0        | 0.959536 | 0        | 0        | 0        | 0        | NA       | 0        | NA       | 0.171512 | NA       |
| AT3G29440 | AT3G29440 | 0        | 0          | 0        | 0        | 0        | 0        | 0        | 0        | 0        | 0        | 0        | 0        | #N/A     | #N/A     | #N/A     | #N/A     | #N/A     | #N/A     |
| AT3G29450 | AT3G29450 | 0        | 0          | 0        | 0        | 0        | 0.889303 | 0        | 0        | 0.959536 | 0        | 1.035907 | 0        | 0        | NA       | 0.161651 | NA       | 0.351496 | NA       |
| AT3G29460 | AT3G29460 | 0        | 0          | 0        | 0        | 0        | 0.889303 | 0        | 0        | 0        | 0        | 0        | 0        | 0        | NA       | 0.160764 | NA       | 0        | NA       |
| AT3G29470 | AT3G29470 | 0        | 0          | 0        | 0.662467 | 0        | 0        | 0        | 0        | 0        | 0        | 0        | 0        | 0.128567 | NA       | 0        | NA       | 0        | NA       |
| AT3G29480 | AT3G29480 | 0        | 1.784246   | 0        | 0        | 0.996841 | 0        | 2.15778  | 0        | 0        | 0        | 0        | 0        | -0.10578 | NA       | 0.081692 | NA       | -0.23857 | NA       |
| AT3G29510 | AT3G29510 | 0        | 0          | 0        | 0        | 0        | 0.889303 | 0        | 0        | 0        | 0        | 0        | 2.071813 | 0        | NA       | 0.133076 | NA       | 0.29577  | NA       |
| AT3G29515 | AT3G29515 | 1.188904 | 1.784246   | 0        | 0        | 0        | 1.778607 | 1.07889  | 0        | 0        | 1.330334 | 0        | 0        | -0.57628 | NA       | 0.040278 | NA       | -0.25636 | NA       |
| AT3G29520 | AT3G29520 | 1.188904 | 0          | 0        | 0        | 0        | 0        | 0        | 0        | 0        | 0        | 0        | 0        | -0.2184  | NA       | -0.20558 | NA       | -0.19918 | NA       |
| AT3G29525 | AT3G29525 | 0        | 0          | 0        | 0        | 0        | 0        | 0        | 0        | 0        | 0        | 0        | 0        | #N/A     | #N/A     | #N/A     | #N/A     | #N/A     | #N/A     |
| AT3G29540 | AT3G29540 | 0        | 0          | 0        | 0        | 0        | 0        | 0        | 0        | 0        | 0        | 0        | 0        | #N/A     | #N/A     | #N/A     | #N/A     | #N/A     | #N/A     |
| AT3G29545 | AT3G29545 | 0        | 0          | 0        | 0        | 0        | 0        | 0        | 0        | 0        | 0        | 0        | 0        | #N/A     | #N/A     | #N/A     | #N/A     | #N/A     | #N/A     |
| AT3G29550 | AT3G29550 | 0        | 0          | 0        | 0        | 0        | 0        | 0        | 0        | 0        | 0        | 0        | 0        | #N/A     | #N/A     | #N/A     | #N/A     | #N/A     | #N/A     |
| AT3G29560 | AT3G29560 | 0        | 1.784246   | 0        | 0        | 0        | 0        | 0        | 0        | 0        | 0        | 0        | 0        | -0.2184  | NA       | -0.20558 | NA       | -0.19918 | NA       |
| AT3G29570 | AT3G29570 | 0        | 0          | 0        | 0        | 0        | 0.889303 | 0        | 0        | 0        | 0        | 0        | 0        | 0        | NA       | 0.160764 | NA       | 0        | NA       |
| AT3G29572 | AT3G29572 | 0        | 0          | 0        | 0        | 0        | 0        | 0        | 0        | 0        | 0        | 0        | 0        | #N/A     | #N/A     | #N/A     | #N/A     | #N/A     | #N/A     |
| AT3G29575 | AFP3      | 74.90095 | 112.4075   | 124.9025 | 231.3651 | 223.9139 | 243.2291 | 149.403  | 152.1235 | 209.8929 | 177.5141 | 141.0154 | 101.5188 | 1.120362 | 2.27E-06 | 0.686927 | 0.007687 | 0.415851 | 0.308305 |
| AT3G29577 | AT3G29577 | 0        | 0          | 0        | 0        | 0        | 1.778607 | 0        | 0        | 0        | 0        | 0        | 0        | 0        | NA       | 0.248756 | NA       | 0        | NA       |
| AT3G29578 | AT3G29578 | 0        | 0          | 0        | 0        | 0        | 0        | 0        | 0        | 0        | 0        | 0        | 0        | #N/A     | #N/A     | #N/A     | #N/A     | #N/A     | #N/A     |
| AT3G29580 | AT3G29580 | 1.188904 | 0          | 0        | 0        | 0        | 0        | 0        | 0        | 1.919071 | 0        | 0        | 0        | -0.21514 | NA       | -0.19663 | NA       | 0.109769 | NA       |
| AT3G29590 | 5MAT      | 8.322328 | 3.568492</ |          |          |          |          |          |          |          |          |          |          |          |          |          |          |          |          |

|           |           |          |          |          |          |          |          |          |          |          |          |          |          |          |          |          |          |          |          |
|-----------|-----------|----------|----------|----------|----------|----------|----------|----------|----------|----------|----------|----------|----------|----------|----------|----------|----------|----------|----------|
| AT3G29760 | AT3G29760 | 463.6725 | 453.1985 | 415.9124 | 306.0124 | 327.9213 | 327.9606 | 385.0684 | 318.2725 | 280.1826 | 356.9473 | 337.9048 | 467.1938 | -0.46283 | 0.007257 | -0.428   | 0.01779  | -0.19141 | 0.540577 |
| AT3G29762 | AT3G29762 | 0        | 0        | 0        | 0        | 0        | 0        | 0        | 0        | 0        | 0        | 0        | 0        | #N/A     | #N/A     | #N/A     | #N/A     | #N/A     | #N/A     |
| AT3G29763 | AT3G29763 | 0        | 0        | 0        | 0        | 0.662467 | 0        | 0.889303 | 0        | 0        | 0        | 1.330334 | 0        | 0.09913  | NA       | 0.145297 | NA       | 0.18929  | NA       |
| AT3G29764 | AT3G29764 | 0        | 0        | 0        | 0        | 0        | 0        | 0        | 0        | 0        | 0        | 0        | 0        | #N/A     | #N/A     | #N/A     | #N/A     | #N/A     | #N/A     |
| AT3G29765 | AT3G29765 | 0        | 0        | 0        | 0        | 0        | 0        | 0        | 0        | 0        | 0        | 1.035907 | 0        | 0        | NA       | 0        | NA       | 0.172362 | NA       |
| AT3G29766 | AT3G29766 | 0        | 0        | 1.287654 | 0.412416 | 1.324935 | 0        | 2.66791  | 0        | 0        | 0        | 0        | 0        | 0.074774 | NA       | 0.206802 | NA       | -0.22298 | NA       |
| AT3G29767 | AT3G29767 | 0        | 3.568492 | 0        | 0        | 0        | 0        | 0.889303 | 2.15778  | 0        | 0        | 0        | 0        | -0.53092 | NA       | 0.0155   | NA       | -0.474   | NA       |
| AT3G29768 | AT3G29768 | 0        | 0        | 0        | 0        | 0        | 0        | 1.778607 | 0        | 0        | 0        | 0        | 0        | 0        | NA       | 0.248756 | NA       | 0        | NA       |
| AT3G29769 | AT3G29769 | 0        | 0        | 0        | 0        | 0        | 0        | 0        | 0        | 0        | 0        | 1.330334 | 0        | 0        | NA       | 0        | NA       | 0.172362 | NA       |
| AT3G29770 | MES11     | 68.95643 | 64.23286 | 68.24568 | 77.12171 | 77.50867 | 68.78201 | 69.36567 | 60.41784 | 60.52725 | 44.13864 | 42.57069 | 59.04667 | 0.149932 | 0.586545 | -0.07966 | 0.80983  | -0.44491 | 0.256453 |
| AT3G29771 | AT3G29771 | 0        | 0        | 0        | 0        | 0.662467 | 0        | 0        | 0        | 0        | 0        | 0        | 0        | 0.128567 | NA       | 0        | NA       | 0        | NA       |
| AT3G29772 | AT3G29772 | 0        | 0        | 0        | 0        | 0        | 0        | 0        | 0        | 0        | 0.959536 | 1.330334 | 1.035907 | 0        | NA       | 0        | NA       | 0.604134 | NA       |
| AT3G29773 | AT3G29773 | 0        | 0        | 0        | 0        | 0        | 0        | 1.07889  | 0        | 0        | 0        | 0        | 0        | 0        | NA       | 0.16673  | NA       | 0        | NA       |
| AT3G29774 | AT3G29774 | 0        | 0        | 0        | 0        | 0.662467 | 0        | 0.889303 | 1.07889  | 0        | 0        | 0        | 0        | 0.109123 | NA       | 0.333186 | NA       | 0        | NA       |
| AT3G29775 | AT3G29775 | 4.755616 | 0        | 1.287654 | 0.412416 | 0        | 0        | 4.446517 | 1.07889  | 1.952492 | 1.919071 | 1.330334 | 2.071813 | -1.01656 | 0.118242 | 0.145949 | 0.866582 | -0.1164  | NA       |
| AT3G29776 | AT3G29776 | 35.66712 | 42.8219  | 43.78025 | 31.756   | 29.14856 | 28.90838 | 37.35075 | 48.55005 | 36.1211  | 45.09817 | 30.59768 | 47.6517  | -0.40533 | 0.206852 | -0.00081 | 0.99853  | 0.035272 | 0.9656   |
| AT3G29777 | AT3G29777 | 0        | 0        | 0        | 0        | 0        | 0        | 1.07889  | 0        | 0        | 0        | 0        | 1.035907 | 0        | NA       | 0.157605 | NA       | 0.157555 | NA       |
| AT3G29778 | AT3G29778 | 0        | 1.784246 | 0        | 0        | 0.662467 | 0        | 0.889303 | 0        | 0        | 0        | 0        | 0        | -0.13635 | NA       | -0.08681 | NA       | -0.2518  | NA       |
| AT3G29779 | AT3G29779 | 0        | 0        | 0        | 0        | 0        | 0        | 0        | 0        | 0        | 0        | 0        | 0        | #N/A     | #N/A     | #N/A     | #N/A     | #N/A     | #N/A     |
| AT3G29780 | RALFL27   | 0        | 0        | 0        | 0        | 0        | 0        | 0        | 0        | 0        | 0        | 2.660668 | 0        | 0        | NA       | 0        | NA       | 0.322821 | NA       |
| AT3G29781 | AT3G29781 | 0        | 0        | 0        | 0        | 0        | 0        | 0        | 0        | 0        | 0        | 0        | 0        | #N/A     | #N/A     | #N/A     | #N/A     | #N/A     | #N/A     |
| AT3G29782 | AT3G29782 | 1.188904 | 0        | 0        | 0        | 0        | 0        | 0        | 0        | 0        | 0        | 0        | 2.071813 | -0.21734 | NA       | -0.1981  | NA       | 0.123077 | NA       |
| AT3G29783 | AT3G29783 | 0        | 0        | 0        | 0        | 0        | 0        | 1.07889  | 0        | 0        | 0        | 2.660668 | 0        | 0        | NA       | 0.151545 | NA       | 0.344261 | NA       |
| AT3G29784 | AT3G29784 | 0        | 1.784246 | 0        | 0        | 0        | 0        | 0        | 0        | 0.976246 | 0        | 0        | 0        | -0.266   | NA       | -0.07274 | NA       | -0.24323 | NA       |
| AT3G29785 | AT3G29785 | 0        | 0        | 0        | 0        | 0        | 0        | 0        | 0        | 0        | 0        | 0        | 0        | #N/A     | #N/A     | #N/A     | #N/A     | #N/A     | #N/A     |
| AT3G29786 | AT3G29786 | 0        | 1.784246 | 0        | 0.824831 | 0        | 3.987363 | 1.778607 | 1.07889  | 0.976246 | 0        | 2.660668 | 2.071813 | 0.376568 | 0.592561 | 0.307085 | 0.68159  | 0.39012  | NA       |
| AT3G29787 | AT3G29787 | 0        | 0        | 0        | 0        | 0        | 0        | 0        | 0        | 0        | 0.959536 | 0        | 0        | 0        | NA       | 0        | NA       | 0.171512 | NA       |
| AT3G29788 | AT3G29788 | 7.133424 | 14.27397 | 7.725926 | 1.649662 | 4.637271 | 0        | 6.225124 | 7.55223  | 5.857476 | 3.838143 | 3.991002 | 11.39497 | -1.42588 | 0.014237 | -0.38729 | 0.586008 | -0.39804 | NA       |
| AT3G29789 | AT3G29789 | 0        | 0        | 0        | 0        | 0        | 0        | 0        | 0        | 0        | 0        | 1.330334 | 0        | 0        | NA       | 0        | NA       | 0.172362 | NA       |
| AT3G29790 | AT3G29790 | 0        | 0        | 0        | 0        | 0        | 0        | 0        | 0        | 0        | 0        | 0        | 0        | #N/A     | #N/A     | #N/A     | #N/A     | #N/A     | #N/A     |
| AT3G29791 | AT3G29791 | 0        | 0        | 0        | 0        | 0        | 0        | 0        | 0        | 0.976246 | 0        | 0        | 0        | 0        | NA       | 0.16673  | NA       | 0        | NA       |
| AT3G29792 | AT3G29792 | 1.188904 | 0        | 0        | 0        | 1.987402 | 0        | 1.778607 | 1.07889  | 0        | 2.878607 | 0        | 0        | 0.077108 | NA       | 0.194386 | NA       | 0.209119 | NA       |
| AT3G29796 | AT3G29796 | 0        | 0        | 0        | 0        | 0        | 0        | 0        | 0        | 0        | 0        | 0        | 0        | #N/A     | #N/A     | #N/A     | #N/A     | #N/A     | #N/A     |
| AT3G29797 | AT3G29797 | 0        | 0        | 0        | 0        | 0        | 0        | 0        | 0        | 0        | 0        | 0        | 0        | #N/A     | #N/A     | #N/A     | #N/A     | #N/A     | #N/A     |
| AT3G29798 | AT3G29798 | 5.94452  | 3.568492 | 2.575309 | 2.474493 | 4.637271 | 3.987363 | 0        | 2.15778  | 0.976246 | 0        | 3.991002 | 1.035907 | -0.05603 | 0.948636 | -0.96188 | 0.16973  | -0.72642 | NA       |
| AT3G29800 | AT3G29800 | 2.377808 | 0        | 0        | 0        | 0        | 0        | 1.07889  | 0        | 0.959536 | 0        | 1.035907 | 0        | -0.47723 | NA       | -0.22987 | NA       | -0.05477 | NA       |
| AT3G29805 | AT3G29805 | 0        | 0        | 0        | 0        | 0        | 0        | 0        | 0        | 0        | 0        | 0        | 0        | #N/A     | #N/A     | #N/A     | #N/A     | #N/A     | #N/A     |
| AT3G29810 | COBL3     | 38.04493 | 28.54794 | 46.35556 | 31.756   | 25.83622 | 40.87047 | 34.68284 | 26.97225 | 25.3824  | 33.58375 | 33.25835 | 33.14901 | -0.22287 | 0.543111 | -0.36192 | 0.339697 | -0.18117 | 0.791193 |
| AT3G29820 | AT3G29820 | 0        | 0        | 0        | 0        | 0        | 0        | 0        | 0        | 0        | 0        | 0        | 0        | #N/A     | #N/A     | #N/A     | #N/A     | #N/A     | #N/A     |
| AT3G29830 | AT3G29830 | 0        | 0        | 0        | 0        | 0        | 0        | 0        | 0        | 0        | 0        | 0        | 1.035907 | 0        | NA       | 0        | NA       | 0.172362 | NA       |
| AT3G29970 | AT3G29970 | 1.188904 | 0        | 0        | 0        | 0        | 0        | 0.889303 | 0        | 0        | 0        | 0        | 1.035907 | -0.2447  | NA       | -0.0484  | NA       | -0.02732 | NA       |
| AT3G30110 | AT3G30110 | 0        | 1.784246 | 0        | 0.412416 | 0.662467 | 0        | 0        | 0        | 0        | 0        | 0        | 0        | -0.03134 | NA       | -0.27626 | NA       | -0.26875 | NA       |
| AT3G30120 | AT3G30120 | 5.94452  | 7.136984 | 5.150617 | 9.073143 | 7.28714  | 9.968408 | 5.358521 | 4.31556  | 1.952492 | 0.959536 | 3.991002 | 5.179533 | 0.452893 | 0.478554 | -0.43543 | 0.540923 | -0.57408 | NA       |
| AT3G30122 | AT3G30122 | 28.53369 | 37.46917 | 45.0679  | 18.97112 | 29.81103 | 24.92102 | 30.23632 | 24.81447 | 17.57243 | 37.42189 | 17.29434 | 33.14901 | -0.55017 | 0.149235 | -0.54745 | 0.184084 | -0.28041 | 0.69659  |
| AT3G30145 | AT3G30145 | 0        | 1.784246 | 0        | 0        | 0        | 0        | 1.778607 | 0        | 0        | 0        | 0        | 1.035907 | -0.2855  | NA       | 0.054081 | NA       | -0.06854 | NA       |
| AT3G30147 | AT3G30147 | 0        | 0        | 0        | 0        | 0        | 0        | 0        | 0        | 0        | 0        | 0        | 0        | #N/A     | #N/A     | #N/A     | #N/A     | #N/A     | #N/A     |
| AT3G30150 | AT3G30150 | 0        | 0        | 0        | 0.412416 | 0.662467 | 0        | 0        | 0        | 0        | 0        | 0        | 0        | 0.196313 | NA       | 0        | NA       | 0        | NA       |
| AT3G30160 | AT3G30160 | 0        | 0        | 0        | 0        | 0        | 2.66791  | 0        | 0        | 0        | 0        | 0        | 0        | 0        | NA       | 0.335767 | NA       | 0        | NA       |
| AT3G30170 | AT3G30170 | 1.188904 | 0        | 0        | 0        | 0        | 0        | 0        | 0        | 0.976246 | 0        | 0        | 0        | -0.21061 | NA       | -0.03092 | NA       | -0.19245 | NA       |
| AT3G30180 | CYP85A2   | 535.0068 | 524.5683 | 471.2815 | 167.4407 | 188.8032 | 193.3871 | 154.7388 | 130.5457 | 160.1043 | 373.2594 | 373.8238 | 450.6193 | -1.46259 | 1.3E-25  | -1.74803 | 4.45E-33 | -0.34714 | 0.104896 |
| AT3G30183 | AT3G30183 | 0        | 0        | 0        | 0        | 0        | 0        | 0        | 0        | 0        | 0        | 0        | 0        | #N/A     | #N/A     | #N/A     | #N/A     | #N/A     | #N/A     |
| AT3G30187 | AT3G30187 | 0        | 0        | 0        | 0        | 0.662467 | 0        | 0        | 0        | 0        | 0        | 0        | 0        | 0.128567 | NA       | 0        | NA       | 0        | NA       |
| AT3G30190 | AT3G30190 | 0        | 0        | 0        | 0        | 0        | 0        | 0        | 0        | 0        | 0        | 0        | 0        | #N/A     | #N/A     | #N/A     | #N/A     | #N/A     | #N/A     |
| AT3G30200 | AT3G30200 | 9.511232 | 8.92123  | 5.150617 | 1.237247 | 1.987402 | 4.984204 | 12.45025 | 9.710009 | 4.88123  | 11.51443 | 6.65167  | 8.287252 | -1.18388 | 0.03955  | 0.178169 | 0.810815 | 0.159045 | NA       |
| AT3G30210 | ATMYB121  | 0        | 0        | 0        | 0        | 0        | 0        | 0        | 0        | 0        | 0        | 0        | 0        | #N/A     | #N/A     | #N/A     | #N/A     | #N/A     | #N/A     |
| AT3G30211 | AT3G30211 | 1.188904 | 0        | 0        | 0        | 0.662467 | 0        | 0.889303 | 0        | 0        | 0.959536 | 1.330334 | 0        | -0.14029 | NA       | -0.06705 | NA       | 0.154972 | NA       |
| AT3G30212 | AT3G30212 | 0        | 0        | 0        | 0        | 0.662467 | 0        | 0.889303 | 0        | 0        | 0        | 0        | 0        | 0.097058 | NA       | 0.130384 | NA       | 0        | NA       |
| AT3G30213 | AT3G30213 | 3.566712 | 5.352738 | 0        | 0        | 0        | 0.996841 | 0.889303 | 0        | 0        | 0.959536 | 0        | 1.035907 | -1.03791 | 0.082825 | -0.95524 | 0.119882 | -0.74193 | NA       |
| AT3G30214 | AT3G30214 | 15.45575 | 23.1952  | 12.87654 | 11.96605 | 13.91181 | 14.95261 | 10.67164 | 14.02557 | 22.45366 | 21.10978 | 14.63367 | 22.78994 | -0.28527 | 0.564225 | -0.0859  | 0.886075 | 0.207461 | 0.822744 |
| AT3G30216 | AT3G30216 | 0        | 0        | 0        | 0        | 0        | 0        | 0        | 0        | 0        | 0        | 0        | 0        | #N/A     | #N/A     | #N/A     | #N/A     | #N/A     | #N/A     |
| AT3G30218 | AT3G30218 | 1.188904 | 0        | 0        | 0        | 0        | 0        | 0        | 1.07889  | 0        | 0        | 1.330334 | 0        | -0.24973 | NA       | -0.03207 | NA       | -0.00489 | NA       |
| AT3G30219 | AT3G30219 | 0        | 0        | 0        | 0        | 0        | 1.993682 | 0.889303 | 4.31556  | 0        | 0        | 0        | 0        | 0.241016 | NA       | 0.642133 | NA       | 0        | NA       |
| AT3G30220 | AT3G30220 | 0        | 0        | 0        | 0        | 0        | 0        | 0        | 0        | 0        | #N/A     | #N/A     | #N/A     | #N/A     | #N/A     | #N/A     | #N/A     | #N/A     | #N/A     |
| AT3G30222 | AT3G30222 | 0        | 0        | 0        | 0        | 0        | 0        | 0        | 0        | 0        | 0        | 0        | 0        | #N/A     | #N/A     | #N/A     | #N/A     | #N/A     | #N/A     |
| AT3G30230 | AT3G30230 | 0        | 0        | 0        | 0        | 0        | 0        | 0        | 0        | 0        | 0        | 1.330334 | 0        | 0        | NA       | 0        | NA       | 0.172362 | NA       |
| AT3G30235 | AT3G30235 | 0        | 0        | 0        | 0        | 0        | 0        | 0        | 0        | 0        | 0        | 0        | 0        | #N/A     | #N/A     | #N/A     | #N/A     | #N/A     | #N/A     |
| AT3G30240 | AT3G30240 | 0        | 0        | 0        | 0        | 0        | 0        | 0        | 0        | 0        | 0        | 0        | 0        | #N/A     | #N/A     | #N/A     | #N/A     | #N/A     | #N/A     |
| AT3G30245 | AT3G30245 | 0        | 0        | 0        | 0        | 0        | 0.889303 | 0        | 0        | 0        | 0        | 0        | 0        | 0        | NA       | 0.160764 | NA       | 0        | NA       |
| AT3G30247 | AT3G30247 | 0        | 0        | 0        | 0        | 0        | 0        | 0        | 0        | 0        | 0        | 0        | 0        | #N/A     | #N/A     | #N/A     | #N/A     | #N/A     | #N/A     |
| AT3G30250 | AT3G30250 | 0        | 0        | 0        | 0        | 0        | 0        | 0        | 0        | 0        | 0        | 0        | 1.035907 | 0        | NA       | 0        | NA       | 0.172362 | NA       |
| AT3G3026  |           |          |          |          |          |          |          |          |          |          |          |          |          |          |          |          |          |          |          |

|           |           |          |          |          |          |          |          |          |          |          |          |          |          |          |          |          |          |          |          |
|-----------|-----------|----------|----------|----------|----------|----------|----------|----------|----------|----------|----------|----------|----------|----------|----------|----------|----------|----------|----------|
| AT3G30433 | AT3G30433 | 0        | 0        | 0        | 0        | 0.662467 | 0        | 0.889303 | 0        | 0        | 0        | 1.330334 | 0        | 0.09913  | NA       | 0.145297 | NA       | 0.18929  | NA       |
| AT3G30436 | AT3G30436 | 0        | 0        | 0        | 0        | 0        | 0        | 0        | 0        | 0        | 0        | 0        | 0        | #N/A     | #N/A     | #N/A     | #N/A     | #N/A     | #N/A     |
| AT3G30440 | AT3G30440 | 1.188904 | 0        | 0        | 0        | 0        | 0        | 0        | 0        | 0        | 0        | 1.330334 | 0        | -0.22006 | NA       | -0.20393 | NA       | 0.001199 | NA       |
| AT3G30450 | AT3G30450 | 1.188904 | 0        | 0        | 0        | 0.662467 | 1.993682 | 2.66791  | 0        | 0.976246 | 0        | 2.660668 | 1.035907 | 0.127686 | 0.860388 | 0.335902 | 0.629666 | 0.295536 | NA       |
| AT3G30455 | AT3G30455 | 0        | 0        | 0        | 0        | 1.324935 | 0        | 1.778607 | 1.07889  | 0        | 0        | 0        | 1.035907 | 0.199452 | NA       | 0.432059 | NA       | 0.157932 | NA       |
| AT3G30456 | AT3G30456 | 0        | 0        | 0        | 0        | 0        | 0        | 0.889303 | 0        | 0        | 0        | 0        | 0        | 0        | NA       | 0.160764 | NA       | 0        | NA       |
| AT3G30460 | AT3G30460 | 5.94452  | 7.136984 | 1.287654 | 2.886909 | 1.324935 | 1.993682 | 8.003731 | 3.23667  | 12.6912  | 9.595356 | 6.65167  | 6.215439 | -0.7281  | 0.264999 | 0.57262  | 0.408639 | 0.495102 | NA       |
| AT3G30465 | AT3G30465 | 0        | 1.784246 | 0        | 0        | 0        | 0        | 0.889303 | 0        | 0        | 0        | 0        | 0        | -0.26522 | NA       | -0.08117 | NA       | -0.24296 | NA       |
| AT3G30470 | AT3G30470 | 0        | 0        | 0        | 0        | 0.662467 | 0        | 0        | 0        | 0        | 0        | 0        | 0        | 0.128567 | NA       | 0        | NA       | 0        | NA       |
| AT3G30480 | AT3G30480 | 0        | 0        | 0        | 0        | 0        | 0        | 0        | 0        | 0        | 0        | 0        | 0        | #N/A     | #N/A     | #N/A     | #N/A     | #N/A     | #N/A     |
| AT3G30490 | AT3G30490 | 0        | 0        | 0        | 0        | 0        | 0        | 0        | 1.07889  | 0        | 0        | 0        | 0        | 0        | NA       | 0.16673  | NA       | 0        | NA       |
| AT3G30500 | AT3G30500 | 0        | 0        | 0        | 0        | 0.662467 | 0        | 0        | 0        | 0        | 0        | 0        | 0        | 0.128567 | NA       | 0        | NA       | 0        | NA       |
| AT3G30505 | AT3G30505 | 0        | 0        | 0        | 0        | 0        | 0        | 0        | 0        | 0        | 0        | 0        | 0        | #N/A     | #N/A     | #N/A     | #N/A     | #N/A     | #N/A     |
| AT3G30510 | AT3G30510 | 0        | 0        | 0        | 0        | 0        | 0        | 0        | 0        | 0        | 0        | 0        | 0        | #N/A     | #N/A     | #N/A     | #N/A     | #N/A     | #N/A     |
| AT3G30520 | AT3G30520 | 0        | 0        | 0        | 0        | 0        | 0        | 0.889303 | 0        | 0        | 0        | 0        | 0        | 0        | NA       | 0.160764 | NA       | 0        | NA       |
| AT3G30530 | ATBZ1P42  | 0        | 1.784246 | 3.862963 | 3.299325 | 2.649869 | 4.984204 | 2.66791  | 1.07889  | 1.952492 | 4.797678 | 7.982004 | 6.215439 | 0.488446 | 0.495685 | -0.01553 | 0.986113 | 1.053467 | NA       |
| AT3G30540 | AT3G30540 | 0        | 0        | 0        | 0        | 0        | 0        | 0        | 0        | 0        | 0        | 0        | 0        | #N/A     | #N/A     | #N/A     | #N/A     | #N/A     | #N/A     |
| AT3G30550 | AT3G30550 | 1.188904 | 0        | 0        | 0        | 0        | 0        | 0.889303 | 0        | 0        | 0        | 0        | 0        | -0.20902 | NA       | -0.03919 | NA       | -0.19148 | NA       |
| AT3G30560 | AT3G30560 | 1.188904 | 0        | 0        | 0        | 0.662467 | 0        | 2.66791  | 1.07889  | 0        | 0        | 1.330334 | 0        | -0.15328 | NA       | 0.370799 | NA       | -0.02219 | NA       |
| AT3G30570 | AT3G30570 | 1.188904 | 0        | 0        | 0        | 0.662467 | 0        | 0.889303 | 0        | 0        | 0        | 0        | 0        | -0.09199 | NA       | -0.04588 | NA       | -0.20606 | NA       |
| AT3G30580 | AT3G30580 | 0        | 0        | 1.287654 | 0        | 0        | 0        | 0        | 0        | 0        | 0.959536 | 0        | 0        | -0.22221 | NA       | -0.2076  | NA       | -0.03666 | NA       |
| AT3G30582 | AT3G30582 | 0        | 0        | 0        | 0        | 0        | 0.996841 | 0.889303 | 0        | 0        | 0        | 0        | 0        | 0.133397 | NA       | 0.133015 | NA       | 0        | NA       |
| AT3G30585 | AT3G30585 | 0        | 0        | 0        | 0.412416 | 0        | 0        | 0.889303 | 0        | 0        | 0        | 0        | 0        | 0.066991 | NA       | 0.136991 | NA       | 0        | NA       |
| AT3G30587 | AT3G30587 | 0        | 0        | 0        | 0        | 0        | 0        | 0.889303 | 0        | 0        | 0        | 0        | 0        | 0        | NA       | 0.160764 | NA       | 0        | NA       |
| AT3G30590 | AT3G30590 | 0        | 0        | 0        | 0        | 0        | 0        | 0        | 1.07889  | 0        | 0        | 0        | 0        | 0        | NA       | 0.16673  | NA       | 0        | NA       |
| AT3G30600 | AT3G30600 | 0        | 0        | 0        | 0        | 0        | 0        | 0        | 0        | 0        | 0        | 0        | 0        | #N/A     | #N/A     | #N/A     | #N/A     | #N/A     | #N/A     |
| AT3G30610 | AT3G30610 | 1.188904 | 0        | 0        | 0        | 0        | 0        | 0        | 0        | 0.976246 | 0        | 0        | 0        | -0.21061 | NA       | -0.03092 | NA       | -0.19245 | NA       |
| AT3G30620 | AT3G30620 | 0        | 0        | 0        | 0        | 0        | 0        | 0        | 0        | 0        | 0        | 0        | 0        | #N/A     | #N/A     | #N/A     | #N/A     | #N/A     | #N/A     |
| AT3G30630 | AT3G30630 | 0        | 1.784246 | 0        | 0        | 0        | 0        | 0.889303 | 0        | 0        | 0        | 0        | 0        | -0.26522 | NA       | -0.08117 | NA       | -0.24296 | NA       |
| AT3G30640 | AT3G30640 | 0        | 0        | 0        | 0        | 0.662467 | 0        | 1.778607 | 0        | 0        | 0        | 0        | 0        | 0.091702 | NA       | 0.255494 | NA       | 0        | NA       |
| AT3G30645 | AT3G30645 | 0        | 0        | 0        | 0        | 0        | 0        | 0        | 0        | 0        | 0        | 0        | 0        | #N/A     | #N/A     | #N/A     | #N/A     | #N/A     | #N/A     |
| AT3G30650 | AT3G30650 | 0        | 0        | 0        | 0        | 0        | 0        | 0        | 1.07889  | 0        | 0        | 0        | 0        | 0        | NA       | 0.16673  | NA       | 0        | NA       |
| AT3G30655 | AT3G30655 | 0        | 0        | 0        | 0        | 0        | 0        | 0.889303 | 0        | 0        | 0        | 2.660668 | 1.035907 | 0        | NA       | 0.154264 | NA       | 0.552425 | NA       |
| AT3G30660 | AT3G30660 | 0        | 0        | 0        | 0        | 0        | 0        | 0        | 0        | 0        | 0        | 0        | 0        | #N/A     | #N/A     | #N/A     | #N/A     | #N/A     | #N/A     |
| AT3G30663 | AT3G30663 | 0        | 0        | 0        | 0        | 0.662467 | 0        | 0.889303 | 0        | 0        | 0.959536 | 0        | 0        | 0.100335 | NA       | 0.144523 | NA       | 0.157063 | NA       |
| AT3G30665 | AT3G30665 | 0        | 0        | 0        | 0.412416 | 0        | 0        | 0        | 0        | 0        | 0        | 0        | 0        | 0.095918 | NA       | 0        | NA       | 0        | NA       |
| AT3G30668 | AT3G30668 | 0        | 0        | 0        | 0        | 1.987402 | 0        | 0.889303 | 0        | 0.976246 | 0.959536 | 0        | 0        | 0.310532 | NA       | 0.28417  | NA       | 0.147888 | NA       |
| AT3G30670 | AT3G30670 | 0        | 0        | 0        | 0        | 0        | 0        | 0        | 0        | 0        | 0        | 0        | 0        | #N/A     | #N/A     | #N/A     | #N/A     | #N/A     | #N/A     |
| AT3G30680 | AT3G30680 | 0        | 0        | 0        | 0        | 0        | 0        | 0        | 0        | 0.976246 | 0        | 0        | 1.035907 | 0        | NA       | 0.14724  | NA       | 0.156349 | NA       |
| AT3G30685 | AT3G30685 | 1.188904 | 0        | 0        | 0        | 0        | 0        | 0        | 0        | 0        | 0        | 0        | 0        | -0.2184  | NA       | -0.20558 | NA       | -0.19918 | NA       |
| AT3G30690 | AT3G30690 | 0        | 0        | 0        | 0        | 0        | 0        | 0        | 0        | 0.976246 | 0        | 0        | 0        | 0        | NA       | 0.16673  | NA       | 0        | NA       |
| AT3G30695 | AT3G30695 | 1.188904 | 0        | 0        | 0        | 0        | 0        | 0        | 0        | 0        | 0.959536 | 1.330334 | 0        | -0.27703 | NA       | -0.24518 | NA       | 0.165416 | NA       |
| AT3G30700 | AT3G30700 | 0        | 0        | 0        | 0        | 0        | 0        | 0        | 0        | 0        | 0        | 0        | 0        | #N/A     | #N/A     | #N/A     | #N/A     | #N/A     | #N/A     |
| AT3G30703 | AT3G30703 | 0        | 0        | 0        | 0        | 0        | 0        | 0        | 0        | 0        | 0        | 0        | 0        | #N/A     | #N/A     | #N/A     | #N/A     | #N/A     | #N/A     |
| AT3G30705 | AT3G30705 | 0        | 0        | 0        | 0        | 0        | 0        | 0        | 0        | 0        | 0        | 0        | 0        | #N/A     | #N/A     | #N/A     | #N/A     | #N/A     | #N/A     |
| AT3G30708 | AT3G30708 | 0        | 0        | 0        | 0        | 0        | 0        | 0        | 0        | 0.976246 | 1.919071 | 0        | 0        | 0        | NA       | 0.140845 | NA       | 0.281244 | NA       |
| AT3G30709 | AT3G30709 | 0        | 0        | 0        | 0        | 0        | 0        | 0.889303 | 0        | 0        | 0        | 0        | 0        | 0        | NA       | 0.160764 | NA       | 0        | NA       |
| AT3G30710 | AT3G30710 | 0        | 0        | 0        | 0        | 0        | 0        | 0.889303 | 0        | 0        | 0        | 0        | 0        | 0        | NA       | 0.160764 | NA       | 0        | NA       |
| AT3G30711 | AT3G30711 | 0        | 1.784246 | 0        | 0        | 0        | 0        | 0        | 0        | 0        | 0        | 0        | 0        | -0.2184  | NA       | -0.20558 | NA       | -0.19918 | NA       |
| AT3G30712 | AT3G30712 | 0        | 0        | 0        | 0        | 0        | 0        | 0        | 0        | 0        | 0        | 0        | 0        | #N/A     | #N/A     | #N/A     | #N/A     | #N/A     | #N/A     |
| AT3G30713 | AT3G30713 | 0        | 0        | 0        | 0        | 0        | 0        | 0        | 1.07889  | 0        | 0        | 0        | 0        | 0        | NA       | 0.16673  | NA       | 0        | NA       |
| AT3G30714 | AT3G30714 | 0        | 0        | 0        | 0        | 0        | 0        | 0        | 0        | 0        | 0        | 0        | 0        | #N/A     | #N/A     | #N/A     | #N/A     | #N/A     | #N/A     |
| AT3G30715 | AT3G30715 | 0        | 0        | 0        | 0        | 0        | 0        | 0        | 0        | 0        | 0.959536 | 0        | 0        | 0        | NA       | 0        | NA       | 0.171512 | NA       |
| AT3G30716 | AT3G30716 | 0        | 0        | 0        | 0        | 0        | 0        | 2.66791  | 0        | 0        | 0        | 1.330334 | 0        | 0        | NA       | 0.369916 | NA       | 0.167994 | NA       |
| AT3G30717 | AT3G30717 | 0        | 0        | 0        | 0        | 0        | 0        | 0        | 0        | 0        | 0        | 0        | 0        | #N/A     | #N/A     | #N/A     | #N/A     | #N/A     | #N/A     |
| AT3G30718 | AT3G30718 | 0        | 0        | 0        | 0        | 0.662467 | 0        | 0        | 0        | 0.959536 | 1.330334 | 0        | 0        | 0.109173 | NA       | 0        | NA       | 0.37189  | NA       |
| AT3G30719 | AT3G30719 | 0        | 0        | 0        | 0        | 0.662467 | 0        | 0.889303 | 0        | 0        | 0        | 0        | 0        | 0.097058 | NA       | 0.130384 | NA       | 0        | NA       |
| AT3G30720 | Q05       | 23.77808 | 28.54794 | 41.20494 | 36.70499 | 39.08557 | 22.92734 | 20.45398 | 16.18335 | 19.52492 | 71.96517 | 57.20436 | 38.32854 | 0.092426 | 0.839038 | -0.65724 | 0.106183 | 0.779424 | 0.119909 |
| AT3G30721 | AT3G30721 | 1.188904 | 0        | 0        | 0        | 0        | 0        | 0.889303 | 0        | 0        | 0.959536 | 1.330334 | 0        | -0.29747 | NA       | -0.0612  | NA       | 0.161183 | NA       |
| AT3G30722 | AT3G30722 | 0        | 0        | 0        | 0        | 0        | 0        | 0        | 0        | 0        | 0        | 0        | 0        | #N/A     | #N/A     | #N/A     | #N/A     | #N/A     | #N/A     |
| AT3G30724 | AT3G30724 | 0        | 0        | 0        | 0        | 0        | 0        | 0        | 0        | 0        | 0        | 0        | 0        | #N/A     | #N/A     | #N/A     | #N/A     | #N/A     | #N/A     |
| AT3G30725 | GDU6      | 0        | 0        | 0        | 0.412416 | 0        | 1.993682 | 0        | 0        | 0        | 0        | 0        | 0        | 0.374519 | NA       | 0        | NA       | 0        | NA       |
| AT3G30727 | AT3G30727 | 0        | 0        | 0        | 0.412416 | 1.324935 | 0        | 0        | 1.07889  | 0        | 0        | 0        | 0        | 0.316618 | NA       | 0.168182 | NA       | 0        | NA       |
| AT3G30730 | AT3G30730 | 0        | 0        | 0        | 0        | 0        | 0        | 0.889303 | 0        | 0        | 2.878607 | 0        | 2.071813 | 0        | NA       | 0.145018 | NA       | 0.753933 | NA       |
| AT3G30733 | AT3G30733 | 0        | 0        | 0        | 0        | 0        | 0        | 0        | 0        | 0        | 0        | 0        | 0        | #N/A     | #N/A     | #N/A     | #N/A     | #N/A     | #N/A     |
| AT3G30737 | AT3G30737 | 21.40027 | 24.97944 | 14.1642  | 10.31039 | 5.299738 | 7.974726 | 8.893035 | 4.31556  | 8.786214 | 17.27164 | 14.63367 | 13.46678 | -1.1199  | 0.012224 | -1.19375 | 0.012584 | -0.33923 | NA       |
| AT3G30740 | AT3G30740 | 0        | 0        | 0        | 0        | 0        | 0        | 0        | 0        | 0        | 0.959536 | 0        | 0        | 0        | NA       | 0        | NA       | 0.171512 | NA       |
| AT3G30742 | AT3G30742 | 0        | 0        | 0        | 0        | 0        | 0        | 0        | 0        | 0        | 0        | 0        | 0        | #N/A     | #N/A     | #N/A     | #N/A     | #N/A     | #N/A     |
| AT3G30743 | AT3G30743 | 0        | 0        | 0        | 0        | 0        | 0.996841 | 0.889303 | 0        | 0        | 0        | 1.330334 | 1.035907 | 0.127357 | NA       | 0.152228 | NA       | 0.373633 | NA       |
| AT3G30744 | AT3G30744 | 0        | 0        | 0        | 0        | 0        | 0        | 0.889303 | 1.07889  | 0        | 0        | 0        | 0        | 0        | NA       | 0.3225   | NA       | 0        | NA       |
| AT3G30745 | AT3G30745 | 0        | 1.784246 | 0        | 0        | 0        | 0        | 0        | 0        | 0        | 0        | 0        | 0        | -0.2184  | NA       | -0.20558 | NA       | -0.19918 | NA       |
| AT3G30746 | AT3G30746 | 0        | 0        | 0        | 0        | 0.662467 | 0        | 0        | 0        | 0.976246 | 0        | 0        | 0        | 0.097788 | NA       | 0.140077 | NA       | 0        | NA       |
| AT3G30747 | AT3G30747 | 0        | 0        | 0        | 0        | 0.996841 | 1.778607 | 0        | 0        | 0        | 0        | 0        | 0        | 0.124069 | NA       | 0.253321 | NA       | 0        | NA       |
| AT3G30748 | AT3G30748 | 0        | 0        | 0        | 0        | 0        | 0        | 1.778607 | 0        | 0        | 0        | 0        | 0        | 0        | NA       | 0.248756 | NA       | 0        | NA       |
| AT3G30749 | AT3G30749 | 2.377808 | 0        | 0        | 0.412416 | 0.662467 | 0        | 1.778607 |          |          |          |          |          |          |          |          |          |          |          |

|           |           |          |          |          |          |          |          |          |          |          |          |          |          |          |          |           |          |          |          |
|-----------|-----------|----------|----------|----------|----------|----------|----------|----------|----------|----------|----------|----------|----------|----------|----------|-----------|----------|----------|----------|
| AT3G30820 | AT3G30820 | 0        | 0        | 0        | 0        | 0.662467 | 0        | 0        | 0        | 0        | 0        | 0        | 0.128567 | NA       | 0        | NA        | 0        | NA       |          |
| AT3G30821 | AT3G30821 | 1.188904 | 0        | 0        | 0        | 0        | 0.996841 | 0.889303 | 0        | 0        | 0        | 0        | -0.05691 | NA       | -0.04692 | NA        | -0.20555 | NA       |          |
| AT3G30825 | AT3G30825 | 0        | 0        | 0        | 0        | 0.662467 | 0        | 0.889303 | 1.07889  | 0        | 0        | 0        | 0.109123 | NA       | 0.333186 | NA        | 0        | NA       |          |
| AT3G30827 | AT3G30827 | 0        | 0        | 0        | 0        | 0        | 0        | 0        | 0        | 0        | 0        | 0        | #N/A     | #N/A     | #N/A     | #N/A      | #N/A     | #N/A     |          |
| AT3G30830 | AT3G30830 | 0        | 0        | 0        | 0        | 0        | 0        | 0        | 0        | 0.959536 | 1.330334 | 0        | 0        | NA       | 0        | NA        | 0.366448 | NA       |          |
| AT3G30831 | AT3G30831 | 0        | 0        | 0        | 0        | 0.662467 | 0        | 0        | 0        | 0        | 0        | 0        | 0.128567 | NA       | 0        | NA        | 0        | NA       |          |
| AT3G30832 | AT3G30832 | 0        | 0        | 0        | 0        | 0        | 0        | 1.778607 | 0        | 0        | 0        | 0        | 0        | NA       | 0.248756 | NA        | 0        | NA       |          |
| AT3G30833 | AT3G30833 | 2.377808 | 5.352738 | 1.287654 | 0.824831 | 0        | 0        | 1.778607 | 2.15778  | 0.976246 | 1.919071 | 0        | 1.035907 | -1.10513 | 0.087011 | -0.37672  | 0.632642 | -0.62945 | NA       |
| AT3G30834 | AT3G30834 | 0        | 0        | 0        | 0        | 0        | 0        | 0        | 0        | 0        | 0        | 0        | #N/A     | #N/A     | #N/A     | #N/A      | #N/A     | #N/A     |          |
| AT3G30835 | AT3G30835 | 0        | 0        | 0        | 0        | 0        | 0        | 0        | 0        | 0        | 0        | 0        | #N/A     | #N/A     | #N/A     | #N/A      | #N/A     | #N/A     |          |
| AT3G30836 | AT3G30836 | 0        | 0        | 0        | 0        | 0        | 0        | 0        | 1.07889  | 0        | 0        | 0        | 1.035907 | 0        | NA       | 0.157605  | NA       | 0.157555 | NA       |
| AT3G30837 | AT3G30837 | 1.188904 | 0        | 0        | 0.412416 | 0        | 0        | 0.889303 | 0        | 0        | 0        | 0        | 0        | -0.12978 | NA       | -0.04528  | NA       | -0.2092  | NA       |
| AT3G30838 | AT3G30838 | 1.188904 | 1.784246 | 0        | 0        | 0        | 0        | 0        | 0        | 0.976246 | 0.959536 | 2.660668 | 1.035907 | -0.63875 | NA       | -0.32566  | NA       | 0.274115 | NA       |
| AT3G30839 | AT3G30839 | 0        | 0        | 0        | 0        | 0        | 0        | 0        | 0        | 0        | 0        | 0        | 0        | #N/A     | #N/A     | #N/A      | #N/A     | #N/A     | #N/A     |
| AT3G30840 | AT3G30840 | 0        | 0        | 0        | 0.412416 | 0        | 0        | 0        | 0        | 0        | 0        | 0        | 0        | 0.095918 | NA       | 0         | NA       | 0        | NA       |
| AT3G30841 | AT3G30841 | 93.92341 | 85.64381 | 91.42346 | 93.20592 | 92.74542 | 112.643  | 104.0485 | 97.10009 | 78.09968 | 103.6298 | 99.77505 | 101.5188 | 0.118202 | 0.637171 | 0.038146  | 0.899235 | 0.161509 | 0.701857 |
| AT3G30842 | AT3G30842 | 0        | 0        | 0        | 1.649662 | 3.312336 | 4.984204 | 0.889303 | 4.31556  | 1.952492 | 0        | 1.330334 | 0        | 1.266041 | 0.041228 | 0.969658  | 0.142386 | 0.141289 | NA       |
| AT3G30843 | AT3G30843 | 0        | 0        | 0        | 5.773818 | 2.649869 | 2.990522 | 6.225124 | 7.55223  | 2.928738 | 0        | 0        | 0        | 1.452785 | 0.020209 | 1.759647  | 0.004857 | 0        | NA       |
| AT3G30844 | AT3G30844 | 0        | 0        | 0        | 2.062078 | 3.312336 | 2.990522 | 2.66791  | 3.23667  | 1.952492 | 0        | 1.330334 | 0        | 1.192858 | 0.057399 | 1.106125  | 0.090196 | 0.142958 | NA       |
| AT3G30845 | AT3G30845 | 0        | 0        | 0        | 0        | 0        | 0        | 0        | 0        | 0        | 0.959536 | 0        | 0        | 0        | NA       | 0         | NA       | 0.171512 | NA       |
| AT3G30846 | AT3G30846 | 0        | 0        | 0        | 0.412416 | 0        | 0        | 1.778607 | 0        | 0        | 0        | 0        | 0        | 0.060593 | NA       | 0.260815  | NA       | 0        | NA       |
| AT3G30847 | AT3G30847 | 0        | 0        | 0        | 0        | 0        | 0        | 0        | 0        | 0        | 0        | 0        | 0        | #N/A     | #N/A     | #N/A      | #N/A     | #N/A     | #N/A     |
| AT3G30848 | AT3G30848 | 0        | 0        | 0        | 0        | 0        | 0        | 0        | 0        | 0        | 0        | 0        | 0        | #N/A     | #N/A     | #N/A      | #N/A     | #N/A     | #N/A     |
| AT3G30849 | AT3G30849 | 0        | 0        | 0        | 0        | 0        | 0        | 0        | 0        | 0        | 0        | 0        | 0        | #N/A     | #N/A     | #N/A      | #N/A     | #N/A     | #N/A     |
| AT3G30852 | AT3G30852 | 0        | 0        | 0        | 0        | 0        | 0        | 0.889303 | 0        | 0        | 0        | 0        | 0        | 0        | NA       | 0.160764  | NA       | 0        | NA       |
| AT3G30859 | AT3G30859 | 0        | 0        | 0        | 0        | 0        | 0        | 0.889303 | 0        | 0.976246 | 0        | 0        | 0        | 0        | NA       | 0.309898  | NA       | 0        | NA       |
| AT3G30867 | AT3G30867 | 13.07794 | 1.784246 | 19.31482 | 16.08421 | 11.26194 | 17.94313 | 17.78607 | 17.26224 | 20.50117 | 21.10978 | 11.97301 | 12.43088 | 0.262072 | 0.633813 | 0.525482  | 0.325307 | 0.291248 | NA       |
| AT3G30875 | AT3G30875 | 9.511232 | 16.05821 | 7.725926 | 5.361402 | 5.299738 | 12.95893 | 8.893035 | 11.86779 | 7.809968 | 11.51443 | 21.28534 | 14.50269 | -0.44966 | 0.424769 | -0.14986  | 0.827047 | 0.445312 | NA       |
| AT3G30885 | AT3G30885 | 1.188904 | 1.784246 | 0        | 0.824831 | 1.324935 | 1.993682 | 0        | 2.15778  | 1.952492 | 2.878607 | 2.660668 | 5.179533 | 0.102552 | 0.930303 | 0.137579  | 0.874181 | 0.89012  | NA       |
| AT3G31005 | AT3G31005 | 0        | 0        | 0        | 0        | 0.662467 | 0        | 0.889303 | 0        | 0        | 0        | 0        | 0        | 0.097058 | NA       | 0.130384  | NA       | 0        | NA       |
| AT3G31023 | AT3G31023 | 0        | 0        | 0        | 0        | 0        | 1.778607 | 0        | 0        | 0.959536 | 0        | 0        | 0        | 0        | NA       | 0.262373  | NA       | 0.143228 | NA       |
| AT3G31051 | AT3G31051 | 0        | 0        | 0        | 0        | 0        | 0        | 0        | 0        | 0        | 0        | 0        | 0        | #N/A     | #N/A     | #N/A      | #N/A     | #N/A     | #N/A     |
| AT3G31068 | AT3G31068 | 0        | 0        | 0        | 0        | 0        | 0        | 0        | 0        | 0        | 0        | 0        | 0        | #N/A     | #N/A     | #N/A      | #N/A     | #N/A     | #N/A     |
| AT3G31161 | AT3G31161 | 1.188904 | 0        | 0        | 0.412416 | 0.662467 | 0.996841 | 0        | 0        | 0.976246 | 3.838143 | 0        | 0        | 0.094774 | NA       | -0.07363  | NA       | 0.383281 | NA       |
| AT3G31300 | AT3G31300 | 0        | 0        | 0        | 0        | 0        | 0        | 0        | 0        | 0        | 0        | 0        | 0        | #N/A     | #N/A     | #N/A      | #N/A     | #N/A     | #N/A     |
| AT3G31310 | AT3G31310 | 0        | 0        | 0        | 0        | 0.662467 | 0        | 0        | 0        | 0        | 0        | 0        | 0        | 0.128567 | NA       | 0         | NA       | 0        | NA       |
| AT3G31312 | AT3G31312 | 0        | 0        | 0        | 0        | 0        | 0        | 0        | 0        | 0        | 0        | 0        | 0        | #N/A     | #N/A     | #N/A      | #N/A     | #N/A     | #N/A     |
| AT3G31314 | AT3G31314 | 0        | 0        | 0        | 0        | 0        | 0        | 1.778607 | 0        | 0.976246 | 0        | 0        | 1.035907 | 0        | NA       | 0.463781  | NA       | 0.176341 | NA       |
| AT3G31317 | AT3G31317 | 0        | 0        | 0        | 1.324935 | 0        | 0        | 1.778607 | 1.07889  | 0        | 0        | 0        | 0        | 0.209087 | NA       | 0.42985   | NA       | 0        | NA       |
| AT3G31320 | AT3G31320 | 0        | 0        | 0        | 0        | 0        | 0        | 0        | 0        | 0        | 0        | 0        | 0        | #N/A     | #N/A     | #N/A      | #N/A     | #N/A     | #N/A     |
| AT3G31330 | AT3G31330 | 0        | 0        | 0        | 0        | 0        | 0        | 0        | 0        | 0        | 0        | 0        | 0        | #N/A     | #N/A     | #N/A      | #N/A     | #N/A     | #N/A     |
| AT3G31340 | AT3G31340 | 0        | 0        | 0        | 0        | 0        | 0.889303 | 1.07889  | 0        | 0.959536 | 1.330334 | 0        | 0        | 0        | NA       | 0.362417  | NA       | 0.398177 | NA       |
| AT3G31350 | AT3G31350 | 0        | 0        | 0        | 0        | 0        | 0.889303 | 0        | 0        | 0        | 0        | 1.035907 | 0        | 0        | NA       | 0.137906  | NA       | 0.15538  | NA       |
| AT3G31355 | AT3G31355 | 0        | 0        | 0        | 0        | 0        | 0        | 0        | 0        | 0        | 0        | 0        | 0        | #N/A     | #N/A     | #N/A      | #N/A     | #N/A     | #N/A     |
| AT3G31356 | AT3G31356 | 0        | 0        | 0        | 0        | 0        | 0        | 1.07889  | 0        | 0        | 0        | 0        | 0        | 0        | NA       | 0.16673   | NA       | 0        | NA       |
| AT3G31357 | AT3G31357 | 0        | 0        | 0        | 0        | 0        | 0        | 0        | 0        | 0        | 0        | 0        | 0        | #N/A     | #N/A     | #N/A      | #N/A     | #N/A     | #N/A     |
| AT3G31358 | AT3G31358 | 0        | 0        | 0        | 0        | 0        | 0.889303 | 0        | 0        | 0        | 0        | 0        | 0        | 0        | NA       | 0.160764  | NA       | 0        | NA       |
| AT3G31359 | AT3G31359 | 0        | 3.568492 | 0        | 0        | 0.662467 | 0.889303 | 0        | 1.952492 | 0        | 0        | 0        | 0        | -0.38567 | NA       | -0.00455  | NA       | -0.47462 | NA       |
| AT3G31360 | AT3G31360 | 0        | 0        | 0        | 0        | 0        | 0        | 0        | 0        | 0        | 0        | 0        | 0        | #N/A     | #N/A     | #N/A      | #N/A     | #N/A     | #N/A     |
| AT3G31365 | AT3G31365 | 0        | 1.784246 | 0        | 0.412416 | 0        | 0.889303 | 0        | 0        | 0        | 0        | 0        | 0        | -0.17556 | NA       | -0.08634  | NA       | -0.25627 | NA       |
| AT3G31367 | AT3G31367 | 1.188904 | 0        | 0        | 0        | 0        | 0        | 0        | 0        | 0        | 0        | 0        | 0        | -0.2184  | NA       | -0.20558  | NA       | -0.19918 | NA       |
| AT3G31370 | AT3G31370 | 0        | 0        | 0        | 0        | 0        | 0        | 0        | 0        | 0        | 0        | 0        | 0        | #N/A     | #N/A     | #N/A      | #N/A     | #N/A     | #N/A     |
| AT3G31373 | AT3G31373 | 0        | 0        | 0        | 0        | 0        | 0.889303 | 0        | 0        | 0        | 0        | 0        | 0        | 0        | NA       | 0.160764  | NA       | 0        | NA       |
| AT3G31374 | AT3G31374 | 0        | 0        | 0        | 0        | 0.996841 | 0.889303 | 0        | 0        | 0        | 0        | 0        | 0        | 0.133397 | NA       | 0.133015  | NA       | 0        | NA       |
| AT3G31375 | AT3G31375 | 0        | 0        | 0.412416 | 0        | 0        | 0        | 1.07889  | 0        | 0.959536 | 0        | 1.035907 | 0.057886 | NA       | 0.177727 | NA        | 0.356639 | NA       | NA       |
| AT3G31377 | AT3G31377 | 0        | 0        | 0        | 0        | 0        | 0        | 0        | 0        | 0        | 0        | 0        | 0        | #N/A     | #N/A     | #N/A      | #N/A     | #N/A     | #N/A     |
| AT3G31380 | AT3G31380 | 0        | 0        | 0        | 0        | 0        | 0        | 0        | 0        | 0        | 0        | 0        | 0        | #N/A     | #N/A     | #N/A      | #N/A     | #N/A     | #N/A     |
| AT3G31390 | AT3G31390 | 0        | 1.784246 | 0        | 0        | 0.996841 | 0        | 0        | 0        | 0        | 0        | 0        | 0        | -0.08504 | NA       | -0.24249  | NA       | -0.23746 | NA       |
| AT3G31395 | AT3G31395 | 0        | 0        | 0        | 0        | 0        | 0        | 1.07889  | 0.976246 | 0        | 0        | 1.035907 | 0        | 0        | NA       | 0.348621  | NA       | 0.182599 | NA       |
| AT3G31400 | AT3G31400 | 0        | 0        | 0        | 0        | 0        | 0        | 1.07889  | 0        | 0        | 0        | 0        | 0        | 0        | NA       | 0.16673   | NA       | 0        | NA       |
| AT3G31401 | AT3G31401 | 0        | 0        | 0        | 0        | 0        | 0        | 0        | 0        | 0        | 0        | 0        | 0        | #N/A     | #N/A     | #N/A      | #N/A     | #N/A     | #N/A     |
| AT3G31402 | AT3G31402 | 0        | 0        | 0        | 0        | 0        | 0        | 0        | 0.976246 | 0        | 0        | 0        | 0        | 0        | NA       | 0.16673   | NA       | 0        | NA       |
| AT3G31403 | AT3G31403 | 0        | 0        | 0        | 0        | 0        | 0        | 2.15778  | 0        | 0        | 0        | 0        | 0        | 0        | NA       | 0.266481  | NA       | 0        | NA       |
| AT3G31406 | AT3G31406 | 0        | 0        | 0        | 0        | 0        | 0        | 0        | 0        | 0        | 0        | 0        | 0        | #N/A     | #N/A     | #N/A      | #N/A     | #N/A     | #N/A     |
| AT3G31410 | AT3G31410 | 0        | 0        | 0        | 0        | 0        | 0        | 0        | 0        | 0        | 0        | 0        | 0        | #N/A     | #N/A     | #N/A      | #N/A     | #N/A     | #N/A     |
| AT3G31420 | AT3G31420 | 1.188904 | 0        | 0        | 0        | 0        | 0        | 0        | 0        | 0        | 0        | 0        | 0        | -0.2184  | NA       | -0.20558  | NA       | -0.19918 | NA       |
| AT3G31422 | AT3G31422 | 0        | 1.784246 | 0        | 0        | 0        | 0        | 1.07889  | 0        | 0        | 0        | 0        | 0        | -0.26712 | NA       | -0.06363  | NA       | -0.24374 | NA       |
| AT3G31425 | AT3G31425 | 0        | 0        | 0        | 0        | 0        | 0.889303 | 0        | 0        | 0        | 0        | 0        | 0        | 0        | NA       | 0.160764  | NA       | 0        | NA       |
| AT3G31430 | AT3G31430 | 0        | 0        | 0        | 0        | 0        | 0        | 1.07889  | 0        | 0        | 0        | 0        | 0        | 0        | NA       | 0.16673   | NA       | 0        | NA       |
| AT3G31440 | AT3G31440 | 0        | 0        | 1.987402 | 0        | 1.778607 | 0        | 0        | 0        | 0        | 0        | 3.10772  | 0.230993 | NA       | 0.209555 | NA        | 0.350785 | NA       | NA       |
| AT3G31442 | SADHU7-2  | 0        | 0        | 0        | 0        | 0        | 0        | 0        | 0        | 0        | 0        | 0        | 0        | #N/A     | #N/A     | #N/A      | #N/A     | #N/A     | #N/A     |
| AT3G31450 | AT3G31450 | 0        | 1.784246 | 0        | 0        | 0.889303 | 1.07889  | 0        | 0        | 2.660668 | 0        | 0        | 0        | -0.33016 | NA       | -0.072877 | NA       | 0.137365 | NA       |
| AT3G31460 | AT3G31460 | 0        | 0        | 0        | 0        | 0        | 0        | 0        | 0        | 0        | 0        | 0        | 0        | #N/A     | #N/A     | #N/A      | #N/A     | #N/A     | #N/A     |
| AT3G31470 | AT3G31470 | 0        | 0        | 0        | 0        | 0        | 0        | 0        | 0        | 0        | 0        | 0        | 0        | #N/A     | #N/A     | #N/A      | #N/A     | #N/A     | #N/A     |
| AT3G31475 | AT3G31475 | 0        | 0        | 0        | 0        | 0</      |          |          |          |          |          |          |          |          |          |           |          |          |          |





|           |           |          |          |          |          |          |          |          |          |          |          |          |          |          |          |          |          |          |          |          |          |    |
|-----------|-----------|----------|----------|----------|----------|----------|----------|----------|----------|----------|----------|----------|----------|----------|----------|----------|----------|----------|----------|----------|----------|----|
| AT3G33293 | AT3G33293 | 0        | 0        | 0        | 0        | 0        | 0        | 0        | 0        | 1.07889  | 0        | 0        | 0        | 0        | 0        | NA       | 0.16673  | NA       | 0        | NA       |          |    |
| AT3G33377 | AT3G33377 | 0        | 0        | 0        | 0        | 0        | 0        | 0.996841 | 0.889303 | 0        | 0        | 0        | 0        | 0        | 1.035907 | 0.133712 | NA       | 0.142442 | NA       | 0.162585 | NA       |    |
| AT3G33393 | AT3G33393 | 0        | 0        | 0        | 0        | 0        | 0        | 0        | 0        | 0        | 0        | 0        | 0        | 0        | 0        | NA       | NA       | NA       | NA       | NA       | NA       |    |
| AT3G33448 | AT3G33448 | 0        | 0        | 1.287654 | 0        | 0        | 0        | 0        | 0        | 0        | 0        | 0        | 0        | 0        | 0        | -0.2184  | NA       | -0.20558 | NA       | -0.19918 | NA       |    |
| AT3G33494 | AT3G33494 | 0        | 0        | 0        | 0        | 0        | 0        | 0        | 0        | 0        | 0        | 0        | 0.959536 | 0        | 0        | 0        | 0        | 0        | 0        | 0        | 0.171512 | NA |
| AT3G33520 | ARP6      | 170.0133 | 192.6986 | 173.8333 | 135.6847 | 115.9318 | 170.4598 | 177.8607 | 175.8591 | 166.9381 | 220.6932 | 198.2198 | 164.7091 | -0.34565 | 0.087754 | -0.03739 | 0.891201 | 0.123952 | 0.757455 | 0.123952 | 0.757455 |    |
| AT3G33528 | AT3G33528 | 1.188904 | 0        | 1.287654 | 4.536571 | 5.962205 | 6.977885 | 5.335821 | 3.23667  | 0        | 0        | 3.991002 | 2.071813 | 1.274546 | 0.047042 | 0.621095 | 0.040985 | 0.324636 | 0.324636 | 0.324636 | 0.324636 |    |
| AT3G33530 | AT3G33530 | 888.1112 | 777.9313 | 770.0173 | 560.8852 | 513.4121 | 646.9497 | 599.3905 | 784.353  | 469.5743 | 754.195  | 707.7377 | 593.5744 | -0.49149 | 0.011594 | -0.3866  | 0.062754 | -0.23988 | 0.479944 | -0.23988 | 0.479944 |    |
| AT3G33537 | AT3G33537 | 0        | 0        | 0        | 0.412416 | 0.662467 | 0        | 0        | 0        | 0        | 0        | 1.330334 | 1.035907 | 0.223338 | NA       | 0        | NA       | 0        | NA       | 0.405264 | NA       |    |
| AT3G33545 | AT3G33545 | 0        | 0        | 0        | 0.412416 | 0        | 0        | 0        | 0        | 0        | 0        | 0        | 0        | 0.095918 | NA       | 0        | NA       | 0        | NA       | 0        | NA       |    |
| AT3G33555 | AT3G33555 | 0        | 0        | 0        | 0        | 0        | 0        | 0.889303 | 0        | 0        | 0        | 0        | 1.035907 | 0        | NA       | 0.137906 | NA       | 0        | 1.5538   | 0        | NA       |    |
| AT3G33565 | AT3G33565 | 2.377808 | 0        | 0        | 0        | 0.662467 | 0        | 0.889303 | 0        | 0        | 0        | 0        | 1.035907 | -0.28767 | NA       | -0.22746 | NA       | -0.20325 | NA       | -0.20325 | NA       |    |
| AT3G33570 | AT3G33570 | 0        | 0        | 0        | 0        | 0        | 0        | 0        | 0        | 0        | 0        | 1.330334 | 0        | 0        | NA       | 0        | NA       | 0        | NA       | 0.172362 | NA       |    |
| AT3G33572 | AT3G33572 | 0        | 0        | 0        | 0        | 0        | 0        | 0        | 0        | 0        | 0        | 0        | 0        | #N/A     | #N/A     | #N/A     | #N/A     | #N/A     | #N/A     | #N/A     | #N/A     |    |
| AT3G33575 | AT3G33575 | 1.188904 | 0        | 0        | 0        | 0        | 0        | 1.778607 | 0        | 0        | 0.959536 | 1.330334 | 0        | -0.28956 | NA       | 0.096314 | NA       | 0.148724 | NA       | 0.148724 | NA       |    |
| AT3G33585 | AT3G33585 | 0        | 0        | 0        | 0        | 0.662467 | 0        | 0        | 0        | 0        | 0        | 0        | 0        | 0.128567 | NA       | 0        | NA       | 0        | NA       | 0        | NA       |    |
| AT3G33595 | AT3G33595 | 0        | 0        | 0        | 0.662467 | 0        | 0        | 2.15778  | 0        | 0        | 0        | 0        | 2.071813 | 0.071135 | NA       | 0.284097 | NA       | 0.284523 | NA       | 0.284523 | NA       |    |
| AT3G34299 | AT3G34299 | 0        | 0        | 0        | 0        | 0        | 0        | 0.889303 | 0        | 0.976246 | 0        | 1.330334 | 1.035907 | 0        | NA       | 0.353908 | NA       | 0.404864 | NA       | 0.404864 | NA       |    |
| AT3G35003 | AT3G35003 | 0        | 0        | 0        | 0        | 0        | 0        | 0.889303 | 0        | 0.976246 | 0        | 0        | 0        | 0        | NA       | 0.309898 | NA       | 0        | NA       | 0        | NA       |    |
| AT3G35707 | AT3G35707 | 0        | 0        | 0        | 0        | 0        | 0        | 0        | 0        | 0        | 0        | 0        | 0        | #N/A     | #N/A     | #N/A     | #N/A     | #N/A     | #N/A     | #N/A     | #N/A     |    |
| AT3G36411 | AT3G36411 | 0        | 0        | 0        | 0        | 0        | 0        | 0        | 0        | 0        | 0        | 0        | 0        | #N/A     | #N/A     | #N/A     | #N/A     | #N/A     | #N/A     | #N/A     | #N/A     |    |
| AT3G36659 | AT3G36659 | 0        | 0        | 0        | 0        | 0        | 0        | 0        | 1.07889  | 0        | 0        | 1.330334 | 1.035907 | 0        | NA       | 0.179864 | NA       | 0.38345  | NA       | 0.38345  | NA       |    |
| AT3G37820 | AT3G37820 | 0        | 1.784246 | 0        | 0        | 0        | 0        | 0        | 1.07889  | 0        | 0        | 0        | 1.035907 | -0.29378 | NA       | -0.07122 | NA       | -0.06723 | NA       | -0.06723 | NA       |    |
| AT3G38525 | AT3G38525 | 0        | 0        | 0        | 0        | 0.662467 | 0        | 0        | 0        | 0        | 0        | 0        | 0        | 0.128567 | NA       | 0        | NA       | 0        | NA       | 0        | NA       |    |
| AT3G39230 | AT3G39230 | 0        | 0        | 0        | 0        | 0        | 0        | 0        | 0        | 0        | 0        | 0        | 1.035907 | 0        | NA       | 0        | NA       | 0        | NA       | 0.172362 | NA       |    |
| AT3G39935 | AT3G39935 | 0        | 0        | 0        | 0        | 0        | 0        | 0        | 1.07889  | 0        | 0        | 0        | 0        | 0        | NA       | 0.16673  | NA       | 0        | NA       | 0        | NA       |    |
| AT3G40640 | AT3G40640 | 0        | 0        | 0        | 0        | 0        | 0        | 0        | 0        | 0        | 0        | 2.660668 | 0        | 0        | NA       | 0        | NA       | 0        | NA       | 0.322821 | NA       |    |
| AT3G41345 | AT3G41345 | 0        | 0        | 0        | 0        | 0        | 0        | 0        | 0        | 0        | 0        | 0        | 0        | #N/A     | #N/A     | #N/A     | #N/A     | #N/A     | #N/A     | #N/A     | #N/A     |    |
| AT3G41761 | AT3G41761 | 0        | 0        | 0        | 0        | 0        | 0        | 0        | 0        | 0        | 0        | 0        | 0        | #N/A     | #N/A     | #N/A     | #N/A     | #N/A     | #N/A     | #N/A     | #N/A     |    |
| AT3G41762 | AT3G41762 | 17.83356 | 16.05821 | 0        | 9.073143 | 16.56168 | 10.96525 | 33.79353 | 22.65669 | 13.66744 | 6.716749 | 19.95501 | 14.50269 | 0.078418 | 0.913943 | 0.831367 | 0.159452 | 0.200454 | NA       | 0.200454 | NA       |    |
| AT3G41768 | AT3G41768 | 31433.43 | 26008.95 | 14743.64 | 14016.77 | 14219.86 | 15349.35 | 8821.001 | 14617.88 | 26486.53 | 14170.42 | 6728.829 | 21349    | -0.61057 | 0.228686 | -0.44702 | 0.421614 | -0.64799 | 0.40574  | -0.64799 | 0.40574  |    |
| AT3G41979 | AT3G41979 | 41.61164 | 35.68492 | 18.02716 | 35.46774 | 26.49869 | 42.86415 | 46.24378 | 50.70783 | 53.69353 | 21.10978 | 18.62468 | 52.83123 | 0.113746 | 0.820895 | 0.595987 | 0.165804 | -0.02573 | 0.982852 | -0.02573 | 0.982852 |    |
| AT3G42047 | AT3G42047 | 0        | 0        | 0        | 0        | 0        | 0        | 0        | 0        | 0        | 0        | 0        | 0        | #N/A     | #N/A     | #N/A     | #N/A     | #N/A     | #N/A     | #N/A     | #N/A     |    |
| AT3G42050 | VHA-H     | 2516.91  | 1950.181 | 1975.262 | 1530.474 | 1519.7   | 1645.784 | 1643.433 | 1718.672 | 1462.417 | 1996.794 | 1948.939 | 1855.309 | -0.45301 | 0.000506 | -0.41392 | 0.002027 | -0.15087 | 0.52809  | -0.15087 | 0.52809  |    |
| AT3G42052 | AT3G42052 | 179.5245 | 181.9931 | 190.5728 | 311.3738 | 347.7953 | 267.1533 | 242.7799 | 225.488  | 252.8477 | 224.5313 | 311.2981 | 199.93   | 0.73196  | 8.34E-05 | 0.375325 | 0.075412 | 0.39541  | 0.180128 | 0.39541  | 0.180128 |    |
| AT3G42054 | AT3G42054 | 0        | 0        | 0        | 0        | 0        | 0        | 0        | 0        | 0        | 0        | 0        | 1.035907 | 0        | NA       | 0        | NA       | 0        | NA       | 0.172362 | NA       |    |
| AT3G42057 | AT3G42057 | 0        | 0        | 0        | 0.824831 | 0        | 0        | 3.557214 | 0        | 0        | 0        | 0        | 0        | 0.113262 | NA       | 0.445228 | NA       | 0        | NA       | 0        | NA       |    |
| AT3G42060 | AT3G42060 | 0        | 0        | 0        | 0        | 0.662467 | 0        | 0        | 0        | 0        | 0        | 0        | 0        | 0.128567 | NA       | 0        | NA       | 0        | NA       | 0        | NA       |    |
| AT3G42065 | AT3G42065 | 0        | 1.784246 | 0        | 0        | 0        | 0        | 0        | 0        | 0        | 0        | 0        | 0        | -0.2184  | NA       | -0.20558 | NA       | -0.19918 | NA       | -0.19918 | NA       |    |
| AT3G42070 | AT3G42070 | 0        | 0        | 0        | 0        | 0        | 0        | 0        | 0        | 0        | 0        | 0        | 0        | #N/A     | #N/A     | #N/A     | #N/A     | #N/A     | #N/A     | #N/A     | #N/A     |    |
| AT3G42080 | AT3G42080 | 0        | 0        | 0        | 0        | 0        | 0        | 0        | 0        | 0        | 0        | 0        | 1.035907 | 0        | NA       | 0        | NA       | 0        | NA       | 0.172362 | NA       |    |
| AT3G42083 | AT3G42083 | 0        | 0        | 0        | 0        | 0        | 0        | 0        | 0        | 0        | 0        | 0        | 0        | #N/A     | #N/A     | #N/A     | #N/A     | #N/A     | #N/A     | #N/A     | #N/A     |    |
| AT3G42086 | AT3G42086 | 0        | 0        | 0        | 0        | 0.662467 | 0        | 1.778607 | 3.23667  | 0        | 0        | 0        | 0        | 0.074691 | NA       | 0.726831 | NA       | 0        | NA       | 0        | NA       |    |
| AT3G42090 | AT3G42090 | 0        | 0        | 0        | 0        | 0        | 0        | 0        | 0        | 0        | 0        | 0        | 0        | #N/A     | #N/A     | #N/A     | #N/A     | #N/A     | #N/A     | #N/A     | #N/A     |    |
| AT3G42100 | AT3G42100 | 1.188904 | 0        | 0        | 0        | 0.662467 | 0        | 0.889303 | 1.07889  | 0.976246 | 0        | 1.330334 | 1.035907 | -0.19489 | NA       | 0.284297 | NA       | 0.161225 | NA       | 0.161225 | NA       |    |
| AT3G42110 | AT3G42110 | 0        | 0        | 0        | 0        | 0        | 0        | 0        | 0        | 0        | 0        | 1.330334 | 1.035907 | 0        | NA       | 0        | NA       | 0.375122 | NA       | 0.375122 | NA       |    |
| AT3G42115 | AT3G42115 | 0        | 0        | 0        | 0.412416 | 0        | 0        | 0        | 0        | 0.976246 | 0        | 0        | 0        | 0.065752 | NA       | 0.143461 | NA       | 0        | NA       | 0        | NA       |    |
| AT3G42120 | AT3G42120 | 0        | 0        | 0        | 0        | 0        | 0        | 0        | 0        | 0        | 0        | 0        | 0        | #N/A     | #N/A     | #N/A     | #N/A     | #N/A     | #N/A     | #N/A     | #N/A     |    |
| AT3G42130 | AT3G42130 | 0        | 0        | 0        | 0        | 0        | 0        | 0        | 0        | 0        | 0        | 0        | 0        | #N/A     | #N/A     | #N/A     | #N/A     | #N/A     | #N/A     | #N/A     | #N/A     |    |
| AT3G42140 | AT3G42140 | 0        | 0        | 0        | 0        | 0        | 0        | 0.889303 | 1.07889  | 0.976246 | 0        | 1.330334 | 0        | 0        | NA       | 0.54558  | NA       | 0.220218 | NA       | 0.220218 | NA       |    |
| AT3G42148 | AT3G42148 | 0        | 0        | 0        | 0        | 0        | 0        | 0        | 0        | 0        | 0.959536 | 0        | 0        | 0        | NA       | 0        | NA       | 0        | NA       | 0.171512 | NA       |    |
| AT3G42150 | AT3G42150 | 65.38972 | 60.66437 | 61.80741 | 76.7093  | 78.83361 | 53.8294  | 52.46891 | 62.57562 | 76.14719 | 59.49121 | 54.54369 | 70.44164 | 0.16605  | 0.58373  | 0.018266 | 0.961461 | -0.02317 | 0.975777 | -0.02317 | 0.975777 |    |
| AT3G42155 | AT3G42155 | 0        | 0        | 0        | 0        | 0        | 0        | 0        | 0        | 0        | 0        | 0        | 0        | #N/A     | #N/A     | #N/A     | #N/A     | #N/A     | #N/A     | #N/A     | #N/A     |    |
| AT3G42160 | AT3G42160 | 0        | 0        | 0        | 0        | 0        | 0        | 0        | 0        | 0        | 0        | 0        | 1.035907 | 0        | NA       | 0        | NA       | 0        | NA       | 0.172362 | NA       |    |
| AT3G42170 | HAT       | 596.8298 | 426.4348 | 390.1593 | 304.7751 | 303.41   | 334.9385 | 241.8905 | 327.9825 | 318.2562 | 401.0859 | 379.1452 | 409.1831 | -0.57608 | 0.001797 | -0.66033 | 0.000412 | -0.24592 | 0.446263 | -0.24592 | 0.446263 |    |
| AT3G42174 | AT3G42174 | 1.188904 | 0        | 1.287654 | 0        | 0        | 0        | 0        | 1.07889  | 1.952492 | 0.959536 | 0        | 0        | -0.54684 | NA       | 0.082319 | NA       | -0.25764 | NA       | -0.25764 | NA       |    |
| AT3G42178 | AT3G42178 | 0        | 0        | 0        | 0        | 0        | 0        | 0.889303 | 1.07889  | 0        | 0        | 1.330334 | 1.035907 | 0        | NA       | 0.361969 | NA       | 0.404406 | NA       | 0.404406 | NA       |    |
| AT3G42179 | AT3G42179 | 0        | 0        | 0        | 0        | 0        | 0        | 0        | 0        | 0        | 0        | 0        | 0        | #N/A     | #N/A     | #N/A     | #N/A     | #N/A     | #N/A     | #N/A     | #N/A     |    |
| AT3G42180 | AT3G42180 | 0        | 0        | 3.862963 | 0.412416 | 0.662467 | 0        | 1.778607 | 2.15778  | 0        | 0        | 2.660668 | 1.035907 | -0.45787 | 0.490312 | 0.001977 | 0.998157 | -0.05863 | NA       | -0.05863 | NA       |    |
| AT3G42181 | AT3G42181 | 0        | 0        | 0        | 0        | 0.662467 | 0.996841 | 0        | 0        | 0        | 0        | 0        | 0        | 0.262313 | NA       | 0        | NA       | 0        | NA       | 0        | NA       |    |
| AT3G42182 | AT3G42182 | 0        | 0        | 1.287654 | 0        | 0        | 0        | 0.889303 | 2.15778  | 0        | 0        | 1.330334 | 2.071813 | -0.34976 | NA       | 0.26369  | NA       | 0.305231 | NA       | 0.305231 | NA       |    |
| AT3G42186 | AT3G42186 | 1.188904 | 0        | 0        | 0        | 0        | 0        | 0        | 0        | 0.976246 | 0        | 1.330334 | 0        | -0.24905 | NA       | -0.04113 | NA       | -0.00465 | NA       | -0.00465 | NA       |    |
| AT3G42190 | AT3G42190 | 0        | 0        | 0        | 0        | 0        | 0        | 1.778607 | 1.07889  | 0        | 0        | 0        | 0        | 0        | NA       | 0.460477 | NA       | 0        | NA       | 0        | NA       |    |
| AT3G42200 | AT3G42200 | 0        | 0        | 0        | 0        | 0        | 0        | 0        | 0        | 0        | 0        | 0        | 0        | #N/A     | #N/A     | #N/A     | #N/A     | #N/A     | #N/A     | #N/A     | #N/A     |    |
| AT3G42203 | AT3G42203 | 0        |          |          |          |          |          |          |          |          |          |          |          |          |          |          |          |          |          |          |          |    |









|           |           |          |          |          |          |          |          |          |          |          |          |          |          |          |           |          |          |          |          |
|-----------|-----------|----------|----------|----------|----------|----------|----------|----------|----------|----------|----------|----------|----------|----------|-----------|----------|----------|----------|----------|
| AT3G43960 | AT3G43960 | 52.31177 | 33.90067 | 36.05432 | 24.33252 | 17.88662 | 20.93366 | 20.45398 | 18.34113 | 34.16861 | 32.62421 | 27.93701 | 43.50807 | -0.8783  | 0.010816  | -0.6948  | 0.06458  | -0.21951 | 0.757199 |
| AT3G43970 | AT3G43970 | 0        | 0        | 0        | 0        | 0        | 0        | 0        | 0        | 0        | 0        | 0        | 0        | #N/A     | #N/A      | #N/A     | #N/A     | #N/A     | #N/A     |
| AT3G43980 | RPS29A    | 79.65656 | 73.15409 | 81.12222 | 98.15491 | 108.6446 | 88.71883 | 58.69403 | 55.02339 | 145.4607 | 64.28889 | 77.15937 | 93.23159 | 0.313567 | 0.393502  | 0.134889 | 0.7581   | 0.00502  | 0.99927  |
| AT3G43990 | AT3G43990 | 0        | 0        | 0        | 0        | 0        | 0.996841 | 0        | 0        | 0.976246 | 0        | 0        | 0        | 0.133781 | NA        | 0.142196 | NA       | 0        | NA       |
| AT3G44000 | AT3G44000 | 0        | 0        | 0        | 0        | 0        | 0.889303 | 0        | 0        | 0        | 0        | 0        | 1.035907 | 0        | NA        | 0.137906 | NA       | 0.15538  | NA       |
| AT3G44005 | AT3G44005 | 0        | 0        | 0        | 0        | 0        | 0        | 0        | 0        | 0.959536 | 0        | 0        | 0        | 0        | NA        | 0        | NA       | 0.171512 | NA       |
| AT3G44006 | AT3G44006 | 0        | 0        | 0        | 0        | 0.412416 | 0        | 0        | 0        | 0        | 0        | 0        | 2.660668 | 0.007479 | NA        | 0.021611 | 0.021611 | 1.103891 | NA       |
| AT3G44010 | RPS29A    | 430.3832 | 362.2019 | 399.1728 | 845.8643 | 747.2631 | 556.2372 | 369.0609 | 323.667  | 778.0681 | 655.3628 | 788.888  | 479.6247 | 0.801568 | 0.0066427 | 0.284201 | 0.421614 | 0.648179 | 1.29042  |
| AT3G44020 | AT3G44020 | 121.2682 | 89.2123  | 115.8889 | 125.3743 | 165.6168 | 94.69987 | 165.4104 | 79.83786 | 205.0117 | 181.3522 | 180.9254 | 147.0987 | 0.222651 | 0.53594   | 0.430717 | 0.213456 | 0.594374 | 0.200126 |
| AT3G44030 | AT3G44030 | 0        | 0        | 0        | 0        | 0        | 0        | 0        | 0        | 0        | 0        | 0        | 0        | #N/A     | #N/A      | #N/A     | #N/A     | #N/A     | #N/A     |
| AT3G44035 | AT3G44035 | 1.188904 | 0        | 0        | 0        | 0        | 0        | 0.889303 | 0        | 0        | 0        | 0        | 0        | -0.20902 | NA        | -0.03919 | NA       | -0.19148 | NA       |
| AT3G44042 | SADHU3-1  | 0        | 0        | 0        | 0.412416 | 0        | 0        | 0.889303 | 0        | 0        | 0        | 0        | 1.035907 | 0.066177 | NA        | 0.148539 | NA       | 0.168189 | NA       |
| AT3G44045 | AT3G44045 | 0        | 0        | 0        | 2.886909 | 2.649869 | 0        | 0.889303 | 3.23667  | 1.952492 | 0        | 0        | 0        | 0.885334 | 0.141552  | 0.848468 | 0.1727   | 0        | NA       |
| AT3G44050 | AT3G44050 | 129.5905 | 96.34929 | 104.3    | 85.78244 | 103.3449 | 100.6809 | 95.15547 | 83.07453 | 84.9334  | 148.728  | 145.0064 | 139.8474 | -0.20687 | 0.355388  | -0.32811 | 0.152848 | 0.37174  | 0.225633 |
| AT3G44060 | AT3G44060 | 1.188904 | 0        | 0        | 0.824831 | 0.662467 | 0        | 0        | 0        | 0        | 0        | 0        | 0        | 0.081256 | NA        | -0.24347 | NA       | -0.03396 | NA       |
| AT3G44070 | AT3G44070 | 0        | 0        | 0        | 0        | 0        | 0.889303 | 1.07889  | 0        | 0        | 0        | 0        | 1.035907 | 0        | NA        | 0.34029  | NA       | 0.182576 | NA       |
| AT3G44080 | AT3G44080 | 0        | 0        | 0        | 0        | 0        | 0.889303 | 0        | 0        | 0        | 0        | 0        | 0        | 0        | NA        | 0.160764 | NA       | 0        | NA       |
| AT3G44090 | AT3G44090 | 0        | 0        | 0        | 0        | 0        | 0        | 0        | 0        | 0        | 0        | 0        | 0        | #N/A     | #N/A      | #N/A     | #N/A     | #N/A     | #N/A     |
| AT3G44091 | AT3G44091 | 0        | 0        | 0        | 0        | 0        | 0        | 0        | 0        | 0        | 0        | 0        | 0        | #N/A     | #N/A      | #N/A     | #N/A     | #N/A     | #N/A     |
| AT3G44093 | AT3G44093 | 2.377808 | 0        | 0        | 0        | 0        | 0.889303 | 2.15778  | 0        | 0        | 0        | 0        | 0        | -0.45322 | NA        | 0.087266 | NA       | -0.40101 | NA       |
| AT3G44096 | AT3G44096 | 0        | 5.352738 | 2.575309 | 0.824831 | 3.974804 | 1.993682 | 2.66791  | 0        | 1.952492 | 0        | 3.991002 | 6.215439 | -0.07226 | 0.933733  | -0.2667  | 0.747728 | 0.218264 | NA       |
| AT3G44100 | AT3G44100 | 115.3237 | 126.6815 | 121.0395 | 257.7597 | 208.6772 | 122.6114 | 127.1704 | 149.9657 | 209.8929 | 142.9708 | 99.77505 | 114.9856 | 0.67545  | 0.016409  | 0.40222  | 0.205138 | -0.0145  | 0.986817 |
| AT3G44110 | ATJ3      | 1575.298 | 1545.157 | 1619.869 | 1914.433 | 1699.229 | 1774.377 | 1839.969 | 1894.531 | 1782.625 | 1508.39  | 1492.635 | 1621.194 | 0.184163 | 0.071971  | 0.21688  | 0.037313 | -0.03633 | 0.874874 |
| AT3G44115 | AT3G44115 | 0        | 0        | 0        | 0        | 0        | 0        | 0        | 0        | 0        | 0        | 0        | 0        | #N/A     | #N/A      | #N/A     | #N/A     | #N/A     | #N/A     |
| AT3G44117 | AT3G44117 | 0        | 1.784246 | 0        | 0        | 0.662467 | 0        | 0.889303 | 0        | 0        | 0        | 0        | 0        | -0.13635 | NA        | -0.08681 | NA       | -0.2518  | NA       |
| AT3G44120 | AT3G44120 | 5.94452  | 7.136984 | 9.01358  | 8.248311 | 11.26194 | 7.974726 | 13.33955 | 8.63112  | 10.73871 | 13.4335  | 17.29434 | 14.50269 | 0.232091 | 0.697384  | 0.455451 | 0.438565 | 0.839118 | NA       |
| AT3G44130 | AT3G44130 | 0        | 0        | 0        | 0        | 0        | 0        | 0.889303 | 0        | 0.976246 | 0        | 0        | 0        | 0        | NA        | 0.309898 | NA       | 0        | NA       |
| AT3G44140 | AT3G44140 | 0        | 0        | 0        | 0        | 0        | 0        | 0        | 0        | 0        | 0        | 0        | 0        | #N/A     | #N/A      | #N/A     | #N/A     | #N/A     | #N/A     |
| AT3G44150 | AT3G44150 | 111.757  | 98.13353 | 127.4778 | 162.4917 | 170.9166 | 153.5135 | 134.2848 | 103.5734 | 161.0806 | 86.35821 | 163.6311 | 93.23159 | 0.503268 | 0.055709  | 0.227268 | 0.468526 | 0.003516 | 0.996198 |
| AT3G44160 | AT3G44160 | 177.1467 | 203.404  | 200.8741 | 191.7732 | 191.453  | 172.4535 | 190.3109 | 193.1213 | 179.6293 | 260.9937 | 256.7545 | 199.93   | -0.0548  | 0.800187  | -0.04149 | 0.862733 | 0.301012 | 0.256608 |
| AT3G44170 | AT3G44170 | 0        | 0        | 0        | 0        | 0        | 0        | 0        | 0        | 0        | 0        | 0        | 0        | #N/A     | #N/A      | #N/A     | #N/A     | #N/A     | #N/A     |
| AT3G44171 | AT3G44171 | 0        | 0        | 0        | 0.662467 | 0        | 0        | 0        | 0        | 0        | 0        | 0        | 0        | 0.128567 | NA        | 0        | NA       | 0        | NA       |
| AT3G44175 | AT3G44175 | 0        | 0        | 0        | 0        | 0        | 1.778607 | 1.07889  | 0        | 0        | 0        | 0        | 0        | 0        | NA        | 0.460477 | NA       | 0        | NA       |
| AT3G44180 | AT3G44180 | 0        | 1.784246 | 0        | 0        | 0        | 0        | 0        | 0        | 0        | 0        | 0        | 0        | -0.2184  | NA        | -0.20558 | NA       | -0.19918 | NA       |
| AT3G44190 | AT3G44190 | 161.6909 | 206.9725 | 180.2716 | 200.0216 | 186.1533 | 198.3713 | 150.2923 | 169.3857 | 245.0377 | 155.4448 | 139.6851 | 171.9605 | 0.095636 | 0.710835  | 0.046052 | 0.875924 | -0.21585 | 0.581855 |
| AT3G44200 | NEK5      | 49.6831  | 314.0273 | 302.5988 | 169.5028 | 166.9418 | 206.346  | 150.2923 | 176.938  | 123.9832 | 269.6295 | 329.9228 | 258.9766 | -0.91999 | 1.05E-06  | -1.17329 | 7.8E-10  | -0.27188 | 0.416253 |
| AT3G44205 | AT3G44205 | 34.47821 | 53.52738 | 45.0679  | 29.69392 | 24.51129 | 33.89259 | 30.23632 | 36.68226 | 25.3824  | 33.58375 | 37.24935 | 40.40035 | -0.54986 | 0.080277  | -0.47812 | 0.168068 | -0.2234  | 0.717573 |
| AT3G44210 | AT3G44210 | 0        | 0        | 0        | 0        | 0        | 0        | 0        | 0        | 0        | 0        | 0        | 0        | #N/A     | #N/A      | #N/A     | #N/A     | #N/A     | #N/A     |
| AT3G44212 | AT3G44212 | 0        | 0        | 0        | 0        | 0        | 0        | 0        | 0        | 0        | 0        | 0        | 0        | #N/A     | #N/A      | #N/A     | #N/A     | #N/A     | #N/A     |
| AT3G44215 | AT3G44215 | 1.188904 | 1.784246 | 0        | 0        | 0.662467 | 0.996841 | 0        | 0        | 0        | 0        | 0        | 0        | -0.17478 | NA        | -0.50176 | NA       | -0.48916 | NA       |
| AT3G44220 | AT3G44220 | 11.8904  | 14.27397 | 21.89012 | 9.073143 | 4.637271 | 9.968408 | 7.114428 | 7.55223  | 4.88123  | 16.31211 | 13.30334 | 13.46678 | -0.86947 | 0.069633  | -1.0635  | 0.037148 | -0.12555 | NA       |
| AT3G44230 | AT3G44230 | 0        | 0        | 0        | 0        | 0        | 0        | 0        | 0        | 0        | 0        | 0        | 0        | #N/A     | #N/A      | #N/A     | #N/A     | #N/A     | #N/A     |
| AT3G44235 | AT3G44235 | 0        | 0        | 0        | 0        | 0        | 0        | 0        | 0        | 0        | 0        | 0        | 0        | #N/A     | #N/A      | #N/A     | #N/A     | #N/A     | #N/A     |
| AT3G44240 | CAF1-8    | 0        | 1.784246 | 0        | 0        | 0        | 0        | 0        | 0        | 0        | 0        | 0        | 0        | -0.2184  | NA        | -0.20558 | NA       | -0.19918 | NA       |
| AT3G44245 | AT3G44245 | 1.188904 | 0        | 0        | 0        | 0        | 0        | 0        | 0        | 0        | 0        | 0        | 0        | -0.2184  | NA        | -0.20558 | NA       | -0.19918 | NA       |
| AT3G44250 | CYP71B38  | 0        | 0        | 0        | 0        | 0        | 0        | 0        | 0        | 0        | 0        | 0        | 0        | #N/A     | #N/A      | #N/A     | #N/A     | #N/A     | #N/A     |
| AT3G44260 | CAF1-9    | 54.68958 | 53.52738 | 88.84815 | 427.2625 | 439.8783 | 948.9924 | 931.1007 | 975.3165 | 1863.654 | 68.12703 | 51.88302 | 85.98024 | 2.739907 | 9.85E-12  | 3.6758   | 1.57E-20 | 0.045301 | 0.970665 |
| AT3G44261 | AT3G44261 | 0        | 0        | 0        | 0        | 0        | 0        | 0        | 0        | 0        | 0        | 0        | 0        | #N/A     | #N/A      | #N/A     | #N/A     | #N/A     | #N/A     |
| AT3G44262 | AT3G44262 | 0        | 0        | 0        | 0        | 0        | 0        | 0        | 0        | 0        | 0        | 0        | 0        | #N/A     | #N/A      | #N/A     | #N/A     | #N/A     | #N/A     |
| AT3G44264 | AT3G44264 | 0        | 0        | 0        | 0        | 0        | 0        | 0        | 0        | 0.959536 | 0        | 1.035907 | 0        | 0        | NA        | 0        | NA       | 0.332992 | NA       |
| AT3G44267 | AT3G44267 | 0        | 0        | 0        | 0.662467 | 0        | 0.889303 | 0        | 0        | 0        | 0        | 0        | 1.035907 | 0.099976 | NA        | 0.14456  | NA       | 0.164373 | NA       |
| AT3G44270 | AT3G44270 | 0        | 0        | 0        | 0        | 0        | 0        | 0        | 0        | 0        | 0        | 0        | 0        | #N/A     | #N/A      | #N/A     | #N/A     | #N/A     | #N/A     |
| AT3G44274 | AT3G44274 | 0        | 0        | 0        | 0        | 0        | 0        | 0        | 0        | 0        | 0        | 0        | 0        | #N/A     | #N/A      | #N/A     | #N/A     | #N/A     | #N/A     |
| AT3G44280 | AT3G44280 | 66.57862 | 85.64381 | 65.67037 | 135.6847 | 133.1559 | 108.6556 | 112.9415 | 90.62675 | 176.7005 | 71.96517 | 102.4357 | 121.2011 | 0.764708 | 0.006584  | 0.770136 | 0.008015 | 0.41986  | 0.379363 |
| AT3G44290 | NAC60     | 2.377808 | 1.784246 | 0        | 0        | 2.649869 | 0        | 0.889303 | 0        | 1.952492 | 0        | 1.330334 | 0        | -0.16599 | 0.813621  | -0.13597 | 0.855259 | -0.36733 | NA       |
| AT3G44300 | NIT2      | 345.971  | 417.5136 | 522.7877 | 1349.424 | 1341.496 | 1830.2   | 1362.413 | 1424.135 | 991.8659 | 353.1091 | 252.7635 | 362.5673 | 1.756076 | 1.345E-18 | 1.505576 | 1.64E-13 | -0.39208 | 0.265066 |
| AT3G44310 | NIT1      | 5804.229 | 6767.645 | 6574.763 | 5070.237 | 4973.142 | 5428.795 | 3475.398 | 3529.049 | 4127.568 | 6061.387 | 5157.705 | 6562.468 | -0.30385 | 0.024496  | -0.77321 | 5.79E-10 | -0.10489 | 0.685948 |
| AT3G44320 | NIT3      | 47.55616 | 73.15409 | 39.91728 | 75.05963 | 68.8966  | 99.68408 | 50.6903  | 52.86561 | 62.47974 | 64.28889 | 46.56169 | 47.6517  | 0.587175 | 0.038975  | 0.070916 | 0.85997  | 0.016946 | 0.984172 |
| AT3G44325 | AT3G44325 | 0        | 0        | 0        | 0        | 0.662467 | 0        | 1.07889  | 0        | 0.959536 | 0        | 0        | 0        | 0.09931  | NA        | 0.162455 | NA       | 0.157224 | NA       |
| AT3G44326 | AT3G44326 | 0        | 0        | 10.7228  | 4.637271 | 6.977885 | 2.66791  | 0        | 0.976246 | 0.959536 | 0        | 0        | 0        | 2.145393 | 0.000337  | 0.538686 | 0.463724 | 0.105115 | NA       |
| AT3G44330 | AT3G44330 | 525.4955 | 388.9656 | 458.4049 | 473.4531 | 438.5533 | 543.2782 | 430.4229 | 488.7371 | 430.5245 | 459.6176 | 460.2956 | 521.061  | 0.073367 | 0.704297  | -0.03128 | 0.887872 | 0.063247 | 0.86061  |
| AT3G44340 | CEF       | 898.8114 | 751.1676 | 762.2914 | 925.0481 | 975.8143 | 1107.49  | 1011.138 | 1008.762 | 690.2059 | 628.4958 | 633.239  | 590.4667 | 0.309744 | 0.081631  | 0.1633   | 0.425368 | -0.37555 | 0.134038 |
| AT3G44350 | NAC061    | 1.188904 | 3.568492 | 2.575309 | 43.30364 | 39.08557 | 47.84836 | 24.01119 | 35.60337 | 25.3824  | 2.878607 | 0        | 0        | 3.279076 | 7.45E-13  | 2.676574 | 1.62E-06 |          |          |



|           |           |          |          |          |          |          |          |          |           |          |           |          |           |          |          |          |          |          |          |          |           |          |          |          |          |          |          |          |
|-----------|-----------|----------|----------|----------|----------|----------|----------|----------|-----------|----------|-----------|----------|-----------|----------|----------|----------|----------|----------|----------|----------|-----------|----------|----------|----------|----------|----------|----------|----------|
| AT3G45480 | AT3G45480 | 0        | 1.784246 | 0        | 0        | 0        | 0        | 0        | 0         | 0        | 0         | 0        | 0         | 0        | 0        | 0        | 0        | 0        | 0        | 0        | -0.2184   | NA       | -0.20558 | NA       | -0.19918 | NA       |          |          |
| AT3G45490 | AT3G45490 | 0        | 0        | 0        | 0.412416 | 0.662467 | 0        | 2.66791  | 0         | 0        | 0         | 0        | 0         | 0        | 0        | 0        | 0        | 0        | 0        | 0        | 0.177351  | NA       | 0.414738 | NA       | 0        | NA       |          |          |
| AT3G45500 | AT3G45500 | 0        | 0        | 1.287654 | 0        | 0        | 0        | 0        | 0         | 0        | 0         | 0        | 0         | 0        | 0        | 0        | 0        | 0        | 0        | 0        | 0.2071813 | NA       | -0.20656 | NA       | 0.115737 | NA       |          |          |
| AT3G45510 | AT3G45510 | 0        | 0        | 0        | 0        | 0        | 0        | 0        | 0         | 0        | 0         | 0        | 0         | 0        | 0        | 0        | 0        | 0        | 0        | 0        | 1.330334  | 0        | 0        | NA       | 0.172362 | NA       |          |          |
| AT3G45520 | AT3G45520 | 0        | 1.784246 | 0        | 0        | 0        | 0        | 0.889303 | 0         | 0        | 0         | 0        | 0         | 0        | 0        | 0        | 0        | 0        | 0        | 0        | 0         | 0        | -0.26522 | NA       | -0.08117 | NA       |          |          |
| AT3G45525 | AT3G45525 | 0        | 0        | 0        | 0        | 0        | 0        | 0        | 0         | 0        | 0         | 0        | 0         | 0        | 0        | 0        | 0        | 0        | 0        | 0        | 0         | 0        | NA       | NA       | NA       | NA       |          |          |
| AT3G45530 | AT3G45530 | 1.188904 | 0        | 1.287654 | 0.412416 | 0        | 0.996841 | 1.778607 | 1.07889   | 0        | 0         | 0        | 1.330334  | 1.035907 | 0        | 0        | 0        | 0        | 0        | 0        | 0         | -0.26751 | NA       | 0.049749 | NA       | -0.05923 | NA       |          |
| AT3G45540 | AT3G45540 | 0        | 3.568492 | 0        | 0        | 0        | 0        | 0        | 0         | 0        | 0         | 0        | 0         | 0        | 0        | 0        | 0        | 0        | 0        | 0        | 0         | -0.44877 | NA       | -0.4322  | NA       | -0.42711 | NA       |          |
| AT3G45550 | AT3G45550 | 0        | 0        | 0        | 0        | 0        | 0        | 0        | 0         | 1.07889  | 1.952492  | 0        | 1.330334  | 0        | 0        | 0        | 0        | 0        | 0        | 0        | 0         | 0        | 0        | NA       | 0.486938 | NA       | 0.198816 | NA       |
| AT3G45555 | AT3G45555 | 0        | 3.568492 | 0        | 0        | 0        | 0        | 0        | 0         | 0        | 0         | 0        | 0         | 0        | 0        | 0        | 0        | 0        | 0        | 0        | 0         | -0.44877 | NA       | -0.4322  | NA       | -0.42711 | NA       |          |
| AT3G45560 | AT3G45560 | 0        | 0        | 0        | 0        | 0        | 0        | 0        | 0         | 0        | 0         | 0        | 0         | 0        | 0        | 0        | 0        | 0        | 0        | 0        | 0         | 0        | NA       | NA       | NA       | NA       | NA       |          |
| AT3G45570 | AT3G45570 | 0        | 0        | 0        | 0        | 0        | 0        | 0        | 0         | 0        | 0         | 0        | 0         | 0        | 0        | 0        | 0        | 0        | 0        | 0        | 0         | 0        | NA       | NA       | NA       | NA       | NA       |          |
| AT3G45577 | AT3G45577 | 0        | 0        | 0        | 0        | 0        | 0        | 0        | 0         | 0        | 0         | 0        | 0         | 0        | 0        | 0        | 0        | 0        | 0        | 0        | 0         | 0        | NA       | NA       | NA       | NA       | NA       |          |
| AT3G45580 | AT3G45580 | 0        | 0        | 0        | 0        | 0        | 0        | 1.778607 | 0         | 0        | 0         | 0        | 0         | 0        | 0        | 0        | 0        | 0        | 0        | 0        | 0         | 0        | 0        | 0        | 0.26262  | NA       | 0.150298 | NA       |
| AT3G45590 | SEN1      | 28.53369 | 24.97944 | 36.05432 | 54.02644 | 71.54647 | 73.76622 | 61.36194 | 47.47116  | 54.66978 | 39.34096  | 31.92802 | 31.0772   | 1.058144 | 0.000193 | 0.802264 | 0.009343 | 0.166128 | 0.806773 | 0.062237 | 0.782035  | -0.27799 | 0.159825 | 0.21691  | 0.48264  | 0.134769 | 0.895904 |          |
| AT3G45600 | TET3      | 417.3053 | 553.1163 | 542.1025 | 529.1292 | 589.5959 | 455.5562 | 446.4303 | 375.4537  | 416.857  | 655.3628  | 611.9536 | 492.0556  | 0.062237 | 0.782035 | -0.27799 | 0.159825 | 0.21691  | 0.48264  | 0.134769 | 0.895904  | -0.56509 | 0.238351 | -0.09566 | 0.877535 | -0.57077 | 0.011169 |          |
| AT3G45610 | DOF3.2    | 21.40027 | 14.27397 | 16.73951 | 14.02213 | 13.91181 | 3.987363 | 10.67164 | 16.18335  | 22.45366 | 18.23118  | 21.28534 | 19.68222  | -0.56509 | 0.238351 | -0.09566 | 0.877535 | -0.57077 | 0.011169 | 0.134769 | 0.895904  | 1.091607 | 3.93-12  | 0.64684  | 0.000113 | 0.175748 | 0.481366 |          |
| AT3G45620 | AT3G45620 | 221.1361 | 303.3218 | 292.2975 | 634.7076 | 577.009  | 540.2877 | 393.0721 | 487.6583  | 404.1658 | 195.7453  | 163.6311 | 181.2836  | -0.61937 | 0.001474 | -0.37353 | 0.081185 | -0.31933 | 0.314709 | 0.134769 | 0.895904  | 0.51949  | 0.315561 | 0.998608 | 0.042577 | -0.50435 | NA       |          |
| AT3G45630 | AT3G45630 | 600.3965 | 460.3355 | 444.2407 | 326.2207 | 317.3218 | 326.9638 | 429.5336 | 454.2127  | 272.3726 | 403.9645  | 395.1092 | 401.9317  | 0.923435 | 3.1E-13  | 1.349759 | 1.84E-27 | -0.43924 | 0.011708 | 0.134769 | 0.895904  | 1.191282 | 1482.708 | 1350.749 | 2313.651 | 2555.799 | 2818.069 |          |
| AT3G45638 | AT3G45638 | 11.88904 | 16.05821 | 7.725926 | 17.73387 | 19.87402 | 15.94945 | 21.34328 | 10.402609 | 6.767285 | 1.330334  | 12.43088 | 0         | 0.923435 | 3.1E-13  | 1.349759 | 1.84E-27 | -0.43924 | 0.011708 | 0.134769 | 0.895904  | 11.88904 | 16.05821 | 7.725926 | 17.73387 | 19.87402 | 15.94945 |          |
| AT3G45640 | MPK3      | 1191.282 | 1482.708 | 1350.749 | 2313.651 | 2555.799 | 2818.069 | 3639.03  | 3632.622  | 3086.89  | 932.6686  | 1042.982 | 978.9317  | 0.923435 | 3.1E-13  | 1.349759 | 1.84E-27 | -0.43924 | 0.011708 | 0.134769 | 0.895904  | 1191.282 | 1482.708 | 1350.749 | 2313.651 | 2555.799 | 2818.069 |          |
| AT3G45650 | NPF2.7    | 33.28931 | 37.46917 | 48.93086 | 82.89553 | 79.49607 | 93.70303 | 72.03358 | 88.46897  | 99.57709 | 35.50282  | 33.25835 | 37.29264  | 1.039967 | 3.39E-05 | 0.674481 | 0.333442 | 0.969482 | 0.163001 | 0.328648 | 0.163001  | 0.674481 | 0.333442 | 0.969482 | 0.163001 | 0.328648 | 0.163001 |          |
| AT3G45660 | NPF2.6    | 3.566712 | 0        | 0        | 2.474493 | 3.974804 | 4.984204 | 8.003731 | 3.23667   | 3.904984 | 4.797678  | 0        | 0.2071813 | 0.674481 | 0.333442 | 0.969482 | 0.163001 | 0.328648 | 0.163001 | 0.328648 | 0.163001  | 0.674481 | 0.333442 | 0.969482 | 0.163001 | 0.328648 | 0.163001 |          |
| AT3G45670 | AT3G45670 | 0        | 0        | 2.575309 | 0        | 0        | 0        | 0.889303 | 0         | 0        | 0         | 0        | 0         | 0        | 0        | 0        | 0        | 0        | 0        | 0        | 0         | -0.43226 | NA       | -0.23534 | NA       | -0.21273 | NA       |          |
| AT3G45673 | AT3G45673 | 0        | 0        | 0        | 0        | 0        | 0        | 0        | 0         | 0        | 0         | 0        | 1.330334  | 0        | 0        | 0        | 0        | 0        | 0        | 0        | 0         | 0        | NA       | NA       | 0        | NA       | 0.172362 | NA       |
| AT3G45680 | NPF2.3    | 29.7226  | 10.70548 | 23.17778 | 7.011065 | 6.624673 | 7.974726 | 4.446517 | 3.23667   | 3.904984 | 36.46235  | 33.25835 | 34.18492  | -1.40545 | 0.000761 | -1.98196 | 1.53E-05 | 0.624609 | 0.323771 | 0.134769 | 0.895904  | 0.095918 | NA       | 0        | NA       | 0        | NA       |          |
| AT3G45690 | NPF2.2    | 0        | 0        | 0        | 0.412416 | 0        | 0        | 0        | 0         | 0        | 0         | 0        | 0         | 0.095918 | NA       | -0.42471 | NA       | -0.41895 | NA       | 0        | NA        | 0        | 0        | 0        | 0        | 0        | 0        | 0        |
| AT3G45700 | NPF2.4    | 1.188904 | 0        | 0        | 1.237247 | 1.324935 | 0        | 2.66791  | 2.15778   | 0.976246 | 0         | 0        | 0         | 0.245374 | NA       | 0.663258 | NA       | -0.27887 | NA       | 0        | NA        | 0        | 0        | 0        | 0        | 0        | 0        | 0        |
| AT3G45710 | NPF2.5    | 7.133424 | 12.48972 | 10.30123 | 10.31039 | 9.274542 | 5.981045 | 6.225124 | 1.07889   | 2.928738 | 7.676285  | 7.982004 | 7.251346  | -0.10538 | 0.875944 | -1.06649 | 0.069998 | -0.27799 | 0.159825 | 0.21691  | 0.48264   | 0.095918 | NA       | 0        | NA       | 0        | NA       |          |
| AT3G45720 | NPF2.1    | 0        | 0        | 0        | 0.412416 | 0        | 0        | 0        | 0         | 0        | 0         | 0        | 0         | 0.095918 | NA       | -0.42471 | NA       | -0.41895 | NA       | 0        | NA        | 0        | 0        | 0        | 0        | 0        | 0        | 0        |
| AT3G45730 | AT3G45730 | 20.21137 | 35.68492 | 27.04074 | 111.7646 | 89.43308 | 57.81677 | 85.37313 | 57.18117  | 93.71962 | 20.15025  | 23.94601 | 19.68222  | 1.565662 | 8.41E-07 | 1.421888 | 1.41E-05 | -0.32291 | 0.645681 | 0.134769 | 0.895904  | 0.338987 | 0.107951 | 0.175748 | 0.481366 | -0.03186 | 0.954739 |          |
| AT3G45740 | AT3G45740 | 111.757  | 132.0342 | 124.9025 | 164.5538 | 144.4179 | 157.5008 | 153.8495 | 148.8868  | 113.2445 | 141.05117 | 105.0964 | 110.842   | -0.22806 | 0.474789 | -0.10493 | 0.780235 | -0.03171 | 0.966307 | 0.134769 | 0.895904  | 111.757  | 132.0342 | 124.9025 | 164.5538 | 144.4179 | 157.5008 |          |
| AT3G45750 | AT3G45750 | 115.3237 | 66.0171  | 108.163  | 91.96867 | 73.53387 | 81.74094 | 110.2736 | 99.25787  | 61.5035  | 102.6703  | 73.16837 | 108.7702  | -0.22806 | 0.474789 | -0.10493 | 0.780235 | -0.03171 | 0.966307 | 0.134769 | 0.895904  | 115.3237 | 66.0171  | 108.163  | 91.96867 | 73.53387 | 81.74094 | 110.2736 |
| AT3G45755 | AT3G45755 | 0        | 0        | 0        | 0        | 0        | 0        | 0        | 0         | 1.778607 | 0         | 0        | 0         | 0        | 0        | 0        | 0        | 0        | 0        | 0        | 0         | 0        | 0        | NA       | 0.248756 | NA       | 0        | NA       |
| AT3G45760 | AT3G45760 | 408.983  | 390.7499 | 458.4049 | 393.8569 | 412.0546 | 373.8153 | 383.2898 | 429.3982  | 436.382  | 342.5542  | 332.5835 | 381.2136  | -0.0927  | 0.560839 | -0.01438 | 0.941326 | -0.25045 | 0.241532 | 0.134769 | 0.895904  | 408.983  | 390.7499 | 458.4049 | 393.8569 | 412.0546 | 373.8153 |          |
| AT3G45770 | AT3G45770 | 0        | 0        | 0        | 0        | 0        | 0        | 0.889303 | 0         | 0        | 0         | 0        | 0         | 0        | 0        | 0        | 0        | 0        | 0        | 0        | 0         | 0        | 0        | 0        | 0        | 0        | 0        | 0        |
| AT3G45780 | PHOT1     | 5386.924 | 5295.642 | 4918.84  | 2362.316 | 2402.106 | 2868.908 | 2807.531 | 2918.397  | 2107.715 | 4516.534  | 5355.925 | 4464.757  | -1.01596 | 2.31E-12 | -0.9784  | 1.78E-11 | -0.12025 | 0.694535 | 0.134769 | 0.895904  | 5386.924 | 5295.642 | 4918.84  | 2362.316 | 2402.106 | 2868.908 |          |
| AT3G45790 | AT3G45790 | 1.188904 | 0        | 0        | 1.287654 | 0        | 0        | 0        | 0         | 0        | 0         | 0        | 0         | 0.095918 | NA       | -0.42471 | NA       | -0.41895 | NA       | 0        | NA        | 0        | 0        | 0        | 0        | 0        | 0        | 0        |
| AT3G45800 | AT3G45800 | 16.64466 | 7.136984 | 10.30123 | 4.536571 | 8.612075 | 2.990522 | 3.535821 | 2.15778   | 1.952492 | 13.4335   | 10.64267 | 14.50269  | -0.85716 | 0.118058 | -1.33935 | 0.018494 | 0.138762 | NA       | 0        | NA        | 16.64466 | 7.136984 | 10.30123 | 4.536571 | 8.612075 | 2.990522 |          |
| AT3G45810 | RBOHJ     | 0        | 0        | 0        | 0        | 0        | 0        | 0.889303 | 0         | 0        | 0         | 0        | 0         | 0        | 0        | 0        | 0        | 0        | 0        | 0        | 0         | 0        | 0        | 0        | 0        | 0        | 0        | 0        |
| AT3G45820 | AT3G45820 | 0        | 0        | 2.575309 | 0.412416 | 0        | 0        | 0.889303 | 0         | 0.976246 | 0.959536  | 0        | 0         | -0.38518 | NA       | -0.09673 | NA       | -0.24758 | NA       | 0        | NA        | 0        | 0        | 0        | 0        | 0        | 0        | 0        |
| AT3G45830 | AT3G45830 | 277.0146 | 239.089  | 216.3259 | 109.2901 | 122.5564 | 174.4471 | 184.0858 | 195.2791  | 179.6293 | 172.7164  | 219.5051 | 198.8941  | -0.84936 | 1.46E-05 | -0.38162 | 0.084079 | -0.30669 | 0.361599 | 0.134769 | 0.895904  | 277.0146 | 239.089  | 216.3259 | 109.2901 | 122.5564 | 174.4471 |          |
| AT3G45840 | AT3G45840 | 0        | 0        | 0        | 0        | 0        | 0.996841 | 0        | 0         | 0        | 0         | 0        | 0         | 0.134822 | NA       | 0        | NA       | 0.152581 | NA       | 0        | NA        | 0        | 0        | 0        | 0        | 0        | 0        | 0        |
| AT3G45850 | AT3G45850 | 1040.291 | 920.671  | 916.8099 | 430.5619 | 372.9691 | 465.5246 | 503.3458 | 541.6027  | 296.7788 | 1063.165  | 1174.685 | 936.4595  | -1.14981 | 3.66E-09 | -1.07062 | 5.9E-08  | 0.136769 | 0.745516 | 0.134769 | 0.895904  | 1040.291 | 920.671  | 916.8099 | 430.5619 | 372.9691 | 465.5246 |          |
| AT3G45851 | AT3G45851 | 0        | 0        | 0        | 0        | 0        | 0        | 0.889303 | 0         | 0        | 0         | 0        | 0         | 0        | 0        | 0        | 0        | 0        | 0        | 0        | 0         | 0        | 0        | 0        | 0        | 0        | 0        | 0        |
| AT3G45860 | CRK4      | 565.9183 | 808.2635 | 589.7457 | 1734.207 | 1572     |          |          |           |          |           |          |           |          |          |          |          |          |          |          |           |          |          |          |          |          |          |          |

|           |           |          |          |          |          |          |          |          |          |          |          |          |          |          |          |          |          |          |          |
|-----------|-----------|----------|----------|----------|----------|----------|----------|----------|----------|----------|----------|----------|----------|----------|----------|----------|----------|----------|----------|
| AT3G46370 | AT3G46370 | 430.3832 | 506.7259 | 509.9111 | 44.9533  | 37.09817 | 75.7599  | 142.2886 | 130.5457 | 56.62227 | 511.4325 | 456.3046 | 463.0502 | -3.03329 | 2.28E-30 | -2.01817 | 3.07E-14 | -0.01352 | 0.987026 |
| AT3G46375 | AT3G46375 | 2.377808 | 0        | 1.287654 | 1.237247 | 0        | 0        | 0        | 1.07889  | 2.928738 | 2.878607 | 0        | 2.071813 | -0.39285 | 0.569428 | 0.012297 | 0.988032 | 0.151385 | NA       |
| AT3G46380 | AT3G46380 | 0        | 0        | 0        | 0        | 0        | 0        | 0        | 0        | 0.976246 | 0        | 0        | 0        | 0        | 0        | 0.16673  | NA       | 0        | NA       |
| AT3G46382 | AT3G46382 | 0        | 0        | 0        | 0        | 0        | 0        | 0        | 0        | 0        | 0        | 0        | 0        | #N/A     | #N/A     | #N/A     | #N/A     | #N/A     | #N/A     |
| AT3G46384 | AT3G46384 | 0        | 0        | 0        | 0        | 0        | 0        | 0        | 0.889303 | 0        | 0        | 0        | 1.330334 | 0        | 0        | 0.141773 | NA       | 0.183636 | NA       |
| AT3G46385 | AT3G46385 | 57.06739 | 73.15409 | 56.65679 | 73.82239 | 64.92179 | 69.77885 | 73.81219 | 59.33895 | 55.64602 | 75.80331 | 53.21336 | 74.58527 | 0.17094  | 0.55675  | 0.033275 | 0.927091 | 0.146402 | 0.784341 |
| AT3G46387 | AT3G46387 | 0        | 0        | 0        | 0        | 0        | 0        | 1.778607 | 0        | 0        | 0        | 0        | 0        | 0        | 0        | 0.248756 | NA       | 0        | NA       |
| AT3G46390 | AT3G46390 | 0        | 0        | 1.287654 | 0        | 0        | 0.996841 | 0        | 0        | 0        | 0        | 0        | 0        | 0.15625  | NA       | 0        | NA       | 0        | NA       |
| AT3G46400 | AT3G46400 | 0        | 0        | 0        | 0        | 0        | 0        | 0        | 1.07889  | 0.976246 | 0        | 1.330334 | 0        | 0        | 0        | 0.34973  | NA       | 0.20646  | NA       |
| AT3G46410 | AT3G46410 | 0        | 0        | 0        | 0        | 0        | 0        | 0.889303 | 0        | 0        | 0        | 0        | 0        | 0        | 0        | 0.160764 | NA       | 0        | NA       |
| AT3G46420 | AT3G46420 | 0        | 0        | 0        | 0        | 0        | 0        | 0        | 0.976246 | 0        | 0        | 0        | 0        | 0        | 0        | 0.16673  | NA       | 0        | NA       |
| AT3G46430 | AT3G46430 | 304.0265 | 287.2636 | 327.0642 | 566.659  | 712.1523 | 408.7047 | 449.9876 | 286.9847 | 612.1062 | 355.0282 | 432.3585 | 528.3123 | 0.782476 | 0.003491 | 0.473589 | 0.109221 | 0.438061 | 0.311768 |
| AT3G46440 | UX55      | 202.1137 | 256.9314 | 233.0654 | 579.4439 | 495.5255 | 482.4709 | 494.4527 | 548.0761 | 424.667  | 253.3174 | 263.4061 | 232.0431 | 1.167079 | 2.72E-14 | 1.071088 | 4.89E-12 | 0.116178 | 0.740609 |
| AT3G46450 | AT3G46450 | 290.0926 | 244.4417 | 269.1198 | 225.1789 | 227.2263 | 298.0554 | 253.4515 | 283.7481 | 178.653  | 215.8955 | 263.4061 | 233.079  | -0.10671 | 0.667975 | -0.16691 | 0.504301 | -0.17568 | 0.656462 |
| AT3G46460 | UBC13     | 229.4585 | 190.9143 | 258.8185 | 208.6823 | 280.2237 | 192.3903 | 203.6505 | 143.4924 | 280.1826 | 246.6007 | 347.2172 | 229.9712 | 0.001934 | 0.996071 | -0.11167 | 0.748204 | 0.259005 | 0.589945 |
| AT3G46470 | AT3G46470 | 0        | 0        | 0        | 0        | 0        | 0        | 0        | 0        | 0        | 0        | 0        | 0        | #N/A     | #N/A     | #N/A     | #N/A     | #N/A     | #N/A     |
| AT3G46480 | AT3G46480 | 0        | 0        | 0        | 0.412416 | 0.662467 | 0        | 1.778607 | 1.07889  | 0        | 0        | 0        | 0        | 0.205801 | NA       | 0.500313 | NA       | 0        | NA       |
| AT3G46482 | AT3G46482 | 0        | 0        | 0        | 0        | 0        | 0        | 0        | 0        | 0        | 0        | 0        | 0        | #N/A     | #N/A     | #N/A     | #N/A     | #N/A     | #N/A     |
| AT3G46484 | AT3G46484 | 0        | 0        | 0        | 0        | 0        | 0        | 1.07889  | 0        | 0        | 0        | 0        | 2.071813 | 0        | 0        | 0.150233 | NA       | 0.295662 | NA       |
| AT3G46487 | AT3G46487 | 0        | 0        | 0        | 0.412416 | 0.662467 | 0        | 1.07889  | 0        | 0        | 0        | 2.660668 | 0        | 0.179427 | NA       | 0.159971 | NA       | 0.378239 | NA       |
| AT3G46490 | AT3G46490 | 74.90095 | 73.15409 | 72.10864 | 15.25938 | 10.59948 | 7.974726 | 8.003731 | 10.7889  | 9.76246  | 89.23681 | 70.5077  | 103.5907 | -2.44083 | 2.76E-17 | -2.6819  | 9.62E-17 | 0.257184 | 0.608101 |
| AT3G46500 | AT3G46500 | 0        | 3.568492 | 0        | 1.237247 | 0.662467 | 0.996841 | 1.778607 | 2.15778  | 0.976246 | 0        | 2.660668 | 1.025907 | -0.0354  | 0.966029 | 0.257186 | 0.746131 | 0.053926 | NA       |
| AT3G46510 | PUB13     | 759.7096 | 706.5614 | 598.7593 | 580.6811 | 575.0216 | 646.9497 | 540.6965 | 651.6495 | 477.3843 | 458.658  | 494.8842 | 479.6247 | -0.19483 | 0.246992 | -0.3029  | 0.068636 | -0.51947 | 0.006914 |
| AT3G46520 | ACT11     | 0        | 0        | 1.287654 | 0        | 0.662467 | 0.996841 | 2.66791  | 3.23667  | 1.952492 | 0.959536 | 2.660668 | 1.035907 | -0.11324 | 0.887169 | 0.887414 | 0.186499 | 0.460679 | NA       |
| AT3G46530 | RP113     | 483.8839 | 460.3355 | 356.6803 | 502.7346 | 557.135  | 565.2087 | 764.801  | 862.0331 | 852.2628 | 402.0454 | 391.1182 | 427.8294 | 0.315175 | 0.03543  | 0.918841 | 1.146191 | -0.08799 | 0.780835 |
| AT3G46540 | AT3G46540 | 252.0476 | 344.3595 | 324.4889 | 708.53   | 598.8704 | 587.1392 | 510.4602 | 546.9972 | 612.1062 | 321.4444 | 299.3251 | 376.0341 | 1.030865 | 6.06E-11 | 0.848153 | 1.62E-07 | 0.119975 | 0.734183 |
| AT3G46550 | FLA4      | 268.6923 | 133.8185 | 126.1901 | 82.48311 | 81.48347 | 113.6398 | 64.02985 | 80.91675 | 108.3633 | 110.3466 | 142.3457 | 114.9856 | -0.89106 | 0.002487 | -1.00614 | 0.000797 | -0.50456 | 0.286336 |
| AT3G46560 | TIM9      | 189.0357 | 196.2671 | 199.5864 | 325.3959 | 346.4704 | 220.3018 | 190.3109 | 183.4113 | 381.7122 | 218.7741 | 244.7815 | 235.1508 | 0.584069 | 0.03412  | 0.351134 | 0.257127 | 0.242772 | 0.636505 |
| AT3G46570 | AT3G46570 | 0        | 0        | 0        | 0        | 0        | 0        | 0        | 0        | 0        | 0        | 0        | 0        | #N/A     | #N/A     | #N/A     | #N/A     | #N/A     | #N/A     |
| AT3G46580 | MBD5      | 32.10041 | 51.74313 | 63.09506 | 71.34789 | 77.50867 | 72.76938 | 55.13682 | 45.31338 | 91.76712 | 63.32935 | 65.18636 | 68.36983 | 0.56431  | 0.069557 | 0.371861 | 0.290948 | 0.402057 | 0.445334 |
| AT3G46585 | AT3G46585 | 0        | 0        | 0        | 0        | 0        | 0        | 0.889303 | 0        | 0        | 0        | 0        | 0        | 0        | 0        | 0.160764 | NA       | 0.068718 | NA       |
| AT3G46590 | TRP2      | 749.0095 | 827.8902 | 744.2642 | 754.3081 | 731.3639 | 720.7159 | 937.3259 | 1108.02  | 964.531  | 750.3569 | 698.4253 | 719.955  | -0.06867 | 0.626415 | 0.373433 | 0.001363 | -0.09331 | 0.687818 |
| AT3G46600 | SCL30     | 464.8614 | 447.8458 | 449.3914 | 579.4439 | 549.1854 | 803.4537 | 1164.098 | 1286.037 | 1004.557 | 358.8663 | 348.5475 | 393.6445 | 0.488919 | 1.004911 | 1.316558 | 2.02E-16 | -0.30025 | 0.28843  |
| AT3G46610 | AT3G46610 | 271.0701 | 239.089  | 239.5037 | 134.0351 | 131.1685 | 149.5261 | 216.1007 | 264.328  | 201.1067 | 250.4388 | 216.8444 | 246.5458 | -0.84873 | 0.02E-07 | -0.14076 | 0.489485 | -0.06875 | 0.858201 |
| AT3G46613 | RTFL4     | 0        | 0        | 0        | 0        | 0        | 0        | 0        | 0        | 0        | 0        | 0        | 0        | #N/A     | #N/A     | #N/A     | #N/A     | #N/A     | #N/A     |
| AT3G46614 | AT3G46614 | 1.188904 | 0        | 0        | 0.824831 | 0.662467 | 0.996841 | 2.66791  | 0        | 0.976246 | 0.959536 | 1.330334 | 1.035907 | 0.162427 | 0.829241 | 0.385645 | 0.589242 | 0.304502 | NA       |
| AT3G46616 | AT3G46616 | 0        | 0        | 0        | 0        | 0        | 0        | 0        | 0        | 0        | 0        | 1.330334 | 1.035907 | 0        | 0        | 0        | NA       | 0.375122 | NA       |
| AT3G46620 | AT3G46620 | 109.3792 | 148.0924 | 153.2309 | 416.1273 | 419.3418 | 724.7032 | 789.7015 | 780.0374 | 968.436  | 137.2136 | 159.6401 | 165.745  | 1.848601 | 9.95E-17 | 2.533059 | 6.3E-31  | 0.164267 | 0.748154 |
| AT3G46630 | AT3G46630 | 545.7069 | 624.4861 | 571.7185 | 488.3    | 594.8956 | 495.4299 | 647.4129 | 634.3873 | 896.1938 | 736.9234 | 802.1914 | 619.4721 | -0.13748 | 0.510683 | 0.317694 | 0.101863 | 0.303737 | 0.281585 |
| AT3G46640 | LUX       | 93.92341 | 89.2123  | 86.27284 | 277.9681 | 253.725  | 288.087  | 593.1654 | 702.3574 | 117.9149 | 97.87263 | 115.7391 | 117.0574 | 1.528778 | 9.13E-11 | 3.065947 | 9.74E-42 | 0.271993 | 0.570418 |
| AT3G46650 | AT3G46650 | 9.511232 | 17.84246 | 19.31482 | 11.96005 | 11.26194 | 6.977885 | 14.22886 | 20.49891 | 16.59618 | 19.19071 | 9.312338 | 20.71813 | -0.48502 | 0.323063 | 1.133675 | 0.824654 | 0.110674 | NA       |
| AT3G46658 | AT3G46658 | 2.377808 | 0        | 0        | 1.649662 | 0.662467 | 0        | 0.889303 | 2.15778  | 2.928738 | 0        | 0        | 0        | 0.000592 | 0.999744 | 0.446979 | 0.517371 | -0.45424 | NA       |
| AT3G46660 | UGT76E12  | 0        | 0        | 0        | 0.662467 | 0        | 0        | 0        | 0        | 0        | 0        | 0        | 0        | 0.128567 | 0        | 0        | NA       | 0        | NA       |
| AT3G46666 | AT3G46666 | 0        | 0        | 0        | 0        | 0        | 1.778607 | 0        | 0        | 0.959536 | 0        | 0        | 0        | 0        | 0        | 0.262373 | NA       | 0.143228 | NA       |
| AT3G46668 | AT3G46668 | 16.64466 | 3.568492 | 14.1642  | 16.08421 | 17.22415 | 13.95577 | 14.22886 | 16.18335 | 19.52492 | 12.47396 | 17.29434 | 14.50269 | 0.334601 | 0.505648 | 0.390806 | 0.462782 | 0.227719 | NA       |
| AT3G46670 | UGT76E11  | 161.6909 | 128.4657 | 166.1074 | 65.98649 | 72.8714  | 74.76306 | 148.5137 | 105.7312 | 132.7695 | 186.1499 | 188.9074 | 181.2836 | -1.08376 | 5E-09    | -0.23656 | 0.291396 | 0.696433 | 0.4002   |
| AT3G46680 | UGT76E6   | 0        | 0        | 1.287654 | 4.536571 | 3.312336 | 4.984204 | 2.66791  | 5.39445  | 1.952492 | 1.919071 | 0        | 0        | 1.283055 | 0.044662 | 1.000306 | 0.145574 | 0.053177 | NA       |
| AT3G46690 | UGT76E5   | 3.566712 | 3.568492 | 3.862963 | 42.89122 | 47.03518 | 74.76306 | 40.9796  | 60.41784 | 47.83605 | 0        | 2.660668 | 2.071813 | 3.157878 | 2.79E-13 | 3.029487 | 4.59E-12 | -0.66449 | 0.518203 |
| AT3G46700 | UGT76E3   | 1.188904 | 3.568492 | 1.287654 | 16.08421 | 19.87402 | 23.92418 | 26.6791  | 16.18335 | 20.50117 | 0        | 3.991002 | 3.10772  | 2.34941  | 4.13E-06 | 2.435083 | 2.37E-06 | 0.022506 | NA       |
| AT3G46710 | RPP13L2   | 0        | 1.784246 | 0        | 0        | 0        | 0.996841 | 0        | 0        | 0        | 0        | 0        | 1.035907 | -0.10175 | NA       | -0.25883 | NA       | 0.096867 | NA       |
| AT3G46720 | UGT76E5   | 0        | 0        | 0        | 0        | 0        | 0.996841 | 3.557214 | 0        | 0.976246 | 0        | 0        | 2.071813 | 0.082838 | NA       | 0.617538 | NA       | -0.28854 | NA       |
| AT3G46730 | RPP13L3   | 1.188904 | 7.136984 | 1.287654 | 0.824831 | 1.987402 | 5.981045 | 0.889303 | 1.07889  | 0.976246 | 5.757214 | 1.330334 | 7.251346 | -0.07478 | 0.93131  | -0.66108 | 0.372854 | 0.446311 | NA       |
| AT3G46740 | TC075-3   | 1371.995 | 840.3799 | 767.442  | 492.4242 | 463.0646 | 597.1076 | 540.6965 | 685.0951 | 631.6132 | 826.1602 | 721.041  | 795.5762 | -0.91621 | 8.73E-06 | -0.66391 | 0.002125 | -0.33796 | 0.328323 |
| AT3G46750 | AT3G46750 | 0        | 0        | 0        | 0        | 0.662467 | 0        | 0.889303 | 0        | 0        | 0        | 0        | 0        | 0.097058 | NA       | 0.130384 | NA       | 0        | NA       |
| AT3G46760 | LECRK5    | 0        | 0        | 0        | 0        | 0        | 0        | 0        | 0        | 0        | 0        | 0        | 0        | #N/A     | #N/A     | #N/A     | #N/A     | #N/A     | #N/A     |
| AT3G46770 | REM22     | 8.322328 | 7.136984 | 10.30123 | 5.773818 | 8.612075 | 2.990522 | 0.889303 | 2.15778  | 4.88123  | 15.35257 | 13.30334 | 7.251346 | -0.40837 | 0.516685 | -1.15926 | 0.056084 | 0.387929 | NA       |
| AT3G46780 | PTAC16    | 8820.478 | 9508.247 | 8654.325 | 3427.586 | 3038.075 | 3439.101 | 3789.322 | 4806.455 | 4386.273 | 8890.098 | 9019.664 | 8480.967 | -1.43256 | 4.24E-40 | -1.04603 | 1.03E-21 | -0.03156 | 0.913471 |
| AT3G46790 | CRR2      | 117.7015 | 99.91778 | 83.69753 | 80.00862 | 75.52127 | 111.6462 | 97.82    |          |          |          |          |          |          |          |          |          |          |          |

|           |           |          |          |           |          |          |          |          |          |          |           |          |          |          |          |          |          |          |          |
|-----------|-----------|----------|----------|-----------|----------|----------|----------|----------|----------|----------|-----------|----------|----------|----------|----------|----------|----------|----------|----------|
| AT3G47210 | AT3G47210 | 1.188904 | 1.784246 | 1.287654  | 15.25938 | 17.22415 | 20.93366 | 20.45398 | 11.86779 | 13.66744 | 4.797678  | 0        | 1.035907 | 2.378448 | 7.21E-06 | 2.190768 | 0.000061 | 0.150894 | NA       |
| AT3G47220 | PLC9      | 13.07794 | 10.70548 | 11.58889  | 16.49662 | 14.57428 | 11.96209 | 8.893035 | 14.02557 | 14.64369 | 4.797678  | 3.991002 | 1.035907 | 0.278064 | 0.612686 | 0.065423 | 0.922211 | -1.34329 | NA       |
| AT3G47230 | AT3G47230 | 0        | 0        | 1.287654  | 0.412416 | 0        | 0        | 3.557214 | 2.15778  | 0.976246 | 0         | 1.330334 | 1.035907 | -0.28064 | 0.681488 | 0.779132 | 0.221344 | 0.138224 | NA       |
| AT3G47240 | AT3G47240 | 2.377808 | 0        | 0         | 0.412416 | 0.662467 | 0        | 0        | 1.07889  | 0.976246 | 0         | 0        | 0        | -0.22804 | NA       | -0.0682  | NA       | -0.44018 | NA       |
| AT3G47250 | AT3G47250 | 1279.261 | 1557.647 | 1412.557  | 1759.365 | 1593.234 | 1815.247 | 1919.117 | 1798.51  | 1253.5   | 1183.107  | 1382.217 | 1352.894 | 0.277884 | 0.126585 | 0.223196 | 0.255472 | -0.11424 | 0.745579 |
| AT3G47260 | AT3G47260 | 1.188904 | 0        | 0         | 0        | 0.662467 | 0        | 0.889303 | 1.07889  | 0.976246 | 0         | 1.330334 | 0        | -0.1704  | NA       | 0.285842 | NA       | -0.02719 | NA       |
| AT3G47270 | AT3G47270 | 0        | 0        | 0         | 0.412416 | 1.324935 | 1.993682 | 0        | 0        | 0        | 0         | 0        | 0        | 0.664459 | NA       | 0        | NA       | 0        | NA       |
| AT3G47280 | AT3G47280 | 0        | 0        | 0         | 0        | 0.662467 | 0        | 0        | 0        | 0        | 0         | 0        | 0        | 0.128567 | NA       | 0        | NA       | 0        | NA       |
| AT3G47290 | PLC8      | 252.0476 | 317.5958 | 267.8321  | 230.1279 | 234.5134 | 276.1249 | 186.7537 | 215.778  | 195.2492 | 237.0053  | 223.4961 | 249.6535 | -0.1736  | 0.323297 | -0.47196 | 0.004222 | -0.22344 | 0.414759 |
| AT3G47295 | PSY2      | 61.82301 | 94.56504 | 73.3963   | 62.68717 | 61.60946 | 46.85152 | 52.46891 | 47.47116 | 66.38473 | 153.5257  | 262.0758 | 103.5907 | -0.376   | 0.289396 | -0.42015 | 0.259727 | 1.107582 | 0.003567 |
| AT3G47300 | SELT      | 45.17835 | 68.8492  | 45.0679   | 55.6761  | 53.65985 | 51.83572 | 52.46891 | 39.91893 | 45.88356 | 31.66468  | 35.91902 | 41.43626 | 0.331677 | 0.259754 | 0.118979 | 0.749452 | -0.21328 | 0.711805 |
| AT3G47310 | AT3G47310 | 0        | 0        | 0         | 0        | 0        | 0        | 0.889303 | 0        | 0        | 0         | 0        | 0        | 0        | NA       | 0        | NA       | 0        | NA       |
| AT3G47320 | AT3G47320 | 0        | 0        | 0         | 0        | 0        | 0        | 0        | 0        | 0        | 0         | 0        | 0        | #N/A     | #N/A     | #N/A     | #N/A     | #N/A     | #N/A     |
| AT3G47330 | AT3G47330 | 0        | 1.784246 | 1.287654  | 0        | 0        | 0        | 0        | 0.976246 | 0        | 0         | 0        | 0        | -0.52658 | NA       | -0.28479 | NA       | -0.48113 | NA       |
| AT3G47340 | ASN1      | 594.452  | 488.8834 | 511.1988  | 247.4493 | 239.8132 | 393.7521 | 478.4453 | 532.9716 | 441.6861 | 467.2939  | 494.8842 | 469.2657 | -0.83882 | 7.83E-05 | -0.23138 | 0.37162  | -0.15268 | 0.730657 |
| AT3G47341 | AT3G47341 | 0        | 0        | 0         | 0        | 0        | 0        | 0        | 0        | 0        | 0         | 0        | 0        | #N/A     | #N/A     | #N/A     | #N/A     | #N/A     | #N/A     |
| AT3G47342 | AT3G47342 | 3.566712 | 3.568492 | 5.150617  | 3.71174  | 3.974804 | 1.993682 | 1.778607 | 4.31556  | 7.809968 | 6.716749  | 1.330334 | 6.215439 | -0.20825 | 0.786717 | 0.103958 | 0.902482 | 0.169604 | 0        |
| AT3G47347 | AT3G47347 | 17.83356 | 26.76369 | 15.45185  | 23.09527 | 26.49869 | 20.93366 | 22.23259 | 12.94668 | 15.61994 | 19.19071  | 19.95501 | 11.39497 | 0.250675 | 0.582768 | -0.17331 | 0.746053 | -0.19855 | 0.826161 |
| AT3G47348 | AT3G47348 | 35.66712 | 8.92123  | 29.61605  | 48.25262 | 44.38531 | 50.83888 | 40.01866 | 35.60337 | 35.14486 | 27.82653  | 38.57969 | 39.36445 | 0.815824 | 0.104033 | 0.467618 | 0.227316 | 0.395514 | 0.521643 |
| AT3G47350 | HS2       | 192.6024 | 190.9143 | 187.9975  | 133.6226 | 123.2189 | 161.4882 | 133.3955 | 159.6757 | 149.3656 | 150.6471  | 99.77505 | 166.781  | -0.44641 | 0.032429 | -0.36103 | 0.111108 | -0.43021 | 0.16697  |
| AT3G47360 | HS3       | 170.0133 | 139.1712 | 194.43518 | 171.1525 | 172.904  | 179.4313 | 232.9975 | 195.2791 | 155.2331 | 268.67    | 272.7185 | 160.5655 | 0.04551  | 0.885187 | 0.199152 | 0.49121  | 0.45298  | 0.208946 |
| AT3G47370 | RS2D08    | 581.374  | 608.4279 | 657.9914  | 661.1022 | 692.2783 | 553.2466 | 513.1281 | 453.1338 | 272.3033 | 611.2242  | 505.5269 | 709.596  | 0.045834 | 0.806565 | -0.12208 | 0.662304 | -0.01477 | 0.979709 |
| AT3G47380 | AT3G47380 | 21.40027 | 26.76369 | 25.75309  | 72.99756 | 78.83361 | 41.86731 | 29.34701 | 33.44559 | 50.76479 | 21.10978  | 33.25835 | 21.75404 | 1.30508  | 0.00012  | 0.563065 | 0.164464 | 0.022575 | 0.983803 |
| AT3G47390 | PYRR      | 179.5245 | 214.1095 | 226.6272  | 193.0105 | 158.9921 | 167.4693 | 184.9751 | 175.8591 | 140.5794 | 222.6123  | 183.5861 | 240.3303 | -0.24102 | 0.24123  | -0.29583 | 0.166621 | 0.066669 | 0.879636 |
| AT3G47400 | PME33     | 11.88904 | 8.82123  | 5.150617  | 4.536571 | 1.987402 | 4.984204 | 2.66791  | 5.39445  | 3.904984 | 5.95356   | 10.64267 | 6.215439 | -0.88513 | 0.127493 | -0.82639 | 0.189349 | 0.021924 | NA       |
| AT3G47410 | AT3G47410 | 0        | 0        | 0         | 0        | 0        | 0        | 0        | 0        | 0        | 0         | 0        | 0        | #N/A     | #N/A     | #N/A     | #N/A     | #N/A     | #N/A     |
| AT3G47420 | ATP53     | 275.8257 | 314.0273 | 257.5309  | 296.9392 | 225.2389 | 327.9606 | 129.8383 | 130.5457 | 107.3871 | 258.1151  | 194.2288 | 229.9712 | 0.006654 | 0.979881 | -1.16741 | 7.52E-10 | -0.29585 | 0.354747 |
| AT3G47430 | PEX11B    | 102.2457 | 119.5445 | 99.14938  | 81.24587 | 100.695  | 52.83256 | 119.1667 | 122.9935 | 157.1756 | 123.7801  | 117.0694 | 101.5188 | -0.40929 | 0.113301 | 0.310601 | 0.263896 | 0.096357 | 0.865107 |
| AT3G47440 | TIP5-1    | 0        | 0        | 0         | 0        | 0        | 0        | 0        | 0        | 0        | 0         | 0        | 0        | #N/A     | #N/A     | #N/A     | #N/A     | #N/A     | #N/A     |
| AT3G47450 | NOA1      | 347.16   | 367.5547 | 431.3642  | 265.5956 | 214.6394 | 247.2165 | 345.0498 | 374.3748 | 295.8025 | 369.4212  | 305.9768 | 400.8958 | -0.64168 | 0.000122 | -0.17277 | 0.400128 | -0.08594 | 0.820327 |
| AT3G47460 | SMC-2     | 103.4346 | 71.36984 | 90.1358   | 85.78244 | 60.94699 | 61.80413 | 92.48756 | 83.07453 | 57.59851 | 103.6298  | 103.766  | 90.12387 | -0.32674 | 0.237553 | -0.18789 | 0.555523 | 0.146601 | 0.784773 |
| AT3G47470 | LHC4A     | 61930.01 | 77545.12 | 71878.15  | 41967    | 37919.63 | 35619.11 | 28491.5  | 28476.22 | 31489.79 | 68751.69  | 73260.16 | 66931.99 | -0.86324 | 2.49E-14 | -1.24451 | 4.97E-29 | -0.01634 | 0.960714 |
| AT3G47480 | CM147     | 52.31177 | 107.0548 | 63.09506  | 77.74034 | 75.45647 | 526.3319 | 614.5087 | 479.0271 | 718.5171 | 49.89585  | 50.52669 | 31.0772  | 3.06287  | 1.85E-36 | 2.909738 | 7.46E-33 | -0.67987 | 0.105535 |
| AT3G47490 | AT3G47490 | 154.5575 | 160.5821 | 198.2988  | 275.4936 | 249.7502 | 218.3081 | 218.7754 | 266.5152 | 158.3234 | 148.9974  | 202.0018 | 0.052471 | 0.007433 | 0.406146 | 0.055859 | -0.01036 | 0.98659  | 0        |
| AT3G47500 | CFD3      | 1237.649 | 1268.599 | 1269.627  | 617.3861 | 556.4725 | 634.9876 | 424.1978 | 431.556  | 363.1635 | 1208.055  | 1245.193 | 993.4344 | -1.05029 | 1.13E-17 | -1.61136 | 1.74E-38 | -0.13065 | 0.594816 |
| AT3G47510 | AT3G47510 | 35.66712 | 28.54794 | 43.78025  | 34.23049 | 32.4609  | 30.20626 | 33.79353 | 15.10446 | 37.09735 | 33.98375  | 61.19536 | 47.6517  | -0.14254 | 0.742184 | -0.30214 | 0.482895 | 0.342497 | 0.591286 |
| AT3G47520 | MDH       | 1114.003 | 933.1607 | 924.5358  | 678.836  | 720.7644 | 701.7759 | 628.7376 | 717.4618 | 786.8543 | 992.1598  | 1199.961 | 903.3105 | -0.49441 | 0.000939 | -0.47313 | 0.002087 | 0.054873 | 0.87702  |
| AT3G47530 | PCMP-H76  | 55.87849 | 35.68492 | 47.64321  | 56.50093 | 49.68505 | 55.82308 | 42.68657 | 57.18117 | 52.71278 | 37.42189  | 39.91002 | 34.18492 | 0.188125 | 0.550812 | 0.09734  | 0.795866 | -0.32973 | 0.521295 |
| AT3G47540 | AT3G47540 | 71.33424 | 74.93833 | 74.63985  | 214.8865 | 214.8865 | 198.3713 | 224.9938 | 174.7802 | 219.6553 | 44.43914  | 95.78405 | 89.08796 | 1.510624 | 1.46E-16 | 1.516768 | 6.95E-16 | 0.269235 | 0.473181 |
| AT3G47543 | AT3G47543 | 0        | 0        | 0         | 0        | 0        | 0        | 0        | 0        | 0        | 0         | 0        | 0        | #N/A     | #N/A     | #N/A     | #N/A     | #N/A     | #N/A     |
| AT3G47550 | AT3G47550 | 217.5694 | 272.9896 | 284.5716  | 381.072  | 313.347  | 364.8437 | 384.1791 | 399.1893 | 332.8999 | 222.6123  | 183.5861 | 197.8581 | 0.448007 | 0.007673 | 0.52078  | 0.002204 | -0.34385 | 0.196048 |
| AT3G47560 | AT3G47560 | 305.5483 | 372.9074 | 341.2284  | 334.8814 | 289.4982 | 304.0364 | 338.8246 | 285.9058 | 372.926  | 432.7506  | 379.1452 | 428.8653 | -0.1249  | 0.493952 | -0.02418 | 0.913644 | 0.286361 | 0.238435 |
| AT3G47570 | AT3G47570 | 115.3237 | 99.91778 | 113.3136  | 166.2035 | 139.7806 | 197.3745 | 157.067  | 215.778  | 154.2469 | 108.4275  | 105.0964 | 105.6625 | 0.583905 | 0.005719 | 0.652655 | 0.002454 | -0.04674 | 0.933855 |
| AT3G47580 | AT3G47580 | 74.90095 | 87.42806 | 69.53333  | 30.93117 | 28.48609 | 34.88943 | 56.91542 | 51.78672 | 30.26363 | 85.39867  | 83.81104 | 82.87252 | -1.23793 | 1.05E-06 | -0.69286 | 0.011565 | 0.127711 | 0.819853 |
| AT3G47590 | AT3G47590 | 97.49512 | 73.15409 | 137.779   | 108.8777 | 119.2441 | 104.6683 | 91.58626 | 102.4945 | 154.2469 | 100.7512  | 90.46271 | 133.6319 | 0.093553 | 0.785796 | 0.15441  | 0.657422 | 0.062907 | 0.927039 |
| AT3G47600 | MYB9A     | 79.65066 | 94.56504 | 75.97161  | 84.95761 | 96.05775 | 81.74094 | 92.48756 | 92.74337 | 103.6298 | 133.0334  | 89.08796 | 0.080482 | 0.776105 | 0.213746 | 0.428644 | 0.368492 | 0.30524  | 0        |
| AT3G47610 | AT3G47610 | 242.5364 | 303.3218 | 224.0519  | 244.9479 | 238.4882 | 269.147  | 234.7761 | 283.7481 | 251.8715 | 251.3983  | 238.1298 | 234.1149 | -0.02583 | 0.905144 | 0.009064 | 0.968599 | -0.07655 | 0.836577 |
| AT3G47620 | TCP14     | 542.1402 | 453.1985 | 404.3235  | 281.6798 | 284.8609 | 327.9606 | 337.064  | 373.2959 | 355.3535 | 388.6119  | 439.0102 | 400.8958 | -0.64438 | 9.19E-06 | -0.3906  | 0.013087 | -0.18971 | 0.475332 |
| AT3G47630 | AT3G47630 | 61.82301 | 78.50683 | 99.14938  | 102.2791 | 105.3323 | 95.69671 | 114.7201 | 98.17898 | 103.4821 | 89.23681  | 83.81104 | 71.47755 | 0.336445 | 0.15344  | 0.393909 | 0.109088 | 0.031217 | 0.960146 |
| AT3G47640 | BHLH47    | 59.4452  | 73.15409 | 59.2321   | 61.44992 | 64.25933 | 61.80413 | 60.04478 | 71.20674 | 59.57709 | 46.05771  | 67.84703 | 49.72351 | -0.02025 | 0.952704 | 0.476004 | 0.073334 | -0.22353 | 0.653105 |
| AT3G47650 | AT3G47650 | 1435.007 | 1232.914 | 1397.105  | 1162.6   | 1382.569 | 1046.683 | 1474.465 | 1257.986 | 2246.342 | 1911.3394 | 2256.246 | 1901.924 | -0.17377 | 0.472    | 0.283788 | 0.228533 | 0.561157 | 0.041675 |
| AT3G47660 | AT3G47660 | 3.566712 | 1.784246 | 0         | 1.237247 | 3.312336 | 2.990522 | 5.335821 | 3.23667  | 0        | 1.919071  | 3.991002 | 4.143626 | 0.166547 | 0.838905 | 0.307337 | 0.707403 | 0.414979 | 0        |
| AT3G47670 | AT3G47670 | 185.465  | 144.5239 | 121.0395  | 133.6226 |          |          |          |          |          |           |          |          |          |          |          |          |          |          |



|           |           |          |           |          |          |          |          |          |          |          |          |          |          |          |          |          |           |          |          |
|-----------|-----------|----------|-----------|----------|----------|----------|----------|----------|----------|----------|----------|----------|----------|----------|----------|----------|-----------|----------|----------|
| AT3G48140 | T24C20_20 | 1947.425 | 2292.756  | 2463.283 | 4637.613 | 5269.265 | 3163.973 | 2878.675 | 2069.311 | 3748.785 | 2521.66  | 2908.11  | 2195.086 | 0.929207 | 0.000004 | 0.362141 | 0.166505  | 0.178879 | 0.698852 |
| AT3G48150 | APC8      | 71.33424 | 58.88012  | 59.2321  | 44.54088 | 56.97219 | 60.80729 | 41.79726 | 61.49673 | 31.23987 | 53.734   | 41.24035 | 70.44164 | -0.22964 | 0.502377 | -0.47611 | 0.157505  | -0.17912 | 0.776437 |
| AT3G48160 | EZF2      | 20.1137  | 116.08821 | 37.34198 | 28.86909 | 29.14856 | 32.89575 | 28.45771 | 21.5778  | 9.76246  | 28.78607 | 27.93701 | 37.29264 | 0.248647 | 0.584548 | -0.28112 | 0.1571439 | 0.300054 | 0.695407 |
| AT3G48170 | ALDH10A9  | 517.1732 | 520.9998  | 534.3766 | 555.9362 | 542.5607 | 633.9907 | 591.3868 | 640.8606 | 642.3699 | 483.606  | 427.0372 | 538.6714 | 0.13442  | 0.370578 | 0.249948 | 0.084372  | -0.1134  | 0.665046 |
| AT3G48180 | AT3G48180 | 3.566712 | 0         | 1.287654 | 12.78488 | 11.26194 | 15.94945 | 4.446517 | 6.47334  | 11.71495 | 1.919071 | 0        | 0        | 1.948029 | 0.000646 | 1.244942 | 0.0494    | -0.47252 | NA       |
| AT3G48185 | AT3G48185 | 26.15589 | 21.41095  | 20.60247 | 33.81808 | 28.48609 | 25.91786 | 29.34761 | 24.81447 | 45.88356 | 16.31211 | 33.25835 | 24.86176 | 0.343794 | 0.407297 | 0.496141 | 0.236668  | 0.080183 | 0.933623 |
| AT3G48190 | ATM       | 507.662  | 454.9827  | 415.9124 | 216.9306 | 194.7654 | 279.1154 | 305.0311 | 422.9249 | 169.8668 | 427.9529 | 409.7429 | 446.4757 | -0.9559  | 0.001665 | -0.59249 | 0.031003  | -0.0976  | 0.870479 |
| AT3G48195 | AT3G48195 | 229.4585 | 181.9931  | 211.1753 | 151.3565 | 166.9418 | 182.4219 | 221.4366 | 214.6991 | 135.6982 | 170.7973 | 222.1658 | 182.3195 | -0.31647 | 0.016719 | -0.12428 | 0.653103  | -0.12084 | 0.791991 |
| AT3G48200 | AT3G48200 | 1429.063 | 1463.082  | 1310.832 | 718.8403 | 580.9838 | 802.4568 | 1295.715 | 1439.239 | 819.0704 | 1450.818 | 1536.536 | 1292.811 | -0.97307 | 5.35E-07 | -0.23535 | 0.321436  | 0.025612 | 0.962787 |
| AT3G48201 | MIR861A   | 0        | 0         | 0        | 0.412416 | 0        | 0        | 0        | 0        | 0        | 0        | 0        | 0        | 0.095918 | NA       | 0        | NA        | 0        | NA       |
| AT3G48205 | AT3G48205 | 0        | 0         | 0        | 0        | 0        | 0        | 0        | 0        | 0        | 0        | 0        | 0        | #N/A     | #N/A     | #N/A     | #N/A      | #N/A     | #N/A     |
| AT3G48208 | AT3G48208 | 0        | 0         | 0        | 0        | 0        | 0        | 0        | 0        | 0        | 0        | 0        | 0        | #N/A     | #N/A     | #N/A     | #N/A      | #N/A     | #N/A     |
| AT3G48209 | AT3G48209 | 0        | 0         | 0        | 0        | 0        | 0        | 0        | 0        | 0        | 0        | 0        | 0        | #N/A     | #N/A     | #N/A     | #N/A      | #N/A     | #N/A     |
| AT3G48210 | AT3G48210 | 60.6341  | 66.0171   | 59.2321  | 106.4032 | 107.9822 | 107.6588 | 66.69776 | 78.75897 | 50.76479 | 76.76285 | 71.83803 | 89.08796 | 0.772697 | 0.000535 | 0.074861 | 0.821752  | 0.350317 | 0.378732 |
| AT3G48220 | AT3G48220 | 0        | 0         | 0        | 0        | 0        | 0        | 0        | 0        | 0        | 0        | 0        | 0        | #N/A     | #N/A     | #N/A     | #N/A      | #N/A     | #N/A     |
| AT3G48230 | AT3G48230 | 0        | 0         | 0        | 0.412416 | 0.662467 | 0        | 0.889303 | 0        | 0        | 0        | 0        | 0        | 0.208167 | NA       | 0.156588 | NA        | 0        | NA       |
| AT3G48231 | LCR48     | 0        | 0         | 0        | 0        | 0        | 0        | 0        | 0        | 0        | 0        | 0        | 0        | #N/A     | #N/A     | #N/A     | #N/A      | #N/A     | #N/A     |
| AT3G48235 | AT3G48235 | 4.755616 | 8.92123   | 1.287654 | 2.062078 | 1.324935 | 2.990522 | 2.66791  | 1.07889  | 2.928738 | 0        | 0        | 3.10772  | -0.67838 | 0.333222 | -0.60936 | 0.416949  | -1.03677 | NA       |
| AT3G48237 | AT3G48237 | 0        | 0         | 0        | 0        | 0        | 0        | 0        | 0        | 0        | 0        | 0        | 0        | #N/A     | #N/A     | #N/A     | #N/A      | #N/A     | #N/A     |
| AT3G48240 | AT3G48240 | 7.133424 | 16.05821  | 7.725926 | 9.073143 | 3.974804 | 5.981045 | 3.557214 | 1.07889  | 6.833722 | 16.31211 | 5.321336 | 10.35907 | -0.46095 | 0.463217 | -0.95934 | 0.120962  | 0.11164  | NA       |
| AT3G48250 | AT3G48250 | 55.87849 | 35.68492  | 52.79383 | 41.24156 | 45.71024 | 41.86731 | 41.79726 | 43.1556  | 39.04984 | 55.65307 | 27.93701 | 44.54398 | -0.17673 | 0.611091 | -0.22794 | 0.534841  | -0.16013 | 0.803737 |
| AT3G48260 | WNK3      | 14.26685 | 28.54794  | 14.1642  | 7.42348  | 9.274542 | 6.977885 | 7.114428 | 7.55223  | 3.904984 | 24.94793 | 31.92802 | 22.78994 | -1.04294 | 0.182856 | -1.29231 | 0.006367  | 0.482087 | NA       |
| AT3G48270 | CYP71A26  | 0        | 3.568492  | 0        | 0.824831 | 0        | 2.990522 | 0        | 1.07889  | 1.952492 | 2.878607 | 0        | 2.071813 | 0.039905 | 0.960628 | -0.02518 | 0.975681  | 0.233159 | NA       |
| AT3G48275 | AT3G48275 | 0        | 0         | 0        | 0        | 0        | 0        | 0        | 0        | 0        | 0        | 0        | 0        | #N/A     | #N/A     | #N/A     | #N/A      | #N/A     | #N/A     |
| AT3G48280 | CYP71A25  | 20.21137 | 21.41095  | 25.75309 | 4.124156 | 4.637271 | 6.977885 | 12.45025 | 19.42002 | 19.52492 | 68.12703 | 53.21336 | 53.86714 | -1.86304 | 1.99E-06 | -0.36274 | 0.424089  | 1.308842 | 0.001326 |
| AT3G48290 | CYP71A24  | 35.66712 | 35.68492  | 43.78025 | 6.186234 | 3.312336 | 9.968408 | 11.56095 | 2.15778  | 3.904984 | 48.93632 | 34.58868 | 38.32854 | -2.29211 | 4.59E-09 | -2.2596  | 5.48E-08  | 0.090098 | 0.922598 |
| AT3G48298 | AT3G48298 | 0        | 0         | 0        | 0        | 0        | 0        | 0        | 0        | 0        | 0        | 0        | 0        | #N/A     | #N/A     | #N/A     | #N/A      | #N/A     | #N/A     |
| AT3G48300 | CYP71A23  | 1.188904 | 1.784246  | 0        | 0.412416 | 1.987402 | 0.996841 | 2.66791  | 2.15778  | 0        | 0.99536  | 1.330334 | 0        | 0.061364 | 0.940708 | 0.280806 | 0.716648  | -0.10123 | NA       |
| AT3G48310 | CYP71A22  | 155.7464 | 190.9143  | 182.8649 | 195.485  | 169.5916 | 225.286  | 234.7761 | 253.5391 | 206.9642 | 204.3811 | 210.1928 | 185.4273 | 0.152935 | 0.457178 | 0.390402 | 0.03924   | 0.181122 | 0.590987 |
| AT3G48320 | CYP71A21  | 174.7689 | 185.5616  | 155.8062 | 166.4205 | 241.1381 | 278.1186 | 225.8831 | 268.6436 | 225.5128 | 163.1211 | 220.8354 | 149.1705 | 0.595573 | 0.01032  | 0.471521 | 0.015149  | 0.039639 | 0.935197 |
| AT3G48330 | PIMT1     | 197.3581 | 171.2876  | 218.9012 | 221.4672 | 239.1507 | 199.3682 | 206.3184 | 200.6735 | 207.9404 | 277.3058 | 270.0578 | 207.1813 | 0.161163 | 0.420801 | 0.057277 | 0.815165  | 0.345086 | 1.199094 |
| AT3G48340 | CEP2      | 1.188904 | 0         | 0        | 5.361402 | 0        | 6.977885 | 2.66791  | 3.23667  | 8.57476  | 0.995936 | 2.660668 | 1.035907 | 1.635879 | 0.007875 | 1.14382  | 0.089295  | 0.374286 | NA       |
| AT3G48344 | AT3G48344 | 0        | 0         | 0        | 0        | 0        | 0        | 0        | 0        | 0        | 0        | 0        | 0        | 0        | NA       | 0        | NA        | 0        | 1.72362  |
| AT3G48346 | AT3G48346 | 0        | 0         | 0        | 0        | 0        | 0        | 0        | 0        | 0        | 0        | 0        | 0        | #N/A     | #N/A     | #N/A     | #N/A      | #N/A     | #N/A     |
| AT3G48350 | CEP3      | 38.04493 | 57.09587  | 63.09506 | 70.11065 | 86.12075 | 92.70619 | 116.4988 | 110.0468 | 137.6507 | 90.19635 | 99.77505 | 99.44703 | 0.617605 | 0.012383 | 1.166972 | 6.02E-07  | 0.84156  | 0.006028 |
| AT3G48360 | BTZ       | 59.4452  | 62.44861  | 65.67037 | 223.5292 | 212.652  | 436.6163 | 1686.119 | 2184.752 | 2316.632 | 49.89585 | 57.20436 | 81.83662 | 2.067814 | 1.11E-14 | 4.781471 | 6.13E-77  | 0.002593 | 0.997279 |
| AT3G48370 | AT3G48370 | 0        | 0         | 0        | 0        | 0        | 0        | 1.07889  | 0        | 0        | 0        | 0        | 0        | 0.16673  | NA       | 0        | NA        | 0        | NA       |
| AT3G48380 | AT3G48380 | 259.1811 | 283.6951  | 292.2975 | 267.6577 | 280.2237 | 286.0933 | 329.9316 | 371.1381 | 259.6814 | 267.7104 | 211.5231 | 248.6176 | -0.0026  | 0.991396 | 0.198752 | 0.32049   | -0.18814 | 0.554635 |
| AT3G48390 | AT3G48390 | 53.50068 | 30.33218  | 36.05432 | 27.21943 | 28.48609 | 24.92102 | 32.90423 | 52.86561 | 44.90732 | 45.09817 | 57.20436 | 31.0772  | -0.54774 | 0.113246 | 0.08834  | 0.845291  | 0.110175 | 0.884847 |
| AT3G48400 | AT3G48400 | 0        | 1.784246  | 0        | 0.824831 | 0.662467 | 0        | 1.07889  | 0        | 0        | 0        | 0        | 0        | 0.030075 | NA       | -0.08685 | NA        | -0.07669 | NA       |
| AT3G48410 | AT3G48410 | 42.80054 | 41.03766  | 37.34198 | 47.42779 | 40.105   | 43.86099 | 56.91542 | 35.60337 | 50.76479 | 44.13864 | 43.90102 | 36.25673 | 0.119007 | 0.739321 | 0.237319 | 0.501604  | 0.031566 | 0.970025 |
| AT3G48420 | AT3G48420 | 1269.749 | 1270.383  | 1375.215 | 643.7807 | 626.694  | 686.8233 | 1178.327 | 1259.065 | 1347.219 | 1807.765 | 1867.789 | 1680.24  | -0.9952  | 5.12E-23 | -0.04944 | 0.732116  | 0.447715 | 0.000312 |
| AT3G48425 | AP11      | 46.36725 | 49.95889  | 51.50617 | 49.07745 | 45.71024 | 51.83572 | 38.24005 | 44.23449 | 37.09735 | 66.20796 | 53.21336 | 60.08258 | -0.01328 | 0.969723 | -0.29301 | 0.356479  | 0.279572 | 0.55687  |
| AT3G48430 | REF6      | 344.7821 | 249.7944  | 256.2432 | 153.0062 | 147.7302 | 168.4661 | 202.7612 | 239.5136 | 216.7266 | 240.8434 | 198.2198 | 242.4021 | -0.85266 | 5.16E-07 | -0.36961 | 0.052647  | -0.31593 | 0.261714 |
| AT3G48440 | AT3G48440 | 54.68958 | 51.74313  | 47.64321 | 72.12723 | 53.65985 | 71.77254 | 82.70522 | 64.7334  | 50.76479 | 47.01725 | 46.56169 | 43.50807 | 0.342062 | 0.243177 | 0.349321 | 0.264937  | -0.16124 | 0.788912 |
| AT3G48450 | AT3G48450 | 0        | 0         | 0        | 3.299325 | 3.974804 | 2.990522 | 2.66791  | 5.39445  | 8.786214 | 1.919071 | 5.321336 | 1.035907 | 1.210751 | 0.050975 | 1.673731 | 0.008119  | 0.952529 | NA       |
| AT3G48460 | AT3G48460 | 161.6909 | 151.6609  | 162.2444 | 83.30795 | 90.09555 | 57.81677 | 81.81592 | 56.10228 | 66.34473 | 212.0574 | 199.5501 | 182.1395 | -0.99161 | 6.7E-07  | -1.17451 | 1.61E-08  | 0.311958 | 0.347226 |
| AT3G48470 | EMB24Z3   | 66.57862 | 73.15409  | 64.38272 | 81.65828 | 59.62205 | 92.70619 | 77.3634  | 76.60119 | 56.2227  | 68.12703 | 75.82904 | 74.58527 | 0.186909 | 0.517794 | 0.048575 | 0.891554  | 0.097019 | 0.869081 |
| AT3G48480 | AT3G48480 | 7.133424 | 3.568492  | 12.87654 | 11.54764 | 17.22415 | 11.96209 | 8.893035 | 15.10446 | 10.73871 | 20.15025 | 25.27635 | 12.43088 | 0.58273  | 0.26309  | 0.378093 | 0.528492  | 1.008308 | NA       |
| AT3G48490 | AT3G48490 | 28.53369 | 33.90067  | 41.20494 | 44.54088 | 37.09817 | 21.9305  | 38.24005 | 17.26224 | 30.26363 | 44.13864 | 69.17737 | 63.13903 | 0.030077 | 0.951099 | -0.23603 | 0.60781   | 0.70147  | 0.184358 |
| AT3G48500 | PDE3I2    | 844.1218 | 603.0752  | 619.3617 | 539.852  | 562.4347 | 536.3005 | 626.0697 | 596.6261 | 700.9446 | 601.6288 | 576.0346 | 668.1597 | -0.33326 | 0.038159 | -0.10353 | 0.59442   | -0.16336 | 0.570781 |
| AT3G48510 | AT3G48510 | 2.377808 | 1.784246  | 1.287654 | 1.237247 | 0.662467 | 1.993682 | 0        | 1.07889  | 0        | 1.919071 | 5.321336 | 1.035907 | -0.2326  | 0.769527 | -0.69966 | 0.323526  | 0.291531 | NA       |
| AT3G48515 | AT3G48515 | 0        | 0         | 0        | 0        | 0        | 0        | 0        | 0        | 0        | 0        | 0        | 0        | #N/A     | #N/A     | #N/A     | #N/A      | #N/A     | #N/A     |
| AT3G48520 | CYP9A83   | 0        | 0         | 0        | 21.85803 | 21.19895 | 57.81677 | 34.68284 | 17.26224 | 24.40615 | 1.919071 | 2.660668 | 0        | 3.491644 | 5.61E-11 | 3.157181 | 5.68E-09  | 0.390915 | NA       |
| AT3G48523 | AT3G48523 | 2.377808 | 1.784246  | 6.438272 | 0.824831 | 0        | 0.996841 | 0.889303 | 2.15778  | 1.952492 | 2.878607 | 3.991002 | 2.071813 | -1.19201 | 0.068661 | -0.6029  |           |          |          |

|           |           |          |          |          |          |          |          |          |          |          |          |          |           |          |          |          |          |          |          |
|-----------|-----------|----------|----------|----------|----------|----------|----------|----------|----------|----------|----------|----------|-----------|----------|----------|----------|----------|----------|----------|
| AT3G49010 | RPL13B    | 1802.378 | 1771.756 | 1968.823 | 2103.732 | 2077.497 | 1901.972 | 1423.775 | 1484.553 | 2234.627 | 1673.43  | 1549.839 | 2184.727  | 0.131099 | 0.567206 | -0.10567 | 0.67116  | -0.03449 | 0.945973 |
| AT3G49020 | AT3G49020 | 0        | 0        | 0        | 0        | 0        | 0        | 0.889303 | 0        | 0        | 0.959536 | 0        | 0         | 0        | NA       | 0.13694  | NA       | 0.147196 | NA       |
| AT3G49030 | AT3G49030 | 1.188904 | 1.784246 | 0        | 0        | 0        | 0        | 0        | 1.07889  | 0        | 0.959536 | 0        | 0         | -0.53699 | NA       | -0.27562 | NA       | -0.27413 | NA       |
| AT3G49040 | AT3G49040 | 1.188904 | 0        | 0        | 0        | 0.662467 | 0        | 0        | 0        | 0        | 0        | 1.330334 | 0         | -0.09648 | NA       | -0.21752 | NA       | -0.0033  | NA       |
| AT3G49050 | AT3G49050 | 237.7808 | 285.4794 | 257.5309 | 253.6356 | 247.1003 | 246.2197 | 241.8905 | 256.7758 | 198.1779 | 266.7509 | 304.6465 | 256.9048  | -0.05529 | 0.785149 | -0.15601 | 0.420127 | 0.086413 | 0.802435 |
| AT3G49051 | AT3G49051 | 0        | 0        | 0        | 0        | 0        | 0        | 0        | 0        | 0        | 0        | 0        | 0         | #N/A     | #N/A     | #N/A     | #N/A     | #N/A     | #N/A     |
| AT3G49055 | AT3G49055 | 4.755616 | 3.568492 | 3.862963 | 5.773818 | 5.962205 | 2.990522 | 2.66791  | 4.31556  | 6.833722 | 7.676285 | 3.991002 | 6.215439  | 0.202593 | 0.783282 | 0.093093 | 0.910438 | 0.386246 | 0.910438 |
| AT3G49060 | PUB32     | 309.115  | 255.1472 | 291.0099 | 268.0701 | 261.6746 | 330.9511 | 291.6915 | 253.5391 | 180.6055 | 304.1728 | 259.4151 | 262.0844  | -1.9E-05 | 1        | -0.23355 | 0.314245 | -0.05216 | 0.916225 |
| AT3G49070 | AT3G49070 | 1.188904 | 5.352738 | 5.150617 | 5.773818 | 5.962205 | 3.987363 | 7.114428 | 6.47334  | 4.88123  | 6.716749 | 2.660668 | 8.287252  | 0.329262 | 0.635767 | 0.479552 | 0.497722 | 0.455983 | NA       |
| AT3G49080 | AT3G49080 | 247.292  | 181.9931 | 224.0519 | 200.0216 | 220.6016 | 173.4503 | 152.9602 | 169.3857 | 244.0615 | 172.7164 | 188.9074 | 224.7917  | -0.13587 | 0.599703 | -0.20688 | 0.430254 | -0.15771 | 0.719342 |
| AT3G49100 | SRP9      | 45.17835 | 41.03766 | 47.64322 | 73.82239 | 99.37009 | 50.83888 | 83.59453 | 50.70783 | 99.57709 | 59.49121 | 47.89202 | 74.58527  | 0.693894 | 0.053827 | 0.74485  | 0.027576 | 0.408119 | 0.475332 |
| AT3G49110 | PER33     | 249.6698 | 192.6986 | 229.2025 | 297.764  | 324.609  | 348.8943 | 426.8657 | 395.9526 | 442.2394 | 192.8667 | 204.8714 | 212.3608  | 0.507713 | 0.000639 | 0.890774 | 4.55E-10 | -0.14798 | 0.622829 |
| AT3G49115 | AT3G49115 | 0        | 0        | 0        | 0        | 0        | 0        | 0        | 0        | 0        | 0        | 0        | 0         | #N/A     | #N/A     | #N/A     | #N/A     | #N/A     | #N/A     |
| AT3G49120 | PER34     | 1237.649 | 1265.03  | 1308.257 | 4544.407 | 4186.131 | 4674.186 | 4046.331 | 4128.912 | 3538.892 | 928.8305 | 1157.391 | 896.0591  | 1.794654 | 4.05E-52 | 1.602182 | 1.55E-41 | -0.35205 | 0.050976 |
| AT3G49130 | AT3G49130 | 0        | 1.784246 | 1.287654 | 6.598649 | 12.58688 | 11.96209 | 12.45025 | 14.02557 | 13.66744 | 0        | 2.660668 | 2.071813  | 1.908208 | 0.000819 | 2.229321 | 1.52E-05 | 0.113228 | NA       |
| AT3G49140 | AT3G49140 | 1242.405 | 1273.952 | 1294.093 | 981.9615 | 1051.998 | 1061.635 | 1181.884 | 1163.043 | 1132.445 | 1355.824 | 1370.244 | 1595.296  | -0.29891 | 0.005775 | -0.13067 | 0.299775 | 0.180898 | 0.294997 |
| AT3G49142 | PCMP-H77  | 17.83356 | 21.41095 | 18.02716 | 22.27044 | 13.91181 | 24.92102 | 24.9005  | 24.81447 | 26.35864 | 20.15025 | 29.26735 | 29.07018  | 0.07952  | 0.871533 | 0.379587 | 0.3968   | 0.408447 | 0.553047 |
| AT3G49150 | SRP9      | 1.188904 | 0        | 0        | 2.062078 | 1.324935 | 0        | 0.889303 | 0        | 1.952492 | 0.959536 | 0        | 2.071813  | 0.355421 | 0.601008 | 0.221566 | 0.765659 | 0.259626 | NA       |
| AT3G49160 | PKP4      | 281.7702 | 264.0684 | 288.4346 | 346.0167 | 376.2814 | 344.9069 | 362.8358 | 339.8503 | 320.2087 | 310.8895 | 292.6735 | 291.0897  | 0.347855 | 0.009725 | 0.287761 | 0.047869 | 0.097119 | 0.730345 |
| AT3G49162 | AT3G49162 | 0        | 0        | 0        | 0        | 0        | 0        | 0.889303 | 0        | 0        | 0        | 0        | 0         | 0        | NA       | 0        | NA       | 0        | NA       |
| AT3G49170 | EMB2261   | 61.82301 | 48.17464 | 46.35556 | 44.54088 | 37.09817 | 37.87995 | 56.91542 | 45.31338 | 45.88356 | 52.77446 | 47.89202 | 69.40574  | -0.36558 | 0.218046 | -0.07856 | 0.837892 | 0.113716 | 0.857736 |
| AT3G49180 | RD3       | 80.84547 | 62.44667 | 63.09506 | 73.82239 | 83.47088 | 83.47088 | 83.47088 | 78.25871 | 66.89118 | 91.76712 | 68.12703 | 67.84703  | 0.15136  | 0.586276 | 0.183569 | 0.532141 | 0.079633 | 0.888301 |
| AT3G49190 | AT3G49190 | 5.94452  | 7.136984 | 1.287654 | 0.412416 | 2.649869 | 0.996841 | 0        | 3.904984 | 0        | 2.660668 | 0        | 0         | -0.83192 | 0.21675  | -0.82433 | 0.237573 | -1.00694 | NA       |
| AT3G49200 | AT3G49200 | 0        | 0        | 0        | 0        | 0.662467 | 0        | 1.07889  | 0        | 0        | 0        | 0        | 0         | 0.098648 | NA       | 0.150881 | NA       | -0.35205 | 0.050976 |
| AT3G49210 | AT3G49210 | 26.15589 | 24.97944 | 27.04074 | 90.31901 | 69.55906 | 81.74094 | 80.92662 | 90.62675 | 59.55101 | 24.94793 | 18.62468 | 17.61041  | 1.533609 | 5.58E-08 | 1.461274 | 4.61E-07 | -0.31736 | 0.620802 |
| AT3G49220 | PME34     | 1251.916 | 954.5716 | 1032.699 | 444.1716 | 384.231  | 489.4488 | 270.3483 | 302.0892 | 233.3228 | 816.5648 | 831.4587 | 747.9245  | -1.28125 | 1.59E-18 | -1.97568 | 1.62E-40 | -0.43078 | 0.039616 |
| AT3G49230 | AT3G49230 | 0        | 0        | 0        | 0.412416 | 0        | 0        | 0.889303 | 0        | 0        | 1.330334 | 0        | 0         | 0.067751 | NA       | 0        | NA       | 0.180865 | NA       |
| AT3G49240 | EMB1796   | 244.9142 | 189.1301 | 187.9975 | 123.3123 | 166.9418 | 133.5767 | 161.8532 | 161.8335 | 216.7266 | 161.202  | 122.3907 | 167.8169  | -0.5441  | 0.011356 | -0.20132 | 0.435181 | -0.44683 | 0.167519 |
| AT3G49250 | DMS3      | 121.2682 | 121.3287 | 93.99877 | 89.9066  | 87.44568 | 88.71883 | 68.47637 | 97.10009 | 86.88589 | 121.861  | 95.78405 | 105.6625  | -0.32419 | 0.151455 | -0.40413 | 0.088455 | -0.04504 | 0.934368 |
| AT3G49260 | iqd21     | 508.8599 | 609.4244 | 715.9358 | 259.4094 | 251.0751 | 285.0965 | 273.9055 | 286.9847 | 228.4416 | 581.4786 | 525.4819 | 551.1023  | -1.25159 | 3.79E-16 | -1.25938 | 7.88E-16 | -0.20684 | 0.471543 |
| AT3G49270 | AT3G49270 | 0        | 0        | 0        | 0        | 0        | 0        | 1.07889  | 0        | 0        | 0        | 0        | 0         | 0        | NA       | 0.16673  | NA       | 0        | NA       |
| AT3G49280 | AT3G49280 | 0        | 0        | 0        | 0        | 0        | 0        | 0        | 0        | 0        | 1.330334 | 0        | 0         | 0        | NA       | 0        | NA       | 0.172362 | NA       |
| AT3G49290 | AB1L2     | 126.0238 | 137.3869 | 154.5185 | 122.075  | 111.2945 | 117.6272 | 149.403  | 133.7824 | 84.9334  | 160.2424 | 191.5681 | 145.0269  | -0.24204 | 0.335123 | -0.17526 | 0.532417 | 0.237539 | 0.563333 |
| AT3G49300 | AT3G49300 | 0        | 0        | 0        | 0        | 0        | 0        | 0        | 0        | 0        | 1.919071 | 1.330334 | 1.035907  | 0        | NA       | 0        | NA       | 0.751923 | NA       |
| AT3G49305 | AT3G49305 | 0        | 0        | 0        | 0        | 0        | 0        | 0        | 0        | 0        | 0        | 0        | 0         | #N/A     | #N/A     | #N/A     | #N/A     | #N/A     | #N/A     |
| AT3G49307 | AT3G49307 | 1.188904 | 0        | 0        | 0        | 0        | 0        | 0        | 0        | 0        | 0        | 0        | 0         | -0.2184  | NA       | -0.20558 | NA       | -0.19918 | NA       |
| AT3G49310 | AT3G49310 | 274.6368 | 256.9314 | 235.6407 | 252.3983 | 258.3622 | 263.166  | 245.4478 | 264.328  | 197.2017 | 225.4909 | 220.8354 | 222.7199  | 0.010168 | 0.962467 | -0.11791 | 0.549749 | -0.19439 | 0.493509 |
| AT3G49320 | AT3G49320 | 35.66712 | 24.79744 | 41.20494 | 46.60296 | 54.32232 | 35.86627 | 44.46517 | 36.68226 | 37.09735 | 34.54328 | 38.57969 | 34.18492  | 0.393744 | 0.223255 | 0.181169 | 0.646957 | 0.040633 | 0.961684 |
| AT3G49330 | AT3G49330 | 1.188904 | 7.136984 | 6.438272 | 4.948987 | 5.299738 | 3.987363 | 7.778607 | 0        | 2.928738 | 16.31211 | 10.64267 | 12.43088  | -0.64425 | 0.272792 | -1.52004 | 0.009854 | 0.53675  | NA       |
| AT3G49340 | AT3G49340 | 3.566712 | 7.136984 | 0        | 68.8734  | 58.29712 | 59.81045 | 78.25871 | 80.91675 | 42.98091 | 1.919071 | 3.991002 | 0         | 3.48482  | 8.59E-18 | 3.830407 | 2.82E-21 | -0.45585 | 0.664003 |
| AT3G49350 | AT3G49350 | 156.9353 | 183.7773 | 162.2444 | 187.2367 | 175.5538 | 219.305  | 181.4179 | 192.0424 | 144.4804 | 152.5662 | 148.9974 | 128.4524  | 0.206324 | 0.310975 | 0.407107 | 0.857215 | -0.21501 | 0.531961 |
| AT3G49360 | PGL2      | 71.33424 | 85.64381 | 82.40988 | 102.6915 | 85.45828 | 93.70303 | 82.70522 | 90.62675 | 104.4583 | 75.80331 | 89.13238 | 65.26211  | 0.241814 | 0.324502 | 0.213853 | 0.430254 | -0.05616 | 0.921991 |
| AT3G49370 | CRK6      | 28.53669 | 28.54794 | 32.19136 | 58.97543 | 64.92179 | 69.77885 | 66.69776 | 42.07671 | 48.8123  | 18.23118 | 17.29434 | 22.78994  | 1.046877 | 0.002093 | 0.77513  | 0.014191 | -0.55503 | 0.309162 |
| AT3G49380 | iqd15     | 1.188904 | 1.784246 | 0        | 3.71174  | 4.637271 | 1.993682 | 8.893035 | 5.39445  | 0.976246 | 3.838143 | 1.330334 | 4.143626  | 0.175504 | 0.257126 | 1.115984 | 0.099602 | 0.675985 | NA       |
| AT3G49390 | CD10      | 121.8138 | 276.5581 | 258.8185 | 362.9257 | 343.8205 | 316.9954 | 321.9279 | 318.2725 | 284.8076 | 252.3579 | 236.7994 | 240.3303  | 0.459288 | 0.002583 | 0.308798 | 0.060704 | -0.02621 | 0.949923 |
| AT3G49400 | AT3G49400 | 60.6341  | 60.66437 | 65.67037 | 48.66504 | 60.94699 | 49.84204 | 51.13682 | 63.65451 | 47.83605 | 56.61726 | 63.85603 | 43.50807  | -0.22291 | 0.445204 | -0.16309 | 0.622338 | -0.19073 | 0.717906 |
| AT3G49410 | AT3G49410 | 21.40027 | 28.54794 | 24.46543 | 18.97112 | 25.83622 | 29.90522 | 24.9005  | 14.02557 | 19.52492 | 16.31211 | 21.28534 | 29.00538  | -0.00715 | 0.989293 | -0.28686 | 0.546538 | -0.13125 | 0.882753 |
| AT3G49420 | AT3G49420 | 41.61164 | 35.68492 | 54.08148 | 74.64722 | 62.93439 | 62.80097 | 44.46517 | 45.1557  | 57.59851 | 37.42189 | 30.59768 | 42.47217  | 0.579294 | 0.036687 | 0.122639 | 0.745367 | -0.23909 | 0.676985 |
| AT3G49430 | SR34A     | 463.6725 | 415.7293 | 405.6111 | 542.7389 | 602.1828 | 501.4109 | 493.5634 | 487.6583 | 591.6051 | 450.0222 | 557.4099 | 413.3267  | 0.351469 | 0.032609 | 0.285104 | 0.107521 | 0.137023 | 0.662311 |
| AT3G49440 | AT3G49440 | 0        | 0        | 0        | 0        | 0        | 0        | 0        | 0        | 0        | 0        | 0        | 0         | #N/A     | #N/A     | #N/A     | #N/A     | #N/A     | #N/A     |
| AT3G49450 | AT3G49450 | 0        | 0        | 0        | 0.662467 | 0        | 0        | 0        | 0        | 0        | 0        | 0        | 0         | 0.128567 | NA       | 0        | NA       | 0        | NA       |
| AT3G49460 | AT3G49460 | 0        | 0        | 0        | 0        | 0        | 0        | 0        | 0        | 0        | 0        | 0        | 0         | #N/A     | #N/A     | #N/A     | #N/A     | #N/A     | #N/A     |
| AT3G49470 | NACA2     | 718.098  | 754.7361 | 809.9346 | 824.0063 | 868.4946 | 736.6653 | 848.3955 | 832.903  | 1181.258 | 894.2872 | 882.0114 | 998.6139  | 0.089427 | 0.652042 | 0.321123 | 0.065368 | 0.277248 | 0.281113 |
| AT3G49480 | AT3G49480 | 0        | 1.784246 | 1.287654 | 3.71174  | 0        | 0        | 3.557214 | 3.23667  | 3.904984 | 1.919071 | 0        | 0.2071813 | 0.139005 | 0.863244 | 0.766851 | 0.275096 | 0.138876 | NA       |
| AT3G49490 | AT3G49490 | 833.4217 | 761.8731 | 633.5259 | 588.1046 | 662.4673 | 683.8328 | 812.8234 |          |          |          |          |           |          |          |          |          |          |          |

|           |           |          |          |          |          |          |          |          |          |          |          |          |          |           |          |          |          |          |          |
|-----------|-----------|----------|----------|----------|----------|----------|----------|----------|----------|----------|----------|----------|----------|-----------|----------|----------|----------|----------|----------|
| AT3G49900 | AT3G49900 | 33.28931 | 53.52738 | 45.0679  | 40.00431 | 37.70663 | 50.83888 | 34.68284 | 35.60337 | 24.40615 | 50.85539 | 45.23135 | 51.79533 | -0.02916  | 0.942058 | -0.42694 | 0.215621 | 0.183955 | 0.764564 |
| AT3G49910 | RP12A6    | 1864.201 | 1709.308 | 1952.084 | 2554.914 | 2787.662 | 1983.713 | 1849.751 | 1705.725 | 3745.856 | 1686.864 | 1458.046 | 2437.488 | 0.386268  | 0.17921  | 0.381313 | 0.224525 | 0.014058 | 0.98659  |
| AT3G49920 | VDA6C5    | 39.23383 | 55.31163 | 42.49259 | 42.89122 | 39.08557 | 45.85468 | 30.23632 | 36.68226 | 35.14486 | 41.26003 | 53.21336 | 33.14901 | -0.07846  | 0.830967 | -0.38449 | 0.225844 | -0.09103 | 0.895197 |
| AT3G49925 | AT3G49925 |          |          |          |          |          |          |          |          |          |          |          |          | #N/A      | #N/A     | #N/A     | #N/A     | #N/A     | #N/A     |
| AT3G49930 | AT3G49930 | 9.511232 | 7.136984 | 14.1642  | 11.13522 | 11.92441 | 16.94629 | 8.893035 | 9.710009 | 15.61994 | 8.635821 | 10.64267 | 6.215439 | 0.271166  | 0.629089 | 0.102235 | 0.879853 | -0.25709 | NA       |
| AT3G49940 | LD38      | 97.49012 | 153.4452 | 146.7926 | 233.4272 | 213.3145 | 215.3176 | 174.3035 | 168.3068 | 209.8929 | 133.3755 | 146.3367 | 107.7343 | 0.73077   | 0.000242 | 0.473457 | 0.030752 | -0.02946 | 0.959697 |
| AT3G49950 | SLC32     | 8.322328 | 7.136984 | 1.287654 | 7.011065 | 6.62473  | 11.96209 | 16.00746 | 7.55223  | 13.66744 | 2.87607  | 3.991002 | 4.143626 | 0.431432  | 0.490566 | 0.916444 | 0.123304 | -0.46186 | NA       |
| AT3G49960 | PER35     | 8.322328 | 7.136984 | 2.575309 | 0.412416 | 0        | 0.996841 | 0        | 0        | 0.976246 | 5.757214 | 2.660668 | 1.035907 | -1.77102  | 0.004681 | -1.71125 | 0.007117 | -0.50875 | NA       |
| AT3G49970 | AT3G49970 | 32.10041 | 16.05821 | 25.75309 | 13.1973  | 15.23675 | 16.94629 | 15.11816 | 14.02557 | 2.928738 | 26.867   | 14.63367 | 24.86176 | -0.64943  | 0.153116 | -1.0429  | 0.02557  | -0.13997 | 0.889335 |
| AT3G49980 | AT3G49980 | 1.188904 | 1.784246 | 0        | 1.23747  | 3.974804 | 6.977885 | 2.66791  | 2.15778  | 0.976246 | 1.919071 | 1.330334 | 1.035907 | 0.937722  | 0.159974 | 0.357941 | 0.654285 | 0.172734 | NA       |
| AT3G49990 | AT3G49990 | 614.6633 | 545.9793 | 573.0062 | 409.1163 | 447.8279 | 454.5594 | 473.9988 | 496.2894 | 483.2418 | 477.8487 | 549.4279 | 568.7127 | -0.40507  | 0.001104 | -0.25487 | 0.062309 | -0.1226  | 0.604841 |
| AT3G50000 | CKA2      | 611.0966 | 622.7019 | 655.4161 | 720.9024 | 610.1324 | 692.8043 | 701.6604 | 692.6473 | 574.0326 | 513.3516 | 528.1426 | 545.9227 | 0.098845  | 0.524238 | 0.058435 | 0.742239 | -0.24849 | 0.23259  |
| AT3G50010 | AT3G50010 | 7.133424 | 5.352738 | 5.150617 | 7.011065 | 10.59948 | 11.96209 | 3.557214 | 4.31556  | 4.88123  | 4.797678 | 3.991002 | 2.071813 | 0.577321  | 0.337081 | -0.34696 | 0.632304 | -0.48679 | NA       |
| AT3G50020 | AT3G50020 | 0        | 0        | 0        | 0        | 0        | 0        | 0        | 0        | 0        | 0        | 1.330334 | 1.035907 | 0         | NA       | 0        | NA       | 0.375122 | NA       |
| AT3G50022 | AT3G50022 | 0        | 0        | 0        | 0        | 0        | 0        | 0        | 0        | 0        | 0        | 0        | 0        | #N/A      | #N/A     | #N/A     | #N/A     | #N/A     | #N/A     |
| AT3G50030 | AT3G50030 | 0        | 0        | 0        | 1.649662 | 2.649869 | 1.993682 | 0        | 4.31556  | 0.976246 | 0        | 1.330334 | 0        | 0.902791  | 0.138912 | 0.731917 | 0.255511 | 0.158509 | NA       |
| AT3G50040 | AT3G50040 | 21.40027 | 37.46917 | 14.1642  | 40.41673 | 42.39791 | 20.93366 | 30.23632 | 21.5778  | 25.3824  | 32.62421 | 33.25835 | 30.04129 | 0.527362  | 0.185301 | 0.114353 | 0.829184 | 0.391236 | 0.574689 |
| AT3G50050 | AT3G50050 | 131.9683 | 87.42806 | 86.27284 | 71.34789 | 84.79581 | 60.80729 | 78.25871 | 85.23231 | 54.66978 | 95.95356 | 90.46271 | 113.9497 | -0.47769  | 0.070245 | -0.47769 | 0.088623 | -0.03133 | 0.963148 |
| AT3G50060 | MYB77     | 101.0568 | 139.1712 | 75.97161 | 182.2877 | 141.768  | 221.2987 | 216.99   | 347.4026 | 397.3321 | 100.7512 | 95.78405 | 100.4829 | 0.754325  | 0.005598 | 1.540437 | 1.6E-09  | -0.07269 | 0.916503 |
| AT3G50070 | CYD3-3    | 161.6909 | 135.6027 | 171.258  | 267.6577 | 266.3118 | 237.2481 | 192.9789 | 200.6735 | 211.8454 | 176.5546 | 167.6221 | 210.2829 | 0.701165  | 1.24E-05 | 0.351747 | 0.055939 | 0.230983 | 0.441256 |
| AT3G50080 | FB116     | 194.9802 | 148.0924 | 140.3543 | 145.9591 | 172.904  | 177.4377 | 160.9639 | 166.1491 | 165.9618 | 145.8494 | 118.3997 | 137.7756 | 0.021233  | 0.934862 | 0.01993  | 0.941923 | -0.26092 | 0.433539 |
| AT3G50090 | SDN4      | 1.188904 | 0        | 0        | 0.412416 | 0        | 0        | 1.07889  | 0        | 0        | 0        | 0        | 0        | -0.13172  | NA       | -0.02794 | NA       | -0.21059 | NA       |
| AT3G50100 | SDN1      | 73.71204 | 99.91778 | 63.09506 | 48.66504 | 59.62205 | 79.74726 | 75.5908  | 45.31338 | 66.38473 | 77.72239 | 91.79304 | 91.15977 | -0.32529  | 0.283095 | -0.29788 | 0.367343 | 0.145629 | 0.80625  |
| AT3G50110 | ATPN3     | 73.71204 | 78.50683 | 64.38272 | 58.56301 | 60.28452 | 68.78201 | 40.90796 | 49.62894 | 41.00233 | 62.36982 | 53.21336 | 61.11849 | -0.20397  | 0.447323 | -0.68808 | 0.006991 | -0.26865 | 0.54288  |
| AT3G50120 | AT3G50120 | 15.45575 | 21.41095 | 19.31482 | 9.073143 | 13.24935 | 6.977885 | 15.11816 | 17.26224 | 22.45366 | 27.82653 | 25.27635 | 22.78994 | -0.797    | 0.057532 | -0.01579 | 0.97803  | 0.413569 | 0.563916 |
| AT3G50123 | AT3G50123 | 0        | 0        | 0        | 0        | 0        | 0        | 0        | 0        | 0        | 0        | 0        | 0        | #N/A      | #N/A     | #N/A     | #N/A     | #N/A     | #N/A     |
| AT3G50130 | AT3G50130 | 0        | 0        | 0        | 0.412416 | 2.649869 | 2.990522 | 0        | 5.39445  | 1.952492 | 2.87607  | 3.991002 | 4.143626 | 0.722238  | 0.285854 | 0.883196 | 0.197398 | 1.218754 | NA       |
| AT3G50140 | AT3G50140 | 10.70014 | 14.27397 | 6.438272 | 23.50769 | 29.81103 | 35.88627 | 20.45398 | 19.42002 | 28.31113 | 3.838143 | 9.312338 | 8.287252 | 1.334347  | 0.001405 | 0.992133 | 0.03029  | -0.43792 | 0.626543 |
| AT3G50150 | AT3G50150 | 0        | 0        | 0        | 0        | 0        | 0.996841 | 0        | 0        | 0        | 0        | 0        | 0        | 0.15625   | NA       | 0        | NA       | 0        | NA       |
| AT3G50160 | AT3G50160 | 0        | 0        | 0        | 0        | 0        | 0        | 0        | 0        | 0        | 0        | 0        | 0        | #N/A      | #N/A     | #N/A     | #N/A     | #N/A     | #N/A     |
| AT3G50170 | AT3G50170 | 1.188904 | 3.568492 | 2.575309 | 7.011065 | 4.637271 | 4.984204 | 0.889303 | 1.07889  | 1.952492 | 0        | 1.330334 | 1.035907 | 0.895468  | 0.178785 | -0.40093 | 0.615301 | -0.63999 | NA       |
| AT3G50180 | AT3G50180 | 0        | 1.784246 | 0        | 0        | 0        | 0.662467 | 0        | 0        | 0        | 0        | 0        | 0        | -0.12017  | NA       | -0.24312 | NA       | -0.23848 | NA       |
| AT3G50190 | AT3G50190 | 5.94452  | 12.48972 | 6.438272 | 14.84696 | 15.23675 | 17.94313 | 9.782338 | 12.94668 | 13.66744 | 2.87607  | 5.321336 | 5.179533 | 0.855362  | 0.002671 | 0.496986 | 0.391811 | -0.62663 | NA       |
| AT3G50200 | AT3G50200 | 0        | 0        | 0        | 7.42348  | 5.299738 | 11.96209 | 2.66791  | 3.23667  | 0.976246 | 0        | 0        | 0        | 2.273585  | 0.000138 | 0.945276 | 0.169409 | 0        | NA       |
| AT3G50210 | AT3G50210 | 74.90095 | 80.29107 | 75.97161 | 218.9927 | 227.2263 | 209.3366 | 184.0858 | 221.1724 | 245.0377 | 94.99403 | 91.79304 | 96.33931 | 1.472059  | 1.93E-16 | 1.455512 | 1.25E-15 | 0.285413 | 0.425308 |
| AT3G50220 | IRX15     | 5.94452  | 3.568492 | 10.30123 | 5.773818 | 3.974804 | 4.984204 | 0.889303 | 4.31556  | 4.88123  | 6.716749 | 3.991002 | 3.10772  | -0.3098   | 0.68044  | -0.69765 | 0.306423 | -0.37311 | NA       |
| AT3G50230 | AT3G50230 | 4.755616 | 3.568492 | 3.862963 | 7.011065 | 1.987402 | 1.993682 | 2.66791  | 4.31556  | 1.952492 | 0.959536 | 2.660668 | 8.287252 | -0.03194  | 0.969789 | -0.27259 | 0.741242 | -0.02102 | NA       |
| AT3G50240 | KICP-02   | 582.5629 | 513.8629 | 570.4309 | 217.7554 | 243.1255 | 264.1628 | 360.1679 | 332.2981 | 312.3987 | 565.1665 | 689.113  | 652.6211 | -1.19643  | 3.18E-19 | -0.72228 | 1.84E-07 | 0.186926 | 0.443671 |
| AT3G50250 | AT3G50250 | 1.188904 | 0        | 0        | 0        | 0        | 0        | 0        | 0        | 0        | 0        | 0        | 0        | -0.2184   | NA       | -0.20558 | NA       | -0.19918 | NA       |
| AT3G50260 | ERF011    | 1.188904 | 12.48972 | 6.438272 | 48.25262 | 62.93439 | 53.8294  | 44.46517 | 46.39227 | 71.26596 | 7.676285 | 5.321336 | 3.10772  | 2.686903  | 2.16E-11 | 2.657887 | 5.89E-11 | -0.16552 | 0.887    |
| AT3G50270 | AT3G50270 | 322.193  | 344.3595 | 338.6531 | 153.0062 | 155.6798 | 186.4092 | 296.1381 | 256.7758 | 235.2753 | 266.7509 | 268.7275 | 286.9461 | -0.14168  | 1.8E-12  | -0.34183 | 0.03533  | -0.28284 | 0.236522 |
| AT3G50280 | AT3G50280 | 11.88904 | 10.70548 | 20.60247 | 40.82914 | 41.73544 | 41.86731 | 22.23259 | 25.89336 | 37.09735 | 14.39303 | 21.28534 | 10.35907 | 1.360285  | 0.000197 | 0.843048 | 0.041059 | 0.024642 | 0.983814 |
| AT3G50290 | AT3G50290 | 0        | 1.784246 | 0        | 0        | 0        | 0        | 0        | 0        | 0        | 0        | 0        | 0        | -0.2184   | NA       | -0.20558 | NA       | -0.19918 | NA       |
| AT3G50295 | AT3G50295 | 0        | 0        | 0        | 0        | 0        | 0        | 0        | 0        | 0        | 0        | 0        | 0        | #N/A      | #N/A     | #N/A     | #N/A     | #N/A     | #N/A     |
| AT3G50300 | AT3G50300 | 1.188904 | 0        | 1.287654 | 3.299325 | 3.312336 | 0.996841 | 0        | 1.07889  | 1.952492 | 0        | 0        | 1.035907 | 0.70124   | 0.294812 | 0.03192  | 0.969758 | -0.27812 | NA       |
| AT3G50301 | AT3G50301 | 0        | 0        | 1.287654 | 0        | 0        | 0        | 0.889303 | 0        | 0        | 0        | 0        | 0        | -0.21946  | NA       | -0.0473  | NA       | -0.20113 | NA       |
| AT3G50310 | MAPKK20   | 1.188904 | 1.784246 | 5.150617 | 2.886909 | 4.637271 | 1.993682 | 4.446517 | 2.15778  | 5.857476 | 2.87607  | 0        | 0        | 0.146417  | 0.857889 | 0.372993 | 0.640526 | -0.58326 | NA       |
| AT3G50320 | AT3G50320 | 0        | 0        | 0        | 0        | 0        | 0        | 0        | 0        | 0        | 0        | 0        | 1.035907 | 0         | NA       | 0        | NA       | 0.172362 | NA       |
| AT3G50330 | HEC2      | 0        | 0        | 0        | 0        | 0        | 0.889303 | 0        | 0        | 0        | 0.959536 | 0        | 0        | 0         | NA       | 0.13694  | NA       | 0.147196 | NA       |
| AT3G50337 | AT3G50337 |          |          |          |          |          |          |          |          |          |          |          |          | #N/A      | #N/A     | #N/A     | #N/A     | #N/A     | #N/A     |
| AT3G50340 | AT3G50340 | 60.6341  | 58.88012 | 75.97161 | 47.01538 | 44.38531 | 50.83888 | 45.35448 | 35.60337 | 41.00233 | 48.93632 | 43.90102 | 44.54398 | -0.45136  | 0.082644 | -0.65001 | 0.016971 | -0.48824 | 0.225633 |
| AT3G50350 | AT3G50350 | 22.58917 | 46.3904  | 36.05432 | 32.99325 | 32.4609  | 22.92734 | 24.9005  | 23.73558 | 41.00233 | 47.01725 | 43.90102 | 42.47217 | -0.17943  | 0.060777 | -0.1801  | 0.684004 | 0.352271 | 0.56442  |
| AT3G50360 | CM120     | 337.6487 | 314.0273 | 345.0914 | 561.71   | 637.2935 | 537.2977 | 465.1057 | 445.5815 | 752.6857 | 393.4006 | 439.0102 | 389.5000 | 0.7178169 | 6.99E-05 | 0.717275 | 0.000355 | 0.282479 | 0.41486  |
| AT3G50370 | AT3G50370 | 1908.191 | 1357.811 | 1122.835 | 625.222  | 560.4473 | 841.3336 | 862.6244 | 1059.47  | 563.2939 | 1050.692 | 1017.705 | 889.8437 | -1.0707   | 8.26E-06 | -0.78745 | 0.001705 | -0.54635 | 0.133464 |
| AT3G50373 | AT3G50373 | 0        | 0        | 0        | 0.412416 | 0        | 0        | 0        | 0        | 0        | 0        | 0        | 0        | 0.095918  | NA       | 0        | NA       | 0        | NA       |
| AT3G50376 | AT3G50376 | 0        | 0        | 0        | 0.412416 | 0        |          |          |          |          |          |          |          |           |          |          |          |          |          |

|           |           |          |          |          |          |          |          |          |          |          |          |           |          |          |          |          |           |          |          |
|-----------|-----------|----------|----------|----------|----------|----------|----------|----------|----------|----------|----------|-----------|----------|----------|----------|----------|-----------|----------|----------|
| AT3G50770 | CML41     | 53.50068 | 57.09587 | 82.40988 | 428.4998 | 431.2662 | 320.9827 | 646.5236 | 662.4384 | 1027.987 | 23.98839 | 43.90102  | 50.75942 | 2.476669 | 6.87E-23 | 3.421485 | 2.26E-43  | -0.66036 | 0.134409 |
| AT3G50780 | AT3G50780 | 241.3475 | 165.9349 | 150.6556 | 126.1992 | 143.0929 | 145.5388 | 156.5174 | 151.0446 | 157.1756 | 213.0169 | 188.9074  | 185.4273 | -0.43163 | 0.032897 | -0.26479 | 0.246403  | 0.06595  | 0.887115 |
| AT3G50790 | AT3G50790 | 517.1732 | 606.6437 | 610.3482 | 327.0456 | 333.8835 | 323.9733 | 449.9876 | 400.2682 | 371.9492 | 383.3977 | 415.0642  | 607.0412 | -0.79928 | 5.09E-07 | -0.49295 | 0.00397   | -0.10345 | 0.768141 |
| AT3G50800 | AT3G50800 | 8.322328 | 3.568492 | 11.58889 | 26.80701 | 27.16116 | 29.90522 | 18.67537 | 24.81447 | 49.78855 | 2.878607 | 7.982004  | 12.43088 | 1.458641 | 0.001815 | 1.589934 | 0.000801  | -0.07822 | 0.954468 |
| AT3G50808 | AT3G50808 | 0        | 0        | 0        | 0        | 0        | 0        | 0        | 0        | 0        | 0        | 0         | 0        | #N/A     | #N/A     | #N/A     | #N/A      | #N/A     | #N/A     |
| AT3G50810 | AT3G50810 | 11.88904 | 12.48972 | 12.87654 | 56.91335 | 69.55906 | 43.86099 | 63.14055 | 42.07671 | 76.14719 | 17.27164 | 9.312338  | 8.287252 | 1.964751 | 5.68E-08 | 2.039293 | 2.38E-08  | -0.07604 | 0.946721 |
| AT3G50820 | PSB02     | 6725.63  | 8228.943 | 7344.78  | 4560.491 | 3939.693 | 3544.766 | 4176.169 | 4876.583 | 5235.607 | 8604.156 | 7829.015  | 9077.649 | -0.87534 | 1.54E-10 | -0.63312 | 7.06E-06  | 0.191922 | 0.443724 |
| AT3G50825 | AT3G50825 | 1.188904 | 8.92123  | 10.30123 | 4.536571 | 7.949607 | 3.987363 | 11.56095 | 1.07889  | 7.809968 | 5.757214 | 6.65167   | 11.39497 | -0.18848 | 0.80182  | 0.046907 | 0.955414  | 0.185066 | NA       |
| AT3G50830 | CORA13PM2 | 771.5987 | 872.4963 | 839.5506 | 651.6166 | 647.2305 | 631.9971 | 460.6592 | 483.3427 | 540.8403 | 630.4149 | 621.266   | 627.7594 | -0.35667 | 0.00141  | -0.73366 | 1.62E-11  | -0.39594 | 0.005088 |
| AT3G50835 | AT3G50835 | 0        | 1.784246 | 1.287654 | 0.412416 | 1.324935 | 0        | 0        | 0        | 0        | 0.959536 | 0         | 0        | -0.13132 | NA       | -0.50957 | 0         | -0.28785 | NA       |
| AT3G50840 | AT3G50840 | 356.6712 | 501.3731 | 369.5568 | 148.0572 | 119.2441 | 124.6051 | 190.3109 | 181.2535 | 169.8668 | 335.8375 | 385.7969  | 342.8851 | -1.59586 | 1.86E-22 | -1.14817 | 6.94E-12  | -0.19565 | 0.531312 |
| AT3G50845 | AT3G50845 | 32.10041 | 60.66437 | 51.50617 | 58.1506  | 85.45828 | 62.80097 | 47.13308 | 29.13003 | 74.1947  | 41.26003 | 59.86503  | 48.68761 | 0.494488 | 0.171719 | 0.075976 | 0.8575723 | 0.058099 | 0.949572 |
| AT3G50850 | AT3G50850 | 1.188904 | 1.784246 | 3.862963 | 7.42348  | 10.59948 | 4.984204 | 2.66791  | 4.31556  | 5.857476 | 2.878607 | 2.660668  | 5.179533 | 1.156524 | 0.058053 | 0.484302 | 0.513741  | 0.331592 | NA       |
| AT3G50860 | AT3G50860 | 67.76752 | 124.8972 | 75.97161 | 123.7247 | 122.5564 | 106.662  | 105.8271 | 90.62675 | 119.102  | 81.56053 | 90.46271  | 70.44164 | 0.413768 | 0.098997 | 0.253082 | 0.381007  | -0.11918 | 0.831738 |
| AT3G50870 | GATA18    | 4.755616 | 14.27397 | 6.438272 | 9.897974 | 6.624673 | 3.987363 | 6.225124 | 7.55223  | 2.928738 | 9.595356 | 9.312338  | 7.251346 | -0.12701 | 0.855268 | -0.4208  | 0.553212  | 0.087961 | 0        |
| AT3G50880 | AT3G50880 | 135.535  | 114.1917 | 149.3679 | 137.7468 | 151.0425 | 156.504  | 153.8495 | 110.0468 | 168.8906 | 122.8206 | 147.6671  | 154.3501 | 0.140054 | 0.56911  | 0.108964 | 0.689993  | 0.076095 | 0.878139 |
| AT3G50890 | ZHD7      | 72.52314 | 74.93833 | 68.24568 | 45.36571 | 49.68505 | 34.88943 | 32.90423 | 24.81447 | 46.85981 | 54.69353 | 75.82904  | 78.7289  | -0.67579 | 0.104517 | -0.9774  | 0.000657  | -0.04381 | 0.952222 |
| AT3G50895 | AT3G50895 | 0        | 0        | 0        | 0        | 0        | 0        | 0        | 0        | 0        | 0        | 0         | 0        | #N/A     | #N/A     | #N/A     | #N/A      | #N/A     | #N/A     |
| AT3G50900 | AT3G50900 | 11.88904 | 28.54794 | 12.87654 | 44.54088 | 41.73544 | 26.9147  | 40.01866 | 37.76115 | 107.3871 | 12.47396 | 23.94601  | 14.50269 | 0.96672  | 0.03075  | 1.582959 | 0.000279  | -0.04433 | 0.972523 |
| AT3G50910 | AT3G50910 | 103.4346 | 82.07532 | 82.40988 | 164.5538 | 115.9318 | 149.5261 | 184.0858 | 216.8569 | 174.748  | 76.76285 | 77.15937  | 99.44703 | 0.655203 | 0.002898 | 1.059378 | 6.07E-07  | -0.08407 | 0.878205 |
| AT3G50920 | LPPE1     | 72.52314 | 85.64381 | 113.3136 | 227.6534 | 230.5386 | 182.4219 | 136.0634 | 112.2046 | 121.0545 | 115.1443 | 109.0874  | 91.15977 | 1.209479 | 1.81E-09 | 0.429748 | 0.072741  | 0.206169 | 0.627815 |
| AT3G50925 | AT3G50925 | 1.188904 | 0        | 0        | 0        | 0        | 0        | 0        | 0        | 0        | 0        | 0         | 0        | -0.2184  | NA       | -0.20558 | NA        | -0.19918 | NA       |
| AT3G50930 | BCS1      | 139.1018 | 167.7191 | 132.6284 | 720.49   | 715.4647 | 947.9956 | 1153.427 | 1199.726 | 1084.609 | 103.6298 | 105.0964  | 117.0574 | 2.397531 | 2.79E-52 | 2.921586 | 1.72E-77  | -0.40895 | 0.153333 |
| AT3G50940 | AT3G50940 | 2.377808 | 1.784246 | 5.150617 | 2.062078 | 8.612075 | 1.993682 | 1.778507 | 2.22677  | 4.88123  | 7.676285 | 3.991002  | 1.035907 | 0.239563 | 0.760857 | 0.016768 | 0.985039  | 0.242733 | NA       |
| AT3G50950 | RPP13L4   | 1520.608 | 1670.054 | 1451.186 | 2291.381 | 2242.452 | 2652.593 | 2225.927 | 2312.061 | 1861.701 | 955.6975 | 995.0898  | 928.1722 | 0.624139 | 4.61E-07 | 0.459426 | 0.000374  | -0.68048 | 1.83E-06 |
| AT3G50960 | PLP3A     | 27.34479 | 30.33218 | 24.46543 | 27.21943 | 19.21155 | 26.9147  | 29.34701 | 18.34113 | 16.59618 | 60.45074 | 57.20436  | 45.57989 | -0.14485 | 0.733677 | -0.30389 | 0.479512  | 0.93565  | 0.030721 |
| AT3G50970 | WER2      | 24.96698 | 28.54794 | 29.61605 | 94.85558 | 73.53387 | 107.6588 | 117.3881 | 122.9935 | 105.4346 | 65.24842 | 51.88302  | 43.50807 | 1.621678 | 1.53E-13 | 1.941684 | 1.53E-13  | 0.882066 | 0.02113  |
| AT3G50980 | XERO1     | 1.188904 | 0        | 0        | 1.237247 | 0        | 0        | 1.778607 | 0        | 0        | 0        | 0         | 0        | 0.023428 | NA       | 0.080794 | NA        | -0.1876  | NA       |
| AT3G50990 | PER36     | 0        | 0        | 0        | 0        | 0        | 0        | 1.07889  | 0        | 0        | 0        | 0         | 0        | 0        | NA       | 0.16673  | NA        | 0        | NA       |
| AT3G51000 | AT3G51000 | 418.4942 | 430.0033 | 413.337  | 887.1059 | 938.7161 | 867.2515 | 823.495  | 783.2741 | 871.7877 | 473.0511 | 413.7339  | 430.9371 | 1.08604  | 5.99E-24 | 0.966752 | 1.17E-18  | 0.065707 | 0.805161 |
| AT3G51010 | AT3G51010 | 274.6368 | 287.2636 | 359.2556 | 448.7081 | 485.5885 | 366.8374 | 311.2562 | 344.1659 | 541.8165 | 365.5831 | 295.3341  | 334.5978 | 0.483263 | 0.034699 | 0.364332 | 0.142592  | 0.108836 | 0.830054 |
| AT3G51020 | AT3G51020 | 0        | 0        | 0        | 0.662467 | 0.996841 | 0        | 0        | 0.976246 | 0        | 0        | 0         | 0        | 0.275104 | NA       | 0.136472 | NA        | 0        | NA       |
| AT3G51030 | TRX1      | 15.45575 | 19.62671 | 27.04074 | 26.80701 | 27.16116 | 11.96209 | 18.67537 | 8.63112  | 18.54867 | 41.26003 | 29.26735  | 28.16776 | 0.110855 | 0.830508 | -0.36718 | 0.479651  | 0.556482 | 0.427048 |
| AT3G51040 | RTH       | 153.3686 | 171.2876 | 171.2876 | 229.8761 | 229.8761 | 228.7625 | 189.1426 | 204.9891 | 203.0592 | 195.7452 | 184.9164  | 180.2477 | 0.492376 | 0.001007 | 0.267012 | 0.123427  | 0.179924 | 0.531156 |
| AT3G51050 | AT3G51050 | 394.7161 | 358.6335 | 360.5432 | 333.2318 | 271.6116 | 386.7742 | 359.2786 | 375.4537 | 293.85   | 274.4272 | 266.0668  | 295.2334 | -0.17081 | 0.373489 | -0.11475 | 0.594758  | -0.40693 | 0.097698 |
| AT3G51057 | AT3G51057 | 0        | 0        | 0        | 0.662467 | 0        | 0        | 0        | 0        | 0        | 0        | 0         | 0        | 0.128567 | NA       | 0        | NA        | 0        | NA       |
| AT3G51060 | SR51      | 5.94452  | 7.136984 | 11.58889 | 12.78488 | 11.92441 | 10.96525 | 5.335821 | 5.39445  | 7.809968 | 9.595356 | 11.97301  | 14.50269 | 0.452596 | 0.406778 | -0.33203 | 0.60717   | 0.44068  | NA       |
| AT3G51070 | AT3G51070 | 36.85602 | 33.90067 | 30.9037  | 19.79595 | 17.88662 | 19.93682 | 19.56468 | 17.26224 | 14.64369 | 40.3005  | 38.57969  | 29.00538 | -0.76086 | 0.022508 | -0.89657 | 0.012385  | 0.080734 | 0.920201 |
| AT3G51075 | AT3G51075 | 23.77808 | 10.70548 | 12.87654 | 14.84696 | 19.87402 | 12.95893 | 14.22886 | 7.55223  | 26.35864 | 15.35257 | 18.62468  | 15.5386  | -0.01428 | 0.981347 | -0.00181 | 0.997983  | 0.019033 | 0.988816 |
| AT3G51080 | GATA6     | 98.67903 | 87.42806 | 81.12222 | 100.217  | 98.10815 | 94.69987 | 60.41784 | 61.5035  | 107.466  | 90.1768  | 91.79304  | 98.41112 | 0.082121 | 0.751699 | -0.53699 | 0.019004  | 0.153495 | 0.166553 |
| AT3G51090 | AT3G51090 | 41.61164 | 21.41095 | 57.94445 | 55.26369 | 52.33491 | 46.85152 | 70.24568 | 57.18117 | 51.74104 | 59.49121 | 58.53469  | 47.6517  | 0.302441 | 0.362294 | -0.09573 | 0.127836  | 0.387166 | 0.459233 |
| AT3G51100 | AT3G51100 | 130.7794 | 146.3082 | 198.2988 | 262.7087 | 259.6872 | 220.3018 | 248.1157 | 207.1469 | 265.5389 | 161.202  | 224.8264  | 183.3555 | 0.62825  | 0.001941 | 0.582789 | 0.005778  | 0.243688 | 0.516773 |
| AT3G51110 | AT3G51110 | 149.8019 | 140.9554 | 106.8753 | 101.0418 | 121.2315 | 139.5577 | 137.842  | 146.729  | 155.2321 | 111.3061 | 106.4267  | 120.2101 | -0.14719 | 0.538993 | 0.143227 | 0.575876  | -0.21942 | 0.567096 |
| AT3G51120 | AT3G51120 | 369.7491 | 292.6163 | 262.6815 | 208.6823 | 168.9292 | 237.2481 | 260.5659 | 278.3536 | 145.4607 | 256.196  | 274.0488  | 240.3303 | -0.5718  | 0.108931 | -0.42049 | 0.111476  | -0.25635 | 0.650065 |
| AT3G51130 | AT3G51130 | 190.2246 | 190.9143 | 240.7914 | 293.6399 | 262.9995 | 316.9954 | 312.1455 | 336.6137 | 294.8263 | 186.1499 | 199.5501  | 187.4991 | 0.475274 | 0.002723 | 0.58691  | 0.000228  | -0.12179 | 0.718015 |
| AT3G51135 | AT3G51135 | 0        | 0        | 0        | 0        | 0        | 0        | 0        | 0        | 0        | 0        | 0         | 0        | #N/A     | #N/A     | #N/A     | #N/A      | #N/A     | #N/A     |
| AT3G51140 | AT3G51140 | 539.7624 | 597.7224 | 588.458  | 452.4199 | 457.7649 | 487.4551 | 555.8147 | 559.9439 | 622.8449 | 679.5312 | 615.9446  | 566.6409 | -0.30184 | 0.019037 | 0.012596 | 0.944733  | 0.11313  | 0.647526 |
| AT3G51150 | AT3G51150 | 477.9394 | 422.8663 | 422.3506 | 229.7155 | 187.4782 | 222.2955 | 272.1269 | 268.6436 | 248.5702 | 457.6985 | 419.0552  | 422.6499 | -1.03646 | 2.04E-15 | -0.71987 | 1.12E-07  | -0.02676 | 0.940496 |
| AT3G51160 | MUR1      | 442.2723 | 419.2978 | 383.7821 | 421.9011 | 437.8909 | 456.5531 | 370.8396 | 398.1104 | 449.0732 | 316.6468 | 331.2532  | 315.9515 | 0.076435 | 0.634535 | -0.0324  | 0.86395   | -0.36662 | 0.840855 |
| AT3G51171 | AT3G51171 | 0        | 0        | 0        | 0        | 0        | 0        | 0        | 0        | 0        | 0        | 0.3991002 | 0        | 0        | NA       | 0        | NA        | 0        | NA       |
| AT3G51180 | AT3G51180 | 29.7226  | 30.33218 | 25.75309 | 20.20836 | 24.51129 | 35.88627 | 32.01493 | 24.81447 | 23.4299  | 29.7456  | 17.29434  | 24.86176 | -0.11919 | 0.789482 | -0.07815 | 0.876889  | -0.20829 | 0.786409 |
| AT3G51190 | RPL8B     | 0        | 0        | 0        | 0        | 0        | 0        | 0        | 0        | 0        | 0        | 1.919071  | 0        | 0        | NA       | 0        | NA        | 0</      |          |



|           |           |          |          |          |          |          |          |          |          |          |          |          |          |          |          |          |          |          |          |
|-----------|-----------|----------|----------|----------|----------|----------|----------|----------|----------|----------|----------|----------|----------|----------|----------|----------|----------|----------|----------|
| AT3GS2560 | UEV1D     | 554.0292 | 617.3491 | 612.9235 | 670.1753 | 657.83   | 611.0634 | 565.597  | 544.8394 | 758.5431 | 613.1433 | 673.149  | 553.1741 | 0.120859 | 0.51481  | 0.067359 | 0.751464 | 0.043012 | 0.912004 |
| AT3GS2561 | AT3GS2561 | 0        | 0        | 0        | 0        | 0        | 0        | 0        | 0        | 0        | 0        | 0        | 0        | #N/A     | #N/A     | #N/A     | #N/A     | #N/A     | #N/A     |
| AT3GS2565 | AT3GS2565 | 0        | 0        | 0        | 0        | 0        | 0        | 0.889303 | 0        | 0        | 0.959536 | 0        | 0        | 0        | NA       | 1.31694  | NA       | 0.147196 | NA       |
| AT3GS2570 | AT3GS2570 | 43.98945 | 60.66437 | 55.36914 | 97.74249 | 81.48347 | 71.77254 | 58.69403 | 75.5223  | 76.14719 | 47.01725 | 54.54369 | 45.57989 | 0.655029 | 0.009746 | 0.38677  | 0.186673 | -0.10883 | 0.861847 |
| AT3GS2580 | RP514C    | 389.9605 | 440.7088 | 506.0482 | 601.3019 | 534.6111 | 554.2435 | 345.0498 | 404.5837 | 518.3866 | 459.6176 | 359.1902 | 579.0717 | 0.330388 | 0.130895 | -0.07429 | 0.793624 | 0.065579 | 0.893228 |
| AT3GS2590 | RLA0B     | 1635.932 | 1463.682 | 1734.47  | 2535.531 | 2565.073 | 1728.522 | 1689.677 | 1350.77  | 3027.339 | 1579.396 | 1955.591 | 2393.856 | 0.473388 | 0.082929 | 0.312367 | 0.311575 | 0.255289 | 0.595278 |
| AT3GS2600 | CWINV2    | 0        | 0        | 0        | 0.412416 | 0        | 1.993682 | 0.889303 | 2.15778  | 0        | 0        | 1.330334 | 0        | 0.356609 | NA       | 0.470757 | NA       | 0.184621 | NA       |
| AT3GS2605 | AT3GS2605 | 0        | 0        | 0        | 0        | 0        | 0.662467 | 0        | 0        | 0        | 0        | 0        | 0        | 0.128567 | NA       | 0        | NA       | 0        | NA       |
| AT3GS2610 | AT3GS2610 | 99.86793 | 98.13353 | 81.12222 | 89.9066  | 88.10815 | 90.71251 | 73.81219 | 80.91675 | 105.4346 | 92.11542 | 69.17737 | 62.15439 | -0.05023 | 0.868202 | -0.09625 | 0.759849 | -0.29938 | 0.474179 |
| AT3GS2620 | AT3GS2620 | 0        | 0        | 0        | 0        | 0        | 0        | 0        | 0        | 0        | 0        | 0        | 0        | #N/A     | #N/A     | #N/A     | #N/A     | #N/A     | #N/A     |
| AT3GS2630 | RP3A3     | 26.15589 | 28.54794 | 43.78025 | 45.77813 | 31.79843 | 30.90206 | 13.33955 | 6.47334  | 24.40615 | 31.66468 | 14.63367 | 53.86714 | 0.135309 | 0.806373 | -0.96829 | 0.040933 | 0.033947 | 0.978296 |
| AT3GS2640 | AT3GS2640 | 330.5153 | 388.9656 | 312.9    | 323.7462 | 315.9969 | 361.8532 | 362.8358 | 354.9548 | 218.6791 | 268.67   | 266.0668 | 325.2747 | -0.0408  | 0.979656 | -0.13314 | 0.606334 | -0.25161 | 0.485228 |
| AT3GS2660 | AT3GS2660 | 221.1361 | 276.5581 | 280.7086 | 235.0769 | 197.4152 | 203.3555 | 220.5473 | 213.6202 | 173.7718 | 241.803  | 264.7365 | 257.9407 | -0.27557 | 0.124841 | -0.34454 | 0.063159 | -0.02223 | 0.961633 |
| AT3GS2670 | AT3GS2670 | 33.28931 | 46.3904  | 34.76667 | 26.80701 | 23.18635 | 25.91786 | 36.46144 | 32.3667  | 37.09735 | 36.46235 | 49.22236 | 45.57989 | -0.53289 | 0.091139 | -0.08017 | 0.849386 | 0.199745 | 0.745161 |
| AT3GS2680 | AT3GS2680 | 35.66712 | 39.25341 | 38.62963 | 47.84021 | 41.73544 | 48.8452  | 39.12935 | 42.07671 | 31.23987 | 59.49121 | 38.57969 | 48.68761 | 0.272802 | 0.399152 | -0.01254 | 0.976765 | 0.368314 | 0.47064  |
| AT3GS2690 | AT3GS2690 | 0        | 0        | 0        | 0        | 0        | 0        | 0        | 0        | 0        | 0        | 0        | 0        | #N/A     | #N/A     | #N/A     | #N/A     | #N/A     | #N/A     |
| AT3GS2700 | AT3GS2700 | 1.188904 | 0        | 0        | 0        | 0        | 0        | 0        | 0        | 0.976246 | 0        | 0        | 0        | -0.21061 | NA       | -0.03092 | NA       | -0.19245 | NA       |
| AT3GS2705 | AT3GS2705 | 0        | 0        | 0        | 0.412416 | 0        | 0.996841 | 0.889303 | 0        | 0        | 0        | 0        | 0        | 0.238153 | NA       | 0.155534 | NA       | 0.178793 | NA       |
| AT3GS2710 | AT3GS2710 | 143.8574 | 146.3082 | 114.6012 | 236.3141 | 231.2011 | 236.2513 | 241.8905 | 233.0402 | 227.4653 | 102.6703 | 97.11438 | 85.98024 | 0.790217 | 5.76-07  | 0.787213 | 1.21E-06 | -0.48458 | 0.054175 |
| AT3GS2720 | ACA1      | 460.1058 | 324.7328 | 494.4593 | 133.6226 | 133.1559 | 146.5356 | 106.7164 | 77.68008 | 100.5533 | 724.4494 | 645.212  | 545.9227 | -1.59851 | 1.6E-18  | -2.1043  | 9.91E-29 | 0.564756 | 0.02166  |
| AT3GS2730 | AT3GS2730 | 340.0265 | 344.3595 | 323.2012 | 583.9805 | 633.3187 | 541.5689 | 341.4925 | 271.8803 | 578.9139 | 81.55659 | 529.4729 | 378.1050 | 0.69941  | 0.005554 | 0.232951 | 0.447401 | 0.372468 | 0.374513 |
| AT3GS2740 | AT3GS2740 | 40.42273 | 82.07532 | 61.80741 | 98.97974 | 80.82101 | 53.8294  | 64.47264 | 44.23449 | 89.81463 | 81.56053 | 78.4897  | 88.0525  | 0.354737 | 0.314914 | 0.093415 | 0.834365 | 0.41952  | 0.447512 |
| AT3GS2742 | AT3GS2742 | 3.566712 | 0        | 0        | 2.474493 | 0.662467 | 0.996841 | 0.889303 | 1.07889  | 0.976246 | 0.959536 | 0        | 1.035907 | 0.092823 | 0.908629 | -0.13266 | 0.871814 | -0.25811 | NA       |
| AT3GS2748 | AT3GS2748 | 8.323228 | 1.784246 | 7.725926 | 30.10634 | 33.12336 | 23.92418 | 32.01493 | 10.7889  | 17.57243 | 5.757214 | 7.982004 | 7.251246 | 1.822142 | 7.56E-05 | 1.342877 | 0.006909 | 0.070309 | NA       |
| AT3GS2750 | FTS2-2    | 485.0728 | 510.2944 | 536.9519 | 258.5846 | 187.4782 | 308.0238 | 339.7139 | 320.4303 | 235.2753 | 617.9409 | 522.8213 | 612.2208 | -1.00085 | 1.46E-07 | -0.75403 | 0.000139 | 0.191007 | 0.604655 |
| AT3GS2760 | AT3GS2760 | 145.0463 | 123.113  | 126.1901 | 124.5495 | 146.4053 | 110.6493 | 109.3843 | 126.2301 | 169.8668 | 118.0229 | 123.7211 | 114.9856 | -0.04567 | 0.871125 | 0.032875 | 0.914018 | -0.14669 | 0.743249 |
| AT3GS2765 | AT3GS2765 | 0        | 0        | 0        | 0        | 0        | 0        | 0        | 0        | 0        | 0        | 0        | 0        | #N/A     | #N/A     | #N/A     | #N/A     | #N/A     | #N/A     |
| AT3GS2770 | ZPR3      | 14.26685 | 10.70548 | 11.58889 | 16.08421 | 18.54908 | 10.96525 | 24.01119 | 19.42002 | 32.21612 | 13.4335  | 26.60668 | 15.5386  | 0.267189 | 0.600865 | 0.90159  | 0.044635 | 0.468644 | 0.553236 |
| AT3GS2780 | PAP20     | 0        | 0        | 5.150617 | 3.299325 | 3.974804 | 13.95577 | 1.778607 | 3.23667  | 1.952492 | 0        | 0        | 0        | 1.121092 | 0.087337 | 0.150364 | 0.8634   | -0.7675  | NA       |
| AT3GS2790 | AT3GS2790 | 0        | 1.784246 | 0        | 0        | 0        | 1.324935 | 0        | 0.889303 | 0        | 0        | 0        | 0        | 0.225404 | NA       | -0.10201 | NA       | -0.27077 | NA       |
| AT3GS2800 | SAP6      | 307.9261 | 265.8527 | 257.5309 | 456.544  | 471.6767 | 599.1013 | 619.8445 | 610.6517 | 102.7071 | 252.3579 | 266.0668 | 242.4021 | 0.845017 | 0.000063 | 1.395846 | 7.13E-12 | -0.12663 | 0.788696 |
| AT3GS2810 | PAP21     | 1.188904 | 1.784246 | 0        | 0        | 0        | 0        | 0.889303 | 0        | 0        | 1.919071 | 0        | 0.207183 | -0.59067 | NA       | -0.31423 | NA       | 0.214694 | NA       |
| AT3GS2820 | PAP22     | 2.377808 | 0        | 7.725926 | 5.73818  | 5.299738 | 5.981045 | 6.225124 | 5.39445  | 0.976246 | 5.757214 | 6.65167  | 5.179533 | 0.43297  | 0.533284 | 0.129593 | 0.878821 | 0.494987 | NA       |
| AT3GS2830 | AT3GS2830 | 1.188904 | 0        | 0        | 0        | 0        | 0        | 0.889303 | 0        | 0        | 0        | 0        | 0        | -0.2447  | NA       | -0.0484  | NA       | -0.02732 | NA       |
| AT3GS2840 | BGAL2     | 1404.096 | 1461.297 | 1444.748 | 489.9497 | 437.2284 | 631.0002 | 695.4353 | 623.5984 | 464.6931 | 1546.771 | 1515.25  | 1671.953 | -1.44206 | 7.35E-19 | -1.24627 | 3.57E-14 | 0.133239 | 0.699592 |
| AT3GS2850 | VSR1      | 1293.527 | 1288.226 | 1221.984 | 1146.515 | 1209.003 | 1291.906 | 1438.893 | 1527.708 | 1212.498 | 1261.789 | 1217.256 | 1165.395 | -0.06142 | 0.863291 | 0.134466 | 0.349072 | -0.06077 | 0.821894 |
| AT3GS2860 | MED28     | 39.23383 | 35.68492 | 48.93086 | 49.90228 | 52.33491 | 39.87363 | 37.35075 | 33.44559 | 57.59851 | 33.40996 | 57.20436 | 49.72351 | 0.189645 | 0.594496 | 0.040423 | 0.926949 | 0.204544 | 0.74422  |
| AT3GS2870 | AT3GS2870 | 293.6593 | 353.2807 | 302.5988 | 550.5748 | 509.4373 | 622.0286 | 668.7562 | 672.1484 | 718.5171 | 367.5021 | 420.3855 | 348.0646 | 0.816849 | 2.00E-09 | 1.10852  | 1.57E-16 | 0.257475 | 0.724918 |
| AT3GS2880 | ATMDAR1   | 2219.684 | 2412.301 | 2302.326 | 3112.913 | 2738.64  | 2850.965 | 2371.772 | 2890.346 | 2987.313 | 2221.325 | 2172.435 | 2091.495 | 0.325711 | 0.007347 | 0.248421 | 0.055714 | -0.09506 | 0.691846 |
| AT3GS2890 | KIPK      | 44.85349 | 474.6094 | 450.679  | 236.7265 | 229.8761 | 312.0112 | 269.459  | 283.7481 | 158.1519 | 133.1701 | 363.1812 | 438.1885 | -0.79702 | 0.000123 | -0.91741 | 1.16E-05 | -0.14369 | 0.742101 |
| AT3GS2900 | AT3GS2900 | 80.44547 | 69.58556 | 73.3963  | 44.54088 | 72.20893 | 47.84836 | 36.46144 | 31.28781 | 48.40963 | 49.93127 | 109.0874 | 105.6625 | -0.40943 | 0.297216 | -0.39139 | 0.352296 | 0.607626 | 0.727331 |
| AT3GS2905 | AT3GS2905 | 29.7226  | 48.17464 | 46.35556 | 74.2348  | 64.25933 | 77.75358 | 85.37313 | 45.31338 | 80.05217 | 55.65307 | 31.92802 | 51.79533 | 0.7602   | 0.014623 | 0.732161 | 0.025292 | 0.18109  | 0.791193 |
| AT3GS2910 | GRF4      | 107.0014 | 78.50683 | 105.5877 | 98.97974 | 134.4809 | 86.72515 | 86.26244 | 90.62675 | 97.6246  | 131.4564 | 145.0064 | 103.5907 | 0.125027 | 0.664256 | -0.09517 | 0.769772 | 0.353769 | 0.366129 |
| AT3GS2920 | AT3GS2920 | 380.4493 | 428.2119 | 403.0358 | 383.9589 | 425.9665 | 372.8185 | 305.0311 | 360.3491 | 502.6647 | 516.1696 | 516.1696 | 485.8402 | -0.03159 | 0.898267 | -0.05045 | 0.844067 | 0.281586 | 0.344711 |
| AT3GS2930 | AT3GS2930 | 2184.017 | 1796.736 | 1926.331 | 1481.809 | 1489.889 | 1549.091 | 1372.195 | 1594.599 | 1946.635 | 1932.505 | 1874.441 | 1775.544 | -0.38196 | 0.009365 | -0.26335 | 0.09887  | -0.08142 | 0.79348  |
| AT3GS2940 | FK        | 170.0133 | 155.2294 | 167.3951 | 111.7646 | 117.2567 | 140.5545 | 83.59453 | 106.8101 | 128.8645 | 136.2541 | 117.0694 | 188.535  | -0.41232 | 0.080028 | -0.60901 | 0.010252 | -0.14861 | 0.751589 |
| AT3GS2941 | AT3GS2941 | 0        | 0        | 0        | 0        | 0        | 0        | 0        | 0        | 0        | 0        | 0        | 0        | #N/A     | #N/A     | #N/A     | #N/A     | #N/A     | #N/A     |
| AT3GS2950 | CBSC8PB3  | 173.58   | 196.2671 | 162.2444 | 185.1746 | 183.5034 | 185.4124 | 206.3184 | 209.3046 | 203.0592 | 158.3234 | 182.2558 | 183.3555 | 0.065618 | 0.741386 | 0.222187 | 0.220288 | -0.01734 | 0.97028  |
| AT3GS2955 | AT3GS2955 | 0        | 0        | 0        | 0        | 0        | 0        | 0        | 0        | 0        | 0        | 0        | 0        | #N/A     | #N/A     | #N/A     | #N/A     | #N/A     | #N/A     |
| AT3GS2957 | AT3GS2957 | 0        | 0        | 0        | 0        | 0        | 0        | 0.889303 | 0        | 0        | 1.919071 | 0        | 0        | 0        | NA       | 0.132627 | NA       | 0.281224 | NA       |
| AT3GS2960 | PRXIE     | 1404.096 | 1006.315 | 1059.74  | 706.4679 | 801.5854 | 622.0286 | 723.893  | 763.8541 | 1401.889 | 1064.125 | 1344.968 | 1128.102 | -0.67672 | 0.005427 | -0.25473 | 0.37705  | 0.02512  | 0.970734 |
| AT3GS2970 | CYP76G1   | 0        | 0        | 0        | 0        | 0        | 0        | 0.889303 | 0        | 0        | 0        | 0        | 0        | 0        | NA       | 0.160764 | NA       | 0        | NA       |
| AT3GS2980 | AT3GS2980 | 0        | 0        | 0        | 0        | 0        | 0.662467 | 0        | 1.07889  | 0        | 0        | 0        | 0        | 0.098648 | NA       | 0.150881 | NA       | 0        | NA       |
| AT3GS2990 | AT3GS2990 | 972.5234 | 979.5511 | 956.7272 | 947.731  | 948.6531 | 1066.62  | 1187.22  | 1204.041 | 1122.683 | 905.8016 | 904.6271 | 969.6085 | 0.023757 | 0.863423 | 0.271025 | 0.012364 | -0.06412 | 0.77353  |
| AT3GS3000 | PP2A15    | 219.9472 | 251.5787 | 217.6136 | 289.5157 | 324.609  | 326.9638 | 322.8172 | 269.7225 | 287.9226 | 237.9648 | 234.1388 | 223.7558 | 0.4      |          |          |          |          |          |



|           |           |          |          |          |          |          |          |          |          |          |          |          |          |           |          |          |          |          |          |
|-----------|-----------|----------|----------|----------|----------|----------|----------|----------|----------|----------|----------|----------|----------|-----------|----------|----------|----------|----------|----------|
| AT3G54400 | AT3G54400 | 1039.102 | 581.6642 | 655.4161 | 335.2939 | 274.2615 | 315.9985 | 223.2152 | 230.8824 | 232.3465 | 491.2822 | 506.8572 | 499.3069 | -1.26652  | 2.41E-11 | -1.68522 | 8.85E-19 | -0.59235 | 0.023853 |
| AT3G54410 | AT3G54410 | 0        | 1.784246 | 0        | 0.824831 | 1.987402 | 3.987363 | 2.66791  | 0        | 0.99536  | 0        | 0        | 0        | 0.647994  | 0.303652 | 0.167934 | 0.824958 | -0.10213 | NA       |
| AT3G54420 | ATEP3     | 27.34479 | 17.84246 | 29.61605 | 70.11065 | 47.69764 | 79.74726 | 46.24378 | 52.86561 | 68.33722 | 23.02886 | 22.61568 | 21.75404 | 1.272051  | 0.000044 | 1.046773 | 0.001534 | -0.16589 | 0.836577 |
| AT3G54430 | SRS6      | 91.5456  | 66.0171  | 72.10864 | 73.40997 | 67.57166 | 45.85468 | 48.91169 | 26.97225 | 43.93107 | 68.12703 | 106.4267 | 67.33392 | -0.27007  | 0.417007 | -0.87797 | 0.004512 | 0.051569 | 0.946861 |
| AT3G54440 | AT3G54440 | 951.1232 | 769.01   | 727.5247 | 444.1716 | 420.6667 | 529.3225 | 609.1729 | 676.464  | 428.572  | 818.4839 | 827.4677 | 835.9766 | -0.79783  | 7.96E-06 | -0.50403 | 0.008318 | 0.018464 | 0.971473 |
| AT3G54450 | NPS4.0    | 1.188904 | 0        | 0        | 0.412416 | 0.662467 | 0        | 0        | 2.15778  | 0        | 0.995936 | 0        | 1.039597 | -0.05191  | NA       | 0.122536 | NA       | 0.125584 | NA       |
| AT3G54460 | AT3G54460 | 486.8774 | 756.5203 | 691.4704 | 363.7505 | 367.0069 | 499.4172 | 395.74   | 424.0037 | 218.6791 | 701.4205 | 709.068  | 767.6067 | -0.87489  | 5.91E-05 | -1.10712 | 3.17E-07 | -0.07416 | 0.88773  |
| AT3G54470 | PYRE-F    | 400.6051 | 367.5547 | 409.4741 | 233.4272 | 206.0273 | 232.2639 | 184.0858 | 215.778  | 252.8477 | 363.664  | 231.4781 | 320.0951 | -0.80434  | 1.06E-05 | -1.04143 | 1.52E-06 | -0.35827 | 0.218328 |
| AT3G54480 | SKIP5     | 303.1705 | 244.4417 | 347.6667 | 377.3603 | 394.8305 | 351.8848 | 313.0348 | 304.247  | 371.9497 | 374.2189 | 313.9588 | 299.377  | 0.316462  | 0.074381 | 0.133802 | 0.528331 | 0.133162 | 0.696325 |
| AT3G54490 | NRPE5C    | 1.188904 | 1.784246 | 2.575309 | 0.260208 | 0.662467 | 0.996841 | 0.889303 | 0        | 0.976246 | 0.995936 | 2.660668 | 3.10772  | -0.20567  | 0.797246 | -0.5337  | 0.473862 | 0.143924 | NA       |
| AT3G54500 | AT3G54500 | 3835.404 | 4287.543 | 3969.838 | 1893.812 | 1710.49  | 1924.9   | 1171.213 | 1069.18  | 571.1039 | 3750.825 | 3707.641 | 3599.775 | -2.04125  | 1.11E-25 | -2.04125 | 1.11E-25 | -0.12508 | 0.779385 |
| AT3G54510 | AT3G54510 | 20.21137 | 12.48972 | 33.47901 | 4.948987 | 1.324935 | 5.981045 | 1.778607 | 3.23667  | 0.976246 | 20.15025 | 21.28534 | 14.50269 | -2.00321  | 3.0E-05  | -2.50842 | 1.04E-06 | -0.22698 | NA       |
| AT3G54520 | AT3G54520 | 0        | 0        | 0        | 0        | 0        | 0        | 0        | 0        | 0        | 0        | 0        | 0        | #N/A      | #N/A     | #N/A     | #N/A     | #N/A     | #N/A     |
| AT3G54530 | AT3G54530 | 0        | 0        | 0        | 0.824831 | 0        | 0        | 0.889303 | 0        | 0.976246 | 0        | 0        | 0        | 0.1597    | NA       | 0.308877 | NA       | 0        | NA       |
| AT3G54540 | ABCF4     | 760.8985 | 640.5443 | 582.0198 | 414.4777 | 423.9791 | 478.4836 | 506.0137 | 538.3661 | 418.8095 | 538.2995 | 461.6259 | 550.0664 | -0.58592  | 0.000147 | -0.43358 | 0.008059 | -0.34925 | 0.13409  |
| AT3G54550 | AT3G54550 | 0        | 0        | 0        | 1.649662 | 1.987402 | 4.984204 | 4.446517 | 4.31556  | 1.952492 | 0        | 0        | 0        | 1.155864  | 0.066562 | 1.370034 | 0.030464 | 0        | NA       |
| AT3G54560 | H2AV      | 197.3581 | 146.3082 | 185.4222 | 276.7309 | 302.7475 | 225.286  | 155.6281 | 117.599  | 273.3489 | 203.4216 | 226.1568 | 257.9407 | 0.573762  | 0.037015 | 0.040131 | 0.916783 | 0.353765 | 0.44735  |
| AT3G54570 | AT3G54570 | 0        | 0        | 0        | 0        | 0        | 0        | 2.66791  | 0        | 0        | 0        | 0        | 0        | 0.335767  | NA       | 0        | NA       | 0        | NA       |
| AT3G54580 | AT3G54580 | 0        | 0        | 0        | 0        | 0.662467 | 0        | 0.889303 | 0        | 0        | 0        | 0        | 0        | 0.097058  | NA       | 0.130384 | NA       | 0        | NA       |
| AT3G54590 | ATHRGP1   | 0        | 0        | 0        | 0        | 0        | 0        | 0        | 0        | 0.976246 | 0        | 0        | 0        | 0         | NA       | 0.16673  | NA       | 0        | NA       |
| AT3G54600 | D1JF      | 1083.091 | 656.6025 | 777.7432 | 409.9411 | 400.1302 | 402.7237 | 425.0871 | 475.7905 | 574.0326 | 1049.732 | 912.6091 | 856.6947 | -1.03108  | 1.68E-08 | -0.75622 | 6.64E-05 | 0.156564 | 0.676985 |
| AT3G54610 | HAG1      | 102.2457 | 126.6815 | 101.7247 | 110.115  | 87.44568 | 115.6335 | 114.7201 | 103.5734 | 82.00466 | 60.60099 | 81.15037 | 84.94434 | -0.06739  | 8.007817 | -0.12176 | 0.667297 | -0.39722 | 0.260845 |
| AT3G54620 | BZIP25    | 687.1865 | 818.9689 | 857.5778 | 1127.132 | 1277.237 | 1364.675 | 1334.845 | 1396.084 | 1190.044 | 821.3625 | 840.7711 | 739.6373 | 0.664326  | 5.97E-07 | 0.722359 | 5.8E-08  | 0.023559 | 0.950218 |
| AT3G54625 | AT3G54625 | 1.188904 | 0        | 0        | 0        | 0        | 0        | 0.996841 | 0        | 0        | 0.976246 | 0        | 0        | -0.05752  | NA       | -0.03856 | NA       | -0.20565 | NA       |
| AT3G54630 | AT3G54630 | 3.566712 | 3.568492 | 1.287654 | 4.536571 | 3.974804 | 7.974726 | 2.66791  | 2.15778  | 5.857476 | 5.757214 | 5.321336 | 5.179533 | 0.593577  | 0.374129 | 0.191028 | 0.818148 | 0.640032 | NA       |
| AT3G54640 | TA5A1     | 437.5167 | 392.5341 | 406.8988 | 1099.5   | 1185.816 | 1114.468 | 1661.219 | 1450.028 | 1808.008 | 430.8315 | 541.4459 | 434.0448 | 1.436095  | 6.31E-28 | 1.963321 | 8.34E-52 | 0.17486  | 0.507381 |
| AT3G54650 | FBLL1     | 260.37   | 246.226  | 256.2432 | 181.4629 | 176.2163 | 215.3176 | 166.2998 | 200.6735 | 127.8882 | 266.7509 | 282.0308 | 233.079  | -0.41206  | 0.029074 | -0.61404 | 0.001185 | 0.031573 | 0.949258 |
| AT3G54660 | EMB2360   | 1974.769 | 1875.243 | 1864.523 | 1000.933 | 974.4894 | 1064.626 | 1277.04  | 1306.536 | 1146.113 | 1879.73  | 1905.038 | 1747.574 | -0.90631  | 1.1E-21  | -0.61199 | 3.24E-10 | -0.04719 | 0.838515 |
| AT3G54670 | TTN8      | 546.8958 | 438.9245 | 421.063  | 381.4844 | 431.2662 | 480.4773 | 485.5597 | 545.9183 | 501.7904 | 452.9008 | 542.7763 | 453.7271 | -0.12802  | 0.492696 | 0.118258 | 0.551309 | 0.036418 | 0.928043 |
| AT3G54680 | AT3G54680 | 72.52314 | 71.36984 | 61.80741 | 90.31901 | 113.9444 | 103.6714 | 102.2699 | 87.39009 | 113.2445 | 58.53167 | 49.22236 | 40.40035 | 0.558853  | 0.017044 | 0.54344  | 0.002825 | -0.46463 | 0.263611 |
| AT3G54690 | SETH3     | 457.728  | 499.5889 | 458.4049 | 266.4205 | 323.5586 | 296.6107 | 256.1194 | 240.5925 | 355.3535 | 512.392  | 609.293  | 458.9066 | -0.64745  | 0.00032  | -0.71376 | 9.42E-05 | 0.155179 | 0.659653 |
| AT3G54700 | PHT1.0    | 1.188904 | 1.784246 | 0        | 0.412416 | 1.987402 | 0.996841 | 0        | 1.07889  | 0        | 0        | 0        | 0        | -0.136839 | NA       | -0.30394 | NA       | -0.5037  | NA       |
| AT3G54710 | CDT1B     | 64.20081 | 55.31163 | 73.3963  | 68.04857 | 86.78321 | 77.75358 | 64.02985 | 46.39227 | 44.90732 | 79.64116 | 98.44471 | 59.04667 | 0.24341   | 0.416626 | -0.30064 | 0.351622 | 0.265005 | 0.594257 |
| AT3G54720 | AMP1      | 366.1824 | 372.9074 | 368.2691 | 130.7513 | 96.05775 | 106.662  | 113.8308 | 115.4412 | 92.74337 | 347.3519 | 301.9858 | 367.7468 | -1.68375  | 1.95E-26 | -1.7442  | 3.38E-26 | -0.11659 | 0.729971 |
| AT3G54730 | AT3G54730 | 9.511232 | 3.568492 | 0        | 0.412416 | 3.312336 | 0.996841 | 0        | 1.07889  | 0        | 0.995936 | 0        | 1.035907 | -0.70902  | 0.298863 | -1.22667 | 0.055939 | -1.04112 | NA       |
| AT3G54740 | AT3G54740 | 122.4571 | 149.8767 | 139.0667 | 156.7179 | 135.1433 | 147.5324 | 166.2998 | 187.7268 | 125.9357 | 159.2829 | 129.0424 | 130.5242 | 0.101736  | 0.683346 | 0.22159  | 0.358059 | 0.036386 | 0.947036 |
| AT3G54750 | AT3G54750 | 233.0252 | 146.3082 | 191.8605 | 136.922  | 149.0551 | 163.4819 | 130.7276 | 141.3346 | 85.90965 | 248.5197 | 203.5411 | 243.4348 | -0.35078  | 1.183051 | -0.66253 | 0.004157 | 0.268209 | 0.493509 |
| AT3G54760 | AT3G54760 | 838.1773 | 774.3628 | 674.7309 | 559.6479 | 545.2106 | 616.0476 | 638.5199 | 735.8029 | 565.2464 | 724.4494 | 802.1914 | 669.1956 | -0.40669  | 0.006536 | -0.23539 | 0.159405 | -0.05951 | 0.863358 |
| AT3G54770 | AT3G54770 | 1.188904 | 1.784246 | 0.91358  | 0        | 0        | 0        | 0        | 0        | 0.995936 | 5.321336 | 2.670183 | 0        | -1.61727  | 0.007623 | -1.48254 | 0.016034 | -0.3203  | NA       |
| AT3G54780 | AT3G54780 | 34.47821 | 26.76369 | 27.04074 | 32.99325 | 32.4609  | 41.86731 | 32.90423 | 26.97225 | 22.45366 | 23.98839 | 30.59768 | 25.89766 | 0.236812  | 0.524316 | -0.10019 | 0.827451 | -0.14537 | 0.850178 |
| AT3G54790 | PUB3      | 337.6487 | 319.38   | 291.0099 | 164.9662 | 163.6294 | 171.4566 | 197.4254 | 214.6991 | 171.8193 | 278.2653 | 276.7095 | 299.377  | -0.9124   | 6.46E-11 | -0.69058 | 2.31E-06 | -0.14719 | 0.594257 |
| AT3G54800 | AT3G54800 | 1.188904 | 0        | 0        | 0.412416 | 0        | 0        | 0        | 0        | 0        | 0        | 0        | 0        | -0.10956  | NA       | -0.19067 | NA       | -0.18704 | NA       |
| AT3G54802 | AT3G54802 | 0        | 0        | 0        | 0        | 0        | 0        | 0        | 0        | 0        | 0        | 0        | 0        | #N/A      | #N/A     | #N/A     | #N/A     | #N/A     | #N/A     |
| AT3G54804 | AT3G54804 | 0        | 0        | 0        | 0        | 0        | 0        | 0        | 0        | 0        | 0        | 0        | 0        | #N/A      | #N/A     | #N/A     | #N/A     | #N/A     | #N/A     |
| AT3G54810 | GAT8A     | 384.016  | 349.7122 | 309.037  | 507.2712 | 524.0116 | 651.9339 | 686.4523 | 849.0864 | 896.1938 | 270.588  | 312.6285 | 291.0897 | 0.672902  | 0.000038 | 1.198352 | 2.1E-14  | -0.25226 | 0.386985 |
| AT3G54820 | PIP2-5    | 93.92341 | 80.29107 | 83.69753 | 123.3123 | 114.6068 | 101.6778 | 100.4913 | 106.8101 | 111.292  | 87.31774 | 85.14137 | 104.6266 | 0.390754  | 0.063359 | 0.287363 | 0.225853 | 0.095739 | 0.843797 |
| AT3G54823 | AT3G54823 | 0        | 0        | 0        | 0.662467 | 0        | 0.889303 | 1.07889  | 0        | 0.995936 | 0        | 0        | 0        | 0.095148  | NA       | 0.335415 | NA       | 0.171604 | NA       |
| AT3G54826 | AT3G54826 | 146.2352 | 206.9725 | 171.258  | 275.0812 | 252.4    | 185.4124 | 197.4254 | 166.1491 | 245.0377 | 180.3927 | 252.7635 | 205.1095 | 0.443967  | 0.058712 | 0.216134 | 0.433008 | 0.276719 | 0.495317 |
| AT3G54830 | AT3G54830 | 127.2127 | 160.5821 | 169.9704 | 125.7868 | 121.2315 | 118.6241 | 168.9677 | 194.2002 | 114.2208 | 111.3061 | 134.3637 | 98.41112 | -0.30707  | 0.210476 | 0.061515 | 0.845138 | -0.39949 | 0.274581 |
| AT3G54840 | RABF1     | 423.2498 | 556.6848 | 566.5679 | 651.6166 | 673.2935 | 672.8675 | 610.6622 | 585.8372 | 614.0587 | 561.3283 | 517.4999 | 463.0502 | 0.342058  | 0.019425 | 0.228173 | 0.159702 | 0.000145 | 0.999644 |
| AT3G54850 | PUB1A     | 181.9023 | 210.541  | 157.0938 | 228.8906 | 185.4908 | 237.2481 | 244.5585 | 233.0402 | 197.2017 | 147.7685 | 111.7481 | 157.4573 | 0.246098  | 0.249246 | -0.27029 | 0.177842 | -0.37186 | 0.236803 |
| AT3G54860 | VP533     | 321.0041 | 306.8903 | 339.9407 | 308.9993 | 315.9969 | 341.9164 | 393.0721 | 367.9015 | 258.7055 | 325.8286 | 324.6015 | 350.1364 | -0.00618  | 0.979204 | 0.072475 | 0.753912 | 0.044907 | 0.916524 |
| AT3G54870 | MRH2      | 4.755616 | 3.568492 | 6.438272 | 7.42348  | 5.962205 | 4.984204 | 8.003731 | 8.63112  | 0.976246 | 5.757214 | 2.660668 | 12.43088 | 0.211626  | 0.775192 | 0.145486 |          |          |          |



|           |           |          |          |          |          |          |          |          |          |          |          |          |           |          |          |           |          |           |          |
|-----------|-----------|----------|----------|----------|----------|----------|----------|----------|----------|----------|----------|----------|-----------|----------|----------|-----------|----------|-----------|----------|
| AT3G55350 | AT3G55350 | 128.4016 | 108.839  | 63.09506 | 68.04857 | 66.90919 | 67.78517 | 60.47264 | 52.86561 | 63.45599 | 77.72239 | 86.47171 | 67.33392  | -0.5406  | 0.039083 | -0.72577  | 0.007125 | -0.36205  | 0.410466 |
| AT3G55360 | ECR       | 48.11464 | 451.4142 | 400.4605 | 268.895  | 326.5964 | 250.207  | 243.6692 | 247.0658 | 309.47   | 351.19   | 292.6735 | 449.5834  | -0.56683 | 0.002736 | -0.64624  | 0.000767 | -0.20347  | 0.560274 |
| AT3G55370 | DOF3.6    | 47.74506 | 32.11643 | 32.19136 | 33.40566 | 30.47349 | 25.91786 | 34.68284 | 34.52448 | 23.4299  | 33.58375 | 43.90102 | 37.29264  | -0.30833 | 0.381668 | -0.28393  | 0.466073 | -0.00505  | 0.959723 |
| AT3G55380 | UBC14     | 173.58   | 164.1506 | 163.5321 | 216.1058 | 236.5008 | 223.2923 | 187.643  | 147.8079 | 261.6339 | 177.5141 | 295.3341 | 200.9659  | 0.413474 | 0.097486 | 0.242743  | 0.395069 | 0.402637  | 0.289901 |
| AT3G55390 | AT3G55390 | 11.88904 | 16.05821 | 10.30123 | 20.62078 | 15.23675 | 18.93997 | 23.12189 | 21.5778  | 26.35864 | 12.47396 | 13.30334 | 12.43088  | 0.484653 | 0.276253 | 0.180160  | 0.06052  | 0.013103  | 0.991568 |
| AT3G55400 | OVA1      | 639.6303 | 745.8148 | 803.4963 | 582.7432 | 511.4247 | 607.076  | 702.5498 | 694.8051 | 500.8142 | 599.7098 | 679.8007 | 636.4066  | -0.35705 | 0.036571 | -0.20097  | 0.298164 | -0.18911  | 0.592512 |
| AT3G55410 | AT3G55410 | 1338.706 | 1122.291 | 994.6092 | 856.5871 | 908.2426 | 959.577  | 1205.896 | 1186.779 | 996.7472 | 1046.853 | 1081.562 | 1015.188  | -0.34061 | 0.001875 | -0.02823  | 0.889016 | -0.13583  | 0.612325 |
| AT3G55420 | AT3G55420 | 197.3581 | 162.3664 | 149.3679 | 91.96867 | 75.52127 | 66.78833 | 88.93036 | 75.18117 | 145.4607 | 202.462  | 266.0668 | 186.4362  | -1.04974 | 0.008169 | -0.75829  | 0.010278 | -0.341284 | 0.941006 |
| AT3G55430 | AT3G55430 | 366.1824 | 280.1266 | 285.8593 | 296.1144 | 261.0121 | 352.8816 | 308.5883 | 367.9015 | 365.116  | 242.7625 | 176.9344 | 252.7612  | -0.04244 | 0.867935 | 0.151224  | 0.525056 | -0.45745  | 0.102785 |
| AT3G55440 | CTIMC     | 3356.276 | 3532.807 | 3441.9   | 3351.701 | 3265.964 | 3374.306 | 2888.458 | 3298.167 | 4568.831 | 3968.639 | 3537.358 | 3291.075  | -0.04718 | 0.828579 | 0.057112  | 0.802077 | 0.062759  | 0.869575 |
| AT3G55450 | PBL1      | 118.8904 | 155.2294 | 112.0259 | 360.0388 | 337.8583 | 329.9543 | 465.995  | 479.0271 | 499.8379 | 98.83217 | 91.79304 | 152.2783  | 1.391492 | 2.37E-14 | 1.870764  | 2.34E-25 | -0.1471   | 0.730823 |
| AT3G55460 | SCL30     | 506.4731 | 622.7019 | 534.3766 | 750.1839 | 736.0011 | 655.9212 | 588.7189 | 673.2273 | 870.8114 | 574.7618 | 432.3585 | 514.8455  | 0.361659 | 0.051064 | 0.353576  | 0.067546 | -0.12013  | 0.74664  |
| AT3G55470 | AT3G55470 | 58.25629 | 74.93833 | 69.53333 | 273.4315 | 262.9995 | 252.2007 | 232.1082 | 181.2535 | 218.6791 | 96.9131  | 103.766  | 50.75942  | 1.859276 | 1.64E-17 | 1.58392   | 3.78E-12 | 0.292168  | 0.52541  |
| AT3G55480 | AP3BA     | 590.8853 | 522.7841 | 526.6506 | 386.8458 | 421.3292 | 458.5468 | 457.102  | 449.8971 | 260.6577 | 570.9237 | 540.1156 | 501.3788  | -0.3666  | 0.079523 | -0.47847  | 0.022749 | -0.02492  | 0.963016 |
| AT3G55485 | AT3G55485 | 1.188904 | 1.784246 | 1.287654 | 0.124216 | 0.662467 | 0        | 0        | 0        | 1.952492 | 0        | 0        | 0         | -0.48138 | NA       | -0.30976  | NA       | -0.69599  | NA       |
| AT3G55490 | AT3G55490 | 48.74506 | 35.68492 | 93.99877 | 108.0529 | 114.6068 | 85.72831 | 82.70522 | 78.75897 | 73.21845 | 56.6126  | 61.19536 | 64.2262   | 0.735001 | 0.009391 | 0.351417  | 0.291923 | 0.003546  | 0.996482 |
| AT3G55500 | EXPA16    | 58.25629 | 69.5856  | 73.3963  | 24.33252 | 18.54908 | 14.95261 | 29.70701 | 20.49891 | 35.14486 | 76.76285 | 62.5257  | 71.51755  | -1.6387  | 2.53E-09 | -1.15955  | 5.72E-05 | 0.077929  | 0.905042 |
| AT3G55510 | RBL       | 160.502  | 164.1506 | 186.7099 | 198.3719 | 201.3901 | 229.2734 | 183.1965 | 171.5435 | 106.4108 | 138.1731 | 129.0424 | 160.5655  | 0.28587  | 0.214153 | -0.14506  | 0.59564  | -0.24768  | 0.52859  |
| AT3G55512 | MIR172D   | 0        | 0        | 0        | 0        | 0        | 0        | 0        | 0        | 0        | 0        | 0        | 0         | #N/A     | #N/A     | #N/A      | #N/A     | #N/A      | #N/A     |
| AT3G55515 | DVL8      | 1.188904 | 0        | 1.287654 | 2.062078 | 3.974804 | 0.996841 | 2.66791  | 0        | 3.904984 | 3.838143 | 0        | 1.035907  | 0.520872 | 0.467785 | 0.454614  | 0.549619 | 0.286526  | NA       |
| AT3G55520 | FKBP2D1   | 231.8363 | 224.815  | 251.0926 | 423.1384 | 398.8053 | 290.0807 | 345.0498 | 286.9847 | 332.8999 | 300.3347 | 343.2262 | 271.4075  | 0.643217 | 0.00033  | 0.436148  | 0.024978 | 0.35675   | 0.21182  |
| AT3G55530 | SODIR1    | 104.6235 | 99.91778 | 105.5877 | 110.5274 | 127.8562 | 96.69356 | 112.0522 | 133.7824 | 98.60085 | 84.43914 | 82.48071 | 90.102387 | 0.113651 | 0.650413 | 0.141599  | 0.591338 | -0.26339  | 0.491006 |
| AT3G55540 | AT3G55540 | 0        | 0        | 0        | 0        | 0        | 0        | 0        | 0        | 0        | 0        | 1.330334 | 1.035907  | 0        | NA       | 0         | NA       | 0.375122  | NA       |
| AT3G55550 | LECRK54   | 0        | 0        | 0        | 0        | 0        | 0        | 0.889303 | 0        | 0        | 0        | 0        | 0         | 0        | NA       | 0.160764  | 0        | 0         | NA       |
| AT3G55560 | AHL15     | 61.82301 | 49.95889 | 63.09506 | 111.7646 | 83.47088 | 131.583  | 129.8383 | 130.5457 | 123.007  | 50.85539 | 50.55269 | 54.90305  | 0.845906 | 0.000271 | 1.077913  | 3.15E-06 | -0.16743  | 0.75506  |
| AT3G55566 | AT3G55566 | 0        | 0        | 0        | 0        | 0        | 0        | 0        | 0        | 0        | 0        | 0        | 0         | #N/A     | #N/A     | #N/A      | #N/A     | #N/A      | #N/A     |
| AT3G55570 | AT3G55570 | 0        | 0        | 0        | 0.412416 | 0        | 0        | 0        | 0.889303 | 0        | 0        | 1.919071 | 0         | 0.053621 | NA       | 0.138662  | NA       | 0.299732  | NA       |
| AT3G55573 | AT3G55573 | 0        | 0        | 0        | 0        | 0        | 0        | 0        | 0        | 0        | 0        | 0        | 0         | #N/A     | #N/A     | #N/A      | #N/A     | #N/A      | #N/A     |
| AT3G55580 | AT3G55580 | 14.26685 | 10.70548 | 9.01358  | 8.248311 | 3.974804 | 11.96209 | 5.335821 | 11.86779 | 6.833722 | 17.27164 | 25.27635 | 17.61041  | -0.45254 | 0.41078  | -0.4283   | 0.47697  | 0.68924   | NA       |
| AT3G55590 | AT3G55590 | 0        | 0        | 0        | 0.412416 | 0        | 0        | 0        | 0        | 0        | 0        | 0        | 0         | 0.095918 | NA       | 0         | NA       | 0         | NA       |
| AT3G55600 | AT3G55600 | 79.65656 | 66.0171  | 75.97161 | 108.8777 | 105.3323 | 78.75042 | 113.8308 | 65.81229 | 127.8882 | 85.39867 | 109.0874 | 71.47757  | 0.384922 | 0.194357 | 0.445654  | 0.147204 | 0.233652  | 0.666516 |
| AT3G55605 | AT3G55605 | 73.71204 | 85.64381 | 97.86173 | 169.5028 | 172.904  | 154.5103 | 131.6169 | 111.1257 | 125.9357 | 117.0633 | 131.7031 | 117.0575  | 0.594394 | 3.47E-07 | -1.509558 | 0.01409  | 0.490808  | 0.083585 |
| AT3G55610 | P5CSB     | 1173.448 | 1184.739 | 1103.52  | 1142.804 | 1151.368 | 1263.994 | 1269.036 | 1439.239 | 1057.274 | 1042.056 | 999.0808 | 993.4344  | 0.038407 | 0.825997 | 0.119928  | 0.459951 | -0.18707  | 0.410204 |
| AT3G55620 | EIF6-2    | 580.1851 | 549.5478 | 600.0469 | 561.71   | 652.5303 | 624.0223 | 610.9515 | 661.3595 | 561.3414 | 575.7214 | 582.6863 | 510.7019  | 0.080258 | 0.59501  | 0.008681  | 0.629753 | -0.05375  | 0.859259 |
| AT3G55630 | FGS3      | 447.0279 | 419.2978 | 482.8704 | 596.3529 | 674.3917 | 587.1392 | 1446.897 | 1288.195 | 1212.498 | 603.5479 | 550.7583 | 643.298   | 0.452911 | 0.000716 | 1.528718  | 1.26E-35 | 0.407267  | 0.022475 |
| AT3G55640 | AT3G55640 | 70.27876 | 80.29107 | 70.82099 | 113.0019 | 104.6698 | 105.6651 | 103.1592 | 101.4157 | 101.5296 | 73.88424 | 87.80204 | 80.80071  | 0.497578 | 0.014472 | 0.415098  | 0.062594 | 0.080281  | 0.817867 |
| AT3G55646 | AT3G55646 | 70.14333 | 66.0171  | 92.71111 | 33.81808 | 39.08557 | 37.87995 | 37.35075 | 30.20892 | 23.4299  | 54.69353 | 93.12338 | 72.51346  | -1.20563 | 0.000223 | -1.25252  | 1.23E-05 | -0.0702   | 0.918298 |
| AT3G55650 | AT3G55650 | 1.188904 | 1.784246 | 0        | 0        | 0.662467 | 0        | 0        | 2.15778  | 0.976246 | 0        | 1.330334 | 2.071813  | -0.43167 | 0.500674 | 0.042567  | 0.956731 | 0.08158   | NA       |
| AT3G55660 | ROPGEF6   | 73.71204 | 69.8586  | 96.57408 | 132.7978 | 115.2693 | 132.5798 | 121.8346 | 107.889  | 102.5058 | 79.64146 | 77.15937 | 93.23159  | 0.638506 | 0.002104 | 0.448096  | 0.05192  | 0.051142  | 0.927039 |
| AT3G55665 | AT3G55665 | 0        | 0        | 0        | 0        | 0        | 0        | 0        | 0        | 0        | 0        | 0        | 0         | #N/A     | #N/A     | #N/A      | #N/A     | #N/A      | #N/A     |
| AT3G55670 | AT3G55670 | 1.188904 | 5.352738 | 1.287654 | 1.237247 | 0        | 3.987363 | 1.778607 | 1.07889  | 0.976246 | 2.878607 | 2.660668 | 0         | -0.26718 | 0.733749 | -0.37671  | 0.633096 | -0.1772   | NA       |
| AT3G55672 | AT3G55672 | 0        | 0        | 0        | 0        | 0        | 0        | 0        | 0        | 0        | 0        | 0        | 0         | #N/A     | #N/A     | #N/A      | #N/A     | #N/A      | #N/A     |
| AT3G55677 | AT3G55677 | 0        | 0        | 0        | 0        | 0        | 0        | 0        | 0        | 0        | 0        | 0        | 0         | #N/A     | #N/A     | #N/A      | #N/A     | #N/A      | #N/A     |
| AT3G55680 | AT3G55680 | 0        | 0        | 0        | 0        | 0        | 0        | 0        | 0        | 0        | 0        | 1.330334 | 0         | 0        | NA       | 0         | NA       | 0.172362  | NA       |
| AT3G55690 | AT3G55690 | 36.85602 | 33.90067 | 33.47901 | 36.29257 | 28.48609 | 40.87047 | 35.57214 | 42.07671 | 27.33489 | 26.867   | 29.26735 | 19.68222  | 0.00836  | 0.984842 | 0.003924  | 0.993193 | -0.43493  | 0.45208  |
| AT3G55700 | UG776F1   | 2.377808 | 5.352738 | 6.438272 | 87.01969 | 72.20893 | 89.71567 | 42.68657 | 57.18117 | 79.07593 | 3.838143 | 6.51637  | 8.287252  | 3.499187 | 8.57E-19 | 3.034212  | 5.67E-14 | 0.200532  | 0.860356 |
| AT3G55710 | UG776F2   | 107.0014 | 103.4863 | 75.97161 | 27.63184 | 18.54908 | 17.94313 | 34.68284 | 37.76115 | 49.78855 | 83.4796  | 90.46271 | 70.44164  | -1.99419 | 1.52E-14 | -1.16786  | 1.09E-05 | -0.219    | 0.662652 |
| AT3G55720 | AT3G55720 | 11.88904 | 1.784246 | 14.1642  | 5.361402 | 6.246763 | 2.990522 | 3.557214 | 5.39445  | 1.952492 | 9.593556 | 6.65167  | 10.35907  | -0.69104 | 0.247538 | -0.1044   | 0.099018 | -0.08119  | NA       |
| AT3G55730 | MYB109    | 58.25629 | 44.60615 | 59.2321  | 47.42779 | 50.34751 | 55.82308 | 56.02612 | 38.84004 | 48.8123  | 27.82653 | 43.90102 | 40.40035  | -0.09726 | 0.778907 | -0.17162  | 0.63005  | -0.53082  | 0.23599  |
| AT3G55734 | MIR393B   | 1.188904 | 0        | 0        | 0        | 0        | 0        | 0        | 0        | 0        | 0        | 0        | 0         | -0.2184  | NA       | -0.20558  | NA       | -0.19918  | NA       |
| AT3G55735 | AT3G55735 | 0        | 0        | 0        | 0        | 0        | 0        | 0        | 0        | 0        | 0        | 1.330334 | 0         | 0        | NA       | 0         | NA       | 0.172362  | NA       |
| AT3G55740 | PROT2     | 130.7794 | 189.1301 | 173.8333 | 155.4807 | 139.7806 | 139.5577 | 218.7687 | 145.6501 | 166.9381 | 151.6066 | 133.0334 | 160.5655  | -0.16459 | 0.500008 | 0.116885  | 0.665579 | -0.13169  | 0.767369 |
| AT3G55750 | RPL35AD   | 482.695  | 438.9245 | 533.0889 | 784.4144 | 690.9534 | 582.155  | 505.1244 | 468.2382 | 776.1156 | 640.5771 | 348.5475 | 625.6875  | 0.481786 | 0.052774 | 0.254857  | 0.3718   | -0.01836  | 0.979097 |
| AT3G55760 | AT3G55760 | 306.7372 | 255.1472 | 235.6407 | 150.1193 | 125.8688 | 149.5261 | 166.2998 | 194.2002 | 172.7955 | 232.2076 | 186.2468 | 235.1508  | -0.      |          |           |          |           |          |

|           |           |          |          |          |          |          |          |          |          |          |          |          |          |           |          |          |          |           |          |
|-----------|-----------|----------|----------|----------|----------|----------|----------|----------|----------|----------|----------|----------|----------|-----------|----------|----------|----------|-----------|----------|
| AT3G56260 | AT3G56260 | 35.66712 | 35.68492 | 33.47901 | 44.9533  | 47.03518 | 36.88311 | 28.45771 | 23.73558 | 33.19236 | 44.13864 | 45.23135 | 32.1131  | 0.297577  | 0.370177 | -0.27168 | 0.477811 | 0.19593   | 0.757425 |
| AT3G56270 | AT3G56270 | 111.757  | 114.1917 | 130.0531 | 87.4321  | 94.07035 | 76.75674 | 63.14055 | 66.89118 | 65.40848 | 136.2541 | 168.9524 | 114.9856 | -0.44319  | 0.039272 | -0.83928 | 0.000115 | 0.223943  | 0.557232 |
| AT3G56275 | AT3G56275 | 8.322328 | 1.784246 | 6.438272 | 0.824831 | 0.662467 | 0.996841 | 1.778607 | 2.15778  | 3.904984 | 3.838143 | 5.321336 | 6.215439 | -1.56476  | 0.011441 | -0.73625 | 0.296572 | -0.108    | NA       |
| AT3G56277 | AT3G56277 | 0        | 0        | 0        | 0        | 0        | 0        | 0        | 0        | 0        | 0        | 0        | 0        | #N/A      | #N/A     | #N/A     | #N/A     | #N/A      | #N/A     |
| AT3G56280 | AT3G56280 | 0        | 0        | 0        | 0        | 0        | 0        | 0        | 0        | 0        | 0        | 0        | 0        | #N/A      | #N/A     | #N/A     | #N/A     | #N/A      | #N/A     |
| AT3G56290 | AT3G56290 | 167.6355 | 157.0137 | 168.6827 | 204.5581 | 183.5034 | 153.5135 | 151.1816 | 99.25787 | 187.4392 | 217.8146 | 196.8894 | 255.8689 | 0.135313  | 0.621975 | -0.16475 | 0.567943 | 0.428377  | 0.220988 |
| AT3G56300 | AT3G56300 | 57.06739 | 46.3904  | 46.35556 | 26.3946  | 21.86142 | 33.89259 | 22.23259 | 14.02557 | 15.61994 | 44.13864 | 33.25835 | 50.75942 | -0.83968  | 0.00636  | -1.4014  | 1.73E-05 | -0.20529  | 0.745574 |
| AT3G56310 | AGAL3     | 898.8114 | 688.7119 | 809.9346 | 974.538  | 1060.61  | 1065.623 | 771.9154 | 796.2208 | 918.6475 | 644.8079 | 611.9536 | 739.6373 | 0.361576  | 0.01233  | 0.40814  | 0.80873  | -0.2631   | 0.245429 |
| AT3G56320 | AT3G56320 | 59.4452  | 57.09587 | 65.67037 | 105.9908 | 83.47088 | 89.71567 | 96.04478 | 78.75897 | 73.21845 | 73.88424 | 67.84703 | 84.94434 | 0.598063  | 0.010997 | 0.425388 | 0.106276 | 0.301211  | 0.482938 |
| AT3G56330 | AT3G56330 | 71.33424 | 94.56504 | 106.8753 | 88.66935 | 113.2819 | 59.81045 | 74.70149 | 74.36452 | 72.2422  | 131.4564 | 110.4177 | 68.36993 | -0.04139  | 0.916653 | -0.28639 | 0.417604 | 0.179621  | 0.768141 |
| AT3G56340 | RP526C    | 1270.938 | 1498.767 | 1438.31  | 1756.478 | 1743.614 | 1575.008 | 1044.932 | 1265.538 | 1662.547 | 1636.968 | 1475.34  | 200.7787 | 0.266587  | 0.145193 | -0.0808  | 0.722347 | 0.102299  | 0.777285 |
| AT3G56350 | MSD2      | 0        | 0        | 0        | 0        | 1.324935 | 0        | 0        | 1.07889  | 0        | 0        | 0        | 0        | 0.195296  | NA       | 0.144258 | NA       | 0         | NA       |
| AT3G56360 | AT3G56360 | 620.6079 | 606.6437 | 548.5407 | 477.9897 | 400.7927 | 483.4678 | 437.5373 | 543.7605 | 856.1677 | 640.0103 | 502.8662 | 514.8455 | -0.36996  | 0.120097 | -0.07582 | 0.880882 | -0.09468  | 0.853499 |
| AT3G56370 | AT3G56370 | 624.1746 | 497.8046 | 481.5827 | 222.7044 | 222.589  | 272.1375 | 257.898  | 265.4069 | 222.5841 | 30.6232  | 465.6169 | 516.9174 | -1.15192  | 1.16E-14 | -1.08854 | 9.43E-13 | -0.08337  | 0.807804 |
| AT3G56380 | ARR17     | 0        | 0        | 0        | 0        | 0        | 0        | 0        | 0        | 0        | 0        | 0        | 0        | 0.1919071 | 1.330334 | 0        | NA       | 0.510836  | NA       |
| AT3G56390 | AT3G56390 | 699.0575 | 831.4587 | 763.579  | 3442.845 | 3196.405 | 3385.271 | 1649.658 | 1667.964 | 1708.43  | 431.791  | 444.3315 | 501.3788 | 0.095918  | NA       | 0        | NA       | 0         | NA       |
| AT3G56400 | WRKY70    | 5.94452  | 0        | 3.862963 | 2.474493 | 1.987402 | 2.990522 | 0.889303 | 2.15778  | 2.928738 | 4.797678 | 5.321336 | 8.287252 | 2.115321  | 2.86E-98 | 1.126006 | 0.12E-27 | -0.72396  | 4.54E-09 |
| AT3G56408 | AT3G56408 | 5.94452  | 0        | 3.862963 | 2.474493 | 1.987402 | 2.990522 | 0.889303 | 2.15778  | 2.928738 | 4.797678 | 5.321336 | 8.287252 | -0.33133  | 0.658708 | -0.47197 | 0.537008 | 0.55611   | NA       |
| AT3G56410 | AT3G56410 | 240.1586 | 190.9143 | 160.9568 | 174.0394 | 188.1407 | 220.3018 | 273.0162 | 256.7758 | 233.3228 | 127.6182 | 170.2827 | 147.0987 | -0.03483  | 0.895104 | 0.35457  | 0.995801 | -0.41127  | 0.175093 |
| AT3G56420 | AT3G56420 | 0        | 0        | 0        | 0        | 0.662467 | 0        | 0        | 0        | 0        | 0        | 0        | 0        | 0.128567  | NA       | 0        | NA       | 0         | NA       |
| AT3G56430 | AT3G56430 | 114.1348 | 105.2705 | 132.6284 | 87.84452 | 125.2063 | 103.6714 | 125.3918 | 105.7312 | 143.5082 | 111.3061 | 122.3907 | 114.9856 | -0.16171  | 0.519931 | 0.083673 | 0.774566 | -0.02188  | 0.917473 |
| AT3G56440 | ATG18D    | 48.74506 | 58.88012 | 51.50617 | 73.82239 | 70.22153 | 71.77254 | 57.18117 | 66.38473 | 53.734   | 50.55269 | 47.6517  | 0        | 0.438974  | 0.075036 | 0.227096 | 0.491342 | -0.05139  | 0.936751 |
| AT3G56450 | ASNAP1    | 86.78999 | 99.91778 | 93.99877 | 113.8267 | 86.78321 | 106.662  | 104.0485 | 108.9679 | 85.90965 | 71.00564 | 57.20436 | 83.90843 | 0.136555  | 0.607456 | 0.093115 | 0.759144 | -0.37337  | 0.323583 |
| AT3G56460 | AT3G56460 | 613.4744 | 679.7977 | 678.5938 | 784.4144 | 801.5854 | 772.5516 | 799.4838 | 869.5853 | 880.5739 | 625.6172 | 546.7673 | 636.0466 | 0.258819  | 0.029162 | 0.369004 | 0.001637 | -0.1188   | 0.590987 |
| AT3G56470 | AT3G56470 | 33.28931 | 53.52738 | 37.34198 | 38.76706 | 41.73544 | 32.89575 | 33.79353 | 31.28781 | 32.21612 | 25.90746 | 22.61568 | 29.00538 | -0.08019  | 0.834239 | -0.29931 | 0.416182 | -0.59573  | 0.224212 |
| AT3G56480 | SCAB3     | 324.5708 | 260.4999 | 296.1605 | 333.2318 | 294.1355 | 360.8564 | 275.6841 | 290.2214 | 215.7504 | 280.1844 | 280.7005 | 280.7307 | 0.153944  | 0.413122 | -0.17669 | 0.374745 | -0.07126  | 0.915282 |
| AT3G56490 | HIT3      | 164.0687 | 160.5821 | 176.4086 | 220.2299 | 237.8258 | 167.4693 | 146.6531 | 128.3879 | 276.2704 | 144.8899 | 125.0514 | 204.0736 | 0.306308  | 0.33049  | 0.130349 | 0.728446 | -0.07369  | 0.856535 |
| AT3G56500 | AT3G56500 | 0        | 0        | 0        | 2.062078 | 0.662467 | 3.987363 | 0.889303 | 0        | 1.952492 | 0.959536 | 1.330334 | 1.035907 | 0.976875  | 0.113863 | 0.450177 | 0.519766 | 0.512017  | NA       |
| AT3G56510 | AT3G56510 | 167.6355 | 221.2465 | 166.1074 | 231.3651 | 232.526  | 194.384  | 201.8719 | 179.0957 | 211.8454 | 162.1615 | 109.0874 | 193.7145 | 0.25279   | 0.282683 | 0.102256 | 0.719564 | -0.22927  | 0.566766 |
| AT3G56520 | AT3G56520 | 0        | 0        | 0        | 0        | 0        | 0        | 0        | 0.976246 | 0        | 0        | 0        | 0        | 0         | NA       | 0.16673  | NA       | 0         | NA       |
| AT3G56530 | anac064   | 0        | 0        | 0        | 0        | 0        | 0        | 0.889303 | 0        | 0        | 0.959536 | 1.330334 | 0        | 0         | NA       | 0.162611 | NA       | 0.377183  | NA       |
| AT3G56540 | SCPL53    | 0        | 0        | 1.287654 | 1.649662 | 2.649869 | 0        | 0        | 0        | 0        | 1.330334 | 1.035907 | 0        | 0.499274  | NA       | -0.12736 | NA       | 0.13722   | NA       |
| AT3G56550 | PCMP-H80  | 16.64466 | 3.568492 | 10.30123 | 7.835896 | 8.612075 | 4.984204 | 10.67164 | 15.10446 | 10.73871 | 9.595356 | 11.97301 | 6.215439 | -0.44174  | 0.439805 | 0.156321 | 0.817999 | -0.17696  | NA       |
| AT3G56560 | anac065   | 0        | 0        | 0        | 0        | 0        | 0        | 0        | 0        | 0        | 0        | 0        | 0        | #N/A      | #N/A     | #N/A     | #N/A     | #N/A      | #N/A     |
| AT3G56570 | AT3G56570 | 20.21137 | 19.62671 | 23.17778 | 17.73387 | 18.54908 | 17.94313 | 29.34701 | 21.5778  | 13.66744 | 19.19071 | 22.61568 | 27.96948 | -0.20319  | 0.661345 | 0.035033 | 0.9495   | 0.127011  | 0.888185 |
| AT3G56580 | AT3G56580 | 257.9922 | 265.8527 | 233.0654 | 256.5225 | 256.3748 | 259.1786 | 209.8756 | 209.3046 | 167.9143 | 238.9244 | 215.5141 | 250.6894 | 0.030983  | 0.878403 | -0.35784 | 0.301707 | -0.09413  | 0.775458 |
| AT3G56590 | AT3G56590 | 468.4282 | 344.3595 | 315.4753 | 195.485  | 210.6646 | 244.226  | 175.1928 | 193.1213 | 143.5082 | 283.066  | 278.0398 | 245.5098 | -0.78608  | 2.14E-05 | -1.11654 | 1.82E-09 | -0.47669  | 0.676243 |
| AT3G56600 | TS19_250  | 1.188904 | 1.784246 | 2.575309 | 0.824831 | 3.312336 | 1.993682 | 3.57214  | 0        | 0.976246 | 1.919071 | 2.660668 | 1.035907 | 0.053342  | 0.951132 | -0.10082 | 0.908626 | -0.00124  | NA       |
| AT3G56610 | AT3G56610 | 0        | 0        | 0        | 0        | 0        | 0        | 0        | 0        | 0        | 0        | 0        | 0        | #N/A      | #N/A     | #N/A     | #N/A     | #N/A      | #N/A     |
| AT3G56620 | AT3G56620 | 34.47821 | 24.97944 | 23.17778 | 42.06639 | 35.77323 | 35.88627 | 50.6903  | 53.9445  | 34.16861 | 26.867   | 49.22236 | 40.40035 | -0.417864 | 0.246086 | 0.676011 | 0.056609 | -0.021983 | 0.475332 |
| AT3G56630 | CYP94D2   | 180.7134 | 169.5034 | 220.1889 | 170.3276 | 183.5034 | 153.5135 | 224.1045 | 228.7247 | 266.5152 | 171.7569 | 196.8894 | 184.3914 | -0.16679  | 0.395158 | 0.322754 | 0.803249 | -0.45233  | 0.898488 |
| AT3G56640 | SEC15A    | 130.7794 | 155.2294 | 110.7383 | 104.3411 | 105.9948 | 127.5956 | 109.3843 | 118.6779 | 81.02842 | 131.4564 | 121.0604 | 98.41112 | -0.22403  | 0.363483 | -0.3402  | 0.175413 | -0.1615   | 0.719193 |
| AT3G56650 | BDP6      | 622.9857 | 811.8319 | 777.7432 | 561.2976 | 618.7444 | 495.4299 | 372.7861 | 735.8029 | 813.2126 | 795.455  | 780.906  | 753.104  | -0.38976  | 0.006675 | 0.047358 | 0.810406 | 0.076785  | 0.804314 |
| AT3G56660 | PI149     | 0        | 3.568492 | 2.575309 | 1.649662 | 2.649869 | 0.996841 | 0.889303 | 2.15778  | 0.976246 | 1.919071 | 0        | 0        | -0.00595  | 0.994887 | -0.21418 | 0.790775 | -0.49133  | NA       |
| AT3G56670 | AT3G56670 | 0        | 0        | 0        | 0        | 0        | 0        | 1.07889  | 0        | 0        | 0        | 1.330334 | 0        | 0         | NA       | 0.160793 | NA       | 0.184979  | NA       |
| AT3G56680 | AT3G56680 | 1097.358 | 1263.246 | 1180.779 | 1153.114 | 1000.326 | 1112.474 | 1373.974 | 1354.007 | 1036.773 | 1132.252 | 1247.853 | 1101.169 | -0.11363  | 0.500746 | 0.088455 | 0.631926 | -0.02382  | 0.950436 |
| AT3G56690 | CIP111    | 224.7028 | 240.8732 | 197.0111 | 170.74   | 151.705  | 184.4155 | 200.0933 | 207.1469 | 137.6507 | 162.1615 | 162.3007 | 158.4937 | -0.37689  | 0.0546   | -0.27189 | 0.211001 | -0.44122  | 0.115284 |
| AT3G56700 | FAR6      | 0        | 0        | 0        | 0.412416 | 0        | 0.996841 | 0.889303 | 0        | 0        | 0.959536 | 1.330334 | 0        | 0.235925  | NA       | 0.157418 | NA       | 0.387101  | NA       |
| AT3G56705 | U2.6      | 0        | 0        | 0        | 0        | 0        | 0        | 0        | 0        | 0.976246 | 0        | 0        | 0        | 0         | NA       | 0.16673  | NA       | 0         | NA       |
| AT3G56710 | SIB1      | 90.3567  | 121.3287 | 105.5877 | 61.40868 | 647.2305 | 606.0792 | 449.0983 | 376.5326 | 602.3438 | 51.81492 | 63.85603 | 58.01077 | 2.499625  | 1.15E-39 | 2.120336 | 2.68E-28 | -0.82393  | 0.004541 |
| AT3G56720 | AT3G56720 | 343.5932 | 460.3355 | 388.8716 | 520.056  | 488.2384 | 480.4773 | 475.7774 | 551.3128 | 505.579  | 437.5482 | 476.2596 | 429.9012 | 0.325572  | 0.026727 | 0.405969 | 0.006098 | 0.175744  | 0.498675 |
| AT3G56730 | AT3G56730 | 9.511232 | 10.70548 | 3.862963 | 3.71174  | 1.324935 | 2.990522 | 2.66791  | 0        | 8.786214 | 7.676285 | 3.991002 | 10.35907 | -1.00079  | 0.112711 | -0.67915 | 0.332425 | -0.0491   | NA       |
| AT3G56740 | AT3G56740 | 97.49012 | 85.64381 | 83.69753 | 146.8199 | 116.5942 | 138.5609 | 134.2848 | 96.0212  | 104.4563 | 77.72239 | 77.15937 | 71.47755 | 0.573152  | 0.007349 | 0.317586 | 0.200503 | -0.23449  | 0.578914 |
| AT3G56750 | AT3G56750 | 326.9486 | 355.065  |          |          |          |          |          |          |          |          |          |          |           |          |          |          |           |          |

|           |           |          |          |          |          |          |           |          |          |          |          |          |          |          |           |          |          |          |          |
|-----------|-----------|----------|----------|----------|----------|----------|-----------|----------|----------|----------|----------|----------|----------|----------|-----------|----------|----------|----------|----------|
| AT3G57220 | AT3G57220 | 219.9472 | 194.4828 | 197.0111 | 174.8642 | 194.1029 | 185.4124  | 183.1965 | 183.4113 | 148.3894 | 181.3522 | 145.0064 | 178.1759 | -0.14494 | 0.458698  | -0.24669 | 0.20834  | -0.2685  | 0.345352 |
| AT3G57230 | AGL16     | 185.469  | 224.815  | 177.6963 | 366.6374 | 316.6594 | 273.1344  | 236.5547 | 254.618  | 284.0876 | 166.9592 | 353.8688 | 198.8941 | 0.680209 | 0.006989  | 0.38529  | 0.17551  | 0.274714 | 0.553115 |
| AT3G57240 | BG3       | 29.7226  | 80.29107 | 46.35556 | 225.1789 | 197.4152 | 158.4977  | 8.893035 | 20.49891 | 17.57243 | 3.838143 | 1.330334 | 2.071813 | 1.839035 | 3.45E-09  | -1.5407  | 2.67E-05 | -3.21971 | 1.66E-12 |
| AT3G57250 | AT3G57250 | 0        | 0        | 0        | 0        | 0        | 0         | 0        | 0        | 0.976246 | 0        | 0        | 0        | 0        | NA        | 0.16673  | NA       | 0        | 0        |
| AT3G57260 | BG2       | 495.7729 | 827.8902 | 582.0198 | 7265.113 | 5774.065 | 5647.103  | 4926.714 | 5277.93  | 5986.34  | 140.0922 | 158.3097 | 158.4937 | 3.222508 | 6.03E-78  | 3.019829 | 1.51E-68 | -1.98693 | 1.69E-24 |
| AT3G57270 | BG1       | 0        | 1.784246 | 0        | 13.60971 | 7.949607 | 10.96525  | 1.778607 | 3.23667  | 8.86214  | 0        | 0        | 0        | 1.244358 | 0.001612  | 2.244358 | 0.061132 | -0.34128 | NA       |
| AT3G57280 | FAX1      | 107.0014 | 133.8185 | 110.7383 | 217.7554 | 246.4378 | 222.9545  | 249.005  | 217.9358 | 278.301  | 103.6298 | 105.0964 | 128.4524 | 0.955293 | 5.02E-08  | 1.072947 | 1.14E-09 | -0.04576 | 0.920793 |
| AT3G57290 | EIF3E     | 888.1112 | 913.5334 | 945.1383 | 920.0991 | 946.0033 | 942.0145  | 832.3881 | 822.1141 | 873.7402 | 776.2643 | 686.4523 | 921.9568 | 0.031344 | 8.851001  | -0.11814 | 0.446767 | -0.19931 | 0.340957 |
| AT3G57300 | INO80     | 1027.213 | 904.6127 | 884.6185 | 675.1243 | 578.9964 | 804.4505  | 886.6356 | 894.3998 | 441.2632 | 1037.258 | 1004.402 | 875.341  | -0.43713 | 0.077877  | -0.32959 | 0.220935 | 0.048366 | 0.935837 |
| AT3G57310 | AT3G57310 | 0        | 0        | 0        | 0        | 0.662467 | 0         | 0        | 0        | 0        | 0        | 0        | 0        | 0        | NA        | 0        | 0        | 0        | 0        |
| AT3G57320 | AT3G57320 | 115.3237 | 67.80135 | 108.163  | 89.9066  | 88.10815 | 80.7441   | 90.70896 | 59.33895 | 164.0093 | 153.5257 | 207.5321 | 126.3806 | -0.16812 | 0.672877  | 0.09182  | 0.838161 | 0.677822 | 0.153196 |
| AT3G57330 | ACA11     | 833.4217 | 847.5169 | 634.8136 | 1089.602 | 1112.945 | 1333.773  | 1124.08  | 1317.325 | 1146.113 | 507.5943 | 582.6863 | 530.3841 | 0.601233 | 6.18E-05  | 0.622985 | 3.94E-05 | -0.50631 | 0.010938 |
| AT3G57340 | AT3G57340 | 386.3938 | 476.3937 | 412.0094 | 480.0517 | 497.5129 | 498.4204  | 548.7002 | 523.2616 | 376.831  | 403.005  | 504.1966 | 385.3572 | 0.210308 | 0.286762  | 0.184707 | 0.386541 | 0.020105 | 0.967712 |
| AT3G57350 | NUP93B    | 164.0687 | 123.113  | 110.7383 | 112.5895 | 100.0326 | 110.6493  | 118.2774 | 115.4412 | 104.4583 | 126.6587 | 143.6761 | 140.8133 | -0.29947 | 0.156899  | -0.23626 | 0.315475 | 0.03537  | 0.946891 |
| AT3G57360 | AT3G57360 | 7.133424 | 10.70548 | 14.1642  | 35.88015 | 41.73544 | 27.919154 | 25.7988  | 34.52448 | 45.88356 | 15.35257 | 9.312338 | 17.60041 | 1.51863  | 0.000111  | 1.505296 | 0.000199 | 0.38524  | 0.669497 |
| AT3G57370 | AT3G57370 | 0        | 3.568492 | 1.287654 | 2.062078 | 0        | 0         | 1.07889  | 0        | 3.838143 | 0        | 0        | 0        | -0.2367  | 0.721473  | -0.39778 | 0.531752 | -0.04031 | NA       |
| AT3G57380 | AT3G57380 | 3.566712 | 8.92123  | 2.57309  | 17.73387 | 23.84882 | 28.90838  | 24.01119 | 20.49891 | 16.59618 | 7.676285 | 2.660668 | 8.287252 | 1.827053 | 9.61E-05  | 1.656793 | 0.000703 | 0.270309 | NA       |
| AT3G57390 | AGL18     | 54.68958 | 46.39246 | 36.05432 | 96.91766 | 108.6446 | 79.74726  | 97.82338 | 81.99564 | 91.76712 | 47.01725 | 58.53469 | 43.50807 | 1.017918 | 3.01E-05  | 0.94048  | 0.000218 | 0.095768 | 0.87985  |
| AT3G57400 | AT3G57400 | 524.3066 | 576.3115 | 497.0346 | 228.906  | 225.9013 | 266.1565  | 369.502  | 366.8226 | 373.9022 | 558.4497 | 606.6323 | 459.9423 | -1.1355  | 1.93E-16  | -0.51407 | 0.000495 | 0.025005 | 0.949258 |
| AT3G57410 | VLN3      | 1293.527 | 1182.955 | 974.7543 | 729.9756 | 712.8148 | 106.0967  | 928.4328 | 872.822  | 688.2534 | 885.6514 | 876.6901 | 1003.795 | -0.54109 | 0.001376  | -0.46202 | 0.008768 | -0.31276 | 0.239857 |
| AT3G57420 | AT3G57420 | 273.4479 | 267.6369 | 195.7235 | 207.3262 | 198.0777 | 240.2338  | 224.9938 | 231.9613 | 188.4515 | 211.0978 | 243.4511 | 186.4632 | -0.18937 | 0.369964  | -0.18433 | 0.41692  | -0.19768 | 0.574078 |
| AT3G57430 | PCMP-H81  | 123.646  | 112.4075 | 123.3272 | 85.78244 | 86.78321 | 94.69987  | 133.3955 | 132.7035 | 83.95716 | 97.87263 | 94.45371 | 119.1293 | -0.41942 | 0.068387  | -0.0363  | 0.908149 | -0.19643 | 0.648366 |
| AT3G57440 | AT3G57440 | 2.377808 | 7.136984 | 16.73951 | 5.773818 | 11.92441 | 4.984204  | 8.893035 | 8.63112  | 6.833722 | 11.51443 | 13.30334 | 15.5386  | -0.16657 | 0.806054  | -0.08561 | 0.909292 | 0.492393 | NA       |
| AT3G57450 | AT3G57450 | 29.7226  | 16.05821 | 42.49259 | 131.973  | 137.7932 | 184.4155  | 214.3221 | 134.8612 | 562.3177 | 42.21957 | 35.91902 | 72.51346 | 1.8128   | 0.000271  | 2.644596 | 4.5E-08  | 0.553981 | 0.553236 |
| AT3G57460 | AT3G57460 | 36.85602 | 60.66437 | 41.20494 | 63.84559 | 639.9434 | 743.6432  | 577.158  | 482.2638 | 393.4271 | 66.46235 | 30.59768 | 24.86176 | 3.761498 | 1.12E-69  | 3.292374 | 7.56E-53 | -0.51544 | 0.236522 |
| AT3G57470 | AT3G57470 | 1299.472 | 1290.01  | 1300.531 | 886.6935 | 873.7943 | 1132.411  | 1333.955 | 1265.538 | 638.6449 | 1332.795 | 1293.085 | 1292.811 | -0.41366 | 0.086177  | -0.25547 | 0.344023 | 0.010295 | 0.987891 |
| AT3G57480 | SAP13     | 79.65656 | 89.2123  | 118.4642 | 185.587  | 210.6646 | 134.5735  | 167.1891 | 139.1768 | 149.3656 | 79.64146 | 97.11438 | 89.08796 | 0.863085 | 0.0001    | 0.64144  | 0.000743 | -0.11569 | 0.83156  |
| AT3G57490 | RP52D     | 140.2907 | 158.7979 | 163.5321 | 223.9417 | 219.2767 | 204.3524  | 150.2923 | 156.439  | 187.4392 | 160.2424 | 152.9884 | 167.8169 | 0.485112 | 0.003511  | 0.096157 | 0.668814 | 0.060837 | 0.880712 |
| AT3G57500 | AT3G57500 | 5.94452  | 3.568492 | 3.862963 | 6.598649 | 7.28714  | 3.987363  | 1.778607 | 4.31556  | 1.952492 | 6.716749 | 9.312338 | 4.143626 | 0.319424 | 6.44926   | -0.49983 | 0.491057 | 0.388655 | NA       |
| AT3G57510 | ADP61     | 0        | 1.287654 | 1.287654 | 25.56977 | 15.23675 | 12.95899  | 16.89677 | 7.55223  | 8.33722  | 0        | 0        | 0        | 2.813833 | 5.42E-07  | 2.104032 | 0.00038  | -0.33825 | NA       |
| AT3G57520 | RF52      | 476.7505 | 446.0615 | 394.0222 | 519.6436 | 494.2006 | 843.273   | 1286.822 | 1722.987 | 1207.616 | 520.0683 | 439.0102 | 538.6714 | 0.474746 | 0.038298  | 1.623555 | 2.67E-15 | 0.180122 | 0.681871 |
| AT3G57530 | CPK32     | 290.0926 | 276.5581 | 257.5309 | 300.2385 | 269.6242 | 412.6921  | 542.4751 | 618.2039 | 624.7974 | 207.2597 | 190.2378 | 228.9353 | 0.239078 | 0.232653  | 1.091792 | 1.57E-10 | -0.38404 | 0.176345 |
| AT3G57540 | AT3G57540 | 20.21137 | 19.62671 | 24.46543 | 44.12847 | 31.13596 | 32.89575  | 24.9005  | 42.07671 | 31.23987 | 23.98839 | 17.29434 | 19.68222 | 0.701458 | 0.051782  | 0.539372 | 1.805133 | -0.06641 | 0.946817 |
| AT3G57550 | GK-2      | 233.0252 | 230.1677 | 225.3935 | 371.9988 | 360.3822 | 434.6226  | 435.2861 | 413.2148 | 406.1183 | 202.462  | 129.0424 | 247.5817 | 0.738736 | 0.00149   | 0.77363  | 8.85E-05 | -0.2337  | 0.506711 |
| AT3G57560 | NAGK      | 342.4043 | 324.7328 | 321.9136 | 273.8439 | 294.7979 | 269.147   | 315.7027 | 274.038  | 323.1374 | 286.9012 | 369.8328 | 274.5152 | -0.23601 | 0.15857   | -0.11328 | 0.565346 | -0.09295 | 0.781547 |
| AT3G57570 | AT3G57570 | 263.9367 | 219.4623 | 221.4765 | 178.5759 | 175.5538 | 232.2639  | 198.3147 | 201.7524 | 150.3419 | 300.5429 | 183.5861 | 207.1813 | -0.27383 | 0.171264  | -0.35292 | 0.086086 | -0.2492  | 0.446233 |
| AT3G57580 | AT3G57580 | 40.42273 | 44.60615 | 41.20494 | 45.77813 | 50.34751 | 39.87363  | 37.35075 | 38.84004 | 41.00233 | 33.58375 | 29.26735 | 30.04129 | 0.121523 | 0.722355  | -0.09563 | 0.807312 | -0.40414 | 0.422571 |
| AT3G57586 | AT3G57586 | 7.133424 | 5.352738 | 1.287654 | 0.824831 | 0        | 1.993682  | 3.57214  | 5.39445  | 0.976246 | 2.878607 | 1.330334 | 5.179533 | -1.20216 | 0.065054  | -0.27519 | 0.704035 | -0.29946 | NA       |
| AT3G57590 | AT3G57590 | 60.6341  | 64.23286 | 50.21852 | 68.8734  | 78.83361 | 83.73463  | 81.74428 | 80.91675 | 72.2422  | 62.36982 | 47.89202 | 65.26211 | 0.348408 | 0.128059  | 0.348408 | 0.205666 | 0.021963 | 0.975777 |
| AT3G57600 | DREB2F    | 61.82301 | 64.23286 | 51.50617 | 103.1039 | 118.5816 | 102.6746  | 126.2811 | 133.7824 | 123.007  | 97.87263 | 101.1054 | 78.7289  | 0.845164 | 6.01E-05  | 1.077851 | 2.95E-07 | 0.621729 | 0.039528 |
| AT3G57610 | PURF      | 813.2103 | 826.1059 | 767.442  | 490.7745 | 480.2888 | 523.3414  | 487.3383 | 575.0483 | 546.6978 | 662.0796 | 514.8392 | 740.6732 | -0.57829 | 0.263E-06 | -0.57262 | 0.000124 | -0.31906 | 0.154855 |
| AT3G57620 | AT3G57620 | 2.377808 | 0        | 1.287654 | 0        | 0        | 0         | 0.889303 | 0        | 10.55489 | 1.330334 | 1.035907 | 0        | -0.75523 | 0.23145   | -0.46087 | 0.509974 | 0.878048 | NA       |
| AT3G57630 | AT3G57630 | 154.5575 | 135.6027 | 127.4778 | 166.2035 | 149.0551 | 181.425   | 172.5429 | 174.7802 | 111.292  | 96.9131  | 123.7211 | 85.98024 | 0.237386 | 0.3381    | 1.128034 | 0.657832 | -0.44102 | 0.212851 |
| AT3G57640 | AT3G57640 | 47.55616 | 44.60615 | 47.64321 | 82.0707  | 92.08295 | 103.6714  | 142.2886 | 108.9679 | 152.2944 | 40.3005  | 27.93701 | 42.47217 | 0.930962 | 0.000145  | 1.468477 | 5.61E-10 | -0.3055  | 0.548923 |
| AT3G57645 | U2.2      | 0        | 0        | 0        | 0.262078 | 0        | 0.996841  | 0.889303 | 1.07889  | 0.976246 | 0        | 1.330334 | 0        | 0.550155 | NA        | 0.476933 | NA       | 0.184607 | NA       |
| AT3G57650 | LPAT2     | 407.7941 | 358.6335 | 383.721  | 315.0855 | 312.0221 | 340.9195  | 343.2711 | 305.3259 | 254.8002 | 330.0803 | 320.6105 | 286.9461 | -0.25102 | 0.116835  | -0.34504 | 0.033564 | -0.29376 | 0.214384 |
| AT3G57660 | NRPA1     | 445.839  | 333.654  | 328.3519 | 190.1236 | 181.516  | 265.1596  | 267.6803 | 279.4325 | 197.2017 | 282.1035 | 246.1118 | 270.3176 | -0.78887 | 0.907E-05 | -0.56115 | 0.008889 | -0.46035 | 0.13032  |
| AT3G57670 | WIP2      | 13.07794 | 10.70548 | 12.87654 | 12.78488 | 14.57428 | 12.95893  | 7.114428 | 15.10446 | 4.88123  | 13.4335  | 19.95501 | 13.46678 | 0.107971 | 0.854285  | -0.39225 | 0.496768 | 0.276305 | NA       |
| AT3G57680 | CTPA3     | 40.42273 | 41.03766 | 28.3284  | 26.3946  | 22.52389 | 19.93682  | 40.01866 | 47.47116 | 36.1211  | 101.7108 | 82.48071 | 73.54936 | -0.60053 | 0.056691  | 0.163249 | 0.467374 | 1.185613 | 0.000322 |
| AT3G57690 | AGP23     | 0        | 1.784246 | 0        | 0.824831 | 0        | 0         | 0        | 0        | 0.976246 | 0.995936 | 1.330334 | 1.035907 | -0.12565 | NA        | -0.10736 | NA       |          |          |

|           |           |          |          |          |          |          |          |          |          |          |          |          |          |          |           |           |          |          |          |
|-----------|-----------|----------|----------|----------|----------|----------|----------|----------|----------|----------|----------|----------|----------|----------|-----------|-----------|----------|----------|----------|
| AT3G58180 | AT3G58180 | 147.4241 | 139.1712 | 167.3951 | 164.1414 | 192.7778 | 203.3555 | 184.9751 | 162.9124 | 178.653  | 155.4448 | 115.7391 | 153.3142 | 0.283395 | 0.149712  | 0.205985  | 0.351893 | -0.09033 | 0.835863 |
| AT3G58190 | LBD29     | 0        | 0        | 0        | 0        | 0        | 0        | 0        | 0        | 0        | 0        | 0        | 0        | #N/A     | #N/A      | #N/A      | #N/A     | #N/A     | #N/A     |
| AT3G58193 | AT3G58193 | 0        | 0        | 0        | 0.412416 | 0        | 0        | 0        | 0        | 0        | 0        | 1.330334 | 0        | 0.067751 | NA        | 0         | NA       | 0.180865 | NA       |
| AT3G58196 | AT3G58196 | 0        | 0        | 0        | 0        | 0        | 0        | 0        | 0        | 0        | 0        | 0        | 0        | #N/A     | #N/A      | #N/A      | #N/A     | #N/A     | #N/A     |
| AT3G58200 | AT3G58200 | 32.10041 | 28.54794 | 34.76667 | 16.90904 | 25.83622 | 11.96209 | 14.22886 | 17.26224 | 20.50117 | 30.70514 | 21.28534 | 36.25673 | -0.71598 | 0.065604  | -0.79821  | 0.046775 | -0.09318 | 0.917498 |
| AT3G58210 | AT3G58210 | 0        | 0        | 0        | 0        | 0.662467 | 0        | 0.889303 | 0        | 0        | 0        | 0        | 0        | 0.099976 | NA        | 0.14456   | NA       | 0.164373 | NA       |
| AT3G58220 | AT3G58220 | 280.5813 | 244.4417 | 243.3667 | 225.1789 | 259.0247 | 216.3144 | 272.1269 | 240.5925 | 246.9902 | 272.5081 | 267.3971 | 276.587  | -0.1336  | 0.439898  | -0.01849  | 0.93266  | 0.082977 | 0.798806 |
| AT3G58230 | AT3G58230 | 0        | 0        | 0        | 0        | 0        | 0        | 1.07889  | 0        | 0.959536 | 0        | 0        | 0        | 0        | NA        | 0.156853  | NA       | 0.149599 | NA       |
| AT3G58240 | AT3G58240 | 0        | 0        | 0        | 0        | 0        | 0        | 0        | 0        | 0.959536 | 0        | 0        | 1.035907 | 0        | NA        | 0         | NA       | 0.332992 | NA       |
| AT3G58250 | AT3G58250 | 0        | 0        | 0        | 0        | 0        | 0        | 0        | 0        | 0        | 0        | 0        | 1.035907 | 0        | NA        | 0         | NA       | 0.172362 | NA       |
| AT3G58260 | AT3G58260 | 2.377808 | 0        | 0        | 0.412416 | 0        | 0        | 0        | 0        | 0        | 3.838143 | 1.330334 | 0        | -0.36519 | NA        | -0.42242  | NA       | 0.34293  | NA       |
| AT3G58270 | AT3G58270 | 68.95643 | 64.23286 | 59.2321  | 111.3522 | 113.2819 | 117.6272 | 82.70522 | 103.5734 | 122.0307 | 40.3005  | 57.20436 | 55.93895 | 0.799141 | 0.0000454 | 0.650755  | 0.007709 | -0.32472 | 0.467976 |
| AT3G58280 | AT3G58280 | 0        | 1.784246 | 2.575309 | 0        | 0        | 0        | 0        | 0        | 0        | 0        | 0        | 0        | -0.69637 | NA        | -0.66291  | NA       | -0.65361 | NA       |
| AT3G58290 | AT3G58290 | 0        | 0        | 1.287654 | 0.824831 | 0.662467 | 0        | 0.889303 | 2.15778  | 0        | 0        | 0        | 0        | 0.012656 | NA        | 0.232817  | NA       | 0.237615 | NA       |
| AT3G58300 | AT3G58300 | 0        | 0        | 0        | 0        | 0        | 0        | 0        | 0        | 0        | 0        | 0        | 1.035907 | 0        | NA        | 0         | NA       | 0.172362 | NA       |
| AT3G58310 | CRSP61    | 0        | 0        | 0        | 0        | 0        | 0        | 0        | 0        | 0        | 0        | 1.330334 | 0        | 0        | NA        | 0         | NA       | 0.172362 | NA       |
| AT3G58320 | AT3G58320 | 0        | 0        | 0        | 0        | 0.662467 | 0        | 0        | 0        | 0        | 0        | 0        | 0        | #N/A     | #N/A      | #N/A      | #N/A     | #N/A     | #N/A     |
| AT3G58330 | AT3G58330 | 0        | 0        | 0        | 0        | 0.662467 | 0        | 0        | 0        | 0        | 0        | 0        | 1.035907 | 0.098893 | NA        | 0         | NA       | 0.150283 | NA       |
| AT3G58340 | AT3G58340 | 0        | 1.784246 | 0        | 0        | 0        | 0        | 0        | 0        | 0.976246 | 0.959536 | 0        | 1.035907 | -0.33784 | NA        | -0.08973  | NA       | 0.104127 | NA       |
| AT3G58347 | AT3G58347 | 0        | 0        | 0        | 0        | 0        | 0        | 0        | 0        | 0        | 0        | 0        | 0        | #N/A     | #N/A      | #N/A      | #N/A     | #N/A     | #N/A     |
| AT3G58350 | RTM3      | 11.88904 | 7.136984 | 23.17778 | 9.485558 | 14.57428 | 10.96525 | 5.335821 | 7.55223  | 5.857476 | 13.4335  | 13.30334 | 12.43088 | -0.26033 | 0.639901  | -0.97584  | 0.064099 | -0.11827 | NA       |
| AT3G58360 | AT3G58360 | 0        | 0        | 0        | 0        | 0        | 0        | 0        | 0        | 0        | 0        | 0        | 0        | #N/A     | #N/A      | #N/A      | #N/A     | #N/A     | #N/A     |
| AT3G58370 | AT3G58370 | 0        | 0        | 0        | 0        | 0        | 0        | 0        | 0        | 0        | 0        | 0        | 0        | #N/A     | #N/A      | #N/A      | #N/A     | #N/A     | #N/A     |
| AT3G58380 | AT3G58380 | 0        | 1.784246 | 2.575309 | 2.062078 | 3.312336 | 9.968408 | 7.114428 | 4.31556  | 3.904984 | 2.878607 | 2.660668 | 2.071813 | 0.886247 | 0.182885  | 0.955995  | 0.167016 | 0.329051 | NA       |
| AT3G58390 | PEL2      | 1.188904 | 5.352738 | 3.862963 | 4.536571 | 4.637271 | 1.993682 | 4.46517  | 4.31556  | 9.282738 | 5.757214 | 0        | 2.071813 | 0.141507 | 0.860477  | 0.143308  | 0.868638 | -0.14532 | NA       |
| AT3G58400 | AT3G58400 | 0        | 0        | 0        | 0        | 0        | 0        | 0        | 0        | 0        | 0        | 0        | 0        | #N/A     | #N/A      | #N/A      | #N/A     | #N/A     | #N/A     |
| AT3G58410 | AT3G58410 | 0        | 1.784246 | 0        | 0        | 0        | 0        | 0        | 0        | 0        | 0        | 0        | 0        | -0.2184  | NA        | -0.20558  | NA       | -0.19918 | NA       |
| AT3G58420 | AT3G58420 | 0        | 0        | 0        | 0        | 0        | 0        | 1.778607 | 0        | 0        | 0.959536 | 0        | 0        | 0        | NA        | 0.262373  | NA       | 0.143228 | NA       |
| AT3G58430 | AT3G58430 | 58.25629 | 46.3904  | 70.82099 | 59.80026 | 72.20893 | 36.88311 | 61.36194 | 47.47116 | 52.71728 | 62.36982 | 67.84703 | 64.2262  | -0.04358 | 0.90844   | -0.12205  | 0.750234 | 0.124879 | 0.848756 |
| AT3G58440 | AT3G58440 | 2.377808 | 0        | 0        | 0.412416 | 0        | 0        | 0        | 0        | 0        | 0        | 0        | 0        | -0.2809  | NA        | -0.35899  | NA       | -0.35366 | NA       |
| AT3G58450 | AT3G58450 | 0        | 1.784246 | 2.575309 | 0.412416 | 0        | 0        | 0        | 0        | 0        | 0        | 0        | 0        | -0.5844  | NA        | -0.6756   | NA       | -0.66416 | NA       |
| AT3G58460 | RBL15     | 244.9412 | 228.3835 | 225.3395 | 348.0787 | 345.8079 | 366.8374 | 312.1455 | 308.5625 | 233.3228 | 213.9764 | 192.8984 | 206.1454 | 0.589821 | 0.000115  | 0.283     | 0.109088 | -0.18436 | 0.538195 |
| AT3G58470 | AT3G58470 | 130.7794 | 155.2294 | 222.7642 | 174.8642 | 192.778  | 210.3334 | 190.3109 | 193.1213 | 125.9357 | 184.2308 | 208.8624 | 150.2064 | 0.171942 | 0.541347  | -4E-05    | 1        | 0.086608 | 0.878139 |
| AT3G58480 | AT3G58480 | 1.188904 | 0        | 2.575309 | 1.649662 | 0        | 0.996841 | 1.778607 | 2.15778  | 0        | 0.959536 | 2.660668 | 2.071813 | -0.20331 | 0.194504  | -0.01175  | 0.989896 | 0.195253 | NA       |
| AT3G58490 | LPPD      | 568.2961 | 642.3286 | 565.2803 | 381.4844 | 346.4704 | 385.7774 | 298.806  | 286.9847 | 247.9665 | 378.057  | 439.0102 | 389.5009 | -0.66229 | 2.8E-07   | -1.07315  | 1.53E-16 | -0.55081 | 0.000601 |
| AT3G58500 | PP2A3     | 1272.127 | 1348.89  | 1381.653 | 1429.432 | 1331.559 | 1380.624 | 1399.764 | 1334.587 | 1472.179 | 1155.281 | 1136.105 | 1136.389 | 0.050263 | 0.672359  | 0.072222  | 0.548902 | -0.22147 | 0.117989 |
| AT3G58510 | RH11      | 441.0834 | 378.2602 | 289.7222 | 315.9103 | 292.1481 | 342.9132 | 304.1418 | 356.0337 | 286.0401 | 307.0514 | 264.7365 | 283.8384 | -0.22    | 0.262527  | -0.2261   | 0.274998 | -0.36459 | 0.181229 |
| AT3G58520 | AT3G58520 | 19.02246 | 24.97944 | 20.60247 | 34.23049 | 34.4483  | 23.92418 | 28.45771 | 34.52448 | 36.1211  | 29.7456  | 19.95501 | 29.00538 | 0.514554 | 0.158286  | 0.576492  | 0.133875 | 0.287769 | 0.681525 |
| AT3G58530 | AT3G58530 | 124.8349 | 140.9554 | 126.1901 | 191.7732 | 207.3523 | 211.3302 | 209.8756 | 217.9358 | 172.7955 | 145.8494 | 142.3457 | 97.37521 | 0.625644 | 0.001116  | 0.650204  | 0.002401 | -0.02112 | 0.970744 |
| AT3G58540 | AT3G58540 | 0        | 0        | 5.150617 | 4.124156 | 2.649869 | 5.981045 | 4.446517 | 1.07889  | 9.76246  | 2.878607 | 2.660668 | 1.035907 | 0.602248 | 0.397152  | 0.781625  | 0.276841 | 0.091418 | NA       |
| AT3G58550 | AT3G58550 | 2.377808 | 1.784246 | 2.575309 | 10.7228  | 15.89921 | 9.968408 | 5.335821 | 9.710009 | 9.76246  | 0.959536 | 2.660668 | 2.071813 | 1.701535 | 0.002324  | 0.189333  | 0.053742 | -0.19527 | NA       |
| AT3G58560 | CCR4-1    | 674.1085 | 692.2875 | 686.3198 | 674.2995 | 592.2457 | 699.7822 | 635.852  | 712.0674 | 442.2394 | 652.4842 | 605.302  | 630.8671 | -0.06113 | 0.781868  | -0.19396  | 0.339462 | -0.11694 | 0.741202 |
| AT3G58570 | RHS2      | 166.4466 | 101.702  | 95.28642 | 195.485  | 188.1407 | 217.3113 | 237.444  | 313.957  | 256.7527 | 122.8206 | 85.14137 | 97.37521 | 0.684818 | 0.00296   | 1.099895  | 7.38E-07 | -0.24574 | 0.584595 |
| AT3G58580 | CCR4-2    | 274.6368 | 246.226  | 244.6543 | 223.9417 | 172.2415 | 235.2544 | 226.7724 | 263.2491 | 157.1756 | 204.3811 | 170.2827 | 238.2585 | -0.27327 | 0.254924  | -0.27328  | 0.358958 | -0.30828 | 0.406849 |
| AT3G58590 | AT3G58590 | 29.7226  | 39.25341 | 25.75309 | 27.21943 | 23.18635 | 33.89259 | 36.46144 | 38.84004 | 26.35864 | 28.78607 | 34.58868 | 32.82585 | -0.15415 | 0.70512   | -0.115029 | 0.800022 | -0.10036 | 0.900529 |
| AT3G58600 | AT3G58600 | 193.7913 | 190.9143 | 239.5037 | 409.9411 | 399.4678 | 369.8279 | 304.1418 | 305.3259 | 372.926  | 208.2192 | 252.7635 | 225.8276 | 0.901032 | 4.56E-09  | 0.638308  | 8.81E-05 | 0.12595  | 0.71153  |
| AT3G58610 | AT3G58610 | 2702.379 | 2613.92  | 2285.586 | 1473.561 | 1451.693 | 1474.328 | 1571.399 | 1796.352 | 1804.103 | 1994.875 | 1974.216 | 2341.149 | -0.79289 | 5.25E-12  | -0.55042  | 3.67E-06 | -0.26548 | 0.141792 |
| AT3G58620 | TTL4      | 241.3475 | 235.5205 | 226.6272 | 120.0129 | 101.3575 | 131.583  | 134.2848 | 141.3346 | 153.2706 | 247.5602 | 275.6271 | 236.1867 | -0.98443 | 0.72E-10  | -0.7017   | 1.93E-05 | 0.105157 | 0.754927 |
| AT3G58630 | AT3G58630 | 63.01191 | 69.5856  | 50.21852 | 72.58514 | 70.22153 | 54.82624 | 52.46891 | 60.41784 | 98.60085 | 51.81492 | 66.5167  | 45.57989 | 0.126271 | 0.727112  | 0.205538  | 0.572792 | -0.15009 | 0.818128 |
| AT3G58640 | AT3G58640 | 600.3965 | 565.606  | 493.1716 | 433.4488 | 400.7927 | 533.3098 | 396.6294 | 568.575  | 414.9045 | 403.9645 | 429.6979 | 444.4039 | -0.27675 | 0.147846  | -0.26191  | 0.19696  | -0.36875 | 0.713132 |
| AT3G58650 | AT3G58650 | 86.78999 | 71.36984 | 56.65679 | 70.93548 | 55.64725 | 78.75042 | 70.25498 | 85.23231 | 75.17094 | 92.92471 | 99.86503 | 105.6625 | -0.07191 | 0.837615  | 0.091844  | 0.805574 | 0.148329 | 0.799226 |
| AT3G58660 | AT3G58660 | 316.2484 | 269.4212 | 238.2161 | 246.6245 | 261.0121 | 247.2165 | 202.7612 | 245.9869 | 393.4721 | 249.4793 | 210.1928 | 277.6229 | -0.12292 | 0.669079  | 0.028837  | 0.931725 | -0.15313 | 0.752829 |
| AT3G58670 | PCO5      | 175.9578 | 190.9143 | 173.8333 | 185.9944 | 172.2415 | 187.4061 | 217.8794 | 178.0168 | 169.8668 | 158.3234 | 155.6491 | 164.7091 | 0.016892 | 0.941698  | 0.071853  | 0.705721 | -0.16699 | 0.602936 |
| AT3G58676 | AT3G58676 | 0        | 0        | 0        | 0.662467 | 0        | 0        | 0        | 0        | 0        | 0        | 0        | 0        | 0.128567 | NA        | 0         | NA       | 0        | NA       |
| AT3G58680 | MBF19     | 817.9659 | 110.804  | 938.7    | 1622.443 | 1526.987 | 1344.738 | 1604.303 | 1469.448 | 2348.848 | 1111.142 | 1185.328 | 1136.389 | 0.682288 | 0.000133  | 0.946647  | 5.8E-08  | 0.300886 | 0.309528 |
| AT3G58690 | AT3G58690 | 137.9129 | 117.7602 | 139.0667 | 89.9066  | 81.48347 | 95.69671 | 108.495  | 107.889  | 78.09968 | 152.5662 | 111.7481 | 154.3501 | -0.55797 | 0.008744  | -0.41655  | 0.07373  | 0.084761 | 0.862386 |
| AT3G58700 | RP11B     | 40.0606  | 408.5923 | 500.8975 | 475.8655 | 465.7145 | 418.6731 | 357.5    | 332.2941 | 504.7192 | 443.3055 | 645.212  | 424.721  | 0.051083 | 0.833652  | -0.13001  | 0.631718 | 0.197772 | 0.617081 |
| AT3G58710 |           |          |          |          |          |          |          |          |          |          |          |          |          |          |           |           |          |          |          |

|           |           |          |           |          |          |          |          |          |          |          |          |          |          |           |          |           |          |            |          |
|-----------|-----------|----------|-----------|----------|----------|----------|----------|----------|----------|----------|----------|----------|----------|-----------|----------|-----------|----------|------------|----------|
| AT3G59140 | ABCC10    | 229.4585 | 185.5616  | 171.258  | 131.1482 | 135.8058 | 141.5514 | 167.1891 | 154.2813 | 93.71962 | 188.069  | 192.8984 | 170.9246 | -0.51133  | 0.02064  | -0.48451  | 0.037889 | -0.08871   | 0.860263 |
| AT3G59150 | AT3G59150 | 77.27876 | 49.95889  | 64.38272 | 80.00862 | 89.43308 | 86.72515 | 99.60199 | 88.46897 | 88.83839 | 66.20796 | 58.53469 | 65.26211 | 0.376301  | 0.113561 | 0.492299  | 0.04295  | -0.03034   | 0.962641 |
| AT3G59160 | AT3G59160 | 0        | 0         | 1.287654 | 0        | 0        | 0        | 0.889303 | 0        | 0        | 0        | 0        | 2.660668 | -0.25636  | NA       | -0.06123  | NA       | 0.161176   | NA       |
| AT3G59170 | AT3G59170 | 1.188904 | 0         | 1.287654 | 0        | 0        | 0        | 1.778607 | 0        | 0        | 0        | 0        | 0        | -0.45925  | NA       | -0.08491  | NA       | -0.4143    | NA       |
| AT3G59180 | AT3G59180 | 0        | 0         | 0        | 0        | 0        | 0        | 0.889303 | 0        | 0        | 0        | 0        | 0        | 0         | NA       | 0.160764  | 0        | 0          | NA       |
| AT3G59190 | AT3G59190 | 5.94452  | 1.784246  | 2.575309 | 5.773818 | 5.962205 | 3.987363 | 2.66791  | 1.07889  | 3.904984 | 2.878607 | 1.330334 | 4.143626 | 0.416664  | 0.557949 | -0.28427  | 0.726761 | -0.19555   | NA       |
| AT3G59200 | AT3G59200 | 8.322328 | 5.352738  | 6.438272 | 10.7228  | 10.59948 | 18.93997 | 13.33955 | 8.63112  | 7.009968 | 11.51443 | 10.64267 | 9.323159 | 0.742624  | 0.154304 | 0.417551  | 0.498101 | 0.447771   | NA       |
| AT3G59210 | AT3G59210 | 255.6143 | 301.5376  | 265.2568 | 408.7038 | 430.6037 | 468.5152 | 605.6157 | 522.1827 | 452.0091 | 331.0398 | 361.8508 | 298.3419 | 0.659635  | 2.29405  | 0.932201  | 1.030109 | 0.266785   | 0.31558  |
| AT3G59220 | PRN1      | 4.755616 | 5.352738  | 1.287654 | 23.09527 | 27.82363 | 24.92102 | 37.35075 | 25.89336 | 44.90732 | 8.635821 | 5.321336 | 4.143626 | 2.137337  | 2.7E-06  | 2.613342  | 6.45E-09 | 0.406192   | 0.694796 |
| AT3G59230 | AT3G59230 | 2.377808 | 1.784246  | 0        | 0        | 0        | 0.996841 | 0.889303 | 0        | 0        | 1.919071 | 3.991002 | 5.179533 | -0.66179  | 0.320456 | -0.53252  | 0.453237 | 0.754443   | NA       |
| AT3G59240 | AT3G59240 | 0        | 0         | 0        | 0        | 0.662467 | 0        | 0.889303 | 0        | 0        | 0        | 1.330334 | 0        | 0.09913   | NA       | 0.145297  | NA       | 0.18929    | NA       |
| AT3G59250 | AT3G59250 | 33.28931 | 33.90067  | 43.78025 | 4.124156 | 6.624673 | 1.993682 | 30.23632 | 14.02557 | 15.61994 | 60.45074 | 62.5257  | 58.01077 | -2.62049  | 3.3E-12  | -0.79948  | 0.035453 | 0.668782   | 1.835554 |
| AT3G59260 | AT3G59260 | 0        | 0         | 1.287654 | 0        | 0        | 0        | 0.889303 | 0        | 0        | 0        | 0        | 0        | -0.22368  | NA       | -0.20864  | NA       | -0.02973   | NA       |
| AT3G59270 | AT3G59270 | 13.07794 | 17.136984 | 5.150617 | 7.835896 | 9.937009 | 5.981045 | 8.003731 | 5.39445  | 3.904984 | 15.35257 | 7.982004 | 21.75404 | -0.08611  | 0.910408 | -0.42932  | 0.510469 | 0.67974    | NA       |
| AT3G59280 | TXR1      | 153.3686 | 190.9143  | 175.121  | 332.8194 | 355.7449 | 275.1281 | 280.1306 | 256.7758 | 314.3512 | 198.6239 | 202.2108 | 222.7199 | 0.888156  | 4.85E-08 | 0.706921  | 3.31E-05 | 0.265675   | 0.368214 |
| AT3G59290 | EPSN3     | 216.3805 | 167.7191  | 186.7099 | 136.0971 | 98.04516 | 158.4977 | 131.6169 | 190.9635 | 84.9334  | 144.8899 | 148.9974 | 136.7397 | -0.52257  | 0.059065 | -0.46982  | 0.110809 | -0.39148   | 0.381298 |
| AT3G59300 | AT3G59300 | 301.9816 | 344.3595  | 294.8728 | 217.7554 | 173.5664 | 247.2165 | 341.4925 | 331.2192 | 201.1067 | 334.8779 | 339.2352 | 371.8904 | -0.54409  | 0.011767 | -0.10108  | 0.721373 | 0.150991   | 0.725981 |
| AT3G59310 | AT3G59310 | 80.84547 | 103.4863  | 109.4506 | 125.7868 | 104.6698 | 172.4535 | 141.3993 | 113.2834 | 106.4108 | 98.83217 | 66.5167  | 127.4165 | 0.429244  | 0.132234 | 0.252884  | 0.036865 | 0.008128   | 0.991988 |
| AT3G59320 | AT3G59320 | 124.8349 | 146.3082  | 140.3543 | 108.0529 | 117.2567 | 129.5893 | 149.403  | 124.0723 | 85.90965 | 151.6066 | 107.7571 | 152.2783 | -0.20907  | 0.430154 | -0.18199  | 0.526994 | 0.021265   | 0.986233 |
| AT3G59330 | AT3G59330 | 77.27876 | 64.23286  | 81.12222 | 53.20161 | 54.98478 | 64.79465 | 72.03358 | 64.7334  | 53.69353 | 115.1443 | 97.11438 | 113.9497 | -0.38046  | 0.118434 | -0.22626  | 0.42495  | 0.52161    | 0.100977 |
| AT3G59340 | AT3G59340 | 0        | 0         | 0        | 0        | 0        | 0        | 0.889303 | 0        | 0        | 0.99536  | 0        | 0        | 0         | NA       | 0.13694   | NA       | 0.147196   | NA       |
| AT3G59350 | PT113     | 127.2127 | 160.5821  | 157.0938 | 367.0499 | 365.0195 | 514.3698 | 942.6617 | 1040.05  | 1134.398 | 147.7685 | 182.2558 | 146.0628 | 1.44602   | 1.08E-15 | 2.749125  | 6.76E-56 | 0.092774   | 0.841788 |
| AT3G59360 | UTR6      | 366.1824 | 326.517   | 346.379  | 347.2539 | 320.6342 | 381.79   | 363.7251 | 352.797  | 236.2515 | 303.2133 | 311.2981 | 279.6948 | 0.009867  | 0.968159 | -0.12458  | 0.583657 | -0.21516   | 0.507006 |
| AT3G59370 | AT3G59370 | 2.377808 | 3.568492  | 3.826963 | 0        | 0        | 0        | 0.889303 | 1.07889  | 0.976246 | 1.919071 | 7.982004 | 0        | -1.4397   | 0.021125 | -0.7482   | 0.291917 | -0.00287   | NA       |
| AT3G59380 | FTA       | 224.7028 | 285.4794  | 267.8321 | 312.1986 | 349.7827 | 303.0396 | 288.1343 | 305.3259 | 331.9329 | 257.1555 | 239.4601 | 215.4686 | 0.314495  | 0.050481 | 0.252884  | 0.150157 | -0.11796   | 0.715646 |
| AT3G59390 | AT3G59390 | 42.80054 | 39.25341  | 32.19136 | 64.74925 | 53.65985 | 36.88311 | 40.01866 | 38.84004 | 40.02609 | 49.89585 | 27.93701 | 36.25673 | 0.443607  | 0.182616 | 0.052655  | 0.907712 | 0.014699   | 0.987749 |
| AT3G59400 | GUN4      | 185.0768 | 1798.52   | 1570.938 | 837.2036 | 889.6935 | 653.9276 | 422.4192 | 389.4793 | 451.0256 | 1642.725 | 2062.018 | 1343.571 | -0.11793  | 6.58E-11 | -0.200626 | 7.45E-33 | -0.04974   | 0.90625  |
| AT3G59410 | GCN2      | 382.8271 | 322.9485  | 301.3111 | 261.4715 | 287.5108 | 331.948  | 354.8321 | 379.7693 | 262.6102 | 321.4444 | 393.7789 | 330.4542 | -0.19671  | 0.350495 | -0.01657  | 0.951075 | 0.048056   | 0.917863 |
| AT3G59415 | AT3G59415 | 0        | 0         | 0        | 0        | 0        | 0        | 0        | 0        | 0        | 0        | 0        | 0        | #N/A      | #N/A     | #N/A      | #N/A     | #N/A       | #N/A     |
| AT3G59420 | ACR4      | 115.3237 | 148.0924  | 118.4642 | 74.2348  | 74.8588  | 63.79781 | 88.04104 | 86.3112  | 56.62227 | 120.9015 | 131.7031 | 116.0215 | -0.79596  | 0.000175 | -0.69043  | 0.002174 | -0.04063   | 0.942789 |
| AT3G59430 | AT3G59430 | 51.12287 | 44.60615  | 52.79383 | 61.86234 | 58.95959 | 66.78833 | 59.58333 | 59.33895 | 45.88356 | 68.12703 | 62.5257  | 43.50807 | 0.30789   | 0.284694 | 0.132955  | 0.706308 | 0.20783    | 0.697129 |
| AT3G59440 | CML4      | 0        | 0         | 0        | 0.412416 | 1.324935 | 1.993682 | 0.889303 | 0        | 0        | 0        | 0        | 0        | 0.629064  | NA       | 0.147727  | NA       | 0.177575   | NA       |
| AT3G59450 | CML46     | 0        | 0         | 0        | 1.237247 | 1.324935 | 1.993682 | 0.889303 | 1.07889  | 1.952492 | 2.878607 | 2.660668 | 1.035907 | 0.704357  | 0.288056 | 0.615491  | 0.379392 | 0.962642   | NA       |
| AT3G59455 | AT3G59455 | 0        | 0         | 0        | 0        | 0        | 0        | 0        | 0        | 0        | 0        | 0        | 0        | #N/A      | #N/A     | #N/A      | #N/A     | #N/A       | #N/A     |
| AT3G59460 | AT3G59460 | 0        | 0         | 0        | 0        | 0        | 0        | 0        | 0        | 0        | 0        | 0        | 0        | #N/A      | #N/A     | #N/A      | #N/A     | #N/A       | #N/A     |
| AT3G59470 | AT3G59470 | 78.46766 | 80.29107  | 146.7926 | 133.2102 | 128.5187 | 94.69987 | 112.0522 | 103.5734 | 123.007  | 124.7396 | 160.9704 | 122.237  | 0.214336  | 0.473726 | 0.134197  | 0.692104 | 0.385523   | 0.368169 |
| AT3G59480 | AT3G59480 | 4.755616 | 1.784246  | 5.150617 | 5.773818 | 9.937009 | 1.993682 | 4.446517 | 2.15778  | 10.73871 | 9.595356 | 6.65167  | 9.323159 | 0.369986  | 0.59501  | 0.332455  | 0.671123 | 0.733441   | NA       |
| AT3G59490 | AT3G59490 | 66.57862 | 74.93833  | 110.7383 | 125.7868 | 132.4935 | 116.6304 | 127.1574 | 113.2834 | 104.5583 | 91.15588 | 73.16837 | 107.7343 | 0.550829  | 0.018635 | 0.431829  | 0.091809 | 0.108086   | 0.843797 |
| AT3G59500 | AT3G59500 | 155.7464 | 205.1883  | 224.0519 | 362.1009 | 391.5182 | 398.7363 | 319.2599 | 282.6692 | 305.565  | 171.7569 | 135.6941 | 196.8222 | 0.961356  | 1.6E-08  | 0.625719  | 0.000589 | -0.19703   | 0.570796 |
| AT3G59510 | AT3G59510 | 4.755616 | 14.27397  | 11.58889 | 12.37247 | 7.28714  | 13.95577 | 13.33955 | 14.02557 | 10.73871 | 10.55489 | 17.29434 | 12.43088 | 0.136057  | 0.824646 | -0.298704 | 0.623679 | 0.348493   | NA       |
| AT3G59520 | ATRB113   | 112.9459 | 112.4075  | 112.6025 | 102.2791 | 102.02   | 112.643  | 102.2699 | 100.3368 | 112.2683 | 91.15588 | 97.11438 | 104.6266 | -0.09517  | 0.678596 | -0.09671  | 0.699889 | -0.19987   | 0.580257 |
| AT3G59530 | SSL13     | 47.55616 | 42.8219   | 51.50617 | 26.80701 | 31.79843 | 32.89575 | 31.12562 | 36.68226 | 34.16861 | 39.34096 | 47.89202 | 32.1131  | -0.62416  | 0.0326   | -0.4601   | 0.159668 | -0.25472   | 0.648286 |
| AT3G59540 | RPL38B    | 558.7849 | 487.0992  | 536.9519 | 749.5919 | 713.4773 | 567.2024 | 484.6704 | 429.3982 | 966.4835 | 507.5943 | 645.212  | 810.0789 | 0.341402  | 0.25623  | 0.235427  | 0.479915 | 0.293971   | 0.555713 |
| AT3G59550 | SYN3      | 84.74506 | 28.54794  | 36.05432 | 22.68286 | 15.23675 | 20.93366 | 24.81447 | 10.73871 | 38.38143 | 46.56169 | 40.40035 | 0        | -0.88073  | 0.011215 | -0.09332  | 0.007152 | 0.112301   | 0.887392 |
| AT3G59570 | AT3G59570 | 89.1678  | 80.29107  | 100.437  | 152.5938 | 117.9192 | 148.5293 | 109.3843 | 107.889  | 110.3158 | 77.72239 | 103.766  | 79.7648  | 0.610975  | 0.003257 | 0.262767  | 0.293441 | -0.06561   | 0.901181 |
| AT3G59580 | NLP9      | 45.17835 | 53.2738   | 72.10663 | 2.62078  | 19.87402 | 19.93682 | 37.35075 | 48.50005 | 38.07359 | 77.72239 | 78.4897  | 55.93895 | -1.40336  | 7.31E-07 | -0.44246  | 0.171343 | 0.29756    | 0.59327  |
| AT3G59590 | JAL37     | 0        | 0         | 0        | 0        | 0        | 0        | 0        | 0        | 0        | 0        | 0        | 0        | 0         | NA       | 0         | NA       | 0.172362   | NA       |
| AT3G59600 | NRPB8B    | 170.0133 | 167.7191  | 203.4494 | 269.3074 | 291.4856 | 230.2702 | 251.6729 | 212.5413 | 265.5389 | 189.0285 | 142.3457 | 224.7917 | 0.535069  | 0.006955 | 0.418464  | 0.050295 | 0.042223   | 0.935116 |
| AT3G59610 | JAL38     | 0        | 1.784246  | 0        | 0.412416 | 0        | 0        | 0.889303 | 0        | 0        | 0        | 1.330334 | 0        | -0.19572  | NA       | -0.09468  | NA       | -0.04737   | NA       |
| AT3G59620 | JAL39     | 0        | 0         | 0        | 0        | 0        | 0        | 1.778607 | 0        | 0        | 0        | 0        | 0        | 0         | NA       | 0.248756  | NA       | 0.118802   | NA       |
| AT3G59630 | AT3G59630 | 192.6024 | 148.0924  | 199.5864 | 159.1924 | 163.6294 | 177.4377 | 156.5174 | 133.7824 | 106.4108 | 165.0401 | 148.9974 | 131.5601 | -0.421274 | 0.604688 | -0.4412   | 0.038497 | -0.27915   | 0.411802 |
| AT3G59640 | AT3G59640 | 66.57862 | 80.29107  | 47.64321 | 140.6337 | 120.569  | 96.69356 | 117.3881 | 111.1257 | 163.0331 | 76.91235 | 55.87403 | 92.19568 | 0.859959  | 0.001273 | 0.972987  | 0.000307 | 0.218074   | 0.694775 |
| AT3G59650 | AT3G59650 | 91.54566 | 67.80135  | 79.83457 | 108.0529 | 104.6698 | 75.7599  | 56.91542 | 51.78672 | 113.2445 | 96.76311 | 45.23135 | 68.36983 | 0.253368  | 0.504857 | -0.10574  | 0.815591 | -0.16544</ |          |

|           |           |          |          |          |          |          |          |          |          |          |          |          |          |          |          |          |          |           |          |
|-----------|-----------|----------|----------|----------|----------|----------|----------|----------|----------|----------|----------|----------|----------|----------|----------|----------|----------|-----------|----------|
| AT3G60110 | AT3G60110 | 79.65656 | 78.50683 | 74.68395 | 100.217  | 111.2945 | 98.68724 | 110.2736 | 111.1257 | 186.463  | 67.16749 | 61.19536 | 49.72351 | 0.397337 | 0.140316 | 0.776945 | 0.002315 | -0.36711  | 0.420047 |
| AT3G60120 | BGLU27    | 0        | 0        | 1.287654 | 12.37247 | 7.949607 | 7.974726 | 6.225124 | 1.07889  | 5.857476 | 0        | 0        | 0.271813 | 2.07195  | 0.000568 | 1.205943 | 0.070019 | 0.033029  | 0.973731 |
| AT3G60130 | BGLU16    | 425.6276 | 556.6848 | 521.5    | 361.6885 | 337.1958 | 431.6321 | 405.5224 | 411.0571 | 378.7834 | 492.2418 | 468.2776 | 435.0807 | -0.40621 | 0.008342 | -0.32153 | 0.051679 | -0.10116  | 7.50218  |
| AT3G60140 | BGLU30    | 8.322328 | 12.48972 | 51.50617 | 251.9859 | 251.0751 | 404.7174 | 364.6144 | 336.6137 | 166.9381 | 5.757214 | 3.991002 | 1.035907 | 2.693353 | 3.65E-07 | 2.64106  | 7.06E-07 | -1.36574  | 0.088423 |
| AT3G60150 | AT3G60150 | 16.64466 | 21.41095 | 28.3284  | 37.1174  | 37.09817 | 39.87363 | 31.12562 | 39.91893 | 40.02609 | 26.867   | 30.59768 | 24.86176 | 0.719572 | 0.029289 | 0.680638 | 0.05579  | 0.273448  | 0.685946 |
| AT3G60160 | ABCC9     | 148.613  | 130.25   | 110.7383 | 112.177  | 121.2315 | 117.6272 | 127.1704 | 143.4924 | 115.197  | 118.9824 | 127.7121 | 92.19568 | -0.15085 | 0.521265 | -0.01722 | 0.95295  | -0.20278  | 0.597213 |
| AT3G60164 | AT3G60164 | 1.188904 | 0        | 0        | 2.474493 | 5.962205 | 4.984204 | 1.778607 | 4.31556  | 4.88123  | 0        | 1.330334 | 0        | 1.315603 | 0.038763 | 1.096748 | 0.105276 | -0.09831  | NA       |
| AT3G60170 | AT3G60170 | 0        | 1.784246 | 1.287654 | 0.824831 | 0        | 0.996841 | 0.889303 | 1.07889  | 0        | 0.959536 | 0        | 1.035907 | -0.18152 | NA       | -0.14093 | NA       | -0.11357  | NA       |
| AT3G60176 | AT3G60176 | 0        | 0        | 0        | 0.412416 | 0        | 0        | 0        | 1.07889  | 0        | 0        | 0        | 0        | 0.064603 | NA       | 0.150774 | NA       | 0         | NA       |
| AT3G60180 | UMK1      | 98.67903 | 103.4863 | 117.1765 | 233.0148 | 253.0625 | 222.2955 | 215.2114 | 195.2791 | 229.4178 | 119.942  | 156.9794 | 100.4829 | 1.12158  | 9.12E-10 | 0.976376 | 2.47E-07 | 0.21958   | 0.560065 |
| AT3G60190 | DRP1E     | 917.8338 | 1027.726 | 891.0568 | 1222.812 | 1140.106 | 1317.824 | 1689.677 | 1665.806 | 1199.806 | 965.2928 | 896.6451 | 999.6498 | 0.370711 | 0.01906  | 0.674297 | 7.32E-06 | 0.014553  | 0.973731 |
| AT3G60200 | AT3G60200 | 53.50068 | 39.25341 | 37.34198 | 54.02644 | 47.69764 | 54.82624 | 74.70149 | 67.97007 | 89.81463 | 37.42189 | 42.57069 | 48.68761 | 0.237381 | 0.442098 | 0.788973 | 0.003464 | -0.03175  | 0.967346 |
| AT3G60210 | AT3G60210 | 263.9367 | 264.0684 | 213.7506 | 195.8974 | 276.2489 | 194.384  | 201.8719 | 188.8057 | 351.4486 | 322.404  | 304.6465 | 302.4847 | -0.1467  | 0.617269 | 0.002337 | 0.994546 | 0.314759  | 0.454015 |
| AT3G60220 | ATL4      | 54.68958 | 39.25341 | 42.49259 | 31.756   | 44.38531 | 21.9305  | 22.23259 | 29.13003 | 38.07359 | 50.85539 | 58.53469 | 41.43626 | -0.43545 | 0.214128 | -0.57773 | 0.114864 | 0.119032  | 0.874312 |
| AT3G60238 | AT3G60238 | 0        | 0        | 0        | 0        | 0        | 0        | 0        | 0        | 0        | 0        | 1.330334 | 0        | 0        | NA       | 0        | NA       | 0         | 0.172362 |
| AT3G60240 | E1F4      | 1505.152 | 959.9244 | 847.2766 | 548.9251 | 519.3743 | 692.8043 | 707.8856 | 831.8241 | 590.6288 | 765.7904 | 774.2544 | 788.3249 | -0.88647 | 2.59E-05 | -0.61877 | 0.00544  | -0.49422  | 0.116252 |
| AT3G60245 | RPL37AC   | 1683.488 | 1759.267 | 1816.88  | 2813.911 | 2565.736 | 1785.342 | 1375.752 | 1390.689 | 2365.444 | 2184.863 | 2524.974 | 2079.064 | 0.431979 | 0.066284 | -0.03426 | 0.91461  | 0.355647  | 0.32837  |
| AT3G60250 | CKB3      | 445.839  | 410.3766 | 445.5284 | 495.7235 | 545.2106 | 516.3635 | 506.3137 | 438.0293 | 523.2679 | 459.6176 | 489.5629 | 455.7989 | 0.251711 | 0.055749 | 0.169237 | 0.251573 | 0.104208  | 0.682617 |
| AT3G60260 | AT3G60260 | 136.724  | 137.3869 | 160.9568 | 278.7929 | 325.2714 | 281.1091 | 243.6692 | 226.5669 | 250.8952 | 116.1038 | 117.0694 | 126.3806 | 1.005066 | 5.28E-11 | 0.713661 | 1.16E-05 | -0.27164  | 0.356429 |
| AT3G60270 | AT3G60270 | 0        | 0        | 0        | 0        | 0        | 0        | 0        | 0        | 0        | 0        | 0        | 0        | #N/A     | #N/A     | #N/A     | #N/A     | #N/A      | #N/A     |
| AT3G60280 | UCC3      | 1.188904 | 1.784246 | 0        | 0.412416 | 0        | 0        | 0        | 0.889303 | 0        | 0        | 0        | 0        | -0.40146 | NA       | -0.29287 | NA       | -0.48079  | NA       |
| AT3G60286 | AT3G60286 | 5.94452  | 7.136984 | 11.58889 | 21.03319 | 19.87402 | 8.971567 | 16.00746 | 12.94668 | 19.52492 | 8.635821 | 14.63367 | 6.215439 | 0.864287 | 0.082508 | 0.78461  | 0.143971 | -0.154627 | NA       |
| AT3G60290 | AT3G60290 | 154.5575 | 280.1266 | 236.9284 | 55.6761  | 65.58426 | 65.79149 | 94.26617 | 71.20674 | 46.85981 | 191.9071 | 246.1118 | 214.4327 | -1.75633 | 1.26E-12 | -1.56937 | 5.95E-10 | -0.03354  | 0.961629 |
| AT3G60300 | AT3G60300 | 713.3424 | 833.2429 | 851.1395 | 805.4476 | 753.8878 | 775.5421 | 832.3881 | 896.5575 | 938.1724 | 714.854  | 697.095  | 649.5134 | -0.03495 | 0.822829 | 0.15402  | 0.26391  | -0.21382  | 0.263679 |
| AT3G60310 | AT3G60310 | 122.4571 | 124.8972 | 106.8753 | 80.83345 | 71.54647 | 83.73463 | 95.15547 | 89.54786 | 70.28971 | 122.8206 | 133.0334 | 108.7702 | -0.5686  | 0.005261 | -0.45595 | 0.040749 | 0.040598  | 0.938531 |
| AT3G60318 | AT3G60318 | 2.377808 | 0        | 0        | 0.824831 | 1.324935 | 0.996841 | 0.889303 | 0        | 2.928738 | 1.919071 | 0        | 1.035907 | 0.064288 | 0.937071 | 0.173448 | 0.828181 | 0.06765   | NA       |
| AT3G60320 | AT3G60320 | 1895.113 | 2034.04  | 1739.621 | 834.3167 | 697.578  | 998.8345 | 872.4067 | 1084.284 | 788.806  | 1557.326 | 1630.989 | 1432.659 | -1.14367 | 2.8E-13  | -1.02679 | 8.97E-11 | -0.28919  | 0.275401 |
| AT3G60328 | AT3G60328 | 0        | 0        | 0        | 0        | 0        | 0        | 0        | 0        | 0        | 0        | 0        | 0        | #N/A     | #N/A     | #N/A     | #N/A     | #N/A      | #N/A     |
| AT3G60330 | AHA7      | 4.755616 | 19.62671 | 6.438272 | 13.1973  | 9.274542 | 8.971567 | 12.40255 | 4.88123  | 13.4335  | 11.97301 | 11.39497 | 0        | 0.115835 | 0.959666 | 0.086303 | 0.904422 | 0.279063  | NA       |
| AT3G60340 | AT3G60340 | 601.5854 | 551.332  | 521.5    | 549.75   | 578.9964 | 522.3446 | 614.5087 | 508.1572 | 631.6312 | 579.5595 | 560.0706 | 615.3285 | -0.01973 | 0.913515 | 0.066797 | 0.704922 | 0.066801  | 0.82263  |
| AT3G60350 | ARABID110 | 380.4493 | 410.3766 | 345.0914 | 265.1832 | 266.3118 | 318.989  | 306.8097 | 365.7437 | 316.7266 | 380.9356 | 308.6375 | 379.1414 | -0.40897 | 0.044799 | -0.34327 | 0.116924 | -0.08099  | 0.859259 |
| AT3G60360 | E1D14     | 79.65656 | 67.80135 | 91.42346 | 150.1193 | 119.2441 | 127.5956 | 103.1592 | 120.8357 | 114.2208 | 128.3015 | 125.0514 | 103.5907 | 0.707202 | 0.000562 | 0.46995  | 0.039666 | 0.159093  | 0.091351 |
| AT3G60370 | FKBP20-2  | 318.6263 | 265.8527 | 274.2704 | 265.5956 | 317.9843 | 280.1123 | 340.6032 | 253.5391 | 351.4486 | 363.661  | 317.9498 | 339.2244 | 0.003273 | 0.990364 | 0.134223 | 0.566568 | 0.374761  | 0.183676 |
| AT3G60380 | AT3G60380 | 378.0715 | 340.791  | 378.5704 | 188.4739 | 137.1007 | 210.3334 | 280.9863 | 228.7247 | 166.9381 | 379.0166 | 337.9048 | 388.4649 | -0.10761 | 9.05E-09 | -0.84316 | 4.03E-06 | 0.010053  | 0.985609 |
| AT3G60390 | HAT3      | 161.6909 | 194.4828 | 163.5321 | 134.0351 | 127.8562 | 148.5293 | 100.4913 | 130.5457 | 95.67211 | 132.4159 | 117.0694 | 142.9551 | -0.33    | 0.092199 | -0.65014 | 0.0008   | -0.3825   | 0.190069 |
| AT3G60400 | AT3G60400 | 111.757  | 78.50683 | 84.98519 | 63.09958 | 55.64725 | 80.7441  | 79.14801 | 94.94231 | 52.17128 | 84.43914 | 81.15037 | 76.65708 | -0.46833 | 0.080408 | -0.27977 | 0.36697  | -0.1856   | 0.726049 |
| AT3G60410 | AT3G60410 | 198.547  | 194.4828 | 251.0926 | 313.4358 | 329.2462 | 298.0554 | 280.1306 | 315.0359 | 323.1374 | 228.3695 | 206.2018 | 204.0736 | 0.535073 | 0.000467 | 0.497262 | 0.001828 | -0.01507  | 0.974215 |
| AT3G60420 | AT3G60420 | 134.3461 | 210.541  | 202.1617 | 115.5187 | 123.8439 | 107.5979 | 124.7693 | 116.8438 | 145.1678 | 142.0113 | 147.6671 | 140.8833 | 2.623504 | 5.17E-62 | 2.778419 | 2.67E-69 | -0.32668  | 0.276501 |
| AT3G60440 | AT3G60440 | 253.2625 | 244.4417 | 275.5588 | 200.8464 | 220.6016 | 164.4787 | 170.7463 | 130.5457 | 199.1542 | 32.5385  | 352.5385 | 268.2998 | -0.38577 | 0.056729 | -0.61022 | 0.002429 | 0.825028  | 0.378088 |
| AT3G60450 | AT3G60450 | 115.3237 | 85.64381 | 88.84815 | 287.4537 | 234.5134 | 217.3113 | 178.75   | 148.8868 | 285.0638 | 72.92471 | 82.48071 | 101.5188 | 1.287957 | 2.12E-07 | 1.02323  | 0.000074 | -0.17323  | 0.761125 |
| AT3G60460 | DUO1      | 0        | 0        | 0        | 0        | 0        | 0        | 0        | 0        | 0        | 0        | 0        | 0        | 0        | NA       | 0        | NA       | 0.172362  | NA       |
| AT3G60470 | AT3G60470 | 2.377808 | 3.568492 | 5.150617 | 96.09283 | 94.07035 | 76.75674 | 20.45398 | 26.97225 | 24.40615 | 1.919071 | 0        | 0        | 3.955521 | 6.63E-22 | 2.105133 | 2.88E-06 | -0.92149  | 0.310967 |
| AT3G60480 | AT3G60480 | 20.21137 | 8.92123  | 19.31482 | 44.54088 | 37.09817 | 27.91154 | 40.01866 | 17.26224 | 64.43223 | 33.58375 | 35.91902 | 30.04129 | 0.990052 | 0.019474 | 1.114663 | 0.009874 | 0.845796  | 0.187679 |
| AT3G60490 | ERF035    | 1.037794 | 1.136984 | 2.575309 | 7.835896 | 7.28714  | 10.96525 | 6.225124 | 5.39445  | 7.809968 | 13.4335  | 11.97301 | 16.5745  | 0.101299 | 0.880128 | -0.19199 | 0.779555 | 0.70535   | NA       |
| AT3G60500 | CER7      | 208.0582 | 217.678  | 212.463  | 204.5581 | 200.0651 | 238.2449 | 190.3109 | 181.2535 | 160.1043 | 192.8667 | 182.2558 | 231.0072 | 0.00501  | 0.982467 | -0.25619 | 0.180761 | -0.06786  | 0.862386 |
| AT3G60510 | AT3G60510 | 79.65656 | 74.93833 | 84.98519 | 100.6294 | 62.93439 | 92.70619 | 100.4913 | 89.54786 | 93.71962 | 75.80331 | 63.85603 | 84.94434 | 0.023659 | 0.758298 | 0.23263  | 0.425335 | -0.08669  | 0.88011  |
| AT3G60520 | AT3G60520 | 92.73451 | 121.3287 | 112.0259 | 220.6423 | 159.6546 | 179.4313 | 140.51   | 104.6523 | 135.982  | 117.0633 | 137.0244 | 106.6984 | 0.772778 | 0.000227 | 0.228642 | 0.386756 | 0.143776  | 0.757199 |
| AT3G60530 | GATA4     | 167.6355 | 203.404  | 158.3815 | 195.485  | 228.5512 | 194.384  | 191.2002 | 211.4624 | 217.7029 | 188.069  | 207.5321 | 205.1095 | 0.231389 | 0.001209 | 0.233901 | 0.227164 | 0.187337  | 0.547995 |
| AT3G60540 | AT3G60540 | 17.83356 | 21.41095 | 12.87654 | 178.5759 | 200.7276 | 145.5388 | 108.495  | 89.54786 | 119.102  | 6.716749 | 15.96401 | 9.323159 | 3.156282 | 1.07E-28 | 2.44151  | 0.02E-17 | -0.61877  | 0.319262 |
| AT3G60550 | CYCU2-2   | 7.133244 | 3.568492 | 9.01358  | 11.54764 | 12.58688 | 11.96209 | 8.003731 | 11.86779 | 14.64369 | 3.838143 | 7.982004 | 2.071813 | 0.670984 | 0.220936 | 0.600174 | 0.315475 | -0.44083  | NA       |
| AT3G60560 | AT3G60560 | 0        | 1.784246 | 0        | 0        | 0        | 0        | 0        | 0        | 0        | 0        | 0        | 0        | -0.26756 | NA       | -0.24986 | NA       | -0.06955  | NA       |
| AT3G60565 | AT3G60565 |          |          |          |          |          |          |          |          |          |          |          |          |          |          |          |          |           |          |

|           |            |           |          |          |          |          |          |          |          |          |          |          |          |          |          |          |           |           |          |
|-----------|------------|-----------|----------|----------|----------|----------|----------|----------|----------|----------|----------|----------|----------|----------|----------|----------|-----------|-----------|----------|
| AT3G60990 | AT3G60990  | 2.377808  | 3.568492 | 1.287654 | 2.062078 | 0.662467 | 0.996841 | 0        | 1.07889  | 0        | 0.959536 | 2.660668 | 1.035907 | -0.35588 | 0.636783 | -0.87108 | 0.202221  | -0.28672  | NA       |
| AT3G61010 | AT3G61010  | 689.5643  | 622.7019 | 651.5531 | 526.6547 | 493.5381 | 619.0381 | 568.2649 | 554.5494 | 297.755  | 501.8371 | 488.2326 | 473.4093 | -0.25509 | 0.283095 | -0.45367 | 0.048244  | -0.41196  | 0.211812 |
| AT3G61020 | AT3G61020  | 85.60108  | 80.29107 | 70.82099 | 102.6915 | 113.9444 | 91.70935 | 151.5952 | 105.7312 | 90.79008 | 67.16749 | 105.0964 | 88.05205 | 0.373715 | 0.123758 | -0.20306 | 0.0437046 | -0.18119  | 0.821978 |
| AT3G61028 | AT3G61028  | 2.377808  | 3.568492 | 1.287654 | 1.237247 | 1.987402 | 0.996841 | 1.778607 | 0        | 0.976246 | 1.919071 | 2.660668 | 1.035907 | -0.3339  | 0.6646   | -0.54268 | 0.472511  | -0.15855  | NA       |
| AT3G61030 | AT3G61030  | 26.15589  | 19.62671 | 24.46543 | 14.02213 | 11.92441 | 20.93366 | 32.90423 | 18.34113 | 15.61994 | 27.82653 | 11.97301 | 27.96948 | -0.55575 | 0.213605 | -0.06251 | 0.91437   | -0.03272  | 0.978255 |
| AT3G61035 | AT3G61035  | 0         | 0        | 0        | 0        | 0.824831 | 1.324935 | 1.993682 | 0        | 0        | 1.952492 | 0.959536 | 0        | 0        | 0        | 0        | 0         | 0         | 0        |
| AT3G61040 | CYP76C7    | 0         | 0        | 0        | 0        | 0        | 0        | 0        | 0        | 0        | 0        | 0        | 0        | 0        | 0        | 0        | 0         | 0         | 0        |
| AT3G61050 | NTM2C7YPE4 | 1188.904  | 1215.072 | 1188.505 | 875.5583 | 1032.124 | 868.2483 | 928.4328 | 938.6342 | 1014.32  | 1024.784 | 1081.562 | 1120.851 | -0.36806 | 0.001102 | -0.31512 | 0.007632  | -0.15326  | 0.439153 |
| AT3G61060 | PP2A13     | 388.7716  | 428.219  | 332.2148 | 197.9595 | 178.2037 | 243.2291 | 299.6953 | 331.2192 | 224.5366 | 350.2305 | 415.0642 | 374.9982 | -0.87447 | 1.68E-06 | -0.41345 | 0.041548  | -0.00949  | 0.98677  |
| AT3G61070 | PEX11E     | 278.2035  | 378.2602 | 372.1321 | 388.4955 | 447.1654 | 431.6321 | 450.8769 | 442.3449 | 416.857  | 402.0454 | 396.4395 | 362.5673 | 0.300368 | 0.05639  | 0.350288 | 0.029783  | 0.178065  | 0.52026  |
| AT3G61080 | AT3G61080  | 471.9949  | 558.469  | 513.7741 | 237.139  | 241.8006 | 232.2639 | 386.847  | 325.8248 | 425.6433 | 607.3861 | 610.6233 | 502.4147 | -1.09729 | 1.08E-14 | -0.42851 | 0.005789  | 0.156439  | 0.569492 |
| AT3G61090 | AT3G61090  | 1.188904  | 1.784246 | 10.30123 | 2.062078 | 1.324935 | 0        | 0.889303 | 0        | 0.972646 | 11.3003  | 0        | 9.323159 | -0.84113 | 0.218343 | -1.02213 | 0.138088  | 0.537942  | NA       |
| AT3G61100 | AT3G61100  | 61.82301  | 76.72258 | 79.83457 | 108.4653 | 105.9948 | 81.74094 | 78.25871 | 62.57562 | 98.60085 | 71.09564 | 87.80204 | 91.15977 | 0.441627 | 0.082629 | 0.135727 | 0.675582  | 0.188037  | 0.70827  |
| AT3G61105 | AT3G61105  | 0         | 0        | 0        | 0        | 0        | 0        | 0        | 0        | 0        | 0        | 0        | 0        | #N/A     | #N/A     | #N/A     | #N/A      | #N/A      | #N/A     |
| AT3G61110 | RPS27B     | 475.5616  | 406.8081 | 468.7062 | 762.5564 | 665.1171 | 387.7711 | 412.6368 | 397.0315 | 820.0466 | 565.1665 | 830.1284 | 551.1023 | 0.402391 | 0.211316 | 0.253288 | 0.483192  | 0.493229  | 0.295199 |
| AT3G61111 | AT3G61111  | 0         | 0        | 0        | 0        | 0        | 0        | 1.993682 | 0        | 0        | 0        | 0        | 0        | 0.258438 | NA       | 0        | NA        | 0.144661  | NA       |
| AT3G61113 | URM1-2     | 4.755616  | 1.784246 | 11.58889 | 9.485558 | 12.58688 | 4.984204 | 3.557214 | 5.39445  | 7.809968 | 3.838143 | 5.321336 | 6.215439 | 0.435634 | 0.498563 | -0.12885 | 0.871814  | -0.21176  | NA       |
| AT3G61117 | AT3G61117  | 0         | 0        | 0        | 0        | 0        | 0        | 1.07889  | 0        | 0        | 0        | 0        | 0        | 0.16673  | NA       | 0        | NA        | 0         | NA       |
| AT3G61118 | AT3G61118  | 0         | 0        | 0        | 0        | 0        | 0        | 0        | 0.972646 | 0.959536 | 0        | 0        | 0        | 0.146371 | NA       | 0        | NA        | 0.148275  | NA       |
| AT3G61120 | AGL13      | 1.188904  | 0        | 0        | 0.824831 | 1.324935 | 0.996841 | 1.778607 | 1.07889  | 2.928738 | 3.838143 | 1.330334 | 3.10772  | 0.204681 | 0.794989 | 0.626028 | 0.388224  | 0.920216  | NA       |
| AT3G61130 | GAU1T      | 993.9237  | 961.7086 | 974.7543 | 550.5748 | 522.0242 | 632.9939 | 665.199  | 719.6196 | 475.4318 | 933.6282 | 1109.499 | 997.578  | -0.76943 | 1.28E-06 | -0.64445 | 8.27E-05  | -0.051239 | 0.895902 |
| AT3G61140 | CSN1       | 311.41928 | 253.2807 | 372.1321 | 443.3467 | 410.7297 | 399.7332 | 409.0796 | 403.5048 | 372.926  | 333.9184 | 368.5025 | 334.5978 | 0.277154 | 0.044863 | 0.193486 | 0.210943  | -0.00022  | 0.99927  |
| AT3G61150 | HGD1       | 170.0133  | 174.8561 | 177.6963 | 172.8021 | 142.4305 | 179.4313 | 271.2376 | 337.6926 | 285.0638 | 140.0922 | 160.9704 | 158.4937 | -0.08006 | 0.715065 | 0.75937  | 5.09E-06  | -0.18443  | 0.581855 |
| AT3G61160 | ASK2       | 54.68958  | 67.80135 | 69.53333 | 63.92441 | 56.30972 | 70.7757  | 119.1667 | 119.7568 | 89.81463 | 45.09817 | 82.48071 | 70.44164 | -0.0095  | 0.979204 | 0.749397 | 0.004615  | 0.032092  | 0.965246 |
| AT3G61170 | AT3G61170  | 15.45575  | 17.84246 | 16.73951 | 18.14629 | 11.26194 | 15.94945 | 16.00746 | 15.10446 | 7.809968 | 19.19071 | 14.63367 | 18.64632 | -0.10425 | 0.846087 | -0.30557 | 0.568183  | 0.97505   | NA       |
| AT3G61172 | LCR8       | 0         | 0        | 0        | 0        | 0        | 0        | 0        | 0        | 0        | 0        | 0        | 0        | #N/A     | #N/A     | #N/A     | #N/A      | #N/A      | #N/A     |
| AT3G61175 | LCR52      | 0         | 0        | 0        | 0        | 0        | 0        | 0        | 0        | 0        | 0        | 0        | 0        | #N/A     | #N/A     | #N/A     | #N/A      | #N/A      | #N/A     |
| AT3G61177 | LCR53      | 0         | 0        | 0        | 0        | 0        | 0        | 0        | 0        | 0        | 0        | 0        | 0        | #N/A     | #N/A     | #N/A     | #N/A      | #N/A      | #N/A     |
| AT3G61180 | AT3G61180  | 532.629   | 572.743  | 517.637  | 508.096  | 501.4877 | 504.4014 | 502.4565 | 503.8416 | 517.4104 | 512.392  | 597.32   | 486.8761 | -0.0963  | 0.502377 | -0.08737 | 0.574628  | -0.02451  | 0.939071 |
| AT3G61182 | LCR54      | 0         | 0        | 0        | 0        | 0        | 0.996841 | 0        | 0        | 0        | 0        | 0        | 0        | 0.15625  | NA       | 0        | NA        | 0         | NA       |
| AT3G61185 | AT3G61185  | 1.188904  | 0        | 0        | 1.237247 | 1.324935 | 0.996841 | 3.557214 | 0        | 3.904984 | 0        | 0        | 0        | 0.350244 | 0.613452 | 0.824524 | 0.20151   | -0.27519  | NA       |
| AT3G61190 | BAP1       | 15.45575  | 16.05821 | 19.31482 | 216.9306 | 258.3622 | 349.8911 | 257.0087 | 238.4347 | 380.7359 | 12.47396 | 14.63367 | 17.61041 | 3.699975 | 1.17E-35 | 3.788479 | 2.87E-37  | -0.18436  | 0.828122 |
| AT3G61198 | AT3G61198  | 11.88904  | 14.27397 | 24.46543 | 235.9017 | 260.3496 | 225.286  | 32.01493 | 37.76115 | 26.3564  | 10.55489 | 19.95501 | 14.50269 | 3.633469 | 2.73E-39 | 0.805463 | 0.021138  | -0.20265  | 0.795936 |
| AT3G61200 | AT3G61200  | 200.9248  | 251.5787 | 244.6543 | 332.8194 | 281.5486 | 251.2039 | 224.9938 | 229.8036 | 333.8761 | 284.9821 | 296.6645 | 241.3662 | 0.313614 | 0.148652 | 0.176885 | 0.479899  | -0.235296 | 0.523736 |
| AT3G61210 | AT3G61210  | 450.5946  | 460.3355 | 556.2667 | 257.3473 | 262.9995 | 237.2481 | 237.444  | 208.2258 | 155.2231 | 472.0915 | 489.5629 | 485.8402 | -0.93469 | 3.07E-09 | -1.26236 | 2.92E-15  | -0.02036  | 0.963696 |
| AT3G61220 | SDR1       | 323.3819  | 363.9862 | 413.337  | 379.8347 | 427.2914 | 361.8532 | 377.0647 | 346.3237 | 484.218  | 383.8143 | 336.5745 | 397.7881 | 0.08691  | 0.683511 | 0.132296 | 0.53804   | 0.024997  | 0.957855 |
| AT3G61230 | PLIM2C     | 1.188904  | 0        | 0        | 2.886909 | 1.324935 | 0        | 1.778607 | 1.07889  | 5.952492 | 0        | 2.660668 | 1.035907 | 0.472281 | 0.495235 | 0.476864 | 0.504999  | 0.219159  | NA       |
| AT3G61240 | RH12       | 568.2961  | 565.606  | 561.4173 | 422.726  | 434.5785 | 505.3983 | 48.46179 | 41.266   | 383.6647 | 427.9529 | 445.6619 | 417.4073 | -0.31821 | 0.012853 | -0.44266 | 0.000571  | -0.38991  | 0.019248 |
| AT3G61250 | AIMYB17    | 29.7226   | 16.05821 | 27.04074 | 26.80701 | 38.4231  | 23.92418 | 28.85711 | 22.65669 | 25.3824  | 27.8253  | 25.27635 | 30.01429 | 0.24277  | 0.55086  | 0.035742 | 0.944068  | 0.146353  | 0.858201 |
| AT3G61260 | AT3G61260  | 2329.063  | 2760.229 | 2661.582 | 1391.49  | 1585.284 | 1318.82  | 1836.412 | 1707.883 | 3185.491 | 2878.607 | 4097.429 | 3107.72  | -0.82168 | 0.000223 | -0.1965  | 0.479679  | 0.366703  | 0.31531  |
| AT3G61270 | AT3G61270  | 1.188904  | 0        | 1.287654 | 3.299235 | 3.312336 | 1.993682 | 0        | 0        | 0.972646 | 0        | 1.330334 | 0        | 0.833511 | 0.200468 | -0.32318 | 0.663542  | -0.26726  | NA       |
| AT3G61280 | AT3G61280  | 254.4254  | 360.4177 | 316.763  | 1533.774 | 1413.043 | 1537.128 | 1335.734 | 1170.596 | 1082.657 | 151.6066 | 164.9614 | 133.6319 | 2.240826 | 9.63E-56 | 1.924033 | 7.63E-41  | -1.01975  | 1.67E-08 |
| AT3G61290 | AT3G61290  | 1.188904  | 0        | 0        | 0.412416 | 0        | 0        | 0.889303 | 1.07889  | 0.972646 | 0        | 0        | 0        | -0.19197 | NA       | 0.305447 | 0         | -0.26682  | NA       |
| AT3G61300 | AT3G61300  | 2.377808  | 1.784246 | 2.575309 | 2.886909 | 1.987402 | 1.993682 | 1.778607 | 0        | 0.972646 | 0        | 1.330334 | 2.071813 | 0.072742 | 0.933365 | 0.51796  | 0.494159  | -0.43664  | NA       |
| AT3G61310 | AHL11      | 325.7597  | 258.7157 | 267.8321 | 284.5667 | 308.7097 | 348.8943 | 262.3445 | 224.4091 | 238.204  | 310.8885 | 320.6105 | 289.179  | 0.129339 | 0.479236 | -0.23381 | 0.198874  | 0.101923  | 0.757965 |
| AT3G61320 | AT3G61320  | 164.0687  | 115.976  | 112.0259 | 90.31901 | 118.5816 | 116.6304 | 118.8561 | 119.7568 | 119.1102 | 138.1731 | 125.0514 | 132.596  | -0.09485 | 0.212028 | -0.09485 | 0.736151  | 0.006056  | 0.992275 |
| AT3G61330 | AT3G61330  | 13.07794  | 8.92123  | 7.725926 | 12.78488 | 9.274542 | 15.94945 | 27.56841 | 28.05114 | 20.50117 | 12.47396 | 7.982004 | 12.43088 | 0.245521 | 0.649715 | 1.165299 | 0.009029  | 0.112802  | NA       |
| AT3G61340 | AT3G61340  | 0         | 0        | 1.287654 | 0        | 0        | 0        | 1.778607 | 2.15778  | 0        | 0.995936 | 0        | 0        | -0.31912 | NA       | 0.397008 | NA        | -0.05619  | NA       |
| AT3G61350 | SKIP4      | 40.42273  | 71.36984 | 52.79383 | 44.54088 | 54.32232 | 56.81992 | 41.79726 | 44.23449 | 57.59851 | 54.69353 | 53.21336 | 55.93895 | -0.06421 | 0.856614 | -0.15974 | 0.65728   | 0.022957  | 0.977006 |
| AT3G61360 | AT3G61360  | 39.23383  | 48.17644 | 45.0679  | 47.84021 | 41.73544 | 41.86731 | 39.12935 | 38.84004 | 36.1211  | 54.69353 | 42.57069 | 39.36445 | 0.010922 | 0.976859 | -0.19382 | 0.893927  | 0.062026  | 0.933388 |
| AT3G61370 | AT3G61370  | 43.98945  | 39.25341 | 48.3284  | 73.82239 | 80.82101 | 53.8294  | 67.58706 | 57.18117 | 116.7133 | 46.05771 | 62.5257  | 43.50807 | 0.843306 | 0.009504 | 0.130002 | 0.001613  | 0.397079  | 0.503914 |
| AT3G61380 | AT3G61380  | 128.4016  | 103.4863 | 113.3136 | 60.62509 | 68.23413 | 89.71567 | 80.03731 | 96.0212  | 67.36097 | 103.6298 | 123.7211 | 119.1293 | -0.67042 | 0.002779 | -0.49729 | 0.041589  | -0.00539  | 0.99299  |
| AT3G61389 | AT3G61389  | 0         | 0        | 0        | 0        | 0        | 0        | 0        | 0        | 0        | 1.330334 | 0        | 0        | 0        | NA       | 0        | NA        | 0         | NA       |
| AT3G61390 | PUB36      | 1.188904  | 0        | 0        | 32.58083 | 33.78583 | 27.91154 | 104.0485 | 101.4157 | 92.74337 | 2.878607 | 0        | 4.143626 | 3.344364 | 7.42E    |          |           |           |          |

|           |           |          |          |           |          |          |          |          |          |          |          |          |          |          |          |          |          |          |          |
|-----------|-----------|----------|----------|-----------|----------|----------|----------|----------|----------|----------|----------|----------|----------|----------|----------|----------|----------|----------|----------|
| AT3G61820 | AT3G61820 | 546.8958 | 297.9691 | 350.242   | 306.8372 | 289.4982 | 284.0996 | 205.4291 | 217.9358 | 254.8002 | 300.3347 | 242.1208 | 202.0018 | -0.43058 | 0.068317 | -0.79542 | 0.000469 | -0.66396 | 0.025817 |
| AT3G61825 | AT3G61825 | 0        | 0        | 0         | 0        | 0        | 0        | 0        | 0        | 0        | 0        | 0        | 0        | #N/A     | #N/A     | #N/A     | #N/A     | #N/A     | #N/A     |
| AT3G61826 | AT3G61826 | 0        | 0        | 0         | 0.412416 | 0        | 0        | 0        | 0        | 0        | 0        | 0        | 0        | 0.095918 | NA       | 0        | NA       | 0        | NA       |
| AT3G61827 | AT3G61827 | 0        | 0        | 0         | 0        | 0        | 0        | 0        | 0        | 0        | 0        | 0        | 0        | #N/A     | #N/A     | #N/A     | #N/A     | #N/A     | #N/A     |
| AT3G61829 | AT3G61829 | 0        | 0        | 0         | 0        | 0        | 0        | 0        | 0        | 0        | 0        | 0        | 0        | #N/A     | #N/A     | #N/A     | #N/A     | #N/A     | #N/A     |
| AT3G61830 | ARF18     | 240.1586 | 162.3664 | 206.0247  | 111.3522 | 125.8688 | 109.6525 | 123.6132 | 128.3879 | 95.67211 | 167.9187 | 139.6851 | 184.3914 | -0.79878 | 4.566-05 | -0.79622 | 8.98E-05 | -0.30377 | 0.366371 |
| AT3G61840 | AT3G61840 | 14.26685 | 32.11643 | 18.02716  | 25.98218 | 30.47349 | 23.92418 | 13.33995 | 15.10446 | 23.42299 | 33.58375 | 29.26735 | 29.00336 | 0.344155 | 0.410745 | -0.23531 | 0.63577  | 0.516826 | 0.413872 |
| AT3G61850 | DOF3.7    | 5.123262 | 67.80135 | 72.108616 | 67.63615 | 68.8966  | 75.7599  | 104.0485 | 99.25787 | 59.55101 | 72.92471 | 77.15937 | 72.51348 | -0.1589  | 0.599665 | -0.14421 | 0.659405 | -0.08839 | 0.882905 |
| AT3G61860 | RS31      | 443.4612 | 453.1985 | 373.4198  | 788.951  | 747.2631 | 729.6874 | 553.1468 | 579.3639 | 629.6787 | 393.4096 | 435.0192 | 399.8599 | 0.831219 | 4.3E-12  | 0.469684 | 0.000286 | -0.0474  | 0.879579 |
| AT3G61870 | AT3G61870 | 1734.611 | 1557.647 | 1616.006  | 854.9375 | 898.9681 | 772.5516 | 1169.434 | 1220.225 | 1565.899 | 1914.274 | 1720.122 | 1762.077 | -0.94495 | 7.46E-13 | -0.30812 | 0.039594 | 0.134824 | 0.60756  |
| AT3G61880 | CYP78A9   | 85.60108 | 108.839  | 95.28642  | 49.48987 | 48.36011 | 43.86099 | 22.23259 | 14.02557 | 26.35864 | 84.43914 | 82.48071 | 59.04667 | -0.97137 | 5.59E-05 | -2.05711 | 1.49E-14 | -0.33736 | 0.4308   |
| AT3G61890 | ATHB-12   | 154.5575 | 144.5239 | 190.5728  | 170.3276 | 225.9013 | 207.3429 | 170.7463 | 135.9401 | 163.0331 | 189.9881 | 224.8264 | 160.5655 | 0.283295 | 0.195691 | -0.06116 | 0.831565 | 0.21604  | 0.56626  |
| AT3G61897 | MIR1668   | 0        | 0        | 0         | 0        | 0        | 0        | 0        | 0        | 0        | 0        | 0        | 0        | 0.26262  | NA       | 0.26262  | NA       | 0.150298 | NA       |
| AT3G61898 | AT3G61898 | 29.7226  | 17.84246 | 23.17778  | 18.14629 | 24.51129 | 19.93682 | 12.45025 | 9.710009 | 12.6912  | 31.66468 | 27.93701 | 17.61041 | -0.18511 | 0.687592 | -0.91089 | 0.032588 | 0.094154 | 0.920242 |
| AT3G61900 | AT3G61900 | 14.26685 | 14.27397 | 18.02716  | 22.68286 | 15.89921 | 11.96209 | 18.67537 | 7.55223  | 13.66742 | 24.94793 | 25.27635 | 19.68222 | 0.138513 | 0.795705 | -0.18233 | 0.753912 | 0.507948 | 0.949489 |
| AT3G61910 | NAC066    | 0        | 0        | 0         | 0        | 0        | 0        | 0        | 0        | 0        | 0        | 0        | 0        | 0.262373 | NA       | 0.262373 | NA       | 0.143228 | NA       |
| AT3G61920 | AT3G61920 | 10.70014 | 5.352738 | 9.01358   | 4.948987 | 1.324935 | 4.984204 | 2.66791  | 2.15778  | 10.73871 | 17.27164 | 17.29434 | 14.50269 | -0.872   | 0.135415 | -0.52457 | 0.430332 | 0.767728 | NA       |
| AT3G61930 | AT3G61930 | 0        | 0        | 0         | 5.773818 | 3.312336 | 3.987363 | 3.557214 | 7.55223  | 7.809968 | 0        | 1.330334 | 0        | 1.549976 | 0.102616 | 1.874283 | 0.002539 | 0.097227 | NA       |
| AT3G61940 | MTPA1     | 1.188904 | 0        | 0         | 3.862963 | 0        | 0        | 0        | 0        | 1.07889  | 0        | 2.878607 | 1.330334 | 0.10772  | 0.104463 | -0.65357 | 0.327043 | 0.274831 | NA       |
| AT3G61947 | AT3G61947 | 0        | 0        | 0         | 0        | 0        | 0        | 0        | 0        | 0        | 0        | 0        | 0        | 0.959536 | 0        | 0        | 0        | 0        | NA       |
| AT3G61950 | BHLH67    | 84.41218 | 71.36984 | 97.86173  | 17.73387 | 20.53649 | 15.94945 | 32.01493 | 38.84004 | 28.31113 | 86.35821 | 97.11438 | 80.80071 | -2.11063 | 4.26E-17 | -1.39091 | 2.6E-07  | 0.045409 | 0.942666 |
| AT3G61960 | AT3G61960 | 330.5153 | 347.928  | 392.7346  | 604.6012 | 551.8352 | 592.1234 | 555.8147 | 575.0483 | 432.477  | 415.4789 | 328.5925 | 364.6391 | 0.695273 | 5.9E-06  | 0.535417 | 0.000893 | 0.051597 | 0.894073 |
| AT3G61962 | AT3G61962 | 0        | 0        | 0         | 0        | 0        | 0        | 0        | 0        | 0        | 0        | 0        | 0        | #N/A     | #N/A     | #N/A     | #N/A     | #N/A     | #N/A     |
| AT3G61970 | NGA2      | 82.03437 | 126.6815 | 95.28642  | 53.20161 | 46.37271 | 49.84204 | 53.35821 | 61.49673 | 67.36097 | 96.9131  | 117.0694 | 100.4829 | -0.96338 | 1.61E-05 | -0.69448 | 0.003793 | 0.062308 | 0.910358 |
| AT3G61980 | AT3G61980 | 42.80054 | 76.72258 | 55.36914  | 98.15491 | 121.2315 | 92.70619 | 88.04104 | 70.12785 | 151.3181 | 63.32935 | 83.81104 | 75.62118 | 0.803535 | 0.008291 | 0.791007 | 0.012253 | 0.33755  | 0.551316 |
| AT3G61990 | OMTF3     | 45.17835 | 30.33218 | 32.19136  | 57.73818 | 72.20893 | 78.75042 | 86.26244 | 79.83786 | 80.05217 | 27.82653 | 43.90102 | 30.04129 | 0.867518 | 0.001573 | 1.113487 | 0.000047 | -0.1207  | 0.863606 |
| AT3G62000 | AT3G62000 | 109.3792 | 153.4452 | 139.0667  | 129.9109 | 139.1181 | 117.6272 | 96.93408 | 105.7312 | 105.4346 | 130.4968 | 200.8804 | 128.4524 | -0.04003 | 0.892644 | -0.36194 | 0.151059 | 0.187323 | 0.662398 |
| AT3G62010 | AT3G62010 | 1075.958 | 876.0648 | 776.4556  | 511.3953 | 490.2258 | 577.1708 | 562.0398 | 682.9373 | 406.1183 | 841.5127 | 695.7647 | 854.6229 | -0.7709  | 6.96E-05 | -0.70717 | 0.000374 | -0.18469 | 0.623458 |
| AT3G62020 | GLP10     | 33.28931 | 30.33218 | 28.3284   | 32.16841 | 13.91181 | 14.95261 | 10.67164 | 23.73558 | 11.71495 | 48.93632 | 43.90102 | 31.0772  | -0.48121 | 0.279004 | -0.88241 | 0.04571  | 0.38989  | 0.594257 |
| AT3G62030 | CYP20-3   | 4621.27  | 5224.272 | 5543.352  | 3851.137 | 3615.746 | 3445.082 | 4237.531 | 3907.739 | 5755.946 | 6184.207 | 5378.54  | 7247.202 | -0.486   | 0.004988 | -0.14368 | 0.497095 | 0.2843   | 0.304315 |
| AT3G62040 | AT3G62040 | 5.94452  | 5.352738 | 2.575309  | 3.71174  | 5.962205 | 0.996841 | 8.003731 | 2.15778  | 2.928738 | 7.676285 | 9.312338 | 4.143626 | -0.21602 | 0.776393 | -0.0333  | 0.982929 | 0.416265 | NA       |
| AT3G62050 | AT3G62050 | 8.322328 | 5.352738 | 11.58889  | 8.248311 | 13.24935 | 8.971567 | 5.335821 | 7.55223  | 9.76246  | 6.635821 | 9.312338 | 4.143626 | 0.196802 | 0.575728 | -0.15546 | 0.829808 | -0.18704 | NA       |
| AT3G62060 | PAE6      | 67.76752 | 89.2123  | 86.27284  | 77.12171 | 82.80841 | 72.76938 | 70.25498 | 65.81229 | 51.74104 | 59.49121 | 89.13238 | 68.36983 | -0.04739 | 0.879989 | -0.3473  | 0.213182 | -0.16262 | 0.746536 |
| AT3G62070 | AT3G62070 | 41.61164 | 53.52738 | 57.94445  | 33.81808 | 27.82363 | 18.93997 | 25.7898  | 28.05114 | 38.07359 | 95.95356 | 87.80204 | 74.58527 | -0.81913 | 0.005698 | -0.68332 | 0.033757 | 0.730429 | 0.058687 |
| AT3G62080 | AT3G62080 | 115.3237 | 119.5445 | 131.3407  | 105.166  | 103.3449 | 126.5988 | 142.2886 | 137.019  | 100.5533 | 121.861  | 117.0694 | 108.7702 | -0.13633 | 0.570729 | 0.051598 | 0.857016 | -0.07296 | 0.879636 |
| AT3G62090 | PIF6      | 59.4452  | 48.17464 | 39.91728  | 35.05532 | 32.4609  | 40.87047 | 44.46517 | 36.68226 | 21.47741 | 46.05771 | 49.22236 | 51.79533 | -0.43384 | 0.178411 | -0.49006 | 0.154889 | -0.00863 | 0.992275 |
| AT3G62097 | AT3G62097 | 0        | 0        | 0         | 0        | 0        | 0        | 0.889303 | 0        | 0        | 0        | 0        | 0        | NA       | NA       | 0.160764 | NA       | 0.163234 | NA       |
| AT3G62100 | IAA30     | 3.566712 | 1.784246 | 9.01358   | 6.186234 | 5.299738 | 2.990522 | 2.66791  | 3.23667  | 6.833722 | 5.757214 | 6.65167  | 5.179533 | 0.011468 | 0.989055 | -0.15606 | 0.848936 | 0.163234 | NA       |
| AT3G62110 | AT3G62110 | 569.485  | 503.1574 | 529.2259  | 249.099  | 288.8357 | 271.1407 | 263.2338 | 268.6436 | 289.9451 | 568.0511 | 457.6349 | 613.2567 | -0.97631 | 3.62E-12 | -0.95071 | 1.47E-11 | 0.033984 | 0.927445 |
| AT3G62120 | AT3G62120 | 1477.808 | 1423.828 | 1443.461  | 1300.759 | 1408.405 | 1300.877 | 1142.755 | 1345.376 | 1682.072 | 1307.847 | 1238.541 | 1354.962 | -0.11436 | 0.506861 | -0.05903 | 0.765594 | -0.15308 | 0.870146 |
| AT3G62130 | LCD       | 274.6368 | 296.1848 | 306.4617  | 358.3891 | 323.284  | 351.8848 | 351.2749 | 333.377  | 295.8025 | 299.3751 | 372.4935 | 265.1921 | 0.234512 | 0.178084 | 0.195222 | 0.146949 | 0.088729 | 0.502435 |
| AT3G62140 | AT3G62140 | 109.3792 | 64.23286 | 105.5877  | 153.831  | 164.9544 | 147.5324 | 120.9453 | 131.6246 | 227.4653 | 102.6703 | 141.0154 | 116.0215 | 0.688192 | 0.011626 | 0.726408 | 0.009433 | 0.324285 | 0.509711 |
| AT3G62150 | ABC821    | 111.757  | 133.8185 | 74.68395  | 92.7935  | 70.884   | 134.7535 | 249.8943 | 299.9314 | 170.843  | 60.60099 | 74.4987  | 111.8779 | -0.10088 | 0.793142 | 1.1126   | 0.000125 | -0.23463 | 0.695977 |
| AT3G62160 | AT3G62160 | 13.07794 | 26.76369 | 23.17778  | 9.485558 | 11.26194 | 8.971567 | 8.003731 | 7.55223  | 8.786214 | 13.4335  | 14.63367 | 19.68222 | -0.91394 | 0.034616 | -1.13893 | 0.013666 | -0.3201  | NA       |
| AT3G62170 | VDH2      | 2.377808 | 14.27397 | 0         | 0        | 0        | 0        | 0        | 0        | 0        | 0        | 0        | 0        | -1.72101 | 0.004834 | -1.39477 | 0.028505 | -0.43131 | NA       |
| AT3G62180 | AT3G62180 | 1.188904 | 0        | 0         | 0.412416 | 0        | 0        | 0.996841 | 1.778607 | 0        | 0        | 0        | 0        | -0.00504 | NA       | 0.091237 | NA       | -0.03984 | NA       |
| AT3G62190 | AT3G62190 | 248.4809 | 235.5205 | 289.7222  | 426.8501 | 460.4148 | 317.9922 | 383.2898 | 265.4069 | 374.8785 | 351.19   | 271.3881 | 313.8797 | 0.623675 | 0.002053 | 0.391435 | 0.079377 | 0.267513 | 0.456833 |
| AT3G62200 | AT3G62200 | 121.2682 | 80.29107 | 79.83457  | 74.64722 | 56.97129 | 98.68724 | 70.25498 | 88.46897 | 42.95482 | 52.77446 | 66.5167  | 63.1903  | -0.29007 | 0.388567 | -0.4623  | 0.171091 | -0.57996 | 0.196471 |
| AT3G62210 | EDA32     | 0        | 1.784246 | 0         | 0        | 18.14629 | 13.24935 | 11.96209 | 15.11816 | 9.710009 | 8.786214 | 0        | 0        | 2.622434 | 2.69E-06 | 2.254175 | 0.000101 | -0.35716 | NA       |
| AT3G62220 | AT3G62220 | 141.4796 | 189.1301 | 140.3543  | 165.3786 | 164.9544 | 179.4313 | 141.3993 | 132.7035 | 112.2683 | 125.6992 | 123.7211 | 149.1705 | 0.122848 | 0.579072 | -0.26364 | 0.229181 | -0.2183  | 0.531312 |
| AT3G62230 | AT3G62230 | 0        | 0        | 0         | 0        | 0        | 0        | 0        | 0        | 0        | 0        | 0        | 0        | 0.16673  | NA       | 0        | NA       | 0        | NA       |
| AT3G62240 | AT3G62240 | 351.9156 | 324.7328 | 302.5988  | 280.0302 | 246.4378 | 283.1028 | 295.2488 | 356.0337 | 215.7504 | 312.8086 | 313.9588 | 265.1921 | -0.26926 | 0.189051 | -0.1737  | 0.453237 | -0.13299 | 0.73288  |
| AT3G62245 | AT3G62245 | 0        | 0        | 0         | 0        | 0        | 0        | 0        | 0        | 0        | 0        | 0        | 0        | #N/A     | #N/A     | #N/A     | #N/A     | #N/A     | #N/A     |
| AT3G62250 | RP527AC   | 1824.968 | 1841.342 | 1959.81   | 2620.901 | 2391.507 | 1978.729 | 1574.956 | 1589.205 | 2716.893 | 1        |          |          |          |          |          |          |          |          |



|           |           |          |          |          |          |          |          |          |          |          |          |          |           |           |          |          |          |          |          |
|-----------|-----------|----------|----------|----------|----------|----------|----------|----------|----------|----------|----------|----------|-----------|-----------|----------|----------|----------|----------|----------|
| AT3G62690 | ATL5      | 85.60108 | 62.44861 | 66.95803 | 58.97543 | 56.97219 | 51.83572 | 83.59453 | 103.5734 | 106.4108 | 46.05771 | 61.19536 | 39.36445  | -0.34765  | 0.189128 | 0.419736 | 0.114145 | -0.55538 | 0.146425 |
| AT3G62700 | ABCC14    | 1897.491 | 1548.726 | 1247.377 | 527.4795 | 488.2384 | 564.2119 | 951.5547 | 1152.254 | 814.1892 | 1363.5   | 1343.637 | 1341.499  | -1.53986  | 5.47E-21 | -0.67282 | 0.000112 | -0.20939 | 0.505619 |
| AT3G62710 | AT3G62710 | 0        | 0        | 0        | 0.412416 | 0        | 0        | 0.889303 | 0        | 0.976246 | 0.959536 | 0        | 0         | 0.059626  | NA       | 0.334854 | NA       | 0.176222 | NA       |
| AT3G62720 | XXT1      | 140.2907 | 180.2088 | 133.9161 | 153.831  | 139.1181 | 180.4282 | 198.3147 | 272.9592 | 218.6791 | 117.0633 | 81.15037 | 109.8061  | 0.061259  | 0.824881 | 0.593998 | 0.005902 | -0.52168 | 0.098222 |
| AT3G62725 | AT3G62725 | 7.133244 | 21.41095 | 19.31482 | 9.073143 | 9.937009 | 11.96209 | 8.893035 | 9.710009 | 3.694984 | 13.4335  | 3.991002 | 9.323159  | -0.49894  | 0.361836 | -0.84454 | 0.128784 | -0.61581 | NA       |
| AT3G62730 | AT3G62730 | 0        | 1.784246 | 0        | 1.496662 | 0        | 1.324935 | 0        | 0        | 0        | 0        | 0        | 0         | 0.292689  | NA       | -0.27367 | NA       | -0.26232 | NA       |
| AT3G62735 | AT3G62735 | 0        | 0        | 0        | 0        | 0        | 0        | 0.889303 | 0        | 0        | 0        | 0        | 0         | 0         | NA       | 0.160764 | NA       | 0        | NA       |
| AT3G62740 | BGLU7     | 28.53369 | 30.33218 | 41.20494 | 21.03319 | 19.21155 | 13.95577 | 20.45398 | 12.94668 | 16.59618 | 39.34096 | 46.56169 | 40.40035  | -0.78481  | 0.021424 | -0.90369 | 0.013629 | 0.309191 | 0.612836 |
| AT3G62750 | BGLU8     | 1285.205 | 1488.061 | 1496.254 | 759.6695 | 736.0011 | 810.4316 | 1430.889 | 1226.698 | 1066.061 | 1526.621 | 1332.995 | 1719.605  | -0.87545  | 9.69E-10 | -0.19317 | 0.268736 | 0.101282 | 0.744238 |
| AT3G62760 | GSTF13    | 0        | 0        | 0        | 0.824831 | 0        | 0        | 0        | 0        | 0        | 0        | 0        | 0         | 0         | 0.173038 | NA       | 0        | NA       | 0        |
| AT3G62770 | ATG18A    | 242.5364 | 226.5992 | 195.7235 | 272.6067 | 263.662  | 253.1976 | 264.1231 | 272.9592 | 270.4201 | 186.1499 | 206.2018 | 164.7091  | 0.247674  | 0.126558 | 0.275841 | 0.104169 | -0.25619 | 0.323403 |
| AT3G62780 | AT3G62780 | 10.70014 | 12.48972 | 25.75309 | 48.25262 | 40.4105  | 39.87363 | 13.33955 | 20.49891 | 20.50117 | 8.635821 | 10.64267 | 11.39497  | 1.277835  | 0.000583 | 0.108135 | 0.848492 | -0.58645 | 0.425471 |
| AT3G62790 | AT3G62790 | 342.4043 | 330.0855 | 374.7074 | 536.9651 | 604.1702 | 418.6731 | 386.847  | 284.8269 | 613.0825 | 381.8952 | 525.4819 | 508.6301  | 0.551269  | 0.033405 | 0.281856 | 0.344926 | 0.414377 | 0.308194 |
| AT3G62800 | DBR4      | 122.4571 | 144.5239 | 130.0531 | 131.5606 | 153.0299 | 134.5735 | 135.1741 | 134.8612 | 123.007  | 148.728  | 151.6581 | 147.0987  | 0.083866  | 0.699778 | -0.00585 | 0.981782 | 0.176782 | 0.596108 |
| AT3G62810 | AT3G62810 | 97.49012 | 115.976  | 97.86173 | 201.2588 | 145.7428 | 153.5135 | 107.6057 | 99.25787 | 217.7029 | 130.4968 | 190.2378 | 103.5907  | 0.649027  | 0.039893 | 0.421899 | 0.229181 | 0.41448  | 0.432844 |
| AT3G62820 | AT3G62820 | 141.4796 | 262.2842 | 209.8877 | 95.268   | 91.42048 | 66.78833 | 92.48756 | 102.4945 | 137.6507 | 204.3811 | 172.9434 | 177.14    | -1.19908  | 4.07E-07 | -0.83752 | 0.000769 | -0.12776 | 0.810026 |
| AT3G62830 | UXS2      | 411.3608 | 390.7499 | 419.7753 | 493.249  | 429.2788 | 532.313  | 417.0833 | 442.3449 | 449.6732 | 534.0686 | 351.2082 | 287.982   | 0.244442  | 0.105105 | 0.095166 | 0.603959 | -0.29782 | 0.180516 |
| AT3G62840 | AT3G62840 | 538.5735 | 606.6437 | 667.0049 | 997.2209 | 1180.517 | 805.4473 | 839.5025 | 636.5451 | 1245.69  | 635.2126 | 710.3983 | 703.3805  | 0.695628  | 0.002126 | 0.567041 | 0.017127 | 0.170664 | 0.709667 |
| AT3G62850 | AT3G62850 | 0        | 0        | 0        | 0.412416 | 0.662467 | 0        | 0        | 0        | 0        | 0        | 0        | 0         | 0.196313  | NA       | 0        | NA       | 0        | 0        |
| AT3G62860 | AT3G62860 | 54.68958 | 42.8219  | 60.51975 | 65.16166 | 56.97219 | 47.84836 | 64.02985 | 60.41784 | 64.43224 | 71.00564 | 83.81104 | 66.29802  | 0.10437   | 0.741933 | 0.229779 | 0.458632 | 0.439888 | 0.274581 |
| AT3G62870 | RPL7AB    | 2010.347 | 2212.465 | 2168.41  | 2202.299 | 2060.273 | 1906.956 | 1710.131 | 1741.328 | 1976.898 | 1654.239 | 1396.851 | 2214.768  | -0.04906  | 0.822983 | -0.23096 | 0.227323 | -0.27308 | 0.310967 |
| AT3G62880 | OE1P64    | 60.6341  | 67.80135 | 64.38272 | 136.5096 | 140.4431 | 99.68408 | 88.93035 | 88.46897 | 116.1733 | 74.84378 | 91.79304 | 41.43626  | 0.930526  | 0.000546 | 0.577045 | 0.053991 | 0.094244 | 0.888867 |
| AT3G62890 | PCMP-H82  | 7.133244 | 12.48972 | 12.87654 | 20.62078 | 25.17376 | 18.93997 | 19.56468 | 16.18335 | 23.4299  | 15.35257 | 14.63367 | 24.86176  | 0.879008  | 0.039956 | 0.755539 | 0.106477 | 0.661345 | 0.348955 |
| AT3G62900 | AT3G62900 | 511.2287 | 437.1403 | 404.3235 | 320.0345 | 294.7979 | 377.8027 | 409.0796 | 482.2638 | 359.2585 | 396.2882 | 329.9228 | 395.7163  | -0.44411  | 0.010678 | -0.11371 | 0.603644 | -0.26344 | 0.356638 |
| AT3G62907 | AT3G62907 | #N/A     | #N/A     | #N/A     | #N/A     | #N/A     | #N/A     | #N/A     | #N/A     | #N/A     | #N/A     | #N/A     | #N/A      | #N/A      | #N/A     | #N/A     | #N/A     | #N/A     | #N/A     |
| AT3G62910 | APG3      | 493.3951 | 635.1916 | 643.8272 | 510.5705 | 456.44   | 492.4393 | 584.2724 | 618.2039 | 455.9069 | 783.9406 | 784.897  | 678.5188  | -0.27233  | 0.11802  | -0.09202 | 0.665606 | 0.338926 | 0.165607 |
| AT3G62920 | AT3G62920 | 15.45575 | 8.92123  | 16.73951 | 16.73951 | 20.53649 | 11.96209 | 18.67537 | 8.63112  | 34.16861 | 6.716749 | 19.95501 | 17.61041  | 0.247987  | 0.673835 | 0.462082 | 0.423897 | 0.042059 | 0.976392 |
| AT3G62930 | GRX56     | 16.64466 | 28.54794 | 16.73951 | 18.5587  | 14.57428 | 21.9305  | 13.33955 | 8.63112  | 15.54867 | 22.06932 | 18.62468 | 14.50269  | -0.1265   | 0.805884 | -0.49355 | 0.310201 | -0.10953 | 0.913471 |
| AT3G62940 | AT3G62940 | 312.6817 | 355.065  | 332.2148 | 390.1451 | 352.4326 | 333.9417 | 312.1455 | 357.1126 | 327.0424 | 382.8547 | 388.4575 | 349.1005  | -0.115424 | 0.475226 | -0.00266 | 0.989209 | 0.165237 | 0.512394 |
| AT3G62950 | GRXC11    | 84.41218 | 107.0548 | 97.86173 | 62.27475 | 46.37271 | 51.83572 | 52.46891 | 40.99782 | 68.33722 | 48.43914 | 91.79304 | 89.08796  | -0.79507  | 0.000768 | -0.79088 | 0.001548 | -0.11288 | 0.836113 |
| AT3G62960 | GRXC14    | 0        | 0        | 0        | 7.42348  | 5.299738 | 1.993682 | 8.003731 | 2.15778  | 9.76246  | 0        | 0        | 0.1035907 | 1.596196  | 0.010294 | 1.837088 | 0.003271 | 0.079795 | NA       |
| AT3G62970 | AT3G62970 | 185.469  | 196.2671 | 184.1346 | 224.3541 | 234.5134 | 205.3492 | 191.2002 | 200.6735 | 169.8686 | 249.4793 | 172.9434 | 205.1095  | 0.232818  | 0.222111 | -0.00078 | 0.97269  | 0.156712 | 0.646732 |
| AT3G62980 | TIR1      | 1197.226 | 1275.736 | 1116.396 | 750.1839 | 638.6185 | 741.6495 | 680.3172 | 850.1653 | 609.1775 | 954.7379 | 854.0744 | 845.2997  | -0.74053  | 2.36E-07 | -0.73545 | 3.92E-07 | -0.42745 | 0.031113 |
| AT3G62988 | AT3G62988 | 1.188904 | 0        | 0        | 0        | 0        | 0        | 0        | 0        | 0        | 0        | 0        | 0         | -0.2184   | NA       | -0.20558 | NA       | -0.19918 | NA       |
| AT3G62990 | AT3G62990 | 1.188904 | 0        | 0        | 0.412416 | 0        | 0        | 0        | 0        | 0        | 0        | 0        | 0         | -0.132    | NA       | -0.21801 | NA       | -0.02578 | NA       |
| AT3G63000 | NPL41     | 445.839  | 437.1403 | 431.3642 | 416.9521 | 387.5434 | 361.8532 | 440.2052 | 432.6349 | 427.5957 | 431.791  | 356.5295 | 443.368   | -0.16542  | 0.259853 | -0.01522 | 0.937233 | -0.08826 | 0.752829 |
| AT3G63003 | AT3G63003 | 0        | 0        | 0        | 0        | 0        | 0        | 0        | 0        | 0        | 0        | 0        | 0         | #N/A      | #N/A     | #N/A     | #N/A     | #N/A     | #N/A     |
| AT3G63006 | AT3G63006 | 0        | 0        | 0        | 0        | 0        | 0        | 0        | 0        | 0        | 0        | 0        | 0         | #N/A      | #N/A     | #N/A     | #N/A     | #N/A     | #N/A     |
| AT3G63010 | GID1B     | 36.85602 | 30.33218 | 24.46543 | 106.8156 | 102.02   | 90.71251 | 103.1592 | 107.889  | 109.3396 | 18.23118 | 22.61568 | 30.04129  | 1.631647  | 5.08E-11 | 1.714041 | 9.29E-12 | -0.35331 | 0.527211 |
| AT3G63020 | AT3G63020 | 0        | 0        | 0        | 0.412416 | 0        | 0        | 0        | 0        | 0        | 0        | 0        | 0         | 0.095918  | NA       | 0        | NA       | 0        | NA       |
| AT3G63030 | MBD4      | 46.36725 | 64.23286 | 57.94445 | 157.5427 | 143.0929 | 136.5672 | 73.81219 | 60.41784 | 118.1258 | 58.53167 | 54.54369 | 77.69299  | 1.326237  | 2.8E-07  | 0.562266 | 0.061506 | 0.182086 | 0.759637 |
| AT3G63040 | AT3G63040 | 1.188904 | 1.784246 | 1.287654 | 0        | 0        | 0        | 0        | 0        | 0        | 0        | 0        | 0         | -0.79077  | NA       | -0.74528 | NA       | -0.73361 | NA       |
| AT3G63050 | AT3G63050 | 4.755616 | 7.136984 | 2.575309 | 4.948987 | 1.987402 | 2.990522 | 6.225124 | 6.47334  | 8.786214 | 7.676285 | 9.312338 | 6.215499  | -0.32558  | 0.683088 | 0.450767 | 0.515257 | 0.523879 | NA       |
| AT3G63052 | AT3G63052 | 0        | 0        | 0        | 0        | 0        | 0        | 0.889303 | 0        | 0        | 0        | 0        | 0         | 0.160764  | NA       | 0.160764 | NA       | 0        | NA       |
| AT3G63060 | EDL3      | 2.377808 | 8.92123  | 1.287654 | 14.43455 | 9.937009 | 11.96209 | 15.18167 | 7.55223  | 6.833722 | 0        | 1.330334 | 2.071813  | 1.254112  | 0.028626 | 0.985648 | 0.11511  | -0.82888 | NA       |
| AT3G63070 | AT3G63070 | 2953.261 | 472.8252 | 464.8432 | 330.7573 | 219.9391 | 384.7805 | 394.8505 | 480.106  | 228.4416 | 446.1841 | 345.8868 | 377.07    | -0.68087  | 0.010433 | -0.45232 | 0.119656 | -0.37081 | 0.404582 |
| AT3G63080 | GPX5      | 240.1586 | 285.4794 | 287.1469 | 487.8876 | 577.6715 | 462.5341 | 305.0311 | 321.5092 | 483.2418 | 182.3118 | 210.1928 | 231.0072  | 0.89031   | 5.05E-06 | 0.439124 | 0.046667 | -0.36984 | 0.263611 |
| AT3G63088 | RTFL14    | 0        | 1.784246 | 1.287654 | 0.824831 | 0.662467 | 0        | 0        | 2.15778  | 2.928738 | 0.995936 | 1.330334 | 3.10772   | -0.26807  | 0.720714 | 0.290218 | 0.710603 | 0.337674 | NA       |
| AT3G63090 | AT3G63090 | 57.06739 | 58.88012 | 73.3963  | 91.14384 | 96.72022 | 88.71883 | 66.69776 | 70.12785 | 74.1947  | 62.36982 | 42.57069 | 60.08258  | 0.528115  | 0.023575 | 0.154527 | 0.635493 | -0.17803 | 0.721015 |
| AT3G63095 | AT3G63095 | 8.322328 | 5.352738 | 6.438272 | 1.237247 | 1.324935 | 0        | 0        | 0        | 0.972466 | 0        | 0        | 0         | -1.69526  | 0.005075 | -1.90755 | 0.002049 | 0.398755 | NA       |
| AT3G63110 | IPT3      | 166.4466 | 165.9349 | 178.984  | 83.30795 | 92.08295 | 82.73778 | 72.92289 | 48.55005 | 68.33722 | 120.9015 | 137.0244 | 131.5601  | -0.36393  | 8.36E-08 | -1.38236 | 0.406149 | -0.38838 | 0.175552 |
| AT3G63120 | CYCU3-1   | 260.37   | 228.3835 | 274.2704 | 152.1813 | 166.2793 | 151.5198 | 127.1704 | 131.6246 | 152.9444 | 279.2249 | 235.4691 | 232.0431  | -0.69242  | 1.05E-05 | -0.88165 | 5.02E-08 | -0.03273 | 0.937457 |
| AT3G63130 | RANGAP1   | 267.5034 | 271.2054 | 274.2704 | 184.3498 | 202.0525 | 207.3429 | 167.0667 | 189.8846 | 214.7741 | 230.2886 | 227.4871 | 238.2585  | -0.40196  | 0.012518 | -0.47615 | 0.004212 | -0.16984 | 0.567409 |
| AT3G63140 | CSF41A    | 2749     |          |          |          |          |          |          |          |          |          |          |           |           |          |          |          |          |          |

|           |           |          |          |          |           |          |          |          |          |          |          |          |           |           |          |          |          |          |          |
|-----------|-----------|----------|----------|----------|-----------|----------|----------|----------|----------|----------|----------|----------|-----------|-----------|----------|----------|----------|----------|----------|
| AT4G00050 | UNE10     | 175.9578 | 210.541  | 160.9568 | 166.6159  | 158.9921 | 117.6272 | 94.26617 | 93.86342 | 74.1947  | 165.0401 | 175.6041 | 141.9192  | -0.27449  | 0.210505 | -1.02131 | 5.71E-07 | -0.17181 | 0.664886 |
| AT4G00060 | MEE4A     | 483.8839 | 520.9998 | 430.0766 | 372.8237  | 335.8709 | 420.6668 | 425.0871 | 455.2916 | 280.1826 | 452.9008 | 564.0616 | 364.6391  | -0.33553  | 0.142196 | -0.2958  | 0.226814 | -0.05392 | 0.919771 |
| AT4G00070 | AT4G00070 | 1.188904 | 1.784246 | 1.287654 | 1.649662  | 2.649869 | 0        | 0.889303 | 1.07889  | 0.976246 | 6.716749 | 2.660668 | 1.035907  | 0.032512  | 0.969723 | -0.19804 | 0.815424 | 0.665872 | 0.91     |
| AT4G00080 | UNE11     | 0        | 0        | 0        | 0         | 0        | 0        | 0        | 0        | 0.976246 | 0        | 0        | 0         | 0         | NA       | 0.16673  | NA       | 0        | NA       |
| AT4G00085 | AT4G00085 | 0        | 0        | 0        | 0         | 0        | 0        | 0        | 0        | 0        | 0        | 0        | 0         | #N/A      | NA       | #N/A     | #N/A     | #N/A     | NA       |
| AT4G00090 | AT4G00090 | 170.0133 | 178.4246 | 160.9568 | 218.9927  | 202.715  | 202.3587 | 180.5286 | 194.2002 | 183.5342 | 179.4332 | 127.7121 | 171.9605  | 0.294789  | 0.098871 | 0.131748 | 0.540923 | -0.07268 | 0.858201 |
| AT4G00100 | RP513B    | 1513.475 | 1561.215 | 1623.732 | 1889.276  | 1846.959 | 1676.686 | 1281.486 | 1292.51  | 1983.732 | 1572.679 | 1217.256 | 1693.707  | 0.199973  | 0.349088 | -0.04279 | 0.827278 | -0.06504 | 0.882728 |
| AT4G00110 | GAE3      | 68.95643 | 60.66437 | 63.09506 | 43.71605  | 38.4231  | 36.88311 | 33.79353 | 33.44559 | 41.00233 | 47.01725 | 38.57969 | 47.65117  | -0.65499  | 0.10637  | -0.79776 | 0.003375 | -0.50444 | 0.214789 |
| AT4G00114 | AT4G00114 | 0        | 0        | 0        | 0.412416  | 0        | 0        | 0        | 0        | 0        | 0        | 0        | 0         | 0.095918  | NA       | 0        | NA       | 0        | NA       |
| AT4G00120 | IND       | 0        | 0        | 0        | 0         | 0.662467 | 0        | 0        | 0        | 0        | 0        | 1.330334 | 0         | 0.101524  | NA       | 0        | NA       | 0.179327 | NA       |
| AT4G00124 | AT4G00124 | 0        | 0        | 0        | 0         | 0        | 0        | 0        | 0        | 0        | 0        | 0        | 0         | #N/A      | #N/A     | #N/A     | #N/A     | #N/A     | #N/A     |
| AT4G00130 | AT4G00130 | 13.07794 | 7.136984 | 9.01358  | 2.886909  | 7.949607 | 4.984204 | 7.114428 | 7.55223  | 5.857476 | 7.676285 | 14.63367 | 3.10772   | -0.72002  | 0.220593 | -0.40526 | 0.547818 | -0.20457 | NA       |
| AT4G00140 | EDA3A     | 1.188904 | 5.352738 | 0        | 2.062078  | 0        | 1.993682 | 2.66791  | 0        | 1.952492 | 3.838143 | 2.660668 | 3.10772   | -0.24697  | 0.755808 | -0.137   | 0.875536 | 0.361179 | NA       |
| AT4G00150 | SLC6      | 142.6685 | 133.8185 | 108.163  | 117.9509  | 115.2693 | 107.6588 | 80.03731 | 100.3368 | 81.02842 | 101.7108 | 94.45371 | 94.26749  | -0.16231  | 0.470466 | -0.54582 | 0.090932 | -0.3911  | 0.208704 |
| AT4G00160 | AT4G00160 | 0        | 1.784246 | 1.287654 | 0.824831  | 0.662467 | 0.996841 | 1.778607 | 3.23667  | 0        | 0        | 0        | 0         | -0.08299  | 0.916889 | 0.286486 | 0.704922 | -0.11544 | NA       |
| AT4G00165 | AT4G00165 | 170.0133 | 135.6027 | 187.9975 | 166.6159  | 180.8536 | 124.6051 | 176.8211 | 192.0424 | 328.9949 | 251.3983 | 211.5231 | 165.745   | -0.0619   | 0.860388 | 0.469204 | 0.107942 | 0.327481 | 0.487193 |
| AT4G00170 | PVA13     | 175.9578 | 155.2294 | 172.5547 | 212.394   | 247.7628 | 211.3302 | 224.9938 | 201.7524 | 243.0853 | 200.5429 | 174.2738 | 215.4686  | 0.4014    | 0.018943 | 0.398654 | 0.026656 | 0.222862 | 0.462053 |
| AT4G00180 | YAB3      | 222.325  | 219.4623 | 205.617  | 192.5981  | 190.1281 | 152.5166 | 178.75   | 174.7802 | 173.7718 | 221.6527 | 218.1748 | 226.8635  | -0.263    | 0.112033 | -0.29681 | 0.008994 | 0.036533 | 0.927039 |
| AT4G00190 | PME38     | 0        | 0        | 0        | 0         | 0        | 0        | 1.07889  | 0        | 0        | 1.330334 | 0        | 0         | 0         | NA       | 0.160793 | NA       | 0.184979 | NA       |
| AT4G00200 | AHL7      | 34.47821 | 24.97944 | 28.3284  | 58.56301  | 54.98478 | 54.82624 | 42.68657 | 34.52448 | 35.14486 | 32.62421 | 51.88302 | 37.29264  | 0.872566  | 0.002729 | 0.31461  | 0.392981 | 0.399973 | 0.457847 |
| AT4G00210 | LBD31     | 1.188904 | 3.568492 | 2.575309 | 0.824831  | 0.662467 | 0.996841 | 0        | 3.23667  | 0        | 0        | 0        | 3.10772   | -0.56098  | 0.414831 | -0.44447 | 0.544784 | -0.42511 | NA       |
| AT4G00220 | LBD30     | 2.377808 | 8.92123  | 6.438272 | 2.886909  | 3.312336 | 2.990522 | 1.778607 | 3.23667  | 0.976246 | 3.838143 | 5.321336 | 1.035907  | -0.57886  | 0.399163 | -0.91827 | 0.182341 | -0.5014  | NA       |
| AT4G00225 | AT4G00225 | 0        | 0        | 0        | 0         | 0        | 0        | 0.889303 | 0        | 0        | 1.330334 | 0        | 0         | 0         | NA       | 0.141773 | NA       | 0.183636 | NA       |
| AT4G00230 | SBT4.14   | 77.27876 | 94.56504 | 126.1901 | 92.38109  | 62.93439 | 56.81992 | 66.69776 | 92.78453 | 61.5035  | 123.7801 | 143.6761 | 79.7648   | -0.44507  | 0.158031 | -0.40925 | 0.227702 | 0.204089 | 0.732624 |
| AT4G00231 | MEE50     | 155.7464 | 157.0137 | 122.3272 | 94.44317  | 107.3197 | 133.5767 | 109.3843 | 147.8079 | 111.292  | 124.7396 | 89.13238 | 120.1652  | -0.37541  | 0.11145  | -0.23208 | 0.388147 | -0.35638 | 0.336105 |
| AT4G00232 | AT4G00232 | 0        | 0        | 0        | 0         | 0        | 0        | 0        | 0        | 0        | 0        | 0        | 0         | #N/A      | #N/A     | #N/A     | #N/A     | #N/A     | #N/A     |
| AT4G00234 | AT4G00234 | 11.88904 | 7.136984 | 9.01358  | 14.846696 | 13.24935 | 15.94945 | 11.56095 | 15.10446 | 11.71495 | 11.51443 | 1.330334 | 13.46678  | 0.515902  | 0.330214 | 0.338732 | 0.578197 | -0.05204 | NA       |
| AT4G00236 | AT4G00236 | 0        | 0        | 1.287654 | 0         | 0.662467 | 0        | 0        | 0        | 0        | 0        | 0        | 0         | -0.08303  | NA       | -0.19962 | NA       | -0.19582 | NA       |
| AT4G00238 | AT4G00238 | 204.4915 | 189.1301 | 173.8333 | 188.4739  | 212.652  | 175.444  | 154.7388 | 170.4646 | 240.1565 | 193.8262 | 184.9164 | 174.0323  | 0.024199  | 0.928601 | -0.00678 | 0.980879 | -0.03737 | 0.942826 |
| AT4G00240 | PLDBETA2  | 34.47821 | 30.33218 | 16.73951 | 47.01538  | 33.78583 | 46.85152 | 24.9005  | 35.60337 | 24.40615 | 31.66468 | 25.27635 | 29.00538  | 0.605308  | 0.083055 | 0.046799 | 0.925872 | 0.078988 | 0.928827 |
| AT4G00250 | AT4G00250 | 1.188904 | 1.784246 | 2.575309 | 2.886909  | 4.637271 | 7.94726  | 3.557214 | 4.31556  | 8.86214  | 1.919071 | 1.330334 | 1.035907  | 0.815538  | 0.220765 | 0.925386 | 0.179155 | -0.17782 | NA       |
| AT4G00260 | REM15.15  | 1.188904 | 3.568492 | 1.580617 | 6.186234  | 5.962205 | 0.996841 | 3.557214 | 2.15778  | 3.904984 | 5.757214 | 3.991002 | 8.287252  | -0.321847 | 0.66186  | -0.02324 | 0.978758 | 0.580907 | NA       |
| AT4G00270 | AT4G00270 | 234.2141 | 242.6575 | 243.3667 | 307.713   | 292.8105 | 255.1912 | 299.6953 | 292.3792 | 405.1421 | 204.3811 | 175.6041 | 235.1508  | 0.240411  | 0.225896 | 0.46058  | 0.014936 | -0.21727 | 0.517788 |
| AT4G00280 | AT4G00280 | 0        | 0        | 0        | 1.649662  | 1.987402 | 0        | 0.889303 | 0        | 0        | 0        | 0        | 0         | 0.606536  | NA       | 0.137963 | NA       | 0        | NA       |
| AT4G00290 | MSL1      | 168.8244 | 153.4452 | 187.9975 | 218.1678  | 219.9391 | 211.3302 | 163.6318 | 157.5179 | 180.6055 | 137.2136 | 135.6941 | 146.0628  | 0.337845  | 0.0379   | -0.03023 | 0.896994 | -0.28489 | 0.292233 |
| AT4G00300 | AT4G00300 | 615.8522 | 629.8388 | 549.8284 | 451.1826  | 482.2762 | 630.0034 | 508.6816 | 550.2339 | 683.3722 | 428.9124 | 482.9112 | 487.912   | -0.20022  | 0.298292 | -0.04175 | 0.86395  | -0.352   | 0.181229 |
| AT4G00305 | AT4G00305 | 2.377808 | 3.568492 | 1.287654 | 0.824831  | 1.324935 | 1.993682 | 5.57214  | 2.15778  | 2.928738 | 0        | 0        | 0.1035907 | -0.40507  | 0.589271 | 0.219309 | 0.797774 | -0.84464 | NA       |
| AT4G00310 | MEE46     | 22.58917 | 28.54794 | 36.05432 | 31.756    | 28.48609 | 20.93366 | 26.6791  | 31.28781 | 47.83605 | 24.94793 | 15.96401 | 36.25673  | -0.06952  | 0.887218 | 0.255815 | 0.579127 | -0.13909 | 0.874312 |
| AT4G00315 | AT4G00315 | 0        | 0        | 0        | 0         | 0        | 0        | 0        | 0        | 0        | 0        | 0        | 0         | #N/A      | #N/A     | #N/A     | #N/A     | #N/A     | #N/A     |
| AT4G00320 | AT4G00320 | 0        | 0        | 1.287654 | 0         | 0.662467 | 0        | 0        | 0        | 0        | 0.995362 | 0        | 0         | -0.10175  | NA       | -0.22303 | NA       | -0.04106 | NA       |
| AT4G00330 | CRK2      | 595.6409 | 685.1505 | 627.0877 | 685.4347  | 771.7744 | 779.5295 | 795.9266 | 878.2164 | 776.1156 | 530.6232 | 718.3803 | 505.5224  | 0.226304  | 0.182049 | 0.357019 | 0.031332 | -0.12084 | 0.701308 |
| AT4G00335 | RHB1A     | 112.9459 | 135.6027 | 126.1901 | 145.1703  | 156.3423 | 136.5672 | 124.5025 | 120.8357 | 140.5794 | 101.7108 | 111.7481 | 95.3034   | 0.233283  | 0.239136 | 0.050482 | 0.846352 | -0.26939 | 0.409163 |
| AT4G00340 | RLK4      | 349.5378 | 385.3971 | 310.3247 | 232.19    | 182.1785 | 224.8292 | 298.806  | 356.0337 | 274.3251 | 322.404  | 307.3071 | 279.6948  | -0.69248  | 2.33E-05 | -0.16423 | 0.419923 | -0.19291 | 0.528933 |
| AT4G00342 | AT4G00342 | 0        | 0        | 0        | 0         | 0        | 0        | 0.889303 | 0        | 0        | 0        | 0        | 0         | 0         | NA       | 0.160764 | NA       | 0        | NA       |
| AT4G00350 | AT4G00350 | 1.188904 | 0        | 0        | 0         | 0        | 0        | 0        | 1.07889  | 0        | 0        | 1.330334 | 1.035907  | -0.29834  | NA       | -0.04417 | NA       | 0.166611 | NA       |
| AT4G00355 | AT4G00355 | 400.6606 | 467.4725 | 502.1852 | 633.8827  | 635.3061 | 636.9813 | 539.8072 | 537.2872 | 658.966  | 395.3287 | 365.8418 | 483.7683  | 0.470332  | 0.002473 | 0.373499 | 0.044401 | -0.13228 | 0.671174 |
| AT4G00356 | AT4G00356 | 0        | 0        | 0        | 0         | 0        | 0        | 0        | 0        | 0        | 0        | 0        | 0         | #N/A      | #N/A     | #N/A     | #N/A     | #N/A     | #N/A     |
| AT4G00360 | CYP86A2   | 621.7968 | 711.9142 | 602.6222 | 292.4026  | 270.2866 | 360.8564 | 257.898  | 422.9249 | 529.1253 | 582.4381 | 439.0102 | 530.3841  | -1.03143  | 4.19E-06 | -0.65403 | 0.006173 | -0.30525 | 0.44794  |
| AT4G00370 | PHT4      | 659.8417 | 715.4827 | 650.2654 | 473.4531  | 494.8631 | 491.4425 | 533.5821 | 568.575  | 491.0517 | 646.727  | 647.8726 | 671.2674  | -0.46735  | 0.00002  | -0.34142 | 0.003441 | -0.0397  | 0.880921 |
| AT4G00380 | FDM2      | 137.9129 | 90.99655 | 109.4506 | 42.4788   | 35.77323 | 43.86099 | 27.56841 | 60.41784 | 41.97858 | 36.35821 | 94.45371 | 79.7648   | -1.41183  | 3.45E-08 | -1.33447 | 5.46E-07 | -0.37334 | 0.404462 |
| AT4G00390 | AT4G00390 | 3.566712 | 12.89912 | 9.01358  | 4.948987  | 5.962205 | 1.993682 | 4.446517 | 3.23667  | 10.73871 | 1.919071 | 3.991002 | 11.39497  | -0.59378  | 0.366807 | -0.27007 | 0.727145 | -0.33051 | NA       |
| AT4G00400 | GPAT8     | 487.4506 | 594.1539 | 442.9531 | 253.6356  | 252.4    | 299.0522 | 235.6654 | 255.6969 | 227.4653 | 450.0222 | 506.8572 | 420.5781  | -0.90697  | 1.02E-09 | -1.06175 | 2.09E-12 | -0.14063 | 0.637513 |
| AT4G00413 | AT4G00413 | 0        | 0        | 0        | 0         | 0        | 0        | 0        | 0        | 0        | 0        | 0        | 0         | #N/A      | #N/A     | #N/A     | #N/A     | #N/A     | #N/A     |
| AT4G00416 | MBD3      | 0        | 0        | 0        | 0         | 0        | 0        | 0        | 0        | 0        | 0        | 0        | 0         | #N/A      | #N/A     | #N/A     | #N/A     | #N/A     | #N/A     |
| AT4G00420 | AT4G00420 | 156.9353 | 167.7191 | 181.5593 | 208.2699  | 227.8887 | 205.3492 | 168.9677 | 149.9657 | 164.9856 | 209.1788 | 258.0848 | 214.4327  | 0.337274  | 0.046791 | -0.06146 | 0.7933   | 0.416072 | 0.074912 |
| AT4G00430 | PIP1.4    | 2304.096 | 2307.03  | 2386.023 |           |          |          |          |          |          |          |          |           |           |          |          |          |          |          |

|           |           |          |          |          |          |          |          |          |          |          |          |          |          |          |          |           |          |           |          |   |
|-----------|-----------|----------|----------|----------|----------|----------|----------|----------|----------|----------|----------|----------|----------|----------|----------|-----------|----------|-----------|----------|---|
| AT4G00880 | AT4G00880 | 391.1494 | 356.8492 | 466.1309 | 287.8661 | 303.41   | 251.2039 | 399.2973 | 266.4858 | 408.0708 | 589.1549 | 646.5423 | 563.5332 | -0.51496 | 0.006227 | -0.17369  | 0.445834 | 0.551316  | 0.021706 |   |
| AT4G00885 | MIR165B   | 0        | 0        | 0        | 0.412416 | 0        | 0        | 0.889303 | 0        | 0        | 0        | 0        | 0        | 0.066177 | NA       | 0.148539  | NA       | 0.168189  | NA       |   |
| AT4G00890 | AT4G00890 | 8.322328 | 7.136984 | 7.752926 | 2.062078 | 0.662467 | 3.987363 | 3.557214 | 4.31556  | 2.928738 | 4.797678 | 5.321336 | 4.143626 | -1.30657 | 0.027171 | -0.79328  | 0.229553 | -0.52183  | NA       |   |
| AT4G00891 | AT4G00891 | 0        | 0        | 0        | 0        | 0        | 0        | 0        | 0        | 0        | 0        | 0        | 0        | #N/A     | #N/A     | #N/A      | #N/A     | #N/A      | #N/A     |   |
| AT4G00893 | AT4G00893 | 1.188904 | 1.784246 | 2.575309 | 0        | 1.324935 | 0.996841 | 0        | 2.15778  | 0.976246 | 1.919071 | 2.660668 | 4.143626 | -0.55338 | 0.438423 | -0.34048  | 0.667236 | 0.359202  | 0        |   |
| AT4G00895 | AT4G00895 | 477.9394 | 458.5512 | 451.9667 | 512.6326 | 571.7093 | 419.67   | 680.3172 | 575.0483 | 1288.645 | 569.0046 | 790.2184 | 609.113  | 0.110552 | 0.740093 | 0.83378   | 0.00151  | 0.478667  | 0.239452 |   |
| AT4G00900 | ECA2      | 222.325  | 158.7979 | 133.9161 | 104.7536 | 98.04516 | 129.5893 | 180.5286 | 186.648  | 118.1258 | 160.2424 | 121.0604 | 135.7038 | -0.61909 | 0.01276  | -0.08704  | 0.79599  | -0.29252  | 0.508138 |   |
| AT4G00905 | AT4G00905 | 28.53369 | 16.05821 | 29.61605 | 16.90904 | 15.23675 | 17.94313 | 16.89677 | 11.86779 | 12.6912  | 30.70514 | 31.92802 | 26.93357 | -0.55189 | 0.153202 | -0.77166  | 0.060031 | 0.219928  | 0.769636 |   |
| AT4G00910 | ALMT10    | 2.377808 | 1.784246 | 1.287654 | 1.237247 | 1.987402 | 0        | 0        | 0        | 0.976246 | 0        | 1.330334 | 0        | -0.21657 | 0.772305 | -0.66471  | 0.309588 | -0.61275  | NA       |   |
| AT4G00920 | AT4G00920 | 0        | 0        | 0        | 0        | 0        | 0        | 0        | 0        | 0        | 0        | 1.330334 | 0        | 0        | 0        | 0         | 0        | 0.172362  | NA       |   |
| AT4G00930 | CIP4.1    | 191.4135 | 157.0137 | 139.0667 | 117.5384 | 131.831  | 131.583  | 143.1779 | 152.1235 | 116.1733 | 156.4043 | 138.3547 | 146.0628 | -0.35782 | 0.07108  | -0.24401  | 0.273209 | -0.14271  | 0.712278 |   |
| AT4G00940 | DOF4.1    | 30.9115  | 33.90067 | 27.04074 | 41.65397 | 41.07297 | 33.89259 | 58.69403 | 48.55005 | 40.02609 | 29.7456  | 47.89202 | 23.82585 | 0.338188 | 0.345681 | 0.645464  | 0.061384 | 0.113468  | 0.883453 |   |
| AT4G00950 | MEE47     | 222.325  | 262.2842 | 266.5444 | 233.8396 | 262.9995 | 226.2829 | 241.8905 | 173.7013 | 312.3987 | 313.7682 | 460.2956 | 282.8025 | -0.05069 | 0.871533 | -0.04027  | 0.9046   | 0.472662  | 0.184116 |   |
| AT4G00955 | AT4G00955 | 63.01191 | 87.42806 | 90.1358  | 237.139  | 231.8635 | 233.2607 | 85.37313 | 67.97007 | 64.43224 | 62.36982 | 53.21336 | 66.29802 | 1.522887 | 1.42E-15 | -0.12375  | 0.670578 | -0.36915  | 0.323403 |   |
| AT4G00960 | AT4G00960 | 16.64466 | 12.48972 | 16.73951 | 32.99325 | 33.78583 | 30.90206 | 10.67164 | 8.63112  | 13.66744 | 15.35257 | 10.64267 | 10.35907 | 0.9952   | 0.008888 | -0.42724  | 0.39497  | -0.29556  | 0.72969  |   |
| AT4G00970 | CRK41     | 256.8033 | 322.9485 | 236.9284 | 270.1322 | 300.0977 | 340.9195 | 345.9391 | 310.7203 | 344.6148 | 197.6643 | 223.4961 | 188.535  | 0.157356 | 0.411868 | 0.299118  | 0.104944 | -0.40792  | 0.099307 |   |
| AT4G00975 | AT4G00975 | 0        | 1.784246 | 0        | 0        | 0        | 0        | 0        | 0        | 0        | 0.995936 | 1.330334 | 0        | -0.3228  | NA       | -0.28766  | NA       | 0.130533  | NA       |   |
| AT4G00980 | AT4G00980 | 20.21137 | 30.33218 | 16.73951 | 22.27044 | 17.22415 | 27.91154 | 23.12189 | 25.89336 | 15.61994 | 17.27164 | 33.25835 | 20.71813 | 0.014032 | 0.979054 | -0.02654  | 0.962791 | 0.077802  | 0.938531 |   |
| AT4G00985 | AT4G00985 | 0        | 0        | 0        | 0        | 0        | 0        | 0        | 0        | 0        | 0        | 0        | 0        | #N/A     | #N/A     | #N/A      | #N/A     | #N/A      | #N/A     |   |
| AT4G00990 | AT4G00990 | 357.8601 | 281.9109 | 275.558  | 240.4383 | 242.463  | 286.0933 | 317.4813 | 294.537  | 233.3228 | 312.8086 | 280.7005 | 297.3052 | -0.25662 | 0.17305  | -0.11619  | 0.602872 | -0.04097  | 0.926932 |   |
| AT4G01000 | AT4G01000 | 932.1007 | 997.3935 | 867.879  | 1042.174 | 1132.157 | 991.8566 | 932.8794 | 1047.602 | 1255.452 | 817.5244 | 875.3598 | 830.797  | 0.178655 | 0.242371 | 0.208623  | 0.184293 | -0.154587 | 0.517599 |   |
| AT4G01010 | CNGC13    | 117.7015 | 123.113  | 95.28642 | 270.1322 | 232.526  | 318.989  | 321.0386 | 324.7459 | 208.9166 | 57.5214  | 91.79304 | 78.7289  | 1.24359  | 3.37E-08 | 1.301025  | 9.15E-09 | -0.53988  | 0.152501 |   |
| AT4G01020 | AT4G01020 | 243.7253 | 199.8356 | 157.0938 | 95.68041 | 88.77061 | 114.6367 | 128.949  | 176.938  | 99.57709 | 165.9997 | 145.0064 | 120.1652 | -0.97413 | 4.34E-05 | -0.54886  | 0.035388 | -0.45974  | 0.226969 |   |
| AT4G01023 | AT4G01023 | 0        | 0        | 0        | 0.412416 | 0.662467 | 0.996841 | 0        | 0        | 0        | 0        | 0        | 0        | 0.410231 | NA       | 0         | NA       | 0         | NA       |   |
| AT4G01026 | PYL7      | 222.325  | 287.2636 | 279.421  | 239.201  | 258.3622 | 294.068  | 321.0386 | 292.3792 | 317.2799 | 315.6872 | 344.5565 | 304.5565 | 0.002757 | 0.990376 | 0.24211   | 0.175541 | 0.288993  | 0.24294  |   |
| AT4G01030 | PCMP-56   | 52.31177 | 71.36984 | 45.0679  | 18.97112 | 20.53649 | 19.93682 | 26.6791  | 35.60337 | 20.50117 | 34.54328 | 43.90102 | 37.29264 | -1.39339 | 2.51E-06 | -0.9504   | 0.002595 | -0.5016   | 0.30562  |   |
| AT4G01037 | WTF1      | 444.6501 | 403.2396 | 432.6519 | 443.3467 | 499.5003 | 429.6384 | 486.449  | 496.2894 | 781.973  | 328.1612 | 335.2442 | 400.8958 | 0.096584 | 0.692623 | 0.449854  | 0.029825 | -0.26078  | 0.448737 |   |
| AT4G01040 | AT4G01040 | 216.3805 | 249.7944 | 258.8185 | 193.0105 | 188.1407 | 195.3808 | 234.7761 | 225.488  | 162.058  | 260.0342 | 280.7005 | 238.2585 | -0.32185 | 0.082365 | -0.21261  | 0.307268 | 0.102157  | 0.786163 |   |
| AT4G01050 | STR4      | 5832.763 | 5174.313 | 4929.141 | 2519.447 | 2668.418 | 2816.075 | 2938.259 | 2977.736 | 2897.498 | 5098.013 | 6269.864 | 6741.344 | -0.98304 | 1.21E-15 | -0.84503  | 1.01E-11 | -0.104764 | 0.967712 |   |
| AT4G01060 | ETC3      | 4.755616 | 0        | 2.575309 | 3.299255 | 3.312336 | 1.993682 | 0.889303 | 1.07889  | 3.904984 | 2.878607 | 5.321336 | 6.215439 | 0.079532 | 0.925548 | -0.23611  | 0.780446 | 0.516345  | NA       |   |
| AT4G01070 | UG7Z21    | 546.8958 | 497.8046 | 476.4321 | 465.2048 | 466.377  | 373.8153 | 347.7177 | 363.5859 | 566.2227 | 465.3748 | 443.0012 | 510.7019 | -0.21265 | 0.335263 | -0.24606  | 0.280887 | -0.09751  | 0.823473 |   |
| AT4G01080 | TBL26     | 52.31177 | 46.3904  | 59.2321  | 14.43455 | 7.28714  | 13.95577 | 20.49891 | 20.50117 | 75.80331 | 89.13238 | 54.90305 | 0        | -1.96764 | 4.09E-10 | -1.34809  | 3.55E-05 | -0.445262 | 0.368615 |   |
| AT4G01090 | AT4G01090 | 279.3924 | 317.5958 | 240.7914 | 263.5336 | 248.4252 | 315.9985 | 283.6878 | 243.8291 | 217.7029 | 269.6295 | 279.3701 | 258.9766 | -0.0168  | 0.944242 | -0.15801  | 0.455172 | -0.04625  | 0.914481 |   |
| AT4G01100 | ADN1T     | 687.1865 | 578.0957 | 754.5654 | 668.1132 | 527.9864 | 636.9813 | 559.3719 | 623.5984 | 485.1943 | 619.86   | 518.8302 | 594.6103 | -0.14004 | 0.460211 | -0.27488  | 0.130245 | -0.21811  | 0.441571 |   |
| AT4G01110 | AT4G01110 | 5.94452  | 8.92123  | 7.725926 | 10.7228  | 11.26194 | 5.981045 | 7.114428 | 5.39445  | 11.71495 | 11.51443 | 11.97301 | 8.287252 | 0.294599 | 0.625924 | 0.093213  | 0.989199 | 0.401002  | NA       |   |
| AT4G01120 | GBF2      | 261.5589 | 239.089  | 334.7901 | 228.4782 | 245.7754 | 256.1881 | 240.1119 | 233.0402 | 287.0163 | 262.9128 | 271.3881 | 310.8772 | -0.19966 | 0.29489  | -0.13873  | 0.516415 | 0.011248  | 0.982852 |   |
| AT4G01130 | AT4G01130 | 126.0238 | 142.7397 | 137.779  | 111.3522 | 124.5438 | 110.6493 | 207.2077 | 179.0957 | 134.7219 | 142.9708 | 129.0424 | 168.7528 | -0.22026 | 0.346578 | -0.354083 | 0.120805 | 0.121569  | 0.784341 |   |
| AT4G01140 | AT4G01140 | 10.70014 | 3.568492 | 3.862963 | 0.824831 | 0        | 1.993682 | 2.66791  | 1.07889  | 1.952492 | 5.757214 | 3.991002 | 4.143626 | -1.59504 | 0.010265 | -1.03272  | 0.128892 | -0.27463  | NA       |   |
| AT4G01150 | CURT1A    | 8174.904 | 8548.323 | 9343.22  | 4383.153 | 5287.814 | 3779.023 | 5873.849 | 4809.691 | 10528.81 | 10249.96 | 10789.01 | 12403.94 | -0.28155 | 0.000111 | -0.28555  | 0.314829 | 0.345496  | 0.398983 |   |
| AT4G01160 | AT4G01160 | 0        | 0        | 0        | 0.412416 | 0.662467 | 0        | 0        | 0        | 0        | 0        | 0        | 0        | 0.192415 | NA       | 0         | NA       | 0.380906  | NA       |   |
| AT4G01170 | AT4G01170 | 2.377808 | 1.784246 | 1.287654 | 0.824831 | 3.974804 | 0.996841 | 0.889303 | 1.07889  | 3.904984 | 2.878607 | 1.330334 | 1.035907 | 0.031948 | 0.970336 | 0.044215  | 0.960955 | -0.01697  | NA       |   |
| AT4G01180 | AT4G01180 | 14.26685 | 8.92123  | 14.1642  | 4.948987 | 2.649869 | 10.96525 | 0.889303 | 5.39445  | 0.976246 | 8.635821 | 7.982004 | 3.10772  | -0.82886 | 0.161127 | -1.63019  | 0.005686 | -0.71567  | NA       |   |
| AT4G01190 | PIPSK11   | 26.15589 | 23.1952  | 33.47901 | 29.69392 | 26.49869 | 26.9147  | 15.1818  | 11.86779 | 13.66744 | 19.19071 | 22.61568 | 32.1131  | 0.007579 | 0.98771  | -0.92337  | 0.018548 | -0.15919  | 0.845503 |   |
| AT4G01210 | AT4G01210 | 467.2393 | 447.8458 | 374.7073 | 323.3338 | 276.9113 | 367.8342 | 295.2488 | 370.0592 | 336.8049 | 403.9645 | 400.4305 | 412.2908 | -0.41072 | 0.011083 | -0.35906  | 0.036342 | -0.08161  | 0.817365 |   |
| AT4G01220 | MGP4      | 120.0793 | 105.2705 | 97.8613  | 79.59621 | 100.0326 | 77.75358 | 81.81592 | 79.83786 | 98.60085 | 111.3061 | 85.14137 | 95.98024 | -0.3199  | 0.172473 | -0.30489  | 0.230984 | -0.18431  | 0.617258 |   |
| AT4G01230 | RTNLB7    | 4.755616 | 7.136984 | 0        | 1.649662 | 5.622025 | 3.987363 | 4.446517 | 2.15778  | 1.952492 | 4.797678 | 2.660668 | 3.10772  | -0.00209 | 0.998498 | -0.22462  | 0.790812 | -0.04626  | NA       |   |
| AT4G01240 | AT4G01240 | 0        | 0        | 0        | 0        | 0        | 0        | 0        | 0.889303 | 0        | 0        | 0        | 0        | 0        | 0        | 0.160764  | NA       | 0         | NA       |   |
| AT4G01245 | AT4G01245 | 0        | 1.784246 | 0        | 0        | 0        | 0        | 0        | 0        | 0        | 0        | 0        | 0        | -0.2184  | NA       | -0.20558  | NA       | -0.19918  | NA       |   |
| AT4G01250 | WRKY22    | 10.70014 | 19.62671 | 25.75309 | 21.85803 | 28.48609 | 38.87679 | 48.91169 | 29.13003 | 52.71728 | 15.35257 | 13.30334 | 18.64632 | 0.573828 | 0.171719 | 1.115179  | 0.004858 | -0.1969   | 0.834756 |   |
| AT4G01260 | AT4G01260 | 0        | 0        | 0        | 0        | 0        | 0        | 0        | 0.889303 | 0        | 0.976246 | 0        | 0        | 0        | 0        | 0         | 0        | 0         | 0        | 0 |
| AT4G01265 | AT4G01265 | 1.188904 | 0        | 0        | 0.412416 | 0.662467 | 0.996841 | 0        | 1.07889  | 0.976246 | 2.878607 | 0        | 0        | 0.093223 | NA       | 0.102011  | NA       | 0.266393  | NA       |   |
| AT4G01270 | AT4G01270 | 26.15589 | 26.76369 | 28.3284  | 30.10634 | 36.4357  | 31.8989  | 20.45398 | 31.28781 | 29.28738 | 39.34096 | 34.58868 | 39.36445 | 0.25164  | 0.495596 | -0.01618  | 0.97269  | 0.45135   | 0.409163 |   |
| AT4G01280 | RVES      | 141.4796 | 183.7773 | 166.1074 | 220.6423 | 215.9    |          |          |          |          |          |          |          |          |          |           |          |           |          |   |

|           |           |          |          |          |          |          |          |          |          |          |          |          |          |          |          |           |          |          |          |
|-----------|-----------|----------|----------|----------|----------|----------|----------|----------|----------|----------|----------|----------|----------|----------|----------|-----------|----------|----------|----------|
| AT4G01680 | MYB55     | 55.87849 | 35.68492 | 65.67037 | 37.94223 | 37.09817 | 38.87679 | 21.34328 | 18.34113 | 16.59618 | 39.34096 | 42.57069 | 49.72351 | -0.46242 | 0.12676  | -1.39147  | 6.8E-06  | -0.26469 | 0.633705 |
| AT4G01690 | PPOX1     | 1574.109 | 1723.582 | 1697.128 | 1054.134 | 935.4038 | 1161.32  | 1132.973 | 1234.25  | 990.8897 | 1636.968 | 1213.265 | 1595.296 | -0.65495 | 1.18E-05 | -0.56361  | 0.000246 | -0.16357 | 0.564162 |
| AT4G01700 | AT4G01700 | 55.87849 | 73.15409 | 70.82099 | 238.7886 | 196.0903 | 232.2639 | 93.37687 | 119.7568 | 102.5058 | 50.85539 | 49.22236 | 37.29264 | 1.704372 | 2.8E-17  | 0.642046  | 0.006054 | -0.56698 | 0.178573 |
| AT4G01703 | AT4G01703 | 0        | 0        | 0        | 0        | 0        | 0        | 0        | 0        | 0        | 0        | 0        | 0        | #N/A     | #N/A     | #N/A      | #N/A     | #N/A     | #N/A     |
| AT4G01710 | ARCS5     | 51.12287 | 78.50683 | 64.38272 | 118.7757 | 90.09555 | 86.72515 | 67.58076 | 61.49673 | 106.4108 | 61.41028 | 78.4897  | 61.11849 | 0.605004 | 0.030982 | 0.280874  | 0.402255 | 0.055441 | 0.939955 |
| AT4G01720 | WRKY47    | 65.38972 | 42.82119 | 28.3284  | 165.3786 | 135.1433 | 165.7806 | 104.6523 | 60.52725 | 20.15025 | 21.28534 | 22.78994 | 1.640562 | 2.34E-09 | 0.758608 | 0.0014929 | -0.99421 | 0.021722 |          |
| AT4G01730 | PAT18     | 74.90095 | 71.36984 | 77.25926 | 116.3012 | 107.9822 | 104.6683 | 88.04104 | 89.54786 | 87.86214 | 96.9131  | 89.13238 | 91.15977 | 0.546158 | 0.006516 | 0.23516   | 0.34015  | 0.299448 | 0.399333 |
| AT4G01735 | AT4G01735 | 0        | 0        | 1.287654 | 0.824831 | 0.662467 | 0.0      | 0.889303 | 0.976246 | 0        | 0        | 0        | 0        | 0.068954 | NA       | 0.105952  | NA       | -0.25974 | NA       |
| AT4G01740 | AT4G01740 | 48.74506 | 58.88012 | 47.64321 | 70.93548 | 86.12075 | 91.70935 | 44.46517 | 45.31338 | 31.23987 | 39.34096 | 37.24935 | 24.86176 | 0.655613 | 0.015136 | -0.32903  | 0.326754 | -0.56778 | 0.208946 |
| AT4G01750 | RGXT2     | 39.23383 | 69.5856  | 51.50617 | 193.8353 | 181.516  | 214.3208 | 144.0672 | 140.2557 | 123.9832 | 28.78607 | 34.58868 | 26.93357 | 1.852562 | 9.96E-19 | 1.335079  | 1.37E-09 | -0.75438 | 0.037815 |
| AT4G01760 | AT4G01760 | 0        | 0        | 0.662467 | 0        | 0        | 0.889303 | 0        | 0.976246 | 0        | 0        | 0        | 0        | 0.079096 | NA       | 0.339943  | NA       | 0.392376 | NA       |
| AT4G01770 | RGXT1     | 0        | 3.568492 | 2.575309 | 7.011065 | 1.987402 | 3.987363 | 4.446517 | 3.23667  | 4.88123  | 0        | 2.660668 | 2.071813 | 0.689897 | 0.318764 | 0.608524  | 0.414745 | -0.16657 | NA       |
| AT4G01780 | AT4G01780 | 14.26685 | 16.05821 | 14.1642  | 8.660727 | 5.962205 | 5.981045 | 6.225124 | 6.47334  | 8.786214 | 17.27164 | 7.982004 | 11.39497 | -0.88514 | 0.068824 | -0.85563  | 0.105167 | -0.19988 | NA       |
| AT4G01790 | AT4G01790 | 15.45575 | 24.97944 | 16.73951 | 34.64291 | 39.74804 | 22.92734 | 19.56468 | 19.42002 | 39.04984 | 12.47396 | 10.64267 | 26.93357 | 0.715032 | 0.10174  | 0.411339  | 0.418926 | -0.13102 | 0.89957  |
| AT4G01800 | SECA1     | 231.8363 | 235.1636 | 210.1452 | 1020.729 | 897.6432 | 1213.155 | 1641.654 | 1935.529 | 1318.809 | 5312.481 | 2197.712 | 6284.174 | -1.0946  | 7.75E-13 | -0.34858  | 0.045929 | 0.00523  | 0.990831 |
| AT4G01810 | AT4G01810 | 555.2181 | 340.791  | 373.4198 | 287.0412 | 347.7953 | 414.6858 | 385.0684 | 413.2148 | 304.5888 | 355.9877 | 329.9228 | 391.5727 | -0.27609 | 0.244892 | -0.20183  | 0.441463 | -0.23294 | 0.557232 |
| AT4G01820 | ABC83     | 1.188904 | 0        | 0        | 0.412416 | 0        | 1.993682 | 1.778607 | 0        | 0        | 0        | 1.330334 | 1.035907 | 0.131516 | NA       | 0.079119  | NA       | 0.141956 | NA       |
| AT4G01830 | ABC85     | 1.188904 | 3.568492 | 1.287654 | 0.412416 | 0.662467 | 0.996841 | 1.778607 | 0        | 0        | 0.995936 | 0        | 1.035907 | -0.55128 | 0.416414 | -0.54053  | 0.438565 | -0.49319 | NA       |
| AT4G01840 | TPK5      | 86.78999 | 67.80135 | 63.09506 | 58.56301 | 62.93439 | 52.83256 | 90.70896 | 64.7334  | 68.33722 | 62.36982 | 70.5077  | 67.33392 | -0.3099  | 0.241693 | 0.036795  | 0.951104 | -0.12794 | 0.812628 |
| AT4G01850 | SAM2      | 2451.52  | 2683.506 | 2494.186 | 2436.964 | 2237.814 | 2519.017 | 2120.989 | 2383.268 | 2116.501 | 2463.128 | 2914.762 | 1993.084 | -0.0832  | 0.645652 | -0.20137  | 0.234326 | -0.04934 | 0.887115 |
| AT4G01860 | AT4G01860 | 305.5483 | 281.9109 | 294.8728 | 211.1568 | 209.3397 | 267.1533 | 227.6617 | 309.6414 | 169.8668 | 252.3579 | 244.7815 | 234.1149 | -0.35692 | 0.103785 | -0.31412  | 0.182296 | -0.26439 | 0.471105 |
| AT4G01865 | AT4G01865 | 0        | 0        | 0        | 0        | 0        | 0        | 0        | 0        | 0        | 0        | 0        | 0        | #N/A     | #N/A     | #N/A      | #N/A     | #N/A     | #N/A     |
| AT4G01870 | AT4G01870 | 74.90095 | 53.52738 | 55.36914 | 153.4186 | 129.8436 | 185.4124 | 191.2002 | 214.6991 | 163.0331 | 48.93632 | 54.54369 | 40.40035 | 1.278873 | 1.19E-08 | 1.556281  | 2.93E-12 | -0.35759 | 0.427403 |
| AT4G01880 | AT4G01880 | 134.3461 | 123.113  | 139.0667 | 147.2324 | 137.7932 | 155.5072 | 175.1928 | 153.2024 | 183.5342 | 135.2945 | 114.4087 | 151.2424 | 0.139628 | 0.51049  | 0.357465  | 0.069277 | 0.01725  | 0.974377 |
| AT4G01883 | AT4G01883 | 391.1494 | 426.4348 | 455.8052 | 329.52   | 360.3822 | 284.0996 | 363.7251 | 331.2192 | 383.0028 | 501.8371 | 590.6683 | 632.9389 | -0.427   | 0.000822 | -0.34856  | 0.043499 | 0.37943  | 0.093062 |
| AT4G01890 | AT4G01890 | 0        | 0        | 0        | 0        | 0        | 0        | 1.778607 | 0        | 0.976246 | 0        | 0        | 0        | 0        | NA       | 0.449696  | NA       | 0        | NA       |
| AT4G01895 | AT4G01895 | 3.566712 | 5.352738 | 11.58889 | 27.63184 | 31.79843 | 27.91154 | 23.12189 | 24.81447 | 29.28738 | 5.757214 | 10.64267 | 9.323159 | 1.764647 | 2.56E-05 | 1.588659  | 0.00029  | 0.18741  | 0.866179 |
| AT4G01897 | AT4G01897 | 139.1018 | 187.3458 | 168.6827 | 197.1346 | 222.589  | 201.3618 | 195.6468 | 152.1235 | 284.0876 | 280.1844 | 243.4511 | 232.0431 | 0.321543 | 0.188975 | 0.37478   | 0.174351 | 0.596951 | 0.052807 |
| AT4G01900 | GLB1      | 269.8812 | 285.4794 | 301.3111 | 294.467  | 293.473  | 246.2197 | 232.1082 | 210.3835 | 327.926  | 342.5542 | 470.9382 | 339.7773 | -0.03414 | 0.911128 | -0.0681   | 0.828386 | 0.412097 | 0.237341 |
| AT4G01910 | AT4G01910 | 11.88904 | 16.05821 | 14.1642  | 27.63184 | 31.13596 | 28.90838 | 16.00746 | 16.18335 | 13.66744 | 15.32527 | 11.97301 | 10.35907 | 0.980123 | 0.011058 | 0.117873  | 0.835915 | -0.1182  | 0.907842 |
| AT4G01915 | AT4G01915 | 128.4016 | 140.9554 | 140.3543 | 149.7069 | 204.0399 | 145.5388 | 238.3333 | 178.0168 | 234.299  | 217.0633 | 111.7481 | 155.386  | 0.279724 | 0.238317 | 0.652203  | 0.00292  | -0.08425 | 0.870094 |
| AT4G01920 | AT4G01920 | 46.36725 | 41.03766 | 32.19136 | 58.97543 | 62.93439 | 70.7757  | 24.01119 | 28.05114 | 18.54867 | 21.10978 | 14.63367 | 25.89766 | 0.653721 | 0.027188 | -0.71013  | 0.037381 | -0.85999 | 0.056905 |
| AT4G01925 | AT4G01925 | 2.377808 | 3.568492 | 0        | 8.660727 | 6.624673 | 7.97476  | 1.778607 | 0        | 0.976246 | 0        | 1.330334 | 0        | 1.40205  | 0.026537 | -0.40426  | 0.610729 | -0.66607 | NA       |
| AT4G01930 | AT4G01930 | 1.188904 | 3.568492 | 1.287654 | 1.649662 | 0        | 1.993682 | 2.66791  | 0        | 0        | 0.995936 | 2.660668 | 2.071813 | -0.26701 | 0.730045 | -0.37063  | 0.623067 | -0.00619 | NA       |
| AT4G01935 | AT4G01935 | 146.2352 | 133.8185 | 151.9432 | 129.4985 | 152.3675 | 135.5703 | 162.7425 | 126.2301 | 119.102  | 200.5429 | 219.5051 | 137.7756 | -0.05355 | 0.849683 | -0.08051  | 0.788031 | 0.349807 | 0.31531  |
| AT4G01940 | NIFU1     | 337.6487 | 390.7499 | 394.0222 | 498.6104 | 529.3114 | 445.5788 | 607.3943 | 555.6283 | 798.5692 | 523.9065 | 456.3046 | 618.4362 | 0.387267 | 0.038478 | 0.790235  | 6.96E-06 | 0.502524 | 0.038682 |
| AT4G01950 | GPAT3     | 135.535  | 140.9554 | 155.8062 | 103.1039 | 113.9444 | 195.3808 | 192.0896 | 240.5925 | 231.3703 | 156.4043 | 166.2917 | 157.4578 | -0.08778 | 0.77501  | 0.595197  | 0.015848 | 0.143865 | 0.777639 |
| AT4G01960 | AT4G01960 | 231.8363 | 251.5787 | 270.4074 | 334.0566 | 373.6315 | 292.0743 | 367.2823 | 327.9825 | 408.0708 | 259.0746 | 259.4151 | 264.1562 | 0.406002 | 0.10738  | 0.542663  | 0.000611 | 0.054007 | 0.887443 |
| AT4G01970 | RF54      | 2.377808 | 5.352738 | 0        | 0.824831 | 1.987402 | 0.996841 | 4.446517 | 6.47334  | 3.904984 | 1.919071 | 2.660668 | 2.071813 | -0.49471 | 0.49976  | 0.667207  | 0.362671 | -0.06476 | NA       |
| AT4G01975 | AT4G01975 | 8.322328 | 1.784246 | 6.438272 | 0.824831 | 2.649869 | 1.993682 | 2.66791  | 4.31556  | 0        | 2.878607 | 5.321336 | 8.287252 | -1.02643 | 0.114449 | -0.78525  | 0.267709 | -0.03133 | NA       |
| AT4G01980 | AT4G01980 | 2.377808 | 3.568492 | 2.575309 | 1.237247 | 1.324935 | 0        | 2.66791  | 3.23667  | 2.928738 | 6.716749 | 0        | 2.071813 | -0.73217 | 0.293224 | 0.056817  | 0.949656 | 0.097648 | NA       |
| AT4G01985 | AT4G01985 | 2.377808 | 3.568492 | 1.287654 | 0.824831 | 0        | 3.987363 | 0.889303 | 0        | 0        | 0        | 0        | 0        | -0.24417 | 0.741986 | -0.81035  | 0.202726 | -0.9739  | NA       |
| AT4G01990 | AT4G01990 | 55.87849 | 57.09587 | 63.09506 | 73.82239 | 72.8714  | 84.73147 | 81.81592 | 83.07453 | 96.64835 | 88.27728 | 78.4897  | 59.04667 | 0.367064 | 0.148117 | 0.546825  | 0.03128  | 0.342272 | 0.410201 |
| AT4G01995 | AT4G01995 | 219.9472 | 198.0513 | 181.5593 | 204.9705 | 189.4656 | 169.4629 | 278.352  | 227.6458 | 285.0638 | 268.67   | 303.3161 | 269.3357 | -0.08057 | 0.701642 | 0.392771  | 0.026563 | 0.47491  | 0.033162 |
| AT4G02000 | AT4G02000 | 7.133424 | 6.052738 | 7.725926 | 5.361402 | 5.962205 | 8.971567 | 6.225124 | 7.55223  | 3.904984 | 2.878607 | 6.65167  | 9.323159 | -0.04314 | 0.935837 | -0.16119  | 0.832362 | -0.0996  | NA       |
| AT4G02005 | AT4G02005 | 63.01191 | 60.66337 | 52.79383 | 59.80026 | 86.12075 | 70.7757  | 120.056  | 80.91675 | 71.26596 | 60.60099 | 78.4897  | 101.5188 | 0.272364 | 0.375713 | -0.59931  | 0.037889 | 0.536356 | 0.199817 |
| AT4G02010 | AT4G02010 | 329.3264 | 248.0102 | 256.2432 | 124.5495 | 117.9192 | 151.5198 | 147.6244 | 168.3068 | 109.3366 | 182.3118 | 211.5231 | 191.6427 | -1.06675 | 1.97E-08 | -0.95168  | 1.2E-06  | -0.50429 | 0.070998 |
| AT4G02020 | EZA1      | 442.2723 | 471.041  | 436.5148 | 379.837  | 329.2462 | 464.5278 | 465.1057 | 503.8416 | 294.8263 | 491.2822 | 500.2056 | 416.4344 | -0.19849 | 0.403558 | -0.09182  | 0.741489 | 0.0595   | 0.905042 |
| AT4G02030 | AT4G02030 | 279.3924 | 274.7739 | 261.3938 | 287.4537 | 284.8609 | 331.948  | 312.1455 | 312.8781 | 178.653  | 276.3463 | 279.3701 | 293.1615 | 0.142148 | 0.557949 | -0.0207   | 0.943987 | 0.056396 | 0.910629 |
| AT4G02040 | AT4G02040 | 11.88904 | 21.41095 | 21.89012 | 16.49662 | 20.53649 | 14.95261 | 18.67537 | 19.42002 | 21.40615 | 18.23118 | 25.27635 | 20.71813 | -0.0531  | 0.919392 | 0.181244  | 0.726272 | 0.203771 | 0.810702 |
| AT4G02050 | STP7      | 160.502  | 201.1698 | 181.5593 | 163.9724 | 323.284  | 321.9796 | 265.0124 | 235.198  | 211      |          |          |          |          |          |           |          |          |          |





|           |           |          |          |          |          |          |          |          |          |          |          |          |          |          |          |          |          |          |          |
|-----------|-----------|----------|----------|----------|----------|----------|----------|----------|----------|----------|----------|----------|----------|----------|----------|----------|----------|----------|----------|
| AT4G03923 | AT4G03923 | 0        | 0        | 0        | 0        | 0        | 0.996841 | 0        | 0        | 0        | 0        | 0        | 0.15625  | NA       | 0        | NA       | 0        | NA       |          |
| AT4G03926 | AT4G03926 | 9.511232 | 0        | 2.575309 | 2.886909 | 3.312336 | 2.995522 | 2.66791  | 2.15778  | 3.904984 | 4.797678 | 1.330334 | 5.179533 | -0.30849 | 0.68349  | -0.33774 | 0.671824 | -0.09315 | NA       |
| AT4G03930 | PME42     | 3.566712 | 5.352738 | 7.725926 | 1.237247 | 0        | 0.996841 | 4.446517 | 0        | 0.976246 | 2.878607 | 2.660668 | 3.10772  | -1.45554 | 0.022346 | -0.8937  | 0.260407 | -0.57205 | NA       |
| AT4G03935 | AT4G03935 | 127.2127 | 89.2123  | 113.3136 | 71.34789 | 98.70762 | 87.72199 | 118.2774 | 69.04896 | 115.197  | 121.861  | 150.3277 | 119.1293 | -0.35992 | 0.181567 | -0.12414 | 0.706842 | 0.221959 | 0.640162 |
| AT4G03940 | AT4G03940 | 8.322238 | 3.568492 | 3.862963 | 7.42348  | 6.242673 | 6.977885 | 0.889303 | 6.47334  | 3.904984 | 5.757214 | 3.991002 | 6.215439 | 0.297086 | 0.667043 | -0.38467 | 0.601722 | -0.00358 | NA       |
| AT4G03945 | AT4G03945 | 0        | 0        | 0        | 0        | 0        | 0.662467 | 0        | 0.889303 | 0        | 0        | 1.330334 | 0        | 0.09913  | NA       | 0.145297 | NA       | 0.18929  | NA       |
| AT4G03950 | AT4G03950 | 0        | 0        | 0        | 0        | 1.324935 | 0        | 0.889303 | 0        | 0        | 0        | 0        | 0        | 0.194769 | NA       | 0.126571 | NA       | 0        | NA       |
| AT4G03960 | AT4G03960 | 64.20081 | 39.25341 | 64.38272 | 148.882  | 182.841  | 155.5072 | 104.9378 | 110.0468 | 156.1994 | 93.07496 | 83.81104 | 75.62118 | 1.448431 | 3.24E-10 | 1.066931 | 1.15E-05 | 0.532907 | 0.166194 |
| AT4G03965 | AT4G03965 | 0        | 5.352738 | 2.575309 | 3.299325 | 3.974804 | 0.996841 | 4.446517 | 2.15778  | 0.976246 | 1.919071 | 1.330334 | 0        | 0.148692 | 0.856637 | 0.043325 | 0.961625 | -0.46559 | NA       |
| AT4G03970 | AT4G03970 | 0        | 1.784246 | 0        | 0.412416 | 0        | 0        | 0.889303 | 0        | 0.976246 | 0.959536 | 1.330334 | 0        | -0.24386 | NA       | 0.076272 | NA       | 0.124792 | NA       |
| AT4G03975 | AT4G03975 | 0        | 0        | 0        | 0        | 0        | 0        | 0        | 0        | 0        | 0        | 0        | 0        | #N/A     | #N/A     | #N/A     | #N/A     | #N/A     | #N/A     |
| AT4G03976 | AT4G03976 | 1.188904 | 0        | 0        | 0        | 0        | 0        | 0        | 0        | 0        | 0        | 0        | 0        | -0.2184  | NA       | -0.20558 | NA       | -0.19918 | NA       |
| AT4G03977 | AT4G03977 | 0        | 0        | 0        | 0        | 0        | 0        | 0        | 0        | 0        | 0        | 0        | 0        | #N/A     | #N/A     | #N/A     | #N/A     | #N/A     | #N/A     |
| AT4G03978 | AT4G03978 | 0        | 0        | 0        | 0        | 0        | 0        | 0        | 0        | 0        | 0        | 0        | 0        | #N/A     | #N/A     | #N/A     | #N/A     | #N/A     | #N/A     |
| AT4G03979 | AT4G03979 | 0        | 0        | 0        | 0        | 0        | 0        | 0        | 0        | 0        | 0        | 0        | 0        | #N/A     | #N/A     | #N/A     | #N/A     | #N/A     | #N/A     |
| AT4G03980 | AT4G03980 | 0        | 0        | 0        | 0        | 0        | 0        | 0        | 0        | 0        | 0        | 0        | 0        | #N/A     | #N/A     | #N/A     | #N/A     | #N/A     | #N/A     |
| AT4G03981 | AT4G03981 | 0        | 0        | 0        | 0        | 0.662467 | 0.996841 | 0.889303 | 0        | 0.976246 | 0        | 0        | 0        | 0.285636 | NA       | 0.34172  | NA       | 0        | NA       |
| AT4G03990 | AT4G03990 | 0        | 0        | 0        | 0        | 0        | 0        | 0.889303 | 0        | 0        | 0        | 0        | 0        | 0        | NA       | 0.160764 | NA       | 0        | NA       |
| AT4G04000 | AT4G04000 | 0        | 1.784246 | 0        | 0        | 0.662467 | 0        | 2.66791  | 0        | 0        | 0        | 0        | 0        | -0.1434  | NA       | 0.167882 | NA       | -0.23579 | NA       |
| AT4G04010 | AT4G04010 | 0        | 0        | 0        | 0        | 0        | 0        | 0        | 0        | 0        | 0        | 0        | 1.035907 | 0        | NA       | 0        | NA       | 0.172362 | NA       |
| AT4G04020 | PAP1      | 1017.702 | 1059.842 | 1043     | 859.8865 | 826.0967 | 744.6401 | 921.3184 | 838.2975 | 711.6833 | 999.8361 | 828.7981 | 996.5421 | -0.35325 | 0.01191  | -0.33136 | 0.02374  | -0.13938 | 0.591092 |
| AT4G04030 | ATOPF9    | 3.566712 | 0        | 0        | 0.412416 | 1.324935 | 0        | 0.889303 | 0        | 0        | 0.959536 | 0        | 0        | -0.25356 | NA       | -0.39699 | NA       | -0.37508 | NA       |
| AT4G04040 | PPF-BETA2 | 1128.27  | 1197.229 | 1109.958 | 1000.52  | 1035.436 | 1043.692 | 1290.379 | 1180.306 | 1183.21  | 1067.963 | 1205.283 | 1179.898 | -0.15612 | 0.162604 | 0.090397 | 0.47821  | 0.00758  | 0.980498 |
| AT4G04050 | AT4G04050 | 1.188904 | 0        | 0        | 0        | 0        | 0        | 4.446517 | 0        | 0        | 0        | 0        | 2.071813 | -0.22929 | NA       | 0.369399 | NA       | 0.099571 | NA       |
| AT4G04070 | AT4G04070 | 1.188904 | 0        | 0        | 0        | 0        | 0        | 0.889303 | 0        | 0        | 0        | 0        | 1.035907 | -0.2447  | NA       | -0.0484  | NA       | -0.02732 | NA       |
| AT4G04077 | AT4G04077 | 0        | 3.568492 | 0        | 0        | 0        | 0        | 0        | 0        | 0        | 0        | 0        | 0        | -0.44877 | NA       | -0.4322  | NA       | -0.42711 | NA       |
| AT4G04078 | AT4G04078 | 0        | 0        | 0        | 0        | 0        | 0        | 0        | 0        | 0        | 0        | 0        | 0        | #N/A     | #N/A     | #N/A     | #N/A     | #N/A     | #N/A     |
| AT4G04080 | ISU3      | 0        | 0        | 0        | 0        | 0        | 0        | 0        | 0        | 0.959536 | 1.330334 | 0        | 0        | 0        | NA       | 0        | NA       | 0.366448 | NA       |
| AT4G04090 | AT4G04090 | 0        | 0        | 0        | 0        | 0        | 0        | 0        | 0        | 0        | 0        | 0        | 0        | #N/A     | #N/A     | #N/A     | #N/A     | #N/A     | #N/A     |
| AT4G04100 | AT4G04100 | 0        | 0        | 0        | 0        | 0        | 0        | 0        | 0        | 0        | 0        | 0        | 0        | #N/A     | #N/A     | #N/A     | #N/A     | #N/A     | #N/A     |
| AT4G04105 | AT4G04105 | 0        | 3.568492 | 0        | 0.24831  | 0.662467 | 0        | 1.778607 | 0        | 0        | 0        | 0        | 0        | -0.19261 | NA       | -0.15633 | NA       | -0.46011 | NA       |
| AT4G04110 | AT4G04110 | 0        | 0        | 0        | 0        | 0        | 0        | 0        | 0        | 0        | 0        | 0        | 0        | #N/A     | #N/A     | #N/A     | #N/A     | #N/A     | #N/A     |
| AT4G04120 | AT4G04120 | 0        | 0        | 0        | 0        | 0        | 0        | 0        | 0        | 0        | 0        | 0        | 0        | #N/A     | #N/A     | #N/A     | #N/A     | #N/A     | #N/A     |
| AT4G04130 | AT4G04130 | 0        | 5.352738 | 5.150617 | 0        | 1.324935 | 0.996841 | 0        | 0        | 3.838143 | 1.330334 | 4.143626 | 0        | -0.93087 | 0.159276 | -1.27196 | 0.047247 | -0.01257 | NA       |
| AT4G04140 | AT4G04140 | 0        | 1.784246 | 1.287654 | 0        | 0        | 0        | 0.889303 | 1.07889  | 0        | 0        | 1.330334 | 1.035907 | -0.62052 | NA       | -0.12764 | NA       | -0.07949 | NA       |
| AT4G04145 | AT4G04145 | 0        | 0        | 0        | 0        | 0        | 0        | 1.778607 | 0        | 0        | 0        | 0        | 1.035907 | 0        | NA       | 0.26262  | NA       | 0.150298 | NA       |
| AT4G04150 | AT4G04150 | 0        | 0        | 0        | 0        | 0        | 0        | 0        | 0        | 0        | 0        | 0        | 0        | #N/A     | #N/A     | #N/A     | #N/A     | #N/A     | #N/A     |
| AT4G04155 | AT4G04155 | 0        | 0        | 0        | 0        | 0        | 0        | 0        | 0        | 0        | 0        | 0        | 0        | #N/A     | #N/A     | #N/A     | #N/A     | #N/A     | #N/A     |
| AT4G04157 | AT4G04157 | 1.188904 | 0        | 0        | 0        | 0.662467 | 0        | 1.778607 | 0        | 0        | 0        | 0        | 0        | -0.09734 | NA       | 0.091285 | NA       | -0.19961 | NA       |
| AT4G04165 | AT4G04165 | 0        | 0        | 0        | 0        | 0        | 0        | 0        | 0        | 0        | 0        | 0        | 0        | #N/A     | #N/A     | #N/A     | #N/A     | #N/A     | #N/A     |
| AT4G04167 | AT4G04167 | 0        | 0        | 0        | 0        | 0        | 0        | 0        | 1.07889  | 0        | 0        | 1.330334 | 0        | 0        | NA       | 0.160793 | NA       | 0.184979 | NA       |
| AT4G04170 | AT4G04170 | 0        | 0        | 1.287654 | 1.237247 | 0.662467 | 0.996841 | 0.889303 | 2.15778  | 1.952492 | 0        | 1.330334 | 1.035907 | 0.249416 | 0.73527  | 0.548966 | 0.430255 | 0.12912  | NA       |
| AT4G04175 | AT4G04175 | 0        | 0        | 0        | 0        | 0        | 0        | 0        | 0        | 0        | 0        | 0        | 0        | #N/A     | #N/A     | #N/A     | #N/A     | #N/A     | #N/A     |
| AT4G04180 | AT4G04180 | 34.47821 | 53.52738 | 41.20494 | 83.72036 | 94.07035 | 70.7757  | 80.03731 | 52.86561 | 64.43224 | 63.32935 | 47.89202 | 64.2262  | 0.928591 | 0.000453 | 0.605876 | 0.040525 | 0.447165 | 0.328743 |
| AT4G04190 | AT4G04190 | 14.26685 | 30.33218 | 27.04074 | 60.21267 | 60.28452 | 31.8989  | 49.80099 | 33.44559 | 40.02609 | 16.31211 | 23.94601 | 29.00538 | 1.037814 | 0.00433  | 0.73439  | 0.067001 | -0.02846 | 0.980154 |
| AT4G04200 | AT4G04200 | 122.4571 | 140.9554 | 133.9161 | 202.496  | 200.7276 | 180.4282 | 155.6281 | 166.1491 | 187.4392 | 138.1731 | 109.0874 | 168.8528 | 0.551544 | 0.003858 | 0.353177 | 0.098581 | 0.078423 | 0.865192 |
| AT4G04210 | PUX4      | 699.0755 | 835.0271 | 772.5926 | 810.3966 | 840.0085 | 814.4189 | 664.3097 | 628.9928 | 643.3461 | 804.0999 | 719.7107 | 667.1238 | 0.098347 | 0.488833 | -0.24584 | 0.063907 | -0.0691  | 0.792278 |
| AT4G04220 | AIRLP46   | 116.5126 | 139.1712 | 123.6148 | 142.2834 | 131.831  | 182.4219 | 133.3959 | 127.309  | 73.21845 | 103.6298 | 83.81104 | 87.01615 | 0.256362 | 0.344512 | -0.17065 | 0.582476 | -0.43721 | 0.271055 |
| AT4G04221 | AT4G04221 | 1.188904 | 0        | 1.287654 | 0        | 0        | 0        | 0.889303 | 0        | 0        | 0.959536 | 0        | 0        | -0.50188 | NA       | -0.26266 | NA       | -0.24426 | NA       |
| AT4G04223 | AT4G04223 | 67.76752 | 73.15409 | 79.83457 | 124.1371 | 136.4683 | 66.78833 | 51.5796  | 51.78672 | 78.09968 | 65.24842 | 57.20436 | 39.36445 | 0.552317 | 0.078127 | -0.26379 | 0.485376 | -0.41691 | 0.439841 |
| AT4G04230 | AT4G04230 | 1.188904 | 0        | 0        | 0        | 0        | 0        | 0        | 0        | 0        | 0        | 0        | 0        | -0.2184  | NA       | -0.20558 | NA       | -0.19918 | NA       |
| AT4G04245 | AT4G04245 | 0        | 0        | 0        | 0        | 0.662467 | 0        | 1.07889  | 0        | 0        | 0        | 0        | 0        | 0.098648 | NA       | 0.150881 | NA       | 0        | NA       |
| AT4G04250 | AT4G04250 | 0        | 0        | 0        | 0        | 0        | 0        | 0        | 1.07889  | 0        | 0        | 0        | 0        | 0        | NA       | 0.16673  | NA       | 0        | NA       |
| AT4G04255 | AT4G04255 | 0        | 0        | 0        | 0        | 0        | 0        | 0        | 0        | 0        | 0        | 0        | 1.035907 | 0        | NA       | 0        | NA       | 0.172362 | NA       |
| AT4G04260 | AT4G04260 | 2.377808 | 0        | 0        | 1.237247 | 0.662467 | 0        | 0.889303 | 0        | 0.976246 | 0        | 0        | 1.035907 | -0.05735 | NA       | -0.0945  | NA       | -0.23399 | NA       |
| AT4G04270 | AT4G04270 | 0        | 0        | 0        | 0        | 0        | 0        | 0        | 0        | 0        | 0        | 0        | 0        | #N/A     | #N/A     | #N/A     | #N/A     | #N/A     | #N/A     |
| AT4G04273 | AT4G04273 | 0        | 0        | 0        | 0        | 0        | 0.889303 | 0        | 0        | 0        | 0        | 0        | 0        | 0        | NA       | 0.160764 | NA       | 0        | NA       |
| AT4G04276 | AT4G04276 | 0        | 0        | 0        | 0        | 0.662467 | 0        | 0        | 0        | 0        | 0        | 0        | 0        | 0.128567 | NA       | 0        | NA       | 0        | NA       |
| AT4G04280 | AT4G04280 | 2.377808 | 0        | 1.287654 | 0.412416 | 0        | 0        | 0.889303 | 0        | 0        | 0        | 1.330334 | 0        | -0.56734 | NA       | -0.44408 | NA       | -0.39274 | NA       |
| AT4G04290 | AT4G04290 | 0        | 0        | 0.412416 | 0        | 0        | 0        | 0        | 0        | 0        | 2.660668 | 2.071813 | 0        | 0.045599 | NA       | 0        | NA       | 0.699894 | NA       |
| AT4G04293 | AT4G04293 | 26.15589 | 41.03766 | 36.05432 | 42.4788  | 52.99738 | 34.88943 | 21.34328 | 12.94668 | 14.64369 | 60.45074 | 61.19536 | 67.33392 | 0.35078  | 0.298596 | -0.94313 | 0.007326 | 0.84745  | 0.036266 |
| AT4G04296 | AT4G04296 | 1.188904 | 0        | 0        | 0        | 0        | 0        | 0        | 0        | 0        | 0        | 0        | 0        | -0.2184  | NA       | -0.20558 | NA       | -0.19918 | NA       |
| AT4G04300 | AT4G04300 | 0        | 1.784246 | 0        | 0        | 0        | 0        | 0        | 0        | 0        | 0        | 0        | 0        | -0.2184  | NA       | -0.20558 | NA       | -0.19918 | NA       |
| AT4G04310 | AT4G04310 | 0        | 0        | 0        | 0.412416 | 0        | 0        | 1.07889  | 0        | 0        | 0        | 1.330334 | 0        | 0.064033 | NA       | 0.167695 | NA       | 0.19372  | NA       |
| AT4G04313 | AT4G04313 | 0        | 0        | 0        | 0.662467 | 0        | 0.889303 | 0        | 0        | 0        | 0        | 0        | 1.035907 | 0.099976 | NA       | 0.14456  | NA       | 0.164373 | NA       |
| AT4G04315 | AT4G04315 | 0        | 0        | 0        | 0        | 0        | 0        | 0        | 0        | 0        | 0        | 0        | 0        | #N/A     | #N/A     | #N/A     | #N/A     | #N/A     | #N/A     |
| AT4G04316 | AT4G04316 | 0        | 0        | 0        | 0        | 0        | 0.889303 | 0        | 0        | 0        | 0        |          |          |          |          |          |          |          |          |

|           |            |           |          |          |          |          |          |          |          |          |          |          |          |          |          |          |          |          |           |
|-----------|------------|-----------|----------|----------|----------|----------|----------|----------|----------|----------|----------|----------|----------|----------|----------|----------|----------|----------|-----------|
| AT4G04530 | AT4G04530  | 0         | 0        | 0        | 0        | 0.662467 | 0.996841 | 0        | 0        | 0.976246 | 0        | 0        | 0        | 0.275104 | NA       | 0.163472 | NA       | 0        | NA        |
| AT4G04540 | CRK39      | 30.9115   | 46.3904  | 38.62963 | 74.64722 | 109.3071 | 83.73463 | 107.6057 | 74.44341 | 88.83839 | 12.47396 | 10.64267 | 22.78994 | 1.166405 | 4.95E-05 | 1.180983 | 5.34E-05 | -1.15335 | 0.007862  |
| AT4G04545 | AT4G04545  | 0         | 0        | 0        | 0        | 0        | 0        | 0.889303 | 0        | 0.889303 | 0        | 0        | 0        | 0        | NA       | 0.160764 | NA       | 0        | NA        |
| AT4G04547 | AT4G04547  | 1.188904  | 0        | 0        | 0        | 0        | 0.662467 | 0        | 0.889303 | 1.07889  | 0        | 0        | 0        | -0.11957 | NA       | 0.124631 | NA       | -0.23551 | 0         |
| AT4G04550 | AT4G04550  | 0         | 0        | 0        | 0        | 0        | 0        | 0        | 0        | 0        | 0        | 0        | 0        | #N/A     | #N/A     | #N/A     | #N/A     | #N/A     | #N/A      |
| AT4G04560 | AT4G04560  | 1.188904  | 0        | 1.287654 | 5.773818 | 8.612075 | 8.971567 | 5.335821 | 5.39445  | 10.73871 | 0        | 1.330334 | 1.035907 | 1.665509 | 0.005802 | 1.558486 | 0.013187 | -0.14746 | NA        |
| AT4G04570 | CRK40      | 439.8945  | 570.9587 | 449.3914 | 885.0438 | 914.2048 | 841.3336 | 709.6642 | 705.594  | 892.2888 | 258.1151 | 254.0938 | 343.921  | 0.844631 | 1.95E-07 | 0.652835 | 0.000108 | -0.74673 | 0.000236  |
| AT4G04580 | AT4G04580  | 0         | 0        | 0.412416 | 0.662467 | 0        | 0        | 0        | 0        | 0        | 0        | 0        | 0        | 0.196313 | NA       | 0        | NA       | 0        | NA        |
| AT4G04590 | AT4G04590  | 0         | 0        | 1.287654 | 0        | 0        | 0        | 0        | 0        | 0        | 0.959536 | 0        | 0        | -0.22221 | NA       | -0.2076  | NA       | -0.03666 | NA        |
| AT4G04600 | AT4G04600  | 2.377808  | 0        | 0        | 0        | 0        | 0        | 0.889303 | 0        | 0        | 0        | 0        | 0        | -0.41552 | NA       | -0.22014 | NA       | -0.19775 | NA        |
| AT4G04601 | AT4G04601  | 0         | 0        | 0        | 0        | 0        | 0        | 0        | 0        | 0        | 0        | 0        | 0        | #N/A     | #N/A     | #N/A     | #N/A     | #N/A     | #N/A      |
| AT4G04610 | APR1       | 1262.616  | 808.2635 | 1030.123 | 523.7678 | 476.314  | 450.572  | 393.0721 | 446.6604 | 455.9069 | 1103.466 | 1078.901 | 974.788  | -1.07676 | 8.92E-12 | -1.23935 | 5.39E-15 | 0.021971 | 0.961402  |
| AT4G04614 | AT4G04614  | 183.0912  | 235.5205 | 190.5728 | 299.8261 | 337.8583 | 274.1312 | 225.8831 | 226.5669 | 396.3559 | 189.9881 | 258.0848 | 216.5045 | 0.567232 | 0.101808 | 0.465971 | 0.068897 | 0.122121 | 0.815889  |
| AT4G04620 | ATG8B      | 115.3237  | 139.1712 | 131.3407 | 164.5538 | 180.1911 | 126.5988 | 132.5062 | 134.8612 | 174.748  | 103.6298 | 118.3997 | 137.7756 | 0.295806 | 0.198076 | 0.196319 | 0.453237 | -0.09288 | 0.853499  |
| AT4G04630 | AT4G04630  | 277.0146  | 246.226  | 262.6815 | 79.59621 | 98.70762 | 65.79149 | 142.2886 | 115.4412 | 122.0307 | 278.2653 | 351.2082 | 310.772  | -1.63793 | 4.68E-21 | -1.02502 | 9.24E-09 | 0.247922 | 0.414812  |
| AT4G04632 | AT4G04632  | 0         | 0        | 0        | 0        | 0        | 0        | 0        | 0        | 1.07889  | 0        | 0        | 0        | 0        | NA       | 0.16673  | NA       | 0        | NA        |
| AT4G04635 | AT4G04635  | 0         | 0        | 0        | 0        | 0        | 0        | 1.778607 | 0        | 0        | 0        | 0        | 0        | 0        | NA       | 0.248756 | NA       | 0        | NA        |
| AT4G04640 | ATPC1      | 13979.113 | 12901.88 | 12120.69 | 5746.186 | 6094.036 | 5698.939 | 8300.759 | 8259.981 | 9860.085 | 14062.95 | 17077.5  | 13069    | -1.13915 | 1.06E-19 | -0.55518 | 2.78E-05 | 0.178494 | 0.446008  |
| AT4G04650 | AT4G04650  | 0         | 0        | 0        | 0        | 0        | 0.996841 | 0        | 0        | 0        | 0        | 0        | 0        | 0.15625  | NA       | 0        | NA       | 0        | NA        |
| AT4G04653 | AT4G04653  | 0         | 0        | 0        | 0        | 0        | 0        | 0        | 0        | 0        | 0        | 0        | 0        | #N/A     | #N/A     | #N/A     | #N/A     | #N/A     | #N/A      |
| AT4G04655 | AT4G04655  | 0         | 1.784246 | 0        | 1.237247 | 0.662467 | 3.987363 | 1.778607 | 4.31556  | 0.976246 | 0        | 2.660668 | 2.071813 | 0.513567 | 0.468348 | 0.675175 | 0.341938 | 0.389594 | NA        |
| AT4G04660 | AT4G04660  | 1.188904  | 0        | 0        | 0        | 0        | 0        | 1.07889  | 0        | 0        | 0        | 0        | 0        | -0.24637 | NA       | -0.03098 | NA       | -0.02778 | NA        |
| AT4G04670 | AT4G04670  | 83.22328  | 60.66437 | 93.99877 | 67.63615 | 53.65985 | 70.7757  | 83.59453 | 87.39009 | 64.43224 | 69.08657 | 53.21336 | 88.05205 | -0.31271 | 0.273738 | -0.02921 | 0.937972 | -0.17363 | 0.750218  |
| AT4G04680 | AT4G04680  | 2.377808  | 3.568492 | 1.287654 | 2.474493 | 3.312336 | 1.993682 | 1.778607 | 1.07889  | 2.928738 | 1.919071 | 5.321336 | 0        | 0.101587 | 0.90452  | -0.13348 | 0.880296 | -0.01963 | NA        |
| AT4G04690 | FBX15      | 1.188904  | 0        | 0        | 0        | 0        | 0        | 0        | 0        | 0.959536 | 0        | 0        | 0        | -0.21179 | NA       | -0.19779 | NA       | -0.02864 | NA        |
| AT4G04692 | AT4G04692  | 863.1443  | 1015.236 | 1050.726 | 911.026  | 1145.406 | 935.0367 | 1282.376 | 1027.103 | 1757.243 | 1081.397 | 1414.145 | 953.034  | 0.029842 | 0.919226 | 0.459898 | 0.043787 | 0.227793 | 0.561708  |
| AT4G04693 | AT4G04693  | 1.188904  | 0        | 0        | 0        | 0        | 0        | 0.889303 | 0        | 0        | 0        | 0        | 0        | -0.20902 | NA       | -0.03919 | NA       | -0.19148 | NA        |
| AT4G04695 | CPK31      | 68.95643  | 49.95889 | 91.42346 | 134.0351 | 130.5061 | 157.5008 | 85.37313 | 94.94231 | 64.43224 | 48.93632 | 58.53469 | 64.2262  | 0.944436 | 0.000067 | 0.187312 | 0.554468 | -0.3014  | 0.525695  |
| AT4G04700 | CPK27      | 52.31177  | 48.17464 | 34.76667 | 51.96436 | 45.71024 | 67.78517 | 32.90423 | 39.91893 | 30.26363 | 26.867   | 45.23135 | 41.43626 | 0.264855 | 0.483334 | -0.36783 | 0.312607 | -0.24833 | 0.686454  |
| AT4G04710 | CPK22      | 3.566712  | 0        | 3.862963 | 12.78488 | 13.91181 | 7.97426  | 6.225124 | 10.7889  | 5.87476  | 5.757214 | 5.321336 | 8.287252 | 1.480471 | 0.007203 | 0.932727 | 0.136223 | 0.765868 | NA        |
| AT4G04720 | CPK21      | 397.0939  | 476.3937 | 422.3506 | 392.6196 | 344.483  | 421.6636 | 395.74   | 389.4793 | 329.9711 | 371.3403 | 278.0398 | 395.7163 | -0.15642 | 0.423495 | -0.20873 | 0.293221 | -0.29574 | 0.278942  |
| AT4G04730 | AT4G04730  | 0         | 0        | 0        | 0        | 0        | 0        | 0        | 0        | 0        | 0        | 0        | 0        | #N/A     | #N/A     | #N/A     | #N/A     | #N/A     | #N/A      |
| AT4G04740 | CPK23      | 313.8706  | 362.2019 | 333.5025 | 359.214  | 340.5082 | 444.591  | 490.0062 | 508.1572 | 306.5412 | 316.6468 | 304.6465 | 347.0287 | 0.174521 | 0.458469 | 0.3622   | 0.10315  | -0.05541 | 0.912004  |
| AT4G04745 | AT4G04745  | 3.566712  | 8.92123  | 6.438272 | 12.78488 | 13.91181 | 16.94629 | 9.782338 | 3.23667  | 21.47741 | 3.838143 | 5.321336 | 12.43088 | 0.925222 | 0.105168 | 0.661756 | 0.298125 | 0.150727 | NA        |
| AT4G04750 | AT4G04750  | 108.1903  | 114.1917 | 119.7519 | 77.53413 | 78.17114 | 68.78201 | 55.13682 | 60.41784 | 48.8123  | 145.8494 | 123.7211 | 118.0933 | -0.58139 | 0.003894 | -1.02492 | 9.84E-07 | 0.182016 | 0.631842  |
| AT4G04760 | AT4G04760  | 4.755616  | 7.136984 | 10.30123 | 6.598649 | 7.949607 | 6.977885 | 7.114428 | 10.7889  | 4.88123  | 5.757214 | 1.330334 | 1.434626 | -0.021   | 0.977208 | 0.032475 | 0.966695 | -0.64082 | NA        |
| AT4G04770 | ABC18      | 1830.912  | 1761.051 | 1695.841 | 1371.694 | 1509.763 | 1401.558 | 2038.284 | 1820.008 | 1831.437 | 1680.147 | 1732.095 | 1949.576 | -0.32026 | 0.006516 | 0.105134 | 0.430269 | 0.019906 | 0.946003  |
| AT4G04775 | AT4G04775  | 0         | 0        | 0        | 0        | 0        | 0        | 0        | 0        | 0        | 0        | 0        | 0        | #N/A     | #N/A     | #N/A     | #N/A     | #N/A     | #N/A      |
| AT4G04780 | MED21      | 82.03437  | 76.72258 | 72.10864 | 86.60727 | 96.05775 | 86.72515 | 92.48756 | 83.07453 | 109.3396 | 91.15588 | 70.5077  | 96.33931 | 0.213328 | 0.392567 | 0.293545 | 0.25126  | 0.163    | 0.721469  |
| AT4G04790 | AT4G04790  | 55.87849  | 42.8219  | 64.38272 | 62.68717 | 62.27192 | 63.79781 | 80.03731 | 56.10228 | 51.74104 | 64.69353 | 59.86503 | 67.33392 | 0.183016 | 0.553132 | 0.184043 | 0.580452 | 0.131738 | 0.825604  |
| AT4G04800 | MSR83      | 133.1572  | 140.9554 | 142.9296 | 299.8261 | 349.1203 | 247.2165 | 216.1007 | 208.2258 | 323.1374 | 151.6066 | 179.5951 | 171.9692 | 1.07456  | 1.62E-07 | 0.185853 | 0.000148 | 0.258728 | 0.516678  |
| AT4G04810 | MSR84      | 17.83356  | 24.97944 | 20.60247 | 16.90904 | 11.92441 | 9.968408 | 9.782338 | 12.94668 | 6.833722 | 31.66468 | 27.93701 | 26.93357 | -0.5662  | 0.180369 | -0.94207 | 0.033435 | 0.436714 | 0.52809   |
| AT4G04820 | AT4G04820  | 0         | 0        | 0        | 0        | 0        | 0        | 0        | 0        | 0        | 0        | 0        | 0        | #N/A     | #N/A     | #N/A     | #N/A     | #N/A     | #N/A      |
| AT4G04830 | MSR85      | 203.3026  | 176.6404 | 189.2852 | 165.3786 | 172.2415 | 123.6083 | 88.90305 | 71.20674 | 128.8645 | 260.0342 | 308.6375 | 231.0072 | -0.28797 | 0.242316 | -0.94216 | 0.000034 | 0.469795 | 0.155993  |
| AT4G04840 | MSR86      | 557.596   | 692.2875 | 730.1    | 452.0075 | 429.2788 | 498.4204 | 702.5498 | 558.865  | 785.878  | 1147.605 | 1221.247 | 1084.594 | -0.51253 | 0.001632 | 0.050048 | 0.825187 | 0.790432 | 0.909E-06 |
| AT4G04850 | KEA3       | 1062.88   | 977.7668 | 1005.658 | 807.0973 | 890.356  | 857.2831 | 1116.076 | 990.421  | 738.042  | 1008.472 | 1156.06  | 1138.461 | -0.25113 | 0.137483 | -0.09758 | 0.631709 | 0.113515 | 0.721971  |
| AT4G04860 | DER2.2     | 215.1916  | 253.3629 | 242.079  | 261.0591 | 268.2992 | 283.1028 | 253.4515 | 279.4325 | 271.3964 | 180.3927 | 203.5411 | 196.8222 | 0.193006 | 0.221449 | 0.180986 | 0.289231 | -0.28425 | 0.277591  |
| AT4G04870 | CLS        | 53.50068  | 67.80135 | 60.51975 | 50.3147  | 54.98478 | 48.8452  | 54.24751 | 55.02339 | 45.88356 | 47.97678 | 43.90102 | 44.54398 | -0.21322 | 0.450825 | -0.20667 | 0.050121 | -0.38004 | 0.327809  |
| AT4G04880 | AT4G04880  | 173.58    | 208.7568 | 207.3123 | 254.8728 | 278.2363 | 268.1502 | 290.8022 | 250.3025 | 198.1779 | 233.1672 | 216.8444 | 207.1813 | 0.436636 | 0.015085 | 0.325475 | 0.980286 | 0.15842  | 0.651245  |
| AT4G04885 | PCF54      | 310.3039  | 289.0479 | 265.2568 | 216.9306 | 172.904  | 229.2734 | 124.3221 | 282.6692 | 199.3917 | 259.0746 | 251.4331 | 265.1921 | -0.47401 | 0.011326 | -0.32882 | 0.109461 | -0.15265 | 0.676985  |
| AT4G04890 | PDF2       | 1211.493  | 1216.856 | 977.3296 | 602.5392 | 626.0316 | 734.6717 | 642.9664 | 772.4852 | 663.8473 | 1060.287 | 1174.685 | 1040.05  | -0.78641 | 1.13E-08 | -0.70196 | 5.84E-07 | -0.05549 | 0.869018  |
| AT4G04900 | RIC10      | 2.377808  | 1.784246 | 2.575309 | 6.598649 | 4.637271 | 1.993682 | 7.114428 | 0        | 1.952492 | 0.959536 | 2.660668 | 3.10772  | 0.578806 | 0.418155 | 0.220404 | 0.798682 | -0.03389 | NA        |
| AT4G04910 | NSF        | 634.8747  | 435.356  | 486.7333 | 464.3799 | 553.8226 | 563.215  | 678.5386 | 628.9928 | 553.5315 | 508.5539 | 488.2326 | 503.4506 | 0.013544 | 0.953335 | 0.24775  | 0.188171 | -0.05752 | 0.883146  |
| AT4G04920 | MED16      | 218.7583  | 258.7157 | 169.9704 | 239.201  | 226.5638 | 247.2165 | 247.2264 | 310.7203 | 184.5105 | 180.3927 | 188.9074 | 204.0736 | 0.141412 | 0.575415 | 0.197059 | 0.44452  | -0.16295 | 0.704153  |
| AT4G04925 | AT4G04925  | 45.17835  | 57.09587 | 45.0679  | 42.4788  | 39.74804 | 50.83888 | 29.34701 | 36.68226 | 74.1947  | 44.13864 | 33.25835 | 38.32854 | -0.13405 | 0.749537 | -0.05684 | 0.904452 | -0.30306 | 0.640446  |
| AT4G04930 | DES-1-LIKE | 0         |          |          |          |          |          |          |          |          |          |          |          |          |          |          |          |          |           |







|           |           |          |          |          |          |          |          |          |          |          |          |          |          |          |          |          |          |          |          |
|-----------|-----------|----------|----------|----------|----------|----------|----------|----------|----------|----------|----------|----------|----------|----------|----------|----------|----------|----------|----------|
| AT4G06605 | AT4G06605 | 1.188904 | 0        | 0        | 0        | 0        | 0        | 2.66791  | 0        | 0        | 0        | 1.330334 | 0        | -0.24033 | NA       | 0.206745 | NA       | -0.00811 | NA       |
| AT4G06606 | AT4G06606 | 1.188904 | 0        | 0        | 0        | 0        | 0        | 0        | 0        | 0        | 0        | 0        | 0        | -0.2184  | NA       | -0.20558 | NA       | -0.19918 | NA       |
| AT4G06607 | AT4G06607 | 0        | 1.784246 | 0        | 0        | 0.662467 | 0        | 0        | 0        | 0        | 0        | 0        | 0        | -0.12017 | NA       | -0.24312 | NA       | -0.23848 | NA       |
| AT4G06608 | AT4G06608 | 0        | 0        | 0        | 0.412416 | 0        | 0        | 2.66791  | 0        | 0        | 0        | 0        | 0        | 0.052837 | NA       | 0.37323  | NA       | 0        | NA       |
| AT4G06609 | AT4G06609 | 0        | 0        | 0        | 0        | 0        | 0        | 0.889303 | 0        | 0.959536 | 0        | 0        | 0        | 0        | NA       | 0.13694  | NA       | 0.147196 | NA       |
| AT4G06610 | AT4G06610 | 0        | 0        | 0        | 0        | 0        | 0        | 0        | 0        | 0        | 0        | 0        | 0        | #N/A     | #N/A     | #N/A     | #N/A     | #N/A     | #N/A     |
| AT4G06611 | AT4G06611 | 0        | 0        | 0        | 0        | 0        | 0        | 0        | 0        | 0        | 0        | 0        | 0        | #N/A     | #N/A     | #N/A     | #N/A     | #N/A     | #N/A     |
| AT4G06612 | AT4G06612 | 0        | 0        | 0        | 0        | 0        | 0        | 0        | 0        | 0        | 0        | 0        | 0        | #N/A     | #N/A     | #N/A     | #N/A     | #N/A     | #N/A     |
| AT4G06613 | AT4G06613 | 0        | 0        | 0        | 0        | 0        | 0        | 0        | 0        | 0        | 0        | 0        | 1.035907 | 0        | NA       | 0        | NA       | 0.172362 | NA       |
| AT4G06614 | AT4G06614 | 0        | 0        | 0        | 0        | 0        | 0        | 0        | 0        | 0        | 0        | 0        | 1.035907 | 0        | NA       | 0        | NA       | 0.172362 | NA       |
| AT4G06615 | AT4G06615 | 0        | 0        | 0        | 0.412416 | 0.662467 | 0        | 0        | 0        | 0        | 0        | 0        | 0        | 0.196313 | NA       | 0        | NA       | 0        | NA       |
| AT4G06616 | AT4G06616 | 0        | 0        | 0        | 0        | 0        | 0        | 0        | 0.976246 | 0        | 0        | 0        | 0        | 0        | NA       | 0.16673  | NA       | 0        | NA       |
| AT4G06617 | AT4G06617 | 1.188904 | 0        | 0        | 0        | 0        | 0        | 1.07889  | 0        | 0        | 0        | 1.330334 | 0        | -0.24973 | NA       | -0.03207 | NA       | -0.00489 | NA       |
| AT4G06618 | AT4G06618 | 0        | 0        | 0        | 0        | 0        | 0        | 0        | 0        | 0        | 0        | 0        | 0        | #N/A     | #N/A     | #N/A     | #N/A     | #N/A     | #N/A     |
| AT4G06619 | AT4G06619 | 0        | 0        | 0        | 0        | 0        | 0        | 0        | 0        | 0        | 0        | 0        | 0        | #N/A     | #N/A     | #N/A     | #N/A     | #N/A     | #N/A     |
| AT4G06620 | AT4G06620 | 0        | 0        | 0        | 0        | 0        | 0        | 0.889303 | 0        | 0        | 0        | 0        | 0        | 0        | NA       | 0.160764 | NA       | 0        | NA       |
| AT4G06621 | AT4G06621 | 1.188904 | 0        | 0        | 0        | 0        | 0        | 0        | 0        | 0        | 0        | 0        | 0        | -0.2184  | NA       | -0.20558 | NA       | -0.19918 | NA       |
| AT4G06622 | AT4G06622 | 1.188904 | 0        | 0        | 0        | 0        | 0        | 0.889303 | 1.07889  | 0        | 0        | 0        | 0        | -0.26887 | NA       | 0.130815 | NA       | -0.23129 | NA       |
| AT4G06623 | AT4G06623 | 0        | 0        | 0        | 0        | 0        | 0        | 0        | 0        | 0        | 0        | 0        | 0        | #N/A     | #N/A     | #N/A     | #N/A     | #N/A     | #N/A     |
| AT4G06624 | AT4G06624 | 0        | 0        | 0        | 0        | 0        | 0        | 0.889303 | 1.07889  | 0        | 0        | 0        | 0        | 0        | NA       | 0.3225   | NA       | 0        | NA       |
| AT4G06625 | AT4G06625 | 0        | 0        | 0        | 0        | 0        | 0        | 0        | 0        | 0        | 0        | 0        | 0        | #N/A     | #N/A     | #N/A     | #N/A     | #N/A     | #N/A     |
| AT4G06626 | AT4G06626 | 2.377808 | 0        | 1.287654 | 0        | 0.662467 | 0        | 0.889303 | 1.07889  | 0        | 0        | 0        | 1.035907 | -0.55485 | NA       | -0.26835 | NA       | -0.42684 | NA       |
| AT4G06627 | AT4G06627 | 0        | 0        | 0        | 0        | 0        | 0        | 0.889303 | 0        | 0        | 0        | 0        | 0        | 0        | NA       | 0.160764 | NA       | 0        | NA       |
| AT4G06628 | AT4G06628 | 0        | 0        | 0        | 0        | 0        | 0        | 0.889303 | 0        | 0        | 0        | 1.330334 | 2.071813 | 0        | NA       | 0.154508 | NA       | 0.530386 | NA       |
| AT4G06629 | AT4G06629 | 0        | 0        | 0        | 0        | 0        | 0        | 0        | 0        | 0        | 0        | 0        | 0        | #N/A     | #N/A     | #N/A     | #N/A     | #N/A     | #N/A     |
| AT4G06630 | AT4G06630 | 1.188904 | 0        | 0        | 0        | 0        | 0        | 0        | 0        | 0        | 0        | 0        | 0        | -0.2184  | NA       | -0.20558 | NA       | -0.19918 | NA       |
| AT4G06631 | AT4G06631 | 1.188904 | 0        | 0        | 0        | 0        | 0        | 0        | 0        | 0        | 0        | 0        | 0        | -0.2184  | NA       | -0.20558 | NA       | -0.19918 | NA       |
| AT4G06632 | AT4G06632 | 0        | 1.784246 | 1.287654 | 0        | 0        | 0        | 0        | 0        | 0        | 0        | 0        | 0        | -0.50693 | NA       | -0.48251 | NA       | -0.47569 | NA       |
| AT4G06633 | AT4G06633 | 0        | 0        | 0        | 0.412416 | 0        | 0        | 0.889303 | 0        | 0        | 0        | 0        | 0        | 0.066991 | NA       | 0.136991 | NA       | 0        | NA       |
| AT4G06634 | AT4G06634 | 173.58   | 174.8561 | 173.8333 | 231.3651 | 216.6268 | 198.3713 | 193.8682 | 213.6202 | 231.3703 | 199.5834 | 223.4961 | 171.9605 | 0.30906  | 0.077743 | 0.28413  | 0.13208  | 0.179444 | 0.570758 |
| AT4G06635 | AT4G06635 | 1.188904 | 0        | 0        | 0        | 0        | 0        | 0        | 0        | 0        | 0        | 0        | 0        | -0.2184  | NA       | -0.20558 | NA       | -0.19918 | NA       |
| AT4G06636 | AT4G06636 | 0        | 0        | 0        | 0        | 0        | 0        | 1.07889  | 0        | 0        | 0        | 1.330334 | 1.035907 | 0        | NA       | 0.179864 | NA       | 0.38345  | NA       |
| AT4G06637 | AT4G06637 | 0        | 1.784246 | 0        | 0        | 0        | 0        | 0.889303 | 0        | 0        | 0        | 0        | 0        | -0.26522 | NA       | -0.08117 | NA       | -0.24296 | NA       |
| AT4G06638 | AT4G06638 | 0        | 0        | 0        | 0        | 0        | 0        | 0        | 0        | 0        | 0        | 0        | 0        | #N/A     | #N/A     | #N/A     | #N/A     | #N/A     | #N/A     |
| AT4G06639 | AT4G06639 | 0        | 0        | 0        | 0        | 0        | 0        | 0        | 0        | 0        | 0        | 0        | 0        | #N/A     | #N/A     | #N/A     | #N/A     | #N/A     | #N/A     |
| AT4G06640 | AT4G06640 | 1.188904 | 0        | 0        | 0        | 0        | 0        | 0.889303 | 1.07889  | 0        | 0        | 0        | 0        | -0.26887 | NA       | 0.130815 | NA       | -0.23129 | NA       |
| AT4G06641 | AT4G06641 | 0        | 0        | 0        | 0        | 0        | 0        | 0.889303 | 0        | 0        | 0        | 0        | 0        | 0        | NA       | 0.160764 | NA       | 0        | NA       |
| AT4G06642 | AT4G06642 | 1.188904 | 0        | 0        | 0        | 0        | 0        | 0        | 0        | 1.919071 | 0        | 1.035907 | 0        | -0.28202 | NA       | -0.24512 | NA       | 0.288197 | NA       |
| AT4G06644 | AT4G06644 | 0        | 1.784246 | 0        | 0        | 0        | 0        | 0        | 0        | 0        | 0        | 1.330334 | 0        | -0.27254 | NA       | -0.25305 | NA       | -0.03925 | NA       |
| AT4G06646 | AT4G06646 | 0        | 0        | 0        | 0        | 0        | 0        | 0        | 0        | 0        | 0        | 0        | 0        | #N/A     | #N/A     | #N/A     | #N/A     | #N/A     | #N/A     |
| AT4G06648 | AT4G06648 | 0        | 0        | 0        | 0        | 0        | 0        | 0.889303 | 0        | 0        | 0        | 2.660668 | 0        | 0        | NA       | 0.134892 | NA       | 0.345705 | NA       |
| AT4G06650 | AT4G06650 | 0        | 1.784246 | 0        | 0        | 0        | 0        | 0        | 0        | 0        | 0        | 0        | 0        | -0.2184  | NA       | -0.20558 | NA       | -0.19918 | NA       |
| AT4G06652 | AT4G06652 | 0        | 0        | 0        | 0        | 0        | 0        | 0.889303 | 0        | 0        | 0        | 0        | 0        | 0        | NA       | 0.160764 | NA       | 0        | NA       |
| AT4G06654 | AT4G06654 | 0        | 0        | 1.287654 | 0        | 0        | 0        | 0        | 0        | 0        | 0        | 0        | 1.035907 | -0.22368 | NA       | -0.20864 | NA       | -0.02973 | NA       |
| AT4G06656 | AT4G06656 | 1.188904 | 1.784246 | 0        | 0        | 0        | 0        | 3.557214 | 1.07889  | 1.952492 | 0        | 2.660668 | 0        | -0.63119 | 0.308747 | 0.520937 | 0.446696 | -0.0666  | NA       |
| AT4G06658 | AT4G06658 | 0        | 1.784246 | 0        | 0        | 0        | 0        | 1.778607 | 0        | 0        | 0        | 0        | 0        | -0.25988 | NA       | 0.05432  | NA       | -0.23333 | NA       |
| AT4G06660 | AT4G06660 | 0        | 0        | 0        | 0        | 0        | 0        | 1.778607 | 1.07889  | 0        | 0        | 0        | 0        | 0        | NA       | 0.460477 | NA       | 0        | NA       |
| AT4G06664 | AT4G06664 | 1.188904 | 1.784246 | 0        | 0        | 0        | 0        | 0.889303 | 1.07889  | 0        | 0        | 1.330334 | 2.071813 | -0.61166 | NA       | -0.12506 | NA       | 0.095423 | NA       |
| AT4G06666 | AT4G06666 | 2.377808 | 0        | 0        | 0.412416 | 0.662467 | 0        | 0        | 1.07889  | 0.976246 | 0        | 0        | 1.035907 | -0.24325 | NA       | -0.07562 | NA       | -0.23827 | NA       |
| AT4G06668 | AT4G06668 | 0        | 1.784246 | 0        | 0        | 0        | 0        | 0.889303 | 0        | 0        | 0        | 0        | 0        | -0.26522 | NA       | -0.08117 | NA       | -0.24296 | NA       |
| AT4G06670 | AT4G06670 | 0        | 1.784246 | 0        | 0        | 0.996841 | 1.778607 | 0        | 0        | 0        | 0        | 0        | 0        | -0.10411 | NA       | 0.05052  | NA       | -0.23903 | NA       |
| AT4G06672 | AT4G06672 | 0        | 0        | 0        | 0        | 0        | 0        | 0        | 0        | 0        | 0        | 0        | 0        | #N/A     | #N/A     | #N/A     | #N/A     | #N/A     | #N/A     |
| AT4G06674 | AT4G06674 | 0        | 0        | 0        | 0        | 0        | 0        | 0        | 0        | 0.959536 | 0        | 0        | 0        | 0        | NA       | 0        | NA       | 0.171512 | NA       |
| AT4G06676 | AT4G06676 | 74.90095 | 62.44861 | 57.94445 | 127.4364 | 115.9318 | 121.6146 | 98.71269 | 88.46897 | 94.69586 | 68.12703 | 94.45371 | 59.04667 | 0.868613 | 6.99E-05 | 0.504161 | 0.041853 | 0.150647 | 0.764564 |
| AT4G06678 | AT4G06678 | 0        | 0        | 0        | 0        | 0        | 0        | 0        | 0        | 0        | 0        | 1.330334 | 0        | 0        | NA       | 0        | NA       | 0.172362 | NA       |
| AT4G06680 | AT4G06680 | 0        | 0        | 0        | 0        | 0        | 0.889303 | 0        | 0        | 0        | 0        | 1.330334 | 0        | 0        | NA       | 0.141773 | NA       | 0.183636 | NA       |
| AT4G06682 | AT4G06682 | 0        | 0        | 0        | 0        | 1.324935 | 0        | 0        | 1.07889  | 0        | 0        | 0        | 0        | 0.195296 | NA       | 0.144258 | NA       | 0        | NA       |
| AT4G06684 | AT4G06684 | 0        | 0        | 0        | 0.662467 | 0        | 0        | 0        | 0        | 0        | 0        | 0        | 0        | 0.128567 | NA       | 0        | NA       | 0        | NA       |
| AT4G06686 | AT4G06686 | 1.188904 | 0        | 0        | 0        | 0.996841 | 0        | 1.07889  | 2.928738 | 0        | 0        | 0        | 0        | -0.10049 | NA       | 0.390898 | NA       | -0.23037 | NA       |
| AT4G06688 | AT4G06688 | 0        | 0        | 0        | 0.662467 | 0        | 0.889303 | 0        | 0        | 0        | 0        | 1.330334 | 0        | 0.09913  | NA       | 0.145297 | NA       | 0.18929  | NA       |
| AT4G06692 | AT4G06692 | 2.377808 | 0        | 0        | 0.412416 | 0        | 0        | 0        | 0        | 0        | 0        | 0        | 2.660668 | -0.30775 | NA       | -0.37335 | NA       | 0.001537 | NA       |
| AT4G06694 | AT4G06694 | 0        | 0        | 0        | 0        | 0        | 0        | 0        | 0        | 0        | 0        | 0        | 0        | #N/A     | #N/A     | #N/A     | #N/A     | #N/A     | #N/A     |
| AT4G06696 | AT4G06696 | 0        | 0        | 0        | 0        | 0        | 0        | 0        | 0        | 0        | 0        | 1.330334 | 0        | 0        | NA       | 0        | NA       | 0.172362 | NA       |
| AT4G06697 | AT4G06697 | 0        | 0        | 0        | 0        | 0        | 0.889303 | 0        | 0        | 0        | 0        | 0        | 0        | 0        | NA       | 0.160764 | NA       | 0        | NA       |
| AT4G06698 | AT4G06698 | 0        | 0        | 0        | 0.996841 | 0        | 0        | 0        | 0        | 0        | 0        | 0        | 0        | 0.15625  | NA       | 0        | NA       | 0        | NA       |
| AT4G06699 | AT4G06699 | 0        | 0        | 0        | 0.412416 | 0        | 0        | 0.889303 | 0        | 0        | 0        | 0        | 1.035907 | 0.066177 | NA       | 0.148539 | NA       | 0.168189 | NA       |
| AT4G06700 | AT4G06700 | 1.188904 | 1.784246 | 0        | 0.412416 | 0.662467 | 0.996841 | 7.114428 | 4.31556  | 0.976246 | 0.959536 | 5.321336 | 2.071813 | -0.27331 | 0.726264 | 0.995671 | 0.148288 | 0.588475 | NA       |
| AT4G06701 | AT4G06701 | 58.25629 | 53.52738 | 81.12222 | 87.4321  | 86.78321 | 74.76306 | 64.02985 | 47.47116 | 67.36097 | 66.20796 | 74.4987  | 71.47755 | 0.353008 | 0.171413 | -0.11072 | 0.742138 | 0.116691 | 0.836577 |
| AT4G06702 | AT4G06702 | 0        | 0        | 0        | 0        | 0        | 0        | 0        | 0        | 0        | 0        | 0        | 0        | #N/A     | #N/A     | #N/A     | #N/A     | #N/A     | #N/A     |
| AT4G06704 | AT4G06704 | 0        | 0        | 0        | 0        | 0.996841 | 0        | 0        | 0        | 0.959536 | 0        | 0        | 0        | 0.134417 | NA       | 0        | NA       | 0.144669 | NA       |
| AT4G06708 | AT4G06708 | 0        | 0        | 0        | 0.662467 | 0        | 0        | 0        | 0        | 0        | 0        | 1.330334 | 2.071813 | 0.095043 | NA       | 0        | NA       | 0.524051 | NA       |
| AT4G06710 | AT4G06710 | 0        | 0        | 0        | 0        | 0        | 0        | 0        | 0        | 0        | 0        | 0        | 0        | #N/A     | #N/A     | #N/A     | #N/A     | #N/A     | #N/A     |
| AT4G06712 | AT4G06712 | 1.188904 | 0        | 0        | 0.662467 | 0.996841 | 1.778607 | 0        | 0.976246 | 0        | 0        | 1.330334 | 1.035907 | -0.00303 | NA       | 0.246805 | NA       | 0.149322 | NA       |
| AT        |           |          |          |          |          |          |          |          |          |          |          |          |          |          |          |          |          |          |          |

|           |           |          |          |          |          |          |          |          |          |          |          |          |          |          |          |          |          |          |          |
|-----------|-----------|----------|----------|----------|----------|----------|----------|----------|----------|----------|----------|----------|----------|----------|----------|----------|----------|----------|----------|
| AT4G07338 | AT4G07338 | 0        | 0        | 0        | 0        | 0        | 0        | 0        | 1.07889  | 0        | 0        | 0        | 2.071813 | 0        | NA       | 0.150233 | NA       | 0.295662 | NA       |
| AT4G07339 | AT4G07339 | 0        | 0        | 0        | 0        | 1.324935 | 0        | 0        | 0        | 0        | 0        | 0        | 0        | 0.21675  | NA       | 0        | NA       | 0        | NA       |
| AT4G07340 | AT4G07340 | 0        | 0        | 0        | 0        | 0        | 0        | 0        | 0        | 0.976246 | 0        | 0        | 0        | 0        | 0        | 0        | NA       | 0        | NA       |
| AT4G07350 | AT4G07350 | 0        | 0        | 0        | 0        | 0        | 0        | 0        | 0        | 0        | 0        | 0        | 0        | #N/A     | #N/A     | #N/A     | #N/A     | #N/A     | #N/A     |
| AT4G07355 | AT4G07355 | 0        | 0        | 0        | 0        | 0        | 0        | 0        | 0        | 0        | 0        | 0        | 0        | #N/A     | #N/A     | #N/A     | #N/A     | #N/A     | #N/A     |
| AT4G07360 | AT4G07360 | 0        | 0        | 0        | 0        | 0        | 0        | 1.778607 | 0        | 0        | 0.959536 | 0        | 0        | 0        | NA       | 0.262373 | NA       | 0.143228 | NA       |
| AT4G07370 | AT4G07370 | 1.188904 | 0        | 0        | 0        | 0        | 0        | 0        | 0        | 0.976246 | 0        | 1.330334 | 1.035907 | -0.29801 | NA       | -0.05307 | NA       | 0.16706  | NA       |
| AT4G07380 | AT4G07380 | 0        | 0        | 0        | 0        | 0        | 0        | 0        | 1.07889  | 0        | 0        | 0        | 0        | 0        | NA       | 0.16673  | NA       | 0        | NA       |
| AT4G07390 | AT4G07390 | 214.0027 | 305.1061 | 283.284  | 406.2293 | 457.7649 | 430.6352 | 441.0945 | 356.0337 | 443.2157 | 293.6179 | 200.8804 | 263.1203 | 0.680438 | 0.000202 | 0.621657 | 0.00101  | -0.06827 | 0.879579 |
| AT4G07400 | F8L       | 47.55616 | 39.25341 | 55.36914 | 49.07745 | 51.67245 | 47.84836 | 47.13308 | 70.12785 | 83.95716 | 47.01725 | 43.90102 | 54.90305 | 0.047163 | 0.901523 | 0.457843 | 0.142568 | 0.025088 | 0.976106 |
| AT4G07408 | AT4G07408 | 0        | 0        | 0        | 2.062078 | 0.662467 | 0.996841 | 4.446517 | 7.55223  | 12.6912  | 2.878607 | 0        | 1.035907 | 0.498482 | 0.490126 | 2.152191 | 0.00041  | 0.573956 | NA       |
| AT4G07410 | AT4G07410 | 782.2988 | 674.445  | 737.8259 | 482.9386 | 533.9486 | 560.2245 | 645.6343 | 636.5451 | 574.0326 | 601.6288 | 606.6323 | 701.3087 | -0.47834 | 0.000169 | -0.24164 | 0.091051 | -0.20059 | 0.351195 |
| AT4G07415 | AT4G07415 | 1.188904 | 3.568492 | 0        | 0        | 0.662467 | 0        | 0.889303 | 0        | 0        | 0        | 0        | 0        | -0.56999 | NA       | -0.49462 | NA       | -0.67322 | NA       |
| AT4G07420 | AT4G07420 | 0        | 0        | 0        | 0        | 0        | 0        | 0        | 0        | 0        | 0        | 0        | 0        | #N/A     | #N/A     | #N/A     | #N/A     | #N/A     | #N/A     |
| AT4G07425 | AT4G07425 | 0        | 0        | 0        | 0        | 0        | 0        | 0        | 0        | 0        | 0        | 0        | 0        | #N/A     | #N/A     | #N/A     | #N/A     | #N/A     | #N/A     |
| AT4G07430 | AT4G07430 | 0        | 0        | 0        | 0        | 0        | 0        | 0        | 0        | 0        | 0        | 0        | 0        | #N/A     | #N/A     | #N/A     | #N/A     | #N/A     | #N/A     |
| AT4G07435 | AT4G07435 | 1.188904 | 0        | 0        | 0        | 0        | 0        | 0        | 0        | 0        | 0        | 0        | 0        | -0.2184  | NA       | -0.20558 | NA       | -0.19918 | NA       |
| AT4G07440 | AT4G07440 | 0        | 1.784246 | 0        | 0        | 0        | 0        | 0        | 0        | 0        | 0        | 0        | 0        | -0.2184  | NA       | -0.20558 | NA       | -0.19918 | NA       |
| AT4G07450 | AT4G07450 | 1.188904 | 0        | 0        | 0        | 0        | 0        | 0.889303 | 0        | 0        | 0        | 0        | 0        | -0.20902 | NA       | -0.03919 | NA       | -0.19148 | NA       |
| AT4G07452 | AT4G07452 | 0        | 0        | 0        | 0        | 0        | 0        | 0        | 0        | 0        | 0        | 0        | 0        | #N/A     | #N/A     | #N/A     | #N/A     | #N/A     | #N/A     |
| AT4G07454 | AT4G07454 | 0        | 0        | 0        | 0        | 0        | 0        | 0        | 1.07889  | 0        | 0        | 0        | 0        | 0        | NA       | 0.16673  | NA       | 0        | NA       |
| AT4G07456 | AT4G07456 | 0        | 0        | 0        | 0.412416 | 0        | 0        | 0        | 0        | 0        | 0        | 1.330334 | 0        | 0.067751 | NA       | 0        | NA       | 0.180865 | NA       |
| AT4G07458 | AT4G07458 | 0        | 0        | 0        | 0        | 0.662467 | 0        | 0        | 0        | 0        | 0        | 0        | 2.071813 | 0.092091 | NA       | 0        | NA       | 0.290617 | NA       |
| AT4G07460 | AT4G07460 | 0        | 0        | 0        | 0        | 0        | 0        | 0        | 0        | 0        | 0        | 0        | 0        | #N/A     | #N/A     | #N/A     | #N/A     | #N/A     | #N/A     |
| AT4G07470 | AT4G07470 | 0        | 0        | 0        | 0        | 0        | 0        | 0        | 0        | 0        | 0        | 0        | 0        | #N/A     | #N/A     | #N/A     | #N/A     | #N/A     | #N/A     |
| AT4G07475 | AT4G07475 | 0        | 0        | 0        | 0.412416 | 0        | 0        | 0        | 0        | 0        | 0        | 1.330334 | 0        | 0.067751 | NA       | 0        | NA       | 0.180865 | NA       |
| AT4G07480 | AT4G07480 | 0        | 0        | 0        | 0        | 0        | 0        | 0        | 0        | 0        | 0        | 0        | 0        | #N/A     | #N/A     | #N/A     | #N/A     | #N/A     | #N/A     |
| AT4G07485 | AT4G07485 | 0        | 0        | 0        | 0        | 0        | 0        | 0        | 0        | 0        | 0        | 0        | 0        | #N/A     | #N/A     | #N/A     | #N/A     | #N/A     | #N/A     |
| AT4G07490 | AT4G07490 | 1.188904 | 0        | 0        | 0        | 0        | 0        | 0        | 0        | 0        | 0        | 0        | 0        | -0.2184  | NA       | -0.20558 | NA       | -0.19918 | NA       |
| AT4G07491 | AT4G07491 | 1.188904 | 0        | 0        | 0.412416 | 0        | 0        | 0.889303 | 0        | 0        | 0        | 1.330334 | 1.035907 | -0.18223 | NA       | -0.06717 | NA       | 0.165081 | NA       |
| AT4G07492 | AT4G07492 | 0        | 0        | 0        | 0        | 0        | 0        | 0        | 0        | 0        | 0        | 2.660668 | 1.035907 | 0        | NA       | 0        | NA       | 0.551716 | NA       |
| AT4G07493 | AT4G07493 | 0        | 0        | 0        | 0        | 0        | 0        | 0        | 0        | 0        | 0        | 0        | 0        | #N/A     | #N/A     | #N/A     | #N/A     | #N/A     | #N/A     |
| AT4G07494 | AT4G07494 | 0        | 0        | 0        | 0        | 0        | 0        | 0        | 0        | 0        | 0        | 0        | 1.035907 | 0        | NA       | 0        | NA       | 0.172362 | NA       |
| AT4G07495 | AT4G07495 | 1.188904 | 0        | 0        | 0        | 0        | 0.996841 | 0        | 0        | 0        | 0        | 1.330334 | 1.035907 | -0.08776 | NA       | -0.24883 | NA       | 0.163739 | NA       |
| AT4G07496 | AT4G07496 | 0        | 0        | 0        | 0        | 0        | 0        | 0        | 0        | 0        | 0        | 0        | 0        | #N/A     | #N/A     | #N/A     | #N/A     | #N/A     | #N/A     |
| AT4G07498 | AT4G07498 | 0        | 0        | 0        | 0        | 0        | 0        | 0        | 0        | 0        | 0        | 0        | 0        | #N/A     | #N/A     | #N/A     | #N/A     | #N/A     | #N/A     |
| AT4G07500 | AT4G07500 | 0        | 0        | 0        | 0        | 0        | 0        | 0        | 0        | 0        | 0        | 2.660668 | 0        | 0        | NA       | 0        | NA       | 0.322821 | NA       |
| AT4G07502 | AT4G07502 | 0        | 0        | 1.287654 | 0        | 0        | 0        | 0        | 0        | 0        | 0.959536 | 0        | 0        | -0.22221 | NA       | -0.2076  | NA       | -0.03666 | NA       |
| AT4G07504 | AT4G07504 | 0        | 0        | 0        | 0        | 0        | 0        | 0.889303 | 0        | 0        | 0        | 0        | 0        | 0        | NA       | 0.160764 | NA       | 0        | NA       |
| AT4G07507 | AT4G07507 | 124.8349 | 92.78079 | 133.9161 | 91.96867 | 88.10815 | 115.6335 | 121.8346 | 103.5734 | 64.43224 | 166.9592 | 192.8984 | 102.5547 | -0.25127 | 0.442828 | -0.26944 | 0.43498  | 0.363546 | 0.458715 |
| AT4G07510 | AT4G07510 | 0        | 0        | 0        | 0.412416 | 0        | 0.996841 | 0.889303 | 1.07889  | 0        | 0.959536 | 0        | 1.035907 | 0.225392 | NA       | 0.353136 | NA       | 0.372487 | NA       |
| AT4G07515 | AT4G07515 | 0        | 0        | 0        | 0        | 0        | 0        | 0        | 0        | 0        | 0        | 0        | 0        | #N/A     | #N/A     | #N/A     | #N/A     | #N/A     | #N/A     |
| AT4G07516 | AT4G07516 | 0        | 0        | 0        | 0.412416 | 0        | 0        | 0        | 0        | 0        | 0        | 0        | 0        | 0.095918 | NA       | 0        | NA       | 0        | NA       |
| AT4G07517 | AT4G07517 | 0        | 0        | 0        | 0        | 1.324935 | 0        | 1.778607 | 0        | 0        | 0        | 0        | 1.035907 | 0.184897 | NA       | 0.251034 | NA       | 0.142475 | NA       |
| AT4G07518 | AT4G07518 | 0        | 0        | 0        | 0.412416 | 0.662467 | 0        | 0        | 1.07889  | 0        | 0        | 0        | 0        | 0.209628 | NA       | 0.176186 | NA       | 0        | NA       |
| AT4G07519 | AT4G07519 | 0        | 0        | 0        | 0        | 0        | 0        | 0.889303 | 0        | 0        | 0        | 0        | 0        | 0        | NA       | 0.160764 | NA       | 0        | NA       |
| AT4G07520 | AT4G07520 | 0        | 0        | 0        | 0        | 0        | 0        | 0        | 0        | 0        | 0        | 0        | 0        | #N/A     | #N/A     | #N/A     | #N/A     | #N/A     | #N/A     |
| AT4G07521 | AT4G07521 | 0        | 0        | 0        | 0        | 0        | 0        | 0        | 0        | 0        | 0        | 0        | 0        | #N/A     | #N/A     | #N/A     | #N/A     | #N/A     | #N/A     |
| AT4G07522 | AT4G07522 | 1.188904 | 0        | 0        | 0        | 0.662467 | 0        | 0.889303 | 0        | 0        | 0        | 0        | 0        | -0.09199 | NA       | -0.04588 | NA       | -0.20606 | NA       |
| AT4G07523 | AT4G07523 | 0        | 0        | 0        | 0        | 0        | 0        | 0        | 0        | 0        | 0        | 0        | 0        | #N/A     | #N/A     | #N/A     | #N/A     | #N/A     | #N/A     |
| AT4G07524 | AT4G07524 | 0        | 0        | 0        | 0        | 0        | 0        | 0        | 0        | 0        | 0        | 0        | 0        | #N/A     | #N/A     | #N/A     | #N/A     | #N/A     | #N/A     |
| AT4G07525 | AT4G07525 | 0        | 0        | 0        | 0        | 0        | 0        | 0        | 0        | 0        | 0        | 0        | 0        | #N/A     | #N/A     | #N/A     | #N/A     | #N/A     | #N/A     |
| AT4G07526 | AT4G07526 | 0        | 1.784246 | 0        | 0.412416 | 0.662467 | 0        | 0        | 1.07889  | 0.976246 | 0        | 2.660668 | 0        | -0.09156 | NA       | 0.076415 | NA       | 0.136309 | NA       |
| AT4G07528 | AT4G07528 | 0        | 0        | 0        | 0        | 0.662467 | 0        | 0.889303 | 0        | 0        | 0        | 0        | 0        | 0.097058 | NA       | 0.130384 | NA       | 0        | NA       |
| AT4G07530 | AT4G07530 | 0        | 0        | 0        | 0        | 0        | 0        | 0        | 0        | 0        | 0        | 0        | 0        | #N/A     | #N/A     | #N/A     | #N/A     | #N/A     | #N/A     |
| AT4G07540 | AT4G07540 | 0        | 0        | 0        | 0        | 0        | 0        | 0        | 0        | 0        | 0        | 1.330334 | 0        | 0        | NA       | 0        | NA       | 0.172362 | NA       |
| AT4G07550 | AT4G07550 | 0        | 0        | 0        | 0        | 0        | 0        | 0        | 0        | 0        | 0        | 0        | 0        | #N/A     | #N/A     | #N/A     | #N/A     | #N/A     | #N/A     |
| AT4G07560 | AT4G07560 | 0        | 0        | 0        | 0        | 0        | 0        | 0        | 0        | 0        | 0        | 0        | 0        | #N/A     | #N/A     | #N/A     | #N/A     | #N/A     | #N/A     |
| AT4G07563 | AT4G07563 | 1.188904 | 0        | 0        | 0        | 0        | 0        | 1.778607 | 0        | 0        | 0        | 0        | 1.035907 | -0.24078 | NA       | 0.09206  | NA       | -0.02924 | NA       |
| AT4G07566 | AT4G07566 | 0        | 0        | 0        | 0.662467 | 0        | 0        | 0        | 0        | 0        | 0        | 1.330334 | 0        | 0.101524 | NA       | 0        | NA       | 0.179327 | NA       |
| AT4G07570 | AT4G07570 | 1.188904 | 0        | 0        | 0        | 0        | 0        | 0        | 0        | 0.976246 | 0        | 0        | 0        | -0.21061 | NA       | -0.03092 | NA       | -0.19245 | NA       |
| AT4G07580 | AT4G07580 | 0        | 0        | 0        | 0        | 0        | 0        | 0.889303 | 0        | 0        | 0        | 1.330334 | 0        | 0        | NA       | 0.141773 | NA       | 0.183636 | NA       |
| AT4G07583 | AT4G07583 | 0        | 0        | 0        | 0        | 0        | 0        | 0.889303 | 0        | 0        | 0        | 0        | 0        | 0        | NA       | 0.160764 | NA       | 0        | NA       |
| AT4G07586 | AT4G07586 | 0        | 0        | 0        | 0        | 0        | 0        | 0        | 1.07889  | 0        | 0        | 0        | 0        | 0        | NA       | 0.16673  | NA       | 0        | NA       |
| AT4G07590 | AT4G07590 | 0        | 0        | 0        | 0        | 0        | 0        | 0        | 0        | 0        | 0        | 0        | 0        | #N/A     | #N/A     | #N/A     | #N/A     | #N/A     | #N/A     |
| AT4G07595 | AT4G07595 | 0        | 0        | 0        | 0        | 0.662467 | 0        | 0        | 0        | 0        | 0        | 0        | 0        | 0.128567 | NA       | 0        | NA       | 0        | NA       |
| AT4G07600 | AT4G07600 | 0        | 0        | 0.412416 | 0.662467 | 0        | 0        | 0        | 0        | 0        | 0.959536 | 0        | 0        | 0.209973 | NA       | 0        | NA       | 0.170506 | NA       |
| AT4G07605 | AT4G07605 | 0        | 0        | 0        | 0        | 0        | 0        | 1.778607 | 0        | 0        | 0        | 1.330334 | 0        | 0        | NA       | 0.264566 | NA       | 0.174671 | NA       |
| AT4G07620 | AT4G07620 | 0        | 0        | 0        | 0        | 0        | 0        | 0.889303 | 0        | 0        | 0.959536 | 0        | 1.035907 | 0        | NA       | 0.161651 | NA       | 0.351496 | NA       |
| AT4G07630 | AT4G07630 | 0        | 0        | 0        | 0        | 0        | 0        | 0        | 1.07889  | 0        | 0        | 1.330334 | 0        | 0        | NA       | 0.160793 | NA       | 0.184979 | NA       |
| AT4G07640 | AT4G07640 | 0        | 0        | 0        | 0        | 0        | 0        | 0        | 0        | 0        | 1.919071 | 1.330334 | 0        | 0        | NA       | 0        | NA       | 0.510836 | NA       |
| AT4G07650 | AT4G07650 | 0        | 0        | 0        | 0        | 0        | 0        | 0        | 0        | 0        | 0        | 0        | 0        | #N/A     | #N/A     | #N/A     | #N/A     | #N/A     | #N/A     |
| AT4G07660 | AT4G07660 | 0        | 0        | 0        | 0        | 1.324935 | 0        | 0        | 2.15778  | 0.976246 | 0.959536 | 0        | 1.035907 | 0.194641 | NA       | 0.473347 | NA       | 0.326073 | NA       |
| AT4G07662 | AT4G07662 | 0        | 1.287654 | 0        | 0        | 0        | 0        | 0        | 0        | 0        | 0        | 0        | 1.035907 | -0.22368 | NA       | -0.20864 | NA       | -0.02973 | NA       |
| AT4G07664 | AT4G07664 | 1.188904 | 0        | 0        | 0        |          |          |          |          |          |          |          |          |          |          |          |          |          |          |





|           |           |          |          |          |          |          |          |          |          |          |          |          |          |          |          |          |          |          |          |          |    |    |
|-----------|-----------|----------|----------|----------|----------|----------|----------|----------|----------|----------|----------|----------|----------|----------|----------|----------|----------|----------|----------|----------|----|----|
| AT4G08760 | AT4G08760 | 0        | 1.784246 | 0        | 0        | 0.662467 | 0.996841 | 0.889303 | 0        | 0        | 0        | 0        | 1.035907 | 0.005805 | NA       | -0.1025  | NA       | -0.07553 | NA       |          |    |    |
| AT4G08765 | AT4G08765 | 0        | 0        | 0        | 0        | 0.662467 | 0.996841 | 0.889303 | 1.07889  | 0        | 0        | 0.959536 | 0        | 0        | 0.267476 | NA       | 0.342099 | NA       | 0.173503 | NA       |    |    |
| AT4G08770 | PER37     | 2.377808 | 1.784246 | 0        | 26.80701 | 22.52389 | 35.88627 | 44.46517 | 36.68226 | 35.14486 | 0.919071 | 5.321336 | 0        | 0        | 2.925689 | 1.44E-09 | 3.354338 | 2.88E-12 | 0.141336 | 0.921904 |    |    |
| AT4G08780 | PER38     | 1.188904 | 0        | 2.575309 | 11.13522 | 15.89921 | 18.93997 | 12.45025 | 14.02557 | 9.76246  | 0.959536 | 0        | 0        | 0        | 2.279452 | 3.13E-05 | 1.973787 | 0.000551 | -0.50341 | NA       |    |    |
| AT4G08790 | NLP2      | 83.22328 | 73.15409 | 68.24568 | 138.5716 | 120.569  | 109.6525 | 107.6057 | 66.89118 | 99.57709 | 81.56053 | 81.15037 | 88.05205 | 0.697628 | 0.002237 | 0.278345 | 0.316616 | 0.148788 | 0.768975 | 0        | NA |    |
| AT4G08800 | AT4G08800 | 0        | 0        | 0        | 0.412416 | 0        | 0        | 0.889303 | 0        | 0        | 0        | 0        | 0        | 0.066991 | NA       | 0.136991 | NA       | 0        | NA       | 0        | NA |    |
| AT4G08810 | SUB1      | 543.3291 | 481.7464 | 451.9667 | 342.7173 | 356.4074 | 363.8469 | 329.9316 | 333.377  | 385.6172 | 403.9645 | 457.6349 | 447.5116 | -0.47303 | 0.000371 | -0.48957 | 0.000354 | -0.17577 | 0.463036 | 0        | NA |    |
| AT4G08820 | AT4G08820 | 0        | 0        | 0        | 0        | 0        | 0        | 0        | 1.07889  | 0        | 0        | 0        | 0        | 0        | 0.16673  | NA       | 0        | NA       | 0        | NA       | 0  | NA |
| AT4G08830 | AT4G08830 | 0        | 0        | 0        | 0.412416 | 0        | 0        | 0        | 0        | 0        | 0        | 0        | 0        | 0        | 1.035907 | 0.065109 | NA       | 0        | NA       | 0.150531 | NA |    |
| AT4G08840 | APUM11    | 0        | 0        | 0        | 0        | 0.662467 | 0        | 0.889303 | 0        | 0        | 0        | 0        | 0        | 0        | 0.097058 | NA       | 0.130384 | NA       | 0        | NA       | 0  | NA |
| AT4G08850 | AT4G08850 | 1026.024 | 933.1607 | 715.9358 | 1655.436 | 1585.284 | 1778.364 | 1327.73  | 1409.03  | 1113.897 | 542.1376 | 618.6053 | 532.456  | 0.892883 | 3.38E-09 | 0.516805 | 0.001363 | -0.64941 | 0.000651 | 0        | NA |    |
| AT4G08860 | AT4G08860 | 0        | 0        | 0        | 0.824831 | 3.974804 | 1.993682 | 0.889303 | 1.07889  | 0.976246 | 0        | 0        | 0        | 1.067944 | 0.065575 | 0.496114 | 0.445019 | 0        | NA       | 0        | NA |    |
| AT4G08867 | AT4G08867 | 0        | 0        | 1.287654 | 0        | 0        | 0        | 0.889303 | 0        | 0        | 0        | 0        | 0        | -0.21946 | NA       | -0.0473  | NA       | -0.20113 | NA       | 0        | NA |    |
| AT4G08868 | AT4G08868 | 0        | 0        | 0        | 0.412416 | 0        | 0        | 0        | 0        | 0        | 0        | 0        | 0        | 0.095918 | NA       | 0        | NA       | 0        | NA       | 0        | NA |    |
| AT4G08869 | AT4G08869 | 0        | 0        | 0        | 0        | 0        | 0        | 0        | 0        | 0        | 0        | 0        | 0        | #N/A     | #N/A     | #N/A     | #N/A     | #N/A     | #N/A     | 0        | NA |    |
| AT4G08870 | ARGAH2    | 823.9104 | 843.9484 | 880.7556 | 1195.593 | 1072.535 | 1159.326 | 907.9789 | 1050.839 | 1030.916 | 1380.772 | 1607.043 | 960.2854 | 0.41867  | 0.020687 | 0.225017 | 0.273571 | 0.61719  | 0.004448 | 0        | NA |    |
| AT4G08871 | AT4G08871 | 0        | 0        | 0        | 0        | 0        | 0        | 0        | 0        | 0        | 0        | 0        | 0        | #N/A     | #N/A     | #N/A     | #N/A     | #N/A     | #N/A     | 0        | NA |    |
| AT4G08872 | AT4G08872 | 0        | 0        | 0        | 0        | 0        | 0        | 0        | 0        | 0        | 0        | 0        | 0        | #N/A     | #N/A     | #N/A     | #N/A     | #N/A     | #N/A     | 0        | NA |    |
| AT4G08873 | AT4G08873 | 0        | 0        | 0        | 0        | 0        | 0        | 0        | 0        | 0        | 0        | 0        | 0        | #N/A     | #N/A     | #N/A     | #N/A     | #N/A     | #N/A     | 0        | NA |    |
| AT4G08874 | AT4G08874 | 3.566712 | 3.568492 | 2.575309 | 2.062078 | 0.662467 | 0        | 1.778607 | 1.07889  | 3.904984 | 0.959536 | 1.330334 | 2.071813 | -0.7821  | 0.257741 | -0.25793 | 0.759144 | -0.55968 | NA       | 0        | NA |    |
| AT4G08875 | AT4G08875 | 0        | 0        | 0        | 0        | 0        | 0.996841 | 0        | 0        | 0        | 0        | 0        | 0        | 0.15625  | NA       | 0        | NA       | 0        | NA       | 0        | NA |    |
| AT4G08876 | AT4G08876 | 0        | 0        | 0        | 0.662467 | 0        | 0        | 1.778607 | 0        | 0        | 0        | 0        | 1.035907 | 0.086325 | NA       | 0.271445 | NA       | 0.154173 | NA       | 0        | NA |    |
| AT4G08878 | AT4G08878 | 0        | 0        | 0        | 0        | 0        | 0        | 0        | 0        | 0        | 0        | 0        | 0        | #N/A     | #N/A     | #N/A     | #N/A     | #N/A     | #N/A     | 0        | NA |    |
| AT4G08880 | AT4G08880 | 0        | 0        | 0        | 0        | 0        | 3.557214 | 0        | 0        | 0        | 0        | 0        | 0        | 0        | NA       | 0.434799 | NA       | 0        | NA       | 0        | NA |    |
| AT4G08890 | AT4G08890 | 0        | 0        | 0        | 0        | 1.778607 | 0        | 0        | 0        | 0        | 0        | 0        | 1.035907 | 0        | NA       | 0.26262  | NA       | 0.150298 | NA       | 0        | NA |    |
| AT4G08895 | AT4G08895 | 0        | 0        | 0        | 0        | 0        | 0        | 0        | 0        | 0        | 0        | 0        | 0        | #N/A     | #N/A     | #N/A     | #N/A     | #N/A     | #N/A     | 0        | NA |    |
| AT4G08900 | ARGAH1    | 149.8019 | 164.1506 | 139.0667 | 167.0283 | 123.8814 | 128.5925 | 115.6095 | 132.7035 | 162.0568 | 135.2945 | 115.7391 | 151.2424 | -0.09201 | 0.726319 | -0.13517 | 0.617916 | -0.15654 | 0.715269 | 0        | NA |    |
| AT4G08910 | AT4G08910 | 10.70014 | 26.76369 | 20.60247 | 16.90094 | 18.54908 | 9.968408 | 14.22886 | 6.47334  | 11.71495 | 32.62421 | 26.60668 | 29.00538 | -0.24315 | 0.623746 | -0.66664 | 0.16915  | 0.588502 | 0.386465 | 0        | NA |    |
| AT4G08920 | CRY1      | 2805.813 | 2658.527 | 2427.228 | 1310.244 | 1226.889 | 1561.053 | 1225.46  | 1485.631 | 1189.068 | 2056.285 | 1795.951 | 2067.669 | -0.93434 | 3.68E-12 | -1.00364 | 8.89E-14 | -0.40862 | 0.030349 | 0        | NA |    |
| AT4G08930 | APRL6     | 279.3924 | 365.7704 | 343.8037 | 415.7149 | 473.6641 | 481.4741 | 276.5734 | 290.2214 | 309.47   | 331.0398 | 316.6195 | 254.833  | 0.466604 | 0.003698 | -0.16605 | 0.401697 | -0.12445 | 0.707732 | 0        | NA |    |
| AT4G08940 | AT4G08940 | 40.42273 | 57.09587 | 48.93086 | 38.76706 | 52.99738 | 45.85468 | 40.90796 | 38.84004 | 52.71728 | 51.81492 | 59.86503 | 34.18492 | -0.07891 | 0.835402 | -0.12008 | 0.765498 | -0.00026 | 0.999512 | 0        | NA |    |
| AT4G08945 | AT4G08945 | 0        | 0        | 0        | 0        | 0        | 0        | 0        | 0        | 0        | 0        | 0        | 0        | #N/A     | #N/A     | #N/A     | #N/A     | #N/A     | #N/A     | 0        | NA |    |
| AT4G08949 | AT4G08949 | 0        | 0        | 0        | 0        | 0        | 0        | 0        | 0        | 0        | 0        | 0        | 0        | #N/A     | #N/A     | #N/A     | #N/A     | #N/A     | #N/A     | 0        | NA |    |
| AT4G08950 | EXO       | 225.8917 | 187.3458 | 191.8605 | 649.5545 | 628.019  | 784.5137 | 570.0435 | 911.662  | 894.2413 | 235.0862 | 275.3791 | 170.9246 | 1.704011 | 3.45E-16 | 1.902669 | 5.99E-20 | 0.156324 | 0.742031 | 0        | NA |    |
| AT4G08953 | AT4G08953 | 0        | 0        | 0        | 0        | 0.996841 | 0        | 0        | 0        | 0        | 0        | 0        | 0        | 0.15625  | NA       | 0        | NA       | 0        | NA       | 0        | NA |    |
| AT4G08956 | AT4G08956 | 0        | 0        | 0.412416 | 0        | 0        | 0        | 0        | 0        | 0        | 0        | 0        | 0        | 0.095918 | NA       | 0        | NA       | 0        | NA       | 0        | NA |    |
| AT4G08960 | AT4G08960 | 216.3805 | 162.3664 | 178.984  | 171.9773 | 198.7402 | 160.4914 | 148.5137 | 163.9913 | 187.4392 | 170.7973 | 242.1208 | 162.6373 | -0.07305 | 0.781795 | -0.16142 | 0.531217 | 0.028852 | 0.959432 | 0        | NA |    |
| AT4G08967 | AT4G08967 | 0        | 0        | 0        | 0        | 0        | 0        | 0        | 0        | 0        | 0        | 0        | 0        | #N/A     | #N/A     | #N/A     | #N/A     | #N/A     | #N/A     | 0        | NA |    |
| AT4G08970 | AT4G08970 | 1.188904 | 0        | 0        | 0        | 0        | 0        | 0        | 0        | 0        | 0        | 0        | 0        | -0.2184  | NA       | -0.20558 | NA       | -0.19918 | NA       | 0        | NA |    |
| AT4G08980 | FBW2      | 549.2736 | 594.1539 | 570.4309 | 880.5073 | 877.7691 | 813.4221 | 711.4428 | 705.594  | 825.9041 | 515.2706 | 508.1876 | 595.6463 | 0.583101 | 1.33E-06 | 0.386045 | 0.002802 | -0.07815 | 0.774901 | 0        | NA |    |
| AT4G08990 | MET2      | 8.322328 | 5.352738 | 7.725926 | 10.7228  | 16.56168 | 5.981045 | 11.56095 | 9.710009 | 10.73871 | 4.797678 | 10.64267 | 2.071813 | 0.508946 | 0.386595 | 0.43325  | 0.501746 | -0.27785 | NA       | 0        | NA |    |
| AT4G08991 | AT4G08991 | 13.07794 | 8.92123  | 16.73951 | 24.33252 | 21.86142 | 10.96525 | 20.45398 | 10.7889  | 12.6912  | 9.595356 | 11.97301 | 18.64632 | 0.497144 | 0.316719 | 0.137597 | 0.829184 | 0.020447 | NA       | 0        | NA |    |
| AT4G08995 | AT4G08995 | 0        | 0        | 0        | 0        | 0        | 0        | 0        | 0        | 0        | 0        | 0        | 0        | #N/A     | #N/A     | #N/A     | #N/A     | #N/A     | #N/A     | 0        | NA |    |
| AT4G09000 | GRF1      | 4016.118 | 4030.612 | 3974.989 | 3583.891 | 4382.221 | 4111.968 | 4108.582 | 3956.289 | 4680.123 | 3548.363 | 3436.253 | 3444.389 | 0.006183 | 0.969003 | 0.083688 | 0.557472 | -0.20317 | 0.259686 | 0        | NA |    |
| AT4G09010 | TL29      | 3331.309 | 3941.399 | 3883.565 | 2453.873 | 2249.076 | 2298.715 | 2578.98  | 2560.206 | 2401.565 | 4300.639 | 4037.564 | 4181.955 | -0.66594 | 1.15E-11 | -0.56023 | 2.03E-08 | 0.166298 | 0.324511 | 0        | NA |    |
| AT4G09012 | AT4G09012 | 9.511232 | 7.136984 | 10.30123 | 9.897974 | 11.26194 | 8.971567 | 10.67164 | 8.63112  | 10.73871 | 4.797678 | 6.65167  | 8.287252 | 0.129254 | 0.835693 | 0.11832  | 0.863336 | -0.37567 | NA       | 0        | NA |    |
| AT4G09020 | ISA3      | 781.1099 | 815.4004 | 811.2222 | 963.8152 | 891.0185 | 985.8755 | 1279.708 | 1460.817 | 926.4574 | 1016.148 | 839.4407 | 872.2333 | 0.23399  | 0.207831 | 0.595469 | 0.000431 | 0.177833 | 0.570796 | 0        | NA |    |
| AT4G09030 | AGP10     | 40.42273 | 24.97944 | 29.61605 | 100.217  | 101.3575 | 104.6683 | 80.91675 | 148.3894 | 45.09817 | 55.87403 | 27.96948 | 1.542591 | 4.68E-07 | 1.559569 | 4.9E-07  | 0.36107  | 0.560065 | 0        | NA       |    |    |
| AT4G09040 | AT4G09040 | 796.5656 | 777.9313 | 791.9074 | 513.4574 | 591.5833 | 533.3098 | 722.1144 | 700.1996 | 717.5408 | 803.1313 | 987.1078 | 860.8383 | -0.52677 | 8.5E-06  | -0.14402 | 0.3169   | 0.195268 | 0.454232 | 0        | NA |    |
| AT4G09060 | AT4G09060 | 32.10041 | 17.84246 | 25.75309 | 52.78919 | 56.30972 | 29.90522 | 32.01493 | 46.39227 | 41.00233 | 28.78607 | 38.57969 | 48.68761 | 0.795613 | 0.024199 | 0.561426 | 0.155666 | 0.525415 | 0.375703 | 0        | NA |    |
| AT4G09070 | MED20B    | 0        | 0        | 0        | 0        | 0        | 0        | 1.07889  | 0        | 0        | 0        | 0        | 0        | 0.16673  | NA       | 0        | NA       | 0        | NA       | 0        | NA |    |
| AT4G09080 | TOC75-4   | 4.755616 | 5.352738 | 2.575309 | 11.13522 | 11.26194 | 11.96209 | 7.114428 | 8.63112  | 4.88123  | 11.51443 | 3.991002 | 8.287252 | 1.09351  | 0.044297 | 0.477735 | 0.475356 | 0.677157 | NA       | 0        | NA |    |
| AT4G09090 | AT4G09090 | 0        | 0        | 0        | 0        | 0        | 0        | 1.07889  | 0        | 0        | 0        | 0        | 0        | #N/A     | #N/A     | #N/A     | #N/A     | #N/A     | #N/A     | 0        | NA |    |
| AT4G09100 | ATL39     | 0        | 0        | 0        | 0        | 0        | 1.993682 | 0        | 0        | 0        | 0        | 0        | 0        | 0.249001 | NA       | 0        | NA       | 0        | NA       | 0        | NA |    |
| AT4G09110 | ATL35     | 0        | 0        | 0        | 0.412416 | 0.662467 | 0.996841 | 0        | 0        | 0        | 0        | 0        | 0        | 0.410231 | NA       | 0        | NA       | 0        | NA       | 0        | NA |    |
| AT4G09120 | ATL36     | 0        | 0        | 0        | 0.412416 | 0.662467 | 1.993682 | 0.889303 | 0        | 0        | 0        | 0        | 0        | 0.543046 | NA       | 0.16272  | NA       | 0        | NA       | 0        | NA |    |
| AT4G09130 | ATL37     | 1.188904 | 1.784246 | 0        | 0        | 1.324935 | 0        | 0.889303 | 2.15778  | 0        | 0        | 0        | 0        | -0.23194 | NA       | 0.045425 | NA       | -0.4596  | NA       | 0        | NA |    |
| AT4G09140 | MLH1      | 139.1018 | 135.6027 | 168.6827 | 178.5759 | 182.841  | 187.4061 | 163.6318 | 159.6757 | 135.6982 | 137.2136 | 137.0244 | 162.6373 | 0.294924 | 0.11     |          |          |          |          |          |    |    |





|           |           |          |          |          |          |          |          |          |          |          |          |          |           |          |          |          |          |           |          |
|-----------|-----------|----------|----------|----------|----------|----------|----------|----------|----------|----------|----------|----------|-----------|----------|----------|----------|----------|-----------|----------|
| AT4G10310 | HKT1      | 19.02246 | 3.568492 | 9.01358  | 2.474493 | 1.987402 | 2.990522 | 0        | 0        | 0        | 8.635821 | 10.64267 | 9.323159  | -1.55271 | 0.007044 | -2.54981 | 1.36E-05 | -0.14933  | NA       |
| AT4G10320 | AT4G10320 | 1344.65  | 1102.664 | 1023.685 | 736.5742 | 686.9786 | 951.9829 | 883.0784 | 1010.92  | 645.2986 | 936.5068 | 907.2878 | 918.8491  | -0.53693 | 0.005278 | -0.44112 | 0.02958  | -0.32191  | 0.294266 |
| AT4G10330 | AT4G10330 | 97.49012 | 99.91778 | 101.7247 | 133.2102 | 160.9795 | 93.70303 | 89.81965 | 75.5223  | 150.3419 | 121.861  | 151.6581 | 106.6984  | 0.363124 | 0.234287 | 0.074347 | 0.028954 | 0.322971  | 0.524256 |
| AT4G10340 | LHC85     | 64683.51 | 81070.79 | 75188.71 | 32579.59 | 32814.65 | 31363.6  | 28671.14 | 27997.19 | 34731.9  | 75667.06 | 63558.04 | 70344.27  | -1.17723 | 1.97E-21 | -1.25845 | 1.97E-24 | -0.0753   | 0.792429 |
| AT4G10345 | MIR832A   | 0        | 0        | 0        | 0        | 0        | 0        | 0        | 0        | 0        | 0        | 0        | 0         | #N/A     | #N/A     | #N/A     | #N/A     | #N/A      | #N/A     |
| AT4G10350 | BRN2      | 0        | 0        | 0        | 0        | 0        | 0        | 0        | 0        | 0        | 0        | 0        | 0         | 0        | NA       | 0        | NA       | 0.172362  | NA       |
| AT4G10360 | AT4G10360 | 212.8138 | 205.1883 | 231.7778 | 223.5292 | 266.9743 | 216.3144 | 218.7687 | 200.6735 | 282.1351 | 243.722  | 179.5951 | 264.1562  | 0.117356 | 0.624581 | 0.106447 | 0.681738 | 0.082968  | 0.857738 |
| AT4G10370 | AT4G10370 | 1.188904 | 0        | 0        | 0        | 1.987402 | 0        | 0        | 0        | 0        | 0        | 0        | 0         | 0.117884 | NA       | -0.19902 | NA       | -0.02827  | NA       |
| AT4G10380 | NIP5-1    | 71.33424 | 53.52738 | 47.64321 | 135.2723 | 126.5312 | 123.6083 | 165.4104 | 128.3879 | 173.7718 | 87.31774 | 79.82004 | 78.7289   | 1.109751 | 2.25E-07 | 1.379852 | 9.52E-11 | 0.477041  | 0.184358 |
| AT4G10390 | AT4G10390 | 40.42273 | 28.54794 | 29.61605 | 24.74493 | 25.83622 | 17.94313 | 30.23632 | 35.60337 | 19.52492 | 45.09817 | 34.58868 | 34.18492  | -0.47674 | 0.187052 | -0.20904 | 0.631313 | 0.187835  | 0.791971 |
| AT4G10400 | AT4G10400 | 84.41128 | 83.85956 | 86.27284 | 64.33683 | 66.90919 | 72.76938 | 76.4801  | 75.5223  | 63.45599 | 97.87263 | 53.21336 | 106.6984  | -0.31364 | 0.256824 | -0.23046 | 0.458632 | 0.033846  | 0.960974 |
| AT4G10410 | AT4G10410 | 0        | 0        | 0        | 0.824831 | 0        | 0        | 0        | 0        | 0        | 0        | 1.330334 | 0         | 0.140102 | NA       | 0        | NA       | 0.173173  | NA       |
| AT4G10414 | AT4G10414 | 0        | 1.784246 | 1.287654 | 0.824831 | 1.987402 | 0.996841 | 2.66791  | 0        | 2.928738 | 0        | 0        | 0.2071813 | 0.120743 | 0.879097 | 0.364708 | 0.629743 | -0.12024  | NA       |
| AT4G10420 | AT4G10420 | 39.23383 | 23.1952  | 19.31482 | 10.31039 | 11.26194 | 18.93997 | 15.11816 | 12.94668 | 14.64369 | 23.98839 | 18.62468 | 34.18492  | -0.963   | 0.017787 | -0.835   | 0.057881 | -0.08135  | 0.935568 |
| AT4G10430 | AT4G10430 | 262.7478 | 246.226  | 226.6272 | 239.201  | 282.2111 | 250.207  | 241.0012 | 188.8057 | 265.5389 | 273.4677 | 271.3881 | 272.4434  | 0.065779 | 0.755925 | -0.07763 | 0.730424 | 0.148718  | 0.644483 |
| AT4G10440 | AT4G10440 | 0        | 0        | 0        | 0.412416 | 0.662467 | 0        | 0.889303 | 1.07889  | 0.976246 | 0        | 0        | 1.035907  | 0.201344 | NA       | 0.540537 | NA       | 0.190946  | NA       |
| AT4G10450 | RPL9D     | 500.5286 | 562.0375 | 602.6222 | 626.4593 | 696.2531 | 571.1898 | 580.7152 | 445.5815 | 712.6596 | 635.2126 | 428.3675 | 584.2513  | 0.182277 | 0.433837 | 0.062173 | 0.823748 | -0.01154  | 0.984708 |
| AT4G10457 | SCR11     | 0        | 0        | 0        | 0        | 0        | 0        | 0        | 0        | 0        | 0        | 0        | 0         | #N/A     | #N/A     | #N/A     | #N/A     | #N/A      | #N/A     |
| AT4G10460 | AT4G10460 | 1.188904 | 0        | 0        | 0.412416 | 0        | 0        | 1.778607 | 1.07889  | 0        | 0.959536 | 0        | 1.035907  | -0.21419 | NA       | 0.266679 | NA       | 0.131168  | NA       |
| AT4G10465 | AT4G10465 | 0        | 0        | 0        | 0        | 0        | 0        | 0.889303 | 0        | 0        | 0.959536 | 0        | 0         | 0        | NA       | 0.13694  | NA       | 0.147196  | NA       |
| AT4G10470 | AT4G10470 | 199.7359 | 157.0137 | 215.0383 | 152.5938 | 172.904  | 141.5514 | 233.8868 | 217.9358 | 158.1519 | 192.8667 | 211.5231 | 229.9712  | -0.29023 | 0.178295 | 0.083053 | 0.757853 | 0.13682   | 0.739371 |
| AT4G10480 | AT4G10480 | 2052.048 | 2228.523 | 2404.051 | 2330.56  | 2492.202 | 2138.223 | 1856.866 | 1876.19  | 2671.985 | 2591.706 | 2945.359 | 2426.093  | 0.057842 | 0.786595 | -0.06043 | 0.790367 | 0.147717  | 0.365357 |
| AT4G10490 | AT4G10490 | 0        | 0        | 0        | 0        | 0.662467 | 0        | 0.889303 | 1.07889  | 0        | 0        | 0        | 1.035907  | 0.094508 | NA       | 0.335027 | NA       | 0.178483  | NA       |
| AT4G10500 | AT4G10500 | 29.7226  | 71.36984 | 36.05432 | 583.9805 | 487.5759 | 440.6036 | 104.9378 | 110.0468 | 98.60085 | 3.838143 | 10.64267 | 8.287252  | 3.395523 | 2.03E-46 | 1.184405 | 7.17E-06 | -2.14143  | 2.18E-08 |
| AT4G10507 | AT4G10507 | 0        | 0        | 0        | 0.412416 | 0.662467 | 0        | 0        | 0        | 0        | 0.959536 | 0        | 0         | 0.209973 | NA       | 0        | NA       | 0.170506  | NA       |
| AT4G10510 | AT4G10510 | 0        | 1.784246 | 0        | 0        | 0        | 0.996841 | 0.889303 | 0        | 0        | 0        | 0        | 1.035907  | -0.11713 | NA       | -0.09472 | NA       | -0.07078  | NA       |
| AT4G10520 | AT4G10520 | 0        | 0        | 0        | 0        | 0        | 0        | 0        | 0        | 0        | 0        | 0        | 0         | #N/A     | #N/A     | #N/A     | #N/A     | #N/A      | #N/A     |
| AT4G10530 | AT4G10530 | 0        | 0        | 0        | 0        | 0        | 0        | 0        | 1.07889  | 0.976246 | 0        | 1.330334 | 0         | 0        | NA       | 0.34973  | NA       | 0.20646   | NA       |
| AT4G10540 | AT4G10540 | 0        | 0        | 0        | 0        | 0        | 0        | 0.889303 | 0        | 0        | 0.959536 | 0        | 0         | 0        | NA       | 0.13694  | NA       | 0.147196  | NA       |
| AT4G10550 | AT4G10550 | 79.65656 | 57.09587 | 74.68395 | 55.26369 | 51.00998 | 52.83256 | 56.02612 | 53.9445  | 30.26363 | 57.57214 | 50.55269 | 48.68761  | -0.40137 | 0.155998 | -0.57597 | 0.049195 | -0.42004  | 0.347323 |
| AT4G10560 | MEE53     | 9.511232 | 5.352738 | 6.438272 | 3.71174  | 1.987402 | 0.996841 | 3.57214  | 1.07889  | 2.928738 | 3.838143 | 0        | 6.215349  | -1.02134 | 0.109701 | -0.94647 | 0.164686 | -0.68626  | NA       |
| AT4G10570 | UBP10     | 243.7253 | 242.6575 | 217.6136 | 191.7732 | 206.6898 | 211.3302 | 232.1082 | 216.8569 | 184.5105 | 199.5834 | 226.1568 | 194.7504  | -0.20721 | 0.23146  | -0.14717 | 0.451694 | -0.18188  | 0.537149 |
| AT4G10580 | AT4G10580 | 3.566712 | 0        | 0        | 0.824831 | 0.662467 | 0.996841 | 0        | 0        | 0.959536 | 0        | 0        | 0         | -0.15149 | NA       | -0.62262 | NA       | -0.40924  | NA       |
| AT4G10590 | UBP9      | 256.8033 | 230.1677 | 230.4901 | 197.5471 | 217.9517 | 230.2702 | 268.5697 | 282.6692 | 197.2017 | 225.4909 | 214.1838 | 239.2944  | -0.15752 | 0.433268 | 0.056564 | 0.815165 | -0.07883  | 0.845772 |
| AT4G10595 | LCR2      | 0        | 0        | 0        | 0        | 0        | 0        | 0        | 0        | 0        | 0        | 0        | 0         | #N/A     | #N/A     | #N/A     | #N/A     | #N/A      | #N/A     |
| AT4G10596 | AT4G10596 | 0        | 0        | 0        | 0        | 0        | 0        | 0        | 0        | 0        | 0        | 0        | 0         | #N/A     | #N/A     | #N/A     | #N/A     | #N/A      | #N/A     |
| AT4G10600 | AT4G10600 | 24.96698 | 21.41095 | 23.17778 | 12.78488 | 13.91181 | 16.94629 | 11.56095 | 19.42002 | 20.50117 | 15.35257 | 19.95501 | 23.82585  | -0.63622 | 0.115531 | -0.40428 | 0.38326  | -0.22014  | 0.789813 |
| AT4G10603 | AT4G10603 | 0        | 0        | 0        | 0        | 0        | 0        | 0        | 0        | 0        | 0        | 0        | 0         | #N/A     | #N/A     | #N/A     | #N/A     | #N/A      | #N/A     |
| AT4G10610 | CID12     | 580.1851 | 722.6196 | 637.3889 | 630.9958 | 637.956  | 677.8517 | 694.546  | 746.5918 | 741.947  | 549.8139 | 448.3225 | 565.605   | 0.007737 | 0.967218 | 0.172211 | 0.274587 | -0.2993   | 0.142544 |
| AT4G10613 | AT4G10613 | 0        | 0        | 0        | 0        | 0        | 0        | 0        | 0        | 0        | 0        | 0        | 0         | #N/A     | #N/A     | #N/A     | #N/A     | #N/A      | #N/A     |
| AT4G10620 | AT4G10620 | 111.757  | 96.34929 | 83.69753 | 105.9908 | 90.75802 | 75.7599  | 84.48383 | 96.0212  | 76.14719 | 61.41028 | 70.5077  | 95.3034   | -0.8102  | 0.79084  | -0.18234 | 0.546367 | -0.34808  | 0.404721 |
| AT4G10630 | AT4G10630 | 11.88904 | 12.48972 | 16.73951 | 11.13522 | 8.612075 | 4.984204 | 14.22886 | 19.42002 | 15.61994 | 15.35257 | 11.97301 | 12.43088  | -0.56761 | 0.244419 | 0.221642 | 0.698701 | -0.03596  | NA       |
| AT4G10640 | IQD16     | 1.188904 | 0        | 0        | 3.862963 | 2.062078 | 1.324935 | 0        | 3.57214  | 2.15778  | 2.928738 | 3.838143 | 1.330334  | -0.26205 | 0.741476 | 0.350657 | 0.663788 | -0.423769 | NA       |
| AT4G10650 | DGP2      | 11.88904 | 14.27397 | 15.45185 | 25.56977 | 27.16116 | 22.92734 | 26.6791  | 25.89336 | 27.33489 | 15.35257 | 7.982004 | 14.50269  | 0.786502 | 0.04578  | 0.847344 | 0.039662 | -0.09054  | 0.931948 |
| AT4G10655 | AT4G10655 | 0        | 0        | 0        | 0        | 0        | 0        | 0        | 0        | 0        | 0        | 0        | 0         | 0        | NA       | 0        | NA       | 0.172362  | NA       |
| AT4G10660 | AT4G10660 | 0        | 0        | 0        | 0.412416 | 0        | 0        | 0        | 1.07889  | 0        | 0        | 0        | 0         | 0.064603 | NA       | 0.150774 | NA       | 0         | NA       |
| AT4G10670 | GT2C      | 0        | 1.287654 | 0        | 3.312336 | 1.993682 | 3.557214 | 2.15778  | 0        | 2.878607 | 3.991002 | 2.071813 | 0         | 0.432666 | 0.546923 | 0.159108 | 0.478855 | 0.805813  | NA       |
| AT4G10680 | AT4G10680 | 0        | 1.784246 | 0        | 0        | 0        | 0        | 0        | 0        | 0.976246 | 0        | 0        | 0         | -0.266   | NA       | -0.07274 | NA       | -0.24323  | NA       |
| AT4G10690 | AT4G10690 | 101.0568 | 87.42806 | 84.98519 | 68.04857 | 64.92179 | 55.82308 | 86.26244 | 77.68008 | 54.66978 | 92.11542 | 73.16837 | 97.37521  | -0.50653 | 0.037233 | -0.31289 | 0.257341 | -0.05181  | 0.932254 |
| AT4G10695 | AT4G10695 | 0        | 5.352738 | 7.725926 | 0.824831 | 0        | 1.993682 | 0.889303 | 0        | 0        | 2.878607 | 0        | 2.071813  | -0.97773 | 0.134259 | -1.21535 | 0.059353 | -0.61994  | NA       |
| AT4G10700 | AT4G10700 | 0        | 0        | 0        | 0        | 0        | 0        | 1.778607 | 0        | 0        | 0        | 0        | 0         | 0        | NA       | 0.248756 | NA       | 0         | NA       |
| AT4G10710 | SP116     | 706.2089 | 545.9793 | 491.884  | 391.3824 | 401.4552 | 452.5657 | 462.4378 | 579.3639 | 453.5944 | 469.2129 | 504.1966 | 528.3123  | -0.48208 | 0.004715 | -0.22098 | 0.260637 | -0.21446  | 0.474669 |
| AT4G10720 | AT4G10720 | 1.188904 | 0        | 0        | 3.312336 | 4.984204 | 1.778607 | 1.07889  | 0        | 0        | 0        | 0        | 0         | 1.255614 | 0.044594 | 0.216767 | 0.788511 | -0.09049  | NA       |
| AT4G10730 | AT4G10730 | 544.518  | 485.3149 | 458.4049 | 553.8741 | 445.8405 | 594.1171 | 579.8259 | 523.2616 | 385.6172 | 446.1841 | 560.0706 | 494.1274  | 0.094539 | 0.683083 | -6.5E-05 | 0.999918 | 0.008566  | 0.987749 |
| AT4G10740 | AT4G10740 | 0        | 0        | 0        | 0        | 0.996841 | 0        | 0        | 0        | 0        | 0        | 0        | 0         | 0.15625  | NA       | 0        | NA       | 0         | NA       |
| AT4G10750 | AT4G10750 | 101.0568 | 105.2705 | 108.163  | 84.54519 | 80.15854 | 82.73778 | 71.14428 | 75.5223  | 139.6032 | 111.3061 | 83.81104 | 94.26749  | -0.32915 | 0.248482 | -0.1288  | 0.70782  | -0.10811  | 0.858201 |
| AT4G10760 | MTA       | 800.7134 | 151.6609 | 181.5593 | 184.7622 | 207.3523 | 146.5356 | 191.2002 | 160.7546 | 192.3205 | 175.595  | 163.6311 | 154.3501  | 0.068368 | 0.77343  | 0.075798 | 0.764899 | -0.06328  | 0.887392 |
| AT4G10767 | SCR121    | 0        | 0        | 0        | 0        | 0        | 0        | 1.778607 | 0        | 0        | 0        | 0        | 0         | #N/A     | #N/A     |          |          |           |          |



|           |           |          |          |          |          |          |          |          |          |          |          |          |          |          |          |          |          |          |          |
|-----------|-----------|----------|----------|----------|----------|----------|----------|----------|----------|----------|----------|----------|----------|----------|----------|----------|----------|----------|----------|
| AT4G12040 | SAP7      | 373.3158 | 406.8081 | 413.337  | 578.2066 | 631.3313 | 611.0634 | 605.6157 | 579.3639 | 720.4695 | 484.5655 | 468.2776 | 341.8492 | 0.599008 | 0.000169 | 0.664558 | 3.35E-05 | 0.115202 | 0.734783 |
| AT4G12050 | AHL26     | 0        | 1.784246 | 0        | 0.412416 | 0        | 0        | 0.889303 | 1.07889  | 0.976246 | 1.919071 | 1.330334 | 3.10772  | -0.32545 | 0.636229 | 0.23899  | 0.751213 | 0.731989 | NA       |
| AT4G12060 | AT4G12060 | 545.7069 | 558.469  | 536.9519 | 486.238  | 505.4625 | 465.5246 | 586.051  | 529.735  | 751.7094 | 612.1837 | 706.4073 | 654.6929 | -0.16744 | 0.324728 | 0.184876 | 0.293759 | 0.261128 | 0.278295 |
| AT4G12065 | AT4G12065 | 1.188904 | 0        | 0        | 0.824831 | 0        | 0        | 0.889303 | 2.15778  | 0        | 0        | 0        | 0        | -0.06528 | NA       | 0.265777 | NA       | -0.22934 | NA       |
| AT4G12070 | AT4G12070 | 179.5245 | 181.9931 | 166.1074 | 218.5803 | 215.3019 | 210.3334 | 244.5885 | 260.0125 | 179.6293 | 161.202  | 150.3277 | 134.6678 | 0.285391 | 0.172111 | 0.367958 | 0.059847 | -0.234   | 0.480733 |
| AT4G12080 | AHL1      | 22.58917 | 23.1952  | 23.17778 | 26.3946  | 31.79843 | 28.90838 | 31.79843 | 30.20892 | 30.26363 | 28.78607 | 17.29434 | 23.82585 | 0.304495 | 0.450684 | 0.136758 | 0.746053 | 0.036307 | 0.917175 |
| AT4G12090 | AT4G12090 | 0        | 1.784246 | 1.287654 | 3.299325 | 4.637271 | 1.993682 | 1.778607 | 1.07889  | 0.976246 | 0        | 1.330334 | 0        | 0.90991  | 0.17087  | 0.131871 | 0.878429 | -0.30702 | NA       |
| AT4G12100 | AT4G12100 | 0        | 0        | 0        | 0.824831 | 1.987402 | 0        | 0.889303 | 0        | 0        | 0        | 0        | 0        | 0.483988 | NA       | 0.142943 | NA       | 0        | NA       |
| AT4G12110 | SMO1-1    | 240.1586 | 181.9931 | 221.4765 | 165.7911 | 154.3549 | 146.5356 | 158.296  | 139.1768 | 153.2706 | 196.7048 | 188.9074 | 183.3555 | -0.45905 | 0.00518  | -0.5129  | 0.00273  | -0.18466 | 0.543164 |
| AT4G12115 | AT4G12115 | 0        | 0        | 0        | 0        | 0        | 0        | 0        | 0        | 0        | 0        | 0        | 0        | #N/A     | #N/A     | #N/A     | #N/A     | #N/A     | #N/A     |
| AT4G12120 | SEC1B     | 114.1348 | 99.91778 | 83.69753 | 180.2256 | 183.5034 | 246.2197 | 280.1306 | 296.6947 | 169.8668 | 86.35821 | 69.17737 | 68.36983 | 0.983262 | 5.38E-05 | 1.270341 | 1.24E-07 | -0.38779 | 0.381298 |
| AT4G12130 | AT4G12130 | 67.76752 | 64.23286 | 51.50617 | 53.61402 | 37.76063 | 55.82308 | 59.58333 | 71.20674 | 52.71728 | 55.65307 | 55.87403 | 55.93895 | -0.30557 | 0.2882   | -0.001   | 0.998029 | -0.12382 | 0.837272 |
| AT4G12135 | AT4G12135 | 0        | 0        | 0        | 0        | 0        | 0        | 1.07889  | 0        | 0        | 0.959536 | 0        | 0        | 0        | NA       | 0.156853 | NA       | 0.149599 | NA       |
| AT4G12140 | AT4G12140 | 0        | 0        | 0        | 0        | 0        | 0        | 0        | 0        | 0        | 0        | 0        | 0        | #N/A     | #N/A     | #N/A     | #N/A     | #N/A     | #N/A     |
| AT4G12150 | AT4G12150 | 0        | 0        | 0        | 0.662467 | 0        | 0        | 0        | 0        | 0        | 0        | 0        | 0        | 0.128567 | NA       | 0        | NA       | 0        | NA       |
| AT4G12160 | AT4G12160 | 4.755616 | 7.136984 | 6.438272 | 12.78488 | 8.612075 | 11.96209 | 5.335821 | 3.23667  | 4.88123  | 5        | 5.321336 | 4.143626 | 0.73578  | 0.210841 | -0.29254 | 0.692642 | -0.65778 | NA       |
| AT4G12170 | AT4G12170 | 0        | 0        | 0        | 0        | 0        | 0        | 0        | 0        | 0.976246 | 0        | 0        | 0        | 0        | NA       | 0.16673  | NA       | 0        | NA       |
| AT4G12180 | AT4G12180 | 0        | 0        | 0        | 0        | 0        | 0        | 0.889303 | 0        | 0        | 0        | 1.330334 | 1.035907 | 0        | NA       | 0.162563 | NA       | 0.384227 | NA       |
| AT4G12190 | AT4G12190 | 0        | 0        | 0        | 0        | 0        | 0        | 0        | 0        | 0        | 0        | 0        | 0        | #N/A     | #N/A     | #N/A     | #N/A     | #N/A     | #N/A     |
| AT4G12200 | AT4G12200 | 3.566712 | 3.568492 | 7.725926 | 5.361402 | 4.637271 | 2.990522 | 8.893035 | 3.23667  | 4.88123  | 4.797678 | 6.65167  | 6.215439 | -0.1253  | 0.868104 | 0.14166  | 0.860014 | 0.153054 | NA       |
| AT4G12210 | AT4G12210 | 0        | 0        | 0        | 0        | 0        | 0        | 0        | 0        | 0        | 0        | 0        | 0        | #N/A     | #N/A     | #N/A     | #N/A     | #N/A     | #N/A     |
| AT4G12220 | AT4G12220 | 0        | 0        | 0        | 0        | 0        | 0        | 0        | 0        | 0        | 0        | 1.330334 | 0        | 0        | NA       | 0        | NA       | 0.172362 | NA       |
| AT4G12230 | AT4G12230 | 299.6038 | 289.0479 | 370.8445 | 344.367  | 339.8457 | 361.8532 | 372.6182 | 354.9548 | 287.0163 | 264.8318 | 222.1658 | 331.4901 | 0.118192 | 0.590197 | 0.076338 | 0.758338 | -0.22264 | 0.502394 |
| AT4G12240 | AT4G12240 | 30.9115  | 37.46917 | 28.3284  | 42.89122 | 30.47349 | 41.86731 | 35.57214 | 33.44559 | 53.69353 | 36.46235 | 27.93701 | 26.93357 | 0.250394 | 0.503025 | 0.334059 | 0.388428 | -0.05589 | 0.950218 |
| AT4G12250 | GAE5      | 124.8349 | 82.07532 | 82.40988 | 100.217  | 91.42048 | 110.6493 | 97.82338 | 115.4412 | 115.197  | 67.16749 | 63.85603 | 71.47755 | 0.04176  | 0.887583 | 0.161025 | 0.56313  | -0.50717 | 0.141567 |
| AT4G12260 | AT4G12260 | 0        | 0        | 0        | 0        | 0        | 0        | 0        | 0        | 0        | 0        | 0        | 0        | #N/A     | #N/A     | #N/A     | #N/A     | #N/A     | #N/A     |
| AT4G12270 | AT4G12270 | 2.377808 | 0        | 0        | 0        | 0        | 0        | 0        | 0        | 0        | 0        | 0        | 0        | -0.32938 | NA       | -0.31889 | NA       | -0.31551 | NA       |
| AT4G12275 | AT4G12275 | 0        | 0        | 1.287654 | 0        | 0        | 0        | 0.889303 | 0        | 0        | 0        | 0        | 0        | -0.21946 | NA       | -0.0473  | NA       | -0.20113 | NA       |
| AT4G12280 | AT4G12280 | 0        | 0        | 0        | 0        | 0        | 0        | 0.889303 | 1.07889  | 0        | 0        | 0        | 0        | 0        | NA       | 0.3225   | NA       | 0        | NA       |
| AT4G12290 | AT4G12290 | 296.0371 | 353.2807 | 310.3247 | 1240.134 | 1323.61  | 1201.193 | 1724.359 | 1538.497 | 1462.417 | 339.6756 | 452.3135 | 334.5978 | 1.94695  | 2.86E-44 | 2.270249 | 5.1E-60  | 0.225429 | 0.402692 |
| AT4G12300 | CYP706A4  | 196.1692 | 176.6404 | 181.5593 | 249.099  | 259.0247 | 221.2987 | 285.4664 | 226.5669 | 193.2967 | 186.1499 | 183.5861 | 169.8887 | 0.388437 | 0.036258 | 0.339133 | 0.088694 | -0.04189 | 0.929099 |
| AT4G12310 | CYP706A5  | 155.7464 | 178.4246 | 163.5321 | 113.8267 | 125.8688 | 134.5735 | 322.8172 | 291.3003 | 280.1826 | 165.9997 | 190.2378 | 183.3555 | -0.4104  | 0.016239 | 0.840223 | 0.066-08 | 0.116959 | 0.73594  |
| AT4G12320 | CYP706A6  | 911.8893 | 926.0237 | 906.5087 | 355.0898 | 367.0069 | 346.9006 | 1004.913 | 987.1843 | 915.7187 | 1194.622 | 1339.646 | 1191.293 | -1.34754 | 9.81E-41 | 0.083539 | 0.529228 | 0.436899 | 0.000406 |
| AT4G12330 | CYP706A7  | 0        | 1.784246 | 2.575309 | 1.237247 | 0.662467 | 0        | 1.07889  | 1.952492 | 5.757214 | 0        | 2.071813 | 0        | -0.33136 | 0.650935 | -0.16599 | 0.839843 | 0.41697  | NA       |
| AT4G12334 | AT4G12334 | 0        | 0        | 1.287654 | 0        | 0        | 0        | 0        | 0        | 0        | 0        | 0        | 0        | -0.2184  | NA       | -0.20558 | NA       | -0.19918 | NA       |
| AT4G12340 | AT4G12340 | 153.3686 | 169.5034 | 199.5864 | 246.2121 | 276.9113 | 190.3966 | 188.5323 | 198.5157 | 332.8999 | 130.4968 | 143.6761 | 199.93   | 0.433617 | 0.112474 | 0.44188  | 0.121699 | -0.13307 | 0.817029 |
| AT4G12350 | MYB42     | 0        | 1.784246 | 1.287654 | 2.062078 | 2.124935 | 3.987363 | 1.778607 | 2.15778  | 0.976246 | 1.919071 | 1.330334 | 1.035907 | 0.561647 | 0.432625 | 0.267505 | 0.745072 | 0.190612 | NA       |
| AT4G12360 | AT4G12360 | 0        | 0        | 0        | 0        | 0        | 0        | 1.07889  | 0        | 0        | 0        | 0        | 1.035907 | 0        | NA       | 0.157605 | NA       | 0.157555 | NA       |
| AT4G12370 | AT4G12370 | 0        | 0        | 0        | 0        | 0        | 0.996841 | 1.778607 | 0        | 0        | 0        | 1.330334 | 1.035907 | 0.111183 | NA       | 0.291088 | NA       | 0.34914  | NA       |
| AT4G12380 | AT4G12380 | 0        | 0        | 0        | 0        | 0        | 0        | 0        | 0        | 0        | 0        | 0        | 0        | #N/A     | #N/A     | #N/A     | #N/A     | #N/A     | #N/A     |
| AT4G12382 | AT4G12382 | 3.566712 | 1.784246 | 1.287654 | 2.062078 | 7.28714  | 6.977885 | 5.335821 | 11.86779 | 8.786214 | 1.919071 | 3.991002 | 1.035907 | 0.686156 | 0.30558  | 1.220367 | 0.057927 | -0.04642 | NA       |
| AT4G12390 | PME1      | 78.46766 | 89.2123  | 65.67037 | 60.62509 | 53.65985 | 61.80413 | 60.47264 | 69.04896 | 104.4583 | 79.64146 | 63.85603 | 91.15977 | -0.38085 | 0.177987 | 0.011727 | 0.975367 | 0.024282 | 0.974426 |
| AT4G12400 | HOP3      | 32.10041 | 17.84246 | 25.75309 | 25.56977 | 25.17376 | 32.89575 | 31.12562 | 23.73558 | 27.33489 | 26.867   | 38.57969 | 33.14901 | 0.079379 | 0.856637 | 0.082848 | 0.86395  | 0.307785 | 0.63581  |
| AT4G12405 | AT4G12405 | 0        | 0        | 0        | 0        | 0        | 0        | 0        | 0        | 0        | 0        | 0        | 0        | #N/A     | #N/A     | #N/A     | #N/A     | #N/A     | #N/A     |
| AT4G12410 | AT4G12410 | 3.566712 | 1.784246 | 2.575309 | 2.886909 | 1.324935 | 1.993682 | 3.557214 | 4.31556  | 5.857476 | 0        | 0        | 3.10772  | -0.19347 | 0.81071  | 0.485965 | 0.526016 | -0.57982 | NA       |
| AT4G12420 | SKU5      | 2828.402 | 2528.277 | 2465.858 | 1150.227 | 1160.643 | 1407.539 | 1198.781 | 1389.61  | 1343.314 | 2505.348 | 2572.866 | 2511.037 | -1.06548 | 1.16E-20 | -0.98355 | 1.51E-17 | -0.0438  | 0.879579 |
| AT4G12423 | AT4G12423 | 0        | 1.784246 | 1.287654 | 0        | 0        | 0        | 0        | 0        | 0        | 0        | 0        | 0        | -0.50693 | NA       | -0.48251 | NA       | -0.47569 | NA       |
| AT4G12426 | AT4G12426 | 0        | 0        | 0        | 0.824831 | 0        | 0        | 0        | 0        | 0        | 0        | 1.330334 | 0        | 0.140102 | NA       | 0        | NA       | 0.173173 | NA       |
| AT4G12430 | TPPF      | 0        | 0        | 0        | 0        | 0        | 0        | 0        | 0        | 0        | 0        | 0        | 0        | #N/A     | #N/A     | #N/A     | #N/A     | #N/A     | #N/A     |
| AT4G12432 | CPuORF26  | 0        | 0        | 0        | 0        | 0        | 0        | 0        | 0        | 0        | 0        | 0        | 0        | #N/A     | #N/A     | #N/A     | #N/A     | #N/A     | #N/A     |
| AT4G12440 | APT4      | 4.755616 | 1.784246 | 1.287654 | 2.474493 | 3.312336 | 0        | 1.778607 | 1.07889  | 1.952492 | 1.919071 | 1.330334 | 1.035907 | -0.17208 | 0.833784 | -0.34777 | 0.666383 | -0.41106 | NA       |
| AT4G12450 | AT4G12450 | 1.188904 | 3.568492 | 0        | 0.824831 | 2.649869 | 1.993682 | 0        | 2.15778  | 0.976246 | 2.878607 | 0        | 4.143626 | 0.110018 | 0.895318 | -0.19325 | 0.817854 | 0.324915 | NA       |
| AT4G12460 | ORP2B     | 278.2035 | 262.2842 | 263.9691 | 232.6024 | 239.8132 | 241.2355 | 320.1493 | 294.537  | 307.5175 | 295.537  | 305.9768 | 281.7666 | -0.17557 | 0.232008 | 0.193997 | 0.204628 | 0.1294   | 0.612836 |
| AT4G12470 | AZ11      | 19.02246 | 21.41095 | 12.87654 | 153.0062 | 155.0173 | 135.5703 | 121.8346 | 113.2834 | 142.5319 | 23.02886 | 66.5167  | 21.75404 | 2.781064 | 1.55E-17 | 2.556595 | 1.04E-14 | 0.876252 | 0.09848  |
| AT4G12480 | EARL1     | 38.04493 | 42.8219  | 28.3284  | 209.5071 | 247.7628 | 203.3555 | 255.2301 | 214.6991 | 263.5864 | 32.62421 | 55.87403 | 22.78994 | 2.486872 | 0.10E-24 | 2.632323 | 1.21E-27 | -0.00452 | 0.969026 |
| AT4G12490 | AT4G12490 | 19.02246 | 73.15409 | 27.04074 | 192.1857 | 225.9013 | 123.6088 | 168.7537 | 169.3857 | 197.2017 | 34.54328 | 29.26735 | 24.86176 | 2.062604 | 1.51E-10 | 2.08496  | 1.17E-10 | -0.33008 | 0.636411 |
| AT4G12500 | AT4G12500 | 8.322328 | 10.70548 | 7.725926 | 25.98218 | 31.13596 | 19.93682 | 32.01493 | 33.44559 | 28.31113 | 14.39303 | 7.982004 | 12.43088 | 1.343577 | 0.000979 | 1.583939 | 0.000113 | 0.327636 | 0.716392 |
| AT4G12510 | AT4G12510 | 3.566712 | 0        | 0.510617 | 0        | 0.662467 | 0        | 0        | 0        | 0        | 1.919071 | 2.660668 | 2.071813 | -1.2352  | 0.046626 | -1.2852  | 0.038389 | -0.2     |          |



|           |           |          |          |          |          |          |          |          |          |          |          |          |          |          |           |          |          |           |          |          |           |          |          |           |          |
|-----------|-----------|----------|----------|----------|----------|----------|----------|----------|----------|----------|----------|----------|----------|----------|-----------|----------|----------|-----------|----------|----------|-----------|----------|----------|-----------|----------|
| AT4G13620 | ERF062    | 3.566712 | 0        | 0        | 0.412416 | 0.662467 | 0        | 0        | 0        | 0        | 0        | 0        | 0        | 0        | 0         | 0        | 0        | 0         | 0        | -0.34884 | NA        | -0.56208 | NA       | -0.55173  | NA       |
| AT4G13630 | AT4G13630 | 198.547  | 178.4246 | 198.2988 | 167.8531 | 168.9292 | 175.444  | 169.857  | 179.0957 | 244.0615 | 188.066  | 138.3547 | 168.8528 | -0.1692  | 0.442708  | 0.038821 | 0.886681 | -0.2073   | 0.561641 | -0.18019 | 0.204617  | 0.192341 | 0.198904 | 0.043893  | 0.889374 |
| AT4G13640 | UNE16     | 340.0265 | 406.8081 | 405.6111 | 445.8212 | 447.8279 | 406.711  | 452.6555 | 436.9504 | 424.667  | 407.8026 | 404.4215 | 372.9264 | 0.18019  | 0.204617  | 0.038821 | 0.886681 | -0.2073   | 0.561641 | -0.18019 | 0.204617  | 0.192341 | 0.198904 | 0.043893  | 0.889374 |
| AT4G13650 | PCMP-H42  | 67.76752 | 55.31163 | 59.2321  | 30.93117 | 41.73544 | 51.83572 | 56.02612 | 66.89118 | 34.16861 | 49.89585 | 58.53469 | 55.93895 | -0.55644 | 0.070636  | -0.21177 | 0.568364 | -0.15082  | 0.817365 | -0.55644 | 0.070636  | -0.21177 | 0.568364 | -0.15082  | 0.817365 |
| AT4G13660 | PRR2      | 1.188904 | 5.352738 | 3.862963 | 13.60971 | 14.57428 | 10.96525 | 12.45025 | 14.02557 | 11.71495 | 2.878607 | 2.660668 | 2.078113 | 1.510785 | 0.004239  | 1.443405 | 0.009014 | -0.24121  | NA       | 1.510785 | 0.004239  | 1.443405 | 0.009014 | -0.24121  | NA       |
| AT4G13670 | PTAC5     | 549.2736 | 476.3937 | 526.6506 | 422.726  | 392.1806 | 407.7079 | 534.4714 | 567.4961 | 641.3936 | 514.3111 | 561.4009 | 594.6103 | -0.34332 | 0.100258  | 1.61467  | 0.292829 | 0.100204  | 0.706832 | -0.34332 | 0.100258  | 1.61467  | 0.292829 | 0.100204  | 0.706832 |
| AT4G13680 | AT4G13680 | 1.188904 | 0        | 2.575309 | 4.124156 | 3.974804 | 4.984204 | 8.003731 | 7.55223  | 6.833722 | 2.878607 | 2.660668 | 4.176326 | 0.834061 | 0.200098  | 1.433014 | 0.021891 | 0.559051  | NA       | 0.834061 | 0.200098  | 1.433014 | 0.021891 | 0.559051  | NA       |
| AT4G13690 | AT4G13690 | 11.88904 | 12.48972 | 10.30123 | 9.485558 | 12.58688 | 8.971567 | 8.893053 | 7.55223  | 13.66744 | 20.15025 | 19.95501 | 17.61041 | -0.13564 | 0.813337  | -0.13564 | 0.813337 | -0.13564  | 0.813337 | -0.13564 | 0.813337  | -0.13564 | 0.813337 | -0.13564  | 0.813337 |
| AT4G13700 | ATPAP23   | 0        | 0        | 0        | 0        | 0        | 0        | 0        | 0        | 0        | 0        | 0        | 0        | 0        | 0         | 0        | 0        | 0         | 0        | 0        | 0         | 0        | 0        | 0         | 0        |
| AT4G13710 | AT4G13710 | 66.57862 | 67.80135 | 57.94445 | 41.65397 | 43.72284 | 31.8989  | 41.79726 | 49.62894 | 36.1211  | 67.16749 | 89.13238 | 50.75942 | -0.65643 | 0.019208  | -0.65643 | 0.019208 | -0.65643  | 0.019208 | -0.65643 | 0.019208  | -0.65643 | 0.019208 | -0.65643  | 0.019208 |
| AT4G13720 | AT4G13720 | 210.436  | 198.0513 | 247.2296 | 289.1033 | 282.2111 | 225.286  | 225.8831 | 206.068  | 269.4439 | 262.9128 | 295.3341 | 241.3662 | 0.278067 | 0.147738  | 0.091579 | 0.701847 | 0.091579  | 0.701847 | 0.091579 | 0.701847  | 0.091579 | 0.701847 | 0.091579  | 0.701847 |
| AT4G13730 | AT4G13730 | 249.6698 | 206.9725 | 244.6543 | 224.7665 | 274.2615 | 239.2418 | 231.2189 | 255.6969 | 220.6316 | 234.1267 | 246.1118 | 218.5763 | 0.063199 | 0.754318  | 0.003623 | 0.987508 | 0.003623  | 0.987508 | 0.063199 | 0.754318  | 0.003623 | 0.987508 | 0.003623  | 0.987508 |
| AT4G13750 | NOV       | 168.8244 | 108.839  | 99.14938 | 59.38784 | 48.36011 | 75.7599  | 83.59453 | 10.0468  | 48.8123  | 94.99403 | 93.12338 | 89.08796 | -0.99359 | 0.000639  | -0.60822 | 0.055969 | -0.42335  | 0.395535 | -0.99359 | 0.000639  | -0.60822 | 0.055969 | -0.42335  | 0.395535 |
| AT4G13760 | AT4G13760 | 0        | 0        | 0        | 0        | 0        | 0        | 0        | 0        | 0        | 0        | 0        | 0        | #N/A     | #N/A      | #N/A     | #N/A     | #N/A      | #N/A     | #N/A     | #N/A      | #N/A     | #N/A     | #N/A      | #N/A     |
| AT4G13770 | CYP83A1   | 3680.847 | 2576.451 | 2880.483 | 1568.004 | 1322.285 | 1473.331 | 1323.284 | 1375.585 | 1328.671 | 3342.063 | 3049.125 | 3289.003 | -1.05235 | 9.76E-15  | -1.16669 | 8.92E-18 | -0.081137 | 0.794194 | -1.05235 | 9.76E-15  | -1.16669 | 8.92E-18 | -0.081137 | 0.794194 |
| AT4G13780 | AT4G13780 | 685.9976 | 672.6608 | 584.5951 | 460.2558 | 494.8631 | 586.1424 | 584.2724 | 614.9673 | 545.7215 | 518.1492 | 432.3585 | 578.0358 | -0.33338 | 0.037226  | -0.15243 | 0.416495 | -0.33723  | 0.145392 | -0.33338 | 0.037226  | -0.15243 | 0.416495 | -0.33723  | 0.145392 |
| AT4G13790 | AT4G13790 | 0        | 0        | 0        | 0        | 1.324935 | 0.996841 | 3.557214 | 2.15778  | 6.22878  | 0        | 1.330334 | 0        | 0.319269 | 0.636655  | 1.194072 | 0.046131 | 0.171371  | NA       | 0.319269 | 0.636655  | 1.194072 | 0.046131 | 0.171371  | NA       |
| AT4G13800 | AT4G13800 | 102.2457 | 103.4863 | 140.3543 | 42.4788  | 43.72284 | 34.88943 | 88.04104 | 57.18117 | 63.45599 | 207.2597 | 204.8714 | 192.6786 | -1.44656 | 0.396111  | -0.70044 | 0.002648 | 0.781318  | 0.002677 | -1.44656 | 0.396111  | -0.70044 | 0.002648 | 0.781318  | 0.002677 |
| AT4G13810 | ATRLP47   | 385.2049 | 454.9827 | 356.6803 | 608.7254 | 604.8326 | 695.7949 | 775.4726 | 649.4917 | 482.2655 | 404.924  | 401.7609 | 370.8545 | 0.661263 | 0.000234  | 0.661835 | 0.000296 | -0.01951  | 0.970574 | 0.661263 | 0.000234  | 0.661835 | 0.000296 | -0.01951  | 0.970574 |
| AT4G13820 | AT4G13820 | 27.34479 | 28.54794 | 33.47901 | 178.1635 | 202.715  | 203.3555 | 169.857  | 126.2301 | 146.4369 | 15.35257 | 18.62468 | 16.5745  | 2.594053 | 1.37E-28  | 2.206283 | 3.48E-20 | -0.74943  | 0.102486 | 2.594053 | 1.37E-28  | 2.206283 | 3.48E-20 | -0.74943  | 0.102486 |
| AT4G13830 | ATJ20     | 889.3002 | 1043.784 | 875.605  | 772.8668 | 812.1849 | 598.1045 | 831.4988 | 744.4341 | 827.9156 | 1200.379 | 1917.011 | 886.736  | -0.34762 | 0.176813  | -0.21733 | 0.452245 | 0.492196  | 0.164979 | -0.34762 | 0.176813  | -0.21733 | 0.452245 | 0.492196  | 0.164979 |
| AT4G13840 | CER26     | 987.9792 | 1000.962 | 869.1667 | 489.1249 | 545.2106 | 584.1487 | 404.6331 | 539.445  | 657.0136 | 745.5592 | 779.5757 | 694.0574 | -0.80588 | 1.58E-06  | -0.81954 | 1.37E-05 | -0.35765  | 0.174906 | -0.80588 | 1.58E-06  | -0.81954 | 1.37E-05 | -0.35765  | 0.174906 |
| AT4G13850 | RBG2      | 422.0609 | 358.6335 | 390.1593 | 699.4568 | 734.0137 | 604.0855 | 404.6331 | 531.8927 | 997.7234 | 349.271  | 332.5835 | 389.5009 | 0.762101 | 0.003621  | 0.689176 | 0.011043 | -0.12297  | 0.836955 | 0.762101 | 0.003621  | 0.689176 | 0.011043 | -0.12297  | 0.836955 |
| AT4G13860 | AT4G13860 | 1.188904 | 0        | 0        | 4.536571 | 3.974804 | 1.993682 | 0.889303 | 3.23667  | 3.904984 | 0.995936 | 3.991002 | 0        | 1.07968  | 0.09793   | 0.781015 | 0.271295 | 0.406932  | NA       | 1.07968  | 0.09793   | 0.781015 | 0.271295 | 0.406932  | NA       |
| AT4G13870 | WEX       | 41.61164 | 60.66437 | 61.80741 | 46.19054 | 57.63465 | 58.81361 | 52.46891 | 45.31338 | 44.98858 | 40.3005  | 66.5167  | 55.93895 | -0.01345 | 0.971635  | -0.20425 | 0.567357 | -0.01357  | 0.987439 | -0.01345 | 0.971635  | -0.20425 | 0.567357 | -0.01357  | 0.987439 |
| AT4G13880 | ATRLP48   | 59.4452  | 67.80135 | 56.65679 | 62.27475 | 62.93439 | 67.78517 | 67.58706 | 67.97007 | 45.88356 | 46.05771 | 59.86503 | 63.1903  | 0.070614 | 0.829191  | -0.01008 | 0.978224 | -0.11324  | 0.850121 | 0.070614 | 0.829191  | -0.01008 | 0.978224 | -0.11324  | 0.850121 |
| AT4G13885 | AT4G13885 | 1.188904 | 0        | 2.575309 | 4.124156 | 3.974804 | 4.984204 | 8.003731 | 7.55223  | 6.833722 | 2.878607 | 2.660668 | 4.176326 | -0.24308 | 0.692033  | -0.17089 | 0.805948 | -0.24308  | 0.692033 | -0.17089 | 0.805948  | -0.24308 | 0.692033 | -0.17089  | 0.805948 |
| AT4G13890 | SHM5      | 4.755616 | 16.05821 | 5.150617 | 72.17273 | 83.47088 | 58.81361 | 9.782338 | 14.02557 | 20.50117 | 0.995936 | 1.330334 | 1.035907 | 2.848442 | 1.36E-12  | 0.711598 | 0.169615 | -1.49823  | 0.03885  | 2.848442 | 1.36E-12  | 0.711598 | 0.169615 | -1.49823  | 0.03885  |
| AT4G13900 | ATRLP49   | 292.4704 | 294.4006 | 217.6136 | 519.6436 | 584.9586 | 601.095  | 385.0684 | 334.4559 | 234.299  | 187.1094 | 145.0064 | 187.4991 | 1.056702 | 0.653E-08 | 0.24161  | 0.324108 | -0.60335  | 0.033499 | 1.056702 | 0.653E-08 | 0.24161  | 0.324108 | -0.60335  | 0.033499 |
| AT4G13918 | AT4G13918 | 5.94452  | 7.136984 | 5.150617 | 27.44943 | 2.649869 | 2.990522 | 2.66791  | 2.15778  | 5.87476  | 11.51443 | 3.991002 | 4.143626 | -0.7929  | 0.213609  | -0.50279 | 0.485124 | 0.132306  | NA       | -0.7929  | 0.213609  | -0.50279 | 0.485124 | 0.132306  | NA       |
| AT4G13920 | ATRLP50   | 0        | 0        | 0        | 0        | 0        | 0        | 0        | 0        | 0        | 0        | 0        | 0        | #N/A     | #N/A      | #N/A     | #N/A     | #N/A      | #N/A     | #N/A     | #N/A      | #N/A     | #N/A     | #N/A      | #N/A     |
| AT4G13930 | SHM4      | 1114.003 | 868.9278 | 813.7975 | 533.2533 | 524.0116 | 581.1582 | 536.25   | 520.025  | 628.7024 | 837.6746 | 929.9034 | 912.6337 | -0.76373 | 1.12E-07  | -0.72175 | 8.28E-07 | -0.06305  | 0.855952 | -0.76373 | 1.12E-07  | -0.72175 | 8.28E-07 | -0.06305  | 0.855952 |
| AT4G13940 | SAH11     | 10198.42 | 8619.693 | 9211.879 | 6649.789 | 6747.229 | 6988.851 | 5952.998 | 6705.301 | 7001.636 | 7591.846 | 7520.378 | 7937.116 | -0.45651 | 1.04E-05  | -0.50838 | 8.43E-07 | -0.28046  | 0.055119 | -0.45651 | 1.04E-05  | -0.50838 | 8.43E-07 | -0.28046  | 0.055119 |
| AT4G13950 | RALFL31   | 51.12287 | 51.74313 | 56.65679 | 62.68717 | 57.63465 | 48.8452  | 47.13308 | 36.68226 | 62.47974 | 73.88424 | 42.57069 | 79.7648  | 0.090953 | 0.807678  | -0.11566 | 0.773716 | 0.295869  | 0.85616  | 0.090953 | 0.807678  | -0.11566 | 0.773716 | 0.295869  | 0.85616  |
| AT4G13955 | AT4G13955 | 0        | 0        | 0        | 0.412416 | 0        | 0        | 0        | 0        | 0        | 0        | 0        | 0        | 0.095918 | NA        | 0        | NA       | 0         | NA       | 0.095918 | NA        | 0        | NA       | 0         | NA       |
| AT4G13960 | AT4G13960 | 0        | 0        | 0        | 0        | 0        | 0.996841 | 0.889303 | 2.15778  | 0        | 0        | 1.330334 | 0        | 0.111714 | NA        | 0.471921 | NA       | 0.190027  | NA       | 0.111714 | NA        | 0.471921 | NA       | 0.190027  | NA       |
| AT4G13965 | AT4G13965 | 0        | 0        | 0        | 0        | 0        | 0        | 0        | 0        | 0        | 0        | 0        | 0        | #N/A     | #N/A      | #N/A     | #N/A     | #N/A      | #N/A     | #N/A     | #N/A      | #N/A     | #N/A     | #N/A      | #N/A     |
| AT4G13968 | AT4G13968 | 0        | 0        | 0        | 0        | 0        | 0        | 0        | 0        | 0        | 0        | 0        | 0        | #N/A     | #N/A      | #N/A     | #N/A     | #N/A      | #N/A     | #N/A     | #N/A      | #N/A     | #N/A     | #N/A      | #N/A     |
| AT4G13970 | AT4G13970 | 183.0912 | 183.7773 | 172.5457 | 117.5384 | 118.5816 | 150.523  | 150.2923 | 156.439  | 132.7695 | 151.6066 | 176.9344 | 137.7756 | -0.48415 | 0.00802   | -0.2885  | 0.162197 | -0.21041  | 0.52809  | -0.48415 | 0.00802   | -0.2885  | 0.162197 | -0.21041  | 0.52809  |
| AT4G13980 | HSF5A     | 150.9908 | 162.3664 | 140.3543 | 169.5028 | 142.4305 | 178.3435 | 170.7463 | 157.5179 | 111.292  | 159.2829 | 170.2827 | 150.2064 | 0.110946 | 0.647829  | -0.03953 | 0.890464 | 0.080195  | 0.864774 | 0.110946 | 0.647829  | -0.03953 | 0.890464 | 0.080195  | 0.864774 |
| AT4G13985 | FBD1      | 0        | 0        | 0        | 0.412416 | 0        | 0        | 0.996841 | 0        | 0        | 0.995936 | 0        | 1.035907 | 0.342914 | NA        | 0        | NA       | 0.361816  | NA       | 0.342914 | NA        | 0        | NA       | 0.3       |          |

|           |           |          |          |          |          |          |          |          |          |          |          |          |          |          |          |          |           |          |          |
|-----------|-----------|----------|----------|----------|----------|----------|----------|----------|----------|----------|----------|----------|----------|----------|----------|----------|-----------|----------|----------|
| AT4G14385 | AT4G14385 | 89.1678  | 90.99655 | 84.98519 | 127.4364 | 139.1181 | 88.71883 | 105.8271 | 107.889  | 138.6269 | 79.64146 | 97.11438 | 128.4524 | 0.41787  | 0.109957 | 0.394018 | 0.159155  | 0.194355 | 0.698852 |
| AT4G14390 | AT4G14390 | 10.70014 | 16.05821 | 9.01358  | 37.94223 | 25.17376 | 20.93366 | 7.114428 | 6.47334  | 3.904984 | 1.919071 | 0        | 6.215439 | 1.162622 | 0.103435 | -0.77677 | 0.176515  | -1.40225 | NA       |
| AT4G14400 | ACD6      | 2521.665 | 2615.705 | 2370.572 | 2789.579 | 2249.739 | 2871.898 | 1817.736 | 2006.735 | 1312.075 | 895.2467 | 832.7891 | 1013.117 | 0.074261 | 0.735535 | -0.53679 | 0.002228  | -0.42327 | 8.16E-17 |
| AT4G14403 | AT4G14403 | 1.188904 | 0        | 0        | 0.412416 | 0.662467 | 0        | 0        | 1.07889  | 0        | 0.959536 | 1.330334 | 0        | -0.04166 | NA       | -0.05931 | NA        | 0.157319 | NA       |
| AT4G14410 | BHLH104   | 403.0384 | 387.1814 | 400.4605 | 549.3375 | 494.2006 | 491.4425 | 489.1169 | 473.6327 | 666.776  | 397.2477 | 387.1272 | 422.6499 | 0.361553 | 0.025986 | 0.444445 | 0.006561  | 0.018925 | 0.96566  |
| AT4G14415 | AT4G14415 | 0        | 1.784246 | 0        | 0        | 0        | 0        | 0        | 0        | 0        | 0        | 0        | 0        | -0.2184  | NA       | -0.20558 | NA        | -0.19918 | NA       |
| AT4G14420 | AT4G14420 | 131.4928 | 296.1026 | 378.5704 | 1239.309 | 1295.786 | 1095.528 | 974.676  | 767.0907 | 1132.445 | 403.005  | 436.3495 | 421.614  | 1.713057 | 5.86E-28 | 1.381203 | 3.22E-18  | 0.213107 | 0.491396 |
| AT4G14430 | ECI2      | 254.4254 | 219.4623 | 209.8877 | 494.8987 | 469.6893 | 432.6289 | 297.2724 | 362.570  | 750.334  | 324.1267 | 172.9434 | 177.14   | 0.975061 | 0.000456 | 0.98644  | 0.00047   | -0.21334 | 0.711267 |
| AT4G14440 | ECI3      | 191.4135 | 335.4383 | 272.9827 | 309.3117 | 295.4604 | 247.2165 | 136.0634 | 161.8335 | 201.1067 | 262.9128 | 275.3791 | 235.1508 | 0.102151 | 0.706487 | -0.6503  | 0.003983  | -0.0387  | 0.946861 |
| AT4G14450 | AT4G14450 | 0        | 1.784246 | 0        | 1.13522  | 9.274542 | 9.968408 | 9.782338 | 6.47334  | 12.6912  | 0        | 1.330334 | 0        | 2.188218 | 0.000151 | 2.09389  | 0.000417  | -0.16117 | NA       |
| AT4G14455 | BET12     | 121.2682 | 115.976  | 140.3543 | 185.9994 | 245.7754 | 180.4282 | 198.3147 | 107.889  | 208.9166 | 123.7801 | 117.0694 | 172.9964 | 0.663866 | 0.011859 | 0.427271 | 0.1545321 | 0.125128 | 0.83622  |
| AT4G14460 | AT4G14460 | 0        | 0        | 0        | 0.412416 | 0        | 0.996841 | 0        | 1.07889  | 0        | 0.959536 | 1.330334 | 2.071813 | 0.212015 | NA       | 0.165012 | NA        | 0.57173  | NA       |
| AT4G14465 | AHL20     | 9.511232 | 5.352738 | 14.1642  | 22.68286 | 13.24935 | 24.92102 | 20.45398 | 14.02557 | 15.61994 | 10.55489 | 11.97301 | 9.323159 | 0.869709 | 0.058563 | 0.626188 | 0.227571  | 0.055735 | NA       |
| AT4G14470 | AT4G14470 | 0        | 0        | 0        | 0        | 0        | 0        | 0        | 0        | 0.97246  | 0        | 0        | 0        | 0.16673  | NA       | 0        | NA        | 0        | NA       |
| AT4G14480 | BLU51     | 70.14533 | 137.3869 | 141.642  | 64.33683 | 77.50867 | 73.76622 | 106.7164 | 108.9679 | 121.0545 | 105.5489 | 125.0514 | 109.8061 | -0.66056 | 0.008563 | -0.03678 | 0.916896  | -0.02558 | 0.97086  |
| AT4G14490 | AT4G14490 | 33.28931 | 17.84246 | 16.73951 | 29.69392 | 34.4483  | 32.89575 | 23.12189 | 28.05114 | 26.35864 | 29.7456  | 23.94601 | 35.22082 | 0.438488 | 0.242457 | 0.139203 | 0.773092  | 0.335853 | 0.612836 |
| AT4G14500 | AT4G14500 | 787.0544 | 727.9724 | 827.9617 | 603.364  | 586.946  | 684.8296 | 625.1803 | 696.9629 | 526.1966 | 903.8826 | 916.6001 | 804.8994 | -0.32152 | 0.027477 | -0.34002 | 0.023949  | 0.159921 | 0.53463  |
| AT4G14504 | MIR852A   | 0        | 0        | 1.287504 | 0        | 0.662467 | 0        | 0        | 0        | 0        | 0        | 1.330334 | 2.071813 | -0.14218 | NA       | -0.25929 | NA        | 0.30767  | NA       |
| AT4G14510 | ATCFM3B   | 303.1705 | 249.7944 | 244.6543 | 158.78   | 165.6168 | 156.504  | 155.6281 | 198.5157 | 202.0829 | 189.9881 | 227.4871 | 255.8689 | -0.71766 | 3.97E-05 | -0.51536 | 0.005729  | -0.24465 | 0.432245 |
| AT4G14520 | NRPF7L    | 53.50068 | 83.85956 | 66.95803 | 111.7646 | 118.5816 | 92.70619 | 98.71269 | 99.25787 | 102.5058 | 90.19635 | 74.4987  | 81.83662 | 0.672487 | 0.002306 | 0.595949 | 0.018548  | 0.28944  | 0.48169  |
| AT4G14530 | AT4G14530 | 1.188904 | 0        | 0        | 0        | 0.662467 | 0        | 0        | 0        | 0        | 0        | 0        | 0        | -0.07436 | NA       | -0.18698 | NA        | -0.18606 | NA       |
| AT4G14540 | NFYB3     | 253.2365 | 267.6369 | 252.3803 | 208.6823 | 139.1181 | 162.485  | 141.3993 | 169.3857 | 244.0615 | 331.0398 | 375.1542 | 252.7612 | -0.57006 | 0.017343 | -0.46069 | 0.072779  | 0.298876 | 0.466407 |
| AT4G14548 | AT4G14548 | 27.34479 | 44.60615 | 55.36914 | 25.56977 | 23.84882 | 24.92102 | 34.68284 | 15.10446 | 38.07359 | 43.1791  | 35.91902 | 35.22082 | -0.70133 | 0.052341 | -0.46941 | 0.24653   | -0.1293  | 0.874312 |
| AT4G14550 | IAA1A     | 181.9023 | 185.5616 | 155.8062 | 117.5384 | 116.5942 | 106.662  | 87.15174 | 81.99564 | 77.12343 | 191.9071 | 210.1928 | 196.8222 | -0.59606 | 0.000341 | -1.05741 | 1.03E-09  | 0.193441 | 0.524629 |
| AT4G14560 | IAA1      | 211.6249 | 239.089  | 316.763  | 178.9884 | 206.6898 | 161.4882 | 223.2152 | 174.7802 | 253.824  | 306.0919 | 408.4125 | 315.9515 | -0.47172 | 0.031119 | -0.22768 | 0.370859  | 0.408994 | 0.207718 |
| AT4G14570 | AT4G14570 | 388.7716 | 415.7293 | 345.0914 | 328.2828 | 305.3974 | 334.9385 | 341.4925 | 395.9526 | 305.565  | 376.138  | 348.5475 | 414.3626 | -0.24092 | 0.134971 | -0.1364  | 0.463225  | -0.00745 | 0.987026 |
| AT4G14580 | CIPK4     | 28.53369 | 42.8219  | 36.05432 | 38.35465 | 38.4231  | 27.91154 | 23.12189 | 29.04984 | 27.82653 | 35.91902 | 26.93357 | 0        | 0.06625  | 0.988535 | -0.20182 | 0.632925  | -0.21865 | 0.750218 |
| AT4G14590 | emb2739   | 24.96698 | 21.41095 | 24.46543 | 17.74993 | 29.81103 | 28.90838 | 39.12935 | 28.05114 | 20.50117 | 21.10978 | 17.29434 | 30.04129 | 0.19665  | 0.650639 | 0.278148 | 0.534547  | -0.04256 | 0.966449 |
| AT4G14600 | AT4G14600 | 74.90095 | 55.31163 | 81.12222 | 114.9509 | 162.3045 | 120.6177 | 105.8271 | 89.54786 | 123.9832 | 81.56053 | 123.7211 | 87.01615 | 0.869725 | 0.000389 | 0.554529 | 0.041466  | 0.418549 | 0.314567 |
| AT4G14605 | AT4G14605 | 230.6474 | 226.5992 | 227.9148 | 169.5028 | 179.5286 | 177.4377 | 165.4104 | 185.5691 | 152.2944 | 159.2829 | 203.5411 | 210.289  | -0.3761  | 0.025785 | -0.43929 | 0.012263  | -0.25807 | 0.351437 |
| AT4G14610 | AT4G14610 | 121.2682 | 132.0342 | 109.4506 | 183.5249 | 214.6394 | 203.3555 | 140.51   | 138.0979 | 134.7219 | 59.49121 | 73.16837 | 63.1903  | 0.720287 | 3.03E-05 | 0.1918   | 0.388977  | -0.86494 | 0.002041 |
| AT4G14615 | AT4G14615 | 141.4796 | 169.5034 | 166.1074 | 277.9681 | 233.8509 | 171.4566 | 192.9789 | 169.3857 | 290.9213 | 213.0169 | 252.7635 | 196.8222 | 0.508772 | 0.042364 | 0.438601 | 0.101197  | 0.454768 | 0.230043 |
| AT4G14620 | AT4G14620 | 0        | 0        | 0        | 0        | 0        | 0        | 0        | 0        | 0        | 0        | 0        | 0        | #N/A     | #N/A     | #N/A     | #N/A      | #N/A     | #N/A     |
| AT4G14622 | CpURF60   | 0        | 0        | 0        | 0        | 0        | 0        | 0        | 0        | 0        | 0        | 0        | 0        | #N/A     | #N/A     | #N/A     | #N/A      | #N/A     | #N/A     |
| AT4G14630 | GLP9      | 0        | 0        | 2.575309 | 20.62078 | 16.56168 | 11.96209 | 38.24005 | 35.60337 | 31.23987 | 0        | 0        | 1.035907 | 2.519877 | 1.22E-06 | 3.485921 | 4.89E-12  | -0.35338 | NA       |
| AT4G14640 | CM18      | 4.755616 | 5.352738 | 7.725926 | 23.09527 | 25.17376 | 18.93997 | 14.22866 | 14.02557 | 18.54667 | 5.757214 | 10.64267 | 3.10772  | 1.595953 | 0.000508 | 1.100767 | 0.306684  | 0.02885  | NA       |
| AT4G14650 | AT4G14650 | 23.77808 | 30.33218 | 25.75309 | 20.20836 | 19.87402 | 18.90838 | 16.00746 | 16.18335 | 12.6912  | 42.21957 | 46.56169 | 37.29264 | -0.21399 | 0.597161 | -0.73522 | 0.060573  | 0.628347 | 0.220246 |
| AT4G14660 | NRPE7     | 42.80054 | 48.17464 | 52.79383 | 62.68717 | 84.13334 | 57.81677 | 48.91169 | 62.57562 | 84.9334  | 46.05771 | 61.19536 | 51.79533 | 0.487467 | 0.103264 | 0.423367 | 0.194447  | 0.128614 | 0.849621 |
| AT4G14661 | AT4G14661 | 0        | 0        | 0        | 0        | 0        | 0        | 0        | 0        | 0        | 0        | 0        | 0        | #N/A     | #N/A     | #N/A     | #N/A      | #N/A     | #N/A     |
| AT4G14670 | CLP2B     | 0        | 0        | 0        | 0        | 0        | 0        | 0        | 1.952492 | 0        | 0        | 0        | 1.035907 | 0        | NA       | 0.279148 | 0         | 0.150772 | NA       |
| AT4G14680 | AP53      | 376.8826 | 330.0855 | 276.8457 | 202.496  | 176.8788 | 220.3018 | 241.0012 | 303.1681 | 263.5864 | 426.9934 | 383.1362 | 282.8025 | -0.69958 | 0.00031  | -0.27946 | 0.21569   | 0.147457 | 0.708209 |
| AT4G14690 | EUP2      | 1.188904 | 3.568492 | 2.575309 | 1.649662 | 1.987402 | 0        | 0        | 2.15778  | 2.928738 | 4.797678 | 3.991002 | 2.071813 | -0.40833 | 0.586662 | -0.23845 | 0.778956  | 0.36219  | NA       |
| AT4G14695 | MPC2      | 15.45575 | 8.92123  | 19.31482 | 3.299325 | 2.649869 | 0        | 0.889303 | 1.07889  | 0.976246 | 20.15025 | 22.61568 | 13.46678 | -2.03814 | 7.83E-05 | -2.42778 | 9.21E-06  | 0.310207 | NA       |
| AT4G14700 | ORC1A     | 24.96698 | 8.92123  | 16.73951 | 4.948987 | 3.312336 | 7.974726 | 7.114428 | 3.23667  | 1.952492 | 12.47396 | 23.94601 | 10.35907 | -1.55452 | 0.007203 | -1.55452 | 0.003783  | -0.13986 | NA       |
| AT4G14710 | ARD3      | 492.2062 | 563.8217 | 602.6222 | 871.8465 | 810.8599 | 782.52   | 724.7823 | 797.2997 | 982.1035 | 604.5074 | 554.7493 | 648.4775 | 0.565603 | 0.000149 | 0.526605 | 0.000105  | 1.2456   | 0.683412 |
| AT4G14713 | TIFYAA    | 41.6164  | 28.54794 | 39.91728 | 59.5919  | 45.04777 | 43.86099 | 48.02239 | 35.60337 | 51.74104 | 40.3005  | 35.91902 | 51.79533 | 0.260337 | 0.606178 | 0.180317 | 0.606178  | 0.189972 | 0.762198 |
| AT4G14716 | ARD2      | 462.4836 | 565.606  | 542.1025 | 941.9572 | 911.555  | 839.3399 | 880.4104 | 787.5897 | 1270.096 | 632.334  | 573.3739 | 724.0987 | 0.762488 | 3.37E-05 | 0.884695 | 1.33E-06  | 0.293009 | 0.349271 |
| AT4G14720 | TIFYAB    | 124.8349 | 112.4075 | 169.9704 | 185.587  | 178.8662 | 207.3429 | 201.8719 | 194.2002 | 171.8193 | 135.2945 | 111.7481 | 123.2729 | 0.463977 | 0.016239 | 0.458946 | 0.023469  | -0.138   | 0.736114 |
| AT4G14723 | EPFL4     | 2.377808 | 3.568492 | 1.287654 | 4.948987 | 5.299738 | 4.984204 | 3.557214 | 3.23667  | 1.709968 | 4.797678 | 2.660668 | 1.43626  | 0.682509 | 0.301478 | 0.627401 | 0.380054  | 0.41441  | NA       |
| AT4G14730 | AT4G14730 | 0        | 0        | 2.575309 | 2.886909 | 0.662467 | 0.996841 | 0.889303 | 0        | 0        | 2.878607 | 2.660668 | 1.035907 | 0.306927 | 0.677848 | -0.32254 | 0.666895  | 0.476694 | NA       |
| AT4G14740 | AT4G14740 | 372.1269 | 319.38   | 276.8457 | 195.485  | 170.2514 | 146.5356 | 161.8532 | 174.7802 | 163.0331 | 301.2942 | 311.2981 | 272.344  | -0.88958 | 4.89E-08 | -0.93809 | 2.1E-08   | -0.13013 | 0.701627 |
| AT4G14743 | AT4G14743 | 2.377808 | 0        | 0        | 0.412416 | 0        | 0.996841 | 0        | 0        | 0.97246  | 0        | 0        | 0        | -0.16731 | NA       | -0.23152 | NA        | -0.40756 | NA       |
| AT4G14746 | AT4G14746 | 64.20081 | 132.0342 | 99.14938 | 465.6172 | 441.2032 | 3        |          |          |          |          |          |          |          |          |          |           |          |          |

|           |           |          |          |          |          |          |          |          |          |          |          |          |           |          |          |            |           |           |          |
|-----------|-----------|----------|----------|----------|----------|----------|----------|----------|----------|----------|----------|----------|-----------|----------|----------|------------|-----------|-----------|----------|
| AT4G15140 | AT4G15140 | 47.55616 | 55.31163 | 70.82099 | 99.39215 | 115.2693 | 52.83256 | 85.37313 | 65.81229 | 116.1733 | 76.76285 | 115.7391 | 94.26749  | 0.591094 | 0.073722 | 0.577793   | 0.096918  | 0.664463  | 0.162125 |
| AT4G15150 | AT4G15150 | 0        | 0        | 0        | 2.062078 | 1.324935 | 1.993682 | 6.225124 | 0        | 2.928738 | 0        | 0        | 0         | 0.789974 | 0.208321 | 1.171461   | 0.056562  | 0         | NA       |
| AT4G15160 | DL3625W   | 5.94452  | 7.136984 | 2.575309 | 3.299325 | 1.324935 | 4.984204 | 2.66791  | 1.07889  | 5.925492 | 4.766285 | 1.330334 | 7.251346  | -0.46076 | 0.155537 | -0.80881   | 0.249278  | 0.106195  | NA       |
| AT4G15165 | PAC2      | 9.511232 | 17.84246 | 16.73951 | 23.09527 | 21.19895 | 21.9305  | 26.6791  | 17.26224 | 19.52492 | 12.47396 | 21.28534 | 18.64632  | 0.548802 | 0.199551 | 0.494676   | 0.291166  | 0.21956   | 0.80625  |
| AT4G15180 | ATXR3     | 773.9765 | 631.6231 | 557.5543 | 306.4248 | 249.7502 | 409.7016 | 435.7587 | 577.2061 | 288.9688 | 534.4613 | 476.2596 | 540.7432  | -0.98635 | 0.564522 | -0.57024   | 0.028014  | -0.325505 | 0.442556 |
| AT4G15200 | FH3       | 1.188904 | 0        | 0        | 0.412416 | 0        | 0        | 3.57214  | 0        | 3.904984 | 9.595356 | 34.58868 | 7.251346  | -0.4378  | 0.554252 | 0.711583   | 0.328301  | 0.625305  | NA       |
| AT4G15210 | BAM5      | 30.17794 | 51.74313 | 36.05432 | 20.62078 | 16.56168 | 7.974276 | 18.67537 | 28.05114 | 18.54867 | 294.5774 | 420.3855 | 125.3447  | -1.67435 | 0.001408 | -1.31067   | 0.017634  | 1.576185  | 0.801268 |
| AT4G15215 | PDRI3     | 54.68958 | 57.09587 | 47.64321 | 49.02258 | 70.7757  | 73.81219 | 84.15342 | 60.52725 | 45.09817 | 46.56169 | 59.04667 | 0         | -0.4704  | 0.903874 | -0.43819   | 0.178668  | -0.07039  | 0.924386 |
| AT4G15230 | ABC30     | 11.88904 | 14.27397 | 20.60247 | 14.02213 | 14.57428 | 20.93366 | 19.56468 | 18.34113 | 12.6912  | 12.47396 | 14.63367 | 15.5386   | 0.039362 | 0.945218 | 0.099846   | 0.865207  | -0.12157  | NA       |
| AT4G15233 | AT4G15233 | 66.57862 | 89.2123  | 75.97161 | 139.3965 | 135.8058 | 190.3966 | 181.4179 | 201.7524 | 112.2683 | 52.77446 | 47.89202 | 61.11849  | 0.964064 | 0.00015  | 1.056622   | 3.83E-05  | -0.47404  | 0.288634 |
| AT4G15236 | ABC34     | 2.377808 | 14.27397 | 15.45185 | 28.86909 | 33.78583 | 38.87679 | 72.03358 | 69.04896 | 51.74104 | 8.635821 | 10.64267 | 8.287252  | 1.103539 | 0.001999 | 2.005359   | 2.44E-09  | -0.543    | 0.456833 |
| AT4G15240 | AT4G15240 | 103.4346 | 92.78079 | 70.82099 | 73.40997 | 88.10815 | 80.7441  | 67.58706 | 80.91675 | 67.36097 | 70.0461  | 63.85603 | 69.40574  | -0.14043 | 0.599386 | -0.29945   | 0.257767  | -0.37503  | 0.319915 |
| AT4G15242 | AT4G15242 | 0        | 0        | 0        | 0        | 0        | 0        | 1.778607 | 0        | 0        | 0        | 0        | 0         | 0        | NA       | 0.26262    | NA        | 0.150298  | NA       |
| AT4G15248 | AT4G15248 | 16.64466 | 19.62671 | 10.30123 | 19.38353 | 17.22415 | 12.95893 | 6.225124 | 4.31556  | 6.833722 | 43.1791  | 51.88302 | 37.29264  | 0.131307 | 0.796758 | -1.12027   | 0.017118  | 1.401605  | 0.002443 |
| AT4G15250 | COL11     | 0        | 0        | 0        | 0        | 0        | 0        | 0        | 0        | 0        | 0        | 0        | 0         | 0        | NA       | 0          | NA        | 0         | NA       |
| AT4G15258 | SNOR37-2  | 1.188904 | 3.568492 | 3.862963 | 4.124156 | 2.649869 | 1.993682 | 2.66791  | 4.31556  | 2.928738 | 5.757214 | 3.991002 | 6.215439  | 0.055367 | 0.947998 | 0.120614   | 0.889016  | 0.608171  | NA       |
| AT4G15260 | AT4G15260 | 73.71204 | 99.91778 | 109.4506 | 186.8243 | 160.9795 | 150.523  | 172.5249 | 203.9102 | 232.3465 | 71.00564 | 83.81104 | 61.11849  | 0.80534  | 0.000157 | 1.077286   | 2.98E-07  | -0.37695  | 0.323717 |
| AT4G15270 | AT4G15270 | 0        | 0        | 0        | 10.31039 | 15.23675 | 7.974726 | 13.3995  | 8.63112  | 11.71495 | 0        | 0        | 0         | 1.759442 | 0.002085 | 1.730981   | 0.003322  | -0.84222  | NA       |
| AT4G15280 | UGT71B5   | 4.755616 | 3.568492 | 2.575309 | 19.79595 | 29.14856 | 17.94313 | 18.86977 | 32.3667  | 28.31113 | 0        | 0        | 4.143626  | 2.020827 | 4.35E-05 | 2.186412   | 1.14E-05  | -0.66396  | NA       |
| AT4G15290 | CSL85     | 1.188904 | 0        | 0        | 1.237247 | 0        | 0        | 1.778607 | 2.15778  | 0        | 0        | 1.330334 | 0         | -0.0012  | NA       | 0.363206   | NA        | -0.02367  | NA       |
| AT4G15300 | CYP702A2  | 0        | 0        | 0        | 0.824831 | 0        | 0        | 0.889303 | 0        | 0        | 0.959536 | 1.330334 | 0         | 0.152384 | NA       | 0.148191   | NA        | 0.358901  | NA       |
| AT4G15310 | CYP702A3  | 0        | 0        | 0        | 0        | 0        | 0        | 0.889303 | 1.07889  | 0        | 0.959536 | 0        | 0         | 0        | NA       | 0.340278   | NA        | 0.175396  | NA       |
| AT4G15320 | ATCSL806  | 2.377808 | 5.352738 | 3.862963 | 1.649662 | 0.662467 | 4.984204 | 4.446517 | 1.07889  | 0        | 5.757214 | 2.660668 | 1.035907  | -0.39154 | 0.603883 | -0.49537   | 0.520471  | -0.12014  | NA       |
| AT4G15330 | CYP705A1  | 0        | 0        | 0        | 0        | 0.662467 | 0        | 0        | 0        | 0        | 0        | 0        | 0         | 0.128567 | NA       | 0          | NA        | 0         | NA       |
| AT4G15340 | PEN1      | 0        | 0        | 0        | 0.824831 | 1.987402 | 0        | 0.889303 | 0        | 0        | 0        | 1.330334 | 0         | 0.484324 | NA       | 0.137636   | NA        | 0.186595  | NA       |
| AT4G15345 | CYP702A4P | 0        | 0        | 0        | 0        | 0        | 0        | 0        | 0        | 0        | 0        | 0        | 0         | 0        | NA       | 0          | NA        | 0         | NA       |
| AT4G15350 | CYP705A2  | 0        | 0        | 0        | 0        | 0        | 0        | 0.889303 | 0        | 0        | 0        | 1.330334 | 0         | 0        | NA       | 0.141773   | NA        | 0.183636  | NA       |
| AT4G15360 | CYP705A3  | 0        | 1.784246 | 0        | 0.412416 | 0        | 0        | 0.889303 | 0        | 0        | 0.959536 | 1.330334 | 1.035907  | -0.24909 | NA       | -0.11331   | NA        | 0.306186  | NA       |
| AT4G15370 | BARS1     | 0        | 0        | 0        | 0        | 0.662467 | 0        | 0        | 0        | 0        | 0        | 0        | 0         | 0.098893 | NA       | 0          | NA        | 0.150283  | NA       |
| AT4G15380 | CYP705A4  | 0        | 1.784246 | 2.575309 | 0.412416 | 1.987402 | 4.984204 | 0.889303 | 5.39445  | 2.928738 | 4.797678 | 5.321336 | 4.143626  | 0.214514 | 0.789226 | 0.469593   | 0.544305  | 0.865942  | NA       |
| AT4G15390 | AT4G15390 | 1.188904 | 0        | 0        | 0        | 0.662467 | 0        | 0        | 0        | 0        | 0        | 0        | 1.035907  | -0.09382 | NA       | -0.21476   | NA        | -0.02619  | NA       |
| AT4G15393 | CYP702A5  | 0        | 0        | 0        | 0        | 1.324935 | 0        | 0        | 0        | 0        | 0        | 0        | 0         | 0.21675  | NA       | 0          | NA        | 0         | NA       |
| AT4G15396 | CYP702A6  | 1.188904 | 0        | 2.575309 | 1.649662 | 1.324935 | 0        | 0        | 0        | 0        | 0        | 0        | 0         | -0.03046 | NA       | -0.63599   | NA        | -0.6183   | NA       |
| AT4G15398 | CYP702A7P | 0        | 0        | 0        | 0        | 0        | 0        | 0        | 0        | 0        | 0        | 0        | 0         | 0        | NA       | 0          | NA        | 0         | NA       |
| AT4G15400 | AT4G15400 | 0        | 0        | 0        | 1.237247 | 0        | 0        | 0        | 0        | 0        | 0.976246 | 0.959536 | 0         | 0.20978  | NA       | 0.138561   | NA        | 0.143191  | NA       |
| AT4G15410 | PUX5      | 136.724  | 123.113  | 82.40988 | 108.8777 | 117.9192 | 131.583  | 113.8308 | 112.2046 | 131.7932 | 118.9824 | 127.7121 | 73.54936  | 0.059132 | 0.854702 | 0.063549   | 0.854993  | -0.0956   | 0.86931  |
| AT4G15415 | B'GAMMA   | 467.2393 | 412.1608 | 372.1321 | 322.9214 | 326.5964 | 379.7963 | 400.1866 | 367.9015 | 273.3489 | 331.9993 | 343.2262 | 379.1418  | -0.28147 | 0.129531 | -0.26028   | 0.189464  | -0.2432   | 0.416844 |
| AT4G15417 | ATRTL1    | 1.188904 | 0        | 0        | 0.402213 | 15.23675 | 11.96209 | 14.22886 | 10.7889  | 11.71495 | 0        | 0        | 0.2071813 | 2.543589 | 4.23E-06 | 2.362006   | 3.22E-05  | -0.0465   | NA       |
| AT4G15420 | AT4G15420 | 234.2141 | 237.3047 | 231.7778 | 278.3805 | 280.2237 | 284.0996 | 288.1343 | 298.8525 | 257.7289 | 216.8551 | 242.1208 | 215.4686  | 0.257462 | 0.081157 | 0.261089   | 0.0959782 | -0.06311  | 0.851906 |
| AT4G15430 | AT4G15430 | 67.76752 | 39.25341 | 47.64321 | 30.10634 | 28.48609 | 33.89259 | 16.00746 | 16.18335 | 8.786214 | 48.93632 | 46.56169 | 31.0772   | -0.71752 | 0.025884 | -1.75332   | 2.42E-07  | -0.29018  | 0.630253 |
| AT4G15440 | CYP74B2   | 79.65566 | 66.0171  | 52.79383 | 69.28582 | 52.99738 | 60.80727 | 20.20077 | 240.5925 | 217.7029 | 98.83217 | 83.81104 | 74.85827  | -0.1118  | 0.702397 | 1.688665   | 3.51E-16  | 0.356421  | 0.316664 |
| AT4G15450 | AT4G15450 | 198.547  | 158.7979 | 230.4901 | 111.3522 | 100.0326 | 98.68724 | 132.5062 | 128.3879 | 125.9357 | 203.4216 | 226.1568 | 171.9605  | -0.9037  | 5.63E-07 | -0.59872   | 0.001925  | 0.019023  | 0.970982 |
| AT4G15460 | AT4G15460 | 0        | 0        | 0        | 0        | 0        | 0        | 1.07889  | 0        | 0        | 0        | 0        | 0         | 0        | NA       | 0.156853   | NA        | 0.149599  | NA       |
| AT4G15470 | AT4G15470 | 680.0531 | 681.582  | 655.4161 | 871.0217 | 894.9933 | 820.4    | 746.1256 | 782.1952 | 863.0015 | 509.5134 | 476.2596 | 549.0305  | 0.357625 | 0.001943 | 0.243579   | 0.05345   | -0.38788  | 0.010751 |
| AT4G15475 | FLB4      | 254.4254 | 251.5787 | 296.1605 | 217.7554 | 204.0399 | 239.2418 | 284.5771 | 289.1425 | 236.2515 | 246.6007 | 252.7635 | 248.6176  | -0.28258 | 0.080543 | 0.010972   | 0.9061278 | -0.10253  | 0.752644 |
| AT4G15480 | UGT84A1   | 8.322328 | 5.352738 | 9.01358  | 5.73818  | 4.637271 | 3.987363 | 4.46517  | 2.15778  | 2.928738 | 10.55489 | 5.321336 | 10.35907  | -0.48748 | 0.433214 | -0.88135   | 0.161321  | 0.178056  | NA       |
| AT4G15490 | UGT84A3   | 191.4135 | 181.9931 | 164.8198 | 154.2434 | 147.0677 | 113.6398 | 194.7575 | 228.7247 | 264.5627 | 204.3811 | 232.8084 | 213.3967  | -0.35285 | 0.074217 | 0.345108   | 0.090909  | 0.264478  | 0.407006 |
| AT4G15500 | UGT84A4   | 34.47821 | 39.25341 | 41.20494 | 34.64291 | 41.07297 | 42.86415 | 14.22886 | 18.34113 | 26.35864 | 17.27164 | 21.28534 | 23.82585  | 0.041413 | 0.924513 | -0.88696   | 0.01154   | -0.81077  | 0.094676 |
| AT4G15510 | PPD1      | 410.1719 | 417.5136 | 467.4185 | 293.2275 | 340.5082 | 257.1849 | 285.664  | 282.6692 | 284.0876 | 566.126  | 742.3264 | 510.7019  | -0.52615 | 0.002507 | -0.59185   | 0.000839  | 0.477346  | 0.038778 |
| AT4G15520 | AT4G15520 | 115.3237 | 121.3287 | 126.1901 | 175.689  | 214.6394 | 187.4061 | 152.7009 | 137.019  | 164.9856 | 125.6992 | 115.7391 | 105.6625  | 0.656029 | 0.000218 | 0.318439   | 1.12501   | -0.06058  | 0.974485 |
| AT4G15530 | PPDK      | 602.7743 | 496.0204 | 464.8432 | 666.0512 | 629.3439 | 716.7285 | 481.1132 | 568.575  | 417.8333 | 467.2939 | 381.8058 | 427.8292  | 0.354546 | 0.034509 | -0.09321   | 0.66277   | -0.28659  | 0.279009 |
| AT4G15540 | AT4G15540 | 618.2301 | 747.5991 | 657.9914 | 993.0967 | 1029.474 | 1017.774 | 969.3408 | 828.5875 | 647.2511 | 614.1028 | 590.6683 | 667.1238  | 0.580126 | 0.0002   | 0.271539   | 0.126749  | -0.10728  | 0.748116 |
| AT4G15545 | AT4G15545 | 2998.416 | 3837.913 | 3604.145 | 2345.82  | 2304.061 | 2315.661 | 3146.356 | 3294.93  | 2592.909 | 2927.543 | 2924.074 | 3338.727  | -0.57574 | 1.77E-05 | -0.2054    | 0.189857  | -0.18076  | 0.452999 |
| AT4G15550 | UGT75D1   | 191.4135 | 176.6404 | 168.6827 | 118.3633 | 138.4557 | 103.6714 | 66.69776 | 63.65451 | 54.66978 | 145.8494 | 162.3007 | 143.991   | -0.55518 | 0.00027  | -1.49352   | 2.7E-15   | -0.24698  | 0.442937 |
| AT4G15560 | DXS       | 8468.563 | 8178.984 | 7268.809 | 3099.715 | 2823.436 | 3492.93  | 2609.216 | 2781.378 | 1774.815 | 7131.269 | 7149.215 | 6666.059  | -1.31972 | 6.25E-17 | -1.70581</ |           |           |          |

|           |           |          |          |          |          |          |          |          |          |          |          |          |          |          |          |          |          |          |          |    |
|-----------|-----------|----------|----------|----------|----------|----------|----------|----------|----------|----------|----------|----------|----------|----------|----------|----------|----------|----------|----------|----|
| AT4G15975 | ATL17     | 15.45575 | 8.92123  | 2.575309 | 24.33252 | 23.18635 | 26.9147  | 17.78607 | 11.86779 | 23.4299  | 7.676285 | 5.321336 | 5.179533 | 1.235119 | 0.00687  | 0.799318 | 0.121819 | -0.43675 | NA       |    |
| AT4G15980 | PME43     | 0        | 0        | 0        | 0        | 0        | 0        | 0        | 0        | 0        | 0        | 0        | 0        | 0        | 0        | 0        | 0        | 0        | 0.172362 | NA |
| AT4G15990 | AT4G15990 | 2.377808 | 1.784246 | 6.438272 | 1.649662 | 0.662467 | 1.993682 | 1.778607 | 2.15778  | 4.88123  | 1.919071 | 0        | 0        | 0        | 0        | 0        | 0        | -0.53576 | NA       |    |
| AT4G16000 | AT4G16000 | 32.10041 | 32.11643 | 38.62963 | 39.5919  | 52.99738 | 31.8989  | 34.68284 | 19.42002 | 41.00233 | 40.3005  | 30.59768 | 48.68761 | 0.262206 | 0.500201 | -0.09974 | 0.83465  | 0.206838 | 0.77299  |    |
| AT4G16008 | AT4G16008 | 45.17835 | 23.1952  | 4.50679  | 16.90904 | 24.51129 | 13.95577 | 22.23259 | 11.86779 | 10.73871 | 30.70514 | 49.22236 | 27.96948 | -0.94073 | 0.014808 | -1.19189 | 0.003162 | -0.09991 | 0.914481 |    |
| AT4G16010 | AT4G16010 | 1.188904 | 0        | 1.287654 | 0.412416 | 0        | 0        | 0.662467 | 0        | 1.07889  | 0        | 0        | 0        | -0.23284 | NA       | -0.26035 | NA       | -0.46802 | NA       |    |
| AT4G16015 | AT4G16015 | 2.377808 | 8.92123  | 12.87654 | 2.886909 | 1.987402 | 3.987363 | 5.335821 | 0        | 5.857476 | 7.676285 | 7.982004 | 7.251346 | -0.99086 | 0.1083   | -0.71447 | 0.293838 | -0.03009 | NA       |    |
| AT4G16020 | AT4G16020 | 1.188904 | 0        | 0        | 0        | 0        | 0        | 1.778607 | 0        | 0        | 0        | 0        | 0        | -0.21078 | NA       | 0.091088 | NA       | -0.1879  | NA       |    |
| AT4G16024 | AT4G16024 | 0        | 0        | 0        | 0        | 0        | 0        | 0        | 0        | 0        | 0        | 0        | 0        | #N/A     | #N/A     | #N/A     | #N/A     | #N/A     | #N/A     |    |
| AT4G16030 | AT4G16030 | 0        | 0        | 0        | 0.412416 | 0        | 0        | 0        | 0        | 0        | 0        | 0        | 0        | 0.065109 | NA       | 0        | NA       | 0.150531 | NA       |    |
| AT4G16040 | AT4G16040 | 0        | 0        | 0        | 0        | 0        | 0        | 0        | 0        | 0        | 0        | 0        | 0        | #N/A     | #N/A     | #N/A     | #N/A     | #N/A     | #N/A     |    |
| AT4G16045 | AT4G16045 | 0        | 0        | 0        | 0        | 0        | 0        | 0        | 0        | 0        | 0        | 0        | 0        | #N/A     | #N/A     | #N/A     | #N/A     | #N/A     | #N/A     |    |
| AT4G16050 | AT4G16050 | 2.377808 | 1.784246 | 2.575309 | 0.412416 | 1.987402 | 0        | 0.889303 | 1.07889  | 0        | 0.959536 | 0        | 1.035907 | -0.57411 | 0.404887 | -0.6497  | 0.350111 | -0.61417 | NA       |    |
| AT4G16060 | AT4G16060 | 162.8798 | 157.0137 | 185.4222 | 223.5292 | 244.4504 | 196.3776 | 221.4366 | 224.4091 | 263.5864 | 236.0458 | 246.1118 | 268.2998 | 0.388231 | 0.023498 | 0.475582 | 0.006346 | 0.555357 | 0.009182 |    |
| AT4G16070 | AT4G16070 | 147.4241 | 153.4452 | 142.9296 | 127.4364 | 104.6698 | 119.6209 | 136.6304 | 157.5179 | 74.1947  | 151.6066 | 151.6581 | 136.7397 | -0.31913 | 0.224427 | -0.26086 | 0.365444 | -0.0107  | 0.988019 |    |
| AT4G16080 | AT4G16080 | 0        | 0        | 0        | 0        | 0        | 0        | 0        | 0        | 0        | 0        | 0        | 0        | #N/A     | #N/A     | #N/A     | #N/A     | #N/A     | #N/A     |    |
| AT4G16090 | AT4G16090 | 0        | 0        | 0        | 0        | 0        | 0        | 0        | 0        | 0        | 0        | 0        | 0        | 0        | NA       | 0        | NA       | 0.172362 | NA       |    |
| AT4G16095 | AT4G16095 | 0        | 0        | 0        | 0        | 0        | 0        | 0        | 0        | 0        | 0        | 0        | 0        | #N/A     | #N/A     | #N/A     | #N/A     | #N/A     | #N/A     |    |
| AT4G16100 | AT4G16100 | 52.31177 | 44.60615 | 61.80741 | 72.58514 | 79.49607 | 59.81045 | 65.80846 | 62.57562 | 79.07593 | 30.70514 | 50.55269 | 46.61579 | 0.397722 | 0.156512 | 0.357765 | 0.242466 | -0.32243 | 0.524933 |    |
| AT4G16105 | AT4G16105 | 0        | 0        | 0        | 0        | 0        | 0        | 0        | 0        | 0        | 0        | 0        | 0        | #N/A     | #N/A     | #N/A     | #N/A     | #N/A     | #N/A     |    |
| AT4G16110 | ARR2      | 162.8798 | 139.1712 | 133.9161 | 175.689  | 143.7554 | 183.4187 | 176.0821 | 194.2002 | 120.0783 | 122.8206 | 127.7121 | 128.4524 | 0.194816 | 0.042086 | 0.159762 | 0.546635 | -0.20013 | 0.626348 |    |
| AT4G16120 | COB17     | 190.2246 | 123.113  | 97.86173 | 80.83345 | 72.8714  | 94.69987 | 78.25871 | 94.94231 | 60.52725 | 106.5085 | 117.0694 | 105.6625 | -0.70882 | 0.006189 | -0.78709 | 0.003235 | -0.31543 | 0.493509 |    |
| AT4G16130 | ARA1      | 418.4942 | 306.8903 | 298.7358 | 262.2963 | 215.9643 | 287.0901 | 257.898  | 330.1403 | 192.3205 | 273.4677 | 315.2892 | 305.5924 | -0.41271 | 0.068869 | -0.38495 | 0.108524 | -0.19393 | 0.641169 |    |
| AT4G16140 | AT4G16140 | 174.7689 | 99.91778 | 105.5877 | 76.7093  | 86.78321 | 92.70619 | 72.92289 | 48.55005 | 66.38473 | 118.0229 | 152.9884 | 102.5547 | -0.56295 | 0.034819 | -0.97342 | 0.000254 | -0.04181 | 0.951963 |    |
| AT4G16141 | AT4G16141 | 303.1705 | 219.4623 | 291.0099 | 318.3848 | 380.2562 | 317.9922 | 267.6803 | 257.8547 | 418.8095 | 433.7101 | 437.6799 | 332.526  | 0.305147 | 0.022228 | 0.202068 | 0.405243 | 0.540466 | 0.079514 |    |
| AT4G16143 | IMPA2     | 1045.047 | 879.6333 | 861.4408 | 642.5435 | 594.8956 | 711.7443 | 625.1803 | 715.304  | 666.776  | 673.594  | 614.6143 | 685.7701 | -0.51373 | 0.000073 | -0.47022 | 0.000433 | -0.49176 | 0.002443 |    |
| AT4G16144 | AMSH3     | 137.9129 | 157.0137 | 144.2173 | 154.2434 | 111.2945 | 155.5072 | 159.1853 | 133.7824 | 93.71962 | 110.3466 | 98.44471 | 134.6678 | -0.05508 | 0.857321 | -0.17106 | 0.562412 | -0.33312 | 0.411432 |    |
| AT4G16146 | AT4G16146 | 49.9397  | 85.64381 | 105.5877 | 242.5004 | 261.6746 | 182.4219 | 346.8284 | 298.8525 | 558.4127 | 148.728  | 146.3367 | 140.8833 | 1.430332 | 1.13E-07 | 2.200427 | 4.18E-17 | 0.803813 | 0.035349 |    |
| AT4G16150 | CMTA5     | 676.4863 | 587.0169 | 512.4864 | 411.5970 | 344.483  | 459.5436 | 448.209  | 507.0783 | 388.5459 | 405.8836 | 324.6015 | 373.9623 | -0.53931 | 0.001902 | -0.39569 | 0.033482 | -0.66917 | 0.001462 |    |
| AT4G16155 | LPD2      | 911.8893 | 786.0648 | 925.8235 | 507.2712 | 482.2762 | 556.2372 | 677.4689 | 771.4063 | 618.94   | 905.8016 | 1015.045 | 904.3464 | -0.80643 | 6.92E-11 | -0.32792 | 0.016923 | 0.055371 | 0.853499 |    |
| AT4G16160 | OEPI2     | 3.566712 | 0        | 5.150617 | 2.474493 | 0.662467 | 2.960522 | 2.66791  | 2.15778  | 2.928738 | 3.838143 | 0        | 1.413626 | -0.33191 | 0.66689  | -0.12997 | 0.883269 | -0.07378 | NA       |    |
| AT4G16162 | AT4G16162 | 7.133424 | 3.568492 | 5.150617 | 3.299325 | 9.274542 | 9.968408 | 5.335821 | 3.23667  | 3.904984 | 2.878607 | 2.660668 | 0.103907 | 0.333311 | 0.632989 | -0.24541 | 0.757178 | -0.77727 | NA       |    |
| AT4G16165 | AT4G16165 | 0        | 0        | 0        | 0        | 0        | 0        | 0        | 0        | 0        | 0        | 0        | 0        | #N/A     | #N/A     | #N/A     | #N/A     | #N/A     | #N/A     |    |
| AT4G16180 | AT4G16180 | 531.4401 | 490.6677 | 502.1852 | 400.4555 | 336.5334 | 426.6479 | 487.3383 | 522.1827 | 385.6172 | 490.3227 | 457.6349 | 453.7271 | -0.3869  | 0.013868 | -0.12761 | 0.505372 | -0.11966 | 0.699234 |    |
| AT4G16190 | AT4G16190 | 3414.532 | 4583.728 | 3829.484 | 5979.201 | 5783.339 | 5584.302 | 8197.599 | 8831.793 | 8519.699 | 3748.906 | 3551.992 | 3767.592 | 0.548563 | 3.27E-06 | 1.101581 | 1.52E-22 | -0.09334 | 0.702755 |    |
| AT4G16195 | AT4G16195 | 0        | 0        | 0        | 0.412416 | 0        | 0        | 0        | 0        | 0        | 0        | 0        | 0        | 0.095918 | NA       | 0        | NA       | 0        | NA       |    |
| AT4G16200 | AT4G16200 | 0        | 0        | 0        | 0        | 0        | 0        | 0        | 0        | 0        | 0        | 0        | 0        | #N/A     | #N/A     | #N/A     | #N/A     | #N/A     | #N/A     |    |
| AT4G16210 | ECHIA     | 139.1018 | 132.0342 | 121.0395 | 268.0701 | 206.0273 | 219.305  | 168.0784 | 183.4113 | 196.2254 | 126.6587 | 129.0424 | 120.1652 | 0.812569 | 3.25E-06 | 0.468896 | 0.015937 | -0.06213 | 0.892182 |    |
| AT4G16215 | AT4G16215 | 0        | 0        | 0        | 0        | 0        | 0        | 0        | 0        | 1.952492 | 0        | 0        | 0        | 0        | NA       | 0.255433 | NA       | 0        | NA       |    |
| AT4G16220 | AT4G16220 | 0        | 0        | 0        | 0        | 0        | 0        | 0        | 0        | 0        | 0.959536 | 0        | 0        | 0        | NA       | 0        | NA       | 0.171512 | NA       |    |
| AT4G16230 | AT4G16230 | 2.377808 | 0        | 1.287654 | 0.412416 | 0.662467 | 0        | 1.778607 | 2.15778  | 0        | 0.959536 | 1.330334 | 0        | -0.4926  | 0.459854 | 0.019531 | 0.980879 | -0.24665 | NA       |    |
| AT4G16235 | AT4G16235 | 0        | 0        | 0        | 0        | 0        | 0        | 0        | 0        | 0        | 0        | 0        | 0        | #N/A     | #N/A     | #N/A     | #N/A     | #N/A     | #N/A     |    |
| AT4G16240 | AT4G16240 | 2.377808 | 1.784246 | 0        | 7.835896 | 9.274542 | 4.984204 | 2.66791  | 3.23667  | 0        | 2.878607 | 0        | 6.215439 | 1.246    | 0.050139 | 1.140927 | 0.089216 | 0.449875 | NA       |    |
| AT4G16250 | PHYD      | 193.7913 | 264.0684 | 222.7642 | 135.6847 | 113.2819 | 158.4977 | 199.204  | 262.1703 | 158.5119 | 161.202  | 142.3457 | 148.1346 | -0.12653 | 0.000989 | -0.12681 | 0.652605 | -0.5635  | 0.066486 |    |
| AT4G16260 | AT4G16260 | 35.66712 | 28.54794 | 43.78025 | 166.2035 | 155.6798 | 170.4598 | 417.9726 | 403.5048 | 489.0992 | 17.27164 | 21.28534 | 24.86176 | 2.079141 | 2.86E-22 | 3.471276 | 9.24E-63 | -0.72728 | 0.073815 |    |
| AT4G16265 | NRPB98    | 27.34479 | 23.1952  | 37.34198 | 42.89122 | 37.09817 | 32.89557 | 33.79353 | 21.5778  | 37.09735 | 29.7456  | 27.93701 | 35.22082 | 0.338766 | 0.348973 | 0.058994 | 0.900768 | 0.062001 | 0.943997 |    |
| AT4G16267 | AT4G16267 | 0        | 0        | 0        | 0        | 0        | 0        | 0        | 0        | 0        | 0        | 0        | 0        | #N/A     | #N/A     | #N/A     | #N/A     | #N/A     | #N/A     |    |
| AT4G16270 | PER40     | 13.07794 | 17.84246 | 7.725926 | 4.536571 | 4.637271 | 2.990522 | 8.893035 | 3.23667  | 1.952492 | 23.98839 | 15.96401 | 13.46678 | -1.241   | 0.017722 | -1.06125 | 0.060393 | 0.446208 | NA       |    |
| AT4G16280 | FCA       | 225.8917 | 206.9725 | 208.6    | 244.9749 | 202.0525 | 234.2576 | 275.6841 | 230.8824 | 183.5342 | 192.8667 | 224.8264 | 215.4686 | 0.084145 | 0.715583 | 0.102764 | 0.6698   | -0.02337 | 0.963091 |    |
| AT4G16295 | SPH1      | 0        | 0        | 0        | 0        | 0        | 0        | 0        | 0        | 0        | 0        | 0        | 0        | #N/A     | #N/A     | #N/A     | #N/A     | #N/A     | #N/A     |    |
| AT4G16310 | LDL3      | 341.2154 | 308.6746 | 251.0926 | 147.2324 | 155.6798 | 181.425  | 226.7724 | 227.6458 | 141.5557 | 209.1788 | 220.8354 | 248.6176 | -0.87657 | 1.46E-05 | -0.57912 | 0.007369 | -0.39698 | 0.220003 |    |
| AT4G16330 | AT4G16330 | 280.5813 | 281.9109 | 300.0235 | 380.2472 | 422.6541 | 412.6921 | 377.954  | 373.2959 | 385.6172 | 262.9128 | 240.7904 | 266.228  | 0.485696 | 0.000124 | 0.39319  | 0.003512 | -0.1596  | 0.518609 |    |
| AT4G16340 | SPK1      | 605.1521 | 460.3355 | 405.6111 | 193.8353 | 162.3045 | 222.2956 | 224.9938 | 256.7758 | 181.5818 | 175.1784 | 341.8958 | 391.5727 | -1.31878 | 1.18E-12 | -1.1225  | 3.21E-09 | -0.39875 | 0.179952 |    |
| AT4G16350 | CB16      | 4.755616 | 7.136984 | 5.150617 | 3.299325 | 6.624763 | 3.987363 | 4.446517 | 1.07889  | 2.928738 | 0        | 2.660668 | 5.179533 | -0.16332 | 0.834291 | -0.59577 | 0.414303 | -0.6767  | NA       |    |
| AT4G16355 | AT4G16355 | 1.188904 | 0        | 2.575309 | 0        | 1.987402 | 1.993682 | 0        | 0        | 0.976246 | 0.959536 | 0        | 3.10772  | -0.01646 | 0.983726 | -0.43429 | 0.52771  | 0.037581 | NA       |    |
| AT4G16360 | KINB2     | 355.4823 | 378.2602 | 363.1185 | 320.8593 | 333.8835 | 277.1217 | 315.7027 | 316.1148 | 309.7336 | 405.8836 | 369.8328 | 371.8904 | -0.22367 | 0.116841 | -0.17066 | 0.280178 | 0.068534 | 0.818874 |    |
| AT4G16370 | ATOP73    | 728.7981 | 579.88   | 473.8568 | 562.5348 | 460.4148 | 508.3888 | 366.393  | 485.5005 | 374.8785 | 414.5194 | 361.8508 |          |          |          |          |          |          |          |    |



|           |             |           |          |          |          |           |          |          |          |          |          |          |          |          |          |           |            |          |          |
|-----------|-------------|-----------|----------|----------|----------|-----------|----------|----------|----------|----------|----------|----------|----------|----------|----------|-----------|------------|----------|----------|
| AT4G16748 | AT4G16748   | 1.188904  | 0        | 0        | 25.6977  | 25.6977   | 0        | 0.996841 | 0        | 0        | 0.959536 | 0        | 1.035907 | -0.08505 | NA       | -0.24732  | NA         | 0.135916 | NA       |
| AT4G16750 | ERF039      | 20.21137  | 8.92123  | 20.60247 | 25.56977 | 25.83622  | 15.94945 | 29.34701 | 18.34113 | 36.1211  | 20.15025 | 14.63367 | 31.0772  | 0.362632 | 0.442641 | 0.627069  | 0.174228   | 0.323677 | 0.696168 |
| AT4G16760 | ACX1        | 1022.457  | 920.671  | 973.6647 | 1164.662 | 1104.995  | 1273.962 | 1122.301 | 1129.598 | 1027.987 | 879.8942 | 973.9621 | 809.043  | 0.275178 | 0.028973 | 0.165794  | 0.241016   | -0.12376 | 0.594257 |
| AT4G16765 | AT4G16765   | 101.0568  | 133.8185 | 132.6284 | 155.4807 | 171.579   | 125.6019 | 142.2886 | 134.8612 | 106.4108 | 112.2657 | 127.7121 | 84.94434 | 0.305873 | 0.206544 | 0.067188  | 0.831626   | -0.1708  | 0.712038 |
| AT4G16770 | AT4G16770   | 200.9248  | 255.1472 | 278.1333 | 127.4364 | 109.6966  | 126.5988 | 133.3955 | 139.1768 | 100.5533 | 276.3463 | 230.1478 | 300.4129 | -0.98308 | 1.59E-07 | -0.94792  | 9.68E-07   | 0.140636 | 0.71872  |
| AT4G16780 | HAT4        | 348.3489  | 451.4142 | 381.1457 | 195.0726 | 181.516   | 186.4092 | 128.0597 | 128.3879 | 118.1258 | 279.2249 | 286.0218 | 254.833  | -1.04295 | 1.08E-13 | -1.6208   | 6.56E-28   | -0.51237 | 0.006153 |
| AT4G16790 | AT4G16790   | 153.3686  | 103.4863 | 135.2037 | 125.7868 | 106.6572  | 136.5672 | 140.51   | 98.17898 | 111.292  | 142.9708 | 154.3187 | 122.37   | -0.10228 | 0.704435 | -0.16722  | 0.54047    | 0.078127 | 0.879034 |
| AT4G16800 | AT4G16800   | 80.84547  | 80.29107 | 90.1358  | 101.8666 | 102.6824  | 106.662  | 171.4428 | 86.3112  | 114.2208 | 98.83217 | 73.16837 | 149.1705 | 0.290315 | 0.330432 | 0.10279   | 0.780446   | 0.343243 | 0.467997 |
| AT4G16807 | AT4G16807   | 29.7226   | 19.62671 | 25.75309 | 18.14629 | 26.49869  | 26.9147  | 20.45398 | 16.18335 | 18.54867 | 23.02886 | 33.25835 | 37.29264 | -0.112   | 0.807566 | -0.41595  | 0.343318   | 0.264642 | 0.713129 |
| AT4G16810 | AT4G16810   | 0         | 0        | 0        | 0.662467 | 0         | 0        | 0        | 1.07889  | 0        | 0        | 0        | 0        | 0.098648 | NA       | 0.150881  | NA         | 0        | NA       |
| AT4G16820 | PLA-[beta]2 | 1.188904  | 1.784246 | 2.575309 | 2.886909 | 2.649869  | 0.996841 | 2.66791  | 3.23667  | 9.76246  | 2.878607 | 1.330334 | 1.035907 | 0.120862 | 0.884941 | 0.867177  | 0.219367   | -0.03865 | NA       |
| AT4G16830 | AT4G16830   | 1197.226  | 1190.092 | 1048.151 | 1031.864 | 1042.061  | 965.9387 | 945.3296 | 1129.598 | 1410.675 | 996.9575 | 965.8225 | 949.9263 | -0.17268 | 0.313667 | 0.020656  | 0.925506   | -0.2339  | 0.355051 |
| AT4G16835 | DYW10       | 32.10041  | 26.76369 | 37.34198 | 37.1174  | 25.83622  | 46.85152 | 53.35821 | 51.78672 | 22.45366 | 31.66468 | 42.57069 | 32.1131  | 0.148324 | 0.743861 | 0.360443  | 0.404461   | 0.110146 | 0.89957  |
| AT4G16840 | AT4G16840   | 36.85602  | 44.60615 | 46.35556 | 82.89553 | 104.6698  | 87.72199 | 90.70896 | 59.33895 | 123.007  | 44.13864 | 62.5257  | 22.78994 | 1.025983 | 0.001772 | 0.1016907 | 0.002602   | 0.001224 | 0.998453 |
| AT4G16845 | VRN2        | 186.6579  | 228.3835 | 213.7506 | 309.7241 | 331.2336  | 331.948  | 332.5995 | 291.3003 | 208.9166 | 262.9128 | 321.9408 | 233.079  | 0.616463 | 0.001805 | 0.399596  | 0.066081   | 0.369221 | 0.241305 |
| AT4G16850 | AT4G16850   | 48.74506  | 74.93833 | 70.82099 | 71.34789 | 86.12075  | 82.73778 | 68.47637 | 61.49673 | 50.76479 | 39.34096 | 47.89202 | 46.61579 | 0.303928 | 0.265379 | -0.08281  | 0.81595    | -0.50277 | 0.224956 |
| AT4G16855 | AT4G16855   | 2.377808  | 0        | 0        | 0        | 0         | 0        | 0        | 1.07889  | 0.976246 | 0        | 0        | 0        | -0.45161 | NA       | -0.05348  | NA         | -0.406   | NA       |
| AT4G16860 | RPP4        | 1999.736  | 1966.239 | 1814.305 | 1728.846 | 1710.49   | 2221.958 | 2246.381 | 2231.144 | 1447.773 | 1526.621 | 1517.911 | 1638.804 | -0.03067 | 0.902216 | -0.03067  | 0.890996   | -0.29685 | 0.309635 |
| AT4G16870 | AT4G16870   | 1054.558  | 818.9689 | 799.6333 | 534.903  | 477.6389  | 649.9402 | 819.0485 | 829.6664 | 520.3391 | 828.0792 | 925.9124 | 813.1866 | -0.67007 | 0.000835 | -0.29458  | 0.200732   | -0.05853 | 0.904164 |
| AT4G16880 | AT4G16880   | 598.0187  | 704.7772 | 595.2729 | 595.1157 | 584.2961  | 537.2972 | 743.4577 | 555.6283 | 504.7192 | 818.4839 | 831.4587 | 802.8276 | -0.08187 | 0.299391 | -0.11562  | 0.562019   | 0.318888 | 0.183986 |
| AT4G16890 | SN1         | 2817.702  | 2626.41  | 2262.409 | 1914.846 | 1720.428  | 2607.735 | 2729.272 | 2905.541 | 1654.731 | 2137.845 | 2237.622 | 2356.687 | -0.29521 | 0.213252 | -0.07781  | 0.793832   | -0.18895 | 0.64996  |
| AT4G16892 | AT4G16892   | 39.23383  | 35.68492 | 37.34198 | 33.40566 | 37.76063  | 36.88311 | 26.6791  | 35.60337 | 25.3824  | 46.05771 | 41.24035 | 34.18492 | -0.06411 | 0.86382  | -0.34648  | 0.338653   | -0.04635 | 0.880443 |
| AT4G16900 | AT4G16900   | 260.37    | 276.5581 | 226.6272 | 148.4696 | 121.2315  | 201.3618 | 216.99   | 264.328  | 161.0806 | 211.0978 | 238.1298 | 212.3608 | -0.68149 | 0.0023   | -0.24005  | 0.368653   | -0.19922 | 0.643032 |
| AT4G16910 | AT4G16910   | 14.26685  | 14.27397 | 14.1642  | 3.299235 | 0.662467  | 10.96525 | 8.893035 | 6.47334  | 1.952492 | 14.39303 | 10.64267 | 12.43088 | -1.23761 | 0.025151 | -0.96745  | 0.106243   | -0.13429 | NA       |
| AT4G16915 | AT4G16915   | 4.755616  | 3.568492 | 2.575309 | 0.248311 | 1.324935  | 0.996841 | 1.778607 | 0        | 0.926246 | 1.919071 | 1.330334 | 2.071813 | -0.93519 | 0.165523 | -0.93009  | 0.185503   | -0.55422 | NA       |
| AT4G16920 | AT4G16920   | 647.9527  | 726.1881 | 611.6358 | 457.3689 | 445.8405  | 651.9339 | 772.8047 | 805.9308 | 326.0662 | 544.0567 | 492.2236 | 586.3231 | -0.33622 | 0.268898 | -0.05634  | 0.884884   | -0.27533 | 0.590128 |
| AT4G16930 | AT4G16930   | 0         | 0        | 0        | 0        | 0         | 0        | 0        | 0.889303 | 0        | 0        | 0        | 0        | 0        | NA       | 0         | NA         | 0        | NA       |
| AT4G16935 | AT4G16935   | 0         | 0        | 0        | 0        | 0         | 0        | 0        | 1.07889  | 0        | 0        | 0        | 0        | 0        | NA       | 0.16673   | NA         | 0        | NA       |
| AT4G16940 | AT4G16940   | 129.5905  | 153.4452 | 119.7519 | 85.37002 | 37.09817  | 106.662  | 128.0597 | 129.4668 | 57.59851 | 107.468  | 113.0784 | 82.87252 | -0.75046 | 0.034254 | -0.32196  | 0.439952   | -0.37341 | 0.554206 |
| AT4G16950 | RPP5        | 2415.853  | 2335.578 | 2007.453 | 1687.605 | 1599.858  | 2333.604 | 2315.746 | 2531.076 | 1643.998 | 1754.031 | 1757.371 | 1964.079 | -0.26053 | 0.218055 | -0.05694  | 0.832182   | -0.29613 | 0.348955 |
| AT4G16960 | AT4G16960   | 215.1916  | 215.8938 | 185.4222 | 202.0836 | 190.1281  | 293.0712 | 230.3296 | 254.618  | 124.9595 | 146.809  | 152.9884 | 140.8883 | 0.141186 | 0.649566 | -0.01442  | 0.968699   | -0.46221 | 0.254433 |
| AT4G16970 | AT4G16970   | 53.50068  | 64.23286 | 57.94445 | 30.51875 | 27.82363  | 34.88943 | 31.12562 | 51.78672 | 19.52492 | 67.16749 | 54.54369 | 68.36983 | -0.73041 | 0.026753 | -0.73041  | 0.026753   | 0.122453 | 0.86037  |
| AT4G16980 | AT4G16980   | 3393.132  | 2563.962 | 2367.996 | 1116.821 | 1125.5302 | 1097.522 | 684.7637 | 710.9885 | 1097.3   | 2663.671 | 3005.224 | 1884.316 | -1.27485 | 1.29E-09 | -1.68218  | 4.99E-10   | -0.13647 | 0.76911  |
| AT4G16990 | RLM3        | 4238.443  | 4887.05  | 4175.863 | 3440.783 | 2983.09   | 4188.725 | 2795.081 | 2802.956 | 1375.765 | 3572.351 | 3579.929 | 3596.667 | -0.31799 | 0.121769 | -0.83762  | 7.69E-06   | -0.29962 | 0.392981 |
| AT4G17000 | AT4G17000   | 67.76752  | 55.31163 | 72.10864 | 77.53413 | 77.50867  | 73.76622 | 56.91542 | 48.55005 | 59.55101 | 67.16749 | 71.83803 | 82.87252 | 0.212429 | 0.414941 | -0.24334  | 0.39832    | 0.164915 | 0.731963 |
| AT4G17005 | AT4G17005   | 0         | 1.784246 | 0        | 0        | 0         | 0        | 0        | 0        | 0.925373 | 0        | 0        | 0        | -0.26756 | NA       | -0.24986  | NA         | -0.06955 | NA       |
| AT4G17010 | AT4G17010   | 83.22328  | 87.42806 | 99.14938 | 185.587  | 171.579   | 164.4787 | 154.7388 | 165.0702 | 167.9143 | 129.5373 | 117.0694 | 97.37521 | 0.932967 | 2.68E-07 | -0.29957  | 1.13E-05   | 0.33887  | 0.292233 |
| AT4G17020 | AT4G17020   | 162.8798  | 148.0924 | 145.5049 | 167.0283 | 175.5538  | 166.4724 | 205.4291 | 166.1491 | 161.0806 | 133.3755 | 174.2738 | 167.8169 | 0.151166 | 0.474326 | 0.217900  | 0.309588   | 0.048244 | 0.917194 |
| AT4G17030 | EXL18       | 52.31177  | 51.74313 | 54.08148 | 38.76706 | 32.4609   | 50.83888 | 41.79726 | 31.28781 | 60.52725 | 62.36982 | 39.91002 | 46.61579 | -0.36942 | 0.270247 | -0.22404  | 0.059761   | -0.07013 | 0.927935 |
| AT4G17040 | CLP4        | 2079.393  | 2685.29  | 2433.667 | 2183.328 | 2233.84   | 2305.693 | 2690.143 | 2750.09  | 2550.931 | 2305.764 | 2284.183 | 2448.883 | -0.09639 | 0.479378 | 0.151185  | 0.258484   | -0.03008 | 0.917371 |
| AT4G17050 | UGYRA       | 412.5497  | 440.7088 | 442.9531 | 376.9478 | 374.9565  | 328.9575 | 394.8507 | 380.8481 | 461.7644 | 561.3283 | 530.8033 | 500.3429 | -0.25266 | 0.077271 | -0.06432  | 0.724886   | 0.295348 | 0.141442 |
| AT4G17060 | FIP2        | 133.1572  | 160.5821 | 141.642  | 159.6048 | 163.6294  | 154.5103 | 126.2811 | 145.6501 | 187.4392 | 142.0113 | 154.3187 | 125.3447 | 0.139952 | 0.541288 | 0.081477  | 0.759144   | -0.04131 | 0.935197 |
| AT4G17070 | AT4G17070   | 84.41218  | 107.0548 | 96.57408 | 273.9638 | 189.4656  | 183.4187 | 123.6132 | 170.4646 | 152.2944 | 66.20796 | 75.82904 | 64.2262  | 1.079395 | 8.37E-08 | 0.618347  | 0.00345    | -0.45994 | 0.190931 |
| AT4G17080 | AT4G17080   | 222.325   | 244.4417 | 236.9284 | 273.3143 | 254.3874  | 263.166  | 262.3445 | 279.4325 | 213.7979 | 212.0574 | 227.4871 | 210.289  | 0.171219 | 0.318764 | 0.1033    | 0.605112   | -0.11214 | 0.729573 |
| AT4G17085 | AT4G17085   | 4.755616  | 8.92123  | 3.826923 | 7.42348  | 7.28714   | 3.987363 | 6.225124 | 4.31556  | 23.4299  | 8.388143 | 7.982004 | 10.35907 | 0.098406 | 0.898917 | 0.718243  | 0.273836   | 0.245456 | NA       |
| AT4G17090 | BAM3        | 1470.674  | 1580.842 | 1198.806 | 1197.655 | 1061.935  | 1488.283 | 2351.318 | 2770.589 | 2594.862 | 1416.275 | 1435.43  | 1362.217 | -0.17937 | 0.313005 | 0.847594  | 1.73E-08   | -0.01119 | 0.981084 |
| AT4G17098 | AT4G17098   | 1.188904  | 0        | 0        | 3.826923 | 2.474493  | 3.974804 | 3.987363 | 4.446517 | 1.07889  | 6.833722 | 1.919071 | 7.982004 | 0.419736 | 0.567574 | 0.609684  | 0.410446   | 0.88824  | 0.104466 |
| AT4G17100 | AT4G17100   | 30.9115   | 33.90067 | 21.89012 | 41.24156 | 28.48609  | 27.91154 | 40.01866 | 46.39227 | 44.90732 | 24.94793 | 26.60668 | 31.0772  | 0.199726 | 0.605365 | 0.569494  | 0.107521   | -0.0523  | 0.953945 |
| AT4G17140 | AT4G17140   | 89.5.2447 | 710.1299 | 548.5407 | 331.1697 | 284.8609  | 479.4804 | 838.6132 | 1152.254 | 72.3627  | 546.9353 | 570.7133 | 620.508  | -0.943   | 4.95E-05 | 0.321927  | 0.236949   | -0.29816 | 0.477718 |
| AT4G17150 | AT4G17150   | 317.4374  | 271.2054 | 244.6543 | 388.4955 | 382.2436  | 423.6573 | 392.1828 | 389.4793 | 351.4486 | 298.4156 | 300.6555 | 297.3052 | 0.506052 | 0.000293 | 0.433903  | 0.003205</ |          |          |

|           |           |          |          |          |           |          |          |          |          |          |          |          |          |          |          |          |          |          |          |
|-----------|-----------|----------|----------|----------|-----------|----------|----------|----------|----------|----------|----------|----------|----------|----------|----------|----------|----------|----------|----------|
| AT4G17616 | AT4G17616 | 136.724  | 119.5445 | 113.3136 | 114.2391  | 126.5312 | 139.5577 | 142.2886 | 132.7035 | 86.88589 | 139.1327 | 110.4177 | 151.2424 | 0.029134 | 0.925071 | -0.03163 | 0.922842 | 0.116159 | 0.815889 |
| AT4G17620 | AT4G17620 | 170.0133 | 160.5821 | 200.8741 | 224.3541  | 200.7276 | 209.3366 | 153.8495 | 167.2279 | 209.8929 | 141.0517 | 168.9524 | 170.9246 | 0.248283 | 0.209675 | -0.007   | 0.979164 | -0.14917 | 0.687982 |
| AT4G17640 | CKB2      | 539.7624 | 640.5443 | 678.5938 | 751.0088  | 792.9733 | 749.6233 | 720.3358 | 782.1952 | 659.1232 | 624.6577 | 673.149  | 639.1543 | 0.302101 | 0.023738 | 0.212119 | 0.149382 | 0.059652 | 0.84464  |
| AT4G17650 | AT4G17650 | 104.6235 | 130.25   | 144.2173 | 191.7732  | 176.2163 | 202.3587 | 215.2114 | 190.9635 | 152.2944 | 123.7801 | 89.13238 | 105.6625 | 0.575581 | 0.005284 | 0.548597 | 0.010922 | -0.23022 | 0.563723 |
| AT4G17660 | AT4G17660 | 3.566712 | 5.352738 | 1.287654 | 44.12847  | 51.67245 | 58.81361 | 36.46144 | 25.89336 | 48.8123  | 2.878607 | 2.660668 | 2.078113 | 3.198225 | 2.29E-13 | 2.75156  | 8.41E-10 | -0.25273 | 0.838821 |
| AT4G17670 | AT4G17670 | 66.57862 | 69.5856  | 63.0956  | 37.04223  | 423.3166 | 272.1375 | 385.0684 | 274.038  | 385.6112 | 69.08657 | 70.5077  | 58.01077 | 2.348018 | 3.34E-27 | 2.303657 | 6.05E-26 | -0.01628 | 0.983524 |
| AT4G17680 | AT4G17680 | 23.77808 | 24.97944 | 28.3284  | 11.13522  | 9.937009 | 15.94945 | 7.114428 | 6.47334  | 10.73871 | 33.58375 | 34.58868 | 16.5745  | -0.96967 | 0.017143 | -1.41724 | 0.001042 | 0.12376  | 0.894009 |
| AT4G17690 | PERA1     | 0        | 0        | 0        | 0         | 0        | 0        | 0        | 0        | 0        | 0        | 0        | 0        | #N/A     | #N/A     | #N/A     | #N/A     | #N/A     | #N/A     |
| AT4G17695 | KAN3      | 41.61164 | 53.52738 | 56.65679 | 99.80457  | 106.6572 | 103.6714 | 70.25498 | 77.68008 | 49.78855 | 55.65307 | 58.53469 | 46.61579 | 0.998898 | 2.88E-05 | 0.368053 | 0.210652 | 0.080765 | 0.898417 |
| AT4G17700 | AT4G17700 | 0        | 0        | 0        | 0         | 0        | 0        | 0        | 0        | 0        | 0        | 0        | 0        | 0        | NA       | 0.160764 | NA       | 0        | NA       |
| AT4G17710 | HGD4      | 0        | 0        | 1.287654 | 0.824831  | 1.324935 | 0        | 0        | 0.889303 | 0        | 0        | 1.919071 | 0        | 0.149806 | NA       | 0.089482 | NA       | 0        | NA       |
| AT4G17713 | AT4G17713 | 0        | 0        | 0        | 0         | 0        | 0        | 0        | 0        | 0        | 0        | 0        | 0        | #N/A     | #N/A     | #N/A     | #N/A     | #N/A     | #N/A     |
| AT4G17718 | AT4G17718 | 0        | 0        | 0        | 0         | 0        | 0        | 0        | 0.889303 | 0        | 0        | 1.330334 | 0        | 0        | NA       | 0.141773 | NA       | 0.183636 | NA       |
| AT4G17720 | AT4G17720 | 255.6143 | 290.8321 | 266.5444 | 712.6541  | 719.4395 | 639.9718 | 563.8184 | 575.0483 | 784.9018 | 324.323  | 371.1632 | 267.2639 | 1.325575 | 2.21E-15 | 1.218843 | 5.87E-13 | 0.237277 | 0.462976 |
| AT4G17730 | SY2P3     | 756.1429 | 793.9895 | 885.9062 | 658.2153  | 683.0038 | 683.8328 | 948.8868 | 815.6408 | 932.3149 | 791.6169 | 868.7081 | 719.955  | -0.26491 | 0.044402 | 0.145887 | 0.329852 | -0.03502 | 0.911082 |
| AT4G17740 | CTPA2     | 318.6263 | 387.1814 | 366.9815 | 294.8771  | 276.2489 | 267.1533 | 373.5075 | 343.087  | 334.8524 | 389.5715 | 368.5025 | 399.8599 | -0.34114 | 0.013782 | -0.02172 | 0.911414 | 0.116384 | 0.661914 |
| AT4G17750 | HSFA1A    | 73.71204 | 83.85956 | 66.95803 | 80.08862  | 68.8966  | 88.71883 | 75.5908  | 89.54786 | 47.83605 | 71.00564 | 54.54369 | 74.58527 | 0.081204 | 0.808733 | -0.06814 | 0.854545 | -0.14166 | 0.806773 |
| AT4G17760 | AT4G17760 | 10.70014 | 7.136984 | 20.60247 | 11.96005  | 7.949607 | 8.971567 | 10.67164 | 6.47334  | 5.857476 | 9.595356 | 10.64267 | 12.43088 | -0.34313 | 0.539198 | -0.61402 | 0.28013  | -0.2188  | NA       |
| AT4G17765 | AT4G17765 | 0        | 0        | 0        | 0         | 0        | 0        | 0        | 0        | 0        | 0        | 0        | 0        | #N/A     | #N/A     | #N/A     | #N/A     | #N/A     | #N/A     |
| AT4G17770 | TP55      | 341.2154 | 248.0102 | 235.6407 | 144.7579  | 151.0425 | 139.5577 | 120.9453 | 139.1768 | 129.8407 | 247.5602 | 211.5231 | 254.833  | -0.90635 | 1.74E-07 | -1.06408 | 2.26E-09 | -0.20632 | 0.528884 |
| AT4G17780 | AT4G17780 | 0        | 0        | 0        | 0         | 0        | 0        | 0        | 0        | 0.976246 | 0        | 0        | 0        | 0        | NA       | 0.16673  | NA       | 0        | NA       |
| AT4G17785 | MYB39     | 0        | 0        | 0        | 0.412416  | 0.662467 | 0        | 0        | 0        | 0        | 0        | 0        | 0        | 0.210648 | 0        | 0        | NA       | 0.178505 | NA       |
| AT4G17788 | MIR160B   | 0        | 0        | 0        | 0         | 0.662467 | 1.993682 | 0        | 0        | 0        | 0        | 0        | 0        | 0.403055 | NA       | 0        | NA       | 0        | NA       |
| AT4G17790 | AT4G17790 | 252.0476 | 271.2054 | 288.4346 | 275.906   | 317.9843 | 301.0459 | 259.6766 | 216.8569 | 233.3228 | 279.2249 | 264.7365 | 280.7307 | 0.13682  | 0.413948 | -0.18689 | 0.283216 | 0.025304 | 0.949347 |
| AT4G17800 | AHL23     | 0        | 3.568492 | 0        | 1.649662  | 1.987402 | 0.996841 | 0.289633 | 2.15778  | 1.952492 | 0.99536  | 0        | 2.071813 | 0.243232 | 0.754178 | 0.256064 | 0.751208 | 0.017073 | NA       |
| AT4G17810 | AT4G17810 | 158.1242 | 171.2876 | 197.0111 | 121.6626  | 104.0074 | 101.6778 | 113.8308 | 93.86342 | 146.3469 | 225.4909 | 274.0488 | 159.5296 | -0.65385 | 0.005588 | -0.54843 | 0.028934 | 0.390209 | 0.441758 |
| AT4G17820 | AT4G17820 | 0        | 0        | 0        | 0         | 0.662467 | 0        | 0.889303 | 0        | 0.976246 | 0.99536  | 1.330334 | 0        | 0.079723 | NA       | 0.340491 | NA       | 0.386339 | NA       |
| AT4G17830 | AT4G17830 | 304.3594 | 355.065  | 292.2975 | 490.7745  | 425.9665 | 438.6099 | 398.408  | 440.1871 | 356.3298 | 266.7509 | 208.8624 | 254.833  | 0.510742 | 0.000691 | 0.327843 | 0.054497 | -0.36346 | 0.128597 |
| AT4G17840 | AT4G17840 | 653.8972 | 815.4004 | 722.3741 | 839.6781  | 821.4594 | 853.2957 | 1052.046 | 966.6854 | 653.1086 | 818.4839 | 803.5217 | 831.8329 | 0.196304 | 0.317457 | 0.282553 | 0.149151 | 0.162135 | 0.625893 |
| AT4G17850 | AT4G17850 | 0        | 0        | 0        | 0         | 0        | 0        | 0        | 0        | 0        | 0        | 0        | 0        | #N/A     | #N/A     | #N/A     | #N/A     | #N/A     | #N/A     |
| AT4G17860 | AT4G17860 | 4.755616 | 3.568492 | 10.30123 | 6.598649  | 5.299738 | 8.971567 | 7.114428 | 10.7889  | 4.88123  | 7.676285 | 15.96401 | 9.323159 | 0.057071 | 0.938178 | 0.174634 | 0.813771 | 0.584329 | NA       |
| AT4G17870 | PYR1      | 486.2617 | 488.8834 | 539.5272 | 466.8544  | 538.5859 | 465.5246 | 423.3085 | 368.9804 | 749.7569 | 514.3111 | 550.7583 | 555.2459 | -0.04107 | 0.89348  | 0.024999 | 0.399071 | 0.093356 | 0.858201 |
| AT4G17880 | MYC4      | 539.7624 | 363.9862 | 401.7482 | 147.6448  | 139.7806 | 198.3713 | 147.6244 | 145.6501 | 142.5319 | 365.5831 | 376.4845 | 413.3267 | -1.40969 | 1.98E-15 | -1.54798 | 1.52E-17 | -0.17704 | 0.616471 |
| AT4G17890 | AGD8      | 550.4625 | 565.606  | 547.2531 | 507.7212  | 547.8604 | 499.4172 | 534.4714 | 418.6093 | 372.926  | 648.6461 | 598.6503 | 582.1795 | -0.09502 | 0.599665 | -0.31952 | 0.049732 | 0.136704 | 0.632849 |
| AT4G17895 | UBP20     | 115.3237 | 92.78079 | 103.0123 | 99.80457  | 122.5564 | 109.6525 | 133.3955 | 112.2046 | 105.4346 | 95.95356 | 118.3997 | 111.8779 | 0.076388 | 0.769991 | 0.162609 | 0.525712 | 0.050844 | 0.922598 |
| AT4G17900 | AT4G17900 | 311.4928 | 346.1437 | 319.3383 | 723.3769  | 759.85   | 677.8157 | 799.4388 | 781.1163 | 719.9433 | 262.9128 | 270.0578 | 293.1615 | 1.139966 | 9.7E-23  | 1.227293 | 7.6E-26  | -0.23446 | 0.275882 |
| AT4G17905 | ATL53     | 14.26685 | 24.97944 | 30.9037  | 10.7228   | 11.92441 | 18.93997 | 20.45398 | 17.26224 | 7.809968 | 16.31211 | 11.97301 | 15.5386  | -0.68455 | 0.130733 | -0.52513 | 0.295825 | -0.56393 | 0.458914 |
| AT4G17910 | AT4G17910 | 1.188904 | 0        | 0        | 0.2062078 | 0        | 0.996841 | 0        | 1.07889  | 0.976246 | 0.99536  | 1.330334 | 2.078113 | 0.299865 | 0.668692 | 0.086348 | 0.912108 | 0.438032 | NA       |
| AT4G17915 | AT4G17915 | 123.646  | 119.5445 | 100.437  | 166.2035  | 191.453  | 138.5609 | 131.6169 | 103.5734 | 129.8407 | 108.4275 | 119.7301 | 120.1652 | 0.526061 | 0.009144 | 0.089385 | 0.748006 | 0.017957 | 0.976518 |
| AT4G17914 | AT4G17914 | 2.377808 | 5.352738 | 3.862963 | 1.237247  | 1.987402 | 0        | 0        | 0.976246 | 0.99536  | 1.330334 | 3.10772  | 0        | -0.85024 | 0.212399 | -1.26576 | 0.054885 | -0.55737 | NA       |
| AT4G17915 | AT4G17915 | 13.07794 | 8.92123  | 19.31482 | 18.97112  | 19.87402 | 12.95893 | 16.89677 | 10.7889  | 15.59618 | 12.47396 | 17.29434 | 13.46678 | 0.284278 | 0.566835 | 0.065623 | 0.91461  | 0.013551 | NA       |
| AT4G17920 | ATL29     | 10.70014 | 1.784246 | 3.862963 | 2.474493  | 5.299738 | 6.977885 | 0.889303 | 2.15778  | 0.976246 | 0.995356 | 5.321336 | 3.10772  | -0.17579 | 0.821401 | -1.12578 | 0.092308 | 0.072741 | NA       |
| AT4G17930 | AT4G17930 | 0        | 0        | 0        | 0         | 0        | 0        | 0        | 0        | 0        | 0        | 0        | 0        | #N/A     | #N/A     | #N/A     | #N/A     | #N/A     | #N/A     |
| AT4G17940 | AT4G17940 | 353.1045 | 330.0855 | 342.5161 | 541.0892  | 533.9486 | 487.4551 | 343.2711 | 358.1915 | 669.7048 | 364.6235 | 357.8598 | 324.2387 | 0.586579 | 0.010905 | 0.403253 | 0.108917 | 0.02698  | 0.96566  |
| AT4G17950 | AHL13     | 234.2141 | 214.1095 | 208.6    | 188.0615  | 222.589  | 178.345  | 201.8719 | 211.4624 | 172.9955 | 193.8262 | 202.2108 | 204.0793 | -0.154   | 0.410745 | -0.16455 | 0.410854 | -0.13114 | 0.691846 |
| AT4G17960 | AT4G17960 | 65.38972 | 74.93833 | 70.82098 | 73.82239  | 84.13334 | 71.77254 | 65.80486 | 77.68008 | 78.07968 | 75.80331 | 66.5167  | 68.36363 | 0.126858 | 0.636777 | 0.070803 | 0.821727 | 0.008334 | 0.990348 |
| AT4G17970 | ALMT12    | 33.28931 | 39.25341 | 30.9037  | 16.90904  | 13.24935 | 13.95577 | 23.12189 | 17.26224 | 9.76246  | 57.57214 | 43.90102 | 52.83123 | -1.09493 | 0.001355 | -0.9292  | 0.011876 | 0.567067 | 0.272368 |
| AT4G17975 | AT4G17975 | 0        | 0        | 0        | 0         | 0        | 0        | 0        | 0        | 0        | 0        | 0        | 0        | 0        | NA       | 0        | NA       | 0.172362 | NA       |
| AT4G17980 | anac071   | 0        | 0        | 0        | 0.2062078 | 2.649869 | 0.996841 | 6.225124 | 1.07889  | 1.952492 | 0        | 0        | 0        | 0.886007 | 0.159732 | 1.228768 | 0.048381 | 0        | NA       |
| AT4G17990 | AT4G17990 | 0        | 0        | 0        | 0.412416  | 0.662467 | 0        | 0        | 0        | 0        | 0        | 1.330334 | 0        | 0.213241 | NA       | 0        | NA       | 0.204858 | NA       |
| AT4G17998 | AT4G17998 | 0        | 0        | 0        | 0         | 0        | 0        | 0        | 0        | 0        | 0        | 0        | 0        | #N/A     | #N/A     | #N/A     | #N/A     | #N/A     | #N/A     |
| AT4G18000 | AT4G18000 | 0        | 0        | 0        | 0         | 0        | 0        | 0        | 0        | 0        | 0        | 0        | 0        | #N/A     | #N/A     | #N/A     | #N/A     | #N/A     | #N/A     |
| AT4G18010 | IPSP2     | 191.4135 | 201.6198 | 200.8741 | 603.7764  | 551.8352 | 725.7001 | 641.1878 | 745.5129 | 595.5101 | 178.4736 | 176.9344 | 203.0377 | 1.631293 | 1.33E-26 | 1.707798 | 7.91E-29 | -0.08514 | 0.831662 |
| AT4G18020 | APR82     | 567.1072 | 572.743  | 531.8012 | 499.0228  | 437.2284 | 529.3225 | 398.408  | 406.7415 | 329.9711 | 600.6693 | 481.5809 | 550.0664 | -0.188   | 0.243828 | -0.54981 | 0.000199 | -0.03014 | 0.936504 |
| AT4G18030 | AT4G18030 | 1349.406 | 1231.13  | 1276.065 | 704.4058  | 742.6258 | 876.223  | 652.7488 | 721.7774 | 667.7523 | 1214.772 | 1234.    |          |          |          |          |          |          |          |

|           |            |           |          |          |          |          |          |          |          |          |          |          |          |          |          |          |          |          |          |
|-----------|------------|-----------|----------|----------|----------|----------|----------|----------|----------|----------|----------|----------|----------|----------|----------|----------|----------|----------|----------|
| AT4G18440 | AT4G18440  | 2677.412  | 2528.277 | 2418.215 | 966.7021 | 1089.096 | 1047.68  | 1145.423 | 1119.888 | 929.3862 | 3984.951 | 5498.27  | 2906.754 | -1.26217 | 2.61E-11 | -1.2209  | 1.43E-10 | 0.6819   | 0.005908 |
| AT4G18450 | ERF091     | 0         | 0        | 0        | 0        | 0        | 0        | 0        | 0        | 0        | 0        | 0        | 0        | #N/A     | #N/A     | #N/A     | #N/A     | #N/A     | #N/A     |
| AT4G18460 | AT4G18460  | 52.31177  | 41.03766 | 66.95803 | 57.32576 | 59.62205 | 61.80413 | 57.80473 | 28.05114 | 46.85981 | 71.96517 | 122.3907 | 94.26749 | 0.129084 | 0.730305 | -0.25899 | 0.491057 | 0.77798  | 0.052651 |
| AT4G18465 | AT4G18465  | 105.8125  | 107.0548 | 77.25926 | 144.3455 | 109.3071 | 147.5324 | 147.6244 | 152.1235 | 82.00466 | 117.0633 | 105.0964 | 92.19568 | 0.449416 | 0.101729 | 0.380812 | 0.200503 | 0.114349 | 0.851271 |
| AT4G18470 | SN1I       | 21.40027  | 32.11643 | 29.61605 | 28.45667 | 17.22415 | 25.91786 | 20.45398 | 18.34113 | 16.59618 | 22.06932 | 14.63367 | 22.78994 | -0.16778 | 0.706487 | -0.50875 | 0.234617 | -0.40119 | 0.560065 |
| AT4G18480 | CH1I       | 4138.575  | 4319.66  | 4245.396 | 2770.195 | 2710.816 | 2761.249 | 2936.48  | 2864.453 | 3162.061 | 4030.05  | 3824.71  | 5301.77  | -0.61657 | 2.1E-06  | -0.49702 | 0.000209 | 0.050415 | 0.873315 |
| AT4G18490 | AT4G18490  | 38.04493  | 16.05821 | 33.47901 | 7.42348  | 11.92441 | 9.968408 | 16.00746 | 21.5778  | 6.833722 | 44.13864 | 54.54369 | 32.1131  | -1.42005 | 0.00053  | -0.88952 | 0.045847 | 0.494687 | 0.473656 |
| AT4G18500 | AT4G18500  | 0         | 0        | 1.287654 | 0        | 0        | 0        | 0        | 2.15778  | 0        | 0        | 0        | 0        | -0.2246  | NA       | 0.116327 | NA       | -0.19895 | NA       |
| AT4G18501 | AT4G18501  | 8.3232328 | 1.784246 | 3.862963 | 2.474493 | 5.962205 | 3.987363 | 1.778607 | 3.23667  | 0.976246 | 9.595356 | 7.982004 | 9.323159 | -0.19677 | 0.79209  | -0.78003 | 0.258016 | 0.667286 | NA       |
| AT4G18510 | CLM2       | 0         | 1.784246 | 5.150617 | 1.237247 | 1.324935 | 0        | 1.778607 | 0        | 0.976246 | 0        | 1.330334 | 0        | -0.47626 | 0.489075 | -0.45887 | 0.519176 | -0.7115  | NA       |
| AT4G18520 | PCMP-A2    | 221.1361  | 183.7773 | 160.9568 | 92.7935  | 100.695  | 112.643  | 154.7388 | 179.0957 | 185.4867 | 151.6066 | 133.0334 | 206.1454 | -0.87296 | 1.86E-05 | -0.12397 | 0.645797 | -0.19689 | 0.620366 |
| AT4G18530 | AT4G18530  | 159.3131  | 190.9143 | 190.5728 | 152.5938 | 176.2163 | 161.4882 | 184.9751 | 179.0957 | 169.8668 | 198.6239 | 222.1658 | 205.1095 | -0.13653 | 0.472589 | -0.01157 | 0.96157  | 0.209995 | 0.468439 |
| AT4G18540 | AT4G18540  | 0         | 0        | 0        | 0.412416 | 1.987402 | 0.996841 | 0.889303 | 1.07889  | 2.928738 | 0.959536 | 1.330334 | 1.035907 | 0.54254  | 0.410745 | 0.774913 | 0.231718 | 0.532485 | NA       |
| AT4G18550 | DSFL       | 2.377808  | 3.568492 | 11.58889 | 4.536571 | 5.299738 | 3.987363 | 3.557214 | 2.15778  | 2.928738 | 2.878607 | 7.982004 | 9.323159 | -0.23994 | 0.744077 | -0.65598 | 0.349895 | 0.125501 | NA       |
| AT4G18570 | AT4G18570  | 480.3172  | 449.63   | 450.679  | 217.7554 | 255.0499 | 218.3081 | 220.5473 | 272.9592 | 288.9688 | 495.1204 | 541.4459 | 467.1938 | -0.98463 | 3.01E-12 | -0.8103  | 2.62E-08 | 0.118906 | 0.684666 |
| AT4G18580 | AT4G18580  | 48.74506  | 32.11643 | 36.05432 | 105.166  | 111.957  | 65.79149 | 80.03731 | 67.97007 | 143.5082 | 47.97678 | 49.22236 | 44.54398 | 1.175828 | 0.000212 | 1.205062 | 0.000195 | 0.232964 | 0.737277 |
| AT4G18590 | RPA3B      | 158.1242  | 203.404  | 175.121  | 198.3719 | 236.5008 | 189.3997 | 177.8607 | 185.5691 | 308.4937 | 232.2076 | 215.5141 | 218.5763 | 0.21784  | 0.39682  | 0.319203 | 0.214601 | 0.308309 | 0.427271 |
| AT4G18593 | AT4G18593  | 91.5456   | 99.91778 | 114.6012 | 178.1635 | 178.2037 | 141.5514 | 118.2774 | 186.463  | 119.942  | 121.0604 | 119.1293 | 0.686831 | 0.001779 | 0.490993 | 0.052716 | 0.225149 | 0.597722 |          |
| AT4G18596 | F28I12.250 | 3.566712  | 0        | 0        | 0        | 0.824831 | 0        | 0.996841 | 0        | 1.07889  | 0.976246 | 0.959536 | 0        | -0.27881 | NA       | -0.23852 | NA       | -0.3956  | NA       |
| AT4G18600 | WAVE5      | 369.7491  | 289.0479 | 239.5037 | 108.8777 | 108.6446 | 141.5514 | 169.857  | 183.4113 | 119.942  | 253.3174 | 244.7815 | 219.6122 | -1.2942  | 2.99E-10 | -0.90138 | 2.48E-05 | -0.31621 | 0.380077 |
| AT4G18610 | LSH9       | 21.40027  | 1.784246 | 11.58889 | 2.474493 | 1.987402 | 1.993682 | 1.778607 | 1.07889  | 1.952492 | 8.635821 | 10.64267 | 10.35907 | -1.73362 | 0.002259 | -1.86188 | 0.001605 | -0.22723 | NA       |
| AT4G18620 | PVL13      | 0         | 0        | 0        | 0        | 0        | 0        | 0        | 0        | 0        | 0        | 0        | 0        | #N/A     | #N/A     | #N/A     | #N/A     | #N/A     | #N/A     |
| AT4G18630 | AT4G18630  | 29.7226   | 23.1952  | 33.47901 | 31.756   | 26.49869 | 21.9305  | 40.90796 | 26.97225 | 20.50117 | 25.90746 | 22.61568 | 24.86176 | -0.08833 | 0.845368 | 0.024614 | 0.961547 | -0.2237  | 0.768141 |
| AT4G18640 | MRH1       | 170.0133  | 105.2705 | 145.5049 | 31.34358 | 33.78583 | 41.86731 | 40.90796 | 34.52448 | 23.4299  | 142.9708 | 110.4177 | 131.5601 | -1.92485 | 7.02E-16 | -1.99418 | 2.24E-15 | -0.12971 | 0.805161 |
| AT4G18650 | AT4G18650  | 0         | 0        | 0        | 0        | 0        | 0        | 0        | 0        | 0        | 0        | 0        | 0        | #N/A     | #N/A     | #N/A     | #N/A     | #N/A     | #N/A     |
| AT4G18660 | AT4G18660  | 1.188904  | 0        | 0        | 0.412416 | 0        | 0        | 0        | 0        | 0        | 0        | 0        | 0        | -0.10956 | NA       | -0.19067 | NA       | -0.18704 | NA       |
| AT4G18670 | LXR5       | 519.551   | 296.1848 | 249.8049 | 111.3522 | 88.77061 | 116.6304 | 114.7201 | 113.2834 | 82.00466 | 237.0053 | 235.4691 | 196.8222 | -1.67667 | 7.15E-12 | -1.70217 | 7.47E-12 | -0.64655 | 0.072383 |
| AT4G18680 | AT4G18680  | 0         | 1.784246 | 0        | 0.412416 | 0        | 0        | 0        | 0.889303 | 0        | 0        | 0        | 0        | -0.17556 | NA       | -0.08634 | NA       | -0.25627 | NA       |
| AT4G18690 | AT4G18690  | 1.188904  | 0        | 0        | 0        | 0        | 0        | 0        | 0        | 1.07889  | 0        | 0        | 0        | -0.2127  | NA       | -0.02202 | NA       | -0.1938  | NA       |
| AT4G18692 | AT4G18692  | 4.755616  | 5.352738 | 1.287654 | 7.011065 | 1.987402 | 2.990522 | 1.778607 | 3.23667  | 2.928738 | 0        | 3.991002 | 2.071813 | 0.13846  | 0.865412 | -0.27887 | 0.736402 | -0.49951 | NA       |
| AT4G18700 | CIPK12     | 930.9118  | 968.8456 | 893.6321 | 579.4439 | 608.145  | 755.6053 | 640.2985 | 682.9373 | 681.4197 | 747.4783 | 823.4767 | 838.0484 | -0.52252 | 5.37E-05 | -0.47249 | 0.000405 | -0.21083 | 0.332189 |
| AT4G18710 | ASK7       | 1810.701  | 1568.352 | 1512.994 | 865.2479 | 925.4668 | 1112.474 | 1148.98  | 115.759  | 924.505  | 1280.98  | 1434.1   | 1339.427 | -0.74533 | 1.82E-07 | -0.58234 | 7.99E-05 | -0.26818 | 0.25381  |
| AT4G18720 | AT4G18720  | 0         | 0        | 0        | 0        | 0        | 0        | 0        | 0        | 0        | 0        | 1.330334 | 0        | 0        | NA       | 0        | NA       | 0.172362 | NA       |
| AT4G18725 | AT4G18725  | 0         | 0        | 0        | 0        | 0        | 0        | 0        | 0        | 0        | 0        | 0        | 0        | #N/A     | #N/A     | #N/A     | #N/A     | #N/A     | #N/A     |
| AT4G18730 | RPL11B     | 1053.369  | 1068.763 | 1158.889 | 1316.431 | 1377.269 | 1079.579 | 917.7612 | 831.8241 | 1520.991 | 1121.697 | 1326.343 | 1325.96  | 0.196431 | 0.421021 | -0.00446 | 0.988234 | 0.195502 | 0.625212 |
| AT4G18740 | AT4G18740  | 300.7927  | 390.7499 | 345.0914 | 183.1125 | 215.3019 | 199.3682 | 236.5547 | 197.4369 | 272.3726 | 415.4789 | 461.6259 | 476.517  | -0.77657 | 1.72E-06 | -0.53484 | 0.001931 | 0.383928 | 0.108283 |
| AT4G18750 | DOT4       | 43.98945  | 32.11643 | 28.3284  | 35.88015 | 33.78583 | 33.89259 | 50.6903  | 65.81229 | 38.07359 | 25.90746 | 30.59768 | 36.25673 | -0.02041 | 0.962627 | 0.155889 | 0.136029 | -0.17216 | 0.808127 |
| AT4G18760 | ATRPLP51   | 146.2352  | 71.36984 | 83.69753 | 43.30364 | 52.33491 | 42.86415 | 56.02612 | 48.55005 | 64.43224 | 85.52006 | 78.4897  | 70.44164 | -1.08117 | 5.12E-05 | -0.80664 | 0.004517 | -0.37904 | 0.417269 |
| AT4G18770 | MYB98      | 0         | 1.784246 | 1.287654 | 0        | 0        | 0.996841 | 0        | 1.778607 | 0        | 0.959536 | 0        | 0.701813 | -0.3669  | NA       | -0.14442 | NA       | 0.048624 | NA       |
| AT4G18780 | CE5A8      | 84.41218  | 58.88012 | 66.95803 | 23.50769 | 14.57428 | 27.91154 | 24.01119 | 33.44559 | 15.61994 | 74.84378 | 51.88302 | 61.11849 | -1.5808  | 1.76E-07 | -1.43132 | 6.32E-06 | -0.15291 | 0.820327 |
| AT4G18790 | NRAMP5     | 0         | 0        | 0        | 0        | 0        | 0        | 0        | 0        | 0        | 0        | 0        | 0        | #N/A     | #N/A     | #N/A     | #N/A     | #N/A     | #N/A     |
| AT4G18800 | RABA1D     | 112.9459  | 92.78079 | 86.27284 | 137.3344 | 141.1055 | 149.5261 | 137.842  | 132.7035 | 216.7266 | 119.942  | 114.4087 | 113.9497 | 0.523388 | 0.023936 | 0.708361 | 0.002143 | 0.239492 | 0.580037 |
| AT4G18810 | AT4G18810  | 571.8628  | 670.8765 | 535.6642 | 670.1753 | 556.4725 | 710.7475 | 924.8756 | 803.773  | 682.396  | 871.2583 | 820.8161 | 840.1202 | 0.123424 | 0.51391  | 0.435587 | 0.008349 | 0.505019 | 0.013079 |
| AT4G18815 | AT4G18815  | 0         | 0        | 0        | 0        | 0        | 0        | 0        | 0        | 0        | 0        | 0        | 0        | #N/A     | #N/A     | #N/A     | #N/A     | #N/A     | #N/A     |
| AT4G18820 | F28A21.230 | 342.4043  | 351.4965 | 309.037  | 178.5759 | 166.9418 | 237.2481 | 232.1082 | 265.4069 | 185.4867 | 297.456  | 283.3611 | 337.7055 | -0.77441 | 0.00002  | -0.54122 | 0.005102 | -0.12081 | 0.756897 |
| AT4G18823 | AT4G18823  | 0         | 1.784246 | 0        | 0.412416 | 0        | 0.996841 | 0        | 0        | 0.959536 | 0        | 0        | 0        | -0.02173 | NA       | -0.28675 | NA       | -0.07784 | NA       |
| AT4G18830 | OPF5       | 61.82301  | 73.15409 | 81.12222 | 61.44992 | 72.20893 | 75.7599  | 70.25498 | 87.39009 | 91.76712 | 79.64146 | 109.0874 | 90.12387 | -0.05512 | 0.859292 | 0.199156 | 0.496286 | 0.348299 | 0.380712 |
| AT4G18840 | PCMP-E101  | 20.21137  | 23.1952  | 19.31482 | 20.62078 | 13.91181 | 16.94629 | 16.89677 | 18.34113 | 19.52492 | 20.15025 | 15.96401 | 31.0772  | -0.22966 | 0.61844  | -0.1666  | 0.750912 | 0.114127 | 0.90189  |
| AT4G18850 | AT4G18850  | 0         | 0        | 0        | 0        | 0        | 0        | 0        | 0        | 0        | 0        | 0        | 0        | #N/A     | #N/A     | #N/A     | #N/A     | #N/A     | #N/A     |
| AT4G18860 | AT4G18860  | 0         | 0        | 0        | 0        | 0        | 0        | 0        | 0        | 0        | 0        | 0        | 0        | #N/A     | #N/A     | #N/A     | #N/A     | #N/A     | #N/A     |
| AT4G18870 | AT4G18870  | 0         | 0        | 1.287654 | 3.71174  | 1.324935 | 2.990522 | 3.557214 | 4.31556  | 6.833722 | 0        | 0        | 0        | 0.900135 | 0.176693 | 1.428506 | 0.027284 | -0.31822 | NA       |
| AT4G18880 | HSFA4A     | 261.5589  | 221.2465 | 248.5173 | 618.6234 | 721.4269 | 850.3052 | 1048.489 | 882.5319 | 100.8375 | 172.7164 | 224.8264 | 181.2836 | 1.542633 | 3.84E-22 | 1.916379 | 8.43E-34 | -0.34137 | 0.228165 |
| AT4G18890 | BEH3       | 67.76572  | 64.23286 | 79.83457 | 154.2434 | 153.6924 | 152.5166 | 164.5211 | 157.5179 | 206.9642 | 60.45074 | 74.4987  | 54.90305 | 1.080769 | 6.88E-08 | 1.275894 | 1.95E-10 | -0.1724  | 0.711679 |
| AT4G18900 | AT4G18900  | 2.377808  | 1.784246 | 1.287654 | 0.824831 | 0.662467 | 0.996841 | 0.889303 | 0        | 0        | 0.959536 | 2.660668 | 0        | -0.42906 | 0.544394 | -0.70821 | 0.291009 | -0.2626  | NA       |
| AT4G18905 | AT4G18905  | 291.2815  | 260.4999 | 257.5309 | 274.2564 | 254.3874 | 269.147  | 269.459  | 275.1169 | 243.0853 | 21       |          |          |          |          |          |          |          |          |





|           |            |          |          |           |          |          |          |          |          |          |          |          |          |          |          |          |          |          |          |
|-----------|------------|----------|----------|-----------|----------|----------|----------|----------|----------|----------|----------|----------|----------|----------|----------|----------|----------|----------|----------|
| AT4G21210 | RP1        | 1394.584 | 1605.821 | 1514.282  | 992.2719 | 1099.696 | 936.0335 | 1620.311 | 1544.97  | 2356.658 | 1588.991 | 1597.731 | 1678.169 | -0.56427 | 0.000704 | 0.286101 | 0.124363 | 0.106602 | 0.76241  |
| AT4G21213 | AT4G21213  | 0        | 0        | 0         | 0        | 0        | 0        | 0        | 0        | 0        | 0        | 0        | 0        | 0        | NA       | 0        | NA       | 0.172362 | 0        |
| AT4G21215 | AT4G21215  | 166.466  | 226.5992 | 191.8605  | 87.01969 | 104.6698 | 99.68408 | 141.3993 | 106.8101 | 110.3158 | 118.0229 | 131.7031 | 136.7397 | -0.97808 | 1.69E-07 | -0.67394 | 0.000676 | -0.57487 | 0.027183 |
| AT4G21216 | AT4G21216  | 0        | 0        | 0         | 0        | 0        | 0        | 0        | 0        | 0        | 0        | 0        | 0        | #N/A     | #N/A     | #N/A     | #N/A     | #N/A     | #N/A     |
| AT4G21220 | LPX02      | 11.88904 | 7.136984 | 18.02716  | 24.74493 | 25.17376 | 17.94313 | 17.78607 | 28.31113 | 21.10978 | 25.27635 | 12.43088 | 0.733278 | 0.100113 | 0.560088 | 0.260333 | 0.515038 | 0.509135 |          |
| AT4G21230 | CRK27      | 3.566712 | 8.92123  | 15.150617 | 17.73387 | 27.16116 | 22.92734 | 14.22886 | 15.10446 | 15.61994 | 3.881813 | 3.991002 | 4.143626 | 1.669294 | 0.000322 | 1.12839  | 0.028819 | -0.34999 | NA       |
| AT4G21240 | AT4G21240  | 0        | 0        | 0         | 0        | 0        | 0.996841 | 0        | 0        | 0        | 0        | 0        | 0        | 0.15625  | NA       | 0        | NA       | 0        | NA       |
| AT4G21250 | AT4G21250  | 0        | 1.784246 | 2.575309  | 0.412416 | 0        | 0        | 0.889303 | 0        | 0        | 0        | 0        | 0        | -0.60984 | NA       | -0.48504 | NA       | -0.45529 | NA       |
| AT4G21260 | AT4G21260  | 0        | 0        | 0         | 0        | 0        | 0        | 0        | 0        | 0        | 0        | 0        | 0        | #N/A     | #N/A     | #N/A     | #N/A     | #N/A     | #N/A     |
| AT4G21270 | ATK1       | 135.535  | 83.85956 | 88.84815  | 101.0418 | 84.13334 | 81.74094 | 87.15174 | 90.62675 | 59.55101 | 130.4968 | 102.4357 | 109.8061 | -0.20327 | 0.480454 | -0.37519 | 0.188542 | 0.138738 | 0.794035 |
| AT4G21280 | PSBQ1      | 11005.68 | 12735.95 | 11917.24  | 5730.102 | 5793.939 | 4744.962 | 6242.91  | 5837.873 | 8501.15  | 13416.23 | 15518.35 | 13194.34 | -1.11172 | 0.48E-13 | -0.77875 | 8.26E-07 | 0.236398 | 0.389804 |
| AT4G21300 | PCMP-E36   | 46.36725 | 35.68492 | 38.62963  | 17.73387 | 20.53649 | 35.88627 | 28.45771 | 30.20892 | 18.54867 | 34.54328 | 34.58868 | 30.04129 | -0.71213 | 0.039862 | -0.60236 | 0.112404 | -0.27128 | 0.685893 |
| AT4G21310 | AT4G21310  | 32.10041 | 12.48972 | 25.75309  | 14.02213 | 25.17376 | 13.95577 | 16.89677 | 6.83112  | 13.66744 | 23.98839 | 21.28534 | 22.78994 | -0.39052 | 0.396051 | -0.75305 | 0.103648 | -0.07095 | 0.948017 |
| AT4G21320 | HSA32      | 24.96698 | 21.41095 | 30.9037   | 16.08421 | 25.17376 | 30.90206 | 24.01119 | 25.89336 | 36.1211  | 36.46235 | 34.58868 | 30.04129 | -0.15306 | 0.732249 | 0.126928 | 0.19623  | 0.342227 | 0.607752 |
| AT4G21323 | AT4G21323  | 4.755616 | 10.70548 | 15.45185  | 70.11065 | 3.974804 | 9.968408 | 4.466517 | 4.31556  | 4.88123  | 17.27164 | 7.982004 | 13.46678 | -0.45733 | 0.443148 | -0.86115 | 0.150791 | 0.308004 | NA       |
| AT4G21326 | ATSBT3.12  | 225.8917 | 205.1883 | 236.9284  | 130.3233 | 110.632  | 127.5956 | 122.7239 | 140.2557 | 82.98091 | 177.5141 | 164.9614 | 222.7199 | -0.83587 | 0.000034 | -0.92609 | 7.65E-06 | -0.23418 | 0.534845 |
| AT4G21330 | DYT1       | 0        | 3.568492 | 1.287654  | 0        | 0        | 0        | 0        | 0        | 0        | 0        | 0        | 0        | -0.7478  | NA       | -0.70114 | NA       | -0.47784 | NA       |
| AT4G21340 | BHLH103    | 0        | 0        | 0         | 0        | 0        | 0        | 0        | 0        | 0        | 0        | 0        | 0        | #N/A     | #N/A     | #N/A     | #N/A     | #N/A     | #N/A     |
| AT4G21350 | PUB8       | 141.4796 | 192.6986 | 132.6284  | 125.3743 | 122.5564 | 106.662  | 130.7276 | 134.8612 | 150.3419 | 130.4968 | 131.7031 | 102.5547 | -0.36322 | 0.081108 | -0.14734 | 0.555782 | -0.33399 | 0.309787 |
| AT4G21360 | AT4G21360  | 0        | 0        | 0         | 0        | 0        | 0        | 0        | 0        | 0        | 0        | 0        | 0        | 0        | NA       | 0        | NA       | 0.172362 | NA       |
| AT4G21362 | MIR867A    | 0        | 0        | 0         | 0        | 0        | 0        | 0        | 0        | 0        | 0        | 0        | 0        | #N/A     | #N/A     | #N/A     | #N/A     | #N/A     | #N/A     |
| AT4G21363 | AT4G21363  | 0        | 0        | 0         | 0        | 0        | 0        | 0.889303 | 0        | 0        | 0        | 0        | 0        | 0        | NA       | 0.141773 | NA       | 0.183636 | NA       |
| AT4G21366 | AT4G21366  | 0        | 0        | 0         | 0        | 0        | 0        | 0        | 0        | 0        | 0        | 0        | 0        | #N/A     | #N/A     | #N/A     | #N/A     | #N/A     | #N/A     |
| AT4G21370 | PSEUDO5RKA | 0        | 0        | 0         | 0.412416 | 0        | 0        | 0.889303 | 0        | 0.976246 | 0        | 0        | 0        | 0.074085 | NA       | 0.330313 | NA       | 0        | NA       |
| AT4G21380 | S018       | 317.4374 | 264.0684 | 276.8457  | 395.5065 | 421.9917 | 421.6636 | 266.791  | 242.7502 | 182.558  | 162.1615 | 235.4691 | 187.4991 | 0.514494 | 0.005387 | -0.30612 | 0.147046 | -0.55057 | 0.02878  |
| AT4G21390 | B120       | 13.07794 | 21.41095 | 9.01358   | 28.04426 | 27.82367 | 37.87995 | 83.59453 | 99.25787 | 88.83839 | 6.838281 | 6.65167  | 9.323159 | 1.015773 | 0.004493 | 2.509245 | 7.64E-15 | -0.61613 | 0.379634 |
| AT4G21400 | CRK28      | 165.2576 | 157.0137 | 181.5593  | 173.627  | 185.4908 | 205.3492 | 196.5361 | 180.1746 | 176.7005 | 101.7108 | 115.7391 | 125.3447 | 0.14879  | 0.045494 | 0.130397 | 0.541046 | -0.55002 | 0.017934 |
| AT4G21410 | CRK29      | 165.2576 | 187.3458 | 189.2852  | 118.7757 | 96.72022 | 131.583  | 136.6034 | 170.4646 | 108.3633 | 158.3234 | 176.9344 | 133.6319 | -0.62663 | 0.002995 | -0.37414 | 0.111672 | -0.20384 | 0.610712 |
| AT4G21420 | AT4G21420  | 11.88904 | 3.568492 | 9.01358   | 6.98649  | 8.612075 | 5.981045 | 6.252124 | 3.23667  | 7.809968 | 12.47396 | 5.321336 | 6.215439 | -0.19624 | 0.771    | -0.40982 | 0.54187  | -0.0378  | NA       |
| AT4G21430 | B160       | 173.58   | 185.5616 | 144.2173  | 119.1881 | 127.1937 | 144.5419 | 150.2923 | 161.8335 | 118.1258 | 152.5662 | 154.3187 | 169.8887 | -0.36117 | 0.066588 | -0.2165  | 0.336916 | -0.06982 | 0.876014 |
| AT4G21437 | AT4G21437  | 0        | 0        | 0         | 0        | 0        | 0        | 0        | 0        | 0        | 0        | 0        | 0        | #N/A     | #N/A     | #N/A     | #N/A     | #N/A     | #N/A     |
| AT4G21440 | ATMYB102   | 8.322328 | 12.48972 | 12.87654  | 12.78488 | 9.937009 | 8.971567 | 27.56841 | 8.63112  | 9.76246  | 16.31211 | 21.28534 | 15.5386  | -0.05155 | 0.938101 | 0.397324 | 0.497095 | 0.546493 | NA       |
| AT4G21445 | AT4G21445  | 131.9683 | 142.7397 | 149.3679  | 154.6558 | 153.6924 | 130.5861 | 172.5249 | 213.6022 | 159.2585 | 196.7048 | 254.0938 | 180.2477 | 0.050335 | 0.885191 | 0.777831 | 0.002955 | 0.544187 | 0.158961 |
| AT4G21450 | PVA42      | 695.5088 | 793.9895 | 762.2914  | 1011.243 | 1075.184 | 994.8471 | 1104.515 | 1102.157 | 1132.445 | 134.0448 | 663.8367 | 707.5242 | 0.452093 | 3.08E-05 | 0.528948 | 1.09E-06 | -0.09164 | 0.685929 |
| AT4G21460 | AT4G21460  | 225.8917 | 248.0102 | 251.0926  | 212.394  | 245.1129 | 214.3208 | 216.99   | 215.778  | 195.2492 | 271.5486 | 290.0128 | 308.7001 | -0.10608 | 0.551312 | -0.20142 | 0.25344  | 0.261819 | 0.274581 |
| AT4G21470 | FHY        | 219.9472 | 219.4623 | 229.2025  | 290.3406 | 293.473  | 305.0333 | 339.7139 | 275.1169 | 246.9902 | 279.2249 | 200.8804 | 276.587  | 0.400092 | 0.028822 | 0.359495 | 0.064741 | 0.180278 | 0.595343 |
| AT4G21480 | STP12      | 27.34479 | 28.54794 | 26.60247  | 12.37247 | 11.92441 | 12.95893 | 14.22886 | 14.02557 | 9.76246  | 24.94793 | 18.62468 | 13.46678 | -0.02382 | 0.018975 | -0.88493 | 0.038062 | -0.36414 | 0.621548 |
| AT4G21490 | NDB3       | 0        | 1.784246 | 2.575309  | 0.412416 | 0.662467 | 0        | 1.778607 | 0        | 0        | 2.878607 | 2.660668 | 0        | -0.30767 | 0.667285 | -0.32521 | 0.654222 | 0.155268 | NA       |
| AT4G21500 | AT4G21500  | 19.02246 | 10.70548 | 21.89012  | 14.43455 | 14.57428 | 9.968408 | 13.33955 | 17.26224 | 23.4299  | 12.47396 | 21.28534 | 13.46678 | -0.35949 | 0.457105 | 0.026838 | 0.964288 | -0.16329 | NA       |
| AT4G21510 | SKIP27     | 34.47821 | 66.0174  | 64.35556  | 49.48987 | 52.99738 | 54.82624 | 86.26244 | 78.75897 | 91.76712 | 35.50282 | 50.55269 | 48.68761 | 0.119466 | 0.723932 | 0.807577 | 0.002629 | -0.09518 | 0.889096 |
| AT4G21520 | AT4G21520  | 72.52314 | 58.88012 | 66.95803  | 112.5895 | 111.957  | 105.6651 | 89.9564  | 81.99564 | 71.76914 | 76.76285 | 90.46271 | 54.90305 | 0.70366  | 0.001819 | 0.294077 | 0.282874 | 0.133697 | 0.794565 |
| AT4G21530 | APC4       | 83.22328 | 66.0171  | 92.71111  | 64.33683 | 61.60946 | 55.82308 | 80.92662 | 57.18117 | 62.47974 | 77.72239 | 63.85603 | 78.7289  | -0.40091 | 0.107426 | -0.2665  | 0.34826  | -0.13553 | 0.791991 |
| AT4G21534 | SPHK2      | 85.60108 | 123.113  | 96.57408  | 157.5427 | 145.0803 | 206.346  | 177.8607 | 181.2535 | 145.4607 | 83.4796  | 102.4357 | 45.57989 | 0.708994 | 0.007267 | 0.702349 | 0.010104 | -0.37779 | 0.420501 |
| AT4G21540 | SPHK1      | 375.6936 | 326.517  | 301.3111  | 333.2318 | 378.9313 | 366.8371 | 390.4042 | 374.3748 | 408.0748 | 308.9705 | 325.9318 | 337.7055 | 0.097081 | 0.560556 | 0.219808 | 0.160595 | -0.04805 | 0.886807 |
| AT4G21550 | VAL3       | 41.61164 | 49.95889 | 29.61605  | 23.50769 | 23.84882 | 19.93682 | 43.57587 | 24.81447 | 16.59618 | 51.81492 | 67.84703 | 49.72351 | -0.75309 | 0.035245 | -0.44249 | 0.272623 | 0.458029 | 0.43165  |
| AT4G21560 | VP52-1     | 234.2141 | 297.9691 | 293.5852  | 299.0013 | 352.4326 | 341.9164 | 373.5054 | 388.4004 | 386.5934 | 238.9244 | 268.7275 | 253.7971 | 0.264546 | 0.094402 | 0.475215 | 0.001787 | -0.11173 | 0.721885 |
| AT4G21570 | AT4G21570  | 496.9618 | 542.4108 | 543.3901  | 687.0843 | 814.8347 | 711.7443 | 808.3769 | 729.3296 | 775.1393 | 582.4331 | 631.9086 | 542.815  | 0.479929 | 0.000123 | 0.543629 | 1.53E-05 | 0.148662 | 0.528954 |
| AT4G21580 | AT4G21580  | 294.8482 | 344.3595 | 345.0914  | 640.4814 | 694.9282 | 639.9718 | 654.4167 | 606.3361 | 719.4933 | 364.6235 | 333.9138 | 357.3878 | 0.997522 | 8.31E-16 | 1.001973 | 1.24E-15 | 0.105721 | 0.703509 |
| AT4G21585 | END04      | 46.36725 | 49.95889 | 75.97161  | 43.71605 | 60.28452 | 56.81229 | 68.47637 | 65.81229 | 61.5035  | 67.16749 | 81.15037 | 54.90305 | -0.11705 | 0.732833 | 1.70054  | 0.62834  | 0.211737 | 0.697482 |
| AT4G21590 | END03      | 15.45575 | 16.05821 | 14.1642   | 8.248311 | 7.949607 | 2.990522 | 10.67164 | 7.55223  | 5.87476  | 24.94793 | 38.57969 | 16.5745  | -0.96867 | 0.04377  | -0.74524 | 0.160799 | 0.709551 | NA       |
| AT4G21595 | MIR169G    | 0        | 0        | 0         | 0        | 0        | 0        | 0        | 0        | 0        | 0        | 0        | 0        | 0        | NA       | 0        | NA       | 0.172362 | NA       |
| AT4G21600 | END05      | 1.188904 | 3.568492 | 1.287654  | 6.986499 | 9.274542 | 0        | 4.31556  | 2.928738 | 2.878607 | 0        | 0        | 2.071813 | 0.772912 | 0.262035 | 0.104994 | 0.904961 | -0.07186 | NA       |
| AT4G21605 | AT4G21605  | 0        | 0        | 0         | 0        | 1.324935 | 0.996841 | 1.778607 | 0        | 0        | 0.959536 | 0        | 0        | 0.344503 | NA       | 0.278703 | NA       | 0.148919 | NA       |
| AT4G21610 | L0L2       | 39.23383 | 37.46917 | 50.21852  | 73.82239 | 97.38269 | 62.80097 | 59.58333 | 45.31338 | 64.43224 | 42.21957 | 37.24935 | 31.0772  | 0.839132 | 0.002684 | 0.387583 | 0.245331 | -0.19315 | 0.760935 |
| AT4G21620 | AT4G21620  | 192.6024 | 167.7191 | 154.5185  | 319.2077 |          |          |          |          |          |          |          |          |          |          |          |          |          |          |

|           |           |          |          |          |          |          |          |          |          |          |          |          |          |          |          |          |          |          |          |
|-----------|-----------|----------|----------|----------|----------|----------|----------|----------|----------|----------|----------|----------|----------|----------|----------|----------|----------|----------|----------|
| AT4G22060 | AT4G22060 | 1.188904 | 0        | 0        | 0        | 0        | 0        | 0        | 0        | 0.976246 | 0        | 0        | 0        | -0.21061 | NA       | -0.03092 | NA       | -0.19245 | NA       |
| AT4G22065 | AT4G22065 | 0        | 0        | 0        | 0        | 0        | 0        | 0        | 0        | 0        | 0        | 0        | 0        | #N/A     | #N/A     | #N/A     | #N/A     | #N/A     | #N/A     |
| AT4G22066 | AT4G22066 | 0        | 0        | 0        | 0        | 0        | 0        | 0        | 0        | 0        | 0        | 0        | 0        | #N/A     | #N/A     | #N/A     | #N/A     | #N/A     | #N/A     |
| AT4G22070 | WRKY31    | 0        | 0        | 1.287654 | 4.536571 | 3.974804 | 7.974726 | 7.114428 | 11.86779 | 6.833722 | 0        | 2.660668 | 0        | 1.445361 | 0.020328 | 1.950174 | 0.001482 | 0.052407 | NA       |
| AT4G22080 | RHS14     | 2.377808 | 7.136984 | 0        | 0.824831 | 0        | 0        | 0.889303 | 0        | 0        | 7.676285 | 5.321336 | 10.35907 | -1.14233 | 0.08178  | -1.02975 | 0.133596 | 1.003212 | NA       |
| AT4G22090 | AT4G22090 | 0        | 0        | 0        | 0        | 0        | 0        | 0        | 0        | 0        | 0.959536 | 0        | 0        | 0        | 0        | 0        | 0        | 0.171512 | NA       |
| AT4G22100 | BGLU3     | 0        | 0        | 0        | 0        | 1.324935 | 0        | 0        | 0        | 0        | 0.959536 | 0        | 1.035907 | 0.222719 | NA       | 0        | NA       | 0.320835 | NA       |
| AT4G22105 | SCRL26    | 0        | 0        | 0        | 0        | 0        | 0        | 0        | 0        | 0        | 0        | 0        | 0        | #N/A     | #N/A     | #N/A     | #N/A     | #N/A     | #N/A     |
| AT4G22110 | AT4G22110 | 0        | 0        | 0        | 0        | 0        | 0        | 0        | 0        | 0        | 0        | 1.330334 | 0        | 0        | NA       | 0        | NA       | 0.172362 | NA       |
| AT4G22115 | SCRL14    | 0        | 0        | 0        | 0        | 0        | 0        | 0        | 0        | 0        | 0.976246 | 0        | 0        | 0        | NA       | 0        | NA       | 0        | NA       |
| AT4G22120 | CSC1      | 219.9472 | 158.7979 | 167.3951 | 110.9398 | 98.70762 | 123.6083 | 105.8271 | 143.4924 | 81.02842 | 173.6759 | 180.9254 | 158.4937 | -0.70118 | 0.001468 | -0.71184 | 0.001868 | -0.09494 | 0.852695 |
| AT4G22130 | SRF8      | 356.6712 | 265.8527 | 291.0099 | 148.0572 | 152.3675 | 162.485  | 173.4142 | 162.9124 | 94.69586 | 338.7161 | 311.2981 | 310.772  | -0.95986 | 1.92E-06 | -1.05464 | 2.77E-07 | 0.067528 | 0.89034  |
| AT4G22140 | EBS       | 181.9023 | 196.2671 | 177.6963 | 240.4383 | 229.8761 | 182.4219 | 138.7313 | 176.938  | 206.9642 | 149.6876 | 110.4177 | 174.0323 | 0.235111 | 0.323836 | -0.0855  | 0.771055 | -0.33495 | 0.352    |
| AT4G22150 | PUX3      | 306.7372 | 340.791  | 315.4753 | 396.3314 | 459.0898 | 453.5626 | 440.2052 | 397.0315 | 452.0019 | 352.1496 | 392.4485 | 383.2854 | 0.437085 | 0.001228 | 0.42064  | 0.002749 | 0.226827 | 0.31633  |
| AT4G22160 | AT4G22160 | 123.646  | 158.7979 | 167.3951 | 115.0639 | 100.0326 | 95.69671 | 63.14055 | 67.97007 | 125.9317 | 169.8378 | 139.6851 | 161.6014 | -0.50095 | 0.055717 | -0.76776 | 0.003408 | 0.071285 | 0.90649  |
| AT4G22165 | AT4G22165 | 0        | 0        | 0        | 0        | 0        | 0        | 0        | 1.07889  | 0        | 0        | 0        | 0        | 0        | NA       | 0        | NA       | 0.16673  | NA       |
| AT4G22170 | AT4G22170 | 1.188904 | 1.784246 | 1.287654 | 3.71174  | 4.637271 | 1.993682 | 4.446517 | 6.47334  | 1.952492 | 3.838143 | 0        | 1.035907 | 0.657597 | 0.347298 | 0.813617 | 0.253889 | 0.095731 | NA       |
| AT4G22180 | AT4G22180 | 0        | 0        | 0        | 0        | 0        | 0        | 0        | 1.778607 | 0        | 0        | 0        | 0        | 0        | NA       | 0.26262  | NA       | 0.150298 | NA       |
| AT4G22185 | AT4G22185 | 0        | 0        | 0        | 0        | 0        | 0        | 0        | 0        | 0        | 0.959536 | 0        | 1.035907 | 0        | NA       | 0        | NA       | 0.332992 | NA       |
| AT4G22190 | AT4G22190 | 424.4387 | 485.3149 | 472.5691 | 433.0364 | 368.9943 | 440.6036 | 265.0124 | 269.7225 | 270.4201 | 363.6664 | 385.7969 | 335.6337 | -0.1493  | 0.32478  | -0.7668  | 9.92E-09 | -0.34395 | 0.076168 |
| AT4G22200 | AKT2      | 745.4428 | 603.0752 | 727.5247 | 219.4051 | 192.1155 | 172.4535 | 319.2599 | 234.1191 | 235.2753 | 764.7499 | 852.7441 | 767.6067 | -1.78875 | 1.12E-30 | -1.36997 | 3.64E-18 | 0.193403 | 0.510721 |
| AT4G22210 | LCR85     | 0        | 0        | 0        | 0        | 0.662467 | 0        | 0        | 0        | 0        | 0        | 0        | 0        | 0        | NA       | 0        | NA       | 0        | NA       |
| AT4G22212 | AT4G22212 | 0        | 0        | 1.287654 | 2.474493 | 3.312336 | 0        | 1.778607 | 0        | 0        | 0.976246 | 0        | 0        | 0.65395  | 0.280985 | 0.209162 | 0.771055 | -0.25419 | NA       |
| AT4G22214 | AT4G22214 | 0        | 0        | 0        | 0        | 0        | 0        | 0        | 0        | 0        | 0        | 0        | 0        | #N/A     | #N/A     | #N/A     | #N/A     | #N/A     | #N/A     |
| AT4G22217 | AT4G22217 | 0        | 0        | 0        | 0.412416 | 0        | 0        | 0        | 1.07889  | 0        | 0        | 0        | 0        | 0.064603 | NA       | 0.150774 | NA       | 0        | NA       |
| AT4G22220 | ISU1      | 802.5102 | 909.9655 | 997.9321 | 1333.34  | 1285.187 | 1166.304 | 1286.822 | 1186.779 | 1536.611 | 1132.252 | 1036.33  | 1076.307 | 0.477383 | 0.000589 | 0.558675 | 5.63E-05 | 0.257364 | 0.246344 |
| AT4G22230 | AT4G22230 | 0        | 1.784246 | 0        | 0.824831 | 1.324935 | 0        | 0.889303 | 2.15778  | 0.976246 | 0        | 0        | 0        | 0.146317 | NA       | 0.400783 | NA       | -0.30626 | NA       |
| AT4G22233 | AT4G22233 | 1.188904 | 0        | 0        | 0.412416 | 0        | 0.996841 | 0.889303 | 0        | 0        | 0        | 0        | 0        | 0.026949 | NA       | -0.05606 | NA       | -0.2335  | NA       |
| AT4G22235 | AT4G22235 | 1.188904 | 0        | 0        | 0.412416 | 0        | 0.996841 | 1.778607 | 0        | 0.976246 | 0        | 0        | 0        | -0.01817 | NA       | 0.253286 | NA       | -0.04843 | NA       |
| AT4G22240 | PAP2      | 775.1654 | 1000.962 | 938.7    | 907.3143 | 904.2678 | 878.2167 | 1303.719 | 1281.721 | 1230.07  | 948.0212 | 823.4767 | 966.5008 | -0.00923 | 0.959078 | 0.489527 | 0.000098 | 0.017334 | 0.960686 |
| AT4G22250 | AT4G22250 | 21.40027 | 19.62671 | 34.76667 | 33.81808 | 37.09817 | 21.9305  | 19.56468 | 23.73558 | 38.07359 | 31.66468 | 29.26735 | 41.43626 | 0.27176  | 0.524848 | 0.074044 | 0.889016 | 0.383409 | 0.572633 |
| AT4G22260 | AOX4      | 344.7821 | 540.6265 | 453.2543 | 457.7813 | 441.8657 | 498.2404 | 608.2836 | 600.9417 | 520.3391 | 492.2418 | 496.2146 | 507.5942 | 0.067406 | 0.749537 | 0.370975 | 0.034604 | 0.165296 | 0.594666 |
| AT4G22265 | AT4G22265 | 1.188904 | 0        | 0        | 0.412416 | 0        | 0        | 0.889303 | 0        | 0        | 0        | 2.660668 | 1.035907 | -0.19328 | NA       | -0.07267 | NA       | 0.336418 | NA       |
| AT4G22270 | MRB1      | 58.25629 | 42.8219  | 43.78025 | 27.21943 | 27.16116 | 29.90522 | 48.02239 | 44.23449 | 46.85981 | 39.34096 | 39.91002 | 37.29264 | -0.76455 | 0.005898 | -0.06523 | 0.865861 | -0.3118  | 0.543675 |
| AT4G22280 | AT4G22280 | 16.64466 | 32.11643 | 21.89012 | 25.56977 | 23.84882 | 19.93682 | 27.56841 | 16.18335 | 8.786214 | 22.06932 | 25.27635 | 14.50269 | 0.021589 | 0.969007 | -0.33417 | 0.51511  | -0.14875 | 0.878568 |
| AT4G22285 | AT4G22285 | 263.9367 | 272.9896 | 274.2704 | 269.7198 | 238.4882 | 266.1565 | 253.4515 | 267.5642 | 243.0853 | 222.6123 | 224.8264 | 262.0844 | -0.06453 | 0.722832 | -0.08493 | 0.655761 | -0.18806 | 0.472508 |
| AT4G22290 | AT4G22290 | 200.9248 | 164.1506 | 164.8198 | 85.78128 | 82.80841 | 95.69671 | 88.93035 | 93.86342 | 79.07593 | 163.1211 | 174.2738 | 152.2783 | -0.99694 | 7.36E-09 | -1.00056 | 3.90E-08 | -0.12022 | 0.745679 |
| AT4G22300 | SOBER1    | 54.68958 | 76.72258 | 63.09506 | 50.5784  | 99.37009 | 106.662  | 62.25124 | 65.81229 | 72.2422  | 99.79171 | 85.14137 | 85.98024 | 0.678565 | 0.001649 | 0.057536 | 0.859356 | 0.485625 | 0.147272 |
| AT4G22305 | AT4G22305 | 89.1678  | 85.64381 | 119.7519 | 190.536  | 203.3775 | 178.4345 | 103.1592 | 78.75897 | 111.292  | 69.08657 | 55.87403 | 70.44164 | 0.930044 | 0.97517  | -0.00989 | 0.97517  | -0.56813 | 0.07798  |
| AT4G22310 | MPC4      | 419.6831 | 513.8629 | 534.3766 | 692.4457 | 700.2279 | 559.2277 | 424.1978 | 393.7948 | 616.0112 | 580.5191 | 679.8007 | 576.9999 | 0.404775 | 0.043249 | -0.0311  | 0.910747 | 0.316064 | 0.311232 |
| AT4G22320 | AT4G22320 | 43.98945 | 35.68492 | 54.08148 | 57.73818 | 78.17114 | 47.84836 | 50.70783 | 69.31347 | 53.734   | 41.24035 | 40.40035 | 0        | 0.42671  | 0.17876  | 0.279228 | 0.044775 | 0.00804  | 0.992838 |
| AT4G22330 | ATCES1    | 449.4057 | 501.3731 | 441.6654 | 492.4242 | 560.4473 | 531.3161 | 504.2351 | 522.1827 | 532.0541 | 407.8026 | 493.5539 | 424.7217 | 0.186083 | 0.188657 | 0.164353 | 0.282605 | -0.06991 | 0.810026 |
| AT4G22340 | CD52      | 115.3237 | 126.6815 | 117.1765 | 107.6405 | 107.3197 | 103.6714 | 111.1629 | 75.5223  | 82.98091 | 106.5085 | 126.3817 | 96.33931 | -0.16103 | 0.502377 | -0.38971 | 0.092792 | -0.12474 | 0.779875 |
| AT4G22350 | AT4G22350 | 126.0238 | 151.6609 | 128.7516 | 150.1193 | 137.7932 | 142.5842 | 129.8383 | 181.2535 | 133.7457 | 135.2945 | 142.3457 | 134.6678 | 0.092533 | 0.693952 | 0.139094 | 0.095929 | 0.02732  | 0.959117 |
| AT4G22360 | AT4G22360 | 227.0807 | 228.3835 | 191.8605 | 190.536  | 205.3649 | 234.2576 | 216.99   | 235.198  | 228.4416 | 192.8667 | 174.2738 | 164.7071 | -0.04531 | 0.830654 | 0.073072 | 0.73838  | -0.27353 | 0.311768 |
| AT4G22370 | AT4G22370 | 4.755616 | 7.136984 | 3.862963 | 0.824831 | 1.987402 | 4.984204 | 2.66791  | 1.07889  | 1.952492 | 5.757214 | 5.321336 | 2.071813 | -0.71769 | 0.288324 | -0.82087 | 0.24383  | -0.14195 | NA       |
| AT4G22380 | AT4G22380 | 204.4915 | 217.678  | 278.1333 | 341.8925 | 432.5911 | 277.1217 | 295.2488 | 222.2513 | 396.3559 | 277.3058 | 288.6825 | 254.833  | 0.56674  | 0.017263 | 0.369497 | 0.161301 | 0.218242 | 0.625408 |
| AT4G22390 | AT4G22390 | 8.322328 | 16.05821 | 16.73951 | 15.67179 | 9.937009 | 20.93366 | 8.007331 | 8.63112  | 0.585476 | 14.39303 | 13.30334 | 14.50269 | 0.163452 | 0.773158 | -0.69193 | 0.197959 | 0.058813 | NA       |
| AT4G22400 | AT4G22400 | 0        | 0        | 0.412416 | 0        | 0        | 1.778607 | 0        | 0        | 0        | 1.330334 | 0        | 0        | 0.0517   | NA       | 0.275954 | NA       | 0.182157 | NA       |
| AT4G22410 | AT4G22410 | 54.68958 | 42.8219  | 37.34198 | 31.756   | 27.16116 | 39.87363 | 45.35448 | 53.9445  | 47.83605 | 34.54328 | 30.59768 | 41.43626 | -0.45222 | 0.143694 | 0.110075 | 0.779436 | -0.3187  | 0.562251 |
| AT4G22415 | AT4G22415 | 0        | 0        | 0.412416 | 0        | 0        | 0        | 0        | 0        | 0        | 0        | 0        | 0        | 0.095918 | NA       | 0        | NA       | 0        | NA       |
| AT4G22420 | AT4G22420 | 0        | 0        | 0.412416 | 0        | 0.996841 | 0        | 0        | 0        | 0        | 0        | 0        | 0        | 0.224618 | NA       | 0        | NA       | 0        | NA       |
| AT4G22430 | AT4G22430 | 0        | 0        | 0        | 0        | 0        | 0        | 0        | 0        | 0        | 0        | 0        | 0        | #N/A     | #N/A     | #N/A     | #N/A     | #N/A     | #N/A     |
| AT4G22440 | AT4G22440 | 0        | 0        | 0        | 0.662467 | 0        | 0        | 0        | 0        | 0        | 0        | 1.330334 | 0        | 0.101524 | NA       | 0        | NA       | 0.179327 | NA       |
| AT4G22450 | AT4G22450 | 0        | 0        | 0.412416 | 0        | 0        | 0.889303 | 1.07889  | 0        | 0        | 0        | 0        | 0        | 0.058291 | NA       | 0.343513 | NA       | 0.183181 | NA       |
| AT4G22460 | AT4G22460 | 0        | 0        | 1.287654 | 0        | 0        | 0        | 0        | 0        | 0.959536 | 0        | 0        | 0        | -0.22221 | NA       | -0.2076  | NA       | -0.03666 | NA       |
| AT4G22470 | AT4G22470 | 4.755616 | 8.92123  | 7.725926 | 28.04426 | 32.4609  | 47.84836 | 32.01493 | 16.18335 | 14.64369 | 1.919071 | 6.65167  | 3.10772  | 1.988225 | 1.01E-05 | 1.296311 | 0.008662 | -0.61591 | 0.518943 |
| AT4G22485 | AT4G22485 | 130.7794 | 69.5856  | 93.99877 | 82.48311 | 68.23413 | 162.485  | 47.13308 | 52.86561 | 35.14486 | 95.95356 | 58.5     |          |          |          |          |          |          |          |

|           |           |          |           |          |          |          |          |          |          |          |          |          |          |          |          |           |          |          |          |
|-----------|-----------|----------|-----------|----------|----------|----------|----------|----------|----------|----------|----------|----------|----------|----------|----------|-----------|----------|----------|----------|
| AT4G22840 | BASS6     | 86.78999 | 139.1712  | 115.8889 | 103.1039 | 112.6194 | 121.6146 | 116.4988 | 90.62675 | 55.64602 | 89.23681 | 83.81104 | 72.51346 | -0.01027 | 0.977331 | -0.34646  | 0.261288 | -0.44189 | 0.310396 |
| AT4G22850 | AT4G22850 | 70.14533 | 94.56504  | 65.67037 | 90.31901 | 107.3197 | 119.6209 | 93.36787 | 70.12785 | 83.95716 | 78.68192 | 79.82004 | 80.80071 | 0.451679 | 0.0546   | 0.12264   | 0.688012 | 0.070905 | 0.900085 |
| AT4G22860 | AT4G22860 | 66.57862 | 58.80012  | 41.20944 | 56.08852 | 60.94699 | 50.83888 | 54.24751 | 47.47116 | 55.65307 | 55.65307 | 73.16837 | 69.40574 | 0.016823 | 0.953686 | -0.22656  | 0.446716 | 0.232526 | 0.656746 |
| AT4G22870 | AT4G22870 | 2.377808 | 0         | 0        | 0        | 0.662467 | 0        | 2.66791  | 3.23667  | 2.928738 | 3.838143 | 0        | 1.035907 | -0.46507 | 0.503475 | 0.726117  | 0.294574 | 0.328654 | NA       |
| AT4G22880 | LDOX      | 46.36725 | 30.32118  | 32.19136 | 28.86909 | 23.84882 | 26.9147  | 24.9005  | 25.89336 | 26.35864 | 108.4275 | 103.766  | 70.44164 | -0.43847 | 0.18843  | -0.481    | 0.183129 | 1.296631 | 9.51E-05 |
| AT4G22890 | PGRL1A    | 6552.05  | 7236.902  | 7576.558 | 3325.719 | 3656.819 | 3496.917 | 6103.29  | 5187.303 | 5531.41  | 9912.003 | 9976.174 | 9622.356 | -1.02029 | 1.61E-25 | -0.34205  | 0.001364 | 0.642758 | 0.000117 |
| AT4G22900 | AT4G22900 | 10.70014 | 14.27397  | 6.438272 | 7.42348  | 7.28714  | 10.96525 | 10.67164 | 6.47334  | 9.76246  | 12.47396 | 14.63367 | 9.323159 | -0.24904 | 0.625203 | -0.14388  | 0.831872 | 0.199235 | NA       |
| AT4G22910 | FRZ2      | 124.8349 | 153.4452  | 121.0395 | 108.0529 | 109.3071 | 111.6462 | 117.3881 | 117.599  | 66.38473 | 102.6703 | 121.0604 | 117.0574 | -0.26246 | 0.297381 | -0.38345  | 0.1346   | -0.21543 | 0.620802 |
| AT4G22920 | SGR1      | 177.1467 | 233.7362  | 208.6    | 315.9103 | 332.5586 | 311.0143 | 332.5995 | 292.3792 | 299.7075 | 209.1788 | 187.5771 | 245.5098 | 0.630959 | 6.03E-05 | 0.578857  | 0.000397 | 0.065044 | 0.868508 |
| AT4G22930 | PYR4      | 406.6051 | 408.5923  | 423.6383 | 374.0603 | 427.9539 | 381.79   | 407.301  | 381.927  | 407.0946 | 450.9817 | 437.6799 | 414.3626 | -0.06597 | 0.668591 | -0.04943  | 0.774099 | 0.071887 | 0.790363 |
| AT4G22940 | AT4G22940 | 1.188904 | 1.7136984 | 5.150617 | 3.299325 | 1.324935 | 4.984204 | 2.66791  | 2.15778  | 4.88123  | 2.878607 | 3.991002 | 2.071813 | -0.28452 | 0.708208 | -0.23959  | 0.172838 | -0.32439 | NA       |
| AT4G22950 | AGL19     | 3.566712 | 5.352738  | 2.575309 | 22.27044 | 18.54908 | 15.94945 | 15.11816 | 17.26224 | 20.50117 | 2.878607 | 6.65167  | 7.251346 | 1.830198 | 0.000156 | 1.699909  | 0.000749 | 0.318361 | NA       |
| AT4G22960 | AT4G22960 | 3.566712 | 1.7136984 | 3.862963 | 9.897974 | 8.612075 | 13.95577 | 5.335821 | 9.710009 | 4.88123  | 4.797678 | 2.660668 | 1.035907 | 0.925055 | 0.109199 | 0.345498  | 0.632872 | -0.44069 | NA       |
| AT4G22970 | ESP1      | 67.76752 | 71.36984  | 55.36914 | 41.24156 | 33.78583 | 31.8989  | 40.90796 | 37.76115 | 30.26363 | 45.09817 | 41.24035 | 64.2262  | -0.79249 | 0.004071 | -0.78283  | 0.000754 | -0.33651 | 0.498675 |
| AT4G22980 | AT4G22980 | 52.31177 | 73.15409  | 48.93086 | 73.82239 | 84.79581 | 76.75674 | 91.59826 | 97.10009 | 120.0783 | 44.13864 | 45.23135 | 51.79533 | 0.436891 | 0.084679 | 0.817603  | 0.000072 | -0.26654 | 0.582115 |
| AT4G22990 | AT4G22990 | 360.2379 | 374.6917  | 364.4062 | 177.3387 | 172.2415 | 195.3808 | 257.898  | 266.4858 | 178.653  | 349.271  | 343.2262 | 368.7827 | -0.99751 | 2.56E-10 | -0.63261  | 0.000143 | -0.04798 | 0.903861 |
| AT4G23000 | AT4G23000 | 57.06739 | 49.95889  | 63.09506 | 92.38109 | 52.99738 | 110.6493 | 81.81592 | 75.5223  | 51.74104 | 57.57214 | 69.17737 | 45.57989 | 0.539785 | 0.092738 | 0.271338  | 0.47478  | 0.002608 | 0.997319 |
| AT4G23010 | UTR2      | 375.6936 | 478.1779  | 343.8037 | 722.1397 | 754.5502 | 930.0524 | 608.2836 | 622.5195 | 534.0066 | 273.4677 | 246.1118 | 279.6948 | 0.993308 | 1.93E-10 | 0.555769  | 0.000931 | -0.56242 | 0.000582 |
| AT4G23020 | AT4G23020 | 118.8904 | 101.702   | 122.3272 | 31.34358 | 39.74804 | 47.84836 | 32.90423 | 35.60337 | 53.69353 | 140.0922 | 143.6761 | 139.8474 | -1.51319 | 1.55E-11 | -1.43368  | 1.25E-09 | 0.291093 | 0.457541 |
| AT4G23030 | AT4G23030 | 26.15589 | 44.60615  | 18.02716 | 64.74925 | 64.25933 | 70.7757  | 57.80473 | 45.31338 | 48.8123  | 12.47396 | 15.96401 | 15.53876 | 1.151066 | 0.000106 | 0.777094  | 0.01804  | -0.86441 | 0.088924 |
| AT4G23040 | PUX13     | 111.5575 | 144.5239  | 105.5877 | 146.8199 | 145.0803 | 158.4977 | 167.1891 | 169.3857 | 124.9559 | 166.9592 | 155.6491 | 153.3142 | 0.318361 | 0.121591 | 0.356224  | 0.09785  | 0.401121 | 0.177994 |
| AT4G23050 | AT4G23050 | 154.5575 | 183.7773  | 135.2037 | 157.5427 | 161.642  | 180.4282 | 177.8607 | 177.8607 | 178.653  | 185.1904 | 220.8354 | 162.6373 | 0.078796 | 0.743426 | 0.279391  | 0.196616 | 0.261628 | 0.42758  |
| AT4G23060 | IQD22     | 124.8349 | 174.8561  | 101.7247 | 77.12171 | 82.14594 | 69.77885 | 89.81965 | 99.25787 | 76.14719 | 58.53167 | 82.48071 | 103.5907 | -0.75675 | 0.002792 | -0.55975  | 0.040575 | -0.67286 | 0.058541 |
| AT4G23070 | ATRB17    | 1.188904 | 0         | 0        | 0        | 1.987402 | 2.990522 | 0.889303 | 0        | 0        | 0        | 2.660668 | 0        | 0.436865 | NA       | -0.07596  | NA       | 0.146451 | NA       |
| AT4G23080 | AT4G23080 | 0        | 0         | 0        | 0        | 0        | 0        | 0        | 0.976246 | 0        | 0        | 0        | 0        | 0        | NA       | 0.16673   | NA       | 0        | NA       |
| AT4G23090 | AT4G23090 | 0        | 0         | 0        | 0        | 0        | 0        | 0.889303 | 0        | 0        | 0        | 0        | 0        | 0        | NA       | 0.160764  | NA       | 0        | NA       |
| AT4G23100 | GSH1      | 2145.972 | 2069.725  | 1814.305 | 1404.275 | 1479.289 | 1597.936 | 1779.496 | 2198.778 | 2526.525 | 1902.759 | 1772.005 | 1956.827 | -0.42292 | 0.004332 | -0.017685 | 0.559343 | -0.09671 | 0.752644 |
| AT4G23103 | AT4G23103 | 0        | 0         | 0        | 0        | 0        | 0        | 0        | 0        | 0        | 0        | 0        | 0        | #N/A     | #N/A     | #N/A      | #N/A     | #N/A     | #N/A     |
| AT4G23110 | AT4G23110 | 0        | 0         | 0        | 0        | 0        | 0        | 0        | 0        | 0        | 0.995936 | 0        | 0        | 0        | NA       | 0         | NA       | 0.171512 | NA       |
| AT4G23120 | AT4G23120 | 0        | 0         | 0        | 0        | 0        | 0        | 1.778607 | 0        | 0        | 0        | 0        | 1.035907 | 0        | NA       | 0.26262   | NA       | 0.150298 | NA       |
| AT4G23130 | CRK5      | 172.3911 | 231.952   | 168.6827 | 424.3756 | 396.8179 | 443.5941 | 251.6729 | 270.8014 | 200.1304 | 103.6298 | 98.44471 | 123.2729 | 1.131538 | 2.94E-11 | 0.338396  | 0.097445 | -0.77754 | 0.000818 |
| AT4G23140 | CRK6      | 122.4571 | 242.6575  | 167.3951 | 116.6589 | 1057.298 | 1137.395 | 524.6891 | 490.8949 | 397.3321 | 55.65307 | 54.54369 | 49.72351 | 2.604825 | 3.99E-12 | 1.384535  | 3.99E-12 | -1.62966 | 2.62E-11 |
| AT4G23150 | CRK7      | 53.00608 | 58.88012  | 38.62963 | 603.7764 | 486.9134 | 577.1708 | 394.8507 | 402.4259 | 295.8025 | 14.39303 | 13.30334 | 20.71813 | 3.370188 | 1.33E-58 | 2.77032   | 4.85E-39 | -1.43504 | 2.08E-05 |
| AT4G23160 | CRK8      | 40.42273 | 41.03766  | 47.64321 | 257.3473 | 217.9517 | 285.0965 | 149.403  | 144.5713 | 108.3633 | 21.10978 | 13.30334 | 19.68222 | 2.465614 | 3.37E-28 | 2.568745  | 3.08E-11 | -1.11305 | 0.002866 |
| AT4G23170 | CRK9      | 198.547  | 214.1095  | 184.1346 | 496.5484 | 631.9938 | 591.1266 | 495.342  | 515.7094 | 578.9139 | 124.7396 | 123.7211 | 109.8061 | 1.504037 | 2.55E-24 | 1.394672  | 1.29E-20 | -0.71494 | 0.000629 |
| AT4G23180 | CRK10     | 521.9288 | 515.6471  | 464.8432 | 602.5392 | 625.3691 | 717.7254 | 788.8122 | 763.8541 | 734.137  | 340.6351 | 416.3945 | 337.7055 | 0.365439 | 0.007751 | 0.599949  | 5.97E-06 | -0.45482 | 0.01087  |
| AT4G23190 | CRK11     | 53.50068 | 74.93833  | 48.93086 | 249.5114 | 208.6772 | 253.1976 | 278.352  | 270.8014 | 206.9642 | 43.1791  | 47.89202 | 54.90305 | 1.95988  | 6.31E-21 | 1.054452  | 1.97E-22 | -0.24694 | 0.604618 |
| AT4G23200 | CRK12     | 21.40027 | 32.11643  | 36.05432 | 108.0529 | 127.8562 | 134.5735 | 146.7351 | 122.9935 | 96.64835 | 14.39303 | 18.62468 | 19.68222 | 1.948173 | 1.92E-13 | 1.938987  | 4.98E-13 | -0.68034 | 0.183554 |
| AT4G23205 | AT4G23205 | 1.188904 | 1.784246  | 0        | 0.824831 | 0.662467 | 1.993682 | 1.07889  | 0.976246 | 2.878607 | 1.330334 | 0        | 0        | 0.057531 | 0.945433 | 0.008068  | 0.992445 | 0.290247 | 0.892445 |
| AT4G23210 | CRK13     | 43.98945 | 80.29107  | 47.64321 | 195.8974 | 162.3045 | 188.4029 | 282.7955 | 291.3003 | 246.014  | 61.41028 | 67.84703 | 50.75942 | 1.647878 | 7.94E-15 | 2.218184  | 2.38E-26 | 0.089476 | 0.788814 |
| AT4G23215 | AT4G23215 | 5.94452  | 8.92123   | 1.287654 | 84.79581 | 61.65828 | 84.79581 | 61.65828 | 61.65828 | 61.65828 | 61.65828 | 61.65828 | 61.65828 | 3.37648  | 2.08E-18 | 3.265438  | 5.37E-17 | -0.2822  | 0.792429 |
| AT4G23220 | CRK14     | 136.724  | 148.0924  | 118.4642 | 666.876  | 545.2106 | 680.8423 | 419.7512 | 376.5326 | 288.9688 | 50.85539 | 49.22236 | 62.15439 | 2.184516 | 6.18E-34 | 1.397776  | 6.7E-14  | -1.24419 | 3.55E-07 |
| AT4G23230 | CRK15     | 48.74506 | 49.95889  | 45.0679  | 176.5139 | 177.5412 | 193.3871 | 121.8346 | 108.9679 | 73.21845 | 19.19071 | 15.96401 | 19.68222 | 1.864409 | 4.96E-16 | 1.039541  | 3.33E-05 | -1.25026 | 0.000531 |
| AT4G23240 | CRK16     | 35.66712 | 32.11643  | 27.0479  | 47.42779 | 64.92179 | 55.82308 | 36.46144 | 36.68226 | 26.35864 | 11.51443 | 22.61568 | 25.89766 | 0.772589 | 0.016813 | 0.062192  | 0.895699 | -0.61397 | 0.275323 |
| AT4G23250 | EMB1290   | 235.403  | 280.1266  | 261.3938 | 424.3756 | 393.5056 | 444.591  | 570.9328 | 468.2382 | 335.8286 | 218.7741 | 251.4331 | 248.6176 | 0.685534 | 0.000345 | 0.807441  | 2.44E-05 | -0.10766 | 0.804354 |
| AT4G23260 | CRK18     | 422.0609 | 494.2362  | 427.5012 | 1313.131 | 1397.806 | 1401.558 | 1844.415 | 1732.697 | 1285.716 | 515.2706 | 484.2416 | 494.1274 | 1.59086  | 1.39E-28 | 1.829647  | 1.34E-37 | 0.153475 | 0.610332 |
| AT4G23270 | CRK19     | 449.4057 | 587.0169  | 471.2815 | 897.4163 | 845.3082 | 904.1346 | 953.3333 | 915.9776 | 677.5147 | 446.1841 | 492.2236 | 500.3429 | 0.802635 | 3.26E-07 | 0.748046  | 2.82E-06 | -0.06218 | 0.874304 |
| AT4G23271 | AT4G23271 | 1.188904 | 0         | 0        | 0.186234 | 0.596205 | 6.977885 | 5.335821 | 5.39445  | 1.952492 | 0.995936 | 2.660668 | 1.035907 | 1.678625 | 0.006185 | 1.20889   | 0.069552 | 0.368406 | NA       |
| AT4G23280 | CRK20     | 7.133424 | 17.84246  | 10.30123 | 35.05532 | 26.49869 | 34.88943 | 24.9005  | 34.52448 | 22.45366 | 5.995356 | 11.97301 | 18.64632 | 1.330023 | 0.000859 | 1.098472  | 0.010236 | 0.195985 | 0.845171 |
| AT4G23290 | CRK21     | 643.197  | 738.6779  | 686.3198 | 132.7978 | 129.1811 | 149.5261 | 237.444  | 175.8911 | 31.7932  | 660.1605 | 631.9086 | 861.8745 | -2.26614 | 5.67E-33 | -1.86519  | 1.96E-22 | 0.059661 | 0.900456 |
| AT4G23300 | CRK22     | 305.5458 | 383.6129  | 329.6395 | 300.2385 | 257.0373 | 338.9259 |          |          |          |          |          |          |          |          |           |          |          |          |



|           |           |          |          |          |          |          |          |          |          |          |          |          |          |          |          |          |          |           |          |
|-----------|-----------|----------|----------|----------|----------|----------|----------|----------|----------|----------|----------|----------|----------|----------|----------|----------|----------|-----------|----------|
| AT4G23770 | AT4G23770 | 65.38972 | 60.66437 | 72.10864 | 52.78919 | 56.97219 | 53.8294  | 24.01119 | 19.42002 | 34.16861 | 84.43914 | 90.46271 | 70.44164 | -0.27109 | 0.328538 | -1.2754  | 2.22E-06 | 0.288745  | 0.517803 |
| AT4G23780 | AT4G23780 | 0        | 0        | 1.287654 | 0        | 0        | 1.993682 | 0.889303 | 2.15778  | 0.976246 | 1.919071 | 0        | 1.035907 | 0.000417 | 0.999765 | 0.380534 | 0.576036 | 0.256416  | NA       |
| AT4G23790 | BL24      | 175.9578 | 181.9931 | 189.2852 | 138.984  | 147.0677 | 150.523  | 95.15547 | 119.7568 | 112.2683 | 165.0041 | 172.9434 | 161.6014 | -0.32459 | 0.057126 | -0.73174 | 1.59E-05 | -0.1303   | 0.696168 |
| AT4G23800 | HMG6      | 518.3621 | 454.9827 | 503.4728 | 724.2017 | 792.3109 | 774.5453 | 578.9366 | 638.7028 | 790.7593 | 576.6809 | 546.7673 | 573.8922 | 0.620905 | 7.73E-06 | 0.43378  | 0.00333  | 0.195448  | 0.440256 |
| AT4G23810 | WRKY53    | 41.61164 | 58.88012 | 41.20494 | 370.3492 | 348.4578 | 476.4899 | 254.1045 | 245.9869 | 253.824  | 33.58375 | 27.93701 | 29.00538 | 2.998136 | 5.06E-47 | 2.290937 | 7.35E-27 | -0.56963  | 0.166982 |
| AT4G23820 | AT4G23820 | 1118.759 | 1284.657 | 1205.244 | 566.2466 | 449.8153 | 799.4663 | 578.0473 | 659.2018 | 542.7928 | 1048.772 | 897.9754 | 106.6636 | -0.69992 | 1.7E-07  | -0.99973 | 1.01E-07 | -0.26177  | 0.432612 |
| AT4G23840 | AT4G23840 | 73.12104 | 64.23286 | 59.2321  | 70.11065 | 71.54647 | 83.73463 | 70.25498 | 112.2046 | 46.85981 | 53.734   | 51.88302 | 51.79533 | 0.173255 | 0.619544 | 0.196757 | 0.593532 | -0.30688  | 0.580987 |
| AT4G23850 | LACS4     | 2277.94  | 2385.537 | 2182.574 | 2376.751 | 2320.623 | 2723.369 | 2295.292 | 2590.415 | 2012.043 | 1995.834 | 2081.973 | 1950.612 | 0.114697 | 0.433244 | 0.01095  | 0.951995 | -0.18136  | 0.395958 |
| AT4G23860 | AT4G23860 | 272.259  | 319.38   | 256.2432 | 277.1433 | 302.7475 | 291.0775 | 286.3557 | 274.038  | 254.8002 | 303.2133 | 308.6375 | 261.0484 | 0.044139 | 0.819325 | -0.04759 | 0.819447 | 0.047381  | 0.8948   |
| AT4G23870 | AT4G23870 | 117.7015 | 149.8767 | 130.0531 | 80.42104 | 111.957  | 107.6588 | 96.04478 | 78.75897 | 136.6744 | 124.7396 | 102.4357 | 88.05205 | -0.39309 | 0.135497 | -0.32879 | 0.251817 | -0.31174  | 0.48147  |
| AT4G23880 | AT4G23880 | 77.27876 | 90.99655 | 70.8565  | 207.0326 | 266.9743 | 230.2702 | 229.4403 | 135.9401 | 322.1612 | 97.87263 | 103.766  | 102.5547 | 1.390082 | 7.33E-08 | 1.35924  | 1.98E-07 | 0.235579  | 0.66507  |
| AT4G23882 | AT4G23882 | 1.188904 | 1.784246 | 0        | 1.649662 | 1.324935 | 0.996841 | 2.66791  | 1.07889  | 1.952492 | 0.959536 | 0        | 2.071813 | 0.179296 | 8.22E-57 | 0.404883 | 0.597739 | 0.040521  | NA       |
| AT4G23885 | AT4G23885 | 46.36725 | 37.46917 | 37.34198 | 148.0572 | 117.2567 | 102.6746 | 89.81965 | 62.57562 | 114.2208 | 35.50282 | 59.86503 | 46.61579 | 1.512644 | 5.17E-08 | 1.059339 | 0.000353 | 0.183403  | 0.781222 |
| AT4G23890 | ndh5      | 991.5459 | 1113.37  | 1000.507 | 759.6695 | 773.0993 | 695.7949 | 771.9154 | 805.9308 | 1219.331 | 1325.119 | 1274.46  | 1079.415 | -0.46654 | 0.011326 | -0.14661 | 0.513882 | 0.240195  | 0.443857 |
| AT4G23895 | AT4G23895 | 97.49012 | 80.29107 | 114.6012 | 105.166  | 117.9192 | 89.71567 | 95.15547 | 96.0212  | 98.60085 | 119.942  | 97.11438 | 109.8061 | 0.090577 | 0.730034 | -0.02576 | 0.933421 | -0.149716 | 0.703349 |
| AT4G23900 | NDK4      | 1.188904 | 3.568492 | 0        | 2.062078 | 0        | 1.993682 | 0.889303 | 1.07889  | 2.928738 | 0        | 2.660668 | 1.035907 | -0.03845 | 0.963474 | 0.067173 | 0.938057 | -0.1166   | NA       |
| AT4G23910 | AT4G23910 | 99.86793 | 167.7191 | 148.0802 | 191.7732 | 188.8032 | 199.3682 | 169.857  | 154.2813 | 142.5319 | 155.4448 | 143.6761 | 132.596  | 0.484272 | 0.104518 | 0.180201 | 0.460678 | 0.07053   | 0.880929 |
| AT4G23915 | AT4G23915 | 0        | 0        | 0        | 0        | 0        | 0        | 0        | 0        | 0        | 0        | 0        | 0        | #N/A     | #N/A     | #N/A     | #N/A     | #N/A      | #N/A     |
| AT4G23920 | UGE2      | 57.06739 | 83.85956 | 54.08148 | 58.97543 | 60.28452 | 71.77254 | 84.48383 | 73.36452 | 58.57476 | 48.93632 | 53.21336 | 52.83123 | -0.01714 | 0.961026 | 0.17095  | 0.597311 | -0.29464  | 0.540577 |
| AT4G23930 | AT4G23930 | 4.755616 | 5.352738 | 10.30123 | 7.835896 | 7.949607 | 9.968408 | 16.00746 | 10.7889  | 13.66744 | 9.595356 | 10.64267 | 3.10772  | 0.217616 | 0.734496 | 0.7888   | 0.163731 | 0.11149   | NA       |
| AT4G23940 | AT4G23940 | 596.8298 | 485.3149 | 506.0482 | 289.1033 | 239.8132 | 322.9764 | 394.8507 | 452.0549 | 347.5436 | 579.5955 | 509.5179 | 527.2764 | -0.88956 | 1.39E-08 | -0.40768 | 0.01828  | 0.023416  | 0.958253 |
| AT4G23950 | AT4G23950 | 45.17835 | 71.36984 | 61.80741 | 65.16166 | 82.14594 | 61.80413 | 64.02985 | 74.44341 | 86.88589 | 61.41028 | 51.88302 | 71.47755 | 0.240786 | 0.416983 | 0.339091 | 0.260644 | 0.074387  | 0.909153 |
| AT4G23960 | AT4G23960 | 0        | 0        | 1.287654 | 0        | 0        | 0.662467 | 0        | 1.07889  | 0        | 0.959536 | 0        | 0        | -0.12019 | NA       | -0.04483 | NA       | -0.0466   | NA       |
| AT4G23970 | AT4G23970 | 0        | 0        | 0        | 0        | 0.662467 | 0        | 0.889303 | 0        | 0        | 1.330334 | 0        | 0        | 0.09913  | NA       | 0.145297 | NA       | 0.18929   | NA       |
| AT4G23980 | ARF9      | 309.115  | 246.226  | 248.5173 | 221.0547 | 217.2893 | 241.2355 | 177.8607 | 192.0424 | 162.0568 | 198.6239 | 231.4781 | 223.7558 | -0.24805 | 0.145045 | -0.5924  | 0.00029  | -0.30219  | 0.233702 |
| AT4G23990 | CSL6      | 91.5456  | 62.44861 | 75.97161 | 77.94654 | 67.57166 | 80.7441  | 48.91169 | 52.86561 | 38.07359 | 94.03449 | 91.79304 | 93.23159 | -0.04167 | 0.982089 | -0.70742 | 0.004735 | 0.524102  | 0.506492 |
| AT4G24000 | CSL6      | 8.322328 | 5.352738 | 12.87654 | 33.40566 | 33.12336 | 56.81992 | 90.70896 | 88.46897 | 54.66978 | 4.797678 | 11.97301 | 13.46678 | 1.824502 | 5.69E-06 | 2.76904  | 3.27E-12 | 0.062449  | 0.960136 |
| AT4G24010 | CSL6      | 33.28903 | 23.1952  | 24.46543 | 9.485558 | 11.26194 | 12.95893 | 3.335821 | 7.55223  | 1.952492 | 26.867   | 31.92802 | 24.86176 | -1.17359 | 0.002464 | -2.05162 | 1.76E-06 | 0.030877  | 0.977328 |
| AT4G24015 | RHA4A     | 42.80054 | 57.09587 | 42.49259 | 68.04857 | 88.10815 | 67.78517 | 64.19833 | 85.23231 | 80.05217 | 70.0461  | 51.88302 | 49.72351 | 0.642263 | 0.012918 | 0.792861 | 0.002467 | 0.281362  | 0.567564 |
| AT4G24020 | NLP7      | 638.4414 | 569.1745 | 571.1785 | 463.9675 | 451.8027 | 521.3477 | 657.1937 | 650.5706 | 483.2418 | 470.1725 | 469.6079 | 511.7378 | -0.30784 | 0.051831 | 0.007842 | 0.971733 | -0.29033  | 0.222716 |
| AT4G24025 | AT4G24025 | 0        | 0        | 0        | 0        | 0        | 0        | 0        | 0        | 0        | 0        | 0        | 0        | #N/A     | #N/A     | #N/A     | #N/A     | #N/A      | #N/A     |
| AT4G24026 | AT4G24026 | 4.755616 | 0        | 1.287654 | 2.474493 | 3.312336 | 0.996841 | 0.889303 | 0        | 1.952492 | 0        | 5.321336 | 2.071813 | 0.069006 | 0.936672 | -0.42898 | 0.577796 | 0.052897  | NA       |
| AT4G24030 | AT4G24030 | 0        | 0        | 1.421416 | 0        | 0        | 0        | 0        | 0        | 0        | 0        | 0        | 0        | 0.095918 | NA       | 0        | NA       | 0         | NA       |
| AT4G24040 | TRE1      | 51.12287 | 78.50683 | 56.65679 | 122.075  | 117.9192 | 155.5072 | 134.2848 | 130.5457 | 86.88589 | 44.13864 | 49.22236 | 42.47217 | 1.055337 | 1.56E-05 | 0.898962 | 0.000443 | -0.141434 | 0.366959 |
| AT4G24050 | AT4G24050 | 46.36725 | 80.29107 | 60.51975 | 63.92441 | 44.38531 | 76.75674 | 66.69776 | 51.78672 | 42.95482 | 85.39867 | 73.16837 | 69.40574 | -0.00537 | 0.989628 | -0.17674 | 0.639487 | 0.292588  | 0.585616 |
| AT4G24060 | DOF4.6    | 277.0146 | 198.0513 | 247.2296 | 261.0591 | 260.3496 | 303.0396 | 289.9129 | 269.7225 | 239.1803 | 244.6816 | 223.4961 | 253.7971 | 0.171257 | 0.363534 | 0.132506 | 0.525592 | -0.00898  | 0.986206 |
| AT4G24070 | AT4G24070 | 0        | 0        | 0        | 0        | 0        | 0        | 0        | 0        | 0        | 0        | 0        | 0        | #N/A     | #N/A     | #N/A     | #N/A     | #N/A      | #N/A     |
| AT4G24080 | ALL1      | 0        | 1.784246 | 2.575309 | 3.71174  | 3.312336 | 1.993682 | 1.77867  | 2.15778  | 2.928738 | 0.959536 | 1.330334 | 2.071813 | 0.59628  | 0.402721 | 0.307516 | 0.707157 | -0.00045  | NA       |
| AT4G24090 | AT4G24090 | 355.4823 | 406.8081 | 395.3099 | 327.8704 | 343.158  | 358.8627 | 347.7177 | 360.3492 | 521.3154 | 481.6869 | 536.1246 | 469.2657 | -0.16543 | 0.41078  | 0.08716  | 0.705627 | 0.355073  | 0.177994 |
| AT4G24100 | AT4G24100 | 206.8693 | 199.8356 | 167.3951 | 139.3965 | 147.0677 | 180.4267 | 180.4267 | 180.4267 | 143.5082 | 195.7453 | 223.4961 | 174.0323 | -0.30315 | 0.12006  | -0.25985 | 0.222863 | 0.043404  | 0.926068 |
| AT4G24110 | AT4G24110 | 5.94452  | 3.568492 | 6.438272 | 7.42348  | 15.23675 | 8.971567 | 8.893035 | 15.10446 | 8.521336 | 8.38143  | 5.321336 | 8.278252 | 0.668727 | 0.263999 | 1.441108 | 0.011093 | 0.042642  | NA       |
| AT4G24120 | YSL1      | 259.1811 | 174.8561 | 218.9012 | 373.6485 | 386.2184 | 373.8153 | 351.2749 | 311.7992 | 292.8738 | 146.809  | 183.5861 | 203.0377 | 0.768789 | 7.37E-06 | 0.527753 | 0.004122 | -0.29934  | 0.322058 |
| AT4G24130 | AT4G24130 | 26.15589 | 28.54794 | 48.93086 | 42.89122 | 21.19895 | 28.90838 | 30.23632 | 34.52448 | 34.16861 | 72.92471 | 89.13238 | 59.04667 | -0.1308  | 0.764901 | -0.07343 | 0.882221 | 1.002158  | 0.020693 |
| AT4G24140 | AT4G24140 | 34.47821 | 48.17464 | 32.19136 | 23.9201  | 19.87402 | 18.93997 | 24.01119 | 18.34113 | 18.54867 | 47.01725 | 55.87403 | 34.18492 | -0.76665 | 0.021164 | -0.8122  | 0.023126 | 0.254947  | 0.685451 |
| AT4G24150 | GRF8      | 16.64466 | 10.70548 | 12.87654 | 17.32145 | 15.89921 | 6.977885 | 7.114428 | 11.86779 | 7.809968 | 19.19071 | 21.28534 | 10.35907 | 0.031461 | 0.960373 | -0.50891 | 0.368852 | 0.261589  | NA       |
| AT4G24160 | AT4G24160 | 133.9583 | 153.4452 | 164.8198 | 183.5249 | 194.7654 | 230.2702 | 232.444  | 212.5413 | 226.4891 | 108.4275 | 117.0694 | 125.3447 | 0.419361 | 0.018847 | 0.580863 | 0.001081 | -0.34913  | 0.229911 |
| AT4G24170 | AT4G24170 | 5.94452  | 7.136984 | 1.287654 | 1.649662 | 3.974804 | 1.993682 | 7.114428 | 5.39445  | 2.928738 | 0.959536 | 5.321336 | 1.035907 | -0.54856 | 0.437478 | 1.18616  | 0.890358 | -0.58904  | NA       |
| AT4G24175 | AT4G24175 | 45.17835 | 39.25341 | 45.0679  | 51.13953 | 49.02258 | 47.84836 | 48.02239 | 43.1556  | 64.43224 | 59.49121 | 61.19536 | 65.26211 | 0.177112 | 0.573062 | 0.243528 | 0.458623 | 0.487729  | 0.243086 |
| AT4G24180 | TLP1      | 2.377808 | 0        | 3.862963 | 2.062078 | 1.324935 | 0        | 1.07889  | 0.976246 | 1.919071 | 2.660668 | 2.071813 | 0        | -0.35013 | 0.643942 | -0.62319 | 0.392268 | 0.011448  | NA       |
| AT4G24190 | SHD       | 3217.174 | 318.8662 | 2750.43  | 8359.664 | 8096.013 | 8030.549 | 5574.154 | 6134.568 | 5150.674 | 2407.475 | 2366.664 | 2622.915 | 1.418932 | 5.9E-44  | 0.884506 | 2.05E-17 | -0.29387  | 0.557796 |
| AT4G24200 | AT4G24200 | 199.7359 | 176.6406 | 146.7926 | 128.2612 | 129.1819 | 169.4629 | 149.403  | 123.9832 | 148.728  | 145.0064 | 145.0269 |          |          |          |          |          |           |          |

|           |           |          |          |          |          |          |          |          |          |          |          |           |           |          |          |          |           |          |          |
|-----------|-----------|----------|----------|----------|----------|----------|----------|----------|----------|----------|----------|-----------|-----------|----------|----------|----------|-----------|----------|----------|
| AT4G24680 | MOS1      | 645.5748 | 485.3149 | 394.0222 | 319.6221 | 287.5108 | 351.8848 | 309.4776 | 432.6349 | 315.3275 | 420.2766 | 436.3495  | 373.9623  | -0.65447 | 0.001198 | -0.5171  | 0.0154    | -0.30337 | 0.372073 |
| AT4G24690 | AT4G24690 | 1911.758 | 2085.784 | 1653.348 | 3017.232 | 2764.476 | 3184.906 | 3354.453 | 4080.362 | 3740.975 | 1406.679 | 1367.583  | 1422.3    | 0.659932 | 7.13E-08 | 0.97442  | 0.58E-16  | -0.42229 | 0.009582 |
| AT4G24700 | AT4G24700 | 66.57862 | 82.07532 | 68.24568 | 52.37678 | 54.32232 | 28.90838 | 39.12935 | 26.97225 | 46.85981 | 76.76285 | 91.79304  | 95.3034   | -0.60197 | 0.036226 | -0.87019 | 0.00332   | -0.27776 | 0.988932 |
| AT4G24710 | AT4G24710 | 27.34479 | 21.41095 | 19.31482 | 31.34358 | 27.16116 | 21.9305  | 24.9005  | 22.65669 | 20.50117 | 42.21957 | 21.28534  | 37.29264  | 0.231924 | 0.584725 | -0.01053 | 0.984332  | 0.528924 | 0.376518 |
| AT4G24730 | NR3.2     | 116.5126 | 103.4863 | 100.437  | 111.3522 | 111.957  | 134.5735 | 140.51   | 108.9679 | 138.6269 | 98.83217 | 139.6851  | 109.8066  | 0.140804 | 0.572194 | 0.268208 | 0.272337  | 0.10217  | 0.833784 |
| AT4G24740 | AF2       | 42.0609  | 540.6265 | 539.5272 | 631.8207 | 592.9082 | 645.9528 | 575.3794 | 652.7284 | 537.9115 | 544.0567 | 490.8932  | 480.6601  | 0.315677 | 0.032596 | 0.233255 | 0.151653  | 0.017605 | 0.965111 |
| AT4G24750 | STR11     | 487.6885 | 915.3182 | 964.4531 | 688.3216 | 728.0515 | 649.9402 | 697.2139 | 681.8584 | 894.2413 | 1057.408 | 1060.276  | 1101.169  | -0.39406 | 0.003947 | -0.25888 | 0.083056  | 0.236860 | 0.274381 |
| AT4G24760 | AT4G24760 | 154.5575 | 130.25   | 155.8062 | 162.4917 | 151.0425 | 134.5735 | 93.37687 | 127.309  | 153.2706 | 142.9708 | 111.7481  | 177.14    | 0.024268 | 0.938908 | -0.23667 | 0.392756  | -0.02697 | 0.965616 |
| AT4G24770 | CP31A     | 6851.653 | 7545.576 | 7244.343 | 4399.649 | 4807.525 | 4480.799 | 4729.316 | 5411.712 | 7277.914 | 8513     | 8438.308  | 6970.615  | -0.64913 | 4.81E-05 | -0.30755 | 0.085679  | 0.142074 | 0.652681 |
| AT4G24780 | AT4G24780 | 1004.624 | 1190.092 | 1149.875 | 902.3653 | 731.3639 | 773.5484 | 629.6269 | 658.1229 | 472.5031 | 968.1714 | 972.4741  | 943.7108  | -0.46383 | 0.002568 | -0.91028 | 7.04E-10  | -0.209   | 0.431857 |
| AT4G24790 | F22K18.10 | 214.0027 | 192.6986 | 184.1336 | 85.78244 | 92.74542 | 124.6051 | 128.0597 | 105.7312 | 81.02842 | 203.4216 | 186.2468  | 166.781   | -0.95461 | 3.35E-06 | -0.87858 | 3.79E-05  | -0.08441 | 0.863606 |
| AT4G24800 | AT4G24800 | 1628.798 | 1693.249 | 1372.64  | 820.707  | 745.2757 | 786.5074 | 714.1107 | 839.3764 | 729.2558 | 1432.587 | 1446.073  | 1385.007  | -0.98493 | 9.5E-18  | -1.02952 | 6.33E-19  | -0.13643 | 0.543164 |
| AT4G24805 | AT4G24805 | 97.49012 | 105.2705 | 81.12222 | 96.91766 | 84.13334 | 90.71251 | 80.92662 | 104.6523 | 146.4369 | 104.5894 | 109.0874  | 81.83662  | -0.05237 | 0.873144 | 0.22064  | 0.466432  | 0.058034 | 0.927039 |
| AT4G24810 | AT4G24810 | 253.2365 | 248.0102 | 216.3259 | 236.3141 | 240.4756 | 230.2702 | 449.0983 | 408.8993 | 313.375  | 280.1844 | 317.9498  | 291.0897  | -0.01957 | 0.934651 | 0.695929 | 2.64E-05  | 0.301903 | 0.268433 |
| AT4G24820 | RPN7      | 753.3475 | 731.5409 | 728.8124 | 828.1305 | 869.1571 | 880.2104 | 748.7935 | 839.3764 | 973.3173 | 616.9814 | 554.7493  | 624.6516  | 0.215508 | 0.116559 | 0.207058 | 0.153996  | -0.29679 | 0.121738 |
| AT4G24830 | AT4G24830 | 543.3291 | 438.9245 | 445.5284 | 374.0609 | 343.158  | 356.869  | 323.7065 | 311.7992 | 347.5436 | 460.5771 | 383.1362  | 522.0969  | -0.40645 | 0.009558 | -0.53284 | 0.000734  | -0.06298 | 0.861835 |
| AT4G24840 | AT4G24840 | 319.8152 | 299.7533 | 276.8457 | 277.5557 | 241.1381 | 289.0388 | 314.8134 | 302.0892 | 210.8691 | 266.7509 | 252.7635  | 303.5260  | -0.1488  | 0.485196 | -0.11253 | 0.633271  | -0.11913 | 0.756194 |
| AT4G24860 | AT4G24860 | 8.322328 | 8.92123  | 6.438272 | 9.073143 | 7.949607 | 13.95577 | 16.00746 | 14.02557 | 10.73871 | 10.55489 | 5.321336  | 7.251346  | 0.280068 | 0.635209 | 0.656158 | 0.239076  | -0.0012  | NA       |
| AT4G24880 | AT4G24880 | 110.5681 | 108.839  | 100.437  | 130.3233 | 123.8814 | 133.5767 | 116.4988 | 104.6523 | 92.74337 | 112.2657 | 119.7301  | 90.12387  | 0.271099 | 0.197525 | -0.02374 | 0.934729  | 0.0054   | 0.992795 |
| AT4G24890 | PAP24     | 0        | 0        | 0        | 0.412416 | 0.662467 | 0.996841 | 1.07889  | 0        | 0.99536  | 0        | 0.1035907 | 0         | 0.32815  | NA       | 0.633558 | NA        | 0.353319 | NA       |
| AT4G24900 | TTL       | 114.1348 | 112.4007 | 83.69153 | 128.6737 | 117.2567 | 120.6177 | 130.7276 | 115.4412 | 101.5296 | 154.4852 | 175.6041  | 141.1992  | 0.24125  | 0.278159 | 0.165552 | 0.514195  | 0.589058 | 0.025933 |
| AT4G24910 | AT4G24910 | 11.88904 | 14.27397 | 10.31023 | 19.13835 | 12.86142 | 11.96209 | 14.22886 | 15.10446 | 7.809968 | 13.4335  | 19.95501  | 15.5386   | 0.514539 | 0.29173  | 0.028233 | 0.951617  | 0.358378 | NA       |
| AT4G24920 | SEC61G2   | 237.7808 | 280.1266 | 275.558  | 1272.302 | 1328.247 | 935.0367 | 621.6231 | 583.6795 | 1331.6   | 238.9244 | 254.0938  | 305.5924  | 2.046955 | 1.73E-15 | 1.589942 | 1.33E-09  | 0.009111 | 0.990721 |
| AT4G24930 | AT4G24930 | 391.1494 | 447.8458 | 414.6247 | 287.8661 | 327.9213 | 245.228  | 405.5224 | 422.9249 | 554.5077 | 552.6295 | 595.9896  | 458.9606  | -0.52428 | 0.003698 | 0.14099  | 0.52624   | 0.352393 | 0.197759 |
| AT4G24940 | SAE1A     | 241.3475 | 251.5787 | 258.8185 | 313.4358 | 346.4704 | 372.8185 | 310.3669 | 270.8014 | 250.8952 | 230.2886 | 226.1568  | 251.7253  | 0.446445 | 0.003029 | 0.464645 | 0.43451   | -0.08281 | 0.808803 |
| AT4G24950 | AT4G24950 | 0        | 0        | 0        | 0        | 0        | 0        | 0        | 0        | 0        | 0        | 0         | 0         | #N/A     | #N/A     | #N/A     | #N/A      | #N/A     | #N/A     |
| AT4G24960 | HVA22D    | 114.1348 | 155.2294 | 162.2444 | 289.1033 | 278.2363 | 173.4503 | 172.5249 | 188.8057 | 204.0354 | 183.2713 | 162.3007  | 137.7756  | 0.766794 | 0.000736 | 0.379222 | 0.145909  | 0.162493 | 0.737309 |
| AT4G24970 | AT4G24970 | 58.25629 | 67.80135 | 66.95803 | 90.31901 | 73.53387 | 99.68408 | 67.58706 | 76.60119 | 82.98091 | 64.28889 | 29.26735  | 68.36983  | 0.428835 | 0.139527 | 0.226041 | 0.508168  | -0.21223 | 0.711019 |
| AT4G24972 | TPD1      | 173.58   | 192.6986 | 202.1617 | 113.0019 | 129.1811 | 103.6714 | 128.0597 | 115.4412 | 133.7457 | 195.7453 | 215.5141  | 161.6014  | -0.69415 | 9.18E-05 | -0.57419 | 0.002336  | 0.009068 | 0.986843 |
| AT4G24973 | AT4G24973 | 0        | 0        | 0        | 0        | 0        | 0        | 0        | 0        | 0        | 0        | 0         | 0         | #N/A     | #N/A     | #N/A     | #N/A      | #N/A     | #N/A     |
| AT4G24974 | AT4G24974 | 0        | 0        | 0        | 0        | 0        | 0        | 0        | 0        | 0        | 0        | 0         | 0         | #N/A     | #N/A     | #N/A     | #N/A      | #N/A     | #N/A     |
| AT4G24975 | AT4G24975 | 0        | 0        | 0        | 0        | 0        | 0        | 0.889303 | 0        | 0        | 0        | 0         | 0         | 0        | NA       | 0.160764 | NA        | 0        | NA       |
| AT4G24977 | AT4G24977 | 0        | 0        | 0        | 0        | 0        | 0        | 0        | 0        | 0        | 0        | 0         | 0         | #N/A     | #N/A     | #N/A     | #N/A      | #N/A     | #N/A     |
| AT4G24980 | AT4G24980 | 0        | 0        | 0        | 0        | 0        | 0        | 0        | 0        | 0        | 0        | 0         | 0         | #N/A     | #N/A     | #N/A     | #N/A      | #N/A     | #N/A     |
| AT4G24990 | MUB3      | 299.6038 | 406.8081 | 379.858  | 590.1667 | 635.3061 | 542.2814 | 602.9478 | 444.5027 | 588.6763 | 342.5542 | 367.1722  | 418.5062  | 0.69503  | 0.000041 | 0.585412 | 0.000884  | 0.058384 | 0.889374 |
| AT4G25000 | AMY1      | 22.58917 | 32.11643 | 34.76667 | 230.1279 | 194.7654 | 183.4187 | 244.5585 | 219.0147 | 219.6553 | 13.31211 | 18.62468  | 12.43088  | 2.67417  | 6.18E-31 | 2.829457 | 3E-34     | -0.8142  | 0.06913  |
| AT4G25010 | SWEET14   | 0        | 1.784246 | 0        | 0        | 0.662467 | 0        | 0        | 0        | 0        | 0.193107 | 0         | 0.2701813 | -0.18296 | NA       | -0.29412 | NA        | 0.387104 | NA       |
| AT4G25020 | AT4G25020 | 36.85602 | 28.54794 | 21.89012 | 16.08421 | 18.54908 | 21.9305  | 15.12816 | 19.42002 | 15.61994 | 18.23118 | 29.26735  | 33.14901  | -0.599   | 0.119131 | -0.72952 | 0.474075  | -0.11702 | 0.892499 |
| AT4G25030 | AT4G25030 | 466.0503 | 458.0515 | 460.8083 | 649.9669 | 626.694  | 626.694  | 735.6585 | 671.4241 | 759.5385 | 938.1274 | 98.2339   | 541.4459  | 0.5264   | 0.00143  | 0.759272 | 0.243E-06 | 0.023277 | 0.95979  |
| AT4G25040 | AT4G25040 | 0        | 0        | 0        | 0        | 0.996841 | 0        | 0        | 0        | 0        | 0        | 0         | 0.1035907 | 0.134822 | NA       | 0        | NA        | 0.152581 | NA       |
| AT4G25050 | ACP4      | 3616.646 | 4150.156 | 3985.29  | 2733.903 | 2278.887 | 2644.619 | 2032.948 | 2439.37  | 3302.64  | 5318.706 | 4923.566  | 4144.662  | -0.60422 | 0.000794 | -0.58286 | 0.001514  | 0.2858   | 0.334141 |
| AT4G25070 | AT4G25070 | 11.88904 | 17.84246 | 9.01358  | 144.7579 | 143.0929 | 118.6241 | 52.46891 | 50.70783 | 40.02609 | 5.757214 | 9.312338  | 9.323159  | 3.2112   | 1.88E-25 | 1.73798  | 2.28E-07  | -0.52696 | 0.471724 |
| AT4G25080 | CHLM      | 3229.063 | 3556.002 | 3514.009 | 2116.517 | 2092.734 | 1977.732 | 2104.092 | 2152.385 | 2870.163 | 3270.097 | 3081.053  | 3476.502  | -0.72522 | 4.48E-08 | -0.52421 | 0.000141  | -0.06621 | 0.833784 |
| AT4G25090 | RBOHG     | 0        | 1.287654 | 0        | 0        | 1.993682 | 0        | 0.889303 | 0        | 0        | 0        | 0         | 0         | 0.077544 | NA       | -0.05659 | NA        | -0.20231 | NA       |
| AT4G25100 | FSD1      | 4157.597 | 3900.362 | 4477.174 | 3232.926 | 3695.905 | 3398.23  | 2738.165 | 2535.391 | 3621.873 | 3568.513 | 3250.006  | 5845.621  | -0.27118 | 0.25424  | -0.47974 | 0.035494  | 0.014429 | 0.982596 |
| AT4G25110 | AMC2      | 24.96698 | 33.90067 | 32.19136 | 158.78   | 147.7302 | 144.5419 | 52.46891 | 40.99782 | 45.88356 | 7.676285 | 6.65167   | 13.46678  | 2.250191 | 9.72E-05 | 0.598927 | 0.053708  | -1.44038 | 0.00651  |
| AT4G25120 | SRS2      | 110.5681 | 67.80135 | 84.98519 | 50.3147  | 54.98478 | 84.73147 | 43.57587 | 38.84004 | 33.19236 | 50.85539 | 75.82904  | 62.15439  | -0.48386 | 0.100856 | -1.12808 | 0.000102  | -0.47748 | 0.297444 |
| AT4G25130 | MSR4      | 743.065  | 792.2052 | 706.9222 | 655.7408 | 736.0011 | 638.9749 | 707.8586 | 838.2975 | 991.8659 | 775.3048 | 963.1618  | 818.3662  | -0.13897 | 0.446998 | 0.176685 | 0.340947  | 0.185916 | 0.509208 |
| AT4G25140 | OEO1      | 0        | 0        | 0        | 0.662467 | 0        | 0        | 0        | 0        | 0        | 0        | 0         | 0         | 0.128567 | NA       | 0        | NA        | 0        | NA       |
| AT4G25150 | AT4G25150 | 43.98945 | 26.76369 | 45.0679  | 53.20161 | 45.04777 | 29.90522 | 30.23632 | 36.68226 | 33.19236 | 46.05771 | 54.54369  | 53.86714  | -0.14451 | 0.701511 | -0.22615 | 0.56791   | 0.360518 | 0.51272  |
| AT4G25160 | PUB35     | 11.88904 | 5.352738 | 10.30123 | 3.299325 | 1.324935 | 2.99052  | 2.66791  | 1.07889  | 5.857476 | 6.635821 | 5.321336  | 7.251346  | -1.33247 | 0.020911 | -1.09064 | 0.079413  | -0.29489 | NA       |
| AT4G25170 | AT4G25170 | 550.4625 | 560.2533 | 480.2951 | 946.0813 | 969.8521 | 903.1377 | 946.2189 | 1120.967 | 1209.569 | 485.525  | 482.9112  | 498.271   | 0.81838  | 5.53E-11 | 0.136113 | 7.55E-17  | -0.11404 | 0.669944 |
| AT4G25180 | AT4G25    |          |          |          |          |          |          |          |          |          |          |           |           |          |          |          |           |          |          |

|           |           |          |          |          |          |          |          |          |          |          |          |          |          |          |          |          |          |          |          |
|-----------|-----------|----------|----------|----------|----------|----------|----------|----------|----------|----------|----------|----------|----------|----------|----------|----------|----------|----------|----------|
| AT4G25630 | MED36A    | 370.938  | 353.2807 | 442.9531 | 301.8882 | 322.6216 | 288.087  | 235.6654 | 175.8591 | 230.3941 | 355.0282 | 307.3071 | 347.0287 | -0.35026 | 0.033208 | -0.84653 | 8.25E-08 | -0.20624 | 0.468217 |
| AT4G25631 | U60.2F    | 1.188904 | 0        | 0        | 0.412416 | 1.987402 | 0        | 0        | 3.23667  | 1.952492 | 0.959536 | 1.330334 | 2.071813 | 0.134128 | 0.860388 | 0.511802 | 0.463622 | 0.418478 | NA       |
| AT4G25635 | AT4G25635 | 0        | 0        | 0        | 0        | 0        | 0        | 0        | 0        | 0        | 0        | 0        | 0        | NA       | NA       | NA       | NA       | NA       | NA       |
| AT4G25640 | ADTX35    | 498.1508 | 636.9758 | 643.8272 | 889.168  | 824.1093 | 910.1156 | 875.9639 | 891.1631 | 814.1892 | 495.1204 | 529.4729 | 525.2046 | 0.557554 | 1.16E-05 | 0.534745 | 3.78E-05 | -0.19369 | 0.396802 |
| AT4G25650 | PTC52     | 1103.303 | 1218.64  | 1021.11  | 915.1502 | 810.1975 | 959.5797 | 1203.228 | 1300.062 | 1014.32  | 1161.998 | 1081.562 | 1102.205 | -0.31139 | 0.026463 | 0.074041 | 0.677156 | 0.00344  | 0.992945 |
| AT4G25660 | AT4G25660 | 279.3924 | 246.226  | 287.1469 | 308.0744 | 292.8105 | 292.0743 | 290.8022 | 301.0103 | 281.1588 | 329.1207 | 304.6465 | 278.6589 | 0.130189 | 0.41706  | 0.094871 | 0.559873 | 0.159244 | 0.538195 |
| AT4G25670 | AT4G25670 | 0        | 0        | 0        | 1.237247 | 0        | 0.996841 | 0.889303 | 0        | 0        | 0        | 0        | 0        | 0.388076 | NA       | 0.146596 | NA       | 0        | NA       |
| AT4G25672 | CPuORF12  | 0        | 0        | 0        | 0        | 0        | 0        | 0        | 0        | 0        | 0        | 0        | 0        | NA       | NA       | NA       | NA       | NA       | NA       |
| AT4G25680 | AT4G25680 | 223.5139 | 255.1472 | 229.2025 | 213.6313 | 201.3901 | 179.4313 | 176.0821 | 180.1746 | 203.0592 | 262.9128 | 290.0128 | 223.7558 | -0.23418 | 0.188087 | -0.32865 | 0.070699 | 0.133015 | 0.683683 |
| AT4G25690 | AT4G25690 | 0        | 0        | 0        | 0        | 0        | 0        | 0        | 0        | 0        | 0        | 0        | 0        | NA       | NA       | NA       | NA       | NA       | NA       |
| AT4G25692 | CPuORF13  | 0        | 0        | 0        | 0        | 0        | 0        | 0        | 0        | 0        | 0        | 0        | 0        | NA       | NA       | NA       | NA       | NA       | NA       |
| AT4G25700 | ETA-OHASE | 231.8363 | 230.1677 | 215.0383 | 164.5538 | 130.5061 | 161.4882 | 168.9677 | 189.8846 | 195.2492 | 270.589  | 263.4061 | 232.0431 | -0.55675 | 0.000643 | -0.28464 | 0.124825 | 0.175808 | 0.561641 |
| AT4G25707 | AT4G25707 | 5.94452  | 7.136984 | 6.438272 | 7.011065 | 3.312336 | 5.981045 | 2.66791  | 7.55223  | 0.976246 | 5.757214 | 1.330334 | 4.143626 | -0.14729 | 0.845603 | -0.54851 | 0.443356 | -0.48707 | NA       |
| AT4G25710 | AT4G25710 | 97.49012 | 74.93833 | 90.1358  | 54.85127 | 62.93439 | 62.80097 | 54.24751 | 62.57562 | 73.21845 | 79.64146 | 65.18636 | 67.33392 | -0.54359 | 0.0191   | -0.46403 | 0.066714 | -0.3021  | 0.459244 |
| AT4G25719 | AT4G25719 | 1.188904 | 3.568492 | 0        | 2.062078 | 2.649869 | 1.993682 | 1.778607 | 2.15778  | 1.952492 | 1.919071 | 2.660668 | 2.071813 | 0.299051 | 0.700716 | 0.185578 | 0.830443 | 0.269308 | NA       |
| AT4G25720 | QCT       | 59.4452  | 80.29107 | 72.10864 | 142.6958 | 115.2693 | 142.5482 | 128.0597 | 128.3879 | 123.007  | 78.68192 | 82.48071 | 99.44703 | 0.905311 | 1.03E-05 | 0.828266 | 0.00011  | 0.302127 | 0.436537 |
| AT4G25730 | AT4G25730 | 575.4295 | 545.9827 | 466.1309 | 384.3713 | 401.4552 | 377.8027 | 445.541  | 513.5516 | 465.6693 | 434.6696 | 383.1362 | 388.4649 | -0.36233 | 0.010664 | -0.0757  | 0.680284 | -0.30957 | 0.141234 |
| AT4G25740 | RPS10A    | 813.2103 | 799.3422 | 830.5371 | 1004.644 | 910.8925 | 750.6211 | 678.5386 | 695.884  | 1037.749 | 1075.639 | 1153.4   | 823.5457 | 0.124443 | 0.605194 | -0.01817 | 0.949656 | 0.312068 | 0.334593 |
| AT4G25750 | ABC6A     | 8.322328 | 3.568492 | 15.45185 | 2.474493 | 3.974804 | 8.971567 | 3.557214 | 6.47334  | 4.88123  | 1.919071 | 3.991002 | 5.179533 | -0.70298 | 0.260712 | -0.66485 | 0.322776 | -0.93414 | NA       |
| AT4G25760 | GU02      | 7.133424 | 7.136984 | 10.30123 | 10.7228  | 3.974804 | 6.977885 | 2.66791  | 2.15778  | 2.928738 | 4.797678 | 7.982004 | 5.179533 | -0.08683 | 0.905144 | -1.11954 | 0.070114 | -0.35928 | NA       |
| AT4G25770 | AT4G25770 | 156.9533 | 240.8732 | 236.9284 | 185.9994 | 176.2163 | 215.3176 | 193.8682 | 180.1746 | 193.2967 | 202.462  | 203.5411 | 192.6786 | -0.12959 | 0.557424 | -0.14777 | 0.525592 | -0.0733  | 0.866496 |
| AT4G25780 | AT4G25780 | 27.34479 | 14.27397 | 21.89012 | 2.062078 | 5.299738 | 1.993682 | 7.114428 | 4.31556  | 6.833722 | 38.38143 | 25.27635 | 32.1131  | -0.2614  | 4.28E-07 | -1.51331 | 0.001113 | 0.540202 | NA       |
| AT4G25790 | AT4G25790 | 0        | 0        | 0        | 0        | 0        | 0        | 1.07889  | 0.976246 | 0.959536 | 1.330334 | 0        | 0        | 0        | NA       | 0.369738 | NA       | 0.397533 | NA       |
| AT4G25800 | CBP60D    | 83.22328 | 78.50683 | 50.21852 | 71.34789 | 78.83361 | 88.17883 | 61.36194 | 62.57562 | 60.52725 | 41.26003 | 55.87403 | 46.61579 | 0.161422 | 0.58176  | -0.18699 | 0.555888 | -0.54057 | 0.173132 |
| AT4G25810 | XTH23     | 7.133424 | 21.41095 | 12.87654 | 80.42104 | 68.8966  | 132.5798 | 80.92662 | 98.17898 | 133.5427 | 11.51443 | 25.27635 | 17.61041 | 2.484666 | 6.6E-12  | 2.633968 | 3.66E-13 | 0.321093 | 0.699093 |
| AT4G25820 | XTH14     | 0        | 0        | 0        | 0.824831 | 0        | 0        | 0.889303 | 0        | 0        | 0        | 0        | 0        | 0.133287 | NA       | 0.125963 | NA       | 0        | NA       |
| AT4G25830 | AT4G25830 | 67.76752 | 73.15409 | 68.24568 | 54.43886 | 48.36011 | 50.83888 | 31.12562 | 38.84004 | 49.78855 | 60.45074 | 77.15937 | 101.5188 | -0.41586 | 0.14243  | -0.76163 | 0.007892 | 0.188434 | 0.725981 |
| AT4G25835 | AT4G25835 | 46.36725 | 58.88012 | 46.35556 | 77.94654 | 105.3323 | 79.74726 | 88.93035 | 79.83786 | 130.817  | 48.93632 | 38.57969 | 45.57989 | 0.768305 | 0.00475  | 0.949089 | 0.000501 | -0.15669 | 0.803737 |
| AT4G25840 | GGP1      | 65.38972 | 62.44861 | 59.2321  | 106.8156 | 107.9822 | 93.70303 | 67.58706 | 73.36452 | 75.17094 | 47.01725 | 45.23135 | 62.15439 | 0.707694 | 0.001388 | 0.197433 | 0.493693 | -0.26078 | 0.563916 |
| AT4G25845 | AT4G25845 | 1.188904 | 0        | 0        | 0.412416 | 0        | 0.662467 | 0        | 0.889303 | 1.07889  | 0        | 0        | 0        | -0.02127 | NA       | 0.12795  | NA       | -0.25511 | NA       |
| AT4G25850 | ORP4B     | 13.07794 | 21.41095 | 9.01358  | 5.361402 | 3.974804 | 4.984204 | 8.003731 | 5.39445  | 0.976246 | 17.27164 | 15.96401 | 10.35907 | -1.2304  | 0.016951 | -1.1896  | 0.030824 | 0.045915 | NA       |
| AT4G25860 | ORP4A     | 2.377808 | 0        | 0        | 0.412416 | 1.324935 | 0.996841 | 0        | 0        | 0        | 1.330334 | 2.071813 | 0        | 0.03068  | NA       | -0.47739 | NA       | 0.171155 | NA       |
| AT4G25870 | AT4G25870 | 173.58   | 151.6609 | 151.9432 | 188.4739 | 174.8914 | 140.5545 | 156.5174 | 115.4412 | 152.2944 | 151.6066 | 143.6761 | 152.2783 | 0.085575 | 0.719982 | -0.16516 | 0.489174 | -0.09424 | 0.835496 |
| AT4G25880 | AUPUM6    | 584.9407 | 595.9382 | 565.2803 | 619.4482 | 612.1198 | 612.0602 | 659.8632 | 772.4852 | 577.9376 | 511.4325 | 327.2622 | 527.2764 | 0.077317 | 0.739266 | 0.198712 | 0.359014 | -0.34126 | 0.233811 |
| AT4G25885 | AT4G25885 | 0        | 0        | 0        | 0        | 0        | 0        | 0        | 0        | 0        | 0        | 0        | 0        | NA       | NA       | NA       | NA       | NA       | NA       |
| AT4G25890 | RPP3A     | 185.469  | 167.7191 | 150.6556 | 104.7536 | 110.632  | 83.73463 | 62.25124 | 52.86561 | 155.2231 | 178.4736 | 148.9974 | 215.4686 | -0.69678 | 0.031942 | -0.83406 | 0.011565 | 0.103113 | 0.889374 |
| AT4G25900 | AT4G25900 | 318.6263 | 488.8834 | 423.6383 | 1004.644 | 913.5424 | 1015.781 | 964.8943 | 898.7153 | 821.0229 | 212.0574 | 199.5501 | 269.3357 | 1.235283 | 3.23E-14 | 1.109551 | 1.67E-11 | -0.82437 | 6.43E-05 |
| AT4G25910 | NIFU3     | 223.5139 | 255.1472 | 247.2296 | 200.0216 | 159.6546 | 175.444  | 289.1229 | 223.3302 | 300.6838 | 201.5025 | 202.2108 | 283.8384 | -0.42179 | 0.037407 | 0.166039 | 0.489375 | -0.07132 | 0.878139 |
| AT4G25920 | AT4G25920 | 1.188904 | 0        | 0        | 1.237247 | 0        | 0        | 1.778607 | 0        | 0        | 0        | 0        | 0        | -0.0665  | NA       | 0.461465 | NA       | -0.04769 | NA       |
| AT4G25930 | AT4G25930 | 0        | 0        | 0        | 0        | 0        | 0        | 0        | 0        | 0        | 0        | 0        | 0        | 0        | NA       | 0        | NA       | 0.172362 | NA       |
| AT4G25940 | AT4G25940 | 520.7567 | 428.219  | 328.3519 | 633.0579 | 582.9712 | 657.9149 | 612.7301 | 641.9395 | 517.4104 | 214.936  | 369.8328 | 255.9407 | 0.743897 | 0.000105 | 0.665218 | 0.000763 | -0.38632 | 0.212567 |
| AT4G25950 | VHA-G3    | 5.94452  | 3.568492 | 5.150617 | 1.237247 | 4.637271 | 1.993682 | 1.778607 | 2.15778  | 3.904984 | 7.676285 | 11.97301 | 11.39497 | -0.65682 | 0.315561 | -0.59323 | 0.405331 | 0.810709 | NA       |
| AT4G25960 | ABD8C     | 666.9751 | 792.2052 | 732.6753 | 354.265  | 312.0221 | 456.5531 | 313.9241 | 365.7437 | 323.3465 | 533.5018 | 562.7313 | 591.5026 | -0.94563 | 1.8E-07  | -1.23381 | 8.89E-12 | -0.36682 | 0.208131 |
| AT4G25970 | SDC3      | 1021.268 | 1025.941 | 1039.137 | 1021.141 | 1067.235 | 1173.282 | 1422.886 | 1368.032 | 1021.903 | 1126.795 | 981.0035 | 0        | 0.076421 | 0.580786 | 0.382007 | 0.000949 | 0.018405 | 0.952813 |
| AT4G25980 | PER43     | 4.755616 | 8.92123  | 6.438272 | 9.073143 | 8.612075 | 3.987363 | 11.56095 | 4.31556  | 12.6912  | 12.47396 | 6.65167  | 7.251346 | 0.138826 | 0.814388 | 0.423745 | 0.519227 | 0.334715 | NA       |
| AT4G25990 | CIL       | 46.36725 | 46.3904  | 37.34198 | 43.71605 | 45.71024 | 50.83888 | 39.12935 | 33.44559 | 44.90372 | 29.74536 | 31.92802 | 39.36445 | 0.098928 | 0.77973  | -0.13097 | 0.732005 | -0.33754 | 0.525791 |
| AT4G26000 | PEP       | 208.0582 | 203.404  | 191.8605 | 264.7708 | 238.4882 | 257.1849 | 324.5958 | 303.1681 | 195.2492 | 203.4216 | 188.9074 | 212.3608 | 0.32613  | 0.118295 | 0.437152 | 0.037264 | 0.004849 | 0.992945 |
| AT4G26005 | AT4G26005 | 1.188904 | 0        | 0        | 0        | 0        | 0        | 0        | 0        | 0        | 0        | 0        | 0        | -0.02106 | NA       | -0.03092 | NA       | -0.19245 | NA       |
| AT4G26010 | PER44     | 2.377808 | 0        | 1.287654 | 2.062078 | 3.974804 | 1.993682 | 3.557214 | 3.23667  | 0.952492 | 2.878607 | 1.330334 | 3.10772  | 0.454923 | 0.536463 | 0.520613 | 0.495249 | 0.387607 | NA       |
| AT4G26020 | AT4G26020 | 1.188904 | 3.568492 | 1.287654 | 4.948987 | 4.637271 | 0.996841 | 1.778607 | 1.07889  | 1.952492 | 1.919071 | 3.991002 | 7.251346 | 0.53388  | 0.458144 | -0.13209 | 0.881556 | 0.656242 | NA       |
| AT4G26030 | AT4G26030 | 0        | 3.568492 | 1.287654 | 0        | 0        | 1.07889  | 0        | 1.07889  | 0        | 0        | 1.330334 | 1.035907 | -0.79769 | NA       | -0.50783 | NA       | -0.28366 | NA       |
| AT4G26040 | AT4G26040 | 0        | 0        | 0        | 0        | 0        | 0.996841 | 0        | 0        | 0        | 0        | 0        | 0        | 0.15625  | NA       | 0.00579  | NA       | 0        | NA       |
| AT4G26050 | PIRL8     | 1.188904 | 3.568492 | 1.287654 | 4.536571 | 9.937009 | 4.984204 | 7.114428 | 11.86779 | 14.64369 | 0.959536 | 3.991002 | 3.10772  | 1.03347  | 0.095247 | 1.650604 | 0.005796 | 0.166314 | NA       |
| AT4G26055 | AT4G26055 | 2.377808 | 0        | 1.287654 | 5.773818 | 3.974804 | 1.993682 | 0.889303 | 1.07889  | 4.88123  | 0        | 1.330334 | 3.10772  | 0.803706 | 0.240362 | 0.302609 | 0.71     |          |          |

|           |           |          |          |          |          |          |          |          |          |          |          |          |          |          |          |          |          |          |          |
|-----------|-----------|----------|----------|----------|----------|----------|----------|----------|----------|----------|----------|----------|----------|----------|----------|----------|----------|----------|----------|
| AT4G26480 | AT4G26480 | 376.8826 | 397.8869 | 343.8037 | 334.469  | 327.2588 | 420.6668 | 367.2823 | 414.2937 | 392.4509 | 350.2305 | 259.4151 | 353.2441 | -0.05033 | 0.819092 | 0.070014 | 0.759144 | -0.20455 | 0.502753 |
| AT4G26483 | AT4G26483 | 0        | 0        | 0        | 0        | 0        | 0        | 0        | 0        | 0        | 0        | 0        | 0        | #N/A     | #N/A     | #N/A     | #N/A     | #N/A     | #N/A     |
| AT4G26485 | AT4G26485 | 0        | 0        | 0        | 0        | 0        | 0        | 0        | 0        | 0        | 0        | 0        | 0        | #N/A     | #N/A     | #N/A     | #N/A     | #N/A     | #N/A     |
| AT4G26488 | AT4G26488 | 3.566712 | 1.784246 | 0        | 2.474493 | 3.974804 | 1.993682 | 4.446517 | 2.15778  | 0.976246 | 2.878607 | 2.660668 | 3.10772  | 0.320853 | 0.676508 | 0.229358 | 0.788022 | 0.325468 | NA       |
| AT4G26490 | AT4G26490 | 0        | 0        | 0        | 0        | 1.324935 | 0.996841 | 0        | 0        | 1.952492 | 0        | 0        | 0        | 0.346977 | NA       | 0.293171 | NA       | 0        | 0.886224 |
| AT4G26500 | SUF1      | 215.1916 | 173.0719 | 182.8469 | 150.9441 | 176.8788 | 177.4377 | 177.8607 | 198.5157 | 285.0638 | 148.728  | 167.6221 | 221.684  | -0.17976 | 0.494869 | 0.200313 | 0.043797 | -0.08705 | 0.086624 |
| AT4G26510 | UKL4      | 649.4146 | 711.9142 | 715.9358 | 593.8784 | 516.7245 | 631.9971 | 657.1953 | 647.334  | 327.044  | 797.3741 | 851.4137 | 740.6372 | -0.24505 | 0.33049  | -0.33616 | 0.184716 | 0.195675 | 0.648366 |
| AT4G26520 | AT4G26520 | 329.3264 | 419.2978 | 320.6259 | 214.4561 | 181.516  | 174.4471 | 241.8905 | 242.7502 | 326.0124 | 355.6292 | 348.5475 | 364.6391 | -0.57353 | 0.408-08 | -0.53179 | 0.001762 | 0.112429 | 0.741202 |
| AT4G26530 | AT4G26530 | 4244.387 | 4728.252 | 4296.903 | 1778.748 | 1539.574 | 1465.356 | 4483.868 | 5121.491 | 6147.421 | 5930.89  | 7493.771 | 4906.053 | -1.43986 | 2.82E-18 | 0.242596 | 0.232503 | 0.456537 | 0.06115  |
| AT4G26540 | AT4G26540 | 429.1943 | 337.2225 | 280.7086 | 116.3012 | 127.1937 | 113.6398 | 128.0597 | 151.0446 | 176.7005 | 262.9128 | 377.8148 | 294.1975 | -1.50688 | 2.03E-14 | -1.16782 | 7.55E-09 | -0.16499 | 0.686445 |
| AT4G26542 | AT4G26542 | 0        | 0        | 0        | 0        | 0        | 0        | 0        | 0        | 0        | 0        | 0        | 0        | #N/A     | #N/A     | #N/A     | #N/A     | #N/A     | #N/A     |
| AT4G26550 | AT4G26550 | 84.41218 | 53.52738 | 96.57408 | 140.6337 | 151.705  | 176.4408 | 104.0485 | 101.4157 | 116.1733 | 69.08657 | 67.84703 | 68.36983 | 0.936431 | 7.98E-06 | 0.415151 | 0.092168 | -0.20951 | 0.642572 |
| AT4G26555 | FKBP16-1  | 375.6936 | 478.1779 | 464.8432 | 449.533  | 438.5533 | 408.7047 | 401.0759 | 376.5326 | 567.1989 | 586.2763 | 474.9292 | 539.7073 | -0.01922 | 0.940291 | 0.030929 | 0.905739 | 0.278418 | 0.357261 |
| AT4G26560 | CB17      | 0        | 1.784246 | 0        | 0        | 0.662467 | 0.996841 | 1.778607 | 0        | 0        | 0        | 0        | 0        | 0.007425 | NA       | 0.05609  | NA       | -0.26059 | NA       |
| AT4G26570 | CB13      | 338.8376 | 406.8081 | 430.0766 | 380.6596 | 410.0672 | 417.6763 | 368.1716 | 352.797  | 443.2157 | 346.3924 | 369.8328 | 391.5727 | 0.039284 | 0.842991 | -0.01081 | 0.961278 | -0.08229 | 0.805161 |
| AT4G26580 | AT4G26580 | 9.511232 | 3.568492 | 12.87654 | 4.536571 | 1.324935 | 1.993682 | 6.225124 | 5.39445  | 3.904984 | 6.716749 | 17.29434 | 7.251346 | -1.17119 | 0.044542 | -0.56765 | 0.39956  | 0.15604  | NA       |
| AT4G26582 | AT4G26582 | 1.188904 | 0        | 0        | 0.412416 | 0        | 0        | 0.996841 | 0        | 0        | 0        | 0        | 1.035907 | 0.025907 | NA       | -0.2451  | NA       | -0.03294 | NA       |
| AT4G26590 | OPT5      | 34.47821 | 26.76369 | 29.61605 | 37.52982 | 42.39791 | 30.90266 | 32.01493 | 34.52448 | 45.88356 | 24.94793 | 22.61568 | 38.32854 | 0.266563 | 0.474789 | 0.27167  | 0.498539 | -0.0782  | 0.927039 |
| AT4G26600 | AT4G26600 | 158.1242 | 119.5445 | 163.5321 | 114.2391 | 120.569  | 126.5988 | 113.8308 | 114.3623 | 98.60085 | 181.3522 | 137.0244 | 159.5296 | -0.29953 | 0.14285  | -0.43482 | 0.037997 | 0.107435 | 0.794445 |
| AT4G26610 | D6PK11    | 290.0926 | 367.5547 | 318.0506 | 284.9792 | 282.2111 | 291.0751 | 280.1306 | 292.3792 | 326.0662 | 298.4156 | 315.2892 | 314.9156 | -0.17511 | 0.261944 | -0.10912 | 0.54054  | -0.06288 | 0.849621 |
| AT4G26620 | AT4G26620 | 315.0595 | 308.6746 | 294.8728 | 354.265  | 312.6846 | 342.9132 | 257.0087 | 270.8014 | 322.1612 | 243.722  | 211.5231 | 173.4793 | 0.135922 | 0.44927  | -0.11057 | 0.578244 | -0.32367 | 0.181772 |
| AT4G26630 | AT4G26630 | 2651.256 | 1716.445 | 1757.648 | 1580.376 | 1860.871 | 1468.346 | 1381.978 | 1468.369 | 2868.211 | 1609.141 | 1669.569 | 1752.754 | -0.2035  | 0.288235 | -0.09529 | 0.78725  | -0.27172 | 0.565684 |
| AT4G26640 | WRKY20    | 326.9486 | 299.7533 | 294.8728 | 312.1986 | 306.7223 | 309.0206 | 266.791  | 288.0636 | 194.273  | 287.8607 | 336.5745 | 279.6948 | 0.008666 | 0.970137 | -0.29579 | 0.118593 | -0.03202 | 0.94286  |
| AT4G26650 | AT4G26650 | 354.2934 | 353.2807 | 374.7074 | 352.6153 | 374.9565 | 374.8121 | 336.1567 | 339.8503 | 350.4723 | 354.0686 | 385.7969 | 365.675  | 0.022353 | 0.892741 | -0.07681 | 0.634217 | 0.026919 | 0.933316 |
| AT4G26660 | AT4G26660 | 148.6131 | 110.6233 | 112.0259 | 138.1592 | 129.1811 | 148.5293 | 141.3993 | 129.4668 | 112.2683 | 160.2424 | 143.6761 | 146.0628 | 0.144681 | 0.519472 | 0.034615 | 0.900768 | 0.262454 | 0.432866 |
| AT4G26670 | TIM22-2   | 332.8931 | 347.928  | 363.1185 | 586.4549 | 696.9156 | 555.2403 | 712.3321 | 708.8307 | 974.2935 | 360.7854 | 427.0372 | 397.7881 | 0.801691 | 1.04E-06 | 1.175736 | 2.14E-13 | 0.177536 | 0.585012 |
| AT4G26675 | AT4G26675 | 0        | 0        | 0        | 0        | 0        | 0        | 0        | 0        | 0        | 0        | 0        | 0        | #N/A     | #N/A     | #N/A     | #N/A     | #N/A     | #N/A     |
| AT4G26680 | AT4G26680 | 28.53369 | 17.84246 | 20.60247 | 13.60971 | 6.624673 | 8.971567 | 9.782338 | 14.02557 | 8.786214 | 26.867   | 13.30334 | 19.68222 | -1.01394 | 0.019676 | -0.91575 | 0.051304 | -0.13521 | NA       |
| AT4G26690 | GDPD13    | 976.0901 | 713.6984 | 648.9778 | 345.6043 | 299.4352 | 502.4078 | 526.4983 | 630.9474 | 309.7474 | 567.0856 | 597.32   | 588.3949 | -0.99695 | 7.52E-06 | -0.86648 | 0.00015  | -0.40293 | 0.270063 |
| AT4G26700 | FIM1      | 847.6885 | 947.4346 | 938.8371 | 538.6147 | 453.1276 | 562.2182 | 775.4726 | 773.5641 | 609.1775 | 1001.755 | 968.4831 | 1026.583 | -0.80239 | 2.45E-09 | -0.33341 | 0.02605  | 0.134524 | 0.612544 |
| AT4G26701 | AT4G26701 | 0        | 0        | 0        | 0        | 0.662467 | 0        | 0.889303 | 0        | 0        | 0        | 0        | 2.660668 | 0.083313 | NA       | 0.133713 | NA       | 0.350621 | NA       |
| AT4G26710 | VHA-E2    | 316.2484 | 305.1061 | 359.2556 | 389.7327 | 429.2788 | 326.9638 | 395.74   | 283.7481 | 410.0233 | 490.3227 | 697.095  | 433.0089 | 0.218577 | 0.368197 | 0.14691  | 0.588631 | 0.698441 | 0.008897 |
| AT4G26720 | PPX1      | 191.4135 | 206.9725 | 202.1617 | 274.2564 | 245.7754 | 236.2513 | 198.3147 | 207.1469 | 215.5704 | 197.6643 | 170.2827 | 190.6068 | 0.338312 | 0.030523 | 0.050317 | 0.817287 | -0.0949  | 0.779875 |
| AT4G26730 | AT4G26730 | 0        | 0        | 0        | 0        | 0        | 0        | 0        | 0        | 0        | 0        | 0        | 0        | #N/A     | #N/A     | #N/A     | #N/A     | #N/A     | #N/A     |
| AT4G26740 | PKG1      | 0        | 0        | 0        | 0.412416 | 0        | 1.993682 | 0        | 0        | 0        | 0        | 0        | 0        | 0.374519 | NA       | 0        | NA       | 0        | NA       |
| AT4G26750 | LIP5      | 126.0238 | 99.91778 | 99.14938 | 146.4075 | 122.5564 | 156.504  | 107.6057 | 146.729  | 88.83839 | 96.9131  | 134.3637 | 76.65708 | 0.365213 | 0.178053 | 0.065551 | 0.854993 | -0.09054 | 0.88006  |
| AT4G26760 | MAP65-2   | 277.0146 | 248.0102 | 279.421  | 216.1058 | 189.4656 | 223.2923 | 178.75   | 210.3835 | 183.5342 | 273.4677 | 259.4151 | 262.0844 | -0.35691 | 0.018948 | -0.49038 | 0.001594 | -0.02027 | 0.960832 |
| AT4G26770 | CD53      | 1.188904 | 1.784246 | 0        | 0.412416 | 0        | 1.993682 | 0        | 0        | 1.07889  | 0        | 0        | 0        | -0.06293 | NA       | -0.28183 | NA       | -0.4762  | NA       |
| AT4G26780 | AR192     | 173.58   | 123.113  | 166.1074 | 197.1346 | 210.0021 | 180.4822 | 210.7649 | 181.2535 | 218.6791 | 181.3522 | 162.3007 | 198.8941 | 0.325802 | 0.085574 | 0.378327 | 0.05348  | 0.213126 | 0.522462 |
| AT4G26790 | AT4G26790 | 46.36725 | 39.25341 | 57.94445 | 20.62078 | 17.16116 | 17.94313 | 14.22886 | 7.55223  | 18.54867 | 97.8263  | 129.0424 | 66.29802 | -1.03803 | 0.00206  | -1.63098 | 4.78E-06 | 0.958059 | 0.021388 |
| AT4G26795 | AT4G26795 | 8.322338 | 5.32738  | 3.862963 | 6.186234 | 8.612075 | 3.987366 | 4.466517 | 4.31556  | 7.809968 | 5.757214 | 2.660668 | 6.215439 | 0.09032  | 0.904015 | -0.07059 | 0.930797 | -0.17224 | NA       |
| AT4G26800 | AT4G26800 | 24.96698 | 26.76369 | 25.75309 | 23.9201  | 27.16116 | 23.92418 | 27.56841 | 19.42002 | 22.45366 | 37.42189 | 33.25835 | 33.14901 | -0.0421  | 0.925506 | -0.1341  | 0.771502 | 0.401203 | 0.493509 |
| AT4G26810 | AT4G26810 | 19.02246 | 19.62671 | 30.9037  | 61.44992 | 55.64725 | 49.84204 | 33.79353 | 23.73558 | 45.88356 | 30.70514 | 14.63367 | 26.93357 | 1.165288 | 0.000567 | 0.510786 | 0.208618 | 0.060468 | 0.951161 |
| AT4G26820 | AT4G26820 | 0        | 0        | 1.287654 | 0        | 0        | 0        | 0        | 0        | 0        | 0        | 1.330334 | 0        | -0.22987 | NA       | -0.21319 | NA       | -0.0675  | NA       |
| AT4G26830 | AT4G26830 | 3.566712 | 1.736984 | 11.58889 | 2.474493 | 1.987402 | 1.993682 | 2.66791  | 0        | 4.88123  | 6.716749 | 5.321336 | 5.179533 | -1.16384 | 0.058455 | -0.9943  | 0.133057 | -0.24674 | NA       |
| AT4G26840 | SUM01     | 439.8945 | 437.1403 | 458.4049 | 607.4881 | 649.8804 | 641.6005 | 347.7177 | 346.3237 | 707.7783 | 459.6176 | 508.1876 | 429.9012 | 0.334151 | 0.231835 | 0.066729 | 0.852075 | 0.061912 | 0.922225 |
| AT4G26850 | VTC2      | 3038.388 | 3035.002 | 2710.512 | 1868.655 | 1758.851 | 1774.377 | 1425.531 | 1634.518 | 1425.319 | 2586.908 | 2254.916 | 2366.011 | -0.69498 | 2.85E-11 | -0.96206 | 1.6E-20  | -0.28208 | 0.067481 |
| AT4G26860 | AT4G26860 | 477.9394 | 565.606  | 583.3074 | 419.4266 | 435.6194 | 403.7438 | 378.6904 | 359.2585 | 617.9409 | 552.0886 | 564.5691 | 574.811  | -0.33289 | 0.010766 | -0.50154 | 0.000115 | 0.096148 | 0.711805 |
| AT4G26870 | AT4G26870 | 589.6964 | 622.7019 | 603.9099 | 693.2706 | 649.2179 | 706.7601 | 488.7002 | 606.3361 | 579.8901 | 514.2868 | 482.9112 | 475.4811 | 0.173644 | 0.160829 | -0.06501 | 0.669578 | -0.27143 | 0.114105 |
| AT4G26880 | AT4G26880 | 0        | 0        | 0        | 0        | 0        | 0        | 0        | 0        | 0        | 0        | 0        | 0        | #N/A     | #N/A     | #N/A     | #N/A     | #N/A     | #N/A     |
| AT4G26890 | MAPKK16   | 3.566712 | 8.92123  | 6.438272 | 4.536571 | 5.962205 | 0.996841 | 6.225124 | 3.23667  | 9.76246  | 5.757214 | 3.991002 | 1.035907 | -0.40768 | 0.5591   | 0.066248 | 0.937234 | -0.49037 | NA       |
| AT4G26900 | HISN4     | 328.1375 | 438.9245 | 323.2012 | 367.4623 | 322.6216 | 366.8734 | 380.6219 | 399.1893 | 312.3987 | 334.8779 | 292.6735 | 321.131  | -0.03578 | 0.871888 | 0.01043  | 0.956466 | -0.18632 | 0.547565 |
| AT4G26910 | AT4G26910 | 499.3397 | 553.1163 | 498.3222 | 771.2171 | 698.903  | 906.1283 | 923.9863 | 906.2675 | 769.2818 | 450.9817 | 466.9472 | 427.8294 | 0.607    |          |          |          |          |          |

|           |           |          |          |          |          |          |          |          |          |          |          |          |           |          |          |          |          |          |          |
|-----------|-----------|----------|----------|----------|----------|----------|----------|----------|----------|----------|----------|----------|-----------|----------|----------|----------|----------|----------|----------|
| AT4G27410 | NAC072    | 101.0568 | 155.2294 | 112.0259 | 165.7911 | 174.8914 | 183.4187 | 196.5361 | 204.9891 | 239.1803 | 108.4275 | 106.4267 | 113.9497  | 0.513701 | 0.007236 | 0.801581 | 0.000017 | -0.13704 | 0.741119 |
| AT4G27415 | AT4G27415 | 0        | 0        | 0        | 0        | 0        | 0.996841 | 0.889303 | 0        | 0        | 0        | 0        | 1.035907  | 0.133712 | NA       | 0.142442 | NA       | 0.162585 | NA       |
| AT4G27420 | ABC69     | 0        | 0        | 0        | 0        | 0        | 0        | 0        | 0        | 0        | 0.959536 | 0        | 0         | 0        | NA       | 0        | NA       | 0.171512 | NA       |
| AT4G27430 | CIP7      | 1651.388 | 1199.013 | 1073.904 | 414.4777 | 458.4274 | 510.3825 | 529.1356 | 552.3916 | 461.7644 | 1140.888 | 1398.181 | 1133.282  | -1.47566 | 2.82E-18 | -1.31815 | 1.31E-14 | -0.09573 | 0.807024 |
| AT4G27435 | AT4G27435 | 47.55616 | 42.8219  | 59.2321  | 26.80701 | 29.81103 | 22.92734 | 12.45025 | 18.34113 | 41.97858 | 66.20796 | 57.20436 | 58.01077  | -0.83421 | 0.017143 | -0.95562 | 0.00921  | 0.257298 | 0.701627 |
| AT4G27440 | POR8      | 10112.82 | 10195.18 | 9878.884 | 5728.865 | 5891.321 | 6422.645 | 4972.985 | 5178.672 | 5680.775 | 8675.162 | 7915.487 | 101093.32 | -0.73564 | 1.42E-10 | -0.92204 | 0.42E-16 | -0.17066 | 0.407448 |
| AT4G27450 | AT4G27450 | 870.76   | 1211.503 | 968.3161 | 941.5448 | 967.8647 | 871.2388 | 849.2888 | 860.9542 | 813.2129 | 654.0033 | 633.239  | 762.4272  | -0.13039 | 0.437745 | -0.26964 | 0.089922 | -0.56404 | 0.010111 |
| AT4G27460 | CBX5      | 7.00814  | 5.352738 | 10.30123 | 33.40566 | 26.49869 | 29.90522 | 42.07671 | 33.79353 | 50.52725 | 19.95356 | 7.982004 | 8.287252  | 1.486956 | 0.000217 | 0.206814 | 2.22E-07 | -0.07604 | 0.950436 |
| AT4G27470 | RMA3      | 164.0687 | 151.6609 | 114.6012 | 162.4917 | 152.3675 | 175.444  | 119.1667 | 135.9401 | 152.2944 | 130.4968 | 170.2827 | 102.5547  | 0.181384 | 0.47625  | -0.07662 | 0.802696 | -0.09835 | 0.84885  |
| AT4G27480 | AT4G27480 | 17.83356 | 19.62671 | 9.01358  | 71.76031 | 64.92179 | 65.79149 | 40.90796 | 45.31338 | 37.09735 | 13.4335  | 17.29434 | 15.5386   | 1.996043 | 1.83E-10 | 1.29533  | 0.000151 | -0.01045 | 0.992454 |
| AT4G27490 | AT4G27490 | 85.60108 | 71.36984 | 91.42346 | 97.74249 | 129.8436 | 102.6746 | 121.8346 | 73.36452 | 117.1495 | 108.4275 | 99.77505 | 80.80071  | 0.383947 | 0.146459 | 0.312911 | 0.281216 | 0.19959  | 0.689682 |
| AT4G27500 | PP1       | 1747.689 | 1579.058 | 1546.473 | 1953.2   | 1884.719 | 2107.321 | 2022.276 | 2310.982 | 2656.365 | 1447.939 | 1481.992 | 1571.47   | 0.282472 | 0.034527 | 0.513847 | 5.34E-05 | -0.11386 | 0.650303 |
| AT4G27510 | AT4G27510 | 15.45575 | 23.1952  | 21.89012 | 11.96005 | 9.274542 | 16.94629 | 10.67164 | 7.55223  | 2.928738 | 15.35257 | 13.30334 | 13.46678  | -0.5871  | 0.207431 | -1.23791 | 0.009198 | -0.43272 | NA       |
| AT4G27520 | ENODL2    | 882.1667 | 777.9313 | 670.8679 | 544.801  | 494.8631 | 572.1866 | 467.7736 | 490.8949 | 526.1966 | 581.4786 | 509.5179 | 534.5278  | -0.52736 | 0.000117 | -0.64306 | 2.92E-06 | -0.51222 | 0.002916 |
| AT4G27530 | AT4G27530 | 1.188904 | 0        | 1.287654 | 0.824831 | 2.649869 | 0        | 0.889303 | 0        | 0.972646 | 0.959536 | 0        | 1.035907  | 0.167966 | 0.821784 | 0.167966 | 0.821784 | -0.08702 | NA       |
| AT4G27540 | PRA1H     | 89.1678  | 78.50683 | 101.7247 | 117.5384 | 131.831  | 87.72199 | 104.9378 | 111.1257 | 81.02842 | 96.9131  | 79.82004 | 85.98024  | 0.316846 | 0.203025 | 0.126709 | 0.67751  | -0.03802 | 0.952456 |
| AT4G27550 | TP54      | 2.377808 | 0        | 2.575309 | 0.412416 | 0        | 0        | 1.07889  | 0        | 2.878607 | 3.991002 | 2.079183 | -0.88552  | 0.167863 | -0.67585 | 0.325412 | 0.421669 | NA       | NA       |
| AT4G27560 | UGT7982   | 216.3805 | 128.4657 | 159.6691 | 182.7001 | 216.6268 | 174.4471 | 251.6729 | 234.1191 | 303.6125 | 223.5718 | 202.2108 | 199.193   | 0.167022 | 0.485498 | 0.346707 | 0.00297  | 0.288546 | 0.410204 |
| AT4G27570 | UGT7983   | 46.36725 | 24.97944 | 18.02716 | 20.20836 | 21.19895 | 28.90838 | 28.45771 | 37.76115 | 18.54867 | 31.66468 | 21.28534 | 35.22082  | -0.34867 | 0.432151 | -0.08933 | 0.870643 | -0.02181 | 0.984933 |
| AT4G27580 | AT4G27580 | 0        | 0        | 0        | 0.824831 | 0        | 2.990522 | 3.552124 | 0        | 0        | 0        | 0        | 1.035907  | 0.47075  | NA       | 0.466798 | NA       | 0.132075 | NA       |
| AT4G27585 | AT4G27585 | 247.292  | 205.1083 | 229.2025 | 130.1365 | 314.672  | 283.1028 | 284.5771 | 286.9847 | 312.3987 | 224.5313 | 219.5051 | 218.5763  | 0.404139 | 0.004436 | 0.361501 | 0.017163 | -0.04822 | 0.891696 |
| AT4G27590 | AT4G27590 | 3.566712 | 3.568492 | 5.150617 | 4.948987 | 4.637271 | 3.987363 | 2.66791  | 1.07889  | 3.904984 | 2.876507 | 1.330334 | 2.071813  | 0.143549 | 0.854789 | -0.41089 | 0.59374  | -0.54496 | NA       |
| AT4G27595 | AT4G27595 | 316.2484 | 242.6575 | 233.0654 | 55.26369 | 88.77061 | 75.7599  | 70.25498 | 83.07453 | 83.95716 | 231.2481 | 248.7725 | 256.9048  | -1.81517 | 2.8E-20  | -1.69091 | 7.66E-17 | -0.10513 | 0.813992 |
| AT4G27597 | AT4G27597 | 0        | 0        | 0        | 0        | 0        | 0        | 0        | 2.15778  | 0        | 0        | 0        | 0         | 0        | NA       | 0.266481 | 0        | 0        | 0        |
| AT4G27600 | NARA5     | 1134.214 | 1159.76  | 1080.342 | 833.9043 | 747.9256 | 865.2578 | 1072.5   | 1178.148 | 1099.253 | 1206.136 | 1161.382 | 1199.58   | -0.46054 | 7.17E-06 | -0.01008 | 0.947733 | 0.080999 | 0.702311 |
| AT4G27610 | AT4G27610 | 161.6909 | 215.8938 | 180.2716 | 166.2035 | 169.5916 | 171.4566 | 199.204  | 198.5157 | 197.2017 | 186.1499 | 191.5681 | 183.3555  | -0.12337 | 0.506884 | 0.105225 | 0.606482 | 0.020718 | 0.962641 |
| AT4G27620 | AT4G27620 | 135.535  | 169.5034 | 153.2039 | 168.2656 | 155.6798 | 160.4914 | 169.857  | 212.5413 | 170.843  | 161.202  | 158.3097 | 142.9551  | 0.090214 | 0.677848 | 0.2723   | 0.17299  | 0.021497 | 0.965356 |
| AT4G27630 | GTG2      | 59.4452  | 48.17464 | 54.08148 | 63.512   | 79.49607 | 62.80097 | 77.3694  | 59.33895 | 68.33722 | 85.39867 | 75.82904 | 61.11849  | 0.321598 | 0.241891 | 0.320322 | 0.279412 | 0.428831 | 0.296279 |
| AT4G27640 | AT4G27640 | 904.7559 | 713.6984 | 70.8679  | 326.2207 | 325.9339 | 375.809  | 425.979  | 306.6808 | 604.5074 | 538.7853 | 622.5798 | -1.12377  | 2.81E-08 | -0.12377 | 0.00015  | -0.36377 | 0.281676 | 0.00015  |
| AT4G27650 | PELL      | 189.0357 | 181.9931 | 168.6827 | 235.0769 | 196.7528 | 242.2323 | 216.99   | 199.5946 | 170.7585 | 171.7569 | 167.6221 | 180.2477  | 0.313526 | 0.071658 | 0.134996 | 0.521603 | -0.05254 | 0.989546 |
| AT4G27652 | AT4G27652 | 7.133244 | 0        | 5.150617 | 42.4788  | 47.69764 | 47.84836 | 48.48383 | 55.02339 | 196.2754 | 6.716749 | 11.97301 | 15.5386   | 2.528355 | 3.67E-08 | 3.685387 | 1.37E-16 | 0.825738 | 0.314058 |
| AT4G27654 | AT4G27654 | 0        | 0        | 0        | 2.886909 | 5.299738 | 5.981045 | 20.45398 | 9.710009 | 38.07359 | 0.959536 | 0        | 2.071813  | 1.362965 | 0.028005 | 1.362965 | 0.028005 | 0.345465 | NA       |
| AT4G27657 | AT4G27657 | 4.755616 | 5.352738 | 9.01358  | 33.40566 | 33.78583 | 53.8294  | 71.14428 | 52.86561 | 142.5319 | 10.55489 | 13.30334 | 11.39497  | 2.106371 | 1.12E-06 | 3.169134 | 3.27E-14 | 0.577999 | 0.500556 |
| AT4G27660 | AT4G27660 | 5.94452  | 3.568492 | 7.725926 | 9.073143 | 7.949607 | 9.968408 | 11.56091 | 11.86779 | 15.61994 | 8.638281 | 6.65167  | 13.46678  | 0.437698 | 0.451043 | 0.896756 | 0.102701 | 0.536155 | NA       |
| AT4G27670 | HSP2.3    | 0        | 0        | 0        | 0.412416 | 0.662467 | 0        | 0.323667 | 0        | 0        | 0        | 0        | 0         | 0.174932 | NA       | 0.461555 | NA       | 0        | NA       |
| AT4G27680 | AT4G27680 | 174.7689 | 153.4452 | 182.8469 | 220.6423 | 193.4404 | 214.3208 | 192.0896 | 209.3046 | 212.8216 | 166.9592 | 155.6491 | 181.2836  | 0.287143 | 0.089627 | 0.25174  | 0.172688 | -0.02432 | 0.957372 |
| AT4G27690 | VP56B     | 74.90095 | 78.50683 | 103.0123 | 138.5716 | 130.5061 | 118.6241 | 120.056  | 130.3368 | 110.3158 | 98.83217 | 89.13238 | 96.33931  | 0.584818 | 0.003947 | 0.354633 | 0.126155 | 0.143076 | 0.745585 |
| AT4G27700 | AT4G27700 | 1459.974 | 1527.315 | 1572.226 | 1133.73  | 1240.801 | 1019.768 | 997.985  | 873.9009 | 1277.906 | 1546.771 | 1379.556 | 1996.192  | -0.41591 | 0.024031 | -0.52189 | 0.004596 | 0.108994 | 0.773361 |
| AT4G27710 | CYP709B3  | 1071.202 | 1006.315 | 977.3296 | 806.2724 | 853.2578 | 801.46   | 646.5236 | 640.8606 | 605.2725 | 1095.79  | 1222.577 | 1030.727  | -0.30976 | 0.005853 | -0.68544 | 2.09E-10 | 0.192629 | 0.521894 |
| AT4G27720 | AT4G27720 | 506.4731 | 558.4669 | 601.3346 | 459.0185 | 431.9287 | 531.3163 | 339.7139 | 340.9292 | 323.1347 | 504.7157 | 485.5719 | 475.8411  | -0.22956 | 0.10167  | -0.72137 | 3.07E-02 | -0.18137 | 0.432866 |
| AT4G27730 | OPT6      | 105.8125 | 99.91778 | 82.40988 | 133.6226 | 103.3449 | 131.583  | 78.25871 | 118.6779 | 57.85851 | 94.99043 | 75.82904 | 87.01615  | 0.342149 | 0.223823 | -0.17594 | 0.59962  | -0.14686 | 0.795667 |
| AT4G27740 | AT4G27740 | 92.73451 | 115.976  | 103.0123 | 283.7419 | 268.9617 | 201.3618 | 154.7388 | 107.889  | 198.1779 | 97.87263 | 117.0694 | 130.5242  | 1.238564 | 8.82E-08 | 0.548433 | 0.037713 | 0.145279 | 0.786418 |
| AT4G27745 | AT4G27745 | 96.30122 | 98.13353 | 112.0259 | 176.9263 | 206.6898 | 162.485  | 159.1853 | 134.8612 | 120.8691 | 123.8701 | 133.0334 | 114.9856  | 0.809413 | 9.24E-05 | 0.6972   | 0.001338 | 0.263564 | 0.504728 |
| AT4G27750 | IS1       | 152.1797 | 144.5239 | 155.8062 | 151.7689 | 153.6924 | 167.4693 | 171.3656 | 148.8868 | 120.0783 | 140.0922 | 150.3277 | 185.4273  | 0.055017 | 0.826311 | -0.03821 | 0.890358 | 0.68837  | 0.879935 |
| AT4G27760 | FEY       | 177.1467 | 233.7362 | 181.5593 | 286.2164 | 268.2992 | 271.1407 | 203.6505 | 237.3558 | 219.6553 | 118.7741 | 202.2108 | 208.2172  | 0.48756  | 0.001753 | 0.165869 | 0.391601 | 0.100939 | 0.769037 |
| AT4G27765 | MIR28A    | 0        | 0        | 0        | 0.412416 | 0.662467 | 0        | 0        | 0.918756 | 0        | 0        | 0        | 0         | 0.209973 | NA       | 0        | NA       | 0        | 0        |
| AT4G27780 | ACBP2     | 67.76752 | 62.44861 | 91.42346 | 118.3633 | 107.9822 | 99.68408 | 92.87556 | 108.9679 | 100.5533 | 66.20796 | 71.83803 | 64.2262   | 0.539279 | 0.013789 | 0.41809  | 0.083445 | -0.14287 | 0.769636 |
| AT4G27790 | AT4G27790 | 1.188904 | 3.568492 | 0        | 1.649662 | 0.662467 | 0        | 0.889303 | 0        | 0        | 0        | 0        | 0         | -0.19732 | NA       | -0.49819 | NA       | -0.66756 | NA       |
| AT4G27800 | PPH1      | 1860.635 | 2519.355 | 2152.958 | 2435.726 | 2382.232 | 2299.712 | 2867.114 | 3207.54  | 3147.417 | 2340.307 | 2216.336 | 2245.845  | 0.12482  | 0.390094 | 0.494131 | 7.34E-05 | 0.060004 | 0.836071 |
| AT4G27810 | AT4G27810 | 0        | 1.784246 | 0        | 1.649662 | 0.662467 | 0.996841 | 0        | 1.07889  | 3.904984 | 0.959536 | 1.330334 | 3.10772   | 0.250536 | 0.74007  | 0.460452 | 0.526411 | 0.513554 | NA       |
| AT4G27820 | BGLU9     | 312.6817 | 324.7328 | 280.7086 | 481.289  | 437.8909 | 412.6921 | 632.2948 | 467.1593 | 495.9069 | 310.8895 | 341.8958 | 430.9     |          |          |          |          |          |          |

|           |           |          |          |          |          |          |          |          |          |          |          |          |           |           |          |           |          |          |           |
|-----------|-----------|----------|----------|----------|----------|----------|----------|----------|----------|----------|----------|----------|-----------|-----------|----------|-----------|----------|----------|-----------|
| AT4G28280 | LLG3      | 2.377808 | 3.568492 | 1.287654 | 5.773818 | 3.974804 | 2.990522 | 0        | 3.23667  | 2.928738 | 1.919071 | 7.982004 | 2.071813  | 0.533908  | 0.456693 | -0.13038  | 0.882841 | 0.378139 | NA        |
| AT4G28290 | AT4G28290 | 23.77808 | 41.03766 | 38.62963 | 72.58514 | 71.54647 | 51.83572 | 26.6791  | 31.28781 | 65.40888 | 67.16749 | 78.4897  | 53.86714  | 0.869676  | 0.012287 | 0.239874  | 0.592043 | 0.876314 | 0.069774  |
| AT4G28300 | AT4G28300 | 538.5735 | 485.3149 | 413.337  | 387.2582 | 341.1706 | 379.7963 | 410.8582 | 441.266  | 355.0849 | 363.664  | 355.1992 | 51.9515   | -0.36848  | 0.028019 | -0.28378  | 0.118838 | -0.46609 | 0.034513  |
| AT4G28310 | AT4G28310 | 72.52314 | 60.66437 | 78.54691 | 82.89553 | 107.3197 | 78.75042 | 52.46891 | 42.07671 | 80.05217 | 101.7108 | 90.46271 | 89.08796  | 0.323735  | 0.254202 | -0.27128  | 0.400322 | 0.384219 | 0.379774  |
| AT4G28320 | MAN5      | 64.20081 | 74.93833 | 81.12222 | 62.68717 | 60.94699 | 69.77885 | 69.36567 | 72.28563 | 55.64017 | 71.00564 | 70.5077  | 83.90843  | -0.1854   | 0.489197 | -0.14991  | 0.618503 | 0.039184 | 0.950218  |
| AT4G28330 | AT4G28330 | 10.37794 | 5.352738 | 11.58889 | 16.08421 | 13.24935 | 14.95261 | 8.003731 | 14.02557 | 10.56117 | 13.43351 | 17.29434 | 14.50269  | 0.427139  | 0.406289 | 0.361153  | 0.525712 | 0.356591 | NA        |
| AT4G28340 | AT4G28340 | 0        | 0        | 2.575309 | 2.062078 | 3.312336 | 0        | 0.889303 | 2.15778  | 0.972646 | 0        | 1.330334 | 0         | 0.400494  | 0.566373 | 0.166493  | 0.83465  | -0.24087 | NA        |
| AT4G28350 | LECRK2    | 41.61164 | 32.11643 | 33.47901 | 51.96436 | 45.71024 | 37.87995 | 56.02612 | 44.23449 | 68.33722 | 32.62421 | 26.60668 | 34.18492  | 0.3265    | 0.321212 | 0.608383  | 0.056099 | -0.18809 | 0.778089  |
| AT4G28360 | AT4G28360 | 222.325  | 226.5992 | 244.6543 | 220.6423 | 188.8032 | 214.3208 | 160.9639 | 182.3324 | 162.0568 | 296.4965 | 317.9498 | 263.1203  | -0.14993  | 0.402372 | -0.4518   | 0.006707 | 0.331045 | 0.156345  |
| AT4G28362 | AT4G28362 | 0        | 0        | 0        | 0        | 0        | 0        | 0        | 0        | 0        | 0        | 0        | 0         | #N/A      | #N/A     | #N/A      | #N/A     | #N/A     | #N/A      |
| AT4G28365 | ENODL3    | 0        | 0        | 0        | 0.412416 | 0        | 0        | 0        | 0        | 0        | 0        | 0        | 0         | 0.095918  | NA       | 0         | NA       | 0        | NA        |
| AT4G28370 | AT4G28370 | 177.1467 | 190.9143 | 212.463  | 138.984  | 136.4683 | 192.3903 | 200.9826 | 200.6735 | 122.0307 | 152.5662 | 103.766  | 156.4219  | -0.30793  | 0.246819 | -0.14252  | 0.648978 | -0.46504 | 0.219292  |
| AT4G28380 | AT4G28380 | 0        | 0        | 0        | 0        | 0        | 0        | 0        | 0        | 0        | 0        | 0        | 0         | #N/A      | #N/A     | #N/A      | #N/A     | #N/A     | #N/A      |
| AT4G28390 | AAC3      | 115.3237 | 174.8561 | 132.6284 | 430.1494 | 436.5659 | 437.6131 | 333.4888 | 332.2981 | 410.9996 | 61.41028 | 90.46271 | 74.58527  | 1.607367  | 2.01E-20 | 1.335259  | 5.51E-14 | -0.86571 | 0.000457  |
| AT4G28395 | ATA7      | 2.377808 | 24.97944 | 6.438272 | 0.248313 | 0.466337 | 357.7323 | 464.5278 | 393.9614 | 438.0293 | 287.0163 | 36.46235 | 6.65167   | -2.22533  | 0.002016 | -1.9071   | 0.002188 | 0.787569 | NA        |
| AT4G28397 | AT4G28397 | 2.377808 | 1.784246 | 2.575309 | 0.412416 | 0        | 0        | 0        | 0        | 0.972646 | 3.838143 | 1.330334 | 4.143626  | -1.09119  | 0.08831  | -0.87337  | 0.197959 | 0.32236  | NA        |
| AT4G28400 | AT4G28400 | 290.0926 | 369.3389 | 332.2148 | 615.324  | 647.893  | 638.9749 | 607.3943 | 566.4172 | 596.4863 | 289.7798 | 305.9768 | 287.982   | 0.937943  | 2.94E-15 | 0.836521  | 5.98E-12 | -0.15748 | 0.519436  |
| AT4G28405 | AT4G28405 | 1.188904 | 0        | 0        | 0        | 1.324935 | 0.996841 | 1.778607 | 1.07889  | 0.972646 | 0        | 0        | 0         | 0.147071  | NA       | 0.413349  | NA       | -0.26745 | NA        |
| AT4G28410 | AT4G28410 | 0        | 0        | 0        | 0        | 0        | 0        | 1.778607 | 0        | 0        | 0        | 0        | 0         | 0         | 0        | 0.248756  | 0        | 0        | NA        |
| AT4G28420 | AT4G28420 | 3.566712 | 0        | 0        | 2.886909 | 2.649869 | 1.993682 | 2.66791  | 1.07889  | 0.972646 | 0        | 1.330334 | 0         | 0.476155  | 0.509412 | 0.113095  | 0.895119 | -0.42539 | NA        |
| AT4G28430 | RTLNL8    | 16.64466 | 23.1952  | 18.02716 | 21.03319 | 16.56168 | 29.90522 | 18.67537 | 20.49891 | 16.59618 | 29.7456  | 18.62468 | 23.82585  | 0.190213  | 0.683144 | -0.03258  | 0.953822 | 0.32144  | 0.668486  |
| AT4G28440 | AT4G28440 | 301.9816 | 294.4006 | 302.5988 | 375.7106 | 374.9565 | 334.9385 | 252.5622 | 279.4325 | 475.4318 | 260.9937 | 226.1568 | 334.5978  | 0.263558  | 0.310429 | -0.157731 | 0.593458 | -0.12297 | 0.809732  |
| AT4G28450 | AT4G28450 | 198.547  | 137.3869 | 177.6963 | 255.2852 | 253.725  | 230.2702 | 232.1082 | 208.2258 | 245.0377 | 176.5546 | 151.6581 | 166.781   | 0.504786  | 0.002925 | 0.394312  | 0.031641 | -0.06308 | 0.879636  |
| AT4G28460 | AT4G28460 | 0        | 0        | 1.287654 | 4.536571 | 7.28714  | 3.987363 | 2.66791  | 5.39445  | 14.64369 | 0        | 0        | 0.207813  | 1.364415  | 0.03174  | 1.703933  | 0.007191 | 0.03706  | NA        |
| AT4G28470 | RPN1B     | 447.0279 | 403.2396 | 413.337  | 446.2337 | 357.7323 | 464.5278 | 393.9614 | 438.0293 | 287.0163 | 308.5539 | 548.0976 | 428.8653  | 0.003024  | 0.990839 | -0.17351  | 0.4467   | 0.225418 | 0.497495  |
| AT4G28480 | AT4G28480 | 259.1811 | 292.6163 | 260.1062 | 290.3406 | 279.5612 | 292.0743 | 229.4403 | 236.2769 | 279.2064 | 257.1555 | 170.2827 | 240.3303  | 0.088756  | 0.678299 | -0.11791  | 0.59727  | -0.26327 | 0.373178  |
| AT4G28485 | DMFP      | 1.188904 | 0        | 0        | 2.062078 | 0.662467 | 1.993682 | 0.889303 | 1.07889  | 0.972646 | 0.995936 | 0        | 0         | 0.569278  | 0.381997 | 0.257023  | 0.728334 | -0.07665 | NA        |
| AT4G28490 | RLK5      | 340.0265 | 210.541  | 211.1753 | 291.1654 | 309.3722 | 344.9069 | 226.7724 | 253.5391 | 212.8216 | 101.7108 | 107.7571 | 103.5907  | 0.293232  | 0.173002 | -0.14167  | 0.578868 | -1.25183 | 0.204E-08 |
| AT4G28500 | NAC073    | 8.322328 | 7.136984 | 19.31482 | 5.361402 | 5.299738 | 4.984204 | 5.338221 | 5.39445  | 2.928738 | 5.995356 | 18.62468 | 11.39497  | -0.92485  | 0.084519 | -1.04172  | 0.06789  | 0.125544 | NA        |
| AT4G28510 | PBH1      | 165.2576 | 167.7191 | 168.6827 | 257.3473 | 246.4378 | 227.2797 | 144.0672 | 183.4145 | 217.7029 | 140.0922 | 134.3637 | 149.1705  | 0.53729   | 0.002856 | 0.114837  | 0.631457 | -0.23587 | 0.483261  |
| AT4G28520 | CRC       | 0        | 0        | 0        | 0.824831 | 0        | 0        | 0        | 0        | 0        | 0        | 0        | 0         | 0.173038  | NA       | 0         | NA       | 0        | NA        |
| AT4G28530 | anaoC74   | 2.377808 | 0        | 3.862963 | 3.71174  | 3.974804 | 0.996841 | 3.557214 | 9.710009 | 4.88123  | 7.676285 | 5.321336 | 6.215439  | 0.18052   | 0.818792 | 0.840608  | 0.219307 | 0.921993 | NA        |
| AT4G28540 | CKL6      | 256.8033 | 217.678  | 236.9284 | 278.3805 | 304.0725 | 304.0364 | 325.8541 | 257.8547 | 227.4653 | 256.196  | 242.1208 | 256.9048  | 0.303836  | 0.048086 | 0.182323  | 0.366944 | 0.08061  | 0.836222  |
| AT4G28550 | AT4G28550 | 51.12287 | 69.5856  | 50.21852 | 62.27475 | 62.93439 | 71.77254 | 58.69403 | 69.04896 | 67.16749 | 59.86503 | 54.90305 | 0         | 0.276715  | 0.469205 | 0.274773  | 0.353224 | 0.108661 | 0.852822  |
| AT4G28556 | RIC7      | 1.188904 | 3.568492 | 2.575309 | 11.96005 | 5.299738 | 1.993682 | 6.225124 | 3.23667  | 5.87476  | 2.878607 | 5.321336 | 2.071813  | 0.940948  | 0.144449 | 0.630271  | 0.385521 | 0.235339 | NA        |
| AT4G28560 | RIC7      | 3.566712 | 3.568492 | 7.725926 | 6.186234 | 4.637271 | 5.981045 | 3.557214 | 2.15778  | 1.952492 | 7.676285 | 5.321336 | 2.071813  | 0.136634  | 0.856714 | -0.60069  | 0.40037  | 0.010641 | NA        |
| AT4G28564 | AT4G28564 | 0        | 0        | 0        | 0        | 0        | 0        | 0        | 0        | 0        | 0        | 0        | 0         | #N/A      | #N/A     | #N/A      | #N/A     | #N/A     | #N/A      |
| AT4G28570 | FAO4B     | 241.3475 | 201.6198 | 180.2716 | 270.1322 | 245.1129 | 312.0112 | 218.7687 | 278.3536 | 216.7266 | 183.2713 | 200.8804 | 182.3195  | 0.392278  | 0.034796 | 0.185595  | 0.399461 | -0.14054 | 0.707793  |
| AT4G28580 | MRS2-6    | 3.566712 | 0        | 0        | 0        | 0        | 0        | 0        | 0        | 0        | 0        | 0        | 0         | -0.5299   | NA       | -0.50432  | NA       | -0.32773 | NA        |
| AT4G28590 | AT4G28590 | 45.17835 | 71.36984 | 63.09506 | 91.14384 | 95.39529 | 82.37778 | 84.48383 | 96.0212  | 138.6269 | 60.45074 | 50.55269 | 65.765708 | 0.575343  | 0.036438 | 0.80496   | 0.00317  | 0.082103 | 0.901923  |
| AT4G28600 | NPGR2     | 290.0926 | 237.3047 | 253.6679 | 213.2189 | 202.715  | 250.207  | 240.1119 | 296.6947 | 222.5841 | 251.3983 | 243.5411 | 253.7971  | -0.23788  | 0.192233 | -0.04774  | 0.83991  | -0.06457 | 0.780094  |
| AT4G28610 | PHR1      | 543.3291 | 599.5067 | 647.6901 | 546.8631 | 616.0946 | 531.3161 | 657.1953 | 579.3639 | 534.0066 | 618.9005 | 634.5693 | 594.6103  | -0.07711  | 0.641893 | -0.01425  | 0.94251  | 0.045322 | 0.888185  |
| AT4G28620 | ABC24     | 0        | 1.784246 | 0        | 1.237247 | 0        | 1.993682 | 0.889303 | 1.07889  | 0        | 0.995936 | 1.330334 | 2.071813  | 0.249803  | 0.729913 | 0.05037   | 0.94994  | 0.418379 | NA        |
| AT4G28630 | ABC23     | 296.0371 | 301.5376 | 321.9136 | 264.7708 | 248.4252 | 278.1186 | 321.0386 | 265.4069 | 206.9642 | 358.8663 | 400.4305 | 337.7055  | -0.21445  | 0.267419 | -0.20697  | 0.3169   | 0.247354 | 0.403584  |
| AT4G28640 | IAA11     | 73.71204 | 89.21263 | 93.99877 | 90.73143 | 105.9948 | 75.7599  | 117.3881 | 65.81229 | 105.3446 | 105.5489 | 113.0784 | 110.842   | 0.092689  | 0.768178 | 0.171956  | 0.582826 | 0.347225 | 0.408691  |
| AT4G28650 | PXL2      | 27.34479 | 24.97944 | 21.21182 | 9.073143 | 11.92441 | 20.93366 | 19.56468 | 19.42002 | 20.33117 | 16.31211 | 30.59768 | 21.75404  | -0.20377  | 0.046174 | -0.28379  | 0.562279 | -0.12047 | 0.896642  |
| AT4G28652 | AT4G28652 | 1.188904 | 0        | 1.287654 | 0        | 0        | 0.996841 | 0        | 0        | 0        | 0        | 0        | 0.266068  | 0.2071813 | -0.34054 | NA        | -0.4776  | 0.280652 | NA        |
| AT4G28660 | P5B28     | 691.9421 | 788.6367 | 740.4012 | 476.34   | 457.7649 | 356.869  | 627.8483 | 539.445  | 1145.137 | 947.0617 | 983.1168 | 858.7665  | -0.74904  | 0.001797 | 0.056973  | 0.866918 | 0.316544 | 0.446507  |
| AT4G28670 | CRK43     | 0        | 5.352738 | 1.287654 | 1.237247 | 0        | 0.996841 | 0        | 1.07889  | 0        | 1.330334 | 0        | 0         | -0.44597  | 0.493369 | -0.65535  | 0.293041 | -0.61583 | NA        |
| AT4G28680 | TYRDC     | 29.7226  | 39.25341 | 42.49259 | 48.66504 | 37.09817 | 38.87679 | 20.45398 | 21.5778  | 14.6369  | 51.81492 | 51.88302 | 43.50807  | -0.180552 | 0.614669 | -0.88871  | 0.009154 | 0.387221 | 0.465594  |
| AT4G28690 | AT4G28690 | 49.93397 | 33.90067 | 38.62963 | 32.58083 | 35.77323 | 37.87995 | 38.24005 | 35.60337 | 21.47741 | 39.34096 | 33.25835 | 39.36045  | -0.21953  | 0.537084 | -0.35262  | 0.337846 | -0.13034 | 0.855651  |
| AT4G28700 | AMT1-4    | 4.755616 | 5.352738 | 3.862963 | 0.824831 | 1.987402 | 0.996841 | 1.778607 | 0        | 0.972646 | 3.838143 | 1.197301 | 6.215439  | -1.08192  | 0.009577 | -1.13649  | 0.913814 | 0.490164 | NA        |
| AT4G28703 | AT4G28703 | 2.377808 | 5.352738 | 6.438272 | 17.73837 | 21.19895 | 19.93682 | 21.34328 | 20.49    |          |          |          |           |           |          |           |          |          |           |

|           |            |          |          |          |          |          |          |          |          |          |          |          |          |          |          |          |           |          |          |
|-----------|------------|----------|----------|----------|----------|----------|----------|----------|----------|----------|----------|----------|----------|----------|----------|----------|-----------|----------|----------|
| AT4G29160 | VPS32.2    | 580.1851 | 688.719  | 633.5259 | 977.0125 | 1076.509 | 941.0177 | 845.7276 | 944.0287 | 1082.657 | 523.9065 | 448.3225 | 498.271  | 0.649879 | 1.52E-06 | 0.58941  | 2.02E-05  | -0.36102 | 0.074142 |
| AT4G29170 | MND1       | 22.58917 | 37.46917 | 24.46543 | 54.85127 | 53.65985 | 40.87047 | 41.79726 | 39.91893 | 44.90732 | 85.65307 | 35.91902 | 46.61579 | 0.816614 | 0.007624 | 0.57175  | 0.096489  | 0.704413 | 0.123878 |
| AT4G29180 | RHS16      | 2.377804 | 1.784246 | 1.287654 | 2.474493 | 1.987402 | 0.996841 | 1.778607 | 1.07889  | 1.952492 | 0.995936 | 1.330334 | 2.071813 | 0.050905 | 0.953813 | -0.08017 | 0.928632  | -0.14611 | NA       |
| AT4G29190 | AT4G29190  | 510.0398 | 747.5991 | 553.6914 | 592.2288 | 590.2583 | 739.6559 | 674.9813 | 745.5129 | 702.8971 | 381.8952 | 345.8868 | 402.9676 | 0.086988 | 0.678625 | 0.23076  | 0.23474   | -0.65857 | 0.001301 |
| AT4G29200 | AT4G29200  | 0        | 1.784246 | 0        | 0        | 0        | 0        | 0        | 0        | 0.889303 | 0        | 0        | 0        | -0.26522 | NA       | -0.08117 | NA        | -0.24296 | NA       |
| AT4G29210 | GGT3       | 247.292  | 208.7568 | 184.1346 | 418.1894 | 400.7927 | 399.7332 | 500.6739 | 511.3938 | 475.4318 | 197.6643 | 190.2378 | 178.1759 | 0.913189 | 2.78E-11 | 0.159535 | 1.49E-18  | -0.17882 | 0.52809  |
| AT4G29220 | PKF1       | 709.7757 | 815.4004 | 728.8124 | 720.9024 | 741.3009 | 752.6148 | 947.9975 | 1015.235 | 827.8566 | 918.2756 | 963.1618 | 787.289  | -0.02321 | 0.898036 | 0.30717  | 0.029139  | 0.242445 | 0.246344 |
| AT4G29230 | anao7K     | 17.83356 | 16.05821 | 18.02716 | 12.92488 | 11.26194 | 11.96209 | 17.78607 | 11.86779 | 7.809968 | 16.31211 | 22.61568 | 20.71813 | -0.46454 | 0.311776 | -0.40392 | 0.429889  | 0.16519  | NA       |
| AT4G29240 | AT4G29240  | 86.78999 | 73.15409 | 83.69753 | 24.74493 | 40.4105  | 27.91154 | 41.79726 | 35.60337 | 24.40615 | 62.36982 | 71.83803 | 74.58527 | -1.33311 | 4.27E-07 | -1.19339 | 0.000017  | -0.22029 | 0.676985 |
| AT4G29250 | AT4G29250  | 1.188904 | 3.568492 | 0        | 0.412416 | 0        | 0        | 0.889303 | 0        | 0        | 5.757214 | 6.65167  | 4.143626 | -0.80411 | 0.228227 | -0.58174 | 0.421719  | 1.164213 | NA       |
| AT4G29260 | AT4G29260  | 118.8904 | 171.2876 | 131.3407 | 167.7329 | 146.4053 | 155.5072 | 131.6169 | 153.2024 | 144.4844 | 167.9187 | 182.2558 | 137.7756 | 0.158666 | 0.478424 | 0.039527 | 0.887113  | 0.217836 | 0.539375 |
| AT4G29270 | AT4G29270  | 5.94452  | 8.92123  | 10.30123 | 15.25938 | 12.58688 | 5.981045 | 5.335821 | 9.710009 | 10.73871 | 30.70514 | 41.24035 | 35.22082 | 0.392572 | 0.463268 | 0.00376  | 0.995691  | 1.812884 | 0.000488 |
| AT4G29273 | LCR23      | 0        | 0        | 0        | 0        | 0        | 0        | 0        | 0        | 0        | 0        | 0        | 0        | #N/A     | #N/A     | #N/A     | #N/A      | #N/A     | #N/A     |
| AT4G29276 | AT4G29276  | 0        | 0        | 0        | 0        | 0        | 0        | 0        | 0        | 0.976246 | 0        | 0        | 0        | 0        | NA       | 0.16673  | NA        | 0        | NA       |
| AT4G29280 | LCR22      | 0        | 0        | 0        | 0        | 0        | 0        | 0        | 0        | 0        | 0        | 0        | 0        | #N/A     | #N/A     | #N/A     | #N/A      | #N/A     | #N/A     |
| AT4G29281 | AT4G29281  | 0        | 0        | 0        | 0        | 0        | 0        | 0        | 0        | 0        | 0        | 0        | 1.035907 | 0        | NA       | 0        | NA        | 0.172362 | NA       |
| AT4G29283 | LCR21      | 0        | 0        | 0        | 0        | 0        | 0        | 0        | 0        | 0        | 0        | 0        | 0        | #N/A     | #N/A     | #N/A     | #N/A      | #N/A     | #N/A     |
| AT4G29285 | LCR24      | 0        | 0        | 0        | 0        | 0        | 0        | 0.889303 | 0        | 0        | 0        | 0        | 0        | 0        | NA       | 0.160764 | NA        | 0        | NA       |
| AT4G29290 | LCR26      | 0        | 0        | 0        | 0        | 0        | 0        | 0        | 0        | 0        | 0        | 0        | 0        | #N/A     | #N/A     | #N/A     | #N/A      | #N/A     | #N/A     |
| AT4G29300 | LCR27      | 0        | 0        | 0        | 0        | 0        | 0        | 0        | 0        | 0        | 0        | 0        | 0        | #N/A     | #N/A     | #N/A     | #N/A      | #N/A     | #N/A     |
| AT4G29305 | LCR25      | 0        | 0        | 1.287654 | 0        | 0        | 0        | 0        | 0        | 0        | 0        | 0        | 0        | -0.2184  | NA       | -0.20558 | NA        | -0.19918 | NA       |
| AT4G29310 | AT4G29310  | 246.1031 | 253.3629 | 265.2568 | 89.9066  | 76.18374 | 99.68408 | 61.36194 | 86.3112  | 90.79088 | 237.0053 | 250.1028 | 256.9048 | -1.49993 | 3.7E-19  | -1.647   | 1.12E-20  | -0.03847 | 0.930902 |
| AT4G29330 | DER1       | 167.6355 | 176.6404 | 202.1617 | 459.431  | 476.9764 | 431.6321 | 314.8134 | 305.3259 | 290.9213 | 180.3927 | 176.9344 | 184.3914 | 1.308575 | 4.17E-23 | 0.725738 | 3.46E-07  | -0.01299 | 0.976969 |
| AT4G29340 | PRO3       | 0        | 0        | 0        | 2.886909 | 2.649869 | 0        | 0        | 0        | 1.952492 | 0        | 0        | 1.035907 | 0.774001 | NA       | 0.269205 | NA        | 0.139212 | NA       |
| AT4G29350 | PRO2       | 2419.42  | 2517.571 | 2713.088 | 2892.27  | 2615.421 | 2389.427 | 1706.573 | 1721.908 | 3113.248 | 2635.844 | 2338.727 | 2839.42  | 0.04483  | 0.875568 | -0.21891 | 0.393301  | 0.029854 | 0.959216 |
| AT4G29360 | AT4G29360  | 185.469  | 158.7979 | 171.258  | 87.84452 | 93.40789 | 88.71883 | 94.26617 | 98.17898 | 66.38473 | 194.7587 | 175.6041 | 152.2783 | -0.91545 | 1.09E-06 | -0.97296 | 6.52E-07  | 0.016086 | 0.976969 |
| AT4G29370 | AT4G29370  | 0        | 0        | 0        | 0        | 0        | 0        | 0        | 0        | 0.976246 | 0.995936 | 0        | 0        | 0        | NA       | 0.146371 | NA        | 0.148275 | NA       |
| AT4G29380 | AT4G29380  | 404.2273 | 374.6917 | 284.5716 | 244.5624 | 212.652  | 327.9606 | 354.8321 | 419.6882 | 233.3228 | 289.7798 | 239.4601 | 263.1203 | -0.42594 | 0.089344 | -0.07473 | 0.819898  | -0.40609 | 0.287597 |
| AT4G29390 | RPS30C     | 395.905  | 326.517  | 385.0086 | 584.8053 | 649.8804 | 412.6921 | 378.8433 | 288.0636 | 480.7273 | 731.6837 | 481.6965 | 0.51294  | 0.219235 | 0.335529 | 0.471326 | 0.547531  | 0.391267 | 0.547531 |
| AT4G29400 | AT4G29400  | 130.7794 | 149.8767 | 142.9296 | 127.024  | 134.4809 | 103.6714 | 129.8383 | 126.2301 | 170.2581 | 150.6471 | 190.2378 | 162.6373 | -0.19233 | 0.355747 | -0.13257 | 0.157586  | 0.242872 | 0.451792 |
| AT4G29410 | RPL28C     | 574.2406 | 645.8971 | 685.0321 | 998.0457 | 999.0006 | 785.5105 | 586.9403 | 624.6773 | 894.2413 | 775.3048 | 832.7891 | 768.6426 | 0.537336 | 0.002962 | 0.141714 | 0.530827  | 0.312146 | 0.281585 |
| AT4G29415 | AT4G29415  | 0        | 0        | 0        | 0        | 0        | 0        | 0        | 0        | 0        | 0        | 0        | 0        | #N/A     | #N/A     | #N/A     | #N/A      | #N/A     | #N/A     |
| AT4G29420 | AT4G29420  | 109.3792 | 123.113  | 101.7247 | 82.89553 | 84.79581 | 101.6778 | 88.04104 | 80.91675 | 89.81463 | 91.15588 | 87.80204 | 87.01615 | -0.31004 | 0.140654 | -0.34884 | 0.121154  | -0.31095 | 0.358921 |
| AT4G29430 | RPS15AE    | 27.34479 | 44.60615 | 54.08148 | 77.94654 | 64.25933 | 66.78833 | 38.24005 | 56.10228 | 74.1947  | 49.89585 | 35.91902 | 43.50807 | 0.696979 | 0.026294 | 0.346641 | 0.2929284 | 0.051197 | 0.952647 |
| AT4G29440 | AT4G29440  | 261.5589 | 223.0308 | 150.6556 | 155.0683 | 154.3549 | 218.3081 | 194.7575 | 216.8569 | 125.9357 | 184.2308 | 187.5771 | 153.1342 | -0.26322 | 0.359682 | -0.23109 | 0.457317  | -0.26349 | 0.577818 |
| AT4G29450 | AT4G29450  | 0        | 0        | 0        | 0        | 0.662467 | 0        | 0        | 0        | 0        | 0        | 0        | 0        | 0.092091 | NA       | 0        | NA        | 0.290617 | NA       |
| AT4G29460 | PLA2-GAMMM | 1.188904 | 0        | 0        | 3.71174  | 5.299738 | 0.996841 | 0.889303 | 2.15778  | 0        | 0        | 3.991002 | 4.143626 | -0.2184  | NA       | -0.20558 | NA        | -0.19918 | NA       |
| AT4G29470 | PLA2-DELTA | 1.188904 | 0        | 0        | 3.71174  | 5.299738 | 0.996841 | 0.889303 | 2.15778  | 0        | 0        | 3.991002 | 4.143626 | 0.99364  | 0.127013 | 0.182333 | 0.827057  | 0.743299 | NA       |
| AT4G29480 | AT4G29480  | 319.8152 | 331.8698 | 381.1457 | 565.8342 | 541.8982 | 465.5246 | 417.9726 | 414.2937 | 534.9828 | 473.0511 | 385.7969 | 469.2657 | 0.598886 | 0.000217 | 0.396306 | 0.024235  | 0.357842 | 0.150994 |
| AT4G29490 | AT4G29490  | 301.9816 | 296.1848 | 300.9272 | 461.9054 | 435.241  | 404.7174 | 411.7475 | 390.5582 | 446.1444 | 358.8663 | 323.2712 | 304.5565 | 0.482836 | 0.00037  | 0.419112 | 0.003294  | 0.084744 | 0.779875 |
| AT4G29510 | PRMT11     | 384.016  | 337.2225 | 381.1457 | 496.1359 | 488.9008 | 456.5531 | 480.2239 | 391.637  | 387.5697 | 389.5715 | 469.6079 | 353.2441 | 0.379183 | 0.016563 | 0.18681  | 0.310403  | 0.127143 | 0.684244 |
| AT4G29520 | AT4G29520  | 197.3581 | 219.4623 | 204.737  | 740.6984 | 840.671  | 684.8296 | 509.5709 | 510.3149 | 799.5455 | 165.9997 | 194.2288 | 208.2172 | 1.819533 | 2.65E-22 | 1.509074 | 2.18E-15  | -0.12477 | 0.781311 |
| AT4G29530 | AT4G29530  | 41.61164 | 53.52738 | 54.08148 | 69.69823 | 79.49607 | 77.75358 | 71.14428 | 73.36452 | 75.17094 | 64.28889 | 98.44471 | 68.36983 | 0.580462 | 0.022557 | 0.540464 | 0.047673  | 0.595067 | 0.105284 |
| AT4G29540 | LPXA       | 32.10041 | 30.33218 | 29.61605 | 53.61402 | 62.27192 | 57.81677 | 39.12935 | 45.31338 | 43.93107 | 31.66468 | 33.25835 | 35.22082 | 0.863172 | 0.001781 | 0.443094 | 0.178265  | 0.106874 | 0.879636 |
| AT4G29548 | AT4G29548  | 1.188904 | 0        | 0        | 0        | 0.662467 | 0        | 0        | 0        | 0        | 0        | 0        | 1.035907 | -0.09382 | NA       | -0.21476 | NA        | -0.02619 | NA       |
| AT4G29550 | AT4G29550  | 0        | 1.784246 | 1.287654 | 7.011065 | 5.299738 | 4.984204 | 3.557214 | 4.31556  | 2.928738 | 0        | 1.330334 | 3.10772  | 1.371666 | 0.02925  | 0.835171 | 0.238584  | 0.159693 | NA       |
| AT4G29560 | AT4G29560  | 28.53369 | 33.90067 | 27.04074 | 25.56977 | 23.18635 | 39.87363 | 24.9005  | 42.07671 | 19.52492 | 25.90746 | 22.61568 | 19.68222 | -0.02887 | 0.953663 | -0.04328 | 0.934777  | -0.33951 | 0.633705 |
| AT4G29570 | CDA8       | 0        | 0        | 0        | 2.474493 | 3.312336 | 1.993682 | 0        | 0        | 2.928738 | 0.995936 | 0        | 1.035907 | 1.08353  | 0.071839 | 0.437039 | 0.52624   | 0.311127 | NA       |
| AT4G29580 | CDA9       | 1.188904 | 3.568492 | 1.287654 | 0.412416 | 2.649869 | 1.993682 | 0.889303 | 0        | 0        | 0.995936 | 1.330334 | 0        | -0.0589  | 0.944745 | -0.71579 | 0.290968  | -0.46972 | NA       |
| AT4G29590 | AT4G29590  | 255.6143 | 335.4383 | 281.9963 | 236.3141 | 206.0273 | 238.2449 | 343.2711 | 333.377  | 329.9711 | 426.0338 | 532.1336 | 306.6283 | -0.34509 | 0.107459 | 0.205526 | 0.394295  | 0.522769 | 0.056905 |
| AT4G29600 | CDA7       | 0        | 1.784246 | 0        | 0        | 1.324935 | 0        | 0.889303 | 0        | 0        | 0        | 0        | 0        | -0.0167  | NA       | -0.08781 | NA        | -0.23897 | NA       |
| AT4G29610 | CDA6       | 15.45575 | 14.27397 | 12.87654 | 5.773818 | 3.974804 | 4.984204 | 10.67164 | 9.710009 | 14.64369 | 11.51443 | 9.312338 | 11.39497 | -1.2465  | 0.008379 | -0.23326 | 0.695702  | -0.33042 | NA       |
| AT4G29620 | CDA2       | 0        | 0        | 0        | 0        | 0        | 0        | 0        | 0        | 0        | 0        | 0        | 0        | #N/A     | #N/A     | #N/A     | #N/A      | #N/A     | #N/A     |
| AT4G29630 | CDA3       | 0        | 0        | 0        | 0        | 0        | 0        | 0        | 0        | 0        | 0        | 0        | 0        | #N/A     | #N/A     | #N/A     | #N/A      | #N/A     | #N/A     |
| AT4G29640 | CDA5       | 0        | 0        | 0        | 1.237247 | 0        | 0        | 0        | 1.07889  | 0        | 0        | 0        | 0        | 0.196938 | NA       | 0.140963 | NA        | 0        | NA       |
| AT4G29650 | CDA4       | 0        | 1.784246 | 0        | 0        | 0.662467 | 0        | 0        | 1.07889  | 1.952492 | 1.919071 | 0        | 0        | -0.18737 | NA       | 0.213716 | NA        | 0.072787 | NA       |
| AT4G29654 | AT4G29654  | 0        | 0        | 0        | 0        | 0        | 0        | 1.07889  | 0        | 0        | 0        | 0        | 0        | 0        | NA       |          |           |          |          |





|           |           |          |          |          |          |          |          |          |          |          |          |           |          |          |          |          |          |           |          |
|-----------|-----------|----------|----------|----------|----------|----------|----------|----------|----------|----------|----------|-----------|----------|----------|----------|----------|----------|-----------|----------|
| AT4G31020 | AT4G31020 | 9.511232 | 10.70548 | 7.725926 | 10.7228  | 12.58688 | 15.94945 | 8.003731 | 7.55223  | 13.66744 | 12.47396 | 2.660668  | 13.46678 | 0.392696 | 0.489952 | 0.058523 | 0.935233 | 0.073493  | NA       |
| AT4G31030 | AT4G31030 | 0        | 0        | 0        | 0        | 0        | 0        | 0        | 0        | 0        | 0        | 0         | 0        | #N/A     | #N/A     | #N/A     | #N/A     | #N/A      | #N/A     |
| AT4G31040 | AT4G31040 | 902.3781 | 952.7874 | 900.0704 | 813.2835 | 810.1975 | 771.5548 | 923.9863 | 904.1098 | 845.429  | 1004.634 | 840.7711  | 1008.973 | -0.19787 | 0.104916 | -0.04162 | 0.793682 | 0.054383  | 0.836447 |
| AT4G31050 | LIP2P     | 184.2801 | 132.0342 | 150.6556 | 116.7136 | 104.0074 | 127.5956 | 167.1891 | 154.2813 | 107.3871 | 200.5429 | 214.1838  | 190.6068 | -0.4256  | 0.049961 | -0.12804 | 0.636524 | 0.353123  | 0.287173 |
| AT4G31060 | ERF015    | 140.2907 | 135.6027 | 142.9296 | 125.3743 | 137.1307 | 137.564  | 147.6244 | 118.6779 | 134.7219 | 132.4159 | 142.3457  | 160.5655 | -0.07276 | 0.748258 | -0.05958 | 0.813158 | 0.05215   | 0.905632 |
| AT4G31070 | PCMP-E7   | 16.64466 | 16.05821 | 23.17728 | 20.20836 | 13.91181 | 33.89259 | 25.7988  | 40.99782 | 10.73871 | 30.70514 | 21.28534  | 17.61041 | 0.20488  | 0.715586 | 0.385991 | 0.883451 | 0.264047  | 0.783637 |
| AT4G31075 | AT4G31075 | 0        | 0        | 0        | 0        | 0        | 0        | 0        | 0        | 0        | 0        | 0         | 0        | #N/A     | #N/A     | #N/A     | #N/A     | #N/A      | #N/A     |
| AT4G31080 | AT4G31080 | 506.4731 | 503.1574 | 500.8975 | 438.3978 | 404.7675 | 482.4709 | 437.5373 | 463.9227 | 410.0233 | 419.3171 | 361.8508  | 415.3985 | -0.18993 | 0.176049 | -0.20227 | 0.172102 | -0.32885  | 0.076975 |
| AT4G31100 | WAKL17    | 3.566712 | 5.352738 | 2.575309 | 4.124156 | 4.637271 | 1.993682 | 5.335821 | 7.55223  | 5.87476  | 3.838143 | 0         | 5.179533 | -0.01386 | 0.987104 | 0.511768 | 0.479933 | -0.14638  | NA       |
| AT4G31110 | WAKL18    | 4.755616 | 5.352738 | 5.150617 | 5.773818 | 3.312336 | 9.968408 | 12.45025 | 7.55223  | 5.87476  | 10.55489 | 13.30334  | 3.10772  | 0.164383 | 0.821618 | 0.5518   | 0.410977 | 0.569175  | NA       |
| AT4G31115 | AT4G31115 | 219.9472 | 267.6369 | 229.2025 | 237.139  | 249.0877 | 258.1818 | 369.0609 | 362.507  | 361.211  | 326.2421 | 278.0398  | 293.1615 | 0.057918 | 0.753797 | 0.609905 | 1.36E-05 | 0.332585  | 0.117619 |
| AT4G31120 | PMRT15    | 235.403  | 262.2842 | 251.0926 | 249.9238 | 262.337  | 234.2576 | 217.8794 | 278.3536 | 164.0093 | 159.2829 | 172.9434  | 232.0431 | -0.00021 | 0.999744 | -0.17625 | 0.497941 | -0.3927   | 0.238317 |
| AT4G31130 | AT4G31130 | 187.8468 | 258.7157 | 186.7099 | 409.5287 | 392.8431 | 350.888  | 289.0236 | 292.3792 | 405.1421 | 183.2713 | 194.2288  | 180.2477 | 0.859161 | 2.25E-06 | 0.635254 | 0.000927 | -0.1692   | 0.655184 |
| AT4G31136 | AT4G31136 | 0        | 0        | 0        | 0        | 0        | 0        | 0        | 0        | 0        | 0        | 0         | 0        | #N/A     | #N/A     | #N/A     | #N/A     | #N/A      | #N/A     |
| AT4G31140 | AT4G31140 | 133.1572 | 99.91778 | 96.57408 | 41.24156 | 45.04777 | 36.88311 | 44.46517 | 51.78672 | 46.85981 | 71.96517 | 46.56169  | 79.7648  | -1.35981 | 1.23E-08 | -1.16219 | 3.24E-06 | -0.69639  | 0.838645 |
| AT4G31150 | AT4G31150 | 91.5456  | 82.07532 | 86.27284 | 137.7468 | 129.1811 | 120.6177 | 152.9602 | 108.9679 | 99.57709 | 81.56053 | 89.13238  | 96.33931 | 0.559752 | 0.011083 | 0.460356 | 0.003904 | 0.030753  | 0.96079  |
| AT4G31160 | DCAF1     | 436.3277 | 299.7533 | 243.3667 | 143.1082 | 129.8436 | 159.4945 | 176.0821 | 199.5946 | 131.7932 | 185.1904 | 194.2288  | 214.4327 | -1.14533 | 1.6E-07  | -0.92008 | 0.000047 | -0.70031  | 0.017604 |
| AT4G31170 | AT4G31170 | 634.8747 | 826.1059 | 708.2099 | 920.5116 | 787.6736 | 888.1851 | 704.3284 | 837.2186 | 928.4099 | 581.4786 | 544.1066  | 567.6768 | 0.259852 | 0.104502 | 0.187815 | 0.28555  | -0.34719  | 0.119101 |
| AT4G31180 | AT4G31180 | 896.4336 | 909.9655 | 852.4272 | 1033.513 | 1000.988 | 1083.566 | 902.643  | 924.6087 | 946.9586 | 712.935  | 776.915   | 718.9191 | 0.228175 | 0.026973 | 0.061691 | 0.638445 | -0.26662  | 0.061632 |
| AT4G31190 | AT4G31190 | 7.133424 | 0        | 5.150617 | 4.949887 | 3.974804 | 2.990522 | 4.46517  | 3.23667  | 4.88123  | 4.797678 | 6.65167   | 3.10772  | -0.07558 | 0.925562 | -0.04586 | 0.957402 | -0.075894 | NA       |
| AT4G31196 | AT4G31196 | 0        | 0        | 0        | 0        | 0        | 0        | 0        | 0        | 0        | 0        | 0         | 0        | #N/A     | #N/A     | #N/A     | #N/A     | #N/A      | #N/A     |
| AT4G31200 | AT4G31200 | 165.2576 | 114.1917 | 104.3    | 104.7536 | 95.39529 | 100.6809 | 96.04478 | 118.6779 | 69.31347 | 113.2252 | 137.0244  | 99.44703 | -0.34323 | 0.195718 | -0.42676 | 0.120689 | -0.14154  | 0.787884 |
| AT4G31210 | AT4G31210 | 354.2934 | 324.7328 | 357.9679 | 267.2453 | 205.3649 | 310.0175 | 265.9017 | 373.2959 | 226.4891 | 316.6468 | 327.2622  | 355.3159 | -0.40002 | 0.065171 | -0.2569  | 0.288234 | -0.05343  | 0.917771 |
| AT4G31230 | AT4G31230 | 4.755616 | 3.568492 | 3.862963 | 29.69392 | 25.17376 | 32.89575 | 15.11816 | 12.94668 | 11.71495 | 2.878607 | 3.991002  | 1.035907 | 2.334447 | 4.17E-07 | 1.278428 | 0.014808 | -0.43296  | NA       |
| AT4G31240 | AT4G31240 | 87.97889 | 64.23286 | 74.68395 | 73.40997 | 58.95959 | 83.73463 | 117.3881 | 115.4412 | 78.09968 | 72.92471 | 91.79304  | 83.90843 | -0.08447 | 0.7798   | 0.424559 | 0.121091 | 0.107649  | 0.852822 |
| AT4G31248 | AT4G31248 | 0        | 0        | 0        | 0        | 0.662467 | 0        | 0        | 0        | 0        | 0        | 1.330334  | 1.035907 | 0.108768 | NA       | 0        | NA       | 0.379095  | NA       |
| AT4G31250 | AT4G31250 | 8.322328 | 3.568492 | 7.725926 | 3.71174  | 5.299738 | 2.990522 | 3.557214 | 3.23667  | 0.972646 | 2.878607 | 1.330334  | 6.215439 | -0.5016  | 0.458859 | -0.89022 | 0.186673 | -0.61544  | NA       |
| AT4G31260 | AT4G31260 | 0        | 0        | 0        | 0        | 0        | 0        | 0        | 0        | 0        | 0        | 0         | 0        | #N/A     | #N/A     | #N/A     | #N/A     | #N/A      | #N/A     |
| AT4G31265 | AT4G31265 | 0        | 0        | 0        | 0        | 0        | 0        | 0.889303 | 0        | 0        | 0        | 0         | 0        | 0        | NA       | 0.160764 | NA       | 0         | NA       |
| AT4G31270 | AT4G31270 | 64.20081 | 76.72258 | 82.40988 | 102.2791 | 90.09555 | 58.81361 | 93.37687 | 78.75897 | 91.76712 | 66.20796 | 69.17737  | 76.65708 | 0.192222 | 0.508932 | 0.237418 | 0.434874 | -0.06763  | 0.915437 |
| AT4G31280 | AT4G31280 | 0        | 0        | 0        | 0        | 0        | 0        | 0        | 0        | 0        | 0        | 0         | 0        | #N/A     | #N/A     | #N/A     | #N/A     | #N/A      | #N/A     |
| AT4G31290 | AT4G31290 | 624.1746 | 685.1505 | 759.7161 | 456.1316 | 467.0394 | 429.6384 | 669.6455 | 600.9417 | 757.5669 | 841.5127 | 731.6837  | 765.5349 | -0.60331 | 6.66E-06 | -0.0273  | 0.889789 | 0.176446  | 0.467612 |
| AT4G31300 | PBA1      | 441.0834 | 485.3149 | 467.4185 | 740.286  | 768.462  | 605.0824 | 630.5162 | 589.0739 | 809.3079 | 827.7446 | 558.7403  | 498.271  | 0.595057 | 0.000154 | 0.53246  | 0.001003 | 0.18241   | 0.538161 |
| AT4G31310 | AT4G31310 | 228.2696 | 185.5616 | 271.6951 | 232.6024 | 294.1355 | 213.3239 | 231.2189 | 195.2791 | 396.3559 | 286.9012 | 345.8868  | 321.131  | 0.102159 | 0.753946 | 0.242793 | 0.420032 | 0.450333  | 0.26247  |
| AT4G31320 | AT4G31320 | 0        | 0        | 0        | 0.412416 | 0.662467 | 0        | 0.889303 | 1.07889  | 0        | 0        | 0         | 0        | 0.222195 | NA       | 0.359779 | NA       | 0         | NA       |
| AT4G31330 | AT4G31330 | 33.28931 | 39.25341 | 46.35556 | 29.28151 | 26.49869 | 24.92102 | 19.56468 | 19.42002 | 16.59618 | 45.09817 | 5.43669   | 49.72351 | -0.50746 | 0.107208 | -1.00976 | 0.002108 | 0.3122    | 0.563955 |
| AT4G31340 | AT4G31340 | 961.8233 | 981.3353 | 1023.685 | 1095.788 | 1020.2   | 1091.541 | 977.3445 | 1013.078 | 768.3056 | 807.929  | 754.2994  | 902.2746 | 0.111214 | 0.489549 | -0.10389 | 0.545207 | -0.26317  | 0.217892 |
| AT4G31350 | AT4G31350 | 234.2141 | 219.4623 | 294.8728 | 216.1058 | 213.9769 | 204.3524 | 216.1007 | 245.9869 | 160.1043 | 258.1151 | 235.4691  | 243.348  | -0.23574 | 0.249498 | -0.26657 | 0.214133 | -0.02465  | 0.961402 |
| AT4G31351 | AT4G31351 | 1.188904 | 1.784426 | 5.150617 | 2.886909 | 2.649869 | 8.971567 | 0        | 2.15778  | 3.904984 | 3.838143 | 0         | 3.10772  | 0.4462   | 0.546519 | -0.22556 | 0.792662 | -0.08772  | NA       |
| AT4G31354 | AT4G31354 | 0        | 7.136984 | 2.575309 | 1.649662 | 2.649869 | 4.984204 | 3.557214 | 3.23667  | 9.28738  | 5.757214 | 1.330334  | 2.071813 | -0.01734 | 0.984095 | 0.079071 | 0.929473 | 0.056409  | NA       |
| AT4G31355 | AT4G31355 | 2.377808 | 3.568492 | 1.287654 | 2.886909 | 2.649869 | 1.993682 | 2.66791  | 1.07889  | 0.972646 | 0        | 0         | 1.035907 | 0.136065 | 0.869801 | -0.24918 | 0.766629 | -0.83374  | NA       |
| AT4G31360 | AT4G31360 | 76.08985 | 55.31163 | 43.78025 | 60.21267 | 69.55906 | 50.83888 | 39.12935 | 47.47116 | 94.69586 | 62.36982 | 74.4987   | 69.40574 | 0.040087 | 0.928652 | 0.038539 | 0.934765 | 0.209677  | 0.757425 |
| AT4G31370 | FLAS      | 0        | 0        | 0        | 0.412416 | 0        | 0        | 0.996841 | 0        | 1.07889  | 0        | 1.919071  | 1.330334 | 0.198876 | NA       | 0.158767 | NA       | 0.865437  | NA       |
| AT4G31380 | FLP1      | 2.377808 | 5.352738 | 1.287654 | 0        | 1.324935 | 0        | 0.889303 | 3.23667  | 0        | 0.959536 | 3.991002  | 0        | -0.45116 | 0.15958  | -0.45116 | 0.545207 | -0.37509  | NA       |
| AT4G31390 | AT4G31390 | 285.3369 | 283.6951 | 220.1889 | 228.8906 | 194.7654 | 246.2197 | 452.6555 | 496.2894 | 308.4937 | 272.5081 | 282.0308  | 319.0592 | -0.23091 | 0.335153 | 0.65562  | 0.001369 | 0.144486  | 0.730957 |
| AT4G31398 | AT4G31398 | 0        | 0        | 0        | 1.649662 | 0.662467 | 1.993682 | 0.889303 | 1.215778 | 0.972646 | 0        | 0.5321336 | 1.035907 | 0.634621 | 0.312514 | 0.581891 | 0.396025 | 0.817262  | NA       |
| AT4G31400 | CTF7      | 19.02246 | 19.62671 | 21.89012 | 20.62078 | 12.58688 | 28.90838 | 23.12189 | 18.34113 | 20.50117 | 17.27164 | 19.95501  | 16.5745  | 0.005054 | 0.992671 | 0.034392 | 0.951375 | -0.15871  | 0.864774 |
| AT4G31408 | AT4G31408 | 0        | 0        | 0        | 0        | 0.824831 | 0        | 0        | 0        | 1.952492 | 0        | 0.3991002 | 0        | 0.09798  | NA       | 0.24532  | NA       | 0.441063  | NA       |
| AT4G31410 | AT4G31410 | 312.6817 | 283.6951 | 355.3926 | 379.8347 | 464.3896 | 369.8279 | 389.5149 | 390.5882 | 363.1635 | 304.1728 | 372.4935  | 292.1256 | 0.341834 | 0.040842 | 0.255388 | 0.164516 | 0.06112   | 0.972422 |
| AT4G31420 | AT4G31420 | 248.4800 | 264.0684 | 298.7358 | 291.1654 | 272.274  | 278.1186 | 368.1716 | 362.507  | 326.062  | 288.2022 | 236.7994  | 285.9101 | 0.053487 | 0.779882 | 0.375885 | 0.015488 | 0.005426  | 0.990348 |
| AT4G31430 | KAKU4     | 307.9261 | 237.3047 | 248.5173 | 282.9171 | 271.6116 | 281.1001 | 275.6841 | 294.537  | 345.0377 | 230.2886 | 262.0758  | 220.6481 | 0.065951 | 0.741069 | 0.029716 | 0.685256 | -0.16368  | 0.587303 |
| AT4G31440 | AT4G31440 | 26.15589 | 24.97944 | 37.34198 | 37.94223 | 33.78583 | 50.83888 | 37.35075 | 50.70783 | 42.25366 | 41.26003 | 31.92802  | 41.43626 | 0.40524  | 0.280974 | 0.276062 | 0.519652 | 0.389596  | 0.602089 |
| AT4G31441 | AT4G31441 | 8.322328 | 8.92123  | 12.87654 | 12.78488 | 10.59948 | 7.974726 |          |          |          |          |           |          |          |          |          |          |           |          |

|           |           |          |          |          |          |          |          |          |          |          |          |          |          |          |          |           |          |           |          |
|-----------|-----------|----------|----------|----------|----------|----------|----------|----------|----------|----------|----------|----------|----------|----------|----------|-----------|----------|-----------|----------|
| AT4G31910 | AT4G31910 | 17.83356 | 12.48972 | 14.1642  | 15.25938 | 11.26194 | 7.974726 | 12.45025 | 10.7889  | 7.809968 | 20.15025 | 19.95501 | 10.35907 | -0.28257 | 0.592904 | -0.44777  | 0.414892 | 0.13923   | NA       |
| AT4G31920 | ARR10     | 180.7134 | 217.678  | 216.3259 | 143.933  | 131.831  | 198.3713 | 160.0746 | 180.1746 | 108.3663 | 139.1327 | 211.5231 | 181.2836 | -0.36674 | 0.15341  | -0.43526  | 0.100768 | -0.20315  | 0.663474 |
| AT4G31930 | AT4G31930 | 38.04493 | 21.41095 | 39.91728 | 50.72712 | 44.38531 | 40.87047 | 39.12935 | 42.95482 | 43.1791  | 41.24035 | 41.43626 | 0.406774 | 0.209275 | 0.110156 | 0.795866  | 0.286305 | 0.624367  |          |
| AT4G31940 | CYP82C4   | 0        | 0        | 0        | 1.237247 | 0        | 0.996841 | 2.66791  | 1.07889  | 1.952492 | 0.959536 | 0        | 0        | 0.380186 | NA       | 0.88074   | NA       | 0.15565   | NA       |
| AT4G31950 | CYP82C3   | 2.377808 | 0        | 0        | 3.299325 | 3.312336 | 2.990522 | 6.225124 | 5.39445  | 2.928738 | 0.959536 | 0        | 0        | 0.828781 | 0.222255 | 1.20372   | 0.072343 | -0.31131  | NA       |
| AT4G31960 | AT4G31960 | 0        | 0        | 0        | 1.237247 | 0        | 0        | 0.889903 | 0        | 0        | 0.959536 | 0        | 0        | 0.210336 | NA       | 0.130462  | NA       | 0.143417  | NA       |
| AT4G31970 | CYP82C2   | 4.755616 | 1.784246 | 5.150617 | 35.46774 | 29.14856 | 46.85152 | 28.45771 | 12.94668 | 9.76246  | 2.878607 | 1.330334 | 1.035907 | 2.552921 | 1.076-07 | 1.553437  | 0.003177 | -0.62538  | NA       |
| AT4G31980 | AT4G31980 | 133.1572 | 128.4657 | 148.0802 | 190.1236 | 221.2641 | 195.3808 | 172.5249 | 202.8313 | 202.0829 | 103.6298 | 77.15937 | 135.7038 | 0.548626 | 0.006662 | 0.4772    | 0.026372 | -0.3526   | 0.304667 |
| AT4G31985 | RPL39C    | 141.4796 | 101.702  | 108.163  | 149.7069 | 176.2163 | 105.6651 | 100.4913 | 46.39227 | 320.2087 | 118.9824 | 207.5321 | 227.8994 | 0.225066 | 0.737727 | 0.312193  | 0.647009 | 0.502603  | 0.611918 |
| AT4G31990 | ASP5      | 1267.372 | 1100.88  | 1143.437 | 1125.482 | 1043.386 | 1048.676 | 1256.586 | 1309.772 | 1267.167 | 1268.506 | 1203.952 | 1178.862 | -0.12622 | 0.271942 | 0.123045  | 0.310586 | 0.053199  | 0.812628 |
| AT4G32000 | AT4G32000 | 105.8125 | 69.5856  | 78.54691 | 40.41673 | 41.73544 | 31.8989  | 28.45771 | 30.20892 | 16.59618 | 90.19635 | 67.84703 | 64.2262  | -1.09276 | 4.62E-05 | -1.65728  | 5.81E-09 | -0.18842  | 0.736164 |
| AT4G32010 | VAL2      | 136.2484 | 317.5958 | 253.6679 | 290.3406 | 235.8383 | 284.0996 | 302.3632 | 298.8525 | 188.4155 | 285.9416 | 239.4601 | 224.7917 | -0.12559 | 0.617613 | -0.16203  | 0.531833 | -0.23208  | 0.543547 |
| AT4G32020 | AT4G32020 | 2842.669 | 2423.006 | 2568.87  | 2251.377 | 2998.327 | 2895.822 | 3483.402 | 2849.348 | 3390.502 | 1773.222 | 1572.455 | 2318.359 | 0.053978 | 0.814913 | 0.305006  | 0.117422 | -0.45819  | 0.058445 |
| AT4G32030 | AT4G32030 | 223.5139 | 228.3835 | 213.7506 | 256.9349 | 255.7124 | 298.0554 | 203.6505 | 226.5669 | 330.9474 | 159.2829 | 220.8354 | 180.2477 | 0.274446 | 0.224479 | 0.188544  | 0.457061 | -0.24598  | 0.51804  |
| AT4G32040 | KNA75     | 298.4149 | 285.4794 | 270.4074 | 362.5133 | 345.8079 | 321.9796 | 291.6915 | 309.6414 | 347.5436 | 185.1904 | 200.8804 | 256.9048 | 0.269255 | 0.114344 | 0.14811   | 0.455211 | -0.40187  | 0.090007 |
| AT4G32050 | AT4G32050 | 93.92341 | 101.702  | 96.57408 | 111.3522 | 96.05775 | 106.662  | 105.8271 | 121.9146 | 69.31347 | 116.1038 | 103.766  | 106.6984 | 0.105952 | 0.705178 | 0.023377  | 0.943672 | 0.160887  | 0.730004 |
| AT4G32060 | AT4G32060 | 1546.764 | 1903.791 | 1760.223 | 2406.032 | 2581.635 | 2666.549 | 3544.764 | 3303.561 | 3642.374 | 1773.222 | 184.182  | 1945.432 | 0.55129  | 4.27E-07 | 1.003277  | 1.31E-21 | 0.094648  | 0.675122 |
| AT4G32070 | Phox4     | 273.4479 | 181.9931 | 162.2444 | 105.9908 | 109.3071 | 180.4282 | 138.7313 | 146.729  | 177.6768 | 159.2829 | 151.6581 | 169.8887 | -0.6358  | 0.102567 | -0.40298  | 0.153552 | -0.34982  | 0.416844 |
| AT4G32080 | AT4G32080 | 0        | 0        | 0        | 0        | 0        | 0        | 0        | 0        | 0        | 0        | 0        | 0        | 0        | NA       | 0         | NA       | 0.172362  | NA       |
| AT4G32090 | AT4G32090 | 0        | 0        | 0        | 0        | 0        | 0        | 0        | 0        | 0        | 0        | 0        | 0        | #N/A     | #N/A     | #N/A      | #N/A     | #N/A      | #N/A     |
| AT4G32100 | AT4G32100 | 1.188904 | 0        | 0        | 0        | 0        | 0        | 0        | 0        | 0        | 0        | 0        | 0        | -0.2184  | NA       | -0.20558  | NA       | -0.19918  | NA       |
| AT4G32105 | AT4G32105 | 0        | 0        | 0        | 0        | 0        | 0        | 0        | 0        | 0        | 0        | 0        | 0        | 0        | NA       | 0         | NA       | 0.172362  | NA       |
| AT4G32110 | AT4G32110 | 0        | 0        | 2.575309 | 0        | 0        | 0        | 0        | 0        | 0        | 0        | 0        | 0        | -0.35185 | NA       | -0.34032  | NA       | -0.33663  | NA       |
| AT4G32120 | B3GAL110  | 127.2127 | 158.7979 | 160.9568 | 144.7579 | 147.0677 | 159.4945 | 112.9415 | 153.2024 | 131.7932 | 134.335  | 143.6761 | 131.5601 | 0.015526 | 0.951588 | -0.16216  | 0.484195 | -0.11907  | 0.766458 |
| AT4G32130 | AT4G32130 | 204.4915 | 214.1095 | 220.1889 | 311.3738 | 299.4352 | 324.9701 | 248.1157 | 247.0658 | 330.9474 | 192.8667 | 146.3367 | 189.5709 | 0.539929 | 0.00175  | 0.364413  | 0.054697 | -0.25862  | 0.401957 |
| AT4G32140 | AT4G32140 | 102.2457 | 105.2705 | 90.1358  | 89.08176 | 94.73282 | 93.70303 | 92.48756 | 88.46897 | 109.3396 | 92.11542 | 87.80204 | 89.03796 | -0.09777 | 0.689416 | -0.02964  | 0.91778  | -0.1359   | 0.749335 |
| AT4G32150 | VAMP171   | 618.2301 | 763.6573 | 663.142  | 706.0555 | 699.5654 | 791.4916 | 793.2587 | 949.4231 | 1027.987 | 656.3224 | 685.122  | 589.4308 | 0.103641 | 0.554348 | 0.435027  | 0.003587 | -0.07912  | 0.805717 |
| AT4G32160 | AT4G32160 | 345.971  | 278.3424 | 298.7358 | 291.9902 | 262.9995 | 375.809  | 369.9502 | 381.927  | 289.9451 | 258.1151 | 282.0308 | 287.982  | 0.000795 | 0.99822  | 0.16635   | 0.458834 | -0.15819  | 0.66087  |
| AT4G32170 | CYP96A2   | 0        | 0        | 0        | 0        | 0        | 0        | 0        | 0        | 0.972646 | 0        | 0        | 0        | 0        | NA       | 0         | NA       | 0.16673   | NA       |
| AT4G32175 | AT4G32175 | 49.93397 | 57.09587 | 60.51975 | 63.09958 | 64.25933 | 49.84204 | 66.69776 | 44.23449 | 52.71728 | 55.65307 | 46.56169 | 63.1903  | 0.095722 | 0.77364  | -0.021    | 0.956731 | -0.00575  | 0.993459 |
| AT4G32180 | PANK2     | 150.0398 | 508.5101 | 419.7753 | 520.056  | 441.8657 | 501.4109 | 472.2201 | 553.4705 | 394.4034 | 423.1552 | 393.7789 | 452.6912 | 0.026465 | 0.90452  | -0.0178   | 0.940015 | -0.17402  | 0.564516 |
| AT4G32190 | AT4G32190 | 80.67699 | 804.695  | 686.3198 | 304.7751 | 296.1229 | 354.8753 | 359.2786 | 373.2959 | 314.3512 | 841.5127 | 780.906  | 784.1812 | -1.25509 | 1.28E-23 | -1.11898  | 2.16E-11 | 0.068525  | 0.814993 |
| AT4G32200 | ASY2      | 51.12287 | 51.74343 | 48.93086 | 37.52982 | 30.47349 | 26.6791  | 31.28781 | 26.35864 | 42.21957 | 14.63367 | 27.96948 | 0.47153  | 0.158709 | -0.7885  | 0.021073  | -0.74276 | 0.119122  |          |
| AT4G32205 | AT4G32205 | 1.188904 | 1.784246 | 2.575309 | 5.73818  | 5.299738 | 5.981045 | 4.446517 | 3.23667  | 4.88123  | 2.878607 | 0        | 1.035907 | 1.006932 | 0.117084 | 0.662617  | 0.361687 | -0.19374  | NA       |
| AT4G32208 | AT4G32208 | 67.76752 | 48.17464 | 65.67037 | 69.28582 | 94.73282 | 70.7775  | 64.91915 | 49.62894 | 111.292  | 73.88424 | 77.15937 | 53.86714 | 0.334813 | 0.326515 | 0.283867  | 0.447931 | 0.1465    | 0.836113 |
| AT4G32210 | SDH3      | 565.9183 | 528.1368 | 522.7877 | 518.4064 | 667.1045 | 574.1803 | 518.6439 | 552.3916 | 1.954292 | 3.056753 | 556.0796 | 493.015  | 0.117676 | 0.458055 | 0.001571  | 0.993672 | -0.05877  | 0.853259 |
| AT4G32212 | AT4G32212 | 5.94452  | 5.352738 | 9.01358  | 0.248831 | 0.662467 | 0.996841 | 4.446517 | 0        | 0.952492 | 8.388143 | 10.64267 | 10.35907 | -1.71333 | 0.400489 | -0.02448  | 0.125408 | -0.219787 | NA       |
| AT4G32215 | AT4G32215 | 0        | 0        | 0        | 0.412416 | 0        | 0        | 0        | 0        | 0        | 0.959536 | 0        | 0        | 0.066171 | NA       | 0         | NA       | 0.145274  | NA       |
| AT4G32220 | AT4G32220 | 3.566712 | 8.91213  | 6.438272 | 4.124156 | 5.962205 | 3.987363 | 3.552124 | 2.15778  | 6.833722 | 2.878607 | 3.991002 | 9.323159 | -0.2638  | 0.712997 | -0.36608  | 0.63278  | -0.11494  | NA       |
| AT4G32230 | AT4G32230 | 0        | 0        | 0        | 0        | 0        | 0        | 0        | 0        | 0        | 0        | 0        | 0        | #N/A     | #N/A     | #N/A      | #N/A     | #N/A      | #N/A     |
| AT4G32240 | AT4G32240 | 164.0687 | 146.3082 | 150.6556 | 256.1101 | 256.3748 | 205.3492 | 160.0746 | 146.729  | 290.9213 | 196.7048 | 168.9524 | 191.6427 | 0.61475  | 0.013107 | 0.357009  | 0.20299  | 0.261416  | 0.56626  |
| AT4G32250 | AT4G32250 | 322.193  | 289.0479 | 291.0099 | 279.6178 | 282.2111 | 342.9132 | 306.8097 | 257.8547 | 223.5603 | 300.3347 | 292.6735 | 279.6948 | -0.00517 | 0.981788 | -0.19194  | 0.326816 | -0.04945  | 0.90075  |
| AT4G32260 | AT4G32260 | 5920.742 | 6557.104 | 6434.409 | 3639.567 | 3881.396 | 3265.65  | 4471.418 | 4638.148 | 7298.415 | 7290.552 | 8236.098 | 6447.482 | -0.79056 | 1.67E-05 | -0.19999  | 0.375836 | 0.211393  | 0.538161 |
| AT4G32265 | AT4G32265 | 0        | 0        | 0        | 0        | 0        | 0        | 0        | 0        | 0        | 0        | 0        | 0        | #N/A     | #N/A     | #N/A      | #N/A     | #N/A      | #N/A     |
| AT4G32270 | AT4G32270 | 123.646  | 115.976  | 151.9432 | 100.217  | 127.8562 | 92.70619 | 128.949  | 152.1235 | 168.8906 | 115.1443 | 123.7211 | 136.379  | -0.28174 | 0.216198 | 0.187874  | 0.459807 | -0.06448  | 0.898417 |
| AT4G32272 | AT4G32272 | 118.8904 | 123.113  | 148.0802 | 200.0216 | 184.8284 | 214.3208 | 162.7425 | 173.7013 | 117.1495 | 117.0633 | 85.14137 | 91.15977 | 0.599045 | 0.003772 | 0.208233  | 0.414892 | -0.3913   | 0.258548 |
| AT4G32280 | IAA29     | 185.469  | 339.0067 | 309.037  | 35.88015 | 36.4357  | 31.8989  | 26.6791  | 23.73558 | 30.26363 | 139.1327 | 123.7211 | 152.2783 | -2.85874 | 5.97E-35 | -3.18906  | 3.51E-37 | -0.96211  | 0.000531 |
| AT4G32285 | AT4G32285 | 652.7083 | 590.5854 | 571.7185 | 503.9718 | 466.377  | 563.215  | 498.8993 | 575.0483 | 438.3345 | 423.1552 | 460.2956 | 476.517  | -0.24365 | 0.116438 | -0.26183  | 0.10586  | -0.41238  | 0.03697  |
| AT4G32290 | AT4G32290 | 42.80054 | 41.03766 | 42.49259 | 18.14629 | 15.23675 | 16.94629 | 16.89677 | 19.42002 | 30.26363 | 24.94793 | 19.95501 | 20.90538 | -1.22152 | 0.001664 | -0.85856  | 0.014331 | -0.7068   | 0.159404 |
| AT4G32295 | AT4G32295 | 64.20081 | 66.0171  | 52.79383 | 47.01538 | 52.99738 | 38.87679 | 39.12935 | 36.68226 | 37.09735 | 50.85539 | 51.88302 | 58.01077 | -0.36075 | 0.185367 | -0.65605  | 0.018684 | -0.17164  | 0.748808 |
| AT4G32300 | SD25      | 300.7927 | 315.8115 | 249.8049 | 256.1101 | 241.8006 | 334.9385 | 351.2749 | 422.9249 | 341.6681 | 254.2769 | 309.9678 | 277.6229 | -0.06807 | 0.795079 | -0.39362  | 0.066587 | -0.04062  | 0.930902 |
| AT4G32320 | APX6      | 166.4646 | 228.3835 | 203.4944 | 183.5249 | 171.579  | 180.4282 | 223.2152 | 245.9869 | 266.5152 | 305.1323 | 258.0848 | 275.5511 | -0.14577 | 0.456138 | -0.302899 | 1.003493 | 0.493197  | 0.023716 |
| AT4G32330 | AT4G32330 | 1361.295 | 1202.582 | 1202.669 | 750.183  |          |          |          |          |          |          |          |          |          |          |           |          |           |          |

|           |           |          |          |          |          |          |          |          |          |          |          |          |          |          |          |           |          |           |          |
|-----------|-----------|----------|----------|----------|----------|----------|----------|----------|----------|----------|----------|----------|----------|----------|----------|-----------|----------|-----------|----------|
| AT4G32780 | AT4G32780 | 4.755616 | 3.568492 | 5.150617 | 1.649662 | 0        | 2.990522 | 0.889303 | 1.07889  | 0.976246 | 4.797678 | 5.321336 | 3.10772  | -0.95146 | 0.151993 | -1.11358  | 0.10256  | -0.01301  | NA       |
| AT4G32785 | AT4G32785 | 10.70014 | 5.352738 | 6.438272 | 4.948987 | 1.324953 | 3.987363 | 1.778607 | 0        | 2.928738 | 6.176749 | 6.65167  | 9.323159 | -0.7975  | 0.20175  | -1.36284  | 0.030199 | 0.007417  | NA       |
| AT4G32790 | AT4G32790 | 149.8019 | 140.9554 | 146.7926 | 189.7112 | 174.2289 | 244.226  | 198.3147 | 244.908  | 191.3442 | 188.669  | 143.6761 | 174.0323 | 0.45071  | 0.025352 | 0.517604  | 0.01205  | 0.206558  | 0.582115 |
| AT4G32800 | ERF043    | 149.8019 | 112.4075 | 142.9296 | 132.3854 | 158.9921 | 169.4629 | 142.2886 | 159.6757 | 252.8477 | 120.9015 | 125.0514 | 106.6984 | 0.163899 | 0.564822 | 0.428244  | 0.102418 | -0.20217  | 0.673152 |
| AT4G32810 | CD8       | 8.322328 | 1.784246 | 7.725926 | 23.50769 | 20.53649 | 34.88943 | 22.23259 | 15.10446 | 25.3824  | 6.716749 | 11.97301 | 6.215439 | 1.679734 | 0.000198 | 1.396866  | 0.003583 | 0.23477   | NA       |
| AT4G32820 | AT4G32820 | 285.3369 | 264.0684 | 230.4901 | 152.5938 | 123.2189 | 208.3397 | 198.3147 | 227.6458 | 125.9357 | 264.8318 | 242.1208 | 244.4739 | -0.6712  | 0.004488 | -0.48124  | 0.061388 | -0.05068  | 0.933379 |
| AT4G32830 | AUR1      | 73.71204 | 60.66437 | 72.10864 | 105.166  | 97.38269 | 89.71251 | 79.14801 | 73.36452 | 64.43224 | 11.08229 | 75.82904 | 97.37521 | 0.485616 | 0.040262 | 0.057801  | 0.863951 | 0.47939   | 0.177994 |
| AT4G32840 | PFK6      | 108.1903 | 121.3287 | 87.5605  | 108.0529 | 114.6068 | 89.71251 | 106.7146 | 108.9679 | 82.98091 | 129.5373 | 162.3007 | 108.7702 | -0.00243 | 0.989628 | -0.07522  | 0.812076 | 0.327206  | 0.390655 |
| AT4G32850 | PAP54     | 904.7559 | 842.1641 | 737.8259 | 701.1065 | 753.2253 | 767.5674 | 905.3109 | 879.2953 | 991.8659 | 787.7787 | 925.9124 | 779.0017 | -0.16138 | 0.266923 | 0.158508  | 0.299464 | 0.002341  | 0.995116 |
| AT4G32860 | AT4G32860 | 0        | 0        | 0        | 0.412416 | 1.324935 | 0.996841 | 0        | 2.15778  | 3.904984 | 0        | 0        | 0        | 0.443035 | NA       | 0.883293  | NA       | 0         | NA       |
| AT4G32870 | AT4G32870 | 7.133244 | 23.1952  | 15.45185 | 53.61402 | 43.06037 | 42.86415 | 13.33955 | 14.02557 | 34.16861 | 8.635821 | 9.312338 | 9.323159 | 1.487876 | 0.00028  | 0.406367  | 0.443092 | -0.56103  | 0.496345 |
| AT4G32880 | ATHB-8    | 274.6368 | 210.541  | 231.7778 | 110.5274 | 82.14594 | 118.6241 | 137.842  | 165.0702 | 68.33722 | 211.0978 | 176.9344 | 172.9964 | -1.15081 | 9.19E-06 | -0.90806  | 0.000789 | -0.33863  | 0.47064  |
| AT4G32890 | GATA9     | 41.61164 | 46.3904  | 43.78025 | 32.99325 | 20.53649 | 20.93366 | 15.11816 | 20.49891 | 15.61994 | 23.02886 | 34.58868 | 31.0772  | -0.72138 | 0.030668 | -1.24802  | 0.000333 | -0.53749  | 0.319156 |
| AT4G32900 | AT4G32900 | 139.1018 | 139.1712 | 195.7235 | 231.3651 | 219.9391 | 218.3081 | 172.5249 | 182.3324 | 280.1826 | 203.4216 | 154.3187 | 171.9605 | 0.479081 | 0.038796 | 0.403234  | 0.105845 | -0.154391 | 0.743574 |
| AT4G32910 | NUP85     | 376.8826 | 303.3128 | 363.1185 | 338.9392 | 355.0825 | 355.8722 | 397.5187 | 431.556  | 429.5482 | 348.3114 | 327.2622 | 332.526  | -0.0021  | 0.990993 | 0.258434  | 0.027279 | 0.059993  | 0.858201 |
| AT4G32915 | GATC      | 321.0041 | 374.6917 | 382.4333 | 508.7457 | 586.946  | 439.6068 | 500.6779 | 429.3982 | 561.3414 | 531.5827 | 701.086  | 429.9012 | 0.500234 | 0.014485 | 0.457281  | 0.032828 | 0.606465  | 0.020148 |
| AT4G32920 | AT4G32920 | 128.4016 | 110.6233 | 97.86173 | 98.97974 | 80.82101 | 98.68724 | 128.0597 | 135.9401 | 93.71962 | 114.1847 | 70.5077  | 108.7702 | -0.26727 | 0.313706 | 0.080526  | 0.806488 | -0.18167  | 0.708209 |
| AT4G32924 | AT4G32924 | 0        | 0        | 0        | 0        | 0        | 0        | 0        | 0        | 0        | 0        | 0        | 0        | #N/A     | #N/A     | #N/A      | #N/A     | #N/A      | #N/A     |
| AT4G32930 | AT4G32930 | 134.3461 | 171.2876 | 172.5457 | 242.0879 | 237.8258 | 201.3618 | 154.7388 | 157.5179 | 280.1826 | 170.7973 | 192.8984 | 199.93   | 0.499134 | 0.041376 | 0.300941  | 0.227403 | 0.230478  | 0.609181 |
| AT4G32940 | GAMMA-VPE | 2493.132 | 2803.051 | 2203.177 | 3498.521 | 3917.169 | 3634.481 | 5096.598 | 5449.473 | 4766.033 | 1978.562 | 2273.541 | 2117.393 | 0.554623 | 4.25E-06 | 1.020595  | 1.279188 | -0.23256  | 0.235626 |
| AT4G32950 | AT4G32950 | 9.511232 | 19.62671 | 10.30123 | 24.33252 | 23.18635 | 21.9305  | 15.11816 | 16.18335 | 14.64369 | 9.593536 | 10.64267 | 7.251346 | 0.795636 | 0.059804 | 0.237332  | 0.667788 | -0.39567  | NA       |
| AT4G32960 | AT4G32960 | 161.6909 | 198.0153 | 189.2855 | 185.1746 | 199.4026 | 218.3081 | 202.7612 | 192.0424 | 174.7623 | 179.5356 | 160.9704 | 181.3146 | 0.131821 | 0.493952 | 0.026732  | 0.785388 | -0.0611   | 0.878612 |
| AT4G32970 | AT4G32970 | 107.0014 | 78.50683 | 95.28642 | 101.0418 | 100.695  | 82.73778 | 82.70522 | 118.6779 | 82.98091 | 89.23681 | 95.78405 | 104.6266 | 0.015589 | 0.960126 | -0.00149  | 0.996301 | 0.029665  | 0.961988 |
| AT4G32980 | ATH1      | 431.5721 | 363.9862 | 408.1864 | 315.0855 | 331.2336 | 395.7458 | 391.2935 | 347.4026 | 229.4178 | 590.1144 | 602.6413 | 553.1741 | -0.21015 | 0.334854 | -0.30841  | 0.15839  | 0.520793  | 0.044753 |
| AT4G32990 | AT4G32990 | 3.566712 | 7.136984 | 10.30123 | 7.835896 | 3.974804 | 6.977885 | 9.710009 | 2.928738 | 9.593536 | 7.982004 | 5.179533 | -0.09919 | 0.8938   | -0.28097 | 0.703312  | 0.100703 | 0.100703  | 0.100703 |
| AT4G33000 | CLB10     | 456.5391 | 467.4725 | 458.4049 | 325.3959 | 361.0447 | 344.9069 | 433.0908 | 331.2192 | 409.0471 | 606.2465 | 508.1876 | 578.0358 | -0.41828 | 0.00377  | -0.23017  | 0.157961 | 0.291587  | 0.179304 |
| AT4G33010 | GLDP1     | 10141.35 | 6794.409 | 6421.532 | 2255.088 | 2156.993 | 2568.859 | 6228.682 | 7643.935 | 4887.087 | 6621.525 | 5878.746 | 6158.464 | -1.69596 | 9.05E-20 | -0.30814  | 0.173881 | -0.3422   | 0.285872 |
| AT4G33020 | ZIP9      | 0        | 0        | 1.287654 | 0.412416 | 0        | 0        | 0        | 0        | 0        | 0        | 0        | 0        | -0.14081 | NA       | -0.22703  | NA       | -0.0337   | NA       |
| AT4G33030 | SQD1      | 608.7188 | 686.9347 | 732.6753 | 704.8182 | 540.5733 | 752.6148 | 624.291  | 753.0652 | 496.9092 | 696.6229 | 548.0976 | 717.8832 | -0.02151 | 0.936903 | -0.11128  | 0.658892 | -0.04412  | 0.928402 |
| AT4G33040 | GRXC6     | 30.9115  | 35.68492 | 19.31482 | 49.07745 | 45.04777 | 40.87047 | 33.79353 | 29.13003 | 58.57476 | 15.35257 | 25.27635 | 20.71813 | 0.628299 | 0.082391 | 0.476747  | 0.236068 | -0.43626  | 0.514832 |
| AT4G33050 | EDA39     | 334.082  | 437.1403 | 409.4741 | 1998.566 | 1954.941 | 2206.009 | 2222.369 | 2278.616 | 2241.461 | 241.803  | 219.5051 | 300.4129 | 2.355602 | 7.15E-17 | 2.484957  | 1.45E-78 | -0.61086  | 0.000877 |
| AT4G33060 | CYP5F     | 221.1361 | 223.0308 | 235.6407 | 284.1543 | 290.1607 | 320.9827 | 294.3595 | 342.6623 | 255.2365 | 262.0758 | 243.438  | 0.385244 | 0.010175 | 0.546436 | 0.000233  | 0.157459 | 0.579899  | 0.579899 |
| AT4G33070 | PCD1      | 2.377808 | 3.568492 | 2.575309 | 2.474493 | 1.324953 | 6.977885 | 2.66791  | 5.39445  | 4.88123  | 2.878607 | 1.330334 | 1.413626 | 0.138389 | 0.864358 | -0.37276  | 0.636141 | 0.011798  | NA       |
| AT4G33080 | AT4G33080 | 73.9765  | 686.9347 | 627.1617 | 590.5791 | 558.4599 | 585.1455 | 630.5162 | 567.4961 | 541.8165 | 752.2759 | 717.05   | 691.9856 | -0.32366 | 0.004262 | -0.32711  | 0.006872 | -0.01751  | 0.956354 |
| AT4G33090 | APM1      | 1720.344 | 1627.232 | 1437.022 | 1300.759 | 1393.831 | 1362.681 | 1506.48  | 1603.23  | 1416.533 | 1413.396 | 1536.536 | 1326.996 | -0.23627 | 0.052196 | -0.07954  | 0.592055 | -0.16127  | 0.422428 |
| AT4G33100 | AT4G33100 | 38.04493 | 39.25341 | 47.64321 | 96.09283 | 107.3197 | 77.75358 | 62.25124 | 58.26006 | 85.90965 | 48.93632 | 59.86503 | 29.00598 | 1.109938 | 0.000081 | 0.675715  | 0.031683 | 0.111933  | 0.876568 |
| AT4G33110 | AT4G33110 | 689.5643 | 607.8765 | 623.6617 | 557.9983 | 613.4447 | 545.2719 | 453.5448 | 416.4515 | 464.5214 | 413.975  | 1044.312 | 918.8841 | -0.27762 | 0.022708 | -0.64105  | 0.02E-08 | -0.52276  | 9.64E-05 |
| AT4G33120 | AT4G33120 | 32.10041 | 53.27338 | 52.79383 | 31.58683 | 31.79843 | 40.87047 | 35.57214 | 24.81447 | 30.26363 | 80.60099 | 63.85603 | 67.33392 | -0.37445 | 0.239564 | -0.5456   | 0.100924 | 0.609879  | 0.147272 |
| AT4G33130 | AT4G33130 | 23.77808 | 24.52794 | 27.04074 | 31.7506  | 34.4483  | 33.89259 | 38.24024 | 17.26224 | 31.29387 | 41.26003 | 33.25835 | 36.25673 | 0.363199 | 0.329749 | 0.189686  | 0.607036 | 0.509636  | 0.365357 |
| AT4G33140 | AT4G33140 | 73.71204 | 49.95889 | 70.82099 | 82.48311 | 94.73282 | 64.79465 | 96.04478 | 90.62675 | 123.007  | 79.64146 | 75.82904 | 68.36983 | 0.293848 | 0.279013 | 0.626032  | 0.014308 | 0.173716  | 0.738247 |
| AT4G33145 | AT4G33145 | 0        | 0        | 0        | 0        | 0        | 0        | 0        | 0        | 0        | 0        | 0        | 0        | #N/A     | #N/A     | #N/A      | #N/A     | #N/A      | #N/A     |
| AT4G33150 | LKR/SDH   | 236.5919 | 214.1095 | 208.6    | 294.0523 | 291.4856 | 453.5626 | 594.944  | 540.5239 | 296.7788 | 241.803  | 280.7005 | 263.1203 | 0.620844 | 0.016813 | 1.069934  | 1.64E-05 | 0.238474  | 0.624674 |
| AT4G33160 | FBX13     | 24.96698 | 24.97944 | 24.46543 | 17.32145 | 23.84882 | 24.92102 | 20.45398 | 24.81447 | 30.26363 | 17.27164 | 25.27635 | 15.5386  | -0.18262 | 0.677764 | 0.019045  | 0.97079  | -0.34186  | 0.629488 |
| AT4G33170 | PCMP-H53  | 20.21137 | 16.05821 | 16.73951 | 16.90094 | 9.937009 | 13.95577 | 14.22886 | 25.89336 | 15.61994 | 16.31211 | 15.96401 | 17.61041 | -0.32567 | 0.495399 | -0.044053 | 0.940749 | -0.08371  | 0.937457 |
| AT4G33180 | AT4G33180 | 79.65566 | 85.64381 | 64.38272 | 83.30795 | 113.9444 | 95.69671 | 107.6037 | 95.33895 | 107.3871 | 65.24842 | 73.16837 | 79.7648  | 0.337371 | 0.241226 | 0.256608  | 0.432028 | -0.06607  | 0.922046 |
| AT4G33200 | XI1       | 495.7729 | 472.8252 | 428.7889 | 321.6841 | 333.8835 | 372.8185 | 404.6351 | 438.0293 | 297.755  | 457.6985 | 481.5809 | 388.4469 | -0.43745 | 0.011795 | -0.28808  | 0.120522 | -0.07359  | 0.852376 |
| AT4G33210 | FB15      | 926.1562 | 917.1025 | 822.8111 | 517.5815 | 473.6641 | 609.0697 | 745.2363 | 733.6452 | 413.9283 | 717.7326 | 705.077  | 661.9443 | -0.71736 | 0.000394 | -0.48009  | 0.022723 | -0.34469  | 0.296514 |
| AT4G33220 | PME44     | 1021.268 | 1188.308 | 920.6729 | 704.8182 | 741.9633 | 751.6179 | 540.6965 | 580.4428 | 682.396  | 821.3625 | 723.7017 | 780.0376 | -0.50154 | 0.000267 | -0.78259  | 6.89E-09 | -0.41942  | 0.02223  |
| AT4G33230 | PME45     | 0        | 0        | 0        | 1.324935 | 0        | 0        | 0        | 0        | 0        | 0        | 0        | 0        | 0.21675  | NA       | 0         | NA       | 0         | NA       |
| AT4G33240 | FB1A      | 665.7862 | 554.9005 | 459.6926 | 280.4426 | 182.841  | 319.9859 | 393.0721 | 408.8993 | 222.5841 | 433.7101 | 403.0912 | 458.9066 | -1.05708 | 1.49E-05 | -         |          |           |          |

|           |           |          |          |          |          |          |          |          |          |          |          |          |          |           |          |          |          |           |          |
|-----------|-----------|----------|----------|----------|----------|----------|----------|----------|----------|----------|----------|----------|----------|-----------|----------|----------|----------|-----------|----------|
| AT4G33740 | AT4G33740 | 603.9632 | 544.195  | 497.0346 | 329.52   | 364.357  | 342.9132 | 378.8433 | 386.2426 | 465.6693 | 486.4846 | 585.3469 | 494.1274 | -0.65866  | 3.92E-06 | -0.41362 | 0.006994 | -0.0739   | 0.821978 |
| AT4G33760 | AT4G33760 | 450.5946 | 362.2019 | 408.1864 | 370.7616 | 326.5964 | 350.888  | 401.9652 | 383.0059 | 372.926  | 478.8083 | 417.7249 | 414.3626 | -0.22157  | 0.136378 | -0.08118 | 0.656261 | 0.097143  | 0.735214 |
| AT4G33770 | ITPK2     | 64.20081 | 66.0171  | 59.2321  | 74.2348  | 56.30972 | 76.75674 | 62.57562 | 46.85981 | 67.8298  | 57.7446  | 43.90102 | 49.72351 | -0.127818 | 0.672344 | -0.18607 | 0.560028 | -0.3441   | 0.444244 |
| AT4G33780 | AT4G33780 | 148.613  | 205.1883 | 200.8741 | 246.6245 | 266.9743 | 259.1786 | 289.0236 | 229.8036 | 246.9902 | 196.7048 | 152.9884 | 198.8941 | 0.475014  | 0.009781 | 0.465533 | 0.015234 | -0.0011   | 0.99816  |
| AT4G33790 | FAR3      | 208.0582 | 190.9134 | 135.2037 | 18.14629 | 23.18635 | 13.95577 | 2.66791  | 5.39445  | 3.909484 | 146.809  | 123.7211 | 143.931  | -3.09989  | 4.04E-36 | -4.73929 | 4.65E-43 | -0.34798  | 0.372189 |
| AT4G33800 | AT4G33800 | 7.133424 | 8.92123  | 7.725926 | 9.073143 | 9.274542 | 3.987363 | 6.225124 | 6.47336  | 8.786214 | 13.4335  | 7.982004 | 9.323159 | -0.10546  | 0.98238  | -0.10641 | 0.885206 | -0.325382 | NA       |
| AT4G33810 | AT4G33810 | 13.07794 | 21.41095 | 27.04074 | 11.54764 | 8.612075 | 11.96209 | 8.893035 | 7.55223  | 5.857476 | 20.15025 | 14.63367 | 17.61041 | -0.80913  | 0.064816 | -1.21868 | 0.008473 | -0.17862  | NA       |
| AT4G33820 | AT4G33820 | 1.188904 | 1.784246 | 0        | 0        | 0        | 0        | 0        | 0        | 0        | 0        | 0        | 0        | -0.49674  | NA       | -0.47297 | NA       | -0.46632  | NA       |
| AT4G33830 | AT4G33830 | 0        | 0        | 0        | 0        | 0        | 0        | 0        | 0        | 0        | 0        | 0        | 0        | #N/A      | #N/A     | #N/A     | #N/A     | #N/A      | #N/A     |
| AT4G33840 | AT4G33840 | 0        | 0        | 0        | 0.412416 | 0.662467 | 0.996841 | 0.889303 | 0        | 0        | 0        | 0        | 0        | 0.403388  | NA       | 0.171338 | NA       | 0         | NA       |
| AT4G33850 | AT4G33850 | 1.188904 | 0        | 0        | 0        | 0        | 0        | 0        | 0        | 0        | 0        | 0        | 0        | -0.2184   | NA       | -0.20558 | NA       | -0.19918  | NA       |
| AT4G33860 | AT4G33860 | 0        | 0        | 0        | 1.237247 | 0        | 0        | 1.778607 | 1.07889  | 0        | 0.995936 | 0        | 1.035907 | 0.219604  | NA       | 0.451276 | NA       | 0.326438  | NA       |
| AT4G33865 | RPS29A    | 145.0463 | 158.7979 | 136.4914 | 248.6866 | 292.1481 | 175.444  | 180.5286 | 107.889  | 454.9306 | 185.1904 | 411.0732 | 319.0592 | 0.575916  | 0.274219 | 0.619599 | 0.255894 | 0.868033  | 0.238696 |
| AT4G33870 | PER48     | 0        | 3.568492 | 1.287654 | 0        | 0        | 0        | 1.778607 | 0        | 0.976246 | 2.878607 | 1.330334 | 4.143626 | -0.89517  | 0.156744 | -0.21186 | 0.793251 | 0.492139  | NA       |
| AT4G33880 | BHLH85    | 0        | 0        | 0        | 0        | 0.662467 | 0        | 0        | 0        | 0        | 1.919071 | 1.330334 | 4.143626 | 0.04894   | NA       | 0        | NA       | 1.105617  | NA       |
| AT4G33890 | AT4G33890 | 205.6804 | 219.4623 | 193.1482 | 247.0369 | 257.6998 | 225.286  | 248.1157 | 264.328  | 314.3512 | 211.0978 | 228.8174 | 243.438  | 0.243362  | 0.158047 | 0.415565 | 0.013396 | 0.144568  | 0.647737 |
| AT4G33900 | AT4G33900 | 1.188904 | 0        | 0        | 0        | 0        | 0        | 0        | 1.07889  | 0        | 0        | 0        | 0        | -0.2127   | NA       | -0.02202 | NA       | -0.1938   | NA       |
| AT4G33905 | AT4G33905 | 5.94452  | 1.784246 | 0        | 1.237247 | 2.649869 | 1.993682 | 2.15778  | 1.952492 | 0.995936 | 0        | 1.035907 | 0        | -0.19556  | 0.808165 | -0.42568 | 0.580944 | -0.69035  | NA       |
| AT4G33910 | PAH9      | 246.1031 | 256.9314 | 247.2296 | 390.1451 | 455.7775 | 413.6889 | 397.5187 | 428.3193 | 433.4532 | 241.803  | 232.8084 | 285.9102 | 0.737677  | 7.92E-08 | 0.737924 | 1.33E-07 | 0.023476  | 0.953945 |
| AT4G33920 | AT4G33920 | 178.3356 | 208.7568 | 171.258  | 317.1476 | 351.7701 | 412.6921 | 539.8072 | 511.3938 | 528.1491 | 146.809  | 155.6491 | 179.2118 | 0.936965  | 1.53E-09 | 1.483521 | 8.77E-23 | -0.2008   | 0.525695 |
| AT4G33925 | AT4G33925 | 11.88904 | 10.70548 | 19.31482 | 13.1973  | 15.89921 | 12.95893 | 15.1816  | 8.63112  | 22.45366 | 16.31211 | 18.62468 | 17.61041 | -0.01512  | 0.979679 | 0.112782 | 0.853242 | 0.261815  | NA       |
| AT4G33930 | AT4G33930 | 0        | 0        | 0        | 3.71714  | 3.974804 | 2.990522 | 5.335821 | 7.55223  | 3.904984 | 0        | 0        | 1.035907 | 1.380469  | 0.028755 | 1.795126 | 0.00399  | 0.095655  | NA       |
| AT4G33940 | AT4G33940 | 142.6685 | 171.2876 | 140.3543 | 326.6331 | 296.7853 | 334.9385 | 252.5622 | 306.4047 | 343.6386 | 173.6759 | 175.6041 | 161.6014 | 1.064272  | 6.49E-11 | 0.977931 | 4.59E-09 | 0.172772  | 0.614816 |
| AT4G33945 | AT4G33945 | 296.0371 | 331.8698 | 323.2012 | 261.4715 | 306.0599 | 340.9195 | 330.8209 | 299.9314 | 289.9451 | 379.9761 | 359.1902 | 299.377  | -0.07092  | 0.729233 | -0.0425  | 0.85315  | 0.127137  | 0.694796 |
| AT4G33950 | SRK2E     | 128.4016 | 142.7397 | 169.9704 | 150.5317 | 155.6798 | 162.485  | 237.444  | 185.5691 | 226.4891 | 184.2308 | 163.6311 | 138.8115 | 0.081036  | 0.736003 | 0.548142 | 0.004563 | 0.139117  | 0.722099 |
| AT4G33960 | AT4G33960 | 4.260054 | 30.33218 | 37.34198 | 50.3147  | 62.93439 | 29.90522 | 40.90796 | 32.3667  | 91.76712 | 46.05771 | 87.80204 | 61.11849 | 0.330118  | 0.467224 | 0.504067 | 0.262812 | 0.710515  | 0.242253 |
| AT4G33970 | PEX4      | 3.56512  | 1.784246 | 2.575309 | 0        | 0.662467 | 1.993682 | 2.66791  | 0        | 1.952492 | 2.878607 | 0        | 3.10772  | -0.75251  | 0.272327 | -0.34164 | 0.668838 | -0.16592  | NA       |
| AT4G33980 | AT4G33980 | 8.322328 | 17.84246 | 14.1642  | 57.73818 | 68.8966  | 77.75358 | 311.2562 | 406.7415 | 531.0778 | 11.51443 | 9.312338 | 17.61041 | 2.102489  | 9.72E-11 | 4.63542  | 1.22E-51 | -0.03543  | 0.975694 |
| AT4G33985 | AT4G33985 | 7.133424 | 8.92123  | 10.30123 | 42.89122 | 58.95959 | 58.81361 | 87.20522 | 64.7334  | 122.4566 | 6.716749 | 5.321336 | 15.5386  | 2.223537  | 1.28E-08 | 2.98458  | 5.87E-15 | 0.035648  | 0.978516 |
| AT4G33990 | EMB2758   | 20.21137 | 24.97944 | 29.61605 | 23.09527 | 16.56168 | 14.95261 | 13.12562 | 32.3667  | 22.45366 | 33.58375 | 26.60668 | 23.82585 | -0.37522  | 0.353243 | 0.187542 | 0.686424 | 0.16344   | 0.842399 |
| AT4G34000 | ABF3      | 411.3608 | 360.4177 | 439.0901 | 287.4537 | 270.2866 | 301.4459 | 208.9863 | 225.488  | 218.6791 | 466.3343 | 489.5629 | 417.4073 | -0.497    | 0.000246 | -0.88474 | 7.94E-11 | 0.172807  | 0.477337 |
| AT4G34020 | DIJ1      | 297.226  | 388.9654 | 347.6667 | 383.5465 | 325.2714 | 340.9195 | 381.9465 | 390.5582 | 334.8524 | 353.1091 | 304.6465 | 314.9156 | 0.032327  | 0.804428 | 0.077972 | 0.701816 | -0.07707  | 0.872337 |
| AT4G34030 | MCCB      | 546.8958 | 526.3526 | 533.0889 | 477.9897 | 367.6693 | 470.5088 | 454.4341 | 527.5772 | 442.2394 | 538.2995 | 439.0102 | 505.5224 | -0.28365  | 0.078326 | -0.17258 | 0.343712 | -0.1151   | 0.72091  |
| AT4G34035 | AT4G34035 | 0        | 0        | 0        | 0        | 0        | 0        | 0        | 0.972464 | 0        | 0        | 0        | 0        | 0         | NA       | 0.166246 | 0        | 0         | NA       |
| AT4G34040 | MBR2      | 432.761  | 403.2396 | 379.858  | 326.2207 | 306.0599 | 363.8469 | 386.847  | 411.0571 | 299.7075 | 343.5138 | 328.5925 | 337.7055 | -0.28751  | 0.077635 | -0.1466  | 0.493699 | -0.26345  | 0.297173 |
| AT4G34050 | CCOAO1M1  | 2166.183 | 2216.034 | 2250.82  | 2697.61  | 2476.303 | 2323.636 | 1910.224 | 1835.192 | 1863.654 | 2641.602 | 2953.341 | 1847.021 | 0.174264  | 0.34584  | -0.23756 | 0.201398 | 0.162539  | 0.594257 |
| AT4G34060 | DM13      | 136.724  | 137.3869 | 145.5049 | 40.82914 | 46.37271 | 34.88943 | 77.3694  | 52.86561 | 68.07359 | 177.5141 | 168.9524 | 187.4991 | -1.27018  | 1.77E-14 | -1.25954 | 3.86E-08 | 0.340571  | 0.350508 |
| AT4G34065 | AT4G34065 | 0        | 0        | 0        | 0        | 0        | 0        | 0        | 0        | 0        | 0        | 1.330334 | 0        | 0         | NA       | 0        | NA       | 0.172362  | NA       |
| AT4G34070 | AT4G34070 | 211.6249 | 199.8356 | 221.4765 | 241.6755 | 244.4504 | 266.1565 | 199.204  | 203.9102 | 258.7052 | 226.504  | 234.1388 | 202.0018 | 0.237822  | 0.174092 | 0.059708 | 0.793414 | 0.059502  | 0.879283 |
| AT4G34071 | AT4G34071 | 0        | 0        | 0        | 0        | 0        | 0        | 0        | 0        | 0        | 0        | 0        | 0        | #N/A      | #N/A     | #N/A     | #N/A     | #N/A      | #N/A     |
| AT4G34080 | AT4G34080 | 0        | 0        | 0        | 0        | 0        | 0        | 0        | 0        | 0        | 0        | 0        | 0        | #N/A      | #N/A     | #N/A     | #N/A     | #N/A      | #N/A     |
| AT4G34090 | AT4G34090 | 342.4043 | 421.0821 | 410.7617 | 269.3074 | 254.3874 | 296.0617 | 354.8321 | 400.2682 | 451.0256 | 460.5771 | 348.5475 | 553.1741 | -0.50632  | 0.007828 | 0.040028 | 0.881209 | 0.21572   | 0.524933 |
| AT4G34100 | SUD1      | 1341.084 | 1252.541 | 1028.836 | 661.1022 | 557.135  | 813.4221 | 817.2699 | 961.2909 | 691.1822 | 845.3509 | 740.996  | 882.5924 | -0.81815  | 0.039448 | -0.54069 | 0.003948 | -0.53976  | 0.024463 |
| AT4G34103 | AT4G34103 | 10.70014 | 8.92123  | 3.82963  | 6.598469 | 4.637271 | 3.987363 | 7.144248 | 5.39445  | 3.987363 | 1.919071 | 2.660668 | 9.323159 | -0.42131  | 0.519285 | -0.08879 | 0.910674 | -0.51741  | NA       |
| AT4G34110 | PAB2      | 597.3386 | 529.6239 | 501.687  | 4082.914 | 3718.429 | 4486.78  | 3934.279 | 4799.981 | 4169.547 | 4729.551 | 4706.722 | 4171.596 | -0.40101  | 0.001957 | -0.33107 | 0.014528 | -0.25514  | 1.199142 |
| AT4G34120 | CBX2      | 897.6225 | 1188.308 | 1025.611 | 1430.257 | 1561.435 | 1356.7   | 1693.234 | 1667.964 | 1880.25  | 1081.397 | 1094.865 | 1106.348 | 0.47914   | 0.000168 | 0.745195 | 1.57E-09 | 0.07252   | 0.7818   |
| AT4G34131 | UGT7383   | 20.21137 | 23.1952  | 10.30123 | 40.82914 | 35.77323 | 47.84836 | 54.24751 | 52.86561 | 68.07359 | 6.835821 | 6.65167  | 7.251346 | 1.13075   | 0.001278 | 1.345938 | 0.000138 | -0.99231  | 0.102164 |
| AT4G34135 | UGT7382   | 30.9115  | 33.90067 | 30.9037  | 97.33008 | 84.13334 | 118.6241 | 112.9415 | 102.4945 | 100.5533 | 11.51443 | 13.30334 | 19.68222 | 1.5709    | 8.24E-10 | 1.652006 | 1.71E-10 | -0.97591  | 0.025938 |
| AT4G34138 | UGT7381   | 102.2457 | 105.2705 | 110.7383 | 66.39891 | 84.13334 | 103.6714 | 146.7351 | 179.0957 | 181.5588 | 89.23681 | 118.3997 | 107.7343 | -0.34069  | 0.154925 | 0.651851 | 0.003334 | -0.01996  | 0.975777 |
| AT4G34140 | AT4G34140 | 241.3475 | 255.1472 | 291.0099 | 299.4137 | 259.6872 | 296.617  | 286.3557 | 346.3237 | 268.4676 | 265.9714 | 250.1028 | 280.7307 | 0.11657   | 0.538118 | 0.188537 | 0.319031 | 0.017664  | 0.969668 |
| AT4G34150 | AT4G34150 | 224.7028 | 283.6951 | 244.6543 | 499.0228 | 485.5885 | 570.1929 | 50.4789  | 617.125  | 719.4933 | 205.3406 | 255.4241 | 203.0077 | 1.030854  | 8.4E-11  | 0.130725 | 8.72E-17 | -0.17721  | 0.591092 |
| AT4G34160 | CYCD3-1   | 385.2049 | 212.3253 | 261.3938 | 230.5403 | 242.463  | 270.1439 | 226.7724 | 252.4602 | 184.5105 | 284.0225 | 258.0848 | 253.7971 | -0.21516  | 0.373    | -0.37064 | 0.118416 | -0.11485  | 0.804723 |
| AT4G34170 | AT4G34170 | 0        | 0        | 0        | 0        | 0        | 0.996841 | 0.889303 | 0        | 0        | 0        | 0        | 0        |           |          |          |          |           |          |

|           |           |          |          |          |          |          |          |          |          |           |          |          |          |          |          |           |          |          |          |
|-----------|-----------|----------|----------|----------|----------|----------|----------|----------|----------|-----------|----------|----------|----------|----------|----------|-----------|----------|----------|----------|
| AT4G34610 | BLH6      | 344.7821 | 326.517  | 301.3111 | 219.4051 | 195.4278 | 215.3176 | 176.9714 | 174.7802 | 134.7219  | 323.3635 | 319.2802 | 349.1005 | -0.61601 | 3.43E-05 | -0.98271  | 7.93E-11 | 0.028643 | 0.943154 |
| AT4G34620 | SSR16     | 2924.704 | 2856.578 | 2964.18  | 2948.359 | 3151.357 | 2322.923 | 2643.01  | 2219.277 | 5099.909  | 2571.555 | 2131.195 | 3546.944 | -0.066   | 0.055212 | 0.178491  | 0.607695 | -0.07975 | 0.903199 |
| AT4G34630 | AT4G34630 | 196.1692 | 258.7157 | 233.0654 | 643.7807 | 626.0316 | 445.5878 | 382.4005 | 357.1126 | 610.1537  | 215.8955 | 210.1928 | 225.8276 | 1.280567 | 2.99E-09 | 0.942465  | 2.66E-05 | -0.07036 | 0.896697 |
| AT4G34640 | SQS1      | 611.0966 | 717.2669 | 633.5259 | 568.7211 | 579.6589 | 589.1329 | 558.4826 | 567.4961 | 517.4104  | 498.9585 | 443.0012 | 615.3285 | -0.17037 | 0.288324 | -0.24905  | 0.121613 | -0.3226  | 0.132023 |
| AT4G34650 | SQS2      | 78.46766 | 74.98333 | 101.7247 | 22.68286 | 23.84882 | 18.93997 | 35.57214 | 22.65669 | 19.52492  | 138.1731 | 141.0154 | 131.7661 | -1.8534  | 8.21E-14 | -1.61544  | 6.06E-10 | 0.663572 | 0.033486 |
| AT4G34660 | AT4G34660 | 316.2484 | 215.8938 | 283.284  | 249.9238 | 291.4856 | 254.1944 | 295.2488 | 254.618  | 305.565   | 257.1555 | 239.4601 | 281.7600 | -0.05467 | 0.839682 | -0.058263 | 0.806721 | -0.07413 | 0.853499 |
| AT4G34670 | RP53AB    | 2900.926 | 2942.222 | 3135.438 | 3049.813 | 3267.289 | 2893.829 | 2309.521 | 2775.984 | 3087.866  | 2672.307 | 2218.997 | 2767.942 | 0.036571 | 0.844209 | -0.13408  | 0.433857 | -0.22569 | 0.325102 |
| AT4G34680 | GATA3     | 130.7794 | 164.1506 | 139.0667 | 177.3387 | 189.4656 | 183.4187 | 196.5361 | 143.4924 | 134.7219  | 127.6182 | 122.3907 | 139.8474 | 0.342941 | 0.090821 | 0.13991   | 0.575157 | -0.13905 | 0.735625 |
| AT4G34690 | AT4G34690 | 0        | 0        | 0        | 0.412416 | 0        | 0        | 0        | 0        | 0         | 0        | 0        | 0        | 0.095918 | NA       | 0         | NA       | 0        | NA       |
| AT4G34695 | AT4G34695 | 0        | 0        | 0        | 0        | 0        | 0        | 0        | 0        | 0         | 0        | 0        | 0        | #N/A     | #N/A     | #N/A      | #N/A     | #N/A     | #N/A     |
| AT4G34700 | CIB22     | 626.5524 | 604.8594 | 663.142  | 867.7224 | 975.8143 | 750.6211 | 608.2836 | 599.8628 | 928.4099  | 665.9177 | 638.5603 | 646.4057 | 0.444083 | 0.017355 | 0.168878  | 0.451051 | 0.040775 | 0.930902 |
| AT4G34710 | SPE2      | 922.5895 | 717.2669 | 669.5803 | 510.1581 | 484.926  | 739.6559 | 414.4154 | 541.6027 | 384.6409  | 618.9005 | 606.6323 | 594.6103 | -0.40695 | 0.053685 | -0.76541  | 0.000148 | -0.33537 | 0.305371 |
| AT4G34720 | VHA-C3    | 1251.916 | 1290.01  | 1198.806 | 984.436  | 1079.159 | 943.0114 | 892.8607 | 870.6642 | 1386.269  | 1199.42  | 1058.946 | 1040.05  | -0.30781 | 0.106765 | -0.24234  | 0.240305 | -0.17694 | 0.597332 |
| AT4G34730 | AT4G34730 | 505.2842 | 569.1745 | 524.0753 | 385.1961 | 374.294  | 303.0396 | 355.7214 | 324.7459 | 507.6479  | 568.0451 | 560.0706 | 637.0825 | -0.56998 | 0.001753 | -0.41629  | 0.032924 | 0.14233  | 0.694775 |
| AT4G34740 | A5E2      | 455.3502 | 371.1232 | 330.9272 | 220.2299 | 233.1885 | 240.2386 | 267.6803 | 271.8803 | 253.824   | 258.1151 | 297.9948 | 367.7468 | -0.72897 | 1.77E-05 | -0.53621  | 0.002836 | -0.32121 | 0.243984 |
| AT4G34750 | AT4G34750 | 115.3237 | 121.3287 | 124.9025 | 150.1193 | 186.1533 | 136.5672 | 128.0597 | 103.5734 | 173.7718  | 131.4564 | 143.6761 | 155.386  | 0.378851 | 0.105054 | 0.162169  | 0.564975 | 0.243096 | 0.556655 |
| AT4G34760 | AT4G34760 | 233.0522 | 299.7533 | 221.4765 | 178.1635 | 185.4908 | 132.5798 | 96.04478 | 97.10009 | 143.5082  | 256.196  | 243.4511 | 284.8743 | -0.57043 | 0.00674  | -1.11974  | 6.59E-08 | 0.064042 | 0.89707  |
| AT4G34770 | AT4G34770 | 48.74506 | 35.68492 | 39.91728 | 20.20836 | 11.92441 | 14.92561 | 14.22886 | 9.710009 | 8.786214  | 33.58375 | 27.93701 | 41.43626 | -1.26564 | 0.000191 | -1.72064  | 2.63E-06 | -0.2526  | 0.711499 |
| AT4G34780 | AT4G34780 | 1.188904 | 0        | 0        | 0        | 0        | 0        | 0        | 0        | 0         | 0        | 0        | 0        | -0.2184  | NA       | -0.20558  | NA       | -0.19918 | NA       |
| AT4G34790 | AT4G34790 | 35.66712 | 33.90067 | 32.19136 | 22.68286 | 21.19895 | 8.971567 | 10.67164 | 14.02557 | 24.40615  | 32.62421 | 30.59768 | 37.29264 | -0.79964 | 0.035915 | -0.94232  | 0.019446 | -0.00977 | 0.992795 |
| AT4G34800 | AT4G34800 | 4.755616 | 1.784246 | 2.575309 | 7.011065 | 7.28714  | 4.984204 | 5.335821 | 6.47334  | 3.904984  | 1.919071 | 7.982004 | 6.071813 | 0.707428 | 0.271963 | 0.45048   | 0.540127 | 0.132637 | NA       |
| AT4G34810 | AT4G34810 | 1.188904 | 0        | 0        | 0.412416 | 0        | 6.624673 | 5.981045 | 3.557214 | 2.15778   | 10.73871 | 2.878607 | 2.660668 | 1.386737 | 0.026932 | 1.370649  | 0.035367 | 1.04474  | NA       |
| AT4G34830 | MRL1      | 1264.994 | 1250.756 | 1161.464 | 619.4482 | 541.8982 | 699.7822 | 1156.984 | 1309.772 | 742.9232  | 1276.182 | 1289.094 | 1197.508 | -0.95957 | 1.92E-07 | -0.19155  | 0.408063 | 0.032472 | 0.94936  |
| AT4G34840 | MTN2      | 49.93397 | 55.31163 | 79.83457 | 90.73143 | 106.6572 | 113.663  | 76.4801  | 67.97007 | 74.1947   | 69.08657 | 75.82904 | 71.47755 | 0.702987 | 0.002411 | 0.226856  | 0.441861 | 0.270206 | 0.663474 |
| AT4G34850 | PKNS      | 8.322328 | 3.568492 | 6.438272 | 0.412416 | 1.987402 | 1.993682 | 1.778607 | 1.07889  | 0         | 10.55489 | 5.321336 | 12.43088 | -1.37458 | 0.02594  | -1.43792  | 0.05206  | 0.504427 | NA       |
| AT4G34860 | INVB      | 43.98945 | 62.44861 | 50.21852 | 68.04857 | 76.8462  | 86.72515 | 52.46891 | 58.26006 | 46.85981  | 60.45074 | 22.61568 | 46.61579 | 0.540908 | 0.077089 | 0.020498  | 0.962781 | -0.21322 | 0.735214 |
| AT4G34870 | CYP18-4   | 1506.341 | 1372.085 | 1579.952 | 1806.793 | 2064.91  | 1442.429 | 1328.619 | 1200.805 | 2391.1803 | 1460.413 | 1277.121 | 200.6519 | 0.242597 | 0.404162 | 0.136119  | 0.679644 | 0.085491 | 0.884912 |
| AT4G34880 | AT4G34880 | 1.188904 | 1.784246 | 2.575309 | 4.948987 | 3.974804 | 3.987363 | 1.14428  | 4.31556  | 3.904984  | 0        | 2.660668 | 0        | 0.730511 | 0.28318  | 0.877743  | 0.208699 | -0.46213 | NA       |
| AT4G34881 | AT4G34881 | 369.7491 | 362.2019 | 364.4062 | 355.9146 | 461.0772 | 364.8437 | 485.5597 | 468.2382 | 663.8473  | 324.323  | 297.9948 | 351.1723 | 0.105431 | 0.627907 | 0.549669  | 0.002355 | -0.16646 | 0.627824 |
| AT4G34890 | XDH1      | 624.1746 | 640.5443 | 527.9383 | 454.482  | 379.5937 | 499.4172 | 578.9366 | 679.7007 | 343.6386  | 560.3688 | 498.8752 | 494.1274 | -0.4134  | 0.076419 | -0.15642  | 0.575876 | -0.19857 | 0.639778 |
| AT4G34900 | XDH2      | 319.8152 | 292.6163 | 339.9407 | 106.4032 | 97.38269 | 117.6272 | 130.7276 | 172.6224 | 80.05217  | 373.2594 | 337.9048 | 309.7361 | -1.51992 | 5.94E-13 | -1.27287  | 3.91E-09 | 0.096551 | 0.849248 |
| AT4G34910 | RH16      | 121.2682 | 119.5445 | 145.9467 | 127.4364 | 123.2189 | 132.5798 | 121.8346 | 158.5968 | 119.102   | 128.5778 | 125.0514 | 150.2066 | -0.00315 | 0.990691 | 0.053441  | 0.844524 | 0.075618 | 0.868176 |
| AT4G34920 | AT4G34920 | 752.5762 | 892.123  | 813.7975 | 693.683  | 661.1423 | 704.7664 | 930.2114 | 879.2953 | 1033.845  | 926.9114 | 887.3328 | 890.8796 | -0.25021 | 0.039736 | 0.211921  | 0.100817 | 0.140701 | 0.505558 |
| AT4G34930 | AT4G34930 | 40.42273 | 48.17464 | 57.94445 | 42.4788  | 49.02258 | 59.81045 | 64.91915 | 60.04896 | 75.17094  | 47.97678 | 53.21336 | 58.81077 | 0.018072 | 0.960598 | 0.492252  | 0.084726 | 0.11342  | 0.855952 |
| AT4G34940 | ARO1      | 2.377808 | 0        | 1.287654 | 0        | 0.662467 | 0        | 1.778607 | 1.07889  | 1.952492  | 3.838143 | 7.982004 | 2.071813 | -0.7314  | 0.283897 | 0.108983  | 0.899772 | 0.957922 | NA       |
| AT4G34950 | AT4G34950 | 1576.487 | 1650.428 | 1202.669 | 1537.898 | 1550.173 | 1708.585 | 2631.449 | 2960.474 | 2788.159  | 1007.512 | 1113.49  | 1201.652 | 0.113757 | 0.503704 | 0.908774  | 1.82E-11 | -0.90803 | 0.034516 |
| AT4G34960 | CYP21-1   | 198.547  | 180.2088 | 262.6815 | 258.997  | 276.2489 | 219.305  | 193.8682 | 197.4369 | 178.653   | 211.0978 | 239.4601 | 243.438  | 0.228059 | 0.245428 | -0.17416  | 0.431575 | 0.102312 | 0.79265  |
| AT4G34970 | ADF9      | 30.9115  | 16.05821 | 21.89012 | 30.93117 | 23.84882 | 34.88943 | 32.90423 | 28.05114 | 30.26363  | 23.02886 | 26.60668 | 35.22082 | 0.305342 | 0.442629 | 0.339634  | 0.422297 | 0.239942 | 0.743519 |
| AT4G34975 | AT4G34975 | 0        | 0        | 0        | 0        | 0        | 0        | 0        | 0        | 0         | 0        | 0        | 0        | #N/A     | #N/A     | #N/A      | #N/A     | #N/A     | #N/A     |
| AT4G34980 | SBT1.6    | 1056.936 | 858.2223 | 804.784  | 349.7284 | 304.0725 | 346.9006 | 324.5998 | 386.2426 | 319.2324  | 659.201  | 610.6233 | 603.9335 | -1.42323 | 5.3E-25  | -1.38335  | 5.09E-22 | -0.53114 | 0.003314 |
| AT4G34990 | MYB32     | 34.47821 | 21.41095 | 30.9037  | 25.15735 | 38.4231  | 18.93997 | 38.84004 | 49.9786  | 38.84004  | 49.9786  | 38.84004 | 40.0035  | -0.07995 | 0.857318 | 0.512164  | 0.175862 | 0.270158 | 0.75068  |
| AT4G35000 | APX3      | 1257.86  | 1379.222 | 1341.736 | 1359.322 | 1487.901 | 1375.64  | 1256.586 | 1425.214 | 1943.706  | 1345.269 | 1274.46  | 1263.806 | 0.084978 | 0.668591 | 0.214042  | 0.244764 | -0.03364 | 0.934757 |
| AT4G35010 | BGAL11    | 3.566712 | 1.136984 | 3.862963 | 0.824831 | 0.662467 | 0.996841 | 0        | 0.976246 | 0.995936  | 2.660668 | 1.035907 | 0        | -1.31801 | 0.041171 | -1.54773  | 0.016015 | -0.93999 | NA       |
| AT4G35020 | ARAC3     | 277.0104 | 206.9625 | 272.9827 | 458.6061 | 480.2888 | 398.7363 | 300.5846 | 293.4581 | 421.7383  | 246.6007 | 258.0848 | 290.0538 | 0.79727  | 1.19E-05 | 0.406351  | 0.046620 | 0.060606 | 0.8948   |
| AT4G35025 | AT4G35025 | 0        | 0        | 0        | 0        | 0        | 0        | 0        | 0        | 0         | 0        | 0        | 0        | #N/A     | #N/A     | #N/A      | #N/A     | #N/A     | #N/A     |
| AT4G35030 | AT4G35030 | 26.15589 | 26.76369 | 34.76667 | 25.98218 | 29.14856 | 31.8989  | 28.45771 | 18.34113 | 21.47741  | 47.01725 | 31.92802 | 34.18492 | -0.03089 | 0.946482 | -0.32635  | 0.431403 | 0.349829 | 0.564516 |
| AT4G35040 | bZIP1     | 243.7253 | 230.1677 | 211.1753 | 230.9527 | 245.7754 | 191.3934 | 214.3221 | 215.778  | 272.3726  | 223.5718 | 220.8354 | 175.0682 | -0.02923 | 0.904999 | 0.035219  | 0.891209 | -0.14381 | 0.694277 |
| AT4G35050 | MSI9      | 159.3131 | 149.8767 | 121.0395 | 141.4585 | 128.5187 | 128.5923 | 131.6169 | 149.9657 | 164.0093  | 150.6471 | 139.6851 | 127.4165 | -0.10127 | 0.656992 | 0.04903   | 0.852509 | -0.03925 | 0.935568 |
| AT4G35060 | HIPP25    | 38.04493 | 41.03766 | 46.35556 | 41.24156 | 40.4105  | 27.91154 | 20.45398 | 23.73558 | 45.88356  | 67.16749 | 47.89202 | 47.65117 | -0.16097 | 0.69319  | -0.44043  | 0.261152 | 0.357329 | 0.552524 |
| AT4G35070 | AT4G35070 | 63.01191 | 48.17464 | 65.67037 | 105.5784 | 112.6194 | 86.72515 | 76.4801  | 103.5734 | 117.495   | 53.734   | 69.17737 | 44.54398 | 0.745914 | 0.003779 | 0.697601  | 0.009074 | -0.10306 | 0.869881 |
| AT4G35080 | AT4G35080 | 274.6368 | 251.5787 | 220.1889 | 222.7044 | 233.8    |          |          |          |           |          |          |          |          |          |           |          |          |          |

|           |             |          |          |          |           |          |           |          |          |          |          |          |          |          |          |           |          |           |          |
|-----------|-------------|----------|----------|----------|-----------|----------|-----------|----------|----------|----------|----------|----------|----------|----------|----------|-----------|----------|-----------|----------|
| AT4G35590 | RK05        | 5.94452  | 3.568492 | 2.573099 | 13.1973   | 11.26194 | 8.971567  | 10.67164 | 15.10446 | 11.71495 | 1.919071 | 6.65167  | 1.035907 | 1.106182 | 0.044558 | 1.201558  | 0.035318 | -0.30024  | NA       |
| AT4G35600 | CONNEXIN 31 | 127.2127 | 164.1506 | 112.0259 | 294.8771  | 261.6746 | 312.0112  | 285.4664 | 319.3514 | 185.4867 | 109.3871 | 119.7301 | 118.0933 | 1.080642 | 3.84E-07 | 0.94789   | 1.51E-05 | -0.19958  | 0.657798 |
| AT4G35610 | AT4G35610   | 0        | 0        | 0        | 0         | 0        | 0         | 0        | 0        | 0        | 0        | 0        | 0        | #N/A     | #N/A     | #N/A      | #N/A     | #N/A      | #N/A     |
| AT4G35620 | CYCB2-2     | 60.6341  | 73.15409 | 81.12222 | 124.1371  | 131.831  | 132.5798  | 133.3955 | 90.62675 | 78.09968 | 107.468  | 114.4087 | 98.41112 | 0.823442 | 0.000377 | 0.479347  | 0.067348 | 0.552265  | 0.117114 |
| AT4G35630 | PSAT1       | 403.0384 | 421.0821 | 408.1864 | 606.2509  | 671.0793 | 675.858   | 1079.614 | 996.8943 | 1126.588 | 490.3227 | 510.8482 | 416.4344 | 0.655436 | 1.28E-07 | 1.365272  | 1.19E-30 | 0.198583  | 0.372189 |
| AT4G35640 | SAT4        | 11.88904 | 14.27397 | 9.01358  | 5.61402   | 9.274542 | 7.974726  | 4.46517  | 6.47334  | 3.904984 | 16.31211 | 21.28534 | 16.5745  | -0.54669 | 0.297342 | -0.964548 | 0.057292 | 0.560488  | NA       |
| AT4G35650 | IDH3        | 0        | 0        | 0        | 0.248381  | 0        | 0         | 2.66791  | 3.23667  | 0        | 0        | 0        | 1.035907 | 0.109967 | NA       | 0.802673  | NA       | 0.154398  | NA       |
| AT4G35655 | AT4G35655   | 0        | 0        | 0        | 0.262078  | 1.324935 | 0         | 1.778607 | 0        | 0.976246 | 0        | 0        | 0        | 0.594676 | NA       | 0.44244   | NA       | 0         | NA       |
| AT4G35660 | AT4G35660   | 1.188904 | 0        | 0        | 0         | 0.662467 | 0         | 1.778607 | 0        | 0        | 1.919071 | 0        | 1.035907 | -0.14942 | NA       | 0.084322  | NA       | 0.261132  | NA       |
| AT4G35670 | AT4G35670   | 0        | 0        | 0        | 0         | 0        | 0         | 0        | 0        | 0        | 0        | 0        | 0        | #N/A     | #N/A     | #N/A      | #N/A     | #N/A      | #N/A     |
| AT4G35680 | AT4G35680   | 74.90095 | 80.29107 | 109.4506 | 86.60727  | 96.05775 | 99.68408  | 83.59453 | 70.12785 | 106.4108 | 99.79171 | 87.80204 | 96.33931 | 0.079312 | 0.787124 | -0.02507  | 0.940894 | 0.09804   | 0.855952 |
| AT4G35690 | AT4G35690   | 0        | 0        | 0        | 0         | 0.662467 | 0         | 0        | 3.23667  | 1.952492 | 0.995936 | 6.65167  | 0        | 0.00128  | 0.9991   | 0.655317  | 0.288259 | 0.853567  | NA       |
| AT4G35700 | AT4G35700   | 0        | 0        | 0        | 0         | 0.662467 | 0         | 0        | 0        | 0        | 0        | 0        | 0        | 0.128567 | NA       | 0         | NA       | 0         | NA       |
| AT4G35710 | AT4G35710   | 0        | 0        | 0        | 0         | 0        | 0.889303  | 0        | 0        | 0        | 0        | 0        | 0        | 0.160764 | NA       | 0         | NA       | 0         | NA       |
| AT4G35720 | AT4G35720   | 2.377808 | 1.784246 | 3.862963 | 1.649662  | 0        | 2.990522  | 1.778607 | 4.31556  | 0.976246 | 3.838143 | 0        | 3.10772  | -0.43095 | 0.563839 | -0.10778  | 0.902894 | -0.0744   | NA       |
| AT4G35725 | AT4G35725   | 0        | 0        | 0        | 1.287654  | 0        | 0         | 0        | 0        | 0        | 0        | 0        | 0        | -0.2184  | NA       | -0.20558  | NA       | -0.19918  | NA       |
| AT4G35730 | AT4G35730   | 122.4571 | 117.7602 | 137.779  | 120.4253  | 83.47088 | 158.4977  | 104.9378 | 105.7312 | 85.90965 | 151.6066 | 151.6581 | 126.3806 | -0.07315 | 0.812676 | -0.33918  | 0.22153  | 0.174309  | 0.718643 |
| AT4G35731 | AT4G35731   | 0        | 0        | 0        | 0         | 0.662467 | 0         | 0        | 0        | 0        | 0        | 0        | 0        | 0.128567 | NA       | 0         | NA       | 0         | NA       |
| AT4G35732 | AT4G35732   | 1.188904 | 0        | 0        | 0         | 0        | 0         | 0        | 0        | 0.959536 | 0        | 0        | 0        | -0.21179 | NA       | -0.19779  | NA       | -0.02864  | NA       |
| AT4G35740 | RECQL3      | 84.41218 | 90.99655 | 79.83457 | 87.01969  | 82.80841 | 78.75042  | 82.70522 | 84.15342 | 72.2422  | 76.76285 | 69.17737 | 94.26749 | -0.024   | 0.935373 | -0.08599  | 0.773012 | -0.07213  | 0.89016  |
| AT4G35750 | AT4G35750   | 756.1429 | 999.1778 | 739.1136 | 1214.6564 | 1087.771 | 1178.2616 | 1273.483 | 1386.374 | 1576.637 | 711.0159 | 599.9806 | 640.1902 | 0.477756 | 0.001738 | 0.756683  | 2.79E-07 | -0.34292  | 0.133779 |
| AT4G35760 | LOT1        | 721.6647 | 842.1641 | 829.2494 | 561.6166  | 675.1767 | 671.8707  | 899.9751 | 837.2186 | 931.7616 | 902.923  | 983.1168 | 916.7773 | -0.25546 | 0.026175 | -0.104927 | 0.441277 | 0.227799  | 0.178959 |
| AT4G35770 | STR15       | 334.082  | 595.9382 | 361.8309 | 98.56732  | 109.9696 | 188.4029  | 257.898  | 334.4559 | 299.7075 | 296.4965 | 371.1632 | 392.6086 | -1.62825 | 1.17E-10 | -0.50463  | 0.081157 | -0.26713  | 0.589239 |
| AT4G35780 | AT4G35780   | 241.3475 | 210.541  | 244.6543 | 226.4162  | 205.3649 | 242.2323  | 275.6841 | 245.9869 | 248.9427 | 217.8146 | 199.5501 | 220.6481 | -0.05712 | 0.768128 | 0.138852  | 0.454956 | -0.1281   | 0.676076 |
| AT4G35783 | RTFL6       | 3.566712 | 1.784246 | 2.575309 | 2.062078  | 1.987402 | 1.993682  | 0.889303 | 1.07889  | 6.833722 | 0.995936 | 2.660668 | 5.179533 | -0.23276 | 0.771643 | 0.066364  | 0.941322 | 0.060143  | NA       |
| AT4G35785 | AT4G35785   | 329.3264 | 367.5547 | 355.3926 | 506.8587  | 551.1728 | 507.392   | 402.8545 | 405.6626 | 435.4057 | 391.4905 | 400.4305 | 366.7109 | 0.571433 | 1.51E-06 | 0.242413  | 0.097901 | 0.139769  | 0.552524 |
| AT4G35790 | PLDELTA     | 195.4455 | 96.7292  | 866.5914 | 741.5232  | 753.8878 | 857.2831  | 1012.917 | 1089.679 | 854.2152 | 762.8308 | 858.0654 | 782.1094 | -0.23161 | 0.102397 | 0.096667  | 0.564293 | -0.20006  | 0.372189 |
| AT4G35800 | NRB1        | 1532.497 | 1181.171 | 973.4667 | 614.9116  | 541.8982 | 706.7601  | 762.1331 | 889.0053 | 512.5291 | 918.2756 | 1136.105 | 785.2171 | -0.95094 | 2.24E-05 | -0.74249  | 0.001463 | -0.3649   | 0.330773 |
| AT4G35810 | AT4G35810   | 8.323228 | 16.05821 | 24.46543 | 20.20836  | 19.21155 | 25.91786  | 8.003731 | 7.55223  | 6.833722 | 14.39303 | 5.321336 | 12.43088 | 0.380706 | 0.447996 | -0.91053  | 0.074886 | -0.46452  | NA       |
| AT4G35820 | P4H11       | 0        | 0        | 0        | 0         | 0        | 0         | 2.66791  | 0        | 0        | 0        | 0        | 0        | 0        | NA       | 0.335767  | NA       | 0         | NA       |
| AT4G35830 | ACO1        | 4551.124 | 4398.166 | 3940.222 | 2275.709  | 2051.661 | 2853.955  | 3599.011 | 4087.914 | 2558.741 | 4015.657 | 3907.191 | 3866.003 | -0.82614 | 2.48E-06 | -0.32404  | 0.105904 | -0.12591  | 0.735625 |
| AT4G35837 | AT4G35837   | 0        | 0        | 0        | 0         | 0        | 0         | 0        | 0        | 0        | 0        | 0        | 0        | #N/A     | #N/A     | #N/A      | #N/A     | #N/A      | #N/A     |
| AT4G35840 | NIP1        | 70.14533 | 71.36984 | 59.2321  | 79.18379  | 89.43308 | 81.74094  | 72.92289 | 63.65451 | 76.14719 | 54.69353 | 51.88302 | 77.69299 | 0.310823 | 0.224205 | 0.086952  | 0.79374  | -0.10777  | 0.850064 |
| AT4G35850 | AT4G35850   | 218.7583 | 239.089  | 256.2432 | 306.4248  | 265.6494 | 349.8911  | 316.592  | 286.9847 | 258.7052 | 273.4677 | 220.8354 | 277.6229 | 0.358177 | 0.043569 | 0.269514  | 0.169699 | -0.115658 | 0.750218 |
| AT4G35860 | RAB18       | 238.9697 | 269.4212 | 227.9148 | 257.3473  | 286.1859 | 244.226   | 262.3445 | 262.1703 | 311.4225 | 304.1728 | 296.6645 | 292.1256 | 0.104462 | 0.56138  | 0.186594  | 0.293086 | 0.280683  | 0.238883 |
| AT4G35870 | GF510       | 139.1018 | 107.0548 | 104.3    | 74.2348   | 80.15854 | 113.6398  | 88.93035 | 120.8357 | 84.9334  | 112.2657 | 103.766  | 105.6625 | -0.40109 | 0.106516 | -0.25145  | 0.374096 | -0.12359  | 0.810892 |
| AT4G35880 | AT4G35880   | 170.0133 | 89.2123  | 149.3679 | 81.65828  | 98.70762 | 81.74094  | 92.48756 | 87.39009 | 67.36097 | 125.6992 | 155.6491 | 122.237  | -0.63248 | 0.009579 | -0.71142  | 0.004886 | -0.03854  | 0.952456 |
| AT4G35890 | LARP1C      | 436.3277 | 265.8527 | 302.5988 | 236.3141  | 255.7124 | 259.1786  | 277.4627 | 274.038  | 298.7313 | 239.8839 | 240.7904 | 239.2944 | -0.42213 | 0.022741 | -0.24446  | 0.242796 | -0.47921  | 0.058147 |
| AT4G35900 | FD          | 24.96698 | 42.8219  | 21.89012 | 24.33252  | 31.8989  | 23.12189  | 28.05114 | 40.02609 | 38.38143 | 39.91002 | 24.86176 | 0        | 0.012283 | 0.979872 | 0.052857  | 0.917026 | -0.09287  | 0.778754 |
| AT4G35905 | AT4G35905   | 89.1678  | 73.15409 | 87.5605  | 112.5895  | 151.0425 | 98.68724  | 96.93408 | 99.25787 | 174.748  | 118.9824 | 187.5771 | 106.6984 | 0.499778 | 0.107918 | 0.528628  | 0.102866 | 0.668374  | 0.119789 |
| AT4G35910 | CTU2        | 128.4016 | 121.3287 | 140.3543 | 112.177   | 116.5942 | 126.6114  | 136.6304 | 124.0723 | 110.3158 | 115.1443 | 147.6671 | 148.1346 | -0.15746 | 0.475363 | -0.07553  | 0.773092 | 0.063324  | 0.889374 |
| AT4G35920 | MCA1        | 473.1838 | 449.63   | 495.7469 | 318.7972  | 329.2462 | 363.8469  | 372.6182 | 308.5625 | 303.6125 | 520.0683 | 427.0372 | 495.1633 | -0.48739 | 0.000612 | -0.51894  | 0.000382 | 0.025096  | 0.948148 |
| AT4G35930 | AT4G35930   | 79.65656 | 60.66437 | 65.67037 | 54.02644  | 58.95959 | 34.89943  | 54.24751 | 38.84004 | 46.85981 | 58.53167 | 55.87403 | 51.79533 | -0.44002 | 0.115833 | -0.5334   | 0.707534 | -0.3039   | 0.537149 |
| AT4G35940 | AT4G35940   | 93.92341 | 82.07532 | 88.84815 | 148.4696  | 113.9444 | 174.4471  | 155.6281 | 157.5179 | 191.3442 | 83.4796  | 99.77505 | 101.5188 | 0.684588 | 0.001644 | 0.893885  | 3.52E-05 | 0.089504  | 0.866649 |
| AT4G35950 | ARAC6       | 230.6474 | 204.8732 | 278.1333 | 249.5114  | 243.1255 | 212.3271  | 175.1928 | 161.8335 | 197.2017 | 270.589  | 224.8264 | 275.5111 | -0.08131 | 0.688463 | -0.47939  | 0.005615 | 0.043634  | 0.915494 |
| AT4G35960 | APX5        | 13.07794 | 3.568492 | 12.87654 | 7.42348   | 5.299738 | 11.96209  | 5.335821 | 3.23667  | 6.833722 | 20.15025 | 9.312338 | 10.35907 | -0.28274 | 0.652701 | -0.73466  | 0.22811  | 0.330079  | 0.312949 |
| AT4G35980 | AT4G35980   | 95.11232 | 92.78079 | 153.2309 | 176.9263  | 214.6394 | 163.4819  | 145.8458 | 132.7035 | 202.829  | 158.3234 | 271.3881 | 146.0628 | 0.660017 | 0.020104 | 0.461534  | 0.142179 | 0.701518  | 0.074099 |
| AT4G35985 | AT4G35985   | 34.47821 | 39.25341 | 40.42959 | 54.02644  | 76.18374 | 68.8201   | 55.13682 | 57.18117 | 65.40848 | 24.94793 | 15.96401 | 36.25673 | 0.728437 | 0.013286 | 0.580296  | 0.071242 | -0.51895  | 0.318788 |
| AT4G35987 | AT4G35987   | 63.01191 | 85.64381 | 70.82925 | 61.44992  | 64.25933 | 77.75358  | 87.15174 | 75.5223  | 48.8123  | 65.24842 | 58.53469 | 68.36983 | -0.10435 | 0.749652 | -0.0352   | 0.925601 | -0.16532  | 0.766854 |
| AT4G36000 | AT4G36000   | 0        | 0        | 1.287654 | 1.237247  | 1.324935 | 1.993682  | 4.46517  | 2.15778  | 2.928738 | 0        | 0        | 1.035907 | 0.458656 | 0.520113 | 0.1061945 | 0.108917 | -0.09788  | NA       |
| AT4G36010 | AT4G36010   | 33.28931 | 10.70548 | 30.9037  | 49.90228  | 62.93439 | 44.85784  | 80.03731 | 64.7334  | 108.3633 | 23.98839 | 22.61568 | 34.18492 | 0.935199 | 0.006008 | 1.575152  | 1.25E-06 | 0.048983  | 0.960136 |
| AT4G36020 | CSP1        | 192.6024 | 162.3664 | 122.3272 | 168.678   | 172.904  | 138.5609  | 122.7239 | 131.6246 | 200.1304 | 138.1731 | 162.3007 | 129.8483 | 0.012772 | 0.968814 | -0.06928  | 0.834365 | -0.14967  | 0.766613 |
| AT4G36030 | AR03        | 3.566712 | 3.568492 | 3.862963 | 9.485558  | 6.977885 | 3.557214  | 4.31556  | 10.73871 | 0.995936 | 5.321336 | 3.10772  | 0        | 1.159088 | 0.049466 | 0.482614  |          |           |          |

|           |           |           |          |          |          |          |          |          |          |          |          |          |           |          |          |           |          |           |          |    |
|-----------|-----------|-----------|----------|----------|----------|----------|----------|----------|----------|----------|----------|----------|-----------|----------|----------|-----------|----------|-----------|----------|----|
| AT4G36540 | BEE2      | 934.4785  | 961.7086 | 1004.37  | 681.3105 | 730.7014 | 616.0476 | 626.0697 | 621.4406 | 566.2227 | 984.4836 | 1118.811 | 897.0951  | -0.50836 | 4.77E-05 | -0.66979  | 7.78E-08 | 0.046661  | 0.877489 |    |
| AT4G36550 | PUB5      | 229.4585  | 144.5239 | 137.779  | 127.4364 | 123.8814 | 210.3334 | 199.204  | 201.7524 | 133.7457 | 120.9015 | 168.9524 | 159.5296  | -0.15764 | 0.639429 | 0.054247  | 0.889873 | -0.18682  | 0.744139 |    |
| AT4G36560 | AT4G36560 | 0         | 0        | 0        | 0        | 0        | 0        | 0        | 0        | 0        | 0        | 0        | 0         | 0        | NA       | 0         | NA       | 0.172362  | NA       |    |
| AT4G36570 | ATRL3     | 13.07794  | 12.48972 | 11.58889 | 15.25938 | 15.89921 | 11.96209 | 8.893035 | 6.47334  | 0        | 12.6912  | 11.51443 | 7.982004  | 16.5745  | 0.20836  | 0.705023  | -0.33276 | 0.568049  | -0.01778 | NA |
| AT4G36580 | AT4G36580 | 47.55616  | 28.54794 | 47.64321 | 35.46774 | 44.38531 | 37.87995 | 45.35448 | 50.70783 | 41.00233 | 35.50282 | 29.26735 | 29.00538  | -0.09556 | 0.787705 | 0.110876  | 0.780549 | -0.39483  | 0.459359 |    |
| AT4G36590 | AT4G36590 | 0         | 1.784246 | 2.575309 | 0        | 3.312336 | 0        | 5.353821 | 1.07889  | 2.928738 | 2.878607 | 1.330334 | 0         | -0.14761 | 0.859349 | -0.474167 | 0.512469 | -0.00488  | NA       |    |
| AT4G36600 | AT4G36600 | 0         | 0        | 0        | 0        | 0        | 0        | 1.778607 | 0        | 0        | 1.919701 | 1.330334 | 0         | 0        | NA       | 0.293017  | 0        | 0.483386  | NA       |    |
| AT4G36610 | AT4G36610 | 5.94452   | 3.568492 | 2.575309 | 4.124156 | 3.312336 | 1.993682 | 5.57214  | 1.07889  | 2.928738 | 2.878607 | 2.660668 | 2.071813  | -0.18434 | 0.81498  | -0.40098  | 0.606963 | -0.40692  | NA       |    |
| AT4G36620 | GATA19    | 2.377808  | 8.92123  | 3.862963 | 4.124156 | 4.637271 | 3.987363 | 4.446517 | 2.15778  | 1.952492 | 6.716749 | 9.312338 | 13.46678  | -0.12148 | 0.87275  | -0.45972  | 0.527078 | 0.799157  | 0.752892 |    |
| AT4G36630 | EMB2754   | 414.9275  | 340.791  | 324.4889 | 193.4229 | 208.0147 | 280.1123 | 267.6803 | 299.9314 | 248.9427 | 335.8375 | 316.6195 | 342.8851  | -0.66598 | 0.00014  | -0.39891  | 0.037264 | -0.11713  | 0.752892 |    |
| AT4G36635 | AT4G36635 | 0         | 0        | 0        | 0        | 0        | 0        | 0        | 0        | 0        | 0        | 0        | 0         | #N/A     | #N/A     | #N/A      | #N/A     | #N/A      | #N/A     |    |
| AT4G36640 | AT4G36640 | 99.86793  | 96.34929 | 95.28642 | 227.6534 | 227.2263 | 208.3397 | 229.4403 | 200.6735 | 228.4416 | 122.8206 | 87.80204 | 113.9497  | 1.162002 | 1.15E-11 | 1.149015  | 4.71E-11 | 0.159854  | 0.679892 |    |
| AT4G36648 | AT4G36648 | 471.9949  | 456.767  | 489.3086 | 1245.907 | 1434.242 | 1253.029 | 1514.484 | 1104.783 | 1245.69  | 498.9585 | 502.8662 | 493.0915  | 1.450264 | 2.11E-27 | 1.426062  | 2.46E-26 | 0.073059  | 0.828997 |    |
| AT4G36650 | ATPBRP    | 143.8574  | 123.113  | 122.3272 | 150.5317 | 147.7302 | 153.5135 | 149.403  | 158.5968 | 170.843  | 113.2252 | 113.0784 | 112.9138  | 0.203298 | 0.284904 | 0.285387  | 0.141399 | -0.20073  | 0.545466 |    |
| AT4G36660 | AT4G36660 | 209.2471  | 269.4212 | 216.3259 | 197.5471 | 229.8761 | 199.3682 | 155.6281 | 157.5179 | 192.3205 | 279.2249 | 297.9948 | 242.4021  | -0.13679 | 0.502224 | -0.44408  | 0.018337 | -0.240578 | 0.418001 |    |
| AT4G36670 | PLT6      | 185.469   | 219.4623 | 124.9025 | 681.7229 | 606.1576 | 694.798  | 604.7264 | 677.5429 | 661.8948 | 68.35821 | 90.46271 | 107.7343  | 1.874183 | 3.37E-28 | 1.845735  | 3.83E-27 | -0.8539   | 0.000325 |    |
| AT4G36680 | AT4G36680 | 187.8468  | 107.0548 | 137.779  | 102.1622 | 155.0173 | 121.6146 | 102.9453 | 114.3623 | 113.7932 | 120.9015 | 11.79304 | 125.3447  | -0.10498 | 0.707629 | -0.24327  | 0.368516 | -0.35128  | 0.352    |    |
| AT4G36690 | UZAF65A   | 1103.303  | 1149.054 | 1093.219 | 1062.995 | 845.9707 | 933.0643 | 969.3408 | 980.711  | 930.3624 | 1033.42  | 904.6271 | 1073.199  | -0.26163 | 0.030321 | -0.21326  | 0.100147 | -0.14786  | 0.478278 |    |
| AT4G36700 | AT4G36700 | 1.188904  | 0        | 0        | 3.71174  | 3.312336 | 6.977885 | 0        | 1.07889  | 0.976246 | 1.919071 | 0        | 0.2071813 | 1.394286 | 0.026575 | 0.039554  | 0.96356  | 0.395908  | NA       |    |
| AT4G36710 | SCLL5     | 5.53068   | 48.17464 | 34.76667 | 93.61834 | 93.40789 | 100.6809 | 70.25498 | 129.4668 | 107.3871 | 44.13864 | 37.24935 | 34.18492  | 1.019147 | 0.006177 | 1.104347  | 0.61E-05 | -0.22043  | 0.716392 |    |
| AT4G36720 | HVA22K    | 171.33424 | 67.80135 | 92.71111 | 132.7978 | 121.894  | 151.5198 | 144.0672 | 121.9146 | 164.0093 | 96.9131  | 89.13238 | 64.2262   | 0.767211 | 0.000662 | 0.853742  | 0.000191 | 0.095768  | 0.864429 |    |
| AT4G36730 | GBF1      | 466.0503  | 562.0375 | 485.7365 | 437.5729 | 412.0546 | 424.6542 | 363.7251 | 411.0571 | 448.0969 | 554.6116 | 557.4099 | 522.0969  | -0.24029 | 0.0872   | -0.30097  | 0.036479 | -0.113153 | 0.663414 |    |
| AT4G36740 | ATHB-40   | 4.755616  | 3.568492 | 2.575309 | 0.412416 | 1.324935 | 0        | 0.889303 | 2.15778  | 3.904984 | 0.959536 | 3.991002 | 6.215439  | -1.16531 | 0.075825 | -0.36147  | 0.653935 | 0.02731   | NA       |    |
| AT4G36750 | AT4G36750 | 252.0476  | 269.4212 | 261.3932 | 261.8839 | 276.9113 | 258.1818 | 216.99   | 199.5946 | 240.1565 | 249.4793 | 276.7095 | 207.1813  | 0.02855  | 0.892033 | -0.24585  | 0.171735 | -0.09512  | 0.778952 |    |
| AT4G36760 | ATAP11    | 491.0173  | 412.1608 | 408.1864 | 498.198  | 571.7093 | 537.2972 | 552.2575 | 715.304  | 497.8855 | 366.5426 | 355.1992 | 409.1831  | 0.284598 | 1.08292  | 0.417337  | 0.01705  | -0.211    | 0.482624 |    |
| AT4G36770 | UGT72C1   | 13.07794  | 10.70548 | 9.01358  | 3.71174  | 2.649869 | 4.984204 | 6.225124 | 3.23667  | 1.952492 | 6.716749 | 11.97301 | 6.215439  | -1.20027 | 0.028148 | -1.12196  | 0.055953 | -0.34007  | NA       |    |
| AT4G36780 | BEH2      | 259.1811  | 246.226  | 272.9827 | 301.4758 | 288.8357 | 267.1533 | 231.2189 | 305.3259 | 367.0685 | 214.9636 | 235.4691 | 236.1867  | 0.137859 | 0.518019 | 0.206276  | 0.335213 | -0.18405  | 0.60198  |    |
| AT4G36790 | AT4G36790 | 134.3461  | 153.4452 | 153.2309 | 215.2809 | 247.7628 | 206.346  | 190.3109 | 250.3025 | 255.7765 | 129.5373 | 115.7391 | 140.8833  | 0.594417 | 0.001181 | 0.645492  | 0.000554 | -0.17859  | 0.630253 |    |
| AT4G36791 | AT4G36791 | 17.133424 | 1.784246 | 1.287654 | 4.948987 | 3.974804 | 3.987363 | 8.003731 | 7.55223  | 0.976246 | 11.51443 | 5.321336 | 3.10772   | -0.14892 | 0.850664 | 0.378488  | 0.625666 | 0.574625  | NA       |    |
| AT4G36800 | RCE1      | 1500.397  | 154.1589 | 1664.937 | 1299.934 | 1713.804 | 1500.245 | 1657.662 | 1426.292 | 1896.846 | 1595.708 | 1458.046 | 1537.285  | -0.06048 | 0.74919  | 0.080666  | 0.675248 | -0.05313  | 0.92514  |    |
| AT4G36808 | AT4G36808 | 1.188904  | 0        | 0        | 0        | 0        | 0        | 0        | 0        | 0        | 0        | 0        | 0         | -0.2184  | NA       | -0.20558  | NA       | -0.19918  | NA       |    |
| AT4G36810 | GGPP51    | 788.2433  | 667.308  | 630.9506 | 654.9159 | 798.9355 | 644.956  | 766.5796 | 693.7262 | 1195.901 | 649.6056 | 709.068  | 716.8473  | 0.007538 | 0.979054 | 0.33814   | 0.135969 | -0.00864  | 0.988816 |    |
| AT4G36820 | AT4G36820 | 2.377808  | 5.352738 | 5.150617 | 6.186234 | 7.28714  | 3.987363 | 8.003731 | 3.23667  | 5.87476  | 6.716749 | 5.321336 | 5.179533  | 0.350745 | 0.605017 | 0.314675  | 0.671617 | 0.311102  | NA       |    |
| AT4G36830 | HOS3      | 8.322328  | 3.568492 | 9.01358  | 8.248311 | 6.624673 | 5.981045 | 2.66791  | 2.15778  | 3.904984 | 12.47396 | 3.991002 | 9.321359  | -0.0043  | 0.995841 | -0.87851  | 0.168131 | -0.327208 | NA       |    |
| AT4G36840 | AT4G36840 | 73.71204  | 101.702  | 96.57408 | 95.68041 | 86.78321 | 72.76938 | 81.81592 | 80.91675 | 84.9334  | 82.52006 | 95.78405 | 85.98024  | -0.05877 | 0.83476  | -0.11802  | 0.682442 | -0.03291  | 0.956776 |    |
| AT4G36850 | AT4G36850 | 76.08985  | 71.36984 | 74.68395 | 74.64722 | 62.27192 | 87.72199 | 31.12562 | 26.97225 | 24.46615 | 109.3871 | 81.15037 | 88.05205  | 0.004428 | 0.9897   | -1.34766  | 2.6E-07  | 0.321695  | 0.441256 |    |
| AT4G36860 | DAR1      | 294.8482  | 272.9896 | 267.8321 | 320.0343 | 266.3118 | 315.9989 | 297.0274 | 376.5326 | 259.6814 | 317.6063 | 308.6375 | 338.7414  | 0.15239  | 0.467778 | 0.15239   | 0.467778 | 0.20299   | 0.509829 |    |
| AT4G36870 | BLH2      | 395.905   | 376.4759 | 339.9407 | 213.6313 | 200.7276 | 224.892  | 252.5622 | 236.2769 | 204.0354 | 338.7161 | 395.1092 | 301.4488  | -0.78973 | 1.73E-07 | -0.67055  | 1.95E-05 | -0.10573  | 0.745579 |    |
| AT4G36880 | CP1       | 1.188904  | 1.784246 | 1.287654 | 4.536571 | 1.324935 | 2.990522 | 10.67164 | 7.55223  | 3.904984 | 5.75214  | 1.330334 | 5.179533  | 0.456288 | 0.528445 | 1.346289  | 0.036963 | 0.761328  | NA       |    |
| AT4G36890 | IRX14     | 267.5034  | 278.3424 | 275.558  | 200.0216 | 225.2389 | 195.3808 | 255.2031 | 243.8291 | 225.5128 | 258.1151 | 263.4061 | 264.1562  | -0.39629 | 0.005339 | -0.17633  | 0.291396 | -0.06219  | 0.850918 |    |
| AT4G36900 | RAP2-10   | 59.4452   | 58.88012 | 52.79383 | 66.8113  | 51.00998 | 52.83256 | 55.13682 | 47.47116 | 74.1947  | 42.21957 | 49.22236 | 60.08258  | 0.012923 | 0.971985 | 0.049186  | 0.899235 | -0.16596  | 0.779344 |    |
| AT4G36910 | CBSX1     | 99.86793  | 87.42806 | 92.71111 | 114.6515 | 145.0803 | 150.523  | 122.7239 | 128.3879 | 146.4369 | 128.5778 | 113.0784 | 129.4883  | 0.515639 | 0.011385 | 0.483857  | 0.02537  | 0.39202   | 0.223091 |    |
| AT4G36920 | AP2       | 177.1467  | 128.4657 | 150.6556 | 181.0504 | 168.9292 | 219.305  | 173.4142 | 155.3602 | 129.8407 | 150.6471 | 122.3907 | 152.2783  | 0.293839 | 0.170467 | -0.00206  | 0.994303 | -0.10336  | 0.819853 |    |
| AT4G36925 | AT4G36925 | 10.70014  | 10.70548 | 12.87654 | 2.886909 | 4.984204 | 2.42886  | 3.23667  | 6.928738 | 11.51443 | 6.5167   | 3.10772  | 0.10772   | -0.70184 | 0.258198 | -0.52141  | 0.447941 | -0.48894  | NA       |    |
| AT4G36930 | SPT       | 32.10041  | 39.25341 | 24.46543 | 53.20161 | 61.60946 | 52.83256 | 64.91915 | 51.78672 | 54.71278 | 34.54328 | 35.91902 | 32.1131   | 0.784095 | 0.005645 | 0.800516  | 0.008877 | 0.105599  | 0.88169  |    |
| AT4G36940 | NAPR11    | 243.7253  | 239.089  | 227.9148 | 197.9595 | 212.652  | 255.1912 | 272.1298 | 233.0402 | 221.6078 | 305.1323 | 227.4871 | 312.8438  | -0.10151 | 0.654542 | 0.033107  | 0.989075 | 0.250868  | 0.416253 |    |
| AT4G36945 | AT4G36945 | 66.57862  | 53.52738 | 73.3963  | 69.28582 | 84.79581 | 101.6778 | 85.37313 | 92.78453 | 77.12343 | 67.16749 | 67.84703 | 61.11849  | 0.351623 | 0.171264 | 0.368757  | 0.17797  | 0.002531  | 0.996974 |    |
| AT4G36950 | MAPPK21   | 1.188904  | 1.784246 | 2.575309 | 18.14629 | 20.53649 | 36.88311 | 17.78607 | 28.31113 | 4.797678 | 1.330334 | 5.179533 | 0.119533  | 2.571028 | 2.96E-07 | 2.464462  | 1.44E-06 | 0.450694  | NA       |    |
| AT4G36960 | AT4G36960 | 256.8033  | 321.1643 | 279.421  | 313.4358 | 290.8231 | 282.1059 | 256.1194 | 291.3003 | 287.0163 | 262.9128 | 223.4961 | 238.2585  | 0.05983  | 0.753067 | -0.03198  | 0.882251 | -0.22679  | 0.378088 |    |
| AT4G36970 | AT4G36970 | 161.6909  | 139.1712 | 180.2716 | 226.4162 | 262.337  | 267.1533 | 297.9167 | 302.0892 | 347.5436 | 158.3234 | 142.3457 | 179.2118  | 0.623839 | 0.000213 | 0.950273  | 7.18E-09 |           |          |    |

|           |           |          |          |          |           |          |          |          |          |          |          |          |           |          |          |           |          |          |          |
|-----------|-----------|----------|----------|----------|-----------|----------|----------|----------|----------|----------|----------|----------|-----------|----------|----------|-----------|----------|----------|----------|
| AT4G37445 | AT4G37445 | 8.322328 | 3.568492 | 7.725926 | 5.361402  | 5.962205 | 2.990522 | 4.446517 | 2.15778  | 7.809968 | 2.878607 | 5.321336 | 6.215439  | -0.3248  | 0.634793 | -0.33602  | 0.648399 | -0.35375 | NA       |
| AT4G37450 | AGP18     | 147.4241 | 96.34929 | 104.3    | 79.18379  | 110.632  | 71.77254 | 63.14055 | 72.28563 | 14.2208  | 141.0517 | 162.3007 | 94.26749  | -0.39318 | 0.215628 | -0.45952  | 0.164089 | 0.170425 | 0.781547 |
| AT4G37460 | SRRF1     | 865.5221 | 865.3593 | 806.0716 | 758.0198  | 713.4773 | 851.302  | 823.495  | 826.4297 | 499.8379 | 858.7844 | 854.0704 | 856.6947  | -0.12355 | 0.526765 | -0.23345  | 0.272565 | 0.018329 | 0.971556 |
| AT4G37470 | KAI2      | 1011.757 | 1206.15  | 1121.547 | 960.1035  | 1083.134 | 961.9514 | 1062.718 | 1043.287 | 1197.854 | 1127.454 | 1181.337 | 1013.117  | -0.14825 | 0.294439 | -0.01294  | 0.943691 | -0.00611 | 0.987439 |
| AT4G37480 | AT4G37480 | 136.724  | 137.3869 | 146.7926 | 125.7868  | 108.6446 | 126.5988 | 136.9527 | 153.2024 | 123.9537 | 193.8262 | 155.6491 | 156.4219  | -0.21852 | 0.286457 | -0.01928  | 0.943212 | 0.263775 | 0.401627 |
| AT4G37483 | AT4G37483 | 10.70014 | 28.54794 | 14.1642  | 21.44561  | 24.51129 | 22.92734 | 13.39955 | 12.94668 | 23.4299  | 12.47396 | 2.660668 | 25.89766  | -0.34785 | 0.531974 | -0.04879  | 0.943691 | -0.24438 | 0.819853 |
| AT4G37490 | CYCB1-1   | 5.68858  | 48.17464 | 59.2321  | 97.74249  | 92.08295 | 113.6398 | 81.81592 | 76.60119 | 66.38473 | 83.4796  | 75.82904 | 61.11849  | 0.852957 | 0.000197 | 0.441466  | 0.098491 | 0.413521 | 0.29501  |
| AT4G37500 | AT4G37500 | 1.189904 | 0        | 0        | 0.412416  | 0        | 1.324935 | 0.996841 | 0        | 1.07889  | 0        | 0        | 0         | 0.272876 | NA       | -0.05449  | NA       | -0.25776 | NA       |
| AT4G37510 | AT4G37510 | 1109.247 | 1213.287 | 1058.452 | 696.5699  | 740.6384 | 847.3147 | 892.8607 | 980.711  | 777.0918 | 995.0384 | 1112.159 | 1066.984  | -0.56074 | 2.01E-05 | -0.34584  | 0.014785 | -0.08923 | 0.751589 |
| AT4G37520 | PER50     | 229.4585 | 239.089  | 221.4765 | 276.2638  | 651.2053 | 800.4631 | 468.6629 | 479.0271 | 386.5934 | 162.1615 | 162.3007 | 170.9246  | 1.635209 | 1.01E-31 | 0.938112  | 1.65E-10 | -0.46596 | 0.03499  |
| AT4G37530 | PER51     | 117.7015 | 99.91778 | 132.6284 | 329.1076  | 306.7223 | 347.8974 | 186.7537 | 199.5946 | 174.748  | 121.861  | 127.7121 | 72.51346  | 1.440589 | 6.41E-14 | 0.648936  | 0.002474 | -0.133   | 0.774629 |
| AT4G37540 | LBD39     | 143.8574 | 173.0719 | 176.4086 | 315.4979  | 340.5082 | 302.0428 | 258.7873 | 244.908  | 358.2823 | 196.7048 | 341.8958 | 200.9659  | 0.924936 | 5.21E-05 | 0.776903  | 0.001093 | 0.555986 | 0.102785 |
| AT4G37550 | AT4G37550 | 369.7491 | 387.1814 | 378.5704 | 285.3916  | 196.0903 | 252.2007 | 161.8532 | 204.9891 | 117.1495 | 379.0166 | 355.1992 | 426.7935  | -0.60929 | 0.002894 | -1.19568  | 2.09E-09 | 0.03336  | 0.951328 |
| AT4G37553 | AT4G37553 | 3.566712 | 3.568492 | 5.150617 | 1.649662  | 1.987402 | 4.984204 | 3.557214 | 2.15778  | 0        | 6.716749 | 1.330334 | 8.28752   | -0.37621 | 0.612235 | -0.59484  | 0.425467 | 0.306442 | 0.000000 |
| AT4G37560 | AT4G37560 | 360.2379 | 392.5341 | 365.6938 | 488.7125  | 484.926  | 379.7963 | 466.8843 | 466.0805 | 429.5482 | 317.6063 | 369.8328 | 309.7361  | 0.280214 | 0.073202 | 0.283189  | 0.084016 | -0.16428 | 0.560065 |
| AT4G37570 | AT4G37570 | 0        | 0        | 0        | 0         | 0        | 0        | 0        | 0        | 0        | 0        | 0        | 0         | #N/A     | #N/A     | #N/A      | #N/A     | #N/A     | #N/A     |
| AT4G37580 | HL51      | 26.15589 | 28.54794 | 24.46543 | 33.40566  | 21.86142 | 29.90522 | 21.34328 | 28.05114 | 18.54867 | 16.31211 | 13.30334 | 21.75404  | 0.118384 | 0.791476 | -0.19928  | 0.672798 | -0.53943 | 0.395948 |
| AT4G37590 | NPY5      | 550.4625 | 453.1985 | 488.021  | 352.2029  | 385.556  | 373.8153 | 456.2127 | 395.9526 | 354.3773 | 474.0106 | 428.3675 | 526.2405  | -0.42343 | 0.005056 | -0.30397  | 0.063425 | -0.06286 | 0.857184 |
| AT4G37600 | AT4G37600 | 11.88904 | 8.92123  | 12.87654 | 29.69392  | 44.38531 | 31.8989  | 34.68284 | 18.34113 | 41.00233 | 16.31211 | 19.95501 | 19.68222  | 1.418293 | 0.000311 | 1.264873  | 0.002245 | 0.574436 | 0.431857 |
| AT4G37610 | BTS       | 101.0568 | 103.4863 | 144.2173 | 224.7665  | 264.9869 | 544.2751 | 739.9005 | 600.9417 | 564.2702 | 165.0401 | 148.9974 | 159.5296  | 1.462883 | 1.31E-07 | 2.307983  | 8.97E-18 | 0.408086 | 0.417424 |
| AT4G37620 | AT4G37620 | 0        | 3.568492 | 3.829623 | 1.649662  | 4.637271 | 1.993682 | 0.889303 | 2.15778  | 2.928738 | 1.919071 | 1.330334 | 0         | 0.142905 | 0.862807 | -0.12117  | 0.890257 | -0.2352  | NA       |
| AT4G37630 | CYCD5-1   | 86.78999 | 53.52738 | 73.963   | 68.46099  | 74.8588  | 70.7757  | 112.9415 | 72.28563 | 84.9334  | 68.12703 | 50.55269 | 63.1903   | -0.01932 | 0.956019 | 0.31117   | 0.290283 | -0.43198 | 0.644822 |
| AT4G37640 | ACA2      | 489.8284 | 397.8869 | 325.7765 | 630.5834  | 647.2305 | 705.7633 | 593.1654 | 634.3873 | 546.6978 | 272.5081 | 243.4511 | 285.9102  | 0.693456 | 1.01E-05 | 0.536173  | 0.001129 | -0.5854  | 0.004991 |
| AT4G37650 | SHR       | 143.8574 | 101.702  | 123.6148 | 81.65828  | 81.48347 | 77.75358 | 60.47264 | 78.75897 | 80.05217 | 94.99043 | 95.78405 | 87.01615  | -0.60858 | 0.003119 | -0.74735  | 0.000497 | -0.41323 | 0.204964 |
| AT4G37660 | AT4G37660 | 40.42273 | 28.54794 | 45.0679  | 59.38784  | 52.33491 | 41.86731 | 33.79353 | 32.3667  | 67.36097 | 45.09817 | 43.90102 | 43.50807  | 0.396887 | 0.264667 | 0.192367  | 0.651463 | 0.181823 | 0.798327 |
| AT4G37670 | NAG52     | 53.50068 | 73.15409 | 61.80741 | 46.19054  | 41.07297 | 50.83888 | 88.93035 | 93.86342 | 91.76712 | 42.21957 | 41.24035 | 51.79533  | -0.42378 | 0.098436 | 0.543154  | 0.029779 | -0.43603 | 0.285872 |
| AT4G37680 | HPH4      | 505.2842 | 572.743  | 533.0889 | 396.3314  | 394.8305 | 403.7205 | 382.4005 | 347.4026 | 250.8952 | 530.6232 | 433.6889 | 462.0143  | -0.4217  | 0.0124   | -0.69998  | 2.25E-05 | -0.16834 | 0.589651 |
| AT4G37682 | AT4G37682 | 11.88904 | 21.41095 | 18.02716 | 4.536571  | 1.987402 | 6.977885 | 6.225124 | 10.7889  | 3.904984 | 18.23118 | 10.64267 | 21.75404  | -1.5659  | 0.00133  | -1.04346  | 0.048291 | 0.032057 | NA       |
| AT4G37685 | AT4G37685 | 11.88904 | 19.62671 | 23.17778 | 7.42348   | 7.28714  | 9.968408 | 12.45025 | 8.63112  | 10.73871 | 16.31211 | 13.30334 | 18.64632  | -1.00516 | 0.023029 | -0.65     | 0.190136 | -0.13074 | NA       |
| AT4G37690 | GT6       | 5.94452  | 5.352738 | 14.1642  | 18.248311 | 9.274542 | 5.981045 | 4.446517 | 3.23667  | 5.857476 | 2.878607 | 6.65167  | 6.215439  | -0.07071 | 0.922398 | -0.68005  | 0.282735 | -0.55044 | NA       |
| AT4G37700 | AT4G37700 | 0        | 1.784246 | 2.575309 | 0.412416  | 0.662467 | 0.996841 | 2.66791  | 2.15778  | 0        | 0        | 0        | 0.1035907 | -0.3531  | 0.61598  | 0.108108  | 0.895119 | -0.47686 | NA       |
| AT4G37705 | AT4G37705 | 1.188904 | 1.784246 | 0        | 0         | 0        | 0        | 0.889303 | 0        | 0        | 0        | 1.330334 | 1.035907  | -0.58251 | NA       | -0.31162  | NA       | -0.06706 | NA       |
| AT4G37710 | VQ29      | 1.188904 | 0        | 0        | 0.824831  | 0.662467 | 0        | 0.889303 | 1.07889  | 1.952492 | 0        | 0        | 0         | 0.055782 | NA       | 0.438903  | NA       | -0.27556 | NA       |
| AT4G37720 | PSK4      | 0        | 0        | 0        | 0         | 0        | 0        | 0        | 0        | 0        | 0        | 0        | 0         | #N/A     | #N/A     | #N/A      | #N/A     | #N/A     | #N/A     |
| AT4G37730 | AtbZIP7   | 20.21137 | 14.27397 | 18.02716 | 13.1973   | 13.24935 | 11.96209 | 16.00746 | 16.18335 | 15.61994 | 7.676285 | 5.321336 | 11.39497  | -0.40213 | 0.387723 | -0.13129  | 0.818794 | -0.92728 | 0.000000 |
| AT4G37740 | GRF2      | 115.3237 | 108.839  | 87.5605  | 72.99756  | 92.74542 | 89.71567 | 91.59826 | 96.0212  | 69.31427 | 96.9131  | 98.44471 | 95.304    | -0.28884 | 0.224832 | -0.26926  | 0.298894 | -0.09666 | 0.850053 |
| AT4G37750 | ANT       | 268.6923 | 248.0102 | 256.2432 | 265.1832  | 276.2489 | 261.1723 | 255.2301 | 241.6713 | 295.2342 | 312.8086 | 272.7185 | 272.4434  | 0.051578 | 0.794362 | -0.15879  | 0.400107 | 0.148125 | 0.612836 |
| AT4G37760 | SEQE      | 806.0769 | 744.0306 | 749.4148 | 412.4156  | 403.4426 | 394.7489 | 412.6368 | 385.1637 | 360.2348 | 771.4666 | 792.879  | 761.3913  | -0.91772 | 5.58E-19 | -0.98187  | 1.79E-20 | 0.01416  | 0.962331 |
| AT4G37770 | ACS8      | 20.21137 | 26.76369 | 27.04074 | 7.335896  | 4.637271 | 7.974726 | 19.56468 | 11.86779 | 5.795562 | 14.39303 | 17.29434 | 12.43088  | -0.17725 | 0.000282 | -0.837    | 0.077759 | -0.65151 | NA       |
| AT4G37780 | MYB87     | 0        | 1.784246 | 2.575309 | 2.886909  | 5.299738 | 1.993682 | 1.778607 | 1.07889  | 0.972646 | 5.757214 | 2.660668 | 3.10772   | 0.656669 | 0.348407 | -0.08963  | 0.91994  | 0.746928 | 0.000000 |
| AT4G37790 | HAT22     | 278.2035 | 306.8903 | 301.1111 | 410.7659  | 379.5937 | 460.5404 | 311.2562 | 345.2448 | 326.0662 | 276.3463 | 279.3701 | 228.9353  | 0.489374 | 0.000721 | -0.147934 | 0.413528 | -0.1725  | 0.535067 |
| AT4G37800 | XTH7      | 936.8563 | 1036.647 | 1121.547 | 564.1845  | 516.7245 | 540.2877 | 321.9279 | 311.7992 | 386.5934 | 1600.505 | 1444.743 | 1535.213  | -0.9212  | 1.79E-14 | -1.58068  | 2.8E-38  | 0.561404 | 9.32E-05 |
| AT4G37810 | EPFL2     | 26.15589 | 17.84246 | 30.9037  | 49.07745  | 58.95959 | 43.86099 | 25.7988  | 20.49891 | 30.26363 | 53.734   | 53.21336 | 24.86176  | 0.919183 | 0.008173 | 0.003535  | 0.994535 | 0.71286  | 0.183676 |
| AT4G37820 | AT4G37820 | 463.6725 | 419.2978 | 351.5296 | 348.4912  | 411.3922 | 318.989  | 265.9017 | 267.5647 | 530.1016 | 269.6295 | 339.2352 | 342.8851  | -0.1851  | 0.537083 | -0.2057   | 0.510352 | -0.3602  | 0.402181 |
| AT4G37830 | COX6A     | 632.4969 | 767.2258 | 779.0309 | 1296.635  | 1243.451 | 930.0524 | 674.092  | 686.174  | 1262.286 | 949.9403 | 1169.364 | 798.6839  | 0.645922 | 0.009545 | 0.256997  | 0.38348  | 0.403959 | 0.309787 |
| AT4G37840 | HKL3      | 0        | 0        | 0        | 0.824831  | 0        | 0        | 1.778607 | 2.15778  | 0        | 0        | 0        | 0         | 0.141132 | NA       | 0.58474   | NA       | 0.000000 | 0.000000 |
| AT4G37850 | BHLH25    | 0        | 1.784246 | 0        | 0         | 0        | 0        | 0.889303 | 0        | 0        | 0        | 0        | 0         | -0.26522 | NA       | -0.08117  | NA       | -0.24296 | NA       |
| AT4G37860 | AT4G37860 | 1.188904 | 0        | 0        | 0         | 0        | 0        | 1.778607 | 0        | 0        | 2.878607 | 0        | 0         | -0.23421 | NA       | 0.076266  | NA       | 0.219011 | NA       |
| AT4G37870 | PCKA      | 2273.184 | 2460.475 | 2468.433 | 2201.062  | 2162.293 | 2616.707 | 2471.127 | 2675.647 | 2690.534 | 2891.081 | 2908.11  | 2466.493  | -0.04563 | 0.777284 | 0.111019  | 0.467509 | 0.196844 | 0.332495 |
| AT4G37880 | AT4G37880 | 450.5946 | 463.904  | 466.7662 | 392.2072  | 428.6163 | 447.5815 | 460.6592 | 429.3982 | 602.3438 | 410.6812 | 419.0552 | 457.8707  | -0.12592 | 0.489075 | 0.108875  | 0.578244 | -0.10104 | 0.757199 |
| AT4G37890 | EDA40     | 16.64466 | 14.27397 | 14.1642  | 5.361402  | 5.962205 | 0        | 4.446517 | 4.31556  | 5.857476 | 6.838217 | 11.97301 | 11.35947  | -1.46942 | 0.003635 | -1.28026  | 0.017752 | -0.42014 | NA       |



|           |           |           |           |          |          |          |          |          |          |          |          |          |          |          |          |          |          |          |          |
|-----------|-----------|-----------|-----------|----------|----------|----------|----------|----------|----------|----------|----------|----------|----------|----------|----------|----------|----------|----------|----------|
| AT4G38400 | EXLA2     | 87.97889  | 80.29107  | 83.69753 | 36.29257 | 34.4483  | 20.93366 | 29.34701 | 21.5778  | 39.04984 | 71.96517 | 59.86503 | 63.1903  | -1.34872 | 1.81E-07 | -1.40157 | 2.84E-07 | -0.35054 | 0.446263 |
| AT4G38401 | AT4G38401 | 0         | 0         | 0        | 0        | 0        | 0        | 0        | 0        | 0        | 0        | 0        | 0        | 0        | NA       | 0        | NA       | 0.256851 | NA       |
| AT4G38405 | AT4G38405 | 0         | 0         | 0        | 0        | 0        | 0        | 0        | 0        | 0        | 0        | 0        | 0        | #N/A     | #N/A     | #N/A     | #N/A     | #N/A     | #N/A     |
| AT4G38410 | AT4G38410 | 1.188904  | 0         | 3.862963 | 2.062078 | 1.987402 | 2.990522 | 2.66791  | 1.07889  | 3.904984 | 2.878607 | 0        | 2.071813 | 0.169943 | 0.835534 | 0.256086 | 0.760432 | -0.02315 | NA       |
| AT4G38420 | skPS      | 98.67903  | 126.6815  | 117.1765 | 76.7093  | 48.36011 | 72.76938 | 87.15174 | 94.94231 | 57.59851 | 88.27728 | 111.7481 | 109.8061 | -0.74865 | 0.003122 | -0.48723 | 0.08059  | -0.13542 | 0.805717 |
| AT4G38430 | R0PGEF1   | 760.8985  | 765.4415  | 753.2778 | 595.5281 | 529.3114 | 520.3509 | 562.9291 | 653.8073 | 625.7737 | 751.3164 | 783.5667 | 633.9784 | -0.46162 | 0.000336 | -0.30448 | 0.029071 | -0.07217 | 0.798327 |
| AT4G38440 | AT4G38440 | 152.1797  | 148.0924  | 136.4914 | 101.0418 | 96.05775 | 111.6462 | 128.949  | 163.9913 | 135.6982 | 116.1038 | 111.7481 | 112.2128 | -0.49667 | 0.006731 | -0.02964 | 0.909112 | -0.34801 | 0.235234 |
| AT4G38460 | GRR       | 404.2273  | 488.8834  | 372.1321 | 515.5195 | 447.8279 | 425.651  | 377.0647 | 455.2916 | 646.2748 | 405.8836 | 327.2622 | 323.9038 | 0.136382 | 0.587929 | 0.2213   | 0.305572 | -0.24769 | 0.513629 |
| AT4G38470 | AT4G38470 | 498.1508  | 421.0821  | 426.2136 | 312.1986 | 283.536  | 330.9511 | 274.7948 | 428.3193 | 313.375  | 378.057  | 331.2532 | 366.7109 | -0.53048 | 0.002971 | -0.40122 | 0.03599  | -0.31591 | 0.269349 |
| AT4G38480 | AT4G38480 | 41.61164  | 24.97944  | 34.76667 | 40.41673 | 41.73544 | 45.85468 | 54.24751 | 46.39227 | 42.95482 | 34.54328 | 35.91902 | 32.1131  | 0.278671 | 0.395153 | 0.449072 | 0.170754 | -0.01675 | 0.985388 |
| AT4G38490 | AT4G38490 | 114.1348  | 133.8185  | 101.7247 | 111.7646 | 157.6672 | 124.6051 | 104.9378 | 64.7334  | 197.2017 | 151.6066 | 109.0874 | 133.6319 | 0.163279 | 0.676303 | 0.070259 | 0.875974 | 0.16852  | 0.806367 |
| AT4G38495 | AT4G38495 | 46.36725  | 51.74313  | 60.51975 | 114.6515 | 102.02   | 74.76306 | 88.93035 | 61.49673 | 120.0783 | 100.7512 | 129.0424 | 55.93895 | 0.819858 | 0.012277 | 0.711518 | 0.040602 | 0.775388 | 0.904851 |
| AT4G38500 | AT4G38500 | 231.8363  | 262.2842  | 225.3395 | 237.5514 | 200.7276 | 232.2639 | 243.6692 | 213.6202 | 221.6078 | 200.5429 | 224.8264 | 216.5045 | -0.0928  | 0.169508 | -0.07425 | 0.722083 | -0.15871 | 0.592014 |
| AT4G38510 | VHA-B2    | 897.6225  | 824.3217  | 727.5247 | 606.2509 | 510.7623 | 693.8012 | 565.597  | 730.4085 | 479.3368 | 729.2471 | 722.3713 | 697.1651 | -0.42882 | 0.018889 | -0.45582 | 0.014893 | -0.18511 | 0.575858 |
| AT4G38520 | AT4G38520 | 659.8417  | 513.8629  | 591.0333 | 563.3597 | 547.198  | 542.2814 | 490.8955 | 561.0228 | 534.9828 | 593.9526 | 520.1606 | 510.7019 | -0.09769 | 0.541997 | -0.15774 | 0.324848 | -0.12146 | 0.642093 |
| AT4G38530 | PLC3      | 17.83356  | 10.70548  | 18.02716 | 5.361402 | 5.299738 | 3.987363 | 6.225124 | 8.63112  | 12.6911  | 14.39303 | 18.62468 | 16.5745  | -1.37749 | 0.002947 | -0.66876 | 0.200026 | 0.054639 | NA       |
| AT4G38540 | AT4G38540 | 19.02246  | 12.48972  | 14.1642  | 95.68041 | 96.05775 | 59.81045 | 144.9565 | 127.309  | 214.7741 | 10.55489 | 9.312338 | 13.46678 | 2.22005  | 1.37E-11 | 3.115452 | 2.61E-22 | -0.39845 | 0.598084 |
| AT4G38545 | AT4G38545 | 19.02246  | 10.70548  | 10.30123 | 14.43455 | 13.24935 | 5.981045 | 8.003731 | 11.86779 | 14.64369 | 15.35257 | 13.30334 | 12.43088 | -0.18116 | 0.754178 | -0.20639 | 0.740265 | 0.015139 | NA       |
| AT4G38550 | AT4G38550 | 112.9459  | 98.13353  | 97.86173 | 218.5803 | 231.2011 | 172.4535 | 157.4067 | 140.2557 | 255.7765 | 27.7746  | 63.85603 | 55.93895 | 0.973227 | 4.89E-05 | 0.804917 | 0.00134  | -0.80432 | 0.019897 |
| AT4G38552 | AT4G38552 | 8.322328  | 12.48972  | 5.150617 | 8.660727 | 5.299738 | 8.971567 | 11.56095 | 8.63112  | 13.66654 | 12.47396 | 7.982004 | 9.323159 | -0.12176 | 0.851144 | 0.354233 | 0.567512 | 0.20752  | NA       |
| AT4G38560 | AT4G38560 | 26.15589  | 46.3904   | 28.3284  | 169.5028 | 178.8662 | 147.5324 | 123.6132 | 134.8612 | 174.748  | 12.47936 | 11.97301 | 24.86176 | 2.22837  | 5.44E-18 | 2.031975 | 9.85E-15 | -0.86713 | 0.060909 |
| AT4G38570 | PI52      | 131.6833  | 119.5445  | 164.8189 | 138.5716 | 151.705  | 127.5956 | 120.9453 | 113.2834 | 90.79088 | 140.0922 | 146.3367 | 133.6319 | 0.001797 | 0.994993 | -0.3548  | 0.106514 | 0.002819 | 0.969189 |
| AT4G38580 | HIPP26    | 110.5681  | 83.85956  | 108.163  | 235.0769 | 183.5034 | 187.4061 | 113.8308 | 126.2301 | 187.4392 | 88.27728 | 81.15037 | 102.5547 | 0.962447 | 2.06E-05 | 0.467799 | 0.070181 | -0.15491 | 0.764564 |
| AT4G38590 | BGAL14    | 2.377808  | 0         | 1.287654 | 0        | 0.662467 | 0.996841 | 1.778807 | 0        | 0        | 3.838143 | 2.660668 | 2.071813 | -0.46617 | 0.506986 | -0.32535 | 0.669828 | 0.543444 | NA       |
| AT4G38600 | UPL3      | 1319.683  | 1031.294  | 807.3593 | 587.6922 | 469.0268 | 778.5326 | 736.3433 | 999.0521 | 528.1491 | 723.4899 | 726.3623 | 787.289  | -0.7527  | 0.002575 | -0.46143 | 0.091716 | -0.47699 | 0.21576  |
| AT4G38620 | MYB4      | 120.0793  | 142.7397  | 101.7247 | 170.74   | 184.8284 | 160.9414 | 161.8532 | 116.5201 | 183.5342 | 139.1327 | 228.8174 | 121.2011 | 0.487409 | 0.069471 | 0.334584 | 0.262412 | 0.402298 | 0.34135  |
| AT4G38630 | RPN10     | 878.6     | 915.3182  | 775.1769 | 109.5    | 1032.124 | 1110.481 | 974.6766 | 1084.284 | 1205.664 | 948.9807 | 921.9214 | 810.0789 | 0.333322 | 0.012217 | 0.342969 | 0.012099 | 0.062122 | 0.836577 |
| AT4G38640 | AT4G38640 | 470.806   | 456.767   | 427.5012 | 298.1765 | 330.5712 | 341.9164 | 347.7177 | 390.5582 | 310.4462 | 332.9589 | 407.0822 | 314.9156 | -0.47828 | 0.001563 | -0.36511 | 0.021454 | -0.36019 | 0.103841 |
| AT4G38650 | AT4G38650 | 27.34479  | 26.76369  | 39.91728 | 19.38353 | 19.21155 | 22.92734 | 36.64414 | 26.65669 | 32.35864 | 32.62421 | 46.56169 | 24.86176 | -0.58389 | 0.11399  | -0.12416 | 0.79599  | 0.110826 | 0.893056 |
| AT4G38660 | AT4G38660 | 242.5364  | 158.7979  | 163.5321 | 128.2612 | 92.08295 | 113.6298 | 63.14055 | 100.3368 | 119.102  | 61.82511 | 118.3997 | 133.6319 | -0.71826 | 0.013352 | -0.94955 | 0.001144 | -0.25289 | 0.644822 |
| AT4G38670 | AT4G38670 | 60.6341   | 82.07532  | 60.51975 | 64.33683 | 41.73544 | 42.86415 | 39.12935 | 37.76115 | 41.97858 | 69.08657 | 101.1054 | 60.08258 | -0.38666 | 0.212396 | -0.71231 | 0.002184 | 0.174027 | 0.77103  |
| AT4G38680 | CS2       | 876.2222  | 756.5203  | 647.6901 | 508.9208 | 440.5407 | 408.7047 | 265.0124 | 373.2959 | 682.396  | 595.8716 | 538.7853 | 496.1992 | -0.7103  | 0.008748 | -0.75034 | 0.006366 | -0.46037 | 0.280975 |
| AT4G38690 | AT4G38690 | 445.839   | 504.9416  | 455.8296 | 254.604  | 219.2767 | 285.0965 | 259.6766 | 270.8014 | 332.8999 | 579.5595 | 522.8213 | 566.6409 | -0.8785  | 2.03E-09 | -0.69015 | 5.62E-06 | 0.24783  | 0.316554 |
| AT4G38700 | DIR15     | 34.47821  | 33.90067  | 21.89012 | 31.34358 | 21.86142 | 23.92418 | 12.94668 | 15.84867 | 44.13864 | 33.25835 | 27.96948 | -0.18032 | 0.675957 | -0.63421 | 0.119876 | 0.202321 | 0.764545 | NA       |
| AT4G38710 | AT4G38710 | 536.1957  | 396.1026  | 364.4062 | 344.7794 | 375.6189 | 356.869  | 248.1157 | 339.8503 | 575.0089 | 351.19   | 311.2981 | 400.8958 | -0.25711 | 0.388131 | -0.15192 | 0.652739 | -0.27355 | 0.568841 |
| AT4G38730 | AT4G38730 | 135.535   | 114.1917  | 131.3407 | 89.08176 | 88.77061 | 84.06683 | 118.2774 | 81.99564 | 75.17094 | 146.809  | 110.4177 | 107.7343 | -0.43146 | 0.067652 | -0.45208 | 0.070148 | -0.06047 | 0.914481 |
| AT4G38740 | CYP18-3   | 1288.772  | 1186.524  | 1229.71  | 1075.167 | 1143.419 | 899.1505 | 100.4602 | 558.865  | 98.1059  | 1320.321 | 1432.77  | 1168.503 | -0.24039 | 0.333451 | -0.82392 | 0.000169 | -0.07877 | 0.797934 |
| AT4G38760 | AT4G38760 | 712.6647  | 669.0923  | 659.279  | 280.4426 | 272.9365 | 397.7395 | 450.8769 | 480.106  | 245.0377 | 538.2995 | 553.4189 | 586.3231 | -1.07428 | 1.14E-06 | -0.77417 | 0.000794 | -0.27909 | 0.493234 |
| AT4G38770 | PRP4      | 4284.81   | 2926.163  | 2455.57  | 172.2417 | 677.0416 | 794.4821 | 963.1157 | 1200.265 | 1194.925 | 2273.214 | 2532.956 | 2011.311 | -2.09084 | 4.18E-30 | -1.48594 | 1.34E-15 | -0.48744 | 0.080487 |
| AT4G38780 | AT4G38780 | 14.26685  | 14.27397  | 19.31482 | 9.897974 | 6.24673  | 16.94629 | 11.56095 | 12.94668 | 8.57476  | 21.10978 | 21.28534 | 13.46678 | -0.49244 | 0.324501 | -0.55716 | 0.297805 | 0.188507 | NA       |
| AT4G38781 | AT4G38781 | 0         | 0         | 0        | 0        | 0        | 0        | 0        | 0        | 0        | 0        | 0        | 0        | #N/A     | #N/A     | #N/A     | #N/A     | #N/A     | #N/A     |
| AT4G38790 | AT4G38790 | 180.7134  | 214.1095  | 168.6827 | 348.4912 | 327.2588 | 348.8943 | 276.5734 | 262.1703 | 250.8952 | 151.6066 | 129.0424 | 155.386  | 0.861023 | 2.52E-09 | 0.490121 | 0.002052 | -0.34594 | 0.165196 |
| AT4G38800 | MTN1      | 1142.537  | 1191.876  | 1314.695 | 1155.176 | 1210.328 | 1096.525 | 930.2114 | 1009.841 | 1144.16  | 1268.506 | 1227.898 | 1051.188 | -0.07446 | 0.657544 | -0.24009 | 0.111597 | -0.05515 | 0.861847 |
| AT4G38810 | AT4G38810 | 486.2617  | 538.8423  | 498.3222 | 463.1427 | 396.8179 | 466.5215 | 495.342  | 503.8416 | 479.3368 | 531.5827 | 619.9356 | 551.1023 | -0.19513 | 0.162249 | -0.03982 | 0.826421 | 0.159008 | 0.913936 |
| AT4G38820 | AT4G38820 | 0         | 0         | 0        | 0        | 0        | 0        | 0        | 0        | 0        | 0        | 0        | 0        | #N/A     | #N/A     | #N/A     | #N/A     | #N/A     | #N/A     |
| AT4G38825 | AT4G38825 | 0         | 0         | 0        | 0        | 0        | 0        | 0        | 0        | 0        | 0        | 0        | 0        | #N/A     | #N/A     | #N/A     | #N/A     | #N/A     | #N/A     |
| AT4G38830 | CRK26     | 2.377808  | 1.784246  | 3.862963 | 4.948987 | 6.24673  | 5.981045 | 0.889303 | 2.15778  | 0.976246 | 1.919071 | 0        | 2.071813 | 0.788368 | 0.239161 | -0.51891 | 0.497559 | -0.45969 | NA       |
| AT4G38840 | AT4G38840 | 640.8192  | 545.9793  | 618.0741 | 598.8274 | 744.6132 | 377.8027 | 353.0535 | 210.3835 | 454.9306 | 725.4089 | 1042.982 | 626.7235 | -0.0634  | 0.86786  | -0.7783  | 0.008544 | -0.38426 | 0.433392 |
| AT4G38850 | SAUR15    | 71.33424  | 58.88012  | 56.65679 | 84.95761 | 83.47088 | 63.79781 | 43.57587 | 28.05114 | 66.38473 | 62.36982 | 74.4987  | 108.7702 | 0.299528 | 0.387726 | -0.40669 | 0.263933 | 0.366104 | 0.505619 |
| AT4G38860 | AT4G38860 | 743.065   | 836.8114  | 691.4704 | 744.8220 | 779.724  | 521.3477 | 311.2562 | 288.0636 | 459.8149 | 60.57713 | 435.0192 | 609.113  | -1.06299 | 5.905399 | -1.06299 | 6.24E-07 | -0.57277 | 0.057967 |
| AT4G38870 | AT4G38870 | 475.56616 | 71.136984 | 1.287654 | 5.       |          |          |          |          |          |          |          |          |          |          |          |          |          |          |

|           |           |          |          |          |            |          |          |          |          |          |          |          |          |          |          |          |           |          |          |
|-----------|-----------|----------|----------|----------|------------|----------|----------|----------|----------|----------|----------|----------|----------|----------|----------|----------|-----------|----------|----------|
| AT4G39364 | AT4G39364 | 20.21137 | 35.68492 | 28.3284  | 31.34358   | 35.11077 | 33.89259 | 32.01493 | 29.13003 | 29.28738 | 22.06932 | 29.26735 | 23.82585 | 0.262203 | 0.480582 | 0.127504 | 0.776191  | -0.13465 | 0.864774 |
| AT4G39366 | AT4G39366 | 19.02246 | 28.54794 | 19.31482 | 27.21943   | 32.4609  | 23.92418 | 26.6791  | 15.10446 | 24.40615 | 17.27164 | 21.85334 | 23.82585 | 0.331784 | 0.418782 | 0.022846 | 0.965713  | -0.06946 | 0.944286 |
| AT4G39370 | UBP27     | 77.27876 | 75.9786  | 88.84815 | 133.6226   | 151.0425 | 134.5735 | 118.2774 | 130.5457 | 122.0037 | 94.99002 | 81.15037 | 99.44703 | 0.507845 | 0.003811 | 0.403502 | 0.0699757 | -0.00488 | 0.993182 |
| AT4G39380 | AT4G39380 | 58.25629 | 35.68492 | 23.17778 | 63.512     | 65.58426 | 57.81677 | 61.36194 | 32.3667  | 31.23987 | 58.53167 | 79.82004 | 40.40035 | 0.607101 | 0.105992 | 0.078795 | 0.878868  | 0.533746 | 0.371475 |
| AT4G39390 | NST-K1    | 161.6909 | 180.2088 | 162.2444 | 355.0898   | 412.7171 | 463.531  | 348.607  | 342.0081 | 312.3987 | 131.4564 | 139.6851 | 134.6678 | 1.265036 | 1.05E-11 | 0.798799 | 5.63E-10  | -0.30317 | 0.288799 |
| AT4G39400 | BR11      | 1819.023 | 1477.356 | 1164.04  | 951.8003   | 899.6306 | 1336.763 | 1106.474 | 1235.329 | 843.4765 | 933.6282 | 1021.696 | 101.1075 | -0.47238 | 0.028391 | -0.51239 | 0.019829  | -0.57181 | 0.042555 |
| AT4G39403 | PLS       | 2.377808 | 0        | 1.287654 | 0.124156   | 0.312336 | 1.993682 | 1.778607 | 1.07889  | 3.904984 | 1.919071 | 2.666668 | 0.143626 | 0.62991  | 0.371087 | 0.304999 | 0.71045   | 0.502828 | NA       |
| AT4G39404 | AT4G39404 | 0        | 0        | 0        | 0.824831   | 0        | 0.996841 | 0        | 2.15778  | 0        | 0        | 1.330334 | 2.071813 | 0.274293 | NA       | 0.316347 | NA        | 0.495644 | NA       |
| AT4G39410 | WRKY13    | 27.34479 | 8.92123  | 21.89012 | 24.74493   | 25.17376 | 24.92102 | 24.9005  | 18.34113 | 9.76246  | 29.7456  | 27.93701 | 17.61041 | 0.279187 | 0.557237 | -0.15642 | 0.782174  | 0.281681 | 0.736333 |
| AT4G39420 | AT4G39420 | 691.9421 | 387.1814 | 320.6259 | 160.4297   | 164.2919 | 226.2829 | 237.444  | 307.4836 | 199.1542 | 302.2537 | 315.2892 | 323.2028 | -1.28957 | 4.23E-07 | -0.87253 | 0.001121  | -0.54955 | 0.167523 |
| AT4G39460 | SAMC1     | 518.3621 | 520.9998 | 600.0469 | 446.2337   | 449.8153 | 416.6794 | 378.8433 | 417.5304 | 369.9972 | 555.5711 | 437.6799 | 580.1077 | -0.31545 | 0.034889 | -0.48627 | 0.001016  | -0.05572 | 0.86931  |
| AT4G39470 | AT4G39470 | 115.3237 | 92.78079 | 97.86173 | 70.11065   | 71.54647 | 79.74726 | 83.59453 | 76.60119 | 80.05217 | 100.7512 | 97.11438 | 122.237  | -0.47326 | 0.024798 | -0.34577 | 0.14203   | 0.05863  | 0.907091 |
| AT4G39480 | CYP96A9   | 29.7226  | 19.62671 | 19.31482 | 5.773818   | 5.299738 | 2.990522 | 5.335821 | 6.47334  | 0.976246 | 20.15025 | 13.30334 | 19.68222 | -1.86949 | 3.02E-05 | -1.96819 | 3.79E-05  | -0.3191  | NA       |
| AT4G39490 | CYP96A10  | 1.188904 | 0        | 0        | 0          | 0        | 0        | 0        | 0        | 0        | 0        | 0        | 0        | -0.2184  | NA       | -0.20558 | NA        | -0.19918 | NA       |
| AT4G39490 | CYP96A11  | 0        | 0        | 0        | 1.237247   | 0        | 0        | 1.778607 | 1.07889  | 0        | 0.959536 | 0        | 0        | 0.216234 | NA       | 0.430369 | NA        | 0.150186 | NA       |
| AT4G39510 | CYP96A12  | 250.8587 | 228.3835 | 200.8741 | 114.2391   | 113.9444 | 108.6556 | 75.5908  | 63.65451 | 80.05217 | 206.3002 | 186.2468 | 212.3608 | -0.99191 | 6.83E-10 | -1.59136 | 2.66E-20  | -0.16307 | 0.606351 |
| AT4G39520 | DRG3      | 620.6079 | 678.0135 | 575.5815 | 639.2441   | 592.9082 | 626.016  | 631.4055 | 604.1784 | 608.2013 | 509.5134 | 529.4729 | 508.6301 | -0.00762 | 0.961435 | -0.01893 | 0.907417  | -0.27083 | 0.103313 |
| AT4G39530 | PCMP-E53  | 19.02246 | 19.62671 | 16.73951 | 16.49662   | 18.54908 | 19.93682 | 28.45771 | 28.05114 | 15.61994 | 18.23118 | 21.28534 | 30.04129 | -0.02642 | 0.960598 | 0.345224 | 0.463724  | 0.297523 | 0.701627 |
| AT4G39540 | SK2       | 301.9816 | 390.7499 | 363.1185 | 332.8194   | 327.2588 | 329.9543 | 384.1791 | 389.4793 | 368.0447 | 329.1207 | 345.8868 | 306.6283 | -0.08381 | 0.615012 | 0.11893  | 0.484368  | -0.0982  | 0.73318  |
| AT4G39550 | AT4G39550 | 47.55616 | 37.46917 | 48.93086 | 40.82914   | 42.39791 | 43.86099 | 40.82914 | 20.49891 | 35.14486 | 34.54328 | 25.27635 | 29.00538 | -0.08577 | 0.81872  | -0.66461 | 0.042541  | -0.55527 | 0.250842 |
| AT4G39560 | AT4G39560 | 49.93397 | 74.98383 | 60.51975 | 61.86234   | 51.67245 | 75.7599  | 55.13682 | 73.36452 | 50.76479 | 48.53167 | 71.83803 | 58.01707 | 0.034182 | 0.92477  | -0.03331 | 0.931645  | 0.032587 | 0.964839 |
| AT4G39570 | AT4G39570 | 45.66172 | 55.31163 | 52.79383 | 47.42779   | 53.65985 | 44.85784 | 54.24751 | 48.55005 | 58.57469 | 58.36322 | 43.90102 | 48.68771 | 0.042577 | 0.905144 | 0.179731 | 0.958765  | 0.0014   | 0.998194 |
| AT4G39580 | AT4G39580 | 5.94452  | 1.784246 | 5.150617 | 38.76706   | 40.4105  | 42.86415 | 53.35821 | 37.76115 | 45.88356 | 3.838143 | 2.660668 | 8.287252 | 2.60489  | 3.02E-10 | 2.765183 | 2.85E-11  | 0.036303 | 0.980953 |
| AT4G39590 | AT4G39590 | 0        | 0        | 0        | 0.412416   | 0        | 0        | 0.889303 | 0        | 0.976246 | 2.878607 | 0        | 0        | 0.031922 | NA       | 0.297754 | NA        | 0.454963 | NA       |
| AT4G39600 | AT4G39600 | 23.77808 | 12.48972 | 15.45185 | 13.60971   | 9.937009 | 14.95261 | 14.22886 | 9.710009 | 8.786214 | 18.23118 | 14.63367 | 20.71813 | -0.50496 | 0.39169  | -0.58446 | 0.240373  | 0.030849 | NA       |
| AT4G39610 | AT4G39610 | 1.188904 | 3.568492 | 0        | 12.78488   | 12.58688 | 10.96525 | 10.67164 | 7.55223  | 9.76246  | 0.959536 | 0        | 0        | 2.037271 | 0.002093 | 1.67766  | 0.004871  | -0.52561 | NA       |
| AT4G39615 | AT4G39615 | 0        | 0        | 0        | 0          | 0        | 0        | 0        | 0        | 0        | 0        | 0        | 0        | #N/A     | #N/A     | #N/A     | #N/A      | #N/A     | #N/A     |
| AT4G39620 | EMB2453   | 269.8812 | 239.089  | 247.2296 | 186.8243   | 203.3775 | 215.3176 | 224.938  | 224.4091 | 191.3442 | 266.7509 | 309.9678 | 308.7001 | -0.32723 | 0.040101 | -0.23915 | 0.177557  | 0.217796 | 0.406722 |
| AT4G39630 | AT4G39630 | 36.85602 | 33.90067 | 36.05432 | 58.97543   | 53.65985 | 45.82624 | 32.90423 | 35.60337 | 47.12603 | 50.55269 | 50.55269 | 53.86714 | 0.618538 | 0.025392 | -0.03837 | 0.927005  | 0.411879 | 0.38561  |
| AT4G39640 | GGT1      | 586.1296 | 745.8148 | 664.5148 | 454.8944   | 431.9287 | 563.215  | 425.0871 | 470.396  | 427.5957 | 489.3632 | 440.3405 | 575.964  | -0.44046 | 0.007216 | -0.56645 | 0.000555  | -0.38063 | 0.106077 |
| AT4G39650 | GGT2      | 1.188904 | 0        | 2.575309 | 1.237247   | 0.662467 | 0        | 0.889303 | 2.15778  | 0        | 0        | 0        | 1.035907 | -0.26286 | 0.708636 | -0.11805 | 0.880137  | -0.4317  | NA       |
| AT4G39660 | AGT2      | 328.1375 | 280.1266 | 272.9827 | 328.2828   | 345.1454 | 318.989  | 316.592  | 295.6158 | 354.3773 | 265.7914 | 262.0758 | 513.9874 | 0.166267 | 0.326723 | 0.128324 | 0.499544  | -0.06189 | 0.863787 |
| AT4G39670 | AT4G39670 | 8.322328 | 10.70548 | 15.45185 | 22.7044    | 22.98761 | 21.32329 | 24.63371 | 24.70658 | 28.9451  | 2.878607 | 5.321336 | 6.215439 | 3.976349 | 1.31E-44 | 4.202836 | 1.23E-49  | -0.91655 | 0.145626 |
| AT4G39672 | AT4G39672 | 0        | 0        | 0        | 0          | 0        | 0        | 0        | 0        | 0        | 0        | 0        | 0        | #N/A     | #N/A     | #N/A     | #N/A      | #N/A     | #N/A     |
| AT4G39675 | AT4G39675 | 8.322328 | 7.136984 | 5.150617 | 2.886999   | 5.962205 | 4.984204 | 6.225124 | 2.15778  | 10.73871 | 1.919071 | 3.991002 | 5.179533 | -0.43771 | 0.513344 | -0.05691 | 0.944548  | -0.61029 | NA       |
| AT4G39680 | AT4G39680 | 1217.438 | 1209.719 | 1173.053 | 952.2676   | 900.9555 | 1010.797 | 1070.721 | 1016.314 | 707.7283 | 1257.951 | 1434.1   | 1175.754 | -0.32486 | 0.056771 | -0.3587  | 0.040104  | 0.100938 | 0.768975 |
| AT4G39690 | AT4G39690 | 392.3383 | 378.2602 | 343.8037 | 369.1119   | 349.1203 | 386.7742 | 355.7214 | 342.0081 | 320.2087 | 366.5426 | 332.5835 | 353.2441 | -0.01386 | 0.938908 | -0.12833 | 0.423237  | -0.0789  | 0.779875 |
| AT4G39700 | AT4G39700 | 2.377808 | 3.568492 | 2.575309 | 0.824831   | 0.662467 | 1.993682 | 0        | 3.23667  | 1.952492 | 0        | 1.330334 | 1.035907 | -0.62754 | 0.374129 | -0.34623 | 0.663535  | -0.75228 | NA       |
| AT4G39710 | PNSL4     | 393.5272 | 444.2773 | 410.7761 | 291.9902   | 331.8961 | 290.6807 | 446.4303 | 446.6604 | 553.5315 | 518.1492 | 452.3135 | 585.2872 | -0.43982 | 0.050328 | 0.128324 | 0.236253  | 0.317759 | 0.178321 |
| AT4G39720 | AT4G39720 | 11.88904 | 12.48972 | 12.87654 | 17.32145   | 11.26194 | 15.94945 | 10.67164 | 6.47334  | 2.928738 | 9.593536 | 9.312338 | 7.251466 | 0.246847 | 0.660984 | -0.70031 | 0.21004   | -0.41522 | NA       |
| AT4G39730 | AT4G39730 | 439.8945 | 513.8629 | 459.6926 | 525.005    | 584.9586 | 421.6636 | 407.301  | 334.4559 | 558.4127 | 532.5423 | 478.9202 | 494.1274 | 0.117712 | 0.632154 | -0.1145  | 0.655761  | 0.091609 | 0.838414 |
| AT4G39740 | HCC2      | 48.74506 | 58.88012 | 59.2321  | 83.72036   | 78.17114 | 57.81677 | 64.02985 | 63.65451 | 81.02842 | 47.97678 | 69.17737 | 53.86714 | 0.405798 | 0.139934 | 0.314454 | 0.306002  | 0.025981 | 0.97255  |
| AT4G39745 | AT4G39745 | 0        | 0        | 0        | 0          | 0        | 0        | 0        | 0        | 0        | 0        | 0        | 0        | #N/A     | #N/A     | #N/A     | #N/A      | #N/A     | #N/A     |
| AT4G39750 | AT4G39750 | 0        | 0        | 0        | 0          | 0        | 0        | 0        | 0        | 0        | 0        | 0        | 0        | #N/A     | #N/A     | #N/A     | #N/A      | #N/A     | #N/A     |
| AT4G39753 | AT4G39753 | 0        | 0        | 0        | 0          | 0        | 0        | 0        | 0        | 0        | 0        | 0        | 0        | #N/A     | #N/A     | #N/A     | #N/A      | #N/A     | #N/A     |
| AT4G39756 | AT4G39756 | 1.188904 | 0        | 0        | 0          | 0        | 0        | 0.889303 | 1.07889  | 0        | 0        | 1.330334 | 0        | -0.29581 | NA       | 0.12448  | NA        | -0.0131  | NA       |
| AT4G39760 | AT4G39760 | 0        | 0        | 0        | 0          | 0        | 0        | 1.07889  | 0        | 0        | 0        | 0        | 0        | 0.16673  | NA       | 0.16673  | NA        | 0        | NA       |
| AT4G39770 | TPPH      | 165.2576 | 114.1917 | 173.8333 | 52.37678   | 45.71024 | 69.77885 | 55.13682 | 28.05114 | 56.62227 | 110.3466 | 87.80204 | 133.6319 | -1.38317 | 1.57E-07 | -1.60174 | 3.76E-09  | -0.43334 | 0.331766 |
| AT4G39780 | ERF060    | 86.78999 | 60.66437 | 69.53333 | 84.95761   | 104.6698 | 80.7441  | 104.0485 | 83.07453 | 88.83839 | 72.92471 | 71.83803 | 48.68761 | 0.293628 | 0.272885 | 0.322086 | 0.254748  | -0.17695 | 0.734334 |
| AT4G39790 | AT4G39790 | 10.70014 | 1.784246 | 10.30123 | 57.73818   | 9.274542 | 2.990522 | 17.14428 | 9.710009 | 5.87476  | 12.47396 | 14.63367 | 14.50269 | -0.3039  | 0.628697 | -0.07591 | 0.919124  | 0.640562 | NA       |
| AT4G39795 | AT4G39795 | 4.755616 | 5.352738 | 3.862963 | 1.649662   | 3.974804 | 2.990522 | 0.889303 | 2.15778  | 0.976246 | 1.919071 | 2.666668 | 4.143626 | -0.45047 | 0.531339 | -0.98377 | 0.154732  | -0.41206 | NA       |
| AT4G39800 | IPS1      | 2758.257 | 2538.982 | 2541.83  | 428.0874   | 450.4777 | 461.5373 | 371.7289 | 378.6904 | 306.5412 | 2194.578 | 177.757  | 2088.388 | -2.53103 | 2.1E-137 | -2.86583 | 6.3E-163  | -0.27743 | 0.064275 |
| AT4G39810 | NEN4      | 1.188904 | 10.70548 | 7.725926 | 2.474493</ |          |          |          |          |          |          |          |          |          |          |          |           |          |          |

|           |           |          |          |          |          |          |          |          |          |          |          |          |           |          |          |          |          |          |          |
|-----------|-----------|----------|----------|----------|----------|----------|----------|----------|----------|----------|----------|----------|-----------|----------|----------|----------|----------|----------|----------|
| ATSG01090 | ATSG01090 | 312.6817 | 319.38   | 265.2568 | 186.8243 | 174.8914 | 191.3934 | 215.2114 | 174.7802 | 210.8691 | 260.9937 | 251.4331 | 298.3411  | -0.68528 | 6.56E-06 | -0.563   | 0.000434 | -0.13883 | 0.648366 |
| ATSG01100 | ATSG01100 | 22.58917 | 41.03766 | 19.31482 | 91.96667 | 86.12075 | 126.5988 | 95.15547 | 99.25787 | 78.09968 | 23.02886 | 21.28534 | 17.61041  | 1.799971 | 2.09E-10 | 1.653711 | 1.23E-08 | -0.33772 | 0.597514 |
| ATSG01110 | ATSG01110 | 27.34479 | 41.03766 | 19.31482 | 18.97112 | 12.58688 | 14.95261 | 16.00746 | 16.18335 | 18.54867 | 24.94793 | 21.28534 | 23.82585  | -0.77368 | 0.04155  | -0.67874 | 1.020856 | -0.25507 | 0.738177 |
| ATSG01120 | ATSG01120 | 22.58917 | 14.27397 | 14.1642  | 11.13522 | 10.59948 | 7.974726 | 10.67164 | 7.55223  | 6.833722 | 18.23118 | 9.312338 | 19.68222  | -0.66007 | 0.160663 | -0.867   | 0.082165 | -0.08551 | NA       |
| ATSG01130 | ATSG01130 | 0        | 0        | 0        | 0        | 0        | 0        | 0.889303 | 0        | 0.976246 | 0        | 0        | 0         | 0        | NA       | 0.309898 | NA       | 0        | NA       |
| ATSG01140 | ATSG01140 | 0        | 0        | 0        | 0        | 0        | 0        | 0.889303 | 0        | 0.976246 | 0        | 0        | 0         | 0        | NA       | 0.309898 | NA       | 0        | NA       |
| ATSG01150 | ATSG01150 | 1.188904 | 0        | 0        | 0        | 1.324935 | 0.996841 | 0.889303 | 1.07889  | 0        | 0.959536 | 0        | 0         | 0.150415 | NA       | 0.105754 | NA       | -0.05415 | NA       |
| ATSG01160 | ATSG01160 | 217.5694 | 178.4246 | 180.2716 | 181.8753 | 188.8032 | 198.3713 | 142.2886 | 211.4624 | 189.3917 | 214.936  | 251.4331 | 155.386   | -0.02412 | 0.935322 | -0.09024 | 0.755812 | -0.09519 | 0.84258  |
| ATSG01170 | ATSG01170 | 91.5456  | 62.44861 | 83.69753 | 51.13953 | 35.11077 | 42.86415 | 50.6903  | 56.10228 | 42.95482 | 62.36982 | 73.16837 | 85.9804   | -0.84176 | 0.001042 | -0.65257 | 0.018628 | -0.11305 | 0.849621 |
| ATSG01175 | ATSG01175 | 14.26685 | 24.97944 | 6.438272 | 19.38353 | 18.54908 | 15.94945 | 11.56095 | 12.94668 | 16.59618 | 35.50282 | 19.95501 | 16.57445  | 0.259652 | 0.621641 | -0.08856 | 0.089761 | 0.627932 | 0.39226  |
| ATSG01180 | NP#8.2    | 17.83356 | 24.97944 | 27.04074 | 6.186234 | 5.299738 | 1.993682 | 2.66791  | 4.31556  | 4.88123  | 6.835821 | 3.991002 | 17.251346 | -1.88726 | 4.97E-05 | -2.05962 | 3.15E-05 | -1.49198 | NA       |
| ATSG01185 | ATSG01185 | 0        | 1.784246 | 0        | 0        | 0.662467 | 0.996841 | 0        | 0        | 0        | 0        | 0        | 0         | 0.034784 | NA       | -0.2741  | NA       | -0.26587 | NA       |
| ATSG01190 | LAC10     | 13.07794 | 16.05821 | 12.87654 | 2.886909 | 3.312336 | 7.974726 | 4.446517 | 3.23667  | 1.952492 | 9.595356 | 10.64267 | 6.215439  | -1.33027 | 0.101235 | -1.57132 | 0.004143 | -0.54334 | NA       |
| ATSG01200 | ATSG01200 | 26.15589 | 12.48972 | 28.3284  | 28.86909 | 26.49869 | 27.91154 | 43.57587 | 33.44559 | 36.1211  | 21.10978 | 38.57969 | 27.96948  | 0.243423 | 0.554878 | 0.657445 | 0.081565 | 0.287414 | 0.682617 |
| ATSG01210 | ATSG01210 | 0        | 3.568492 | 1.287654 | 1.237247 | 2.649869 | 1.993682 | 0        | 0        | 1.952492 | 0.959536 | 1.330334 | 1.035907  | 0.213796 | 0.785796 | -0.36971 | 0.629233 | -0.14739 | NA       |
| ATSG01215 | ATSG01215 | 0        | 0        | 0        | 0.412416 | 0        | 0        | 1.778607 | 0        | 0        | 0        | 0        | 0         | 0.060593 | NA       | 0.260815 | NA       | 0        | NA       |
| ATSG01220 | SQD2      | 595.6409 | 615.5649 | 601.3346 | 405.4045 | 402.1176 | 445.5878 | 545.143  | 567.4961 | 591.6051 | 549.8139 | 458.9652 | 667.1238  | -0.52683 | 0.000317 | -0.0871  | 0.651607 | -0.10747 | 0.722193 |
| ATSG01225 | ATSG01225 | 1.188904 | 1.784246 | 0        | 2.886909 | 4.637271 | 2.990522 | 0.889303 | 1.07889  | 0        | 0        | 0        | 1.035907  | 0.970235 | 0.13729  | -0.16968 | 0.837613 | -0.31478 | NA       |
| ATSG01230 | ATSG01230 | 79.65566 | 64.23286 | 52.79383 | 113.8267 | 131.1685 | 115.6335 | 80.03731 | 83.07453 | 65.40848 | 70.0461  | 50.55269 | 68.36983  | 0.840219 | 0.000205 | 0.200031 | 0.502745 | -0.04966 | 0.938001 |
| ATSG01240 | LAX1      | 267.5034 | 317.5958 | 244.6543 | 162.0793 | 146.4053 | 183.4187 | 148.5137 | 233.0402 | 171.8193 | 220.6932 | 284.6915 | 224.7917  | -0.73321 | 0.000247 | -0.56735 | 0.007045 | -0.17852 | 0.650078 |
| ATSG01250 | ATSG01250 | 5.94452  | 10.70548 | 6.438272 | 26.3946  | 25.83622 | 19.93682 | 24.9005  | 32.3667  | 30.26363 | 5.757214 | 10.64267 | 8.287252  | 1.45433  | 0.000586 | 1.681642 | 7.96E-05 | 0.062149 | 0.951629 |
| ATSG01260 | ATSG01260 | 216.3805 | 174.8561 | 199.5864 | 133.2102 | 145.7428 | 150.523  | 180.5286 | 181.2535 | 166.9381 | 229.3219 | 215.5141 | 228.9353  | -0.47059 | 0.003039 | -0.16682 | 0.385658 | 0.179618 | 0.96329  |
| ATSG01270 | CPL2      | 376.8826 | 346.1437 | 352.8173 | 300.651  | 336.5334 | 328.9575 | 310.3669 | 353.8759 | 276.2776 | 355.9877 | 315.2892 | 349.1005  | -0.15855 | 0.325447 | -0.19519 | 0.244597 | -0.07469 | 0.815889 |
| ATSG01280 | ATSG01280 | 0        | 0        | 0        | 0.824831 | 0        | 0        | 0        | 0        | 0        | 0        | 0        | 1.035907  | 0.136071 | NA       | 0.0      | NA       | 0        | NA       |
| ATSG01290 | ATSG01290 | 206.8693 | 206.9725 | 213.7506 | 202.0836 | 193.4404 | 217.3113 | 214.3221 | 219.0147 | 144.4844 | 192.8667 | 196.8894 | 213.3967  | -0.03684 | 0.878826 | -0.11743 | 0.618351 | -0.05608 | 0.898488 |
| ATSG01300 | ATSG01300 | 0        | 0        | 2.575309 | 1.237247 | 2.649869 | 1.993682 | 0.889303 | 2.15778  | 0.976246 | 0.959536 | 2.660668 | 2.071813  | 0.41376  | 0.573958 | 0.155594 | 0.855413 | 0.368055 | 0.0      |
| ATSG01310 | BHLH140   | 76.08985 | 76.72258 | 69.53333 | 65.98649 | 58.29712 | 53.8294  | 67.58706 | 71.20674 | 36.1211  | 97.87263 | 75.82904 | 81.83662  | -0.29232 | 0.319691 | -0.32888 | 0.292638 | 0.200175 | 0.703109 |
| ATSG01320 | PCD4      | 13.07794 | 14.27397 | 15.45185 | 3.299235 | 0.662467 | 2.990522 | 3.557214 | 3.39445  | 2.928738 | 15.35257 | 14.63367 | 15.5386   | -1.97433 | 7.98E-05 | -1.4526  | 0.006166 | 0.100155 | NA       |
| ATSG01330 | PCD3      | 4.755616 | 7.136984 | 2.575309 | 2.886909 | 1.324935 | 0.996841 | 3.557214 | 2.15778  | 0.976246 | 6.716749 | 3.991002 | 8.287252  | -0.80874 | 0.221027 | -0.6293  | 0.387472 | 0.348298 | NA       |
| ATSG01335 | ATSG01335 | 9.511232 | 3.568492 | 1.510617 | 4.356571 | 1.324935 | 0.996841 | 3.557214 | 1.07889  | 0.976246 | 6.716749 | 3.912338 | 5.179533  | -0.84821 | 0.190335 | -1.01504 | 0.131129 | 0.132688 | NA       |
| ATSG01340 | SFC1      | 47.55616 | 48.17464 | 45.0679  | 63.92441 | 70.22153 | 65.79149 | 49.80099 | 45.31338 | 41.00233 | 46.05771 | 34.58868 | 49.72351  | 0.487881 | 0.063911 | -0.04314 | 0.096468 | -0.09004 | 0.888185 |
| ATSG01350 | ATSG01350 | 417.3053 | 499.5889 | 462.2679 | 183.6517 | 910.23   | 738.659  | 642.9664 | 516.7094 | 876.6689 | 521.0278 | 614.6143 | 504.4855  | 0.804879 | 2.41E-05 | 0.549643 | 0.006543 | 0.243883 | 0.485186 |
| ATSG01360 | TBL3      | 8.322328 | 10.70548 | 10.30123 | 3.71174  | 5.299738 | 2.990522 | 9.782338 | 7.55223  | 6.833722 | 17.27164 | 9.312338 | 10.35907  | -0.98443 | 0.065296 | -0.20396 | 0.764953 | 0.316337 | NA       |
| ATSG01365 | ATSG01365 | 0        | 0        | 0        | 0        | 0        | 0        | 0        | 0        | 0        | 0        | 0        | 0         | #N/A     | #N/A     | #N/A     | #N/A     | #N/A     | #N/A     |
| ATSG01370 | AC11      | 67.76752 | 42.8219  | 63.09506 | 34.23049 | 46.37271 | 44.85784 | 48.91169 | 34.52448 | 43.93107 | 67.16749 | 51.88302 | 62.15439  | -0.48555 | 0.092816 | -0.43743 | 0.167015 | 0.046612 | 0.949332 |
| ATSG01380 | GT-3A     | 0        | 3.568492 | 1.287654 | 0.660727 | 6.624673 | 9.968408 | 14.22886 | 10.7889  | 14.64369 | 0.959536 | 1.330334 | 0         | 1.546202 | 0.007953 | 2.094454 | 0.00025  | -0.35323 | NA       |
| ATSG01390 | ATSG01390 | 146.2352 | 174.8561 | 103.0123 | 138.984  | 166.9418 | 142.5482 | 134.2848 | 122.9935 | 140.5794 | 137.2136 | 131.7031 | 127.4165  | 0.091383 | 0.719039 | -0.07516 | 0.790948 | -0.11831 | 0.866179 |
| ATSG01400 | ESP4      | 498.1508 | 442.493  | 462.2679 | 362.1009 | 293.473  | 389.764  | 436.648  | 432.6349 | 322.1612 | 517.1897 | 594.6593 | 881.2136  | -0.4166  | 0.041894 | -0.23095 | 0.321604 | 0.084119 | 0.852822 |
| ATSG01410 | PDX13     | 1320.872 | 1345.322 | 1391.954 | 1296.635 | 1444.179 | 1119.452 | 1456.679 | 1546.049 | 2080.38  | 1452.737 | 1370.244 | 1284.524  | -0.06987 | 0.732399 | 0.319377 | 0.065986 | 0.017222 | 0.970242 |
| ATSG01420 | ATSG01420 | 11.88904 | 3.568492 | 11.58889 | 16.49662 | 11.92441 | 11.96209 | 10.67164 | 16.18335 | 11.71495 | 13.4335  | 10.64267 | 18.64632  | 0.442194 | 0.398644 | 0.350165 | 0.549676 | 0.49698  | NA       |
| ATSG01430 | ATSG01430 | 91.5456  | 83.85956 | 83.69753 | 178.1635 | 215.3019 | 149.5221 | 125.3918 | 100.3368 | 178.653  | 98.83217 | 70.5077  | 75.62118  | 1.02584  | 2.37E-05 | 0.612619 | 0.022281 | -0.07353 | 0.908744 |
| ATSG01440 | ATSG01440 | 0        | 0        | 0        | 0        | 0        | 0        | 0        | 0        | 0        | 0        | 1.330334 | 1.035907  | 0        | NA       | 0        | NA       | 0        | NA       |
| ATSG01445 | ATSG01445 | 10.70014 | 1.784246 | 6.438272 | 5.361402 | 7.949607 | 8.971567 | 5.335821 | 1.07889  | 3.904984 | 9.595356 | 10.64267 | 9.323159  | 0.092773 | 0.889817 | -0.63345 | 0.34166  | 0.437765 | NA       |
| ATSG01450 | ATSG01450 | 110.5681 | 139.1712 | 141.642  | 202.496  | 172.2415 | 198.3713 | 200.9933 | 157.5179 | 170.843  | 107.468  | 95.78405 | 98.41112  | 0.546571 | 0.003188 | 0.433632 | 0.303508 | -0.35491 | 0.260491 |
| ATSG01460 | ATSG01460 | 466.0503 | 421.0821 | 385.0086 | 268.4825 | 265.6494 | 284.0996 | 294.3595 | 290.2214 | 209.8299 | 302.2537 | 282.0308 | 362.5703  | -0.62697 | 0.006185 | -0.66657 | 0.000102 | -0.41628 | 0.895338 |
| ATSG01470 | ATSG01470 | 47.55616 | 39.25341 | 78.54691 | 72.17273 | 64.92179 | 62.80097 | 61.36594 | 56.10228 | 71.26596 | 46.05771 | 61.19536 | 76.65708  | 0.24881  | 0.044795 | 0.164321 | 0.658822 | 0.124726 | 0.851386 |
| ATSG01480 | ATSG01480 | 4.755616 | 7.136984 | 10.30123 | 6.186234 | 6.624673 | 5.981045 | 8.893035 | 4.31556  | 6.833722 | 8.635821 | 2.660668 | 8.287252  | -0.17115 | 0.796043 | -0.09213 | 0.904422 | -0.09554 | NA       |
| ATSG01490 | CAX4      | 0        | 0        | 0        | 0.412416 | 1.324935 | 0        | 1.07889  | 0        | 0        | 0        | 0        | 0         | 0.316618 | NA       | 0.168182 | NA       | 0        | NA       |
| ATSG01500 | TAA2      | 178.3356 | 96.34929 | 160.9568 | 171.9773 | 163.6294 | 180.4282 | 173.4142 | 151.0446 | 206.9642 | 140.0922 | 150.3277 | 139.8474  | 0.21618  | 0.370732 | 0.260211 | 0.29785  | -0.0385  | 0.947036 |
| ATSG01510 | RUS5      | 146.2352 | 137.3869 | 135.2037 | 107.6405 | 107.3197 | 103.6714 | 136.6304 | 121.9146 | 114.2208 | 160.2424 | 158.3097 | 150.2064  | -0.38627 | 0.030698 | -0.1666  | 0.438565 | 0.15738  | 0.637513 |
| ATSG01520 | ATSG01520 | 194.9802 | 233.7362 | 197.0111 | 99.39215 | 119.2441 | 110.6493 | 170.7463 | 141.3346 | 159.1281 | 196.7048 | 235.4691 | 222.7199  | -0.90704 | 4.98E-08 | -0.39006 | 0.035972 | 0.069005 | 0.862669 |
| ATSG01530 | LHC8.1    | 18747.83 | 23022.13 | 19836.32 | 10684.04 | 8848.575 | 9400.209 | 9882.83  | 11411.42 | 12508.64 | 19731.89 | 17358.2  | 19649.08  | -1.07629 | 9.15E-17 | -0.85489 | 7.       |          |          |

|           |           |          |          |          |          |          |          |          |          |          |          |          |          |          |          |          |          |          |          |    |
|-----------|-----------|----------|----------|----------|----------|----------|----------|----------|----------|----------|----------|----------|----------|----------|----------|----------|----------|----------|----------|----|
| ATSG01980 | ATSG01980 | 197.3581 | 176.6404 | 149.3679 | 161.6669 | 163.6294 | 180.4282 | 141.3993 | 210.3835 | 158.1519 | 122.8206 | 101.1054 | 109.8061 | -0.05272 | 0.838938 | -0.04168 | 0.883623 | -0.62587 | 0.019504 |    |
| ATSG01990 | ATSG01990 | 99.86793 | 92.78079 | 61.80741 | 107.228  | 93.40789 | 115.6335 | 82.70522 | 111.1257 | 92.74337 | 57.57214 | 46.56169 | 63.1903  | 0.303717 | 0.241999 | 0.164684 | 0.588869 | -0.56486 | 0.127717 |    |
| ATSG02000 | ATSG02000 | 0        | 0        | 0        | 0        | 0        | 0        | 0        | 0        | 0.959536 | 0        | 0        | 0        | 0        | NA       | 0        | NA       | 0        | 0.171512 | NA |
| ATSG02010 | ROPGEF7   | 129.5905 | 128.4657 | 130.0531 | 93.61834 | 77.50867 | 95.69671 | 109.3843 | 106.8101 | 72.2422  | 165.0401 | 141.0154 | 120.1652 | -0.52578 | 0.017639 | -0.4144  | 0.086442 | 0.133245 | 0.770425 |    |
| ATSG02020 | SIS       | 93.92341 | 117.7602 | 104.3    | 129.9109 | 117.9192 | 78.75042 | 120.056  | 97.10009 | 132.7695 | 62.36982 | 51.88302 | 66.29802 | 0.07388  | 0.8104   | 0.152905 | 0.618301 | -0.75598 | 0.021276 |    |
| ATSG02021 | ATSG02021 | 0        | 0        | 0        | 0        | 0        | 0        | 0        | 0        | 0        | 0        | 0        | 0        | #N/A     | #N/A     | #N/A     | #N/A     | #N/A     | #N/A     |    |
| ATSG02025 | ATSG02025 | 0        | 0        | 0        | 0        | 0        | 0        | 0        | 0        | 0        | 0        | 0        | 0        | #N/A     | #N/A     | #N/A     | #N/A     | #N/A     | #N/A     |    |
| ATSG02030 | BLH9      | 129.5905 | 89.2123  | 92.71111 | 115.8888 | 95.39529 | 104.6683 | 100.4913 | 115.4412 | 88.83839 | 83.4796  | 94.45371 | 92.19568 | 0.012669 | 0.966029 | -0.04594 | 0.882951 | -0.21532 | 0.606829 |    |
| ATSG02035 | ATSG02035 | 0        | 0        | 0        | 0        | 0        | 0        | 0        | 0        | 0        | 0        | 0        | 0        | #N/A     | #N/A     | #N/A     | #N/A     | #N/A     | #N/A     |    |
| ATSG02040 | PRA1A1    | 91.5456  | 110.6233 | 115.8889 | 222.292  | 192.778  | 200.365  | 165.4104 | 155.3602 | 164.9856 | 91.15588 | 59.86503 | 75.62118 | 0.941347 | 2.63E-07 | 0.602148 | 0.002557 | -0.45186 | 0.15151  |    |
| ATSG02050 | ATSG02050 | 279.3924 | 242.6575 | 249.8049 | 288.6909 | 335.2084 | 235.2544 | 237.444  | 236.2769 | 369.9972 | 266.7509 | 267.3971 | 289.0179 | 0.15174  | 0.53789  | 0.122416 | 0.650677 | 0.088008 | 0.855952 |    |
| ATSG02060 | ATSG02060 | 16.64466 | 26.76369 | 23.17778 | 20.20836 | 25.17376 | 35.88627 | 9.782338 | 15.10446 | 25.3824  | 24.94793 | 15.96401 | 23.82585 | 0.249472 | 0.599701 | -0.34265 | 0.499878 | -0.00319 | 0.997567 |    |
| ATSG02070 | WAKL20    | 38.04493 | 28.54794 | 47.64321 | 25.98218 | 23.18635 | 26.9147  | 18.67537 | 18.34113 | 12.6912  | 36.46235 | 35.91902 | 32.1131  | -0.56698 | 0.086415 | -1.11686 | 0.001178 | -0.13769 | 0.850918 |    |
| ATSG02080 | ATSG02080 | 41.61164 | 44.60615 | 30.9037  | 42.06639 | 54.32232 | 34.88943 | 41.79726 | 22.65669 | 27.33489 | 58.53167 | 53.21336 | 54.90305 | 0.173699 | 0.639501 | -0.30548 | 0.429358 | 0.49026  | 0.325299 |    |
| ATSG02090 | ATSG02090 | 3.566712 | 3.568492 | 10.30123 | 9.485558 | 11.92441 | 6.977885 | 4.446517 | 4.31556  | 6.833722 | 15.35257 | 17.29434 | 14.50269 | 0.530957 | 0.354256 | -0.15878 | 0.831555 | 1.124761 | NA       |    |
| ATSG02100 | ORP3A     | 64.20081 | 49.95889 | 61.80741 | 182.7001 | 170.2541 | 178.4345 | 154.7388 | 156.439  | 162.0568 | 71.96517 | 49.22236 | 74.58527 | 1.532971 | 2.93E-15 | 1.366042 | 8.78E-12 | 0.144794 | 0.764628 |    |
| ATSG02110 | CYCD7-1   | 1.188904 | 1.784246 | 1.287654 | 1.237247 | 2.649869 | 1.993682 | 1.778607 | 1.07889  | 1.952492 | 0.959536 | 1.330334 | 1.035907 | 0.228252 | 0.775191 | 0.092741 | 0.915695 | -0.13673 | NA       |    |
| ATSG02120 | HILP      | 235.405  | 173.0719 | 239.5037 | 212.8064 | 261.0121 | 139.5577 | 194.7575 | 131.6246 | 350.4732 | 372.2998 | 367.1722 | 494.1274 | -0.07409 | 0.856362 | 0.05584  | 0.899269 | 0.866384 | 0.034126 |    |
| ATSG02130 | NDP1      | 68.95643 | 142.7397 | 108.163  | 132.7978 | 140.4431 | 131.583  | 146.7351 | 152.1235 | 135.6982 | 119.942  | 126.3817 | 112.9138 | 0.354608 | 0.132751 | 0.452702 | 0.059715 | 0.184829 | 0.679323 |    |
| ATSG02140 | ATSG02140 | 3.566712 | 0        | 5.150617 | 2.062078 | 2.649869 | 0        | 1.778607 | 3.23667  | 1.952492 | 0.959536 | 0        | 0.071813 | -0.42174 | 0.572537 | -0.2031  | 0.813313 | -0.65534 | NA       |    |
| ATSG02150 | Fes1C     | 249.6698 | 265.8527 | 320.6259 | 336.1187 | 378.2688 | 340.9195 | 423.3085 | 358.1915 | 341.6861 | 318.5658 | 373.8238 | 329.4183 | 0.328647 | 0.046364 | 0.418788 | 0.011869 | 0.729827 | 0.276934 |    |
| ATSG02160 | ATSG02160 | 2549.01  | 2695.996 | 2789.059 | 1562.643 | 1505.788 | 1347.729 | 1881.766 | 1601.073 | 2652.46  | 3151.115 | 4316.934 | 3471.323 | -0.84208 | 0.19E-06 | -0.37953 | 0.063958 | 0.434637 | 0.110671 |    |
| ATSG02170 | ATSG02170 | 21.40027 | 17.84246 | 18.02716 | 7.011065 | 5.962205 | 11.96209 | 8.003731 | 5.39445  | 6.833722 | 17.27164 | 21.28534 | 16.5745  | -1.10116 | 0.011269 | -1.25522 | 0.007205 | -0.05701 | NA       |    |
| ATSG02180 | ATSG02180 | 477.9394 | 551.332  | 457.1173 | 176.5139 | 175.5538 | 214.3208 | 246.3371 | 192.0424 | 94.69586 | 467.2939 | 364.5115 | 430.9731 | -1.33153 | 6.58E-08 | -1.40866 | 1.43E-07 | -0.22215 | 0.653508 |    |
| ATSG02190 | PCS1      | 68.95643 | 57.09587 | 39.91728 | 20.62078 | 20.53649 | 23.92418 | 13.39955 | 14.02557 | 14.64369 | 30.70514 | 57.20436 | 50.75942 | -1.2665  | 6.39E-05 | -1.80661 | 1.25E-07 | -0.256   | 0.684908 |    |
| ATSG02200 | FHL       | 29.7226  | 39.25341 | 34.76667 | 17.73387 | 21.86142 | 31.8989  | 21.34328 | 16.18335 | 16.59618 | 26.867   | 26.60668 | 32.1131  | -0.52922 | 0.140813 | -0.83514 | 0.02577  | -0.23878 | 0.734334 |    |
| ATSG02210 | ATSG02210 | 2.377808 | 3.568492 | 2.575309 | 1.649662 | 1.987402 | 0        | 0.889303 | 2.15778  | 0.976246 | 0        | 1.330334 | 2.071813 | -0.50664 | 0.488566 | -0.49727 | 0.514422 | -0.58475 | NA       |    |
| ATSG02220 | ATSG02220 | 3.566712 | 1.784246 | 0        | 2.474493 | 1.987402 | 0        | 1.778607 | 2.15778  | 4.88123  | 0        | 1.330334 | 1.035907 | -0.06537 | 0.93993  | 0.358239 | 0.673225 | -0.42003 | NA       |    |
| ATSG02230 | ATSG02230 | 159.3131 | 169.5034 | 186.7099 | 82.0707  | 90.09555 | 67.78517 | 83.59453 | 80.91675 | 56.62227 | 252.3579 | 210.1928 | 179.2118 | -1.05889 | 2.32E-07 | -1.17948 | 2.77E-08 | 0.310935 | 0.368413 |    |
| ATSG02240 | ATSG02240 | 1098.547 | 1361.38  | 1394.53  | 1870.305 | 1958.253 | 1784.345 | 1933.346 | 1985.157 | 2648.555 | 1943.06  | 1874.441 | 1632.589 | 0.534281 | 0.000727 | 0.756787 | 9.26E-07 | 0.492163 | 0.016482 |    |
| ATSG02244 | ATSG02244 | 91.5456  | 132.0342 | 133.9161 | 207.0326 | 190.1281 | 156.504  | 108.495  | 105.7312 | 172.7955 | 129.5373 | 147.6671 | 129.4883 | 0.622722 | 0.009124 | 0.117273 | 0.714512 | 0.182882 | 0.706832 |    |
| ATSG02250 | RNR1      | 454.1613 | 483.5307 | 435.2272 | 302.3006 | 279.5612 | 312.0112 | 407.301  | 465.0016 | 319.2324 | 467.2939 | 448.3225 | 449.5834 | -0.06769 | 5.64E-05 | -0.20041 | 0.264886 | -0.00539 | 0.990348 |    |
| ATSG02260 | EXPA9     | 36.85602 | 37.46917 | 23.17778 | 35.05532 | 34.4483  | 32.89575 | 24.9005  | 28.05114 | 33.19236 | 34.54328 | 13.30334 | 21.75404 | 0.081535 | 0.854528 | -0.15637 | 0.737361 | -0.40173 | 0.536375 |    |
| ATSG02270 | ABX20     | 164.0687 | 151.6609 | 160.9568 | 218.1678 | 237.8258 | 226.2829 | 168.0784 | 187.7268 | 253.824  | 198.6239 | 267.3971 | 190.6068 | 0.499443 | 0.01474  | 0.340941 | 0.133364 | 0.493569 | 0.14712  |    |
| ATSG02280 | ATSG02280 | 84.41218 | 55.31163 | 91.42346 | 98.80457 | 82.80841 | 50.83888 | 68.47637 | 52.86561 | 91.76712 | 97.87263 | 97.11438 | 104.6266 | 0.020415 | 0.959743 | -0.1226  | 0.759198 | 0.39849  | 0.512425 |    |
| ATSG02290 | NAK       | 342.4043 | 446.0615 | 413.337  | 901.9529 | 888.3686 | 988.8661 | 803.041  | 860.9542 | 771.2343 | 260.0342 | 266.0668 | 282.8205 | 1.201207 | 2.67E-22 | 1.01341  | 9.01E-16 | -0.55594 | 0.001022 |    |
| ATSG02310 | PRTE      | 1094.981 | 877.849  | 873.148  | 403.7548 | 401.4552 | 595.1139 | 713.2214 | 786.5108 | 387.5597 | 738.8424 | 811.5037 | 712.7037 | -0.97683 | 3.81E-05 | -0.56051 | 0.029833 | -0.30913 | 0.649697 |    |
| ATSG02320 | ATMYB3R5  | 47.55616 | 30.33218 | 42.49259 | 68.8734  | 63.59686 | 86.72515 | 67.58706 | 75.5223  | 67.36097 | 39.34096 | 51.88302 | 40.40035 | 0.783721 | 0.002898 | 0.738035 | 0.007875 | 0.080195 | 0.906687 |    |
| ATSG02330 | ATSG02330 | 2.377808 | 0        | 0        | 0        | 0.662467 | 0        | 0        | 0        | 0        | 0        | 0        | 0        | -0.24088 | NA       | -0.35162 | NA       | -0.34611 | NA       |    |
| ATSG02340 | ATSG02340 | 0        | 1.784246 | 0        | 0.412416 | 0        | 0        | 1.778607 | 1.07889  | 0        | 0        | 0.959536 | 0        | -0.22669 | NA       | 0.227233 | NA       | -0.08521 | NA       |    |
| ATSG02350 | ATSG02350 | 0        | 1.784246 | 1.287654 | 0.412416 | 0.662467 | 0.996841 | 0.889303 | 0        | 0        | 0        | 0        | 0        | -0.13112 | NA       | -0.32579 | NA       | -0.103   | NA       |    |
| ATSG02360 | ATSG02360 | 0        | 0        | 0        | 0.662467 | 0        | 0        | 1.07889  | 0        | 0        | 0        | 0        | 0        | 0.098648 | NA       | 0.150881 | NA       | 0        | NA       |    |
| ATSG02370 | ATSG02370 | 41.61164 | 53.52738 | 50.21852 | 56.50093 | 52.99738 | 58.81361 | 55.13682 | 60.41784 | 35.14486 | 72.92471 | 65.18636 | 67.33392 | 0.208934 | 0.499603 | 0.056985 | 0.883074 | 0.490436 | 0.239857 |    |
| ATSG02380 | MTZ8      | 1276.883 | 1381.006 | 1456.337 | 2079.399 | 2114.596 | 1430.467 | 1140.976 | 1112.336 | 2297.107 | 1946.898 | 2221.658 | 1525.89  | 0.430775 | 0.124676 | 0.138606 | 0.685739 | 0.446867 | 0.285837 |    |
| ATSG02385 | ATSG02385 | 0        | 0        | 0        | 0        | 0        | 0        | 0        | 0        | 0        | 0        | 0        | 0        | #N/A     | #N/A     | #N/A     | #N/A     | #N/A     | #N/A     |    |
| ATSG02390 | ATSG02390 | 0        | 5.352738 | 2.575309 | 0.824831 | 1.987402 | 1.993682 | 0.889303 | 2.15778  | 0.976246 | 2.878607 | 1.330334 | 3.10772  | -0.32797 | 0.617124 | -0.39625 | 0.618301 | 0.035843 | NA       |    |
| ATSG02400 | PLL2      | 22.58917 | 21.41095 | 23.17778 | 18.5587  | 7.949607 | 14.95261 | 16.00746 | 12.94668 | 7.809968 | 20.15025 | 14.63367 | 21.75404 | -0.593   | 0.182233 | -0.74971 | 0.110833 | -0.20719 | 0.822249 |    |
| ATSG02410 | ATSG02410 | 161.6909 | 153.4452 | 169.9704 | 188.0615 | 171.579  | 240.2386 | 159.1853 | 145.6501 | 106.4108 | 142.9708 | 117.0694 | 136.7507 | 0.288239 | 0.194981 | -0.23281 | 0.351036 | -0.27876 | 0.45019  |    |
| ATSG02420 | SMR3      | 3.566712 | 3.568492 | 6.438272 | 8.248311 | 6.624673 | 9.968408 | 12.45025 | 8.63112  | 7.809968 | 4.796768 | 6.56167  | 9.323159 | 0.602768 | 0.308853 | 0.798313 | 0.187169 | 0.404639 | NA       |    |
| ATSG02430 | ATSG02430 | 48.74506 | 24.97944 | 29.61605 | 22.27044 | 17.88662 | 24.92102 | 24.01119 | 17.26224 | 18.54867 | 37.42189 | 29.26735 | 44.54398 | -0.64752 | 0.071647 | -0.73521 | 0.055397 | 0.085412 | 0.920201 |    |
| ATSG02435 | ATSG02435 | 0        | 0        | 0        | 0        | 0.662467 | 0        | 0        | 0        | 0        | 0        | 0        | 0        | 0.128567 | NA       | 0        | NA       | 0        | NA       |    |
| ATSG02440 | ATSG02440 | 34.47821 | 24.97944 | 32.19136 | 30.10634 | 23.84882 | 19.93682 | 16.00746 | 15.10446 | 20.50117 | 36.46235 | 45.23135 | 36.25673 | -0.27058 | 0.479979 | -0.76851 | 0.040575 | 0.316802 | 0.606351 |    |
| ATSG02450 | RPL36C    | 1186.526 | 984.9038 | 1175     |          |          |          |          |          |          |          |          |          |          |          |          |          |          |          |    |



|           |           |          |          |          |          |          |          |          |          |          |          |           |          |          |          |           |          |           |          |
|-----------|-----------|----------|----------|----------|----------|----------|----------|----------|----------|----------|----------|-----------|----------|----------|----------|-----------|----------|-----------|----------|
| ATSG03795 | ATSG03795 | 9.511232 | 1.784246 | 3.862963 | 2.062078 | 3.312336 | 1.993682 | 3.557214 | 2.15778  | 1.952492 | 0.959536 | 6.65167   | 7.251346 | -0.68453 | 0.314566 | -0.62101  | 0.396971 | -0.07349  | NA       |
| ATSG03800 | EMB175    | 123.646  | 80.29107 | 92.71111 | 59.80026 | 72.20893 | 73.76622 | 79.14801 | 93.86342 | 57.59851 | 100.7512 | 115.7391  | 98.41112 | -0.53302 | 0.032248 | -0.36562  | 0.188611 | 0.065596  | 0.91224  |
| ATSG03810 | ATSG03810 | 0        | 0        | 0        | 0        | 0        | 0        | 0        | 1.07889  | 0        | 0        | 0         | 0        | 0        | NA       | 0.16673   | NA       | 0         | NA       |
| ATSG03820 | ATSG03820 | 0        | 0        | 0        | 0        | 0        | 0        | 0.996841 | 1.778607 | 0        | 0        | 0         | 0        | 0.124069 | NA       | 0.253321  | NA       | 0         | NA       |
| ATSG03830 | ATSG03830 | 147.4241 | 133.8185 | 172.5457 | 166.6159 | 176.2163 | 152.5166 | 198.3147 | 141.3346 | 202.0829 | 149.6876 | 130.3727  | 202.0018 | 0.11999  | 0.650275 | 0.245381  | 0.337963 | 0.083987  | 0.869056 |
| ATSG03837 | ATSG03837 | 0        | 0        | 0        | 0        | 0        | 0        | 0        | 0        | 0        | 0        | 0         | 0        | #N/A     | #N/A     | #N/A      | #N/A     | #N/A      | #N/A     |
| ATSG03840 | FL1       | 23.77808 | 16.05821 | 21.89012 | 15.25938 | 15.23675 | 9.968408 | 8.003731 | 10.7889  | 13.66744 | 27.82653 | 19.95501  | 20.71813 | -0.52803 | 0.219582 | -0.83068  | 0.064986 | 0.130771  | 0.887443 |
| ATSG03850 | SFZ82A    | 568.2961 | 431.7875 | 508.6235 | 634.7076 | 769.787  | 515.3667 | 439.3159 | 390.5582 | 939.1486 | 441.3864 | 560.0706  | 520.0251 | 0.328529 | 0.295983 | 0.215927  | 0.537535 | 0.00924   | 0.99624  |
| ATSG03858 | ATSG03858 | 0        | 0        | 0        | 0.412416 | 0.662467 | 0        | 0        | 0        | 0        | 0        | 0         | 0        | 0.196313 | NA       | 0         | NA       | 0         | NA       |
| ATSG03860 | MLS       | 2.377808 | 1.784246 | 2.575309 | 1.649662 | 1.324935 | 0.996841 | 1.778607 | 6.47334  | 0.976246 | 4.797678 | 3.991002  | 2.071813 | -0.39238 | 0.602676 | -0.217498 | 0.799415 | 0.379578  | NA       |
| ATSG03870 | ATSG03870 | 51.12287 | 49.95889 | 38.62963 | 46.19054 | 42.39791 | 41.86731 | 26.6791  | 34.52448 | 50.76479 | 48.93632 | 37.24935  | 51.79533 | -0.08244 | 0.829611 | -0.29977  | 0.411063 | -0.00246  | 0.997319 |
| ATSG03880 | ATSG03880 | 1245.971 | 1354.243 | 1625.02  | 969.1766 | 989.7261 | 939.024  | 1555.392 | 1560.075 | 1778.72  | 1698.378 | 1564.473  | 1783.831 | -0.53767 | 2.67E-05 | 0.209485  | 0.154587 | 0.253839  | 0.208946 |
| ATSG03890 | ATSG03890 | 3.566712 | 1.784246 | 3.862963 | 12.78488 | 13.91181 | 15.94945 | 9.782338 | 11.86779 | 23.4299  | 5.75214  | 6.65167   | 4.143626 | 1.543359 | 0.003288 | 1.61063   | 0.002807 | 0.439983  | NA       |
| ATSG03900 | ATSG03900 | 860.7665 | 783.284  | 921.9605 | 743.1729 | 676.3791 | 752.6148 | 857.2886 | 895.4786 | 713.6358 | 804.0909 | 811.5037  | 870.1615 | -0.24037 | 0.081347 | -0.05899  | 0.737207 | -0.04732  | 0.87843  |
| ATSG03905 | ATSG03905 | 67.76752 | 112.4075 | 105.5877 | 184.7622 | 182.841  | 171.4566 | 187.643  | 157.5179 | 188.4155 | 105.5489 | 91.79304  | 121.2001 | 0.909551 | 5.69E-06 | 0.893527  | 1.38E-05 | 0.1734    | 0.68855  |
| ATSG03910 | ABC29     | 628.9302 | 642.3286 | 670.8679 | 369.1119 | 361.7071 | 459.5436 | 666.0883 | 594.4684 | 475.4318 | 614.1028 | 622.5963  | 621.5439 | -0.70075 | 3.5E-06  | -0.15864  | 0.398819 | -0.06274  | 0.862916 |
| ATSG03920 | ATSG03920 | 0        | 0        | 0        | 0        | 0        | 0        | 0.889303 | 0        | 0        | 0        | 0         | 0        | 0        | NA       | 0         | NA       | 0         | NA       |
| ATSG03930 | ATSG03930 | 0        | 0        | 0        | 0        | 0        | 0        | 0.996841 | 0        | 0        | 0        | 0         | 0        | 0.15625  | NA       | 0         | NA       | 0         | NA       |
| ATSG03940 | ATSG03940 | 2125.76  | 2232.092 | 2167.122 | 1434.794 | 1430.929 | 1645.784 | 1894.216 | 2002.42  | 2101.858 | 2789.37  | 3384.37   | 2460.278 | -0.52675 | 8.88E-05 | -0.11967  | 0.478661 | 0.398645  | 0.026272 |
| ATSG03944 | ATSG03944 | 0        | 0        | 0        | 0        | 0        | 0        | 0        | 0        | 0        | 0        | 0         | 0        | #N/A     | #N/A     | #N/A      | #N/A     | #N/A      | #N/A     |
| ATSG03950 | ATSG03950 | 0        | 0        | 0        | 0        | 0        | 0        | 0        | 0        | 0        | 0        | 0         | 0        | 0        | NA       | 0         | NA       | 0         | NA       |
| ATSG03960 | IQD12     | 24.96698 | 10.70548 | 12.87654 | 11.13522 | 15.89921 | 12.95893 | 7.114428 | 7.55223  | 6.833722 | 8.635821 | 18.62468  | 18.64632 | -0.27297 | 0.611469 | -0.98912  | 0.052308 | -0.11322  | NA       |
| ATSG03970 | ATSG03970 | 91.5456  | 98.13353 | 99.14938 | 116.3012 | 121.2315 | 120.6177 | 103.1592 | 84.15342 | 111.292  | 87.31774 | 90.46271  | 81.83662 | 0.30397  | 0.144464 | 0.053068  | 0.851447 | -0.14963  | 0.72091  |
| ATSG03980 | ATSG03980 | 0        | 0        | 0        | 0        | 0        | 0        | 0.889303 | 0        | 0        | 0        | 0         | 0        | 0        | NA       | 0         | NA       | 0         | NA       |
| ATSG03990 | ATSG03990 | 79.65566 | 80.29107 | 81.12222 | 96.09283 | 112.6194 | 115.6335 | 92.48756 | 88.46897 | 123.007  | 80.60099 | 90.46271  | 69.40574 | 0.405236 | 0.079164 | 0.323919  | 0.205238 | -0.01065  | 0.987718 |
| ATSG03995 | ATSG03995 | 13.07794 | 7.136984 | 5.150617 | 9.897974 | 9.562205 | 5.981045 | 9.782338 | 2.15778  | 7.809968 | 16.31211 | 19.95501  | 23.82585 | -0.16847 | 0.795364 | -0.28108  | 0.676343 | 0.105494  | NA       |
| ATSG04000 | ATSG04000 | 3.566712 | 1.784246 | 1.287654 | 2.062078 | 0.662467 | 0        | 0        | 1.07889  | 3.904984 | 0.959536 | 1.330334  | 4.143626 | -0.46036 | 0.527884 | -0.18789  | 0.824707 | -0.01706  | NA       |
| ATSG04010 | NSFBX     | 0        | 1.784246 | 2.575309 | 0        | 0        | 0.996841 | 0        | 2.15778  | 0.976246 | 0        | 0         | 0        | -0.53744 | NA       | -0.12597  | NA       | -0.65296  | NA       |
| ATSG04020 | ATSG04020 | 482.695  | 388.9656 | 327.0642 | 260.6466 | 305.3974 | 361.8532 | 347.7177 | 411.0571 | 372.926  | 282.1035 | 409.7429  | 344.9569 | -0.36749 | 0.082351 | -0.08312  | 0.759778 | -0.20907  | 0.575003 |
| ATSG04030 | ATSG04030 | 1.188904 | 0        | 0        | 0        | 0        | 0        | 0        | 0        | 0        | 0        | 0         | 0        | -0.2184  | NA       | -0.20558  | NA       | -0.19918  | NA       |
| ATSG04040 | SDP1      | 668.164  | 570.9587 | 563.9926 | 410.3535 | 400.1302 | 444.591  | 539.8072 | 497.3683 | 426.6195 | 474.9701 | 553.4189  | 493.0915 | -0.52052 | 0.000197 | -0.29837  | 0.053251 | -0.24638  | 0.283545 |
| ATSG04045 | ATSG04045 | 0        | 0        | 0        | 0        | 0        | 0        | 0        | 0        | 0        | 0        | 0         | 0        | #N/A     | #N/A     | #N/A      | #N/A     | #N/A      | #N/A     |
| ATSG04047 | ATSG04047 | 0        | 0        | 0        | 0        | 0        | 0        | 0        | 0        | 0        | 0        | 0         | 0        | #N/A     | #N/A     | #N/A      | #N/A     | #N/A      | #N/A     |
| ATSG04050 | ATSG04050 | 64.20081 | 55.31163 | 55.36914 | 36.70499 | 31.13596 | 35.88627 | 42.68657 | 37.76115 | 27.34389 | 52.77446 | 54.54369  | 52.83123 | -0.72112 | 0.006904 | -0.66517  | 0.021337 | -0.12696  | 0.834254 |
| ATSG04060 | ATSG04060 | 279.3924 | 324.7328 | 293.5852 | 164.5538 | 182.1785 | 234.2576 | 192.0896 | 224.4091 | 129.8407 | 314.7277 | 308.6375  | 251.7253 | -0.6154  | 0.004205 | -0.6929   | 0.001576 | -0.03333  | 0.953945 |
| ATSG04070 | ATSG04070 | 73.71204 | 78.50683 | 97.86173 | 107.228  | 98.04516 | 83.73463 | 107.6057 | 79.83786 | 71.26596 | 90.19635 | 91.79304  | 85.98024 | 0.212018 | 0.422377 | 0.049704  | 0.882221 | 0.092517  | 0.866179 |
| ATSG04080 | ATSG04080 | 34.47821 | 30.33218 | 43.78025 | 46.19054 | 58.95959 | 37.87995 | 79.14801 | 33.44559 | 98.60085 | 45.09817 | 45.23135  | 65.26211 | 0.353082 | 0.390094 | 0.869496  | 0.020585 | 0.460565  | 0.47064  |
| ATSG04090 | ATSG04090 | 239.9697 | 287.2636 | 310.3247 | 344.7794 | 307.3848 | 346.9006 | 416.194  | 387.3215 | 283.1113 | 292.6584 | 251.4331  | 303.5206 | 0.252389 | 0.206531 | 0.371719  | 0.060775 | 0.023457  | 0.963009 |
| ATSG04110 | GYR83     | 210.436  | 171.2876 | 169.9704 | 136.0971 | 176.8788 | 125.6019 | 164.5211 | 172.6224 | 160.1043 | 215.8954 | 212.8534  | 234.1149 | -0.32375 | 0.092672 | -0.15286  | 0.504301 | -0.254816 | 0.41539  |
| ATSG04120 | IPSP      | 0        | 0        | 0        | 0        | 0        | 0        | 0        | 1.07889  | 0        | 0        | 0         | 0        | 0        | NA       | 0         | NA       | 0.184979  | NA       |
| ATSG04130 | GYR8M     | 386.3938 | 303.3218 | 346.379  | 262.2963 | 237.1633 | 252.2007 | 289.0236 | 291.3003 | 234.299  | 278.2653 | 280.7005  | 355.3159 | -0.45893 | 0.06273  | -0.34623  | 0.056417 | -0.18117  | 0.558342 |
| ATSG04140 | GLU1      | 12440.69 | 10220.16 | 8248.714 | 2718.231 | 2536.587 | 3189.89  | 5139.285 | 6612.516 | 4565.903 | 9543.541 | 8995.718  | 9184.347 | -1.83099 | 1.36E-27 | -0.90159  | 2.79E-07 | -0.15354  | 0.664564 |
| ATSG04150 | BHLH101   | 3.566712 | 5.352738 | 3.862963 | 0.824831 | 0.662467 | 0        | 1.778607 | 0        | 0.976246 | 5.75214  | 2.660668  | 3.10772  | -1.36945 | 0.033811 | -1.0549   | 0.126115 | -0.02951  | NA       |
| ATSG04160 | ATSG04160 | 168.8244 | 140.9554 | 133.9161 | 113.4143 | 110.632  | 75.7599  | 93.1592  | 97.10009 | 101.5296 | 141.0517 | 200.8804  | 134.6678 | -0.33919 | 0.019793 | -0.53945  | 0.020584 | 0.08836   | 0.865138 |
| ATSG04170 | CML50     | 370.938  | 315.8115 | 291.0099 | 391.3824 | 447.8279 | 368.8311 | 417.0833 | 428.3193 | 495.933  | 311.8491 | 307.3071  | 264.1562 | 0.299188 | 0.071435 | 0.449556  | 0.006312 | -0.14759  | 0.633452 |
| ATSG04180 | ACA5      | 1.188904 | 3.568492 | 0        | 1.237247 | 0.662467 | 1.993682 | 0.889303 | 1.07889  | 0.976246 | 2.878607 | 5.321336  | 1.035907 | -0.10972 | 0.896294 | -0.21645  | 0.979729 | -0.523828 | NA       |
| ATSG04190 | PKS4      | 89.1678  | 105.2705 | 96.57408 | 30.93117 | 33.78583 | 39.87363 | 35.57214 | 37.76115 | 24.40615 | 63.32935 | 59.86503  | 75.62118 | -1.43417 | 8.35E-10 | -1.49795  | 1.67E-09 | -0.51834  | 0.153001 |
| ATSG04200 | AMC9      | 11.88904 | 9.162671 | 34.76667 | 40.39174 | 31.8989  | 30.23632 | 18.34113 | 32.21612 | 36.46235 | 35.91902 | 21.575404 | 0.582867 | 0.152874 | 0.255564 | 0.607129  | 0.443431 | 0.528497  | NA       |
| ATSG04210 | ATSG04210 | 2.377808 | 1.784246 | 2.575309 | 0.824831 | 1.987402 | 0.996841 | 1.778607 | 1.07889  | 5.952492 | 0        | 1.330334  | 1.035907 | -0.39184 | 0.601628 | -0.22057  | 0.975061 | -0.62044  | NA       |
| ATSG04220 | SVT3      | 204.4915 | 281.9109 | 224.0519 | 75.88247 | 321.9591 | 303.0396 | 399.2973 | 411.0571 | 275.3014 | 312.8086 | 276.7095  | 234.1149 | -0.34934 | 0.108161 | 0.602961  | 0.003348 | 0.215513  | 0.565795 |
| ATSG04230 | PAL3      | 161.6909 | 167.7191 | 172.5457 | 78.79449 | 82.80841 | 83.73463 | 57.80473 | 78.07431 | 82.78011 | 132.7801 | 150.3277  | 113.9497 | -1.02943 | 4.28E-08 | -1.16482  | 3.08E-09 | -0.36882  | 0.228165 |
| ATSG04235 | ATSG04235 | 146.2352 | 137.3869 | 115.8889 | 89.9066  | 91.42048 | 122.6114 | 110.2736 | 106.8101 | 73.21845 | 113.2252 | 95.78405  | 95.3034  | -0.39626 | 0.092111 | -0.44389  | 0.072293 | -0.37496  | 0.309787 |
| ATSG04238 | ATSG04238 | 2.377808 | 1.784246 | 1.287654 | 0        | 0        | 0        | 0.889303 | 2.15778  | 0        | 0.959536 | 0         | 0        | -0.99535 | NA       | -0.30517  | NA       | -0.65748  | NA       |
| ATSG04240 | ELF6      | 400.6606 | 305.1061 | 251.0926 | 200.0216 | 217.9517 | 238.2449 | 252.5622 | 285.9058 | 211.8454 | 248.5197 | 282.0308  | 264.1562 | -0.53862 | 0.005829 | -0.34605  | 0.107942 | -0.26589  | 0.430031 |
| ATSG04250 | ATSG04250 | 24.96698 | 26.76369 | 20.60247 | 68.8734  | 58.29712 | 76.57674 |          |          |          |          |           |          |          |          |           |          |           |          |

|           |           |           |          |          |          |          |          |          |          |          |          |          |          |          |           |          |          |          |          |
|-----------|-----------|-----------|----------|----------|----------|----------|----------|----------|----------|----------|----------|----------|----------|----------|-----------|----------|----------|----------|----------|
| ATSG04760 | ATSG04760 | 43.98945  | 87.42806 | 63.09506 | 135.2723 | 123.2189 | 116.6304 | 130.7276 | 176.938  | 225.5128 | 73.88424 | 71.83803 | 75.62118 | 0.931927 | 0.000294  | 1.41369  | 1.48E-08 | 0.20083  | 0.716262 |
| ATSG04770 | CAT6      | 22.58917  | 19.62671 | 33.47901 | 21.85803 | 19.87402 | 22.92734 | 37.35075 | 35.60337 | 33.19236 | 32.62421 | 27.93701 | 17.61041 | -0.23258 | 0.5973975 | 0.436835 | 0.270233 | 0.026052 | 0.980159 |
| ATSG04780 | PCMP-H16  | 28.53629  | 32.11643 | 38.62963 | 32.58083 | 38.4231  | 35.88627 | 42.68657 | 48.55005 | 42.95482 | 33.58375 | 33.25835 | 33.14901 | 0.090616 | 0.8104    | 0.408409 | 0.224123 | 0.009301 | 0.919594 |
| ATSG04781 | ATSG04781 | 11.88904  | 10.70548 | 16.73951 | 35.05532 | 21.86142 | 21.9305  | 25.7898  | 34.52448 | 18.54867 | 23.98839 | 10.64267 | 20.71813 | 0.878912 | 0.039492  | 0.844102 | 0.062753 | 0.420096 | 0.602399 |
| ATSG04790 | ATSG04790 | 5.94452   | 3.568492 | 7.725926 | 9.073143 | 9.937009 | 2.990522 | 5.335821 | 3.23667  | 1.952492 | 7.676285 | 13.30334 | 8.287527 | 0.28921  | 0.688122  | -0.49675 | 0.477619 | 0.534777 | NA       |
| ATSG04800 | RPS17D    | 555.2181  | 547.7635 | 667.0040 | 590.1667 | 655.8426 | 483.4678 | 452.9764 | 438.0293 | 658.966  | 629.4554 | 699.7557 | 539.7073 | -0.0138  | 0.9690224 | -0.21191 | 0.381007 | 0.074384 | 0.874886 |
| ATSG04810 | PPR4      | 901.1892  | 899.26   | 928.3988 | 522.5305 | 458.4274 | 543.2782 | 879.5211 | 994.7365 | 755.6144 | 961.4547 | 929.9034 | 1008.973 | -0.83176 | 6.04E-11  | -0.05352 | 0.769244 | 0.087288 | 0.754476 |
| ATSG04820 | OP13      | 49.93397  | 78.50683 | 61.80741 | 65.16166 | 64.92179 | 59.81045 | 51.5796  | 49.62894 | 86.88589 | 68.12703 | 55.87403 | 68.36983 | 0.020528 | 0.956657  | 0.003803 | 0.929445 | 0.040084 | 0.957855 |
| ATSG04830 | ATSG04830 | 417.3053  | 460.3355 | 446.8161 | 848.3388 | 879.0941 | 752.6148 | 769.2475 | 627.9139 | 963.5548 | 516.2302 | 564.0616 | 518.9892 | 0.89133  | 1.77E-08  | 0.820591 | 3.32E-07 | 0.266977 | 0.331885 |
| ATSG04840 | ATSG04840 | 17.83356  | 21.41095 | 27.04074 | 22.27044 | 15.89921 | 19.93682 | 23.12189 | 16.18335 | 19.52492 | 21.10978 | 26.60668 | 21.75404 | -0.16063 | 0.726457  | -0.14554 | 0.775265 | 0.053755 | 0.957775 |
| ATSG04850 | VPS60.2   | 214.0027  | 351.4965 | 377.2827 | 391.7948 | 410.0672 | 396.7426 | 411.7475 | 427.2404 | 436.382  | 361.7449 | 348.5475 | 323.2028 | 0.344073 | 0.081498  | 0.431557 | 0.030333 | 0.135219 | 0.725981 |
| ATSG04853 | ATSG04853 | 0         | 0        | 0        | 0        | 0        | 0        | 0        | 0        | 0        | 0        | 0        | 0        | #N/A     | #N/A      | #N/A     | #N/A     | #N/A     | #N/A     |
| ATSG04860 | ATSG04860 | 87.97889  | 85.64381 | 91.42346 | 155.0683 | 118.5816 | 151.5198 | 96.93408 | 92.78453 | 74.1947  | 80.60099 | 98.44471 | 90.12387 | 0.662377 | 0.001539  | -0.00831 | 0.979308 | 0.012336 | 0.985341 |
| ATSG04870 | CPK1      | 429.1943  | 380.0444 | 441.6654 | 397.1562 | 378.9313 | 484.4646 | 397.5187 | 427.2404 | 355.3535 | 339.6756 | 341.8958 | 360.4955 | 0.001333 | 0.995901  | -0.08726 | 0.653286 | -0.26304 | 0.274581 |
| ATSG04880 | ATSG04880 | 83.2328   | 98.13353 | 106.8753 | 122.8998 | 137.1307 | 136.5672 | 151.1816 | 138.0979 | 131.7932 | 66.20796 | 81.15037 | 75.62118 | 0.448198 | 0.024364  | 0.539509 | 0.008096 | -0.36251 | 0.284756 |
| ATSG04885 | ATSG04885 | 227.0807  | 187.3458 | 208.6    | 275.4936 | 323.9465 | 283.1028 | 297.0274 | 344.1659 | 291.8976 | 231.2481 | 182.2558 | 188.35   | 0.485875 | 0.003392  | 0.563776 | 0.000785 | -0.05046 | 0.903465 |
| ATSG04890 | RTM2      | 45.17835  | 23.1952  | 51.50617 | 17.73387 | 24.51129 | 20.93366 | 20.45398 | 24.81447 | 40.02609 | 41.26003 | 37.24935 | 52.83123 | -0.88208 | 0.013073  | -0.47677 | 0.238547 | 0.102826 | 0.900456 |
| ATSG04895 | ATSG04895 | 11.00568  | 51.74313 | 57.94445 | 77.99445 | 67.99756 | 63.59686 | 83.73463 | 84.48383 | 89.54786 | 42.95482 | 62.36982 | 58.53469 | 0.039212 | 0.925953  | 0.02231  | 0.960593 | -0.2435  | 0.695407 |
| ATSG04900 | NOL       | 212.8138  | 205.1883 | 280.7086 | 207.445  | 192.1155 | 199.3682 | 259.6762 | 229.8036 | 196.2254 | 371.3403 | 299.3251 | 311.8079 | -0.22114 | 0.271933  | -0.02995 | 0.90839  | 0.47994  | 0.050531 |
| ATSG04910 | ATSG04910 | 156.9353  | 201.6198 | 186.7099 | 242.0879 | 268.2992 | 250.207  | 191.2002 | 220.0935 | 245.0337 | 196.7048 | 184.9164 | 156.4219 | 0.478481 | 0.060687  | 0.268686 | 0.17911  | -0.01086 | 0.983814 |
| ATSG04920 | VPS36     | 477.9394  | 437.1403 | 485.4457 | 535.3154 | 502.8127 | 527.3288 | 501.5672 | 529.735  | 584.7714 | 452.9008 | 323.2712 | 431.973  | 0.156213 | 0.356838  | 0.200845 | 0.245628 | -0.20666 | 0.318574 |
| ATSG04930 | AL1       | 813.2103  | 656.6025 | 521.5    | 818.6449 | 803.5728 | 982.885  | 900.8664 | 1043.287 | 634.5599 | 411.6408 | 429.6979 | 389.5009 | 0.374895 | 0.086936  | 0.361349 | 0.115222 | -0.6746  | 0.011024 |
| ATSG04940 | SUVH1     | 181.9023  | 176.6404 | 169.9704 | 112.177  | 108.6446 | 141.5514 | 122.7239 | 128.3879 | 122.0307 | 120.9015 | 130.3727 | 142.9551 | -0.54946 | 0.001758  | -0.49247 | 0.00854  | -0.4148  | 0.116897 |
| ATSG04950 | NAS1      | 165.2576  | 94.56504 | 117.1765 | 94.03075 | 88.10815 | 86.72515 | 84.48383 | 92.78453 | 54.66978 | 140.0922 | 102.4357 | 142.9551 | -0.47684 | 0.072065  | -0.68376 | 0.010813 | 0.024297 | 0.972822 |
| ATSG04960 | PME46     | 0         | 1.784246 | 0        | 0        | 0        | 0        | 0        | 0        | 0        | 0        | 1.330334 | 0        | -0.27254 | NA        | -0.25305 | NA       | -0.03925 | NA       |
| ATSG04970 | PME47     | 1.188904  | 0        | 1.287654 | 0        | 0.662467 | 0        | 0.889303 | 0        | 0.976246 | 1.919071 | 1.330334 | 1.035907 | -0.44784 | NA        | -0.1238  | NA       | 0.264123 | NA       |
| ATSG04980 | ATSG04980 | 54.68958  | 64.23286 | 59.2321  | 62.68717 | 79.49607 | 70.7757  | 66.69776 | 72.28563 | 47.83605 | 72.92471 | 55.87403 | 64.2262  | 0.248072 | 0.381852  | 0.07081  | 0.844351 | 0.126618 | 0.827753 |
| ATSG04990 | SUN1      | 282.9591  | 297.9691 | 244.6543 | 230.1279 | 213.9769 | 242.2323 | 226.7724 | 263.2491 | 254.8002 | 239.8839 | 210.1928 | 225.8276 | -0.26092 | 0.101313  | -0.14382 | 0.437046 | -0.27613 | 0.257797 |
| ATSG05000 | TOC34     | 192.6024  | 196.2671 | 163.5321 | 224.7665 | 245.1129 | 160.4914 | 180.5286 | 180.1746 | 247.9665 | 160.2424 | 158.3097 | 210.8279 | 0.194576 | 0.44269   | 0.137721 | 0.627119 | -0.05683 | 0.918298 |
| ATSG05010 | ATSG05010 | 1411.2219 | 1393.496 | 1390.667 | 1238.484 | 1118.907 | 1414.517 | 1221.903 | 1403.636 | 882.5264 | 1449.858 | 1225.238 | 1253.447 | -0.15144 | 0.456647  | -0.25337 | 0.201398 | -0.0924  | 0.806773 |
| ATSG05020 | ATSG05020 | 0         | 0        | 0        | 0        | 0        | 0        | 0        | 0        | 0        | 0.959536 | 1.330334 | 1.035907 | 0        | NA        | 0        | NA       | 0.604134 | NA       |
| ATSG05025 | ATSG05025 | 0         | 0        | 0        | 0        | 0        | 0        | 0        | 0        | 0        | 0        | 0        | 0        | #N/A     | #N/A      | #N/A     | #N/A     | #N/A     | #N/A     |
| ATSG05030 | ATSG05030 | 0         | 0        | 0        | 0        | 0        | 0        | 0.889303 | 0        | 0.976246 | 0        | 0        | 0        | 0.309898 | NA        | 0        | NA       | 0        | NA       |
| ATSG05040 | ATSG05040 | 5.94452   | 14.27397 | 10.30123 | 15.25938 | 16.56168 | 30.90206 | 5.335821 | 10.7889  | 14.64369 | 7.676285 | 14.63367 | 7.251346 | 0.879266 | 0.080402  | 0.027545 | 0.969451 | -0.03358 | 0.943884 |
| ATSG05050 | ATSG05050 | 0         | 0        | 0        | 0        | 0        | 0        | 0        | 0        | 0.959536 | 1.330334 | 0        | 0        | 0        | NA        | 0        | NA       | 0.366448 | NA       |
| ATSG05060 | ATSG05060 | 150.9908  | 210.541  | 190.5728 | 383.5465 | 361.7071 | 365.8406 | 242.7799 | 222.2513 | 301.66   | 170.7973 | 159.6401 | 135.7038 | 0.999649 | 5.09E-09  | 0.473591 | 0.013674 | -0.22848 | 0.503812 |
| ATSG05070 | PAT03     | 0         | 0        | 0.95887  | 0        | 0        | 0        | 0.889303 | 0        | 0        | 0        | 0        | 0        | 0        | NA        | 0        | NA       | 0        | NA       |
| ATSG05080 | UBC22     | 533.8179  | 570.9587 | 554.979  | 531.1913 | 525.3365 | 493.4362 | 453.5448 | 497.3683 | 533.0303 | 603.5479 | 538.7853 | 538.6714 | -0.09352 | 0.516706  | -0.15905 | 0.266972 | 0.02166  | 0.947744 |
| ATSG05090 | ATSG05090 | 155.7464  | 151.6609 | 117.1765 | 89.08176 | 96.05775 | 92.70619 | 67.58786 | 78.75897 | 77.12343 | 117.0633 | 107.7571 | 74.58527 | -0.89522 | 0.000047  | -0.89522 | 0.000047 | -0.48661 | 0.132158 |
| ATSG05100 | ATSG05100 | 404.2273  | 476.3937 | 437.8025 | 607.0757 | 480.2888 | 552.2498 | 483.7811 | 529.735  | 418.8095 | 382.8547 | 280.7005 | 353.2441 | 0.313609 | 0.073202  | 0.119801 | 0.517211 | -0.35979 | 0.1573   |
| ATSG05110 | CYS7      | 243.7253  | 258.7157 | 263.9691 | 413.2404 | 352.4326 | 385.7774 | 416.194  | 428.3193 | 405.1421 | 313.7682 | 309.9678 | 258.9766 | 0.6967   | 6.02E-07  | 0.582809 | 2.87E-05 | 0.200504 | 0.43392  |
| ATSG05113 | ATSG05113 | 0         | 0        | 0        | 0        | 0        | 0        | 0        | 0        | 0        | 0        | 0        | 0        | #N/A     | #N/A      | #N/A     | #N/A     | #N/A     | #N/A     |
| ATSG05120 | ATSG05120 | 0         | 0        | 0        | 0        | 0        | 0        | 0        | 0        | 0        | 0        | 0        | 0        | #N/A     | #N/A      | #N/A     | #N/A     | #N/A     | #N/A     |
| ATSG05130 | ATSG05130 | 46.36725  | 26.76369 | 48.93086 | 23.50769 | 19.87402 | 31.8989  | 14.22886 | 44.23449 | 33.19236 | 38.38143 | 18.62468 | 37.29264 | -0.65229 | 0.118058  | -0.39465 | 0.405773 | -0.33098 | 0.667773 |
| ATSG05140 | MED26B    | 174.7689  | 221.2465 | 145.5049 | 216.9306 | 211.3271 | 249.2102 | 317.4813 | 319.3514 | 273.3489 | 175.595  | 228.8174 | 228.9353 | 0.321932 | 0.11021   | 0.743521 | 6.72E-05 | 0.227853 | 0.511052 |
| ATSG05150 | ATG18E    | 1.188904  | 0        | 0        | 0.412416 | 0        | 0        | 0        | 0        | 0        | 0        | 0        | 0        | -0.19056 | NA        | -0.19067 | NA       | -0.18704 | NA       |
| ATSG05160 | ATSG05160 | 101.0568  | 73.15409 | 108.163  | 42.89122 | 39.08557 | 44.85784 | 54.24751 | 67.97007 | 37.09735 | 92.11542 | 103.766  | 80.80071 | -1.12012 | 6.06E-06  | -0.80665 | 0.00223  | -0.04486 | 0.946708 |
| ATSG05170 | CESA3     | 5208.588  | 4176.92  | 3698.143 | 1542.022 | 1327.584 | 2091.372 | 1772.382 | 2137.281 | 1388.222 | 3513.819 | 3305.88  | 3329.404 | -1.36115 | 1.75E-12  | -1.26805 | 6.67E-11 | -0.35637 | 0.274581 |
| ATSG05180 | ATSG05180 | 224.7028  | 158.7979 | 212.463  | 113.0019 | 130.5061 | 142.5482 | 111.1629 | 108.9679 | 110.3158 | 213.9764 | 235.4691 | 202.0018 | -0.63801 | 0.003064  | -0.84237 | 4.63E-06 | 0.111235 | 0.770459 |
| ATSG05190 | Y-1       | 89.1678   | 98.13353 | 88.84815 | 148.882  | 127.1937 | 166.474  | 111.1629 | 131.6246 | 121.0545 | 70.0461  | 67.84703 | 60.08258 | 0.664266 | 0.000758  | 0.390022 | 0.082552 | -0.4586  | 0.166225 |
| ATSG05200 | ATSG05200 | 2167.372  | 2731.681 | 2512.214 | 1858.345 | 1874.782 | 2194.047 | 3209.496 | 3261.484 | 2048.164 | 3338.224 | 3508.091 | 2687.142 | -0.31447 | 0.128131  | 0.196574 | 0.395576 | 0.354755 | 0.237124 |
| ATSG05210 | ATSG05210 | 368.5602  | 347.928  | 355.3926 | 339.0056 | 343.158  | 307.027  | 305.204  | 336.6137 | 480.313  | 248.5197 | 287.3521 | 338.7414 | -0.1119  | 0.63116   | 0.064295 | 0.80873  | -0.28757 | 0.372517 |
| ATSG05220 | ATSG05220 | 0         | 0        | 0        | 3.71     |          |          |          |          |          |          |          |          |          |           |          |          |          |          |

|            |            |          |          |          |          |          |          |          |          |          |          |          |          |          |          |           |          |          |          |
|------------|------------|----------|----------|----------|----------|----------|----------|----------|----------|----------|----------|----------|----------|----------|----------|-----------|----------|----------|----------|
| ATS050700  | ATE1       | 361.4268 | 367.5547 | 363.1185 | 302.3006 | 263.662  | 320.9827 | 349.4963 | 309.6414 | 306.5412 | 338.7161 | 435.0192 | 363.6032 | -0.29795 | 0.058081 | -0.17301  | 0.335736 | 0.05345  | 0.879935 |
| ATS050710  | ATS050710  | 57.06739 | 51.74313 | 60.51975 | 58.1506  | 58.95959 | 37.87995 | 33.79533 | 39.91893 | 72.2422  | 55.65307 | 58.53469 | 52.83123 | -0.10557 | 0.785895 | -0.20677  | 0.597311 | -0.02506 | 0.977475 |
| ATS050720  | ATS050720  | 0        | 0        | 0        | 0.412416 | 1.324935 | 0        | 1.778607 | 1.07889  | 0.972646 | 0        | 0        | 0        | 0.339566 | NA       | 0.668776  | NA       | 0        | NA       |
| ATS050730  | ASA1       | 458.9169 | 390.7499 | 387.584  | 818.6449 | 807.5476 | 888.1851 | 1123.19  | 1212.672 | 1062.156 | 334.8779 | 389.7879 | 347.0287 | 1.006151 | 9.71E-17 | 1.437717  | 1.92E-33 | -0.21244 | 0.343109 |
| ATS050740  | EGY2       | 759.7096 | 777.9313 | 830.5371 | 543.5637 | 504.1376 | 554.2435 | 763.9117 | 836.1397 | 686.3009 | 973.9287 | 901.9664 | 926.1004 | -0.55976 | 1.23E-06 | -0.05117  | 0.751531 | 0.24119  | 0.182992 |
| ATS050750  | ATS050750  | 324.5708 | 321.1643 | 383.721  | 351.7905 | 374.294  | 362.85   | 412.638  | 434.7926 | 333.8761 | 274.4272 | 258.0848 | 302.4847 | 0.076774 | 0.686358 | -0.192732 | 0.280889 | -0.29716 | 0.223515 |
| ATS050760  | VP31       | 49.93397 | 57.09587 | 83.69753 | 101.8666 | 84.79581 | 110.6493 | 88.04104 | 92.78453 | 57.59851 | 64.28889 | 45.23135 | 62.15439 | 0.604284 | 0.028949 | 0.300806  | 0.357876 | -0.13676 | 0.831384 |
| ATS050770  | WOX7       | 0        | 0        | 0        | 0        | 0        | 0.996841 | 0        | 0        | 0        | 0        | 0        | 0        | 0.15625  | NA       | 0         | NA       | 0        | NA       |
| ATS050780  | RPN8A      | 577.8073 | 635.1916 | 606.4852 | 690.7961 | 597.5455 | 658.9118 | 556.704  | 616.0462 | 602.3438 | 572.8428 | 548.0976 | 557.3177 | 0.100879 | 0.461778 | -0.03375  | 0.839337 | -0.11218 | 0.621889 |
| ATS050790  | ATS050790  | 36.85602 | 42.8219  | 37.34198 | 25.98218 | 23.18635 | 22.92734 | 22.23259 | 19.42002 | 20.50117 | 29.7456  | 45.23135 | 49.72351 | -0.63166 | 0.052018 | -0.83     | 0.016307 | 0.089114 | 0.905632 |
| ATS050795  | ATS050795  | 0        | 0        | 0        | 0        | 0        | 0        | 0        | 0        | 0        | 0        | 0        | 0        | #N/A     | #N/A     | #N/A      | #N/A     | #N/A     | #N/A     |
| ATS050800  | LIMYB      | 331.7042 | 415.7293 | 357.9679 | 310.9613 | 351.1077 | 339.9227 | 337.9353 | 339.8503 | 318.2562 | 381.8952 | 371.1632 | 385.3572 | -0.13561 | 0.379979 | -0.14057  | 0.395368 | 0.050777 | 0.874847 |
| ATS050810  | ATL43      | 15.45575 | 8.92123  | 9.01358  | 11.54764 | 9.274542 | 9.968408 | 10.67164 | 16.18335 | 8.786214 | 14.39303 | 6.65167  | 13.46678 | -0.11142 | 0.855280 | 0.047136  | 0.944443 | 0.043578 | NA       |
| ATS050820  | ATS050820  | 172.3911 | 126.6815 | 141.642  | 79.59621 | 106.6572 | 104.6683 | 72.92289 | 97.10009 | 87.86214 | 106.5085 | 118.3997 | 107.7343 | -0.60516 | 0.004002 | -0.76325  | 0.000427 | -0.40636 | 0.220081 |
| ATS050830  | ATS050830  | 123.646  | 151.6609 | 182.8469 | 117.126  | 119.9066 | 109.6525 | 98.71269 | 108.9679 | 130.817  | 176.5546 | 191.5681 | 161.6014 | -0.38637 | 0.060957 | -0.42403  | 0.051183 | 0.20430  | 0.576668 |
| ATS050840  | ATS050840  | 24.96698 | 37.46917 | 48.93086 | 10.31039 | 14.57428 | 4.984204 | 13.33955 | 16.18335 | 11.71495 | 21.10978 | 33.25835 | 36.25737 | -1.63115 | 2.24E-05 | -1.26829  | 0.001828 | -0.26903 | 0.729971 |
| ATS050850  | PIRL1      | 86.78999 | 94.56504 | 75.97161 | 66.39891 | 58.95959 | 61.80413 | 80.03731 | 77.68008 | 64.43224 | 59.49121 | 74.4987  | 47.6517  | -0.4303  | 0.076101 | -0.19612  | 0.496833 | -0.48915 | 0.181771 |
| ATS050860  | UGT76C2    | 185.469  | 174.8561 | 166.1074 | 56.91335 | 79.49607 | 60.80729 | 102.2699 | 97.10009 | 108.3633 | 139.1327 | 127.7121 | 161.6014 | -1.38542 | 9.09E-14 | -0.75488  | 0.000113 | -0.28648 | 0.376638 |
| ATS050870  | UGT76C1    | 146.2352 | 155.2294 | 155.8062 | 89.08176 | 95.39529 | 83.73463 | 87.15174 | 118.6779 | 93.71962 | 151.6066 | 134.3637 | 126.3806 | -0.7454  | 5.25E-05 | -0.59946  | 0.002344 | -0.14102 | 0.712278 |
| ATS050880  | UGT76C4    | 5.94452  | 3.568492 | 1.287654 | 4.124156 | 1.987402 | 0.996841 | 2.66791  | 5.39445  | 3.904984 | 3.881143 | 7.982004 | 4.143626 | -0.3194  | 0.669558 | 0.072089  | 0.934227 | 0.337172 | NA       |
| ATS050890  | UGT76C5    | 98.67903 | 110.6233 | 122.3272 | 23.09527 | 31.13596 | 32.89575 | 60.47264 | 51.78672 | 72.2422  | 139.1327 | 167.6221 | 128.4524 | -1.88076 | 1.7E-16  | -0.81061  | 0.000581 | 0.379536 | 0.28555  |
| ATS050900  | UGT76C3    | 0        | 0        | 0        | 0        | 0        | 0        | 0        | 0.976246 | 0        | 0        | 0        | 0        | 0.16673  | NA       | 0         | NA       | 0        | NA       |
| ATS050910  | ATS050910  | 0        | 0        | 0        | 0        | 0        | 0        | 0.889303 | 0        | 0        | 0        | 0        | 0        | 0        | NA       | 0.160764  | NA       | 0        | NA       |
| ATS050920  | DHS        | 83.22328 | 90.99655 | 75.97161 | 94.03075 | 88.10815 | 83.73463 | 80.03731 | 96.0212  | 83.95713 | 64.28889 | 87.80204 | 103.5907 | 0.098005 | 0.732046 | 0.056909  | 0.861199 | 0.031666 | 0.96026  |
| ATS050930  | GC1        | 316.2484 | 376.4759 | 345.0914 | 304.7751 | 357.0699 | 280.1123 | 307.9366 | 325.8248 | 350.4723 | 383.8143 | 368.5025 | 347.0287 | -0.12964 | 0.452801 | 0.019136  | 0.929433 | 0.087227 | 0.784151 |
| ATS050940  | ROPGEF5    | 43.98945 | 57.09587 | 45.0679  | 54.43886 | 47.69764 | 42.86415 | 65.80846 | 62.57562 | 33.19236 | 71.96517 | 91.79304 | 56.97486 | 0.011536 | 0.977989 | 0.147427  | 0.715626 | 0.563145 | 0.227602 |
| ATS050945  | ATS050945  | 0        | 0        | 0        | 0        | 0        | 0        | 0        | 0        | 0        | 0        | 0        | 0        | #N/A     | #N/A     | #N/A      | #N/A     | #N/A     | #N/A     |
| ATS050950  | MEE60      | 89.1678  | 73.15409 | 109.4506 | 123.7247 | 113.2819 | 84.73147 | 112.9415 | 103.5734 | 143.5082 | 97.87263 | 71.83803 | 114.9856 | 0.235969 | 0.410144 | 0.379249  | 0.180938 | 0.061939 | 0.922577 |
| ATS050960  | ATS050960  | 64.20081 | 32.11643 | 57.94445 | 73.94223 | 35.11077 | 16.94629 | 31.12562 | 22.65669 | 37.09735 | 71.00564 | 59.86503 | 49.72351 | -0.69968 | 0.044975 | -0.71599  | 0.053708 | 0.193283 | 0.784887 |
| ATS050965  | ATS050965  | 0        | 0        | 0        | 3.299235 | 2.649869 | 3.987363 | 5.35821  | 1.07889  | 0        | 0.995366 | 2.660668 | 2.071813 | 1.201817 | 0.058282 | 0.854168  | 0.214669 | 0.732378 | NA       |
| ATS050970  | NEDD1      | 123.646  | 121.3287 | 133.9161 | 97.33008 | 92.08295 | 90.71251 | 91.59826 | 86.3112  | 74.1947  | 122.8206 | 117.0694 | 117.0574 | -0.42272 | 0.025943 | -0.57434  | 0.003693 | -0.0848  | 0.845159 |
| ATS050980  | FPG51      | 379.2604 | 381.8287 | 348.9543 | 318.7972 | 320.6342 | 394.7489 | 392.1828 | 409.9782 | 303.6125 | 388.6119 | 328.5925 | 355.3159 | -0.10546 | 0.594913 | -0.00492  | 0.983659 | -0.04526 | 0.911886 |
| ATS050985  | ATS050985  | 0        | 0        | 0        | 0        | 0        | 0        | 0        | 0        | 0        | 0        | 0        | 0        | #N/A     | #N/A     | #N/A      | #N/A     | #N/A     | #N/A     |
| ATS050987  | PRA1A2     | 39.23383 | 71.36984 | 65.67037 | 122.075  | 107.3197 | 98.68724 | 77.3694  | 102.0495 | 93.71962 | 47.97678 | 47.89202 | 53.86714 | 0.893818 | 0.000219 | 0.625329  | 0.01837  | -0.2005  | 0.709667 |
| ATS050990  | ATS050990  | 76.08985 | 99.91778 | 122.3272 | 94.03075 | 98.70762 | 93.70303 | 75.5908  | 73.36452 | 105.4346 | 100.7512 | 111.7481 | 94.26749 | -0.05248 | 0.861966 | -0.21727  | 0.445932 | 0.03882  | 0.950277 |
| ATS050600  | EIF3G2     | 26.15589 | 21.41095 | 19.31482 | 32.99325 | 28.48609 | 25.91786 | 15.11816 | 16.18335 | 35.14486 | 16.31211 | 26.60668 | 36.25673 | 0.3511   | 0.43853  | -0.01661  | 0.977405 | 0.203461 | 0.818128 |
| ATS050610  | ATS050610  | 0        | 0        | 0        | 0        | 0        | 0        | 0        | 0        | 0        | 0        | 0        | 0        | #N/A     | #N/A     | #N/A      | #N/A     | #N/A     | #N/A     |
| ATS050620  | ATS050620  | 0        | 0        | 0        | 0        | 0        | 0        | 0        | 0        | 0        | 0        | 0        | 0        | #N/A     | #N/A     | #N/A      | #N/A     | #N/A     | #N/A     |
| ATS050630  | ATS050630  | 0        | 0        | 0        | 0        | 0        | 0        | 0        | 0        | 0.976246 | 0        | 0        | 0        | 0        | NA       | 0.16673   | NA       | 0        | NA       |
| ATS050640  | ATS050640  | 0        | 0        | 0        | 0        | 0        | 0        | 0        | 0        | 0        | 0        | 0        | 0        | #N/A     | #N/A     | #N/A      | #N/A     | #N/A     | #N/A     |
| ATS050643  | ATS050643  | 0        | 0        | 0.412416 | 0.662467 | 0        | 0        | 0        | 0        | 0        | 0.959536 | 0        | 1.035907 | 0.223894 | NA       | 0         | NA       | 0        | 3.74818  |
| ATS050650  | ATS050650  | 162.8798 | 162.3664 | 148.0802 | 138.5716 | 133.8184 | 144.5419 | 125.3918 | 140.2557 | 125.9357 | 159.2829 | 151.6581 | 178.1759 | -0.18101 | 0.335717 | -0.26893  | 0.166611 | 0.051411 | 0.899711 |
| ATS050660  | ATS050660  | 533.8179 | 660.171  | 718.5111 | 688.734  | 770.4494 | 688.817  | 768.3582 | 735.8029 | 750.7332 | 833.8365 | 854.0744 | 649.5134 | 0.166586 | 0.343383 | 0.235634  | 0.181634 | 0.285514 | 0.241584 |
| ATS050670  | RBE        | 0        | 0        | 0        | 1.287654 | 2.062708 | 1.324935 | 1.993682 | 0        | 0.972646 | 0        | 0        | 0.135907 | 0.655053 | NA       | -0.0969   | NA       | -0.06765 | NA       |
| ATS050680  | LBD33      | 0        | 0        | 0        | 0        | 0        | 0        | 0        | 0        | 0        | 0        | 0        | 0        | #N/A     | #N/A     | #N/A      | #N/A     | #N/A     | #N/A     |
| ATS050690  | GPAT7      | 0        | 0        | 0        | 1.237247 | 0.662467 | 0        | 0.889303 | 1.07889  | 0.976246 | 0        | 0        | 1.035907 | 0.389318 | NA       | 0.50973   | NA       | 0.177355 | NA       |
| ATS050610  | MYB33      | 70.0133  | 148.0924 | 133.9161 | 167.0283 | 184.1659 | 151.5198 | 210.7649 | 175.891  | 155.2231 | 154.4852 | 176.9344 | 142.9551 | 0.150835 | 0.500746 | 0.254566  | 0.25072  | 0.060032 | 0.89704  |
| ATS0506110 | ATS0506110 | 826.2882 | 704.7772 | 807.3593 | 716.3659 | 577.8626 | 628.0097 | 759.4652 | 756.3018 | 856.1677 | 618.9005 | 674.4793 | 690.9497 | -0.15222 | 0.294192 | 0.0173    | 0.927005 | -0.23809 | 0.249625 |
| ATS0506120 | ATS0506120 | 461.2947 | 415.7293 | 386.2963 | 299.4137 | 274.2615 | 320.9827 | 395.74   | 392.7159 | 244.0615 | 380.9356 | 333.9138 | 385.3572 | -0.48833 | 0.011923 | -0.28477  | 0.190851 | -0.19363 | 0.589724 |
| ATS0506125 | ATS0506125 | 0        | 0        | 0        | 0        | 0        | 0        | 0        | 0        | 0        | 0        | 0        | 0        | #N/A     | #N/A     | #N/A      | #N/A     | #N/A     | #N/A     |
| ATS0506130 | ATS0506130 | 447.0279 | 467.4725 | 491.884  | 458.1937 | 519.3743 | 472.5025 | 575.3794 | 603.0995 | 555.484  | 533.5018 | 565.3919 | 512.7737 | 0.042994 | 0.783658 | 0.299089  | 0.019077 | 0.193334 | 0.33453  |
| ATS0506140 | SNX1       | 695.5088 | 735.1094 | 736.5383 | 710.1796 | 798.2731 | 786.5074 | 812.8234 | 790.8263 | 856.1677 | 844.9134 | 1004.402 | 711.6678 | 0.080609 | 0.646714 | 0.181042  | 0.277098 | 0.235523 | 0.310326 |
| ATS0506150 | CYCB1-2    | 187.8468 | 180.2088 | 216.3259 | 261.4715 | 273.599  | 332.9448 | 257.898  | 279.5425 | 243.0853 | 329.1207 | 372.4935 | 240.3303 | 0.546963 | 0.004901 | 0.402194  | 0.056523 | 0.664413 | 0.005677 |
| ATS0506160 | ATO        | 215.1916 | 217.678  | 220.1889 | 275.906  | 287.5108 | 288.087  | 208.097  | 267.5647 | 311.4225 | 236.0458 | 227.4871 | 196.8222 | 0.374174 | 0.037394 | 0.261668  | 0.1911   | 0.015147 | 0.976814 |
| ATS0506165 | ATS0506165 | 3.566712 | 3.568492 | 3.862963 | 8.660727 | 7.949607 | 6.977885 | 4.446517 | 3.2      |          |          |          |          |          |          |           |          |          |          |





|          |          |          |           |          |          |          |          |          |           |          |          |          |          |          |          |          |          |           |          |
|----------|----------|----------|-----------|----------|----------|----------|----------|----------|-----------|----------|----------|----------|----------|----------|----------|----------|----------|-----------|----------|
| ATS07570 | ATS07570 | 2.377808 | 3.568492  | 7.725926 | 1.237247 | 1.324935 | 0        | 2.66791  | 2.15778   | 0.976246 | 3.838143 | 11.97301 | 5.179533 | -1.2075  | 0.060871 | -0.70663 | 0.329912 | 0.426792  | NA       |
| ATS07571 | ATS07571 | 0        | 0         | 0        | 0.412416 | 0        | 0        | 0        | 0         | 0        | 0.959536 | 0        | 0        | 0.066171 | NA       | 0        | NA       | 0.145274  | NA       |
| ATS07572 | ATS07572 | 0        | 0         | 1.287654 | 0        | 0        | 0        | 0        | 0         | 0        | 0        | 0        | 0        | -0.2184  | NA       | -0.20558 | NA       | -0.19918  | NA       |
| ATS07580 | ERF106   | 389.9605 | 519.2156  | 494.4593 | 773.6916 | 779.0615 | 701.7759 | 874.1853 | 901.952   | 1719.169 | 470.1725 | 506.8572 | 586.3231 | 0.658972 | 0.006627 | 1.267531 | 3.26E-08 | 0.150727  | 0.767369 |
| ATS07590 | ATS07590 | 104.6235 | 92.78079  | 106.8753 | 77.12171 | 76.18374 | 66.78833 | 56.91542 | 55.02339  | 69.31347 | 76.76285 | 97.11438 | 71.47752 | -0.44884 | 0.042914 | -0.72759 | 0.001404 | -0.31779  | 0.395279 |
| ATS07600 | ATS07600 | 2.377808 | 3.568492  | 1.287654 | 0.412416 | 0        | 0        | 0        | 0         | 0        | 1.919071 | 1.330334 | 3.10775  | -1.12162 | 0.077089 | -1.12663 | 0.071038 | -0.01925  | NA       |
| ATS07610 | ATS07610 | 59.4452  | 89.2123   | 88.84815 | 74.7438  | 86.78321 | 91.70935 | 77.3694  | 96.0212   | 109.3396 | 56.6126  | 77.15937 | 49.72351 | 0.088239 | 0.784617 | 0.250912 | 0.409432 | -0.35669  | 0.43068  |
| ATS07620 | ATS07620 | 35.66712 | 64.23286  | 39.91728 | 24.24943 | 20.53649 | 37.87995 | 64.91915 | 65.81229  | 19.52492 | 36.4235  | 66.46235 | 47.26525 | -0.66253 | 0.125749 | 0.109136 | 0.84626  | -0.03624  | 0.975744 |
| ATS07625 | ATS07625 | 0        | 0         | 0        | 0        | 0        | 0        | 0        | 0         | 0        | 0        | 0        | 0        | #N/A     | #N/A     | #N/A     | #N/A     | #N/A      | #N/A     |
| ATS07630 | ATS07630 | 202.1137 | 226.5992  | 269.1198 | 231.3651 | 220.6016 | 241.2355 | 270.3483 | 260.0125  | 197.2017 | 214.936  | 194.2288 | 226.8635 | -0.01079 | 0.96522  | 0.059526 | 0.810278 | -0.12788  | 0.72919  |
| ATS07640 | ATS07640 | 5.94452  | 14.27397  | 7.725926 | 10.31039 | 15.89921 | 20.93366 | 12.45025 | 3.23667   | 18.90968 | 11.51443 | 17.29434 | 7.251346 | 0.628913 | 0.25062  | -0.13843 | 0.848752 | 0.309448  | NA       |
| ATS07650 | FH15B    | 3.566712 | 17.136984 | 1.287654 | 9.073143 | 11.92441 | 11.96209 | 3.557214 | 3.23667   | 6.833722 | 2.878607 | 2.660668 | 3.10772  | 1.170307 | 0.041545 | 0.164049 | 0.839311 | -0.24118  | NA       |
| ATS07660 | SMC6A    | 35.66712 | 28.54794  | 42.49259 | 26.3946  | 24.51129 | 40.87047 | 36.46144 | 39.91893  | 24.40615 | 55.65307 | 53.21336 | 52.83123 | -0.25727 | 0.484389 | -0.09493 | 0.831565 | 0.549717  | 0.263418 |
| ATS07670 | ATS07670 | 208.0582 | 262.2842  | 233.0654 | 233.4272 | 250.4126 | 208.3397 | 262.3445 | 254.618   | 257.7289 | 249.4793 | 231.4781 | 247.5817 | -0.00825 | 0.968713 | 0.146794 | 0.427964 | 0.061246  | 0.86482  |
| ATS07675 | ATS07675 | 0        | 0         | 0        | 0        | 0        | 0        | 0        | 0         | 0        | 0        | 0        | 0        | #N/A     | #N/A     | #N/A     | #N/A     | #N/A      | #N/A     |
| ATS07680 | ANAC080  | 8.322328 | 8.92123   | 3.862963 | 16.90904 | 15.89921 | 19.93682 | 19.56468 | 18.34113  | 8.786214 | 3.838143 | 14.63367 | 5.179533 | 1.071137 | 0.033977 | 0.918893 | 0.092454 | 0.067252  | NA       |
| ATS07685 | ATS07685 | 0        | 1.784246  | 1.287654 | 0        | 0        | 0        | 0        | 0         | 0.976246 | 0.959536 | 1.330334 | 1.035407 | -0.63824 | NA       | -0.32953 | NA       | 0.095244  | NA       |
| ATS07690 | MVB29    | 661.0306 | 372.9074  | 535.6642 | 186.4118 | 147.7302 | 151.5198 | 161.8532 | 152.1235  | 133.7457 | 570.9237 | 588.0076 | 676.447  | -1.64369 | 1.29E-17 | -1.76085 | 2.4E-19  | 0.214726  | 0.563977 |
| ATS07700 | MVB76    | 51.12287 | 35.68492  | 51.50617 | 19.79595 | 20.53649 | 31.8989  | 22.23259 | 24.81447  | 16.59618 | 77.72239 | 62.5257  | 36.25673 | -0.90799 | 0.008856 | -1.03252 | 0.004666 | 0.318342  | 0.612836 |
| ATS07710 | NEN1     | 67.76752 | 92.78079  | 95.28642 | 129.4985 | 124.5438 | 112.643  | 80.92662 | 78.75897  | 62.47974 | 83.4796  | 42.57069 | 75.62118 | 0.514342 | 0.043242 | -0.18655 | 0.560871 | -0.30031  | 0.521684 |
| ATS07720 | GT3      | 41.61164 | 14.27397  | 29.61605 | 12.37247 | 9.274542 | 16.94629 | 17.78607 | 17.26224  | 7.809968 | 39.34096 | 27.93701 | 34.18492 | -1.07003 | 0.008962 | -0.90349 | 0.040754 | 0.201224  | 0.815892 |
| ATS07730 | ATS07730 | 41.61164 | 37.46917  | 48.93086 | 64.74925 | 77.50867 | 70.7757  | 87.15174 | 50.70783  | 83.95716 | 39.34096 | 45.23135 | 41.43626 | 0.683637 | 0.014005 | 0.479764 | 0.009083 | -0.03837  | 0.961629 |
| ATS07740 | FH20     | 649.1416 | 410.3766  | 409.4741 | 365.4002 | 340.5082 | 410.6984 | 394.8507 | 484.4216  | 307.5175 | 396.2882 | 369.8328 | 395.7163 | -0.38928 | 0.084073 | -0.30312 | 0.215428 | -0.33119  | 0.346439 |
| ATS07760 | FH21A    | 14.26685 | 16.05821  | 14.1642  | 39.17948 | 29.81103 | 35.88627 | 16.89677 | 15.10446  | 11.71495 | 12.47396 | 14.63367 | 9.232159 | 1.151774 | 0.002092 | -0.01708 | 0.977125 | -0.25605  | 0.77299  |
| ATS07770 | FH16     | 280.5813 | 239.089   | 225.3395 | 647.9049 | 608.145  | 667.8833 | 308.5883 | 320.4303  | 182.558  | 213.0169 | 180.9254 | 205.1095 | 1.330883 | 2.92E-12 | 1.16815  | 0.665353 | -0.30465  | 0.390399 |
| ATS07780 | FH19     | 4.755616 | 17.136984 | 5.150617 | 33.81808 | 35.77323 | 26.9147  | 8.893035 | 8.63112   | 7.809968 | 0.959536 | 2.660668 | 1.035907 | 2.226472 | 8.12E-07 | 0.454783 | 0.464464 | -1.05479  | NA       |
| ATS07790 | ATS07790 | 120.0793 | 135.6027  | 127.4778 | 139.3965 | 144.4179 | 130.5861 | 115.6095 | 118.6779  | 93.71962 | 124.7396 | 126.3817 | 131.5601 | 0.121145 | 0.570785 | -0.21406 | 0.331245 | 0.004295  | 0.993182 |
| ATS07800 | ATS07800 | 48.74506 | 37.46917  | 51.50617 | 30.10634 | 26.49869 | 22.92734 | 23.12189 | 30.20892  | 17.71495 | 68.12703 | 65.18636 | 53.86714 | -0.73229 | 0.021203 | -1.01839 | 0.002277 | 0.407988  | 0.434126 |
| ATS07810 | ATS07810 | 40.92273 | 51.74313  | 37.34198 | 52.37678 | 35.77323 | 44.85784 | 34.68284 | 47.47116  | 25.3824  | 39.34096 | 34.58868 | 43.50807 | 0.063265 | 0.857073 | -0.24193 | 0.535103 | -0.11017  | 0.880097 |
| ATS07820 | ATS07820 | 137.9129 | 167.7191  | 151.9432 | 178.9884 | 248.4252 | 194.384  | 176.9714 | 147.8079  | 198.1779 | 128.5778 | 166.2917 | 140.8833 | 0.435715 | 0.036271 | 0.195401 | 0.432525 | -0.06865  | 0.889374 |
| ATS07830 | AtGSU2   | 301.9816 | 376.4759  | 323.2012 | 681.3105 | 626.694  | 643.9591 | 539.8072 | 505.9994  | 505.6954 | 272.5081 | 282.0308 | 275.5511 | 0.963308 | 5.42E-16 | 0.633869 | 4.32E-07 | -0.2599   | 0.217892 |
| ATS07840 | ATS07840 | 0        | 0         | 0        | 0        | 0        | 0        | 0        | 0         | 0        | 0        | 0        | 0        | #N/A     | #N/A     | #N/A     | #N/A     | #N/A      | #N/A     |
| ATS07842 | CPuORF16 | 0        | 0         | 0        | 0        | 0        | 0        | 0        | 0         | 0        | 0        | 0        | 0        | #N/A     | #N/A     | #N/A     | #N/A     | #N/A      | #N/A     |
| ATS07850 | ATS07850 | 0        | 0         | 0        | 0.412416 | 0        | 0        | 0.889303 | 0         | 0        | 0        | 0        | 0        | 0.066991 | NA       | 0.136991 | NA       | 0         | NA       |
| ATS07860 | ATS07860 | 203.3026 | 219.4623  | 262.6815 | 209.0947 | 227.2263 | 235.2544 | 278.352  | 280.5114  | 298.7313 | 293.6179 | 284.6915 | 271.4075 | -0.03647 | 0.855667 | 0.317439 | 0.052748 | 0.30449   | 0.19322  |
| ATS07870 | ATS07870 | 229.4585 | 219.4623  | 235.6407 | 244.415  | 232.526  | 286.0933 | 249.8943 | 231.9613  | 164.9856 | 243.722  | 227.4871 | 212.3608 | 0.145918 | 0.496531 | -0.08108 | 0.745265 | -0.00324  | 0.995165 |
| ATS07880 | SNAP29   | 0        | 0         | 0        | 1.237247 | 1.987402 | 0.996841 | 5.57214  | 0         | 1.954292 | 2.878607 | 0        | 3.10772  | 0.606567 | 0.364634 | 0.777829 | 0.245972 | 0.836749  | NA       |
| ATS07890 | ATS07890 | 164.0687 | 198.0153  | 185.4222 | 154.6558 | 210.6646 | 162.485  | 226.7724 | 188.8057  | 214.7741 | 201.5025 | 167.6221 | 188.353  | -0.04761 | 0.845302 | 0.206588 | 0.350036 | 0.035842  | 0.942399 |
| ATS07900 | ATS07900 | 154.5575 | 98.13353  | 106.8753 | 55.6761  | 78.17114 | 60.80729 | 76.4801  | 77.68008  | 77.12343 | 105.5489 | 129.0424 | 114.9856 | -0.87172 | 0.001021 | -0.62648 | 0.010225 | -0.05646  | 0.921879 |
| ATS07910 | ATS07910 | 252.0476 | 260.4999  | 281.9963 | 363.7505 | 527.3239 | 348.8943 | 488.2726 | 366.8226  | 425.6433 | 302.2537 | 291.3431 | 282.8205 | 0.627283 | 0.000931 | 0.672993 | 0.000455 | 0.137422  | 0.7301   |
| ATS07920 | DKG1     | 236.5919 | 174.8561  | 203.4494 | 157.1303 | 141.1055 | 196.3776 | 192.9789 | 195.2791  | 153.2706 | 162.1615 | 162.3007 | 175.0682 | -0.32495 | 0.019516 | -0.12493 | 0.422203 | -0.30002  | 0.349068 |
| ATS07930 | MCT2     | 0        | 0         | 0        | 0        | 0        | 0.889303 | 0        | 0         | 0        | 0        | 0        | 0        | 0        | 0        | 0        | 0        | 0         | 0        |
| ATS07940 | ATS07940 | 457.728  | 353.2807  | 330.9272 | 237.5514 | 210.0021 | 342.9132 | 330.8209 | 340.9292  | 214.7741 | 302.2537 | 316.6195 | 335.6337 | -0.52105 | 0.027155 | -0.35463 | 0.171466 | -0.25165  | 0.505223 |
| ATS07950 | ATS07950 | 63.01191 | 48.17464  | 59.2321  | 133.2102 | 117.2567 | 124.6051 | 120.056  | 171.20674 | 80.05217 | 88.27728 | 69.17737 | 76.65708 | 1.080061 | 6.22E-06 | 0.62026  | 0.017944 | -0.426723 | 0.308305 |
| ATS07960 | ATS07960 | 128.4016 | 142.7397  | 149.3679 | 258.997  | 323.284  | 236.2513 | 224.1045 | 171.5435  | 346.6753 | 138.1731 | 145.0064 | 184.3914 | 0.92289  | 0.000175 | 0.786264 | 0.002148 | 0.147014  | 0.788538 |
| ATS07970 | ATS07970 | 40.0606  | 339.0067  | 298.7325 | 254.4602 | 207.3523 | 313.008  | 378.8433 | 376.5326  | 179.6293 | 193.6179 | 324.6015 | 326.3106 | -0.40761 | 0.140736 | -0.14535 | 0.664318 | -0.13181  | 0.816067 |
| ATS07980 | ATS07980 | 292.4704 | 196.2671  | 202.1617 | 146.4075 | 115.9318 | 163.4819 | 177.8607 | 208.2258  | 135.6982 | 187.1094 | 238.1298 | 187.4991 | -0.68341 | 0.002682 | -0.39841 | 0.115937 | -0.17707  | 0.697022 |
| ATS07990 | CYP75B1  | 7.133424 | 5.352738  | 9.01358  | 8.660727 | 7.28714  | 8.971567 | 5.335821 | 6.47334   | 2.928738 | 14.39303 | 15.96401 | 15.53986 | 0.140051 | 0.828888 | 0.140051 | 0.493167 | 0.890222  | NA       |
| ATS08000 | PDCB2    | 153.3686 | 148.0924  | 117.1765 | 144.3455 | 142.4305 | 153.5135 | 122.7239 | 155.3602  | 148.3894 | 195.7453 | 188.9074 | 159.5296 | 0.069815 | 0.770222 | 0.024716 | 0.928311 | 0.371645  | 0.19523  |
| ATS08010 | ATS08010 | 181.9023 | 192.6988  | 187.9975 | 114.3291 | 129.8436 | 137.564  | 152.9602 | 165.0702  | 149.3655 | 213.9764 | 208.8624 | 210.289  | -0.56213 | 0.000388 | -0.26177 | 0.152718 | 0.17123   | 0.561887 |
| ATS08020 | RPA1B    | 90.35667 | 82.07532  | 87.5605  | 45.36571 | 57.63465 | 60.80729 | 51.5796  | 56.1211   | 75.80313 | 67.84703 | 80.80071 | 80.80071 | -0.66747 | 0.004866 | -0.8655  | 0.000485 | -0.20292  | 0.661433 |
| ATS08030 | GDDP6    | 36.85602 | 44.60615  | 52.79383 | 18.5587  | 19.21155 | 24.92102 | 4.446518 | 8.63112   | 0.972646 | 33.56875 | 35.91902 | 54.90305 | -1.02824 | 0.003028 | -2.72464 | 1.05E-11 | -0.50902  | 0.914481 |
| ATS08040 | TOM5     | 78.46756 | 55.31163  | 61.67401 | 129.49   |          |          |          |           |          |          |          |          |          |          |          |          |           |          |

|           |           |           |          |          |          |          |          |          |          |           |          |          |          |           |          |           |          |          |          |
|-----------|-----------|-----------|----------|----------|----------|----------|----------|----------|----------|-----------|----------|----------|----------|-----------|----------|-----------|----------|----------|----------|
| ATSG08480 | VQ31      | 7.133424  | 7.136984 | 9.01358  | 6.186234 | 11.92441 | 4.984204 | 8.893035 | 8.63112  | 9.76246   | 8.635821 | 18.62468 | 11.39497 | -0.01996  | 0.977208 | 0.169901  | 0.809949 | 0.557516 | NA       |
| ATSG08490 | PCMP-E32  | 10.70014  | 12.48972 | 10.30123 | 10.7228  | 2.649869 | 12.95899 | 19.56468 | 20.49891 | 4.88123   | 12.47396 | 15.96401 | 10.35907 | -0.28399  | 0.656494 | 0.344248  | 0.598901 | 0.163813 | NA       |
| ATSG08500 | ATSG08500 | 299.6038  | 285.4794 | 316.763  | 299.8261 | 327.2588 | 380.7932 | 388.6256 | 345.2448 | 260.6577  | 317.6063 | 230.1478 | 272.4434 | 0.150092  | 0.502377 | 0.136887  | 0.569149 | -0.13073 | 0.742849 |
| ATSG08505 | ATSG08505 | 0         | 0        | 0        | 0        | 0        | 0        | 0.889303 | 0        | 0         | 0        | 0        | 0        | 0         | NA       | 0.160764  | NA       | 0        | NA       |
| ATSG08510 | PCMP-E20  | 58.25629  | 42.8219  | 52.79383 | 74.64272 | 96.05775 | 83.73463 | 61.36194 | 78.75897 | 84.9334   | 64.28889 | 59.86503 | 55.93985 | 0.673341  | 0.00667  | 0.502738  | 0.066923 | 0.199036 | 0.701342 |
| ATSG08520 | ATSG08520 | 5153.6065 | 503.1574 | 497.0346 | 473.0407 | 400.1302 | 482.4709 | 485.5597 | 482.2638 | 434.9236  | 467.2939 | 627.9176 | 493.0915 | -0.157884 | 0.357871 | -0.10895  | 0.569938 | 0.063862 | 0.855952 |
| ATSG08530 | C151      | 1748.878  | 1596.9   | 1404.831 | 1258.28  | 1183.829 | 1388.599 | 1251.25  | 1385.295 | 1588.352  | 1357.743 | 1287.763 | 1520.711 | -0.30755  | 0.03747  | -0.1673   | 0.319553 | -0.18642 | 0.458888 |
| ATSG08535 | ATSG08535 | 48.74506  | 74.93833 | 50.21852 | 91.14384 | 96.72022 | 103.6714 | 72.03358 | 75.5223  | 102.5058  | 68.12703 | 43.90102 | 70.44164 | 0.731379  | 0.004677 | 0.521992  | 0.067351 | 0.102696 | 0.875045 |
| ATSG08540 | ATSG08540 | 731.1759  | 645.8971 | 647.6901 | 595.5281 | 636.631  | 610.0666 | 692.7674 | 631.1506 | 744.8757  | 812.7267 | 775.5847 | 683.6983 | -0.13755  | 0.339112 | 0.029296  | 0.871795 | 0.16232  | 0.470864 |
| ATSG08550 | ILP1      | 219.9472  | 194.4828 | 167.3951 | 139.3965 | 98.04516 | 160.4914 | 153.8495 | 153.2024 | 116.1733  | 149.6876 | 162.3007 | 133.6319 | -0.53813  | 0.01538  | -0.4453   | 0.06182  | -0.37593 | 0.288581 |
| ATSG08560 | ATSG08560 | 470.806   | 426.4348 | 455.8296 | 432.2115 | 347.1329 | 429.6384 | 463.3271 | 487.6583 | 376.831   | 376.138  | 368.5025 | 422.6499 | -0.16219  | 0.357051 | -0.0293   | 0.895119 | -0.21072 | 0.439791 |
| ATSG08565 | ATSG08565 | 14.26685  | 24.79744 | 23.17778 | 34.64291 | 31.13596 | 24.92102 | 36.46144 | 23.73558 | 22.45366  | 32.62421 | 46.56169 | 26.93357 | 0.524789  | 0.179304 | 0.389109  | 0.379367 | 0.696594 | 0.219426 |
| ATSG08570 | ATSG08570 | 656.275   | 631.6231 | 578.1568 | 364.163  | 349.7827 | 362.85   | 433.0908 | 432.6349 | 402.2133  | 570.9237 | 607.9626 | 561.4613 | -0.786    | 5.62E-13 | -0.55234  | 1.23E-06 | -0.10106 | 0.625681 |
| ATSG08580 | ATSG08580 | 221.1361  | 231.952  | 190.5728 | 268.4825 | 283.536  | 266.1565 | 239.2226 | 263.2491 | 190.368   | 260.0342 | 300.6555 | 240.3303 | 0.343733  | 0.053685 | 0.106384  | 0.636508 | 0.309076 | 0.26181  |
| ATSG08590 | SRKZG     | 961.8233  | 1127.643 | 1149.875 | 955.1545 | 996.3508 | 966.9356 | 1082.282 | 869.5853 | 1019.201  | 1064.125 | 1172.024 | 1080.451 | -0.14759  | 0.300213 | -0.12085  | 0.436627 | 0.034218 | 0.913775 |
| ATSG08600 | ATSG08600 | 38.04493  | 37.46917 | 56.65679 | 70.11065 | 4.637271 | 5.981045 | 8.893035 | 14.02557 | 15.61994  | 47.97678 | 49.22236 | 45.57989 | -2.56118  | 3.18E-13 | -1.63731  | 3.26E-06 | 0.104202 | 0.89034  |
| ATSG08610 | RH26      | 762.0874  | 611.9964 | 605.1975 | 562.1224 | 480.2888 | 583.1519 | 598.5012 | 789.7474 | 629.8787  | 545.9758 | 462.9562 | 562.4972 | -0.28193  | 0.11032  | 0.024415  | 0.919197 | -0.32694 | 0.203531 |
| ATSG08620 | RH25      | 306.7372  | 274.7739 | 258.8185 | 217.343  | 207.3523 | 256.1881 | 216.99   | 209.3046 | 176.7005  | 203.4216 | 160.9704 | 217.5404 | -0.30554  | 0.093461 | -0.47038  | 0.009798 | -0.5143  | 0.02711  |
| ATSG08630 | ATSG08630 | 140.2907  | 128.4657 | 108.163  | 143.5206 | 127.8562 | 156.504  | 122.7239 | 160.7546 | 134.7219  | 102.6703 | 95.78405 | 123.2729 | 0.173807  | 0.452488 | 0.141877  | 0.578868 | -0.21789 | 0.569665 |
| ATSG08640 | FLS1      | 121.2682  | 139.1712 | 117.1765 | 106.4032 | 92.74542 | 80.7441  | 56.02612 | 56.10228 | 46.85981  | 198.6239 | 180.9254 | 132.596  | -0.39707  | 0.084946 | -1.19234  | 1.39E-07 | 0.434604 | 0.186928 |
| ATSG08650 | ATSG08650 | 1591.942  | 1612.958 | 1560.336 | 762.9688 | 718.1145 | 735.6685 | 1109.851 | 1157.649 | 831.7616  | 1540.055 | 1412.815 | 1690.599 | -1.08547  | 4.99E-16 | -0.60928  | 1.39E-05 | -0.03292 | 0.927039 |
| ATSG08660 | ATSG08660 | 181.9023  | 237.3047 | 262.6515 | 334.469  | 296.1229 | 375.809  | 331.7102 | 356.0337 | 326.0662  | 192.8667 | 182.2558 | 247.5817 | 0.549948  | 0.00291  | 0.562533  | 0.003003 | -0.12122 | 0.76241  |
| ATSG08670 | ATSG08670 | 2359.974  | 1975.16  | 1963.673 | 1645.126 | 1572.697 | 1785.342 | 1493.141 | 1680.911 | 1680.119  | 1793.372 | 1805.263 | 1769.328 | -0.33137  | 0.005048 | -0.374    | 0.001709 | -0.22985 | 0.204293 |
| ATSG08680 | ATSG08680 | 1506.341  | 1115.154 | 1121.547 | 1092.076 | 1210.99  | 1074.594 | 1021.81  | 947.2654 | 1079.728  | 1120.738 | 1332.995 | 1005.865 | -0.14723  | 0.429624 | -0.29248  | 0.098379 | -0.11473 | 0.725981 |
| ATSG08690 | ATSG08690 | 2054.426  | 1773.541 | 1568.363 | 1348.187 | 1375.282 | 1296.89  | 1236.132 | 1346.455 | 1527.825  | 1659.307 | 1859.807 | 1570.434 | -0.41931  | 0.002777 | -0.3883   | 0.007326 | -0.08461 | 0.775326 |
| ATSG08695 | ATSG08695 | 4.755616  | 0        | 0        | 3.299325 | 4.637271 | 1.993682 | 1.778607 | 1.07889  | 0.972646  | 0        | 3.991002 | 1.035907 | 0.499577  | 0.4936   | -0.17142  | 0.841473 | -0.06598 | NA       |
| ATSG08710 | ATSG08710 | 95.11232  | 124.8972 | 106.8753 | 173.2145 | 133.8184 | 133.5767 | 119.1667 | 125.1512 | 80.05217  | 97.87263 | 101.1054 | 119.1293 | -0.00209  | 0.995102 | -0.00209  | 0.995102 | -0.02725 | 0.965712 |
| ATSG08712 | MIR166C   | 0         | 0        | 0        | 0.412416 | 0        | 0        | 0        | 0        | 0         | 0        | 0        | 0        | 0.095918  | NA       | 0         | NA       | 0        | NA       |
| ATSG08717 | MIR166D   | 0         | 0        | 0        | 0        | 0        | 0        | 0        | 0        | 0         | 0        | 0        | 0        | NA        | NA       | NA        | NA       | NA       | NA       |
| ATSG08720 | ATSG08720 | 464.8614  | 419.2978 | 409.4741 | 226.8286 | 221.9265 | 224.2892 | 279.2413 | 292.3792 | 241.1328  | 479.7678 | 498.8752 | 505.5224 | -0.93333  | 6.98E-14 | -0.66559  | 3.06E-07 | 0.193799 | 0.373889 |
| ATSG08730 | AR16      | 0         | 0        | 0        | 0.412416 | 0.662467 | 0.996841 | 0        | 0        | 0.959536  | 1.330334 | 0        | 0        | 0.406924  | NA       | 0         | NA       | 0.413382 | NA       |
| ATSG08740 | ND1C      | 452.9724  | 410.3766 | 455.8296 | 318.3848 | 329.2462 | 313.008  | 383.2898 | 404.5837 | 369.9972  | 452.9008 | 385.7969 | 433.0089 | -0.45575  | 0.00025  | -0.19059  | 0.189084 | -0.05225 | 0.860356 |
| ATSG08750 | ATSG08750 | 230.6474  | 256.9314 | 222.7642 | 231.3651 | 215.9643 | 239.2418 | 242.7799 | 225.488  | 192.3205  | 272.5811 | 331.2532 | 213.3967 | -0.04541  | 0.852279 | -0.09779  | 0.687909 | 0.196164 | 0.56721  |
| ATSG08760 | ATSG08760 | 30.91163  | 62.44861 | 69.53333 | 240.8507 | 242.463  | 161.4882 | 75.5908  | 64.7334  | 123.007   | 37.30843 | 27.93701 | 54.90305 | 1.865295  | 1.33E-09 | 0.684025  | 0.027377 | -0.36696 | 0.563333 |
| ATSG08770 | ATSG08770 | 53.50068  | 62.44861 | 30.9037  | 67.22374 | 70.22153 | 71.77254 | 48.02239 | 44.23449 | 81.02842  | 40.3005  | 54.54369 | 31.0772  | 0.49176   | 0.140671 | 0.237887  | 0.548896 | -0.20409 | 0.766647 |
| ATSG08780 | ATSG08780 | 101.0568  | 121.3287 | 124.9025 | 72.17273 | 85.45828 | 90.71251 | 77.3694  | 67.97007 | 103.21845 | 94.99403 | 95.78405 | 103.5972 | -0.48134  | 0.019468 | -0.63997  | 0.028681 | -0.22519 | 0.552437 |
| ATSG08790 | NAC081    | 130.7794  | 167.7191 | 145.1549 | 1072.693 | 981.114  | 1222.127 | 978.2338 | 1116.651 | 749.464   | 157.3638 | 145.0064 | 134.6678 | 2.844667  | 2.71E-85 | 2.787009  | 3.34E-81 | -0.01211 | 0.982036 |
| ATSG09210 | ATSG09210 | 0         | 0        | 0        | 0        | 0        | 0.996841 | 0        | 1.07889  | 0         | 0.959536 | 0        | 0        | 0.13292   | NA       | 0.160667  | NA       | 0.155225 | NA       |
| ATSG09220 | AAP2      | 1873.713  | 1454.161 | 1919.893 | 906.9018 | 837.3586 | 939.024  | 1188.999 | 1220.225 | 845.429   | 1710.852 | 1770.675 | 1643.984 | -0.95203  | 1.49E-09 | -0.67826  | 3.24E-05 | -0.0235  | 0.93414  |
| ATSG09225 | ATSG09225 | 65.38972  | 58.88012 | 106.8753 | 158.3676 | 155.6798 | 103.6714 | 155.6281 | 118.6779 | 231.3703  | 124.7396 | 113.0784 | 85.98024 | 0.798095  | 0.007948 | 1.05214   | 0.000402 | 0.443613 | 0.380750 |
| ATSG09230 | SR12      | 122.5571  | 114.1917 | 118.4642 | 123.3123 | 102.6824 | 124.6051 | 140.51   | 125.1512 | 111.292   | 127.6182 | 135.6941 | 158.4937 | -0.02248  | 0.933733 | -0.082573 | 0.755695 | 0.239357 | 0.493509 |
| ATSG09240 | ATSG09240 | 23.77808  | 32.11643 | 24.46543 | 21.44561 | 24.51129 | 18.93997 | 16.89677 | 9.710009 | 18.54867  | 25.90746 | 23.94601 | 41.43626 | -0.25325  | 0.555712 | -0.71285  | 0.088581 | 0.19707  | 0.802435 |
| ATSG09250 | KWIH      | 48.74506  | 73.15409 | 50.21852 | 93.20592 | 92.74542 | 60.80729 | 80.92662 | 61.49673 | 132.7695  | 50.85539 | 65.18636 | 75.62218 | 0.510535  | 0.126201 | 0.648198  | 0.055444 | 0.155311 | 0.830895 |
| ATSG09260 | VP52.0    | 80.84547  | 108.8389 | 119.7519 | 157.1303 | 139.7806 | 146.5356 | 138.7313 | 126.2301 | 197.2011  | 90.19635 | 117.0694 | 113.9497 | 0.508962  | 0.031011 | 0.564968  | 0.019969 | 0.051852 | 0.931833 |
| ATSG09270 | ATSG09270 | 52.31177  | 37.46917 | 59.2321  | 106.8156 | 100.695  | 115.6335 | 94.26617 | 85.23231 | 123.007   | 62.36982 | 55.87403 | 50.75942 | 1.045673  | 9.2E-06  | 0.957155  | 9.69E-05 | 0.149609 | 0.789071 |
| ATSG09280 | ATSG09280 | 0         | 0        | 0        | 0        | 0        | 0.889303 | 0        | 0        | 0         | 0        | 0        | 0        | 0         | NA       | 0.160764  | NA       | 0        | NA       |
| ATSG09290 | SAL4      | 16.64466  | 21.41095 | 15.45185 | 239.201  | 219.9391 | 208.3397 | 89.81965 | 83.07453 | 77.12343  | 1.919071 | 9.312338 | 3.10772  | 3.5057    | 9.06E-40 | 2.107041  | 7.84E-14 | -1.48174 | 0.003681 |
| ATSG09300 | T5E8_100  | 68.95643  | 69.5856  | 74.68395 | 68.46099 | 80.82101 | 63.79781 | 87.15174 | 87.94145 | 102.4945  | 124.9521 | 133.0334 | 72.51346 | -0.00056  | 0.999192 | -0.11717  | 0.13873  | 0.488241 | 0.203746 |
| ATSG09310 | ATSG09310 | 64.20081  | 92.78079 | 78.54691 | 128.2612 | 141.1055 | 99.68408 | 112.9414 | 102.4945 | 124.9521  | 64.28889 | 51.88302 | 67.33392 | 0.654229  | 0.003942 | 0.530558  | 0.030255 | -0.32003 | 0.453433 |
| ATSG09320 | VP98      | 73.71204  | 94.56504 | 86.27284 | 73.40997 | 76.8462  | 70.7757  | 103.1592 | 84.15342 | 122.0307  | 84.43914 | 69.17737 | 104.6266 | -0.18515  | 0.499183 | 0.284714  | 0.293398 | 0.038539 | 0.951828 |
| ATSG09330 | VNI1      | 349.5378  | 278.3424 | 287.1469 | 328.6952 | 249.7502 | 372.8185 | 306.8097 | 326.9037 | 218.6791  | 213.0169 | 263.     |          |           |          |           |          |          |          |

|           |           |           |           |          |          |          |          |           |          |          |          |          |          |          |           |          |           |           |          |
|-----------|-----------|-----------|-----------|----------|----------|----------|----------|-----------|----------|----------|----------|----------|----------|----------|-----------|----------|-----------|-----------|----------|
| ATSG09760 | PMES1     | 154.5575  | 103.4863  | 103.0123 | 51.55195 | 46.37271 | 46.85152 | 48.91169  | 42.07671 | 42.95482 | 91.15588 | 55.87403 | 87.01615 | -1.26553 | 1.59E-07  | -1.37126 | 5.19E-08  | -0.59626  | 0.098645 |
| ATSG09770 | ATSG09770 | 142.6685  | 123.113   | 150.6565 | 252.8107 | 227.2263 | 229.2734 | 175.1928  | 195.2791 | 209.8929 | 116.1038 | 151.6581 | 183.3555 | 0.745503 | 0.875E-05 | 0.457706 | 0.0028628 | 0.101555  | 8.820024 |
| ATSG09780 | REM23     | 3.566712  | 3.568492  | 5.150617 | 0.412416 | 0        | 0        | 0         | 2.15778  | 0        | 2.878607 | 5.321336 | 8.287252 | -1.62314 | 0.010111  | -1.1712  | 0.08367   | 0.326497  | NA       |
| ATSG09790 | ATXR5     | 48.74506  | 48.17464  | 60.51975 | 70.11065 | 94.73282 | 59.81045 | 77.3694   | 61.49673 | 52.71728 | 60.45074 | 54.54369 | 61.11849 | 0.491275 | 0.079211  | 0.266687 | 0.419883  | 0.150912  | 0.801445 |
| ATSG09795 | ATSG09795 | 0         | 0         | 0        | 0        | 0        | 0        | 0.996841  | 0        | 0        | 0        | 0        | 0        | 0.15625  | NA        | 0        | 0         | 0         | 0        |
| ATSG09800 | PUB28     | 5.94452   | 14.27397  | 9.01358  | 20.62078 | 18.54908 | 34.88943 | 28.45771  | 32.3667  | 34.16861 | 16.31211 | 5.321336 | 16.5745  | 1.140054 | 0.009603  | 1.492534 | 0.00063   | 0.370975  | 0.683412 |
| ATSG09805 | IDL3      | 7.133424  | 7.136984  | 2.575309 | 4.124156 | 4.637271 | 2.990522 | 1.778607  | 0        | 2.928738 | 3.88143  | 10.64267 | 8.287252 | -0.31913 | 0.65628   | -1.02367 | 0.125142  | 0.326811  | NA       |
| ATSG09810 | ACT7      | 4144.519  | 3556.002  | 3378.805 | 2672.453 | 2611.446 | 2705.426 | 2705.426  | 2705.426 | 2705.426 | 2705.426 | 2705.426 | 2705.426 | -0.46844 | 0.000019  | -0.57891 | 9.63E-08  | -0.38615  | 0.005841 |
| ATSG09820 | PAP7      | 86.78999  | 80.29107  | 87.5605  | 98.97974 | 119.2441 | 104.6683 | 216.1007  | 162.9124 | 274.3251 | 94.03449 | 86.47171 | 158.4937 | 0.317899 | 0.288424  | 1.295672 | 3.18E-07  | 0.391931  | 0.388338 |
| ATSG09830 | BOLA2     | 97.49012  | 66.0171   | 93.99877 | 210.7444 | 263.662  | 169.4629 | 99.60199  | 91.70564 | 225.5128 | 112.2657 | 219.5051 | 99.44703 | 1.201553 | 0.000519  | 0.62283  | 0.110417  | 0.660879  | 0.227791 |
| ATSG09840 | ATSG09840 | 61.82301  | 39.25341  | 55.36914 | 20.20836 | 35.77323 | 43.86099 | 27.56841  | 28.05114 | 29.28738 | 41.26003 | 45.23135 | 30.04129 | -0.65818 | 0.052007  | -0.82792 | 0.01918   | -0.415    | 0.47899  |
| ATSG09850 | MED26C    | 455.3502  | 446.0615  | 441.6654 | 370.7616 | 414.7045 | 410.6984 | 368.1716  | 392.7159 | 312.3987 | 500.8776 | 641.221  | 390.5368 | -0.1654  | 0.434782  | -0.31695 | 0.120162  | 0.182677  | 0.592825 |
| ATSG09860 | THO1      | 330.5153  | 305.1061  | 342.5161 | 292.4026 | 277.5738 | 318.989  | 297.9167  | 289.1425 | 290.9213 | 332.9589 | 363.1812 | 329.4183 | -0.15761 | 0.331122  | -0.14509 | 0.322447  | 0.060831  | 0.84446  |
| ATSG09870 | CESA5     | 1570.542  | 1254.325  | 1133.136 | 452.8323 | 414.042  | 585.1455 | 419.7512  | 474.7116 | 410.9996 | 1261.789 | 1078.901 | 1118.779 | -1.42357 | 8.7E-09   | -1.56943 | 3.05E-22  | -0.19064  | 0.543547 |
| ATSG09876 | ATSG09876 | 4.755616  | 3.568492  | 1.287654 | 38.35465 | 28.48609 | 34.88943 | 47.113408 | 37.76115 | 75.17094 | 1.919071 | 3.991002 | 4.103507 | 2.631881 | 7.4E-09   | 3.231766 | 0.607E-13 | -0.33449  | 0.776218 |
| ATSG09880 | ATSG09880 | 743.065   | 733.3251  | 742.9766 | 951.8551 | 942.6909 | 922.0777 | 850.1741  | 935.3976 | 843.4765 | 677.4322 | 633.239  | 678.5188 | 0.341988 | 0.00073   | 0.241363 | 0.027966  | -0.15568  | 0.379696 |
| ATSG09890 | ATSG09890 | 3591.9156 | 356.8492  | 320.242  | 348.4912 | 330.5712 | 422.6605 | 363.7251  | 388.4004 | 355.3535 | 337.7565 | 300.6555 | 347.0287 | 0.049686 | 0.788622  | 0.06356  | 0.745662  | -0.09883  | 0.744836 |
| ATSG09900 | RPNSA     | 1119.9448 | 1115.154  | 123.2722 | 1232.298 | 1390.519 | 1329.788 | 1309.055  | 1297.905 | 1318.908 | 1285.778 | 1470.019 | 115.0386 | 0.189362 | 0.148     | 0.180552 | 0.192558  | -0.173394 | 0.403703 |
| ATSG09910 | ATSG09910 | 0         | 0         | 0        | 0.824831 | 0        | 0        | 0.889303  | 0        | 0        | 2.878607 | 1.330334 | 2.071813 | 0.121131 | NA        | 0.137146 | NA        | 0.949728  | NA       |
| ATSG09920 | NRPB4     | 428.0054  | 467.4725  | 530.5136 | 729.5632 | 966.5398 | 699.7822 | 857.2886  | 613.8884 | 940.1249 | 503.7562 | 512.1786 | 606.0053 | 0.739196 | 0.000143  | 0.739196 | 0.000143  | 0.181017  | 0.629861 |
| ATSG09930 | ABCF2     | 2.377808  | 1.784246  | 5.150617 | 7.835896 | 4.637271 | 14.95261 | 16.89677  | 10.7889  | 5.857476 | 3.88143  | 5.321336 | 3.10772  | 0.974624 | 0.105688  | 1.244427 | 0.04032   | 0.163987  | NA       |
| ATSG09940 | ATSG09940 | 0         | 0         | 0        | 0        | 0        | 0        | 0.889303  | 0        | 0        | 1.330334 | 0        | 0        | 0        | NA        | 0.141773 | NA        | 0.183636  | NA       |
| ATSG09950 | PCMP-H35  | 16.64466  | 5.352738  | 11.58889 | 12.37247 | 5.299738 | 16.94629 | 16.89677  | 14.02557 | 6.833722 | 10.55489 | 14.63367 | 15.5386  | -0.03165 | 0.962896  | 0.09837  | 0.889016  | 0.178438  | NA       |
| ATSG09960 | ATSG09960 | 82.03437  | 107.0548  | 128.7654 | 180.2256 | 148.3927 | 126.5988 | 152.0709  | 103.5734 | 195.2492 | 120.9015 | 147.6671 | 131.5601 | 0.505566 | 0.095902  | 0.486132 | 0.0857    | 0.315219  | 0.498675 |
| ATSG09970 | CYP78A7   | 4.755616  | 10.70548  | 5.150617 | 1.287654 | 1.987402 | 3.987363 | 2.15778   | 2.928738 | 1.878607 | 2.660668 | 2.660668 | 4.103507 | -0.30554 | 0.671895  | -0.45093 | 0.504171  | -0.66009  | NA       |
| ATSG09975 | ATSG09975 | 0         | 0         | 0        | 0        | 0        | 0        | 0         | 0        | 0        | 0        | 0        | 0        | #N/A     | #N/A      | #N/A     | #N/A      | #N/A      | #N/A     |
| ATSG09976 | ATSG09976 | 5.94452   | 10.70548  | 6.483272 | 6.598649 | 3.974804 | 4.984204 | 5.335821  | 3.23667  | 1.952492 | 2.878607 | 13.30334 | 9.323159 | -0.36554 | 0.583392  | -0.73882 | 0.262026  | -0.15007  | NA       |
| ATSG09978 | PEP7      | 0         | 1.784246  | 2.575309 | 2.886909 | 1.987402 | 0.996841 | 1.778607  | 3.23667  | 1.952492 | 0        | 1.330334 | 0        | 0.277768 | 0.721758  | 0.335066 | 0.674107  | -0.48116  | NA       |
| ATSG09980 | PEP4      | 4.755616  | 1.784246  | 2.575309 | 10.7228  | 11.26194 | 4.984204 | 8.893035  | 4.31556  | 1.952492 | 6.716749 | 5.321336 | 4.143626 | 1.06515  | 0.076019  | 0.407268 | 0.582327  | 0.46303   | NA       |
| ATSG09990 | PEP5      | 15.45575  | 8.92123   | 25.75309 | 18.14629 | 18.54908 | 7.974726 | 9.872338  | 6.83112  | 12.6912  | 33.58375 | 34.58868 | 29.00538 | -0.1346  | 0.803317  | -0.61206 | 0.223426  | 0.821181  | 0.186928 |
| ATSG09995 | ATSG09995 | 118.8904  | 165.9349  | 145.5049 | 118.3633 | 115.2693 | 126.5988 | 96.04478  | 85.23231 | 125.9357 | 176.5546 | 170.2827 | 165.745  | -0.2418  | 0.268348  | -0.45887 | 0.034094  | 0.25913   | 0.451483 |
| ATSG10000 | FD4       | 0         | 0         | 0        | 0.412416 | 0        | 0        | 0         | 0        | 0        | 0        | 0        | 0        | 0.095918 | NA        | 0        | 0         | 0         | NA       |
| ATSG10010 | ATSG10010 | 412.5497  | 372.9074  | 410.7617 | 390.5575 | 444.5155 | 381.79   | 337.046   | 379.7693 | 447.1207 | 349.271  | 304.6465 | 408.1472 | 0.02261  | 0.919681  | -0.04196 | 0.856375  | -0.16778  | 0.587439 |
| ATSG10020 | ATSG10020 | 265.1256  | 167.1791  | 171.258  | 127.0274 | 107.3197 | 149.5261 | 118.2774  | 117.599  | 124.9595 | 165.0401 | 141.0154 | 164.7091 | -0.65702 | 0.002644  | -0.729   | 0.000876  | -0.35435  | 0.31024  |
| ATSG10030 | TGA4      | 200.9248  | 132.0342  | 166.1074 | 193.0105 | 142.4305 | 182.4219 | 150.2923  | 166.1491 | 121.0545 | 147.7685 | 139.6851 | 189.5709 | 0.042761 | 0.884565  | -0.19558 | 0.474451  | -0.07075  | 0.894009 |
| ATSG10040 | ATSG10040 | 0         | 0         | 0        | 0.412416 | 0        | 0.996841 | 0         | 0        | 0        | 0        | 1.330334 | 0        | 0.247049 | NA        | 0        | 0         | 0.204255  | NA       |
| ATSG10050 | ATSG10050 | 108.1903  | 128.4657  | 157.0938 | 110.5274 | 118.5816 | 121.6146 | 127.1704  | 129.4668 | 142.5319 | 130.4968 | 123.7211 | 149.1705 | -0.16745 | 0.454095  | 0.020539 | 0.941901  | 0.038681  | 0.9394   |
| ATSG10060 | ATSG10060 | 364.9935  | 374.6917  | 364.4062 | 315.4979 | 315.9969 | 357.8658 | 376.1754  | 325.8248 | 209.8329 | 375.1784 | 464.2866 | 336.6696 | -0.15555 | 0.526267  | -0.26671 | 0.269323  | 0.086524  | 0.856796 |
| ATSG10070 | ATSG10070 | 76.08985  | 82.07532  | 69.53333 | 148.0572 | 139.7860 | 92.70619 | 94.26617  | 92.78453 | 109.3396 | 73.88424 | 109.0874 | 78.7289  | 0.732818 | 0.000257  | 0.368514 | 0.193615  | 0.184016  | 0.719674 |
| ATSG10080 | ATSG10080 | 53.50068  | 30.33218  | 60.51975 | 32.99325 | 14.57428 | 33.89259 | 37.35075  | 40.99782 | 21.47741 | 51.81492 | 38.57969 | 60.08258 | -0.76798 | 0.041764  | -0.50034 | 0.235328  | 0.045829  | 0.962938 |
| ATSG10090 | TPR13     | 0         | 1.784246  | 0        | 0        | 0        | 0        | 1.778607  | 0        | 0        | 0        | 0        | 0        | -0.2855  | NA        | 0.054081 | NA        | -0.06854  | NA       |
| ATSG10100 | TPPI      | 142.6685  | 73.15409  | 95.28642 | 62.68717 | 153.0299 | 74.76306 | 98.71269  | 49.62894 | 246.014  | 70.0461  | 83.81104 | 111.8779 | -0.07967 | 0.910813  | 0.265513 | 0.696771  | -0.17805  | 0.883453 |
| ATSG10110 | ATSG10110 | 134.3461  | 119.5445  | 99.14938 | 125.7868 | 118.5816 | 138.5609 | 136.9527  | 94.94231 | 138.6269 | 153.5257 | 194.2288 | 116.0215 | 0.107874 | 0.715665  | 0.069529 | 0.834127  | 0.371283  | 0.336105 |
| ATSG10120 | EIL4      | 0         | 0         | 0        | 0        | 0        | 0        | 1.07889   | 0        | 0        | 0        | 0        | 0        | 0        | NA        | 0        | 0         | 0         | NA       |
| ATSG10130 | DFC       | 0         | 0         | 0        | 0        | 0.662467 | 0        | 0.889303  | 0        | 0        | 1.330334 | 1.035907 | 0        | 0.093572 | NA        | 0.155384 | NA        | 0.378511  | NA       |
| ATSG10140 | FLC       | 14.26685  | 12.48972  | 25.75309 | 82.48311 | 78.17114 | 108.6556 | 78.25871  | 61.49673 | 92.74337 | 45.09817 | 29.26735 | 21.75404 | 2.116797 | 4.86E-11  | 1.923553 | 5.3E-09   | 0.745522  | 0.177994 |
| ATSG10150 | UFC       | 433.9499  | 501.3731  | 460.9803 | 170.3276 | 160.3171 | 181.425  | 168.9677  | 208.2258 | 200.1304 | 604.5074 | 574.7043 | 524.1687 | -1.42747 | 1.12E-26  | -1.2553  | 6.34E-20  | 0.28798   | 0.168233 |
| ATSG10160 | ATSG10160 | 216.3805  | 228.3835  | 233.0654 | 210.7444 | 219.9391 | 215.3176 | 185.8644  | 176.938  | 256.5727 | 273.4677 | 270.0578 | 258.9766 | -0.06798 | 0.754032  | -0.12546 | 0.56181   | 0.240127  | 0.408217 |
| ATSG10170 | IPS3      | 162.8798  | 105.2705  | 164.8198 | 64.74925 | 69.55906 | 69.77885 | 72.92289  | 67.97007 | 51.74104 | 126.6587 | 135.6941 | 125.3447 | -1.07189 | 2.49E-07  | -1.14291 | 1.36E-07  | -0.1717   | 0.685773 |
| ATSG10180 | SULTR     | 186.6679  | 1391.7112 | 1708.717 | 907.3143 | 797.6106 | 1077.558 | 1325.062  | 1318.404 | 923.2882 | 2194.458 | 1760.032 | 1924.714 | -0.81918 | 6.26E-06  | -0.4678  | 0.017193  | 0.236988  | 0.470766 |
| ATSG10190 | ATSG10190 | 209.2471  | 226.5992  | 177.6963 | 247.8618 | 227.2263 | 246.2197 | 283.6878  | 289.1425 | 299.1803 | 147.7685 | 135.6941 | 139.8474 | 0.236595 | 0.17189   | 0.40417  | 0.016784  | -0.51562  | 0.02     |
| ATSG10200 | ATSG10200 | 194.9802  | 119.5445  | 180.2716 | 73.82239 | 76.18374 | 84.73147 | 97.82338  | 90.62675 | 113.2445 | 149.6876 | 155.6491 | 141.9192 | -1.07048 | 6E-08     |          |           |           |          |

|           |           |          |          |          |          |          |          |          |          |          |          |          |          |          |          |          |           |           |          |
|-----------|-----------|----------|----------|----------|----------|----------|----------|----------|----------|----------|----------|----------|----------|----------|----------|----------|-----------|-----------|----------|
| AT5G10660 | AT5G10660 | 10.70014 | 5.352738 | 7.725926 | 2.062078 | 3.974804 | 2.990522 | 4.446517 | 5.39445  | 5.857476 | 5.757214 | 6.65167  | 6.215439 | -1.07995 | 0.060515 | -0.47729 | 0.478855  | -0.29579  | NA       |
| AT5G10670 | AT5G10670 | 2.377808 | 1.784246 | 0        | 0.412416 | 0        | 0.996841 | 1.778607 | 2.15778  | 0        | 0        | 3.991002 | 1.035907 | -0.47298 | 0.483939 | -0.01582 | 0.98497   | 0.077418  | NA       |
| AT5G10680 | AT5G10680 | 10.70014 | 10.70548 | 11.58889 | 2.062078 | 3.974804 | 5.981045 | 0.889303 | 4.31556  | 6.833722 | 8.635821 | 9.312338 | 7.251346 | -1.18651 | 0.032019 | -1.09422 | 0.065481  | -0.30642  | NA       |
| AT5G10690 | CBSPPR1   | 449.4057 | 399.6711 | 440.3778 | 326.2207 | 303.41   | 313.008  | 284.5771 | 349.5603 | 317.2799 | 469.2129 | 400.4305 | 529.3482 | -0.44713 | 0.002778 | -0.43721 | 0.004922  | 0.116341  | 0.695688 |
| AT5G10695 | AT5G10695 | 29.72226 | 35.68492 | 41.20494 | 371.9988 | 288.8357 | 296.6107 | 222.3259 | 206.068  | 549.6265 | 32.62421 | 33.25835 | 36.25673 | 2.90949  | 4E-20    | 2.931765 | 2.03E-20  | -0.06336  | 0.948017 |
| AT5G10700 | AT5G10700 | 51.12287 | 53.52738 | 66.95803 | 51.96468 | 51.96468 | 54.98478 | 54.98478 | 61.49673 | 69.31347 | 64.28889 | 79.82004 | 64.54398 | -0.09637 | 0.077217 | 0.17942  | 0.5888171 | -0.11426  | 0.851483 |
| AT5G10710 | AT5G10710 | 147.4241 | 132.0342 | 114.6012 | 185.587  | 208.0147 | 181.425  | 224.1045 | 188.8057 | 230.3941 | 125.6992 | 102.4357 | 111.8779 | 0.533005 | 0.003228 | 0.69243  | 0.000128  | -0.20302  | 0.567766 |
| AT5G10720 | AHK5      | 2.377808 | 1.784246 | 0        | 0        | 0.662467 | 0        | 0        | 1.07889  | 1.952492 | 0.995936 | 0        | 3.110772 | -0.53703 | 0.346113 | -0.13897 | 0.859639  | 0.026747  | NA       |
| AT5G10730 | AT5G10730 | 108.1903 | 137.3869 | 124.9025 | 129.9109 | 150.3801 | 128.5925 | 113.8308 | 128.3879 | 155.2231 | 133.3755 | 126.3817 | 87.01615 | 0.146787 | 0.569428 | 0.10492  | 0.718752  | -0.08631  | 0.867506 |
| AT5G10740 | AT5G10740 | 61.82301 | 55.31163 | 66.95803 | 157.1303 | 149.7176 | 141.5514 | 100.4913 | 108.9679 | 133.7457 | 49.89585 | 54.54369 | 53.86714 | 1.243847 | 8.57E-10 | 0.858338 | 8.51E-05  | -0.22257  | 0.62574  |
| AT5G10745 | AT5G10745 | 137.9129 | 105.2705 | 117.1567 | 157.1303 | 179.5286 | 164.4787 | 139.6206 | 117.599  | 167.9143 | 118.0229 | 113.0784 | 135.7038 | 0.451939 | 0.025009 | 0.223583 | 0.349888  | 0.016787  | 0.977385 |
| AT5G10750 | AT5G10750 | 86.78999 | 69.5856  | 86.27284 | 118.3633 | 88.10815 | 125.6019 | 120.9453 | 130.5457 | 119.102  | 66.20796 | 85.14137 | 75.62118 | 0.422625 | 0.056267 | 0.57874  | 0.012027  | -0.11387  | 0.827915 |
| AT5G10760 | AT5G10760 | 775.1654 | 1145.486 | 771.305  | 5762.683 | 5105.635 | 5271.294 | 3480.734 | 3791.219 | 3151.322 | 235.0862 | 248.7725 | 245.5098 | 2.544512 | 1.21E-65 | 1.923693 | 1.15E-37  | -1.8367   | 9.77E-29 |
| AT5G10770 | AT5G10770 | 171.2022 | 160.5821 | 139.0667 | 209.9165 | 157.6672 | 194.384  | 140.51   | 162.9124 | 135.6982 | 147.7685 | 151.6581 | 124.3088 | 0.253031 | 0.220679 | -0.10036 | 0.69333   | -0.15067  | 0.699431 |
| AT5G10780 | AT5G10780 | 456.5391 | 471.0411 | 431.3642 | 667.2884 | 711.4899 | 598.1045 | 556.704  | 534.0505 | 735.1132 | 492.2418 | 498.8752 | 421.614  | 0.534664 | 0.000699 | 0.402042 | 0.011822  | 0.055134  | 0.884754 |
| AT5G10790 | UBP22     | 608.0582 | 169.5034 | 206.0247 | 262.7087 | 311.3596 | 262.1691 | 319.241  | 254.618  | 325.2753 | 211.0978 | 248.7725 | 219.6122 | 0.500765 | 0.004515 | 0.446246 | 0.01645   | 0.202651  | 0.537149 |
| AT5G10800 | AT5G10800 | 23.01191 | 53.52738 | 50.21852 | 23.50769 | 24.51129 | 34.88943 | 39.12935 | 37.76115 | 64.43224 | 60.45074 | 67.84703 | 63.1903  | -0.98861 | 0.000636 | -0.22829 | 0.524618  | 0.183465  | 0.757425 |
| AT5G10810 | ATER      | 126.0238 | 135.6027 | 176.4086 | 302.713  | 309.3722 | 224.8922 | 216.99   | 178.0168 | 214.7771 | 197.6643 | 264.7365 | 211.3249 | 0.910852 | 4.71E-06 | 0.461447 | 0.039721  | 0.594512  | 0.033162 |
| AT5G10820 | AT5G10820 | 43.98945 | 39.25341 | 41.20494 | 42.06639 | 45.71024 | 42.86415 | 69.36567 | 63.65451 | 64.43224 | 34.54328 | 41.24035 | 41.43626 | 0.056134 | 0.871888 | 0.633909 | 0.020471  | -0.0955   | 0.882916 |
| AT5G10830 | AT5G10830 | 15.45575 | 21.41095 | 19.31482 | 33.40566 | 33.12336 | 29.90522 | 29.90522 | 20.49891 | 39.04984 | 25.90746 | 26.60668 | 30.04129 | 0.729096 | 0.047861 | 0.499948 | 0.204773  | 0.511374  | 0.417424 |
| AT5G10840 | TMN8      | 822.7215 | 665.5238 | 651.5531 | 710.1796 | 627.3565 | 819.4031 | 613.6194 | 714.2251 | 483.2418 | 561.3283 | 500.2056 | 545.9227 | 0.007992 | 0.974099 | -0.23799 | 0.242449  | -0.40462  | 0.118762 |
| AT5G10850 | AT5G10850 | 2.377808 | 1.784246 | 1.287564 | 2.474493 | 5.299738 | 5.981045 | 0.889303 | 5.39445  | 5.857476 | 6.716749 | 2.660668 | 5.179533 | 0.508868 | 0.471555 | 0.408463 | 0.597798  | -0.619737 | NA       |
| AT5G10860 | CBSX3     | 1562.22  | 1903.791 | 1824.606 | 2505.425 | 2461.066 | 2441.263 | 3141.02  | 3330.533 | 4082.661 | 1461.373 | 1611.034 | 1890.529 | 0.479659 | 0.001149 | 0.983013 | 1.8E-12   | -0.08995  | 0.776073 |
| AT5G10870 | CM2       | 97.49012 | 94.56504 | 135.2037 | 162.0793 | 195.4278 | 157.5008 | 133.3955 | 160.7546 | 131.7932 | 118.0229 | 97.11438 | 106.6984 | 0.631112 | 0.001868 | 0.359019 | 0.121154  | -0.02565  | 0.965246 |
| AT5G10880 | AT5G10880 | 2.377808 | 1.784246 | 7.725926 | 2.474493 | 1.987402 | 5.981045 | 5.335821 | 5.39445  | 0.976246 | 0.995936 | 3.991002 | 2.078113 | -0.17672 | 0.826202 | -0.02591 | 0.976895  | -0.46586  | NA       |
| AT5G10890 | AT5G10890 | 7.133424 | 7.136984 | 7.725926 | 14.84696 | 15.23675 | 11.96209 | 13.33955 | 10.7889  | 5.857476 | 2.878607 | 13.30334 | 7.251466 | 0.770442 | 0.147945 | 0.343383 | 0.596935  | 0.010806  | NA       |
| AT5G10900 | AT5G10900 | 49.93397 | 49.95889 | 59.2321  | 58.56301 | 54.32232 | 62.80097 | 48.91169 | 67.97007 | 62.21612 | 58.53167 | 65.18636 | 65.26211 | 0.128272 | 0.708134 | -0.09998 | 0.797423  | 0.229687  | 0.676227 |
| AT5G10910 | AT5G10910 | 178.3356 | 199.8356 | 208.6    | 201.2588 | 169.5916 | 160.4914 | 176.9714 | 209.3046 | 210.8691 | 207.2597 | 222.1658 | 249.6535 | -0.12742 | 0.535534 | 0.025095 | 0.920473  | 0.20897   | 0.504728 |
| AT5G10920 | T30N20    | 426.8165 | 412.1608 | 454.54   | 270.5446 | 266.3118 | 285.0965 | 256.1194 | 272.9592 | 255.7765 | 403.9645 | 286.0218 | 484.8043 | -0.62483 | 0.000272 | -0.70668 | 8.46E-05  | -0.13188  | 0.716975 |
| AT5G10930 | CIPK5     | 282.9591 | 281.9109 | 300.0235 | 119.6005 | 110.632  | 89.71567 | 85.37313 | 81.99564 | 91.76712 | 329.1207 | 255.4241 | 301.4488 | -1.38857 | 5.34E-18 | -1.69902 | 1.5E-23   | 0.039108  | 0.926349 |
| AT5G10940 | AT5G10940 | 494.584  | 497.8046 | 418.4877 | 348.0787 | 365.0195 | 408.7047 | 458.8806 | 460.686  | 287.9926 | 474.9701 | 553.4189 | 429.9012 | -0.32425 | 0.119043 | -0.21792 | 0.347601  | 0.045792  | 0.926068 |
| AT5G10945 | MIR156D   | 1.188904 | 1.784246 | 0        | 0.412416 | 0        | 0        | 0.996841 | 0        | 1.07889  | 0        | 0        | 0        | -0.2869  | NA       | -0.282   | NA        | -0.49414  | NA       |
| AT5G10946 | AT5G10946 | 79.65566 | 87.42806 | 73.3963  | 76.793   | 123.8814 | 80.7441  | 125.3918 | 102.4945 | 101.5296 | 102.6703 | 139.6851 | 83.90843 | 0.218341 | 0.477334 | 0.43926  | 0.134212  | 0.414724  | 0.337689 |
| AT5G10950 | AT5G10950 | 180.7134 | 215.8938 | 203.4494 | 221.4642 | 229.8761 | 172.4535 | 220.5473 | 224.4091 | 359.2585 | 139.1327 | 170.2827 | 190.6068 | 0.062725 | 0.833675 | 0.411949 | 0.098224  | -0.25197  | 0.552398 |
| AT5G10960 | CAF1-10   | 1344.65  | 1348.89  | 1402.968 | 1395.614 | 1570.047 | 1570.024 | 1340.18  | 1377.742 | 1826.556 | 1179.269 | 989.7685 | 1218.226 | 0.144604 | 0.403746 | 0.148088 | 0.415578  | -0.26834  | 0.26247  |
| AT5G10970 | AT5G10970 | 30.9115  | 33.90067 | 42.49259 | 25.15735 | 27.16116 | 17.84313 | 14.22886 | 19.42002 | 7.809969 | 37.42219 | 30.59768 | 30.04129 | -0.53892 | 0.139515 | -1.24277 | 0.000792  | -0.11294  | 0.889051 |
| AT5G10980 | HTR8      | 592.0742 | 672.6608 | 683.7445 | 1217.863 | 1275.25  | 991.8566 | 886.1816 | 883.6109 | 1370.649 | 63.32395 | 707.7377 | 672.3033 | 0.826059 | 8.93E-06 | 0.626581 | 0.000522  | -0.046056 | 0.924386 |
| AT5G10990 | AT5G10990 | 4.755616 | 1.784246 | 2.575309 | 0        | 1.987402 | 2.990522 | 1.778607 | 2.15778  | 0.976246 | 0        | 2.660668 | 1.413626 | -0.50463 | 0.490877 | -0.43075 | 0.581508  | -0.23354  | NA       |
| AT5G11000 | AT5G11000 | 240.1586 | 217.678  | 206.0247 | 282.0923 | 317.9843 | 305.0333 | 281.9092 | 302.0892 | 480.313  | 181.3522 | 184.9164 | 182.3195 | 0.462017 | 0.043669 | 0.660655 | 0.001583  | -0.26855  | 0.472572 |
| AT5G11010 | AT5G11010 | 142.6685 | 121.3287 | 114.6012 | 134.8599 | 153.0299 | 167.4693 | 124.5025 | 130.5457 | 74.1947  | 137.2136 | 127.7121 | 128.4524 | 0.247539 | 0.318945 | -0.19929 | 0.476528  | -0.051079 | 0.929099 |
| AT5G11020 | AT5G11020 | 60.6341  | 46.3904  | 43.78025 | 68.04857 | 56.97219 | 79.74276 | 44.46517 | 48.55005 | 48.8123  | 33.58375 | 39.91002 | 48.68761 | 0.40457  | 0.153417 | -0.09596 | 0.801855  | -0.29886  | 0.56723  |
| AT5G11027 | AT5G11027 | 0        | 0        | 0        | 0        | 0        | 0        | 0        | 0        | 0        | 0        | 1.330334 | 0        | 0        | NA       | 0        | NA        | 0.172362  | NA       |
| AT5G11030 | ALF4      | 149.8910 | 151.6609 | 135.2037 | 205.383  | 216.6268 | 241.2355 | 211.6542 | 211.4624 | 165.9618 | 138.1731 | 118.3997 | 148.1346 | 0.586732 | 0.000866 | 0.424649 | 0.027205  | -0.09914  | 0.808921 |
| AT5G11040 | TR5120    | 393.5272 | 305.1061 | 316.763  | 232.119  | 244.4504 | 278.1186 | 258.7873 | 304.247  | 234.299  | 303.2133 | 272.7185 | 294.1975 | -0.43226 | 0.009511 | -0.34955 | 0.050965  | -0.22188  | 0.442559 |
| AT5G11050 | MYB64     | 0        | 0        | 0        | 0        | 0        | 0.996841 | 0        | 1.07889  | 0.976246 | 1.919071 | 0        | 0        | 0.111976 | NA       | 0.313557 | NA        | 0.313696  | NA       |
| AT5G11060 | KNAT4     | 796.5656 | 876.0648 | 789.3321 | 926.2854 | 857.2327 | 796.4758 | 901.7537 | 959.1332 | 828.8328 | 711.0159 | 649.203  | 703.3805 | 0.072445 | 0.618735 | 0.128428 | 0.370859  | -0.24832  | 0.177994 |
| AT5G11070 | AT5G11070 | 380.4493 | 412.1608 | 400.4605 | 440.4598 | 431.9287 | 451.5689 | 578.0473 | 513.5516 | 986.9847 | 450.0222 | 581.3559 | 471.3375 | 0.145175 | 0.590301 | 0.775693 | 0.000487  | 0.320592  | 0.396793 |
| AT5G11080 | AT5G11080 | 0        | 0        | 0        | 0        | 0        | 0        | 0.889303 | 1.07889  | 0        | 0        | 0        | 0        | -0.48988 | NA       | -0.08325 | NA        | -0.23437  | NA       |
| AT5G11090 | AT5G11090 | 238.9697 | 221.2465 | 238.2161 | 221.8796 | 288.8357 | 238.2449 | 241.8905 | 202.8313 | 313.375  | 143.9303 | 170.2827 | 156.4219 | 0.095186 | 0.692033 | 0.114806 | 0.648177  | -0.55999  | 0.0358   |
| AT5G11100 | SYT4      | 17.83356 | 8.92123  | 16.73951 | 7.42348  |          |          |          |          |          |          |          |          |          |          |          |           |           |          |



|           |           |          |           |          |          |          |          |          |          |           |          |          |          |          |           |          |          |          |          |          |
|-----------|-----------|----------|-----------|----------|----------|----------|----------|----------|----------|-----------|----------|----------|----------|----------|-----------|----------|----------|----------|----------|----------|
| AT5G12950 | AT5G12950 | 1031.969 | 1120.507  | 853.7148 | 634.7076 | 641.2683 | 721.7127 | 789.7015 | 830.7453 | 643.3461  | 1113.061 | 1097.526 | 971.6803 | -0.58098 | 8.56E-05  | -0.40137 | 0.010888 | 0.082686 | 0.799656 |          |
| AT5G12960 | AT5G12960 | 137.9129 | 167.7191  | 142.9296 | 72.99756 | 75.52127 | 97.6904  | 97.82338 | 111.1257 | 63.69533  | 142.0113 | 162.3007 | 119.1293 | -0.83593 | 0.0002819 | -0.73497 | 0.00511  | -0.07744 | 0.896855 |          |
| AT5G12970 | AT5G12970 | 24.96698 | 14.27397  | 20.60247 | 7.42348  | 5.962205 | 6.977885 | 9.710009 | 9.304984 | 16.31211  | 11.97301 | 10.35907 | 10.12393 | -1.33716 | 0.002791  | -1.21743 | 0.011463 | -0.5597  | NA       |          |
| AT5G12980 | AT5G12980 | 118.8904 | 126.6815  | 122.3272 | 110.9398 | 114.6068 | 92.70619 | 110.2736 | 78.75897 | 117.1495  | 111.3061 | 101.1054 | 109.8061 | -0.19054 | 0.412222  | -0.24924 | 0.303322 | -0.17977 | 0.654726 |          |
| AT5G12990 | CLE40     | 0        | 1.784246  | 0        | 0        | 0.662467 | 0        | 0        | 0        | 0         | 0        | 0        | 0        | -1.3784  | NA        | -0.76070 | NA       | -0.06605 | NA       |          |
| AT5G13000 | CALS3     | 1160.37  | 1006.315  | 952.8642 | 478.8145 | 367.6693 | 663.896  | 646.5236 | 700.1996 | 410.0233  | 883.7323 | 695.7647 | 958.2137 | -1.00936 | 1.44E-05  | -0.29701 | 0.000964 | -0.28588 | 0.505054 |          |
| AT5G13010 | EMB3011   | 820.3437 | 676.2292  | 543.3901 | 411.1783 | 359.0573 | 451.5689 | 466.8843 | 567.4961 | 469.5734  | 566.126  | 663.8367 | 572.8563 | -0.72713 | 2.42E-05  | -0.43245 | 0.020491 | -0.17687 | 0.594239 |          |
| AT5G13020 | EML3      | 592.0742 | 576.3115  | 629.663  | 655.3283 | 624.7066 | 685.8265 | 635.852  | 693.7262 | 560.1798  | 537.34   | 421.7159 | 556.2816 | 0.124976 | 0.417795  | 0.13548  | 0.402496 | -0.24052 | 0.266279 |          |
| AT5G13030 | AT5G13030 | 802.5102 | 767.2258  | 758.4284 | 725.439  | 703.5402 | 750.6211 | 828.8308 | 876.0586 | 818.0941  | 723.4899 | 792.879  | 781.0735 | -0.09657 | 0.421137  | 0.113806 | 0.359363 | -0.0213  | 0.937332 |          |
| AT5G13050 | 5FCL      | 96.30122 | 132.0342  | 92.71111 | 117.9509 | 90.75802 | 87.72199 | 87.82338 | 102.4945 | 108.3633  | 98.83217 | 103.766  | 118.0933 | -0.0785  | 0.777978  | -0.03869 | 0.901469 | 0.015646 | 0.981084 |          |
| AT5G13060 | ABAP1     | 72.52314 | 58.88012  | 66.95803 | 51.13953 | 45.71024 | 47.84836 | 46.24378 | 46.39227 | 32.21612  | 91.15588 | 77.15937 | 89.08796 | -0.64826 | 0.083026  | -0.64866 | 0.015035 | 0.359756 | 0.366998 |          |
| AT5G13070 | AT5G13070 | 133.1572 | 155.2294  | 162.2444 | 226.8286 | 288.8357 | 160.4914 | 159.1853 | 151.0446 | 239.1803  | 155.4448 | 207.5321 | 149.1075 | 0.567507 | 0.029873  | 0.275032 | 0.368266 | 0.173064 | 0.744836 |          |
| AT5G13080 | WRKY75    | 1.188904 | 1.784246  | 2.575309 | 98.56732 | 97.38269 | 87.72199 | 104.9378 | 90.62675 | 97.6246   | 2.878607 | 0        | 3.10772  | 4.371043 | 2.51E-26  | 4.406182 | 1.44E-26 | -0.04589 | 0.976814 |          |
| AT5G13090 | AT5G13090 | 257.9922 | 231.952   | 233.0654 | 188.8863 | 219.2767 | 170.4598 | 172.5249 | 151.0446 | 254.8002  | 222.6123 | 214.1838 | 235.1508 | -0.31137 | 0.15283   | -0.31375 | 0.174351 | -0.10351 | 0.818128 |          |
| AT5G13100 | AT5G13100 | 479.1283 | 365.7704  | 476.4321 | 328.6952 | 353.0951 | 385.7774 | 280.1306 | 275.1169 | 400.2609  | 419.3171 | 465.6169 | 389.5009 | -0.30868 | 0.114586  | -0.46147 | 0.017529 | -0.05713 | 0.896197 |          |
| AT5G13110 | G6PD2     | 142.6685 | 137.3869  | 115.8889 | 141.871  | 139.7806 | 114.6367 | 134.2848 | 152.1235 | 145.4607  | 147.7685 | 113.0784 | 158.4937 | 0.012997 | 0.961756  | 0.121722 | 0.632283 | 0.090604 | 0.842163 |          |
| AT5G13120 | PNSL5     | 845.3107 | 876.0648  | 896.2074 | 622.7475 | 608.145  | 582.155  | 653.6381 | 645.1762 | 881.5501  | 1072.663 | 1231.889 | 949.9263 | -0.52002 | 0.000854  | -0.25905 | 0.141399 | 0.288242 | 0.239025 |          |
| AT5G13130 | AT5G13130 | 4.755616 | 1.784246  | 2.575309 | 0.412416 | 0.412416 | 0.412416 | 0.996841 | 0        | 1.324935  | 0.996841 | 0        | 2.660668 | -0.82528 | 0.226016  | -0.43203 | 0.579442 | -0.49674 | NA       |          |
| AT5G13140 | AT5G13140 | 536.1957 | 494.2362  | 570.4309 | 339.8034 | 298.7727 | 300.0491 | 336.1567 | 308.5625 | 303.6125  | 556.5307 | 557.4099 | 518.9892 | -0.75929 | 4.2E-10   | -0.74887 | 2.05E-09 | 0.024885 | 0.940181 |          |
| AT5G13150 | ATEX070C1 | 1.188904 | 0         | 0        | 0        | 0.412416 | 0        | 0        | 1.778607 | 0         | 0        | 0        | 0        | -0.01831 | NA        | -0.09113 | NA       | -0.2259  | NA       |          |
| AT5G13160 | PBS1      | 235.403  | 248.0102  | 213.7562 | 233.8396 | 210.0021 | 244.226  | 201.8179 | 238.4347 | 247.9665  | 94.7857  | 164.9614 | 195.7873 | -0.01687 | 0.940213  | -0.0164  | 0.944262 | -0.31259 | 0.22602  |          |
| AT5G13170 | SWEET15   | 0        | 0         | 14.1642  | 33.40566 | 49.68505 | 88.71883 | 26.6791  | 22.4536  | 8.38143   | 11.97301 | 11.97301 | 5.179533 | 1.948317 | 0.001572  | 0.971822 | 0.163001 | 0.188008 | 0.89872  |          |
| AT5G13180 | ANAC083   | 803.6991 | 902.8285  | 813.7975 | 1273.127 | 1477.302 | 1201.193 | 1133.862 | 950.502  | 1117.802  | 853.9867 | 1133.445 | 757.2477 | 0.638543 | 0.000108  | 0.340568 | 0.062893 | 0.1196   | 0.730349 |          |
| AT5G13181 | AT5G13181 | 0        | 0         | 0        | 0        | 0        | 0        | 0        | 0        | 0         | 0        | 0        | 0        | 0        | 0         | 0        | 0        | 0        | 0        |          |
| AT5G13190 | AT5G13190 | 221.1361 | 319.38    | 239.5037 | 577.7942 | 573.6967 | 416.6794 | 690.0995 | 597.705  | 900.0988  | 202.462  | 320.6105 | 256.9048 | 0.980719 | 9.99E-06  | 1.443022 | 2.35E-11 | 0.001105 | 0.9982   |          |
| AT5G13200 | AT5G13200 | 70.14533 | 73.15409  | 56.65679 | 327.458  | 280.2237 | 343.9101 | 348.607  | 371.1381 | 395.3796  | 71.00564 | 82.48071 | 52.83123 | 2.192849 | 6.02E-32  | 2.418254 | 1.74E-38 | 0.03333  | 0.957023 |          |
| AT5G13205 | AT5G13205 | 22.58917 | 33.90067  | 15.45185 | 17.31216 | 24.92102 | 71.14428 | 60.41784 | 28.31113 | 10.55489  | 27.93701 | 16.5745  | -0.04125 | 0.943921 | -0.05172  | 0.013553 | -0.33378 | 0.697022 | -0.70986 | 0.171957 |
| AT5G13210 | AT5G13210 | 51.12287 | 32.11643  | 21.89012 | 72.99756 | 88.77061 | 96.69356 | 125.3918 | 122.9935 | 108.3633  | 23.98839 | 27.93701 | 10.35907 | 1.19233  | 6.08E-05  | 1.644145 | 1.63E-08 | -0.70986 | 0.171957 |          |
| AT5G13220 | TIFY9     | 28.53369 | 16.05821  | 18.02716 | 67.22374 | 78.83361 | 64.79465 | 100.4913 | 92.78453 | 94.69586  | 18.23118 | 54.54369 | 33.14901 | 1.569936 | 1.03E-06  | 1.994287 | 3.09E-10 | 0.604378 | 0.285002 |          |
| AT5G13225 | AT5G13225 | 0        | 0         | 1.287654 | 0        | 0        | 0        | 0        | 0        | 0         | 0        | 0        | 0        | -0.2184  | NA        | -0.20558 | NA       | -0.19918 | NA       |          |
| AT5G13230 | PCMP-H89  | 8.323228 | 7.136984  | 12.87654 | 7.011065 | 13.91181 | 12.95893 | 16.00746 | 23.73558 | 4.88123   | 12.47396 | 9.312338 | 11.39497 | 0.152861 | 0.815849  | 0.501316 | 0.408669 | 0.167113 | 0.706813 |          |
| AT5G13240 | AT5G13240 | 243.7253 | 312.2431  | 333.5025 | 226.4162 | 229.2137 | 209.3366 | 268.5697 | 264.328  | 347.5436  | 336.797  | 275.3791 | 364.6391 | -0.4047  | 0.033081  | -0.01075 | 0.967942 | 0.139133 | 0.706813 |          |
| AT5G13250 | AT5G13250 | 9.511232 | 3.568492  | 5.150617 | 3.299325 | 3.312366 | 2.990522 | 1.778607 | 4.31556  | 1.952492  | 7.626285 | 7.982004 | 3.10772  | -0.66553 | 0.30283   | -0.81541 | 0.228094 | 0.000113 | 0.943921 |          |
| AT5G13260 | AT5G13260 | 360.2379 | 380.0444  | 354.1049 | 366.225  | 321.9591 | 319.9859 | 267.9597 | 276.1958 | 292.8738  | 350.2305 | 355.1992 | 293.1612 | -0.10921 | 0.508943  | -0.37861 | 0.011263 | -0.12989 | 0.63429  |          |
| AT5G13270 | PCMP-H90  | 76.08985 | 80.29107  | 97.86173 | 59.38784 | 57.63465 | 69.77885 | 78.25871 | 106.8101 | 55.64602  | 79.64146 | 91.79304 | 88.05205 | -0.43752 | 0.103995  | -0.08202 | 0.816529 | 0.023763 | 0.974001 |          |
| AT5G13280 | AK1       | 263.9367 | 339.0067  | 303.8864 | 362.1009 | 335.2084 | 358.8627 | 376.1754 | 367.9015 | 370.9735  | 266.7509 | 271.3881 | 330.4542 | 0.22487  | 0.158286  | 0.302018 | 0.061132 | -0.05207 | 0.883508 |          |
| AT5G13290 | CRN       | 137.9129 | 192.78079 | 108.1663 | 95.68041 | 90.09555 | 90.71251 | 104.9378 | 121.9146 | 108.09968 | 152.5662 | 150.3277 | 151.2424 | -0.29651 | 0.205578  | -0.16456 | 0.545341 | 0.396776 | 0.23226  |          |
| AT5G13300 | AGD3      | 559.9738 | 524.56853 | 486.7333 | 436.7481 | 353.7575 | 449.6552 | 486.449  | 529.735  | 405.421   | 553.6521 | 485.5719 | 487.912  | -0.33753 | 0.037154  | -0.14336 | 0.45532  | -0.03946 | 0.920201 |          |
| AT5G13310 | AT5G13310 | 77.27876 | 112.4075  | 108.1663 | 114.2391 | 113.2819 | 109.6525 | 106.1764 | 133.7824 | 145.1467  | 104.5894 | 110.4177 | 87.01615 | 0.187909 | 0.449399  | 0.372509 | 0.11898  | -0.02797 | 0.963016 |          |
| AT5G13320 | GH3.12    | 126.0238 | 135.6027  | 104.3    | 507.6838 | 496.8505 | 548.2624 | 1201.449 | 1163.043 | 93.1122   | 118.0229 | 101.1054 | 116.0215 | 2.047496 | 1.9E-38   | 3.123247 | 6.6E-90  | -0.11228 | 0.781547 |          |
| AT5G13330 | ERF113    | 1.188904 | 1.784246  | 6.438272 | 49.90228 | 49.67964 | 39.87363 | 52.46891 | 62.57562 | 36.1261   | 2.878607 | 0        | 2.071813 | 3.076546 | 2.2E-12   | 3.17346  | 4.98E-13 | -0.45512 | 0.765985 |          |
| AT5G13340 | AT5G13340 | 51.12287 | 42.8219   | 57.94445 | 72.99756 | 80.82101 | 67.78517 | 86.26244 | 60.41784 | 96.64835  | 70.0461  | 74.4987  | 66.29802 | 0.510343 | 0.050601  | 0.641055 | 0.016037 | 0.433255 | 0.299512 |          |
| AT5G13350 | AT5G13350 | 0        | 1.784246  | 0        | 0        | 0        | 0        | 0        | 0        | 0         | 0        | 1.330334 | 0        | -0.27254 | NA        | -0.25305 | NA       | -0.03925 | NA       |          |
| AT5G13360 | AT5G13360 | 111.757  | 103.4863  | 110.7383 | 73.40997 | 82.80841 | 73.76622 | 112.9415 | 119.7568 | 76.14719  | 94.99403 | 86.47171 | 118.0933 | -0.49015 | 0.034699  | -0.0792  | 0.799329 | -0.11573 | 0.817807 |          |
| AT5G13370 | AT5G13370 | 51.12287 | 48.17464  | 60.51975 | 104.3411 | 125.8688 | 138.5609 | 208.097  | 239.5136 | 178.653   | 52.77446 | 45.23135 | 46.61579 | 1.138044 | 3.59E-07  | 1.8951   | 1.32E-18 | -0.14205 | 0.79774  |          |
| AT5G13380 | AT5G13380 | 9.511232 | 8.92123   | 3.862963 | 0        | 1.324935 | 0        | 1.07889  | 0        | 13.4335   | 7.982004 | 15.5386  | -1.96928 | 0.00041  | -1.96928  | 0.001375 | 0.66355  | NA       | 0.958361 |          |
| AT5G13390 | NEF1      | 351.9156 | 324.7328  | 266.5444 | 247.4493 | 223.9139 | 249.2102 | 250.7836 | 249.2236 | 178.653   | 211.0978 | 182.2558 | 210.289  | -0.38013 | 0.039493  | -0.46436 | 0.013986 | -0.62586 | 0.009368 |          |
| AT5G13400 | NPF6.1    | 229.4585 | 319.38    | 247.2926 | 182.7001 | 162.3045 | 242.2323 | 140.51   | 187.7268 | 162.0568  | 286.9012 | 297.9948 | 243.438  | -0.42828 | 0.04326   | -0.6742  | 0.001349 | 0.06245  | 0.995301 |          |
| AT5G13410 | KFBP19    | 241.3475 | 337.2225  | 355.3926 | 228.4782 | 245.7754 | 233.2607 | 291.6915 | 306.4047 | 337.7811  | 427.9529 | 341.8958 | 358.4237 | -0.38833 | 0.031851  | 0.007649 | 0.976173 | 0.275166 | 0.335232 |          |
| AT5G13420 | AT5G13420 | 508.8509 | 360.4177  | 406.8988 | 363.7505 | 411.3922 | 369.8279 | 309.4776 | 353.8759 | 401.2371  | 380.9356 | 400.4305 | 334.5978 | -0.15958 | 0.411832  | -0.26    |          |          |          |          |







|           |            |          |          |          |          |          |          |          |          |          |          |          |          |           |          |           |          |          |          |
|-----------|------------|----------|----------|----------|----------|----------|----------|----------|----------|----------|----------|----------|----------|-----------|----------|-----------|----------|----------|----------|
| AT5G15840 | CO         | 9.511232 | 7.136984 | 5.150617 | 5.773818 | 5.299738 | 3.987363 | 9.782338 | 15.10446 | 6.833722 | 5.757214 | 9.312338 | 14.50269 | -0.40258  | 0.517668 | 0.413777  | 0.520386 | 0.333096 | NA       |
| AT5G15845 | AT5G15845  | 10.70014 | 5.352738 | 1.287654 | 3.299235 | 1.324955 | 3.987363 | 3.557214 | 4.31556  | 0.976246 | 5.757214 | 3.991002 | 2.071813 | -0.66069  | 0.331905 | -0.61387  | 0.401342 | -0.35789 | NA       |
| AT5G15850 | COL1       | 32.10041 | 32.11643 | 48.93086 | 40.41673 | 55.64725 | 30.90266 | 32.01493 | 17.26224 | 17.57243 | 31.66468 | 42.57069 | 34.18492 | 0.162342  | 0.699489 | -0.68273  | 0.079716 | -0.07192 | 0.935568 |
| AT5G15853 | AT5G15853  | 0        | 0        | 1.287654 | 2.886909 | 3.974804 | 1.993682 | 3.557214 | 1.07889  | 0        | 0        | 0        | 1.035907 | 0.958071  | 0.133856 | 0.458876  | 0.527799 | -0.08752 | NA       |
| AT5G15860 | ICME       | 124.8349 | 110.6233 | 100.437  | 252.8107 | 262.9995 | 221.2987 | 120.9453 | 135.9401 | 110.3158 | 92.11542 | 85.14137 | 105.6625 | 1.113482  | 1.6E-10  | 0.119152  | 0.63625  | -0.23921 | 0.509208 |
| AT5G15870 | AT5G15870  | 91.5456  | 74.93833 | 79.83457 | 180.2256 | 162.9669 | 187.4061 | 171.6456 | 196.358  | 209.8929 | 49.89585 | 35.91902 | 42.47217 | 1.069319  | 1.4E-08  | 1.189379  | 3.79E-10 | -0.89294 | 0.001326 |
| AT5G15880 | AT5G15880  | 209.2471 | 180.2088 | 254.9556 | 219.8175 | 278.8987 | 217.3113 | 243.6692 | 236.2769 | 216.7266 | 224.5313 | 230.1478 | 222.7199 | 0.141806  | 0.491432 | 0.102462  | 0.656543 | 0.061813 | 0.882454 |
| AT5G15890 | TBL21      | 0        | 0        | 0        | 1.237247 | 0        | 0        | 0.996841 | 0        | 1.952492 | 0.995936 | 1.330334 | 0        | 0.367176  | NA       | 0.304171  | NA       | 0.343384 | NA       |
| AT5G15900 | TBL19      | 14.26685 | 3.568492 | 6.438272 | 4.536571 | 5.299738 | 2.990522 | 6.225124 | 4.31556  | 3.904984 | 8.635821 | 18.62468 | 9.323159 | -0.71165  | 0.230835 | -0.58503  | 0.371908 | 0.409499 | NA       |
| AT5G15910 | AT5G15910  | 126.0238 | 139.1712 | 140.3543 | 191.7732 | 193.4404 | 176.4408 | 125.3918 | 117.599  | 143.5082 | 147.9615 | 118.3997 | 161.6014 | 0.46782   | 0.010032 | -0.06388  | 0.805598 | 0.086455 | 0.838966 |
| AT5G15920 | SMCS       | 159.3131 | 110.6233 | 151.9432 | 90.31901 | 88.10815 | 109.6525 | 104.0485 | 85.23231 | 72.2422  | 96.9131  | 127.7121 | 110.842  | -0.55557  | 0.012147 | -0.67577  | 0.003161 | -0.39318 | 0.355838 |
| AT5G15930 | PAM1       | 223.5139 | 231.952  | 300.0235 | 285.3916 | 303.41   | 297.0586 | 295.2488 | 283.7481 | 269.4439 | 269.6295 | 254.0938 | 307.6642 | 0.221652  | 0.197221 | 0.162021  | 0.400315 | 0.135252 | 0.667079 |
| AT5G15940 | AT5G15940  | 1.188904 | 1.784246 | 1.287654 | 3.299235 | 6.224673 | 4.984204 | 4.46517  | 2.15778  | 2.928738 | 2.878607 | 1.330334 | 1.035907 | 1.011031  | 0.121396 | 0.572858  | 0.446314 | 0.11515  | NA       |
| AT5G15948 | CPuORF10   | 0        | 0        | 0        | 0        | 0        | 0        | 0        | 0        | 0        | 0        | 0        | 0        | #N/A      | #N/A     | #N/A      | #N/A     | #N/A     | #N/A     |
| AT5G15950 | SAMDC2     | 0        | 0        | 0        | 0.412416 | 0.662467 | 0        | 0        | 0        | 0.976246 | 0        | 2.660668 | 0        | 0.180465  | NA       | 0.151347  | NA       | 0.379107 | NA       |
| AT5G15960 | KIN1       | 8.322328 | 8.91213  | 9.01358  | 7.011065 | 7.28714  | 12.95893 | 14.22886 | 11.86779 | 20.50117 | 14.39303 | 30.59768 | 18.64632 | -0.03954  | 0.952296 | 0.680291  | 0.202575 | 1.047628 | NA       |
| AT5G15970 | KIN2       | 638.444  | 777.9313 | 766.1543 | 877.6203 | 805.5602 | 729.6874 | 988.9055 | 770.3274 | 1848.034 | 861.663  | 1089.544 | 1058.696 | 0.139314  | 0.663673 | 0.693211  | 0.009385 | 0.442905 | 0.282188 |
| AT5G15980 | AT5G15980  | 242.5364 | 130.25   | 142.9292 | 145.5827 | 149.0551 | 159.4945 | 130.7276 | 139.1768 | 115.197  | 147.7685 | 168.9524 | 141.9192 | -0.19285  | 0.462785 | -0.42031  | 0.094656 | -0.17938 | 0.691846 |
| AT5G15990 | AT5G15990  | 0        | 0        | 0        | 0.412416 | 0        | 0        | 0        | 0        | 0        | 0        | 0        | 0        | 0.095918  | NA       | 0         | NA       | 0        | NA       |
| AT5G15995 | AT5G15995  | 1.188904 | 0        | 0        | 0        | 0.662467 | 0        | 0.889303 | 0        | 0.976246 | 0        | 1.330334 | 0        | -0.1395   | NA       | 0.108719  | NA       | -0.0172  | NA       |
| AT5G16000 | NIK1       | 540.9513 | 403.0033 | 533.0889 | 134.8599 | 166.2793 | 170.4598 | 172.5249 | 173.7013 | 203.0592 | 465.3748 | 415.0642 | 510.7019 | -1.65818  | 4.75E-27 | -1.43048  | 9.34E-20 | -0.11284 | 0.735019 |
| AT5G16010 | AT5G16010  | 683.6198 | 872.4867 | 840.8383 | 801.3235 | 761.1749 | 691.8075 | 95.3296  | 828.5875 | 1025.058 | 895.2467 | 921.9214 | 812.1507 | -0.08227  | 0.639901 | -0.224097 | 0.165447 | 0.1339   | 0.623916 |
| AT5G16020 | GEX3       | 2.377808 | 5.352738 | 0        | 4.536571 | 1.987402 | 2.990522 | 6.225124 | 4.31556  | 2.928738 | 0        | 1.330334 | 0        | 0.27474   | 0.726575 | 0.561847  | 0.457492 | -0.79744 | NA       |
| AT5G16023 | RTL18      | 1.188904 | 1.736984 | 3.862963 | 0.412416 | 0        | 0        | 0        | 0        | 0        | 0        | 0        | 0        | -1.495    | 0.008859 | -1.55364  | 0.005314 | -0.52798 | NA       |
| AT5G16030 | AT5G16030  | 4691.415 | 6207.392 | 5526.612 | 2110.743 | 2195.417 | 1925.896 | 1733.252 | 1479.158 | 2174.1   | 4803.435 | 6042.377 | 4881.192 | -1.36999  | 1.37E-17 | -1.57612  | 5.82E-23 | -0.16113 | 0.879579 |
| AT5G16040 | AT5G16040  | 99.86793 | 92.78079 | 81.12222 | 74.2348  | 82.80841 | 91.70935 | 63.14055 | 94.94231 | 92.74337 | 91.15588 | 65.18636 | 83.90843 | -0.1449   | 0.608284 | -0.12759  | 0.681738 | -0.17111 | 0.726694 |
| AT5G16050 | GRF5       | 835.7995 | 822.5374 | 826.6741 | 971.6511 | 1085.784 | 972.9166 | 838.6132 | 832.903  | 1153.923 | 784.9001 | 602.6413 | 792.4685 | 0.281114  | 0.110418 | 0.181804  | 0.547564 | -0.18343 | 0.547564 |
| AT5G16060 | AT5G16060  | 34.47821 | 58.88012 | 48.93086 | 123.3123 | 77.50867 | 65.79149 | 71.14428 | 44.23449 | 85.90965 | 88.27728 | 85.14137 | 90.12387 | 0.877287  | 0.005161 | 0.481834  | 0.180797 | 0.843051 | 0.049666 |
| AT5G16070 | CT68       | 354.2934 | 374.6917 | 377.2827 | 334.0566 | 314.0095 | 310.0175 | 244.5585 | 313.957  | 278.2301 | 259.0746 | 230.1478 | 376.0341 | -0.2002   | 0.343004 | -0.39447  | 0.052397 | -0.34161 | 0.251552 |
| AT5G16080 | CXE17      | 5.94452  | 5.352738 | 6.438272 | 25.15735 | 25.83622 | 29.03666 | 15.11816 | 14.02557 | 12.6912  | 7.676285 | 7.982004 | 9.323159 | 1.699083  | 0.000116 | 0.964784  | 0.057851 | 0.337362 | NA       |
| AT5G16090 | AT5G16090  | 1.188904 | 0        | 0        | 0        | 0        | 0        | 0        | 0        | 0        | 0        | 0        | 1.035907 | -0.21339  | NA       | -0.19896  | NA       | -0.02174 | NA       |
| AT5G16100 | AT5G16100  | 0        | 1.784246 | 0        | 0        | 0        | 0        | 1.778607 | 0        | 0        | 0        | 1.330334 | 0        | -0.28367  | NA       | 0.053066  | NA       | -0.04557 | NA       |
| AT5G16110 | AT5G16110  | 771.5987 | 786.8525 | 763.579  | 691.6209 | 588.2709 | 723.7064 | 793.2587 | 889.0053 | 711.6833 | 569.0046 | 642.5513 | 603.9335 | -0.211    | 0.146756 | 0.043351  | 0.817582 | -0.35179 | 0.663367 |
| AT5G16120 | AT5G16120  | 280.5813 | 264.0684 | 309.037  | 335.7063 | 266.9743 | 315.9985 | 412.6368 | 376.5326 | 362.1873 | 248.5197 | 252.7635 | 282.8025 | 0.10255   | 0.576696 | 0.422467  | 0.007562 | -0.12369 | 0.092339 |
| AT5G16130 | RPS7C      | 2025.892 | 2137.527 | 2286.874 | 2253.026 | 2463.716 | 2110.312 | 1630.093 | 1688.463 | 2044.259 | 2177.186 | 2270.88  | 2271.743 | 0.081679  | 0.587036 | -0.26365  | 0.049912 | 0.058389 | 0.836799 |
| AT5G16140 | CRS2B      | 80.84547 | 92.78079 | 115.8889 | 116.7136 | 132.4935 | 103.6714 | 117.3881 | 130.5457 | 112.2683 | 184.2308 | 187.5771 | 136.7397 | -0.280282 | 0.239068 | -0.302098 | 0.330053 | 0.78508  | 0.002823 |
| AT5G16150 | GLT1       | 2046.104 | 2069.725 | 1851.647 | 1007.944 | 1091.084 | 1207.174 | 1125.858 | 1185.7   | 926.4574 | 1865.337 | 1672.23  | 1833.555 | -0.84399  | 1.36E-11 | -0.87161  | 3.84E-12 | -0.14913 | 0.535672 |
| AT5G16160 | AT5G16160  | 9.511232 | 5.352738 | 9.01358  | 17.73387 | 13.91181 | 14.95261 | 9.782338 | 16.18335 | 15.16934 | 6.762825 | 14.63367 | 12.43088 | 0.779494  | 0.107601 | 0.606427  | 0.262897 | 0.371714 | NA       |
| AT5G16170 | AT5G16170  | 16.64466 | 21.41095 | 16.73951 | 47.42779 | 45.04777 | 45.85468 | 49.80099 | 30.20892 | 33.19236 | 6.716749 | 7.982004 | 11.39497 | 1.259196  | 0.000223 | 0.985255  | 0.007477 | -0.87713 | 0.156151 |
| AT5G16180 | CRS1       | 375.6396 | 353.2807 | 355.3926 | 353.4401 | 377.6063 | 387.7111 | 409.0796 | 426.1615 | 287.0163 | 379.0166 | 405.7519 | 393.6445 | 0.040805  | 0.849552 | 0.046987  | 0.83826  | 0.15737  | 0.731829 |
| AT5G16190 | CSL1A1     | 51.12287 | 44.60615 | 59.2321  | 58.56301 | 68.23413 | 57.81677 | 43.57587 | 62.57562 | 68.07357 | 77.72239 | 74.4987  | 55.93895 | 0.231018  | 0.45705  | -0.11731  | 0.754048 | 0.393342 | 0.389772 |
| AT5G16200 | AT5G16200  | 15.45575 | 30.33218 | 29.61605 | 25.15735 | 35.77323 | 33.89259 | 28.45771 | 21.5778  | 58.57476 | 16.31211 | 17.29434 | 14.50269 | 0.303467  | 0.514551 | 0.492402  | 0.286061 | -0.5436  | 0.458434 |
| AT5G16210 | AT5G16210  | 662.2195 | 661.9553 | 647.6901 | 447.8833 | 404.7675 | 485.4615 | 513.1281 | 607.415  | 289.9451 | 649.6056 | 645.212  | 527.2764 | -0.54171  | 0.017462 | -0.46785  | 0.051677 | -0.11036 | 0.724916 |
| AT5G16220 | AT5G16220  | 357.8601 | 339.0067 | 301.3111 | 270.5446 | 236.5008 | 267.1533 | 310.3669 | 316.1148 | 198.1779 | 313.7682 | 348.5475 | 246.5458 | -0.35639  | 0.098163 | -0.26799  | 0.25603  | -0.13384 | 0.852829 |
| AT5G16230 | S-ACP-DES3 | 4.755616 | 1.736984 | 3.862963 | 4.124166 | 3.312366 | 2.990522 | 2.66791  | 2.15778  | 6.833722 | 2.878607 | 5.321336 | 4.143626 | -0.35588  | 0.614669 | -0.25989  | 0.742929 | -0.2257  | NA       |
| AT5G16235 | AT5G16235  | 2.377808 | 0        | 2.575309 | 0.412416 | 0.662467 | 0.996841 | 0.889303 | 1.07889  | 0        | 1.919071 | 2.660668 | 2.071813 | -0.56015  | 0.427074 | -0.50537  | 0.492349 | 0.175384 | NA       |
| AT5G16240 | S-ACP-DES1 | 139.1018 | 162.3664 | 166.1074 | 49.48987 | 48.36011 | 50.83888 | 64.91915 | 57.18117 | 67.36097 | 149.6876 | 160.9704 | 161.6014 | -1.60897  | 5.77E-19 | -1.26168  | 1.99E-11 | 0.018586 | 0.971051 |
| AT5G16250 | AT5G16250  | 179.5425 | 194.4828 | 158.3815 | 268.4825 | 255.7124 | 219.305  | 162.7425 | 159.6757 | 241.3329 | 199.5823 | 235.4691 | 253.7971 | 0.478263  | 0.020583 | 0.083791  | 0.764225 | 0.363891 | 0.26181  |
| AT5G16260 | ELF9       | 246.1031 | 267.6369 | 267.8321 | 271.7819 | 249.7502 | 222.2995 | 230.3296 | 251.3814 | 266.5152 | 288.0525 | 230.1478 | 231.0072 | -0.05991  | 0.769337 | -0.06068  | 0.783215 | -0.06141 | 0.870405 |
| AT5G16270 | SYN4       | 495.5088 | 628.0546 | 512.4864 | 437.9853 | 480.9512 | 511.3793 | 473.1095 | 540.5239 | 370.9735 | 509.5134 | 550.7583 | 562.4972 | -0.35594  | 0.054247 | -0.40006  | 0.028502 | -0.17516 | 0.585296 |
| AT5G16280 | AT5G16280  | 492.2062 | 469.2567 | 455.8296 | 319.6221 | 323.284  | 375.809  | 409.9689 | 426.1615 | 238.204  | 377.0975 | 450.9832 | 450.6193 | -0.46632  | 0.026235 |           |          |          |          |

|           |           |          |          |          |           |          |          |           |          |           |           |          |           |          |          |          |          |          |            |
|-----------|-----------|----------|----------|----------|-----------|----------|----------|-----------|----------|-----------|-----------|----------|-----------|----------|----------|----------|----------|----------|------------|
| AT5G16750 | TOZ       | 197.3581 | 167.7191 | 211.1753 | 139.3965  | 145.0803 | 173.4503 | 151.1816  | 178.0168 | 158.1519  | 183.2713  | 175.6041 | 218.5763  | -0.34389 | 0.065252 | -0.24636 | 0.236094 | -0.00157 | 0.997242   |
| AT5G16760 | ITPK1     | 334.082  | 387.1814 | 391.4469 | 340.6553  | 406.0924 | 384.7805 | 331.7102  | 316.1148 | 371.9497  | 295.537   | 316.6195 | 355.3159  | 0.023516 | 0.98089  | -0.12053 | 0.520889 | -0.19599 | 0.464701   |
| AT5G16770 | ATMYB9    | 13.07794 | 5.352738 | 7.75926  | 13.60971  | 10.59948 | 4.984204 | 9.782338  | 7.55223  | 10.79877  | 1.91937   | 1.939071 | 4.143626  | 0.158507 | 0.812377 | 0.05747  | 0.939452 | -0.80635 | NA         |
| AT5G16780 | DOT2      | 655.0861 | 529.9211 | 521.5    | 492.8366  | 488.9008 | 538.294  | 475.7774  | 517.8672 | 657.9898  | 489.3632  | 532.1336 | 493.0915  | -0.16858 | 0.349127 | -0.04928 | 0.823945 | -0.17294 | 0.557232   |
| AT5G16790 | THO7A     | 19.02246 | 24.97944 | 12.87654 | 21.44651  | 23.18635 | 23.92418 | 20.45398  | 16.18335 | 19.52492  | 28.98839  | 22.61568 | 19.68222  | 0.264379 | 0.540336 | 0.014643 | 0.97869  | 0.226233 | 0.778505   |
| AT5G16800 | AT5G16800 | 183.0012 | 190.9143 | 198.2988 | 228.0658  | 249.0877 | 256.1881 | 239.2226  | 239.5136 | 278.2301  | 160.24301 | 133.0334 | 165.745   | 0.347695 | 0.030386 | 0.039765 | 0.018151 | -0.30434 | 0.251622   |
| AT5G16810 | AT5G16810 | 238.9697 | 251.5787 | 239.5037 | 189.7112  | 191.453  | 188.4029 | 206.3184  | 187.7268 | 192.3055  | 274.4272  | 228.8174 | 276.587   | -0.35023 | 0.027388 | -0.30734 | 0.059931 | 0.102196 | 0.739252   |
| AT5G16820 | HSFA1B    | 189.0357 | 258.7157 | 193.1482 | 257.3473  | 264.3244 | 284.0996 | 281.0199  | 258.9336 | 204.0324  | 10.1383   | 215.5141 | 191.6427  | 0.323208 | 0.020415 | 0.232054 | 0.291057 | -0.04266 | 0.927039   |
| AT5G16830 | SYP21     | 312.6817 | 344.3595 | 301.3111 | 407.0542  | 476.314  | 483.4678 | 564.7077  | 397.0315 | 358.2823  | 407.8026  | 505.5269 | 383.2854  | 0.499125 | 0.011718 | 0.453927 | 0.028694 | 0.424418 | 0.14486    |
| AT5G16840 | BPA1      | 407.7941 | 406.8081 | 372.1321 | 512.2201  | 581.6463 | 533.3098 | 510.4602  | 523.2616 | 466.6456  | 511.4325  | 529.4729 | 488.9479  | 0.450709 | 0.000228 | 0.335417 | 0.010709 | 0.362384 | 0.031113   |
| AT5G16850 | TERT      | 3.566712 | 1.736984 | 1.287654 | 2.474493  | 2.649869 | 5.981045 | 7.114428  | 4.31556  | 1.952492  | 2.878607  | 3.991002 | 8.287252  | -0.09143 | 0.911061 | 0.154453 | 0.855259 | 0.267117 | NA         |
| AT5G16860 | PCMP-H92  | 28.53369 | 16.05821 | 9.01358  | 22.68286  | 14.57428 | 21.9305  | 17.78607  | 21.5778  | 14.64369  | 15.35257  | 14.63367 | 24.86176  | 0.110749 | 0.839919 | -0.01204 | 0.984654 | 0.018303 | 0.988816   |
| AT5G16870 | AT5G16870 | 55.87849 | 89.2123  | 88.84815 | 87.4321   | 74.19633 | 101.6778 | 78.25871  | 67.97007 | 105.4346  | 94.99403  | 95.78405 | 70.44164  | 0.167766 | 0.592604 | 0.113967 | 0.749019 | 0.160929 | 0.774305   |
| AT5G16880 | AT5G16880 | 1073.58  | 1366.732 | 1281.216 | 1765.551  | 1848.946 | 1991.688 | 1602.525  | 1618.335 | 1504.395  | 1179.269  | 1227.898 | 1034.871  | 0.586273 | 2.2E-06  | 0.3431   | 0.010411 | -0.10977 | 0.664397   |
| AT5G16890 | AT5G16890 | 104.6235 | 89.2123  | 124.9025 | 99.39215  | 96.72022 | 103.6714 | 80.03731  | 98.17898 | 171.26596 | 11.73821  | 11.97301 | 89.08796  | -0.09893 | 0.698614 | -0.35827 | 0.1298   | -0.2332  | 0.550539   |
| AT5G16900 | AT5G16900 | 1.188904 | 1.784246 | 0        | 9.073143  | 3.947804 | 7.974726 | 1.778607  | 0        | 0         | 0.995936  | 1.330334 | 1.035907  | 1.637073 | 0.00866  | -0.21071 | 0.804027 | 0.033015 | NA         |
| AT5G16910 | CLSD2     | 278.2035 | 246.226  | 169.9704 | 171.5649  | 188.8032 | 269.147  | 219.658   | 288.0636 | 189.3917  | 153.5257  | 142.3457 | 160.5655  | -0.14444 | 0.61954  | 0.004644 | 0.989106 | -0.57877 | 0.095621   |
| AT5G16920 | AT5G16920 | 8.322328 | 1.784246 | 5.150617 | 0.412416  | 0        | 0        | 0         | 0        | 0         | 0.595356  | 10.64267 | 5.179533  | -1.7625  | 0.004683 | -1.84079 | 0.003466 | 0.551732 | NA         |
| AT5G16930 | AT5G16930 | 54.68958 | 24.97944 | 37.34198 | 33.81808  | 39.08557 | 36.88311 | 41.79726  | 42.07671 | 38.07359  | 33.58375  | 19.95501 | 42.47217  | -0.1208  | 0.768607 | 0.025553 | 0.956731 | -0.27416 | 0.675201   |
| AT5G16940 | AT5G16940 | 35.66712 | 55.31163 | 33.47901 | 30.51875  | 29.81103 | 26.9147  | 19.56468  | 23.73558 | 31.23987  | 61.41028  | 29.26735 | 40.40035  | -0.44137 | 0.22494  | -0.6558  | 0.083693 | 0.131338 | 0.88579    |
| AT5G16950 | AT5G16950 | 28.53369 | 16.05821 | 29.61605 | 56.08852  | 43.06037 | 32.89575 | 30.23632  | 33.44559 | 81.02842  | 20.15025  | 27.93701 | 40.40035  | 0.72129  | 0.09286  | 0.820303 | 0.061824 | 0.192493 | 0.838515   |
| AT5G16960 | AT5G16960 | 13.07794 | 5.352738 | 6.438272 | 15.67179  | 10.59948 | 22.92734 | 10.59948  | 15.10446 | 10.73871  | 17.2164   | 11.97301 | 26.93357  | 0.725368 | 0.149905 | 0.602322 | 0.076629 | 0.926611 | NA         |
| AT5G16970 | P1        | 315.0595 | 296.1848 | 342.5161 | 347.6663  | 420.6667 | 470.5088 | 604.7264  | 563.1805 | 701.9209  | 289.7798  | 324.6015 | 332.526   | 0.360648 | 0.033148 | 0.952306 | 7.99E-10 | -0.01459 | 0.976106   |
| AT5G16980 | AT5G16980 | 10.70014 | 16.05821 | 25.75309 | 49.07745  | 47.03518 | 60.80729 | 71.14428  | 61.49673 | 43.93107  | 21.10978  | 19.95501 | 19.68222  | 1.428326 | 1.89E-05 | 1.599928 | 1.95E-06 | 0.17392  | 0.83852    |
| AT5G16990 | P2        | 181.7583 | 239.089  | 252.3803 | 193.8353  | 177.5412 | 171.4566 | 192.0896  | 196.358  | 174.748   | 250.4388  | 224.8264 | 297.3052  | -0.37329 | 0.026072 | -0.32741 | 0.701014 | 0.125208 | 0.702132   |
| AT5G17000 | AT5G17000 | 167.6355 | 174.8561 | 172.5457 | 240.8507  | 259.6872 | 238.4449 | 271.2376  | 245.9869 | 246.9902  | 206.3002  | 194.2288 | 185.4273  | 0.515084 | 0.000473 | 0.563867 | 0.000189 | 0.185511 | 0.509723   |
| AT5G17010 | AT5G17010 | 196.1169 | 195.2294 | 239.5037 | 195.67037 | 193.4404 | 191.3934 | 262.3445  | 219.0147 | 230.3941  | 191.9071  | 182.2558 | 205.1095  | -0.23549 | 0.879719 | 0.253565 | 0.205901 | -0.03783 | 0.994139   |
| AT5G17020 | XPO1      | 985.6014 | 820.7532 | 843.3136 | 620.273   | 730.0389 | 813.4221 | 935.5473  | 986.1054 | 610.1537  | 663.9987  | 601.311  | 862.9101  | -0.28688 | 0.206852 | -0.06486 | 0.821619 | -0.30704 | 0.377108   |
| AT5G17030 | UGT78D3   | 1.188904 | 1.784246 | 0        | 0.124216  | 1.324935 | 0        | 0.889303  | 0        | 0         | 0.995936  | 0        | 0.2071813 | -0.16418 | NA       | -0.32085 | NA       | 0.061676 | NA         |
| AT5G17040 | UGT78D4   | 1.188904 | 5.352738 | 0        | 0.132747  | 2.649869 | 1.993682 | 0.889303  | 1.07889  | 0.976246  | 0.995936  | 2.660668 | 1.035907  | 0.014799 | 0.986862 | -0.39452 | 0.615275 | -0.16483 | NA         |
| AT5G17050 | UGT78D2   | 170.0133 | 157.0137 | 154.5185 | 168.2656  | 166.2793 | 141.5514 | 113.8308  | 117.599  | 160.1043  | 158.3234  | 148.9974 | 153.3142  | -0.00967 | 0.969723 | -0.2939  | 0.170555 | -0.06299 | 0.887938   |
| AT5G17060 | ATARF81B  | 41.61164 | 39.25341 | 45.67037 | 104.7536  | 93.40789 | 84.73147 | 56.91542  | 73.36452 | 81.02842  | 38.38143  | 27.93701 | 49.72351  | 0.901417 | 0.000883 | 0.484266 | 0.121326 | -0.31256 | 0.568131   |
| AT5G17070 | AT5G17070 | 179.5245 | 192.6986 | 206.0247 | 265.5956  | 259.6872 | 233.2607 | 264.1231  | 238.4347 | 215.7504  | 215.8955  | 313.9588 | 241.3662  | 0.387831 | 0.036515 | 0.307478 | 0.128536 | 0.399271 | 0.136943   |
| AT5G17073 | 0         | 0        | 0        | 0        | 0         | 0        | 0        | 0.107889  | 0        | 0         | 0         | 0        | 0         | 0        | NA       | 0.16673  | NA       | 0.0721   | NA         |
| AT5G17080 | AT5G17080 | 2.377808 | 0        | 0        | 0         | 0        | 0        | 2.66791   | 0        | 0         | 0         | 1.330334 | 0         | -0.38626 | NA       | 0.041372 | NA       | -0.16032 | NA         |
| AT5G17090 | AT5G17090 | 0        | 0        | 0        | 0.412416  | 0        | 0        | 0.889303  | 1.07889  | 0         | 0.995936  | 0        | 1.035907  | 0.043461 | NA       | 0.357151 | NA       | 0.373185 | NA         |
| AT5G17100 | AT5G17100 | 0        | 0        | 0        | 0         | 0        | 0        | 0.889303  | 1.07889  | 0         | 0         | 0        | 1.035907  | 0        | NA       | 0.34029  | NA       | 0.182576 | NA         |
| AT5G17110 | AT5G17110 | 0        | 0        | 0        | 0         | 0        | 0        | 0         | 0        | 0         | 0         | 0        | 0         | #N/A     | #N/A     | #N/A     | #N/A     | #N/A     | #N/A       |
| AT5G17120 | AT5G17120 | 0        | 0        | 0        | 0         | 0        | 0        | 0         | 0        | 0         | 0         | 0        | 0         | #N/A     | #N/A     | #N/A     | #N/A     | #N/A     | #N/A       |
| AT5G17125 | AT5G17125 | 5.94452  | 7.136984 | 1.287654 | 0.824831  | 1.324935 | 0.996841 | 0         | 2.15778  | 1.952492  | 0         | 2.660668 | 1.035907  | -1.11155 | 0.091986 | -0.93901 | 0.180761 | -1.01158 | NA         |
| AT5G17130 | AT5G17130 | 0        | 0        | 0        | 0         | 0        | 0        | 0.889303  | 0        | 0         | 0         | 0        | 0         | 0        | NA       | 0.160764 | NA       | 0        | NA         |
| AT5G17140 | AT5G17140 | 1.188904 | 0        | 0        | 0         | 0        | 0        | 0         | 0        | 0         | 0         | 0        | 0         | -0.2184  | NA       | -0.20558 | NA       | -0.19918 | NA         |
| AT5G17150 | AT5G17150 | 0        | 0        | 2.575309 | 3.299325  | 4.637271 | 1.993682 | 7.14428   | 5.39445  | 5.87476   | 2.878607  | 3.991002 | 5.179533  | 0.767226 | 0.254861 | 1.372868 | 0.033078 | 0.919938 | NA         |
| AT5G17160 | AT5G17160 | 172.3911 | 135.6027 | 150.6556 | 164.5538  | 178.8662 | 166.4724 | 168.9677  | 149.9657 | 126.912   | 195.7453  | 214.1838 | 204.0736  | 0.139206 | 0.498945 | -0.04812 | 0.849028 | 0.400415 | 0.120477   |
| AT5G17165 | AT5G17165 | 4.755616 | 3.568492 | 5.150617 | 6.958649  | 5.962205 | 4.984204 | 7.114428  | 2.15778  | 2.928738  | 11.51443  | 6.65167  | 7.251346  | 0.264191 | 0.705023 | -0.10414 | 0.898482 | 0.669084 | NA         |
| AT5G17170 | ENH1      | 773.9765 | 813.6162 | 860.1531 | 850.4009  | 845.9707 | 774.5453 | 1283.2625 | 1342.139 | 1803.126  | 1005.593  | 883.3418 | 1063.876  | 0.014394 | 0.947998 | 0.842065 | 1.37E-08 | 0.267378 | 0.28571    |
| AT5G17180 | AT5G17180 | 0        | 0        | 0        | 0.412416  | 0        | 0        | 0.107889  | 0        | 0         | 0         | 0        | 0         | 0.064603 | NA       | 0.150774 | NA       | 0        | NA         |
| AT5G17190 | AT5G17190 | 291.2815 | 331.8698 | 310.3247 | 653.6787  | 671.0793 | 479.4804 | 571.8221  | 472.5538 | 923.5287  | 311.8491  | 297.9948 | 351.1723  | 0.91954  | 5.37E-05 | 1.038506 | 4.93E-06 | 0.042157 | 0.946773   |
| AT5G17200 | AT5G17200 | 0        | 0        | 0        | 0         | 0        | 0        | 1.778607  | 1.07889  | 0         | 0         | 0        | 2.071813  | 0.441334 | NA       | 0.143284 | NA       | 0.326081 | NA         |
| AT5G17210 | AT5G17210 | 19.02246 | 19.62671 | 27.04074 | 30.93117  | 29.81103 | 23.92418 | 32.01493  | 32.3667  | 37.09735  | 35.50282  | 25.27635 | 29.00538  | 0.344209 | 0.36242  | 0.568562 | 0.129652 | 0.415431 | 0.498675   |
| AT5G17220 | GSTF12    | 26.15589 | 16.05821 | 25.75309 | 23.50769  | 39.74804 | 37.87995 | 30.24362  | 21.5778  | 41.97858  | 107.4668  | 62.5257  | 50.75942  | 0.483791 | 0.28041  | 0.38379  | 0.411553 | 1.517168 | 0.000558   |
| AT5G17230 | PSY1      | 2765.391 | 3133.136 | 2975.769 | 1743.281  | 1614.433 | 1563.046 | 1903.999  | 1882.663 | 1683.048  | 2912.191  | 3009.215 | 3258.962  | -0.84203 | 9.28E-17 | -0.69189 | 1.77E-11 | 0.049459 | 0.841727</ |



|           |           |           |          |          |          |          |          |           |          |          |          |          |          |          |          |          |          |          |          |
|-----------|-----------|-----------|----------|----------|----------|----------|----------|-----------|----------|----------|----------|----------|----------|----------|----------|----------|----------|----------|----------|
| AT5G18633 | AT5G18633 | 7.133424  | 3.568492 | 6.438272 | 0.412416 | 1.324935 | 3.987363 | 9.782338  | 6.47334  | 1.952492 | 5.757214 | 5.321336 | 12.43088 | -1.10379 | 0.079705 | 0.054742 | 0.948781 | 0.32083  | NA       |
| AT5G18636 | AT5G18636 | 5.94452   | 0        | 1.287654 | 1.649662 | 2.649869 | 3.987363 | 3.557214  | 2.15778  | 0.976246 | 6.716749 | 6.65167  | 5.179533 | -0.03976 | 0.962899 | -0.13576 | 0.877207 | 0.781525 | NA       |
| AT5G18640 | AT5G18640 | 361.4268  | 460.3355 | 426.2136 | 367.4623 | 357.0699 | 429.6384 | 397.5187  | 438.0293 | 358.2823 | 443.3055 | 332.5835 | 398.824  | -0.11029 | 0.578021 | -0.05917 | 0.796279 | -0.0773  | 0.838515 |
| AT5G18650 | AT5G18650 | 709.7757  | 747.5991 | 723.6617 | 759.2571 | 929.4416 | 781.5232 | 959.5585  | 856.6386 | 758.5431 | 662.0796 | 780.906  | 683.6983 | 0.177915 | 0.259754 | 0.23759  | 0.135364 | -0.03704 | 0.917771 |
| AT5G18660 | DVR       | 1206.738  | 1218.64  | 1227.135 | 609.9626 | 667.767  | 696.7917 | 787.2929  | 897.6364 | 1058.251 | 1645.604 | 1873.11  | 1552.824 | -0.87826 | 3.24E-11 | -0.40778 | 0.004596 | 0.466975 | 0.00693  |
| AT5G18661 | AT5G18661 | 0         | 0        | 0        | 0        | 0.662467 | 0.996841 | 0.8899303 | 0        | 0        | 0        | 1.330334 | 0        | 0.267029 | NA       | 0.151034 | NA       | 0.19832  | NA       |
| AT5G18670 | BAM9      | 273.4479  | 230.1677 | 187.9975 | 125.3743 | 104.6698 | 137.564  | 80.92662  | 64.7334  | 72.2422  | 211.0978 | 164.9614 | 193.7145 | -0.89423 | 3.56E-06 | -1.61176 | 6.7E-16  | -0.26893 | 0.436537 |
| AT5G18680 | TULP1     | 306.7372  | 297.9691 | 323.2012 | 372.3066 | 363.8469 | 383.2898 | 415.3726  | 364.1398 | 304.1027 | 280.1978 | 267.3971 | 306.6283 | 0.172988 | 0.270005 | 0.318506 | 0.035685 | -0.07671 | 0.808921 |
| AT5G18690 | AGP25     | 47.55616  | 26.76369 | 29.61605 | 26.80701 | 33.78583 | 17.94313 | 9.782338  | 17.26224 | 22.45366 | 40.3005  | 33.25835 | 36.25673 | -0.36568 | 0.364743 | -0.98391 | 0.012402 | 0.061198 | 0.949258 |
| AT5G18700 | RUK       | 305.5483  | 217.678  | 227.9148 | 120.4253 | 130.5061 | 127.9596 | 162.7425  | 172.6224 | 94.69586 | 229.329  | 280.7005 | 224.7917 | -0.96138 | 1.28E-05 | -0.78208 | 0.000672 | -0.03808 | 0.949608 |
| AT5G18710 | AT5G18710 | 8.322328  | 1.784246 | 6.438272 | 3.71174  | 3.312336 | 3.987363 | 0         | 3.23667  | 0.976246 | 5.995356 | 6.65167  | 6.215439 | -0.4509  | 0.511122 | -1.18282 | 0.703747 | 0.304418 | NA       |
| AT5G18720 | AT5G18720 | 0         | 0        | 1.287654 | 1.237247 | 1.987402 | 0        | 0.889930  | 2.15778  | 1.952492 | 0.995936 | 1.330334 | 2.071813 | 0.304411 | 0.679963 | 0.517442 | 0.472959 | 0.432987 | NA       |
| AT5G18730 | AT5G18730 | 10.70014  | 24.97944 | 11.58889 | 18.97112 | 14.57428 | 12.95893 | 12.45025  | 10.7889  | 8.786214 | 16.31211 | 10.64267 | 12.43088 | 0.065461 | 0.910621 | -0.4207  | 0.441893 | -0.15766 | NA       |
| AT5G18740 | AT5G18740 | 2.377808  | 1.736984 | 1.287654 | 2.062078 | 3.974804 | 4.984204 | 1.778607  | 1.07889  | 3.904984 | 2.878607 | 3.991002 | 6.215439 | 0.042284 | 0.960373 | -0.31831 | 0.692642 | 0.242385 | NA       |
| AT5G18748 | AT5G18748 | 0         | 0        | 0        | 0        | 0        | 0        | 0         | 0        | 0        | 0        | 0        | 0        | NA       | NA       | NA       | NA       | NA       | NA       |
| AT5G18750 | AT5G18750 | 110.5681  | 74.93833 | 96.57408 | 123.7247 | 123.2189 | 130.5861 | 110.2736  | 152.1235 | 117.1495 | 85.39867 | 71.83803 | 81.83662 | 0.388671 | 0.07941  | 0.393351 | 0.094019 | -0.2419  | 0.556992 |
| AT5G18755 | AT5G18755 | 0         | 0        | 0        | 0        | 0        | 0.996841 | 0         | 0        | 0        | 0        | 0        | 0        | 0.15625  | NA       | 0        | NA       | 0        | NA       |
| AT5G18760 | AT5G18760 | 363.8046  | 289.0479 | 382.4333 | 261.0591 | 274.9239 | 238.2449 | 307.699   | 265.4069 | 205.0117 | 410.6812 | 429.6979 | 423.6858 | -0.414   | 0.021182 | -0.40801 | 0.030158 | 0.276199 | 0.332189 |
| AT5G18770 | AT5G18770 | 103.4346  | 123.113  | 109.4506 | 98.15491 | 105.3323 | 95.69671 | 104.0485  | 89.54786 | 80.05217 | 110.3466 | 109.0874 | 84.94434 | -0.1526  | 0.522066 | -0.27632 | 0.249811 | -0.13245 | 0.762198 |
| AT5G18780 | AT5G18780 | 150.9908  | 121.3287 | 110.7383 | 273.8439 | 369.6567 | 328.9575 | 255.2301  | 214.6991 | 184.5105 | 98.83217 | 97.11438 | 87.01615 | 1.301085 | 1.02E-11 | 0.746526 | 0.000307 | -0.42812 | 0.205579 |
| AT5G18790 | AT5G18790 | 36.85602  | 14.27397 | 27.04074 | 40.41673 | 52.99738 | 38.87679 | 35.57214  | 30.20892 | 67.36097 | 56.6126  | 67.84703 | 53.86714 | 0.64542  | 0.083622 | 0.653482 | 0.096835 | 0.137227 | 0.025782 |
| AT5G18800 | AT5G18800 | 286.5259  | 235.2505 | 297.4482 | 448.7081 | 464.3896 | 303.0396 | 35.2674   | 274.038  | 487.1468 | 311.8491 | 413.7339 | 359.4596 | 0.548544 | 0.023527 | 0.401104 | 0.127782 | 0.388355 | 0.318066 |
| AT5G18810 | SC128     | 2.377808  | 1.784246 | 1.287654 | 6.186234 | 7.94607  | 7.974726 | 0.889930  | 2.15778  | 6.833722 | 5.757214 | 5.321336 | 2.071813 | 1.207569 | 0.051993 | 0.380796 | 0.628619 | 0.644258 | NA       |
| AT5G18820 | CPN60A    | 109.3792  | 82.07532 | 108.163  | 117.126  | 121.894  | 111.6462 | 84.48383  | 96.01212 | 88.83839 | 94.99403 | 90.46271 | 109.8601 | 0.209428 | 0.343161 | -0.16793 | 0.507346 | -0.03242 | 0.953003 |
| AT5G18830 | SPL7      | 319.8152  | 240.8732 | 305.1741 | 257.3473 | 249.7502 | 266.1565 | 311.2562  | 301.0103 | 254.8002 | 259.0746 | 300.6555 | 250.6894 | -0.17091 | 0.344616 | -0.00664 | 0.977467 | -0.10683 | 0.752644 |
| AT5G18840 | AT5G18840 | 0         | 3.568492 | 1.287654 | 1.237247 | 1.324935 | 1.993682 | 0         | 1.07889  | 0.976246 | 1.919071 | 1.330334 | 4.146326 | 0.005648 | 0.995041 | -0.37718 | 0.628991 | 0.379705 | NA       |
| AT5G18850 | AT5G18850 | 46.36725  | 51.74313 | 27.04074 | 42.89122 | 37.09817 | 28.90838 | 29.34701  | 29.13003 | 74.1947  | 40.3005  | 65.18636 | 65.76708 | -0.15959 | 0.743803 | 0.08418  | 0.877976 | 0.492631 | 0.461378 |
| AT5G18860 | AT5G18860 | 194.9802  | 187.3458 | 178.984  | 53.20161 | 59.62205 | 71.77254 | 84.48383  | 93.86342 | 42.95482 | 260.9937 | 231.4781 | 184.3914 | -1.55074 | 6.93E-11 | -1.28572 | 1.55E-07 | 0.261732 | 0.558789 |
| AT5G18870 | AT5G18870 | 0         | 0        | 0        | 0        | 0        | 0        | 0         | 0        | 0        | 0        | 0        | 0        | NA       | NA       | NA       | NA       | NA       | NA       |
| AT5G18880 | AT5G18880 | 0         | 0        | 0        | 0        | 0        | 0        | 1.778607  | 0        | 0        | 0        | 1.330334 | 0        | 0        | NA       | 0.264566 | NA       | 0.174671 | NA       |
| AT5G18890 | AT5G18890 | 0         | 0        | 0        | 0.412416 | 0        | 0        | 0.889930  | 0        | 0.976246 | 0.995936 | 0        | 1.035907 | 0.044268 | NA       | 0.349147 | NA       | 0.373578 | NA       |
| AT5G18900 | PAH4      | 216.3805  | 228.3835 | 238.2161 | 316.7352 | 310.6972 | 288.087  | 241.0012  | 282.6692 | 304.5888 | 218.7741 | 223.4961 | 206.1454 | 0.421569 | 0.005121 | 0.27296  | 0.105545 | -0.07432 | 0.835821 |
| AT5G18910 | AT5G18910 | 0         | 1.784246 | 0        | 0        | 0        | 0.996841 | 0         | 0        | 0.976246 | 0        | 0        | 0        | -0.10084 | NA       | -0.07191 | NA       | -0.24963 | NA       |
| AT5G18920 | AT5G18920 | 19.02246  | 12.48972 | 16.73951 | 33.40566 | 45.04777 | 22.92734 | 27.56841  | 26.97225 | 39.04984 | 33.58375 | 43.90102 | 31.0772  | 0.944897 | 0.011324 | 0.818147 | 0.041948 | 1.004139 | 0.048964 |
| AT5G18930 | SAMDCA    | 34.47821  | 21.41095 | 25.75309 | 12.37247 | 13.91181 | 11.96209 | 5.335821  | 8.63112  | 6.833722 | 26.867   | 15.96401 | 16.5745  | -0.99197 | 0.01216  | -1.71051 | 5.74E-05 | -0.41338 | 0.567267 |
| AT5G18940 | AT5G18940 | 464.8614  | 501.3731 | 454.542  | 374.0609 | 567.7345 | 541.2845 | 630.5162  | 462.8438 | 571.1339 | 568.0451 | 462.9562 | 513.8096 | 0.057351 | 0.817523 | 0.225467 | 0.310565 | 0.120754 | 0.76249  |
| AT5G18950 | AT5G18950 | 55.87849  | 71.36984 | 56.65679 | 49.90228 | 59.62205 | 50.83888 | 45.35448  | 74.44341 | 69.31047 | 49.93632 | 67.84703 | 52.83123 | -0.17657 | 0.579779 | 0.044432 | 0.907836 | -0.10956 | 0.863358 |
| AT5G18960 | FRS12     | 284.148   | 235.5205 | 230.7743 | 144.3455 | 108.6446 | 170.4598 | 168.0784  | 200.6735 | 125.9357 | 210.1383 | 166.2917 | 211.3249 | -0.75552 | 0.000846 | -0.53434 | 0.028201 | -0.2891  | 0.473723 |
| AT5G18970 | AT5G18970 | 68.95643  | 55.31163 | 74.68395 | 63.09598 | 74.19633 | 38.87679 | 44.46517  | 44.23449 | 79.07593 | 66.20796 | 69.17737 | 83.90843 | -0.1561  | 0.67384  | -0.23882 | 0.52771  | 0.124419 | 0.85825  |
| AT5G18980 | AT5G18980 | 184.2801  | 180.2088 | 167.3951 | 155.8931 | 147.7302 | 173.4503 | 160.9639  | 199.5946 | 135.6982 | 160.2424 | 166.2917 | 155.386  | -0.1586  | 0.450863 | -0.10068 | 0.673926 | -0.14008 | 0.706832 |
| AT5G18990 | PMESS     | 0         | 0        | 0        | 1.324935 | 0        | 0        | 0         | 0        | 0        | 0        | 0        | 0        | 0.21675  | NA       | 0        | NA       | 0        | NA       |
| AT5G19000 | BPM1      | 217.5694  | 246.226  | 200.8741 | 286.2164 | 258.3622 | 233.2607 | 220.5473  | 250.3025 | 243.0853 | 177.5141 | 151.6581 | 187.4991 | 0.237943 | 0.176643 | 0.106531 | 0.616292 | -0.34413 | 0.184178 |
| AT5G19010 | MPK16     | 905.9448  | 847.5169 | 770.0173 | 634.2952 | 643.2557 | 653.9276 | 787.9229  | 799.4574 | 599.415  | 865.5011 | 933.8944 | 794.5403 | -0.38121 | 0.009277 | -0.20406 | 0.219378 | 0.038014 | 0.915822 |
| AT5G19015 | AT5G19015 | 0         | 0        | 0        | 0        | 0        | 0        | 0         | 0        | 0        | 0        | 0        | 0        | 0        | NA       | 0        | NA       | 0        | NA       |
| AT5G19020 | PCMP-E42  | 39.23383  | 35.68492 | 41.20494 | 44.9533  | 37.76063 | 73.76622 | 47.13308  | 61.49673 | 53.69353 | 31.66468 | 35.91902 | 35.22082 | 0.367807 | 0.275951 | 0.442654 | 0.207962 | -0.17361 | 0.803834 |
| AT5G19025 | AT5G19025 | 28.53369  | 23.1952  | 37.34198 | 31.34358 | 25.17376 | 30.90206 | 33.79953  | 26.97225 | 21.47741 | 34.54328 | 50.55269 | 22.78994 | -0.03953 | 0.934985 | -0.11587 | 0.814634 | 0.220111 | 0.767306 |
| AT5G19030 | AT5G19030 | 47.55616  | 5.095887 | 29.61605 | 86.67027 | 77.50867 | 59.81045 | 52.46891  | 42.07671 | 112.2683 | 71.00564 | 53.21336 | 54.90305 | 0.693786 | 0.057047 | 0.579581 | 0.141152 | 0.391586 | 0.546902 |
| AT5G19040 | IPT5      | 1.188904  | 3.568492 | 1.287654 | 3.299325 | 1.987402 | 1.993682 | 6.251214  | 3.23667  | 4.88123  | 2.878607 | 3.991002 | 2.071813 | 0.17307  | 0.830358 | 0.793645 | 0.260438 | 0.311041 | NA       |
| AT5G19050 | AT5G19050 | 160.502   | 181.9931 | 158.3815 | 228.8906 | 210.6646 | 245.2228 | 246.3371  | 248.1447 | 205.0117 | 410.0922 | 118.3997 | 165.745  | 0.445539 | 0.0126   | 0.478048 | 0.009552 | -0.22095 | 0.507006 |
| AT5G19060 | AT5G19060 | 26.15589  | 26.76369 | 39.31482 | 12.37247 | 9.274542 | 7.974726 | 11.56095  | 17.26224 | 9.76246  | 32.62421 | 26.60668 | 27.75404 | -1.08937 | 0.006126 | -0.80147 | 0.066138 | 0.167865 | 0.84885  |
| AT5G19070 | AT5G19070 | 170.14703 | 62.44861 | 83.69753 | 111.3522 | 90.75802 | 95.69671 | 91.59826  | 97.10009 | 92.10508 | 76.76285 | 70.5077  | 72.51346 | 0.446529 | 0.04424  | 0.403419 | 0.094048 | 0.013733 | 0.988314 |
| AT5G19080 | LUL3      | 102.2457  | 82.07532 | 68.24568 | 73.82239 | 105.9948 | 100.6809 | 103       |          |          |          |          |          |          |          |          |          |          |          |

|           |           |          |          |          |          |          |          |          |          |          |           |          |          |           |          |           |           |           |          |
|-----------|-----------|----------|----------|----------|----------|----------|----------|----------|----------|----------|-----------|----------|----------|-----------|----------|-----------|-----------|-----------|----------|
| AT5G19510 | AT5G19510 | 1846.368 | 1962.671 | 2096.301 | 2274.884 | 2276.9   | 2082.4   | 1682.562 | 1849.217 | 2136.026 | 2089.869  | 2067.339 | 1569.398 | 0.166067  | 0.318557 | -0.05844  | 0.772628  | -0.04394  | 0.901453 |
| AT5G19520 | MS19      | 2.377808 | 3.568492 | 3.862693 | 16.08421 | 9.937009 | 19.93682 | 14.22886 | 11.86779 | 4.88123  | 0         | 1.330334 | 2.071813 | 1.665078  | 0.002519 | 1.175608  | 0.052094  | -0.69515  | 0.612498 |
| AT5G19530 | ACL5      | 449.4057 | 303.3218 | 377.2827 | 243.2352 | 223.2515 | 233.2607 | 187.3027 | 203.9102 | 193.2967 | 372.2998  | 353.8688 | 282.8025 | -0.68344  | 6.45E-05 | -0.95159  | 3.18E-08  | -0.16802  | 0.121498 |
| AT5G19540 | AT5G19540 | 958.2566 | 1141.917 | 1053.301 | 1064.032 | 1020.2   | 1118.455 | 1510.037 | 1515.84  | 1468.274 | 1185.986  | 1205.283 | 1286.596 | 0.024176  | 0.865948 | 0.510593  | 7.97E-07  | 0.223619  | 0.168441 |
| AT5G19550 | ASP2      | 514.7954 | 508.5101 | 531.8012 | 729.5632 | 735.3387 | 640.9686 | 613.6194 | 610.6517 | 630.6549 | 465.3748  | 453.6439 | 441.2962 | 0.436831  | 8.81E-05 | 0.251276  | 0.043162  | -0.19199  | 0.319156 |
| AT5G19560 | ROPGEF10  | 0        | 1.784246 | 1.287654 | 0.824831 | 0        | 1.324935 | 0        | 0        | 0.972646 | 0.959536  | 3.991002 | 0        | -0.09626  | 0.903585 | -0.31704  | 0.0651372 | 0.241812  | NA       |
| AT5G19570 | AT5G19570 | 51.12287 | 57.09587 | 65.67037 | 77.12171 | 81.48347 | 46.85152 | 40.90796 | 32.3667  | 91.76712 | 51.81492  | 59.86503 | 59.04667 | 0.23477   | 0.566275 | -0.06701  | 0.089172  | -0.02605  | 0.979707 |
| AT5G19580 | AT5G19580 | 30.9115  | 32.11643 | 30.9037  | 10.7228  | 8.612075 | 16.94629 | 16.00746 | 10.7889  | 14.64369 | 24.94793  | 17.29434 | 15.5386  | -1.24757  | 0.000601 | -1.04677  | 0.009024  | -0.62134  | 0.310619 |
| AT5G19590 | AT5G19590 | 693.131  | 681.582  | 706.9222 | 1161.775 | 1393.169 | 1000.828 | 763.0224 | 732.5663 | 1279.858 | 795.455   | 989.7685 | 652.6211 | 0.745948  | 0.001004 | 0.400126  | 0.114389  | 0.218283  | 0.612836 |
| AT5G19600 | SULTR3    | 68.95643 | 28.54794 | 51.50617 | 25.56977 | 29.81103 | 32.89575 | 39.12935 | 39.91893 | 43.93107 | 70.0461   | 55.87403 | 54.90305 | -0.76265  | 0.012632 | -0.29377  | 0.42172   | 0.236308  | 0.685976 |
| AT5G19610 | GNL2      | 0        | 0        | 0        | 0        | 0        | 1.324935 | 1.993682 | 0        | 0        | 0         | 1.330334 | 0        | 0.500309  | NA       | 0         | NA        | 0.87763   | NA       |
| AT5G19620 | OEPR0     | 379.2604 | 321.1643 | 357.9679 | 278.7929 | 219.9391 | 270.1439 | 261.4552 | 297.7736 | 241.1328 | 355.9877  | 301.9858 | 342.8851 | -0.45674  | 0.004445 | -0.40202  | 0.017892  | -0.08036  | 0.821978 |
| AT5G19630 | AT5G19630 | 82.03437 | 87.42806 | 90.1358  | 113.8267 | 91.42048 | 105.6651 | 72.92289 | 97.10009 | 93.71962 | 87.31174  | 94.45371 | 94.26749 | 0.259465  | 0.264786 | 0.018289  | 0.953578  | 0.08517   | 0.866496 |
| AT5G19640 | NPF7.1    | 0        | 0        | 0        | 0        | 0        | 0        | 0        | 0        | 0        | 0         | 0        | 0        | #N/A      | #N/A     | #N/A      | #N/A      | #N/A      | #N/A     |
| AT5G19650 | OPF8      | 4.755616 | 5.352738 | 7.725926 | 5.773818 | 9.937009 | 9.968408 | 4.446517 | 1.07889  | 7.809968 | 11.51443  | 11.97301 | 8.287252 | 0.365205  | 0.565786 | -0.29367  | 0.685511  | 0.632148  | NA       |
| AT5G19660 | SBT6.1    | 196.1692 | 303.3218 | 199.5864 | 174.4518 | 162.3045 | 207.3429 | 196.5361 | 211.6424 | 151.3181 | 177.5141  | 183.5861 | 191.6427 | -0.34478  | 0.119175 | -0.30103  | 0.207873  | -0.31688  | 0.365332 |
| AT5G19670 | AT5G19670 | 124.8349 | 87.42806 | 99.14938 | 68.04857 | 64.92179 | 74.76306 | 66.69776 | 75.5223  | 62.47974 | 92.11542  | 78.4897  | 95.3034  | -0.58713  | 0.006785 | -0.60209  | 0.008998  | -0.22805  | 0.573562 |
| AT5G19680 | AT5G19680 | 296.0371 | 337.2212 | 356.6803 | 391.3824 | 459.0898 | 456.5531 | 499.881  | 375.4537 | 378.7384 | 328.1162  | 348.5475 | 336.6696 | 0.393543  | 0.006409 | -0.26369  | 0.0099512 | 0.034111  | 0.927039 |
| AT5G19690 | STT3A     | 1072.391 | 975.9826 | 981.1926 | 1203.016 | 1066.572 | 1271.969 | 1039.596 | 1117.73  | 733.1607 | 847.27    | 832.7891 | 835.9766 | 0.220308  | 0.215483 | -0.06758  | 0.759144  | -0.26381  | 0.318906 |
| AT5G19700 | AT5G19700 | 2.377808 | 0        | 0        | 0        | 0        | 0        | 0.889303 | 0        | 0        | 0         | 0        | 1.035907 | -0.41552  | NA       | -0.22014  | NA        | -0.19775  | NA       |
| AT5G19710 | AT5G19710 | 0        | 0        | 0        | 0        | 0.662467 | 0        | 0        | 0        | 0        | 0         | 0        | 0        | 0.128567  | NA       | 0         | NA        | 0         | NA       |
| AT5G19720 | AT5G19720 | 0        | 0        | 0        | 0        | 1.324935 | 0.996841 | 0        | 1.07889  | 0.976246 | 0.959536  | 0        | 0        | 0.378805  | NA       | 0.334197  | NA        | 0.164369  | NA       |
| AT5G19729 | AT5G19729 | 0        | 0        | 0        | 0        | 0.996841 | 0        | 0        | 0        | 0        | 0         | 0        | 0        | 0.15625   | NA       | 0         | NA        | 0         | NA       |
| AT5G19730 | PME53     | 53.50068 | 53.52738 | 56.65679 | 32.99325 | 31.13596 | 31.8989  | 17.78607 | 20.49891 | 14.64369 | 74.84378  | 46.56169 | 52.83123 | -0.72481  | 0.011583 | -1.51135  | 8.13E-07  | 0.101955  | 0.877489 |
| AT5G19740 | AT5G19740 | 171.2022 | 148.0924 | 162.2444 | 61.03751 | 58.95959 | 63.79781 | 104.9378 | 103.5734 | 83.95716 | 189.9881  | 158.3097 | 152.2783 | -1.36396  | 6.62E-14 | -0.7074   | 0.00023   | 0.053808  | 0.90444  |
| AT5G19750 | AT5G19750 | 265.1256 | 328.3013 | 283.284  | 447.4709 | 493.5381 | 406.711  | 313.9241 | 289.1425 | 312.3987 | 328.1612  | 336.5745 | 291.0897 | 0.622573  | 1.15E-05 | -0.069873 | 0.7291    | 0.128729  | 0.661433 |
| AT5G19760 | DTG       | 2079.393 | 2210.681 | 2383.448 | 1864.943 | 1853.583 | 1698.617 | 1680.784 | 1633.439 | 2018.877 | 2573.475  | 2431.85  | 219.2923 | -0.2969   | 0.022456 | -0.31988  | 0.016081  | 0.109455  | 0.654642 |
| AT5G19770 | TUBA5     | 2738.046 | 2663.879 | 2540.542 | 1585.738 | 1591.909 | 1796.307 | 1520.709 | 1772.616 | 1980.803 | 2285.614  | 2266.889 | 2239.63  | -0.66989  | 8.37E-09 | -0.58525  | 7.69E-07  | -0.2235   | 0.242778 |
| AT5G19780 | TUBA5     | 2399.208 | 2189.27  | 2076.986 | 1447.991 | 1386.544 | 1686.655 | 1447.786 | 1822.245 | 1881.226 | 2031.337  | 1946.279 | 1923.678 | -0.5547   | 3.73E-05 | -0.3679   | 0.010313  | -0.17363  | 0.475665 |
| AT5G19790 | RAP2-11   | 1.188904 | 3.568492 | 0        | 0.24831  | 0.662467 | 0.996841 | 0.889303 | 1.07889  | 0.976246 | 0         | 0        | 0        | -0.26128  | 0.719089 | -0.1809   | 0.816687  | -0.74899  | NA       |
| AT5G19800 | AT5G19800 | 0        | 0        | 0        | 0        | 0        | 0        | 0        | 0        | 0        | 0         | 0        | 0        | #N/A      | #N/A     | #N/A      | #N/A      | #N/A      | #N/A     |
| AT5G19810 | AT5G19810 | 0        | 0        | 2.575309 | 0        | 0        | 0        | 0        | 0        | 0        | 0.959536  | 1.330334 | 0        | -0.47525  | NA       | -0.43718  | NA        | -0.04288  | NA       |
| AT5G19820 | emb2734   | 1458.785 | 1129.428 | 1174.341 | 649.1421 | 586.2835 | 765.5737 | 819.9378 | 946.1865 | 705.8259 | 1006.553  | 973.8045 | 1080.451 | -0.89907  | 6.81E-09 | -0.59754  | 0.000235  | -0.29378  | 0.252117 |
| AT5G19830 | AT5G19830 | 19.02246 | 26.76369 | 20.60247 | 28.86909 | 27.82363 | 35.88627 | 32.90423 | 24.81447 | 26.35864 | 22.06932  | 17.29434 | 20.71813 | 0.449235  | 0.226233 | 0.3397    | 0.421028  | -0.09941  | 0.911596 |
| AT5G19840 | AT5G19840 | 92.73451 | 58.88012 | 75.97161 | 120.8378 | 103.3449 | 84.73147 | 84.48383 | 101.4157 | 65.40848 | 66.20796  | 67.84703 | 59.04667 | 0.421218  | 0.109294 | 0.11634   | 0.732219  | -0.24566  | 0.618993 |
| AT5G19850 | AT5G19850 | 142.6685 | 119.5445 | 106.8753 | 139.3965 | 135.8058 | 120.6177 | 132.5062 | 108.9679 | 115.197  | 130.9688  | 102.4357 | 162.6733 | 0.10033   | 0.705023 | -0.04917  | 0.87239   | 0.101152  | 0.836577 |
| AT5G19855 | AT5G19855 | 670.5418 | 822.5374 | 81.7742  | 712.2417 | 730.0389 | 701.7759 | 857.2886 | 841.5342 | 778.0681 | 971.0501  | 1142.757 | 802.8276 | -0.13752  | 0.453621 | -0.067214 | 0.571369  | 0.297436  | 0.229092 |
| AT5G19860 | AT5G19860 | 752.5762 | 699.4244 | 700.484  | 840.5029 | 977.8017 | 690.8107 | 800.3731 | 668.9118 | 1116.825 | 758.6269  | 1194.64  | 626.7235 | 0.212683  | 0.495889 | 0.253878  | 0.389214  | 0.244089  | 0.595343 |
| AT5G19870 | AT5G19870 | 7.133424 | 5.352738 | 9.01358  | 2.062078 | 1.324935 | 0.996841 | 1.07889  | 0.976246 | 0.959536 | 6.65167   | 10.35907 | 0        | -1.44144  | 0.017394 | -1.61655  | 0.009922  | -0.02769  | NA       |
| AT5G19875 | AT5G19875 | 16.64466 | 16.05821 | 9.01358  | 59.80026 | 51.00998 | 42.86415 | 16.00746 | 14.02557 | 18.54867 | 18.23118  | 21.28534 | 9.323159 | 1.737365  | 1.66E-06 | 0.187386  | 0.731689  | 0.17738   | 0.852376 |
| AT5G19880 | PER58     | 0        | 0        | 0        | 6.598649 | 8.612075 | 6.977885 | 8.003731 | 6.47334  | 11.71495 | 0.959536  | 0        | 0        | -2.073233 | 0.000467 | 2.23904   | 0.00018   | 0.053971  | NA       |
| AT5G19890 | PER59     | 0        | 0        | 0        | 0.824831 | 0        | 0        | 0        | 0        | 0        | 0         | 0        | 0        | 0.173038  | NA       | 0         | NA        | 0         | NA       |
| AT5G19900 | AT5G19900 | 322.193  | 271.2054 | 215.0383 | 193.8353 | 192.778  | 218.3081 | 197.4254 | 236.2769 | 259.6814 | 197.6643  | 186.2468 | 207.1813 | -0.41494  | 0.027648 | -0.21935  | 0.310565  | -0.44097  | 0.099471 |
| AT5G19910 | MED31     | 87.97889 | 51.74313 | 83.69753 | 79.18379 | 95.39529 | 68.78201 | 70.12785 | 72.92289 | 73.21845 | 68.12703  | 94.45371 | 75.62118 | 0.102478  | 0.741069 | -0.0678   | 0.846852  | -0.055082 | 0.93137  |
| AT5G19920 | AT5G19920 | 99.86793 | 73.15409 | 81.12222 | 71.34789 | 66.24673 | 63.79781 | 55.6903  | 53.9445  | 50.76497 | 47.97678  | 51.88302 | 80.80771 | -0.32534  | 0.22637  | -0.69042  | 0.009387  | -0.47807  | 0.227791 |
| AT5G19930 | AT5G19930 | 86.78999 | 117.7602 | 99.14938 | 191.3608 | 204.0399 | 193.3871 | 151.1816 | 141.3346 | 140.5794 | 191.15588 | 65.18636 | 82.87252 | 0.950813  | 1.07E-07 | 0.156094  | 0.010269  | -0.30496  | 0.378088 |
| AT5G19940 | PAP8      | 5175.299 | 6137.806 | 5872.991 | 3159.928 | 3444.167 | 3004.478 | 2995.174 | 2918.397 | 3814.193 | 6972.945  | 7399.318 | 6076.628 | -0.82682  | 1.69E-09 | -0.8094   | 0.434E-09 | 0.247576  | 0.282809 |
| AT5G19950 | AT5G19950 | 84.41218 | 87.42806 | 79.83457 | 118.3633 | 108.6446 | 97.9004  | 90.92662 | 94.94231 | 108.3633 | 78.68192  | 49.22236 | 56.97488 | 0.369027  | 0.142739 | 0.17023   | 0.556726  | -0.4087   | 0.29285  |
| AT5G19960 | AT5G19960 | 79.65566 | 67.80135 | 73.3963  | 111.3522 | 102.6824 | 103.6714 | 98.71269 | 91.70564 | 163.0331 | 57.52714  | 83.81104 | 71.47755 | 0.497718  | 0.063747 | 0.643229  | 0.017451  | -0.06729  | 0.920201 |
| AT5G19970 | AT5G19970 | 11.88904 | 14.27397 | 15.45185 | 8.939794 | 9.937009 | 13.95577 | 8.939305 | 5.39445  | 4.88123  | 15.35257  | 6.65167  | 15.5386  | -0.26923  | 0.625145 | -0.88451  | 0.095453  | -0.0876   | NA       |
| AT5G19980 | GON5T4    | 212.8138 | 205.1883 | 190.5728 | 293.2275 | 273.599  | 255.1912 | 177.8607 | 201.7524 | 171.8193 | 151.6066  | 170.2827 | 128.4524 | 0.432847  | 0.600245 | -0.432847 | 0.494159  | -0.43212  | 0.073405 |
| AT5G19990 | RPT6A     | 670.5299 | 679.7977 | 656.7037 | 700.6941 | 677.7996 | 739.6559 | 715      | 684.0162 | 878.6214 | 663.9031  | 661.176  | 781.0735 | 0.182338  | 0.240796 | 0.227558  |           |           |          |

|           |           |          |          |          |          |          |          |          |          |          |          |          |          |          |           |          |          |          |          |
|-----------|-----------|----------|----------|----------|----------|----------|----------|----------|----------|----------|----------|----------|----------|----------|-----------|----------|----------|----------|----------|
| ATSG20490 | XIK       | 1059.313 | 843.9484 | 772.5926 | 328.6952 | 262.337  | 471.5057 | 500.6779 | 606.3361 | 299.7075 | 756.1141 | 771.5937 | 766.5708 | -1.27911 | 1.36E-07  | -0.8887  | 0.000453 | -0.21307 | 0.664315 |
| ATSG20500 | GRXC4     | 433.9499 | 381.8287 | 484.158  | 771.6295 | 749.913  | 633.9907 | 516.6853 | 496.2894 | 795.6405 | 525.8255 | 787.5577 | 677.4829 | 0.706376 | 0.000867  | 0.459339 | 0.046116 | 0.591717 | 0.039616 |
| ATSG20510 | ALS       | 51.12287 | 73.15409 | 64.38272 | 86.19486 | 103.3449 | 77.75358 | 59.15547 | 93.86342 | 104.4583 | 79.64146 | 66.5167  | 78.7289  | 0.507196 | 0.001318  | 0.631936 | 0.008448 | 0.26652  | 0.540551 |
| ATSG20520 | WAV2      | 583.7518 | 474.6094 | 552.4037 | 447.0585 | 479.6263 | 483.4678 | 518.4639 | 558.865  | 613.0825 | 476.8892 | 492.2236 | 486.8761 | -0.19781 | 0.155777  | 0.062887 | 0.715404 | -0.15015 | 0.52809  |
| ATSG20540 | BRXL4     | 90.3567  | 39.25341 | 60.51975 | 63.512   | 56.30972 | 49.84204 | 46.24378 | 51.78672 | 40.02609 | 54.69353 | 58.53469 | 54.07103 | -0.17097 | 0.1610536 | -0.46693 | 0.146143 | -0.19871 | 0.734334 |
| ATSG20550 | ATSG20550 | 2.377808 | 3.568492 | 1.287654 | 5.361402 | 4.637271 | 5.981045 | 3.557214 | 0.0      | 0.0      | 0.0      | 0.0      | 0.0      | 0.767744 | 0.26346   | -0.40013 | 0.166203 | -0.32476 | NA       |
| ATSG20560 | ATSG20560 | 0        | 0        | 0        | 0        | 0        | 0        | 0        | 0        | 0        | 0        | 0        | 0        | #N/A     | #N/A      | #N/A     | #N/A     | #N/A     | #N/A     |
| ATSG20570 | RBX1A     | 173.58   | 158.7979 | 181.5593 | 315.9103 | 296.7853 | 236.2513 | 241.0012 | 179.0957 | 351.4486 | 143.9303 | 180.9254 | 197.8581 | 0.697978 | 0.003757  | 0.561693 | 0.028106 | 0.018496 | 0.979708 |
| ATSG20580 | ATSG20580 | 141.4796 | 119.5445 | 131.3407 | 188.4739 | 164.9544 | 201.3618 | 165.4104 | 157.5179 | 137.6507 | 187.1094 | 186.2468 | 126.3806 | 0.47735  | 0.019489  | 0.218398 | 0.370896 | 0.329693 | 0.319931 |
| ATSG20590 | TBL5      | 187.8468 | 164.1506 | 193.1482 | 183.1125 | 152.3675 | 149.5261 | 154.7388 | 162.9124 | 139.6032 | 132.4159 | 190.2378 | 171.9605 | -0.16115 | 0.461835  | -0.25379 | 0.250307 | -0.15023 | 0.694094 |
| ATSG20600 | ATSG20600 | 292.4704 | 312.2431 | 256.2432 | 184.7622 | 206.0273 | 188.4029 | 224.9938 | 252.4602 | 266.5152 | 255.2365 | 236.7994 | 252.7612 | -0.55986 | 0.000135  | -0.20423 | 0.239081 | -0.19901 | 0.453238 |
| ATSG20610 | ATSG20610 | 387.5827 | 328.3013 | 280.7086 | 185.1746 | 166.2793 | 241.2355 | 200.9826 | 261.0914 | 215.7504 | 218.7741 | 246.1118 | 223.7558 | -0.74224 | 0.764E-05 | -0.54607 | 0.006144 | -0.52358 | 0.046832 |
| ATSG20620 | UBQ4      | 571.8628 | 603.0752 | 632.2383 | 759.6695 | 815.4972 | 704.7664 | 715      | 700.1996 | 786.8543 | 644.8079 | 599.9806 | 652.6211 | 0.33462  | 0.005142  | 0.283108 | 0.025556 | 0.071515 | 0.781547 |
| ATSG20630 | GER3      | 1710.833 | 1516.609 | 1473.077 | 1490.057 | 1466.04  | 1681.67  | 3437.158 | 3512.866 | 4984.712 | 1875.892 | 1653.605 | 1921.607 | -0.02044 | 0.928927  | 1.320349 | 4.2E-18  | 0.209817 | 0.468917 |
| ATSG20635 | GG3       | 35.66712 | 35.68492 | 32.19136 | 37.94223 | 34.4483  | 21.9305  | 23.12189 | 32.3667  | 21.47741 | 35.50282 | 43.90102 | 46.61579 | -0.08728 | 0.833784  | -0.40122 | 0.300984 | 0.263443 | 0.676985 |
| ATSG20640 | ATSG20640 | 2.377808 | 5.352738 | 1.287654 | 1.649662 | 3.974804 | 0.996841 | 3.557214 | 1.07889  | 2.928738 | 8.635821 | 2.660668 | 7.251346 | -0.22215 | 0.779631  | -0.09165 | 0.916896 | 0.750652 | NA       |
| ATSG20650 | COPT5     | 252.0476 | 351.4965 | 316.763  | 338.5932 | 330.5712 | 282.1059 | 224.1045 | 263.2491 | 429.5482 | 347.3519 | 357.8598 | 252.7612 | 0.051672 | 0.873144  | -0.00197 | 0.995579 | 0.05802  | 0.924762 |
| ATSG20660 | ATSG20660 | 681.2422 | 553.1163 | 571.7185 | 478.4021 | 460.4148 | 519.354  | 545.1143 | 599.8628 | 435.4057 | 519.1088 | 468.2776 | 556.2818 | -0.3082  | 0.061822  | -0.19276 | 0.297046 | -0.22382 | 0.407216 |
| ATSG20670 | ATSG20670 | 23.77808 | 21.41095 | 20.60247 | 5.361402 | 3.974804 | 4.984204 | 5.335821 | 6.47334  | 13.66744 | 20.15025 | 18.62468 | 30.04129 | -1.83418 | 2.51E-05  | -1.17364 | 0.011773 | 0.07325  | NA       |
| ATSG20680 | TBL16     | 164.0687 | 133.8185 | 155.8062 | 170.3276 | 132.4935 | 171.4566 | 156.5174 | 189.8846 | 122.0307 | 146.809  | 122.3907 | 131.5601 | 0.054987 | 0.84056   | 0.054581 | 0.905713 | -0.17637 | 0.675201 |
| ATSG20690 | PKR6      | 0        | 1.784246 | 1.287654 | 0        | 0.662467 | 0        | 1.778607 | 0        | 0.972646 | 0        | 0        | 0        | -0.39762 | NA        | 0.026963 | NA       | -0.49342 | NA       |
| ATSG20700 | ATSG20700 | 2399.208 | 2285.619 | 2316.49  | 1747.405 | 1453.453 | 1540.119 | 1220.124 | 1246.118 | 1310.122 | 2727.96  | 2760.443 | 2334.933 | -0.55636 | 8.26E-07  | -0.88282 | 1.5E-15  | 0.158163 | 0.434113 |
| ATSG20710 | BGAL7     | 9.511232 | 8.92123  | 10.30123 | 0.824831 | 0.662467 | 2.990522 | 1.778607 | 1.07889  | 1.952492 | 18.23118 | 9.312338 | 20.71813 | -1.93057 | 0.000533  | -1.66463 | 0.004614 | 0.684925 | NA       |
| ATSG20720 | CPN21     | 2566.844 | 2754.876 | 2794.21  | 2949.184 | 2671.068 | 2448.241 | 2082.749 | 2171.805 | 3244.065 | 2920.826 | 2450.475 | 3174.018 | -0.00766 | 0.976016  | -0.11153 | 0.634062 | 0.07325  | 0.862045 |
| ATSG20730 | ARF7      | 388.5735 | 440.7088 | 394.0222 | 329.1076 | 315.3344 | 388.7679 | 465.0016 | 296.7788 | 360.7882 | 476.2596 | 308.7001 |          | -0.40171 | 0.077178  | -0.40171 | 0.041421 | -0.2577  | 0.507006 |
| ATSG20736 | ATSG20736 | 0        | 0        | 0        | 0        | 0        | 0        | 0        | 0        | 0        | 0        | 0        | 0        | #N/A     | #N/A      | #N/A     | #N/A     | #N/A     | #N/A     |
| ATSG20740 | ATSG20740 | 136.724  | 130.25   | 159.6691 | 95.268   | 88.10815 | 56.81992 | 40.90796 | 56.10228 | 74.1947  | 170.7973 | 226.1568 | 127.4165 | -0.77221 | 0.005161  | -1.24822 | 6.35E-06 | 0.77427  | 0.582443 |
| ATSG20750 | ATSG20750 | 0        | 0        | 1.287654 | 0        | 0        | 0        | 1.778607 | 2.15778  | 0        | 0        | 0        | 0        | -0.2994  | NA        | 0.400627 | NA       | -0.24365 | NA       |
| ATSG20760 | ATSG20760 | 0        | 0        | 0        | 0        | 0        | 0        | 0        | 0        | 0        | 0        | 0        | 0        | #N/A     | #N/A      | #N/A     | #N/A     | #N/A     | #N/A     |
| ATSG20770 | ATSG20770 | 0        | 0        | 0        | 0        | 0        | 0        | 1.07889  | 0        | 0        | 0        | 0        | 0        | #N/A     | NA        | 0.16673  | NA       | 0        | NA       |
| ATSG20780 | ATSG20780 | 0        | 0        | 0        | 0        | 0        | 0        | 0        | 0        | 0        | 0        | 0        | 0        | #N/A     | #N/A      | #N/A     | #N/A     | #N/A     | #N/A     |
| ATSG20790 | ATSG20790 | 3.566712 | 3.568492 | 2.575309 | 19.38353 | 16.56168 | 11.96209 | 6.225124 | 10.7889  | 12.6912  | 2.878607 | 1.330334 | 6.215439 | 1.748347 | 0.000921  | 1.150527 | 0.062184 | 0.048302 | NA       |
| ATSG20800 | ATSG20800 | 0        | 0        | 0        | 0        | 0        | 0        | 1.778607 | 0        | 0        | 0        | 0        | 0        | 0        | NA        | 0.26262  | NA       | 0.150298 | NA       |
| ATSG20810 | ATSG20810 | 5.94452  | 1.784246 | 5.150617 | 2.886909 | 1.987402 | 1.993682 | 5.335821 | 1.07889  | 3.904984 | 3.838143 | 2.660668 | 8.287252 | -0.58162 | 0.40099   | -0.21606 | 0.795296 | 0.11932  | NA       |
| ATSG20820 | ATSG20820 | 4.755616 | 8.92123  | 18.02716 | 7.835986 | 9.274542 | 4.984204 | 3.557214 | 6.47334  | 9.76246  | 14.39303 | 18.62468 | 13.46678 | -0.39397 | 0.504359  | -0.53559 | 0.386127 | 0.453562 | NA       |
| ATSG20830 | SUS1      | 303.1705 | 283.6951 | 250.1926 | 382.3092 | 388.8683 | 471.5057 | 615.398  | 599.8628 | 571.1309 | 285.9416 | 258.0848 | 299.1286 | 0.553043 | 0.000121  | 1.077066 | 4.03E-15 | -0.00085 | 0.99816  |
| ATSG20840 | SAC4      | 649.1416 | 517.4313 | 530.5136 | 329.1076 | 363.6945 | 413.6889 | 470.4415 | 488.7371 | 324.1137 | 494.1608 | 508.1876 | 562.7456 | -0.61005 | 0.000778  | -0.39679 | 0.043967 | -0.10994 | 0.778315 |
| ATSG20850 | RAD51     | 30.91155 | 21.41095 | 21.89012 | 32.99325 | 25.83622 | 23.92418 | 22.23259 | 15.10446 | 17.57243 | 27.82653 | 21.28534 | 29.00538 | 0.155355 | 0.720739  | -0.39995 | 0.35823  | 0.063616 | 0.946861 |
| ATSG20852 | ATSG20852 | 0        | 0        | 0        | 0        | 0        | 0        | 0        | 0        | 0        | 0        | 0        | 0        | #N/A     | #N/A      | #N/A     | #N/A     | #N/A     | #N/A     |
| ATSG20854 | ATC2      | 0        | 0        | 0        | 0        | 0        | 0        | 0        | 0        | 0        | 0        | 0        | 0        | #N/A     | #N/A      | #N/A     | #N/A     | #N/A     | #N/A     |
| ATSG20856 | ATSG20856 | 0        | 0        | 0        | 0        | 0        | 0        | 0        | 0        | 0        | 0        | 0        | 0        | #N/A     | #N/A      | #N/A     | #N/A     | #N/A     | #N/A     |
| ATSG20858 | ATSG20858 | 0        | 0        | 0        | 0        | 0        | 0        | 0        | 0        | 0        | 0        | 0        | 0        | #N/A     | #N/A      | #N/A     | #N/A     | #N/A     | #N/A     |
| ATSG20860 | PMES4     | 3.566712 | 0        | 1.287654 | 2.062078 | 1.324935 | 0        | 0.889303 | 1.07889  | 0        | 0.995936 | 2.660668 | 0        | -0.16329 | 0.834354  | -0.4341  | 0.548894 | -0.21008 | NA       |
| ATSG20870 | ATSG20870 | 11.88904 | 8.92123  | 9.01358  | 2.886909 | 1.987402 | 2.990522 | 3.557214 | 4.31556  | 2.928738 | 10.55489 | 13.30334 | 5.179533 | -1.42599 | 0.009583  | -1.09279 | 0.066793 | -0.40259 | NA       |
| ATSG20880 | ATSG20880 | 30.91155 | 21.41095 | 45.0679  | 55.6761  | 54.98478 | 51.83572 | 46.24378 | 34.52448 | 46.85981 | 30.70514 | 27.93701 | 37.29264 | 0.673889 | 0.026096  | 0.341075 | 0.347659 | -0.04296 | 0.960409 |
| ATSG20885 | ATSG20885 | 95.1232  | 71.36984 | 78.54691 | 106.4032 | 95.39529 | 72.76938 | 63.14055 | 66.89118 | 93.71962 | 101.7108 | 127.7121 | 89.08796 | 0.163246 | 0.586348  | -0.13624 | 0.684351 | 0.345508 | 0.425722 |
| ATSG20890 | CTC2      | 1361.295 | 1229.346 | 1156.314 | 1030.214 | 1097.046 | 1108.487 | 891.0821 | 1119.888 | 1216.403 | 1210.934 | 1202.622 | 1094.953 | -0.21023 | 0.166788  | -0.21383 | 0.17978  | -0.09434 | 0.745668 |
| ATSG20900 | TIFY3F    | 788.2433 | 942.0819 | 923.2482 | 1250.032 | 1247.426 | 1229.105 | 1506.48  | 1361.559 | 1315.98  | 996.9575 | 1073.58  | 853.587  | 0.486839 | 0.00013   | 0.652218 | 1.88E-07 | 0.139198 | 0.565661 |
| ATSG20910 | AIP2      | 126.0238 | 137.3869 | 132.6284 | 189.2987 | 198.0777 | 182.4219 | 184.0858 | 193.1213 | 136.6744 | 122.8206 | 159.6401 | 126.3806 | 0.517381 | 0.007029  | 0.36865  | 0.802028 | 0.038891 | 0.939955 |
| ATSG20920 | EMB1401   | 568.2961 | 496.0204 | 504.7605 | 552.2245 | 547.8604 | 563.215  | 536.25   | 572.8906 | 772.1106 | 497.999  | 428.3675 | 607.0412 | 0.080472 | 0.720739  | 0.254718 | 0.20961  | -0.03811 | 0.946773 |
| ATSG20930 | TOUSLED   | 134.3461 | 148.0924 | 159.6691 | 145.1703 | 107.9822 | 165.4756 | 155.6225 | 172.1197 | 158.3234 | 145.0064 | 153.3142 |          | -0.0816  | 0.762928  | -0.02617 | 0.932612 | 0.049521 | 0.928252 |
| ATSG20935 | ATSG20935 | 17.83356 | 35.68492 | 20.60247 | 36.70499 | 28.48609 | 15.94945 | 46.24378 | 31.28781 | 61.5035  | 55.65307 | 74.4987  | 41.43626 | 0.170906 | 0.726203  | 0.843145 | 0.038337 | 1.108998 | 0.025916 |
| ATSG20940 | ATSG20940 | 14.26685 | 5.352738 | 12.87654 | 14.02213 | 18.54908 | 25.91786 | 18.67537 | 17.26224 | 8.786214 | 12.47396 | 10.64267 | 9.321359 | 0.64734  | 0.1819    | 0.338282 | 0.557159 | -0.04743 | NA       |
| ATSG20950 | ATSG20950 | 817.9659 | 833.2429 | 755.8531 | 1619.968 | 1364.683 | 1603.917 | 1225.46  | 1598.915 | 1302.312 | 593.9526 | 423.0462 | 580.1077 | 0.915087 | 4.62E-09  | 0.76     |          |          |          |

|           |           |          |          |          |          |          |          |          |          |          |          |          |          |          |          |          |          |           |          |          |          |    |
|-----------|-----------|----------|----------|----------|----------|----------|----------|----------|----------|----------|----------|----------|----------|----------|----------|----------|----------|-----------|----------|----------|----------|----|
| ATSG22090 | ATSG22090 | 910.7004 | 638.7601 | 741.6889 | 384.7837 | 368.9943 | 422.6605 | 473.9988 | 414.2937 | 436.382  | 780.1025 | 780.906  | 645.3698 | -0.95202 | 2.74E-10 | -0.78023 | 4.61E-07 | -0.05799  | 0.876205 |          |          |    |
| ATSG22100 | ATSG22100 | 89.1678  | 74.98333 | 99.14938 | 171.1523 | 154.3549 | 146.5356 | 160.9639 | 110.0468 | 147.7396 | 89.13238 | 111.8779 | 0.018056 | 0.00014  | 0.645943 | 0.004441 | 0.293629 | 0.459233  |          |          |          |    |
| ATSG22110 | ATDPB8    | 42.80054 | 48.17464 | 36.05432 | 37.94223 | 41.73544 | 36.88311 | 27.56841 | 23.73558 | 20.35611 | 49.89585 | 37.24935 | 51.79533 | -0.10196 | 0.780329 | -0.75188 | 0.020125 | -0.147533 | 0.817365 |          |          |    |
| ATSG22120 | ATSG22120 | 237.7808 | 249.7944 | 229.2025 | 320.8593 | 335.8709 | 332.9448 | 315.7027 | 272.9592 | 271.3964 | 239.8839 | 223.4961 | 238.2585 | 0.461433 | 0.0008   | 0.264624 | 0.090868 | -0.02496  | 0.949285 |          |          |    |
| ATSG22130 | PIGM      | 83.22328 | 83.89556 | 84.98519 | 87.01969 | 78.17114 | 99.68408 | 63.14055 | 67.97007 | 62.47974 | 69.08657 | 61.19536 | 89.08796 | 0.061753 | 0.830612 | -0.36883 | 0.15476  | -0.18526  | 0.684575 |          |          |    |
| ATSG22140 | ATSG22140 | 41.61164 | 14.27397 | 38.62963 | 27.63184 | 32.4609  | 20.93366 | 22.23259 | 22.65669 | 28.31113 | 33.58375 | 27.93701 | 33.14901 | -0.22927 | 0.851439 | -0.37752 | 0.377182 | -0.03254  | 0.974472 |          |          |    |
| ATSG22150 | ATSG22150 | 1.188904 | 0        | 1.287654 | 0.412416 | 0        | 0        | 1.07889  | 0.976246 | 0.959536 | 0        | 2.071813 | -0.45043 | NA       | -0.09671 | NA       | 0.092727 | NA        |          |          |          |    |
| ATSG22160 | ATSG22160 | 1.188904 | 0        | 0        | 0        | 0        | 0        | 0.889303 | 0        | 0        | 0        | 0        | 0        | -0.29092 | NA       | -0.03919 | NA       | -0.19148  | NA       |          |          |    |
| ATSG22170 | ATSG22170 | 0        | 0        | 0        | 0        | 0        | 0        | 0.889303 | 0        | 0        | 0        | 1.330334 | 0        | 0        | NA       | 0        | NA       | 0.141773  | NA       | 0.183636 | NA       |    |
| ATSG22180 | ATSG22180 | 0        | 0        | 0        | 0        | 0        | 0        | 0        | 0        | 0        | 0        | 0        | 0        | 0        | NA       | NA       | NA       | NA        | NA       | NA       | NA       |    |
| ATSG22190 | ATSG22190 | 0        | 0        | 0        | 0        | 0        | 0        | 0        | 0        | 0        | 0.959536 | 0        | 0        | 0        | NA       | NA       | NA       | NA        | NA       | NA       | 0.171512 | NA |
| ATSG22200 | ATSG22200 | 3.566712 | 0        | 0        | 1.237247 | 0.662467 | 0.996841 | 0.889303 | 0        | 0.976246 | 0.959536 | 2.660668 | 0        | -0.12303 | 0.873351 | -0.28705 | 0.699003 | -0.05368  | 0        |          |          |    |
| ATSG22210 | ATSG22210 | 73.71204 | 73.15409 | 60.51975 | 73.82239 | 85.45828 | 54.82624 | 81.81592 | 52.86561 | 168.8906 | 76.76285 | 131.7031 | 96.33931 | 0.046997 | 0.922914 | 0.504635 | 0.207822 | 0.502186  | 0.400342 |          |          |    |
| ATSG22220 | E2FB      | 41.61164 | 33.90067 | 34.76667 | 35.05532 | 45.71024 | 42.86415 | 56.02612 | 53.9445  | 39.04984 | 49.89585 | 47.89202 | 37.29264 | 0.128904 | 0.975578 | 0.399947 | 0.23474  | 0.262747  | 0.646732 |          |          |    |
| ATSG22240 | OPF10     | 1.188904 | 0        | 1.287654 | 1.237247 | 0.662467 | 0.996841 | 1.778607 | 1.07889  | 4.88123  | 2.878607 | 1.330334 | 1.035907 | -0.02633 | 0.975582 | 0.638461 | 0.381634 | 0.349948  | NA       |          |          |    |
| ATSG22250 | CAF1-11   | 17.83356 | 30.33218 | 15.45185 | 115.4764 | 132.4935 | 188.4029 | 201.8179 | 231.9613 | 332.8999 | 19.19071 | 15.96401 | 23.82585 | 2.582724 | 1.27E-17 | 3.371974 | 9.06E-30 | -0.06508  | 0.946773 |          |          |    |
| ATSG22260 | MS1       | 4.755616 | 3.568492 | 2.575309 | 0        | 0        | 1.778607 | 0        | 0        | 0        | 2.878607 | 5.321336 | 0        | -1.50798 | 0.104244 | -1.00686 | 0.132549 | -0.23221  | NA       |          |          |    |
| ATSG22270 | ATSG22270 | 101.0568 | 146.3082 | 128.7654 | 284.9792 | 312.0221 | 211.3302 | 183.1965 | 132.7035 | 287.9926 | 132.4159 | 210.1928 | 134.6678 | 1.051358 | 0.00148  | 0.649998 | 0.034181 | 0.232332  | 0.543547 |          |          |    |
| ATSG22280 | ATSG22280 | 196.1692 | 221.2465 | 220.1889 | 380.2472 | 402.7801 | 336.9322 | 345.9391 | 270.8014 | 354.3773 | 233.1672 | 248.7725 | 234.1419 | 0.805976 | 1.53E-07 | 0.601727 | 0.000207 | 0.165329  | 0.595848 |          |          |    |
| ATSG22290 | NAC089    | 85.60108 | 114.1917 | 93.99877 | 252.3983 | 212.652  | 211.3302 | 191.2002 | 178.0168 | 160.1043 | 94.94003 | 62.5257  | 80.80071 | 1.192582 | 3.73E-10 | 0.840165 | 3.25E-05 | -0.26372  | 0.503347 |          |          |    |
| ATSG22300 | NIT4      | 36.85602 | 55.31163 | 48.93086 | 134.8599 | 145.7428 | 120.6177 | 316.592  | 327.9825 | 314.3512 | 45.09817 | 42.57069 | 46.61579 | 1.482644 | 2.85E-13 | 2.713166 | 3.39E-44 | -0.04669  | 0.942666 |          |          |    |
| ATSG22310 | ATSG22310 | 128.4016 | 96.34929 | 109.4506 | 80.83345 | 82.14594 | 87.72199 | 69.35657 | 76.60119 | 79.07593 | 71.96517 | 65.18636 | 74.58527 | -0.42118 | 0.043016 | -0.56829 | 0.008837 | -0.64591  | 0.019566 |          |          |    |
| ATSG22315 | ATSG22315 | 0        | 0        | 0        | 0.412416 | 0        | 0.996841 | 0        | 0        | 0        | 0        | 0        | 0        | 0.224618 | 0        | 0        | NA       | 0         | NA       |          |          |    |
| ATSG22320 | ATSG22320 | 248.4809 | 192.6986 | 236.9284 | 319.2097 | 373.6315 | 346.9006 | 358.3893 | 268.6436 | 333.8761 | 204.3811 | 216.8444 | 204.0736 | 0.594754 | 0.000271 | 0.48713  | 0.004788 | -0.1255   | 0.721187 |          |          |    |
| ATSG22330 | RIN1      | 216.3805 | 203.404  | 213.7506 | 296.9392 | 274.2615 | 287.091  | 277.866  | 247.0658 | 217.7029 | 231.2481 | 215.5141 | 204.0736 | 0.430785 | 0.003005 | 0.169992 | 0.336916 | 0.036236  | 0.924762 |          |          |    |
| ATSG22340 | ATSG22340 | 687.1865 | 738.6779 | 791.9074 | 610.6785 | 675.7166 | 643.9591 | 788.8122 | 749.8285 | 675.5622 | 934.5877 | 1038.991 | 926.1004 | -0.19908 | 0.129131 | -0.0015  | 0.9932   | 0.382174  | 0.014631 |          |          |    |
| ATSG22350 | ELM1      | 184.2801 | 205.1883 | 229.2025 | 297.3516 | 331.8961 | 328.9575 | 308.5883 | 279.4325 | 243.0853 | 191.5701 | 199.5501 | 196.8222 | 0.619055 | 5.91E-05 | 0.0      | NA       | 0.07148   | 0.012223 |          |          |    |
| ATSG22355 | ATSG22355 | 0        | 0        | 0        | 0        | 0        | 0.889303 | 0        | 0.976246 | 0        | 0        | 0        | 0        | 0        | NA       | 0        | NA       | 0.309898  | NA       |          |          |    |
| ATSG22360 | VAMP714   | 501.7175 | 578.0957 | 643.8272 | 750.5963 | 905.5928 | 704.7664 | 798.5945 | 690.4896 | 734.137  | 620.8196 | 710.3983 | 517.9533 | 0.447212 | 0.008097 | 0.361623 | 0.043986 | 0.098121  | 0.784341 |          |          |    |
| ATSG22370 | EMB81705  | 121.2682 | 115.976  | 233.0654 | 229.7155 | 209.3397 | 245.2228 | 247.2264 | 207.1469 | 137.6507 | 159.2829 | 137.0244 | 174.0323 | 0.507429 | 0.075171 | 0.30991  | 0.336202 | -0.00399  | 0.996123 |          |          |    |
| ATSG22380 | NAC090    | 8.322328 | 14.27397 | 14.1642  | 125.3743 | 139.7806 | 134.5735 | 62.25124 | 75.5223  | 76.14719 | 7.622628 | 6.65167  | 2.071813 | 3.233019 | 2.84E-26 | 2.345513 | 1.8E-13  | -0.86333  | 0.190551 |          |          |    |
| ATSG22390 | ATSG22390 | 161.6909 | 174.8561 | 253.6679 | 91.96867 | 95.39529 | 75.7599  | 35.57214 | 47.47116 | 55.64602 | 222.6123 | 186.2468 | 188.353  | -1.12008 | 1.85E-07 | -2.00864 | 9.26E-19 | -0.01863  | 0.977933 |          |          |    |
| ATSG22400 | ROPAP1    | 156.9353 | 126.6815 | 185.4222 | 146.4075 | 173.5664 | 138.5609 | 113.8308 | 124.0723 | 125.9357 | 176.5546 | 192.8984 | 164.7091 | -0.04043 | 0.871221 | -0.37016 | 0.079549 | 0.168938  | 0.642076 |          |          |    |
| ATSG22410 | PER60     | 1.188904 | 1.784246 | 0        | 0        | 0.662467 | 0        | 0.889303 | 0        | 0        | 0        | 0.959536 | 0        | -0.35544 | NA       | -0.28887 | NA       | -0.47175  | NA       |          |          |    |
| ATSG22420 | FAR7      | 2.377808 | 0        | 0        | 0        | 0        | 0        | 0        | 0        | 0        | 0.959536 | 0        | 0        | -0.38193 | NA       | -0.36181 | NA       | -0.19229  | NA       |          |          |    |
| ATSG22430 | ATSG22430 | 91.5456  | 164.1506 | 106.8753 | 54.85127 | 53.65985 | 8.971567 | 51.5796  | 32.3667  | 30.26363 | 202.462  | 154.3187 | 213.3967 | -1.28683 | 0.00993  | -1.32468 | 0.009552 | 0.548364  | 0.537149 |          |          |    |
| ATSG22440 | RPL10AC   | 880.9778 | 188.9689 | 919.3852 | 806.6849 | 981.7765 | 794.4821 | 787.9229 | 702.3574 | 755.6144 | 877.9751 | 806.1824 | 972.7162 | -0.02095 | 0.910125 | -0.22008 | 0.150927 | 0.020056  | 0.957023 |          |          |    |
| ATSG22450 | ATSG22450 | 473.5167 | 508.5101 | 424.9259 | 427.2625 | 360.3822 | 433.6257 | 461.5485 | 568.575  | 356.3298 | 405.8836 | 383.1362 | 395.7163 | -0.16609 | 0.442007 | -0.01778 | 0.945279 | -0.2023   | 0.540008 |          |          |    |
| ATSG22460 | ATSG22460 | 102.2457 | 76.72258 | 106.8753 | 10.31039 | 5.962205 | 10.96525 | 8.003731 | 3.23667  | 5.857476 | 104.5894 | 79.82004 | 83.90843 | -3.16605 | 1.00E-26 | -3.57722 | 2.43E-25 | -0.0883   | 0.887196 |          |          |    |
| ATSG22470 | PARP3     | 0        | 0        | 0        | 0.662467 | 0        | 3.575214 | 1.07889  | 0        | 0.959536 | 1.330334 | 1.035907 | 0        | 0.024365 | NA       | 0.737348 | NA       | 0.525554  | NA       |          |          |    |
| ATSG22480 | ATSG22480 | 152.1797 | 146.3082 | 169.9704 | 188.4739 | 161.642  | 172.4533 | 133.3955 | 156.439  | 116.1733 | 118.9824 | 174.2738 | 112.9138 | 0.15431  | 0.521701 | -0.20566 | 0.415553 | -0.21458  | 0.584953 |          |          |    |
| ATSG22490 | ATSG22490 | 7.133424 | 5.352738 | 2.575309 | 2.886909 | 1.987402 | 2.990522 | 0.889303 | 1.07889  | 0        | 3.838143 | 2.660668 | 8.287252 | -0.58961 | 0.396381 | -1.35784 | 0.039191 | 0.018623  | NA       |          |          |    |
| ATSG22500 | FAR1      | 171.2022 | 152.6699 | 184.1346 | 129.9109 | 112.6194 | 132.5798 | 90.60199 | 94.94231 | 80.05217 | 115.6066 | 226.1568 | 158.4937 | -0.42901 | 0.041171 | -0.86223 | 3.41E-05 | 0.064594  | 0.894073 |          |          |    |
| ATSG22510 | INVE      | 992.7348 | 105.9641 | 918.0975 | 768.7426 | 607.4825 | 767.574  | 920.4291 | 1022.788 | 741.947  | 940.3449 | 1149.409 | 999.6498 | -0.44897 | 0.006203 | -0.12671 | 0.52771  | 0.071367  | 0.84833  |          |          |    |
| ATSG22520 | ATSG22520 | 13.07794 | 14.27397 | 11.58889 | 63.61834 | 115.2693 | 100.6809 | 119.1667 | 105.7312 | 220.6316 | 3.838143 | 18.62468 | 14.50269 | 2.650315 | 1.52E-13 | 3.143354 | 5.89E-17 | -0.11936  | 0.902964 |          |          |    |
| ATSG22530 | ATSG22530 | 2.377808 | 1.784246 | 7.725926 | 58.97543 | 60.28452 | 68.78201 | 81.81592 | 49.62894 | 143.5082 | 0.959536 | 2.660668 | 2.071813 | 3.188003 | 8.56E-13 | 3.646877 | 5.44E-17 | -0.59726  | 0.551316 |          |          |    |
| ATSG22540 | ATSG22540 | 8.322328 | 5.352738 | 6.438272 | 92.7935  | 82.80841 | 110.6493 | 105.8271 | 98.17898 | 92.74337 | 3.838143 | 2.660668 | 4.143626 | 3.36767  | 3.84E-22 | 3.422174 | 1.37E-22 | -0.62499  | 0.456253 |          |          |    |
| ATSG22545 | ATSG22545 | 2.377808 | 5.352738 | 2.575309 | 55.6761  | 58.29712 | 60.08729 | 17.78607 | 15.10446 | 41.00233 | 0.959536 | 2.660668 | 1.035907 | 3.344396 | 2.15E-13 | 2.185106 | 6.81E-06 | -0.56009  | 0.597722 |          |          |    |
| ATSG22550 | ATSG22550 | 4.755616 | 0        | 0        | 21.03319 | 20.53649 | 20.93366 | 35.85821 | 2.15778  | 2.928738 | 2.878607 | 0        | 1.035907 | 2.551576 | 3.16E-06 | 0.463629 | 0.533926 | -0.18852  | NA       |          |          |    |
| ATSG22555 | ATSG22555 | 0        | 0        | 0        | 0.662467 | 0        | 0        | 0        | 0        | 0        | 0        | 0        | 0        | 0.128567 | NA       | 0        | NA       | 0         | NA       |          |          |    |
| ATSG22560 | ATSG22560 | 3.566712 | 1.784246 | 1.287654 | 28.86909 | 34.4483  | 32.89575 | 2.66791  | 0        | 0.976246 | 0        | 2.660668 | 1.035907 | 3.072606 | 2.88E-09 | -0.43866 | 0.564115 | -0.47368  | NA       |          |          |    |



|           |           |           |          |          |          |          |          |          |          |           |          |          |          |          |           |          |           |          |          |
|-----------|-----------|-----------|----------|----------|----------|----------|----------|----------|----------|-----------|----------|----------|----------|----------|-----------|----------|-----------|----------|----------|
| ATSG23040 | CPP1      | 993.9237  | 1077.685 | 1043     | 979.487  | 1065.247 | 903.1377 | 1073.389 | 955.8965 | 1425.319  | 974.8882 | 889.9934 | 1060.768 | -0.07656 | 0.707795  | 0.147893 | 0.455315  | -0.08728 | 0.805161 |
| ATSG23050 | AAE17     | 153.3686  | 190.9143 | 160.9568 | 107.6405 | 125.2063 | 163.4819 | 256.1194 | 270.8014 | 249.919   | 188.669  | 145.0064 | 196.8222 | -0.35328 | 0.098919  | 0.61282  | 0.002387  | 0.806656 | 0.864774 |
| ATSG23060 | CAS       | 5339.368  | 5716.724 | 6000.469 | 2374.276 | 2454.441 | 2394.412 | 3047.643 | 2752.248 | 2442.567  | 6480.704 | 6522.627 | 6191.613 | -1.22987 | 2.05E-34  | -0.10462 | 0.874E-25 | 0.169189 | 0.342873 |
| ATSG23065 | MIR162B   | 0         | 0        | 0        | 0        | 0        | 0        | 0        | 0        | 0         | 0        | 0        | 0        | #N/A     | #N/A      | #N/A     | #N/A      | #N/A     | #N/A     |
| ATSG23070 | ATSG23070 | 133.1572  | 112.4075 | 118.4642 | 116.3012 | 110.632  | 103.6714 | 101.806  | 96.0212  | 162.0568  | 119.942  | 139.6851 | 120.1652 | -0.13471 | 0.620945  | -0.02191 | 0.946639  | 0.049967 | 0.931292 |
| ATSG23080 | TGH       | 296.0371  | 233.7362 | 204.737  | 191.3608 | 188.1407 | 218.3081 | 203.6505 | 228.7247 | 236.2515  | 199.5834 | 220.8354 | 198.8941 | -0.30136 | 0.101356  | -0.13836 | 0.524363  | -0.24817 | 0.410018 |
| ATSG23090 | DR1       | 85.60108  | 119.197  | 109.4506 | 207.0326 | 200.7276 | 169.6429 | 201.8719 | 148.8868 | 162.0568  | 126.6587 | 109.0874 | 129.8483 | 0.893692 | 4.13E-06  | 0.722478 | 0.000418  | 0.246598 | 0.51664  |
| ATSG23100 | ATSG23100 | 52.31177  | 23.1452  | 37.34198 | 38.35465 | 37.76063 | 42.86415 | 40.01866 | 40.99782 | 46.85981  | 43.1791  | 51.88302 | 72.51346 | 0.026347 | 0.951293  | 0.131669 | 0.755812  | 0.499305 | 0.319624 |
| ATSG23110 | ATSG23110 | 945.1786  | 578.0957 | 477.7198 | 223.5292 | 188.8032 | 350.888  | 360.1679 | 487.6583 | 198.1779  | 422.1957 | 397.7699 | 421.614  | -1.24755 | 0.001006  | -0.84016 | 0.039296  | -0.61855 | 0.31633  |
| ATSG23120 | HCF136    | 1926.024  | 2110.763 | 2048.658 | 1042.587 | 927.4542 | 1072.601 | 1550.945 | 1808.22  | 1684.024  | 2261.625 | 2199.042 | 2297.641 | -0.99215 | 1.06E-22  | -0.26866 | 0.018794  | 0.15129  | 0.414289 |
| ATSG23130 | ATSG23130 | 82.03437  | 58.88012 | 55.36914 | 44.54088 | 50.34751 | 53.8294  | 74.70149 | 66.89118 | 63.45599  | 47.01275 | 70.5077  | 37.29264 | -0.40282 | 0.169188  | 0.052775 | 0.890973  | -0.35364 | 0.472544 |
| ATSG23140 | CLPP2     | 191.4135  | 178.4246 | 239.5037 | 225.5913 | 227.8887 | 220.3018 | 216.99   | 190.9635 | 276.2776  | 170.7973 | 178.2648 | 236.1867 | 0.137365 | 0.563839  | 0.159288 | 0.521717  | -0.05991 | 0.901923 |
| ATSG23150 | HUA2      | 502.9064  | 462.1197 | 351.5296 | 281.2674 | 213.3145 | 319.9859 | 351.2749 | 430.4771 | 240.1565  | 335.8375 | 313.9588 | 304.5565 | -0.67085 | 0.003337  | -0.35338 | 0.169787  | -0.44717 | 0.203912 |
| ATSG23155 | ATSG23155 | 11.88904  | 12.48972 | 3.826923 | 14.84696 | 11.26194 | 14.95261 | 11.56095 | 8.63112  | 11.71495  | 11.51443 | 11.97301 | 4.143626 | 0.470671 | 0.387955  | 0.162585 | 0.811455  | -0.02172 | NA       |
| ATSG23160 | ATSG23160 | 1.188904  | 1.784246 | 1.287654 | 16.49662 | 16.56168 | 21.9305  | 8.893035 | 7.55223  | 17.57243  | 1.919071 | 2.660668 | 1.035907 | 2.446169 | 4.76E-06  | 1.830134 | 0.001338  | 0.064838 | NA       |
| ATSG23170 | ATSG23170 | 14.26685  | 10.70548 | 15.45185 | 5.773818 | 6.624673 | 8.971567 | 8.003731 | 3.23667  | 6.833722  | 7.676285 | 5.321336 | 12.43088 | -0.80286 | 0.119628  | -0.92492 | 0.09307   | -0.54166 | NA       |
| ATSG23180 | ATSG23180 | 0         | 0        | 0        | 0        | 0        | 0        | 0        | 0        | 0         | 0        | 0        | 0        | #N/A     | #N/A      | #N/A     | #N/A      | #N/A     | #N/A     |
| ATSG23190 | CYP86B1   | 2.377808  | 5.352738 | 0        | 3.299325 | 3.312336 | 2.990522 | 0.889303 | 3.23667  | 2.928738  | 2.878607 | 1.330334 | 3.10772  | 0.258064 | 0.742841  | -0.03152 | 0.971995  | 0.031346 | NA       |
| ATSG23200 | ATSG23200 | 77.27876  | 94.56504 | 108.163  | 91.14384 | 86.78321 | 83.73463 | 63.14005 | 90.62675 | 99.57709  | 86.35821 | 83.81104 | 97.37521 | -0.08598 | 0.769138  | -0.14077 | 0.639848  | -0.05734 | 0.921904 |
| ATSG23210 | SCPL34    | 171.5694  | 240.8732 | 233.0654 | 221.0547 | 165.6168 | 247.2165 | 268.5697 | 244.908  | 209.8929  | 190.9476 | 220.8354 | 192.6786 | -0.12484 | 0.577269  | 0.067039 | 0.795755  | -0.19035 | 0.59327  |
| ATSG23212 | ATSG23212 | 0         | 0        | 0        | 0        | 0        | 0        | 0        | 0        | 0         | 0        | 0        | 0        | #N/A     | #N/A      | #N/A     | #N/A      | #N/A     | #N/A     |
| ATSG23220 | NIC3      | 0         | 0        | 1.287654 | 0        | 0        | 0        | 0        | 1.07889  | 0         | 0        | 0        | 0        | -0.25532 | NA        | -0.03893 | NA        | -0.0356  | NA       |
| ATSG23230 | NIC2      | 1.188904  | 1.784246 | 0        | 2.886909 | 3.312336 | 1.993682 | 1.778607 | 1.07889  | 1.952492  | 0.959536 | 0        | 2.071813 | 0.717928 | 0.297463  | 0.26605  | 0.746113  | 0.030894 | NA       |
| ATSG23235 | ATSG23235 | 7.133424  | 5.352738 | 10.30123 | 4.948987 | 4.637271 | 3.987363 | 28.45771 | 14.02557 | 10.73871  | 6.716749 | 9.312338 | 9.323159 | -0.58953 | 0.314703  | 1.007151 | 0.062801  | 0.086582 | NA       |
| ATSG23240 | ATSG23240 | 0         | 0        | 0        | 0        | 0        | 0        | 0        | 0        | 0         | 0        | 0        | 0        | #N/A     | #N/A      | #N/A     | #N/A      | #N/A     | #N/A     |
| ATSG23250 | ATSG23250 | 204.4915  | 223.0308 | 215.0383 | 215.6933 | 209.3397 | 216.3144 | 183.1965 | 188.8057 | 236.2515  | 223.5718 | 200.8804 | 205.1095 | 0.000494 | 0.998724  | -0.07485 | 0.728593  | -0.02309 | 0.958517 |
| ATSG23260 | TT16      | 2.377808  | 0        | 0        | 0        | 0.662467 | 0        | 0.889303 | 2.15778  | 0.972646  | 0        | 0        | 1.035907 | -0.37862 | NA        | 0.21941  | NA        | -0.24582 | NA       |
| ATSG23270 | STP11     | 5.94452   | 8.92123  | 6.438272 | 0.412416 | 1.324935 | 0.996841 | 3.557214 | 4.31556  | 2.928738  | 6.716749 | 10.64267 | 10.35907 | -1.80464 | 0.00204   | -0.67849 | 0.313109  | 0.34355  | NA       |
| ATSG23280 | TCP7      | 473.1838  | 515.6471 | 463.5556 | 249.9238 | 239.1507 | 283.1028 | 375.2861 | 394.8737 | 382.1184  | 469.2129 | 432.3585 | 455.9789 | -0.90589 | 2.86E-14  | -0.32689 | 0.013617  | -0.09124 | 0.721971 |
| ATSG23290 | PDF5      | 172.3911  | 155.2294 | 185.4222 | 234.6645 | 293.473  | 207.3429 | 234.7761 | 145.6501 | 283.1113  | 197.6643 | 226.1568 | 229.9712 | 0.499301 | 0.039471  | 0.355907 | 0.183379  | 0.331553 | 0.410963 |
| ATSG23300 | PYRD      | 72.52314  | 53.52738 | 72.10864 | 71.34789 | 70.22155 | 58.81361 | 50.6903  | 48.55005 | 71.26596  | 58.53167 | 43.90102 | 75.62218 | 0.012549 | 0.972479  | -0.21898 | 0.514493  | -0.14847 | 0.801219 |
| ATSG23310 | FSD3      | 281.7702  | 260.4999 | 294.8728 | 425.6129 | 433.9161 | 372.8185 | 342.3818 | 319.3514 | 439.3107  | 278.2653 | 268.7275 | 353.2441 | 0.546698 | 0.001661  | 0.384768 | 0.041426  | 0.10158  | 0.902927 |
| ATSG23320 | ICMTA     | 15.45575  | 24.97944 | 32.19136 | 22.68286 | 31.79843 | 21.9305  | 22.23259 | 22.65669 | 10.73871  | 12.47396 | 34.58868 | 15.5386  | 0.077391 | 0.890243  | -0.32621 | 0.540663  | -0.21014 | 0.827392 |
| ATSG23330 | RBF1      | 107.0014  | 99.91178 | 103.0123 | 174.4518 | 152.3675 | 132.5798 | 137.842  | 149.9657 | 136.6744  | 114.1847 | 101.1054 | 93.23159 | 0.564663 | 0.003367  | 0.43727  | 0.037379  | -0.00774 | 0.990203 |
| ATSG23340 | ATSG23340 | 238.9697  | 251.5787 | 266.5444 | 245.7997 | 264.9869 | 282.1059 | 333.4888 | 302.0892 | 313.375   | 238.9244 | 238.1298 | 249.6535 | 0.05908  | 0.741285  | 0.323784 | 0.030865  | -0.05717 | 0.866061 |
| ATSG23350 | ATSG23350 | 27.34479  | 26.76369 | 24.46543 | 14.84696 | 12.58688 | 9.968408 | 18.67537 | 15.10446 | 24.40615  | 32.62421 | 30.59768 | 30.04129 | -0.93136 | 0.010762  | -0.38759 | 0.367617  | 0.235951 | 0.74338  |
| ATSG23360 | ATSG23360 | 29.7226   | 37.46917 | 41.20494 | 30.51875 | 49.02258 | 50.83888 | 32.90423 | 30.20892 | 44.90732  | 53.734   | 59.86503 | 42.47217 | 0.225793 | 0.546196  | 0.000615 | 0.998932  | 0.489879 | 0.349624 |
| ATSG23370 | ATSG23370 | 51.151232 | 7.136984 | 10.30123 | 2.886909 | 1.987402 | 1.993682 | 6.225124 | 8.63112  | 1.952492  | 4.797678 | 5.321336 | 6.215439 | -1.37903 | 0.015624  | -0.53088 | 0.427906  | -0.55473 | NA       |
| ATSG23380 | ATSG23380 | 60.6341   | 71.36984 | 64.38272 | 100.6294 | 118.5612 | 107.1251 | 105.8212 | 98.9679  | 106.76285 | 101.1054 | 62.15439 | 66.67269 | 0.647255 | 0.005336  | 0.686629 | 0.004231  | 0.207756 | 0.538161 |
| ATSG23390 | ATSG23390 | 328.1375  | 319.38   | 319.3833 | 307.0456 | 340.5082 | 381.79   | 377.0647 | 346.3237 | 269.4439  | 299.3751 | 313.9588 | 307.6642 | 0.110949 | 0.551433  | 0.037815 | 0.865731  | -0.07044 | 0.848756 |
| ATSG23395 | MIA40     | 102.2457  | 92.78079 | 100.437  | 150.1193 | 162.9669 | 133.5767 | 109.3843 | 96.0212  | 141.5557  | 94.0349  | 110.4177 | 116.0215 | 0.580313 | 0.005238  | 0.221239 | 0.387187  | -0.10459 | 0.830895 |
| ATSG23400 | ATSG23400 | 98.67903  | 49.95889 | 83.69753 | 33.81808 | 27.82363 | 40.87047 | 48.91169 | 63.65451 | 24.40615  | 63.32935 | 85.14137 | 62.15439 | -1.1165  | 0.00063   | -0.72421 | 0.041129  | -0.15232 | 0.837272 |
| ATSG23405 | HMG812    | 78.46766  | 58.80012 | 96.57408 | 167.8531 | 168.2667 | 157.5008 | 135.1741 | 114.3623 | 165.9618  | 96.9131  | 58.53469 | 80.80071 | 1.023992 | 0.704E-06 | 0.781576 | 0.001242  | 0.009811 | 0.989819 |
| ATSG23410 | ATSG23410 | 61.82301  | 51.74313 | 47.64321 | 66.39891 | 66.90919 | 68.78201 | 70.25498 | 53.9445  | 71.26596  | 54.69353 | 54.54369 | 67.33392 | 0.303931 | 0.258374  | 0.264404 | 0.035384  | 0.121204 | 0.8344   |
| ATSG23411 | ATSG23411 | 0         | 0        | 0        | 0        | 0        | 0        | 0        | 0        | 0         | 0        | 0        | 0        | #N/A     | #N/A      | #N/A     | #N/A      | #N/A     | #N/A     |
| ATSG23413 | ATSG23413 | 0         | 1.784246 | 0        | 0        | 0        | 0        | 0        | 0        | 0         | 0        | 0        | 0        | -0.2184  | NA        | -0.20558 | NA        | -0.19918 | NA       |
| ATSG23420 | HMG87     | 254.4254  | 249.7944 | 293.5852 | 206.2078 | 272.9365 | 232.2639 | 150.2923 | 149.9657 | 221.6078  | 347.3519 | 340.5655 | 337.7055 | -0.16619 | 0.449123  | -0.59877 | 0.002287  | 0.352754 | 0.226969 |
| ATSG23430 | ATSG23430 | 162.8798  | 115.976  | 135.2037 | 93.61834 | 94.07035 | 117.6272 | 122.7239 | 103.5734 | 84.9334   | 131.4564 | 118.3997 | 113.9497 | -0.45015 | 0.039141  | -0.40743 | 0.083104  | -0.19899 | 0.644822 |
| ATSG23440 | FR1A1     | 219.9472  | 192.6986 | 175.121  | 153.0062 | 213.9769 | 134.5735 | 184.9751 | 146.729  | 466.6456  | 153.5257 | 238.1298 | 250.6894 | -0.1985  | 0.707618  | 0.384921 | 0.451731  | 0.110085 | 0.915822 |
| ATSG23450 | LCBK1     | 49.03337  | 75.11676 | 68.63198 | 466.8544 | 389.5308 | 588.1361 | 526.6747 | 641.9395 | 467.6128  | 660.1605 | 598.6503 | 666.0789 | -0.66842 | 0.000212  | -0.48973 | 0.010407  | -0.25873 | 0.40809  |
| ATSG23460 | ATSG23460 | 49.99393  | 39.25341 | 42.49259 | 42.89122 | 44.38531 | 28.90388 | 33.12562 | 40.99782 | 33.19236  | 40.3005  | 22.61568 | 45.57989 | -0.15481 | 0.684153  | -0.31461 | 0.40987   | -0.2485  | 0.694775 |
| ATSG23470 | ATSG23470 | 0         | 0        | 0        | 0        | 0        | 0        | 0        | 0        | 0.995936  | 0        | 0        | 0        | 0        | NA        | 0        |           |          |          |

|           |           |          |           |          |          |          |          |          |          |          |          |          |          |          |          |          |           |           |          |
|-----------|-----------|----------|-----------|----------|----------|----------|----------|----------|----------|----------|----------|----------|----------|----------|----------|----------|-----------|-----------|----------|
| ATSG23980 | FRO4      | 60.6341  | 41.03766  | 39.91728 | 9.485558 | 9.274542 | 5.981045 | 16.00746 | 14.02557 | 19.52492 | 22.06932 | 50.55269 | 40.40035 | -2.20684 | 1.17E-09 | -1.37742 | 0.000222  | -0.32584  | 0.627815 |
| ATSG23989 | ATSG23989 | 0        | 0         | 0        | 0        | 0        | 0        | 0        | 0        | 0        | 0        | 0        | 0        | #N/A     | #N/A     | #N/A     | #N/A      | #N/A      | #N/A     |
| ATSG23990 | ATFROS    | 3.566712 | 3.568492  | 3.862963 | 0.412416 | 1.324935 | 0        | 1.778607 | 3.23667  | 0        | 0.995936 | 2.660668 | 1.035907 | -1.162   | 0.075879 | -0.59844 | 0.42538   | -0.66068  | NA       |
| ATSG24000 | ATSG24000 | 118.8904 | 99.91778  | 106.8753 | 85.37002 | 97.38269 | 88.71883 | 169.857  | 126.2301 | 114.2208 | 117.0633 | 168.9524 | 114.9856 | -0.26217 | 0.307763 | 0.319722 | 0.221626  | 0.274143  | 0.506385 |
| ATSG24010 | ATSG24010 | 116.5126 | 101.702   | 106.8753 | 85.37002 | 97.38269 | 88.71883 | 169.857  | 126.2301 | 114.2208 | 117.0633 | 168.9524 | 114.9856 | -0.76216 | 0.000212 | -0.29915 | 0.214587  | -0.03733  | 0.946773 |
| ATSG24020 | MIND1     | 332.8931 | 297.9691  | 325.7765 | 281.2674 | 314.0095 | 285.0965 | 300.7586 | 407.4836 | 423.6908 | 330.0866 | 315.2892 | 359.4116 | -0.12108 | 0.542788 | 0.104045 | 0.631133  | -0.067923 | 0.862386 |
| ATSG24030 | SLAH3     | 180.7134 | 128.4657  | 96.57408 | 69.69823 | 70.884   | 119.6209 | 104.0485 | 117.599  | 128.8645 | 114.1847 | 141.0154 | 109.8061 | -0.63397 | 0.022069 | -0.20551 | 0.542369  | -0.15323  | 0.791922 |
| ATSG24040 | ATSG24040 | 0        | 0         | 0        | 0        | 0        | 0        | 0.889303 | 1.07889  | 0        | 0        | 0        | 2.071813 | 0        | NA       | 0.317529 | NA        | 0.33534   | NA       |
| ATSG24050 | ATSG24050 | 0        | 0         | 0        | 0        | 0        | 0        | 0        | 0        | 0        | 0        | 0        | 0        | #N/A     | #N/A     | #N/A     | #N/A      | #N/A      | #N/A     |
| ATSG24060 | ATSG24060 | 431.5721 | 503.1574  | 513.7741 | 591.4039 | 553.8226 | 686.8233 | 972.898  | 1035.734 | 734.137  | 605.467  | 609.293  | 642.262  | 0.33175  | 0.052149 | 0.90654  | 5.65E-09  | 0.353651  | 0.148892 |
| ATSG24065 | ATSG24065 | 5.94452  | 1.784246  | 1.287654 | 1.649662 | 0.662467 | 0        | 9.35821  | 1.07889  | 4.88123  | 1.919071 | 9.312338 | 3.10772  | -0.83434 | 0.22303  | 0.180635 | 0.83465   | 0.338501  | NA       |
| ATSG24070 | PER61     | 0        | 0         | 0        | 0        | 0        | 0        | 0.889303 | 1.07889  | 0        | 0        | 1.330334 | 0        | 0        | NA       | 0.141773 | NA        | 0.183636  | NA       |
| ATSG24080 | ATSG24080 | 0        | 0         | 0        | 2.886909 | 2.649869 | 2.990522 | 10.67164 | 14.02557 | 0.976246 | 0        | 3.991002 | 1.035907 | 0.95847  | 0.148026 | 1.975361 | 0.001428  | 0.559279  | NA       |
| ATSG24090 | CHIB1     | 0        | 0         | 2.575309 | 6.186234 | 5.299738 | 3.987363 | 0.889303 | 4.31556  | 3.904984 | 1.919071 | 0        | 2.071813 | 1.246515 | 0.052341 | 0.677606 | 0.357419  | 0.155698  | NA       |
| ATSG24100 | ATSG24100 | 0        | 0         | 1.287654 | 0        | 0        | 0        | 0.889303 | 0        | 0        | 0        | 0        | 0        | -0.21946 | NA       | -0.0473  | NA        | -0.20113  | NA       |
| ATSG24105 | AGP41     | 17.83356 | 12.48972  | 19.31482 | 0.824831 | 0.662467 | 0        | 0.889303 | 1.07889  | 3.904984 | 21.10978 | 26.60668 | 44.54398 | -2.9989  | 7.06E-09 | -2.21405 | 2.82E-05  | 0.81893   | NA       |
| ATSG24110 | WRKY30    | 9.511232 | 10.70548  | 6.438272 | 35.46774 | 43.72284 | 47.84836 | 35.57214 | 45.31338 | 28.31113 | 6.716749 | 3.991002 | 3.10772  | 1.996623 | 2.81E-07 | 1.79091  | 8.77E-06  | -0.661    | 0.428336 |
| ATSG24120 | SIGE      | 640.8192 | 619.1334  | 548.5407 | 270.957  | 321.9591 | 274.1312 | 289.0236 | 233.0402 | 171.8193 | 620.8196 | 534.7943 | 547.9946 | -1.03703 | 2.11E-09 | -1.34783 | 1.03E-14  | -0.08277  | 0.841759 |
| ATSG24130 | ATSG24130 | 0        | 0         | 0        | 0.412416 | 0        | 0        | 0        | 0        | 0        | 0        | 0        | 0        | 0.095918 | NA       | 0        | NA        | 0         | NA       |
| ATSG24140 | SEQ4      | 2.377808 | 0         | 1.287654 | 3.299325 | 1.324935 | 2.990522 | 3.557214 | 1.07889  | 1.952492 | 1.919071 | 1.330334 | 0        | 0.450162 | 0.541349 | 0.322828 | 0.688485  | -0.1176   | NA       |
| ATSG24150 | SEQ5      | 870.2777 | 692.2875  | 719.7988 | 362.1009 | 319.3092 | 356.869  | 469.5522 | 402.4259 | 315.3275 | 1318.402 | 1375.565 | 1118.779 | -1.11587 | 5.98E-12 | -0.92508 | 2.39E-08  | 0.72455   | 0.000204 |
| ATSG24155 | ATSG24155 | 10.70014 | 16.05821  | 24.46543 | 8.248311 | 9.937009 | 2.990522 | 7.822338 | 19.42002 | 18.54867 | 44.13864 | 47.89202 | 12.75404 | -0.9997  | 0.035953 | -0.09235 | 0.885055  | 1.011403  | 0.107957 |
| ATSG24160 | SEQ6      | 225.8917 | 208.7568  | 213.7506 | 638.8317 | 582.9712 | 691.8075 | 1086.729 | 1088.6   | 854.2152 | 253.3174 | 301.9858 | 196.8222 | 1.523206 | 7.72E-20 | 2.175144 | 5.99E-40  | 0.19968   | 0.561709 |
| ATSG24165 | ATSG24165 | 172.3911 | 203.404   | 189.2852 | 283.7419 | 292.1481 | 201.3618 | 198.3147 | 176.938  | 569.1514 | 271.5486 | 352.5385 | 343.921  | 0.401757 | 0.398177 | 0.646965 | 0.163906  | 0.677597  | 0.309787 |
| ATSG24170 | ATSG24170 | 70.14533 | 89.2123   | 77.25926 | 70.93548 | 100.695  | 67.78517 | 91.59826 | 67.97007 | 89.81463 | 81.56053 | 119.7301 | 68.36983 | 0.026542 | 0.943467 | 0.062542 | 0.821618  | 0.175979  | 0.753873 |
| ATSG24180 | ATSG24180 | 0        | 0         | 0        | 0.824831 | 0        | 0        | 1.07889  | 0        | 0        | 0        | 0        | 0        | 0.135652 | NA       | 0.145594 | NA        | 0         | NA       |
| ATSG24190 | ATSG24190 | 1.188904 | 0         | 0        | 0.412416 | 0.662467 | 0        | 0        | 0        | 0        | 0        | 0        | 0        | 0.007276 | NA       | -0.22716 | NA        | -0.22076  | NA       |
| ATSG24200 | ATSG24200 | 23.77808 | 39.25341  | 24.46543 | 447.4709 | 392.8431 | 352.8816 | 832.3881 | 745.5129 | 574.0326 | 16.31211 | 30.59768 | 21.75404 | 3.618866 | 5.36E-51 | 4.446253 | 4.08E-77  | -0.31876  | 0.58657  |
| ATSG24205 | ATSG24205 | 9.511232 | 3.568492  | 14.1642  | 28.04426 | 19.87402 | 21.9305  | 9.782338 | 11.86779 | 3.904984 | 5.757214 | 7.982004 | 8.287252 | 1.140482 | 0.015453 | -0.13177 | 0.849548  | -0.29501  | NA       |
| ATSG24206 | ATSG24206 | 3.566712 | 3.568492  | 1.287654 | 8.660727 | 9.937009 | 10.96525 | 4.446517 | 1.07889  | 0.976246 | 2.878607 | 5.321336 | 3.10772  | 1.311109 | 0.027167 | -0.19945 | 0.821336  | 0.1223093 | NA       |
| ATSG24210 | ATSG24210 | 386.3938 | 538.8423  | 431.3642 | 2220.445 | 1867.495 | 2006.64  | 1187.22  | 1236.408 | 1196.878 | 295.537  | 290.0128 | 324.2387 | 2.148705 | 1.46E-61 | 1.405061 | 3.13E-26  | -0.5575   | 0.002303 |
| ATSG24220 | ATSG24220 | 0        | 0         | 0        | 0.996841 | 0        | 0        | 0        | 0        | 0        | 0        | 0        | 0        | 0.15625  | NA       | 0        | NA        | 0         | NA       |
| ATSG24230 | ATSG24230 | 0        | 1.784246  | 1.287654 | 18.14629 | 10.59948 | 11.96209 | 7.114428 | 8.63112  | 3.904984 | 0        | 0        | 0        | 2.371641 | 3.44E-05 | 1.434317 | 0.0023563 | -0.53379  | NA       |
| ATSG24240 | PIAK63    | 4.755616 | 3.568492  | 3.862963 | 28.04426 | 27.82363 | 37.87995 | 17.78607 | 26.97225 | 13.66744 | 3.838143 | 1.330334 | 6.215439 | 2.347073 | 3.43E-07 | 1.712669 | 0.005164  | -0.08671  | NA       |
| ATSG24250 | ATSG24250 | 0        | 0         | 0        | 0        | 0        | 0        | 0.889303 | 0        | 0        | 0        | 0        | 0        | 0.160764 | NA       | 0        | NA        | 0         | NA       |
| ATSG24260 | ATSG24260 | 243.7253 | 235.5205  | 203.4494 | 187.2367 | 179.5286 | 192.3903 | 169.857  | 220.0935 | 165.9618 | 164.0806 | 190.2378 | 207.1813 | -0.28243 | 0.128722 | -0.29288 | 0.138269  | -0.277    | 0.34243  |
| ATSG24270 | CBL4      | 2.377808 | 17.84246  | 11.58889 | 26.02078 | 33.12336 | 19.3147  | 43.57587 | 56.10228 | 36.1211  | 13.4335  | 7.982004 | 11.39497 | 1.196133 | 0.005334 | 1.891345 | 4.39E-06  | 0.10445   | 0.928402 |
| ATSG24280 | GM11      | 43.98945 | 35.68492  | 34.76667 | 18.5587  | 17.88662 | 24.92102 | 40.01866 | 42.07671 | 39.04984 | 49.89585 | 69.17737 | 46.61759 | -0.88143 | 0.004319 | 0.069039 | 0.871033  | 0.485541  | 0.370111 |
| ATSG24290 | MEB2      | 15.45575 | 8.92123   | 12.87654 | 49.48987 | 48.36011 | 51.83572 | 43.57587 | 52.86561 | 38.07359 | 20.15025 | 19.95501 | 20.71813 | 1.777866 | 8.23E-08 | 1.623498 | 2.34E-06  | 0.559604  | 0.308088 |
| ATSG24300 | SS1       | 1288.772 | 1220.424  | 1136.999 | 526.6547 | 461.0772 | 562.2182 | 594.0547 | 712.0674 | 610.1537 | 1040.137 | 884.6721 | 1127.066 | -1.21943 | 4.47E-20 | -0.91676 | 1.38E-11  | -0.25182  | 0.264613 |
| ATSG24310 | ABL13     | 63.01191 | 41.03766  | 52.79383 | 55.26369 | 47.69764 | 29.90522 | 63.14055 | 53.9445  | 45.88356 | 55.65307 | 71.83803 | 67.33392 | -0.2106  | 0.536749 | 0.036945 | 0.929696  | 0.27246   | 0.617081 |
| ATSG24313 | ATSG24313 | 0        | 0         | 0        | 0        | 0        | 0        | 0        | 0        | 0        | 0        | 0        | 0        | #N/A     | #N/A     | #N/A     | #N/A      | #N/A      | #N/A     |
| ATSG24314 | PDE225    | 1020.08  | 1143.702  | 1308.257 | 1534.598 | 1387.206 | 1064.626 | 1356.188 | 1061.628 | 1684.024 | 1787.615 | 1980.867 | 1584.937 | 0.195654 | 0.390931 | 0.234514 | 0.314441  | 0.608116  | 0.01691  |
| ATSG24316 | ATSG24316 | 0        | 0         | 0        | 0.824831 | 0        | 0        | 0        | 0        | 0        | 0        | 0        | 0        | 0.173038 | NA       | 0        | NA        | 0         | NA       |
| ATSG24318 | ATSG24318 | 26.15589 | 26.76369  | 14.1642  | 21.44561 | 17.88662 | 12.95893 | 13.33955 | 26.97225 | 25.3824  | 24.94793 | 22.61568 | 22.78994 | -0.27674 | 0.54765  | -0.02604 | 0.963237  | -0.07563  | 0.940076 |
| ATSG24320 | ATSG24320 | 25.0476  | 230.1677  | 215.0383 | 143.933  | 130.5061 | 169.4626 | 199.204  | 209.3046 | 180.6055 | 198.6239 | 238.1298 | 187.4991 | -0.64992 | 0.000117 | -0.24039 | 0.262248  | -0.16347  | 0.618993 |
| ATSG24330 | ATXR6     | 20.21137 | 17.136984 | 14.1642  | 21.03319 | 12.58688 | 11.96209 | 7.114428 | 7.55223  | 8.786214 | 23.02886 | 21.28534 | 31.0772  | 0.11197  | 0.843513 | -0.71841 | 0.168861  | 0.719499  | NA       |
| ATSG24340 | ATSG24340 | 111.757  | 123.113   | 140.3543 | 102.2791 | 101.3575 | 100.6809 | 134.2848 | 128.3879 | 89.81463 | 31.4564  | 137.0244 | 153.3142 | -0.29282 | 0.186781 | -0.0864  | 0.757238  | 0.165399  | 0.684244 |
| ATSG24350 | MIP2      | 665.7862 | 533.4896  | 444.2407 | 210.3319 | 180.8536 | 332.9448 | 346.8284 | 409.9782 | 168.8906 | 432.7506 | 399.1002 | 444.4039 | -1.1203  | 7.58E-05 | -0.78192 | 0.009168  | -0.34436  | 0.506472 |
| ATSG24352 | ATSG24352 | 19.02246 | 8.92123   | 14.1642  | 15.67179 | 18.8402  | 7.974726 | 13.33955 | 9.710009 | 25.3824  | 11.51443 | 14.63367 | 14.50269 | 0.039727 | 0.950326 | 0.144477 | 0.820048  | -0.07819  | NA       |
| ATSG24355 | ATSG24355 | 0        | 1.784246  | 0        | 0        | 0        | 0        | 2.66791  | 4.31556  | 0.976246 | 1.919071 | 2.660668 | 1.035907 | -0.50274 | 0.454228 | -0.80722 | 0.184138  | 0.586133  | NA       |
| ATSG24360 | IRE1B     | 223.5139 | 223.0308  | 229.2025 | 200.434  | 204.0399 | 242.2323 | 255.2301 | 252.4602 | 155.2231 | 200.5429 | 167.6221 | 233.079  | -0.06669 | 0.808165 | -0.02708 | 0.929576  | -0.15973  | 0.710621 |
| ATSG24370 | ATSG24370 | 0        | 1.784246  | 0        | 0        | 0        | 0        | 0        | 0        | 0.995936 | 0        | 0        | 0        | -0.26756 | NA       | -0.24986 | NA        | -0.06955  | NA       |
| ATSG24380 | YSL2      | 57.06739 | 62.44861  | 59.2321  | 45.77813 | 41.07297 | 63.79781 | 39.12935 | 44.23449 | 27.33489 | 72.92471 | 58.53469 | 61.11849 | -0.2538  | 0.412365 | -0.65179 | 0.030238  | 0.113797  | 0.85654  |
| ATSG24390 |           |          |           |          |          |          |          |          |          |          |          |          |          |          |          |          |           |           |          |

|           |           |          |          |          |          |          |          |          |          |          |          |          |           |           |          |           |          |          |          |
|-----------|-----------|----------|----------|----------|----------|----------|----------|----------|----------|----------|----------|----------|-----------|-----------|----------|-----------|----------|----------|----------|
| ATSG24870 | ATSG24870 | 115.3237 | 99.91778 | 113.3136 | 130.7357 | 129.1811 | 121.6146 | 124.5025 | 170.4646 | 92.74337 | 147.7685 | 107.7571 | 119.1293  | 0.204777  | 0.449578 | 0.220371  | 0.44168  | 0.182695 | 0.698673 |
| ATSG24879 | ATSG24879 | 0        | 0        | 0        | 0        | 0        | 0        | 0        | 0        | 0        | 0        | 0        | 0         | #N/A      | #N/A     | #N/A      | #N/A     | #N/A     | #N/A     |
| ATSG24880 | ATSG24880 | 0        | 0        | 1.287654 | 0        | 0        | 0.996841 | 0        | 0        | 0.976246 | 1.919071 | 0        | 0         | -0.08766  | NA       | -0.05676  | NA       | 1.0094   | NA       |
| ATSG24890 | ATSG24890 | 559.9738 | 715.4827 | 645.1148 | 834.3167 | 965.2148 | 843.3273 | 870.6281 | 744.4341 | 1064.108 | 669.7559 | 738.3354 | 680.5906  | 0.455863  | 0.005028 | 0.475662  | 0.004047 | 0.1211   | 0.711842 |
| ATSG24900 | CYP71A4A  | 0        | 0        | 1.287654 | 0.412416 | 0.662467 | 0        | 0.889303 | 0        | 0.889303 | 0        | 0        | 0         | -0.01389  | NA       | -0.06274  | NA       | -0.24178 | NA       |
| ATSG24910 | CYP71A4A  | 7.133424 | 5.352738 | 2.575309 | 3.299235 | 3.974804 | 0.996841 | 5.335821 | 8.63112  | 6.833722 | 9.595356 | 1.330334 | 6.215439  | -0.53476  | 0.430546 | 0.328594  | 0.662113 | 0.168373 | NA       |
| ATSG24915 | ATSG24915 | 1.188904 | 0        | 0        | 0        | 0.662467 | 0        | 1.778607 | 0        | 3.23667  | 0        | 0        | 0.1035907 | -0.16554  | NA       | 0.514211  | NA       | -0.04819 | NA       |
| ATSG24920 | GDUS      | 17.83356 | 10.70548 | 16.73951 | 15.25938 | 11.92441 | 16.94629 | 12.45025 | 16.18335 | 41.00233 | 9.595356 | 14.63367 | 14.50269  | -0.06222  | 0.92106  | 0.510371  | 0.341824 | -0.2167  | 0.839002 |
| ATSG24930 | ATCOL4    | 3372.92  | 3149.194 | 2711.8   | 1679.769 | 1672.067 | 1671.702 | 1235.243 | 1487.789 | 1838.271 | 2555.243 | 2073.991 | 2304.892  | -0.86322  | 1.86E-08 | -1.00029  | 5.57E-11 | -0.40567 | 0.070998 |
| ATSG24940 | ATSG24940 | 0        | 0        | 0        | 0        | 0        | 0.996841 | 0        | 0        | 1.952492 | 0        | 1.330334 | 0         | 0.116153  | NA       | 0.280653  | NA       | 0.173584 | NA       |
| ATSG24950 | CYP71A15  | 1.188904 | 0        | 0        | 0        | 0        | 0        | 0.889303 | 0        | 0        | 0        | 0        | 0         | -0.20902  | NA       | -0.03919  | NA       | -0.19148 | NA       |
| ATSG24960 | CYP71A14  | 0        | 0        | 0        | 0        | 0.662467 | 0        | 0        | 0        | 0        | 0        | 0        | 0         | 0.128567  | NA       | 0         | NA       | 0        | NA       |
| ATSG24970 | ATSG24970 | 64.20081 | 55.31163 | 69.53333 | 67.63615 | 56.30972 | 53.8294  | 72.92289 | 84.15342 | 48.8123  | 62.36982 | 66.5167  | 74.58527  | -0.08028  | 0.810551 | 0.105803  | 0.764899 | 0.092053 | 0.880443 |
| ATSG24980 | ATSG24980 | 35.66712 | 35.68492 | 31.91482 | 48.25262 | 60.94699 | 25.91786 | 25.7898  | 23.73558 | 86.88589 | 38.38143 | 38.57969 | 37.42764  | 0.507555  | 0.295983 | 0.508306  | 0.322912 | 0.285868 | 0.755395 |
| ATSG24990 | ATSG24990 | 28.53369 | 37.46917 | 33.17901 | 32.16841 | 37.76063 | 22.92734 | 24.9005  | 20.49891 | 34.16861 | 35.50282 | 38.57969 | 47.42717  | -0.05809  | 0.892995 | -0.28104  | 0.491965 | 0.225958 | 0.734334 |
| ATSG25000 | ATSG25000 | 0        | 0        | 1.287654 | 0        | 0        | 0        | 0        | 0        | 0        | 0        | 0        | 0.2071813 | -0.22624  | NA       | -0.20656  | NA       | 0.115737 | NA       |
| ATSG25010 | ATSG25010 | 7.133424 | 8.92123  | 9.01358  | 16.90904 | 21.19895 | 15.94945 | 8.893035 | 7.55223  | 17.57243 | 9.595356 | 11.97301 | 5.179533  | 0.945456  | 0.051356 | 0.355556  | 0.558795 | 0.053417 | NA       |
| ATSG25020 | ATSG25020 | 7.133424 | 1.784246 | 6.438272 | 4.124156 | 21.29804 | 8.971567 | 1.778607 | 4.31556  | 4.88123  | 4.979678 | 5.321336 | 0         | 0.04345   | 0.958316 | -0.35293  | 0.650272 | -0.42486 | NA       |
| ATSG25030 | ATSG25030 | 0        | 0        | 0        | 0        | 0.662467 | 0        | 0        | 0        | 0        | 0        | 0        | 0         | 0.128567  | NA       | 0         | NA       | 0        | NA       |
| ATSG25040 | ATSG25040 | 265.1256 | 262.2842 | 239.5037 | 294.0523 | 304.7349 | 288.087  | 355.7214 | 365.7437 | 316.3037 | 254.2769 | 264.7365 | 256.9048  | 0.209139  | 0.155998 | 0.431784  | 0.002027 | 0.016278 | 0.966633 |
| ATSG25045 | ATSG25045 | 14.26685 | 1.784246 | 1.287654 | 2.886909 | 3.124935 | 2.990522 | 8.893035 | 7.55223  | 1.952492 | 2.878607 | 1.330334 | 3.10772   | -0.79061  | 0.242538 | 0.032664  | 0.970414 | -0.72404 | NA       |
| ATSG25050 | ATSG25050 | 118.8904 | 140.9554 | 100.437  | 116.1992 | 139.1181 | 141.5514 | 127.1704 | 155.3602 | 181.5818 | 131.4564 | 111.7481 | 107.7343  | -0.176291 | 0.461712 | 0.364275  | 0.110809 | -0.02258 | 0.970516 |
| ATSG25060 | ATSG25060 | 608.7188 | 55.6471  | 484.158  | 444.584  | 439.2158 | 419.67   | 421.5299 | 528.6561 | 461.7644 | 420.2766 | 408.4125 | 442.3321  | -0.30009  | 0.039636 | -0.18975  | 0.24612  | -0.33663 | 0.100977 |
| ATSG25070 | ATSG25070 | 372.1269 | 328.3013 | 332.2148 | 211.9816 | 282.8735 | 305.0333 | 279.2413 | 315.0359 | 336.8049 | 312.8086 | 324.6015 | 303.5206  | -0.37486  | 0.032364 | -0.14969  | 0.475461 | -0.13476 | 0.691846 |
| ATSG25080 | ATSG25080 | 199.7359 | 198.0513 | 216.3259 | 235.0769 | 254.3874 | 186.4092 | 228.551  | 134.8612 | 189.3917 | 232.2076 | 243.4511 | 163.6732  | 0.137728  | 0.163668 | -0.14361  | 0.623849 | 0.05277  | 0.927039 |
| ATSG25090 | ENODL13   | 68.95643 | 37.46917 | 41.20944 | 143.5206 | 121.2315 | 103.6714 | 79.14801 | 73.36452 | 107.3871 | 97.87263 | 126.3817 | 91.15977  | 1.236102  | 2.27E-05 | 0.743295  | 0.009939 | 1.002477 | 0.002892 |
| ATSG25100 | TMN9      | 1304.228 | 1188.308 | 1033.986 | 634.2952 | 514.7371 | 789.4979 | 703.4391 | 796.2208 | 477.3843 | 942.2604 | 839.4407 | 899.1669  | -0.84116  | 6.89E-05 | -0.24671  | 0.105989 | -0.38404 | 0.230871 |
| ATSG25102 | ATSG25102 | 0        | 0        | 0        | 0        | 0        | 0        | 0        | 0        | 0        | 0        | 0        | 0         | #N/A      | #N/A     | #N/A      | #N/A     | #N/A     | #N/A     |
| ATSG25110 | CIPK25    | 11.88904 | 14.27397 | 3.862963 | 2.062078 | 0        | 1.993682 | 0.889303 | 3.23667  | 5.857476 | 2.878607 | 5.321336 | 7.251346  | -1.76221  | 0.003257 | -1.07029  | 0.102458 | -0.6677  | NA       |
| ATSG25120 | CYP71B11  | 184.2801 | 206.9725 | 198.2988 | 252.8107 | 282.8735 | 243.2291 | 300.5846 | 247.0658 | 307.5175 | 212.0574 | 243.4511 | 257.9407  | 0.400168  | 0.01626  | 0.533133  | 0.001363 | 0.271824 | 0.31641  |
| ATSG25130 | CYP71B12  | 187.8468 | 187.3458 | 186.7099 | 123.7247 | 127.8562 | 133.5767 | 169.857  | 184.4902 | 205.9879 | 265.7914 | 328.5925 | 231.0772  | -0.53845  | 0.002726 | -0.00493  | 0.98497  | 0.538392 | 0.017808 |
| ATSG25140 | CYP71B13  | 190.2246 | 173.0719 | 168.6827 | 122.4874 | 131.1685 | 129.5893 | 88.04104 | 65.81229 | 92.74337 | 147.7685 | 183.5861 | 172.9964  | -0.46817  | 0.01052  | -0.107743 | 5.22E-09 | -0.08236 | 0.844669 |
| ATSG25150 | TAF5      | 173.58   | 180.2088 | 197.0111 | 223.5292 | 180.8536 | 185.4124 | 200.9826 | 223.3302 | 157.1756 | 181.3522 | 159.6401 | 188.335   | 0.103371  | 0.649768 | 0.074631  | 0.770641 | -0.05219 | 0.910917 |
| ATSG25160 | ZFP3      | 8.322328 | 8.92123  | 14.1642  | 12.37427 | 5.962205 | 3.987363 | 8.893035 | 3.23667  | 6.833722 | 18.23118 | 18.62468 | 9.321359  | -0.32793  | 0.592572 | -0.54464  | 0.385294 | -0.48722 | NA       |
| ATSG25170 | ATSG25170 | 91.54556 | 83.85956 | 104.3    | 150.5317 | 176.8788 | 130.5861 | 138.7313 | 100.3368 | 189.3917 | 108.4275 | 147.6671 | 102.5547  | 0.678548  | 0.008274 | 0.584253  | 0.032235 | 0.328611 | 0.472544 |
| ATSG25180 | CYP71B14  | 1.188904 | 0        | 0        | 2.474493 | 0.662467 | 1.993682 | 1.778607 | 1.07889  | 0        | 0        | 0        | 0         | 0.615734  | NA       | 0.246192  | NA       | -0.27053 | NA       |
| ATSG25190 | ERF003    | 150.9908 | 176.6404 | 175.121  | 291.1654 | 229.2137 | 176.4408 | 85.37313 | 81.99564 | 112.2683 | 101.7108 | 114.4087 | 110.842   | 0.473664  | 0.0343   | -0.81221  | 0.000373 | -0.59817 | 0.055489 |
| ATSG25200 | ATSG25200 | 4.755616 | 0        | 1.287654 | 1.327247 | 3.312336 | 0.993682 | 0.889303 | 3.23667  | 1.952492 | 1.919071 | 3.991002 | 2.071813  | -0.02532  | 0.976621 | -0.07313  | 0.934984 | 0.124378 | NA       |
| ATSG25205 | ATSG25205 | 4.755616 | 1.784246 | 0        | 0.824831 | 1.987402 | 0        | 2.66791  | 2.15778  | 0.976246 | 0        | 1.330334 | 3.10772   | -0.4735   | 0.51288  | -0.07645  | 0.930797 | -0.24489 | NA       |
| ATSG25210 | ATSG25210 | 80.84547 | 98.13353 | 105.5877 | 170.74   | 196.7528 | 177.4377 | 235.6654 | 229.8036 | 313.375  | 76.76285 | 102.4357 | 124.3088  | 0.907775  | 2.76E-05 | 1.410719  | 1.79E-11 | 0.088184 | 0.871353 |
| ATSG25220 | KNA73     | 475.5616 | 444.2773 | 446.8161 | 471.8074 | 472.3392 | 444.591  | 469.5522 | 500.2339 | 608.2013 | 536.3804 | 540.1156 | 474.4452  | 0.02297   | 0.90291  | 0.246751  | 0.105989 | 0.177883 | 0.468231 |
| ATSG25230 | ATSG25230 | 72.52314 | 85.64381 | 82.40988 | 47.84021 | 40.4105  | 69.77885 | 63.14055 | 55.02339 | 36.1211  | 77.72239 | 75.82904 | 76.65708  | -0.59755  | 0.029118 | -0.60063  | 0.039442 | -0.05369 | 0.937511 |
| ATSG25240 | ATSG25240 | 13.07794 | 10.70548 | 7.725926 | 15.67179 | 25.17376 | 20.93366 | 36.46144 | 48.55005 | 97.6246  | 11.51443 | 10.64267 | 15.5386   | 0.766725  | 0.104531 | 2.190213  | 1.54E-07 | 0.188329 | 0.861847 |
| ATSG25250 | FLOT1     | 116.5126 | 230.1677 | 127.4778 | 677.0001 | 592.2457 | 837.3463 | 1041.374 | 1175.99  | 1311.098 | 61.41028 | 53.21336 | 94.26749  | 2.069633  | 1.4E-18  | 2.791157  | 2.33E-33 | -1.0873  | 0.006622 |
| ATSG25260 | FLOT2     | 28.53369 | 67.80135 | 39.91728 | 143.933  | 112.6194 | 149.5261 | 179.6393 | 226.5669 | 219.6553 | 21.10978 | 15.96401 | 26.93357  | 1.541609  | 2.22E-09 | 2.143758  | 1.98E-17 | -0.92784 | 0.025933 |
| ATSG25265 | ATSG25265 | 863.1443 | 1025.941 | 958.0148 | 1159.3   | 1273.262 | 1313.836 | 982.6803 | 915.9776 | 914.7425 | 760.9118 | 992.4291 | 825.6175  | 0.392329  | 0.003748 | -0.01449  | 0.941525 | -0.14152 | 0.575777 |
| ATSG25270 | ATSG25270 | 578.9962 | 585.2327 | 565.2803 | 529.1292 | 449.1528 | 570.1929 | 603.8371 | 646.2551 | 464.6931 | 474.0106 | 432.3585 | 539.7073  | -0.15796  | 0.402757 | -0.01213  | 0.959781 | -0.25148 | 0.360041 |
| ATSG25280 | ATSG25280 | 1358.917 | 1589.763 | 1400.968 | 1483.046 | 1736.989 | 1542.113 | 1678.116 | 1667.964 | 1746.504 | 1360.622 | 1488.644 | 1391.222  | 0.131558  | 0.301612 | 0.227881  | 0.064743 | -0.03493 | 0.898417 |
| ATSG25290 | ATSG25290 | 0        | 0        | 0        | 0.824831 | 0        | 0        | 0        | 0        | 0        | 0        | 0        | 0         | 0.173038  | NA       | 0         | NA       | 0        | NA       |
| ATSG25300 | ATSG25300 | 1.188904 | 0        | 0        | 0        | 0        | 0        | 0        | 0        | 0        | 0        | 0        | 0         | -0.2184   | NA       | -0.20558  | NA       | -0.19918 | NA       |
| ATSG25305 | ATSG25305 | 0        | 0        | 0        | 0.412416 | 0        | 0        | 0        | 0        | 0        | 0        | 0        | 0         | 0.095918  | NA       | 0         | NA       | 0        | NA       |
| ATSG25310 | ATSG25310 | 0        | 1.784246 | 1.287654 | 0.824831 | 0.662467 | 0.996841 | 0.889303 | 1.07889  | 0        | 2.878607 | 1.330334 | 1.035907  | -0.09082  | 0.910574 | -0.16454  | 0.838886 | 0.361509 | NA       |
| ATSG25320 | ACR2      | 0        | 0        | 0        | 0.412416 | 0.662467 | 0        | 1.07889  | 0        | 0        | 1.330334 | 0        | 0         | 0.203973  | NA       | 0.174698  | NA       | 0.203433 | NA       |
| ATSG25330 | ATSG25330 | 0        | 0        | 0        | 0        | 0        | 0        | 0        | 0        | 0        | 0        | 0        | 0         | #N/A      | #N/A     | #N/A      | #N/A     | #N/A     | #N/A     |

|           |           |          |          |          |          |          |          |          |          |          |          |          |          |          |          |          |          |          |          |
|-----------|-----------|----------|----------|----------|----------|----------|----------|----------|----------|----------|----------|----------|----------|----------|----------|----------|----------|----------|----------|
| ATSG25840 | ATSG25840 | 135.535  | 258.7157 | 227.9148 | 182.7001 | 171.579  | 171.4566 | 232.1082 | 216.8569 | 310.4462 | 263.8723 | 248.7725 | 189.5709 | -0.22326 | 0.417682 | 0.286935 | 0.301269 | 0.177087 | 0.712267 |
| ATSG25850 | ATSG25850 | 0        | 0        | 0        | 0        | 0        | 0        | 0        | 0        | 0        | 0        | 0        | 0        | #N/A     | #N/A     | #N/A     | #N/A     | #N/A     | #N/A     |
| ATSG25860 | ATSG25860 | 1.188904 | 0        | 0        | 0        | 0        | 0        | 0        | 1.07889  | 0        | 0        | 0        | 0        | -0.2127  | NA       | -0.02202 | NA       | -0.1938  | NA       |
| ATSG25870 | ATSG25870 | 0        | 0        | 0        | 0        | 0        | 0        | 0        | 0        | 0        | 0        | 0        | 0        | #N/A     | #N/A     | #N/A     | #N/A     | #N/A     | #N/A     |
| ATSG25880 | NADP-ME3  | 15.45575 | 14.27397 | 15.45185 | 23.50769 | 20.53649 | 31.8989  | 17.78607 | 19.42002 | 15.61994 | 23.02886 | 26.60668 | 27.96948 | 0.639844 | 0.106018 | 0.181975 | 0.728552 | 0.685438 | 0.257793 |
| ATSG25890 | IAA2H     | 71.33424 | 69.5856  | 82.40988 | 89.49418 | 72.20893 | 75.7599  | 80.92662 | 75.5223  | 92.74337 | 83.4796  | 57.20436 | 69.40574 | 0.092    | 0.754178 | 0.14959  | 0.618781 | -0.07649 | 0.893141 |
| ATSG25900 | KO        | 449.4057 | 387.1814 | 431.3642 | 387.6706 | 362.3696 | 474.4962 | 410.8582 | 412.136  | 300.6838 | 379.9761 | 341.8958 | 357.3878 | -0.05679 | 0.796186 | -0.17393 | 0.398534 | -0.22944 | 0.441758 |
| ATSG25910 | AIPLP2    | 9.511232 | 12.48972 | 7.725926 | 66.39891 | 76.18374 | 75.7599  | 81.81592 | 74.44341 | 42.95482 | 6.716749 | 6.65167  | 6.215439 | 2.593717 | 3.46E-13 | 2.466434 | 1.01E-14 | -0.45041 | 0.595756 |
| ATSG25920 | ATSG25920 | 3.566712 | 1.784246 | 2.575309 | 3.299325 | 1.324935 | 2.990522 | 3.557214 | 3.23667  | 2.928738 | 2.878607 | 1.330334 | 3.10772  | -0.05465 | 0.949512 | 0.155672 | 0.857374 | -0.06786 | NA       |
| ATSG25930 | ATSG25930 | 102.2457 | 82.07532 | 72.10864 | 307.2496 | 284.1985 | 423.6573 | 405.5224 | 450.976  | 409.0471 | 44.13864 | 43.90102 | 46.61579 | 1.9134   | 3.35E-22 | 2.230488 | 7.66E-30 | -0.88413 | 0.003385 |
| ATSG25940 | ATSG25940 | 74.90095 | 105.2705 | 93.99877 | 140.6337 | 172.2415 | 111.6462 | 111.1629 | 96.0212  | 163.0331 | 93.07496 | 125.0514 | 72.51346 | 0.613316 | 0.028505 | 0.420126 | 0.177098 | 0.078866 | 0.907542 |
| ATSG25950 | ATSG25950 | 0        | 0        | 1.287654 | 0.412416 | 0        | 0.996841 | 0        | 0        | 0        | 0        | 1.330334 | 2.071813 | -0.01263 | NA       | -0.27831 | NA       | 0.317828 | NA       |
| ATSG25955 | ATSG25955 | 0        | 0        | 0        | 0.412416 | 0        | 0        | 0        | 0        | 0        | 0        | 0        | 0        | 0.095918 | NA       | 0        | NA       | 0        | NA       |
| ATSG25960 | ATSG25960 | 0        | 0        | 0        | 0.412416 | 0        | 0        | 0        | 0        | 0        | 0        | 0        | 0        | 0.065109 | NA       | 0        | NA       | 0.150531 | NA       |
| ATSG25970 | ATSG25970 | 2.377808 | 3.568492 | 9.01358  | 6.598649 | 10.59948 | 11.96209 | 6.225124 | 9.710009 | 5.857476 | 2.878607 | 1.330334 | 4.143626 | 0.703767 | 0.244486 | 0.374343 | 0.599613 | -0.51009 | NA       |
| ATSG25980 | TGG2      | 17683.76 | 17294.7  | 18216.45 | 8080.871 | 6096.024 | 8705.411 | 9081.567 | 11290.58 | 9141.567 | 23757.14 | 28530.34 | 17626.99 | -1.18745 | 5.02E-11 | -0.82928 | 8.94E-06 | 0.384761 | 0.185652 |
| ATSG25990 | ATSG25990 | 4.755616 | 1.784246 | 6.438272 | 1.237247 | 1.987402 | 2.990522 | 3.557214 | 7.55223  | 0.976246 | 7.676285 | 2.660668 | 7.251346 | -0.73063 | 0.278573 | -0.10811 | 0.899783 | 0.296687 | NA       |
| ATSG26000 | TGG1      | 28377.95 | 30135.92 | 32298.23 | 22915.05 | 17886.62 | 24905.07 | 26597.29 | 29212.02 | 22161.76 | 38938.92 | 46161.26 | 29103.79 | -0.4557  | 0.019241 | -0.2147  | 0.339157 | 0.322765 | 0.287597 |
| ATSG26010 | ATSG26010 | 2.377808 | 7.136984 | 5.150617 | 6.186234 | 5.299738 | 9.968408 | 5.335821 | 7.55223  | 11.71495 | 11.51443 | 5.321336 | 13.46678 | 0.374503 | 0.56345  | 0.562    | 0.391386 | 0.828769 | NA       |
| ATSG26015 | ATSG26015 | 0        | 0        | 0        | 0        | 0        | 0        | 0.889303 | 0        | 0        | 0        | 0        | 0        | #N/A     | #N/A     | #N/A     | #N/A     | #N/A     | #N/A     |
| ATSG26020 | ATSG26020 | 0        | 0        | 0        | 0        | 0        | 0        | 0        | 0        | 0.889303 | 0        | 0        | 0        | 0        | NA       | 0.160764 | NA       | 0        | NA       |
| ATSG26030 | HEM15     | 286.5259 | 301.5376 | 285.8593 | 501.4973 | 443.1906 | 627.0128 | 753.24   | 762.7752 | 672.6335 | 241.803  | 199.5501 | 272.4434 | 0.827378 | 4.92E-07 | 1.301028 | 3.85E-16 | -0.27954 | 0.337764 |
| ATSG26038 | MIR860A   | 0        | 0        | 0        | 0        | 0        | 0        | 0        | 0        | 0        | 0        | 0        | 0        | #N/A     | #N/A     | #N/A     | #N/A     | #N/A     | #N/A     |
| ATSG26040 | HDA2      | 76.08985 | 74.93833 | 59.2321  | 72.17273 | 69.55906 | 81.74094 | 109.3843 | 105.7312 | 111.292  | 58.53167 | 30.59768 | 78.7289  | 0.079932 | 0.817831 | 0.610352 | 0.029016 | -0.28397 | 0.581553 |
| ATSG26050 | ATSG26050 | 0        | 0        | 0        | 0        | 0        | 0        | 0        | 0        | 0        | 0        | 0        | 0        | 0        | NA       | 0        | NA       | 0.172362 | NA       |
| ATSG26060 | ATSG26060 | 0        | 0        | 0        | 0        | 0        | 0        | 0        | 0        | 0        | 0        | 0        | 0        | #N/A     | #N/A     | #N/A     | #N/A     | #N/A     | #N/A     |
| ATSG26070 | ATSG26070 | 0        | 0        | 0        | 0        | 0        | 0        | 0        | 0        | 0        | 0        | 0        | 0        | #N/A     | #N/A     | #N/A     | #N/A     | #N/A     | #N/A     |
| ATSG26080 | ATSG26080 | 0        | 0        | 0        | 0        | 0        | 0        | 0        | 0        | 0        | 0        | 0        | 0        | #N/A     | #N/A     | #N/A     | #N/A     | #N/A     | #N/A     |
| ATSG26090 | ATSG26090 | 1.188904 | 1.784246 | 1.287654 | 0        | 0.662467 | 0        | 0.889303 | 0        | 0        | 0        | 0        | 1.035907 | -0.60679 | NA       | -0.51012 | NA       | -0.478   | NA       |
| ATSG26100 | ATSG26100 | 0        | 0        | 0        | 0        | 0        | 0        | 0        | 0        | 0        | 0        | 0        | 0        | #N/A     | #N/A     | #N/A     | #N/A     | #N/A     | #N/A     |
| ATSG26110 | ATSG26110 | 102.2457 | 92.78079 | 90.1358  | 167.4407 | 181.516  | 150.523  | 140.51   | 148.8868 | 106.4108 | 136.2541 | 127.7121 | 104.6266 | 0.787342 | 8.09E-05 | 0.453495 | 0.044324 | 0.354182 | 0.303139 |
| ATSG26114 | ATSG26114 | 0        | 0        | 0        | 0        | 0        | 0        | 0        | 0        | 0        | 0        | 0        | 0        | #N/A     | #N/A     | #N/A     | #N/A     | #N/A     | #N/A     |
| ATSG26120 | ASD2      | 1.188904 | 0        | 0        | 0        | 1.324935 | 0.996841 | 0        | 0        | 0.976246 | 0        | 0        | 0        | 0.170533 | NA       | -0.05124 | NA       | -0.22713 | NA       |
| ATSG26130 | ATSG26130 | 0        | 0        | 0        | 0        | 0        | 0        | 0        | 0        | 0        | 0        | 0        | 0        | #N/A     | #N/A     | #N/A     | #N/A     | #N/A     | #N/A     |
| ATSG26140 | LOG9      | 0        | 0        | 0        | 0        | 0        | 0        | 0.889303 | 0        | 0        | 0        | 0        | 0        | 0        | NA       | 0.160764 | NA       | 0        | NA       |
| ATSG26146 | ATSG26146 | 0        | 0        | 0        | 0        | 0        | 0        | 0        | 0        | 0        | 0        | 0        | 0        | #N/A     | #N/A     | #N/A     | #N/A     | #N/A     | #N/A     |
| ATSG26147 | MIR156F   | 0        | 0        | 0        | 0        | 0        | 0        | 0.889303 | 0        | 0        | 0        | 0        | 0        | 0        | NA       | 0.160764 | NA       | 0        | NA       |
| ATSG26150 | ATSG26150 | 0        | 0        | 0        | 0        | 0        | 0        | 0.889303 | 0        | 0        | 0        | 0        | 0        | 0        | NA       | 0.160764 | NA       | 0        | NA       |
| ATSG26160 | ATSG26160 | 137.9129 | 126.6815 | 121.0395 | 90.31901 | 87.44568 | 112.643  | 136.0634 | 124.0723 | 80.05217 | 121.861  | 125.0514 | 124.3088 | -0.4097  | 0.077649 | -0.17521 | 0.526242 | -0.05505 | 0.921149 |
| ATSG26170 | WRKY50    | 20.21137 | 37.46917 | 27.04074 | 244.15   | 257.6998 | 220.3018 | 129.8383 | 148.8868 | 241.1328 | 23.02886 | 59.86503 | 26.93357 | 2.873147 | 1.47E-20 | 2.420502 | 1.38E-14 | 0.311314 | 0.6514   |
| ATSG26180 | ATSG26180 | 115.3237 | 146.3082 | 160.9568 | 194.6602 | 158.3297 | 175.444  | 182.3072 | 176.938  | 130.817  | 95.95356 | 77.15937 | 117.0574 | 0.32064  | 0.170443 | 0.221488 | 0.425548 | -0.51095 | 0.124364 |
| ATSG26190 | ATSG26190 | 5.94452  | 3.568492 | 3.862963 | 1.649662 | 3.312336 | 4.984204 | 1.778607 | 4.31556  | 0        | 12.47396 | 2.660668 | 2.071813 | -0.30984 | 0.684899 | -0.6292  | 0.396518 | 0.256627 | NA       |
| ATSG26200 | ATSG26200 | 54.68958 | 71.36984 | 57.94445 | 37.1174  | 32.4609  | 29.90522 | 25.7898  | 26.97225 | 32.21612 | 56.6126  | 45.23135 | 39.36445 | -0.80997 | 0.002973 | -1.03792 | 0.000326 | -0.34299 | 0.484078 |
| ATSG26210 | AL4       | 428.0054 | 428.219  | 410.7617 | 411.5907 | 419.3418 | 397.7395 | 346.8284 | 308.5625 | 451.0256 | 414.5194 | 383.1362 | 430.9371 | -0.04221 | 0.836141 | -0.19095 | 0.297913 | -0.04167 | 0.914692 |
| ATSG26220 | ATSG26220 | 52.31177 | 58.88012 | 60.51975 | 84.13278 | 80.15854 | 45.85468 | 50.6903  | 43.1556  | 38.07359 | 73.88424 | 78.4897  | 52.83123 | 0.304112 | 0.340164 | -0.35189 | 0.310468 | 0.24134  | 0.669283 |
| ATSG26230 | MAKR1     | 90.35667 | 57.09587 | 42.49259 | 23.50769 | 25.17376 | 23.92418 | 25.7988  | 30.20892 | 23.4299  | 71.00564 | 73.16837 | 52.83123 | -1.10221 | 1.36E-05 | -1.18288 | 0.00019  | 0.038778 | 0.961988 |
| ATSG26233 | ATSG26233 | 0        | 0        | 0        | 0.412416 | 0        | 0        | 0        | 0.889303 | 0        | 0        | 0        | 0        | 0.066991 | NA       | 0.136991 | NA       | 0        | NA       |
| ATSG26236 | ATSG26236 | 1.188904 | 0        | 0        | 0        | 0        | 0        | 0        | 1.07889  | 0        | 0.995936 | 0        | 0        | -0.24564 | NA       | -0.03069 | NA       | -0.03478 | NA       |
| ATSG26240 | CLC-D     | 508.8509 | 517.4313 | 517.637  | 404.5797 | 408.7423 | 444.591  | 513.1281 | 447.7393 | 323.1374 | 473.0511 | 473.5989 | 555.2459 | -0.29156 | 0.110519 | -0.25971 | 0.184278 | -0.03815 | 0.930902 |
| ATSG26250 | SP78      | 0        | 0        | 0        | 0        | 0        | 0        | 0.889303 | 0.77889  | 0        | 0        | 0        | 0        | 0        | NA       | 0.301684 | NA       | 0.463035 | NA       |
| ATSG26260 | ATSG26260 | 1.188904 | 0        | 0        | 0.824831 | 3.312336 | 2.990522 | 0.114428 | 1.07889  | 4.88123  | 5.757214 | 9.312338 | 5.179533 | 0.575527 | 0.420461 | 1.191912 | 0.074951 | 1.593761 | NA       |
| ATSG26262 | ATSG26262 | 0        | 0        | 0        | 0        | 0        | 0        | 0        | 0        | 0        | 0        | 0        | 0        | #N/A     | #N/A     | #N/A     | #N/A     | #N/A     | #N/A     |
| ATSG26270 | ATSG26270 | 4.755616 | 3.568492 | 1.287654 | 14.02213 | 12.58688 | 16.94629 | 16.00746 | 9.710009 | 20.50117 | 0.995936 | 5.321336 | 4.143626 | 1.582589 | 0.002752 | 1.659577 | 0.002169 | -0.01756 | NA       |
| ATSG26280 | ATSG26280 | 1.188904 | 8.92123  | 5.150617 | 28.86909 | 31.13596 | 39.87363 | 21.34328 | 25.89336 | 44.90732 | 9.595356 | 6.65167  | 9.323159 | 2.240083 | 5.29E-07 | 2.136545 | 2.93E-06 | 0.559975 | 0.542377 |
| ATSG26283 | ATSG26283 | 0        | 0        | 0        | 0.412416 | 0        | 0        | 1.07889  | 0        | 0.995936 | 0        | 0        | 1.035907 | 0.057886 | NA       | 0.177727 | NA       | 0.356639 | NA       |
| ATSG26286 | ATSG26286 | 0        | 1.784246 | 0        | 0.412416 | 0        | 0        | 0.889303 | 0        | 0.976246 | 0        | 0        | 0        | -0.20148 | NA       | 0.084883 | NA       | -0.28022 | NA       |
| ATSG26290 | ATSG26290 | 0        | 0        | 0        | 0.824831 | 0        | 0        | 1.778607 | 1.07889  | 0        | 0        | 0        | 0        | 0.149417 | NA       | 0.446881 | NA       | 0        | NA       |
| ATSG26300 | ATSG26300 | 1.188904 | 0        | 0        | 0.412416 | 0        | 0.996841 | 0.889303 | 0        | 1.952492 | 0        | 0        | 0        | -0.00134 | NA       | 0.269009 | NA       | -0.25186 | NA       |
| ATSG26310 | UG72E3    | 0        | 0        | 0        | 0.662467 | 0        | 0        | 1.07889  | 0        | 0        | 0        | 0        | 1.035907 | 0.09889  | NA       | 0.162396 | NA       | 0.164429 | NA       |
| ATSG26320 | ATSG26320 | 0        | 0        | 0        | 0        | 0        | 0        | 0        | 1.07889  | 0        | 0        | 0        | 2.071813 | 0        | NA       | 0.150233 | NA       | 0.295662 | NA       |
| ATSG26330 | ATSG26330 | 26.15589 | 24.97944 | 38.62963 | 14.02213 | 9.274542 | 5.981045 | 11.56095 | 10.7889  | 11.714   |          |          |          |          |          |          |          |          |          |

|           |           |          |          |          |          |          |          |          |          |          |          |          |          |          |          |           |          |          |          |
|-----------|-----------|----------|----------|----------|----------|----------|----------|----------|----------|----------|----------|----------|----------|----------|----------|-----------|----------|----------|----------|
| ATSG26820 | IREG3     | 613.4744 | 640.5443 | 579.4445 | 409.9411 | 437.8909 | 428.6415 | 571.8221 | 576.1272 | 484.218  | 569.0046 | 597.32   | 552.1382 | -0.51703 | 0.000014 | -0.16427  | 0.247424 | -0.09174 | 0.712194 |
| ATSG26830 | THRRS     | 753.7651 | 685.1505 | 620.6494 | 621.5103 | 618.082  | 654.9244 | 604.7264 | 661.3595 | 556.4602 | 527.7446 | 492.2236 | 650.5493 | -0.12035 | 0.482315 | -0.17504  | 0.308636 | -0.29636 | 1.86928  |
| ATSG26840 | ATSG26840 | 0        | 0        | 0        | 0        | 0        | 0        | 0        | 0        | 0        | 0        | 0        | 0        | #N/A     | #N/A     | #N/A      | #N/A     | #N/A     | #N/A     |
| ATSG26848 | ATSG26848 | 0        | 0        | 0        | 0        | 0        | 0        | 0        | 0        | 0        | 0        | 0        | 0        | #N/A     | #N/A     | #N/A      | #N/A     | #N/A     | #N/A     |
| ATSG26850 | ATSG26850 | 593.2631 | 492.4519 | 479.0074 | 372.8237 | 346.4704 | 383.7837 | 335.2674 | 391.637  | 225.5128 | 428.9124 | 432.3585 | 489.9838 | -0.49444 | 0.010765 | -0.7014   | 0.000261 | -0.20769 | 0.555713 |
| ATSG26860 | LON1      | 242.5364 | 171.2876 | 182.8469 | 225.1789 | 257.6998 | 276.1249 | 259.6766 | 270.8014 | 222.5841 | 182.3118 | 158.3097 | 189.5709 | 0.324609 | 0.091254 | -0.138461 | 0.117136 | -0.17208 | 0.630055 |
| ATSG26880 | AGL26     | 267.5034 | 344.3595 | 325.7765 | 447.0585 | 390.8557 | 420.6668 | 426.8657 | 438.0293 | 506.6717 | 343.5138 | 271.3881 | 360.4955 | 0.424058 | 0.010321 | 0.544545  | 0.000958 | 0.065909 | 0.865151 |
| ATSG26890 | ATSG26890 | 0        | 0        | 0.412416 | 0        | 0        | 0        | 0        | 0        | 0        | 0        | 0        | 0        | 0.095918 | NA       | 0         | NA       | 0        | NA       |
| ATSG26900 | CDC20-4   | 0        | 1.784246 | 0        | 0        | 0        | 0        | 0        | 0        | 1.07889  | 0        | 0        | 0        | -0.26712 | NA       | -0.06363  | NA       | -0.24374 | NA       |
| ATSG26910 | ATSG26910 | 330.5153 | 315.8115 | 251.0926 | 161.2545 | 184.1659 | 202.3587 | 159.1853 | 217.9358 | 227.4653 | 216.8551 | 236.7994 | 249.6535 | -0.70266 | 0.000129 | -0.55803  | 0.003982 | -0.34297 | 0.248204 |
| ATSG26912 | ATSG26912 | 0        | 0        | 0        | 0        | 0        | 0        | 0        | 0        | 0        | 0        | 0        | 0        | #N/A     | #N/A     | #N/A      | #N/A     | #N/A     | #N/A     |
| ATSG26920 | CBP60G    | 145.0463 | 242.6575 | 164.8198 | 987.7353 | 853.2578 | 1247.048 | 1416.66  | 1539.576 | 1041.654 | 87.31774 | 105.0964 | 117.0574 | 2.406646 | 3.44E-30 | 2.768817  | 7.81E-40 | -0.78671 | 0.010709 |
| ATSG26930 | GATA23    | 0        | 0        | 0        | 1.649662 | 1.324935 | 0.996841 | 0        | 1.07889  | 1.952492 | 0        | 0        | 1.035907 | 0.695977 | NA       | 0.492887  | NA       | 0.163621 | NA       |
| ATSG26940 | DPD1      | 177.1467 | 214.1095 | 198.2988 | 219.4051 | 216.6268 | 237.2481 | 225.8831 | 190.9635 | 168.8906 | 236.0458 | 210.1928 | 191.6427 | 0.191236 | 0.320006 | -0.00059  | 0.998157 | 0.119369 | 0.741406 |
| ATSG26950 | AGL93     | 0        | 1.784246 | 0        | 0.412416 | 0        | 0        | 0        | 0        | 2.878607 | 2.660668 | 0        | 0        | -0.23511 | NA       | -0.30111  | NA       | 0.55022  | NA       |
| ATSG26960 | ATSG26960 | 128.4016 | 114.1917 | 140.3543 | 122.8998 | 103.3449 | 105.6651 | 59.58333 | 105.7312 | 104.4583 | 121.861  | 125.0514 | 103.5907 | -0.19769 | 0.458968 | -0.49905  | 0.048381 | -0.13013 | 0.794537 |
| ATSG26970 | ATSG26970 | 1.188904 | 3.568492 | 0        | 0        | 0.662467 | 1.993682 | 0        | 2.15778  | 0        | 0.959536 | 0        | 1.035907 | -0.26487 | 0.704585 | -0.10161  | 0.670019 | -0.29269 | NA       |
| ATSG26980 | SYPA1     | 149.8019 | 144.5239 | 168.6827 | 224.3541 | 206.0273 | 234.2576 | 192.9789 | 160.7546 | 151.3181 | 169.8378 | 174.2738 | 155.386  | 0.506122 | 0.002745 | -0.121415 | 0.583774 | 0.010206 | 0.789038 |
| ATSG26990 | DI19-6    | 170.0133 | 169.5034 | 212.463  | 289.9281 | 308.0473 | 320.9827 | 316.592  | 271.8803 | 309.47   | 211.0978 | 184.9164 | 205.1095 | 0.715378 | 2.29E-06 | 0.687676  | 0.00001  | 0.119981 | 0.719342 |
| ATSG27000 | ATK4      | 26.15589 | 21.41095 | 14.1642  | 27.63184 | 27.16116 | 23.92418 | 29.34701 | 31.28781 | 21.47741 | 18.23118 | 25.27635 | 20.71813 | 0.326675 | 0.42335  | 0.369122  | 0.394492 | 0.032438 | 0.976106 |
| ATSG27010 | ATSG27010 | 2.377808 | 0        | 0        | 1.649662 | 2.649869 | 0        | 0.889303 | 2.15778  | 1.952492 | 1.919071 | 1.330334 | 0        | 0.261433 | 0.730052 | 0.29869   | 0.699889 | 0.075458 | NA       |
| ATSG27020 | ATSG27020 | 0        | 0        | 1.287654 | 2.062078 | 2.649869 | 1.993682 | 1.778607 | 1.07889  | 2.928738 | 1.919071 | 0        | 1.035907 | 0.756743 | 0.261758 | 0.618103  | 0.391843 | 0.247146 | NA       |
| ATSG27030 | TPR3      | 216.3805 | 214.1095 | 151.9432 | 256.1101 | 224.5764 | 308.0238 | 224.9938 | 271.8803 | 147.4131 | 180.3927 | 175.6041 | 145.0269 | 0.420572 | 0.094494 | 0.140905  | 0.650372 | -0.20691 | 0.659653 |
| ATSG27035 | ATSG27035 | 0        | 0        | 0        | 0        | 0        | 0        | 0        | 0        | 0        | 0        | 0        | 0        | #N/A     | #N/A     | #N/A      | #N/A     | #N/A     | #N/A     |
| ATSG27037 | ATSG27037 | 1.188904 | 0        | 1.287654 | 1.237247 | 2.649869 | 0.996841 | 3.557214 | 0        | 1.952492 | 0.959536 | 0        | 1.035907 | 0.318016 | 0.669885 | 0.396912  | 0.600302 | -0.10378 | NA       |
| ATSG27043 | ATSG27043 | 1.188904 | 0        | 0        | 0        | 0        | 0        | 0        | 0        | 0.959536 | 0        | 0        | 0        | -0.21179 | NA       | -0.19779  | NA       | -0.02864 | NA       |
| ATSG27050 | AGL101    | 0        | 0        | 0        | 0        | 0        | 0        | 0        | 0        | 0        | 0        | 0        | 0        | 0        | NA       | 0         | NA       | 0.172362 | NA       |
| ATSG27060 | AIPLP53   | 23.77808 | 30.33218 | 34.76667 | 86.60727 | 81.48347 | 97.6904  | 61.36194 | 59.33895 | 38.07359 | 15.35257 | 18.62468 | 12.43088 | 1.503442 | 8.8E-08  | 0.790327  | 0.013286 | -0.84368 | 0.090007 |
| ATSG27070 | AGL53     | 0        | 0        | 1.287654 | 0.412416 | 0        | 0        | 0        | 0        | 0        | 0        | 0        | 0        | -0.11886 | NA       | -0.20136  | NA       | -0.19779 | NA       |
| ATSG27080 | CDC20-3   | 0        | 0        | 0        | 0        | 0        | 0        | 0.889303 | 0        | 0        | 0        | 0        | 0        | 0        | NA       | 0.160764  | NA       | 0        | NA       |
| ATSG27090 | AGL54     | 0        | 0        | 0        | 0        | 0        | 0        | 0        | 0        | 0        | 0        | 0        | 0        | #N/A     | #N/A     | #N/A      | #N/A     | #N/A     | #N/A     |
| ATSG27095 | ATSG27095 | 0        | 0        | 0        | 0        | 0        | 0        | 0        | 0        | 0        | 0        | 0        | 1.035907 | 0        | NA       | 0         | NA       | 0.172362 | NA       |
| ATSG27100 | GLR2.1    | 53.00068 | 55.31163 | 63.09506 | 32.16841 | 29.81103 | 34.88943 | 41.79726 | 36.1211  | 40.3005  | 50.55269 | 46.61579 | 0        | -0.79773 | 0.002479 | -0.44886  | 0.13271  | -0.31661 | 0.511123 |
| ATSG27110 | PCMP-E14  | 19.02246 | 28.54794 | 15.45185 | 19.38353 | 19.21155 | 22.92734 | 39.12935 | 32.3667  | 38.1113  | 25.90746 | 13.30334 | 20.71813 | -0.01833 | 0.971072 | 0.643543  | 0.108051 | -0.01011 | 0.928188 |
| ATSG27120 | NOPS-1    | 557.596  | 458.5512 | 494.4593 | 408.7038 | 521.3617 | 421.6636 | 349.4963 | 348.4815 | 579.8901 | 408.7622 | 409.7429 | 582.1795 | -0.15651 | 0.563199 | -0.23459  | 0.387703 | -0.10598 | 0.836652 |
| ATSG27130 | AGL39     | 1.188904 | 0        | 0        | 0.412416 | 0        | 0        | 0        | 0        | 0        | 0        | 0        | 0        | -0.10956 | NA       | -0.19067  | NA       | -0.18704 | NA       |
| ATSG27140 | NOPS-3    | 1.188904 | 0        | 1.287654 | 0.412416 | 0.662467 | 0        | 1.778607 | 2.15778  | 1.952492 | 0        | 1.330334 | 1.035907 | -0.3511  | 0.619472 | -0.480136 | 0.504219 | -0.07613 | NA       |
| ATSG27150 | NHX1      | 853.633  | 783.284  | 665.7173 | 434.2736 | 392.1806 | 541.2845 | 653.6381 | 647.334  | 421.7383 | 640.9698 | 603.9716 | 683.6983 | -0.73584 | 0.000119 | -0.40805  | 0.052455 | -0.24868 | 0.469967 |
| ATSG27160 | ATSG27160 | 0        | 0        | 0        | 0.662467 | 0        | 0        | 1.07889  | 0        | 0        | 0        | 0        | 1.035907 | 0.09889  | NA       | 0.162396  | NA       | 0.164429 | NA       |
| ATSG27170 | ATSG27170 | 0        | 0        | 0        | 0        | 0        | 0        | 0        | 0        | 0.959536 | 0        | 0        | 0        | 0        | NA       | 0         | NA       | 0.171512 | NA       |
| ATSG27180 | ATSG27180 | 1.188904 | 0        | 0        | 0        | 0        | 0        | 0        | 0        | 0        | 0        | 0        | 0        | -0.2184  | NA       | -0.20558  | NA       | -0.19918 | NA       |
| ATSG27190 | ATSG27190 | 0        | 0        | 0        | 0        | 0        | 0        | 0.889303 | 0        | 0        | 0        | 1.330334 | 0        | 0        | NA       | 0.141773  | NA       | 0.183636 | NA       |
| ATSG27200 | ACPS      | 1.188904 | 0        | 0        | 0        | 0        | 0        | 1.778607 | 0        | 0        | 0        | 0        | 0        | -0.21078 | NA       | 0.091088  | NA       | -0.1879  | NA       |
| ATSG27210 | ATSG27210 | 22.58917 | 44.60615 | 47.64321 | 44.12847 | 56.97219 | 52.83256 | 47.13308 | 34.52448 | 42.95482 | 48.93632 | 29.26735 | 43.50807 | 0.406345 | 0.235601 | 0.131991  | 0.761166 | 0.111164 | 0.883204 |
| ATSG27220 | ATSG27220 | 21.40027 | 17.84246 | 21.89012 | 4.124156 | 9.274542 | 7.974726 | 2.66791  | 8.63112  | 4.88123  | 16.31211 | 15.96401 | 15.5386  | -1.35053 | 0.002629 | -1.60002  | 0.000843 | -0.31316 | NA       |
| ATSG27230 | FRL5      | 8.322328 | 7.136984 | 6.438272 | 7.835896 | 3.312336 | 10.96525 | 10.67164 | 11.86779 | 6.833722 | 10.55489 | 9.312338 | 11.39497 | -0.0398  | 0.955322 | -0.32322  | 0.624138 | -0.40234 | NA       |
| ATSG27238 | ATSG27238 | 0        | 0        | 0        | 0        | 0        | 0        | 0        | 0        | 0        | 0        | 0        | 0        | #N/A     | #N/A     | #N/A      | #N/A     | #N/A     | #N/A     |
| ATSG27240 | ATSG27240 | 154.5575 | 180.2088 | 157.0938 | 68.8734  | 54.98478 | 99.68408 | 84.48383 | 118.6779 | 47.83605 | 155.4448 | 163.6311 | 147.0987 | -1.0882  | 7.42E-05 | -0.91832  | 0.001363 | -0.07044 | 0.920014 |
| ATSG27247 | ATSG27247 | 7.133244 | 5.352738 | 2.575309 | 0.824831 | 1.324935 | 0.996841 | 4.446517 | 2.15778  | 0        | 5.757214 | 3.991002 | 2.071813 | -1.22845 | 0.05719  | -0.68202  | 0.351893 | -0.20636 | NA       |
| ATSG27250 | ATSG27250 | 39.23383 | 33.90067 | 48.93086 | 23.09527 | 32.4609  | 22.92734 | 39.12935 | 45.31338 | 34.16861 | 33.58375 | 25.27635 | 35.22082 | -0.6088  | 0.057371 | -0.05158  | 0.905854 | -0.34905 | 0.545279 |
| ATSG27260 | ATSG27260 | 0        | 0        | 0        | 0        | 0        | 0        | 0        | 0        | 0        | 0        | 0        | 0        | #N/A     | #N/A     | #N/A      | #N/A     | #N/A     | #N/A     |
| ATSG27270 | EM8976    | 250.8587 | 244.4417 | 234.3531 | 148.0572 | 136.4683 | 158.4977 | 174.3035 | 192.0424 | 138.6269 | 245.6411 | 199.5501 | 231.0072 | -0.7101  | 1.92E-05 | -0.5222   | 0.003227 | -0.10261 | 0.778505 |
| ATSG27280 | ATSG27280 | 237.7808 | 378.2602 | 287.1469 | 327.458  | 368.3318 | 269.147  | 482.0025 | 438.0293 | 510.6027 | 318.5658 | 317.9498 | 391.5727 | 0.105086 | 0.670631 | 0.694757  | 0.000451 | 0.191544 | 0.612325 |
| ATSG27290 | ATSG27290 | 296.0371 | 415.7293 | 395.3099 | 218.5803 | 206.0273 | 184.4155 | 340.6032 | 340.9292 | 338.7574 | 480.7273 | 408.4125 | 515.8815 | -0.83335 | 2.02E-07 | -0.10934  | 0.606516 | 0.346967 | 0.15912  |
| ATSG27300 | ATSG27300 | 173.58   | 196.2671 | 169.9704 | 141.871  | 146.4053 | 133.5767 | 200.9826 | 147.8079 | 141.5557 | 183.2713 | 191.5681 | 194.7504 | -0.33932 | 0.074809 | -0.12525  | 0.589672 | 0.08112  | 0.847391 |
| ATSG27310 | ATSG27310 | 0        | 0        | 0        | 0        | 0        | 0        | 0.889303 | 0        | 0.959536 | 1.330334 | 0        | 0        | 0.162611 | NA       | 0.12611   | NA       | 0.377183 | NA       |
| ATSG27320 | GID1C     | 224.7028 | 249.7944 | 181.5593 | 141.3608 | 178.2037 | 198.3713 | 220.5473 | 212.5413 | 199.1542 | 158.3234 | 158.3097 | 152.2783 | -0.19812 | 0.269527 | -0.04339  | 0.850675 | -0.46753 | 0.038989 |
| ATSG27330 | ATSG27330 | 325.7597 | 146.3082 | 169.9704 | 191.871  | 176.2163 | 143.5451 | 127.1704 | 124.0723 | 158.1519 | 148.728  |          |          |          |          |           |          |          |          |

|           |           |          |          |          |          |          |          |          |          |          |          |          |          |          |          |          |          |          |          |
|-----------|-----------|----------|----------|----------|----------|----------|----------|----------|----------|----------|----------|----------|----------|----------|----------|----------|----------|----------|----------|
| AT5G27730 | AT5G27730 | 261.5589 | 319.38   | 334.7901 | 277.9681 | 314.672  | 321.9796 | 445.541  | 345.2448 | 306.5412 | 319.5254 | 303.3161 | 339.7773 | -0.0027  | 0.991445 | 0.260355 | 0.19728  | 0.074554 | 0.857418 |
| AT5G27740 | RF3       | 265.1256 | 366.1437 | 350.242  | 282.9171 | 330.5712 | 281.1091 | 318.3706 | 297.7736 | 308.4937 | 224.5313 | 270.0578 | 356.3518 | -0.09749 | 0.681749 | -0.05088 | 0.850854 | -0.16843 | 0.652663 |
| AT5G27750 | AT5G27750 | 63.01191 | 69.5856  | 45.0679  | 56.08852 | 57.63465 | 55.82308 | 73.81219 | 67.97007 | 70.28971 | 94.99403 | 81.15037 | 91.15977 | -0.05365 | 0.863781 | 0.260558 | 0.35716  | 0.587942 | 0.071412 |
| AT5G27760 | AT5G27760 | 181.9023 | 181.9931 | 199.5864 | 492.4242 | 428.6163 | 388.7679 | 518.4639 | 342.0081 | 512.5291 | 292.6584 | 327.2622 | 218.5763 | 1.18197  | 3.35E-09 | 1.246335 | 5.05E-10 | 0.549999 | 0.063833 |
| AT5G27770 | RP122C    | 739.4983 | 813.6162 | 906.5087 | 1250.032 | 1225.564 | 913.1062 | 816.3806 | 718.5407 | 1538.564 | 883.7323 | 879.3508 | 1051.445 | 0.443953 | 0.093424 | 0.308044 | 0.289405 | 0.186393 | 0.710734 |
| AT5G27771 | 0         | 0        | 0        | 0        | 0        | 0        | 0        | 0        | 0        | 0        | 0        | 0        | 0        | #N/A     | #N/A     | #N/A     | #N/A     | #N/A     | #N/A     |
| AT5G27780 | AT5G27780 | 28.53369 | 28.54794 | 33.47901 | 14.84696 | 18.54908 | 11.96209 | 8.893035 | 8.63112  | 12.6912  | 29.7456  | 30.59768 | 35.22082 | -0.89734 | 0.011724 | -1.40401 | 0.000254 | 0.073633 | 0.930902 |
| AT5G27790 | AT5G27790 | 0        | 0        | 0        | 0        | 0        | 0        | 0        | 0        | 0        | 0        | 0        | 0        | 0        | 1.330334 | 0        | 0        | 0.183636 | NA       |
| AT5G27800 | AT5G27800 | 0        | 0        | 0        | 0        | 0        | 0        | 0        | 0        | 0        | 0        | 0        | 0        | 0        | 1.330334 | 0        | 0        | 0.172362 | NA       |
| AT5G27807 | MIR164C   | 0        | 0        | 0        | 0        | 0        | 0        | 0.996841 | 0        | 0        | 0        | 0        | 0        | 0        | 0        | 0        | 0        | 0        | NA       |
| AT5G27810 | AT5G27810 | 1.188904 | 0        | 1.287654 | 0.412416 | 0        | 0        | 1.778607 | 1.07889  | 0        | 0.959536 | 1.330334 | 0        | -0.44961 | NA       | 0.057247 | NA       | -0.05979 | NA       |
| AT5G27820 | AT5G27820 | 61.82301 | 57.09587 | 42.49259 | 58.97543 | 82.80841 | 40.87047 | 62.25124 | 48.55005 | 105.4346 | 59.49121 | 83.81104 | 125.3447 | 0.16878  | 0.704019 | 0.38516  | 0.361588 | 0.670664 | 0.219504 |
| AT5G27830 | AT5G27830 | 166.4466 | 228.3835 | 193.1482 | 455.7192 | 518.7119 | 447.5815 | 309.4776 | 303.1681 | 362.1873 | 141.0517 | 174.2738 | 156.4219 | 1.264402 | 4.03E-16 | 0.727044 | 1.24E-05 | -0.30546 | 0.286759 |
| AT5G27840 | TOPP8     | 344.7821 | 367.5547 | 306.4617 | 312.611  | 398.1428 | 363.8469 | 416.194  | 390.5582 | 339.7336 | 284.0225 | 250.1028 | 302.4847 | 0.075307 | 0.708936 | 0.171306 | 0.374187 | -0.27271 | 0.304878 |
| AT5G27845 | AT5G27845 | 1.188904 | 1.784246 | 0        | 1.649662 | 2.649869 | 4.984204 | 5.335821 | 1.07889  | 1.952492 | 1.919071 | 2.660668 | 0        | 0.678879 | 0.330168 | 0.63885  | 0.387327 | 0.18218  | NA       |
| AT5G27850 | RP118C    | 2615.589 | 2724.544 | 2885.633 | 3199.108 | 3515.051 | 3388.262 | 2506.057 | 2585.02  | 4146.117 | 2588.827 | 1898.387 | 3134.653 | 0.287327 | 0.224804 | 0.162157 | 0.545698 | -0.10611 | 0.825789 |
| AT5G27860 | AT5G27860 | 303.1705 | 281.9109 | 279.421  | 533.2533 | 702.2153 | 484.4646 | 567.3756 | 487.6583 | 830.7853 | 308.0109 | 263.4061 | 361.5314 | 0.959589 | 8.07E-06 | 1.087547 | 3.84E-07 | 0.106732 | 0.836071 |
| AT5G27870 | PME28     | 1.188904 | 0        | 0        | 0        | 0        | 0        | 0.889303 | 0        | 0        | 0        | 0        | 0        | -0.20902 | NA       | -0.03919 | NA       | -0.19148 | NA       |
| AT5G27880 | AT5G27880 | 0        | 0        | 0        | 0        | 0        | 0        | 0        | 0        | 0        | 0        | 0        | 2.071813 | 0        | NA       | 0        | NA       | 0.262302 | NA       |
| AT5G27882 | AT5G27882 | 0        | 0        | 0        | 0        | 0        | 0        | 0        | 0        | 0.976246 | 0        | 0        | 0        | 0        | NA       | 0.16673  | NA       | 0        | NA       |
| AT5G27885 | AT5G27885 | 0        | 0        | 0        | 0        | 0        | 0        | 0        | 0        | 0.976246 | 0        | 0        | 0        | 0        | NA       | 0.16673  | NA       | 0        | NA       |
| AT5G27889 | AT5G27889 | 3.566712 | 1.784246 | 6.438272 | 2.886909 | 1.324935 | 3.987363 | 2.66791  | 2.15778  | 1.952492 | 4.797678 | 7.982004 | 6.215439 | -0.40003 | 0.57692  | -0.50233 | 0.501604 | 0.448599 | NA       |
| AT5G27890 | AT5G27890 | 58.25629 | 46.3904  | 52.79383 | 30.93117 | 37.09817 | 27.91154 | 31.12562 | 58.26006 | 43.93107 | 42.21957 | 51.88302 | 50.75942 | -0.67687 | 0.022807 | -0.24652 | 0.492552 | -0.12768 | 0.850046 |
| AT5G27895 | AT5G27895 | 20.21137 | 16.05821 | 7.725926 | 5.361402 | 3.312336 | 10.96525 | 4.446517 | 8.63112  | 7.809968 | 3.838143 | 11.97301 | 7.251346 | -0.97036 | 0.0737   | -0.84855 | 0.148201 | -0.7625  | NA       |
| AT5G27900 | AT5G27900 | 0        | 0        | 0        | 0        | 0.662467 | 0        | 0.889303 | 0        | 0        | 0        | 0        | 0        | 0.097058 | NA       | 0.130384 | NA       | 0        | NA       |
| AT5G27902 | AT5G27902 | 1.188904 | 3.568492 | 0        | 0        | 0.662467 | 0.996841 | 1.778607 | 1.07889  | 0        | 0        | 2.660668 | 1.035907 | -0.46084 | 0.495149 | -0.1869  | 0.811671 | -0.10537 | NA       |
| AT5G27905 | AT5G27905 | 0        | 0        | 0        | 0.412416 | 0        | 0        | 1.778607 | 0        | 0.976246 | 0        | 0        | 0        | 0.06212  | NA       | 0.46701  | NA       | 0        | NA       |
| AT5G27910 | NYFC8     | 5.94452  | 1.784246 | 0        | 1.649662 | 2.649869 | 0        | 1.778607 | 1.07889  | 0.976246 | 0        | 1.330334 | 1.035907 | -0.34033 | 0.651981 | -0.43339 | 0.56906  | -0.65486 | NA       |
| AT5G27920 | AT5G27920 | 114.1348 | 121.3287 | 118.4642 | 113.0011 | 123.2189 | 118.6241 | 100.4913 | 111.1257 | 88.83839 | 81.56053 | 93.12338 | 114.9856 | 0.004365 | 0.987711 | -0.22932 | 0.339462 | -0.27894 | 0.43165  |
| AT5G27925 | AT5G27925 | 0        | 0        | 0.412416 | 2.649869 | 0        | 2.66791  | 1.07889  | 0        | 0.959536 | 0        | 1.035907 | 0        | 0.478069 | NA       | 0.556792 | NA       | 0.310412 | NA       |
| AT5G27927 | SADHU5-2  | 0        | 0        | 0        | 0        | 0        | 0        | 0        | 0        | 0        | 0        | 0        | 0        | #N/A     | #N/A     | #N/A     | #N/A     | #N/A     | #N/A     |
| AT5G27930 | PPC6-7    | 269.8812 | 258.7157 | 270.4074 | 351.7905 | 331.2336 | 357.8658 | 398.408  | 359.2703 | 466.6456 | 308.9705 | 232.8084 | 284.8743 | 0.372735 | 0.022229 | 0.604769 | 0.000131 | 0.052288 | 0.893141 |
| AT5G27940 | WPP3      | 1.188904 | 0        | 0        | 0.824831 | 0        | 0        | 0.889303 | 1.07889  | 0.976246 | 0.959536 | 1.330334 | 0        | -0.10713 | NA       | 0.275235 | NA       | 0.150126 | NA       |
| AT5G27944 | AT5G27944 | 0        | 0        | 0        | 0        | 0        | 0        | 0        | 0        | 0        | 0        | 0        | 0        | #N/A     | #N/A     | #N/A     | #N/A     | #N/A     | #N/A     |
| AT5G27945 | CD20-6    | 0        | 0        | 0        | 0        | 0        | 0        | 0        | 0        | 0        | 0        | 0        | 0        | #N/A     | #N/A     | #N/A     | #N/A     | #N/A     | #N/A     |
| AT5G27947 | AT5G27947 | 0        | 0        | 0.412416 | 0        | 0        | 0        | 1.07889  | 0        | 0        | 0        | 0        | 0        | 0.064603 | NA       | 0.150774 | NA       | 0        | NA       |
| AT5G27950 | AT5G27950 | 1399.34  | 1443.455 | 1323.709 | 1200.129 | 1178.529 | 1399.564 | 1586.517 | 1461.896 | 1065.084 | 1416.275 | 1543.187 | 1441.982 | -0.1397  | 0.447515 | -0.01758 | 0.93877  | 0.077892 | 0.825781 |
| AT5G27960 | AGL90     | 0        | 0        | 0        | 0        | 0        | 0        | 0        | 1.07889  | 0        | 0        | 0        | 0        | 0        | NA       | 0.16673  | NA       | 0        | NA       |
| AT5G27965 | AT5G27965 | 1.188904 | 0        | 0        | 0        | 0        | 0        | 0        | 0        | 0        | 0        | 1.330334 | 1.035907 | -0.27792 | NA       | -0.24566 | NA       | 0.172077 | NA       |
| AT5G27967 | AT5G27967 | 0        | 0        | 0        | 0        | 0        | 0        | 0        | 0        | 0        | 0        | 0        | 0        | #N/A     | #N/A     | #N/A     | #N/A     | #N/A     | #N/A     |
| AT5G27970 | AT5G27970 | 716.9091 | 642.3286 | 630.9506 | 409.9411 | 394.8305 | 525.3351 | 499.7886 | 596.6261 | 369.9972 | 566.126  | 582.6863 | 551.1023 | -0.57342 | 0.001771 | -0.43245 | 0.026801 | -0.22345 | 0.497299 |
| AT5G27980 | AT5G27980 | 2.377808 | 0        | 1.287654 | 0.824831 | 0        | 0        | 0.889303 | 2.15778  | 0.976246 | 0        | 0        | 0        | -0.50061 | NA       | 0.041739 | NA       | -0.65818 | NA       |
| AT5G27990 | AT5G27990 | 159.3131 | 151.6609 | 160.9568 | 176.1015 | 207.3523 | 152.5166 | 160.9639 | 153.2024 | 215.7504 | 152.5662 | 127.7121 | 155.386  | 0.18217  | 0.425436 | 0.161372 | 0.515131 | -0.10944 | 0.805161 |
| AT5G28000 | AT5G28000 | 1.188904 | 0        | 0        | 0.412416 | 0        | 0        | 0        | 0        | 0        | 0        | 0        | 0        | -0.10956 | NA       | -0.19067 | NA       | -0.18704 | NA       |
| AT5G28010 | AT5G28010 | 4.755616 | 5.352738 | 6.438272 | 15.67179 | 12.58688 | 11.96209 | 20.45398 | 10.7889  | 24.40615 | 2.878607 | 15.96401 | 6.215439 | 0.973203 | 0.06952  | 1.359471 | 0.010293 | 0.348992 | NA       |
| AT5G28020 | CYS2D     | 765.6541 | 995.6093 | 824.0988 | 352.2029 | 367.0069 | 390.7616 | 355.7214 | 353.8759 | 355.3535 | 872.2179 | 879.3508 | 903.3105 | -1.25058 | 5.29E-24 | -1.25988 | 4.48E-25 | 0.043179 | 0.88483  |
| AT5G28030 | DES1      | 143.8574 | 164.1506 | 158.3815 | 250.7487 | 236.5008 | 168.4661 | 158.296  | 120.8357 | 135.6982 | 219.7337 | 164.9614 | 217.5404 | 0.491939 | 0.020355 | -0.15765 | 0.555945 | 0.366792 | 0.274584 |
| AT5G28040 | AT5G28040 | 252.0476 | 242.6575 | 226.6272 | 177.7511 | 178.8662 | 185.4124 | 206.3184 | 204.9891 | 220.6316 | 198.6239 | 160.9704 | 218.5763 | -0.40811 | 0.010333 | -0.18752 | 0.315269 | -0.30612 | 0.220246 |
| AT5G28050 | AT5G28050 | 511.2287 | 503.1574 | 553.6914 | 653.6787 | 552.4977 | 599.1013 | 600.2799 | 586.9161 | 683.3722 | 616.9814 | 685.122  | 518.9893 | 0.20082  | 0.209485 | 0.249922 | 0.12556  | 0.209328 | 0.403457 |
| AT5G28052 | AT5G28052 | 0        | 0        | 0        | 0        | 0        | 0        | 0        | 0        | 0        | 0        | 0        | 0        | #N/A     | #N/A     | #N/A     | #N/A     | #N/A     | #N/A     |
| AT5G28053 | AT5G28053 | 0        | 1.784246 | 0        | 0        | 0.662467 | 0        | 0        | 0        | 0        | 0        | 0        | 1.035907 | -0.13784 | NA       | -0.26068 | NA       | -0.06605 | NA       |
| AT5G28056 | AT5G28056 | 1.188904 | 1.784246 | 0        | 0        | 0        | 0        | 1.778607 | 0        | 0.959536 | 0        | 0        | 0        | -0.51641 | NA       | -0.12123 | NA       | -0.26445 | NA       |
| AT5G28060 | RPS248    | 1845.179 | 1905.575 | 2284.299 | 2787.104 | 2739.302 | 2384.443 | 1811.511 | 1810.377 | 3165.966 | 1800.089 | 1560.482 | 2284.174 | 0.37765  | 0.113341 | 0.163796 | 0.558494 | -0.09299 | 0.857418 |
| AT5G28065 | AT5G28065 | 0        | 3.568492 | 0        | 0        | 0        | 0        | 0.889303 | 1.07889  | 0        | 0        | 0        | 0        | -0.53745 | NA       | -0.135   | NA       | -0.48579 | NA       |
| AT5G28067 | AT5G28067 | 0        | 0        | 0        | 0        | 0        | 0        | 0        | 0        | 0        | 0        | 0        | 0        | #N/A     | #N/A     | #N/A     | #N/A     | #N/A     | #N/A     |
| AT5G28070 | AT5G28070 | 0        | 0        | 0        | 0.662467 | 0        | 0        | 0        | 0        | 0        | 0        | 0        | 0        | 0.128567 | NA       | 0        | NA       | 0        | NA       |
| AT5G28073 | AT5G28073 | 0        | 0        | 0        | 0        | 0        | 0        | 0        | 0        | 0        | 0        | 0        | 0        | #N/A     | #N/A     | #N/A     | #N/A     | #N/A     | #N/A     |
| AT5G28076 | AT5G28076 | 0        | 0        | 0        | 0        | 0        | 0        | 0.889303 | 1.07889  | 0.976246 | 0        | 0        | 1.035907 | 0        | NA       | 0.54562  | NA       | 0.198653 | NA       |
| AT5G28080 | WNK9      | 1.188904 | 3.568492 | 2.575309 | 0.412416 | 1.324935 | 1.993682 | 7.114428 | 4.31556  | 5.857476 | 0.959536 | 3.991002 | 3.10772  | -0.57279 | 0.425436 | 0.856282 | 0.221334 | 0.073949 | NA       |
| AT5G28085 |           |          |          |          |          |          |          |          |          |          |          |          |          |          |          |          |          |          |          |

|           |           |          |          |          |          |          |          |          |          |          |          |          |          |          |          |          |          |          |          |
|-----------|-----------|----------|----------|----------|----------|----------|----------|----------|----------|----------|----------|----------|----------|----------|----------|----------|----------|----------|----------|
| AT5G28350 | AT5G28350 | 510.0398 | 467.4725 | 432.6519 | 305.5999 | 333.8835 | 426.6479 | 512.2388 | 503.8416 | 342.6623 | 438.5078 | 383.1362 | 441.2962 | -0.40051 | 0.043992 | -0.05267 | 0.844736 | -0.15417 | 0.685108 |
| AT5G28360 | ACS3      | 2.377808 | 3.568492 | 2.575309 | 1.649662 | 0        | 1.993682 | 0        | 1.07889  | 1.952492 | 3.838143 | 2.660668 | 5.179533 | -0.60555 | 0.397765 | -0.65697 | 0.375572 | 0.326863 | NA       |
| AT5G28370 | AT5G28370 | 86.78999 | 66.0171  | 66.95803 | 53.20161 | 45.04777 | 52.83256 | 48.91169 | 53.9445  | 66.38473 | 47.97678 | 78.4897  | 49.72351 | -0.52395 | 0.054895 | -0.36887 | 0.227912 | -0.33103 | 0.487505 |
| AT5G28380 | AT5G28380 | 16.64466 | 8.92123  | 18.02716 | 15.25938 | 16.56168 | 10.96525 | 15.11816 | 11.86779 | 16.59618 | 13.4335  | 18.62468 | 10.35907 | -0.0338  | 0.953758 | -0.02829 | 0.96358  | -0.08614 | NA       |
| AT5G28390 | AT5G28390 | 43.98945 | 64.23286 | 60.51975 | 40.82914 | 39.08557 | 52.83256 | 24.01119 | 49.62894 | 27.33489 | 71.96517 | 65.18636 | 50.75942 | -0.32778 | 0.334854 | -0.69188 | 0.039477 | 0.159409 | 0.808921 |
| AT5G28400 | AT5G28400 | 159.3131 | 255.1472 | 190.5728 | 63.92441 | 52.99738 | 97.6904  | 108.495  | 144.5713 | 72.2422  | 179.4332 | 154.3187 | 191.6427 | -1.42484 | 1.05E-07 | -0.84366 | 0.003059 | -0.18362 | 0.748116 |
| AT5G28405 | AT5G28405 | 2.377808 | 0        | 0        | 0        | 1.324935 | 0        | 0.889303 | 0        | 0        | 0        | 1.330334 | 0        | -0.15662 | NA       | -0.21601 | NA       | -0.16896 | NA       |
| AT5G28410 | AT5G28410 | 0        | 0        | 0        | 0        | 0        | 0        | 0        | 0        | 0        | 0.959536 | 1.330334 | 1.035907 | 0        | NA       | 0        | NA       | 0.604134 | NA       |
| AT5G28415 | AT5G28415 | 16.64466 | 8.92123  | 16.73951 | 4.948987 | 3.974804 | 6.977885 | 6.225124 | 6.47334  | 2.928738 | 9.595356 | 10.64267 | 8.287252 | -1.20842 | 0.015267 | -1.17227 | 0.028518 | -0.50462 | NA       |
| AT5G28420 | AT5G28420 | 2.377808 | 0        | 0        | 0.824831 | 0        | 0        | 0.889303 | 0        | 0.976246 | 0        | 0        | 1.035907 | -0.25612 | NA       | -0.08252 | NA       | -0.2184  | NA       |
| AT5G28430 | AT5G28430 | 10.70014 | 8.92123  | 2.575309 | 7.011065 | 3.312336 | 5.981045 | 4.446517 | 5.39445  | 4.88123  | 10.55489 | 5.321336 | 7.251346 | -0.31117 | 0.639901 | -0.42505 | 0.540171 | 0.077343 | NA       |
| AT5G28440 | AT5G28440 | 3.566712 | 1.784246 | 2.575309 | 1.649662 | 1.324935 | 3.987363 | 0.889303 | 0        | 0.976246 | 0.959536 | 3.991002 | 3.10772  | -0.14727 | 0.857951 | -0.8157  | 0.253345 | -0.01772 | NA       |
| AT5G28442 | AT5G28442 | 16.64466 | 14.27397 | 27.04074 | 18.14629 | 14.57428 | 15.94945 | 18.67537 | 10.7889  | 14.64369 | 27.82653 | 15.96401 | 18.64632 | -0.22974 | 0.636478 | -0.35026 | 0.489485 | 0.097622 | 0.92333  |
| AT5G28450 | AT5G28450 | 1526.553 | 1584.41  | 1511.706 | 890.8176 | 860.545  | 692.8043 | 731.8968 | 786.5108 | 1286.692 | 1253.154 | 1056.285 | 1419.192 | -0.89057 | 1.29E-05 | -0.69929 | 0.000964 | -0.30018 | 0.399667 |
| AT5G28460 | AT5G28460 | 76.08985 | 57.09587 | 61.80741 | 58.1506  | 68.23413 | 58.81361 | 55.13682 | 75.5223  | 60.52725 | 44.13864 | 58.53469 | 61.11849 | -0.08349 | 0.794234 | -0.04478 | 0.901066 | -0.25934 | 0.593967 |
| AT5G28463 | AT5G28463 | 0        | 0        | 0        | 0.412416 | 0        | 0.996841 | 0        | 0        | 0        | 0        | 0        | 1.035907 | 0.245858 | NA       | 0        | NA       | 0.179036 | NA       |
| AT5G28464 | AT5G28464 | 0        | 0        | 0        | 0        | 0        | 0        | 0        | 0        | 0        | 0        | 0        | 0        | #N/A     | #N/A     | #N/A     | #N/A     | #N/A     | #N/A     |
| AT5G28465 | AT5G28465 | 0        | 0        | 0        | 0        | 0        | 0        | 0        | 0        | 0        | 0        | 0        | 0        | #N/A     | #N/A     | #N/A     | #N/A     | #N/A     | #N/A     |
| AT5G28466 | AT5G28466 | 0        | 0        | 0        | 0        | 0        | 0        | 0        | 0        | 0        | 0        | 0        | 1.035907 | 0        | NA       | 0        | NA       | 0.172362 | NA       |
| AT5G28468 | AT5G28468 | 1.188904 | 0        | 0        | 0        | 0        | 0        | 0        | 0        | 0        | 0        | 0        | 0        | -0.2184  | NA       | -0.20558 | NA       | -0.19918 | NA       |
| AT5G28469 | AT5G28469 | 0        | 0        | 0        | 0        | 0        | 0        | 0        | 0        | 0.976246 | 0        | 0        | 0        | 0        | NA       | 0.16673  | NA       | 0        | NA       |
| AT5G28470 | NPF_8     | 1.188904 | 1.784246 | 0        | 0        | 0        | 0        | 0        | 0        | 0        | 1.919071 | 2.660668 | 1.035907 | -0.64758 | NA       | -0.55712 | NA       | 0.425879 | NA       |
| AT5G28480 | AT5G28480 | 0        | 0        | 0        | 0        | 0        | 0        | 0        | 0        | 0        | 0        | 0        | 0        | #N/A     | #N/A     | #N/A     | #N/A     | #N/A     | #N/A     |
| AT5G28482 | AT5G28482 | 0        | 0        | 0        | 0        | 0        | 0        | 0        | 0        | 0        | 0        | 0        | 0        | #N/A     | #N/A     | #N/A     | #N/A     | #N/A     | #N/A     |
| AT5G28484 | AT5G28484 | 0        | 0        | 0        | 0        | 0        | 0        | 0        | 0        | 0        | 0        | 0        | 0        | #N/A     | #N/A     | #N/A     | #N/A     | #N/A     | #N/A     |
| AT5G28487 | AT5G28487 | 1.188904 | 0        | 0        | 0        | 0.662467 | 0.996841 | 1.778607 | 0        | 0        | 1.919071 | 1.330334 | 0        | 0.00584  | NA       | 0.079133 | NA       | 0.282145 | NA       |
| AT5G28490 | LSH1      | 85.60108 | 80.29107 | 77.25926 | 70.11065 | 64.92179 | 59.81045 | 48.02239 | 63.65451 | 64.43224 | 80.60099 | 102.4357 | 67.33392 | -0.29857 | 0.249794 | -0.45366 | 0.089486 | 0.028646 | 0.965132 |
| AT5G28491 | AT5G28491 | 0        | 0        | 0        | 0        | 0        | 0        | 0        | 0        | 0        | 0        | 0        | 0        | #N/A     | #N/A     | #N/A     | #N/A     | #N/A     | #N/A     |
| AT5G28495 | AT5G28495 | 0        | 0        | 0        | 0.412416 | 0        | 0        | 0.889303 | 0        | 0        | 0        | 1.330334 | 0        | 0.065278 | NA       | 0.149821 | NA       | 0.193775 | NA       |
| AT5G28497 | AT5G28497 | 0        | 0        | 0        | 0        | 0        | 0        | 0        | 0        | 0        | 0        | 0        | 0        | #N/A     | #N/A     | #N/A     | #N/A     | #N/A     | #N/A     |
| AT5G28500 | RAF1      | 1412.418 | 1172.25  | 999.2198 | 784.002  | 749.2505 | 668.8802 | 840.3918 | 1001.21  | 1684.024 | 1147.605 | 1069.589 | 1075.271 | -0.67746 | 0.003091 | -0.0232  | 0.943691 | -0.11825 | 0.812628 |
| AT5G28510 | BGLU24    | 0        | 0        | 0        | 0        | 0        | 0        | 0        | 0        | 0        | 0        | 0        | 0        | 0        | NA       | 0        | NA       | 0.172362 | NA       |
| AT5G28515 | AT5G28515 | 0        | 0        | 0        | 0        | 0        | 0        | 0        | 0        | 0        | 0        | 0        | 0        | #N/A     | #N/A     | #N/A     | #N/A     | #N/A     | #N/A     |
| AT5G28520 | JAL40     | 0        | 0        | 0        | 0        | 0        | 0        | 0        | 0        | 0        | 0        | 0        | 0        | #N/A     | #N/A     | #N/A     | #N/A     | #N/A     | #N/A     |
| AT5G28523 | AT5G28523 | 1.188904 | 0        | 0        | 0        | 0        | 0        | 0.889303 | 0        | 0        | 0        | 0        | 0        | -0.20902 | NA       | -0.03919 | NA       | -0.19148 | NA       |
| AT5G28524 | AT5G28524 | 0        | 0        | 0        | 0.412416 | 0        | 0        | 0        | 0        | 0        | 0        | 0        | 0        | 0.095918 | NA       | 0        | NA       | 0        | NA       |
| AT5G28525 | AT5G28525 | 0        | 0        | 0        | 0        | 0        | 0.889303 | 0        | 0        | 0        | 0        | 0        | 0        | 0        | NA       | 0.160764 | NA       | 0        | NA       |
| AT5G28526 | AT5G28526 | 0        | 0        | 1.287654 | 0        | 1.324935 | 0        | 1.778607 | 1.07889  | 0.976246 | 0        | 0        | 0        | -0.01775 | NA       | 0.396285 | NA       | -0.25942 | NA       |
| AT5G28527 | AT5G28527 | 1.188904 | 0        | 0        | 0        | 0.662467 | 0        | 1.778607 | 0        | 0        | 0        | 0        | 0        | -0.21078 | NA       | 0.091088 | NA       | -0.1879  | NA       |
| AT5G28530 | FR510     | 76.08985 | 103.4863 | 68.24568 | 72.99756 | 67.51766 | 71.77254 | 84.48383 | 90.62675 | 62.47974 | 71.00564 | 77.15937 | 87.01615 | -0.19487 | 0.478419 | -0.04071 | 0.904452 | -0.05402 | 0.929369 |
| AT5G28535 | AT5G28535 | 1.188904 | 0        | 0        | 0.662467 | 0        | 0.889303 | 0        | 0        | 0        | 0        | 0        | 0        | -0.09199 | NA       | -0.04588 | NA       | -0.20606 | NA       |
| AT5G28540 | MED37A    | 1736.989 | 1439.887 | 1303.106 | 4154.674 | 3866.159 | 4294.39  | 2856.443 | 3623.991 | 3947.939 | 1207.096 | 1150.739 | 1193.364 | 1.4356   | 4.08E-24 | 1.199081 | 5.53E-17 | -0.33031 | 0.15333  |
| AT5G28545 | AT5G28545 | 0        | 1.784246 | 0        | 0        | 0        | 0        | 1.778607 | 0        | 0        | 0.959536 | 0        | 2.071813 | -0.33367 | NA       | 0.052654 | NA       | 0.235244 | NA       |
| AT5G28550 | AT5G28550 | 0        | 0        | 0        | 0        | 0        | 0        | 0        | 0        | 0        | 0        | 1.330334 | 0        | 0        | NA       | 0        | NA       | 0.172362 | NA       |
| AT5G28560 | AT5G28560 | 0        | 0        | 0        | 0        | 0        | 0        | 0        | 0        | 0        | 0        | 0        | 0        | #N/A     | #N/A     | #N/A     | #N/A     | #N/A     | #N/A     |
| AT5G28570 | AT5G28570 | 0        | 0        | 0        | 0        | 0        | 0        | 0        | 0        | 0        | 0        | 0        | 0        | #N/A     | #N/A     | #N/A     | #N/A     | #N/A     | #N/A     |
| AT5G28580 | AT5G28580 | 1.188904 | 1.784246 | 0        | 0        | 0        | 0.889303 | 0        | 0        | 0        | 0        | 0        | 0        | -0.51815 | NA       | -0.28593 | NA       | -0.47378 | NA       |
| AT5G28590 | AT5G28590 | 0        | 0        | 0        | 0        | 0        | 0.889303 | 0        | 0        | 0        | 0        | 0        | 0        | 0        | NA       | 0.160764 | NA       | 0        | NA       |
| AT5G28593 | AT5G28593 | 0        | 0        | 0        | 0.662467 | 0        | 0        | 0        | 0        | 0        | 1.330334 | 0        | 0        | 0.101524 | NA       | 0        | NA       | 0.179327 | NA       |
| AT5G28596 | AT5G28596 | 0        | 0        | 0        | 0.412416 | 0        | 0.889303 | 0        | 0        | 0        | 0        | 0        | 0        | 0.066991 | NA       | 0.136991 | NA       | 0        | NA       |
| AT5G28600 | AT5G28600 | 0        | 0        | 0        | 0        | 0        | 0        | 0        | 0.976246 | 0        | 1.330334 | 0        | 0        | 0        | NA       | 0.150797 | NA       | 0.184203 | NA       |
| AT5G28605 | AT5G28605 | 0        | 0        | 0        | 0        | 0        | 0        | 0        | 0        | 0        | 0        | 0        | 0        | #N/A     | #N/A     | #N/A     | #N/A     | #N/A     | #N/A     |
| AT5G28610 | AT5G28610 | 0        | 0        | 0        | 0.412416 | 0.662467 | 0        | 0        | 1.952492 | 0        | 0        | 0        | 0        | 0.190843 | NA       | 0.312584 | NA       | 0        | NA       |
| AT5G28615 | AT5G28615 | 0        | 0        | 0        | 0        | 0        | 0.889303 | 0        | 0        | 0        | 0        | 0        | 0        | 0        | NA       | 0.160764 | NA       | 0        | NA       |
| AT5G28620 | AT5G28620 | 0        | 0        | 0        | 0        | 0        | 0        | 0        | 0        | 0        | 0        | 0        | 0        | #N/A     | #N/A     | #N/A     | #N/A     | #N/A     | #N/A     |
| AT5G28622 | AT5G28622 | 22.58917 | 28.54794 | 16.73951 | 27.63184 | 18.54908 | 37.87995 | 30.23632 | 26.97225 | 19.52492 | 23.02886 | 22.61568 | 23.82585 | 0.277405 | 0.520793 | 0.180686 | 0.716901 | 0.049871 | 0.961629 |
| AT5G28623 | AT5G28623 | 0        | 0        | 0        | 0        | 0        | 0        | 0        | 0        | 0        | 0        | 1.330334 | 0        | 0        | NA       | 0        | NA       | 0.172362 | NA       |
| AT5G28624 | AT5G28624 | 0        | 0        | 0        | 0.662467 | 0        | 0.889303 | 0        | 0        | 0.959536 | 0        | 1.035907 | 0        | 0.09579  | NA       | 0.155806 | NA       | 0.349001 | NA       |
| AT5G28625 | AT5G28625 | 1.188904 | 0        | 0        | 0.412416 | 0        | 0        | 0        | 0        | 0        | 0        | 0        | 0        | -0.10956 | NA       | -0.19067 | NA       | -0.18704 | NA       |
| AT5G28626 | SADHU1-3  | 28.53369 | 26.76369 | 46.35556 | 29.28151 | 30.47349 | 27.91154 | 32.90423 | 31.28781 | 15.61994 | 42.21957 | 41.24035 | 34.18492 | -0.20656 | 0.607925 | -0.33141 | 0.426037 | 0.182976 | 0.801445 |
| AT5G28627 | AT5G28627 | 0        | 0        | 0        | 0        | 0        | 1.778607 | 0        | 0        | 0        | 0        | 0        | 0        | 0        | NA       | 0.248756 | NA       | 0        | NA       |
| AT5G28630 | AT5G28630 | 1.188904 | 21.41095 | 10.30123 | 16.90904 | 15.89921 | 19.93682 | 20.45398 | 12.94668 | 67.36097 | 8.635821 | 3.991002 | 10.35907 | 0.236203 | 0.707337 | 1.022912 | 0.055857 | -0.64087 | 0.489125 |
| AT5G28635 | AT5G28635 | 0        | 1.784246 | 1.287654 | 1.237247 | 0        | 1.778607 | 0        | 0        | 0.959536 | 2.660668 | 0        | 0        | -0.23001 | NA       | -0.14396 | NA       | 0.078714 | NA       |
| AT5G28637 | AT5G28637 | 0        | 0        | 0        | 0        | 0        | 0.889303 | 0        | 0        | 0        | 0        | 0        | 0        | 0        | NA       | 0.160764 | NA       | 0        | NA       |
| AT5G28640 | GIF1      | 225.8917 | 189.1301 | 218.9012 | 320.4469 | 316.6594 | 226.2829 | 200.9826 | 186.648  | 205.0117 | 347.3519 |          |          |          |          |          |          |          |          |





|           |           |          |          |          |          |          |          |          |          |          |          |          |          |          |          |          |          |          |          |
|-----------|-----------|----------|----------|----------|----------|----------|----------|----------|----------|----------|----------|----------|----------|----------|----------|----------|----------|----------|----------|
| AT5G29975 | AT5G29975 | 1.188904 | 0        | 0        | 0        | 0.662467 | 0.996841 | 4.446517 | 1.07889  | 1.952492 | 1.919071 | 1.330334 | 1.035907 | -0.09457 | 0.905552 | 0.852029 | 0.202802 | 0.437539 | NA       |
| AT5G30060 | AT5G30060 | 0        | 0        | 0        | 0        | 0        | 0        | 0        | 0        | 0        | 0        | 0        | 0        | #N/A     | #N/A     | #N/A     | #N/A     | #N/A     | #N/A     |
| AT5G30102 | AT5G30102 | 0        | 0        | 0        | 0        | 0        | 0        | 0.889303 | 0        | 0        | 0        | 0        | 1.035907 | 0        | NA       | 0.137906 | NA       | 0.15538  | NA       |
| AT5G30123 | AT5G30123 | 0        | 0        | 0        | 0        | 0        | 0        | 0        | 0        | 0        | 0        | 0        | 0        | #N/A     | #N/A     | #N/A     | #N/A     | #N/A     | #N/A     |
| AT5G30189 | AT5G30189 | 0        | 0        | 0        | 0        | 0        | 0        | 0        | 1.07889  | 0        | 0.959536 | 0        | 0        | 0        | NA       | 0.156853 | NA       | 0.149599 | NA       |
| AT5G30207 | AT5G30207 | 0        | 0        | 0        | 0        | 0        | 0        | 0        | 1.07889  | 0        | 0        | 0        | 0        | 0        | NA       | 0.16673  | NA       | 0        | NA       |
| AT5G30218 | AT5G30218 | 0        | 0        | 0        | 0        | 0        | 0        | 0        | 0        | 0        | 0        | 0        | 0        | #N/A     | #N/A     | #N/A     | #N/A     | #N/A     | #N/A     |
| AT5G30247 | AT5G30247 | 0        | 0        | 0        | 0        | 0        | 0        | 0        | 0        | 0        | 0        | 0        | 0        | #N/A     | #N/A     | #N/A     | #N/A     | #N/A     | #N/A     |
| AT5G30269 | AT5G30269 | 2.377808 | 0        | 0        | 0        | 0        | 0        | 2.66791  | 2.15778  | 0.976246 | 2.878607 | 2.660668 | 1.035907 | -0.668   | 0.304205 | 0.451964 | 0.536646 | 0.524166 | NA       |
| AT5G30276 | AT5G30276 | 0        | 0        | 0        | 0        | 0        | 0        | 1.778607 | 0        | 1.952492 | 0        | 0        | 0        | 0        | NA       | 0.588939 | NA       | 0        | NA       |
| AT5G30341 | AT5G30341 | 0        | 0        | 0        | 0        | 0        | 0        | 0        | 0        | 0        | 0        | 0        | 0        | #N/A     | #N/A     | #N/A     | #N/A     | #N/A     | #N/A     |
| AT5G30380 | AT5G30380 | 0        | 0        | 0        | 0.412416 | 0.662467 | 0        | 0.889303 | 0        | 0        | 0        | 0        | 0        | 0.208167 | NA       | 0.156588 | NA       | 0        | NA       |
| AT5G30390 | AT5G30390 | 0        | 0        | 0        | 0        | 0        | 0        | 0        | 0        | 0        | 0        | 0        | 0        | #N/A     | #N/A     | #N/A     | #N/A     | #N/A     | #N/A     |
| AT5G30400 | AT5G30400 | 0        | 0        | 0        | 0        | 0        | 0        | 0        | 1.07889  | 0        | 0        | 1.330334 | 0        | 0        | NA       | 0.160793 | NA       | 0.184979 | NA       |
| AT5G30406 | AT5G30406 | 0        | 0        | 0        | 0.412416 | 0        | 0        | 0.889303 | 0        | 0        | 0        | 0        | 0        | 0.066991 | NA       | 0.136991 | NA       | 0        | NA       |
| AT5G30410 | AT5G30410 | 0        | 0        | 0        | 0        | 0        | 0        | 0        | 0        | 0        | 0        | 0        | 0        | #N/A     | #N/A     | #N/A     | #N/A     | #N/A     | #N/A     |
| AT5G30420 | AT5G30420 | 0        | 0        | 0        | 0.412416 | 0        | 0.996841 | 0.889303 | 2.15778  | 0        | 0        | 0        | 0        | 0.235258 | NA       | 0.510029 | NA       | 0        | NA       |
| AT5G30428 | AT5G30428 | 0        | 0        | 0        | 0        | 0        | 0        | 0        | 0        | 0        | 0        | 0        | 0        | #N/A     | #N/A     | #N/A     | #N/A     | #N/A     | #N/A     |
| AT5G30440 | AT5G30440 | 0        | 0        | 0        | 0        | 0        | 0        | 0        | 0        | 0        | 0        | 0        | 0        | #N/A     | #N/A     | #N/A     | #N/A     | #N/A     | #N/A     |
| AT5G30450 | AT5G30450 | 0        | 1.784246 | 0        | 0        | 0        | 0        | 0        | 0        | 0        | 0        | 0        | 0        | -0.2184  | NA       | -0.20558 | NA       | -0.19918 | NA       |
| AT5G30460 | AT5G30460 | 0        | 0        | 0        | 0        | 0        | 0        | 0        | 0        | 0        | 0        | 0        | 1.035907 | 0        | NA       | 0        | NA       | 0.172362 | NA       |
| AT5G30470 | AT5G30470 | 0        | 1.784246 | 0        | 0        | 0        | 0        | 0        | 1.07889  | 0        | 0        | 0        | 0        | -0.26712 | NA       | -0.06363 | NA       | -0.24374 | NA       |
| AT5G30480 | AT5G30480 | 0        | 0        | 0        | 0        | 0        | 0        | 0        | 0        | 0        | 0        | 1.330334 | 0        | 0        | NA       | 0        | NA       | 0.172362 | NA       |
| AT5G30490 | AT5G30490 | 156.9353 | 178.4246 | 173.8333 | 256.1101 | 276.2489 | 205.3492 | 201.8719 | 214.6991 | 281.1588 | 176.5546 | 220.8354 | 202.0018 | 0.531016 | 0.006476 | 0.445645 | 0.03215  | 0.227935 | 0.524933 |
| AT5G30495 | AT5G30495 | 103.4346 | 124.8972 | 136.4914 | 209.9195 | 243.788  | 210.3334 | 261.4552 | 206.068  | 254.8002 | 165.0401 | 203.5411 | 186.4632 | 0.847095 | 2.44E-06 | 0.968105 | 8.27E-08 | 0.588199 | 0.017149 |
| AT5G30500 | GOLS10    | 0        | 0        | 0        | 0        | 0.662467 | 0        | 0        | 1.07889  | 0        | 0.959536 | 0        | 0        | 0.09931  | NA       | 0.162455 | NA       | 0.157224 | NA       |
| AT5G30510 | RPS1      | 6291.68  | 6855.073 | 6782.075 | 4826.912 | 5542.201 | 5234.411 | 7320.746 | 7108.806 | 7783.609 | 8185.798 | 7767.82  | 7481.317 | -0.35082 | 0.000319 | 0.155868 | 0.161124 | 0.232646 | 0.100003 |
| AT5G30520 | AT5G30520 | 0        | 0        | 0        | 0        | 0        | 0        | 0        | 0        | 0        | 0        | 0        | 0        | #N/A     | #N/A     | #N/A     | #N/A     | #N/A     | #N/A     |
| AT5G30532 | AT5G30532 | 0        | 0        | 0        | 0        | 0.662467 | 0        | 0        | 0        | 0        | 0        | 0        | 0        | 0.128567 | NA       | 0        | NA       | 0        | NA       |
| AT5G30545 | AT5G30545 | 1.188904 | 0        | 0        | 0        | 0        | 0        | 0        | 0        | 0        | 0        | 1.330334 | 1.035907 | -0.27792 | NA       | -0.24566 | NA       | 0.172077 | NA       |
| AT5G30584 | AT5G30584 | 0        | 1.784246 | 0        | 0.412416 | 1.324935 | 0        | 5.335821 | 0        | 0        | 0        | 2.660668 | 1.035907 | -0.00927 | 0.990376 | 0.443282 | 0.499506 | 0.227482 | NA       |
| AT5G30628 | AT5G30628 | 0        | 0        | 1.287654 | 0        | 0        | 0        | 0        | 0        | 0        | 0        | 0        | 0        | -0.2184  | NA       | -0.20558 | NA       | -0.19918 | NA       |
| AT5G30648 | AT5G30648 | 0        | 0        | 0        | 0        | 0        | 0        | 0        | 0        | 0        | 0        | 0        | 0        | #N/A     | #N/A     | #N/A     | #N/A     | #N/A     | #N/A     |
| AT5G30673 | AT5G30673 | 0        | 0        | 0        | 0        | 0        | 0        | 2.66791  | 1.07889  | 0.976246 | 0        | 1.330334 | 1.035907 | 0        | NA       | 0.81205  | NA       | 0.402427 | NA       |
| AT5G30721 | AT5G30721 | 0        | 0        | 0        | 0        | 0        | 0        | 0        | 0        | 0        | 0        | 0        | 0        | #N/A     | #N/A     | #N/A     | #N/A     | #N/A     | #N/A     |
| AT5G30762 | AT5G30762 | 0        | 0        | 1.287654 | 0        | 0        | 0        | 0        | 0        | 0        | 0        | 0        | 0        | -0.2184  | NA       | -0.20558 | NA       | -0.19918 | NA       |
| AT5G30852 | AT5G30852 | 0        | 0        | 0        | 0        | 0        | 0        | 0        | 0        | 0        | 0        | 0        | 0        | #N/A     | #N/A     | #N/A     | #N/A     | #N/A     | #N/A     |
| AT5G30870 | AT5G30870 | 0        | 0        | 0        | 0        | 0.662467 | 0        | 0        | 0        | 0        | 0        | 0        | 1.035907 | 0.098893 | NA       | 0        | NA       | 0.150283 | NA       |
| AT5G30942 | AT5G30942 | 2.377808 | 0        | 0        | 0        | 0        | 0        | 0        | 2.15778  | 0        | 0        | 0        | 1.035907 | -0.39718 | NA       | -0.04297 | NA       | -0.18859 | NA       |
| AT5G31032 | AT5G31032 | 0        | 1.784246 | 0        | 0.824831 | 0        | 0        | 0        | 0        | 0        | 0        | 0        | 0        | -0.07079 | NA       | -0.23477 | NA       | -0.22995 | NA       |
| AT5G31087 | AT5G31087 | 0        | 0        | 0        | 0        | 0        | 0        | 3.557214 | 0        | 0        | 0        | 1.330334 | 0        | 0        | NA       | 0.463272 | NA       | 0.162805 | NA       |
| AT5G31092 | AT5G31092 | 0        | 0        | 0        | 0        | 0        | 0        | 0        | 0        | 0        | 0        | 0        | 0        | #N/A     | #N/A     | #N/A     | #N/A     | #N/A     | #N/A     |
| AT5G31122 | AT5G31122 | 0        | 0        | 0        | 0.412416 | 0        | 0.996841 | 1.778607 | 2.15778  | 0        | 0        | 0        | 0        | 0.223121 | NA       | 0.638338 | NA       | 0        | NA       |
| AT5G31212 | AT5G31212 | 0        | 0        | 0        | 0.412416 | 0        | 0        | 0        | 0        | 0.959536 | 0        | 0        | 0        | 0.066171 | NA       | 0        | NA       | 0.145274 | NA       |
| AT5G31302 | AT5G31302 | 0        | 0        | 0        | 0        | 0        | 0        | 0.889303 | 0        | 0        | 0        | 0        | 0        | 0        | NA       | 0.160764 | NA       | 0        | NA       |
| AT5G31314 | AT5G31314 | 0        | 0        | 0        | 0        | 0        | 0        | 0        | 0        | 0        | 0        | 0        | 0        | #N/A     | #N/A     | #N/A     | #N/A     | #N/A     | #N/A     |
| AT5G31355 | AT5G31355 | 0        | 0        | 0        | 0        | 0.662467 | 0        | 0        | 0        | 0        | 0        | 0        | 1.035907 | 0.098893 | NA       | 0        | NA       | 0.150283 | NA       |
| AT5G31412 | AT5G31412 | 0        | 0        | 0        | 0        | 0        | 0        | 0.889303 | 0        | 0        | 0        | 0        | 0        | 0        | NA       | 0.160764 | NA       | 0        | NA       |
| AT5G31496 | AT5G31496 | 0        | 0        | 0        | 0        | 0        | 0        | 0        | 0        | 0        | 0        | 0        | 0        | #N/A     | #N/A     | #N/A     | #N/A     | #N/A     | #N/A     |
| AT5G31511 | AT5G31511 | 0        | 0        | 0        | 0        | 0        | 0        | 1.778607 | 0        | 0        | 0        | 0        | 0        | 0        | NA       | 0.248756 | NA       | 0        | NA       |
| AT5G31536 | AT5G31536 | 0        | 0        | 0        | 0        | 0        | 0        | 0        | 0        | 0        | 0        | 0        | 0        | #N/A     | #N/A     | #N/A     | #N/A     | #N/A     | #N/A     |
| AT5G31572 | AT5G31572 | 0        | 0        | 0        | 0.412416 | 0        | 0        | 0.889303 | 0        | 0        | 0        | 1.330334 | 0        | 0.065278 | NA       | 0.149821 | NA       | 0.193775 | NA       |
| AT5G31637 | AT5G31637 | 0        | 0        | 0        | 0        | 0        | 0        | 0.889303 | 0        | 0        | 0        | 0        | 0        | 0        | NA       | 0.160764 | NA       | 0        | NA       |
| AT5G31651 | AT5G31651 | 0        | 0        | 0        | 0        | 0        | 0        | 0        | 0        | 0        | 0        | 0        | 0        | #N/A     | #N/A     | #N/A     | #N/A     | #N/A     | #N/A     |
| AT5G31662 | AT5G31662 | 0        | 0        | 0        | 0        | 0        | 0        | 0        | 0        | 0.959536 | 0        | 0        | 0        | 0        | NA       | 0        | NA       | 0.171512 | NA       |
| AT5G31668 | AT5G31668 | 0        | 0        | 0        | 0        | 0        | 0        | 0        | 0        | 0        | 0        | 0        | 0        | #N/A     | #N/A     | #N/A     | #N/A     | #N/A     | #N/A     |
| AT5G31685 | AT5G31685 | 0        | 0        | 0        | 0        | 0        | 0        | 0        | 0        | 0.959536 | 0        | 1.035907 | 0        | 0        | NA       | 0        | NA       | 0.332992 | NA       |
| AT5G31702 | AT5G31702 | 1.188904 | 0        | 0        | 0        | 0        | 0        | 0        | 0.976246 | 0        | 0        | 1.035907 | 0        | -0.24535 | NA       | -0.04001 | NA       | -0.02753 | NA       |
| AT5G31719 | AT5G31719 | 1.188904 | 0        | 0        | 0        | 0        | 0        | 3.557214 | 2.15778  | 0.976246 | 0        | 1.330334 | 3.10772  | -0.41273 | 0.528209 | 0.74701  | 0.246349 | 0.44927  | NA       |
| AT5G31736 | AT5G31736 | 0        | 0        | 0        | 0.662467 | 0        | 0.889303 | 0        | 0        | 0        | 0        | 1.330334 | 0        | 0.09913  | NA       | 0.145297 | NA       | 0.18929  | NA       |
| AT5G31752 | AT5G31752 | 0        | 0        | 0        | 0.662467 | 0.996841 | 0        | 0        | 0        | 0        | 0        | 0        | 0        | 0.262313 | NA       | 0        | NA       | 0        | NA       |
| AT5G31753 | AT5G31753 | 0        | 0        | 0        | 0.412416 | 0        | 0        | 0        | 0        | 0        | 0        | 1.330334 | 0        | 0.067751 | NA       | 0        | NA       | 0.180865 | NA       |
| AT5G31758 | AT5G31758 | 0        | 0        | 0        | 0        | 0        | 0        | 1.07889  | 0        | 0        | 0        | 0        | 0        | 0        | NA       | 0.16673  | NA       | 0        | NA       |
| AT5G31770 | AT5G31770 | 1.188904 | 0        | 0        | 0        | 0        | 0        | 0        | 0        | 0        | 0        | 0        | 0        | -0.2184  | NA       | -0.20558 | NA       | -0.19918 | NA       |
| AT5G31778 | AT5G31778 | 0        | 0        | 0        | 0.662467 | 0        | 0.889303 | 0        | 0        | 0.959536 | 0        | 0        | 0        | 0.100335 | NA       | 0.144523 | NA       | 0.157063 | NA       |
| AT5G31787 | AT5G31787 | 0        | 0        | 0        | 0        | 0        | 0        | 0        | 0        | 0        | 0        | 0        | 0        | #N/A     | #N/A     | #N/A     | #N/A     | #N/A     | #N/A     |
| AT5G31804 | AT5G31804 | 0        | 0        | 0.412416 | 1.324935 | 0        | 0.889303 | 1.07889  | 0        | 0        | 0        | 0        | 0        | 0.339074 | NA       | 0.343169 | NA       | 0        | NA       |
| AT5G31807 | AT5G31807 | 0        | 0        | 0        | 0        | 0        | 0.889303 | 0        | 0        | 0        | 0        | 0        | 0        | 0        | NA       | 0.160764 | NA       | 0        | NA       |
| AT5G31821 | AT5G31821 | 1.188904 | 0        | 0        | 0.412416 | 0        | 0        | 1.07889  | 0.976246 | 0        | 0        | 0        | 0        | -0.16117 | NA       | 0.136608 | NA       | -0.23989 | NA       |
| AT5G31838 | AT5G31838 | 0        | 0        | 0        | 0        | 0        | 0        | 0        | 0        | 0        | 0        | 0        | 0        | #N/A     | #N/A     | #N/A     | #N/A     | #N/A     | #N/A     |
| AT5G31842 | AT5G31842 | 0        | 0        | 0        | 0        | 0        | 0        | 0        | 0        | 0        | 0        | 0        | 0        | #N/A     | #N/A     | #N/A     | #N/A     | #N/A     | #N/A     |
| AT5G31845 | AT5G31845 | 0        | 0        | 0        | 0        | 0        | 0.889303 | 1.07889  | 0        | 0.959536 | 0        | 0        | 0        | 0        | NA       | 0.340278 | NA       | 0.175396 | NA       |
| AT5G31855 | AT5G31855 | 1.188904 | 0        | 0        | 0        | 0        | 0        | 0        | 0        | 0        | 0        | 0        | 0        | -0.2184  | NA       | -0.20558 | NA       | -0.19918 | NA       |
| AT5G31873 | AT5G31873 | 0        | 1.784246 | 0        | 0.412416 | 0.662467 | 0        | 0.889303 | 2.15778  | 0        | 0.959536 | 0        | 1.035907 | -0.10467 | NA       | 0.245    |          |          |          |



|           |           |          |          |          |          |          |          |          |          |          |          |          |          |          |          |          |          |          |          |
|-----------|-----------|----------|----------|----------|----------|----------|----------|----------|----------|----------|----------|----------|----------|----------|----------|----------|----------|----------|----------|
| AT5G32726 | AT5G32726 | 0        | 0        | 0        | 0        | 0.662467 | 0        | 0        | 0        | 0        | 0        | 0        | 0.128567 | NA       | 0        | NA       | 0        | NA       |          |
| AT5G32750 | AT5G32750 | 0        | 0        | 0        | 0        | 0        | 0        | 0        | 2.15778  | 0.976246 | 0.959536 | 1.330334 | 1.035907 | 0        | NA       | 0.547057 | NA       | 0.57556  | NA       |
| AT5G32775 | AT5G32775 | 1.188904 | 0        | 0        | 0        | 0        | 0        | 0        | 0        | 0        | 0        | 1.330334 | 0        | -0.2006  | NA       | -0.20393 | NA       | 0.001199 | NA       |
| AT5G32800 | AT5G32800 | 0        | 0        | 0        | 0        | 0        | 0        | 0        | 1.07889  | 0        | 0        | 0        | 0        | 0        | NA       | 0.16673  | NA       | 0        | NA       |
| AT5G32825 | AT5G32825 | 0        | 0        | 0        | 0        | 0.412416 | 0        | 0        | 0        | 0        | 0        | 1.330334 | 0        | 0.067751 | NA       | 0        | NA       | 0.180865 | NA       |
| AT5G32850 | AT5G32850 | 0        | 0        | 0        | 0        | 0        | 0        | 0        | 0.889303 | 0        | 0        | 0        | 1.035907 | 0        | NA       | 0.137906 | NA       | 0.15538  | NA       |
| AT5G32875 | AT5G32875 | 0        | 0        | 0        | 0        | 0        | 0        | 0        | 0.889303 | 0        | 0        | 0        | 0        | 0        | NA       | 0.160764 | NA       | 0        | NA       |
| AT5G32900 | AT5G32900 | 0        | 0        | 0        | 0        | 0        | 0        | 0        | 0.889303 | 0        | 0        | 0        | 0        | 0        | NA       | 0.160764 | NA       | 0        | NA       |
| AT5G32925 | AT5G32925 | 0        | 0        | 0        | 0        | 0        | 0        | 0        | 1.778607 | 1.07889  | 0        | 0        | 0        | 0        | NA       | 0.460477 | NA       | 0        | NA       |
| AT5G32950 | AT5G32950 | 0        | 0        | 0        | 0        | 0        | 0        | 0        | 0        | 0        | 0        | 0        | 0        | #N/A     | #N/A     | #N/A     | #N/A     | #N/A     | #N/A     |
| AT5G32975 | AT5G32975 | 0        | 0        | 0        | 0        | 0        | 0        | 0        | 0        | 0        | 0        | 0        | 0        | #N/A     | #N/A     | #N/A     | #N/A     | #N/A     | #N/A     |
| AT5G33000 | AT5G33000 | 0        | 0        | 0        | 0        | 0        | 0        | 0        | 0        | 0        | 0        | 0        | 0        | #N/A     | #N/A     | #N/A     | #N/A     | #N/A     | #N/A     |
| AT5G33025 | AT5G33025 | 0        | 0        | 0        | 0        | 0        | 0        | 0        | 0.889303 | 0        | 0        | 0        | 0        | 0        | NA       | 0.160764 | NA       | 0        | NA       |
| AT5G33050 | AT5G33050 | 1.188904 | 0        | 0        | 0        | 0        | 0        | 0.996841 | 1.778607 | 1.07889  | 1.952492 | 0        | 1.035907 | -0.161   | NA       | 0.552014 | NA       | -0.05595 | NA       |
| AT5G33070 | AT5G33070 | 0        | 0        | 0        | 0        | 0        | 0        | 0        | 0        | 0        | 0        | 0        | 0        | #N/A     | #N/A     | #N/A     | #N/A     | #N/A     | #N/A     |
| AT5G33075 | AT5G33075 | 0        | 0        | 0        | 0        | 0        | 0        | 0        | 0        | 0        | 0        | 0        | 0        | #N/A     | #N/A     | #N/A     | #N/A     | #N/A     | #N/A     |
| AT5G33100 | AT5G33100 | 0        | 0        | 0        | 0        | 0        | 0        | 0.996841 | 0        | 0        | 0        | 0        | 0        | 0        | NA       | 0.15625  | NA       | 0        | NA       |
| AT5G33125 | AT5G33125 | 1.188904 | 0        | 0        | 0        | 0        | 0        | 0.996841 | 0.889303 | 0        | 0        | 0.959536 | 0        | -0.07493 | NA       | -0.05519 | NA       | -0.03906 | NA       |
| AT5G33150 | AT5G33150 | 0        | 0        | 0        | 0        | 0        | 0        | 0        | 0        | 0        | 0        | 0        | 0        | #N/A     | #N/A     | #N/A     | #N/A     | #N/A     | #N/A     |
| AT5G33175 | AT5G33175 | 0        | 0        | 0        | 0        | 0        | 0        | 0        | 0        | 0        | 0        | 1.330334 | 0        | 0        | NA       | 0        | NA       | 0.172362 | NA       |
| AT5G33200 | AT5G33200 | 1.188904 | 0        | 0        | 0        | 0        | 0        | 0        | 0        | 0        | 0        | 0        | 0        | -0.2184  | NA       | -0.20558 | NA       | -0.19918 | NA       |
| AT5G33202 | AT5G33202 | 0        | 0        | 0        | 0        | 0        | 0        | 0.996841 | 0        | 1.07889  | 0        | 0        | 0        | 0.134295 | NA       | 0.152414 | NA       | 0        | NA       |
| AT5G33204 | AT5G33204 | 0        | 1.784246 | 0        | 0        | 0        | 0        | 1.993682 | 1.778607 | 0        | 0        | 0        | 0        | 0.034533 | NA       | 0.038734 | NA       | -0.22418 | NA       |
| AT5G33207 | AT5G33207 | 0        | 1.784246 | 0        | 0        | 0        | 0        | 0        | 0        | 0        | 0.976246 | 0        | 0        | -0.266   | NA       | -0.07274 | NA       | -0.24323 | NA       |
| AT5G33210 | SR58      | 5.94452  | 8.92123  | 9.01358  | 4.536571 | 5.962205 | 4.984204 | 2.66791  | 10.7889  | 10.73871 | 10.55489 | 10.64267 | 6.215439 | -0.47628 | 0.440839 | 0.013423 | 0.986113 | 0.166719 | NA       |
| AT5G33220 | AT5G33220 | 0        | 0        | 0        | 0        | 0        | 0        | 0        | 0        | 0        | 0        | 0        | 0        | #N/A     | #N/A     | #N/A     | #N/A     | #N/A     | #N/A     |
| AT5G33223 | AT5G33223 | 0        | 0        | 0        | 0        | 0        | 0        | 0        | 1.07889  | 0        | 0        | 0        | 0        | 0        | NA       | 0.16673  | NA       | 0        | NA       |
| AT5G33226 | AT5G33226 | 1.188904 | 1.784246 | 0        | 0        | 0        | 0        | 0        | 1.07889  | 0        | 0        | 0        | 0        | -0.51824 | NA       | -0.26789 | NA       | -0.47293 | NA       |
| AT5G33230 | AT5G33230 | 0        | 0        | 0        | 0        | 0        | 0        | 0        | 0        | 0        | 0        | 0        | 0        | #N/A     | #N/A     | #N/A     | #N/A     | #N/A     | #N/A     |
| AT5G33232 | AT5G33232 | 0        | 0        | 0        | 0        | 0        | 0        | 0        | 0        | 0        | 0        | 0        | 0        | #N/A     | #N/A     | #N/A     | #N/A     | #N/A     | #N/A     |
| AT5G33234 | AT5G33234 | 0        | 0        | 0        | 0        | 0        | 0.996841 | 0        | 2.15778  | 0.976246 | 0        | 1.330334 | 0        | 0.111042 | NA       | 0.478504 | NA       | 0.189626 | NA       |
| AT5G33237 | AT5G33237 | 0        | 0        | 0        | 0        | 0        | 0        | 0        | 0        | 0        | 0        | 0        | 0        | #N/A     | #N/A     | #N/A     | #N/A     | #N/A     | #N/A     |
| AT5G33240 | AT5G33240 | 0        | 0        | 0        | 0        | 0        | 0        | 0        | 0        | 0        | 0        | 0        | 0        | #N/A     | #N/A     | #N/A     | #N/A     | #N/A     | #N/A     |
| AT5G33250 | AT5G33250 | 0        | 0        | 0        | 0        | 0        | 0        | 0        | 0        | 0        | 0        | 0        | 0        | #N/A     | #N/A     | #N/A     | #N/A     | #N/A     | #N/A     |
| AT5G33251 | AT5G33251 | 0        | 0        | 0        | 0        | 0.662467 | 0        | 0        | 0        | 0.976246 | 0        | 0        | 0        | 0.097788 | NA       | 0.140077 | NA       | 0        | NA       |
| AT5G33252 | AT5G33252 | 0        | 0        | 1.287654 | 0        | 0        | 0        | 0.889303 | 0        | 0        | 0        | 0        | 0        | -0.21946 | NA       | -0.0473  | NA       | -0.20113 | NA       |
| AT5G33253 | AT5G33253 | 0        | 0        | 0        | 0.412416 | 0        | 0        | 0        | 0        | 0        | 0        | 0        | 1.035907 | 0.065109 | NA       | 0        | NA       | 0.150531 | NA       |
| AT5G33254 | AT5G33254 | 0        | 0        | 0        | 0        | 0        | 0        | 0.889303 | 0        | 0        | 0        | 0        | 0        | 0        | NA       | 0.160764 | NA       | 0        | NA       |
| AT5G33255 | AT5G33255 | 0        | 0        | 0        | 0.412416 | 0        | 0        | 0.889303 | 0        | 0        | 0        | 0        | 0        | 0.066991 | NA       | 0.136991 | NA       | 0        | NA       |
| AT5G33256 | AT5G33256 | 1.188904 | 0        | 0        | 0        | 0.662467 | 0        | 0.889303 | 0        | 0        | 0        | 0        | 0        | -0.09199 | NA       | -0.04588 | NA       | -0.20606 | NA       |
| AT5G33257 | AT5G33257 | 0        | 0        | 0        | 0        | 0        | 0        | 0        | 0        | 0        | 0        | 0        | 0        | #N/A     | #N/A     | #N/A     | #N/A     | #N/A     | #N/A     |
| AT5G33258 | AT5G33258 | 0        | 0        | 0        | 0        | 0        | 0.889303 | 0        | 0        | 0        | 0        | 0        | 0        | 0        | NA       | 0.160764 | NA       | 0        | NA       |
| AT5G33259 | AT5G33259 | 0        | 0        | 0        | 0        | 0        | 0        | 0        | 0        | 0        | 0        | 0        | 0        | #N/A     | #N/A     | #N/A     | #N/A     | #N/A     | #N/A     |
| AT5G33260 | AT5G33260 | 0        | 0        | 0        | 0        | 0        | 0        | 0        | 0        | 0        | 0        | 0        | 0        | #N/A     | #N/A     | #N/A     | #N/A     | #N/A     | #N/A     |
| AT5G33270 | AT5G33270 | 0        | 0        | 0        | 0        | 0        | 0        | 0        | 0        | 0        | 0        | 1.330334 | 0        | 0        | NA       | 0        | NA       | 0.172362 | NA       |
| AT5G33280 | CBCLC6    | 431.5721 | 346.1437 | 350.242  | 221.4672 | 225.9013 | 284.0996 | 297.9167 | 293.4581 | 231.3703 | 356.9473 | 361.8508 | 339.7773 | -0.62601 | 0.000156 | -0.45025 | 0.010944 | -0.09406 | 0.795551 |
| AT5G33285 | AT5G33285 | 0        | 0        | 0        | 0        | 0        | 0        | 0        | 0        | 0        | 0        | 0        | 0        | #N/A     | #N/A     | #N/A     | #N/A     | #N/A     | #N/A     |
| AT5G33290 | XGD1      | 124.8349 | 153.4452 | 144.2173 | 329.52   | 331.2336 | 315.0017 | 358.3893 | 301.0103 | 309.47   | 77.72239 | 103.766  | 105.6625 | 1.195573 | 6.63E-14 | 1.184981 | 2.48E-13 | -0.54228 | 0.031496 |
| AT5G33300 | AT5G33300 | 46.36725 | 39.25341 | 65.67037 | 56.08852 | 58.95959 | 63.79781 | 62.25124 | 38.84004 | 44.90732 | 65.24842 | 70.5077  | 75.62118 | 0.205669 | 0.513067 | -0.05622 | 0.88676  | 0.442807 | 0.311768 |
| AT5G33303 | AT5G33303 | 0        | 0        | 0        | 1.649662 | 1.324935 | 0        | 1.778607 | 0        | 0        | 0        | 0        | 0        | 0.48355  | NA       | 0.273306 | NA       | 0        | NA       |
| AT5G33306 | AT5G33306 | 0        | 1.784246 | 0        | 0        | 0        | 0        | 0        | 0        | 0        | 0        | 0        | 0        | -0.2184  | NA       | -0.20558 | NA       | -0.19918 | NA       |
| AT5G33310 | AT5G33310 | 1.188904 | 0        | 0        | 0        | 0        | 0        | 0.889303 | 0        | 0        | 0        | 0        | 0        | -0.20902 | NA       | -0.03919 | NA       | -0.19148 | NA       |
| AT5G33315 | AT5G33315 | 0        | 0        | 0        | 1.649662 | 1.324935 | 2.990522 | 3.557214 | 2.15778  | 5.857476 | 0.959536 | 0        | 1.035907 | 0.852351 | 0.195431 | 1.447596 | 0.02233  | 0.305614 | NA       |
| AT5G33320 | PPT1      | 1178.204 | 788.6367 | 937.4124 | 623.5723 | 726.7266 | 658.9118 | 732.7861 | 666.754  | 575.0089 | 854.9462 | 1052.294 | 809.043  | -0.52379 | 0.00332  | -0.54746 | 0.002583 | -0.09877 | 0.795657 |
| AT5G33330 | AT5G33330 | 0        | 0        | 0        | 0        | 0        | 0.996841 | 0        | 1.07889  | 0        | 0        | 1.330334 | 0        | 0.131103 | NA       | 0.159742 | NA       | 0.186122 | NA       |
| AT5G33340 | CDR1      | 0        | 0        | 0        | 0        | 0        | 0.996841 | 0.889303 | 0        | 0.976246 | 0.959536 | 0        | 0        | 0.129805 | NA       | 0.322409 | NA       | 0.169171 | NA       |
| AT5G33350 | AT5G33350 | 0        | 0        | 0        | 0        | 0        | 0        | 0        | 0        | 0        | 0        | 0        | 0        | #N/A     | #N/A     | #N/A     | #N/A     | #N/A     | #N/A     |
| AT5G33355 | AT5G33355 | 0        | 1.784246 | 0        | 2.062078 | 2.649869 | 2.990522 | 6.225124 | 4.31556  | 14.64369 | 0.959536 | 1.330334 | 1.035907 | 0.720746 | 0.296058 | 1.94453  | 0.00168  | 0.20024  | NA       |
| AT5G33360 | AT5G33360 | 0        | 0        | 0        | 0        | 0        | 0        | 0        | 0        | 0        | 0        | 0        | 0        | #N/A     | #N/A     | #N/A     | #N/A     | #N/A     | #N/A     |
| AT5G33365 | AT5G33365 | 0        | 0        | 0        | 0        | 0        | 0        | 0        | 0        | 0        | 0        | 0        | 0        | #N/A     | #N/A     | #N/A     | #N/A     | #N/A     | #N/A     |
| AT5G33370 | AT5G33370 | 130.7794 | 224.815  | 162.2444 | 170.74   | 164.9544 | 91.70935 | 88.04104 | 70.12785 | 89.81463 | 196.7048 | 252.7635 | 170.9246 | -0.24111 | 0.44078  | -0.99335 | 0.000313 | 0.255465 | 0.612957 |
| AT5G33380 | AT5G33380 | 1.188904 | 1.784246 | 0        | 0        | 0        | 0        | 0.889303 | 0        | 0        | 0        | 0        | 0        | -0.51815 | NA       | -0.28593 | NA       | -0.47378 | NA       |
| AT5G33381 | AT5G33381 | 0        | 0        | 0        | 0        | 0        | 0        | 0        | 0        | 0        | 0        | 0        | 0        | 0        | NA       | 0        | NA       | 0.172362 | NA       |
| AT5G33382 | AT5G33382 | 9.511232 | 12.48972 | 5.150617 | 7.835896 | 7.949607 | 2.990522 | 8.003731 | 5.39445  | 2.928738 | 8.635821 | 10.64267 | 11.39497 | -0.33528 | 0.591008 | -0.51785 | 0.423156 | 0.169748 | NA       |
| AT5G33383 | AT5G33383 | 2.377808 | 0        | 0        | 0        | 1.324935 | 0.996841 | 0.889303 | 0        | 0        | 0        | 0        | 0        | -0.03126 | NA       | -0.24241 | NA       | -0.21446 | NA       |
| AT5G33384 | AT5G33384 | 0        | 0        | 0        | 0        | 0        | 0        | 0        | 0        | 0        | 0        | 1.330334 | 0        | 0        | NA       | 0        | NA       | 0.172362 | NA       |
| AT5G33385 | AT5G33385 | 0        | 0        | 0        | 0        | 0.662467 | 0        | 1.778607 | 0        | 0        | 0        | 0        | 0        | 0.091702 | NA       | 0.255494 | NA       | 0        | NA       |
| AT5G33386 | AT5G33386 | 0        | 0        | 0        | 0        | 0        | 0        | 0        | 1.07889  | 0        | 0        | 0        | 0        | 0        | NA       | 0.16673  | NA       | 0        | NA       |
| AT5G33387 | AT5G33387 | 0        | 0        | 0        | 0        | 0        | 0        | 0.889303 | 0        | 0        | 0        | 0        | 0        | 0        | NA       | 0.160764 | NA       | 0        | NA       |
| AT5G33388 | AT5G33388 | 0        | 1.784246 | 0        | 0        | 0        | 0        | 0.889303 | 0        | 0        | 0        | 0        | 0        | -0.26522 | NA       | -0.08117 | NA       | -0.24296 | NA       |
| AT5G33389 | AT5G33389 | 0        | 0        | 1.287654 | 0        | 0.662467 | 0        | 0        | 3.23667  | 0        | 0        | 1.330334 | 0        | -0.12802 | NA       | 0.238698 | NA       | -0.01989 | NA       |
| AT5G33390 | AT5G33390 | 0        | 0        | 0        | 0        | 0        | 0        | 0        | 1.07889  | 0        | 0        | 0        | 0        | 0        | NA       | 0.16673  | NA       | 0        | NA       |
| AT5G33391 | AT5G33391 | 0        |          |          |          |          |          |          |          |          |          |          |          |          |          |          |          |          |          |

|           |           |          |          |          |          |          |          |          |          |          |          |          |          |          |          |          |          |           |          |
|-----------|-----------|----------|----------|----------|----------|----------|----------|----------|----------|----------|----------|----------|----------|----------|----------|----------|----------|-----------|----------|
| AT5G33990 | AT5G33990 | 0        | 0        | 0        | 0        | 0        | 0        | 0.889303 | 0        | 0.976246 | 0        | 0        | 0        | NA       | 0.309898 | NA       | 0        | NA        |          |
| AT5G34082 | AT5G34082 | 0        | 0        | 0        | 0        | 0.662467 | 0        | 0        | 0        | 0        | 0        | 1.035907 | 0.098893 | NA       | 0        | NA       | 0.150283 | NA        |          |
| AT5G34174 | AT5G34174 | 0        | 0        | 0        | 0        | 0.662467 | 0        | 1.07889  | 0        | 0        | 0        | 0        | 0.098648 | NA       | 0.150881 | NA       | 0        | NA        |          |
| AT5G34266 | AT5G34266 | 0        | 0        | 0        | 0        | 0        | 0        | 0        | 0        | 0        | 0        | 1.035907 | 0        | NA       | 0        | NA       | 0.172362 | NA        |          |
| AT5G34358 | AT5G34358 | 0        | 0        | 0        | 0        | 0        | 0        | 0        | 0        | 0        | 0        | 0        | #N/A     | #N/A     | #N/A     | #N/A     | #N/A     | #N/A      |          |
| AT5G34376 | AT5G34376 | 0        | 0        | 0        | 0        | 0        | 0        | 0        | 0        | 0        | 0        | 0        | #N/A     | #N/A     | #N/A     | #N/A     | #N/A     | #N/A      |          |
| AT5G34394 | AT5G34394 | 0        | 0        | 0        | 0        | 0        | 0        | 0        | 0        | 0        | 0        | 0        | #N/A     | #N/A     | #N/A     | #N/A     | #N/A     | #N/A      |          |
| AT5G34412 | AT5G34412 | 0        | 0        | 0        | 0        | 0        | 0        | 0        | 0        | 0        | 0        | 0        | #N/A     | #N/A     | #N/A     | #N/A     | #N/A     | #N/A      |          |
| AT5G34431 | AT5G34431 | 0        | 0        | 0        | 0        | 0        | 0.996841 | 0        | 0        | 0        | 0        | 1.035907 | 0.134822 | NA       | 0        | NA       | 0.152581 | NA        |          |
| AT5G34450 | AT5G34450 | 0        | 0        | 0        | 0        | 0        | 0        | 0        | 0        | 0        | 0        | 0        | #N/A     | #N/A     | #N/A     | #N/A     | #N/A     | #N/A      |          |
| AT5G34460 | AT5G34460 | 0        | 0        | 0        | 0        | 0        | 0        | 0        | 0        | 0        | 0        | 0        | #N/A     | #N/A     | #N/A     | #N/A     | #N/A     | #N/A      |          |
| AT5G34480 | AT5G34480 | 0        | 0        | 0        | 0        | 0        | 0.996841 | 0        | 0        | 0        | 0        | 0        | 0.15625  | NA       | 0        | NA       | 0        | NA        |          |
| AT5G34500 | AT5G34500 | 0        | 0        | 0        | 0        | 0        | 0        | 0        | 0        | 0        | 0        | 0        | #N/A     | #N/A     | #N/A     | #N/A     | #N/A     | #N/A      |          |
| AT5G34520 | AT5G34520 | 0        | 0        | 0        | 0        | 0        | 0        | 0        | 0        | 0        | 0        | 0        | #N/A     | #N/A     | #N/A     | #N/A     | #N/A     | #N/A      |          |
| AT5G34540 | AT5G34540 | 0        | 0        | 0        | 0        | 0        | 0        | 0        | 0        | 0        | 0        | 0        | #N/A     | #N/A     | #N/A     | #N/A     | #N/A     | #N/A      |          |
| AT5G34560 | AT5G34560 | 0        | 1.784246 | 0        | 0        | 0        | 0        | 0        | 0        | 0        | 0        | 1.330334 | 1.035907 | -0.3233  | NA       | -0.28783 | NA       | 0.137032  | NA       |
| AT5G34581 | AT5G34581 | 0        | 0        | 0        | 0        | 0        | 0        | 0        | 0        | 0        | 0        | 0        | #N/A     | #N/A     | #N/A     | #N/A     | #N/A     | #N/A      |          |
| AT5G34602 | AT5G34602 | 0        | 0        | 0        | 0        | 0.662467 | 0        | 0        | 0        | 0        | 0        | 1.035907 | 0.098893 | NA       | 0        | NA       | 0.150283 | NA        |          |
| AT5G34623 | AT5G34623 | 1.188904 | 0        | 1.287654 | 0        | 0        | 0.996841 | 1.778607 | 0        | 0        | 1.330334 | 0        | -0.29456 | NA       | -0.09785 | NA       | -0.20495 | NA        |          |
| AT5G34644 | AT5G34644 | 0        | 0        | 0        | 0        | 0        | 0        | 0.889303 | 0        | 0        | 0        | 0        | 0        | NA       | 0.160764 | NA       | 0        | NA        |          |
| AT5G34665 | AT5G34665 | 0        | 0        | 0        | 0        | 0        | 0        | 0        | 0        | 0        | 0        | 1.035907 | 0        | NA       | 0        | NA       | 0.172362 | NA        |          |
| AT5G34686 | AT5G34686 | 0        | 0        | 0        | 0        | 0        | 0        | 0        | 0        | 0        | 0        | 0        | #N/A     | #N/A     | #N/A     | #N/A     | #N/A     | #N/A      |          |
| AT5G34696 | AT5G34696 | 0        | 0        | 0        | 0        | 0        | 0        | 0.889303 | 0        | 0.959536 | 0        | 0        | 0        | NA       | 0.13694  | NA       | 0.147196 | NA        |          |
| AT5G34707 | AT5G34707 | 0        | 0        | 0        | 0        | 0        | 0        | 0        | 0        | 0        | 0        | 0        | #N/A     | #N/A     | #N/A     | #N/A     | #N/A     | #N/A      |          |
| AT5G34728 | AT5G34728 | 0        | 0        | 0        | 0        | 0        | 0        | 0        | 0        | 0        | 1.330334 | 0        | 0        | NA       | 0        | NA       | 0.172362 | NA        |          |
| AT5G34749 | AT5G34749 | 0        | 0        | 0        | 0        | 0        | 0        | 0        | 0        | 0        | 0        | 0        | #N/A     | #N/A     | #N/A     | #N/A     | #N/A     | #N/A      |          |
| AT5G34770 | AT5G34770 | 0        | 0        | 0        | 0        | 0        | 1.778607 | 0        | 0        | 0        | 1.330334 | 0        | 0        | NA       | 0.264566 | NA       | 0.174671 | NA        |          |
| AT5G34780 | KPR       | 11.88904 | 17.84246 | 9.01358  | 14.43455 | 15.23675 | 19.93682 | 13.33955 | 20.49891 | 16.59618 | 15.35257 | 6.65167  | 8.287252 | 0.320564 | 0.531585 | 0.352363 | 0.518907 | -0.23586  | NA       |
| AT5G34790 | AT5G34790 | 32.10041 | 26.76369 | 19.31482 | 5.773818 | 5.299738 | 9.968408 | 6.225124 | 2.15778  | 4.88123  | 19.19071 | 9.312338 | 18.64632 | -1.67712 | 0.000114 | -0.25603 | 1.07E-05 | -0.61956  | NA       |
| AT5G34795 | AT5G34795 | 11.88904 | 16.05821 | 12.87654 | 2.474493 | 1.987402 | 0.996841 | 5.335821 | 4.31556  | 3.904984 | 5.757214 | 1.330334 | 8.287252 | -2.02369 | 0.000168 | -1.21958 | 0.034498 | -1.05516  | NA       |
| AT5G34800 | AT5G34800 | 32.10041 | 17.84246 | 27.04074 | 9.073143 | 5.299738 | 5.981045 | 5.335821 | 10.7889  | 5.857476 | 20.15025 | 22.61568 | 21.75404 | -1.64186 | 0.000063 | -1.58539 | 0.000296 | -0.25112  | NA       |
| AT5G34810 | AT5G34810 | 3.566712 | 1.784246 | 5.150617 | 0.824831 | 0.662467 | 0.996841 | 0        | 3.23667  | 0        | 2.878607 | 2.660668 | 3.10772  | -1.02019 | 0.12583  | -0.85655 | 0.228185 | -0.16413  | NA       |
| AT5G34820 | AT5G34820 | 0        | 0        | 0        | 0        | 0        | 0        | 0        | 0        | 0        | 0        | 0        | 0        | #N/A     | #N/A     | #N/A     | #N/A     | #N/A      | #N/A     |
| AT5G34825 | AT5G34825 | 4.755616 | 3.568492 | 3.862963 | 0.824831 | 0        | 0.996841 | 0        | 3.23667  | 2.928738 | 3.838143 | 3.991002 | 4.143626 | -1.31948 | 0.040513 | -0.58718 | 0.435283 | -0.00097  | NA       |
| AT5G34828 | AT5G34828 | 0        | 0        | 0        | 0        | 0        | 0        | 0        | 0        | 0        | 0        | 0        | 0        | #N/A     | #N/A     | #N/A     | #N/A     | #N/A      | #N/A     |
| AT5G34829 | AT5G34829 | 0        | 0        | 0        | 0        | 0        | 0        | 0        | 0        | 0        | 0        | 0        | 0        | #N/A     | #N/A     | #N/A     | #N/A     | #N/A      | #N/A     |
| AT5G34830 | AT5G34830 | 2.377808 | 0        | 3.862963 | 0.412416 | 0        | 0        | 1.778607 | 0        | 0.976246 | 3.838143 | 2.660668 | 2.071813 | -1.04023 | 0.107003 | -0.48537 | 0.516926 | 0.234727  | NA       |
| AT5G34831 | AT5G34831 | 0        | 0        | 0        | 0        | 0        | 0        | 0        | 0        | 0        | 0        | 0        | 0        | #N/A     | #N/A     | #N/A     | #N/A     | #N/A      | #N/A     |
| AT5G34832 | AT5G34832 | 0        | 0        | 0        | 0        | 0        | 0        | 0        | 1.07889  | 0        | 0        | 0        | 0        | 0        | NA       | 0.16673  | NA       | 0         | NA       |
| AT5G34833 | AT5G34833 | 0        | 0        | 0        | 0        | 0.662467 | 0        | 3.557214 | 1.07889  | 0        | 0        | 1.035907 | 0.06069  | NA       | 0.677575 | NA       | 0.159459 | NA        | NA       |
| AT5G34834 | AT5G34834 | 0        | 1.784246 | 0        | 0.412416 | 0        | 0        | 0.889303 | 0        | 0        | 0        | 0        | 0        | -0.17556 | NA       | -0.08634 | NA       | -0.258627 | NA       |
| AT5G34835 | AT5G34835 | 1.188904 | 0        | 0        | 0        | 0        | 0        | 0        | 0        | 0        | 0        | 0        | 1.035907 | -0.21339 | NA       | -0.19896 | NA       | -0.02174  | NA       |
| AT5G34836 | AT5G34836 | 0        | 0        | 0        | 0        | 0        | 0        | 0        | 0        | 0.959536 | 0        | 0        | 0        | 0        | NA       | 0        | NA       | 0.171512  | NA       |
| AT5G34837 | AT5G34837 | 0        | 0        | 0        | 0        | 0        | 0        | 0        | 0        | 0        | 1.330334 | 0        | 0        | 0        | NA       | 0        | NA       | 0.172362  | NA       |
| AT5G34838 | AT5G34838 | 0        | 0        | 0        | 0        | 0        | 0        | 0        | 0        | 0        | 0        | 0        | 0        | #N/A     | #N/A     | #N/A     | #N/A     | #N/A      | #N/A     |
| AT5G34839 | AT5G34839 | 0        | 0        | 0        | 0        | 0        | 0        | 0        | 0        | 0        | 0        | 0        | 0        | #N/A     | #N/A     | #N/A     | #N/A     | #N/A      | #N/A     |
| AT5G34840 | AT5G34840 | 0        | 0        | 0        | 0        | 0        | 0        | 1.07889  | 0        | 0        | 0        | 0        | 0        | 0        | NA       | 0.16673  | NA       | 0         | NA       |
| AT5G34841 | AT5G34841 | 0        | 0        | 0        | 0        | 0        | 0        | 0        | 0        | 0        | 0        | 0        | 0        | #N/A     | #N/A     | #N/A     | #N/A     | #N/A      | #N/A     |
| AT5G34842 | AT5G34842 | 1.188904 | 0        | 0        | 0        | 0        | 0        | 0.889303 | 0        | 0        | 0        | 0        | 0        | -0.20902 | NA       | -0.03919 | NA       | -0.19148  | NA       |
| AT5G34843 | AT5G34843 | 0        | 0        | 0        | 0        | 0        | 0        | 0        | 0        | 0        | 0        | 0        | 0        | #N/A     | #N/A     | #N/A     | #N/A     | #N/A      | #N/A     |
| AT5G34844 | AT5G34844 | 0        | 0        | 0        | 0        | 0        | 0        | 0        | 0        | 0        | 0        | 0        | 1.035907 | 0        | NA       | 0        | NA       | 0.172362  | NA       |
| AT5G34845 | AT5G34845 | 0        | 0        | 0        | 0        | 0        | 0.889303 | 0        | 0        | 0        | 0        | 0        | 0        | 0        | NA       | 0.160764 | NA       | 0         | NA       |
| AT5G34846 | AT5G34846 | 0        | 0        | 0        | 0        | 0        | 0.889303 | 0        | 0        | 0        | 0        | 1.035907 | 0        | NA       | 0.137906 | NA       | 0.15538  | NA        | NA       |
| AT5G34847 | AT5G34847 | 1.188904 | 0        | 0        | 0        | 0.662467 | 0        | 0        | 0        | 0        | 0        | 0        | 0        | -0.07436 | NA       | -0.18968 | NA       | -0.18606  | NA       |
| AT5G34848 | AT5G34848 | 0        | 0        | 0        | 0        | 0        | 0        | 0        | 0        | 0        | 0        | 0        | 1.035907 | 0        | NA       | 0        | NA       | 0.172362  | NA       |
| AT5G34849 | AT5G34849 | 0        | 0        | 0        | 0        | 0        | 0        | 0        | 0        | 0        | 0        | 0        | 0        | #N/A     | #N/A     | #N/A     | #N/A     | #N/A      | #N/A     |
| AT5G34850 | PAP26     | 1391.018 | 1416.691 | 1474.364 | 1161.775 | 912.2174 | 1197.206 | 1089.397 | 1216.988 | 1092.419 | 1276.182 | 949.8585 | 1660.558 | -0.37944 | 0.057697 | -0.32542 | 0.125338 | -0.13514  | 0.7288   |
| AT5G34851 | AT5G34851 | 1.188904 | 0        | 0        | 0.412416 | 0.662467 | 0.996841 | 0.889303 | 2.15778  | 1.952492 | 1.919071 | 0        | 0        | 0.069049 | 0.929344 | 0.552191 | 0.411156 | -0.11082  | NA       |
| AT5G34852 | AT5G34852 | 0        | 0        | 0        | 0        | 0        | 0        | 0        | 0        | 0        | 0        | 0        | 0        | #N/A     | #N/A     | #N/A     | #N/A     | #N/A      | #N/A     |
| AT5G34853 | AT5G34853 | 275.8257 | 265.8527 | 235.6407 | 194.2477 | 180.8536 | 235.2544 | 216.1007 | 206.068  | 191.3442 | 198.6239 | 260.7455 | 220.6481 | -0.35029 | 0.047933 | -0.3335  | 0.077155 | -0.19472  | 0.537364 |
| AT5G34854 | AT5G34854 | 0        | 0        | 0        | 0        | 0        | 0        | 1.778607 | 1.07889  | 0        | 0        | 0        | 0        | 0        | NA       | 0.460477 | NA       | 0         | NA       |
| AT5G34855 | AT5G34855 | 0        | 0        | 0        | 0        | 0        | 0        | 0        | 0        | 0        | 0        | 0        | 0        | #N/A     | #N/A     | #N/A     | #N/A     | #N/A      | #N/A     |
| AT5G34856 | AT5G34856 | 0        | 0        | 0        | 0        | 0        | 0.996841 | 0.889303 | 2.15778  | 0        | 0.959536 | 0        | 1.035907 | 0.098591 | NA       | 0.495241 | NA       | 0.34714   | NA       |
| AT5G34857 | AT5G34857 | 1.188904 | 0        | 0        | 0        | 0        | 0.889303 | 0        | 0.976246 | 0        | 0        | 0        | 0        | -0.26727 | NA       | 0.121982 | NA       | -0.23048  | NA       |
| AT5G34858 | AT5G34858 | 1.188904 | 0        | 0        | 0        | 0        | 0        | 0        | 2.15778  | 0.976246 | 0        | 0        | 0        | -0.27954 | NA       | 0.290901 | NA       | -0.23241  | NA       |
| AT5G34859 | AT5G34859 | 0        | 0        | 0        | 0        | 0        | 0        | 0        | 0        | 0        | 0        | 0        | 0        | #N/A     | #N/A     | #N/A     | #N/A     | #N/A      | #N/A     |
| AT5G34860 | AT5G34860 | 0        | 0        | 0.412416 | 0        | 0        | 0        | 0        | 0        | 0        | 0        | 0        | 0        | 0.095918 | NA       | 0        | NA       | 0         | NA       |
| AT5G34861 | AT5G34861 | 0        | 0        | 0        | 0        | 0        | 0        | 0        | 0        | 0        | 0        | 0        | 0        | #N/A     | #N/A     | #N/A     | #N/A     | #N/A      | #N/A     |
| AT5G34862 | AT5G34862 | 0        | 0        | 0        | 0        | 0        | 0.889303 | 1.07889  | 0        | 0        | 0        | 0        | 0        | 0        | NA       | 0.3225   | NA       | 0         | NA       |
| AT5G34863 | AT5G34863 | 0        | 0        | 0        | 0.662467 | 0        | 1.778607 | 0        | 0        | 0        | 0        | 0        | 0        | 0.091702 | NA       | 0.255494 | NA       | 0         | NA       |
| AT5G34864 | AT5G34864 | 0        | 0        | 0        | 0        | 0        | 1.778607 | 0        | 0        | 0        | 2.660668 | 0        | 0        | 0        | NA       | 0.249862 | NA       | 0.323471  | NA       |
| AT5G34865 | AT5G34865 | 0        | 0        | 0        | 0        | 0        | 0        | 0        | 0        | 0        | 0        | 0        | 0        | #N/A     | #N/A     | #N/A     | #N/A     | #N/A      | #N/A     |
| AT5G34866 | AT5G34866 | 0        | 0        | 0        | 0        | 0        | 0        | 0        | 0        | 0        | 0        | 0        | 0        | #N/A     | #N/A     | #N/A     | #N/A     | #N/A      | #N/A     |
| AT5G34867 | AT5G34867 | 0        | 0        | 0        | 0        | 0        | 0.889303 | 0        | 0        | 0        | 0        | 0        | 0        | 0        | NA       | 0.160764 | NA       | 0         | NA       |
| AT5G34868 | AT5G34868 | 2.377808 | 3.568492 | 0        | 0.824831 |          |          |          |          |          |          |          |          |          |          |          |          |           |          |



|           |            |          |          |          |          |          |          |          |          |          |          |          |          |          |          |          |          |          |          |
|-----------|------------|----------|----------|----------|----------|----------|----------|----------|----------|----------|----------|----------|----------|----------|----------|----------|----------|----------|----------|
| ATSG35590 | PAA1       | 788.2433 | 981.3353 | 996.6445 | 1524.288 | 1690.616 | 1455.388 | 1247.693 | 1261.222 | 1354.053 | 1065.085 | 1358.271 | 927.1363 | 0.744236 | 2.06E-06 | 0.474641 | 0.004527 | 0.271059 | 0.305041 |
| ATSG35600 | HD7        | 0        | 1.784246 | 0        | 0        | 1.324935 | 0        | 0        | 0        | 0        | 0.959536 | 1.330334 | 0        | -0.02733 | NA       | -0.27669 | NA       | 0.109814 | NA       |
| ATSG35601 | ATSG35601  | 0        | 0        | 0        | 0        | 0        | 0        | 0        | 0        | 0        | 0        | 0        | 0        | #N/A     | #N/A     | #N/A     | #N/A     | #N/A     | #N/A     |
| ATSG35602 | ATSG35602  | 0        | 0        | 0        | 0        | 0        | 0.996841 | 0        | 0        | 0        | 0        | 0        | 0        | 0.15625  | NA       | 0        | NA       | 0        | NA       |
| ATSG35603 | ATSG35603  | 0        | 0        | 0        | 0        | 0        | 0        | 0        | 1.07889  | 0        | 0        | 1.330334 | 0        | 0        | NA       | 0.160793 | NA       | 0.184979 | NA       |
| ATSG35604 | ATSG35604  | 0        | 0        | 0        | 0        | 0        | 0        | 0        | 0        | 0        | 0        | 0        | 0        | #N/A     | #N/A     | #N/A     | #N/A     | #N/A     | #N/A     |
| ATSG35605 | ATSG35605  | 0        | 0        | 0        | 0        | 0        | 0        | 0        | 0        | 0        | 0        | 0        | 0        | #N/A     | #N/A     | #N/A     | #N/A     | #N/A     | #N/A     |
| ATSG35606 | ATSG35606  | 1.188904 | 0        | 1.287654 | 0.412416 | 0.662467 | 0        | 1.778607 | 0        | 2.928738 | 0        | 1.330334 | 1.035907 | -0.31385 | 0.650755 | 0.139062 | 0.662313 | -0.06426 | NA       |
| ATSG35607 | ATSG35607  | 0        | 0        | 0        | 0        | 0        | 0        | 0        | 0        | 0        | 0        | 0        | 0        | #N/A     | #N/A     | #N/A     | #N/A     | #N/A     | #N/A     |
| ATSG35608 | ATSG35608  | 0        | 0        | 0        | 2.062078 | 1.987402 | 2.990522 | 0        | 2.15778  | 0        | 0        | 0        | 0        | 1.046007 | NA       | 0.330514 | NA       | 0        | NA       |
| ATSG35610 | ATSG35610  | 1.188904 | 0        | 0        | 0        | 0        | 0        | 0        | 0        | 0        | 0        | 0        | 1.035907 | -0.21339 | NA       | -0.19896 | NA       | -0.02174 | NA       |
| ATSG35615 | ATSG35615  | 0        | 0        | 0        | 0        | 0        | 0        | 0        | 0        | 0        | 0        | 0        | 0        | #N/A     | #N/A     | #N/A     | #N/A     | #N/A     | #N/A     |
| ATSG35620 | EIf[ISO]4E | 360.2379 | 392.5341 | 458.4049 | 524.1802 | 557.135  | 446.5847 | 420.6405 | 413.2148 | 579.8901 | 392.4501 | 400.4305 | 335.6337 | 0.330462 | 0.081157 | 0.21832  | 0.301176 | -0.10092 | 0.796296 |
| ATSG35630 | GLN2       | 12056.67 | 12675.28 | 11937.84 | 6556.17  | 5776.715 | 5851.455 | 7947.705 | 8534.019 | 9183.546 | 12586.23 | 12066.13 | 11900.49 | -1.00474 | 9.93E-28 | -0.51135 | 9.49E-08 | -0.0044  | 0.988256 |
| ATSG35631 | ATSG35631  | 0        | 0        | 0        | 0        | 0        | 0        | 0        | 0        | 0        | 0        | 0        | 0        | #N/A     | #N/A     | #N/A     | #N/A     | #N/A     | #N/A     |
| ATSG35640 | ATSG35640  | 0        | 0        | 0        | 0        | 0        | 0        | 0        | 0        | 0        | 0.959536 | 0        | 0        | 0        | NA       | 0        | NA       | 0.171512 | NA       |
| ATSG35643 | ATSG35643  | 0        | 0        | 0        | 0        | 0.662467 | 0        | 0        | 1.07889  | 0        | 0        | 1.330334 | 1.035907 | 0.091868 | NA       | 0.172208 | NA       | 0.377142 | NA       |
| ATSG35646 | ATSG35646  | 0        | 0        | 0        | 0        | 0        | 0        | 0        | 0        | 0        | 0        | 0        | 1.035907 | 0        | NA       | 0        | NA       | 0.172362 | NA       |
| ATSG35650 | ATSG35650  | 0        | 0        | 0        | 0        | 0        | 0        | 0        | 0        | 0        | 0        | 0        | 0        | #N/A     | #N/A     | #N/A     | #N/A     | #N/A     | #N/A     |
| ATSG35655 | ATSG35655  | 0        | 1.784246 | 0        | 0        | 0        | 0        | 0        | 0        | 0        | 0        | 0        | 0        | -0.2184  | NA       | -0.20558 | NA       | -0.19918 | NA       |
| ATSG35657 | ATSG35657  | 0        | 0        | 0        | 0        | 0        | 0        | 0        | 0        | 0        | 0        | 0        | 0        | #N/A     | #N/A     | #N/A     | #N/A     | #N/A     | #N/A     |
| ATSG35660 | ATSG35660  | 0        | 0        | 0        | 1.237247 | 0        | 0.996841 | 0        | 0        | 0        | 0        | 0        | 0        | 0.370903 | NA       | 0        | NA       | 0        | NA       |
| ATSG35670 | iqd33      | 80.84547 | 74.93833 | 86.27284 | 36.70499 | 32.4609  | 43.86099 | 49.80099 | 34.52448 | 35.14486 | 75.80331 | 73.16837 | 87.01615 | -1.0752  | 6.89E-06 | -0.96934 | 0.000137 | -0.03554 | 0.957023 |
| ATSG35680 | ATSG35680  | 391.1494 | 396.1026 | 414.6247 | 645.018  | 694.9282 | 547.2656 | 572.7114 | 455.2916 | 829.8091 | 389.5715 | 412.4035 | 598.754  | 0.629143 | 0.006409 | 0.606423 | 0.010722 | 0.2132   | 0.625386 |
| ATSG35688 | ATSG35688  | 0        | 0        | 0        | 0        | 0        | 0        | 1.07889  | 0        | 0        | 0        | 0        | 0        | 0        | NA       | 0.16673  | NA       | 0        | NA       |
| ATSG35690 | ATSG35690  | 614.6633 | 720.8354 | 643.8272 | 621.0979 | 635.3061 | 699.7822 | 811.0448 | 854.4808 | 685.3247 | 639.0507 | 715.7197 | 650.5493 | -0.01611 | 0.931652 | 0.248288 | 0.092891 | 0.020326 | 0.956388 |
| ATSG35695 | ATSG35695  | 0        | 0        | 0        | 0        | 0        | 0        | 0        | 0        | 0        | 0        | 0        | 0        | #N/A     | #N/A     | #N/A     | #N/A     | #N/A     | #N/A     |
| ATSG35698 | ATSG35698  | 0        | 0        | 0        | 0        | 0        | 0        | 0        | 0        | 0        | 0        | 0        | 0        | #N/A     | #N/A     | #N/A     | #N/A     | #N/A     | #N/A     |
| ATSG35700 | FIM5       | 248.4809 | 239.089  | 283.284  | 209.5071 | 247.1003 | 282.1059 | 232.9975 | 265.4069 | 169.8668 | 255.2365 | 303.3161 | 265.1921 | -0.06979 | 0.781895 | -0.20438 | 0.388602 | 0.088473 | 0.844779 |
| ATSG35710 | ATSG35710  | 0        | 0        | 0        | 0        | 0        | 0        | 0        | 0        | 0        | 0        | 0        | 0        | #N/A     | #N/A     | #N/A     | #N/A     | #N/A     | #N/A     |
| ATSG35715 | CYP7188    | 0        | 0        | 0        | 0        | 0.662467 | 0        | 1.778607 | 0        | 0        | 0.959536 | 0        | 0        | 0.086846 | NA       | 0.271724 | NA       | 0.147328 | NA       |
| ATSG35720 | ATSG35720  | 0        | 0        | 0        | 0        | 0.662467 | 0        | 1.778607 | 0        | 0        | 0        | 0        | 0        | 0.091702 | NA       | 0.255494 | NA       | 0        | NA       |
| ATSG35725 | ATSG35725  | 0        | 0        | 0        | 0        | 0        | 0        | 0        | 0        | 0        | 0        | 0        | 0        | #N/A     | #N/A     | #N/A     | #N/A     | #N/A     | #N/A     |
| ATSG35730 | ATSG35730  | 309.115  | 289.0479 | 311.6124 | 428.4998 | 351.1077 | 449.5752 | 383.2898 | 371.1381 | 270.4201 | 336.797  | 328.5925 | 309.7361 | 0.422512 | 0.015349 | 0.166402 | 0.42876  | 0.095864 | 0.798327 |
| ATSG35732 | ATSG35732  | 3.566712 | 0        | 2.57309  | 7.835896 | 5.962205 | 3.987363 | 5.335821 | 2.15778  | 9.76246  | 3.838143 | 7.982004 | 8.287252 | 0.849225 | 0.183347 | 0.782356 | 0.253334 | 0.917167 | NA       |
| ATSG35735 | ATSG35735  | 131.9683 | 203.404  | 154.5185 | 513.8698 | 539.9108 | 734.6717 | 1063.607 | 1131.756 | 1179.305 | 147.7685 | 114.4087 | 137.7756 | 1.827755 | 1.55E-23 | 2.728793 | 4.53E-52 | -0.26412 | 0.477378 |
| ATSG35736 | ATSG35736  | 0        | 0        | 0        | 0        | 0        | 0.889303 | 0        | 0        | 0        | 0        | 0        | 0        | 0        | NA       | 0.160764 | NA       | 0        | NA       |
| ATSG35737 | ATSG35737  | 0        | 0        | 0        | 0        | 0        | 0        | 0.976246 | 0        | 0        | 0.959536 | 0        | 0        | 0        | NA       | 0.16673  | NA       | 0        | NA       |
| ATSG35738 | ATSG35738  | 22.58917 | 17.84246 | 6.438272 | 14.84696 | 13.24935 | 9.968408 | 16.89677 | 22.65669 | 9.76246  | 17.27164 | 26.60668 | 14.50269 | -0.23309 | 0.675426 | 0.058506 | 0.928673 | 0.256692 | 0.789871 |
| ATSG35740 | ATSG35740  | 42.80054 | 51.74313 | 45.0679  | 24.74493 | 24.51129 | 28.90838 | 38.24005 | 17.26224 | 57.59851 | 48.93632 | 94.45371 | 52.83123 | -0.7587  | 0.047064 | -0.26158 | 0.572286 | 0.444865 | 0.486936 |
| ATSG35750 | AHK2       | 537.3846 | 449.63   | 412.0494 | 210.7444 | 212.652  | 294.068  | 309.4776 | 342.0081 | 236.2515 | 463.4557 | 476.2596 | 478.5888 | -0.95164 | 1.57E-07 | -0.64291 | 0.000767 | 0.017832 | 0.973218 |
| ATSG35753 | ATSG35753  | 83.22328 | 87.42806 | 95.28642 | 81.24587 | 65.58426 | 80.7441  | 86.26244 | 78.75897 | 51.74104 | 94.03449 | 98.44471 | 80.80071 | -0.21617 | 0.426123 | -0.28187 | 0.320041 | 0.035329 | 0.95696  |
| ATSG35756 | ATSG35756  | 0        | 0        | 1.287654 | 0        | 0        | 0.996841 | 0.889303 | 0        | 0        | 0.959536 | 0        | 0        | -0.0831  | NA       | -0.06297 | NA       | -0.04674 | NA       |
| ATSG35760 | ATSG35760  | 0        | 0        | 0        | 0.412416 | 0        | 0        | 0        | 0.976246 | 0        | 1.330334 | 0        | 0        | 0.064654 | NA       | 0.158339 | NA       | 0.193679 | NA       |
| ATSG35770 | SAP        | 2.377808 | 0        | 1.287654 | 0        | 1.324935 | 0        | 0.889303 | 1.07889  | 0        | 0.959536 | 0        | 0        | -0.38396 | NA       | -0.25765 | NA       | -0.41256 | NA       |
| ATSG35775 | ATSG35775  | 0        | 0        | 0        | 0        | 0        | 0        | 1.778607 | 0        | 0        | 0        | 0        | 1.035907 | 0        | NA       | 0.26262  | NA       | 0.150298 | NA       |
| ATSG35777 | ATSG35777  | 65.38972 | 67.80135 | 82.40988 | 22.68286 | 15.23675 | 19.93682 | 28.45771 | 36.68226 | 29.28738 | 56.6126  | 62.5257  | 49.72351 | -1.77737 | 2.24E-11 | -1.13869 | 3.66E-05 | -0.34364 | 0.463036 |
| ATSG35780 | ATSG35780  | 0        | 0        | 0        | 0        | 1.324935 | 0        | 1.778607 | 0        | 0.976246 | 0        | 0        | 0        | 0.209442 | NA       | 0.421571 | NA       | 0        | NA       |
| ATSG35790 | APG1       | 1948.614 | 2026.903 | 1895.427 | 1031.451 | 1047.361 | 1028.74  | 1076.947 | 1150.097 | 1112.92  | 1802.008 | 1644.293 | 1998.264 | -0.91036 | 1.83E-20 | -0.80745 | 5.12E-16 | -0.10617 | 0.591044 |
| ATSG35791 | ATSG35791  | 0        | 0        | 0        | 0        | 0        | 0        | 0.889303 | 0        | 0        | 0        | 0        | 0        | 0        | NA       | 0.160764 | NA       | 0        | NA       |
| ATSG35792 | ATSG35792  | 0        | 0        | 0        | 0        | 0.662467 | 0        | 0        | 0        | 0        | 0        | 1.330334 | 0        | 0.101524 | NA       | 0        | NA       | 0.179327 | NA       |
| ATSG35794 | ATSG35794  | 1.188904 | 0        | 0        | 0.412416 | 0        | 0        | 0        | 0        | 0        | 0        | 1.330334 | 0        | -0.13525 | NA       | -0.22145 | NA       | -0.00291 | NA       |
| ATSG35796 | ATSG35796  | 0        | 0        | 0        | 0.412416 | 0.662467 | 0        | 0        | 0        | 0        | 0        | 0        | 0        | 0.196313 | NA       | 0        | NA       | 0        | NA       |
| ATSG35798 | ATSG35798  | 0        | 0        | 0        | 0        | 0        | 0        | 0        | 0        | 0        | 0        | 0        | 0        | #N/A     | #N/A     | #N/A     | #N/A     | #N/A     | #N/A     |
| ATSG35800 | ATSG35800  | 0        | 0        | 0        | 0        | 0        | 0        | 0        | 0        | 0        | 0        | 0        | 0        | #N/A     | #N/A     | #N/A     | #N/A     | #N/A     | #N/A     |
| ATSG35802 | ATSG35802  | 0        | 0        | 1.287654 | 0        | 0        | 0.889303 | 0        | 0        | 0        | 0        | 0        | 0        | -0.21946 | NA       | -0.0473  | NA       | -0.20113 | NA       |
| ATSG35805 | ATSG35805  | 0        | 0        | 0        | 0        | 0        | 0        | 0        | 0        | 0        | 0        | 0        | 0        | #N/A     | #N/A     | #N/A     | #N/A     | #N/A     | #N/A     |
| ATSG35810 | ATSG35810  | 0        | 0        | 0        | 0        | 0        | 0        | 0        | 0        | 0        | 0        | 0        | 0        | #N/A     | #N/A     | #N/A     | #N/A     | #N/A     | #N/A     |
| ATSG35820 | ATSG35820  | 0        | 0        | 0        | 0        | 0        | 0        | 1.778607 | 0        | 0        | 0        | 0        | 0        | 0        | NA       | 0.248756 | NA       | 0        | NA       |
| ATSG35830 | ATSG35830  | 0        | 0        | 0        | 0        | 0        | 0        | 0        | 0        | 0        | 0        | 0        | 0        | #N/A     | #N/A     | #N/A     | #N/A     | #N/A     | #N/A     |
| ATSG35840 | PHYC       | 525.4955 | 446.0615 | 374.7074 | 300.2385 | 278.8987 | 296.0617 | 331.7102 | 332.2981 | 254.8002 | 404.924  | 448.3225 | 421.614  | -0.61108 | 0.000167 | -0.54236 | 0.001329 | -0.0797  | 0.83221  |
| ATSG35860 | ATSG35860  | 0        | 0        | 0        | 0        | 0        | 0        | 0        | 0        | 0        | 0        | 0        | 0        | #N/A     | #N/A     | #N/A     | #N/A     | #N/A     | #N/A     |
| ATSG35870 | ATSG35870  | 0        | 0        | 0        | 0        | 0.662467 | 0        | 0        | 0        | 0        | 0        | 0        | 1.035907 | 0.098893 | NA       | 0        | NA       | 0.150283 | NA       |
| ATSG35880 | ATSG35880  | 0        | 0        | 0        | 0        | 0        | 0        | 0        | 0        | 0        | 0        | 0        | 0        | #N/A     | #N/A     | #N/A     | #N/A     | #N/A     | #N/A     |
| ATSG35890 | ATSG35890  | 0        | 0        | 0        | 0        | 0.662467 | 0        | 0        | 0        | 0        | 0        | 0        | 0        | 0.128567 | NA       | 0        | NA       | 0        | NA       |
| ATSG35900 | LBD35      | 0        | 0        | 0        | 0        | 0        | 0        | 0        | 0        | 0        | 0        | 0        | 0        | #N/A     | #N/A     | #N/A     | #N/A     | #N/A     | #N/A     |
| ATSG35910 | ATSG35910  | 425.6276 | 297.9691 | 351.5296 | 313.8483 | 311.3596 | 365.8406 | 313.9241 | 375.4537 | 284.0876 | 338.7161 | 340.5655 | 354.28   | -0.12675 | 0.529168 | -0.14943 | 0.478031 | -0.06289 | 0.875865 |
| ATSG35912 | ATSG35912  |          |          |          |          |          |          |          |          |          |          |          |          |          |          |          |          |          |          |



|          |          |          |          |          |          |          |          |          |          |          |          |          |          |          |          |           |          |          |          |
|----------|----------|----------|----------|----------|----------|----------|----------|----------|----------|----------|----------|----------|----------|----------|----------|-----------|----------|----------|----------|
| ATSG6970 | NHL25    | 0        | 0        | 1.287654 | 3.71174  | 1.324935 | 1.993682 | 5.335821 | 1.07889  | 5.857476 | 0.959536 | 0        | 0        | 0.767951 | 0.256296 | 1.202561  | 0.06814  | -0.10828 | NA       |
| ATSG6980 | ATSG6980 | 1.188904 | 0        | 0        | 0.412416 | 0.662467 | 0        | 0.889303 | 3.23667  | 1.952492 | 0        | 1.330334 | 1.035907 | -0.1138  | 0.879383 | 0.697064  | 0.285377 | 0.142846 | NA       |
| ATSG6990 | ATSG6990 | 0        | 0        | 0        | 0        | 0        | 0        | 0.889303 | 0        | 0        | 0        | 0        | 0        | 0        | 0        | 0.160764  | NA       | 0        | NA       |
| ATSG7000 | ATSG7000 | 48.74506 | 33.90067 | 47.64321 | 28.04426 | 18.54908 | 35.88627 | 29.34701 | 23.73558 | 22.45366 | 59.49121 | 54.54369 | 53.86714 | -0.65827 | 0.037334 | -0.74242  | 0.028086 | 0.332804 | 0.543675 |
| ATSG7010 | ATSG7010 | 107.0014 | 110.6233 | 103.0123 | 99.39215 | 96.05775 | 103.6714 | 92.48756 | 92.78453 | 108.3633 | 129.5373 | 162.3007 | 117.0574 | -0.09843 | 0.690079 | -0.12108  | 0.646782 | 0.335622 | 0.296514 |
| ATSG7017 | ATSG7017 | 0        | 0        | 0        | 0        | 0        | 0        | 0        | 0        | 0        | 0        | 0        | 0        | #N/A     | #N/A     | #N/A      | #N/A     | #N/A     | #N/A     |
| ATSG7020 | ARF8     | 580.1851 | 422.8663 | 378.5704 | 211.1568 | 186.8158 | 285.0965 | 208.097  | 234.1191 | 127.8882 | 459.6176 | 453.6439 | 438.1885 | -0.98554 | 1.966-05 | -1.22995  | 9.87E-08 | -0.03225 | 0.960136 |
| ATSG7030 | ATSG7030 | 0        | 0        | 0        | 0        | 0        | 0        | 0        | 0        | 0        | 0        | 0        | 0        | #N/A     | #N/A     | #N/A      | #N/A     | #N/A     | #N/A     |
| ATSG7040 | ATSG7040 | 0        | 0        | 0        | 0        | 0        | 0        | 0        | 0        | 0        | 0        | 0        | 0        | #N/A     | #N/A     | #N/A      | #N/A     | #N/A     | #N/A     |
| ATSG7050 | ATSG7050 | 1.188904 | 1.784246 | 0        | 0.412416 | 0        | 2.990522 | 1.778607 | 2.15778  | 0        | 0        | 0        | 0        | 0.044301 | 0.953476 | 0.160038  | 0.830443 | -0.464   | NA       |
| ATSG7055 | SWC6     | 82.03437 | 101.702  | 109.4506 | 160.4297 | 184.1659 | 129.5893 | 120.056  | 126.2301 | 174.748  | 102.6703 | 131.7031 | 98.41112 | 0.679619 | 0.003397 | 0.506137  | 0.044686 | 0.171589 | 0.724668 |
| ATSG7060 | CHX24    | 0        | 0        | 0        | 0        | 0        | 0.996841 | 0.889303 | 0        | 0        | 0.959536 | 0        | 1.035907 | 0.129725 | NA       | 0.152948  | NA       | 0.344899 | NA       |
| ATSG7070 | ATSG7070 | 105.8125 | 164.1506 | 136.4914 | 269.7198 | 285.5234 | 234.2576 | 191.2002 | 226.5669 | 359.2585 | 112.2657 | 94.45371 | 135.7038 | 0.92863  | 0.000184 | 0.903318  | 0.000374 | -0.22216 | 0.662398 |
| ATSG7072 | ATSG7072 | 9.511232 | 5.352738 | 14.1642  | 3.71174  | 4.637271 | 0.996841 | 6.225124 | 4.31556  | 3.904984 | 9.595356 | 13.30334 | 14.50269 | -1.18781 | 0.029898 | -0.78046  | 0.199751 | 0.280628 | NA       |
| ATSG7080 | ATSG7080 | 0        | 0        | 0        | 0        | 0        | 0        | 0.889303 | 2.15778  | 0        | 0        | 0        | 0        | 0        | 0        | 0.47993   | NA       | 0        | NA       |
| ATSG7090 | ATSG7090 | 0        | 0        | 0        | 0        | 0        | 0        | 0        | 0        | 0        | 0        | 0        | 0        | #N/A     | #N/A     | #N/A      | #N/A     | #N/A     | #N/A     |
| ATSG7100 | ATSG7100 | 0        | 0        | 0        | 0        | 0        | 0        | 0        | 0        | 0        | 0        | 0        | 0        | #N/A     | #N/A     | #N/A      | #N/A     | #N/A     | #N/A     |
| ATSG7110 | ATSG7110 | 1.188904 | 0        | 0        | 0        | 0.662467 | 0        | 0.889303 | 0        | 0        | 0        | 0        | 0        | -0.09199 | NA       | -0.04588  | NA       | -0.20606 | NA       |
| ATSG7120 | ATSG7120 | 0        | 0        | 0        | 0        | 0        | 0        | 0        | 1.07889  | 0        | 0        | 0        | 0        | 0        | 0        | 0.16673   | NA       | 0        | NA       |
| ATSG7125 | ATSG7125 | 0        | 0        | 0        | 0        | 0        | 0        | 0        | 0        | 0        | 0        | 0        | 0        | #N/A     | #N/A     | #N/A      | #N/A     | #N/A     | #N/A     |
| ATSG7130 | ATSG7130 | 480.3172 | 460.3355 | 457.1173 | 434.686  | 471.6767 | 457.5499 | 476.6667 | 460.686  | 377.8072 | 428.9124 | 478.9202 | 426.7935 | -0.03719 | 0.833614 | -0.08735  | 0.617573 | -0.06913 | 0.819307 |
| ATSG7140 | ATSG7140 | 0        | 0        | 0        | 0        | 0        | 0.996841 | 1.778607 | 1.07889  | 0        | 0        | 0        | 0        | 0.130703 | NA       | 0.45805   | NA       | 0        | NA       |
| ATSG7145 | ATSG7145 | 1.188904 | 0        | 1.287654 | 0        | 0.662467 | 0        | 0        | 0        | 0        | 0        | 0        | 0        | -0.30133 | NA       | -0.43664  | NA       | -0.42841 | NA       |
| ATSG7150 | ATSG7150 | 0        | 0        | 0        | 0        | 0        | 0        | 0.889303 | 0        | 0        | 0        | 0        | 0        | 0        | 0        | 0.160764  | NA       | 0        | NA       |
| ATSG7160 | ATSG7160 | 0        | 0        | 0        | 1.237247 | 0        | 0.996841 | 0.889303 | 1.07889  | 0        | 0        | 0        | 0        | 0.41441  | NA       | 0.334699  | NA       | 0        | NA       |
| ATSG7170 | ATSG7170 | 0        | 0        | 0        | 0        | 0        | 0        | 0        | 0        | 0        | 0        | 0        | 0        | #N/A     | #N/A     | #N/A      | #N/A     | #N/A     | #N/A     |
| ATSG7175 | ATSG7175 | 1.188904 | 1.784246 | 0        | 0        | 0        | 0        | 0        | 0        | 0        | 0        | 0        | 0        | -0.49674 | NA       | -0.47297  | NA       | -0.46632 | NA       |
| ATSG7180 | SUS5     | 17.83356 | 12.48972 | 30.9037  | 9.485558 | 5.299738 | 7.974726 | 20.45398 | 7.55223  | 5.857476 | 22.06932 | 10.64267 | 16.5745  | -1.16766 | 0.017673 | -0.70142  | 0.201859 | -0.25905 | NA       |
| ATSG7190 | CIP4     | 235.403  | 224.815  | 181.5593 | 167.0283 | 166.9418 | 170.4598 | 150.2923 | 183.4113 | 167.9143 | 219.7337 | 191.5681 | 234.1149 | -0.34048 | 0.052043 | -0.35     | 0.059845 | 0.014187 | 0.976974 |
| ATSG7200 | ATSG7200 | 0        | 0        | 0        | 0        | 0        | 0        | 0        | 0        | 0        | 0        | 0        | 0        | #N/A     | #N/A     | #N/A      | #N/A     | #N/A     | #N/A     |
| ATSG7210 | ATSG7210 | 1.188904 | 0        | 2.575309 | 0.412416 | 0.662467 | 0        | 0        | 0        | 1.952492 | 0        | 0        | 0        | -0.41878 | NA       | -0.26216  | NA       | -0.61869 | NA       |
| ATSG7220 | ATSG7220 | 0        | 0        | 0        | 0        | 0        | 0        | 0        | 0        | 0        | 0        | 0        | 0        | #N/A     | #N/A     | #N/A      | #N/A     | #N/A     | #N/A     |
| ATSG7230 | ATSG7230 | 1.188904 | 0        | 0        | 0        | 0        | 0        | 0        | 0        | 0        | 0        | 0        | 0        | -0.2184  | NA       | -0.20558  | NA       | -0.19918 | NA       |
| ATSG7240 | ATSG7240 | 2.377808 | 1.784246 | 1.287654 | 0.412416 | 3.312336 | 0.996841 | 1.778607 | 2.15778  | 2.928738 | 0.959536 | 2.660668 | 2.071813 | -0.13469 | 0.871175 | 0.161144  | 0.853242 | 0.005852 | NA       |
| ATSG7250 | ATSG7250 | 0        | 0        | 0        | 2.474493 | 0.662467 | 0        | 0.889303 | 1.07889  | 1.952492 | 0.959536 | 0        | 0        | 0.578405 | NA       | 0.60547   | NA       | 0.150136 | NA       |
| ATSG7260 | RVE2     | 17.83356 | 12.48972 | 21.89012 | 27.63184 | 42.39791 | 39.87363 | 306.8097 | 318.2725 | 407.0946 | 29.7456  | 29.26735 | 47.6517  | 0.876399 | 0.007883 | 0.4019189 | 5.02E-46 | 0.876859 | 0.05827  |
| ATSG7270 | ATSG7270 | 1.188904 | 0        | 0        | 0.662467 | 0        | 0        | 0        | 0        | 1.952492 | 0        | 0        | 0        | -0.0985  | NA       | -0.106534 | NA       | -0.20005 | NA       |
| ATSG7280 | ATSG7280 | 0        | 0        | 0        | 0        | 0        | 0        | 0        | 0        | 0        | 0        | 0        | 0        | #N/A     | #N/A     | #N/A      | #N/A     | #N/A     | #N/A     |
| ATSG7290 | ATSG7290 | 71.33424 | 76.72258 | 69.53333 | 78.35896 | 97.38269 | 63.79781 | 64.91915 | 69.04896 | 71.26596 | 62.36982 | 63.85603 | 82.87252 | 0.149518 | 0.601982 | -0.07772  | 0.81926  | -0.04804 | 0.940181 |
| ATSG7300 | WSD1     | 156.9353 | 126.6815 | 99.14938 | 46.60296 | 43.72284 | 31.8989  | 41.79726 | 37.76115 | 12.6912  | 198.6239 | 170.2827 | 168.8528 | -1.53165 | 4.91E-08 | -1.90987  | 6.38E-11 | 0.468907 | 0.304362 |
| ATSG7310 | TMN4     | 300.7927 | 189.1301 | 206.0247 | 209.0947 | 203.3775 | 240.2386 | 239.2226 | 216.8569 | 208.9166 | 227.4099 | 186.2468 | 227.8994 | -0.10464 | 0.662388 | -0.07302  | 0.785469 | -0.12037 | 0.772122 |
| ATSG7320 | ATSG7320 | 0        | 0        | 0        | 1.987402 | 0.996841 | 0        | 0        | 0        | 0        | 0        | 0        | 0        | 0.458639 | NA       | 0         | 0        | 0        | NA       |
| ATSG7330 | ATSG7330 | 0        | 0        | 0        | 0        | 0        | 0        | 0        | 0        | 0        | 0        | 1.330334 | 0        | 0        | 0        | 0         | 0        | 0.172362 | NA       |
| ATSG7340 | ATSG7340 | 68.95643 | 74.93833 | 84.98519 | 80.00862 | 76.8462  | 55.82308 | 65.80846 | 58.26006 | 58.57476 | 81.56053 | 69.17737 | 80.80071 | -0.07878 | 0.791367 | -0.3101   | 0.26472  | 0.023003 | 0.97247  |
| ATSG7350 | ATSG7350 | 253.2635 | 242.6575 | 292.2975 | 312.611  | 319.3092 | 292.0743 | 300.5846 | 289.1425 | 316.3037 | 232.2076 | 232.8084 | 205.1095 | 0.22531  | 0.139485 | 0.194673  | 0.242015 | -0.23638 | 0.330378 |
| ATSG7351 | ATSG7351 | 0        | 0        | 0        | 0        | 0        | 0        | 0        | 0        | 0        | 0        | 0        | 0        | #N/A     | #N/A     | #N/A      | #N/A     | #N/A     | #N/A     |
| ATSG7352 | ATSG7352 | 1.188904 | 0        | 2.575309 | 3.71174  | 1.324935 | 1.993682 | 0.889303 | 4.31556  | 4.88123  | 0.959536 | 1.330334 | 1.035907 | 0.388026 | 0.606178 | 0.628096  | 0.39845  | -0.12222 | NA       |
| ATSG7360 | ATSG7360 | 1313.739 | 1434.534 | 1368.777 | 762.9688 | 768.462  | 667.8833 | 913.3147 | 879.2953 | 890.3363 | 1065.303 | 1553.83  | 1540.393 | -0.89273 | 7.61E-21 | -0.61169  | 4.6E-10  | 0.191474 | 0.225468 |
| ATSG7370 | ATSR11   | 517.1732 | 517.4313 | 561.4173 | 729.1507 | 667.767  | 592.1234 | 584.2724 | 592.3106 | 581.8426 | 556.5307 | 536.1246 | 515.8815 | 0.318911 | 0.011108 | 0.137259  | 0.35823  | 0.01045  | 0.977277 |
| ATSG7380 | ATSG7380 | 208.0582 | 205.1883 | 200.8741 | 207.0326 | 217.2893 | 206.346  | 230.3296 | 228.7247 | 220.6316 | 167.9187 | 172.9434 | 198.8941 | 0.038007 | 0.845368 | 0.144351  | 0.428898 | -0.18247 | 0.512425 |
| ATSG7381 | ATSG7381 | 0        | 0        | 0        | 0        | 0        | 0        | 0.889303 | 0        | 0.959536 | 0        | 0        | 0        | 0.13694  | NA       | 0.13694   | NA       | 0.147196 | NA       |
| ATSG7383 | ATSG7383 | 1.188904 | 0        | 0        | 0        | 0        | 0        | 0.889303 | 0        | 0        | 0        | 0        | 0        | -0.20902 | NA       | -0.03919  | NA       | -0.19148 | NA       |
| ATSG7385 | ATSG7385 | 1.188904 | 0        | 0        | 0        | 0        | 0        | 0        | 0        | 0        | 0        | 0        | 0        | -0.2184  | NA       | -0.20558  | NA       | -0.19918 | NA       |
| ATSG7390 | ATSG7390 | 0        | 0        | 0        | 0        | 0        | 0        | 0        | 0        | 0        | 0        | 0        | 0        | #N/A     | #N/A     | #N/A      | #N/A     | #N/A     | #N/A     |
| ATSG7400 | ATSG7400 | 27.34479 | 21.41095 | 21.89012 | 16.08421 | 17.22415 | 23.92418 | 19.56468 | 20.49891 | 26.35864 | 19.19071 | 18.62468 | 34.18492 | -0.31783 | 0.462785 | -0.08979  | 0.866274 | 0.024595 | 0.982852 |
| ATSG7410 | ATSG7410 | 46.36725 | 30.33218 | 33.47901 | 22.27044 | 18.54908 | 17.94313 | 25.7898  | 22.65669 | 39.04984 | 46.05771 | 33.25835 | 37.29264 | -0.83558 | 0.013107 | -0.3211   | 0.424784 | 0.071259 | 0.932283 |
| ATSG7415 | AGL105   | 0        | 0        | 0        | 0        | 0.662467 | 0        | 0.889303 | 1.07889  | 0        | 0        | 0        | 0        | 0.109123 | NA       | 0.333186  | NA       | 0        | NA       |
| ATSG7420 | ATSG7420 | 1.188904 | 0        | 3.862963 | 0.412416 | 0.662467 | 2.990522 | 0.889303 | 1.07889  | 0.976246 | 1.919071 | 0        | 0        | -0.19421 | 0.802249 | -0.29863  | 0.697196 | -0.42829 | NA       |
| ATSG7430 | ATSG7430 | 0        | 1.784246 | 0        | 0.412416 | 1.324935 | 0        | 1.778607 | 0        | 0        | 0        | 0        | 1.035907 | 0.04504  | NA       | 0.048912  | NA       | -0.07819 | NA       |
| ATSG7440 | ATSG7440 | 11.88904 | 33.90067 | 29.61605 | 49.48987 | 41.73544 | 48.8452  | 38.24005 | 28.05114 | 26.35864 | 29.7456  | 27.93701 | 22.78994 | 0.866128 | 0.011672 | 0.311221  | 0.472339 | 0.119216 | 0.888561 |
| ATSG7442 | ATSG7442 | 0        | 0        | 0        | 0        | 0        | 0        | 0        | 0        | 0        | 0        | 0        | 0        | #N/A     | #N/A     | #N/A      | #N/A     | #N/A     | #N/A     |
| ATSG7445 | ATSG7445 | 0        | 0        | 0        | 0        | 0        | 0        | 0        | 0.976246 | 0        | 0        | 0        | 0        | 0        | 0        | 0.16673   | NA       | 0        | NA       |
| ATSG7450 | ATSG7450 | 4.755616 | 3.568492 | 2.575309 | 1.237247 | 0.662467 | 0.996841 | 0        | 3.236    |          |          |          |          |          |          |           |          |          |          |



|           |           |          |          |          |          |          |          |          |          |          |          |          |          |          |          |          |          |          |          |
|-----------|-----------|----------|----------|----------|----------|----------|----------|----------|----------|----------|----------|----------|----------|----------|----------|----------|----------|----------|----------|
| ATSG37800 | BHLH86    | 0        | 0        | 0        | 0.412416 | 0        | 0        | 1.778607 | 0        | 0.976246 | 0        | 0        | 1.035907 | 0.045733 | NA       | 0.46996  | NA       | 0.176464 | NA       |
| ATSG37810 | NIP4-1    | 0        | 0        | 0        | 0        | 0        | 0        | 0        | 0        | 0        | 1.919071 | 0        | 0        | 0        | NA       | 0        | NA       | 0.256851 | NA       |
| ATSG37820 | NIP4-2    | 0        | 0        | 0        | 0        | 0        | 0        | 0        | 0        | 0        | 0        | 0        | 0        | #N/A     | #N/A     | #N/A     | #N/A     | #N/A     | #N/A     |
| ATSG37830 | OXF1      | 741.8761 | 569.1745 | 475.1445 | 405.4045 | 341.1706 | 461.5373 | 493.5634 | 576.1272 | 391.4746 | 441.3864 | 428.3675 | 467.1938 | -0.55273 | 0.00641  | -0.28411 | 0.217171 | -0.40767 | 0.1832   |
| ATSG37840 | ATSG37840 | 0        | 0        | 0        | 0.412416 | 1.324935 | 1.993682 | 1.778607 | 0        | 0.976246 | 0        | 0        | 1.035907 | 0.604288 | NA       | 0.474942 | NA       | 0.167094 | NA       |
| ATSG37850 | PK        | 481.5061 | 513.8629 | 611.6358 | 588.1046 | 646.5681 | 661.9023 | 747.0149 | 708.8307 | 704.8496 | 535.4209 | 428.3675 | 585.2782 | 0.23284  | 0.153902 | 0.402424 | 0.007205 | -0.04935 | 0.892499 |
| ATSG37860 | ATSG37860 | 1.188904 | 1.784246 | 0        | 0.824831 | 0.662467 | 0        | 0.889303 | 0        | 0.959536 | 1.330334 | 1.035907 | 0        | -0.20669 | NA       | -0.33989 | NA       | 0.088322 | NA       |
| ATSG37870 | ATSG37870 | 0        | 0        | 0        | 0        | 0        | 0        | 0        | 0        | 0.976246 | 0.959536 | 0        | 0        | 0        | NA       | 0.148271 | NA       | 0.148275 | NA       |
| ATSG37872 | ATSG37872 | 0        | 0        | 0        | 0        | 0        | 0        | 0.889303 | 0        | 0        | 0        | 0        | 2.071813 | 0        | NA       | 0.133076 | NA       | 0.29577  | NA       |
| ATSG37875 | ATSG37875 | 0        | 0        | 0        | 0        | 0        | 0        | 0        | 0        | 0        | 0        | 0        | 0        | #N/A     | #N/A     | #N/A     | #N/A     | #N/A     | #N/A     |
| ATSG37880 | ATSG37880 | 0        | 0        | 0        | 0        | 0        | 0        | 0        | 0        | 0        | 0        | 0        | 2.071813 | 0        | NA       | 0        | NA       | 0.262302 | NA       |
| ATSG37890 | ATSG37890 | 118.8904 | 132.0342 | 137.779  | 169.9152 | 177.5412 | 147.5324 | 158.296  | 138.0979 | 142.5319 | 156.4043 | 163.6311 | 133.6319 | 0.351543 | 0.059279 | 0.17613  | 0.428981 | 0.217172 | 0.51334  |
| ATSG37900 | ATSG37900 | 1.188904 | 0        | 0        | 0        | 0        | 0        | 0        | 0        | 0        | 0        | 0        | 0        | -0.2184  | NA       | -0.20558 | NA       | -0.19918 | NA       |
| ATSG37910 | ATSG37910 | 0        | 0        | 0        | 0        | 0        | 0        | 0        | 0        | 0        | 0        | 0        | 0        | #N/A     | #N/A     | #N/A     | #N/A     | #N/A     | #N/A     |
| ATSG37920 | ATSG37920 | 0        | 0        | 0        | 0.662467 | 0        | 1.778607 | 0        | 0        | 0.959536 | 0        | 0        | 0        | 0.086846 | NA       | 0.271724 | NA       | 0.147328 | NA       |
| ATSG37930 | ATSG37930 | 193.7913 | 208.7568 | 224.0519 | 304.7751 | 270.2866 | 260.1754 | 228.551  | 262.1703 | 270.4201 | 228.3695 | 232.8084 | 246.5458 | 0.415879 | 0.007375 | 0.275156 | 0.113529 | 0.173647 | 0.551502 |
| ATSG37940 | ATSG37940 | 87.97889 | 82.07532 | 65.67037 | 2.886909 | 8.612075 | 0        | 3.557214 | 10.7889  | 0        | 156.4043 | 142.3457 | 131.5601 | -2.54757 | 1.04E-05 | -2.39704 | 4.46E-05 | 0.654042 | 0.543547 |
| ATSG37950 | ATSG37950 | 45.17835 | 26.76369 | 33.47901 | 3.299325 | 1.987402 | 0.996841 | 2.66791  | 2.15778  | 0        | 32.62421 | 42.57069 | 34.18492 | -3.21789 | 5.06E-14 | -3.31427 | 9.7E-13  | 0.037205 | 0.971681 |
| ATSG37960 | ATSG37960 | 4.755616 | 0        | 1.287654 | 0        | 0        | 0        | 0        | 0        | 1.952492 | 0.959536 | 2.660668 | 3.10772  | -1.05393 | 0.08372  | -0.57185 | 0.408335 | 0.044206 | NA       |
| ATSG37970 | ATSG37970 | 0        | 0        | 0        | 0        | 0        | 0        | 0        | 0        | 0        | 6.716749 | 3.991002 | 4.143626 | 0        | 1        | 0        | 0        | 1.855349 | NA       |
| ATSG37980 | ATSG37980 | 5.94452  | 8.92123  | 0        | 2.062078 | 0.662467 | 0        | 0.889303 | 0        | 1.952492 | 4.797678 | 2.660668 | 3.10772  | -1.0732  | 0.105425 | -1.05426 | 0.12558  | -0.23016 | NA       |
| ATSG37990 | ATSG37990 | 0        | 0        | 0        | 0.824831 | 0        | 1.993682 | 0.889303 | 1.07889  | 1.952492 | 0        | 1.330334 | 2.071813 | 0.421184 | 0.515756 | 0.618297 | 0.33137  | 0.526043 | NA       |
| ATSG38000 | ATSG38000 | 27.34479 | 14.27397 | 20.60247 | 3.71174  | 1.987402 | 0        | 1.778607 | 2.15778  | 3.904984 | 23.98839 | 39.91002 | 25.89766 | -2.4944  | 1.51E-07 | -2.27318 | 5.04E-06 | 0.460136 | NA       |
| ATSG38005 | ATSG38005 | 7.133424 | 10.70548 | 6.438272 | 7.42348  | 11.26194 | 1.993682 | 3.557214 | 2.15778  | 4.88123  | 7.676285 | 7.982004 | 6.215439 | -0.0918  | 1.900911 | -0.79982 | 0.215251 | -0.08747 | NA       |
| ATSG38010 | UGT76E9   | 40.42273 | 32.11643 | 27.04074 | 7.011065 | 7.28714  | 0.996841 | 3.557214 | 4.31556  | 8.786214 | 32.62421 | 29.26735 | 18.64632 | -2.20121 | 1.5E-07  | -2.15677 | 1.12E-06 | -0.27499 | 0.743574 |
| ATSG38020 | ATSG38020 | 2.377808 | 0        | 2.575309 | 4.948987 | 3.312336 | 3.987363 | 7.114428 | 7.55223  | 11.71495 | 3.88143  | 3.991002 | 1.035907 | 0.626077 | 0.354864 | 1.444006 | 0.019966 | 0.306603 | NA       |
| ATSG38030 | ATSG38030 | 1.188904 | 0        | 2.575309 | 0.973143 | 3.974804 | 8.971567 | 7.82338  | 10.7889  | 8.57476  | 2.878607 | 2.660668 | 1.035907 | 1.378974 | 0.510003 | 1.56375  | 0.011003 | 0.220002 | NA       |
| ATSG38035 | ATSG38035 | 2.377808 | 0        | 0        | 0        | 0        | 0        | 1.07889  | 0        | 1.919071 | 1.330334 | 0        | 0        | -0.47918 | NA       | -0.23061 | NA       | 0.107537 | NA       |
| ATSG38037 | ATSG38037 | 0        | 0        | 0        | 0        | 0        | 0        | 0        | 0        | 0        | 0        | 0        | 1.035907 | 0        | NA       | 0        | NA       | 0.172362 | NA       |
| ATSG38040 | UGT76E7   | 39.23383 | 37.46917 | 46.35556 | 34.23049 | 35.11077 | 30.90206 | 60.47264 | 44.23449 | 29.28738 | 59.49121 | 55.87403 | 34.18492 | -0.27582 | 0.463149 | 0.114485 | 0.797465 | 0.254533 | 0.691086 |
| ATSG38050 | ATSG38050 | 58.25629 | 53.52738 | 68.24568 | 89.9066  | 81.48347 | 73.76622 | 77.3694  | 80.91675 | 71.26596 | 86.35821 | 66.5167  | 70.44614 | 0.433236 | 0.072274 | 0.32668  | 0.228134 | 0.297563 | 0.481893 |
| ATSG38060 | ATSG38060 | 13.07794 | 21.41095 | 20.60247 | 22.68286 | 17.22415 | 9.968408 | 14.22886 | 14.02557 | 29.28738 | 32.62421 | 29.26735 | 22.78994 | -0.06848 | 0.904204 | 0.068846 | 0.908744 | 0.563462 | 0.43068  |
| ATSG38070 | ATSG38070 | 11.88904 | 5.352738 | 14.1642  | 9.485558 | 14.54288 | 10.96525 | 16.00746 | 9.710009 | 8.786214 | 21.10978 | 19.95501 | 16.5745  | 0.067708 | 0.912123 | 0.075454 | 0.908605 | 0.706418 | NA       |
| ATSG38080 | ATSG38080 | 0        | 0        | 1.287654 | 0.412416 | 1.324935 | 0        | 0.889303 | 0        | 0        | 0.959536 | 0        | 0        | 0.092705 | NA       | -0.07402 | NA       | -0.05399 | NA       |
| ATSG38090 | ATSG38090 | 0        | 0        | 0        | 0        | 0        | 0        | 0        | 0        | 0        | 0        | 0        | 0        | #N/A     | #N/A     | #N/A     | #N/A     | #N/A     | #N/A     |
| ATSG38095 | ATSG38095 | 2.377808 | 0        | 1.287654 | 0        | 0        | 0        | 0        | 0        | 1.952492 | 1.919071 | 2.660668 | 3.10772  | -0.82027 | 0.186749 | -0.30331 | 0.682329 | 0.464    | NA       |
| ATSG38100 | ATSG38100 | 0        | 0        | 0        | 1.237247 | 0.662467 | 0.996841 | 1.778607 | 1.07889  | 0.976246 | 0.959536 | 3.991002 | 2.071813 | 0.466183 | 0.498428 | 0.62178  | 0.365362 | 0.995592 | NA       |
| ATSG38110 | AF51B     | 108.1903 | 101.702  | 126.1901 | 163.729  | 184.1659 | 145.5388 | 164.5211 | 132.7035 | 171.8193 | 200.5429 | 194.2288 | 166.781  | 0.538176 | 0.005612 | 0.464069 | 0.052588 | 0.714522 | 0.002625 |
| ATSG38120 | 4CLL8     | 36.85602 | 44.60615 | 23.17778 | 3.299325 | 6.624673 | 5.981045 | 11.56095 | 6.47334  | 5.857476 | 30.70514 | 38.57969 | 29.00538 | -2.384   | 1.9E-09  | -1.82166 | 9.25E-06 | -0.066   | 0.947468 |
| ATSG38130 | ATSG38130 | 4.755616 | 1.784246 | 1.287654 | 0.824831 | 0        | 0.996841 | 1.778607 | 0        | 0.976246 | 1.919071 | 5.321336 | 5.179533 | -0.90944 | 0.177366 | -0.64138 | 0.386541 | 0.387082 | NA       |
| ATSG38140 | NFYC10    | 347.16   | 310.4588 | 334.7901 | 172.8021 | 184.1659 | 168.4661 | 164.5211 | 195.2791 | 164.0093 | 359.8259 | 416.3945 | 340.8132 | -0.90585 | 2.03E-10 | -0.91382 | 5.67E-10 | 0.161518 | 0.552524 |
| ATSG38150 | PMI15     | 677.6752 | 606.6437 | 558.842  | 266.4205 | 235.1759 | 289.0838 | 240.1119 | 329.0614 | 299.7075 | 569.0046 | 453.6439 | 608.0771 | -1.20032 | 1.37E-13 | -1.06633 | 1.15E-10 | -0.17124 | 0.594257 |
| ATSG38155 | ATSG38155 | 0        | 0        | 0        | 0        | 0        | 0        | 0        | 0        | 0        | 0        | 0        | 0        | #N/A     | #N/A     | #N/A     | #N/A     | #N/A     | #N/A     |
| ATSG38160 | ATSG38160 | 0        | 0        | 0        | 0        | 0        | 0        | 0        | 0        | 0        | 0        | 0        | 0        | #N/A     | #N/A     | #N/A     | #N/A     | #N/A     | #N/A     |
| ATSG38170 | ATSG38170 | 0        | 0        | 0        | 0        | 0        | 0        | 0        | 0        | 0        | 0        | 0        | 0        | #N/A     | #N/A     | #N/A     | #N/A     | #N/A     | #N/A     |
| ATSG38180 | ATSG38180 | 0        | 0        | 0        | 0        | 0        | 0        | 0        | 0        | 0        | 0        | 0        | 0        | #N/A     | #N/A     | #N/A     | #N/A     | #N/A     | #N/A     |
| ATSG38190 | ATSG38190 | 0        | 0        | 0        | 0        | 0        | 0        | 0        | 1.07889  | 0.976246 | 0        | 0        | 0        | 0        | NA       | 0.333168 | NA       | 0        | NA       |
| ATSG38192 | ATSG38192 | 0        | 0        | 0        | 0        | 0        | 0.996841 | 0.889303 | 1.07889  | 0        | 0        | 0        | 0        | 0.143396 | NA       | 0.329961 | NA       | 0        | NA       |
| ATSG38195 | ATSG38195 | 0        | 0        | 0        | 0        | 0        | 0        | 0        | 0        | 0        | 0        | 0        | 0        | #N/A     | #N/A     | #N/A     | #N/A     | #N/A     | #N/A     |
| ATSG38197 | ATSG38197 | 0        | 0        | 0        | 0        | 0        | 0        | 0        | 0        | 0        | 0        | 0        | 0        | #N/A     | #N/A     | #N/A     | #N/A     | #N/A     | #N/A     |
| ATSG38200 | ATSG38200 | 7.133424 | 7.136984 | 30.9037  | 6.598649 | 3.974804 | 8.971567 | 15.11816 | 5.39445  | 6.833722 | 14.39303 | 13.30334 | 18.64632 | -0.97    | 0.077653 | -0.56428 | 0.365678 | 0.021063 | NA       |
| ATSG38210 | ATSG38210 | 34.47821 | 23.1952  | 21.89012 | 52.78919 | 64.25933 | 39.87363 | 43.57587 | 42.07671 | 59.51501 | 13.4335  | 14.63367 | 20.71813 | 0.910384 | 0.005727 | 0.788614 | 0.025243 | -0.63913 | 0.277049 |
| ATSG38212 | ATSG38212 | 45.17835 | 33.90067 | 30.9037  | 49.48987 | 40.4105  | 64.79465 | 95.15547 | 90.62675 | 33.19236 | 41.26003 | 39.91002 | 38.32854 | 0.4263   | 0.286563 | 0.898446 | 0.016424 | 0.098097 | 0.914481 |
| ATSG38220 | ATSG38220 | 145.0463 | 173.0719 | 132.6284 | 171.1525 | 153.0299 | 157.5008 | 197.4254 | 171.5435 | 146.4369 | 149.6876 | 127.7121 | 183.3555 | 0.105452 | 0.667043 | 0.198959 | 0.409548 | 0.045461 | 0.929373 |
| ATSG38230 | ATSG38230 | 2.377808 | 5.352738 | 7.725926 | 0        | 0        | 0.996841 | 1.778607 | 2.15778  | 1.952492 | 3.88143  | 6.65167  | 9.323159 | -1.8187  | 0.00332  | -0.82634 | 0.242015 | 0.304258 | NA       |
| ATSG38240 | ATSG38240 | 35.66712 | 57.09587 | 42.49299 | 98.15491 | 90.75802 | 125.6019 | 114.7201 | 92.78453 | 77.12343 | 32.62421 | 46.56169 | 34.18492 | 1.173628 | 7.39E-06 | 1.045659 | 0.000125 | -0.23135 | 0.695339 |
| ATSG38250 | ATSG38250 | 5.94452  | 5.352738 | 2.575309 | 138.1592 | 128.5187 | 144.5419 | 61.36194 | 43.1556  | 42.95482 | 1.919071 | 2.660668 | 3.10772  | 4.278228 | 3.86E-30 | 2.838302 | 5.2E-13  | -0.52122 | 0.587439 |
| ATSG38260 | ATSG38260 | 0        | 0        | 0        | 0.824831 | 3.312336 | 0        | 2.66791  | 3.23667  | 0        | 0        | 0        | 0        | 0.575482 | 0.367881 | 0.746664 | 0.241873 | 0.467456 | NA       |
| ATSG38270 | ATSG38270 | 0        | 0        | 0        | 0        | 0        | 0        | 0        | 0        | 0        | 0        | 0        | 0        | #N/A     | #N/A     | #N/A     | #N/A     | #N/A     | #N/A     |
| ATSG38275 | ATSG38275 | 0        | 0        | 0        | 0        | 0        |          |          |          |          |          |          |          |          |          |          |          |          |          |



|           |           |          |          |          |          |          |          |          |          |           |          |          |          |           |            |          |          |          |          |
|-----------|-----------|----------|----------|----------|----------|----------|----------|----------|----------|-----------|----------|----------|----------|-----------|------------|----------|----------|----------|----------|
| ATSG39500 | GNL1      | 426.8165 | 262.2842 | 283.284  | 174.0394 | 133.8184 | 228.2765 | 231.2189 | 263.2491 | 133.7457  | 266.7509 | 272.7185 | 254.833  | -0.82658  | 0.00197    | -0.60426 | 0.034363 | -0.28191 | 0.567267 |
| ATSG39510 | VT11      | 670.5418 | 781.4998 | 829.2494 | 962.578  | 1049.348 | 886.1915 | 976.4552 | 884.6897 | 1071.1918 | 805.0504 | 1057.616 | 825.6175 | 0.341716  | 0.033551   | 0.3581   | 0.730444 | 0.231746 | 0.374712 |
| ATSG39520 | ATSG39520 | 3.566712 | 17.84246 | 16.73951 | 98.97974 | 93.40789 | 103.6714 | 76.4801  | 74.44341 | 36.1211   | 8.635821 | 30.59768 | 6.215439 | 2.546855  | 1.09E-09   | 1.947067 | 0.020046 | 0.161285 | 0.882916 |
| ATSG39530 | ATSG39530 | 1549.142 | 1877.027 | 1892.852 | 978.6622 | 1086.446 | 894.1662 | 862.6244 | 755.223  | 725.3508  | 2494.793 | 2848.245 | 2218.912 | -0.83177  | 3.65E-09   | -1.16367 | 7.9E-17  | 0.500894 | 0.006113 |
| ATSG39532 | ATSG39532 | 0        | 0        | 0        | 0.412416 | 0        | 0        | 0        | 0        | 0         | 0        | 0        | 0        | 0.095918  | NA         | 0        | NA       | 0        | NA       |
| ATSG39533 | ATSG39533 | 0        | 0        | 0        | 0        | 0        | 0.996841 | 0        | 0        | 0         | 0        | 0        | 0        | 0.15625   | NA         | 0        | NA       | 0        | NA       |
| ATSG39535 | ATSG39535 | 2.377808 | 1.784246 | 0        | 0.412416 | 0.662467 | 0        | 0        | 0        | 0         | 1.919071 | 5.321336 | 1.035907 | -0.53487  | 0.424547   | -0.7313  | 0.256518 | 0.479475 | NA       |
| ATSG39540 | ATSG39540 | 0        | 0        | 0        | 0        | 0        | 0        | 0.889303 | 0        | 0         | 0        | 0        | 0        | 0.160764  | NA         | 0.160764 | NA       | 0        | NA       |
| ATSG39550 | ORTH1     | 78.46766 | 66.0171  | 63.09506 | 45.77813 | 56.97219 | 41.86731 | 29.34701 | 35.60337 | 37.09735  | 61.41028 | 79.82004 | 66.29802 | -0.49849  | 0.056217   | -0.98255 | 0.000248 | -0.01365 | 0.985847 |
| ATSG39560 | ATSG39560 | 0        | 0        | 0        | 0        | 0        | 0        | 0.889303 | 0        | 0         | 0        | 0        | 0        | 0.2071813 | NA         | 0.133076 | NA       | 0.29577  | NA       |
| ATSG39570 | ATSG39570 | 3031.705 | 2933.3   | 2678.321 | 2601.93  | 2249.739 | 2431.295 | 1871.095 | 2336.876 | 2754.966  | 2367.174 | 2232.3   | 2237.558 | -0.24316  | 0.126624   | -0.30759 | 0.055047 | -0.3331  | 0.125309 |
| ATSG39580 | PER62     | 0        | 1.784246 | 0        | 3.299325 | 3.974804 | 3.987363 | 4.446517 | 5.39445  | 2.928738  | 0        | 0        | 1.035907 | 1.171802  | 0.069882   | 1.265452 | 0.056116 | -0.13759 | NA       |
| ATSG39581 | ATSG39581 | 0        | 0        | 0        | 0        | 0        | 0        | 0        | 0        | 0         | 0        | 0        | 0        | #N/A      | #N/A       | #N/A     | #N/A     | #N/A     | #N/A     |
| ATSG39590 | ATSG39590 | 765.6541 | 840.3799 | 825.3864 | 759.2571 | 721.4269 | 878.2167 | 888.4142 | 910.5831 | 813.2129  | 712.935  | 601.311  | 641.2261 | -0.04488  | 0.787521   | 0.103629 | 0.517593 | -0.30723 | 0.100977 |
| ATSG39600 | ATSG39600 | 135.535  | 153.4452 | 164.8198 | 218.9927 | 244.4504 | 185.4124 | 200.9826 | 149.9657 | 267.4914  | 169.8378 | 220.8354 | 169.8887 | 0.502953  | 0.031851   | 0.433826 | 0.083013 | 0.290081 | 0.475669 |
| ATSG39610 | ATNA2C    | 58.25629 | 82.07532 | 61.80741 | 139.3965 | 158.9921 | 136.5672 | 189.4216 | 128.3879 | 96.64835  | 55.65307 | 66.5167  | 46.61579 | 1.068486  | 4.13E-05   | 1.002899 | 0.000187 | -0.23954 | 0.666695 |
| ATSG39620 | RABG1     | 0        | 0        | 0        | 0        | 0        | 0        | 0        | 0        | 0         | 0        | 1.330334 | 0        | 0         | NA         | 0        | NA       | 0.172362 | NA       |
| ATSG39630 | ATSG39630 | 0        | 0        | 0        | 0        | 0.662467 | 0        | 0        | 0        | 0         | 0        | 0        | 0        | 0.128567  | NA         | 0        | NA       | 0        | NA       |
| ATSG39635 | MIR169C   | 0        | 0        | 0        | 0        | 0        | 0        | 0        | 0        | 0         | 0        | 0        | 0        | #N/A      | #N/A       | #N/A     | #N/A     | #N/A     | #N/A     |
| ATSG39640 | ATSG39640 | 0        | 0        | 0        | 0        | 0        | 0        | 0        | 0        | 0         | 0        | 0        | 0        | #N/A      | #N/A       | #N/A     | #N/A     | #N/A     | #N/A     |
| ATSG39645 | ATSG39645 | 0        | 0        | 0        | 0        | 0        | 0        | 0        | 0        | 0         | 0        | 0        | 0        | #N/A      | #N/A       | #N/A     | #N/A     | #N/A     | #N/A     |
| ATSG39650 | ATSG39650 | 2.377808 | 1.784246 | 0        | 0        | 0        | 0        | 0        | 1.952492 | 0         | 0        | 0        | 0        | -0.65999  | NA         | -0.26113 | NA       | -0.60297 | NA       |
| ATSG39660 | CDF2      | 122.4571 | 114.1917 | 100.437  | 69.69823 | 71.54647 | 82.73778 | 68.47637 | 70.12785 | 61.5035   | 91.15588 | 87.80204 | 94.26749 | -0.58808  | 0.003425   | -0.73117 | 0.000526 | -0.29276 | 0.40268  |
| ATSG39670 | CM145     | 92.73451 | 133.8185 | 104.3    | 767.5054 | 921.492  | 783.5169 | 1115.187 | 936.4765 | 1394.079  | 64.28889 | 67.84703 | 111.8779 | 2.811582  | 3.84E-41   | 3.277191 | 7.32E-56 | -0.40274 | 0.313757 |
| ATSG39680 | EMB2744   | 19.02246 | 654.8183 | 15.45185 | 14.43455 | 23.84882 | 17.94313 | 23.12189 | 23.73558 | 9.76246   | 12.47396 | 11.97301 | 11.39497 | 0.28162   | 0.585437   | 0.297224 | 0.15313  | -0.26424 | 0.784082 |
| ATSG39690 | ANAC093   | 0        | 1.784246 | 0        | 0        | 0.662467 | 0        | 0.889303 | 0        | 0         | 0        | 1.330334 | 0        | -0.15521  | NA         | -0.09489 | NA       | -0.04759 | NA       |
| ATSG39693 | MIR869A   | 0        | 0        | 0        | 0        | 0        | 0        | 0        | 0        | 0         | 1.330334 | 0        | 0        | 0         | NA         | 0        | NA       | 0.172362 | NA       |
| ATSG39700 | MYB89     | 0        | 0        | 0        | 0        | 0        | 0        | 0        | 0        | 0         | 0        | 0        | 0        | #N/A      | #N/A       | #N/A     | #N/A     | #N/A     | #N/A     |
| ATSG39710 | EMB2745   | 126.0238 | 101.702  | 117.1765 | 97.33008 | 71.54647 | 102.6746 | 88.04104 | 71.20674 | 63.45599  | 93.07496 | 90.46271 | 101.5188 | -0.34512  | 0.142243   | -0.61331 | 0.009312 | -0.27185 | 0.498675 |
| ATSG39720 | AG12L     | 0        | 1.784246 | 0        | 24.33252 | 25.17376 | 13.95577 | 11.56095 | 6.47334  | 23.4299   | 0        | 0        | 0        | 2.947819  | 9.86E-08   | 2.377872 | 3.52E-05 | -0.34933 | NA       |
| ATSG39730 | ATSG39730 | 539.7624 | 654.8183 | 732.6753 | 838.0284 | 968.5272 | 765.5737 | 795.0373 | 676.644  | 1043.607  | 929.79   | 892.6541 | 907.4541 | 0.408749  | 0.030541   | 0.376669 | 0.057191 | 0.492073 | 0.048196 |
| ATSG39740 | RPL5B     | 2768.957 | 2901.184 | 3154.753 | 3484.499 | 3162.619 | 2808.1   | 2223.259 | 2296.957 | 2975.598  | 3134.803 | 3400.334 | 3204.599 | 0.098949  | 0.569151   | -0.23229 | 0.15313  | 0.140068 | 0.605576 |
| ATSG39750 | EMB3008   | 0        | 0        | 0        | 0        | 0        | 0        | 2.15778  | 0        | 0         | 0.959536 | 0        | 0        | 0         | NA         | 0.297647 | NA       | 0.144512 | NA       |
| ATSG39760 | ZHD10     | 93.92341 | 85.64381 | 68.24568 | 92.38109 | 78.17114 | 70.7757  | 72.03358 | 75.5223  | 84.9334   | 58.53167 | 73.16837 | 59.04667 | -0.01939  | 0.951359   | -0.08884 | 0.780989 | -0.37229 | 0.345021 |
| ATSG39770 | ATSG39770 | 0        | 1.784246 | 0        | 0        | 0        | 0        | 0        | 1.952492 | 0         | 0        | 0        | 0        | -0.26122  | NA         | 0.069655 | NA       | -0.23381 | NA       |
| ATSG39785 | ATSG39785 | 73.71204 | 51.74313 | 45.0679  | 105.9908 | 94.73282 | 128.5925 | 136.0634 | 138.0979 | 149.3656  | 45.09817 | 49.22236 | 50.75942 | 0.889586  | 0.00011    | 1.252225 | 2.92E-08 | -0.23924 | 0.626086 |
| ATSG39790 | ATSG39790 | 161.6909 | 155.2294 | 175.121  | 160.0172 | 184.1659 | 145.5388 | 226.7724 | 162.9124 | 190.368   | 254.2769 | 247.4421 | 221.684  | -0.00622  | 0.980565   | 0.232814 | 0.276735 | 0.540655 | 0.023592 |
| ATSG39800 | ATSG39800 | 63.01191 | 41.03766 | 72.10864 | 102.6915 | 103.3449 | 80.7441  | 80.03731 | 67.97007 | 93.71962  | 94.99403 | 81.15037 | 85.98024 | 0.660883  | 0.006775   | 0.412862 | 0.137481 | 0.527118 | 0.15726  |
| ATSG39810 | AGL98     | 0        | 0        | 0        | 0        | 0        | 0        | 0        | 0        | 0         | 0        | 0        | 0        | #N/A      | #N/A       | #N/A     | #N/A     | #N/A     | #N/A     |
| ATSG39820 | ANAC094   | 0        | 0        | 0        | 3.299325 | 3.974804 | 0        | 1.778607 | 1.07889  | 0.976246  | 0        | 1.330334 | 1.035907 | 1.059017  | 0.083042   | 0.564517 | 0.407641 | 0.329466 | 0.000000 |
| ATSG39830 | DEGP8     | 613.4744 | 701.2087 | 748.1272 | 566.2466 | 553.8226 | 538.294  | 694.546  | 705.594  | 611.13    | 844.3914 | 862.0564 | 832.8688 | -0.30881  | 0.012714   | -0.03474 | 0.893911 | 0.292667 | 0.0824   |
| ATSG39840 | ATSG39840 | 90.3567  | 87.42806 | 59.2321  | 55.6761  | 67.57166 | 53.8294  | 54.24751 | 81.99564 | 50.76479  | 69.08657 | 69.17737 | 73.54936 | -0.39541  | 0.15254    | -0.32893 | 0.27994  | -0.14926 | 0.789571 |
| ATSG39850 | RP59C     | 126.0238 | 119.5445 | 182.8469 | 189.7112 | 210.6646 | 170.4598 | 140.51   | 128.3879 | 190.368   | 151.6066 | 127.7121 | 139.8474 | 0.398282  | 0.081347   | 0.091182 | 0.760567 | 0.554044 | 0.925676 |
| ATSG39860 | PRE1      | 140.2907 | 201.6198 | 220.1889 | 61.86234 | 67.57166 | 35.86627 | 44.46517 | 35.60337 | 36.1211   | 244.6816 | 339.2352 | 251.7253 | -1.65736  | 7.19E-12   | -2.1438  | 3.47E-17 | 0.034078 | 0.122184 |
| ATSG39861 | ATSG39861 | 0        | 0        | 0        | 0        | 0        | 0        | 0        | 0        | 0         | 0.959536 | 0        | 0        | 0         | NA         | 0        | NA       | 0.17512  | NA       |
| ATSG39862 | ATSG39862 | 0        | 0        | 0        | 1.324935 | 0        | 0        | 0        | 0        | 0         | 0        | 1.035907 | 0        | 0.196444  | NA         | 0        | NA       | 0.145119 | NA       |
| ATSG39863 | ATSG39863 | 0        | 0        | 0        | 0        | 0        | 0        | 1.07889  | 0        | 0         | 0        | 0        | 0        | 0         | NA         | 0.16673  | NA       | 0        | NA       |
| ATSG39865 | ATSG39865 | 22.58917 | 17.84246 | 12.87654 | 8.248311 | 9.274542 | 3.987363 | 10.67164 | 9.710009 | 8.786214  | 17.27164 | 22.61568 | 13.46678 | -1.06786  | 0.017673   | -0.74096 | 0.137984 | -0.01047 | NA       |
| ATSG39870 | ATSG39870 | 0        | 0        | 0        | 0        | 0        | 0        | 0        | 0        | 0         | 0        | 0        | 0        | #N/A      | #N/A       | #N/A     | #N/A     | #N/A     | #N/A     |
| ATSG39880 | ATSG39880 | 0        | 0        | 0        | 0        | 0        | 0        | 0        | 0        | 0         | 0        | 0        | 0        | 0         | NA         | 0        | NA       | 0.172362 | NA       |
| ATSG39890 | PCO2      | 8.322328 | 5.352738 | 7.725926 | 4.536571 | 2.649869 | 2.990522 | 0.889303 | 4.31556  | 2.928738  | 5.757214 | 9.312338 | 5.179533 | -0.75067  | 0.22552    | -0.97641 | 0.130245 | -0.0864  | NA       |
| ATSG39895 | ATSG39895 | 0        | 0        | 0        | 0        | 0        | 0        | 0        | 0        | 0         | 0        | 0        | 0        | #N/A      | #N/A       | #N/A     | #N/A     | #N/A     | #N/A     |
| ATSG39900 | ATSG39900 | 90.3567  | 62.44861 | 69.53333 | 57.32576 | 56.97219 | 63.79781 | 63.14055 | 59.33895 | 60.52725  | 67.16749 | 58.53469 | 66.29802 | -0.33362  | 0.18019    | -0.28525 | 0.301822 | -0.21408 | 0.637513 |
| ATSG39910 | ATSG39910 | 0        | 0        | 0        | 0        | 0        | 0        | 0        | 0        | 0         | 0        | 0        | 0        | #N/A      | #N/A       | #N/A     | #N/A     | #N/A     | #N/A     |
| ATSG39920 | ATSG39920 | 0        | 0        | 0        | 0        | 0        | 0        | 0        | 0        | 0.976246  | 0        | 0        | 0        | 0         | NA         | 0.16673  | NA       | 0        | NA       |
| ATSG39930 | CLP55     | 0        | 0        | 0        | 0        | 0        | 0.889303 | 0        | 0        | 0         | 0        | 0        | 0        | 0         | NA         | 0.160764 | NA       | 0        | NA       |
| ATSG39940 | ATSG39940 | 107.0014 | 124.8972 | 140.3543 | 169.9152 | 166.9418 | 160.4914 | 136.9527 | 126.2301 | 130.817   | 113.2252 | 73.16837 | 142.9551 | 0.40968   | 0.074133   | 0.082012 | 0.789536 | -0.15582 | 0.739252 |
| ATSG39950 | TRX2      | 394.7161 | 476.3937 | 439.0901 | 1021.141 | 1138.781 | 852.2989 | 670.5348 | 614.9673 | 1127.564  | 489.3632 | 501.5359 | 399.8599 | 1.1634    | 5.71E-08   | 0.852815 | 0.00013  | 0.083779 | 0.874874 |
| ATSG39955 | ATSG39955 | 0        | 0        | 0        | 0        | 0        | 0        | 0        | 0        | 0         | 0        | 0        | 0        | #N/A      | #N/A       | #N/A     | #N/A     | #N/A     | #N/A     |
| ATSG39960 | ATSG39960 | 99.86793 | 82.07532 | 93.99877 | 72.17273 | 74.8588  | 83.73463 | 66.69776 | 88.46897 | 54.66978  | 71.00564 | 85.14137 | 82.87252 | -0.26664  | 0.290808</ |          |          |          |          |





|           |           |          |          |          |          |          |          |          |          |          |          |          |          |          |          |          |          |          |          |
|-----------|-----------|----------|----------|----------|----------|----------|----------|----------|----------|----------|----------|----------|----------|----------|----------|----------|----------|----------|----------|
| ATSG42100 | ATBG_PPAP | 507.662  | 315.8115 | 314.1877 | 200.0216 | 170.2541 | 208.3397 | 125.3918 | 181.2535 | 174.748  | 312.8086 | 395.1092 | 304.5565 | -0.9485  | 1.31E-05 | -1.20471 | 3.44E-08 | -0.16953 | 0.704747 |
| ATSG42110 | ATSG42110 | 42.80054 | 51.74313 | 57.94445 | 50.72712 | 51.67245 | 43.86099 | 28.45771 | 18.34113 | 47.83605 | 54.69353 | 57.20436 | 65.26211 | -0.04389 | 0.913943 | -0.63008 | 0.063049 | 0.208977 | 0.735214 |
| ATSG42120 | LECRKSG   | 0        | 0        | 0        | 0.824831 | 0        | 0        | 0.996841 | 0        | 0        | 1.952492 | 0        | 1.330334 | 0.276727 | NA       | 0.301563 | NA       | 0.4983   | NA       |
| ATSG42130 | MFL1      | 304.3594 | 265.8527 | 249.8049 | 194.6602 | 211.9895 | 207.3429 | 226.7724 | 249.2236 | 255.7765 | 248.5197 | 254.0938 | 257.9407 | -0.41847 | 0.004303 | -0.16637 | 0.341408 | -0.11049 | 0.711691 |
| ATSG42140 | ATSG42140 | 197.3581 | 173.0719 | 173.8333 | 166.2035 | 132.4935 | 177.4377 | 160.0746 | 213.6202 | 106.4108 | 120.9015 | 134.3637 | 162.6373 | -0.18938 | 0.505854 | -0.17845 | 0.557954 | -0.36776 | 0.367652 |
| ATSG42146 | ATSG42146 | 21.40027 | 19.62671 | 30.9037  | 16.90904 | 14.57428 | 7.974726 | 16.00746 | 8.63112  | 8.786214 | 24.94793 | 43.90102 | 16.5745  | -0.71511 | 0.116538 | -0.93167 | 0.050781 | 0.19514  | 0.838751 |
| ATSG42150 | ATSG42150 | 111.757  | 135.6027 | 119.7519 | 189.7112 | 188.1407 | 165.4756 | 177.8607 | 166.1491 | 209.8929 | 106.5085 | 105.0964 | 136.7397 | 0.567351 | 0.002596 | 0.589096 | 0.002452 | -0.06195 | 0.896002 |
| ATSG42170 | ATSG42170 | 0        | 0        | 0        | 0        | 0        | 0        | 0        | 0        | 0        | 0        | 0        | 0        | #N/A     | #N/A     | #N/A     | #N/A     | #N/A     | #N/A     |
| ATSG42180 | PER64     | 0        | 1.784246 | 2.575309 | 0        | 1.324935 | 0        | 0.889303 | 1.07889  | 0        | 0.959536 | 1.330334 | 0        | -0.44796 | 0.487059 | -0.30812 | 0.658057 | -0.26356 | NA       |
| ATSG42190 | SKP1B     | 741.8761 | 852.8696 | 827.9616 | 876.4808 | 786.3487 | 714.7348 | 775.4276 | 725.014  | 978.1985 | 917.3161 | 997.7505 | 847.3715 | -0.0534  | 0.781108 | 0.034341 | 0.871047 | 0.187168 | 0.475332 |
| ATSG42200 | ATL23     | 28.53369 | 21.41095 | 21.89012 | 28.45667 | 29.81103 | 34.88943 | 37.35075 | 48.55005 | 73.21845 | 24.94793 | 21.28534 | 32.1131  | 0.309717 | 0.442629 | 0.034341 | 0.871047 | 0.105222 | 0.903758 |
| ATSG42203 | ATSG42203 | 0        | 0        | 0        | 0        | 0        | 0        | 0        | 0        | 0        | 0        | 0        | 0        | #N/A     | #N/A     | #N/A     | #N/A     | #N/A     | #N/A     |
| ATSG42210 | ATSG42210 | 22.58917 | 16.05821 | 16.73951 | 9.073143 | 6.624673 | 14.95261 | 8.003731 | 11.86779 | 8.786214 | 19.19071 | 7.982004 | 22.78994 | -0.78111 | 0.097942 | -0.81548 | 0.107942 | -0.10916 | NA       |
| ATSG42220 | ATSG42220 | 519.551  | 415.7293 | 454.542  | 355.9146 | 275.5864 | 315.0017 | 331.7102 | 391.637  | 260.6577 | 415.4789 | 401.7609 | 427.8294 | -0.54331 | 0.002079 | -0.49241 | 0.00746  | -0.15803 | 0.642243 |
| ATSG42223 | ATSG42223 | 0        | 0        | 0        | 0        | 1.987402 | 0        | 0        | 0        | 0        | 0        | 0        | 0        | 0.260054 | NA       | 0        | NA       | 0        | NA       |
| ATSG42230 | SCPL41    | 4.755616 | 7.136984 | 2.575309 | 1.649662 | 0        | 0.996841 | 2.66791  | 0        | 1.952492 | 4.797678 | 0        | 1.035907 | -1.11374 | 0.090971 | -0.79487 | 0.268348 | -0.62859 | NA       |
| ATSG42232 | ATSG42232 | 0        | 0        | 0        | 0        | 0        | 0        | 2.66791  | 0        | 0        | 0        | 0        | 0        | 0        | 0        | 0.335767 | NA       | 0        | NA       |
| ATSG42235 | ATSG42235 | 3.566712 | 0        | 0        | 0.824831 | 0.662467 | 0        | 0.889303 | 2.15778  | 2.928738 | 0        | 1.330334 | 0        | -0.36511 | 0.599095 | 0.271515 | 0.722283 | -0.40148 | NA       |
| ATSG42240 | SCPL42    | 323.3819 | 394.3184 | 330.9272 | 441.6971 | 401.4552 | 393.7521 | 376.1754 | 379.7693 | 349.4961 | 343.5138 | 388.4575 | 373.9623 | 0.24706  | 0.086813 | 0.08263  | 0.647018 | 0.08099  | 0.786163 |
| ATSG42242 | LCR57     | 0        | 0        | 0        | 0        | 0        | 0        | 0        | 0        | 0.959536 | 0        | 0        | 0        | 0        | 0        | 0        | NA       | 0        | NA       |
| ATSG42250 | ATSG42250 | 432.761  | 524.5683 | 494.4593 | 453.2447 | 493.5381 | 451.5689 | 282.7985 | 294.537  | 244.0615 | 427.9529 | 477.5899 | 387.429  | -0.04878 | 0.791744 | -0.80629 | 1.22E-08 | -0.16359 | 0.536921 |
| ATSG42260 | BGLU12    | 0        | 0        | 0        | 0.412416 | 0        | 0        | 0        | 0        | 0        | 0        | 0        | 0        | 0.095918 | NA       | 0        | NA       | 0        | NA       |
| ATSG42265 | ATSG42265 | 0        | 1.784246 | 0        | 0        | 0        | 0        | 0        | 0        | 0        | 0        | 0        | 0        | -0.2184  | NA       | -0.20558 | NA       | -0.19918 | NA       |
| ATSG42270 | FTSH5     | 4207.531 | 3518.533 | 3092.946 | 1592.337 | 1672.067 | 1660.737 | 2273.949 | 2510.577 | 2694.439 | 3775.773 | 4472.583 | 3485.825 | -1.11925 | 8.94E-16 | -0.5253  | 0.000417 | 0.114798 | 0.698043 |
| ATSG42280 | ATSG42280 | 48.74506 | 35.68492 | 41.20494 | 14.02213 | 9.937009 | 17.94313 | 9.782338 | 10.7889  | 10.73871 | 39.34096 | 42.57069 | 42.47211 | -1.5031  | 2.92E-06 | -1.8184  | 2.44E-07 | -0.02339 | 0.979828 |
| ATSG42290 | ATSG42290 | 0        | 0        | 0        | 0.824831 | 1.987402 | 0        | 0.889303 | 0        | 0.928738 | 0.959536 | 1.330334 | 0        | 0.464814 | NA       | 0.581706 | NA       | 0.340568 | NA       |
| ATSG42300 | UBL5      | 796.5656 | 979.5511 | 1062.315 | 221.785  | 2045.699 | 1682.667 | 1269.036 | 1477     | 1915.395 | 943.2235 | 755.6297 | 939.5672 | 1.041785 | 7.99E-09 | 0.698986 | 0.000219 | -0.10109 | 0.808008 |
| ATSG42310 | ATSG42310 | 584.9407 | 519.2156 | 457.1173 | 292.4026 | 337.1958 | 317.9922 | 485.5597 | 491.9738 | 459.8119 | 362.7045 | 381.8058 | 405.0395 | -0.71552 | 6.53E-08 | -0.11889 | 0.484385 | -0.4374  | 0.015025 |
| ATSG42320 | ATSG42320 | 184.2801 | 146.3082 | 168.6827 | 235.9017 | 249.0877 | 248.2134 | 248.1157 | 235.198  | 205.0117 | 197.6643 | 159.6401 | 170.9246 | 0.532441 | 0.001183 | 0.445107 | 0.01101  | 0.074971 | 0.850918 |
| ATSG42323 | ATSG42323 | 0        | 0        | 0        | 0.412416 | 0        | 0        | 0        | 0        | 0        | 0        | 0        | 0        | 0.095918 | NA       | 0        | NA       | 0        | NA       |
| ATSG42325 | ATSG42325 | 1.188904 | 0        | 0        | 0.412416 | 0.662467 | 1.993682 | 0        | 1.07889  | 0        | 0        | 0        | 0        | 0.299637 | NA       | -0.05523 | 0.01101  | -0.25681 | NA       |
| ATSG42330 | ATSG42330 | 16.64466 | 8.92123  | 20.60247 | 21.03319 | 19.87402 | 16.94629 | 22.23259 | 16.18335 | 31.23987 | 18.23118 | 18.62468 | 26.93357 | 0.258543 | 0.588468 | 0.49017  | 0.294614 | 0.374067 | 0.627115 |
| ATSG42340 | PUB15     | 2.377808 | 0        | 0        | 1.287654 | 0        | 0        | 0.889303 | 0        | 0        | 0        | 0        | 0        | -0.65934 | NA       | -0.42663 | NA       | -0.60792 | NA       |
| ATSG42350 | ATSG42350 | 104.6235 | 101.702  | 137.779  | 104.7536 | 111.957  | 110.6493 | 105.8271 | 119.7568 | 109.3396 | 106.5085 | 87.80204 | 99.44703 | -0.07996 | 0.747266 | -0.04668 | 0.868628 | -0.22172 | 0.551888 |
| ATSG42360 | ATSG42360 | 115.3237 | 115.976  | 126.1901 | 122.075  | 118.5816 | 132.5798 | 103.1592 | 131.6246 | 112.2683 | 110.3466 | 98.44471 | 136.7397 | 0.054762 | 0.830718 | -0.04721 | 0.867868 | -0.04279 | 0.934072 |
| ATSG42370 | ATSG42370 | 28.53369 | 46.3904  | 42.49259 | 29.28151 | 21.86142 | 43.86099 | 46.24378 | 23.73558 | 29.28738 | 36.46235 | 25.27635 | 42.47217 | -0.2886  | 0.488945 | -0.19579 | 0.6763   | -0.13028 | 0.878205 |
| ATSG42380 | CML37     | 7.133424 | 3.568492 | 2.575309 | 42.06639 | 38.4231  | 46.85152 | 52.46891 | 56.10228 | 91.76712 | 0.959536 | 1.330334 | 4.143626 | 2.638243 | 4.7E-10  | 3.254707 | 6.5E-15  | -0.60999 | 0.53053  |
| ATSG42390 | ATSG42390 | 2349.274 | 1807.441 | 1793.702 | 1012.893 | 858.5576 | 1260.007 | 1619.422 | 1916.109 | 1154.899 | 1992.955 | 2042.063 | 1922.643 | -0.90253 | 4.48E-06 | -0.33466 | 0.140624 | 0.001095 | 0.998144 |
| ATSG42400 | ATXR7     | 309.115  | 315.8115 | 253.6679 | 178.5759 | 129.1811 | 254.1944 | 275.6841 | 148.3894 | 274.4272 | 243.4511 | 257.9407 | 0        | -0.62012 | 0.022572 | -0.3064  | 0.329667 | -0.16879 | 0.716421 |
| ATSG42405 | ATSG42405 | 0        | 0        | 0        | 0        | 0        | 0        | 1.07889  | 0        | 0        | 0        | 0        | 0        | 0        | 0        | 0.16673  | NA       | 0        | NA       |
| ATSG42410 | ATSG42410 | 1.188904 | 0        | 0        | 0        | 0        | 0        | 0.889303 | 0        | 0        | 0        | 0        | 0        | -0.20902 | NA       | -0.03919 | NA       | -0.19148 | NA       |
| ATSG42420 | ATSG42420 | 316.2484 | 346.1437 | 348.9543 | 378.1851 | 459.0898 | 426.6479 | 552.2575 | 485.5005 | 408.0708 | 333.9184 | 343.2262 | 369.8186 | 0.31534  | 0.053874 | 0.509885 | 0.001335 | 0.050698 | 0.894168 |
| ATSG42430 | ATSG42430 | 0        | 0        | 0        | 1.324935 | 0        | 0.889303 | 0        | 0        | 0        | 0        | 0        | 0        | 0.194769 | NA       | 0.126571 | NA       | 0.05677  | NA       |
| ATSG42440 | ATSG42440 | 39.23383 | 46.3904  | 50.21852 | 147.6448 | 110.632  | 128.5925 | 80.03731 | 113.2834 | 99.57709 | 32.62421 | 21.28534 | 22.78994 | 1.459476 | 2.34E-09 | 1.05777  | 0.000047 | -0.74047 | 0.079514 |
| ATSG42445 | ATSG42445 | 0        | 3.568492 | 2.575309 | 2.062078 | 1.987402 | 1.993682 | 3.557214 | 1.07889  | 2.928738 | 0.959536 | 0        | 1.035907 | 0.057308 | 0.947998 | 0.233397 | 0.78301  | -0.50162 | NA       |
| ATSG42450 | PCMP-E102 | 5.94452  | 14.27397 | 15.45185 | 19.38353 | 13.24935 | 18.93997 | 21.34328 | 16.18335 | 15.52492 | 15.32527 | 13.30334 | 16.64632 | 0.481942 | 0.306921 | 0.612904 | 0.209555 | 0.375509 | NA       |
| ATSG42460 | ATSG42460 | 53.50068 | 69.5856  | 63.09506 | 118.7757 | 132.4935 | 104.6683 | 59.58333 | 49.62894 | 64.43224 | 47.97678 | 50.55269 | 48.68761 | 0.928362 | 2.47E-05 | -0.08061 | 0.811671 | -0.31352 | 0.481833 |
| ATSG42470 | ATSG42470 | 186.6579 | 169.5034 | 180.2716 | 185.587  | 210.0021 | 230.2702 | 171.6352 | 144.4844 | 202.462  | 192.8984 | 166.781  | 0        | 0.205166 | 0.279985 | -0.13584 | 0.536429 | 0.062011 | 0.879935 |
| ATSG42480 | ARC6      | 423.2498 | 403.2396 | 368.2691 | 201.6712 | 207.3523 | 227.2797 | 285.4664 | 257.8547 | 256.7527 | 318.5658 | 304.6465 | 357.3878 | -0.90409 | 8.6E-12  | -0.56953 | 0.000046 | -0.27914 | 0.199712 |
| ATSG42490 | ATSG42490 | 2.377808 | 1.784246 | 0        | 0        | 0.662467 | 0.996841 | 2.66791  | 4.31556  | 1.952492 | 0        | 1.330334 | 0        | -0.49631 | 0.478243 | 0.574855 | 0.428896 | -0.46658 | NA       |
| ATSG42500 | DIR2      | 1.188904 | 0        | 0        | 2.062078 | 0        | 1.324935 | 0        | 1.778607 | 0        | 0        | 1.330334 | 1.035907 | 0.356014 | NA       | 0.069611 | NA       | 0.134154 | NA       |
| ATSG42504 | ATSG42504 | 0        | 0        | 0        | 0        | 0        | 0        | 0        | 0        | 0        | 0        | 0        | 0        | #N/A     | #N/A     | #N/A     | #N/A     | #N/A     | #N/A     |
| ATSG42505 | ATSG42505 | 0        | 0        | 0        | 0        | 0        | 0        | 0        | 0        | 0        | 0        | 0        | 0        | #N/A     | #N/A     | #N/A     | #N/A     | #N/A     | #N/A     |
| ATSG42510 | DIR1      | 0        | 0        | 0        | 0.662467 | 0.996841 | 0        | 0        | 0.976246 | 0        | 0        | 0        | 0        | 0.275104 | NA       | 0.163472 | NA       | 0        | NA       |
| ATSG42520 | BPC6      | 452.9724 | 563.8217 | 543.3901 | 581.506  | 530.6363 | 612.0602 | 589.6082 | 636.5451 | 501.7904 | 541.1781 | 556.0796 | 477.5529 | 0.144522 | 0.396766 | 0.148218 | 0.411063 | 0.015799 | 0.970574 |
| ATSG42530 | ATSG42530 | 3772.392 | 3208.074 | 3727.759 | 9645.575 | 9418.96  | 5378.953 | 5032.568 | 3720.013 | 11036.46 | 2477.521 | 4323.585 | 4287.617 | 1.       |          |          |          |          |          |



|           |           |           |          |           |          |          |          |           |          |          |          |          |          |          |           |          |          |          |          |
|-----------|-----------|-----------|----------|-----------|----------|----------|----------|-----------|----------|----------|----------|----------|----------|----------|-----------|----------|----------|----------|----------|
| ATSG43700 | IAA4      | 632.4969  | 715.4827 | 731.3877  | 549.3375 | 798.2731 | 681.8391 | 759.4652  | 603.0995 | 933.2912 | 544.0567 | 526.8123 | 796.6121 | -0.03465 | 0.906484  | 0.139552 | 0.614159 | -0.1487  | 0.739037 |
| ATSG43710 | MNS4      | 170.0133  | 124.8972 | 151.9432  | 157.5427 | 131.1685 | 182.4219 | 164.5211  | 188.8057 | 107.3871 | 122.8206 | 105.0964 | 168.8528 | 0.062455 | 0.849999  | 0.034141 | 0.925601 | -0.16627 | 0.754396 |
| ATSG43720 | ATSG43720 | 236.5919  | 223.0308 | 191.8605  | 214.0437 | 230.5386 | 216.3144 | 192.0896  | 186.648  | 181.5818 | 223.5718 | 195.5591 | 218.5763 | 0.020556 | 0.921979  | -0.21316 | 0.237222 | -0.02564 | 0.951328 |
| ATSG43725 | ATSG43725 | 11.88904  | 24.97944 | 21.89012  | 16.08421 | 17.88662 | 17.94313 | 20.45398  | 18.34113 | 18.54867 | 31.66468 | 18.62468 | 30.04129 | -0.14277 | 0.770222  | 0.000889 | 0.99884  | 0.458675 | 0.499192 |
| ATSG43730 | ATSG43730 | 89.1678   | 108.839  | 87.5605   | 68.46099 | 51.67245 | 69.77885 | 104.80485 | 92.78453 | 48.8123  | 59.79171 | 93.12338 | 98.41112 | -0.55405 | 0.046388  | -0.19731 | 0.558273 | 0.037298 | 0.959593 |
| ATSG43740 | ATSG43740 | 347.16    | 349.7122 | 325.7165  | 206.6202 | 227.2263 | 278.1186 | 290.8022  | 264.328  | 270.4201 | 265.7914 | 343.2262 | 308.7001 | -0.52435 | 0.001155  | -0.30148 | 0.093733 | -0.15691 | 0.611698 |
| ATSG43745 | ATSG43745 | 344.7821  | 308.6746 | 318.0506  | 179.4008 | 168.2667 | 225.286  | 285.664   | 278.3536 | 176.7005 | 353.1091 | 344.5565 | 394.6804 | -0.75127 | 0.000113  | -0.383   | 0.077867 | 0.164231 | 0.670936 |
| ATSG43750 | PNS85     | 776.3543  | 918.8867 | 9783.0296 | 413.2404 | 429.9413 | 441.6005 | 629.6269  | 704.5151 | 880.5739 | 1139.928 | 1023.027 | 1086.666 | -0.98449 | 1.001123  | -0.20907 | 0.216194 | 0.337597 | 0.111518 |
| ATSG43755 | ATSG43755 | 0         | 0        | 0         | 0        | 0        | 0        | 0.889303  | 0        | 0        | 0        | 0        | 0        | 0        | NA        | 0        | NA       | 0        | NA       |
| ATSG43760 | KCS19     | 741.8761  | 719.0512 | 592.321   | 604.1888 | 664.4547 | 759.5927 | 612.7301  | 715.304  | 698.0159 | 642.8889 | 659.8456 | 587.359  | -0.02054 | 0.918648  | -0.0189  | 0.929105 | -0.11762 | 0.686445 |
| ATSG43770 | ATSG43770 | 0         | 0        | 0         | 0        | 0        | 0        | 1.778607  | 0        | 0        | 0        | 0        | 0        | 0        | NA        | 0        | NA       | 0        | NA       |
| ATSG43780 | AP54      | 312.6817  | 331.8698 | 281.9963  | 522.1181 | 520.0368 | 554.2435 | 486.449   | 570.7328 | 583.7951 | 261.9532 | 231.4781 | 228.9353 | 0.777502 | 0.409E-09 | 0.816977 | 9.35E-10 | -0.34725 | 0.102486 |
| ATSG43790 | PCMP-E30  | 52.31177  | 76.72258 | 55.36914  | 62.27475 | 49.68505 | 53.8294  | 65.80846  | 81.99564 | 59.55101 | 73.88424 | 67.84703 | 53.86714 | -0.11661 | 0.719819  | 0.179112 | 0.585715 | 0.102179 | 0.866988 |
| ATSG43800 | ATSG43800 | 1.188904  | 0        | 0         | 0        | 0        | 0        | 3.57214   | 0        | 0.976246 | 0.959536 | 1.330334 | 1.035907 | -0.38056 | NA        | 0.516777 | NA       | 0.308918 | NA       |
| ATSG43810 | AGO10     | 483.8839  | 454.9827 | 417.2     | 373.6485 | 297.4478 | 411.6952 | 428.6443  | 455.2916 | 307.5175 | 419.3171 | 392.4485 | 418.5062 | -0.32034 | 0.095508  | -0.30735 | 0.403312 | -0.1367  | 0.709599 |
| ATSG43820 | ATSG43820 | 22.58917  | 10.70548 | 21.89012  | 20.62078 | 17.22415 | 27.91154 | 26.6791   | 24.81447 | 16.59618 | 33.58375 | 31.92802 | 34.18492 | 0.153909 | 0.743145  | 0.228345 | 0.638712 | 0.734537 | 0.192105 |
| ATSG43822 | ATSG43822 | 34.47821  | 32.11643 | 48.93086  | 68.8734  | 60.28452 | 56.81992 | 37.35075  | 44.23449 | 38.07359 | 23.02886 | 45.23135 | 40.40035 | 0.650513 | 0.030822  | 0.031827 | 0.94306  | -0.11401 | 0.87702  |
| ATSG43830 | ATSG43830 | 1558.6535 | 1807.441 | 1735.758  | 1684.305 | 1542.224 | 1580.989 | 1219.235  | 1444.634 | 1634.236 | 1794.332 | 1819.897 | 1542.465 | -0.08321 | 0.6251    | -0.24361 | 0.115812 | 0.015859 | 0.967164 |
| ATSG43840 | HSFA6A    | 0         | 3.568492 | 0         | 0        | 0.662467 | 0.996841 | 3.57214   | 1.07889  | 1.952492 | 0        | 2.660668 | 3.10772  | -0.32609 | 0.654894  | 0.433219 | 0.558496 | 0.307835 | NA       |
| ATSG43850 | ARD4      | 435.1388  | 512.0786 | 473.8568  | 567.4838 | 457.7649 | 434.6226 | 359.2786  | 359.2703 | 420.762  | 599.7098 | 514.8392 | 601.8671 | 0.047045 | 0.817734  | -0.31041 | 0.070619 | 0.273288 | 0.273288 |
| ATSG43860 | CLH2      | 45.17835  | 55.31163 | 68.62963  | 84.54519 | 84.79581 | 55.82308 | 74.70149  | 65.81229 | 89.81463 | 36.46235 | 38.57969 | 34.18492 | 0.696997 | 0.010802  | 0.709085 | 0.013002 | -0.31602 | 0.559895 |
| ATSG43870 | ATSG43870 | 189.0357  | 248.0102 | 229.2025  | 223.5292 | 185.4908 | 212.3271 | 183.4113  | 185.4867 | 233.1627 | 288.6825 | 236.1867 |          | -0.08873 | 0.67783   | -0.30776 | 0.11511  | 0.185619 | 0.516641 |
| ATSG43880 | ATSG43880 | 323.3819  | 385.3971 | 275.558   | 164.1414 | 153.0299 | 186.4092 | 199.204   | 207.1469 | 152.2944 | 272.5081 | 262.0758 | 347.0287 | -0.94257 | 3.64E-07  | -0.79163 | 3.74E-05 | -0.14754 | 0.700472 |
| ATSG43890 | YUC5      | 0         | 0        | 1.287564  | 2.062078 | 0        | 1.993682 | 0.889303  | 4.31556  | 0.976246 | 0        | 2.660668 | 0        | 0.356468 | 0.607178  | 0.574442 | 0.39832  | 0.128729 | NA       |
| ATSG43900 | XI-2      | 1098.547  | 992.0408 | 844.7012  | 754.3081 | 761.8374 | 981.8882 | 835.056   | 898.7153 | 628.7024 | 841.5127 | 851.4137 | 858.7665 | -0.23086 | 0.227745  | -0.30736 | 0.110492 | -0.19816 | 0.53053  |
| ATSG43910 | ATSG43910 | 35.66712  | 39.25341 | 46.35556  | 207.0326 | 153.0299 | 158.4977 | 183.1965  | 168.3068 | 148.3894 | 41.26003 | 46.56169 | 31.0772  | 2.016315 | 3.5E-18   | 1.954712 | 9.44E-17 | -0.04414 | 0.953343 |
| ATSG43920 | ATSG43920 | 326.9486  | 283.6951 | 301.3111  | 222.292  | 219.9391 | 268.1502 | 302.3632  | 299.9314 | 239.1803 | 275.3867 | 242.1208 | 293.1615 | -0.36554 | 0.029945  | -0.17325 | 0.570939 | -0.16704 | 0.950128 |
| ATSG43930 | ATSG43930 | 206.8693  | 205.1883 | 222.7642  | 203.3209 | 206.6898 | 207.3429 | 228.551   | 233.0402 | 154.2469 | 137.2136 | 196.8894 | 171.9605 | -0.04062 | 0.876748  | -0.04394 | 0.875924 | -0.32641 | 0.31558  |
| ATSG43935 | FLS6      | 0         | 3.568492 | 0         | 0.412416 | 1.324935 | 0.996841 | 1.778607  | 0        | 0.995936 | 0        | 1.035907 | 0        | -0.04918 | 0.949512  | -0.1781  | 0.810481 | -0.13768 | NA       |
| ATSG43940 | ADH2      | 2669.089  | 2622.842 | 2589.473  | 3121.986 | 3004.289 | 2893.829 | 2628.781  | 2795.404 | 3099.581 | 2768.26  | 2788.38  | 2353.58  | 0.193522 | 0.106575  | 0.111924 | 0.411235 | 0.004836 | 0.988816 |
| ATSG43950 | ATSG43950 | 108.1903  | 92.78079 | 104.3     | 45.77813 | 47.69764 | 49.84204 | 53.57214  | 39.91893 | 41.97858 | 114.2847 | 122.3907 | 89.0796  | -1.06923 | 6.38E-07  | -1.3326  | 6.32E-09 | 0.080606 | 0.874312 |
| ATSG43960 | ATSG43960 | 527.8734  | 415.7293 | 448.1037  | 416.5397 | 410.7297 | 453.5626 | 415.3074  | 494.1316 | 412.9521 | 420.2766 | 437.6799 | 430.9371 | -0.12625 | 0.439241  | -0.07968 | 0.665575 | -0.11523 | 0.682185 |
| ATSG43970 | TOM5-2    | 222.325   | 262.2842 | 288.4346  | 345.6043 | 308.0473 | 256.1881 | 265.9017  | 197.4369 | 373.9022 | 293.6179 | 227.4871 | 266.228  | 0.232443 | 0.374247  | 0.113446 | 0.710528 | 0.029162 | 0.963009 |
| ATSG43980 | CRSP56    | 15.45575  | 10.70548 | 19.31482  | 24.33252 | 13.91181 | 15.94945 | 16.89677  | 15.04463 | 33.19236 | 22.06932 | 15.96401 | 22.78994 | 0.217458 | 0.677848  | 0.426985 | 0.405186 | 0.346941 | 0.683412 |
| ATSG43990 | SUVR2     | 148.613   | 146.3082 | 130.0531  | 86.60727 | 76.8462  | 88.71883 | 71.14428  | 77.68008 | 46.85981 | 130.4968 | 137.0244 | 126.3806 | -0.73257 | 0.00024   | -1.08483 | 1.62E-07 | -0.10641 | 0.81058  |
| ATSG44000 | ATSG44000 | 265.1256  | 233.7362 | 266.5444  | 220.2299 | 235.1759 | 238.2449 | 298.806   | 241.6713 | 270.4201 | 267.7014 | 274.0488 | 276.587  | -0.1501  | 0.367853  | 0.079334 | 0.681539 | 0.088983 | 0.778754 |
| ATSG44005 | ATSG44005 | 27.34479  | 26.76369 | 18.02716  | 33.40566 | 37.09817 | 30.90206 | 51.5796   | 33.44559 | 102.5058 | 16.31211 | 31.92802 | 39.36445 | 0.428165 | 0.353559  | 1.225828 | 0.002811 | 0.23358  | 0.979386 |
| ATSG44010 | ATSG44010 | 35.66712  | 62.44861 | 52.79383  | 50.3147  | 58.29712 | 59.81045 | 76.4801   | 55.02339 | 78.09968 | 81.56053 | 58.53469 | 78.7289  | 0.160437 | 0.627074  | 0.477885 | 0.113032 | 0.542058 | 0.194948 |
| ATSG44020 | ATSG44020 | 2000.925  | 2271.345 | 2207.04   | 1633.991 | 1688.629 | 2007.637 | 1629.204  | 1992.71  | 2646.603 | 2501.509 | 3021.188 | 2528.648 | -0.27609 | 0.157886  | -0.04649 | 0.855229 | 0.306666 | 0.288581 |
| ATSG44030 | CESA4     | 217.5694  | 117.7602 | 146.7926  | 56.08852 | 54.98478 | 70.7757  | 62.25423  | 61.49673 | 55.64602 | 63.12111 | 122.3907 | 118.0933 | -1.37354 | 7.38E-09  | -1.37529 | 2.11E-08 | -0.25441 | 0.575395 |
| ATSG44040 | ATSG44040 | 179.5245  | 112.4075 | 149.3679  | 105.166  | 125.8688 | 124.6051 | 123.7035  | 119.102  | 163.1211 | 192.0378 | 176.1041 |          | -0.3292  | 0.11617   | -0.2553  | 0.217169 | 0.236538 | 0.501624 |
| ATSG44050 | ATSG44050 | 42.80054  | 35.68492 | 37.34198  | 16.08421 | 15.23675 | 14.95261 | 21.34328  | 17.26224 | 17.57243 | 72.92471 | 119.7301 | 64.2262  | -1.21493 | 0.000248  | -0.95339 | 0.007559 | 1.07247  | 0.005165 |
| ATSG44060 | ATSG44060 | 105.8125  | 99.91778 | 82.40988  | 64.74925 | 82.80841 | 91.70935 | 64.02985  | 88.46897 | 126.912  | 88.27728 | 79.82004 | 54.90305 | -0.26509 | 0.410663  | -0.04292 | 0.91465  | -0.34889 | 0.492524 |
| ATSG44065 | ATSG44065 | 0         | 1.784246 | 1.287564  | 0.412416 | 0        | 0.996841 | 0         | 1.952492 | 0        | 1.035907 | 0        | 0        | -0.25065 | NA        | -0.12477 | NA       | -0.27658 | NA       |
| ATSG44070 | PCS1      | 580.1851  | 679.7977 | 593.6087  | 1081.354 | 1073.859 | 1199.139 | 908.8682  | 940.792  | 863.9777 | 468.2534 | 436.3495 | 473.4093 | 0.851295 | 6.34E-15  | 0.594909 | 1.66E-06 | -0.41685 | 0.006135 |
| ATSG44080 | ATSG44080 | 194.9802  | 176.6404 | 200.8741  | 251.5735 | 235.8383 | 210.3334 | 210.3334  | 200.9891 | 333.8711 | 221.6527 | 175.6041 | 155.386  | 0.276268 | 0.278453  | 0.335563 | 0.199538 | -0.04973 | 0.933388 |
| ATSG44090 | B"ALPHA   | 508.8509  | 520.9998 | 466.1309  | 539.4396 | 495.5255 | 522.3446 | 601.1692  | 585.8372 | 404.1658 | 481.6869 | 502.8662 | 444.4039 | 0.058551 | 0.783201  | 0.088595 | 0.68159  | -0.06478 | 0.866496 |
| ATSG44100 | abc1      | 617.0411  | 692.2875 | 724.9494  | 685.8471 | 659.1549 | 724.7032 | 680.3172  | 693.7262 | 584.7714 | 612.1837 | 498.8752 | 673.3392 | 0.024654 | 0.901921  | -0.05286 | 0.794626 | -0.1823  | 0.48767  |
| ATSG44110 | CKI7      | 82.03437  | 73.15409 | 75.97161  | 101.0418 | 108.6446 | 95.69671 | 72.92289  | 69.04896 | 98.54746 | 81.56053 | 103.766  | 78.7289  | 0.388783 | 0.083622  | -0.20286 | 0.464057 | 0.169411 | 0.703509 |
| ATSG44120 | CRA1      | 1.188904  | 0        | 1.287564  | 0        | 0        | 0        | 1.778607  | 3.23667  | 0        | 0        | 0        | 0        | -0.54393 | NA        | 0.35441  | NA       | -0.45845 | NA       |
| ATSG44130 | FLA13     | 357.8601  |          |           |          |          |          |           |          |          |          |          |          |          |           |          |          |          |          |



|           |           |          |           |          |          |          |          |          |          |          |          |          |          |          |          |          |          |           |          |
|-----------|-----------|----------|-----------|----------|----------|----------|----------|----------|----------|----------|----------|----------|----------|----------|----------|----------|----------|-----------|----------|
| ATSG44540 | ATSG44540 | 4.755616 | 23.1952   | 12.87654 | 2.062078 | 1.324935 | 0        | 0.889303 | 0        | 0.976246 | 20.15025 | 11.97301 | 7.251346 | -2.16153 | 0.000159 | -2.32648 | 7.75E-05 | 0.033688  | NA       |
| ATSG44550 | ATSG44550 | 9.511232 | 16.05821  | 7.725926 | 14.43455 | 14.57428 | 8.971567 | 5.335821 | 5.39445  | 11.71495 | 11.51443 | 7.982004 | 8.287252 | 0.235655 | 0.688066 | -0.41882 | 0.494026 | -0.16282  | NA       |
| ATSG44555 | ATSG44555 | 0        | 0         | 0        | 0        | 0        | 0        | 0        | 0        | 0        | 0        | 0        | 0        | #N/A     | #N/A     | #N/A     | #N/A     | #N/A      | #N/A     |
| ATSG44560 | VPS2.2    | 39.23383 | 32.11643  | 29.61605 | 57.73818 | 43.72284 | 57.81677 | 31.12562 | 46.39227 | 46.85981 | 57.57214 | 26.60668 | 49.72351 | 0.604321 | 0.070636 | 0.262632 | 0.518775 | 0.388603  | 0.509742 |
| ATSG44562 | ATSG44562 | 2.377808 | 3.568492  | 0        | 1.649662 | 1.987402 | 0        | 0        | 0        | 1.952492 | 0        | 1.330334 | 2.071813 | -0.18672 | 0.808384 | -0.46747 | 0.512449 | -0.26346  | NA       |
| ATSG44565 | ATSG44565 | 10.07794 | 7.136984  | 10.30123 | 45.77813 | 47.69764 | 40.87047 | 49.80099 | 24.81447 | 50.76479 | 14.39303 | 14.63367 | 13.46678 | 1.851467 | 7.53E-07 | 1.851467 | 5.1E-06  | 0.332989  | 0.69497  |
| ATSG44568 | ATSG44568 | 87.97889 | 62.44861  | 77.25926 | 53.02722 | 62.93439 | 52.53351 | 145.8458 | 75.5223  | 150.3419 | 37.42189 | 43.90102 | 45.57989 | 2.777784 | 1.67E-34 | 0.664669 | 0.012827 | -0.80504  | 0.027607 |
| ATSG44569 | ATSG44569 | 16.64466 | 14.27397  | 7.725926 | 17.73387 | 22.52389 | 11.96209 | 11.33955 | 10.7889  | 15.61994 | 10.55489 | 9.312338 | 6.215439 | 0.409342 | 0.416785 | 0.041457 | 0.949656 | -0.46069  | NA       |
| ATSG44570 | ATSG44570 | 0        | 3.568492  | 3.862963 | 20.20836 | 13.24935 | 9.968408 | 8.893035 | 4.31556  | 6.833722 | 1.919071 | 5.321336 | 2.071813 | 1.859108 | 0.000858 | 0.908567 | 0.164277 | 0.126386  | NA       |
| ATSG44572 | ATSG44572 | 27.34479 | 26.76369  | 24.46543 | 355.9146 | 310.047  | 256.1881 | 178.75   | 158.5968 | 292.8738 | 23.02886 | 30.59768 | 30.04129 | 3.33687  | 6.09E-34 | 2.801562 | 9.55E-24 | 0.054996  | 0.951161 |
| ATSG44574 | ATSG44574 | 1.188904 | 0         | 1.287654 | 6.186234 | 5.962205 | 0.996841 | 2.66791  | 1.07889  | 0.976246 | 0.995936 | 0        | 2.071813 | 1.131729 | 0.0822   | 0.248389 | 0.764899 | 0.03751   | NA       |
| ATSG44575 | ATSG44575 | 2.377808 | 1.784246  | 3.862963 | 68.46099 | 74.19633 | 41.86731 | 16.00746 | 7.55223  | 21.47741 | 4.797678 | 5.321336 | 2.071813 | 3.54099  | 1.58E-14 | 1.666842 | 0.001322 | 0.219099  | 0.864774 |
| ATSG44578 | ATSG44578 | 4.755616 | 1.784246  | 3.862963 | 18.14629 | 11.92441 | 6.977885 | 20.45398 | 12.94668 | 17.57243 | 6.76285  | 11.97301 | 16.5745  | 1.277649 | 0.015381 | 1.620225 | 0.002085 | 1.185317  | NA       |
| ATSG44580 | ATSG44580 | 197.3581 | 262.2842  | 231.7778 | 1019.491 | 818.1471 | 553.2466 | 458.8806 | 350.6392 | 649.2036 | 194.7857 | 215.5141 | 304.5565 | 1.708477 | 1.6E-11  | 1.025952 | 0.000128 | 0.048299  | 0.947063 |
| ATSG44582 | ATSG44582 | 16.64466 | 14.27397  | 14.1642  | 55.6761  | 43.72284 | 44.85784 | 32.90423 | 12.94668 | 35.14486 | 19.19071 | 15.96401 | 11.39497 | 1.51068  | 5.66E-05 | 0.738678 | 0.092319 | 0.024855  | 0.983949 |
| ATSG44585 | ATSG44585 | 2.377808 | 3.568492  | 0        | 32.16841 | 25.17376 | 27.91154 | 19.56468 | 19.42002 | 26.35864 | 0.995936 | 0        | 3.10772  | 2.872476 | 3.66E-09 | 2.48965  | 7.53E-07 | -0.22973  | NA       |
| ATSG44590 | ATSG44590 | 0        | 0         | 0        | 0.412416 | 0        | 0        | 0.889303 | 1.07889  | 0        | 0        | 0        | 0        | 0.073776 | NA       | 0.340813 | NA       | 0         | NA       |
| ATSG44600 | ATSG44600 | 131.9683 | 144.5239  | 124.9025 | 119.1881 | 119.2441 | 121.6146 | 130.7276 | 116.5201 | 144.4844 | 160.2424 | 131.7031 | 158.4937 | -0.14906 | 0.480582 | -0.02615 | 0.920994 | 0.175826  | 0.609679 |
| ATSG44610 | PCAP2     | 1.188904 | 0         | 0        | 5.361402 | 7.949607 | 11.96209 | 7.14428  | 3.23667  | 7.809968 | 0        | 1.330334 | 1.035907 | 1.923044 | 0.001382 | 1.56398  | 0.013908 | 0.04301   | NA       |
| ATSG44620 | CYP706A3  | 72.52314 | 55.31163  | 61.80741 | 28.45667 | 28.48609 | 14.95261 | 21.34328 | 16.18335 | 13.66744 | 84.43914 | 46.56169 | 78.7289  | -1.26915 | 4.32E-05 | -1.72506 | 1.68E-07 | 0.145556  | 0.836113 |
| ATSG44630 | BS        | 9.511232 | 8.92123   | 5.150617 | 3.299325 | 7.28714  | 0.996841 | 4.446571 | 7.55223  | 0        | 19.19071 | 11.97301 | 13.46678 | -0.68996 | 0.270617 | -0.67041 | 0.318945 | 0.743987  | NA       |
| ATSG44635 | MCM6      | 156.9353 | 132.0342  | 148.0802 | 107.228  | 124.5438 | 134.5735 | 118.2774 | 94.94231 | 72.2422  | 202.462  | 176.9344 | 212.3608 | -0.26418 | 0.24575  | -0.59778 | 0.006623 | 0.423534  | 0.170442 |
| ATSG44640 | BGLU13    | 0        | 0         | 0        | 0        | 0        | 0.996841 | 0.889303 | 0        | 0        | 0        | 0        | 2.071813 | 0.118728 | NA       | 0.131053 | NA       | 0.300445  | NA       |
| ATSG44650 | CEST      | 1091.414 | 1136.565  | 1268.34  | 1140.741 | 1005.625 | 1045.686 | 1293.407 | 1293.589 | 1275.954 | 1155.281 | 1108.168 | 1303.17  | -0.12909 | 0.328538 | 0.142194 | 0.299027 | 0.029068  | 0.921154 |
| ATSG44660 | ATSG44660 | 300.7927 | 295.51472 | 233.0654 | 227.241  | 200.7276 | 239.2418 | 294.3595 | 316.1148 | 201.1067 | 276.3463 | 288.6825 | 291.0897 | -0.24041 | 0.256564 | 0.036761 | 0.892622 | 0.1123    | 0.78367  |
| ATSG44670 | ATSG44670 | 102.2457 | 90.99655  | 96.57408 | 32.58083 | 33.12336 | 27.91154 | 24.9005  | 31.28781 | 18.54867 | 60.60099 | 69.17737 | 87.01615 | -1.55548 | 1.55E-11 | -1.86952 | 1.31E-13 | -0.27863  | 0.509225 |
| ATSG44680 | ATSG44680 | 1001.057 | 1241.835  | 1129.273 | 504.7967 | 538.5859 | 582.155  | 577.158  | 581.5217 | 534.9828 | 1169.674 | 1112.159 | 1183.005 | -1.04359 | 4.72E-20 | -0.9806  | 2.13E-17 | 0.042503  | 0.983949 |
| ATSG44690 | ATSG44690 | 1.188904 | 0         | 0        | 0.662467 | 0        | 0        | 0.889303 | 1.07889  | 0        | 0        | 0        | 0        | -0.07436 | NA       | -0.18968 | NA       | -0.18606  | NA       |
| ATSG44700 | GSO2      | 3.566712 | 3.568492  | 1.287654 | 2.474493 | 0.662467 | 1.993682 | 3.557214 | 1.07889  | 0.976246 | 5.757214 | 3.991002 | 4.143626 | -0.37522 | 0.618403 | -0.28013 | 0.735894 | 0.482814  | NA       |
| ATSG44705 | ATSG44705 | 0        | 0         | 0        | 0        | 0        | 0        | 0        | 0        | 0        | 0        | 0        | 0        | #N/A     | #N/A     | #N/A     | #N/A     | #N/A      | #N/A     |
| ATSG44710 | ATSG44710 | 60.6341  | 73.15409  | 90.1358  | 107.228  | 113.9444 | 85.72831 | 84.48383 | 77.68008 | 130.817  | 78.68192 | 103.766  | 92.19568 | 0.443033 | 0.106216 | 0.371304 | 0.215251 | 0.274889  | 0.574235 |
| ATSG44720 | ATSG44720 | 683.6198 | 504.6265  | 620.6494 | 614.4992 | 617.4195 | 640.9686 | 658.0846 | 639.7817 | 839.5716 | 837.6746 | 771.5937 | 741.7091 | 0.016465 | 0.936903 | 0.20544  | 0.227691 | 0.341175  | 0.111803 |
| ATSG44730 | ATSG44730 | 143.8574 | 148.0924  | 167.3951 | 217.343  | 232.526  | 214.3208 | 216.1007 | 216.8569 | 266.5152 | 145.8458 | 146.3367 | 166.781  | 0.521456 | 0.001839 | 0.593914 | 0.000491 | -0.00164  | 0.997083 |
| ATSG44740 | POLH      | 95.11232 | 80.29107  | 63.09506 | 81.24587 | 64.92179 | 67.78517 | 64.91915 | 71.20674 | 53.69353 | 71.96517 | 97.11438 | 89.08796 | -0.14197 | 0.628305 | -0.32013 | 0.266655 | -0.100284 | 0.860198 |
| ATSG44750 | REV1      | 523.1177 | 522.7841  | 578.1568 | 504.3842 | 451.1402 | 545.2719 | 574.49   | 651.6495 | 386.5934 | 547.8948 | 490.8932 | 598.754  | -0.11298 | 0.624448 | -0.011   | 0.968079 | 0.012329  | 0.982852 |
| ATSG44760 | ATSG44760 | 0        | 0         | 0        | 0.662467 | 0        | 0.889303 | 1.07889  | 0        | 0.959536 | 0        | 0        | 0        | 0.095148 | NA       | 0.335415 | NA       | 0.171604  | NA       |
| ATSG44770 | ATSG44770 | 0        | 0         | 0        | 0        | 0        | 0        | 0        | 0        | 0        | 0        | 0        | 2.660668 | 1.035907 | 0        | NA       | 0        | 0.551716  | NA       |
| ATSG44780 | MORF4     | 52.31177 | 55.31163  | 54.08148 | 35.88015 | 29.14856 | 40.87047 | 30.23632 | 39.91893 | 36.1211  | 37.42189 | 38.57969 | 31.0772  | -0.58791 | 0.036966 | -0.57648 | 0.059328 | -0.56356  | 0.190899 |
| ATSG44785 | OSB3      | 461.2947 | 392.5341  | 466.1309 | 323.7462 | 359.7197 | 388.7679 | 459.7699 | 441.266  | 401.2371 | 450.9817 | 413.7339 | 473.4093 | -0.30759 | 0.033716 | -0.02377 | 0.505739 | 0.016556  | 0.96566  |
| ATSG44790 | RAN1      | 861.9554 | 831.4587  | 705.6346 | 606.6633 | 545.873  | 686.8233 | 629.6269 | 689.4107 | 527.1728 | 638.0912 | 633.239  | 563.5332 | -0.3792  | 0.015301 | -0.37205 | 0.021982 | -0.38059  | 0.080295 |
| ATSG44800 | CHR4      | 92.52895 | 635.1915  | 516.0117 | 255.2852 | 219.2767 | 330.9511 | 324.5958 | 448.8182 | 304.5888 | 470.1725 | 469.6379 | 483.7683 | -1.32019 | 2.21E-09 | -0.91208 | 7.05E-05 | -0.52427  | 0.120477 |
| ATSG44820 | ATSG44820 | 93.92341 | 121.3287  | 96.57408 | 230.1279 | 300.7601 | 243.2291 | 154.7388 | 98.17898 | 156.1994 | 47.97678 | 57.20436 | 60.08258 | 1.282431 | 2.3E-09  | 0.392599 | 0.130768 | -0.86517  | 0.005413 |
| ATSG44830 | ATSG44830 | 0        | 0         | 0        | 0        | 0        | 0.889303 | 1.07889  | 0        | 0        | 0        | 0        | 0        | 0        | NA       | 0.3225   | NA       | 0         | NA       |
| ATSG44840 | ATSG44840 | 0        | 0         | 0        | 0        | 0        | 0.889303 | 0        | 0.889303 | 0        | 0        | 0        | 0        | 0        | NA       | 0.160764 | NA       | 0         | NA       |
| ATSG44850 | ATSG44850 | 0        | 0         | 0        | 0        | 0        | 0.889303 | 0        | 0.959536 | 0        | 0        | 0        | 0        | 0        | NA       | 0.136694 | NA       | 0.147196  | NA       |
| ATSG44860 | ATSG44860 | 187.8468 | 142.7397  | 162.2444 | 138.984  | 174.8914 | 147.5324 | 158.296  | 155.3602 | 154.2469 | 165.9997 | 180.9254 | 193.7145 | -0.10637 | 0.623155 | -0.08343 | 0.730998 | 0.016556  | 0.750218 |
| ATSG44870 | LAZ5      | 471.9949 | 488.8834  | 439.0901 | 408.7038 | 401.4552 | 533.3098 | 536.25   | 591.2317 | 349.4961 | 350.2305 | 381.8058 | 416.4344 | -0.06065 | 0.81872  | 0.075662 | 0.784625 | -0.27721  | 0.428694 |
| ATSG44875 | ATSG44875 | 0        | 0         | 1.287654 | 0        | 0        | 0.889303 | 0        | 0.889303 | 0        | 0.976246 | 1.919071 | 0        | -0.29565 | NA       | 0.097409 | NA       | 0.11353   | NA       |
| ATSG44880 | ATSG44880 | 0        | 0         | 0        | 0.662467 | 0        | 0.889303 | 0        | 0.889303 | 0        | 0        | 0        | 0        | 0.097058 | NA       | 0.130384 | NA       | 0         | NA       |
| ATSG44890 | ATSG44890 | 1.188904 | 0         | 0        | 0        | 0        | 0.889303 | 1.07889  | 0        | 0        | 0        | 0        | 2.071813 | -0.28844 | NA       | 0.112492 | NA       | 0.13324   | NA       |
| ATSG44894 | ATSG44894 | 0        | 0         | 0        | 0        | 0        | 0        | 0        | 0        | 0        | 0        | 0        | 0        | #N/A     | #N/A     | #N/A     | #N/A     | #N/A      | #N/A     |
| ATSG44900 | ATSG44900 | 2.377808 | 1.784246  | 1.287654 | 0.412416 | 0.662467 | 0        | 0        | 0        | 0        | 0        | 1.330334 | 0        | -0.67266 | NA       | -0.91996 | NA       | -0.6473   | NA       |
| ATSG44910 | ATSG44910 | 5.94452  | 10.70548  | 9.01358  | 7.85896  | 14.95261 | 7.114428 | 7.55223  | 4.88123  | 5.757214 | 5.321336 | 3.10772  | 0.391033 | 0.506648 | -0.2796  | 0.682696 | -0.60795 | NA        | NA       |
| ATSG44920 | ATSG44920 | 4.755616 | 1.784246  | 5.150617 | 28.04426 | 26.49869 | 24.92102 | 1.778607 | 4.31556  | 5.857476 | 4.797678 | 3.991002 | 10.35907 | 2.206992 | 5.95E-06 | -0.08232 | 0.91701  |           |          |

|           |           |          |          |          |          |          |          |          |          |          |          |          |          |           |          |           |          |          |          |
|-----------|-----------|----------|----------|----------|----------|----------|----------|----------|----------|----------|----------|----------|----------|-----------|----------|-----------|----------|----------|----------|
| ATSG45340 | CYP707A3  | 34.47821 | 24.97944 | 15.45185 | 20.62078 | 21.86142 | 69.77885 | 124.5025 | 141.3346 | 124.9595 | 34.54328 | 22.61568 | 25.89766 | 0.446782  | 0.334854 | 2.113773  | 4.04E-08 | 0.122437 | 0.903758 |
| ATSG45350 | ATSG45350 | 628.9302 | 551.332  | 629.663  | 532.4285 | 490.2258 | 428.6415 | 401.9652 | 387.3215 | 445.2986 | 573.8203 | 607.9626 | 488.9479 | -0.30893  | 0.15493  | -0.32743  | 0.147666 | -0.11458 | 0.790591 |
| ATSG45360 | SKIP1A    | 345.971  | 353.2807 | 404.3235 | 470.1538 | 459.0898 | 475.4931 | 519.3532 | 456.3704 | 487.1468 | 417.398  | 349.8778 | 449.5834 | 0.341891  | 0.016813 | 0.401083  | 0.005764 | 0.141813 | 0.595848 |
| ATSG45370 | ATSG45370 | 55.87849 | 69.5856  | 73.3963  | 86.60727 | 88.77061 | 94.69987 | 96.04478 | 77.68008 | 62.47974 | 60.45074 | 79.82004 | 53.86714 | 0.426788  | 0.098436 | 0.247407  | 0.412854 | -0.04023 | 0.953606 |
| ATSG45380 | DUR3      | 187.8468 | 212.3253 | 154.5185 | 493.249  | 490.2258 | 509.3856 | 228.551  | 262.1703 | 201.1067 | 56.6126  | 46.56169 | 81.83662 | 1.406756  | 6.76E-16 | 0.317062  | 0.140709 | -1.50484 | 6.61E-12 |
| ATSG45390 | CLPP4     | 2761.824 | 2471.181 | 2692.485 | 2061.665 | 2669.743 | 2007.637 | 2459.813 | 2234.381 | 2944.358 | 2948.653 | 3442.904 | 2880.856 | -0.23037  | 0.180805 | -0.052764 | 0.810399 | 0.221927 | 0.408412 |
| ATSG45400 | RPA1C     | 68.95643 | 41.03766 | 38.62963 | 27.21943 | 30.47349 | 34.88943 | 28.45771 | 28.05114 | 21.47741 | 36.46235 | 37.24935 | 54.54398 | -0.6748   | 0.033137 | -0.88164  | 0.007433 | -0.3237  | 0.571353 |
| ATSG45410 | ATSG45410 | 612.2855 | 820.7532 | 690.1827 | 1252.919 | 1113.607 | 1198.203 | 982.6807 | 1191.968 | 120.6113 | 576.0346 | 635.0107 | 0.740693 | 0.473E-07 | 0.567839 | 0.000205  | -1.2809  | 0.676985 |          |
| ATSG45420 | ATSG45420 | 350.7267 | 392.5341 | 410.7617 | 439.635  | 497.5129 | 441.6005 | 369.0609 | 392.7159 | 420.762  | 418.3575 | 473.5989 | 396.7522 | 0.255504  | 0.080396 | 0.035971  | 0.856515 | 0.155936 | 0.545845 |
| ATSG45428 | CPuORF24  | 0        | 0        | 0        | 0        | 0        | 0        | 0        | 0        | 0        | 0        | 0        | 0        | #N/A      | #N/A     | #N/A      | #N/A     | #N/A     | #N/A     |
| ATSG45430 | ATSG45430 | 0        | 0        | 0        | 0.412416 | 0        | 0        | 0.889303 | 0        | 0.976246 | 0        | 0        | 0        | 0.074085  | NA       | 0.330313  | NA       | 0        | NA       |
| ATSG45440 | ATSG45440 | 16.64466 | 5.352738 | 7.725926 | 14.43455 | 17.22415 | 17.94313 | 11.56095 | 9.710009 | 18.54867 | 5.757214 | 10.64267 | 3.10772  | 0.57254   | 0.274242 | 0.305051  | 0.623849 | -0.5443  | NA       |
| ATSG45450 | ATSG45450 | 11.88904 | 5.352738 | 3.862963 | 5.773818 | 10.59948 | 5.981045 | 14.22886 | 10.7889  | 9.76246  | 12.47396 | 5.321336 | 9.323159 | 0.013392  | 0.985447 | 0.541395  | 0.379192 | 0.267491 | NA       |
| ATSG45460 | ATSG45460 | 79.65656 | 94.56504 | 59.2321  | 43.30364 | 56.97219 | 45.85468 | 52.46891 | 35.60337 | 34.16861 | 53.734   | 55.87403 | 53.86714 | -0.63405  | 0.018531 | -0.86428  | 0.001995 | -0.47756 | 0.267988 |
| ATSG45469 | ATSG45469 | 2.377808 | 10.70548 | 2.575309 | 0.412416 | 1.324935 | 1.993682 | 2.66791  | 0        | 1.952492 | 5.757214 | 3.991002 | 2.071813 | -1.12459  | 0.08655  | -0.87071  | 0.220343 | -0.1722  | NA       |
| ATSG45470 | ATSG45470 | 63.01191 | 83.85956 | 68.24568 | 117.126  | 137.7932 | 104.6683 | 56.02612 | 57.18117 | 117.1495 | 54.69353 | 54.54369 | 68.36983 | 0.71587   | 0.01411  | 0.102197  | 0.801681 | -0.24752 | 0.675332 |
| ATSG45472 | ATSG45472 | 0        | 0        | 0        | 0        | 0        | 0        | 0        | 0        | 0        | 0        | 0        | 0        | #N/A      | #N/A     | #N/A      | #N/A     | #N/A     | #N/A     |
| ATSG45475 | ATSG45475 | 1.188904 | 3.568492 | 6.438272 | 0.412416 | 0.662467 | 1.993682 | 2.66791  | 3.23667  | 0.976246 | 2.878607 | 1.330334 | 6.215439 | -0.99834  | 0.134899 | -0.37772  | 0.63736  | -0.01638 | NA       |
| ATSG45480 | ATSG45480 | 324.5708 | 249.7944 | 207.3123 | 124.9612 | 134.4809 | 208.3397 | 190.3109 | 208.2258 | 99.57709 | 189.0285 | 210.1928 | 207.1213 | -0.71388  | 0.010802 | -0.6185   | 0.036241 | -0.34971 | 0.472374 |
| ATSG45490 | ATSG45490 | 792.9989 | 861.7908 | 907.7963 | 772.8668 | 858.5576 | 825.3842 | 603.8371 | 602.0206 | 890.3363 | 774.3453 | 931.2338 | 840.1802 | -0.05984  | 0.785149 | -0.28385  | 0.134313 | -0.01011 | 0.983922 |
| ATSG45500 | ATSG45500 | 577.8073 | 520.9998 | 517.637  | 581.506  | 618.7444 | 685.8265 | 439.3159 | 496.2894 | 587.7001 | 355.0282 | 339.2352 | 384.3213 | 0.215512  | 0.177383 | -0.08656  | 0.654085 | -0.57484 | 0.001457 |
| ATSG45510 | ATSG45510 | 2233.951 | 1975.16  | 1722.882 | 1733.383 | 1770.113 | 2180.001 | 1358.856 | 1535.26  | 1366.704 | 1383.65  | 1411.484 | 1534.178 | -0.6259   | 0.731246 | -0.4715   | 0.011032 | -0.44838 | 0.014785 |
| ATSG45520 | ATSG45520 | 47.55616 | 32.11643 | 32.19136 | 10.31039 | 11.26194 | 12.95893 | 22.23259 | 20.49891 | 23.4299  | 41.26003 | 51.88302 | 38.32854 | -1.59115  | 1.35E-06 | -0.71355  | 0.046079 | 0.199257 | 0.764564 |
| ATSG45530 | ATSG45530 | 33.28931 | 32.11643 | 36.05432 | 7.835896 | 3.123236 | 10.96525 | 13.39955 | 11.86779 | 4.88123  | 24.94793 | 18.62468 | 20.71813 | -1.96096  | 7.23E-07 | -1.53818  | 0.000208 | -0.58694 | 0.371122 |
| ATSG45540 | ATSG45540 | 33.28931 | 21.41095 | 33.47901 | 7.835896 | 5.962205 | 7.974726 | 8.003731 | 7.55223  | 5.857446 | 18.23118 | 23.94601 | 26.93357 | -1.79347  | 3.63E-06 | -1.78307  | 1.83E-05 | -0.34224 | 0.638432 |
| ATSG45550 | MOB1A     | 291.2815 | 328.3013 | 343.8037 | 464.3799 | 507.4499 | 495.4299 | 380.6219 | 331.2192 | 429.5482 | 262.9128 | 234.1388 | 355.3159 | 0.595374  | 0.00067  | 0.24168   | 0.214247 | -0.16768 | 0.626543 |
| ATSG45560 | EDR2L     | 86.78899 | 73.15409 | 79.83457 | 68.66935 | 54.32232 | 67.97885 | 67.97007 | 39.04984 | 91.15588 | 87.80204 | 105.6625 | 0        | -0.15821  | 0.627485 | -0.41853  | 0.179442 | 0.232778 | 0.654642 |
| ATSG45570 | ATSG45570 | 0        | 1.784246 | 0        | 0.412416 | 1.324935 | 1.993682 | 2.66791  | 1.07889  | 0        | 0        | 0        | 0        | 0.327359  | NA       | 0.352465  | NA       | -0.29723 | NA       |
| ATSG45573 | ATSG45573 | 0        | 0        | 1.287654 | 0        | 0        | 0        | 0        | 0        | 0        | 0        | 0        | 0        | -0.2184   | NA       | -0.20558  | NA       | -0.19918 | NA       |
| ATSG45576 | ATSG45576 | 2.377808 | 0        | 0        | 0.412416 | 0        | 0        | 0        | 0        | 0        | 0        | 0        | 0        | 0.065109  | NA       | 0         | NA       | 0.150531 | NA       |
| ATSG45580 | ATSG45580 | 0        | 2.575309 | 3.71174  | 3.123236 | 0.996841 | 2.66791  | 2.15778  | 2.928738 | 0.995936 | 1.330334 | 6.215439 | 0        | 0.320628  | 0.677762 | 0.244909  | 0.772342 | 0.324791 | NA       |
| ATSG45590 | ATSG45590 | 27.34479 | 32.11643 | 43.78025 | 50.3147  | 44.38531 | 34.88943 | 21.34328 | 34.52448 | 43.93107 | 28.78607 | 31.92802 | 42.47217 | 0.32206   | 0.39459  | -0.05362  | 0.912185 | -0.00014 | 0.998413 |
| ATSG45595 | ATSG45595 | 0        | 0        | 0        | 0        | 0        | 0        | 0        | 0        | 0        | 0        | 0        | 0        | #N/A      | #N/A     | #N/A      | #N/A     | #N/A     | #N/A     |
| ATSG45600 | TA1F48    | 180.7134 | 165.9349 | 251.0926 | 302.3006 | 349.1203 | 297.0586 | 281.0199 | 219.0147 | 238.204  | 284.0225 | 260.7455 | 245.5098 | 0.644594  | 0.000412 | 0.292004  | 0.17004  | 0.386645 | 0.175751 |
| ATSG45605 | ATSG45605 | 0        | 0        | 0        | 1.649662 | 1.987402 | 1.993682 | 0.889303 | 0        | 0.976246 | 0        | 1.330334 | 1.035907 | 0.934727  | 0.118552 | 0.313236  | 0.654495 | 0.375477 | NA       |
| ATSG45610 | SUV2      | 177.1467 | 190.9143 | 231.7778 | 165.3786 | 186.1533 | 146.5356 | 314.8134 | 222.2513 | 146.4369 | 241.803  | 235.4691 | 237.2226 | -0.25579  | 0.356342 | 0.182441  | 0.549605 | 0.24206  | 0.595576 |
| ATSG45620 | RP9NA     | 441.0834 | 438.9245 | 454.542  | 426.8501 | 478.9638 | 518.3572 | 503.3458 | 505.9994 | 445.1682 | 469.2129 | 403.0912 | 426.7935 | 0.086383  | 0.956555 | 0.122095  | 0.464164 | -0.03624 | 0.915641 |
| ATSG45630 | ATSG45630 | 3.566712 | 0        | 0        | 3.862963 | 9.897974 | 4.637271 | 13.95577 | 8.003731 | 4.31556  | 0.976246 | 2.660668 | 4.143626 | 1.207976  | 0.044813 | 0.878968  | 0.188064 | -0.0647  | NA       |
| ATSG45640 | ATSG45640 | 0        | 0        | 0        | 0        | 0.662467 | 0.996841 | 0        | 0        | 0.976246 | 0        | 0        | 0        | 0.275104  | NA       | 0.160764  | NA       | 0        | NA       |
| ATSG45650 | ATSG45650 | 502.9604 | 503.1574 | 473.8568 | 370.3492 | 304.0725 | 288.087  | 258.7873 | 235.198  | 174.748  | 32.71612 | 351.2082 | 371.8904 | -0.60193  | 0.000297 | -1.12163  | 8.09E-12 | -0.48398 | 0.033194 |
| ATSG45660 | ATSG45660 | 51.12287 | 39.25341 | 38.62963 | 47.42779 | 66.24673 | 50.83888 | 54.24751 | 33.44559 | 84.9334  | 52.77446 | 45.27069 | 58.01077 | 0.313756  | 0.399615 | 0.38457   | 0.318055 | 0.227223 | 0.739371 |
| ATSG45670 | ATSG45670 | 448.2168 | 499.5889 | 515.0617 | 548.9251 | 535.2736 | 559.2277 | 311.2562 | 318.2725 | 309.47   | 530.6232 | 530.8033 | 535.5637 | 0.168408  | 0.173002 | -0.63149  | 4.25E-08 | 0.128001 | 0.5489   |
| ATSG45680 | FKBP13    | 822.7215 | 959.9244 | 1028.836 | 532.4285 | 636.631  | 579.1645 | 782.5871 | 736.8818 | 1486.823 | 1266.587 | 860.7261 | 1357.038 | -0.65545  | 0.011252 | 0.092905  | 0.790657 | 0.297404 | 0.514465 |
| ATSG45690 | ATSG45690 | 0        | 0        | 0        | 0        | 0        | 0.889303 | 0        | 0        | 0        | 0        | 0        | 0        | 0         | NA       | 0.160764  | NA       | 0        | NA       |
| ATSG45700 | ATSG45700 | 41.61164 | 33.90067 | 34.76667 | 55.6761  | 68.8966  | 53.8294  | 48.02239 | 34.52448 | 75.12094 | 41.26003 | 47.89202 | 53.86714 | 0.641298  | 0.043839 | 0.474182  | 0.181855 | 0.335529 | 0.566821 |
| ATSG45710 | HSFA4C    | 159.3131 | 190.9143 | 182.8469 | 204.5581 | 242.463  | 243.2291 | 225.8831 | 224.0911 | 176.2054 | 174.6355 | 147.6671 | 184.3914 | 0.365412  | 0.037052 | 0.279126  | 0.149151 | -0.0599  | 0.885319 |
| ATSG45715 | ATSG45715 | 0        | 0        | 0        | 0        | 0        | 0        | 0        | 0        | 0        | 0        | 0        | 0        | #N/A      | #N/A     | #N/A      | #N/A     | #N/A     | #N/A     |
| ATSG45720 | ATSG45720 | 38.04493 | 19.62671 | 16.73951 | 11.13522 | 12.58688 | 11.96209 | 11.56095 | 14.02557 | 9.76246  | 22.06932 | 23.94601 | 30.04129 | -0.96831  | 0.016803 | -0.96561  | 0.026744 | 0.011744 | 0.99191  |
| ATSG45730 | ATSG45730 | 11.88904 | 10.70548 | 18.02716 | 16.49662 | 12.58688 | 9.968408 | 12.45025 | 5.39445  | 8.786214 | 14.39303 | 27.93701 | 12.43088 | -0.02738  | 0.965336 | -0.49537  | 0.382697 | 0.331697 | NA       |
| ATSG45740 | ATSG45740 | 4.755616 | 1.713684 | 2.575309 | 3.299325 | 5.299738 | 3.987363 | 1.778607 | 5.39445  | 4.88123  | 0.995936 | 5.321336 | 5.179533 | -0.10749  | 0.892995 | -0.1536   | 0.854807 | -0.21204 | NA       |
| ATSG45745 | ATSG45745 | 0        | 0        | 0        | 0        | 0        | 0.996841 | 0        | 0        | 0.976246 | 0        | 0        | 0        | 0.15625   | NA       | 0.0       | NA       | 0        | NA       |
| ATSG45750 | RABA1C    | 300.7927 | 314.0273 | 306.4617 | 510.1581 | 575.6841 | 586.1424 | 571.158  | 468.2382 | 598.4388 | 332.9589 | 327.2622 | 338.7414 | 0.846488  | 3.66E-10 | 0.828615  | 1.62E-09 | 0.116541 | 0.692347 |
| ATSG45760 | ATSG45760 | 98.67903 | 110.6233 | 136.4914 | 120.8378 | 111.2945 | 100.6809 | 90.70896 | 90.62675 | 66.64835 | 72.9247  |          |          |           |          |           |          |          |          |

|           |            |          |          |          |           |          |          |          |          |           |          |          |          |          |          |          |          |          |           |
|-----------|------------|----------|----------|----------|-----------|----------|----------|----------|----------|-----------|----------|----------|----------|----------|----------|----------|----------|----------|-----------|
| ATSG46200 | ATSG46200  | 0        | 1.784246 | 0        | 0.412416  | 1.324935 | 0        | 0        | 1.07889  | 0.976246  | 0        | 0        | 0.069321 | NA       | 0.090412 | NA       | -0.28671 | NA       |           |
| ATSG46210 | CUL4       | 971.3345 | 995.6093 | 976.042  | 783.1772  | 869.1571 | 879.2136 | 965.7836 | 979.6321 | 845.429   | 920.1947 | 1012.384 | 934.3877 | -0.2175  | 0.06813  | -0.07553 | 0.603764 | -0.03824 | 0.6887392 |
| ATSG46220 | ATSG46220  | 43.98945 | 29.25341 | 27.04074 | 6.186234  | 7.28714  | 9.968408 | 19.56468 | 16.18335 | 14.64369  | 58.53167 | 47.89202 | 64.2262  | -2.05428 | 3.96-09  | -1.02657 | 0.004286 | 0.613322 | 0.209374  |
| ATSG46230 | ATSG46230  | 28.53369 | 30.33218 | 30.9037  | 131.1482  | 145.7428 | 107.6588 | 72.03358 | 69.04896 | 87.86214  | 39.34096 | 35.91902 | 27.96948 | 2.009475 | 1.23E-15 | 1.272596 | 2.57E-06 | 0.179552 | 0.778754  |
| ATSG46240 | KATP1      | 275.8257 | 289.0479 | 329.6395 | 683.72036 | 74.19633 | 96.63956 | 72.92289 | 69.04896 | 64.43224  | 232.2076 | 243.4511 | 274.5152 | -1.78963 | 6.97E-29 | -2.06515 | 4.16E-33 | -0.24939 | 0.366998  |
| ATSG46250 | LAR6PA     | 1820.212 | 1711.092 | 1860.661 | 1277.251  | 1426.955 | 1423.489 | 1304.608 | 1454.344 | 1356.006  | 1818.32  | 1825.218 | 1573.154 | -0.38422 | 0.000866 | -0.38472 | 0.000866 | -0.09595 | 0.817029  |
| ATSG46260 | ATSG46260  | 156.9353 | 181.9931 | 171.1765 | 109.7025  | 101.3575 | 150.523  | 120.056  | 132.7035 | 58.57476  | 106.5085 | 94.45371 | 108.7702 | -0.31951 | 0.307084 | -0.51657 | 0.096432 | -0.51992 | 0.21644   |
| ATSG46270 | ATSG46270  | 341.2154 | 328.3013 | 296.1605 | 228.8906  | 208.0147 | 256.1881 | 312.1455 | 332.2981 | 177.6768  | 247.5602 | 239.4601 | 266.2270 | -0.46642 | 0.035474 | -0.2253  | 0.381927 | -0.34623 | 0.3243    |
| ATSG46280 | MCM3       | 263.9367 | 228.3835 | 236.9284 | 161.2545  | 161.642  | 163.4819 | 170.7463 | 195.2791 | 148.3894  | 275.3867 | 275.3791 | 289.0179 | -0.58089 | 0.000135 | -0.50248 | 0.001852 | 0.196653 | 0.469967  |
| ATSG46290 | KAS1       | 1030.78  | 867.1436 | 836.9753 | 473.0047  | 455.7775 | 478.4836 | 563.8184 | 573.9694 | 586.7238  | 715.8136 | 735.6747 | 787.289  | -0.95211 | 2.9E-17  | -0.66127 | 1.31E-08 | -0.28818 | 0.094682  |
| ATSG46295 | ATSG46295  | 1.188904 | 0        | 0        | 0.149662  | 1.987402 | 3.987363 | 0.889303 | 3.23667  | 6.833722  | 0        | 0        | 0        | 0.795821 | 0.232327 | 1.108065 | 0.093333 | -0.29395 | NA        |
| ATSG46300 | ATSG46300  | 0        | 0        | 0        | 0.412416  | 0        | 0.996841 | 0        | 0        | 0         | 0        | 0        | 0        | 0.224618 | NA       | 0        | NA       | 0        | NA        |
| ATSG46310 | ATSG46310  | 0        | 0        | 0        | 0         | 0.662467 | 0        | 0        | 0        | 0.976246  | 0        | 0        | 0        | 0.097788 | NA       | 0.140077 | NA       | 0        | NA        |
| ATSG46315 | UG-29      | 0        | 0        | 0        | 0         | 0        | 0        | 0        | 0        | 0         | 0        | 0        | 0        | #N/A     | #N/A     | #N/A     | #N/A     | #N/A     | #N/A      |
| ATSG46320 | ATSG46320  | 0        | 0        | 0        | 0         | 0        | 0        | 0        | 0        | 0         | 0        | 0        | 0        | #N/A     | #N/A     | #N/A     | #N/A     | #N/A     | #N/A      |
| ATSG46325 | ATSG46325  | 0        | 0        | 0        | 0         | 0        | 0.996841 | 0        | 0        | 0         | 0        | 0        | 0        | 0.15625  | NA       | 0        | NA       | 0        | NA        |
| ATSG46330 | FLS2       | 487.4506 | 428.219  | 405.6111 | 281.2674  | 293.473  | 316.9954 | 217.8794 | 204.9891 | 196.2254  | 258.1151 | 248.7725 | 306.6283 | -0.56593 | 6.39E-05 | -1.0784  | 3.06E-14 | -0.6892  | 4.02E-05  |
| ATSG46340 | ATSG46340  | 326.9486 | 314.0273 | 325.7765 | 369.9368  | 364.357  | 439.6068 | 420.6405 | 371.1381 | 230.3941  | 279.2249 | 300.6555 | 281.7666 | 0.269186 | 0.227713 | 0.078052 | 0.78029  | -0.16318 | 0.688768  |
| ATSG46350 | WRKY8      | 11.88904 | 32.11643 | 20.60247 | 76.29688  | 73.53387 | 74.76306 | 1.26811  | 131.6246 | 100.5533  | 25.90746 | 31.92802 | 33.14901 | 1.730498 | 1.05E-09 | 2.380757 | 9.75E-18 | 0.484277 | 0.375608  |
| ATSG46360 | KCO3       | 0        | 0        | 0        | 0.412416  | 0        | 0        | 0        | 0        | 0.778607  | 0        | 0        | 0        | 0.060593 | NA       | 0.260815 | NA       | 0        | NA        |
| ATSG46370 | TPK2       | 0        | 0        | 0        | 0.412416  | 0        | 0        | 0        | 0        | 0.976246  | 0        | 0.660668 | 2.071813 | 0.027959 | NA       | 0.153127 | NA       | 0.69128  | NA        |
| ATSG46380 | ATSG46380  | 0        | 1.784246 | 0        | 0         | 0        | 1.778607 | 1.07889  | 0        | 0         | 1.330334 | 4.143626 | -0.37796 | 0.538118 | 0.199374 | 0.776158 | 0.518558 | NA       | NA        |
| ATSG46390 | CTPA1      | 331.7042 | 376.4759 | 332.2148 | 223.1168  | 310.0347 | 309.0206 | 551.3682 | 461.7649 | 504.7192  | 424.1147 | 443.0012 | 476.517  | -0.3055  | 0.085092 | 0.539818 | 0.001299 | 0.365701 | 0.138772  |
| ATSG46400 | AT PRP39-2 | 194.9802 | 201.6198 | 181.5593 | 150.1193  | 113.9444 | 173.4503 | 179.6393 | 190.9635 | 94.69586  | 188.069  | 228.8174 | 156.4219 | -0.38704 | 0.166189 | -0.29843 | 0.330338 | -0.01356 | 0.986272  |
| ATSG46410 | SSP4       | 303.1705 | 351.4965 | 303.8864 | 383.1341  | 392.8431 | 507.392  | 465.995  | 526.4983 | 317.2799  | 283.063  | 324.6015 | 292.1256 | 0.40862  | 0.051238 | 0.440607 | 0.041129 | -0.08761 | 0.852469  |
| ATSG46417 | ATSG46417  | 0        | 0        | 0        | 0         | 0        | 0.889303 | 0        | 0        | 0         | 0        | 0        | 0        | 0        | 0        | 0.160764 | NA       | 0        | NA        |
| ATSG46420 | ATSG46420  | 1853.501 | 1941.26  | 1940.495 | 1163.424  | 1344.809 | 1141.383 | 1698.57  | 1619.414 | 1792.388  | 2051.487 | 2282.853 | 2209.589 | -0.64616 | 4.89E-10 | -0.16454 | 0.185816 | 0.188672 | 0.278942  |
| ATSG46430 | RPL32B     | 954.6899 | 1038.431 | 1142.149 | 1551.095  | 1585.284 | 1268.978 | 1088.507 | 1048.681 | 1498.538  | 987.3622 | 1046.973 | 997.578  | 0.483358 | 0.003491 | 0.21003  | 0.27424  | -0.04773 | 0.905042  |
| ATSG46440 | ATSG46440  | 21.40027 | 28.54794 | 20.60247 | 37.76063  | 37.76063 | 21.9305  | 48.91169 | 35.60337 | 42.95482  | 24.94793 | 30.59768 | 20.71813 | 0.471689 | 0.203637 | 0.810304 | 0.024506 | 0.105041 | 0.903159  |
| ATSG46450 | ATSG46450  | 300.7927 | 335.4383 | 260.1062 | 268.895   | 255.7124 | 354.8753 | 421.5299 | 493.0527 | 273.3489  | 238.9244 | 259.4151 | 275.5511 | -0.02863 | 0.926117 | 0.395487 | 0.106491 | -0.20227 | 0.637671  |
| ATSG46460 | PCMP-H49   | 30.9115  | 19.62671 | 27.04074 | 18.97112  | 14.57428 | 21.9305  | 28.45771 | 28.05114 | 24.40615  | 32.62421 | 14.63367 | 26.93357 | -0.47503 | 0.232713 | 0.035978 | 0.944862 | -0.05244 | 0.958266  |
| ATSG46470 | RP56       | 1298.283 | 1404.202 | 1182.067 | 933.7089  | 808.2101 | 1312.839 | 1161.43  | 1110.178 | 644.3224  | 1138.969 | 1113.821 | 1094.953 | -0.33587 | 0.147441 | -0.39888 | 0.113821 | -0.25427 | 0.540008  |
| ATSG46490 | ATSG46490  | 369.7491 | 378.2602 | 319.3383 | 437.9853  | 504.1376 | 499.4172 | 479.3346 | 495.3176 | 338.7574  | 287.8607 | 324.6015 | 309.7361 | 0.426021 | 0.00936  | 0.208094 | 0.273836 | -0.207   | 0.482633  |
| ATSG46500 | ATSG46500  | 57.06739 | 69.5856  | 41.20494 | 109.7025  | 135.1433 | 133.5767 | 96.0199  | 118.6779 | 117.26596 | 33.58375 | 41.24035 | 35.22082 | 1.135197 | 6.3E-06  | 0.763885 | 0.005161 | -0.5622  | 0.207802  |
| ATSG46510 | ATSG46510  | 395.905  | 380.0444 | 388.8716 | 380.6596  | 420.6667 | 498.4204 | 481.1132 | 482.2638 | 398.3084  | 316.6468 | 341.8958 | 314.9156 | 0.147661 | 0.392103 | 0.220905 | 0.199841 | -0.25769 | 0.300853  |
| ATSG46520 | VICTR      | 229.4585 | 201.6198 | 222.7642 | 278.3805  | 267.6368 | 336.9322 | 336.1567 | 354.9548 | 261.6339  | 181.9522 | 194.2288 | 189.5709 | 0.414343 | 0.001814 | 0.527583 | 0.002787 | -0.21201 | 0.509982  |
| ATSG46530 | ATSG46530  | 20.21137 | 8.92123  | 15.45183 | 12.78488  | 11.92441 | 9.968408 | 8.003731 | 10.7889  | 8.786214  | 21.85074 | 21.28534 | 18.64632 | -0.33545 | 0.497334 | -0.63168 | 0.211933 | 0.469969 | NA        |
| ATSG46540 | ABC87      | 0        | 1.784246 | 1.287654 | 0         | 0        | 0        | 1.07889  | 0        | 0         | 0        | 0        | 3.10772  | -0.5085  | NA       | -0.26657 | NA       | 0.055031 | NA        |
| ATSG46550 | GTE12      | 183.0912 | 194.4828 | 171.258  | 220.2299  | 223.2515 | 213.3239 | 231.2189 | 226.5669 | 237.2278  | 195.7453 | 166.2917 | 224.7917 | 0.260537 | 0.125323 | 0.339454 | 0.050539 | 0.105563 | 0.758818  |
| ATSG46560 | ATSG46560  | 189.0357 | 144.5239 | 173.8333 | 186.4118  | 210.6646 | 200.365  | 210.7649 | 204.9891 | 191.3442  | 192.8667 | 158.3097 | 204.0736 | 0.21659  | 0.249729 | 0.242701 | 0.220462 | 0.122371 | 0.733733  |
| ATSG46570 | BSK2       | 243.7253 | 244.4417 | 220.1889 | 152.1813  | 131.831  | 149.5261 | 152.0709 | 126.2301 | 141.5557  | 210.1383 | 186.2468 | 243.438  | -0.69259 | 0.000023 | -0.7349  | 0.000015 | -0.13766 | 0.680453  |
| ATSG46580 | ATSG46580  | 932.1007 | 788.6367 | 771.305  | 501.9098  | 438.5533 | 489.4488 | 671.4241 | 679.7007 | 660.9185  | 640.0103 | 713.059  | 814.2225 | -0.79273 | 1.57E-09 | -0.30669 | 0.03786  | -0.20102 | 0.388952  |
| ATSG46590 | ana0C96    | 3.566712 | 3.568492 | 5.150617 | 18.14629  | 15.89921 | 13.95577 | 19.56468 | 19.42002 | 27.33489  | 9.595356 | 1.330334 | 8.287252 | 1.491094 | 0.002545 | 1.882888 | 0.000123 | 0.434143 | NA        |
| ATSG46595 | ATSG46595  | 0        | 0        | 0        | 0         | 0        | 0        | 0        | 0        | 0         | 0        | 0        | 0        | #N/A     | #N/A     | #N/A     | #N/A     | #N/A     | #N/A      |
| ATSG46600 | ALMT13     | 33.28931 | 26.76369 | 14.1642  | 6.598469  | 2.649869 | 3.987363 | 14.22886 | 6.47334  | 5.857476  | 35.50282 | 27.93701 | 30.04129 | -1.99077 | 6.46E-06 | -1.23695 | 0.00788  | 0.315821 | 0.706832  |
| ATSG46610 | ALMT14     | 0        | 0        | 0        | 0.826483  | 1.324935 | 0.996841 | 2.66791  | 1.07889  | 0         | 0        | 0.660668 | 0        | 0.492391 | NA       | 0.576632 | NA       | 0.366681 | NA        |
| ATSG46620 | ATSG46620  | 108.1903 | 85.64381 | 103.0123 | 155.8931  | 163.6294 | 143.5451 | 108.495  | 104.6523 | 191.3442  | 93.07496 | 99.77505 | 125.3447 | 0.609297 | 0.017008 | 0.419226 | 0.138504 | 0.08781  | 0.88409   |
| ATSG46630 | AP2M       | 624.1964 | 729.7566 | 669.5803 | 793.4876  | 853.2578 | 803.4537 | 757.6866 | 777.8796 | 717.5408  | 569.9642 | 621.266  | 608.0771 | 0.27784  | 0.015372 | 0.152773 | 0.227808 | -0.16527 | 0.400342  |
| ATSG46640 | AHL8       | 24.96998 | 28.54794 | 16.73951 | 16.90904  | 13.91181 | 12.95893 | 34.68284 | 30.20892 | 17.57243  | 38.38143 | 26.60668 | 41.43626 | -0.57895 | 0.154331 | 0.227983 | 0.634062 | 0.165731 | 0.337449  |
| ATSG46645 | ATSG46645  | 0        | 0        | 0        | 0         | 0.662467 | 0        | 0.889303 | 0        | 0         | 0        | 0        | 0        | 0.097058 | NA       | 0.130384 | NA       | 0        | NA        |
| ATSG46650 | ATL30      | 0        | 0        | 0        | 0.412416  | 0.662467 | 0        | 1.07889  | 0        | 1.919071  | 0        | 0        | 0        | 0.183422 | NA       | 0.162041 | NA       | 0.322453 | NA        |
| ATSG46660 | ATSG46660  | 2.377808 | 3.568492 | 1.287654 | 0         | 0        | 0        | 2.990522 | 1.778607 | 1.07889   | 0        | 1.919071 | 0        | -1.13955 | NA       | -1.05793 | NA       | -0.63133 | NA        |
| ATSG46665 | ATSG46665  | 5.04452  | 7.136984 | 1.287654 | 1.649662  | 0        | 2.990522 | 1.778607 | 1.07889  | 0         | 4.976778 | 6.65167  | 1.035907 | -0.88219 | 0.193821 | -1.0489  | 0.128644 | -0.10212 | NA        |
| ATSG46670 | ATSG46670  | 1.188904 | 0        | 1.287654 | 1.237427  | 0.662467 | 0.996841 | 0        | 0        | 0         | 0        | 1.330334 | 2.071813 | 0.081305 | NA       | -0.51884 | NA       | 0.113957 |           |

|           |           |          |          |          |          |          |          |          |          |          |          |          |          |           |          |          |          |          |          |
|-----------|-----------|----------|----------|----------|----------|----------|----------|----------|----------|----------|----------|----------|----------|-----------|----------|----------|----------|----------|----------|
| ATSG47090 | ATSG47090 | 165.2576 | 153.4452 | 172.5457 | 197.1346 | 194.1029 | 185.4124 | 190.3109 | 189.8846 | 206.9642 | 170.7973 | 192.8984 | 193.7145 | 0.225906  | 0.18256  | 0.24788  | 0.168038 | 0.170782 | 0.56626  |
| ATSG47100 | CLB9      | 107.0014 | 139.1712 | 128.7654 | 96.50524 | 98.04516 | 86.72515 | 120.056  | 134.8612 | 142.5319 | 162.1211 | 137.0244 | 106.6984 | -0.38819  | 0.07927  | 0.08955  | 0.751685 | 0.125499 | 0.779875 |
| ATSG47110 | LIJ3      | 2598.944 | 2490.807 | 2646.13  | 1517.689 | 1928.442 | 1476.321 | 2143.221 | 1765.064 | 2566.551 | 2318.238 | 2261.568 | 2927.472 | -0.63911  | 0.000183 | -0.25155 | 0.204599 | -0.04233 | 0.922152 |
| ATSG47120 | BI-1      | 642.0081 | 720.8354 | 657.9914 | 3307.573 | 3888.683 | 3043.355 | 2687.475 | 2280.773 | 2977.55  | 529.6637 | 615.9446 | 640.1902 | 2.307791  | 4.97E-62 | 1.946789 | 3.84E-44 | -0.17494 | 0.540008 |
| ATSG47130 | ATSG47130 | 2.377808 | 5.352738 | 2.575309 | 16.49662 | 23.18635 | 25.91786 | 23.12189 | 29.13003 | 35.14486 | 1.919071 | 2.660668 | 4.140326 | 2.072188  | 1.51E-05 | 2.464766 | 2.2E-07  | -0.14988 | NA       |
| ATSG47140 | GATAZ7    | 153.3686 | 157.0137 | 163.5321 | 204.1457 | 215.9643 | 213.3278 | 186.5379 | 168.3068 | 165.9618 | 118.0229 | 122.3907 | 123.2729 | 0.410582  | 0.009518 | 0.13644  | 0.495155 | -0.37553 | 0.133673 |
| ATSG47150 | ATSG47150 | 4.755616 | 0        | 0        | 0.412416 | 0        | 0.996841 | 0.889303 | 2.15778  | 0        | 0        | 0        | 0        | 0.1035907 | -0.50512 | 0.416394 | -0.22835 | 0.749512 | -0.51295 |
| ATSG47160 | ATSG47160 | 20.21137 | 17.84246 | 19.31482 | 14.84696 | 20.53649 | 16.94629 | 16.89677 | 14.02557 | 14.64369 | 19.19071 | 19.95501 | 15.5386  | -0.13534  | 0.780903 | -0.29723 | 0.54563  | -0.07197 | 0.94456  |
| ATSG47170 | ATSG47170 | 1.188904 | 0        | 0        | 2.575309 | 3.293235 | 0.662467 | 3.987363 | 0        | 1.07889  | 1.952492 | 1.919071 | 0        | 0         | 3.10772  | 0.449342 | 0.538335 | -0.15753 | 0.853083 |
| ATSG47175 | LCR3      | 0        | 0        | 0        | 0        | 0        | 0        | 0        | 0        | 0        | 0        | 0        | 0        | #N/A      | #N/A     | #N/A     | #N/A     | #N/A     | #N/A     |
| ATSG47180 | PVAZ1     | 109.3792 | 133.8185 | 122.3272 | 150.5317 | 155.6798 | 172.4535 | 205.4291 | 193.1213 | 141.5557 | 132.4159 | 127.7121 | 71.47755 | 0.376045  | 0.141966 | 0.548113 | 0.030922 | -0.13272 | 0.803834 |
| ATSG47190 | ATSG47190 | 1449.274 | 1700.386 | 1780.826 | 1518.102 | 1489.226 | 1355.703 | 1531.381 | 1477     | 2093.071 | 1794.332 | 1716.131 | 2184.727 | -0.17201  | 0.370805 | 0.048827 | 0.835461 | 0.204997 | 0.493509 |
| ATSG47200 | RABD2B    | 681.242  | 777.9313 | 759.7161 | 1411.699 | 1335.534 | 1389.596 | 1024.478 | 1123.124 | 1259.357 | 772.4262 | 834.1194 | 683.6983 | 0.891053  | 2.3E-13  | 0.613309 | 1.24E-06 | 0.045372 | 0.883453 |
| ATSG47210 | ATSG47210 | 3407.399 | 3263.386 | 3323.346 | 3031.667 | 3066.561 | 2922.737 | 2623.445 | 3019.813 | 4065.088 | 3771.935 | 4634.884 | 3083.984 | -0.14454  | 0.505693 | -0.04109 | 0.874801 | 0.196367 | 0.560244 |
| ATSG47220 | ERF2      | 45.17835 | 60.66437 | 51.50617 | 439.635  | 400.7927 | 427.6447 | 401.9652 | 521.1038 | 834.6903 | 42.21957 | 42.57069 | 40.40035 | 2.870519  | 5.39E-31 | 3.323924 | 1.93E-41 | -0.29844 | 0.591139 |
| ATSG47225 | ATSG47225 | 0        | 0        | 0        | 0        | 0        | 0        | 0        | 0        | 0        | 0        | 0        | 0        | #N/A      | #N/A     | #N/A     | #N/A     | #N/A     | #N/A     |
| ATSG47229 | ATSG47229 | 0        | 0        | 0        | 0        | 0        | 0        | 0        | 0        | 0        | 0        | 0        | 0        | #N/A      | #N/A     | #N/A     | #N/A     | #N/A     | #N/A     |
| ATSG47230 | ERF5      | 28.53369 | 23.1952  | 36.05432 | 74.64722 | 92.74542 | 130.5861 | 257.0087 | 200.6735 | 293.85   | 16.31211 | 33.25835 | 31.0772  | 1.598309  | 6.65E-08 | 2.894864 | 1.24E-24 | -0.15378 | 0.844294 |
| ATSG47240 | NUDTH     | 473.1838 | 537.0581 | 552.4037 | 611.6123 | 700.2279 | 686.8233 | 1713.688 | 1443.555 | 1443.868 | 825.2006 | 1009.723 | 759.1395 | 0.34851   | 0.02643  | 1.536781 | 2.26E-28 | 0.718907 | 2.46E-05 |
| ATSG47250 | ATSG47250 | 98.67903 | 82.07532 | 65.67037 | 59.38784 | 54.98478 | 79.74726 | 72.92289 | 58.26006 | 49.78855 | 59.49121 | 58.53469 | 59.04667 | -0.35018  | 0.202009 | -0.42405 | 0.142122 | -0.4572  | 0.273238 |
| ATSG47260 | ATSG47260 | 0        | 0        | 0        | 0        | 0        | 0        | 0.889303 | 1.07889  | 0        | 0        | 0        | 0        | 0         | NA       | 0.34029  | NA       | 0.182576 | NA       |
| ATSG47280 | ADR1-L3   | 0        | 0        | 0        | 0        | 0        | 0        | 0        | 0        | 0.976246 | 0        | 0        | 0        | 0         | 0        | 0.14122  | NA       | 0.2956   | NA       |
| ATSG47290 | ATSG47290 | 0        | 0        | 0        | 0        | 0        | 0        | 0        | 0        | 0        | 0        | 0        | 0        | #N/A      | #N/A     | #N/A     | #N/A     | #N/A     | #N/A     |
| ATSG47300 | ATSG47300 | 0        | 0        | 0        | 0        | 0        | 0        | 0        | 0        | 0        | 0        | 0        | 0        | #N/A      | #N/A     | #N/A     | #N/A     | #N/A     | #N/A     |
| ATSG47306 | ATSG47306 | 0        | 0        | 0        | 0        | 0        | 0        | 0        | 0        | 0        | 0        | 0        | 0        | #N/A      | #N/A     | #N/A     | #N/A     | #N/A     | #N/A     |
| ATSG47310 | ATSG47310 | 517.1732 | 565.606  | 578.1568 | 525.005  | 636.631  | 520.3509 | 599.3905 | 516.7883 | 561.3414 | 696.6229 | 654.5243 | 604.9694 | 0.019612  | 0.918033 | 0.016435 | 0.934866 | 0.234592 | 0.29285  |
| ATSG47320 | RP519     | 255.6143 | 321.1643 | 310.3247 | 442.9343 | 508.7749 | 459.5436 | 374.3968 | 338.7714 | 529.1253 | 352.1496 | 383.1362 | 340.8132 | 0.658004  | 0.000317 | 0.478734 | 0.014291 | 0.27423  | 0.387595 |
| ATSG47330 | ATSG47330 | 15.45575 | 12.48972 | 11.58889 | 79.59621 | 76.8462  | 81.74094 | 155.6281 | 131.6246 | 139.6032 | 49.89585 | 54.54369 | 45.57989 | 2.3329    | 5.13E-16 | 3.159041 | 3.92E-29 | 1.680897 | 1.6E-06  |
| ATSG47340 | ATSG47340 | 0        | 0        | 0        | 0.824831 | 1.987402 | 0        | 1.778607 | 1.07889  | 0.976246 | 0        | 1.330334 | 0        | 0.508912  | NA       | 0.625717 | NA       | 0.184396 | NA       |
| ATSG47350 | ATSG47350 | 4.755616 | 3.568492 | 6.438272 | 2.474493 | 5.299738 | 6.977885 | 5.572714 | 2.15778  | 5.857476 | 0.959536 | 2.660668 | 7.251346 | -0.05236  | 0.949798 | -0.2317  | 0.777054 | -0.28869 | NA       |
| ATSG47360 | ATSG47360 | 52.31177 | 26.76369 | 32.19136 | 24.33252 | 29.14856 | 24.92102 | 26.6791  | 26.97225 | 28.31113 | 32.62421 | 34.58868 | 42.47217 | -0.50041  | 0.141777 | -0.4363  | 0.246249 | -0.04455 | 0.959697 |
| ATSG47370 | HAT2      | 210.436  | 315.8115 | 235.7765 | 281.2674 | 259.6872 | 222.2955 | 177.8607 | 185.5691 | 292.8738 | 291.6988 | 284.6915 | 210.289  | -0.14371  | 0.559269 | -0.68768 | 0.001173 | -0.10771 | 0.812354 |
| ATSG47380 | ATSG47380 | 102.2457 | 121.3287 | 124.9025 | 105.9908 | 123.2189 | 150.523  | 123.6132 | 116.5201 | 82.98091 | 98.83217 | 137.0244 | 95.3034  | 0.11088   | 0.704872 | -0.10065 | 0.753912 | -0.07646 | 0.893141 |
| ATSG47390 | ATSG47390 | 570.6739 | 547.7635 | 539.5272 | 371.5864 | 413.3796 | 445.5878 | 468.6629 | 406.7415 | 385.6172 | 526.7851 | 623.9266 | 497.2351 | -0.42983  | 0.003055 | -0.38856 | 0.010576 | -0.10202 | 0.977224 |
| ATSG47400 | ATSG47400 | 63.01191 | 48.17464 | 64.38272 | 40.00431 | 50.34751 | 42.86415 | 50.6903  | 53.9445  | 34.16861 | 45.09817 | 67.84703 | 48.68761 | -0.39531  | 0.186649 | -0.33513 | 0.310996 | -0.14054 | 0.821978 |
| ATSG47420 | ATSG47420 | 72.52314 | 82.07532 | 93.99877 | 248.6867 | 197.4152 | 232.2639 | 151.1816 | 122.9935 | 154.2465 | 78.68192 | 75.82904 | 79.7944  | 1.415999  | 5.02E-14 | 0.765514 | 0.000214 | -0.08104 | 0.875455 |
| ATSG47430 | ATSG47430 | 311.4928 | 278.3424 | 267.8321 | 321.6841 | 282.8735 | 272.1375 | 297.0274 | 357.1126 | 292.8738 | 295.537  | 290.0128 | 239.2944 | 0.034523  | 0.871856 | 0.136482 | 0.494026 | -0.05861 | 0.879355 |
| ATSG47435 | PURU1     | 738.3094 | 863.5751 | 866.5914 | 743.1729 | 759.85   | 800.4631 | 899.9751 | 825.3508 | 799.5455 | 973.9287 | 893.9844 | 958.2135 | -0.09841  | 0.47297  | 0.035275 | 0.830103 | 0.197015 | 0.296544 |
| ATSG47440 | ATSG47440 | 34.47821 | 51.74313 | 42.49259 | 14.43455 | 10.59948 | 16.94629 | 32.01493 | 19.42002 | 16.55618 | 58.53167 | 91.79304 | 50.75942 | -1.46266  | 2.61E-05 | -0.81179 | 0.031573 | 0.609743 | 0.243484 |
| ATSG47445 | ATSG47445 | 67.76752 | 96.34929 | 74.68395 | 61.44992 | 68.8966  | 69.77885 | 93.37687 | 69.04896 | 64.43224 | 71.96517 | 94.45371 | 61.11849 | -0.23593  | 0.411421 | -0.04988 | 0.889789 | -0.0621  | 0.922046 |
| ATSG47450 | TIP2-3    | 0        | 0        | 1.287654 | 0        | 0.662467 | 1.993682 | 0.889303 | 0        | 0.959536 | 0        | 0        | 0        | 0.179947  | NA       | 0.07518  | NA       | -0.05481 | NA       |
| ATSG47455 | ATSG47455 | 27.34479 | 26.76369 | 38.62963 | 74.2348  | 83.47088 | 65.79149 | 59.58333 | 48.55005 | 76.14719 | 48.93632 | 71.83803 | 61.11849 | 1.186923  | 2.09E-05 | 0.915482 | 0.002252 | 0.882693 | 0.02266  |
| ATSG47460 | PCMP-E103 | 15.45575 | 17.84246 | 15.45185 | 11.54764 | 13.91181 | 21.9305  | 17.78607 | 21.5778  | 14.64369 | 16.31211 | 17.29434 | 11.39497 | -0.08009  | 0.884042 | 0.136113 | 0.812528 | -0.09877 | 0.927039 |
| ATSG47470 | ATSG47470 | 0        | 0        | 0        | 0.824831 | 0        | 1.324935 | 0        | 1.778607 | 1.07889  | 0.976246 | 0.959536 | 0        | 0.409835  | NA       | 0.647576 | NA       | 0.165624 | NA       |
| ATSG47480 | MAG5      | 693.131  | 604.8594 | 502.1852 | 539.0272 | 441.2032 | 567.2024 | 535.3607 | 650.5706 | 412.9521 | 530.6232 | 521.4909 | 526.2405 | -0.21439  | 0.314036 | -0.16828 | 0.47042  | -0.18542 | 0.603047 |
| ATSG47490 | SEC16B    | 208.0582 | 160.5821 | 155.8062 | 110.115  | 77.50867 | 118.6241 | 139.6206 | 139.1768 | 78.09968 | 128.5778 | 147.6671 | 157.4578 | -0.75072  | 0.002718 | -0.53559 | 0.04786  | -0.26749 | 0.563232 |
| ATSG47500 | PME68     | 214.0027 | 173.0719 | 220.1898 | 321.2177 | 245.7754 | 259.1786 | 247.2264 | 269.7225 | 293.2967 | 247.5602 | 203.5411 | 309.7361 | 0.429644  | 0.04765  | 0.212065 | 0.404719 | 0.313183 | 0.374513 |
| ATSG47510 | SFH1      | 32.10041 | 26.76369 | 30.9037  | 45.77813 | 41.07297 | 43.86099 | 44.65179 | 33.44559 | 34.4559  | 38.3111  | 43.1791  | 35.91902 | 0.498281  | 0.140813 | 0.218216 | 0.599642 | 0.157923 | 0.833784 |
| ATSG47520 | RABA5A    | 135.535  | 158.7979 | 151.9432 | 158.3676 | 155.6798 | 145.5388 | 115.6095 | 114.3623 | 166.9381 | 119.942  | 130.3727 | 134.6678 | 0.051052  | 0.880347 | -0.15912 | 0.516074 | -0.20373 | 0.884791 |
| ATSG47530 | ATSG47530 | 1.188904 | 0        | 0        | 0.412416 | 0.662467 | 0.996841 | 0        | 2.15778  | 0        | 0        | 0        | 0        | 0.134646  | NA       | 0.131873 | NA       | -0.24822 | NA       |
| ATSG47540 | ATSG47540 | 325.7597 | 321.1643 | 305.1741 | 202.496  | 225.9013 | 198.3713 | 211.6542 | 180.1746 | 140.5794 | 261.9532 | 268.7275 | 308.7001 | -0.59039  | 0.000423 | -0.18939 | 0.000243 | -0.17725 | 0.575777 |
| ATSG47550 | CYS5      | 29.7226  | 42.8219  | 51.50617 | 39.17948 | 23.18635 | 23.92418 | 24.81447 | 30.26363 | 45.09817 | 31.92802 | 38.32854 | 0        | -0.44299  | 0.223311 | -0.62038 | 0.101069 | -0.07892 | 0.926068 |
| ATSG47560 | TD1       | 901.1892 | 922.4552 | 806.0716 | 657.8028 | 606.82   | 710.7475 | 329.0423 | 354.9548 | 298.7313 | 556.5307 | 478.9022 | 466.1579 | -0.40844  | 0.002111 |          |          |          |          |

|           |           |          |          |          |          |          |          |          |          |           |          |          |          |           |          |           |          |           |          |   |
|-----------|-----------|----------|----------|----------|----------|----------|----------|----------|----------|-----------|----------|----------|----------|-----------|----------|-----------|----------|-----------|----------|---|
| ATSG48050 | ATSG48050 | 9.511232 | 5.352738 | 2.575309 | 0.412461 | 1.324935 | 0        | 3.557214 | 0        | 0         | 3.888143 | 5.321336 | 4.143626 | -1.59414  | 0.011563 | -1.18738  | 0.079154 | -0.25753  | NA       |   |
| ATSG48060 | ATSG48060 | 27.34479 | 10.70548 | 36.05432 | 4.949887 | 5.962205 | 5.981045 | 7.114428 | 10.7889  | 2.928738  | 21.10978 | 18.62468 | 16.5745  | -1.8252   | 0.00005  | -1.56181  | 0.000998 | -0.37165  | NA       |   |
| ATSG48070 | XTH20     | 0        | 0        | 0        | 0        | 0        | 0        | 0.889303 | 0        | 0         | 0        | 0        | 0        | 0         | 0        | 0.160764  | NA       | 0         | NA       |   |
| ATSG48090 | ELP1      | 3.566712 | 1.784246 | 5.150617 | 2.886909 | 4.637271 | 2.990522 | 9.782338 | 3.23667  | 2.928738  | 6.716749 | 5.321336 | 4.143626 | -0.06123  | 0.941148 | 0.380318  | 0.616201 | 0.376069  | NA       |   |
| ATSG48100 | TT10      | 0        | 0        | 0        | 0        | 0        | 0        | 0        | 0        | 0         | 0        | 0        | 0        | #N/A      | #N/A     | #N/A      | #N/A     | #N/A      | #N/A     |   |
| ATSG48110 | ATSG48110 | 0        | 0        | 0        | 0.824831 | 0.662467 | 0.996841 | 0        | 1.07889  | 0.976246  | 0        | 1.330334 | 1.035907 | 0.459719  | NA       | 0.354938  | NA       | 0.397358  | NA       |   |
| ATSG48120 | ATSG48120 | 309.115  | 303.3218 | 269.1198 | 167.4407 | 186.1533 | 241.2355 | 335.2674 | 275.1169 | 189.3917  | 210.1383 | 232.8084 | 232.0431 | -0.55864  | 0.011093 | -0.13405  | 0.631718 | -0.37341  | 0.28571  |   |
| ATSG48130 | ATSG48130 | 0        | 0        | 0        | 0        | 1.324935 | 0.996841 | 0        | 0        | 0.995936  | 0        | 0        | 0        | 0.378842  | NA       | 0         | NA       | 0.162793  | NA       |   |
| ATSG48140 | ATSG48140 | 0        | 0        | 0        | 0        | 0        | 0        | 1.778607 | 0        | 0         | 0        | 0        | 0        | 0         | 0        | 0.264566  | NA       | 0.174671  | NA       |   |
| ATSG48150 | PAT1      | 485.0728 | 496.0204 | 10.7617  | 301.0634 | 258.3622 | 285.0965 | 236.5547 | 293.4581 | 222.5841  | 320.4849 | 339.2352 | 358.4237 | -0.70563  | 2.02E-06 | -0.87329  | 6.39E-09 | -0.44229  | 0.03257  |   |
| ATSG48160 | OBE2      | 1281.638 | 1248.972 | 967.0284 | 1050.422 | 1011.588 | 1166.304 | 1296.604 | 1398.241 | 1449.725  | 1029.582 | 1098.856 | 994.4703 | -0.1147   | 0.476886 | 0.242582  | 0.109001 | -0.16126  | 0.516907 |   |
| ATSG48170 | SNE       | 7.133424 | 8.92123  | 7.725926 | 5.361402 | 13.24935 | 10.96525 | 8.003731 | 4.31556  | 8.786214  | 8.635821 | 5.321336 | 11.39497 | 0.228299  | 0.724503 | -0.11443  | 0.879124 | 0.098828  | NA       |   |
| ATSG48175 | ATSG48175 | 0        | 0        | 0        | 1.237247 | 0        | 0        | 0.889303 | 0        | 0         | 0        | 0        | 0        | 0.195643  | NA       | 0.123195  | NA       | 0         | NA       |   |
| ATSG48180 | NSP5      | 438.7056 | 431.7875 | 365.6938 | 623.5723 | 637.2935 | 744.6401 | 550.4789 | 686.174  | 755.6144  | 321.4444 | 238.1298 | 296.2693 | 0.683423  | 4.71E-05 | 0.675386  | 0.000077 | -0.51318  | 0.028715 |   |
| ATSG48190 | ATSG48190 | 4.755616 | 1.784246 | 1.287654 | 2.474493 | 1.324935 | 1.993682 | 0.889303 | 0        | 0.995936  | 1.330334 | 2.071813 | 0        | -0.19106  | 0.813804 | -0.99275  | 0.14482  | -0.41566  | NA       |   |
| ATSG48200 | ATSG48200 | 0        | 0        | 1.287654 | 0        | 0        | 0        | 0        | 0        | 0         | 0        | 0        | 0        | -0.2184   | NA       | -0.20558  | NA       | -0.19918  | NA       |   |
| ATSG48205 | ATSG48205 | 0        | 0        | 0        | 0        | 0        | 0        | 0.889303 | 0        | 0         | 0        | 0        | 0        | 0         | 0        | 0.160764  | NA       | 0         | NA       |   |
| ATSG48210 | ATSG48210 | 2.377808 | 0        | 0        | 0        | 0.662467 | 0        | 0.889303 | 0        | 0         | 2.878607 | 1.330334 | 4.143626 | -0.42529  | 0.520793 | -0.30004  | 0.673728 | 0.715811  | NA       |   |
| ATSG48220 | ATSG48220 | 483.8839 | 515.6471 | 533.0889 | 446.2337 | 425.9665 | 400.73   | 427.755  | 439.1082 | 466.6456  | 558.4497 | 504.1966 | 546.9586 | -0.25988  | 0.036541 | -0.19805  | 0.146945 | 0.073366  | 0.775068 |   |
| ATSG48230 | AAT1      | 485.0728 | 472.8252 | 592.321  | 325.8083 | 319.3092 | 323.9733 | 271.2376 | 301.0103 | 315.3275  | 556.5307 | 450.9832 | 560.4254 | -0.67017  | 2.91E-06 | -0.79577  | 4.18E-08 | -0.16226  | 0.965774 |   |
| ATSG48240 | ATSG48240 | 175.9578 | 151.6609 | 222.7642 | 237.139  | 263.662  | 215.3176 | 232.9975 | 193.1213 | 246.014   | 183.2713 | 204.8714 | 199.93   | 0.365955  | 0.054124 | 0.274768  | 0.190439 | 0.082102  | 0.849621 |   |
| ATSG48250 | COL10     | 52.31177 | 80.29107 | 90.1358  | 315.9103 | 320.6342 | 419.67   | 1004.024 | 1008.762 | 966.4835  | 106.5085 | 121.0604 | 124.3088 | 2.178124  | 4.38E-31 | 3.655102  | 3.05E-88 | 0.635094  | 0.025782 |   |
| ATSG48270 | ATSG48270 | 0        | 0        | 0        | 0        | 0        | 0        | 0        | 0        | 0         | 0        | 0        | 0        | #N/A      | #N/A     | #N/A      | #N/A     | #N/A      | #N/A     |   |
| ATSG48280 | ATSG48280 | 0        | 0        | 0        | 0        | 0        | 0        | 0.889303 | 0        | 0         | 0        | 0        | 0        | 0         | 0        | 0.160764  | NA       | 0         | NA       |   |
| ATSG48290 | ATSG48290 | 0        | 1.784246 | 2.575309 | 9.897974 | 7.28714  | 4.984204 | 5.39445  | 11.71495 | 1.919071  | 1.330334 | 1.035907 | 0        | 1.428795  | 0.018278 | 1.470723  | 0.01865  | -0.04389  | NA       |   |
| ATSG48300 | AP51      | 2085.338 | 1866.321 | 1809.154 | 1408.399 | 1212.315 | 1243.06  | 1430     | 1708.962 | 1389.198  | 2088.909 | 2156.471 | 2012.766 | -0.56944  | 3.05E-06 | -0.3449   | 0.008448 | 0.117446  | 0.623916 |   |
| ATSG48310 | ATSG48310 | 78.46766 | 78.50683 | 56.65679 | 69.28582 | 58.95959 | 63.79781 | 71.14428 | 83.07453 | 55.64602  | 98.83217 | 98.44471 | 87.01615 | -0.137467 | 0.635932 | -0.02258  | 0.948781 | 0.402396  | 0.293372 |   |
| ATSG48320 | ATSG48320 | 29.72226 | 19.62671 | 23.17778 | 11.13522 | 9.937009 | 19.93682 | 14.22886 | 25.89336 | 11.71495  | 38.38143 | 15.96401 | 41.43626 | -0.76791  | 0.087464 | -0.44221  | 0.389978 | 0.363626  | 0.651908 |   |
| ATSG48330 | ATSG48330 | 73.71204 | 76.72258 | 72.10864 | 85.37002 | 70.7757  | 53.35821 | 67.97007 | 86.85897 | 67.16749  | 93.12338 | 51.79533 | 0        | 0.196941  | 0.530067 | -0.09215  | 0.806537 | -0.0772   | 0.907455 |   |
| ATSG48335 | ATSG48335 | 117.7015 | 137.3869 | 162.2444 | 185.1746 | 232.526  | 187.4061 | 135.1741 | 173.7013 | 270.421   | 158.3234 | 103.766  | 150.2064 | 0.512061  | 0.062051 | 0.450431  | 0.123899 | -0.1014   | 0.989837 |   |
| ATSG48340 | ATSG48340 | 122.4571 | 160.5821 | 149.3679 | 136.5096 | 145.7428 | 166.4724 | 151.1816 | 112.2046 | 152.2944  | 137.2136 | 131.7031 | 142.9551 | 0.052075  | 0.836458 | -0.04207  | 0.88066  | -0.05747  | 0.903861 |   |
| ATSG48350 | ATSG48350 | 1.188904 | 0        | 1.287654 | 1.237247 | 0.662467 | 0        | 0.889303 | 0        | 0.995936  | 0        | 4.143626 | 0        | -0.0931   | 0.902437 | -0.29119  | 0.679194 | 0.346576  | NA       |   |
| ATSG48360 | FH9       | 395.905  | 253.3629 | 266.5444 | 155.8931 | 191.453  | 176.4408 | 184.9751 | 158.5968 | 142.5319  | 260.0342 | 295.3341 | 314.9584 | -0.79467  | 5.45E-05 | -0.8933   | 8.44E-06 | -0.07905  | 0.868158 |   |
| ATSG48370 | ATSG48370 | 114.1348 | 128.4657 | 113.3136 | 104.3411 | 104.0074 | 84.73147 | 130.7276 | 112.2046 | 140.5794  | 106.5085 | 142.3457 | 106.9166 | -0.25464  | 0.256797 | -0.113615 | 0.668716 | -0.00557  | 0.992712 |   |
| ATSG48375 | TG3       | 0        | 0        | 0        | 0.662467 | 0.996841 | 0.889303 | 0        | 0        | 0         | 0        | 0        | 0        | 0.275488  | NA       | 0.154887  | NA       | 0         | NA       |   |
| ATSG48380 | BIR1      | 608.7188 | 553.1163 | 454.542  | 1246.32  | 1171.905 | 1488.283 | 1298.383 | 1434.924 | 1184.186  | 325.2826 | 336.5745 | 379.1418 | 1.25098   | 1.91E-17 | 1.256046  | 1.81E-17 | -0.6226   | 0.001472 |   |
| ATSG48385 | FLR3      | 863.1443 | 795.7737 | 724.9494 | 1023.203 | 906.2552 | 1013.787 | 1035.149 | 1136.071 | 1184.1892 | 671.6749 | 719.7107 | 706.4883 | 0.299427  | 0.052949 | 0.319181  | 0.045249 | -0.18262  | 0.494969 |   |
| ATSG48390 | ZIP4      | 2.377808 | 1.784246 | 5.150617 | 2.886909 | 5.299738 | 0.996841 | 2.66791  | 3.23667  | 0         | 1.919071 | 2.660668 | 3.10772  | 0.018456  | 0.982959 | -0.36179  | 0.653378 | -0.16741  | NA       |   |
| ATSG48400 | GLR1.2    | 8.322328 | 0        | 2.575309 | 35.46774 | 26.49869 | 48.8452  | 72.92258 | 80.91675 | 36.1211   | 8.388143 | 6.660668 | 2.071813 | 2.476384  | 7.69E-08 | 1.395548  | 1.55E-12 | -0.31114  | 0.789872 |   |
| ATSG48410 | GLR1.3    | 2.377808 | 3.568492 | 9.01358  | 20.20836 | 22.52389 | 28.90838 | 25.7898  | 20.49891 | 15.61994  | 1.919071 | 6.65167  | 4.143626 | 1.801043  | 0.000127 | 1.619503  | 0.000979 | -0.23645  | NA       |   |
| ATSG48412 | ATSG48412 | 425.6276 | 431.7875 | 415.9124 | 294.8771 | 435.9035 | 319.8959 | 416.194  | 378.904  | 648.2723  | 477.8487 | 516.1696 | 429.9012 | -0.26886  | 0.268275 | 0.175595  | 0.5155   | -0.155635 | 0.725981 |   |
| ATSG48420 | ATSG48420 | 0        | 0        | 0        | 0        | 0        | 0        | 0        | 0        | 0         | 1.919071 | 0        | 0        | 0         | 0        | 0         | 0        | 0         | 0        | 0 |
| ATSG48430 | ATSG48430 | 0        | 0        | 1.287654 | 1.237247 | 1.987402 | 1.993682 | 0        | 2.15778  | 2.928738  | 0        | 0        | 1.035907 | 0.559457  | 0.402079 | 0.565777  | 0.459428 | -0.08041  | NA       |   |
| ATSG48440 | ATSG48440 | 145.0463 | 212.3253 | 162.2444 | 284.9792 | 322.6216 | 283.1028 | 174.3035 | 187.7268 | 193.2967  | 139.1327 | 118.3997 | 109.8061 | 0.779237  | 5.58E-06 | 0.108254  | 0.649786 | -0.46885  | 0.082058 |   |
| ATSG48450 | sk3       | 85.60108 | 83.85956 | 90.1358  | 68.46099 | 47.69764 | 70.7757  | 49.80099 | 66.89118 | 41.00233  | 54.69353 | 58.57969 | 67.62118 | -0.45185  | 0.125488 | -0.68607  | 0.022018 | -0.57485  | 0.184358 |   |
| ATSG48460 | FIM2      | 535.0068 | 453.1985 | 500.8975 | 208.6283 | 195.4278 | 262.1691 | 228.551  | 242.7502 | 173.7718  | 587.2358 | 611.9536 | 604.9694 | -1.1514   | 1.35E-13 | -1.18766  | 7.63E-14 | 0.269495  | 0.305516 |   |
| ATSG48465 | ATSG48465 | 0        | 0        | 0        | 0        | 0        | 0        | 0.889303 | 0        | 0         | 0        | 0        | 0        | 0         | 0        | 0.160764  | NA       | 0         | NA       |   |
| ATSG48470 | ATSG48470 | 208.0582 | 183.7773 | 200.8741 | 275.906  | 259.0247 | 250.207  | 255.201  | 294.537  | 310.4462  | 247.5602 | 230.1478 | 215.4686 | 0.397704  | 0.010738 | 0.521466  | 0.000847 | 0.217126  | 0.426928 |   |
| ATSG48480 | ATSG48480 | 286.5259 | 281.9109 | 334.7901 | 392.6196 | 453.7901 | 389.7647 | 265.0124 | 290.2214 | 446.1444  | 320.4849 | 248.7725 | 298.3411 | 0.439092  | 0.039521 | 0.142685  | 0.588171 | -0.05499  | 0.915717 |   |
| ATSG48485 | DIR1      | 152.1797 | 132.0342 | 158.3815 | 214.0437 | 182.841  | 117.6272 | 115.6095 | 100.3368 | 179.6239  | 209.1788 | 484.2416 | 219.6122 | 0.20451   | 0.603164 | -0.15208  | 0.727523 | 0.963843  | 0.021612 |   |
| ATSG48490 | ATSG48490 | 187.8468 | 208.7568 | 234.3531 | 311.973  | 338.4557 | 95.69671 | 72.03358 | 56.10228 | 199.3396  | 280.1844 | 605.302  | 384.3213 | -0.73417  | 0.012119 | -0.31963  | 4.03E-06 | 0.954771  | 0.006741 |   |
| ATSG48500 | ATSG48500 | 48.74506 | 33.90067 | 33.47901 | 56.08852 | 49.68505 | 51.83572 | 46.24378 | 47.47116 | 67.36097  | 47.97678 | 55.87403 | 54.90305 | 0.404222  | 0.178411 | 0.427933  | 0.18182  | 0.40348   | 0.406255 |   |
| ATSG48510 | ATSG48510 | 0        | 0        | 0        | 0.824831 | 0        | 0        | 0.889303 | 0        | 0         | 0        | 0        | 0        | 0.173038  | NA       | 0         | NA       | 0         | NA       |   |
| ATSG48515 | ATSG48515 | 0        | 0        | 0        | 0        | 0        | 0        | 0        | 0        | 0         | 0        | 0        | 0        | #N/A      | #N/A     | #N/A      | #N/A     | #N/A      | #N/A     |   |
| ATSG48520 | ATSG48520 | 175.9578 | 178.4246 | 169.9704 | 160.8421 | 122.5564 | 131.583  | 167.1891 | 122.9935 | 124.9595  | 203.4216 | 251.4331 | 182.3195 | -0.31903  | 0.14     |           |          |           |          |   |

|           |           |          |          |          |          |          |          |          |          |          |          |          |           |           |           |           |          |          |          |
|-----------|-----------|----------|----------|----------|----------|----------|----------|----------|----------|----------|----------|----------|-----------|-----------|-----------|-----------|----------|----------|----------|
| ATSG48920 | TED7      | 8.322328 | 14.27397 | 12.87654 | 8.660727 | 11.26194 | 8.971567 | 6.225124 | 7.55223  | 5.857476 | 16.31211 | 11.97301 | 22.78994  | -0.22998  | 0.686269  | -0.66813  | 0.229553 | 0.497949 | NA       |
| ATSG48930 | HST       | 1889.168 | 1711.092 | 1564.5   | 752.246  | 658.4925 | 721.7127 | 698.1032 | 759.5385 | 692.1584 | 1260.275 | 1195.97  | 1278.309  | -1.26435  | 8.18E-32  | -1.25406  | 1.17E-30 | -0.46739 | 0.000633 |
| ATSG48940 | RCH1      | 0        | 1.784246 | 3.862963 | 1.237247 | 4.637271 | 0        | 2.66791  | 2.15778  | 0        | 0.635821 | 7.982004 | 0         | 0.01499   | 0.986558  | -0.0877   | 0.920143 | 0.715527 | NA       |
| ATSG48945 | LCR46     | 0        | 0        | 0        | 0        | 0        | 0        | 0        | 0        | 0        | 0.959536 | 0        | 0         | 0         | NA        | 0         | NA       | 0.171512 | NA       |
| ATSG48950 | DHNA72    | 3.566712 | 7.136984 | 5.150617 | 4.124156 | 4.637271 | 0.996841 | 4.446517 | 2.15778  | 3.904984 | 1.919071 | 2.660668 | 1.035907  | -0.36421  | 0.614669  | -0.3421   | 0.661858 | -0.85653 | NA       |
| ATSG48955 | LCR86     | 0        | 0        | 0        | 0        | 0        | 0        | 0.889303 | 0        | 0.976246 | 0        | 0        | 0         | 0         | NA        | 0.309898  | NA       | 0        | NA       |
| ATSG48960 | ATSG48960 | 212.8138 | 203.404  | 242.079  | 273.4315 | 224.5764 | 241.2355 | 300.5846 | 318.2725 | 242.109  | 218.7741 | 184.9164 | 216.5045  | 0.164891  | 0.404757  | 0.375695  | 0.402221 | -0.08356 | 0.836222 |
| ATSG48965 | ATSG48965 | 77.27876 | 74.93833 | 54.08148 | 64.33683 | 52.99738 | 59.81045 | 79.14801 | 56.10228 | 43.93107 | 62.36982 | 65.18636 | 63.1903   | -0.20116  | 0.156726  | -0.16314  | 0.590261 | -0.10474 | 0.866988 |
| ATSG48970 | ATSG48970 | 142.6685 | 137.3869 | 115.8889 | 156.3055 | 141.1055 | 164.4787 | 131.6169 | 104.6523 | 139.6032 | 107.468  | 83.81104 | 129.4883  | 0.216091  | 0.349291  | -0.06848  | 0.813771 | -0.28378 | 0.443857 |
| ATSG48980 | ATSG48980 | 1.188904 | 0        | 0        | 2.886909 | 1.987402 | 1.993682 | 1.778607 | 3.23667  | 1.952492 | 1.919071 | 0        | 3.10772   | 0.759425  | 0.264786  | 0.721782  | 0.312675 | 0.525544 | NA       |
| ATSG48990 | ATSG48990 | 70.14533 | 44.60615 | 52.79383 | 57.32576 | 52.33491 | 50.83888 | 48.91169 | 55.02339 | 55.64602 | 37.42189 | 38.57969 | 61.11849  | -0.06913  | 0.845661  | -0.08678  | 0.820088 | -0.28645 | 0.587439 |
| ATSG49000 | ATSG49000 | 40.42273 | 46.3904  | 41.20494 | 42.06639 | 43.72284 | 40.87047 | 30.23632 | 29.13003 | 30.26363 | 22.06932 | 34.58868 | 33.14901  | 0.000399  | 0.999566  | -0.47347  | 0.157804 | -0.48645 | 0.321717 |
| ATSG49010 | SD5       | 40.42273 | 32.11643 | 29.61605 | 47.01538 | 47.03518 | 53.8294  | 30.23632 | 43.1556  | 41.97858 | 63.23935 | 59.86503 | 60.08258  | 0.482267  | 0.101834  | 0.143272  | 0.710701 | 0.789761 | 0.035935 |
| ATSG49015 | ATSG49015 | 59.4452  | 76.72258 | 81.12222 | 169.0904 | 156.3423 | 127.5956 | 210.7649 | 168.3068 | 232.3465 | 85.20066 | 159.6401 | 90.12387  | 0.1016923 | 0.906E-05 | 1.426544  | 1.95E-08 | 0.567992 | 0.165154 |
| ATSG49020 | PRMT14    | 252.0476 | 210.541  | 224.0519 | 232.6024 | 245.1129 | 223.2923 | 230.3296 | 238.4347 | 191.3442 | 254.2769 | 301.9858 | 250.6894  | 0.025164  | 0.908539  | -0.026251 | 0.780235 | 0.348371 | 0.437269 |
| ATSG49030 | OVA2      | 1119.948 | 1109.801 | 1024.973 | 567.0714 | 554.4851 | 539.2909 | 871.5174 | 942.9498 | 741.947  | 974.8882 | 909.9484 | 1235.836  | -0.95514  | 1.19E-11  | -0.3434   | 0.030073 | -0.05834 | 0.866179 |
| ATSG49040 | DIR3      | 0        | 1.784246 | 0        | 0        | 0        | 0        | 0        | 0        | 0        | 0        | 0        | 0         | -0.2184   | NA        | -0.20558  | NA       | -0.19918 | NA       |
| ATSG49050 | ATSG49050 | 0        | 0        | 0        | 0        | 0        | 0        | 0        | 0        | 0        | 0        | 0        | 0         | #N/A      | #N/A      | #N/A      | #N/A     | #N/A     | #N/A     |
| ATSG49060 | ATJ49     | 83.22328 | 99.91778 | 86.27284 | 118.3633 | 131.831  | 119.6209 | 111.1629 | 103.5734 | 120.0783 | 93.07496 | 95.78405 | 100.4829  | 0.456687  | 0.020101  | 0.31761   | 0.153265 | 0.110459 | 0.802071 |
| ATSG49070 | KCS20     | 8.322328 | 1.784246 | 10.30123 | 3.299255 | 4.637271 | 5.981045 | 2.66791  | 3.23667  | 1.952492 | 7.676285 | 2.660668 | 10.35907  | -0.47253  | 0.147789  | -0.93775  | 0.153218 | 0.006685 | NA       |
| ATSG49080 | ATSG49080 | 0        | 0        | 0        | 0.824831 | 0        | 0        | 2.66791  | 0        | 0        | 0.959536 | 0        | 1.035907  | 0.119722  | NA        | 0.401768  | NA       | 0.301745 | NA       |
| ATSG49090 | ATSG49090 | 0        | 0        | 0        | 0        | 0        | 0        | 0        | 0        | 0        | 0        | 0        | 0         | #N/A      | #N/A      | #N/A      | #N/A     | #N/A     | #N/A     |
| ATSG49100 | ATSG49100 | 353.1045 | 312.2431 | 338.6531 | 249.5114 | 249.7502 | 233.2607 | 173.4142 | 196.358  | 181.5818 | 326.2421 | 268.7275 | 323.2028  | -0.44934  | 0.001598  | -0.8582   | 1.71E-09 | -0.12603 | 0.652681 |
| ATSG49110 | ATSG49110 | 17.34479 | 26.76369 | 34.76667 | 25.56977 | 31.79843 | 23.92418 | 32.90423 | 45.31338 | 21.47741 | 24.94793 | 31.92802 | 32.1131   | -0.1216   | 0.781108  | 0.140459  | 0.762039 | -0.01071 | 0.991568 |
| ATSG49120 | ATSG49120 | 14.26685 | 23.1952  | 19.31482 | 16.90904 | 17.88662 | 7.974726 | 8.893035 | 5.39445  | 5.857476 | 24.94793 | 22.61568 | 24.86176  | -0.28659  | 0.556815  | -1.20221  | 0.009881 | 0.218371 | 0.659653 |
| ATSG49130 | ATSG49130 | 0        | 0        | 0        | 0        | 0        | 0        | 0        | 0        | 0        | 0        | 0        | 0         | #N/A      | #N/A      | #N/A      | #N/A     | #N/A     | #N/A     |
| ATSG49138 | ATSG49138 | 0        | 0        | 0        | 0        | 0        | 0        | 0        | 0        | 0        | 0        | 0        | 0         | #N/A      | #N/A      | #N/A      | #N/A     | #N/A     | #N/A     |
| ATSG49140 | ATSG49140 | 0        | 0        | 0        | 0        | 0        | 0.996841 | 0.889303 | 0        | 1.952492 | 0        | 0        | 0         | 0.130704  | NA        | 0.457031  | NA       | 0        | NA       |
| ATSG49150 | GEX2      | 0        | 0        | 0        | 0        | 0        | 0        | 0        | 0        | 0        | 0        | 0        | 0         | #N/A      | #N/A      | #N/A      | #N/A     | #N/A     | #N/A     |
| ATSG49152 | ATSG49152 | 1.188904 | 0        | 6.438272 | 8.248311 | 6.624673 | 5.981045 | 3.557214 | 4.31556  | 4.88123  | 5.757214 | 9.312338 | 4.143626  | 0.901712  | 0.146534  | 0.350764  | 0.64778  | 0.749519 | NA       |
| ATSG49160 | DMT1      | 355.4823 | 226.5992 | 251.0926 | 131.973  | 107.3197 | 155.5072 | 111.1629 | 132.7035 | 92.74337 | 267.7104 | 239.4601 | 275.5511  | -1.05767  | 0.352107  | -1.27342  | 1.69E-09 | -0.09214 | 0.852370 |
| ATSG49170 | ATSG49170 | 51.12287 | 35.68492 | 61.80741 | 25.15735 | 23.84882 | 15.94945 | 2.66791  | 9.710009 | 14.64369 | 54.69353 | 30.59768 | 53.86714  | -1.0804   | 0.001735  | -1.50234  | 3.32E-05 | -0.08531 | 0.920201 |
| ATSG49180 | PMES8     | 1.188904 | 0        | 0        | 0        | 0        | 0        | 0        | 0        | 0        | 0        | 1.330334 | 0         | -0.22006  | NA        | -0.20393  | NA       | 0.001199 | NA       |
| ATSG49190 | SU52      | 13.07794 | 12.48972 | 12.87654 | 13.60971 | 9.274542 | 20.93366 | 18.67537 | 17.26224 | 7.809968 | 13.4335  | 13.30334 | 6.215439  | 0.128836  | 0.830839  | 0.156163  | 0.80925  | -0.19204 | NA       |
| ATSG49200 | ZFW04     | 0        | 1.784246 | 1.287654 | 3.299325 | 5.299738 | 2.990522 | 2.66791  | 4.31556  | 3.904984 | 0        | 0        | 0.2071813 | 0.975558  | 0.141599  | 0.871049  | 0.21814  | -0.15105 | NA       |
| ATSG49210 | ATSG49210 | 155.7464 | 185.5616 | 172.5457 | 204.5581 | 219.9391 | 188.4029 | 159.1853 | 143.4924 | 261.6339 | 206.3002 | 202.2108 | 195.7863  | 0.252362  | 0.304192  | 0.135496  | 0.636219 | 0.230315 | 0.575245 |
| ATSG49215 | ATSG49215 | 247.292  | 196.2671 | 213.7506 | 84.54519 | 90.09555 | 100.6809 | 94.26617 | 86.3112  | 72.2422  | 162.1615 | 147.6671 | 183.3555  | -1.24592  | 8.9E-13   | -1.34909  | 1.37E-13 | -0.40816 | 0.131817 |
| ATSG49220 | ATSG49220 | 222.325  | 183.7773 | 226.6272 | 207.8574 | 275.5864 | 192.3903 | 224.1045 | 204.9891 | 216.7266 | 228.3635 | 222.1658 | 228.9353  | 0.08894   | 0.687592  | 0.022668  | 0.930797 | 0.09411  | 0.811658 |
| ATSG49230 | DI19-7    | 82.03437 | 110.6233 | 81.12222 | 123.3123 | 90.09555 | 104.6683 | 71.14428 | 72.28563 | 78.09968 | 98.83217 | 70.5077  | 89.08796  | 0.234348  | 0.36088   | -0.27881  | 0.314675 | -0.05425 | 0.927039 |
| ATSG49240 | APRR4     | 0        | 0        | 0        | 0        | 0        | 0        | 0.889303 | 0        | 0.959536 | 0        | 0        | 0         | 0         | NA        | 0.13694   | NA       | 0.147196 | NA       |
| ATSG49250 | ATSG49250 | 0        | 1.784246 | 0        | 0        | 0        | 0        | 0        | 0        | 1.919071 | 0        | 0        | 4.143626  | -0.35176  | NA        | -0.29435  | NA       | 0.624895 | NA       |
| ATSG49260 | ATSG49260 | 0        | 0        | 0        | 0.412416 | 0        | 0        | 1.07889  | 0.976246 | 0        | 0        | 0        | 0         | 0.073354  | NA        | 0.349909  | NA       | 0        | NA       |
| ATSG49270 | COB19     | 0        | 0        | 0        | 0        | 0        | 0        | 0        | 0        | 0        | 0        | 0        | 0         | 0.324012  | 0.45054   | 0.324172  | 0.45054  | 0.136575 | 0.850251 |
| ATSG49280 | ATSG49280 | 61.82301 | 49.95889 | 50.21852 | 65.57408 | 60.28452 | 73.76622 | 53.35821 | 70.12785 | 83.95716 | 54.69353 | 91.79304 | 36.25673  | -1.03339  | 0.007597  | -0.67086  | 0.118352 | -0.75765 | 0.212111 |
| ATSG49290 | ATRLP56   | 23.77808 | 33.90067 | 34.76667 | 13.60971 | 11.26194 | 16.94629 | 21.34328 | 20.49891 | 12.6912  | 12.47396 | 13.30334 | 24.86176  | 0.262482  | 0.554878  | 0.240555  | 0.603012 | 0.38751  | 0.581757 |
| ATSG49300 | GATA16    | 28.53369 | 17.84246 | 33.47901 | 29.69392 | 25.83622 | 45.84568 | 13.12562 | 22.65669 | 43.93107 | 42.21957 | 45.23135 | 22.78994  | 0.096565  | 0.899174  | 0.758392  | 0.236949 | -0.06676 | NA       |
| ATSG49301 | ATSG49301 | 1.188904 | 0        | 0        | 0        | 1.324935 | 0.996841 | 1.778607 | 0        | 0.31556  | 0.976246 | 0        | 1.035907  | 0.096565  | 0.899174  | 0.758392  | 0.236949 | -0.06676 | NA       |
| ATSG49310 | IMPAS     | 1.188904 | 0        | 0        | 0.824831 | 0        | 0        | 1.778607 | 0        | 0        | 0        | 0        | 2.660668  | -0.0696   | NA        | 0.07412   | NA       | 0.151536 | NA       |
| ATSG49320 | ATSG49320 | 9.511232 | 7.136984 | 3.862963 | 3.71174  | 10.59948 | 1.993682 | 3.557214 | 5.39445  | 2.928738 | 9.595356 | 10.64267 | 4.143626  | -0.21898  | 0.763728  | -0.53791  | 0.446685 | 0.176501 | NA       |
| ATSG49330 | MYB111    | 14.26685 | 16.05821 | 14.1642  | 16.08421 | 21.86142 | 18.93997 | 14.22886 | 10.7889  | 10.73871 | 12.47396 | 19.95501 | 12.43088  | 0.317874  | 0.503157  | -0.25892  | 0.639417 | -0.00537 | NA       |
| ATSG49334 | ATSG49334 | 0        | 0        | 0        | 0        | 0        | 0        | 0        | 0        | 0        | 0        | 0        | 0         | #N/A      | #N/A      | #N/A      | #N/A     | #N/A     | #N/A     |
| ATSG49340 | TBL4      | 0        | 0        | 0        | 0        | 0        | 0        | 0        | 0        | 0        | 1.919071 | 0        | 0         | 0         | NA        | 0         | NA       | 0.256851 | NA       |
| ATSG49350 | ATSG49350 | 0        | 1.784246 | 0        | 0.412416 | 1.987402 | 1.993682 | 0        | 0        | 0.976246 | 0        | 0        | 1.035907  | 0.444776  | NA        | -0.11351  | NA       | -0.08755 | NA       |
| ATSG49360 | BX11      | 2552.577 | 2551.472 | 2002.303 | 1369.632 | 1232.189 | 1789.329 | 1574.067 | 2103.835 | 1561.017 | 1966.089 | 2329.415 | 1843.914  | -0.6792   | 0.000254  | -0.42955  | 0.032179 | -0.20621 | 0.550696 |
| ATSG49370 | ATSG49370 | 1.188904 | 1.784246 | 3.862963 | 2.474493 | 0.662467 | 0        | 1.778607 | 4.31556  | 1.952492 | 2.878607 | 6.65167  | 4.143626  | -0.45951  | 0.534596  | 0.104473  | 0.905872 | 0.56472  | NA       |
| ATSG49380 | ATSG49380 | 10.70014 | 16.01582 | 3.862963 | 2.474493 | 3.974804 | 3.987363 | 8.003731 | 2.15778  | 2.928738 | 12.47396 | 11.97301 | 10.35907  | -1.14715  | 0.041748  | -0.83992  | 0.176238 | 0.       |          |

|           |           |          |          |          |           |          |          |           |          |          |          |          |          |          |          |          |          |          |          |
|-----------|-----------|----------|----------|----------|-----------|----------|----------|-----------|----------|----------|----------|----------|----------|----------|----------|----------|----------|----------|----------|
| ATSG49800 | ATSG49800 | 27.34479 | 24.97944 | 54.08148 | 21.44561  | 17.88662 | 29.90522 | 11.56095  | 16.18335 | 18.54867 | 36.46235 | 26.60668 | 35.22082 | -0.59943 | 0.120973 | -1.0891  | 0.005826 | -0.10658 | 0.903463 |
| ATSG49810 | MMT1      | 70.6872  | 576.3115 | 593.6087 | 483.7635  | 517.3869 | 552.2498 | 568.2649  | 585.8372 | 454.9302 | 639.0507 | 643.8816 | 529.3482 | -0.29896 | 0.076818 | -0.24681 | 0.17551  | -0.07861 | 0.828997 |
| ATSG49820 | RUS6      | 268.6923 | 244.4417 | 272.9827 | 211.1568  | 191.453  | 199.3682 | 234.7761  | 219.0147 | 203.0596 | 232.2076 | 222.1658 | 264.1562 | -0.38054 | 0.012139 | -0.25847 | 0.126016 | -0.12932 | 0.66183  |
| ATSG49830 | EXO84B    | 505.2842 | 517.4313 | 466.1309 | 375.7106  | 396.1554 | 401.7268 | 390.4042  | 424.0037 | 409.0471 | 426.0338 | 381.8058 | 387.429  | -0.34093 | 0.005048 | -0.27952 | 0.032162 | -0.30942 | 0.074142 |
| ATSG49840 | ATSG49840 | 354.2934 | 347.9228 | 352.8173 | 287.8661  | 239.8132 | 271.1407 | 329.9136  | 368.9804 | 323.1374 | 344.4733 | 345.8868 | 449.5834 | -0.39346 | 0.014033 | -0.04661 | 0.082567 | 0.111089 | 0.730645 |
| ATSG49850 | JAL46     | 0        | 0        | 0        | 2.886909  | 1.987402 | 0.996841 | 2.66791   | 3.23667  | 0.976246 | 0.959536 | 0        | 0        | 0.94816  | 0.131613 | 0.984672 | 0.12556  | 0.132801 | NA       |
| ATSG49860 | JAL47     | 0        | 0        | 0        | 0         | 0.662467 | 0        | 0         | 0        | 0        | 0        | 0        | 0        | 0.128567 | NA       | 0        | NA       | 0        | NA       |
| ATSG49870 | JAL48     | 0        | 1.784246 | 0        | 0         | 0        | 0        | 0         | 0.889303 | 0        | 0        | 0        | 0        | -0.26522 | NA       | -0.08117 | NA       | -0.24296 | NA       |
| ATSG49880 | MAD1      | 269.8812 | 219.4623 | 243.3667 | 178.1635  | 188.1407 | 221.2987 | 232.9975  | 225.488  | 173.7718 | 265.7914 | 208.8624 | 206.1454 | -0.32448 | 0.099443 | -0.2127  | 0.337747 | -0.10505 | 0.794445 |
| ATSG49890 | CLC-C     | 407.7941 | 355.065  | 332.2148 | 298.1765  | 249.0877 | 371.8216 | 349.4963  | 376.5326 | 289.9451 | 352.1496 | 305.9768 | 335.6337 | -0.25495 | 0.200164 | -0.10788 | 0.649417 | -0.13656 | 0.712038 |
| ATSG49900 | ATSG49900 | 85.60108 | 80.29107 | 81.12222 | 144.7579  | 147.7302 | 127.5956 | 224.9938  | 203.9102 | 194.273  | 84.43914 | 54.54369 | 90.12387 | 0.746172 | 0.000226 | 1.297798 | 2.22E-11 | -0.0915  | 0.858716 |
| ATSG49910 | HSP70-7   | 2721.401 | 2144.664 | 2218.628 | 1419.122  | 1434.904 | 1556.068 | 1770.603  | 2000.262 | 1873.416 | 2354.7   | 2646.034 | 2514.145 | -0.67912 | 1.46E-08 | -0.32613 | 0.012904 | 0.082467 | 0.752531 |
| ATSG49920 | ATSG49920 | 0        | 0        | 0        | 1.649662  | 1.987402 | 0.996841 | 2.66791   | 3.23667  | 0.976246 | 0.959536 | 0        | 0        | 0.878298 | 0.16145  | 0.75243  | 0.253244 | 0.333758 | NA       |
| ATSG49930 | emb1441   | 385.2049 | 346.1437 | 339.9407 | 287.4537  | 270.9491 | 260.1754 | 321.0386  | 360.3492 | 299.7075 | 309.93   | 321.9408 | 360.4955 | -0.38102 | 0.007997 | -0.12898 | 0.462188 | -0.11094 | 0.699093 |
| ATSG49940 | NIFU2     | 551.6514 | 645.8971 | 677.3062 | 724.2017  | 760.5124 | 628.0097 | 1002.245  | 927.8453 | 1155.875 | 781.062  | 866.0474 | 874.3051 | 0.173707 | 0.282524 | 0.711098 | 3.17E-07 | 0.422364 | 0.026611 |
| ATSG49945 | ATSG49945 | 212.8138 | 189.1301 | 150.6556 | 154.6558  | 177.5412 | 168.4661 | 160.0746  | 148.8868 | 190.368  | 167.9187 | 175.6041 | 138.8115 | -0.14264 | 0.52386  | -0.14208 | 0.554483 | -0.19467 | 0.591092 |
| ATSG49950 | ATSG49950 | 164.0687 | 153.4452 | 164.8198 | 248.6866  | 198.0777 | 233.2607 | 218.7687  | 196.358  | 133.7457 | 162.1615 | 183.5861 | 161.6014 | 0.481693 | 0.019558 | 0.179411 | 0.477811 | 0.064948 | 0.895329 |
| ATSG49960 | ATSG49960 | 159.3131 | 165.9349 | 130.0531 | 75.05963  | 84.79581 | 94.69987 | 94.26617  | 125.1512 | 66.38473 | 146.809  | 155.6491 | 125.3447 | -0.81638 | 0.000353 | -0.64781 | 0.00768  | -0.08492 | 0.875611 |
| ATSG49970 | PPOX1     | 744.2539 | 799.3422 | 779.0309 | 550.1624  | 575.0216 | 567.2024 | 728.3396  | 703.4362 | 517.4104 | 786.8192 | 701.086  | 738.6014 | -0.44998 | 0.001994 | -0.24822 | 0.127393 | -0.05805 | 0.864774 |
| ATSG49980 | AFB5      | 1060.502 | 769.011  | 831.8247 | 500.2601  | 489.5633 | 613.0571 | 643.8557  | 725.014  | 569.1514 | 750.3569 | 814.1644 | 704.6164 | -0.72435 | 6.93E-06 | -0.45245 | 0.00878  | -0.22949 | 0.421549 |
| ATSG49990 | NAT5      | 122.4571 | 126.6815 | 101.7247 | 128.6737  | 96.72022 | 113.6398 | 113.8308  | 143.4924 | 105.4346 | 103.6298 | 83.81104 | 107.7343 | -0.03714 | 0.898036 | 0.047852 | 0.876357 | -0.22957 | 0.574525 |
| ATSG50000 | ATSG50000 | 644.3859 | 758.3046 | 685.0321 | 553.0493  | 546.5355 | 594.1171 | 469.5522  | 515.7094 | 513.5054 | 638.0912 | 513.5089 | 677.4829 | -0.29661 | 0.038564 | -0.46968 | 0.008869 | -0.18197 | 0.456482 |
| ATSG50010 | BHLH145   | 0        | 0        | 0        | 0         | 0        | 0        | 0         | 0        | 0        | 0        | 0        | 0        | #N/A     | #N/A     | #N/A     | #N/A     | #N/A     | #N/A     |
| ATSG50011 | CpUORF37  | 0        | 0        | 0        | 0         | 0        | 0        | 0         | 0        | 0        | 0        | 0        | 0        | #N/A     | #N/A     | #N/A     | #N/A     | #N/A     | #N/A     |
| ATSG50012 | CpUORF36  | 0        | 0        | 0        | 0         | 0        | 0        | 0         | 0        | 0        | 0        | 0        | 0        | #N/A     | #N/A     | #N/A     | #N/A     | #N/A     | #N/A     |
| ATSG50020 | PAT09     | 298.4149 | 240.8732 | 204.737  | 182.7001  | 174.8914 | 204.3524 | 157.4067  | 181.2535 | 189.3917 | 236.0458 | 218.1748 | 210.289  | -0.4049  | 0.025683 | -0.48913 | 0.008798 | -0.1618  | 0.636026 |
| ATSG50030 | ATSG50030 | 0        | 0        | 0        | 0         | 0        | 0        | 0         | 0.976246 | 0        | 0        | 0        | 0        | 0        | NA       | 0.170848 | NA       | 0.383711 | NA       |
| ATSG50040 | ATSG50040 | 0        | 0        | 0        | 0         | 0        | 0        | 0         | 0        | 0        | 0        | 0        | 0        | #N/A     | #N/A     | #N/A     | #N/A     | #N/A     | #N/A     |
| ATSG50050 | ATSG50050 | 0        | 0        | 0        | 0         | 0        | 0        | 0         | 0        | 0        | 0        | 0        | 1.035907 | 0        | NA       | 0        | NA       | 0.172362 | NA       |
| ATSG50060 | ATSG50060 | 0        | 0        | 0        | 0.662467  | 0        | 0        | 0         | 0.976246 | 0        | 0        | 1.035907 | 0        | 0.099421 | NA       | 0.15305  | NA       | 0.164334 | NA       |
| ATSG50070 | ATSG50070 | 0        | 0        | 0        | 0         | 0        | 0        | 0         | 0        | 0        | 0.959536 | 0        | 0        | 0        | NA       | 0        | NA       | 0.171512 | NA       |
| ATSG50080 | ERF110    | 0        | 0        | 0        | 0.412416  | 0        | 0        | 0         | 0        | 0        | 0        | 0        | 0        | 0.095918 | NA       | 0        | NA       | 0        | NA       |
| ATSG50090 | ATSG50090 | 7.133424 | 7.136984 | 11.58889 | 21.03319  | 26.49869 | 8.971567 | 13.33955  | 10.7889  | 18.54867 | 9.595356 | 15.96401 | 14.50269 | 0.948703 | 0.051366 | 0.562532 | 0.319735 | 0.468903 | 0.515769 |
| ATSG50100 | ATSG50100 | 227.0807 | 274.7739 | 285.8593 | 238.7886  | 208.0147 | 151.5198 | 218.7687  | 158.5968 | 241.3287 | 267.7104 | 388.4575 | 335.6337 | -0.37165 | 0.123205 | -0.32379 | 0.197684 | 0.320642 | 0.400671 |
| ATSG50110 | ATSG50110 | 64.20081 | 53.52738 | 60.51975 | 81.65828  | 74.8588  | 77.75358 | 58.69403  | 62.57562 | 80.05217 | 74.84378 | 37.24935 | 61.11849 | 0.371372 | 0.188565 | 0.157552 | 0.64874  | -0.02714 | 0.971681 |
| ATSG50111 | ATSG50111 | 0        | 0        | 0        | 0         | 0.662467 | 0        | 0         | 0        | 0        | 0        | 0        | 0        | 0.128567 | NA       | 0        | NA       | 0        | NA       |
| ATSG50115 | ATSG50115 | 0        | 1.784246 | 0        | 0         | 0        | 0        | 0         | 0        | 0.976246 | 0        | 0        | 0        | -0.266   | NA       | -0.07274 | NA       | -0.24323 | NA       |
| ATSG50120 | ATSG50120 | 0        | 3.568492 | 10.30123 | 7.42348   | 7.949607 | 2.990522 | 2.66791   | 4.31556  | 2.928738 | 12.47396 | 3.991002 | 7.251346 | 0.300018 | 0.682232 | -0.30517 | 0.699319 | 0.543389 | NA       |
| ATSG50130 | ATSG50130 | 54.68958 | 49.58859 | 55.36914 | 136.922   | 135.8058 | 127.5956 | 142.28696 | 122.6891 | 112.2046 | 111.292  | 62.36982 | 74.4987  | 62.15439 | 1.275991 | 1.9E-10  | 0.147288 | 1.08E-07 | 0.281901 |
| ATSG50136 | ATSG50136 | 0        | 0        | 0        | 0         | 0        | 0        | 0         | 0        | 1.0      | 0        | 0        | 0        | #N/A     | #N/A     | #N/A     | #N/A     | #N/A     | #N/A     |
| ATSG50140 | ATSG50140 | 0        | 0        | 0        | 0.824831  | 0        | 0        | 1.778607  | 1.07889  | 0        | 0        | 0        | 1.035907 | 0.138793 | NA       | 0.450628 | NA       | 0.165314 | NA       |
| ATSG50150 | ATSG50150 | 223.5139 | 132.0342 | 145.5049 | 113.8267  | 70.22153 | 90.71251 | 103.1592  | 86.3112  | 90.79088 | 157.3638 | 147.6671 | 159.5296 | -0.83359 | 0.000453 | -0.81236 | 0.000998 | -0.1134  | 0.83622  |
| ATSG50160 | FR08      | 865.5221 | 871.4998 | 857.5778 | 829.7807  | 862.5324 | 955.9703 | 1340.18   | 1132.834 | 951.8397 | 703.3396 | 709.068  | 800.7557 | -0.07598 | 0.683575 | 0.444036 | 0.003631 | -0.17691 | 0.515769 |
| ATSG50170 | ATSG50170 | 115.3237 | 98.13333 | 108.363  | 171.34789 | 62.27192 | 59.81045 | 103.1592  | 61.31347 | 115.1443 | 85.14137 | 109.8061 | 0        | -0.70141 | 0.002908 | -0.15607 | 0.602615 | -0.048   | 0.936751 |
| ATSG50175 | ATSG50175 | 0        | 0        | 0        | 0         | 0        | 0        | 0         | 0        | 0        | 1.919071 | 0        | 0        | 0        | NA       | 0        | NA       | 0.256851 | NA       |
| ATSG50180 | ATSG50180 | 451.7835 | 449.63   | 477.7198 | 440.0474  | 469.0268 | 411.6952 | 469.5522  | 449.8971 | 347.5436 | 397.2477 | 473.5989 | 443.368  | -0.06029 | 0.755032 | -0.12084 | 0.522798 | -0.07157 | 0.836577 |
| ATSG50190 | ATSG50190 | 1.188904 | 0        | 0        | 0         | 0.662467 | 0.996841 | 2.66791   | 3.23667  | 0        | 0        | 1.330334 | 0        | 0.057614 | NA       | -0.24354 | NA       | -0.01082 | NA       |
| ATSG50200 | NRT3.1    | 49.93397 | 66.0171  | 43.78025 | 430.1494  | 407.4174 | 293.0712 | 284.5771  | 260.0125 | 328.9949 | 29.7456  | 38.57969 | 43.50807 | 2.745466 | 5.65E-36 | 2.3755   | 1.27E-26 | -0.46854 | 0.28843  |
| ATSG50210 | QS        | 558.7849 | 392.5341 | 396.5975 | 177.7511  | 166.2793 | 175.444  | 233.8868  | 228.7247 | 150.3419 | 364.6235 | 355.1992 | 347.0287 | -1.34349 | 4.39E-13 | -1.11096 | 4.9E-09  | -0.33257 | 0.2897   |
| ATSG50220 | ATSG50220 | 0        | 0        | 0        | 0         | 0        | 0        | 0         | 0        | 0        | 0        | 0        | 0        | #N/A     | #N/A     | #N/A     | #N/A     | #N/A     | #N/A     |
| ATSG50230 | ATSG50230 | 164.0687 | 206.9725 | 182.8469 | 199.6091  | 178.2037 | 197.3745 | 191.2002  | 201.7524 | 174.748  | 189.9881 | 159.6401 | 177.14   | 0.063837 | 0.761681 | 0.043781 | 0.852916 | -0.05614 | 0.889101 |
| ATSG50240 | PIMT2     | 19.02246 | 41.03766 | 29.61605 | 21.85803  | 24.51129 | 18.93997 | 31.12562  | 48.55005 | 60.03759 | 60.45074 | 41.24035 | 33.14901 | -0.38004 | 0.34261  | 0.386664 | 0.351748 | 0.58155  | 0.30077  |
| ATSG50250 | CP1B      | 672.9196 | 815.4004 | 802.2087 | 626.8717  | 653.1927 | 701.7759 | 763.2428  | 817.7986 | 794.6672 | 933.6282 | 1042.982 | 772.7863 | -0.20592 | 0.190839 | -0.05319 | 0.786986 | 0.260446 | 0.251643 |
| ATSG50260 | CEP1      | 1.188904 | 1.784246 | 5.150617 | 20.20836  | 13.91181 | 25.91786 | 20.45398  | 26.97225 | 7.809968 | 5.757214 | 0        | 3.10772  | 1.994916 | 0.000199 | 1.883424 | 0.000649 | 0.043535 | NA       |
| ATSG50270 | ATSG50270 | 0        | 0        | 0        | 0.824831  | 0.662467 | 0.996841 | 0.889303  | 0        | 0        | 0        | 0        | 0        | 0.487706 | NA       | 0.166769 | NA       | 0        | NA       |
| ATSG50280 | EMB1006   | 211.6249 | 212.3253 | 213.7506 | 116.3012  | 90.09555 | 126.5988 | 161.8532  | 187.7268 | 120.0783 | 204.3811 | 231.4781 | 202.0018 | -0.91762 | 1.91E-06 | -0.43158 | 0.044171 |          |          |

|           |           |          |           |          |          |          |          |          |          |          |          |          |          |           |           |          |          |           |          |
|-----------|-----------|----------|-----------|----------|----------|----------|----------|----------|----------|----------|----------|----------|----------|-----------|-----------|----------|----------|-----------|----------|
| ATSG50680 | SAE1B-1   | 173.58   | 237.3047  | 217.6136 | 282.0923 | 299.4352 | 321.9796 | 315.7027 | 293.4581 | 287.9926 | 196.7048 | 235.4691 | 226.8635 | 0.520454  | 0.001086  | 0.51563  | 0.001754 | 0.073242  | 0.849275 |
| ATSG50690 | HS4       | 1.188904 | 0         | 0        | 2.062078 | 2.649869 | 1.993682 | 1.778607 | 1.07889  | 1.952497 | 0.995936 | 0        | 1.035907 | 0.798711  | 0.228723  | 0.518372 | 0.477898 | 0.096392  | NA       |
| ATSG50700 | HS1       | 0        | 0         | 1.287654 | 4.124156 | 7.28714  | 4.984204 | 5.575214 | 1.07889  | 2.928738 | 0.995936 | 0        | 0        | 1.569121  | 0.01191   | 0.802245 | 0.257771 | -0.12199  | NA       |
| ATSG50710 | ATSG50710 | 1.188904 | 0         | 0        | 0        | 0.662467 | 0        | 0.889303 | 0        | 2.928738 | 0.995936 | 0        | 0        | -0.15238  | NA        | 0.379396 | NA       | -0.05106  | NA       |
| ATSG50715 | ATSG50715 | 0        | 0         | 0        | 0        | 0.662467 | 0        | 0        | 0        | 0        | 0        | 0        | 0        | 0.128567  | NA        | 0        | NA       | 0         | NA       |
| ATSG50717 | MIR4058   | 0        | 0         | 0        | 0        | 0        | 0        | 0        | 0        | 0        | 0        | 0        | 0        | #N/A      | #N/A      | #N/A     | #N/A     | #N/A      | #N/A     |
| ATSG50720 | HVA2ZE    | 21.40027 | 23.1952   | 28.3284  | 16.90904 | 21.19895 | 11.96209 | 17.78607 | 14.02557 | 19.52492 | 23.02886 | 18.62468 | 32.1131  | -0.46731  | 0.256448  | -0.44857 | 0.320479 | 0.02844   | 0.979501 |
| ATSG50740 | ATSG50740 | 382.8271 | 355.065   | 359.2556 | 216.9306 | 202.0525 | 209.3366 | 146.7351 | 122.9935 | 288.9668 | 381.8952 | 383.1362 | 391.5727 | -0.77173  | 0.001587  | -0.93272 | 0.000416 | 0.072977  | 0.900456 |
| ATSG50750 | RG4       | 0        | 0         | 0        | 0.824831 | 0.662467 | 0        | 0.889303 | 0        | 0.976246 | 0.995936 | 0        | 0        | 0.297723  | NA        | 0.333844 | NA       | 0.173449  | NA       |
| ATSG50760 | ATSG50760 | 0        | 1.784246  | 5.150617 | 22.27044 | 23.84882 | 33.89259 | 26.6791  | 18.34113 | 21.47741 | 1.919071 | 3.991002 | 1.035907 | 2.58958   | 1.18E-07  | 2.355216 | 2.8E-06  | -0.10853  | NA       |
| ATSG50770 | HS6       | 0        | 0         | 0        | 0        | 0.996841 | 0        | 0        | 0        | 0        | 0        | 0        | 0        | 0.134822  | NA        | 0        | NA       | 0.152581  | NA       |
| ATSG50780 | ATSG50780 | 153.3686 | 146.3082  | 146.7926 | 118.7757 | 115.2693 | 111.6462 | 160.9639 | 154.2813 | 142.5319 | 115.1443 | 131.7031 | 102.5547 | -0.35909  | 0.047038  | 0.034906 | 0.889016 | -0.35525  | 0.203688 |
| ATSG50790 | SWEET10   | 49.93397 | 21.41095  | 10.30123 | 0.824831 | 2.649869 | 3.987363 | 4.446517 | 7.55223  | 0        | 33.58375 | 11.97301 | 36.25673 | -2.45636  | 5.62E-06  | -1.98434 | 0.000392 | 0.013732  | NA       |
| ATSG50800 | SWEET13   | 58.25629 | 69.5856   | 63.09506 | 30.51875 | 21.19895 | 24.92102 | 4.446517 | 4.31556  | 4.88123  | 68.12703 | 70.5077  | 62.15439 | -1.21855  | 6.74E-06  | -3.23048 | 2.68E-19 | 0.081887  | 0.898539 |
| ATSG50801 | ATSG50801 | 0        | 0         | 0        | 0        | 0        | 0        | 0        | 0        | 0        | 0        | 0        | 0        | #N/A      | #N/A      | #N/A     | #N/A     | #N/A      | #N/A     |
| ATSG50805 | ATSG50805 | 0        | 0         | 0        | 0        | 0        | 0        | 0        | 0        | 0        | 0        | 0        | 0        | #N/A      | #N/A      | #N/A     | #N/A     | #N/A      | #N/A     |
| ATSG50810 | TIM8      | 115.3237 | 78.50683  | 87.5605  | 145.1703 | 167.0042 | 110.6493 | 93.37687 | 71.20674 | 190.368  | 93.07496 | 85.14137 | 111.8779 | 0.546951  | 0.102371  | 0.305425 | 0.428007 | 0.035369  | 0.968434 |
| ATSG50820 | anac097   | 7.133424 | 0         | 9.01358  | 4.536571 | 5.962205 | 3.987363 | 5.335821 | 0        | 5.875476 | 8.635821 | 2.660668 | 13.46678 | -0.14991  | 0.848297  | -0.35609 | 0.647524 | 0.392022  | NA       |
| ATSG50830 | ATSG50830 | 0        | 0         | 0        | 0        | 0.996841 | 0        | 0        | 0        | 0        | 0        | 0        | 0        | 0.15625   | NA        | 0        | NA       | 0         | NA       |
| ATSG50840 | ATSG50840 | 221.1361 | 262.2842  | 266.5444 | 341.8925 | 471.6767 | 444.591  | 446.4303 | 345.2448 | 373.9022 | 326.2421 | 304.6465 | 274.5152 | 0.728867  | 3.42E-05  | 0.626503 | 0.000606 | 0.268364  | 0.387801 |
| ATSG50850 | PDH2      | 1426.685 | 1466.65   | 1476.94  | 1438.506 | 1613.77  | 1434.544 | 1443.34  | 1437.081 | 1371.626 | 1485.361 | 1492.635 | 1351.858 | 0.038175  | 0.77067   | -0.039   | 0.78029  | -0.01345  | 0.961547 |
| ATSG50860 | ATSG50860 | 204.4915 | 239.089   | 226.6272 | 221.4672 | 210.6646 | 215.3176 | 245.4476 | 267.5647 | 326.2515 | 213.0169 | 187.5771 | 218.5763 | -0.04158  | 0.831973  | 0.163409 | 0.362684 | -0.10176  | 0.750463 |
| ATSG50870 | UBC27     | 275.8257 | 306.8903  | 307.7494 | 461.0806 | 489.5633 | 393.7521 | 425.9764 | 368.9804 | 486.1705 | 327.2016 | 296.6645 | 351.1723 | 0.590285  | 0.000156  | 0.518997 | 0.001413 | 0.132889  | 0.680764 |
| ATSG50880 | ATSG50880 | 0        | 0         | 0        | 0        | 0        | 0        | 0        | 0        | 0        | 0        | 0        | 0        | 0         | NA        | 0        | NA       | 0.172362  | NA       |
| ATSG50890 | ATSG50890 | 72.52314 | 55.31163  | 64.38272 | 41.65397 | 43.06037 | 44.85784 | 32.01493 | 26.97225 | 31.23987 | 64.28889 | 86.47171 | 72.51346 | -0.56431  | 0.027781  | -1.0427  | 0.0001   | 0.187116  | 0.707595 |
| ATSG50900 | ATSG50900 | 323.3819 | 248.0102  | 235.6407 | 118.3633 | 138.4557 | 184.4155 | 154.7388 | 215.778  | 224.5366 | 210.1383 | 196.8894 | 217.5404 | -0.86207  | 4.56E-05  | -0.43156 | 0.066871 | -0.36035  | 0.30524  |
| ATSG50910 | ATSG50910 | 0        | 0         | 0        | 0        | 0        | 0.996841 | 0        | 0        | 0        | 0        | 0        | 0        | #N/A      | #N/A      | #N/A     | #N/A     | #N/A      | #N/A     |
| ATSG50915 | BHLH137   | 178.3356 | 140.9554  | 126.1901 | 77.94654 | 74.19633 | 47.84836 | 63.14055 | 47.47116 | 90.79088 | 144.8899 | 231.4781 | 147.0987 | -1.07823  | 9.23E-05  | -1.07994 | 0.000147 | 0.213789  | 0.698852 |
| ATSG50920 | CLP1C     | 157.1612 | 14825.3   | 12612.57 | 7421.006 | 6280.19  | 8647.594 | 10819.27 | 13078.3  | 10988.62 | 13105.34 | 13053.24 | 13492.68 | -0.93572  | 2.58E-11  | -0.30242 | 0.059899 | -0.12033  | 0.681825 |
| ATSG50930 | ATSG50930 | 13.07794 | 17.136984 | 11.58889 | 15.61719 | 9.937009 | 4.984204 | 11.56095 | 14.02557 | 5.875476 | 18.23118 | 27.93701 | 16.5745  | -0.01905  | 0.977121  | -0.05071 | 0.942899 | 0.71816   | NA       |
| ATSG50940 | ATSG50940 | 17.83356 | 16.05821  | 18.02716 | 11.96005 | 13.24935 | 7.974726 | 12.45025 | 12.94668 | 14.64369 | 38.38143 | 43.90102 | 18.64632 | -0.54486  | 0.235554  | -0.33159 | 0.530476 | 0.849828  | 0.157287 |
| ATSG50950 | FUM2      | 4993.397 | 6048.594  | 5723.624 | 968.7642 | 1046.698 | 1255.023 | 2353.986 | 2122.177 | 1882.202 | 8398.815 | 9212.563 | 6807.978 | -2.31867  | 1.4E-55   | -1.37435 | 4.55E-20 | 0.533681  | 0.007677 |
| ATSG50960 | NBP35     | 433.9499 | 458.5512  | 475.1445 | 517.994  | 576.3465 | 539.2909 | 514.0174 | 594.4684 | 615.035  | 450.0222 | 452.3135 | 413.3267 | 0.253408  | 0.058888  | 0.32967  | 0.014703 | -0.05533  | 0.856007 |
| ATSG50970 | ATSG50970 | 158.1242 | 169.5034  | 191.8605 | 191.7732 | 176.8788 | 199.3682 | 195.6468 | 161.8335 | 112.2683 | 174.6325 | 162.3007 | 177.1361 | -0.124173 | 0.164669  | -0.13901 | 0.593556 | -0.01297  | 0.983524 |
| ATSG50990 | PCMP-H59  | 29.7226  | 42.8219   | 30.9037  | 21.85803 | 16.56168 | 27.91154 | 19.56468 | 22.65669 | 23.4299  | 38.38143 | 23.94601 | 26.93357 | -0.59109  | 0.098538  | -0.58246 | 0.134313 | -0.15896  | 0.838414 |
| ATSG50995 | ATSG50995 | 0        | 0         | 0        | 0        | 0        | 0        | 0        | 0        | 0        | 0        | 0        | 0        | #N/A      | #N/A      | #N/A     | #N/A     | #N/A      | #N/A     |
| ATSG51000 | ATSG51000 | 1.188904 | 0         | 0        | 0        | 0.662467 | 0        | 0        | 0        | 0        | 0        | 0        | 0        | -0.07436  | NA        | -0.18968 | NA       | -0.18606  | NA       |
| ATSG51010 | ATSG51010 | 191.4135 | 206.9725  | 190.5728 | 219.4051 | 222.589  | 146.5356 | 275.6841 | 237.3558 | 371.9497 | 227.4099 | 307.3071 | 318.0233 | 0.008621  | 0.978437  | 0.57     | 0.0164   | 0.515144  | 0.120128 |
| ATSG51020 | CR1       | 457.728  | 529.9211  | 553.6914 | 392.2072 | 362.3696 | 332.9448 | 470.4415 | 433.7138 | 415.8808 | 558.4497 | 613.284  | 561.4613 | -0.48903  | 0.00023   | -0.21791 | 0.153386 | 0.168005  | 0.481893 |
| ATSG51030 | ATSG51030 | 4.755616 | 1.784246  | 1.287654 | 1.649662 | 0        | 0.996841 | 3.557214 | 1.07889  | 2.928738 | 5.757214 | 3.991002 | 8.278252 | -0.74976  | 0.287728  | -0.04137 | 0.961111 | 0.767111  | NA       |
| ATSG51040 | SDHAF2    | 214.0027 | 219.4623  | 248.5173 | 433.4488 | 505.4625 | 424.6542 | 462.1754 | 421.846  | 540.8403 | 263.8723 | 219.2802 | 274.5152 | 0.977841  | 7.61E-09  | 0.950564 | 3.03E-08 | 0.317865  | 0.274712 |
| ATSG51050 | ATSG51050 | 89.1678  | 90.99655  | 108.163  | 104.3411 | 97.38269 | 109.6525 | 102.2699 | 90.62675 | 91.76712 | 78.68192 | 99.77505 | 102.5547 | 0.102303  | 0.683575  | -0.01842 | 0.95125  | -0.0449   | 0.933785 |
| ATSG51055 | ATSG51055 | 0        | 0         | 0        | 0        | 0        | 0        | 0        | 0        | 0        | 0        | 0        | 0        | #N/A      | #N/A      | #N/A     | #N/A     | #N/A      | #N/A     |
| ATSG51060 | RBOHC     | 2.377808 | 0         | 0        | 3.299325 | 3.312336 | 0        | 4.446517 | 4.31556  | 0.976246 | 4.797678 | 2.660668 | 2.071813 | 0.487733  | 0.504908  | 0.729513 | 0.314224 | 0.175911  | NA       |
| ATSG51070 | CLP1D     | 151.0197 | 1536.236  | 1304.394 | 1276.426 | 1181.179 | 1709.582 | 2239.266 | 2590.415 | 1805.079 | 1111.142 | 1168.033 | 1190.257 | -0.06262  | 0.78526   | 0.596312 | 0.000779 | -0.31973  | 0.253385 |
| ATSG51080 | ATSG51080 | 54.68958 | 42.8219   | 56.65679 | 41.65397 | 58.95959 | 50.83888 | 46.24378 | 43.1556  | 49.78855 | 45.09817 | 53.21336 | 54.90305 | -0.05181  | 0.6853794 | -0.1531  | 0.665606 | -0.02695  | 0.972024 |
| ATSG51090 | ATSG51090 | 0        | 0         | 1.287654 | 1.649662 | 1.324935 | 0        | 1.778607 | 0        | 4.31556  | 0.976246 | 0        | 0        | 0.299793  | 0.668591  | 0.760174 | 0.23832  | -0.28136  | NA       |
| ATSG51100 | FSD2      | 140.2907 | 117.7602  | 145.5049 | 244.15   | 229.8761 | 235.2544 | 190.3109 | 210.3835 | 289.9451 | 166.9592 | 151.6581 | 160.5655 | 0.785925  | 2.93E-05  | 0.746041 | 0.000119 | 0.234013  | 0.518301 |
| ATSG51105 | ATSG51105 | 0        | 1.784246  | 0        | 0        | 0        | 0        | 1.778607 | 0        | 0.976246 | 0        | 0        | 0        | -0.3977   | NA        | 0.22015  | NA       | -0.07516  | NA       |
| ATSG51110 | ATSG51110 | 1928.402 | 1891.301  | 1837.483 | 1110.223 | 1186.479 | 949.9893 | 1348.184 | 1409.03  | 1964.207 | 2292.331 | 2318.772 | 1828.375 | -0.78436  | 2.22E-06  | -0.25582 | 0.18913  | 0.183082  | 0.561641 |
| ATSG51120 | PABN1     | 247.292  | 248.0102  | 272.9827 | 354.6774 | 359.7197 | 338.9259 | 298.806  | 318.2725 | 348.5198 | 263.8723 | 214.1838 | 260.0125 | 0.449509  | 0.001779  | 0.32292  | 0.040051 | -0.05247  | 0.881708 |
| ATSG51130 | ATSG51130 | 49.93397 | 58.88012  | 54.08148 | 69.28582 | 96.05775 | 95.69671 | 102.2699 | 61.49673 | 72.2422  | 83.47996 | 57.20436 | 56.97486 | 0.639493  | 0.024008  | 0.515763 | 0.093366 | 0.276305  | 0.60677  |
| ATSG51140 | ATSG51140 | 353.1045 | 506.7259  | 455.8296 | 422.3135 | 414.7045 | 417.6763 | 470.4415 | 520.025  | 382.6884 | 497.999  | 541.4459 | 457.8700 | -0.065181 | 0.770882  | 0.065877 | 0.77826  | -0.187452 | 0.546902 |
| ATSG51150 | ATSG51150 | 286.5259 | 289.0479  | 311.6124 | 227.241  | 237.1633 | 232.2639 | 249.8943 | 247.0658 | 205.0117 | 255.2365 | 283.3611 | 256.9048 | -0.346    | 0.018294  | -0.33382 | 0.032259 | -0.15918  | 0.554396 |
| ATSG51160 | ATSG51160 | 2.377808 | 1.784246  | 0        | 2.474493 |          |          |          |          |          |          |          |          |           |           |          |          |           |          |



|           |           |          |          |          |          |          |          |          |          |          |          |          |          |          |          |           |           |           |          |
|-----------|-----------|----------|----------|----------|----------|----------|----------|----------|----------|----------|----------|----------|----------|----------|----------|-----------|-----------|-----------|----------|
| ATSG51640 | YLS7      | 134.3461 | 153.4452 | 119.7519 | 204.9705 | 172.2415 | 200.365  | 192.0896 | 185.5691 | 127.8882 | 88.27728 | 113.0784 | 104.6266 | 0.497804 | 0.018332 | 0.30957   | 0.195013  | -0.39912  | 0.244111 |
| ATSG51650 | ATSG51650 | 0        | 1.784246 | 0        | 0        | 0        | 0        | 0        | 0        | 0        | 0        | 0        | 0        | -0.2184  | NA       | -0.20558  | NA        | -0.19918  | NA       |
| ATSG51660 | CP5F160   | 411.3608 | 340.791  | 336.0778 | 237.5514 | 196.0903 | 278.1186 | 318.3706 | 310.7203 | 202.0829 | 372.2998 | 329.9228 | 342.8851 | -0.6026  | 0.002917 | -0.38022  | 0.087207  | -0.05763  | 0.906099 |
| ATSG51670 | ATSG51670 | 82.03437 | 64.23286 | 64.38272 | 24.74493 | 15.23675 | 24.92102 | 12.45025 | 19.42002 | 27.33489 | 58.53167 | 59.86503 | 51.79533 | -1.59864 | 2.96E-08 | -1.71492  | 2.24E-08  | -0.29854  | 0.582115 |
| ATSG51680 | ATSG51680 | 1.188904 | 0        | 1.287654 | 2.474493 | 2.649869 | 3.987363 | 0        | 0        | 0.976246 | 0.995936 | 1.330334 | 1.035907 | 0.847429 | 0.203523 | -0.34626  | 0.650796  | 0.08006   | NA       |
| ATSG51690 | ACS12     | 115.3237 | 94.56504 | 108.163  | 52.78919 | 41.07297 | 69.77885 | 87.15174 | 108.9679 | 34.16861 | 109.3871 | 103.766  | 88.05205 | -0.90311 | 0.005748 | -0.43793  | 0.240373  | -0.076    | 0.92594  |
| ATSG51700 | RAR1      | 110.5681 | 105.2705 | 131.3407 | 236.3141 | 230.5386 | 175.444  | 177.8607 | 137.019  | 164.8856 | 154.4448 | 137.0244 | 117.0574 | 0.867246 | 1.19E-05 | 0.450198  | 0.004969  | 0.226218  | 0.563955 |
| ATSG51710 | KEA5      | 154.5575 | 133.8185 | 130.0531 | 185.587  | 184.8284 | 223.2923 | 263.2338 | 175.8591 | 129.8401 | 151.4517 | 142.3457 | 158.4937 | 0.478549 | 0.05507  | 0.426143  | 0.109264  | 0.072866  | 0.906929 |
| ATSG51720 | NEET      | 373.3158 | 431.7875 | 457.1173 | 512.6326 | 478.3014 | 331.948  | 278.352  | 318.2725 | 624.7974 | 747.4783 | 650.5333 | 552.1382 | 0.067373 | 0.851445 | -0.04475  | 0.90839   | 0.597156  | 0.134409 |
| ATSG51730 | ATSG51730 | 186.6579 | 167.7191 | 166.1074 | 212.394  | 205.3649 | 180.4282 | 219.658  | 192.0424 | 244.0615 | 251.3983 | 242.1208 | 246.5458 | 0.201115 | 0.262607 | 0.325274  | 0.069516  | 0.495982  | 0.020287 |
| ATSG51740 | ATSG51740 | 74.90095 | 103.4863 | 81.12222 | 117.9509 | 119.2441 | 116.6304 | 118.2774 | 102.4945 | 95.67211 | 79.64146 | 77.15937 | 72.51346 | 0.455796 | 0.02845  | 0.299537  | 0.207822  | -0.15414  | 0.727437 |
| ATSG51750 | ATSBT1.3  | 613.4744 | 587.0169 | 513.7741 | 308.0744 | 337.8583 | 353.8785 | 337.046  | 359.2703 | 244.0615 | 606.4265 | 670.4883 | 529.3482 | -0.76581 | 3.66E-06 | -0.84938  | 3.78E-07  | 0.073037  | 0.852699 |
| ATSG51760 | AHG1      | 0        | 0        | 0.412416 | 0        | 0.996841 | 0.889303 | 0        | 0        | 0.995936 | 0        | 1.035907 | 0        | 0.237622 | NA       | 0.158194  | NA        | 0.366147  | NA       |
| ATSG51770 | ATSG51770 | 85.60108 | 78.50683 | 74.68395 | 114.6515 | 114.6068 | 112.643  | 115.6095 | 143.4924 | 173.7718 | 47.01725 | 46.56169 | 60.08258 | 0.500331 | 0.028017 | 0.827932  | 0.000174  | -0.60646  | 0.076727 |
| ATSG51780 | BHLH36    | 2.377808 | 1.784246 | 1.287654 | 0.412416 | 0.662467 | 0.996841 | 0        | 1.07889  | 0.976246 | 1.919071 | 1.330334 | 3.10772  | -0.58838 | 0.40194  | -0.52485  | 0.477261  | 0.144591  | NA       |
| ATSG51790 | BHLH120   | 9.511232 | 16.05821 | 33.47901 | 3.299325 | 5.299738 | 6.977885 | 3.557214 | 7.55223  | 10.73871 | 26.867   | 49.22236 | 39.3645  | -1.60145 | 0.000816 | -1.16575  | 0.022966  | 0.850342  | 0.223091 |
| ATSG51795 | ATSG51795 | 35.66712 | 37.46917 | 43.78025 | 14.84696 | 17.22415 | 18.93997 | 9.782338 | 7.55223  | 14.64369 | 26.867   | 43.90102 | 42.47217 | -1.12291 | 0.000913 | -1.66267  | 5.76E-06  | -0.05098  | 0.955367 |
| ATSG51800 | ATSG51800 | 2.377808 | 5.327388 | 1.287654 | 0.412416 | 2.649869 | 0.996841 | 0.889303 | 0        | 0.976246 | 0        | 1.035907 | 0        | -0.4915  | 0.494028 | -0.82673  | 0.226248  | -0.96419  | NA       |
| ATSG51810 | GA200X2   | 9.511232 | 1.784246 | 9.01358  | 4.124156 | 4.637271 | 6.977885 | 8.893035 | 6.47334  | 5.857476 | 2.878607 | 1.330334 | 4.143626 | -0.35442 | 0.595835 | 0.014237  | 0.985876  | -0.86525  | NA       |
| ATSG51812 | ATSG51812 | 0        | 0        | 0        | 0        | 0        | 0        | 0        | 0        | 0        | 0        | 0        | 0        | 0        | NA       | 0         | NA        | 0.172362  | NA       |
| ATSG51820 | PGMP      | 1005.813 | 1186.524 | 1008.233 | 781.9399 | 751.2379 | 863.2641 | 1376.642 | 1477     | 1194.925 | 1391.327 | 1509.929 | 1165.395 | -0.41107 | 0.005596 | 0.336322  | 0.030502  | 0.34189   | 0.104598 |
| ATSG51830 | ATSG51830 | 104.6235 | 82.07532 | 110.7833 | 179.4008 | 181.516  | 187.4061 | 147.6244 | 159.6757 | 207.9404 | 68.12703 | 107.7571 | 109.8061 | 0.841077 | 0.00012  | 0.757376  | 0.000936  | -0.07682  | 0.89034  |
| ATSG51840 | ATSG51840 | 247.292  | 285.4794 | 257.5309 | 327.0456 | 312.0221 | 334.9385 | 273.9055 | 236.2769 | 347.5436 | 341.5947 | 308.6375 | 269.3357 | 0.299017 | 0.105905 | 0.120987  | 0.588631  | 0.218782  | 0.484078 |
| ATSG51845 | ATSG51845 | 0        | 0        | 0        | 0        | 0        | 0        | 0        | 0        | 0        | 0        | 0        | 0        | #N/A     | #N/A     | #N/A      | #N/A      | #N/A      | #N/A     |
| ATSG51850 | ATSG51850 | 86.78999 | 69.5856  | 81.12222 | 29.28151 | 32.4609  | 29.90522 | 23.12189 | 30.20892 | 16.59618 | 67.16749 | 87.80204 | 89.08796 | -1.32186 | 1.34E-07 | -1.67905  | 6.15E-10  | 0.025909  | 0.97086  |
| ATSG51860 | ATSG51860 | 0        | 0        | 0        | 0.412416 | 0        | 0        | 0        | 1.07889  | 0        | 0.995936 | 1.330334 | 0        | 0.056163 | NA       | 0.177557  | NA        | 0.379724  | NA       |
| ATSG51870 | AGL71     | 1.188904 | 0        | 0        | 0.824831 | 0        | 0.996841 | 0        | 0        | 0.976246 | 0        | 0        | 3.10772  | 0.069605 | NA       | -0.06294  | NA        | 0.259649  | NA       |
| ATSG51880 | ATSG51880 | 178.3356 | 217.678  | 206.0247 | 336.5311 | 296.1229 | 255.1912 | 264.1231 | 230.8824 | 290.9213 | 210.1383 | 214.1838 | 246.5458 | 0.563237 | 0.001148 | 0.383481  | 0.043502  | 0.159107  | 0.64507  |
| ATSG51890 | PER66     | 117.7015 | 110.6233 | 105.5877 | 77.12171 | 64.25933 | 63.79781 | 48.02239 | 58.26006 | 48.8123  | 131.4564 | 123.7211 | 98.41112 | -0.66805 | 0.001661 | -0.10762  | 1.23E-06  | 0.079732  | 0.872888 |
| ATSG51900 | ATSG51900 | 0        | 0        | 0        | 0        | 0        | 0        | 0        | 0        | 0        | 0        | 0        | 0        | #N/A     | #N/A     | #N/A      | #N/A      | #N/A      | #N/A     |
| ATSG51910 | TCP19     | 40.42273 | 41.03766 | 27.04074 | 74.42739 | 33.78583 | 37.87995 | 32.90423 | 32.3667  | 67.36097 | 41.26003 | 35.91902 | 38.32854 | 0.140947 | 0.742184 | 0.273713  | 0.1515637 | 0.092304  | 0.913891 |
| ATSG51920 | ATSG51920 | 5.94452  | 7.136984 | 5.150617 | 4.722438 | 7.28714  | 7.974726 | 5.335821 | 6.47334  | 6.833722 | 3.881143 | 6.65167  | 8.287252 | 0.257657 | 0.693142 | 0.030184  | 0.969093  | 0.03224   | NA       |
| ATSG51930 | ATSG51930 | 0        | 0        | 1.287654 | 0        | 0        | 0        | 0        | 0        | 0        | 0        | 0        | 0        | -0.2184  | NA       | -0.20558  | NA        | -0.19918  | NA       |
| ATSG51940 | NRPB6A    | 185.469  | 228.3835 | 199.5864 | 442.5219 | 445.8405 | 345.9038 | 333.4888 | 351.7181 | 446.1444 | 264.8318 | 331.2532 | 289.0179 | 0.996782 | 1.13E-08 | 0.868455  | 1.26E-06  | 0.918358  | 0.038951 |
| ATSG51950 | ATSG51950 | 8.322328 | 14.27397 | 1.287654 | 3.299325 | 3.974804 | 2.990522 | 3.557214 | 3.23667  | 0.976246 | 18.23118 | 9.312338 | 7.251346 | -0.79617 | 0.204349 | -0.99137  | 0.128131  | 0.495433  | NA       |
| ATSG51960 | ATSG51960 | 122.4571 | 142.7397 | 154.5185 | 179.4008 | 206.0273 | 163.4819 | 153.8495 | 114.3623 | 225.5128 | 190.9476 | 301.9858 | 164.7091 | 0.3701   | 0.21404  | 0.224413  | 0.507251  | 0.610878  | 0.124756 |
| ATSG51970 | SDH       | 1067.636 | 1218.64  | 1115.109 | 847.1016 | 861.2075 | 831.3652 | 1299.272 | 1579.495 | 1808.008 | 1129.373 | 796.87   | 1062.874 | -0.41261 | 0.014926 | -0.455097 | 0.00772   | -0.17996  | 0.556808 |
| ATSG51980 | ZFWD2     | 148.6133 | 128.4657 | 187.9975 | 177.7511 | 147.7302 | 170.4598 | 176.8821 | 143.4924 | 124.9595 | 145.8494 | 148.9974 | 139.8474 | 0.083376 | 0.741069 | -0.0695   | 0.803773  | -0.10454  | 0.815889 |
| ATSG51990 | DREB1D    | 0        | 0        | 0        | 0.824831 | 0        | 0.987363 | 1.778607 | 0.65846  | 3.23667  | 1.924992 | 0.995936 | 0        | 0.36546  | 0.295795 | 0.940876  | 0.128077  | -0.134873 | NA       |
| ATSG52000 | IMPA8     | 0        | 0        | 2.575309 | 0.824831 | 0.662467 | 0.996841 | 1.778607 | 2.15778  | 0        | 2.878607 | 0        | 2.071813 | -0.07647 | 0.925249 | 0.162855  | 0.841301  | 0.322594  | NA       |
| ATSG52010 | ATSG52010 | 275.8257 | 265.8527 | 254.9556 | 177.3387 | 158.9921 | 183.4187 | 182.3072 | 211.4624 | 266.5152 | 236.0458 | 224.8264 | 210.2189 | -0.60625 | 0.000535 | -0.26707  | 0.172587  | -0.24222  | 0.415849 |
| ATSG52020 | ERF025    | 4.755616 | 3.568492 | 2.575309 | 1.649662 | 1.324935 | 0.996841 | 1.778607 | 1.07889  | 2.928738 | 0.995936 | 1.330334 | 2.071813 | -0.76736 | 0.266764 | -0.50277  | 0.513324  | -0.69413  | NA       |
| ATSG52030 | ATSG52030 | 158.1242 | 149.8767 | 137.779  | 113.4143 | 111.2945 | 108.6556 | 108.495  | 115.4412 | 120.0783 | 147.7685 | 151.6581 | 136.7397 | -0.4084  | 0.019746 | -0.3679   | 0.05334   | -0.03297  | 0.942666 |
| ATSG52040 | RS41      | 716.9091 | 754.7361 | 703.0593 | 700.6941 | 541.2358 | 751.6179 | 571.8221 | 643.3552 | 751.7094 | 642.8889 | 671.8187 | 630.8671 | -0.12381 | 0.156769 | -0.07222  | 0.379702  | -0.15747  | 0.604655 |
| ATSG52050 | ATSG52050 | 4.755616 | 14.27397 | 11.58889 | 23.09527 | 20.53649 | 54.82624 | 56.02612 | 62.57562 | 75.17094 | 9.595356 | 9.312338 | 13.46678 | 1.40614  | 0.001179 | 2.334783  | 1.56E-08  | 0.081079  | 0.948624 |
| ATSG52055 | ATSG52055 | 1.188904 | 0        | 0        | 0        | 0        | 0        | 0        | 0        | 0.995936 | 0        | 0        | 0        | -0.19179 | NA       | -0.17179  | NA        | -0.02864  | NA       |
| ATSG52060 | BAG1      | 778.7321 | 840.3799 | 887.1938 | 494.0739 | 535.2736 | 504.4014 | 457.102  | 431.556  | 488.123  | 906.7612 | 1110.829 | 911.5977 | -0.70055 | 1.58E-08 | -0.85315  | 8.52E-12  | 0.220972  | 0.28571  |
| ATSG52065 | ATSG52065 | 0        | 1.784246 | 0        | 0.412416 | 0        | 0        | 0.889303 | 0        | 0.976246 | 0        | 0        | 0        | -0.20148 | NA       | 0.084883  | NA        | -0.28022  | NA       |
| ATSG52067 | ATSG52067 | 0        | 0        | 0        | 0        | 0        | 0        | 0        | 0        | 0        | 0        | 0        | 0        | #N/A     | #N/A     | #N/A      | #N/A      | #N/A      | #N/A     |
| ATSG52070 | ATSG52070 | 67.76752 | 80.29107 | 90.1358  | 169.0904 | 174.8914 | 164.4787 | 154.7388 | 142.4135 | 164.0093 | 77.72239 | 63.85603 | 98.41112 | 1.069188 | 4.05E-08 | 0.929973  | 4.49E-06  | 0.023004  | 0.970744 |
| ATSG52080 | ATSG52080 | 0        | 0        | 0        | 0        | 0        | 0        | 0        | 0        | 0        | 0        | 0        | 0        | #N/A     | #N/A     | #N/A      | #N/A      | #N/A      | #N/A     |
| ATSG52090 | ATSG52090 | 0        | 0        | 0        | 0        | 0        | 0        | 0        | 0        | 0        | 0        | 0        | 0        | 0        | NA       | 0         | NA        | 0.172362  | NA       |
| ATSG52100 | DAPB3     | 351.9156 | 433.5718 | 400.4605 | 289.5157 | 239.1507 | 283.1028 | 347.7177 | 394.8737 | 246.9902 | 461.5366 | 482.9112 | 430.9371 | -0.53107 | 0.004221 | -0.25294  | 0.23474   | 0.211871  | 0.524396 |
| ATSG52110 | HCZF08    | 104.6235 | 89.2123  | 105.5877 | 109.7025 | 92.08295 | 98.68724 | 93.37687 | 97.100   |          |          |          |          |          |          |           |           |           |          |



|           |           |           |          |          |          |          |          |          |          |          |          |          |          |           |          |           |          |           |          |
|-----------|-----------|-----------|----------|----------|----------|----------|----------|----------|----------|----------|----------|----------|----------|-----------|----------|-----------|----------|-----------|----------|
| ATSG53470 | ACBP1     | 146.2352  | 153.4452 | 167.3951 | 172.8021 | 165.6168 | 153.5135 | 152.9602 | 171.5435 | 191.3442 | 132.4159 | 143.6761 | 175.0682 | 0.079014  | 0.729461 | 0.138773  | 0.543054 | -0.04857  | 0.916471 |
| ATSG53480 | KPNB1     | 1217.438  | 934.9449 | 793.1951 | 487.8876 | 411.3922 | 519.354  | 561.1505 | 662.4384 | 447.1207 | 645.7675 | 641.221  | 734.4577 | -1.02963  | 2.93E-08 | -0.7992   | 2.99E-05 | -0.53027  | 0.043197 |
| ATSG53486 | ATSG53486 | 54.68958  | 41.03766 | 37.34198 | 42.4788  | 42.39791 | 30.90206 | 43.57587 | 32.3667  | 36.1211  | 87.31774 | 62.5257  | 76.65708 | -0.18065  | 0.597466 | -0.23826  | 0.510563 | 0.730149  | 0.056462 |
| ATSG53487 | ATSG53487 | 0         | 0        | 0        | 0        | 0        | 0        | 0.889303 | 0        | 0        | 0        | 0        | 0        | 0         | NA       | 0.160764  | NA       | 0         | 0        |
| ATSG53490 | ATSG53490 | 1343.461  | 1595.116 | 1599.267 | 1094.139 | 1143.419 | 885.1946 | 1558.06  | 1364.796 | 1977.874 | 1615.858 | 1983.528 | 2202.337 | -0.52544  | 0.004039 | 0.109386  | 0.846087 | 0.347197  | 0.214384 |
| ATSG53500 | ATSG53500 | 705.02    | 458.1505 | 578.1568 | 238.7886 | 231.2011 | 298.0554 | 269.459  | 286.9847 | 246.014  | 615.0623 | 585.3469 | 629.8312 | -1.34706  | 7.85E-23 | -0.137239 | 0.522205 | -0.52177  | 0.733866 |
| ATSG53510 | OPT9      | 2.377808  | 1.784246 | 1.287654 | 0        | 0.662467 | 0        | 0.889303 | 0        | 0        | 7.672651 | 1.330334 | 5.179533 | -0.88689  | 0.178679 | -0.70727  | 0.314073 | 0.863213  | NA       |
| ATSG53520 | OPT8      | 0         | 0        | 0        | 0        | 0        | 0        | 1.778607 | 1.07889  | 0        | 1.919071 | 0        | 0        | 0         | NA       | 0.485986  | NA       | 0.508116  | NA       |
| ATSG53530 | VPS26A    | 204.4915  | 214.1095 | 238.2161 | 357.1519 | 345.1454 | 315.0017 | 337.046  | 241.6713 | 347.5436 | 252.3579 | 226.1568 | 268.2998 | 0.621262  | 0.000301 | 0.487671  | 0.007616 | 0.183205  | 0.584791 |
| ATSG53540 | ATSG53540 | 273.4479  | 314.0273 | 288.4346 | 395.5065 | 374.294  | 349.8911 | 360.1679 | 332.2981 | 345.5911 | 277.3058 | 300.6555 | 310.772  | 0.360781  | 0.007993 | 0.248636  | 0.099822 | 0.024817  | 0.946861 |
| ATSG53550 | YSL3      | 495.7729  | 458.5512 | 417.2    | 929.9971 | 787.0111 | 1069.61  | 530.0249 | 554.5494 | 427.5957 | 317.6063 | 275.3791 | 353.2441 | 1.002219  | 4.79E-10 | 0.137239  | 0.522205 | -0.52177  | 0.022797 |
| ATSG53560 | CYT8E     | 991.5459  | 1059.842 | 1219.409 | 1922.681 | 1972.828 | 1615.879 | 1921.785 | 1452.186 | 2273.677 | 1253.154 | 1227.898 | 1429.551 | 0.737844  | 1.67E-05 | 0.771933  | 7.25E-06 | 0.252374  | 0.401914 |
| ATSG53570 | ATSG53570 | 340.0265  | 290.8321 | 242.079  | 300.651  | 329.9087 | 403.7205 | 353.9428 | 348.4815 | 312.3987 | 236.0458 | 307.3071 | 223.7558 | 0.231727  | 0.270492 | 0.231095  | 0.350775 | -0.18844  | 0.602511 |
| ATSG53580 | PLR1      | 526.6844  | 636.9758 | 527.9383 | 452.4199 | 454.4525 | 426.6479 | 600.2799 | 553.4705 | 564.2702 | 505.6753 | 532.1336 | 649.5134 | -0.33233  | 0.022661 | 0.027443  | 0.891885 | 0.001733  | 0.996482 |
| ATSG53588 | CPuORF50  | 0         | 0        | 0        | 0        | 0        | 0        | 0        | 0        | 0        | 0        | 0        | 0        | #N/A      | #N/A     | #N/A      | #N/A     | #N/A      | #N/A     |
| ATSG53590 | ATSG53590 | 0         | 0        | 0        | 0        | 0        | 0        | 0        | 0        | 0        | 0        | 0        | 0        | #N/A      | #N/A     | #N/A      | #N/A     | #N/A      | #N/A     |
| ATSG53592 | ATSG53592 | 16.64466  | 19.62671 | 28.3284  | 14.02213 | 15.23675 | 15.94945 | 14.22886 | 18.34113 | 17.57243 | 28.78607 | 53.21336 | 35.22082 | -0.48016  | 0.25245  | -0.33402  | 0.484673 | 0.770186  | 0.162167 |
| ATSG53600 | ATSG53600 | 0         | 0        | 0        | 0        | 0        | 0        | 0        | 0        | 0        | 0        | 1.330334 | 0        | 0         | NA       | 0         | NA       | 0.172362  | NA       |
| ATSG53610 | ATSG53610 | 0         | 0        | 0        | 0        | 0        | 0        | 0        | 0        | 0        | 0        | 0        | 0        | #N/A      | #N/A     | #N/A      | #N/A     | #N/A      | #N/A     |
| ATSG53620 | ATSG53620 | 781.1099  | 640.5443 | 650.2654 | 515.9319 | 460.4148 | 600.0981 | 609.1729 | 582.6006 | 359.2585 | 741.721  | 852.7441 | 682.6624 | -0.38653  | 0.072244 | -0.40725  | 0.066773 | 0.130395  | 0.75998  |
| ATSG53635 | ATSG53635 | 0         | 0        | 0        | 0        | 0        | 0        | 0.889303 | 0        | 0        | 0        | 1.330334 | 0        | 0         | NA       | 0.141773  | NA       | 0.183636  | NA       |
| ATSG53640 | ATSG53640 | 0         | 1.784246 | 0        | 0        | 0        | 0        | 0.889303 | 0        | 0        | 0        | 0        | 0        | -0.26522  | NA       | -0.08117  | NA       | -0.24296  | NA       |
| ATSG53650 | ATSG53650 | 63.01191  | 57.09587 | 52.79383 | 125.7868 | 148.3927 | 88.71883 | 101.3806 | 74.44341 | 202.0829 | 57.57214 | 78.4897  | 113.9497 | 0.978276  | 0.005304 | 1.027681  | 0.004029 | 0.477729  | 0.433665 |
| ATSG53660 | GRF7      | 16.64466  | 16.05821 | 25.75309 | 12.78488 | 13.24935 | 10.96525 | 7.114428 | 10.7889  | 7.809968 | 26.867   | 13.30334 | 14.50269 | -0.57134  | 0.212827 | -0.10885  | 0.031289 | -0.06884  | NA       |
| ATSG53670 | ATSG53670 | 0         | 0        | 0        | 0        | 0.662467 | 0        | 0        | 0        | 0        | 0        | 0        | 0        | 0.128567  | NA       | 0         | NA       | 0         | NA       |
| ATSG53680 | ATSG53680 | 0         | 0        | 0        | 0        | 0        | 0.889303 | 0        | 0        | 0        | 0        | 0        | 0        | 0         | NA       | 0.160764  | NA       | 0         | NA       |
| ATSG53690 | ATSG53690 | 0         | 0        | 0        | 0        | 0        | 0        | 0        | 0        | 0        | 0        | 0        | 0        | #N/A      | #N/A     | #N/A      | #N/A     | #N/A      | #N/A     |
| ATSG53700 | ATSG53700 | 3.566712  | 0        | 1.287654 | 1.237247 | 0.662467 | 2.990522 | 0.889303 | 2.15778  | 0.976246 | 0        | 0        | 0        | -0.0361   | 0.965652 | -0.14653  | 0.860316 | -0.82614  | NA       |
| ATSG53710 | ATSG53710 | 0         | 1.784246 | 0        | 0.824831 | 1.987402 | 1.993682 | 0.889303 | 0        | 3.904984 | 0.995936 | 0        | 0        | 0.456758  | 0.498563 | 0.460107  | 0.508523 | -0.10642  | NA       |
| ATSG53720 | ATSG53720 | 0         | 0        | 0        | 0        | 0        | 0        | 0        | 0        | 0        | 0        | 0        | 0        | #N/A      | #N/A     | #N/A      | #N/A     | #N/A      | #N/A     |
| ATSG53730 | ATSG53730 | 39.23383  | 26.76369 | 27.04074 | 54.43886 | 62.27192 | 46.85152 | 54.24751 | 77.68008 | 78.09968 | 29.7456  | 33.25835 | 32.1131  | 0.753466  | 0.011132 | 1.083899  | 0.000207 | 0.003128  | 0.997083 |
| ATSG53740 | ATSG53740 | 0         | 0        | 0        | 0.824831 | 0.662467 | 0        | 0.889303 | 1.07889  | 1.952492 | 0        | 0        | 0        | 0.310408  | NA       | 0.685287  | NA       | 0.130395  | 0.75998  |
| ATSG53742 | ATSG53742 | 0         | 0        | 1.287654 | 0.824831 | 1.324935 | 0.996841 | 0.889303 | 0        | 5.928738 | 0        | 0        | 0        | 0.306604  | NA       | 0.394799  | NA       | -0.27544  | NA       |
| ATSG53750 | ATSG53750 | 30.9115   | 30.33218 | 48.93086 | 25.56977 | 28.48609 | 34.88043 | 49.80093 | 42.07671 | 59.55110 | 62.36982 | 63.85603 | 43.50807 | -0.422885 | 0.347656 | 0.422285  | 0.227912 | 0.507793  | 0.227791 |
| ATSG53760 | MLO11     | 142.6685  | 87.42806 | 123.6148 | 84.13278 | 86.12075 | 98.68724 | 92.48756 | 91.70564 | 69.31347 | 128.5778 | 175.6041 | 142.9551 | -0.40741  | 0.087534 | -0.47996  | 0.054467 | 0.304601  | 0.431857 |
| ATSG53770 | ATSG53770 | 105.8125  | 119.5445 | 92.71111 | 138.5716 | 114.6068 | 106.662  | 119.1667 | 130.5457 | 133.7457 | 99.79171 | 93.12338 | 102.5547 | 0.198051  | 0.379919 | 0.270856  | 0.241873 | -0.09105  | 0.849275 |
| ATSG53775 | ATSG53775 | 0         | 0        | 0        | 0        | 0.662467 | 0        | 0.889303 | 0        | 0        | 0        | 0        | 0        | 0.075064  | NA       | 0.126218  | NA       | 0.425649  | NA       |
| ATSG53780 | ATSG53780 | 0         | 0        | 0        | 0        | 0        | 0        | 0        | 0        | 0        | 0        | 0        | 0        | #N/A      | #N/A     | #N/A      | #N/A     | #N/A      | #N/A     |
| ATSG53790 | ATSG53790 | 0         | 1.784246 | 0        | 0        | 0        | 0        | 0        | 0        | 0        | 0        | 0        | 0        | -0.2184   | NA       | -0.20558  | NA       | -0.19918  | NA       |
| ATSG53800 | ATSG53800 | 278.2035  | 306.8903 | 272.9827 | 306.8372 | 364.357  | 275.1281 | 274.7948 | 302.0892 | 542.7928 | 248.5197 | 252.7635 | 238.2585 | 0.1392    | 0.625775 | 0.371369  | 0.163011 | -0.20489  | 0.657308 |
| ATSG53810 | ATSG53810 | 9.511232  | 8.92123  | 10.30123 | 11.54764 | 15.89921 | 18.93997 | 18.67537 | 14.02557 | 9.76246  | 15.35257 | 7.982004 | 15.5386  | 0.536919  | 0.289764 | 0.461273  | 0.407817 | -0.368853 | NA       |
| ATSG53815 | ATSG53815 | 17.83356  | 16.05821 | 15.45185 | 18.5587  | 20.53649 | 21.9305  | 16.89677 | 10.7889  | 28.31113 | 20.15025 | 21.28534 | 43.50807 | 0.24676   | 0.627303 | 0.153827  | 0.79374  | 0.68655   | 0.310967 |
| ATSG53820 | ATSG53820 | 0         | 0        | 3.862963 | 5.773818 | 3.974804 | 5.981045 | 2.66791  | 5.39445  | 10.73871 | 6.716749 | 3.991002 | 5.179533 | 0.966969  | 0.132679 | 0.436403  | 0.164554 | 0.979623  | NA       |
| ATSG53830 | VQ33      | 42.80054  | 23.1952  | 48.93086 | 49.90228 | 51.67245 | 62.80097 | 88.04104 | 69.04896 | 72.2422  | 32.62421 | 54.54369 | 46.61793 | 0.436403  | 0.164554 | 0.911252  | 0.001951 | 0.153802  | 0.818441 |
| ATSG53840 | ATSG53840 | 0         | 0        | 0        | 0        | 0        | 0        | 0        | 0        | 0        | 0        | 0        | 0        | #N/A      | #N/A     | #N/A      | #N/A     | #N/A      | #N/A     |
| ATSG53850 | ATSG53850 | 945.1786  | 1066.979 | 1044.288 | 766.6806 | 722.7518 | 797.4726 | 982.6803 | 963.4487 | 843.4765 | 1107.304 | 1267.808 | 981.0035 | -0.4131   | 0.002009 | -0.12884  | 0.428898 | 0.133117  | 0.595343 |
| ATSG53860 | emb2737   | 1004.6217 | 900.2565 | 1040.425 | 849.9885 | 867.8321 | 819.4031 | 1046.71  | 961.2909 | 1126.588 | 1039.177 | 1117.481 | 1051.445 | -0.25641  | 0.018041 | 0.046059  | 0.748029 | 0.077603  | 0.719342 |
| ATSG53870 | ENOD11    | 20.21137  | 10.70548 | 16.73951 | 18.97112 | 16.56168 | 15.94945 | 22.49225 | 24.1978  | 32.04303 | 23.4299  | 19.19071 | 23.94601 | 0.07303   | 0.88989  | 0.489024  | 0.281827 | 0.142505  | 0.879636 |
| ATSG53880 | ATSG53880 | 293.6593  | 317.5958 | 307.7494 | 379.4223 | 437.2284 | 298.9522 | 424.1978 | 320.4303 | 1077.776 | 339.6756 | 534.7943 | 473.4093 | 0.243801  | 0.629314 | 0.864049  | 0.051385 | 0.481158  | 0.517788 |
| ATSG53890 | PSKR2     | 147.4424  | 148.0924 | 119.7519 | 84.95761 | 92.74542 | 110.6493 | 109.3843 | 154.2813 | 108.3633 | 116.1038 | 81.15037 | 124.3088 | -0.51798  | 0.026973 | -0.15427  | 0.595753 | -0.34238  | 0.375703 |
| ATSG53895 | ATSG53895 | 1.18904   | 1.784246 | 1.287654 | 4.948987 | 3.974804 | 1.993682 | 1.778607 | 1.07889  | 8.909968 | 0.995936 | 2.660668 | 3.10772  | 0.703612  | 0.310409 | 0.631139  | 0.396518 | 0.477153  | NA       |
| ATSG53900 | ATSG53900 | 227.0807  | 271.2054 | 265.2568 | 277.1433 | 252.4    | 253.1976 | 298.806  | 264.328  | 220.6316 | 254.2769 | 211.5231 | 257.9407 | 0.042732  | 0.846063 | 0.042716  | 0.858151 | -0.06689  | 0.866401 |
| ATSG53902 | U3B       | 0         | 0        | 0        | 0        | 0        | 0        | 0        | 0        | 0        | 0        | 0        | 0        | #N/A      | #N/A     | #N/A      | #N/A     | #N/A      | #N/A     |
| ATSG53905 | ATSG53905 | 0         | 0        | 0        | 0        | 0        | 0        | 0        | 0        | 0        | 0        | 0        | 0        | #N/A      | #N/A     | #N/A      | #N/A     | #N/A      | #N/A     |
| ATSG53910 | ATSG53910 | 0         | 0        | 0        | 0        | 0        | 0        | 0.889303 | 0        | 0        | 0        | 0        | 0        | 0         | NA       | 0.160764  | NA       | 0         | NA       |
| ATSG53920 | ATSG53920 | 22.58917  | 26.76369 | 21.89012 | 44.12847 | 49.02258 | 46.85152 | 34.68284 | 46.39227 | 39.04984 | 23.02886 | 31.92802 | 27.96948 | 0.91997   | 0.002788 | 0.703702  | 0.038137 | 0.194642  | 0.783534 |
| ATSG53930 | ATSG53930 | 218.7583  | 248.0102 | 194.4358 | 179.4008 | 178.8662 | 235.2544 | 206.3184 | 227.6458 | 277.2539 | 235.0862 | 220.8354 | 205.109  |           |          |           |          |           |          |

|           |           |          |          |          |          |          |           |          |          |          |          |          |           |          |          |          |          |          |          |
|-----------|-----------|----------|----------|----------|----------|----------|-----------|----------|----------|----------|----------|----------|-----------|----------|----------|----------|----------|----------|----------|
| ATSG54300 | ATSG54300 | 92.73451 | 117.7602 | 99.14938 | 129.4985 | 116.5942 | 120.6177  | 89.81965 | 112.2046 | 139.6032 | 107.468  | 107.7571 | 104.6266  | 0.25204  | 0.278022 | 0.14581  | 0.590723 | 0.056018 | 0.917438 |
| ATSG54310 | AGD5      | 815.5881 | 854.6538 | 839.5506 | 864.8355 | 868.4946 | 826.381   | 813.7127 | 803.773  | 689.2297 | 711.0159 | 734.3444 | 754.14    | 0.030412 | 0.834291 | -0.11969 | 0.369914 | -0.18809 | 0.299464 |
| ATSG54320 | ATSG54320 | 0        | 0        | 0        | 0.412416 | 0        | 0         | 0.889303 | 0        | 0        | 0        | 0        | 0         | 0.066991 | NA       | 0.136991 | NA       | 0        | NA       |
| ATSG54330 | ATSG54330 | 0        | 0        | 0        | 0        | 0        | 0         | 0        | 0        | 0        | 0        | 0        | 0         | #N/A     | #N/A     | #N/A     | #N/A     | #N/A     | #N/A     |
| ATSG54340 | ATSG54340 | 0        | 0        | 0        | 0        | 0        | 0         | 0.889303 | 0        | 0        | 0        | 0        | 0         | 0        | NA       | 0.160764 | NA       | 0        | NA       |
| ATSG54350 | ATSG54350 | 0        | 0        | 0        | 0        | 0.996841 | 0.889303  | 0        | 0        | 0        | 1.330334 | 0        | 0         | 0.132565 | NA       | 0.142566 | NA       | 0.186757 | NA       |
| ATSG54360 | ATSG54360 | 1.188904 | 0        | 0        | 0.662467 | 0        | 0         | 0        | 0        | 0        | 0        | 0        | 0         | -0.07436 | NA       | -0.18968 | NA       | -0.18606 | NA       |
| ATSG54365 | ATSG54365 | 0        | 0        | 0        | 0        | 0        | 0         | 0        | 0        | 0        | 0        | 0        | 0         | #N/A     | #N/A     | #N/A     | #N/A     | #N/A     | #N/A     |
| ATSG54370 | ATSG54370 | 0        | 0        | 0        | 0        | 0        | 0         | 0.889303 | 0        | 0        | 0        | 0        | 0         | 0        | NA       | 0.160764 | NA       | 0        | NA       |
| ATSG54375 | ATSG54375 | 1.188904 | 0        | 0        | 0        | 0        | 0         | 0        | 0        | 0        | 0        | 0        | 0         | -0.2184  | NA       | -0.20558 | NA       | -0.19918 | NA       |
| ATSG54380 | THE1      | 530.2512 | 454.9827 | 417.2    | 357.5643 | 310.6972 | 556.2372  | 438.4266 | 609.5728 | 447.1207 | 464.4152 | 528.1426 | 413.3267  | -0.19554 | 0.46096  | 0.087405 | 0.777927 | 0.001423 | 0.998089 |
| ATSG54390 | AHL       | 1094.981 | 872.4963 | 1015.959 | 938.6578 | 781.0489 | 870.242   | 1060.05  | 1062.707 | 996.7472 | 1386.529 | 1354.28  | 1237.908  | -0.20409 | 0.142243 | 0.060278 | 0.727523 | 0.407478 | 0.013079 |
| ATSG54400 | ATSG54400 | 4.755616 | 1.784246 | 2.575309 | 12.78488 | 12.58688 | 13.95577  | 8.003731 | 7.55223  | 6.833722 | 4.797678 | 13.30334 | 2.071813  | 1.465029 | 0.007608 | 0.788656 | 0.218831 | 0.618596 | 0        |
| ATSG54410 | ATSG54410 | 0        | 0        | 0        | 0.412416 | 0        | 0         | 0.889303 | 0        | 0        | 0        | 0        | 0         | 0.066991 | NA       | 0.136991 | NA       | 0        | NA       |
| ATSG54420 | ATSG54420 | 0        | 0        | 0        | 0        | 0        | 0         | 0        | 0        | 0        | 0        | 0        | 0         | #N/A     | #N/A     | #N/A     | #N/A     | #N/A     | #N/A     |
| ATSG54430 | ATPHO532  | 480.3172 | 515.6471 | 515.0617 | 739.4611 | 852.5954 | 661.9023  | 627.8483 | 562.1017 | 841.524  | 458.658  | 540.1156 | 501.3788  | 0.567586 | 0.001022 | 0.419525 | 0.022991 | -0.01109 | 0.983524 |
| ATSG54440 | TRS130    | 523.1177 | 458.5512 | 463.5556 | 273.0191 | 244.4504 | 3121.9796 | 345.4994 | 391.637  | 238.204  | 403.005  | 360.5205 | 401.9317  | -0.77089 | 0.000029 | -0.55681 | 0.004282 | -0.30308 | 0.325972 |
| ATSG54450 | ATSG54450 | 0        | 0        | 0        | 0.412416 | 0        | 0         | 0.889303 | 0        | 0.676246 | 0        | 0        | 0         | 0.018186 | NA       | 0.544107 | NA       | 0.360591 | NA       |
| ATSG54460 | ATSG54460 | 1.188904 | 0        | 0        | 0        | 0        | 0         | 0        | 0        | 0        | 0        | 0        | 0         | -0.2184  | NA       | -0.20558 | NA       | -0.19918 | NA       |
| ATSG54470 | ATSG54470 | 89.1678  | 108.839  | 112.0259 | 71.76031 | 70.22153 | 73.76622  | 31.12562 | 25.89336 | 32.21612 | 75.80331 | 105.0964 | 108.7702  | -0.50048 | 0.029934 | -1.69931 | 2.08E-12 | -0.09466 | 0.856796 |
| ATSG54480 | ATSG54480 | 0        | 0        | 0        | 0        | 0        | 0         | 0        | 0        | 0        | 0        | 0        | 0.2071813 | 0        | 0        | 0        | 0        | 0.262302 | 0        |
| ATSG54490 | PBP1      | 14.26685 | 23.1952  | 14.1642  | 91.14384 | 105.9948 | 112.643   | 90.70896 | 121.9146 | 198.1779 | 9.595356 | 3.991002 | 16.5745   | 2.360387 | 6.01E-12 | 2.745331 | 7.68E-16 | -0.57267 | 0.427271 |
| ATSG54500 | FQR1      | 454.1613 | 462.1197 | 445.5284 | 880.0948 | 796.2857 | 856.2862  | 750.5721 | 859.8753 | 1078.752 | 465.3748 | 530.8033 | 417.4703  | 0.880589 | 8.67E-09 | 0.964976 | 2.8E-10  | 0.050709 | 0.896855 |
| ATSG54510 | GHS.6     | 559.9738 | 333.654  | 488.021  | 400.4555 | 374.9565 | 512.3762  | 498.0099 | 489.816  | 336.8049 | 413.5599 | 428.3675 | 448.5475  | -0.10693 | 0.692033 | -0.06429 | 0.831868 | -0.10087 | 0.837969 |
| ATSG54520 | ATSG54520 | 77.27876 | 37.46917 | 52.79383 | 42.4788  | 40.4105  | 49.84204  | 43.57587 | 48.55005 | 39.04984 | 42.21957 | 42.57069 | 46.61579  | -0.35738 | 0.244721 | -0.36384 | 0.273267 | -0.35803 | 0.484078 |
| ATSG54530 | ATSG54530 | 20.21137 | 16.05821 | 16.73951 | 14.43455 | 15.8921  | 16.94629  | 15.11816 | 11.86779 | 34.16861 | 34.54328 | 34.58868 | 35.22082  | -0.1781  | 0.726264 | 0.171006 | 0.753912 | 0.866672 | 0.134274 |
| ATSG54531 | ATSG54531 | 0        | 0        | 0        | 0        | 0        | 0         | 0        | 0        | 0        | 0        | 0        | 0         | #N/A     | #N/A     | #N/A     | #N/A     | #N/A     | #N/A     |
| ATSG54540 | ATSG54540 | 1745.311 | 1914.496 | 1815.593 | 1514.39  | 1927.117 | 1563.046  | 1795.504 | 1704.646 | 2175.076 | 1767.465 | 1580.437 | 1770.364  | -0.12745 | 0.445607 | 0.051764 | 0.793444 | -0.09483 | 0.750036 |
| ATSG54550 | ATSG54550 | 0        | 1.784246 | 0        | 0        | 0.662467 | 0         | 0        | 0        | 1.919071 | 0        | 0        | 0         | -0.14199 | NA       | -0.25259 | NA       | 0.074259 | NA       |
| ATSG54560 | ATSG54560 | 0        | 0        | 0        | 0.412416 | 0        | 0         | 1.07889  | 0.976246 | 0        | 0        | 0        | 2.071813  | 0.041336 | NA       | 0.328312 | NA       | 0.340086 | NA       |
| ATSG54569 | ATSG54569 | 8.322328 | 7.136984 | 1.287654 | 4.124156 | 9.274542 | 2.990522  | 9.782338 | 2.15778  | 12.6912  | 8.635821 | 2.660668 | 9.323159  | -0.01904 | 0.981235 | 0.398011 | 0.589717 | 0.225818 | NA       |
| ATSG54570 | BGLU41    | 11.88904 | 12.48972 | 14.1642  | 6.186234 | 11.26194 | 13.95577  | 17.78607 | 11.86779 | 12.6912  | 12.47396 | 9.312338 | 13.46678  | -0.31585 | 0.55821  | 0.126765 | 0.841414 | -0.09535 | NA       |
| ATSG54580 | ATSG54580 | 173.58   | 174.8561 | 187.9975 | 192.5981 | 144.4179 | 132.5798  | 156.5174 | 187.7268 | 249.919  | 185.1904 | 102.4357 | 210.289   | -0.17604 | 0.577368 | 0.139721 | 0.684252 | -0.09535 | 0.878429 |
| ATSG54585 | ATSG54585 | 305.5483 | 328.3013 | 324.4889 | 91.54814 | 109.3071 | 58.81361  | 84.48383 | 67.97007 | 114.2208 | 480.7273 | 606.6323 | 384.3213  | -1.79304 | 5.39E-15 | -1.79299 | 5.12E-14 | 0.597086 | 0.07143  |
| ATSG54590 | CLRK1     | 133.1572 | 148.0924 | 136.4914 | 104.7536 | 87.44568 | 92.70619  | 103.1592 | 89.54786 | 90.79088 | 168.8783 | 146.3367 | 151.2424  | -0.52504 | 0.004589 | -0.53743 | 0.006247 | 0.165665 | 0.637544 |
| ATSG54600 | RPL24     | 3192.207 | 3607.745 | 3821.758 | 3683.283 | 3648.87  | 3195.872  | 3835.566 | 3516.102 | 4546.378 | 480.1152 | 5342.621 | 4809.714  | -0.01189 | 0.950326 | 0.162064 | 0.306519 | 0.488452 | 0.002907 |
| ATSG54610 | ANK       | 423.2498 | 438.9245 | 454.542  | 792.2503 | 700.8904 | 720.7159  | 155.6281 | 137.019  | 106.4108 | 199.5834 | 155.6491 | 243.438   | -0.07825 | 1.24E-05 | -1.67826 | 4.33E-22 | -1.10449 | 8.39E-09 |
| ATSG54620 | ATSG54620 | 0        | 1.784246 | 1.287654 | 0.824831 | 1.324935 | 0.996841  | 0        | 1.07889  | 0.976246 | 0        | 0        | 0         | 0.095897 | NA       | -0.13201 | NA       | -0.53097 | NA       |
| ATSG54630 | ATSG54630 | 521.9288 | 629.8388 | 503.4728 | 382.3092 | 345.8079 | 351.8848  | 290.8022 | 317.1936 | 374.8785 | 479.7678 | 472.2686 | 509.666   | -0.59985 | 2.43E-05 | -0.73678 | 2.81E-07 | -0.17122 | 0.518366 |
| ATSG54640 | RAT5      | 153.3686 | 151.6609 | 158.3815 | 254.8728 | 294.7979 | 161.4882  | 164.5211 | 141.3346 | 290.9211 | 138.1731 | 118.3997 | 154.3501  | 0.590973 | 0.400018 | 0.354493 | 0.288932 | -0.16202 | 0.788881 |
| ATSG54650 | FHS       | 97.49012 | 73.15509 | 93.99877 | 61.44992 | 80.15854 | 119.6209  | 98.71269 | 103.5734 | 70.28971 | 80.60099 | 59.86503 | 81.83662  | -0.04997 | 0.89456  | 0.04314  | 0.93877  | -0.23932 | 0.66497  |
| ATSG54660 | HSP21.7   | 54.68958 | 57.09587 | 69.53333 | 57.32576 | 62.27192 | 56.81992  | 55.13682 | 47.47116 | 73.21845 | 67.16749 | 55.87403 | 52.83123  | -0.0396  | 0.908112 | -0.04205 | 0.908949 | -0.03954 | 0.955602 |
| ATSG54661 | ATSG54661 | 0        | 1.287654 | 0        | 0        | 0.996841 | 0         | 1.07889  | 0        | 1.07889  | 0        | 0        | 1.035907  | -0.08451 | NA       | -0.04574 | NA       | -0.04008 | NA       |
| ATSG54670 | ATK3      | 129.5905 | 105.2705 | 118.4642 | 104.3411 | 119.2441 | 91.70935  | 115.6095 | 99.25787 | 80.05217 | 149.6876 | 139.6851 | 161.6014  | -0.16159 | 0.502944 | -0.25891 | 0.291386 | 0.33724  | 0.310323 |
| ATSG54680 | ILR3      | 801.3213 | 795.7377 | 739.1136 | 686.2595 | 813.5098 | 674.8612  | 661.6418 | 721.7774 | 7.406822 | 782.9811 | 856.7351 | 696.1292  | -0.10121 | 0.524238 | -0.13163 | 0.420502 | -0.00143 | 0.936683 |
| ATSG54690 | GAU112    | 27.34479 | 32.11643 | 15.45185 | 15.29938 | 12.58688 | 15.94945  | 18.67537 | 15.10446 | 8.099968 | 22.06932 | 17.29434 | 23.82585  | -0.67233 | 0.107998 | -0.72207 | 0.108567 | -0.18813 | 0.898801 |
| ATSG54700 | ATSG54700 | 0        | 0        | 0        | 2.474493 | 1.324935 | 4.984204  | 0.889303 | 1.07889  | 0        | 0        | 0        | 0         | 1.259888 | 0.02761  | 0.320524 | 0.639735 | 0        | NA       |
| ATSG54710 | ATSG54710 | 167.6355 | 153.4452 | 150.6556 | 423.1384 | 384.8935 | 467.5183  | 457.102  | 482.2638 | 355.3535 | 105.5489 | 145.0064 | 119.1293  | 1.399333 | 2.37E-16 | 1.421704 | 1.31E-16 | -0.35439 | 0.255713 |
| ATSG54720 | ATSG54720 | 34.47821 | 32.11643 | 32.19136 | 65.98649 | 37.85883 | 73.76622  | 54.24751 | 92.78453 | 37.09735 | 29.7456  | 43.90102 | 16.5745   | 0.717246 | 0.082351 | 0.792098 | 0.062499 | -0.13343 | 0.889374 |
| ATSG54730 | ATG18F    | 312.6817 | 319.38   | 266.5444 | 334.8814 | 312.0221 | 386.7742  | 417.9726 | 445.5815 | 336.8049 | 294.5774 | 268.7275 | 246.5458  | 0.196442 | 0.291977 | 0.412012 | 0.019031 | -0.144   | 0.665591 |
| ATSG54740 | SEAS4     | 0        | 1.784246 | 0        | 0        | 0.662467 | 0         | 0.889303 | 0.31556  | 0.976246 | 0        | 0        | 0.103607  | -0.23002 | NA       | 0.640872 | NA       | -0.09449 | NA       |
| ATSG54745 | DEGP15    | 0        | 0        | 0        | 0        | 0        | 0         | 0        | 0        | 0        | 0        | 0        | 0         | #N/A     | #N/A     | #N/A     | #N/A     | #N/A     | #N/A     |
| ATSG54750 | ATSG54750 | 228.2696 | 276.5581 | 274.2704 | 392.2072 | 402.7801 | 317.9922  | 314.8134 | 275.1169 | 436.382  | 278.2653 | 368.5025 | 240.3303  | 0.503875 | 0.023498 | 0.38795  | 0.106714 | 0.1793   | 0.67904  |
| ATSG54760 | ATSG54760 | 879.7889 | 808.2635 | 795.7704 | 1112.285 | 1171.242 | 893.1693  | 918.6505 | 791.9052 | 1044.583 | 965.2928 | 1245.193 | 1015.188  | 0.349862 | 0.039917 | 0.146609 | 0.468526 | 0.368123 | 0.126694 |
| ATSG54770 | THH1      | 19142.54 | 17776.44 | 16360.94 | 9315.231 | 9119.524 | 9167.945  | 16411.21 | 17920.36 | 2915.641 | 17204.47 | 16617.2  | 1789.114  | -0.92564 | 4.75E-07 | 0.246745 | 0.264886 | -0.04202 | 0.931352 |
| ATSG54780 | ATSG54780 | 79.65566 | 99.91778 | 103.0123 | 160.8421 | 181.516  | 163.4819  | 138.7313 | 96.0212  | 113.2445 | 79.64146 | 102.4357 | 65.26211  | 0.821093 | 0.0001   |          |          |          |          |

|           |           |          |          |          |          |          |          |          |          |          |          |          |          |          |          |          |          |          |          |
|-----------|-----------|----------|----------|----------|----------|----------|----------|----------|----------|----------|----------|----------|----------|----------|----------|----------|----------|----------|----------|
| ATSG55200 | ATSG55200 | 54.68958 | 60.66437 | 50.21852 | 83.30795 | 86.78321 | 64.79465 | 101.3806 | 79.83786 | 94.69586 | 54.69353 | 57.20436 | 76.65708 | 0.50429  | 0.04808  | 0.71805  | 0.004735 | 0.187776 | 0.718915 |
| ATSG55210 | ATSG55210 | 230.6474 | 190.9143 | 234.3531 | 314.2607 | 367.0069 | 267.1533 | 300.5846 | 268.6436 | 315.3275 | 279.2249 | 411.0732 | 229.9712 | 0.512802 | 0.022217 | 0.413052 | 0.086227 | 0.462068 | 0.161832 |
| ATSG55220 | TIG       | 1933.158 | 1909.143 | 2110.465 | 1254.568 | 1305.061 | 1464.359 | 1930.678 | 1901.004 | 1798.245 | 2286.573 | 2216.336 | 2522.432 | -0.5632  | 1.09E-07 | -0.08027 | 0.564424 | 0.237035 | 0.188922 |
| ATSG55230 | MAP65-1   | 1444.518 | 1430.965 | 1295.38  | 831.0174 | 897.6432 | 1027.743 | 947.1082 | 1112.336 | 942.0774 | 1477.685 | 1414.145 | 1398.474 | -0.59449 | 1.06E-06 | -0.47006 | 0.0002   | 0.040966 | 0.891191 |
| ATSG55240 | PKG2      | 0        | 0        | 0        | 0.412416 | 0.662467 | 0        | 0        | 0        | 0        | 0        | 1.330334 | 0        | 0.213241 | NA       | 0        | NA       | 0.204858 | NA       |
| ATSG55250 | IAMT1     | 13.07794 | 21.41095 | 20.60247 | 10.7228  | 10.59948 | 4.984204 | 3.557214 | 7.55223  | 0.976246 | 19.19071 | 14.63367 | 11.39497 | -0.83087 | 0.090037 | -1.69339 | 0.000838 | -0.2167  | NA       |
| ATSG55260 | PPX2      | 147.4241 | 246.226  | 224.0519 | 173.2145 | 204.7024 | 141.5514 | 209.8756 | 178.0168 | 170.843  | 195.7453 | 267.3971 | 222.7199 | -0.22763 | 0.372098 | -0.12975 | 0.057257 | 0.150882 | 0.744677 |
| ATSG55270 | ATSG55270 | 1.188904 | 0        | 1.287654 | 4.948987 | 10.59948 | 6.977885 | 6.225124 | 8.63112  | 7.809968 | 0        | 1.330334 | 0        | 1.645358 | 0.006622 | 1.628305 | 0.009222 | -0.31897 | NA       |
| ATSG55280 | F2S21     | 766.843  | 692.2875 | 775.1679 | 621.5103 | 671.7418 | 608.0729 | 655.4167 | 589.0739 | 666.776  | 696.6229 | 893.9844 | 733.4218 | -0.23164 | 0.106319 | -0.22401 | 0.139711 | 0.050979 | 0.871867 |
| ATSG55290 | VHA-E1    | 82.03437 | 108.839  | 121.0395 | 161.6669 | 188.8032 | 132.5798 | 185.8644 | 91.70564 | 172.7955 | 129.5373 | 199.5501 | 187.4991 | 0.603215 | 0.036491 | 0.507088 | 0.100996 | 0.687426 | 0.082295 |
| ATSG55300 | TOP1      | 797.7545 | 747.5991 | 670.8679 | 595.9405 | 582.9712 | 679.8454 | 700.7711 | 728.2507 | 611.13   | 743.6401 | 784.897  | 725.1346 | -0.25445 | 0.062845 | -0.11854 | 0.460573 | 0.022915 | 0.948017 |
| ATSG55310 | TOP1BETA  | 535.0068 | 587.0169 | 557.5543 | 608.313  | 555.1476 | 611.0634 | 714.1107 | 759.5385 | 509.6004 | 556.5307 | 565.3919 | 531.42   | 0.079304 | 0.6894   | 0.236934 | 0.190071 | -0.02124 | 0.961326 |
| ATSG55320 | AT7       | 0        | 0        | 0        | 0        | 0        | 0        | 0        | 0        | 0.959536 | 0        | 1.035907 | 0        | 0        | NA       | 0        | NA       | 0.332992 | NA       |
| ATSG55330 | AT6       | 2.377808 | 1.784246 | 1.287654 | 3.71174  | 1.987402 | 0        | 0.889303 | 1.07889  | 2.928738 | 2.878607 | 1.330334 | 4.143626 | 0.094536 | 0.911394 | -0.0833  | 0.925949 | 0.313491 | NA       |
| ATSG55340 | AT5       | 7.133424 | 5.352738 | 6.438272 | 16.08421 | 14.57428 | 11.96209 | 15.11816 | 16.59618 | 14.39303 | 13.30334 | 9.323159 | 0        | 0.935684 | 0.057119 | 0.849121 | 0.110565 | 0.729309 | NA       |
| ATSG55350 | AT4       | 0        | 0        | 1.287654 | 0        | 0.662467 | 0.996841 | 0        | 1.07889  | 0        | 0        | 0        | 0        | 0.050599 | NA       | -0.04697 | NA       | -0.23852 | NA       |
| ATSG55360 | AT3       | 0        | 0        | 0        | 0.412416 | 0        | 0        | 0        | 0        | 0        | 0        | 0        | 0        | 0.095918 | NA       | 0        | NA       | 0        | NA       |
| ATSG55370 | AT2       | 2.377808 | 0        | 0        | 0        | 0        | 0        | 0        | 1.07889  | 0.976246 | 0        | 0        | 0        | -0.45161 | NA       | -0.05348 | NA       | -0.406   | NA       |
| ATSG55380 | AT1       | 32.10041 | 30.33218 | 25.75309 | 14.84696 | 15.89921 | 14.95261 | 11.56095 | 8.63112  | 16.59618 | 31.66468 | 23.94601 | 26.93357 | -0.86438 | 0.016876 | -1.12025 | 0.003857 | -0.07281 | 0.935568 |
| ATSG55390 | EDM2      | 517.1732 | 567.3902 | 460.9803 | 364.5754 | 300.0977 | 450.572  | 493.5634 | 481.1849 | 278.2031 | 506.6348 | 432.3585 | 475.4811 | -0.15763 | 0.048725 | -0.29118 | 0.258484 | -0.1211  | 0.802274 |
| ATSG55400 | FIM3      | 173.58   | 103.4863 | 141.642  | 109.2901 | 120.569  | 133.767  | 119.1667 | 117.599  | 92.74337 | 154.4852 | 152.9884 | 184.3914 | -0.22357 | 0.354536 | -0.35103 | 0.150584 | 0.211081 | 0.597213 |
| ATSG55410 | ATSG55410 | 0        | 0        | 0        | 1.237247 | 2.649869 | 2.950522 | 3.358221 | 3.23667  | 4.88123  | 0        | 0        | 0        | 0.99132  | 0.132758 | 1.63963  | 0.008531 | 0        | NA       |
| ATSG55420 | ATSG55420 | 0        | 0        | 0        | 23.9201  | 15.89921 | 14.95261 | 11.56095 | 16.18335 | 27.33489 | 0.959536 | 0        | 1.035907 | 2.992023 | 4.25E-08 | 2.948965 | 9.25E-08 | 0        | NA       |
| ATSG55430 | ATSG55430 | 1.188904 | 0        | 1.287654 | 0.412416 | 0        | 1.993682 | 0        | 0        | 0        | 0        | 0        | 1.035907 | -0.03406 | NA       | -0.46623 | NA       | -0.24301 | NA       |
| ATSG55440 | ATSG55440 | 0        | 0        | 0        | 3.299325 | 3.974804 | 0        | 0        | 1.07889  | 0.976246 | 0        | 0        | 0        | 1.037128 | NA       | 0.299496 | NA       | 0        | NA       |
| ATSG55450 | ATSG55450 | 173.58   | 272.9896 | 211.1753 | 859.8865 | 753.8878 | 618.0413 | 426.8657 | 392.7159 | 660.9185 | 90.19635 | 114.4087 | 76.65708 | 1.705924 | 4.59E-14 | 1.132446 | 1.48E-06 | -1.16328 | 5.69E-05 |
| ATSG55460 | ATSG55460 | 30.9115  | 53.52738 | 45.0679  | 168.678  | 190.1281 | 122.6114 | 158.296  | 138.0979 | 169.8668 | 18.23118 | 21.28534 | 24.86176 | 1.846304 | 6.12E-14 | 1.791627 | 6.96E-13 | -0.8947  | 0.802274 |
| ATSG55470 | NHX4      | 21.40027 | 14.27397 | 15.45185 | 14.43455 | 6.624763 | 16.94629 | 20.45398 | 22.65669 | 13.66744 | 18.23118 | 22.61568 | 19.68222 | -0.40841 | 0.393654 | 0.114962 | 0.844522 | 0.190789 | 0.842163 |
| ATSG55480 | GDPDL4    | 330.5153 | 235.5205 | 220.1889 | 120.4253 | 113.2819 | 153.5135 | 122.7239 | 118.6779 | 85.90965 | 242.7625 | 267.3971 | 223.7558 | -1.00568 | 9.7E-07  | -1.22781 | 4.38E-09 | -0.10272 | 0.83094  |
| ATSG55490 | GEX1      | 43.98945 | 26.76369 | 23.17728 | 40.00431 | 44.38531 | 38.87679 | 34.68284 | 31.28781 | 41.00233 | 33.58373 | 35.91902 | 40.40035 | 0.348061 | 0.307636 | 0.154237 | 0.712647 | 0.188375 | 0.780918 |
| ATSG55500 | XYLT      | 257.9922 | 281.9109 | 258.8185 | 276.7309 | 225.2389 | 249.2102 | 233.8868 | 240.5925 | 215.7504 | 261.9532 | 275.3791 | 214.4327 | -0.07932 | 0.688924 | -0.20397 | 0.279636 | -0.08544 | 0.809635 |
| ATSG55505 | ATSG55505 | 0        | 0        | 0        | 0        | 0        | 0        | 0        | 0        | 0        | 0        | 0        | 0        | NA       | NA       | NA       | NA       | NA       | NA       |
| ATSG55507 | ATSG55507 | 0        | 0        | 0        | 0.412416 | 0        | 0        | 0        | 0        | 0        | 1.919071 | 0        | 0        | 0.060903 | NA       | 0        | NA       | 0.281656 | NA       |
| ATSG55508 | ATSG55508 | 0        | 0        | 0        | 0        | 0        | 0        | 0        | 0        | 0        | 0        | 0        | 0        | NA       | NA       | NA       | NA       | NA       | NA       |
| ATSG55510 | TIM22-3   | 85.60108 | 107.0548 | 93.99877 | 99.39215 | 127.1937 | 64.79465 | 88.93035 | 76.60119 | 155.2231 | 89.23681 | 95.78405 | 107.7343 | 0.037308 | 0.927068 | 0.15911  | 0.680308 | 0.033706 | 0.967287 |
| ATSG55520 | ATSG55520 | 135.535  | 128.4657 | 108.163  | 160.4297 | 126.5312 | 127.5956 | 139.2606 | 129.4668 | 89.81463 | 142.0113 | 167.6221 | 120.1652 | 0.15946  | 0.550812 | -0.04926 | 0.879853 | 0.196007 | 0.655184 |
| ATSG55530 | ATSG55530 | 441.0833 | 333.654  | 400.4605 | 612.0247 | 699.5654 | 604.0855 | 739.9005 | 667.2529 | 672.6335 | 440.4269 | 546.7673 | 373.9623 | 0.686375 | 0.000226 | 0.183222 | 4.92E-07 | 0.098107 | 0.52019  |
| ATSG55540 | TRN1      | 407.7941 | 317.5958 | 329.6395 | 477.6448 | 515.2693 | 177.4377 | 201.8211 | 196.358  | 112.2683 | 269.6295 | 344.5565 | 295.2334 | -1.22611 | 1.4E-08  | -1.08667 | 9.16E-07 | -0.21197 | 0.618208 |
| ATSG55550 | ATSG55550 | 209.2471 | 173.0719 | 207.3123 | 207.445  | 243.1255 | 213.3239 | 179.8756 | 182.3324 | 205.0117 | 220.6932 | 199.5501 | 212.3608 | 0.158521 | 0.382864 | 0.011342 | 0.961781 | 0.093695 | 0.788881 |
| ATSG55560 | WNK11     | 11.88904 | 24.97944 | 15.45185 | 107.6405 | 100.695  | 83.73463 | 74.70149 | 77.80008 | 79.07593 | 15.35257 | 19.95501 | 18.64632 | 2.381801 | 1.4E-16  | 2.038664 | 7.28E-12 | 0.060752 | 0.949285 |
| ATSG55565 | ATSG55565 | 1.188904 | 0        | 0        | 0        | 0        | 0        | 0        | 0        | 0        | 0        | 0        | 0        | -0.2184  | NA       | -0.20588 | NA       | -0.19918 | NA       |
| ATSG55570 | ATSG55570 | 3.566712 | 7.136984 | 9.01358  | 1.649662 | 0.662467 | 0.996841 | 7.114428 | 5.39445  | 7.809968 | 14.39303 | 11.97301 | 14.50269 | -1.54502 | 0.007112 | 0.064032 | 0.934699 | 0.905943 | NA       |
| ATSG55580 | ATSG55580 | 252.5364 | 249.7944 | 292.2975 | 156.7179 | 132.4935 | 141.5514 | 256.1194 | 240.5925 | 145.4607 | 269.6295 | 256.7545 | 270.3716 | -0.83756 | 3.63E-05 | -0.28115 | 0.239613 | 0.021691 | 0.970574 |
| ATSG55590 | QRT1      | 2.377808 | 1.784246 | 0        | 1.649662 | 1.324935 | 1.993682 | 0.889303 | 2.15778  | 0        | 0.959536 | 2.660668 | 0        | 0.125724 | 0.768986 | -0.16706 | 0.841208 | -0.09296 | NA       |
| ATSG55600 | ATSG55600 | 554.1613 | 501.3731 | 467.4185 | 446.2337 | 412.7171 | 521.3477 | 493.5634 | 565.3383 | 342.6623 | 439.4673 | 437.6799 | 416.4344 | -0.04407 | 0.856077 | -0.02062 | 0.938611 | -0.13302 | 0.722849 |
| ATSG55610 | ATSG55610 | 259.1811 | 262.2240 | 230.4901 | 353.4401 | 359.7197 | 311.0143 | 281.0139 | 308.5625 | 402.2133 | 283.063  | 336.5745 | 240.3303 | 0.439841 | 0.020484 | 0.391047 | 0.051869 | 0.186208 | 0.59714  |
| ATSG55620 | ATSG55620 | 61.09666 | 65.83868 | 63.22383 | 556.3486 | 551.1728 | 489.4488 | 337.046  | 249.2236 | 328.9949 | 684.1489 | 1176.015 | 608.0771 | -0.2417  | 0.344905 | -1.01577 | 4.79E-06 | 0.361804 | 0.32189  |
| ATSG55630 | TPK1      | 326.9486 | 346.1437 | 321.9136 | 268.895  | 292.8105 | 311.0143 | 218.7687 | 247.0658 | 268.4676 | 301.2942 | 349.8778 | 282.8025 | -0.18968 | 0.250557 | -0.43078 | 0.006284 | -0.09191 | 0.774901 |
| ATSG55640 | ATSG55640 | 85.60108 | 133.8318 | 108.163  | 156.3055 | 138.4557 | 105.6651 | 112.9415 | 114.3623 | 150.3419 | 120.9015 | 133.0334 | 1        |          |          |          |          |          |          |

|           |           |          |          |          |          |          |          |          |          |          |          |          |          |           |          |          |          |          |          |
|-----------|-----------|----------|----------|----------|----------|----------|----------|----------|----------|----------|----------|----------|----------|-----------|----------|----------|----------|----------|----------|
| ATSG56130 | THO3      | 71.33424 | 55.31163 | 99.14938 | 122.4874 | 98.04516 | 77.75358 | 96.93408 | 92.78453 | 80.05217 | 102.6703 | 78.4897  | 111.8779 | 0.384744  | 0.16895  | 0.229335 | 0.478488 | 0.349946 | 0.443857 |
| ATSG56140 | ATSG56140 | 618.2301 | 645.8971 | 601.3346 | 463.5551 | 456.44   | 453.5626 | 497.1206 | 486.5794 | 561.3414 | 474.0104 | 445.6619 | 467.1938 | -0.43507  | 0.000105 | -0.26733 | 0.029841 | -0.42048 | 0.003384 |
| ATSG56150 | UBC30     | 197.7359 | 171.2876 | 155.8062 | 305.1875 | 329.9087 | 226.2829 | 260.6559 | 251.3814 | 325.0899 | 311.2481 | 315.2892 | 321.1684 | 0.690689  | 0.00101  | 0.644857 | 0.003027 | 0.519057 | 0.088314 |
| ATSG56160 | SFH14     | 42.80054 | 28.54794 | 39.91728 | 25.56977 | 37.09817 | 42.86415 | 32.90423 | 46.39227 | 28.31113 | 36.46235 | 27.93701 | 47.6517  | -0.11792  | 0.781359 | -0.06846 | 0.886203 | 0.002965 | 0.997199 |
| ATSG56170 | LLG1      | 313.8706 | 283.6951 | 315.4753 | 383.9589 | 455.7775 | 384.7805 | 385.0684 | 391.637  | 487.1468 | 304.1728 | 315.2892 | 321.1317 | 0.413579  | 0.007073 | 0.458138 | 0.003460 | 0.037891 | 0.922957 |
| ATSG56180 | ARP8      | 206.8693 | 240.8732 | 182.8469 | 276.7309 | 259.0247 | 302.0428 | 354.8321 | 318.2725 | 236.2515 | 210.1383 | 186.2468 | 204.0736 | 0.404476  | 0.059943 | 0.523683 | 0.000683 | -0.05977 | 0.895904 |
| ATSG56190 | ATSG56190 | 274.6368 | 328.3013 | 306.4617 | 398.0505 | 394.8305 | 442.5973 | 449.0883 | 442.3449 | 301.66   | 291.6988 | 347.2172 | 300.4129 | 0.435297  | 0.017073 | 0.387022 | 0.044829 | 0.046346 | 0.919153 |
| ATSG56200 | ATSG56200 | 0        | 1.784246 | 3.862963 | 7.835996 | 9.274542 | 5.981045 | 7.119428 | 8.63112  | 4.88123  | 1.919071 | 0        | 0        | 1.321368  | 0.030975 | 1.146102 | 0.079775 | -0.49402 | NA       |
| ATSG56210 | WIP2      | 300.7927 | 349.7122 | 301.3111 | 233.0148 | 281.5486 | 283.1028 | 271.2376 | 256.7758 | 303.6125 | 329.1207 | 400.4305 | 322.1669 | -0.25238  | 0.144558 | -0.18576 | 0.334083 | 0.142565 | 0.646732 |
| ATSG56220 | ATSG56220 | 135.535  | 110.6233 | 124.9025 | 67.22374 | 66.90919 | 75.7599  | 57.80473 | 79.83786 | 55.64602 | 92.11542 | 77.15937 | 104.6266 | -0.81255  | 0.000118 | -0.92411 | 2.85E-05 | -0.42438 | 0.2094   |
| ATSG56230 | PRAI62    | 13.07794 | 7.136984 | 11.58889 | 16.49662 | 23.18635 | 6.977885 | 8.893035 | 19.42002 | 10.73871 | 3.838143 | 7.982004 | 2.071813 | 0.470897  | 0.411752 | 0.207348 | 0.7629   | -0.90991 | NA       |
| ATSG56240 | ATSG56240 | 588.5075 | 560.2533 | 480.2951 | 403.3424 | 382.9061 | 552.2498 | 522.0211 | 558.865  | 292.8738 | 447.1436 | 437.6799 | 479.6247 | -0.27665  | 0.278535 | -0.23733 | 0.388599 | -0.24616 | 0.560244 |
| ATSG56250 | HAP8      | 517.1732 | 444.2773 | 356.6803 | 439.635  | 461.7397 | 550.2561 | 393.0721 | 375.4537 | 239.1803 | 322.404  | 368.5025 | 293.1615 | 0.132504  | 0.605125 | -0.376   | 0.110338 | -0.41111 | 0.212111 |
| ATSG56260 | ATSG56260 | 326.9486 | 451.4142 | 359.2556 | 604.1888 | 573.0342 | 550.2561 | 397.5187 | 459.6071 | 508.6242 | 391.4905 | 445.6619 | 370.8545 | 0.602294  | 0.000125 | 0.266073 | 0.143121 | 0.090389 | 0.797319 |
| ATSG56270 | WRKY2     | 256.8033 | 173.0719 | 181.2516 | 168.2656 | 149.7176 | 183.4187 | 201.8719 | 217.9358 | 115.197  | 173.6759 | 188.9074 | 151.2424 | -0.28008  | 0.303874 | -0.18851 | 0.536435 | -0.24569 | 0.593966 |
| ATSG56280 | CSN6A     | 323.3819 | 333.654  | 333.5025 | 364.5754 | 384.231  | 393.7521 | 426.8657 | 332.2981 | 355.3535 | 385.7333 | 376.4845 | 309.7361 | 0.201299  | 0.224832 | 0.170508 | 0.346434 | 0.111916 | 0.719342 |
| ATSG56290 | PEX5      | 526.6844 | 562.0375 | 498.3222 | 396.3314 | 333.8835 | 404.7174 | 474.8881 | 545.9183 | 315.3275 | 514.3111 | 593.329  | 522.0969 | -0.47132  | 0.016423 | -0.24173 | 0.280845 | 0.037482 | 0.940115 |
| ATSG56300 | GAMT2     | 4.755616 | 7.136984 | 1.287654 | 2.886909 | 4.637271 | 1.993678 | 2.66791  | 2.15778  | 1.952492 | 5.757214 | 2.660668 | 5.179533 | -0.2444   | 0.749456 | -0.52904 | 0.478855 | 0.10053  | NA       |
| ATSG56310 | PCMP-E13  | 19.02246 | 17.84246 | 29.61605 | 22.27044 | 30.47349 | 26.9147  | 30.23632 | 35.60337 | 40.02609 | 21.10978 | 26.60668 | 24.86176 | 0.206726  | 0.620201 | 0.600874 | 0.114886 | 0.089763 | 0.920201 |
| ATSG56320 | EXPA14    | 3.566712 | 8.92123  | 3.862963 | 2.474493 | 3.312336 | 2.990522 | 3.57214  | 1.0889   | 0.952492 | 3.838143 | 2.660668 | 1.035907 | -0.5402   | 0.439767 | -0.78402 | 0.297827 | -0.64294 | NA       |
| ATSG56325 | ATSG56325 | 0        | 0        | 0        | 0        | 0.662467 | 0        | 0.889303 | 0        | 0        | 0        | 0        | 0        | 0.097058  | NA       | 0.130384 | NA       | 0        | NA       |
| ATSG56330 | ATAC48    | 0        | 0        | 0        | 0        | 0.662467 | 0        | 0.889303 | 0        | 0        | 0        | 0        | 0        | 0.097058  | NA       | 0.130384 | NA       | 0        | NA       |
| ATSG56340 | ATCRT1    | 261.5589 | 296.1848 | 266.5444 | 248.2742 | 302.7475 | 257.1849 | 292.5808 | 268.6436 | 378.7834 | 270.589  | 308.6375 | 279.6948 | -0.02497  | 0.916578 | 0.190421 | 0.356071 | 0.059464 | 0.884754 |
| ATSG56350 | ATSG56350 | 507.662  | 405.0238 | 453.2543 | 594.5701 | 629.3439 | 647.9465 | 595.8343 | 602.0206 | 445.1682 | 366.5426 | 432.3585 | 641.3314 | 0.402034  | 0.018132 | 0.257556 | 0.173894 | -0.23736 | 0.412762 |
| ATSG56360 | PSL4      | 70.4872  | 70.12087 | 70.17716 | 550.8971 | 565.0846 | 628.0097 | 528.2463 | 661.3595 | 606.2488 | 761.8713 | 719.7107 | 644.3339 | -0.25407  | 0.051376 | -0.26571 | 0.074967 | -0.01253 | 0.972983 |
| ATSG56365 | ATSG56365 | 0        | 0        | 0        | 0.412416 | 0        | 0        | 0        | 0        | 0        | 0        | 0        | 0        | 0.095918  | NA       | 0        | NA       | 0        | NA       |
| ATSG56367 | ATSG56367 | 2.377808 | 0        | 0        | 0        | 0        | 0        | 1.778607 | 1.07889  | 0.976246 | 0.959536 | 0        | 1.035907 | -0.58632  | 0.0      | 0.215782 | NA       | -0.07253 | NA       |
| ATSG56368 | ATSG56368 | 0        | 0        | 0        | 0        | 0        | 0        | 1.07889  | 0        | 0        | 0        | 0        | 0        | 0         | NA       | 0.16673  | NA       | 0        | NA       |
| ATSG56369 | ATSG56369 | 0        | 0        | 0        | 0        | 0.662467 | 0        | 0        | 0        | 0        | 0        | 0        | 0        | 0         | NA       | 0        | NA       | 0        | NA       |
| ATSG56370 | ATSG56370 | 28.53369 | 23.1952  | 24.46543 | 30.51875 | 33.78583 | 31.8989  | 17.78607 | 30.20892 | 24.40615 | 39.34096 | 31.92802 | 39.36445 | 0.297224  | 0.424229 | -0.09369 | 0.844342 | 0.496721 | 0.363749 |
| ATSG56380 | ATSG56380 | 309.115  | 314.0273 | 300.0235 | 206.2078 | 225.9013 | 243.2291 | 347.7177 | 272.9592 | 183.5342 | 317.6063 | 268.7275 | 353.2441 | -0.44049  | 0.048004 | -0.1908  | 0.468539 | 0.027624 | 0.962294 |
| ATSG56390 | ATSG56390 | 0        | 0        | 0        | 0        | 0.889303 | 0        | 0        | 0        | 0        | 0        | 0        | 0        | 0         | NA       | 0.160764 | NA       | 0        | NA       |
| ATSG56400 | ATSG56400 | 0        | 0        | 0        | 0        | 0        | 0        | 0        | 0        | 0        | 0.959536 | 0        | 1.035907 | 0         | NA       | 0        | NA       | 0.332992 | NA       |
| ATSG56410 | ATSG56410 | 0        | 0        | 0        | 0        | 0        | 0        | 1.07889  | 0        | 0        | 0        | 1.919071 | 0        | 0         | NA       | 0.149949 | NA       | 0.281514 | NA       |
| ATSG56420 | ATSG56420 | 79.65656 | 73.15409 | 78.54691 | 87.01969 | 109.9696 | 79.74726 | 112.0522 | 94.94231 | 82.00466 | 74.84378 | 82.48071 | 77.69299 | 0.249799  | 0.321515 | 0.308089 | 0.240673 | 0.013352 | 0.984857 |
| ATSG56430 | ATSG56430 | 0        | 0        | 1.287654 | 0        | 0        | 0        | 0        | 0        | 0.959536 | 1.330334 | 0        | 0        | -0.28579  | NA       | -0.2534  | NA       | 0.158085 | NA       |
| ATSG56440 | ATSG56440 | 0        | 0        | 0        | 0        | 0        | 0.889303 | 1.07889  | 0        | 0        | 0        | 0        | 0        | 0         | NA       | 0.3225   | NA       | 0        | NA       |
| ATSG56450 | ATSG56450 | 53.50068 | 60.66437 | 69.53333 | 50.3147  | 62.93439 | 63.79781 | 70.25498 | 62.57562 | 66.38473 | 64.28889 | 82.48071 | 80.80071 | -0.06805  | 0.830654 | 0.116027 | 0.723898 | 0.291964 | 0.507381 |
| ATSG56452 | ATSG56452 | 0        | 0        | 0        | 0.662467 | 0        | 0        | 0.889303 | 0        | 0        | 0        | 0        | 0        | 0.128567  | NA       | 0.0      | NA       | 0        | NA       |
| ATSG56460 | ATSG56460 | 76.08985 | 49.95889 | 52.79383 | 95.268   | 100.0326 | 103.6714 | 86.26244 | 97.10009 | 95.67211 | 63.32935 | 75.82904 | 65.26211 | 0.690892  | 0.00204  | 0.595795 | 0.013107 | 0.15548  | 0.75547  |
| ATSG56470 | GULL07    | 0        | 0        | 0        | 0        | 0        | 0.889303 | 0        | 0        | 0        | 0        | 0        | 0        | 0         | NA       | 0.160764 | NA       | 0        | NA       |
| ATSG56480 | ATSG56480 | 0        | 0        | 0        | 0        | 0        | 0.889303 | 0        | 0        | 0        | 0        | 0        | 1.035907 | 0         | NA       | 0.137906 | NA       | 0.15538  | NA       |
| ATSG56490 | GULL04    | 33.28931 | 29.25341 | 19.31482 | 35.46774 | 25.17376 | 30.92026 | 25.7898  | 28.05114 | 23.4299  | 23.02886 | 49.22236 | 35.22082 | 0.022532  | 0.963026 | -0.21062 | 0.653286 | 0.204793 | 0.78736  |
| ATSG56500 | CNP6083   | 277.0146 | 206.9725 | 225.3395 | 211.5692 | 238.4882 | 213.3239 | 233.8868 | 192.0424 | 198.1779 | 232.2076 | 234.1388 | 282.8025 | -0.10269  | 0.62415  | -0.10859 | 0.373113 | 0.070645 | 0.861835 |
| ATSG56510 | APUM12    | 1.188904 | 3.568492 | 3.862963 | 18.14629 | 12.58688 | 19.93682 | 32.01493 | 36.68226 | 24.40615 | 6.716749 | 2.660668 | 2.071813 | 1.857739  | 0.000186 | 2.65372  | 3.57E-08 | 0.213618 | NA       |
| ATSG56520 | ATSG56520 | 109.3792 | 137.3869 | 115.8889 | 125.3743 | 144.4179 | 125.6019 | 194.7575 | 157.5179 | 226.4891 | 159.2899 | 158.3097 | 166.781  | 0.130863  | 0.576206 | 0.617055 | 0.000558 | 0.417694 | 0.156714 |
| ATSG56530 | ATSG56530 | 181.9023 | 119.5445 | 110.7383 | 68.04857 | 77.50867 | 67.78517 | 60.47264 | 97.10009 | 98.60085 | 128.5778 | 94.45371 | 141.9192 | -0.91355  | 0.000376 | -0.66637 | 0.015419 | -0.16846 | 0.756204 |
| ATSG56540 | AGP14     | 1.188904 | 1.784246 | 2.474493 | 2.649869 | 4.984204 | 1.778607 | 1.07889  | 2.928738 | 3.838143 | 5.321336 | 3.10772  | 0        | -0.10043  | 0.903683 | -0.49742 | 0.514422 | 0.10092  | NA       |
| ATSG56544 | ATSG56544 | 1.188904 | 0        | 3.862963 | 3.299255 | 5.299738 | 0.996841 | 1.778607 | 1.07889  | 4.88123  | 0.660668 | 0        | 0        | 0.459481  | 0.532807 | 0.246544 | 0.768783 | -0.37956 | NA       |
| ATSG56550 | OXK3      | 73.71204 | 101.702  | 93.99877 | 137.7468 | 113.2819 | 181.425  | 202.7612 | 176.938  | 194.273  | 84.43914 | 98.44471 | 113.9497 | 0.656986  | 0.00421  | 1.06588  | 1.46E-06 | 0.142114 | 0.778834 |
| ATSG56560 | ATSG56560 | 0        | 0        | 0        | 0        | 0        | 0        | 0        | 0        | 0        | 0        | 0        | 0        | 0         | NA       | 0        | NA       | 0        | NA       |
| ATSG56570 | ATSG56570 | 0        | 3.568492 | 0        | 0        | 0        | 0.996841 | 0        | 0        | 0.959536 | 0        | 0        | 0        | -0.31121  | NA       | 0.45596  | NA       | -0.27599 | NA       |
| ATSG56580 | MKK6      | 40.42273 | 48.17464 | 48.93086 | 59.80026 | 72.8714  | 56.81992 | 52.46891 | 52.86561 | 46.85981 | 56.6126  | 50.55269 | 61.11849 | 0.4453061 | 0.090224 | 0.144423 | 0.675342 | 0.289397 | 0.550652 |
| ATSG56590 | ATSG56590 | 156.9353 | 160.5821 | 159.6691 | 115.0639 | 104.6698 | 104.6683 | 135.1741 | 135.9401 | 119.102  | 194.7857 | 192.8984 | 171.9605 | -0.53806  | 0.001433 | -0.28379 | 0.141672 | 0.226454 | 0.438645 |
| ATSG56600 | PFN3      | 205.6804 | 208.7568 | 272.9827 | 237.5514 | 233.8509 |          |          |          |          |          |          |          |           |          |          |          |          |          |

|            |            |          |          |          |          |          |          |          |          |          |          |          |           |          |           |           |          |           |          |
|------------|------------|----------|----------|----------|----------|----------|----------|----------|----------|----------|----------|----------|-----------|----------|-----------|-----------|----------|-----------|----------|
| ATS5G57035 | ATS5G57035 | 267.5034 | 294.4006 | 269.1198 | 366.225  | 341.8331 | 438.6099 | 522.0211 | 504.9205 | 302.6363 | 222.6123 | 283.3611 | 219.6122  | 0.449299 | 0.044707  | 0.659215  | 0.00268  | -0.1913   | 0.652663 |
| ATS5G57040 | ATS5G57040 | 933.2896 | 1165.113 | 1126.698 | 736.9866 | 703.5402 | 614.0539 | 1036.928 | 863.112  | 924.505  | 1457.535 | 1744.068 | 1415.048  | -0.63646 | 1.02E-05  | -0.18605  | 0.282279 | 0.531108  | 0.005042 |
| ATS5G57050 | AB12       | 126.0238 | 160.5821 | 127.4778 | 93.20592 | 102.02   | 119.6209 | 133.995  | 108.9679 | 112.2683 | 161.202  | 166.2917 | 156.4219  | -0.39037 | 0.049353  | -0.20219  | 0.338243 | 0.211226  | 0.498599 |
| ATS5G57060 | ATS5G57060 | 49.93397 | 80.29107 | 70.82099 | 110.5274 | 125.2063 | 105.6651 | 151.1816 | 99.25787 | 158.1519 | 70.0461  | 58.53469 | 100.4829  | 0.742094 | 0.005852  | 0.991823  | 0.000196 | 0.198484  | 0.724045 |
| ATS5G57070 | ATS5G57070 | 84.41218 | 69.5856  | 48.93086 | 57.73818 | 50.34751 | 53.8294  | 53.35821 | 55.02339 | 58.57476 | 46.05771 | 78.4897  | 59.04667  | -0.30749 | 0.302879  | -0.26947  | 0.41344  | -0.155    | 0.791193 |
| ATS5G57080 | ATS5G57080 | 1.188904 | 0        | 1.287654 | 2.474493 | 3.312336 | 2.990522 | 4.446517 | 1.07889  | 8.786214 | 4.797678 | 1.330334 | 1.035907  | 0.640142 | 0.362854  | 1.093811  | 0.108374 | 0.509649  | 0.000000 |
| ATS5G57090 | PIIN2      | 0        | 0        | 1.287654 | 3.299235 | 0.662467 | 0        | 1.778607 | 1.07889  | 0.976246 | 0        | 1.330334 | 1.035907  | 0.45225  | 0.501505  | 0.350597  | 0.626828 | 0.119076  | NA       |
| ATS5G57100 | ATS5G57100 | 112.9459 | 105.2705 | 106.8753 | 91.55626 | 96.72022 | 96.69356 | 126.2811 | 112.2046 | 99.57709 | 101.7108 | 113.0784 | 83.90843  | -0.1919  | 0.399615  | 0.054594  | 0.846461 | -0.12842  | 0.76672  |
| ATS5G57110 | ACAR       | 193.7913 | 151.6609 | 121.0395 | 252.8107 | 243.788  | 366.8374 | 749.6828 | 901.952  | 592.5813 | 207.2597 | 135.6941 | 160.5655  | 0.840512 | 0.000582  | 2.174224  | 9.46E-22 | 0.10585   | 0.856017 |
| ATS5G57120 | ATS5G57120 | 779.921  | 610.2121 | 721.0864 | 683.3726 | 797.6106 | 576.174  | 591.3868 | 546.9972 | 1159.778 | 561.3283 | 537.4549 | 732.3859  | -0.03604 | 0.919717  | 0.115867  | 0.739623 | -0.19653  | 0.706813 |
| ATS5G57123 | ATS5G57123 | 21.40027 | 33.90067 | 21.89012 | 72.17273 | 80.82101 | 50.83888 | 90.70896 | 36.68226 | 95.57709 | 41.26003 | 49.22236 | 49.72351  | 1.291328 | 0.000257  | 1.430266  | 0.000059 | 0.779738  | 0.1573   |
| ATS5G57126 | ATS5G57126 | 1.188904 | 0        | 0        | 0.412416 | 0.662467 | 0        | 2.66791  | 0        | 0        | 0        | 0        | 0         | -0.02758 | NA        | 0.225915  | NA       | -0.22072  | NA       |
| ATS5G57130 | ATS5G57130 | 363.8046 | 178.4246 | 238.2161 | 138.984  | 123.2189 | 149.5261 | 186.7537 | 225.488  | 137.6507 | 207.2597 | 215.5141 | 206.1454  | -0.89552 | 0.000238  | -0.49455  | 0.066027 | -0.30796  | 0.482624 |
| ATS5G57140 | PAP28      | 49.93397 | 58.88012 | 69.53333 | 47.01538 | 36.4357  | 55.82308 | 63.14055 | 43.1556  | 33.19236 | 72.92471 | 59.86503 | 71.47755  | -0.34705 | 0.27582   | -0.32497  | 0.350013 | 0.193594  | 0.74422  |
| ATS5G57150 | BHLH35     | 175.9578 | 174.9744 | 190.5728 | 374.0609 | 470.3518 | 445.5878 | 544.2537 | 374.3748 | 434.4295 | 188.669  | 212.8534 | 210.2689  | 1.220234 | 1.1E-12   | 0.25626   | 5.98E-14 | 0.165825  | 0.652663 |
| ATS5G57160 | LIG4       | 218.7583 | 206.9725 | 189.2852 | 217.343  | 208.0147 | 250.207  | 234.7761 | 229.8036 | 174.748  | 186.1499 | 227.4871 | 212.3608  | 0.126848 | 0.544657  | 0.054535  | 0.82682  | 0.020453  | 0.967164 |
| ATS5G57170 | ATS5G57170 | 128.4014 | 146.3082 | 182.1901 | 168.678  | 135.1433 | 110.6493 | 160.6734 | 112.2046 | 176.7005 | 180.3927 | 247.4421 | 213.7145  | 0.063269 | 0.835596  | 0.164635  | 0.577189 | 0.610193  | 0.054175 |
| ATS5G57180 | CIAT2      | 95.23121 | 818.9689 | 745.519  | 795.9621 | 79.9621  | 79.9621  | 79.9621  | 79.9621  | 79.9621  | 79.9621  | 79.9621  | 79.9621   | -0.01983 | 0.059717  | -0.44465  | 0.002501 | -0.03307  | 0.927445 |
| ATS5G57181 | ATS5G57181 | 0        | 0        | 0        | 0.412416 | 0        | 0        | 0        | 0.976246 | 0        | 0        | 0        | 1.035907  | 0.065653 | NA        | 0.157247  | NA       | 0.168331  | NA       |
| ATS5G57190 | PSD2       | 35.66712 | 23.1952  | 20.60247 | 146.9662 | 15.89921 | 17.94313 | 16.00746 | 18.34113 | 9.76246  | 27.82653 | 22.61568 | 31.0772   | -0.8561  | 0.112045  | -0.77699  | 0.061085 | 0.03097   | 0.976814 |
| ATS5G57200 | ATS5G57200 | 4.755616 | 3.568492 | 3.862963 | 11.96005 | 10.59948 | 10.96525 | 11.56095 | 11.86779 | 7.809968 | 2.878607 | 0        | 0.2071813 | 1.126225 | 0.040765  | 1.011099  | 0.087648 | -0.07087  | NA       |
| ATS5G57210 | ATS5G57210 | 184.2801 | 205.1883 | 190.5728 | 161.6669 | 130.5061 | 167.6469 | 148.5137 | 159.6757 | 123.9832 | 156.4043 | 182.2558 | 157.4578  | -0.32656 | 0.082056  | -0.42139  | 0.033868 | -0.22117  | 0.496655 |
| ATS5G57220 | CYP81F2    | 15.45575 | 24.97944 | 20.60247 | 98.56732 | 125.2063 | 114.6367 | 186.7537 | 202.8313 | 269.4439 | 11.51443 | 7.982004 | 15.5386   | 2.329415 | 1.02E-16  | 3.267565  | 1.15E-32 | -0.63537  | 0.280057 |
| ATS5G57230 | ATS5G57230 | 20.21667 | 16.05821 | 29.61605 | 46.60296 | 49.68505 | 44.85784 | 45.35448 | 30.20892 | 47.83605 | 14.39303 | 19.95501 | 35.22082  | 0.986605 | 0.005329  | 0.804967  | 0.035136 | 0.045809  | 0.96454  |
| ATS5G57240 | ORP4C      | 14.26685 | 24.97944 | 16.76351 | 23.9201  | 31.13596 | 27.91154 | 11.56095 | 21.5778  | 11.71495 | 20.15025 | 30.59768 | 13.46678  | 0.53545  | 0.212444  | -0.26478  | 0.620535 | 0.108913  | 0.84833  |
| ATS5G57250 | ATS5G57250 | 177.1467 | 114.1917 | 140.3543 | 85.37002 | 72.20893 | 100.6809 | 129.8383 | 137.019  | 85.90965 | 153.2945 | 115.7391 | 153.3142  | -0.73132 | 0.002385  | -0.29113  | 0.302141 | -0.09701  | 0.862386 |
| ATS5G57260 | CYP71B10   | 0        | 0        | 0        | 0        | 0        | 2.66791  | 0        | 0        | 0.959536 | 0        | 0        | 1.035907  | 0        | NA        | 0.418461  | NA       | 0.314158  | NA       |
| ATS5G57270 | ATS5G57270 | 274.6368 | 264.0684 | 269.1198 | 240.0259 | 245.1129 | 277.1217 | 274.7948 | 263.2491 | 198.1779 | 287.8607 | 211.5231 | 271.4075  | -0.08762 | 0.691453  | -0.1317   | 0.557624 | -0.06141  | 0.883748 |
| ATS5G57280 | ATS5G57280 | 92.73451 | 103.4863 | 112.0259 | 141.871  | 142.4305 | 131.583  | 98.71269 | 93.86342 | 188.415  | 109.3871 | 114.4087 | 114.9856  | 0.416709 | 0.125384  | 0.293481  | 0.334789 | 0.130114  | 0.821684 |
| ATS5G57290 | RPP3B      | 729.987  | 681.582  | 630.9569 | 591.4427 | 812.8473 | 676.8549 | 465.995  | 531.8927 | 1231.837 | 722.5303 | 689.113  | 749.9963  | 0.242428 | 0.490333  | 0.172229  | 0.65596  | 0.076766  | 0.917771 |
| ATS5G57300 | COQ5       | 150.9908 | 144.5239 | 168.6827 | 170.3276 | 175.5538 | 140.5545 | 117.3881 | 137.019  | 196.2254 | 173.6759 | 125.0514 | 179.2118  | 0.068309 | 0.816634  | -0.04505  | 0.889789 | 0.044436  | 0.940181 |
| ATS5G57310 | ATS5G57310 | 0        | 0        | 0        | 0.662467 | 0        | 0.889303 | 1.07889  | 0        | 0        | 0        | 0        | 0         | 0.109123 | NA        | 0.333186  | NA       | 0         | NA       |
| ATS5G57320 | VLN5       | 16.64466 | 16.05821 | 15.45185 | 21.44561 | 13.24935 | 26.9147  | 24.9005  | 29.13003 | 11.71495 | 28.78607 | 15.96401 | 21.75404  | 0.286672 | 0.565864  | 0.381496  | 0.460551 | 0.415     | 0.60198  |
| ATS5G57330 | ATS5G57330 | 556.407  | 544.195  | 643.8272 | 776.1661 | 833.3838 | 683.8328 | 662.5311 | 573.9694 | 720.4659 | 596.8312 | 558.7403 | 595.6463  | 0.39016  | 0.005977  | 0.162732  | 0.332485 | 0.00468   | 0.900719 |
| ATS5G57340 | ATS5G57340 | 248.4809 | 264.0684 | 320.6259 | 281.6798 | 229.8761 | 221.2987 | 251.6729 | 204.9891 | 182.558  | 226.5404 | 303.3161 | 290.0538  | -0.17498 | 0.437802  | -0.3715   | 0.084016 | -0.02692  | 0.959933 |
| ATS5G57345 | ATS5G57345 | 853.6337 | 970.6298 | 990.2062 | 703.9934 | 684.9912 | 490.4457 | 461.5485 | 387.3215 | 552.5552 | 1191.743 | 1044.312 | 1300.063  | -0.56524 | 0.00186   | -0.98178  | 2.36E-08 | 0.323828  | 0.258363 |
| ATS5G57350 | AH43       | 2834.347 | 2576.451 | 2666.732 | 698.2405 | 128.424  | 1057.382 | 1095.073 | 677.5114 | 2415.151 | 2414.556 | 2354.616 | 0         | -1.53009 | 4.74E-16  | -1.4722   | 7.48E-15 | -0.16471  | 0.678395 |
| ATS5G57360 | ADO1       | 419.6831 | 481.7464 | 373.4198 | 333.2318 | 253.0625 | 315.9985 | 284.5771 | 376.5326 | 271.3964 | 326.2421 | 297.9948 | 279.6948  | -0.48307 | 0.008514  | -0.43967  | 0.02253  | -0.48058  | 0.056901 |
| ATS5G57370 | ATS5G57370 | 111.757  | 110.6233 | 128.7654 | 180.638  | 179.5286 | 174.4471 | 114.7201 | 110.0468 | 166.9381 | 107.468  | 127.7121 | 92.19568  | 0.588672 | 0.005074  | 0.15041   | 0.580008 | -0.10828  | 0.825918 |
| ATS5G57380 | VIN3       | 1.188904 | 0        | 0        | 0        | 0.662467 | 0        | 0.889303 | 0        | 1.952492 | 0        | 2.660668 | 1.035907  | -0.18206 | NA        | 0.245175  | NA       | 0.32865   | NA       |
| ATS5G57390 | AIL5       | 39.23383 | 12.48972 | 18.02716 | 17.73387 | 19.12441 | 14.95261 | 16.89677 | 14.02557 | 3.904984 | 22.06932 | 30.59768 | 33.14901  | -0.57125 | 0.242558  | -0.862    | 0.084726 | 0.228814  | 0.811605 |
| ATS5G57391 | ATS5G57391 | 0        | 0        | 0        | 0        | 0        | 0        | 0        | 0        | 0        | 0        | 0        | 0         | #N/A     | #N/A      | #N/A      | #N/A     | #N/A      | #N/A     |
| ATS5G57400 | ATS5G57400 | 0        | 0        | 0        | 0.412416 | 0        | 0        | 1.778607 | 0        | 0        | 0        | 0        | 0         | 0.060593 | NA        | 0.260815  | NA       | 0         | NA       |
| ATS5G57410 | ATS5G57410 | 107.0014 | 101.702  | 117.1765 | 173.2145 | 161.642  | 167.4693 | 155.6281 | 187.7268 | 178.653  | 173.6759 | 156.9794 | 160.5655  | 0.607011 | 0.000429  | 0.656203  | 0.000212 | 0.575803  | 0.01192  |
| ATS5G57420 | IAA33      | 0        | 0        | 0        | 0        | 0        | 0        | 0        | 0        | 0        | 0        | 0        | 0         | 0        | NA        | 0         | NA       | 0         | NA       |
| ATS5G57430 | GP22       | 191.4135 | 199.8356 | 209.8877 | 191.3608 | 210.6646 | 171.4566 | 152.9602 | 149.9657 | 204.0354 | 223.5718 | 137.0244 | 253.7971  | -0.06252 | 0.831877  | -0.2369   | 0.383202 | 0.038352  | 0.949285 |
| ATS5G57450 | XRCC3      | 7.133424 | 8.92123  | 6.438272 | 11.13522 | 7.28714  | 7.974726 | 12.45025 | 14.02557 | 10.77891 | 7.676285 | 7.982004 | 7.251346  | 0.222413 | 0.171815  | 0.608951  | 0.284369 | 0.027254  | NA       |
| ATS5G57460 | ATS5G57460 | 449.4057 | 422.8663 | 436.5148 | 274.6688 | 307.3848 | 304.0364 | 293.4701 | 338.7714 | 317.7989 | 360.7854 | 329.9228 | 366.7109  | -0.56313 | 0.779E-06 | -0.469146 | 0.000499 | -0.30336  | 0.114367 |
| ATS5G57480 | ATS5G57480 | 11.88904 | 19.62671 | 11.58889 | 40.00433 | 42.39791 | 51.83572 | 65.80846 | 58.26006 | 75.17094 | 4.797678 | 9.312338 | 3.10772   | 1.524068 | 9.06E-06  | 2.083233  | 5.47E-10 | -0.103713 | 0.101358 |
| ATS5G57490 | VDA4C      | 495.7729 | 549.5478 | 573.0062 | 463.5551 | 502.8127 | 491.4425 | 545.143  | 520.025  | 445.1672 | 54.75663 | 638.5603 | 424.7121  | -0.14804 | 0.444763  | -0.09665  | 0.655924 | -0.04839  | 0.90444  |
| ATS5G57500 | ATS5G57500 | 9.511232 | 3.568492 | 14.1642  | 16.05821 | 13.24935 | 21.93025 | 23.12189 | 18.34113 | 21.47881 | 10.33903 | 15.96401 | 13.46678  | 0.681223 | 0.142586  | 0.974376  | 0.035824 | -0.049712 |          |





|           |           |          |           |          |          |          |          |          |          |          |          |          |          |          |          |          |           |           |          |    |
|-----------|-----------|----------|-----------|----------|----------|----------|----------|----------|----------|----------|----------|----------|----------|----------|----------|----------|-----------|-----------|----------|----|
| ATSG58890 | AGL82     | 0        | 0         | 0        | 0        | 0.662467 | 0        | 0        | 0        | 0        | 0        | 0        | 0        | 0        | 0.128567 | NA       | 0         | NA        | 0        | NA |
| ATSG58900 | ATSG58900 | 149.8019 | 164.1506  | 175.121  | 138.5716 | 124.5438 | 148.5293 | 204.5398 | 183.4113 | 155.2231 | 174.6355 | 210.1928 | 190.6068 | -0.24658 | 0.211628 | 0.151377 | 0.497215  | 0.226757  | 0.480099 |    |
| ATSG58910 | LAC16     | 1.188904 | 0         | 0        | 0        | 1.987402 | 0        | 0.889303 | 0        | 0.972646 | 0        | 0        | 0        | 0.121024 | NA       | 0.095005 | NA        | -0.21438  | NA       |    |
| ATSG58920 | ATSG58920 | 124.8349 | 157.0137  | 109.4506 | 170.3276 | 187.4782 | 159.4945 | 135.1741 | 146.729  | 274.3251 | 111.3061 | 101.1054 | 119.1293 | 0.393538 | 0.164338 | 0.491719 | 0.087162  | -0.21753  | 0.681704 |    |
| ATSG58930 | ATSG58930 | 529.0623 | 444.2773  | 486.7333 | 360.0388 | 372.3066 | 352.8816 | 265.0124 | 295.6158 | 330.9474 | 376.138  | 300.6555 | 390.5368 | -0.42451 | 0.0049   | -0.70526 | 2.08E-06  | -0.4441   | 0.026396 |    |
| ATSG58940 | CRCK1     | 53.50068 | 66.34929  | 68.24568 | 185.1746 | 195.4278 | 171.4566 | 136.9527 | 135.9401 | 157.1476 | 32.62421 | 43.90102 | 58.01077 | 1.324943 | 2.35E-09 | 0.907722 | 3.45E-05  | -0.6362   | 0.087743 |    |
| ATSG58950 | ATSG58950 | 1551.52  | 1673.623  | 1524.583 | 896.5915 | 943.3534 | 1074.594 | 1270.815 | 1458.659 | 1204.688 | 1286.737 | 1378.226 | 1333.212 | -0.69976 | 1.63E-09 | -0.26867 | 0.03984   | -0.24554  | 0.188083 |    |
| ATSG58960 | GIL1      | 330.5153 | 283.6951  | 300.0235 | 194.6602 | 157.6672 | 156.504  | 133.3955 | 159.6757 | 188.4155 | 296.4965 | 264.7365 | 262.0844 | -0.82199 | 1.01E-06 | -0.91101 | 1.02E-04  | -0.14972  | 0.657308 |    |
| ATSG58970 | PUMP2     | 167.6355 | 139.1712  | 178.984  | 169.9004 | 176.8788 | 154.5103 | 184.0858 | 140.2557 | 132.7695 | 198.6239 | 172.9434 | 158.4937 | 0.037441 | 0.884062 | -0.0903  | 0.728552  | 0.116439  | 0.778224 |    |
| ATSG58980 | ATSG58980 | 141.4796 | 146.3082  | 178.984  | 122.4874 | 113.9444 | 139.5577 | 139.6206 | 135.9401 | 86.88589 | 152.5662 | 148.9974 | 172.9964 | -0.31078 | 0.174728 | -0.35538 | 0.139188  | 0.023129  | 0.969668 |    |
| ATSG58990 | ATSG58990 | 117.7015 | 115.976   | 123.6148 | 183.5249 | 221.2641 | 183.4187 | 138.7313 | 102.4945 | 199.1542 | 135.2945 | 131.7031 | 167.8169 | 0.69227  | 0.003157 | 0.29041  | 0.29729   | 0.27227   | 0.531315 |    |
| ATSG59000 | ATSG59000 | 184.2801 | 196.2671  | 202.1617 | 133.6226 | 177.5412 | 124.6051 | 178.75   | 146.729  | 317.2799 | 213.9764 | 227.4871 | 198.8941 | -0.39826 | 0.153176 | 0.136939 | 0.684512  | 0.129738  | 0.820724 |    |
| ATSG59010 | ATSG59010 | 205.6804 | 183.7773  | 209.8877 | 124.5495 | 143.7554 | 119.6209 | 136.0634 | 143.4924 | 134.7219 | 148.728  | 159.6401 | 165.745  | -0.61942 | 0.000112 | -0.52951 | 0.001929  | -0.33885  | 0.184156 |    |
| ATSG59020 | ATSG59020 | 42.80054 | 55.31163  | 34.76667 | 21.85803 | 20.53649 | 16.94629 | 16.89677 | 37.76115 | 31.23987 | 35.50282 | 31.92802 | 41.43626 | -1.03564 | 0.001876 | -0.57768 | 0.121249  | -0.24309  | 0.717734 |    |
| ATSG59030 | COP1T     | 317.4374 | 401.4554  | 327.0642 | 377.3603 | 368.9943 | 351.8848 | 297.0274 | 283.7481 | 410.9996 | 290.7393 | 287.3521 | 299.377  | 0.076972 | 0.722107 | -0.06868 | 0.770729  | -0.24184  | 0.417269 |    |
| ATSG59040 | COP3T     | 0        | 0         | 0        | 0        | 0.662467 | 0.996841 | 0        | 0        | 0        | 0        | 0        | 0        | 0.262313 | NA       | 0        | NA        | 0         | NA       |    |
| ATSG59050 | ATSG59050 | 173.58   | 192.6986  | 193.1482 | 105.166  | 124.5438 | 92.70619 | 98.71269 | 74.44341 | 82.00466 | 167.9187 | 143.6761 | 181.2836 | -0.76618 | 3.54E-05 | -1.09389 | 1.06E-08  | -0.17036  | 0.64162  |    |
| ATSG59055 | ATSG59055 | 0        | 0         | 0        | 0        | 0.237247 | 0        | 1.993682 | 0.889303 | 0        | 0.99536  | 0        | 0        | -0.09217 | NA       | #N/A     | #N/A      | #N/A      | #N/A     |    |
| ATSG59060 | ATSG59060 | 2.377808 | 1.784246  | 0        | 1.237247 | 0        | 1.993682 | 0.889303 | 0        | 0.99536  | 0        | 0        | 0        | -0.09217 | NA       | #N/A     | #N/A      | -0.447239 | NA       |    |
| ATSG59070 | ATSG59070 | 64.20081 | 73.15409  | 72.10864 | 55.26369 | 69.55906 | 55.82308 | 24.9005  | 17.26224 | 20.50117 | 34.54328 | 43.90102 | 43.50807 | -0.19508 | 0.508661 | -1.61789 | 5.81E-09  | -0.74654  | 0.039511 |    |
| ATSG59080 | ATSG59080 | 369.7491 | 454.9827  | 397.8852 | 506.4463 | 588.2709 | 343.9101 | 329.9316 | 193.1213 | 184.5105 | 361.7449 | 439.0102 | 365.675  | 0.230913 | 0.412499 | -0.75143 | 0.002835  | -0.06442  | 0.915766 |    |
| ATSG59090 | ATSBT4.12 | 0        | 0.3568492 | 0        | 3.299325 | 0        | 0        | 7.974726 | 4.446517 | 2.15778  | 1.952492 | 0        | 1.330334 | -0.78561 | 0.288144 | 0.52986  | 0.471994  | -0.27655  | NA       |    |
| ATSG59100 | ATSG59100 | 1.188904 | 0         | 0        | 0        | 0        | 0        | 0        | 0        | 0        | 0        | 0        | 0        | -0.2184  | NA       | -0.20558 | NA        | -0.19918  | NA       |    |
| ATSG59105 | ATSG59105 | 0        | 0         | 0        | 0        | 0        | 0        | 0        | 0        | 0        | 0        | 1.330334 | 1.035907 | 0        | NA       | 0        | NA        | 0         | 0.375122 |    |
| ATSG59110 | ATSG59110 | 0        | 0         | 0        | 0        | 0        | 0        | 0        | 0        | 0        | 0        | 0        | 0        | #N/A     | #N/A     | #N/A     | #N/A      | #N/A      | #N/A     |    |
| ATSG59120 | ATSBT4.13 | 0        | 0         | 0        | 0        | 0        | 0        | 0        | 0        | 0.959536 | 0        | 0        | 0        | 0        | NA       | 0        | NA        | 0         | 0.171512 |    |
| ATSG59130 | ATSG59130 | 310.3039 | 308.6746  | 281.9963 | 79.59621 | 74.19633 | 51.83572 | 136.0634 | 115.4412 | 92.74337 | 365.5831 | 367.1722 | 328.3824 | -2.0463  | 1.01E-30 | -1.35127 | 4.89E-14  | 0.232783  | 0.460368 |    |
| ATSG59140 | ATSG59140 | 233.0252 | 251.5787  | 256.2432 | 485.4131 | 577.009  | 411.6952 | 398.408  | 321.5092 | 517.4104 | 248.5197 | 228.8174 | 252.7612 | 0.970634 | 2.85E-07 | 0.722336 | 0.000265  | -0.01849  | 0.97512  |    |
| ATSG59150 | ATSG59150 | 190.2246 | 249.7944  | 248.5173 | 225.1789 | 255.7124 | 238.2449 | 169.857  | 196.358  | 326.2515 | 327.2076 | 184.9164 | 220.6481 | 0.065852 | 0.781066 | -0.18385 | 0.415896  | -0.09746  | 0.811658 |    |
| ATSG59160 | ATSG59160 | 558.7849 | 595.9382  | 610.3482 | 669.3505 | 726.0641 | 709.7506 | 678.5386 | 662.4384 | 742.9232 | 690.8657 | 687.7827 | 604.9694 | 0.251425 | 0.040219 | 0.238548 | 0.065587  | 0.167085  | 0.416253 |    |
| ATSG59170 | ATSG59170 | 0        | 0         | 1.287654 | 0        | 0.662467 | 1.993682 | 0        | 0        | 4.88123  | 0.99536  | 1.330334 | 1.035907 | 0.112552 | 0.877494 | 0.437651 | 0.512829  | 0.246528  | NA       |    |
| ATSG59180 | ATSG59180 | 92.73451 | 96.34929  | 101.7247 | 109.2901 | 124.5438 | 117.6272 | 84.48383 | 77.68008 | 86.60085 | 110.3466 | 73.16837 | 109.8061 | 0.262931 | 0.261845 | 0.262931 | 0.0758927 | 0.025751  | 0.96566  |    |
| ATSG59190 | ATSG59190 | 2.377808 | 0         | 1.287654 | 3.299325 | 3.974804 | 1.993682 | 7.114428 | 5.39445  | 4.88123  | 1.919071 | 1.330334 | 5.179533 | 0.554796 | 0.434966 | 1.156481 | 0.082177  | 0.468234  | NA       |    |
| ATSG59200 | ATSG59200 | 9.511232 | 12.48972  | 5.150617 | 0.860727 | 11.26194 | 11.96209 | 11.56095 | 9.710009 | 9.76246  | 4.797678 | 6.65167  | 9.321599 | 0.202937 | 0.740319 | 0.192221 | 0.740778  | -0.22778  | NA       |    |
| ATSG59210 | ATSG59210 | 297.226  | 310.4588  | 292.2975 | 343.9546 | 345.8079 | 344.9069 | 353.9428 | 329.0614 | 284.0876 | 303.2133 | 305.9768 | 293.1615 | 0.20101  | 0.171272 | 0.105608 | 0.540923  | 0.005316  | 0.990203 |    |
| ATSG59220 | ATSG59220 | 16.64466 | 17.84246  | 30.9037  | 57.73818 | 54.32232 | 63.79781 | 46.61199 | 52.86561 | 57.59851 | 26.867   | 17.29434 | 25.89766 | 1.3131   | 0.000013 | 1.177898 | 0.00019   | 0.08981   | 0.91625  |    |
| ATSG59230 | ATSG59230 | 0        | 0         | 0        | 1.237247 | 0        | 1.324935 | 0        | 2.67911  | 0.952492 | 1.919071 | 0        | 0        | 0.409072 | NA       | 0.659699 | NA        | 0.89122   | NA       |    |
| ATSG59240 | ATSG59240 | 15.45575 | 17.136984 | 6.438272 | 4.948987 | 3.312336 | 5.981405 | 2.66791  | 6.47334  | 5.87476  | 18.23118 | 17.29434 | 10.35907 | -0.8427  | 0.127717 | -0.76034 | 0.20834   | 0.531908  | NA       |    |
| ATSG59250 | ATSG59250 | 554.0292 | 667.308   | 645.1188 | 289.9281 | 276.2489 | 348.8943 | 468.6269 | 513.5516 | 547.674  | 631.3744 | 461.6259 | 668.1597 | -1.01109 | 6.86E-10 | -0.27961 | 0.147021  | -0.07689  | 0.845819 |    |
| ATSG59260 | ATSG59260 | 1.188904 | 1.784246  | 6.438272 | 5.361402 | 5.299738 | 7.974726 | 4.446517 | 2.15778  | 4.88123  | 0.99536  | 1.330334 | 4.143626 | 0.640433 | 0.341315 | 0.161993 | 0.849008  | -0.30685  | NA       |    |
| ATSG59270 | ATSG59270 | 0        | 0         | 0        | 0.824831 | 0.662467 | 0        | 0        | 0        | 0        | 0        | 0        | 0        | 0.256538 | NA       | 0        | NA        | 0         | NA       |    |
| ATSG59280 | ATSG59280 | 0        | 0         | 0        | 0        | 0        | 0        | 0        | 0        | 0        | 0        | 0        | 0        | #N/A     | #N/A     | #N/A     | #N/A      | #N/A      | #N/A     |    |
| ATSG59290 | ATSG59290 | 500.5286 | 421.0821  | 495.7469 | 328.6952 | 342.4956 | 346.9006 | 330.8209 | 298.8525 | 392.4509 | 545.9758 | 462.9562 | 453.7271 | -0.47607 | 0.001547 | -0.46757 | 0.002691  | 0.042476  | 0.908707 |    |
| ATSG59300 | ATSG59300 | 248.4809 | 251.5787  | 265.2568 | 285.3916 | 335.2084 | 216.3144 | 270.3483 | 190.9635 | 376.831  | 316.6468 | 282.0308 | 366.7109 | 0.127452 | 0.668122 | 0.127452 | 0.668586  | 0.232308  | 0.435262 |    |
| ATSG59310 | ATSG59310 | 5.94452  | 8.92123   | 7.725926 | 2.886909 | 2.649869 | 0.996841 | 0.889303 | 2.15778  | 0        | 0.99536  | 11.97301 | 8.287252 | -1.16612 | 0.049712 | -1.63811 | 0.007355  | 0.362574  | NA       |    |
| ATSG59320 | ATSG59320 | 11.88904 | 10.70548  | 9.01358  | 10.31039 | 10.59948 | 16.94629 | 18.67537 | 15.10446 | 18.54867 | 35.50282 | 25.27635 | 54.90305 | 0.139572 | 0.805884 | 0.600941 | 0.200315  | 1.648814  | 0.000866 |    |
| ATSG59330 | ATSG59330 | 26.15589 | 35.68492  | 43.78025 | 37.52982 | 26.49869 | 64.79465 | 32.90423 | 29.13003 | 30.26663 | 50.85539 | 35.91902 | 55.93895 | 0.238176 | 0.568311 | -0.17176 | 0.720267  | 0.410678  | 0.519205 |    |
| ATSG59340 | ATSG59340 | 3.566712 | 5.352738  | 2.575309 | 2.474493 | 1.987402 | 0        | 0.889303 | 2.15778  | 2.928738 | 4.797678 | 6.65167  | 4.143626 | -0.67156 | 0.331464 | -0.51693 | 0.495852  | 0.32892   | NA       |    |
| ATSG59350 | ATSG59350 | 292.4704 | 287.2636  | 329.6395 | 191.3608 | 229.2137 | 186.4092 | 198.3147 | 174.7802 | 283.1113 | 336.797  | 372.4935 | 392.6086 | -0.56941 | 0.003154 | -0.45923 | 0.025332  | 0.268821  | 0.408826 |    |
| ATSG59360 | ATSG59360 | 17.83356 | 17.136984 | 15.45185 | 8.248311 | 3.974804 | 6.977885 | 3.535821 | 7.55223  | 3.904984 | 16.31211 | 26.60668 | 22.78994 | -0.90461 | 0.068077 | -1.04749 | 0.048037  | 0.572912  | NA       |    |
| ATSG59370 | ATSG59370 | 2.377808 | 3.568492  | 1.287654 | 0        | 1.324935 | 1.993682 | 0.889303 | 0        | 0.99536  | 1.330334 | 0        | 0        | -0.48842 | 0.484207 | -0.84261 | 0.197154  | -0.60091  | NA       |    |
| ATSG59380 | ATSG59380 | 46.36725 | 60.66437  | 55.36914 | 64.74925 | 67.57166 | 54.82624 | 46.24378 | 37.76115 | 61.5035  | 32.62421 | 23.94601 | 37.29264 | 0.219515 | 0.885666 | -0.13451 | 0.718557  | -0.71432  | 0.088924 |    |
| ATSG59390 | ATSG59390 | 0        | 1.784246  | 0        | 0.412416 | 0.662467 | 0        | 0        | 0        | 0.976246 | 0        | 0        | 0        | -0.04576 | NA       | -0.08556 | NA        | -0.27582  | NA       |    |
| ATSG59400 | ATSG59400 |          |           |          |          |          |          |          |          |          |          |          |          |          |          |          |           |           |          |    |

|           |           |          |           |           |          |          |          |          |          |          |          |          |           |          |          |          |          |          |          |
|-----------|-----------|----------|-----------|-----------|----------|----------|----------|----------|----------|----------|----------|----------|-----------|----------|----------|----------|----------|----------|----------|
| ATSG59840 | ATSG59840 | 256.8033 | 219.4623  | 213.7506  | 319.2097 | 370.9817 | 325.9669 | 291.6915 | 236.2769 | 351.4486 | 282.1035 | 300.6555 | 270.3716  | 0.543309 | 0.001904 | 0.340525 | 0.079738 | 0.294296 | 0.309993 |
| ATSG59845 | GAS110    | 3.566712 | 7.136984  | 9.01358   | 6.186234 | 3.974804 | 1.993682 | 0.889303 | 1.07889  | 0.976246 | 9.595356 | 13.30334 | 4.143626  | -0.40382 | 0.559749 | -1.42742 | 0.024613 | 0.360736 | NA       |
| ATSG59850 | RPS15AA   | 996.3015 | 997.3935  | 1133.136  | 1200.542 | 1332.222 | 1018.771 | 743.572  | 743.3552 | 1159.78  | 1058.386 | 1048.303 | 1026.583  | 0.180305 | 0.397328 | -0.25358 | 0.275357 | 0.002535 | 0.996198 |
| ATSG59860 | ATSG59860 | 0        | 1.784246  | 1.287654  | 0        | 2.649869 | 0.996841 | 0        | 2.15778  | 0        | 0.959536 | 3.991002 | 0         | 0.074734 | 0.922873 | -0.11934 | 0.878423 | 0.202524 | NA       |
| ATSG59870 | HTA6      | 372.1269 | 349.7122  | 346.379   | 471.8034 | 573.6967 | 315.9985 | 301.4739 | 210.3835 | 495.933  | 372.2998 | 437.6799 | 477.5529  | 0.334135 | 0.275591 | -0.07932 | 0.837613 | 0.254684 | 0.626348 |
| ATSG59880 | ADF3      | 1675.166 | 1971.5192 | 1887.701  | 2565.225 | 2881.07  | 2089.378 | 2071.188 | 1743.486 | 2806.707 | 1857.661 | 1944.948 | 2100.818  | 0.436224 | 0.022339 | 0.253416 | 0.235767 | 0.091443 | 0.827392 |
| ATSG59890 | ADF4      | 481.0214 | 843.9484  | 964.4531  | 1114.759 | 1265.975 | 862.6753 | 1118.744 | 827.5086 | 1428.248 | 1114.021 | 1379.556 | 1281.416  | 0.299598 | 0.185924 | 0.354476 | 0.124803 | 0.510725 | 0.080487 |
| ATSG59900 | ATSG59900 | 49.93397 | 66.0171   | 47.64321  | 62.62826 | 26.49869 | 27.91154 | 35.57214 | 47.47116 | 33.19236 | 48.93632 | 27.93701 | 50.75942  | -0.1937  | 0.00064  | -0.45281 | 0.185053 | -0.30135 | 0.594117 |
| ATSG59910 | HTB4      | 1676.355 | 1639.722  | 1901.865  | 2195.288 | 2345.134 | 2017.606 | 1705.684 | 1535.26  | 2563.622 | 2212.689 | 2320.102 | 2099.783  | 0.32247  | 0.096012 | 0.150067 | 0.506143 | 0.337947 | 0.23487  |
| ATSG59920 | ULI3      | 268.6923 | 276.5581  | 231.7778  | 168.678  | 149.7176 | 173.4503 | 170.7463 | 175.8591 | 171.8193 | 254.2769 | 320.6105 | 225.8276  | -0.64569 | 0.000131 | -0.56953 | 0.001329 | 0.039323 | 0.928043 |
| ATSG59930 | ATSG59930 | 1.188904 | 1.784246  | 0         | 0        | 0        | 1.324935 | 0        | 0        | 0        | 0        | 0        | 0         | -0.18983 | NA       | -0.44722 | NA       | -0.43763 | NA       |
| ATSG59940 | ATSG59940 | 2.377808 | 0         | 3.862963  | 0.824831 | 2.649869 | 0        | 0        | 0        | 0        | 0.959536 | 1.330334 | 1.035907  | -0.32515 | 0.657164 | -0.98121 | 0.119462 | -0.38561 | NA       |
| ATSG59945 | ATSG59945 | 0        | 0         | 0         | 0        | 0        | 0        | 0        | 0        | 0        | 0        | 0        | 0         | #N/A     | #N/A     | #N/A     | #N/A     | #N/A     | #N/A     |
| ATSG59950 | ALY1      | 606.341  | 638.7601  | 646.4025  | 711.0045 | 763.1623 | 691.8075 | 701.6604 | 705.594  | 930.3624 | 701.4205 | 811.5037 | 536.5996  | 0.192256 | 0.329151 | 0.299766 | 0.12253  | 0.111728 | 0.761719 |
| ATSG59960 | ATSG59960 | 284.148  | 248.0102  | 325.7765  | 276.3184 | 330.5712 | 288.087  | 346.8284 | 326.9037 | 359.2585 | 284.9821 | 290.0128 | 294.1975  | 0.051632 | 0.789209 | 0.257626 | 0.123124 | 0.011214 | 0.9802   |
| ATSG59970 | ATSG59970 | 186.6579 | 228.3835  | 230.4901  | 364.9878 | 300.0977 | 302.0428 | 179.6393 | 226.5669 | 344.6148 | 281.1439 | 270.0578 | 302.4847  | 0.569363 | 0.012239 | 0.211841 | 0.44157  | 0.392683 | 0.274581 |
| ATSG59980 | ATSG59980 | 58.25629 | 67.80135  | 56.65679  | 70.11065 | 68.23413 | 68.78201 | 72.03358 | 77.68008 | 56.62227 | 52.77446 | 55.87403 | 61.11849  | 0.186771 | 0.49718  | 0.17761  | 0.554483 | -0.09199 | 0.874304 |
| ATSG59990 | ATSG59990 | 24.96698 | 26.76369  | 20.60247  | 38.76706 | 37.76063 | 28.90838 | 38.24005 | 23.73558 | 31.23987 | 39.34096 | 21.28534 | 31.0772   | 0.524129 | 0.149215 | 0.374995 | 0.40718  | 0.337658 | 0.609275 |
| ATSG60000 | ATSG60000 | 0        | 0         | 0         | 0        | 0        | 0        | 1.778607 | 0        | 0        | 0        | 0        | 0         | 0        | NA       | 0.248756 | NA       | 0        | NA       |
| ATSG60010 | RBOHH     | 1.188904 | 1.784246  | 0         | 0        | 0        | 0        | 1.07889  | 0        | 0        | 0        | 0        | 0         | -0.51824 | NA       | -0.26789 | NA       | -0.47293 | NA       |
| ATSG60020 | LAC17     | 60.6341  | 76.72258  | 52.79383  | 25.98218 | 29.14856 | 21.9305  | 27.56841 | 17.26224 | 14.64369 | 56.6126  | 77.15937 | 55.93895  | -1.19895 | 2.98E-05 | -1.52864 | 6.2E-07  | 0.003768 | 0.996222 |
| ATSG60022 | ATSG60022 | 8.322328 | 0         | 9.01358   | 9.412156 | 3.974804 | 2.990522 | 6.251214 | 2.15778  | 0.976246 | 0        | 5.321336 | 6.215439  | -0.41033 | 0.578267 | -0.53686 | 0.47817  | -0.40322 | NA       |
| ATSG60030 | ATSG60030 | 230.6474 | 174.8561  | 168.6827  | 164.1414 | 161.642  | 114.6367 | 151.1816 | 141.3346 | 307.5175 | 150.6471 | 166.2917 | 168.8528  | -0.35898 | 0.245043 | 0.058043 | 0.884008 | -0.23181 | 0.675201 |
| ATSG60040 | NRPC1     | 124.8349 | 90.99655  | 77.25926  | 72.17273 | 62.27192 | 78.75042 | 66.69776 | 67.97007 | 44.90732 | 79.64146 | 103.766  | 102.5447  | -0.45179 | 0.086539 | -0.68227 | 0.010964 | -0.04522 | 0.94643  |
| ATSG60050 | ATSG60050 | 95.11232 | 71.36984  | 90.1358   | 49.90228 | 66.90919 | 58.81361 | 67.58706 | 58.26006 | 78.09968 | 71.00564 | 79.82004 | 63.15903  | -0.55085 | 0.022557 | -0.3287  | 0.232199 | -0.27056 | 0.538161 |
| ATSG60060 | ATSG60060 | 0        | 0         | 0         | 0.412416 | 0        | 1.993682 | 0        | 0        | 0        | 1.330334 | 0        | 0         | 0.380987 | NA       | 0        | NA       | 0.194409 | NA       |
| ATSG60070 | ATSG60070 | 0        | 0         | 0         | 0        | 0        | 0        | 0        | 0        | 0        | 0        | 0        | 0         | #N/A     | #N/A     | #N/A     | #N/A     | #N/A     | #N/A     |
| ATSG60080 | ATSG60080 | 0        | 3.568492  | 0         | 0        | 0        | 0        | 1.778607 | 0        | 0        | 0        | 0        | 0         | -0.45344 | NA       | -0.14207 | NA       | -0.41978 | NA       |
| ATSG60090 | ATSG60090 | 0        | 0         | 1.287654  | 0.412416 | 0        | 0        | 0        | 1.07889  | 0        | 2.878607 | 0        | 0         | -0.16704 | NA       | -0.05005 | NA       | 0.232976 | NA       |
| ATSG60100 | APRR3     | 46.36725 | 58.88012  | 41.20494  | 280.855  | 269.6242 | 347.8974 | 942.6617 | 953.7387 | 721.4458 | 97.87263 | 126.3817 | 89.08796  | 2.516529 | 2.12E-32 | 4.032799 | 8.07E-84 | 1.034915 | 0.00023  |
| ATSG60110 | APUM18    | 3.566712 | 0         | 0         | 0.412416 | 0.662467 | 1.993682 | 0        | 1.07889  | 0.976246 | 0        | 1.330334 | 1.035907  | -0.13704 | 0.85544  | -0.26707 | 0.716901 | -0.22116 | NA       |
| ATSG60120 | TOE2      | 146.2352 | 155.2294  | 168.6827  | 194.6620 | 179.5286 | 204.3524 | 221.4366 | 229.8036 | 148.3894 | 196.7048 | 176.9344 | 154.3501  | 0.28953  | 0.18298  | 0.341022 | 0.12914  | 0.163549 | 0.685893 |
| ATSG60130 | ATSG60130 | 8.322328 | 1.784246  | 3.862963  | 0.412416 | 1.987402 | 0.996841 | 0        | 2.15778  | 0.904984 | 4.797678 | 2.660668 | 3.10772   | -1.13482 | 0.083606 | -0.71887 | 0.325268 | -0.2601  | NA       |
| ATSG60140 | ATSG60140 | 2.377808 | 1.784246  | 0         | 0.824831 | 0        | 0        | 0        | 0        | 0.976246 | 0        | 0        | 0.1035907 | -0.46615 | NA       | -0.44689 | NA       | -0.42557 | NA       |
| ATSG60142 | ATSG60142 | 33.28931 | 12.48972  | 18.02716  | 18.97112 | 9.274542 | 14.95261 | 16.89677 | 14.02557 | 24.40615 | 41.26003 | 37.24935 | 25.89766  | -0.5115  | 0.264133 | -0.21174 | 0.699319 | 0.600794 | 0.372568 |
| ATSG60150 | ATSG60150 | 46.36725 | 41.03766  | 23.17778  | 29.69392 | 35.11077 | 42.86415 | 45.35448 | 37.76115 | 31.23987 | 51.81492 | 43.90102 | 45.57989  | -0.05957 | 0.887181 | 0.051531 | 0.909112 | 0.338822 | 0.558    |
| ATSG60160 | ATSG60160 | 455.3502 | 401.4554  | 437.8025  | 574.4994 | 581.6463 | 583.1519 | 509.5709 | 539.445  | 479.3368 | 514.3111 | 501.5359 | 425.7576  | 0.417039 | 0.000968 | 0.232061 | 0.104478 | 0.14854  | 0.503711 |
| ATSG60170 | ATSG60170 | 825.0993 | 843.9484  | 761.0037  | 642.9559 | 561.7722 | 701.7759 | 782.5871 | 835.0608 | 435.4057 | 663.9987 | 780.906  | 689.9137  | -0.33991 | 0.138194 | -0.23565 | 0.352734 | -0.18157 | 0.661167 |
| ATSG60180 | APUM19    | 4.755616 | 1.784246  | 2.575309  | 0.412416 | 1.987402 | 0.996841 | 2.66791  | 2.15778  | 0        | 1.919071 | 2.660668 | 2.071813  | -0.7493  | 0.28056  | -0.47567 | 0.538776 | -0.26574 | NA       |
| ATSG60190 | NEDP1     | 53.50068 | 58.88012  | 64.38272  | 68.8734  | 79.49607 | 65.79149 | 65.80846 | 60.41784 | 89.51663 | 67.16749 | 85.14137 | 45.57989  | 0.266552 | 0.384726 | 0.27709  | 0.398645 | 0.142748 | 0.814283 |
| ATSG60200 | DOFS_3    | 14.74241 | 101.1202  | 101.10395 | 99.39215 | 78.17114 | 93.70303 | 93.70303 | 93.70303 | 99.57709 | 115.1443 | 121.0604 | 118.0933  | -0.44526 | 0.039863 | -0.42169 | 0.070319 | -0.07576 | 0.879579 |
| ATSG60210 | ICR3      | 313.8706 | 335.4383  | 287.1469  | 304.7751 | 331.8961 | 366.8374 | 369.9502 | 383.0059 | 396.3559 | 322.404  | 284.6915 | 374.9982  | 0.095386 | 0.605331 | 0.294266 | 0.077532 | 0.074794 | 0.831533 |
| ATSG60220 | TET4      | 2.377808 | 0         | 5.150617  | 7.42348  | 12.58688 | 8.971567 | 15.86095 | 8.63112  | 6.833722 | 4.797678 | 2.660668 | 2.071813  | 1.248488 | 0.031069 | 1.161792 | 0.058503 | 0.104709 | NA       |
| ATSG60230 | SEN2      | 67.76752 | 57.09587  | 63.09056  | 41.24156 | 70.22153 | 60.80729 | 52.46819 | 57.18117 | 41.97858 | 53.734   | 62.5257  | 50.75942  | -0.14488 | 0.666073 | -0.3021  | 0.36449  | -0.17435 | 0.767978 |
| ATSG60240 | ATSG60240 | 0        | 0         | 0         | 0        | 0        | 0        | 0        | 0        | 0        | 0        | 0        | 0         | #N/A     | #N/A     | #N/A     | #N/A     | #N/A     | #N/A     |
| ATSG60250 | ATSG60250 | 8.322328 | 10.70548  | 11.58889  | 11.96005 | 10.59948 | 10.96525 | 8.003731 | 10.7889  | 12.6912  | 15.35257 | 9.312338 | 10.35907  | 0.123696 | 0.836218 | 0.032889 | 0.96157  | 0.185545 | NA       |
| ATSG60260 | ATSG60260 | 2.377808 | 0         | 1.287654  | 0.824831 | 0        | 0        | 1.778607 | 0        | 0.976246 | 0        | 0        | 1.035907  | -0.47004 | NA       | -0.12357 | NA       | -0.41392 | NA       |
| ATSG60270 | LECRK17   | 77.27876 | 69.5856   | 65.67037  | 63.512   | 81.48347 | 100.6809 | 99.60199 | 117.599  | 102.5058 | 66.20796 | 55.87403 | 65.67508  | 0.172182 | 0.551263 | 0.561989 | 0.028656 | -0.08842 | 0.880466 |
| ATSG60280 | LECRK18   | 73.71204 | 74.93833  | 70.82099  | 103.9287 | 119.2441 | 152.5166 | 118.2774 | 96.0212  | 85.90965 | 60.45074 | 85.14137 | 48.68761  | 0.732744 | 0.003463 | 0.435566 | 0.125171 | -0.18187 | 0.739371 |
| ATSG60285 | ATSG60285 | 0        | 0         | 0         | 2.886909 | 6.624673 | 3.987363 | 1.778607 | 0        | 3.904984 | 0        | 0        | 0         | 1.57045  | 0.009409 | 0.814724 | 0.226245 | 0        | NA       |
| ATSG60290 | ATSG60290 | 14.26685 | 10.70548  | 11.58889  | 3.71174  | 0.662467 | 5.981045 | 8.003731 | 8.63112  | 9.282738 | 11.51443 | 13.30334 | 10.35907  | -1.44381 | 0.006236 | -0.72013 | 0.226257 | -0.05128 | NA       |
| ATSG60300 | LECRK19   | 212.8138 | 148.0924  | 168.6827  | 92.38109 | 76.8462  | 103.6714 | 133.3955 | 147.8079 | 106.4108 | 128.5778 | 139.6851 | 141.9192  | -0.94625 | 2.23E-06 | -0.44865 | 0.043711 | -0.36919 | 0.263611 |
| ATSG60310 | LECRK110  | 4.755616 | 5.352738  | 1.510617  | 1.649662 | 1.324935 | 1.993682 | 8.003731 | 2.15778  | 4.88123  | 5.757214 | 3.991002 | 4.143626  | -0.12272 | 0.10633  | 0.0      |          |          |          |

|           |           |          |          |          |          |          |          |          |          |          |          |          |          |          |          |           |          |          |          |
|-----------|-----------|----------|----------|----------|----------|----------|----------|----------|----------|----------|----------|----------|----------|----------|----------|-----------|----------|----------|----------|
| ATSG60800 | ATSG60800 | 156.9353 | 206.9725 | 148.0802 | 839.6781 | 937.3912 | 831.3652 | 760.3545 | 775.7219 | 1635.212 | 87.31774 | 95.78405 | 107.7343 | 2.239961 | 3.31E-19 | 2.509225  | 6.12E-24 | -0.75972 | 0.045936 |
| ATSG60805 | ATSG60805 | 0        | 0        | 0        | 0        | 0        | 0        | 0        | 0        | 0        | 0        | 0        | 0        | #N/A     | #N/A     | #N/A      | #N/A     | #N/A     | #N/A     |
| ATSG60810 | RGF1      | 0        | 0        | 0        | 0        | 0        | 0        | 0        | 0        | 0        | 0        | 0        | 0        | #N/A     | #N/A     | #N/A      | #N/A     | #N/A     | #N/A     |
| ATSG60820 | ATSG60820 | 110.5681 | 107.0548 | 115.8889 | 129.0861 | 124.5438 | 144.5419 | 120.9453 | 125.1512 | 144.4844 | 110.3466 | 118.3997 | 130.5242 | 0.239651 | 0.239161 | 0.218984  | 0.326078 | 0.100889 | 0.810026 |
| ATSG60830 | AtbZ1P70  | 1.188904 | 0        | 1.287654 | 0        | 0.824831 | 0        | 2.990522 | 0.889307 | 0        | 0.995336 | 1.330334 | 0        | 0.152411 | NA       | -0.29033  | NA       | -0.0208  | NA       |
| ATSG60840 | ATSG60840 | 21.17071 | 330.0855 | 324.4889 | 275.4936 | 329.9087 | 244.226  | 169.857  | 132.7035 | 272.3726 | 241.803  | 282.0308 | 265.1921 | -0.11475 | 0.693011 | -0.6577   | 0.006877 | -0.06119 | 0.61756  |
| ATSG60850 | DOBS      | 64.01892 | 526.3526 | 502.1852 | 284.5667 | 274.9239 | 339.9417 | 212.5435 | 234.1191 | 205.9879 | 503.7562 | 578.6953 | 394.6804 | -0.88969 | 1.27E-07 | -1.32838  | 3.6E-15  | -0.17725 | 0.589239 |
| ATSG60860 | RAFA1     | 223.5139 | 331.8698 | 347.6667 | 127.8488 | 142.4305 | 147.5324 | 115.6095 | 96.0212  | 135.6982 | 296.4965 | 264.7365 | 305.5924 | -1.08316 | 1.23E-08 | -1.08316  | 1.23E-08 | -0.05011 | 0.919568 |
| ATSG60870 | ATSG60870 | 30.9115  | 24.97944 | 36.05432 | 35.88015 | 29.81103 | 26.9147  | 21.34328 | 25.89336 | 28.31113 | 29.7456  | 21.28534 | 40.40035 | 0.016815 | 0.970336 | -0.27854  | 0.511008 | -0.00555 | 0.995576 |
| ATSG60880 | BASL      | 13.07794 | 10.70548 | 3.826963 | 30.93117 | 21.86142 | 27.91154 | 16.00746 | 19.42002 | 26.35864 | 16.31211 | 25.27635 | 20.71817 | 1.324939 | 0.001532 | 0.958909  | 0.037499 | 0.956937 | 0.136331 |
| ATSG60890 | MYB34     | 260.37   | 219.4623 | 224.0519 | 121.2502 | 136.4683 | 133.5767 | 146.7351 | 112.2046 | 99.57709 | 240.8434 | 223.4961 | 101.7343 | -0.8344  | 7.6E-06  | -0.94727  | 0.478-07 | 0.114709 | 0.776713 |
| ATSG60900 | RLK1      | 286.5259 | 253.3629 | 239.5037 | 684.1974 | 616.0946 | 771.5548 | 408.1903 | 439.1082 | 321.1849 | 94.99403 | 106.4267 | 122.237  | 1.381208 | 1.33E-17 | 0.569806  | 0.001462 | -1.23504 | 4.39E-10 |
| ATSG60910 | AGL8      | 84.41218 | 82.07532 | 66.95803 | 107.228  | 68.23413 | 64.79465 | 76.4801  | 91.70564 | 69.31347 | 98.83217 | 99.77505 | 102.5547 | 0.065677 | 0.842991 | 0.022433  | 0.951475 | 0.354053 | 0.41486  |
| ATSG60920 | COB       | 2425.364 | 2021.551 | 1934.057 | 1056.609 | 969.1896 | 1136.398 | 937.3259 | 1021.709 | 894.2413 | 1636.968 | 2019.447 | 1526.926 | -0.99959 | 9.36E-13 | -1.14497  | 2.82E-16 | -0.29731 | 0.18969  |
| ATSG60930 | ATSG60930 | 269.8812 | 201.6198 | 190.5728 | 176.5139 | 178.2037 | 176.4408 | 145.8458 | 207.1469 | 140.5794 | 248.5197 | 279.3701 | 211.3249 | -0.31424 | 0.153672 | -0.42067  | 0.060952 | 0.146906 | 0.723696 |
| ATSG60940 | CST50     | 206.8693 | 185.5616 | 230.4901 | 244.9749 | 286.8483 | 265.1596 | 231.2189 | 243.8291 | 211.8454 | 198.6239 | 220.8354 | 238.2585 | 0.340398 | 0.038796 | 0.131091  | 0.516705 | 0.06897  | 0.856415 |
| ATSG60945 | ATSG60945 | 0        | 0        | 0        | 0        | 0        | 0        | 0        | 0        | 0        | 0        | 0        | 0        | #N/A     | #N/A     | #N/A      | #N/A     | #N/A     | #N/A     |
| ATSG60950 | COB15     | 57.06739 | 71.36984 | 66.95803 | 294.8771 | 282.8735 | 249.2102 | 115.6095 | 90.62675 | 122.0307 | 36.46235 | 30.59768 | 22.78994 | 2.043775 | 1.25E-24 | 0.735849  | 0.001342 | -1.03727 | 0.000868 |
| ATSG60960 | PNM1      | 398.2828 | 388.9656 | 341.2284 | 322.0966 | 357.0699 | 311.0143 | 299.6953 | 329.0614 | 373.9022 | 399.1668 | 389.7879 | 385.3572 | -0.18371 | 0.24123  | -0.16817  | 0.321045 | 0.058039 | 0.861847 |
| ATSG60963 | ATSG60963 | 0        | 0        | 0        | 0        | 0        | 0        | 0        | 0        | 0        | 0        | 0        | 0        | #N/A     | #N/A     | #N/A      | #N/A     | #N/A     | #N/A     |
| ATSG60964 | ATSG60964 | 0        | 0        | 0        | 0        | 0        | 0        | 0        | 0        | 0        | 0        | 0        | 0        | #N/A     | #N/A     | #N/A      | #N/A     | #N/A     | #N/A     |
| ATSG60966 | ATSG60966 | 0        | 0        | 0        | 0        | 0        | 0        | 0        | 0        | 0        | 0        | 0        | 0        | #N/A     | #N/A     | #N/A      | #N/A     | #N/A     | #N/A     |
| ATSG60970 | TCP5      | 85.60108 | 83.85956 | 114.6012 | 132.7978 | 123.2189 | 148.5293 | 128.0597 | 106.8101 | 67.36097 | 101.7108 | 122.3907 | 95.3034  | 0.481342 | 0.061328 | 0.082143  | 0.814201 | 0.151161 | 0.778505 |
| ATSG60978 | ATSG60978 | 0        | 0        | 0        | 1.324935 | 0.996841 | 0        | 0        | 0        | 0        | 0        | 0        | 0        | 0.378333 | NA       | 0         | 0.281171 | 0.169764 | NA       |
| ATSG60980 | ATSG60980 | 630.1191 | 520.9998 | 511.1988 | 525.8299 | 510.0998 | 527.3288 | 460.6592 | 456.3704 | 553.5315 | 470.1725 | 476.2596 | 532.456  | -0.09057 | 0.59271  | -0.17739  | 0.281171 | -0.16897 | 0.508    |
| ATSG60990 | RH10      | 187.8468 | 140.9554 | 217.6136 | 226.0037 | 211.3271 | 199.3682 | 213.4328 | 236.2769 | 230.3941 | 174.6355 | 174.2738 | 227.8994 | 0.207584 | 0.322498 | 0.295244  | 0.163841 | 0.066083 | 0.882426 |
| ATSG61000 | RA1D      | 166.4466 | 101.702  | 141.642  | 129.0861 | 116.5942 | 110.6493 | 105.8271 | 94.94231 | 147.7685 | 147.7685 | 147.6671 | 172.9964 | -0.20515 | 0.39354  | -0.55257  | 0.015011 | 0.17258  | 0.679323 |
| ATSG61010 | ATEX07E2  | 562.3516 | 453.1985 | 379.858  | 588.9294 | 739.3135 | 693.8012 | 739.0112 | 653.8073 | 594.5338 | 339.6756 | 333.9138 | 339.7773 | 0.521497 | 0.002139 | 0.499122  | 0.004329 | -0.45365 | 0.05915  |
| ATSG61020 | ECT3      | 758.5207 | 667.308  | 736.5383 | 731.2128 | 714.8022 | 705.7633 | 699.8818 | 701.2785 | 745.8519 | 687.0275 | 709.068  | 763.7614 | -0.0096  | 0.950262 | -0.01383  | 0.930978 | -0.00544 | 0.987026 |
| ATSG61030 | RGB3      | 115.3237 | 80.29107 | 90.1358  | 114.6515 | 105.9948 | 94.69987 | 59.58333 | 64.7334  | 88.8339  | 99.79171 | 74.4987  | 65.26211 | 0.134532 | 0.650651 | -0.41729  | 0.136517 | -0.24931 | 0.959343 |
| ATSG61040 | ATSG61040 | 197.3581 | 196.2671 | 212.463  | 143.1082 | 142.4305 | 146.5356 | 184.0858 | 175.8591 | 156.1994 | 225.4909 | 244.7815 | 191.6427 | -0.48294 | 0.003172 | -0.22826  | 0.230015 | 0.11968  | 0.71872  |
| ATSG61050 | ATSG61050 | 0        | 0        | 0        | 0        | 0        | 0.662467 | 0        | 0.889303 | 0        | 0.995936 | 0        | 0        | 0.100335 | NA       | 0.144523  | NA       | 0.157063 | NA       |
| ATSG61060 | HDAS      | 287.7148 | 264.0684 | 186.7099 | 324.9835 | 349.1203 | 358.8627 | 346.8284 | 316.1148 | 280.1262 | 229.329  | 186.2468 | 215.466  | 0.473397 | 0.009658 | 0.347332  | 0.081137 | -0.21597 | 0.522233 |
| ATSG61070 | HD1A      | 33.28931 | 21.41095 | 15.45185 | 43.71605 | 34.4483  | 30.90206 | 27.56841 | 29.13003 | 16.59618 | 17.27164 | 18.62468 | 23.82855 | 0.589989 | 0.124172 | 0.039678  | 0.941887 | -0.22058 | 0.788537 |
| ATSG61090 | ATSG61090 | 3.566712 | 1.784246 | 2.575309 | 5.73818  | 6.624673 | 8.971567 | 7.114428 | 2.15778  | 2.928738 | 3.838143 | 6.65167  | 2.071813 | 0.898496 | 0.153238 | 0.339247  | 0.6624   | 0.319659 | NA       |
| ATSG61100 | ATSG61100 | 7.133424 | 5.352738 | 2.575309 | 3.71174  | 4.637271 | 3.987363 | 8.893035 | 2.15778  | 2.928738 | 0.575214 | 3.991002 | 8.287252 | -0.21254 | 0.775691 | -0.05244  | 0.95036  | 0.195998 | NA       |
| ATSG61110 | ATSG61110 | 0        | 0        | 1.287654 | 0        | 0        | 0        | 0        | 0        | 0        | 0        | 0        | 0        | -0.22221 | NA       | -0.2076   | NA       | -0.03666 | NA       |
| ATSG61120 | ATSG61120 | 3.566712 | 3.568492 | 1.287654 | 6.598469 | 9.937009 | 0.996841 | 5.11816  | 8.63112  | 6.833722 | 6.716749 | 5.321336 | 7.251346 | 0.666696 | 0.303308 | 1.232215  | 0.046244 | 0.712811 | NA       |
| ATSG61130 | PDCB1     | 479.1283 | 371.1232 | 444.2407 | 334.469  | 314.672  | 333.9417 | 235.6614 | 252.4602 | 252.8477 | 503.7562 | 473.5989 | 376.0341 | -0.39633 | 0.012616 | -0.79758  | 2.51E-07 | 0.057322 | 0.876205 |
| ATSG61140 | ATSG61140 | 716.9091 | 594.1539 | 582.0198 | 387.6706 | 328.5838 | 419.67   | 510.4602 | 595.5472 | 389.5222 | 579.5595 | 556.0796 | 613.2567 | -0.72511 | 2.74E-05 | -0.33549  | 0.084354 | -0.11293 | 0.762006 |
| ATSG61150 | VIP4      | 527.8734 | 462.1197 | 475.1445 | 488.238  | 476.314  | 506.3951 | 450.8769 | 578.285  | 573.0564 | 421.2361 | 445.6619 | 476.517  | -0.00012 | 0.999765 | -0.122979 | 0.084026 | -0.12644 | 0.646732 |
| ATSG61160 | ACT       | 13.07794 | 23.1952  | 12.87654 | 1.649662 | 1.324935 | 0.996841 | 117.3881 | 129.4668 | 136.6744 | 4.797678 | 7.982004 | 25.89766 | -2.41622 | 3.07E-07 | 2.77544   | 9.35E-14 | -0.24968 | 0.791433 |
| ATSG61170 | RPS19C    | 904.7559 | 842.1641 | 855.0025 | 1109.81  | 1070.547 | 853.2957 | 689.2102 | 675.3851 | 972.341  | 1090.992 | 1168.033 | 1082.522 | 0.219002 | 0.236967 | -0.15258  | 0.459807 | 0.353269 | 0.159404 |
| ATSG61180 | ATSG61180 | 0        | 0        | 0        | 0.662467 | 0.996841 | 1.778607 | 0        | 0.97246  | 1.019197 | 1.019197 | 0        | 0        | 0.228496 | NA       | 0.440967  | NA       | 0.318286 | NA       |
| ATSG61190 | ATSG61190 | 236.5919 | 240.8732 | 200.8741 | 216.1058 | 192.778  | 256.1881 | 179.6339 | 258.9336 | 203.0592 | 243.722  | 231.4781 | 211.3249 | -0.03154 | 0.901855 | -0.07972  | 0.755528 | 0.019549 | 0.97086  |
| ATSG61200 | ATSG61200 | 90.35657 | 71.36984 | 112.0259 | 115.5195 | 71.54647 | 68.78201 | 55.13682 | 58.26006 | 70.28971 | 112.2657 | 103.766  | 124.3088 | -0.52433 | 0.032889 | -0.56269  | 0.029697 | 0.29402  | 0.481893 |
| ATSG61210 | SNAP33    | 652.7083 | 669.0923 | 606.4852 | 1159.713 | 1197.078 | 1244.057 | 1092.954 | 1088.6   | 949.8874 | 578.6    | 546.7673 | 532.456  | 0.89402  | 2.38E-17 | 0.695087  | 1.48E-10 | -0.21381 | 0.250598 |
| ATSG61220 | ATSG61220 | 85.60108 | 98.13353 | 97.86173 | 141.871  | 153.0299 | 88.71883 | 99.60199 | 69.04896 | 150.3419 | 75.80331 | 47.89202 | 96.33931 | 0.428522 | 0.20401  | 0.172151  | 0.671566 | -0.31951 | 0.589945 |
| ATSG61228 | CPuORF15  | 0        | 0        | 0        | 0        | 0        | 0        | 0        | 0        | 0        | 0        | 0        | 0        | #N/A     | #N/A     | #N/A      | #N/A     | #N/A     | #N/A     |
| ATSG61230 | ATSG61230 | 0        | 0        | 0        | 0        | 0        | 0        | 0        | 0        | 0        | 0        | 0        | 0        | #N/A     | #N/A     | #N/A      | #N/A     | #N/A     | #N/A     |
| ATSG61240 | ATSG61240 | 322.193  | 344.3595 | 410.7617 | 388.9079 | 348.4578 | 412.6921 | 332.5995 | 342.0081 | 245.0377 | 316.6468 | 325.9318 | 304.5565 | 0.09053  | 0.663587 | -0.22495  | 0.253918 | -0.18363 | 0.560244 |
| ATSG61250 | AtGUS1    | 64.20081 | 42.60615 | 65.67037 | 203.7333 | 218.6142 | 191.3934 | 102.2699 | 117.599  | 72.2422  | 45.09817 | 38.57969 | 40.40035 | 1.737427 | 1.97E-15 | 0.688334  | 0.006293 | -0.49798 | 0.252802 |
| ATSG61260 | ATSG61260 | 9.511232 | 12.48872 | 9.01358  | 18.97112 | 25.17376 | 21.9305  | 13.33955 | 15.10446 | 7.809968 | 12.47396 | 21.28534 | 7.251346 | 0.950962 | 0.036992 | 0.18864   | 0.764258 | 0.311612 | 0.92     |
| ATSG61270 | BHLH72    | 342.4043 | 376.     |          |          |          |          |          |          |          |          |          |          |          |          |           |          |          |          |

|           |           |          |          |          |          |          |          |          |          |          |           |          |          |          |          |           |          |          |          |
|-----------|-----------|----------|----------|----------|----------|----------|----------|----------|----------|----------|-----------|----------|----------|----------|----------|-----------|----------|----------|----------|
| ATSG61730 | ATATH11   | 1.188904 | 0        | 2.575309 | 0.824831 | 2.649869 | 0.996841 | 2.66791  | 2.15778  | 1.952492 | 0.959536  | 0        | 1.035907 | 0.05626  | 0.948145 | 0.35737   | 0.651463 | -0.29508 | NA       |
| ATSG61740 | ATATH14   | 43.98945 | 37.46917 | 46.35556 | 47.01538 | 35.11077 | 37.87995 | 31.12562 | 45.31338 | 32.21612 | 35.50282  | 46.56169 | 40.40035 | -0.07841 | 0.835386 | -0.23853  | 0.519652 | -0.07762 | 0.916924 |
| ATSG61750 | ATSG61750 | 2.377808 | 0        | 0        | 0        | 0        | 0        | 0        | 0        | 0        | 0         | 0        | 0        | -0.32938 | NA       | -0.31889  | NA       | -0.31551 | NA       |
| ATSG61760 | IPK2B     | 127.2127 | 117.7602 | 124.9025 | 169.9152 | 175.5538 | 152.5166 | 135.1741 | 116.5201 | 162.0568 | 140.0922  | 137.0244 | 129.4883 | 0.421383 | 0.024854 | 0.155964  | 0.503997 | 0.128981 | 0.743627 |
| ATSG61770 | PPAN      | 204.4915 | 221.2465 | 239.5037 | 250.7487 | 268.9617 | 237.2481 | 283.6878 | 222.2513 | 321.1849 | 221.6527  | 252.7635 | 225.8276 | 0.185311 | 0.341287 | 0.311077  | 0.104169 | 0.069922 | 0.864774 |
| ATSG61780 | Tudor     | 865.5221 | 538.8423 | 592.321  | 401.6928 | 430.6037 | 422.6605 | 445.541  | 539.445  | 447.1207 | 514.3111  | 545.4369 | 600.8258 | -0.66026 | 0.000024 | -0.47403  | 0.013175 | -0.26436 | 0.392253 |
| ATSG61790 | CNX1      | 15.7776  | 1388.143 | 1294.093 | 3935.269 | 4215.942 | 4212.649 | 2542.519 | 3048.943 | 3376.835 | 1219.57   | 1285.103 | 1110.492 | 1.517139 | 1.48E-32 | 1.05943   | 3.64E-16 | -0.23466 | 0.300853 |
| ATSG61800 | PCMP-18   | 11.88904 | 14.27397 | 14.1642  | 16.90904 | 15.89921 | 23.92418 | 13.33955 | 21.5778  | 16.51994 | 16.31211  | 10.64267 | 18.64632 | 0.412024 | 0.377525 | 0.276127  | 0.609042 | -0.17463 | 0.86061  |
| ATSG61810 | ATSG61810 | 247.292  | 296.1848 | 262.6815 | 233.4272 | 208.6772 | 290.0807 | 204.5398 | 249.2236 | 257.7289 | 272.5081  | 194.2288 | 297.3052 | -0.1372  | 0.56686  | -0.17276  | 0.486523 | -0.0657  | 0.89041  |
| ATSG61820 | ATSG61820 | 180.7134 | 201.6198 | 206.0247 | 319.2097 | 292.1481 | 412.6921 | 469.5522 | 496.2894 | 306.5412 | 284.9821  | 238.1298 | 250.6894 | 0.771297 | 0.00023  | 1.080112  | 1.35E-07 | 0.385274 | 0.260845 |
| ATSG61830 | ATSG61830 | 128.4016 | 142.7397 | 137.1779 | 119.1881 | 147.7302 | 118.2241 | 148.5137 | 98.17898 | 136.6744 | 132.4159  | 109.0874 | 156.4219 | -0.07856 | 0.776655 | -0.08197  | 0.783492 | -0.0286  | 0.961629 |
| ATSG61835 | ATSG61835 | 0        | 0        | 0        | 0        | 0        | 0        | 0        | 0        | 0        | 0         | 0        | 0        | #N/A     | #N/A     | #N/A      | #N/A     | #N/A     | #N/A     |
| ATSG61840 | IRX10L    | 297.226  | 260.4999 | 270.4074 | 297.3516 | 306.0599 | 306.0301 | 261.4552 | 298.8525 | 246.9902 | 288.8202  | 268.7275 | 269.3357 | 0.127663 | 0.431528 | -0.04302  | 0.830375 | -0.00517 | 0.990348 |
| ATSG61850 | LFY       | 8.322328 | 3.568492 | 5.150617 | 3.299325 | 3.312336 | 2.990522 | 2.66791  | 3.23667  | 3.904984 | 2.878607  | 9.312338 | 5.179533 | -0.59556 | 0.363924 | -0.56443  | 0.426792 | -0.03717 | NA       |
| ATSG61865 | ATSG61865 | 10.70014 | 12.48972 | 11.58889 | 11.54764 | 16.56168 | 22.92734 | 21.34328 | 17.26224 | 15.61994 | 14.33053  | 6.65167  | 13.46678 | 0.433697 | 0.383154 | 0.558302  | 0.276421 | 0.020167 | NA       |
| ATSG61880 | ATSG61880 | 26.15589 | 41.03766 | 52.79383 | 82.89553 | 105.9948 | 78.75042 | 56.91542 | 63.65451 | 98.60085 | 58.53167  | 62.5257  | 47.47127 | 1.090633 | 0.000281 | 0.812806  | 0.012027 | 0.411532 | 0.459281 |
| ATSG61890 | ERF114    | 3.566712 | 5.352738 | 3.862963 | 13.1973  | 10.59948 | 18.93997 | 10.67164 | 12.94668 | 14.64369 | 6.716749  | 6.65167  | 2.071817 | 1.330642 | 0.01059  | 1.199358  | 0.300444 | 0.158825 | NA       |
| ATSG61900 | BON1      | 0        | 0        | 3.862963 | 0        | 0        | 0        | 0        | 0        | 1.07889  | 0.972626  | 1.330334 | 2.071813 | -0.68599 | NA       | -0.25457  | NA       | -0.06599 | NA       |
| ATSG61910 | BON1      | 128.2696 | 189.1301 | 191.8605 | 110.9398 | 82.80841 | 159.4945 | 149.403  | 151.0446 | 73.21845 | 199.5834  | 198.2198 | 163.6732 | -0.7572  | 0.007073 | -0.66986  | 0.023425 | -0.114   | 0.859725 |
| ATSG61920 | FLX14     | 8.322328 | 14.27397 | 19.31482 | 10.92213 | 21.86142 | 14.95261 | 19.56468 | 18.34113 | 25.3824  | 13.4335   | 21.28534 | 18.64632 | 0.094909 | 0.857828 | 0.386019  | 0.430254 | 0.147838 | 0.879034 |
| ATSG61930 | AP03      | 72.52314 | 73.15409 | 86.27284 | 87.24452 | 80.82101 | 78.75042 | 86.26244 | 90.62675 | 77.12443 | 81.56053  | 94.45371 | 78.7289  | 0.09481  | 0.723098 | 0.122448  | 0.664537 | 0.120514 | 0.798327 |
| ATSG61940 | ATSG61940 | 47.55616 | 46.39049 | 37.34198 | 30.93117 | 35.77323 | 51.83572 | 39.12935 | 58.26006 | 35.14466 | 43.19071  | 29.93701 | 59.04667 | -0.16211 | 0.697319 | 0.00092   | 0.984987 | 0.005065 | 0.9607   |
| ATSG61950 | ATSG61950 | 58.25629 | 55.31163 | 47.64321 | 42.89122 | 43.06037 | 51.83572 | 76.4801  | 49.62894 | 36.1211  | 50.85539  | 53.21336 | 52.83123 | -0.22542 | 0.508618 | 0.017194  | 0.967597 | -0.03707 | 0.963016 |
| ATSG61960 | ML1       | 726.4203 | 672.6608 | 606.4852 | 466.0296 | 427.9539 | 521.3477 | 517.5746 | 613.8884 | 441.2632 | 536.3804  | 493.5539 | 546.9586 | -0.49782 | 0.00128  | -0.34653  | 0.037627 | -0.34041 | 0.142025 |
| ATSG61970 | ATSG61970 | 523.1177 | 492.4519 | 488.021  | 474.2779 | 505.4625 | 494.433  | 503.3458 | 491.9738 | 449.0732 | 443.3003  | 423.0462 | 450.6193 | -0.03117 | 0.838488 | -0.05859  | 0.707655 | -0.18939 | 0.330592 |
| ATSG61980 | AGD1      | 23.77808 | 21.41095 | 16.73951 | 20.62078 | 23.18635 | 20.93366 | 16.26677 | 30.20892 | 14.64369 | 29.7456   | 13.30334 | 31.0772  | 0.054376 | 0.919295 | -0.01725  | 0.976516 | 0.254055 | 0.76016  |
| ATSG61990 | ATSG61990 | 129.5905 | 132.0342 | 95.28462 | 63.512   | 58.95959 | 82.73778 | 86.26244 | 98.17898 | 63.45599 | 86.35821  | 89.13238 | 104.6266 | -0.07862 | 0.000856 | -0.50331  | 0.050326 | -0.33053 | 0.417832 |
| ATSG61997 | ATSG61997 | 0        | 0        | 0        | 0        | 0        | 0        | 0.889303 | 1.07889  | 0        | 0         | 0        | 0        | 0        | 0        | 0.3225    | NA       | 0        | NA       |
| ATSG62000 | ARF2      | 2959.182 | 2801.266 | 2554.706 | 1746.992 | 1459.415 | 1953.808 | 2022.276 | 2490.078 | 1631.307 | 2136.886  | 2144.498 | 2180.583 | -0.67614 | 3.77E-05 | -0.42881  | 0.014772 | -0.35697 | 0.155459 |
| ATSG62020 | HSF2A     | 58.25629 | 76.72258 | 65.67037 | 108.4653 | 83.47088 | 148.5293 | 124.5025 | 168.3068 | 166.9381 | 65.24842  | 58.53469 | 71.47755 | 0.725301 | 0.005158 | 1.153153  | 4.07E-06 | -0.0237  | 0.975947 |
| ATSG62030 | ATSG62030 | 184.2801 | 208.7568 | 167.3951 | 151.3565 | 163.6294 | 175.444  | 184.9751 | 182.3324 | 198.1779 | 167.9187  | 204.8714 | 163.6732 | -0.18956 | 0.316343 | 0.020817  | 0.932882 | -0.06119 | 0.879636 |
| ATSG62040 | BFT       | 2.377808 | 1.784246 | 2.575309 | 0.824831 | 0        | 0.996841 | 0        | 0.996841 | 0        | 0.996841  | 0        | 0.996841 | -0.85288 | 0.207831 | -0.37345  | 0.641747 | 1.57153  | NA       |
| ATSG62050 | OXA1      | 203.2036 | 194.4828 | 204.737  | 244.15   | 225.9013 | 224.2892 | 249.8943 | 261.0914 | 204.0354 | 173.6759  | 232.8084 | 181.2836 | 0.202047 | 0.288606 | 0.239571  | 0.227064 | -0.04558 | 0.917438 |
| ATSG62060 | ATSG62060 | 0        | 1.784246 | 0        | 0        | 0        | 0        | 0        | 0        | 0        | 0         | 0        | 0        | -0.2184  | NA       | -0.20558  | NA       | -0.19198 | NA       |
| ATSG62065 | LTP14     | 0        | 1.784246 | 0        | 0        | 0.662467 | 0        | 0        | 0        | 0        | 0         | 0        | 0        | -0.14593 | NA       | -0.24789  | NA       | 0.195098 | NA       |
| ATSG62070 | IQD23     | 164.0687 | 162.3664 | 169.9704 | 230.1279 | 184.1659 | 198.3713 | 176.0821 | 169.3857 | 188.4155 | 129.5373  | 111.7481 | 119.1293 | 0.304846 | 0.08649  | 0.102619  | 0.647513 | -0.44779 | 0.077727 |
| ATSG62080 | ATSG62080 | 3.566712 | 23.1952  | 15.45185 | 4.536571 | 2.649869 | 0        | 1.07889  | 0        | 1.07889  | 0         | 56.6126  | 19.95501 | -2.25389 | 0.009119 | -1.25389  | 0.00016  | 0.909035 | NA       |
| ATSG62090 | SLK2      | 489.8284 | 451.4142 | 414.6247 | 331.1697 | 262.9995 | 378.7995 | 340.6032 | 412.136  | 311.4225 | 377.0975  | 399.1002 | 410.219  | -0.47407 | 0.006253 | -0.34459  | 0.066107 | -0.1897  | 0.549468 |
| ATSG62100 | BAG2      | 54.68958 | 73.15409 | 91.42346 | 52.37678 | 41.73544 | 52.83256 | 37.35075 | 36.68226 | 58.57476 | 96.9131   | 95.78405 | 105.6625 | -0.54743 | 0.046219 | -0.682331 | 0.017574 | 0.432497 | 0.303489 |
| ATSG62110 | ATSG62110 | 0        | 0        | 0        | 0        | 0        | 0        | 1.07889  | 0        | 0        | 0         | 0        | 0        | 0        | 0        | 0         | NA       | 0        | NA       |
| ATSG62120 | ARR23     | 0        | 0        | 0        | 0        | 0        | 0        | 0        | 0        | 0        | 0         | 0        | 0        | #N/A     | #N/A     | #N/A      | #N/A     | #N/A     | #N/A     |
| ATSG62130 | ATSG62130 | 312.6817 | 235.5205 | 231.7778 | 148.882  | 180.1911 | 181.425  | 116.4988 | 114.3623 | 73.21845 | 260.0342  | 275.3791 | 266.228  | -0.60668 | 0.002253 | -1.32314  | 1.9E-11  | 0.033462 | 0.949912 |
| ATSG62140 | ATSG62140 | 171.2022 | 176.6404 | 236.9284 | 188.4739 | 201.3901 | 153.5135 | 182.3072 | 188.8057 | 290.9213 | 373.2594  | 469.6079 | 286.9461 | -0.10048 | 0.748637 | 0.169249  | 0.586079 | 0.908825 | 0.001775 |
| ATSG62150 | ATSG62150 | 2.377808 | 1.784246 | 0        | 15.25938 | 19.87402 | 18.93997 | 20.45398 | 11.86779 | 16.59618 | 2.878607  | 3.991002 | 4.143626 | 2.394801 | 3.65E-06 | 2.26581   | 1.99E-09 | 0.556708 | NA       |
| ATSG62160 | ZIP12     | 0        | 0        | 1.287654 | 0.412416 | 0        | 0        | 0        | 0        | 0        | 0         | 0        | 0        | -0.11886 | NA       | -0.20136  | NA       | -0.19779 | NA       |
| ATSG62162 | MIR399C   | 0        | 0        | 0        | 0        | 0        | 0        | 0        | 0        | 0        | 0         | 0        | 0        | #N/A     | #N/A     | #N/A      | #N/A     | #N/A     | #N/A     |
| ATSG62165 | AGL42     | 42.80054 | 51.74313 | 45.0679  | 15.67179 | 11.92441 | 4.984204 | 16.00746 | 20.49891 | 6.833722 | 87.31774  | 71.83803 | 61.11849 | -1.79671 | 2.26E-07 | -1.51488  | 3.23E-05 | 0.634366 | 0.214789 |
| ATSG62170 | ATSG62170 | 150.9908 | 98.13353 | 84.98519 | 40.41673 | 39.74804 | 29.90522 | 35.57214 | 24.81447 | 29.28738 | 102.11542 | 110.4177 | 100.4829 | -1.51363 | 2.31E-09 | -1.79199  | 2.32E-11 | -0.14631 | 0.917121 |
| ATSG62180 | CXE20     | 26.15589 | 16.05821 | 23.17778 | 28.04426 | 29.14856 | 24.92102 | 28.45771 | 26.35864 | 27.82653 | 22.61568  | 24.86176 | 0.282279 | 0.47703  | 0.163485 | 0.272145  | 0.16414  | 0.838515 |          |
| ATSG62190 | RH7       | 2166.183 | 1816.362 | 1813.017 | 1363.033 | 1310.36  | 1545.103 | 1865.759 | 2101.678 | 1810.936 | 1510.309  | 1597.731 | 1599.44  | -0.45615 | 0.000208 | -0.00563  | 0.975297 | -0.29826 | 0.090897 |
| ATSG62200 | ATSG62200 | 103.4346 | 110.6233 | 100.437  | 199.1967 | 204.7024 | 184.4155 | 231.2189 | 225.488  | 250.8952 | 128.5778  | 170.2827 | 154.3501 | 0.891427 | 1.5E-07  | 1.14975   | 8.91E-12 | 0.509049 | 0.045791 |
| ATSG62210 | ATSG62210 | 54.68958 | 74.98333 | 50.21852 | 39.5919  | 38.4231  | 19.93682 | 22.23259 | 34.52448 | 33.19236 | 27.81592  | 135.6941 | 63.1903  | -0.76395 | 0.030226 | -0.90372  | 0.013637 | -0.58606 | 0.27087  |
| ATSG62220 | ATG118    | 404.2273 | 397.8869 | 316.763  | 134.4475 | 122.5564 | 161.4882 | 96.93408 | 118      |          |           |          |          |          |          |           |          |          |          |

|          |          |          |          |          |          |          |          |          |          |          |          |          |          |          |          |          |          |           |          |
|----------|----------|----------|----------|----------|----------|----------|----------|----------|----------|----------|----------|----------|----------|----------|----------|----------|----------|-----------|----------|
| ATS62730 | NPF4.7   | 23.77808 | 35.68492 | 24.46543 | 6.186234 | 7.28714  | 11.96209 | 3.557214 | 7.55223  | 7.809968 | 30.70514 | 26.60668 | 41.43626 | -1.56051 | 8.66E-05 | -1.8078  | 2.55E-05 | 0.256035  | 0.744238 |
| ATS62740 | HIR1     | 441.0834 | 628.0546 | 554.979  | 865.2479 | 898.9681 | 826.381  | 826.1629 | 896.5575 | 1079.728 | 566.126  | 553.4189 | 454.763  | 0.666455 | 4.48E-05 | 0.777062 | 1.77E-06 | -0.03999  | 0.926068 |
| ATS62750 | ATS62750 | 0        | 0        | 0        | 0        | 0        | 0        | 0        | 0        | 0        | 0        | 0        | 0        | #N/A     | #N/A     | #N/A     | #N/A     | #N/A      | #N/A     |
| ATS62760 | ATS62760 | 122.4571 | 92.78079 | 101.7247 | 138.984  | 135.8058 | 131.583  | 126.2811 | 125.1512 | 101.5296 | 132.4159 | 137.0244 | 132.596  | 0.34042  | 0.085004 | 0.137976 | 0.572191 | 0.320271  | 0.304889 |
| ATS62770 | ATS62770 | 40.42273 | 41.03766 | 51.50617 | 186.8243 | 171.579  | 178.4345 | 95.15547 | 87.39009 | 105.4346 | 23.02886 | 29.26735 | 22.78994 | 1.952413 | 1.85E-20 | 1.068319 | 3.74E-06 | -0.78729  | 0.035577 |
| ATS62780 | ATS62780 | 0        | 0        | 0        | 0        | 0        | 0        | 0.889303 | 0        | 0.976246 | 0.995936 | 0        | 0        | 0        | NA       | 0.330664 | NA       | 0.175063  | NA       |
| ATS62790 | DXR      | 1970.014 | 2076.862 | 1998.44  | 1218.276 | 1201.716 | 1252.032 | 1682.562 | 1614.019 | 1644.975 | 2336.469 | 2159.132 | 2384.657 | -0.71537 | 9.85E-18 | -0.28821 | 0.001501 | 0.187472  | 0.159175 |
| ATS62800 | ATS62800 | 0        | 1.784246 | 0        | 0        | 0        | 0        | 0.889303 | 1.07889  | 0        | 0.995936 | 0        | 2.071813 | -0.37758 | 0        | 0.080927 | NA       | 0.267511  | NA       |
| ATS62810 | PEX14    | 795.3767 | 747.5991 | 703.0593 | 749.3591 | 614.7696 | 723.7064 | 863.5137 | 940.792  | 746.8282 | 657.2819 | 562.7313 | 654.6929 | -0.10391 | 0.543105 | 0.180578 | 0.27857  | -0.25547  | 0.26757  |
| ATS62820 | ATS62820 | 16.64466 | 12.48972 | 20.60247 | 25.56977 | 24.51129 | 22.92734 | 31.12562 | 19.42002 | 12.6912  | 15.35257 | 15.96401 | 16.5745  | 0.482649 | 0.265414 | 0.29426  | 0.559343 | -0.07064  | 0.949285 |
| ATS62830 | ATS62830 | 0        | 0        | 0        | 0        | 0        | 0        | 0        | 0        | 0        | 0        | 1.330334 | 0        | 0        | NA       | 0.173262 | NA       | 0.478922  | 0.138182 |
| ATS62840 | ATS62840 | 134.3461 | 157.0137 | 171.258  | 99.80457 | 104.0074 | 64.79465 | 160.9639 | 166.1491 | 142.5319 | 217.8146 | 259.4151 | 175.0682 | -0.73711 | 0.000866 | 0.023025 | 0.942911 | 0.384222  | NA       |
| ATS62848 | MIR420   | 0        | 0        | 0        | 0        | 0        | 0        | 0.889303 | 0        | 0        | 0        | 1.330334 | 1.035907 | 0        | NA       | 0.162563 | NA       | 0.478922  | NA       |
| ATS62850 | SWEETS   | 7.133244 | 10.70548 | 12.87654 | 4.536571 | 4.637271 | 4.984204 | 16.00746 | 5.39445  | 7.809968 | 17.27164 | 13.30334 | 11.39497 | -0.88047 | 0.101059 | -0.0253  | 0.971995 | 0.39637   | NA       |
| ATS62860 | ATS62860 | 0        | 0        | 0        | 0        | 0        | 0        | 0        | 0        | 0        | 0        | 0        | 0        | #N/A     | #N/A     | #N/A     | #N/A     | #N/A      | #N/A     |
| ATS62865 | ATS62865 | 20.21137 | 17.84246 | 27.04074 | 70.11065 | 68.23413 | 85.72831 | 55.13682 | 69.04896 | 94.69586 | 20.15025 | 13.30334 | 27.96948 | 1.627024 | 1.91E-07 | 1.597411 | 5.37E-07 | -0.07709  | 0.933811 |
| ATS62880 | ARAC10   | 205.6804 | 235.5205 | 243.3667 | 352.2029 | 330.5712 | 343.9101 | 348.607  | 255.6969 | 354.3773 | 342.5542 | 395.1092 | 270.3716 | 0.57342  | 0.002119 | 0.47816  | 0.015417 | 0.54343   | 0.029174 |
| ATS62890 | NAT6     | 1091.414 | 80.40379 | 825.3864 | 762.5564 | 691.6158 | 786.5074 | 692.7674 | 759.5385 | 673.6097 | 821.3625 | 719.7107 | 782.1094 | -0.29839 | 0.044602 | -0.37305 | 0.012904 | -0.24499  | 0.288581 |
| ATS62900 | ATS62900 | 58.25629 | 55.31163 | 52.79383 | 159.6048 | 174.8914 | 147.5324 | 171.6356 | 126.2301 | 212.8216 | 71.96517 | 70.5077  | 54.90305 | 1.472619 | 1.52E-10 | 1.552282 | 2.1E-11  | 0.225474  | 0.654642 |
| ATS62910 | 250.8587 | 221.2465 | 224.0519 | 204.9705 | 222.589  | 253.1976 | 220.5473 | 261.0914 | 326.0662 | 216.8551 | 234.1388 | 218.5763 | 0.205764 | -0.04207 | 0.859828 | 0.205764 | 0.334932 | -0.05972  | 0.89034  |
| ATS62920 | ARR6     | 191.4135 | 230.1677 | 272.9827 | 83.72036 | 107.9822 | 61.80433 | 59.58333 | 35.60337 | 81.02842 | 92.6584  | 91.5681  | 267.2639 | -1.36957 | 2.27E-07 | -1.8594  | 4.89E-12 | 0.113565  | 0.856492 |
| ATS62930 | ATS62930 | 284.148  | 299.7533 | 346.379  | 307.2496 | 343.8205 | 315.9985 | 229.4403 | 291.3003 | 307.5175 | 269.6295 | 266.0668 | 265.1921 | 0.053967 | 0.79008  | -0.16784 | 0.380913 | -0.21283  | 0.44746  |
| ATS62940 | DOF5.6   | 72.52314 | 35.68492 | 43.78025 | 23.09527 | 30.47349 | 23.92418 | 36.46144 | 23.73558 | 19.52492 | 36.46235 | 69.17737 | 48.68761 | -0.90976 | 0.009986 | -0.8583  | 0.022164 | -0.01027  | 0.991988 |
| ATS62950 | ATS62950 | 134.3461 | 135.6027 | 137.779  | 203.7333 | 237.8258 | 153.5135 | 186.7537 | 124.0723 | 191.3442 | 130.4968 | 162.3007 | 116.2015 | 0.532314 | 0.023498 | 0.292562 | 0.279324 | -0.00265  | 0.99684  |
| ATS62960 | ATS62960 | 73.71204 | 33.90067 | 46.35556 | 24.74493 | 21.19895 | 26.9147  | 21.34328 | 20.49891 | 24.40615 | 62.36982 | 89.13238 | 66.29802 | -1.03941 | 0.000835 | -1.14688 | 0.000496 | -0.440989 | 0.383754 |
| ATS62970 | ATS62970 | 0        | 0        | 0        | 0        | 0        | 0        | 0.889303 | 0        | 0        | 0        | 0        | 0        | 0        | NA       | 0.160764 | NA       | 0.478922  | NA       |
| ATS62980 | FOLB2    | 130.7794 | 107.0548 | 110.7383 | 139.3965 | 190.1281 | 121.6146 | 173.4142 | 97.10009 | 192.3205 | 168.8783 | 191.5681 | 146.0628 | 0.352652 | 0.221575 | 0.388117 | 0.196418 | 0.506322  | 0.214516 |
| ATS62990 | emb1692  | 90.3567  | 85.64381 | 73.3963  | 95.68041 | 109.3071 | 106.662  | 122.7239 | 131.6246 | 160.1043 | 76.76285 | 86.47171 | 73.54936 | 0.305487 | 0.178019 | 0.712451 | 0.000698 | -0.07843  | 0.879636 |
| ATS62998 | ATS62998 | 0        | 0        | 0        | 0.412416 | 0        | 0        | 0.996841 | 0        | 0        | 0.976246 | 0        | 1.330334 | 0        | NA       | 0.236171 | NA       | 0.201591  | NA       |
| ATS63000 | ATS63000 | 79.65566 | 85.64381 | 86.27284 | 139.8089 | 117.9192 | 105.6651 | 94.26617 | 116.5201 | 129.8407 | 78.68192 | 73.16837 | 104.6266 | 0.527204 | 0.022543 | 0.421092 | 0.095543 | 0.033628  | 0.958517 |
| ATS63010 | ATS63010 | 52.31177 | 46.3904  | 61.80741 | 58.56301 | 50.34751 | 61.80413 | 80.03731 | 73.36452 | 64.43224 | 46.05771 | 42.57069 | 41.43626 | 0.070115 | 0.829241 | 0.415129 | 0.133895 | -0.2974   | 0.537149 |
| ATS63020 | ATS63020 | 357.8601 | 430.0033 | 337.3654 | 278.7929 | 220.6016 | 289.0838 | 295.2488 | 405.6626 | 256.5727 | 299.3751 | 297.9948 | 308.7001 | -0.49746 | 0.011652 | -0.2248  | 0.327258 | -0.30024  | 0.508185 |
| ATS63030 | GRX1C    | 153.3686 | 160.5821 | 178.984  | 406.2293 | 398.1428 | 313.008  | 314.8134 | 298.8525 | 592.5813 | 237.9648 | 203.5411 | 218.5763 | 1.132244 | 2.58E-06 | 1.23565  | 2.9E-07  | 0.401973  | 0.330556 |
| ATS63040 | ATS63040 | 185.469  | 162.3664 | 166.1074 | 94.85558 | 101.3575 | 103.6714 | 158.296  | 163.9913 | 92.60085 | 115.1464 | 147.6671 | 139.8474 | -0.7611  | 0.000301 | -0.28296 | 0.252391 | -0.34912  | 0.319028 |
| ATS63050 | EMB2759  | 342.4043 | 330.0855 | 318.0506 | 233.0148 | 247.1003 | 262.1691 | 292.5808 | 280.5114 | 257.7289 | 341.5947 | 297.9948 | 311.8079 | -0.41804 | 0.002324 | -0.25031 | 0.10379  | -0.05464  | 0.866158 |
| ATS63060 | ATS63060 | 149.8019 | 171.2876 | 203.4494 | 93.20592 | 101.3575 | 91.70935 | 124.5025 | 101.4157 | 124.9595 | 282.1035 | 255.4241 | 214.4327 | -0.85035 | 5.86E-06 | -0.56124 | 0.005455 | 0.510449  | 0.045306 |
| ATS63063 | ATS63063 | 0        | 0        | 0        | 0        | 0        | 0        | 0        | 0        | 0        | 0        | 0        | 0        | #N/A     | #N/A     | #N/A     | #N/A     | #N/A      | #N/A     |
| ATS63065 | ATS63065 | 0        | 0        | 0        | 0        | 0        | 0        | 0        | 0        | 0        | 0        | 0        | 0        | #N/A     | #N/A     | #N/A     | #N/A     | #N/A      | #N/A     |
| ATS63070 | RP515F   | 0        | 0        | 0        | 0        | 0.662467 | 0        | 1.07889  | 0        | 0        | 0        | 2.660668 | 0        | 0.081727 | NA       | 0.150165 | NA       | 0.348649  | NA       |
| ATS63080 | ATS63080 | 108.1903 | 137.3869 | 153.2309 | 206.2078 | 225.9013 | 182.4219 | 230.3296 | 174.7802 | 181.5818 | 132.4159 | 150.3277 | 169.8887 | 0.615414 | 0.002102 | 0.5485   | 0.00921  | 0.179872  | 0.653508 |
| ATS63085 | ATS63085 | 0        | 0        | 0        | 0        | 0        | 0        | 0        | 0        | 0        | 0        | 0        | 0        | #N/A     | #N/A     | #N/A     | #N/A     | #N/A      | #N/A     |
| ATS63087 | ATS63087 | 0        | 0        | 1.287654 | 0.824831 | 1.987402 | 0        | 1.778607 | 0        | 0        | 3.838143 | 0        | 2.071813 | 0.207981 | 0.771524 | 0.048916 | 0.950254 | 0.585128  | NA       |
| ATS63090 | LOB      | 22.58917 | 26.76369 | 28.3284  | 28.86909 | 25.17376 | 19.93682 | 14.22866 | 22.65669 | 15.61994 | 23.98839 | 18.62468 | 25.89766 | -0.02781 | 0.954131 | -0.51597 | 0.222531 | -0.14664  | 0.861927 |
| ATS63100 | ATS63100 | 64.20081 | 62.44861 | 69.53333 | 35.05532 | 36.4357  | 34.88943 | 31.42562 | 33.44559 | 59.55101 | 51.81492 | 46.56169 | 54.90305 | -0.83884 | 0.002534 | -0.62779 | 0.038062 | -0.33495  | 0.506472 |
| ATS63110 | HDA6     | 184.2801 | 189.1301 | 180.2716 | 234.6645 | 230.3775 | 189.3997 | 181.4179 | 168.3068 | 237.2278 | 168.8783 | 159.6401 | 166.781  | 0.186617 | 0.358748 | 0.084748 | 0.728169 | -0.15421  | 0.672254 |
| ATS63120 | RH30     | 184.2801 | 189.1301 | 158.3815 | 166.6159 | 160.3171 | 161.4882 | 170.7463 | 172.6224 | 123.9832 | 144.8899 | 141.0154 | 164.7091 | -0.11495 | 0.598874 | -0.17903 | 0.423361 | -0.22791  | 0.492249 |
| ATS63130 | ATS63130 | 8.322328 | 7.136984 | 10.30123 | 62.27475 | 57.63465 | 107.6588 | 60.47264 | 53.9445  | 88.83839 | 6.716749 | 11.97301 | 12.43088 | 2.696136 | 1.46E-12 | 2.555546 | 3.78E-11 | 0.14063   | 0.896184 |
| ATS63135 | ATS63135 | 60.6341  | 42.8219  | 57.94455 | 126.1992 | 105.3323 | 68.78201 | 57.80473 | 66.89118 | 118.2548 | 64.28889 | 41.24035 | 64.2262  | 0.834321 | 0.010421 | 0.532034 | 0.144121 | 0.063068  | 0.942392 |
| ATS63140 | PAP29    | 67.76752 | 48.17464 | 74.68395 | 45.77813 | 64.25933 | 44.85784 | 60.42985 | 53.9445  | 62.47974 | 58.53167 | 39.91002 | 63.1903  | -0.30023 | 0.322164 | -0.08845 | 0.815575 | -0.22854  | 0.676812 |
| ATS63145 | ATS63145 | 0        | 0        | 0        | 0        | 0        | 0        | 0        | 0        | 0        | 0        | 0        | 0        | #N/A     | #N/A     | #N/A     | #N/A     | #N/A      | #N/A     |
| ATS63150 | ATS63150 | 115.3237 | 139.1712 | 155.8062 | 210.3319 | 243.1255 | 166.4724 | 196.5361 | 156.439  | 233.3228 | 165.0401 | 183.5861 | 175.0682 | 0.585982 | 0.00628  | 0.530208 | 0.027136 | 0.340909  | 0.336936 |
| ATS63160 | BT1      | 323.3819 | 294.4006 | 303.8864 | 217.7554 | 235.8383 | 273.1344 | 496.2313 | 421.846  | 503.7429 | 427.9529 | 591.9986 | 360.4955 | -0.34248 | 0.09774  | 0.609333 | 0.001821 | 0.562614  | 0.026396 |
| ATS63168 | ATS63168 | 0        | 0        | 0        | 0        | 0        | 0        | 0        | 0        | 0        | 0        | 0        | 0        | #N/A     | #N/A     | #N/A     | #N/A     | #N/A      | #N/A     |
| ATS63170 | ATS63170 | 0        | 0        | 0        | 0        | 0        | 0        | 1.778607 | 1.07889  | 0        | 0        | 0        | 0        | 0        | NA       | 0.460477 | NA       | 0         | NA       |
| ATS63180 | ATS63180 | 725.2314 | 917.1025 | 888.4815 | 730.     |          |          |          |          |          |          |          |          |          |          |          |          |           |          |

|           |           |          |          |          |          |          |          |          |          |          |          |          |          |           |          |          |          |          |          |
|-----------|-----------|----------|----------|----------|----------|----------|----------|----------|----------|----------|----------|----------|----------|-----------|----------|----------|----------|----------|----------|
| ATSG63700 | ATSG63700 | 271.0701 | 264.0684 | 248.5173 | 193.4229 | 184.1659 | 161.4882 | 161.8532 | 149.9657 | 147.4131 | 248.5197 | 254.0938 | 284.8743 | -0.52085  | 0.000499 | -0.75662 | 7.44E-07 | 0.008121 | 0.98603  |
| ATSG63710 | ATSG63710 | 292.4704 | 280.1266 | 289.7222 | 174.8642 | 215.3019 | 227.2797 | 187.643  | 204.9891 | 201.1067 | 253.3174 | 212.8534 | 243.438  | -0.48745  | 0.002027 | -0.53178 | 0.001142 | -0.27337 | 0.290487 |
| ATSG63715 | MIR166G   | 0        | 0        | 0        | 0        | 0        | 0        | 0        | 0        | 0        | 0        | 0        | 0        | #N/A      | #N/A     | #N/A     | #N/A     | #N/A     | #N/A     |
| ATSG63720 | KPL       | 0        | 0        | 0        | 0        | 0        | 0        | 0        | 0        | 0        | 0.959536 | 0        | 0        | 0         | NA       | 0        | NA       | 0.171512 | NA       |
| ATSG63730 | ARI14     | 1.188904 | 0        | 0        | 0.412416 | 0.662467 | 0        | 0        | 0        | 0.976246 | 0        | 0        | 0        | -0.00662  | NA       | -0.04652 | NA       | -0.23374 | NA       |
| ATSG63740 | ATSG63740 | 0        | 1.784246 | 0        | 0        | 0        | 0        | 0        | 0        | 0        | 0        | 0        | 0        | -0.2184   | NA       | -0.20558 | NA       | -0.19918 | NA       |
| ATSG63750 | ARI13     | 1.188904 | 3.568492 | 3.862963 | 2.886909 | 1.987402 | 0.996841 | 3.557214 | 2.15778  | 0.976246 | 3.888143 | 3.991002 | 1.035907 | -0.23537  | 0.768178 | -0.16422 | 0.850854 | 0.041047 | NA       |
| ATSG63760 | ARI15     | 141.4796 | 119.5445 | 132.6284 | 158.3676 | 170.2541 | 147.5324 | 172.5249 | 165.0702 | 137.6507 | 117.0633 | 130.3727 | 96.33931 | 0.264735  | 0.192409 | 0.528735 | 0.235767 | -0.20445 | 0.574235 |
| ATSG63770 | DKG2      | 183.0912 | 196.2671 | 163.5321 | 197.1346 | 161.642  | 215.3176 | 202.7612 | 215.778  | 168.8906 | 153.5257 | 175.6041 | 156.4219 | 0.079376  | 0.729646 | 0.115107 | 0.626153 | -0.15673 | 0.667432 |
| ATSG63780 | SHA1      | 709.7757 | 815.4004 | 807.3593 | 398.8059 | 426.6289 | 429.6384 | 1517.152 | 1352.928 | 1260.334 | 1206.136 | 1249.184 | 1194.4   | -0.88593  | 1.18E-14 | 0.819737 | 2.77E-13 | 0.641877 | 6.86E-07 |
| ATSG63790 | NAC102    | 97.49012 | 144.5239 | 139.0667 | 438.8102 | 365.0195 | 475.4931 | 542.4751 | 554.5494 | 552.5552 | 84.43914 | 83.81104 | 123.2729 | 1.710898  | 1.6E-20  | 2.07132  | 1.01E-29 | -0.3582  | 0.304703 |
| ATSG63800 | BGAL6     | 2029.459 | 2440.849 | 2231.505 | 1245.907 | 1147.393 | 1285.925 | 1749.26  | 1640.992 | 1214.45  | 2076.435 | 2141.838 | 2127.752 | -0.85187  | 2.08E-09 | -0.53245 | 0.000373 | -0.07671 | 0.815889 |
| ATSG63810 | BGAL10    | 466.0503 | 533.4896 | 418.4877 | 291.9902 | 308.0473 | 413.6889 | 672.3134 | 679.7007 | 722.422  | 376.138  | 340.5655 | 440.2603 | -0.47994  | 0.006166 | 0.542165 | 0.001859 | -0.28201 | 0.319899 |
| ATSG63820 | ATSG63820 | 14.26685 | 5.352738 | 16.73951 | 8.248311 | 5.962205 | 8.971567 | 12.45025 | 8.63112  | 15.61994 | 14.39303 | 15.96401 | 10.35907 | -0.59444  | 0.248589 | -0.02311 | 0.972376 | 0.088766 | NA       |
| ATSG63830 | ATSG63830 | 59.4452  | 67.80135 | 50.21852 | 61.03751 | 72.8714  | 63.79781 | 60.47264 | 52.86561 | 75.17094 | 64.28889 | 53.21336 | 68.36983 | 0.158315  | 0.59432  | 0.097078 | 0.779488 | 0.083219 | 0.89041  |
| ATSG63840 | PSL5      | 758.5207 | 706.5614 | 646.4025 | 510.1581 | 459.0898 | 569.1961 | 518.4639 | 658.1229 | 439.3107 | 610.2647 | 516.1696 | 598.754  | -0.45029  | 0.009062 | -0.37999 | 0.037262 | -0.28446 | 0.303125 |
| ATSG63850 | AAP4      | 343.5932 | 347.928  | 333.5025 | 188.4739 | 162.9669 | 152.5166 | 176.9714 | 170.4646 | 163.0331 | 408.7622 | 340.5655 | 339.7773 | -0.99532  | 5.48E-12 | -0.98775 | 3.69E-11 | 0.090415 | 0.778443 |
| ATSG63860 | UVR8      | 856.0108 | 758.3046 | 710.7852 | 145.8578 | 767.1371 | 755.6053 | 808.3769 | 919.2142 | 1101.205 | 686.068  | 657.185  | 623.6157 | -0.07362  | 0.687035 | -0.27764 | 0.08256  | -0.23875 | 0.319262 |
| ATSG63870 | PP7       | 317.4374 | 369.3389 | 361.8309 | 376.9478 | 319.3092 | 285.0965 | 345.0498 | 306.4047 | 309.47   | 310.8895 | 349.8778 | 334.5978 | -0.08176  | 0.668991 | -0.11942 | 0.539614 | -0.07267 | 0.838414 |
| ATSG63880 | VP52.01   | 136.724  | 101.702  | 115.8889 | 303.1254 | 333.221  | 324.9701 | 353.0535 | 293.4581 | 446.1444 | 135.2945 | 180.9254 | 150.2064 | 1.386645  | 4.26E-13 | 1.569201 | 2.17E-16 | 0.364042 | 0.285592 |
| ATSG63890 | HISN8     | 593.2631 | 608.4279 | 629.663  | 453.6571 | 439.2158 | 453.6194 | 454.4341 | 496.2894 | 462.6195 | 447.6865 | 558.7403 | 615.3285 | -0.4571   | 9.59E-05 | -0.408   | 0.000857 | -0.0046  | 0.990203 |
| ATSG63900 | ATSG63900 | 0        | 0        | 0        | 0        | 1.324935 | 0        | 0.889303 | 1.07889  | 1.952492 | 0.995936 | 0        | 1.035907 | 0.194598  | NA       | 0.636946 | NA       | 0.394189 | NA       |
| ATSG63905 | ATSG63905 | 21.40027 | 19.62671 | 29.61605 | 41.65397 | 52.33491 | 38.87679 | 32.01493 | 28.05114 | 93.71962 | 18.23118 | 21.28534 | 37.29264 | 0.78041   | 0.080362 | 0.96462  | 0.032334 | 0.092025 | 0.93419  |
| ATSG63910 | FLCY      | 260.37   | 246.226  | 267.8321 | 227.6534 | 237.1633 | 288.087  | 231.2189 | 244.908  | 227.4653 | 200.5429 | 251.4331 | 281.7656 | -0.05052  | 0.821609 | -0.13855 | 0.519176 | -0.08097 | 0.837597 |
| ATSG63920 | TOP3A     | 64.20081 | 44.60615 | 57.94445 | 64.74925 | 51.00988 | 59.81045 | 51.5796  | 40.99782 | 21.47741 | 74.84378 | 63.85603 | 46.61769 | 0.061449  | 0.88018  | -0.51801 | 0.144348 | -0.31208 | 0.853923 |
| ATSG63930 | ATSG63930 | 111.757  | 105.2705 | 104.3    | 75.05963 | 61.60946 | 96.69356 | 101.3806 | 131.6246 | 76.14719 | 111.3061 | 107.7571 | 81.83662 | -0.45716  | 0.083881 | -0.05771 | 0.871211 | -0.09319 | 0.875031 |
| ATSG63940 | ATSG63940 | 227.0807 | 214.1095 | 216.3259 | 202.9085 | 194.7654 | 229.2734 | 200.0933 | 201.7524 | 158.1519 | 222.6123 | 178.2648 | 155.386  | -0.07319  | 0.75229  | -0.22807 | 0.827628 | -0.23389 | 0.474799 |
| ATSG63941 | ATSG63941 | 0        | 0        | 0        | 0        | 0        | 0        | 0        | 0        | 0        | 0        | 0        | 0        | #N/A      | #N/A     | #N/A     | #N/A     | #N/A     | #N/A     |
| ATSG63950 | CHR24     | 149.8019 | 94.56504 | 122.3272 | 94.03075 | 103.3449 | 116.6304 | 117.3881 | 120.8357 | 99.57709 | 103.6298 | 102.4357 | 142.9551 | -0.24169  | 0.335123 | -0.12974 | 0.657257 | -0.08044 | 0.879636 |
| ATSG63952 | ATSG63952 | 0        | 0        | 0        | 0        | 0        | 0        | 0        | 0        | 0        | 0        | 0        | 0        | #N/A      | #N/A     | #N/A     | #N/A     | #N/A     | #N/A     |
| ATSG63960 | POLD1     | 116.5126 | 92.78079 | 115.8889 | 99.80457 | 90.75802 | 138.5609 | 102.2699 | 97.10009 | 39.04984 | 117.0633 | 113.0784 | 110.842  | 0.002762  | 0.994993 | -0.42551 | 0.210905 | 0.059558 | 0.937332 |
| ATSG63970 | ATSG63970 | 55.87849 | 30.3218  | 48.93086 | 113.8267 | 100.0326 | 93.70303 | 150.2923 | 198.5157 | 130.817  | 76.76285 | 63.85603 | 42.47217 | 1.095788  | 5.57E-05 | 1.701997 | 9.5E-11  | 0.378264 | 0.458727 |
| ATSG63980 | SAL1      | 663.4084 | 574.5272 | 656.6264 | 642.9559 | 655.1801 | 728.9606 | 751.3231 | 751.9863 | 908.885  | 822.322  | 661.176  | 795.5762 | 0.095742  | 0.592752 | 0.322211 | 0.042218 | 0.266956 | 0.254721 |
| ATSG63990 | SAL3      | 29.7226  | 46.3904  | 38.26563 | 125.3743 | 129.8436 | 95.69671 | 70.25498 | 79.83786 | 70.07593 | 40.3005  | 42.57069 | 37.29264 | 1.58186   | 5.41E-11 | 0.968383 | 0.000217 | 0.077926 | 0.109197 |
| ATSG64000 | SAL2      | 80.84547 | 96.34929 | 110.7383 | 390.5575 | 339.1832 | 333.9417 | 287.245  | 279.4325 | 221.6078 | 60.45074 | 66.5167  | 61.11849 | 1.849311  | 2.26E-25 | 1.419588 | 1.04E-14 | -0.59227 | 0.408055 |
| ATSG64010 | ATSG64010 | 33.28931 | 46.3904  | 51.50617 | 74.2348  | 66.24673 | 61.80413 | 44.46517 | 53.9445  | 47.83605 | 44.13864 | 38.57969 | 62.15439 | 0.615041  | 0.028005 | 0.152215 | 0.682127 | 0.15246  | 0.860773 |
| ATSG64020 | TBL14     | 135.535  | 208.7568 | 175.121  | 236.7265 | 206.0273 | 222.2965 | 208.9828 | 186.463  | 142.0113 | 145.0064 | 158.4939 | 0.367222 | 0.047582  | 0.227502 | 0.282103 | -0.20068 | 0.566159 |          |
| ATSG64030 | ATSG64030 | 841.744  | 685.1505 | 659.279  | 440.8722 | 452.4651 | 515.3667 | 520.2425 | 567.4961 | 570.1277 | 694.7038 | 876.6901 | 645.3698 | -0.62856  | 5.42E-05 | -0.39467 | 0.018954 | 0.015386 | 0.97255  |
| ATSG64040 | PSAN      | 19829.73 | 26344.39 | 27573.83 | 13551.56 | 13044.64 | 10359.17 | 13673.04 | 11326.19 | 15740.99 | 33707.53 | 37989.02 | 30698.05 | -0.87525  | 1.24E-08 | -0.83772 | 1.47E-06 | 0.463476 | 0.611513 |
| ATSG64050 | ATER5     | 669.3529 | 587.0169 | 620.6494 | 539.0272 | 511.4247 | 573.1834 | 544.2537 | 603.0995 | 645.2986 | 567.0856 | 465.6169 | 612.2108 | -0.21031  | 0.170913 | -0.0683  | 0.718557 | -0.18682 | 0.545485 |
| ATSG64060 | anacl03   | 20.21137 | 8.92123  | 16.73951 | 279.2053 | 346.4704 | 314.0083 | 267.6803 | 245.9869 | 205.0117 | 11.51443 | 14.63367 | 17.61004 | -4.033895 | 6.83E-52 | 0.365468 | 4.69E-42 | -0.14265 | 0.863358 |
| ATSG64070 | PIAKB1    | 917.8338 | 886.7703 | 731.3877 | 551.3996 | 556.4725 | 668.8802 | 666.9776 | 879.2953 | 589.6526 | 663.9987 | 504.1966 | 732.3859 | -0.50229  | 0.010727 | -0.24195 | 0.28344  | -0.40324 | 0.167689 |
| ATSG64080 | ATSG64080 | 172.3911 | 144.5239 | 123.6148 | 98.99774 | 130.5061 | 74.76306 | 75.5908  | 51.78672 | 100.5533 | 133.3755 | 109.0874 | 142.9551 | -0.50226  | 0.071049 | -0.90063 | 0.000964 | -0.18132 | 0.740609 |
| ATSG64090 | ATSG64090 | 209.2741 | 151.6609 | 169.9704 | 129.0861 | 168.9292 | 139.5577 | 147.6244 | 178.0168 | 164.9856 | 121.861  | 131.7031 | 154.3501 | -0.12208  | 0.632025 | -0.12208 | 0.632025 | -0.3791  | 0.224653 |
| ATSG64100 | PER69     | 0        | 0        | 0        | 0.262078 | 3.31236  | 3.987363 | 2.66791  | 1.07889  | 0        | 1.330334 | 1.035907 | 1.243685 | 0.042343  | 0.576893 | 0.407699 | 0.33571  | NA       | NA       |
| ATSG64110 | PER70     | 13.07794 | 16.05821 | 16.73951 | 81.24587 | 56.97219 | 96.69356 | 40.02609 | 40.02609 | 6.767285 | 7.982004 | 3.10772  | 1.40944  | 0.000113  | 1.40944  | 0.000113 | -0.10143 | 0.110083 | 0.110083 |
| ATSG64120 | PER71     | 54.68958 | 57.09587 | 69.53333 | 258.997  | 241.8006 | 241.2355 | 240.1119 | 262.1703 | 255.7765 | 45.09817 | 65.18636 | 26.93357 | 1.966033  | 1.74E-21 | 1.992169 | 1.06E-21 | -0.41289 | 0.317823 |
| ATSG64130 | ATSG64130 | 381.6382 | 481.7464 | 467.4185 | 722.1397 | 716.1271 | 669.877  | 573.6007 | 631.1506 | 667.8827 | 490.3227 | 480.2506 | 547.9946 | 0.65407   | 0.000139 | 0.628785 | 0.000341 | 0.189803 | 0.561641 |
| ATSG64140 | RP528C    | 399.4177 | 369.3389 | 401.7482 | 673.4746 | 695.5906 | 418.6731 | 315.7027 | 310.7203 | 642.3699 | 530.3804 | 783.5667 | 529.3484 | 0.579364  | 0.047398 | 0.108965 | 0.777398 | 0.622043 | 0.131376 |
| ATSG64150 | ATSG64150 | 67.76752 | 51.74313 | 104.3    | 94.03075 | 101.3575 | 66.78833 | 79.14801 | 90.62675 | 89.81463 | 47.97678 | 54.54369 | 67.33392 | 0.214793  | 0.496826 | 0.186574 | 0.588736 | -0.39212 | 0.414825 |
| ATSG64160 | ATSG64160 | 135.535  | 180.2088 | 199.5864 | 286.2164 | 280.2237 | 298.0554 | 231.2189 | 236.2769 | 292.8738 | 198.6239 | 250.4388 | 127.4165 | 0.52565   | 0.00082  | 0.54625  | 0.018531 | 0.08791  | 0.866179 |
| ATSG64170 |           |          |          |          |          |          |          |          |          |          |          |          |          |           |          |          |          |          |          |

|           |           |          |          |          |          |          |          |          |          |           |          |          |          |          |          |          |           |          |          |
|-----------|-----------|----------|----------|----------|----------|----------|----------|----------|----------|-----------|----------|----------|----------|----------|----------|----------|-----------|----------|----------|
| ATSG64610 | HAM1      | 259.1811 | 249.7944 | 242.079  | 366.6374 | 349.7827 | 338.9259 | 311.2562 | 334.4559 | 276.2776  | 238.9244 | 251.4331 | 311.8079 | 0.48513  | 0.001573 | 0.289361 | 0.093469  | 0.09355  | 0.782883 |
| ATSG64620 | C/VIF2    | 256.8033 | 219.4623 | 184.1346 | 162.9042 | 129.8436 | 135.7053 | 162.7425 | 133.7824 | 194.273   | 192.8673 | 286.0218 | 199.93   | -0.59987 | 0.006981 | -0.41371 | 0.088673  | 0.031197 | 0.958526 |
| ATSG64630 | FAS2      | 87.97889 | 62.44861 | 97.86173 | 72.58514 | 54.98478 | 62.80097 | 51.5796  | 49.62894 | 41.97858  | 96.9131  | 97.11438 | 99.44703 | -0.77752 | 0.130644 | -0.77752 | 0.001904  | 0.216526 | 0.625212 |
| ATSG64640 | PME64     | 108.1903 | 71.36984 | 56.65679 | 28.45667 | 23.84882 | 22.92734 | 35.57214 | 34.52448 | 38.07359  | 79.64146 | 91.79304 | 60.08258 | -1.54182 | 4.31E-08 | -1.06843 | 0.000301  | -0.40467 | 0.957917 |
| ATSG64650 | ATSG64650 | 65.38972 | 78.50683 | 91.42346 | 133.2102 | 153.6924 | 125.6019 | 101.3806 | 103.5734 | 96.64835  | 105.5489 | 83.81104 | 101.5188 | 0.793463 | 9.32E-05 | 0.348176 | 1.150862  | 0.360696 | 0.410963 |
| ATSG64660 | PUB27     | 36.85602 | 46.3904  | 35.06475 | 135.6247 | 155.6798 | 205.3492 | 225.8831 | 213.6202 | 272.3743  | 374.2189 | 63.85603 | 42.47217 | 0.736498 | 9.25E-14 | 2.368688 | 1.006E-22 | 0.132535 | 0.837937 |
| ATSG64667 | IDL2      | 8.322328 | 5.352738 | 14.1642  | 16.90904 | 17.22415 | 11.96209 | 7.982338 | 15.10446 | 23.4299   | 18.23118 | 18.62468 | 7.251346 | 0.574146 | 0.272904 | 0.606706 | 0.293836  | 0.490032 | NA       |
| ATSG64670 | ATSG64670 | 191.4135 | 214.1095 | 219.9102 | 297.3516 | 280.2237 | 220.3016 | 98.86234 | 195.2791 | 235.2573  | 219.7337 | 234.1388 | 270.3716 | 0.35745  | 0.502628 | -0.0166  | 0.957303  | 0.211573 | 0.523736 |
| ATSG64680 | ATSG64680 | 87.97889 | 98.13353 | 101.7247 | 137.3344 | 166.2793 | 125.6019 | 116.4988 | 110.0468 | 132.7695  | 124.7396 | 123.7211 | 105.6625 | 0.568693 | 0.004709 | 0.314182 | 0.178143  | 0.291286 | 0.411386 |
| ATSG64685 | ATSG64685 | 5.94452  | 7.136984 | 7.725926 | 3.71174  | 3.974804 | 0.996841 | 7.114428 | 2.15778  | 5.857476  | 10.55489 | 13.30334 | 8.287252 | -0.83542 | 0.16185  | -0.31114 | 0.665473  | 0.504001 | NA       |
| ATSG64690 | ATSG64690 | 2.377808 | 7.136984 | 11.58889 | 1.649662 | 0.662467 | 3.987363 | 3.557214 | 2.15778  | 8.786214  | 5.959536 | 2.660668 | 6.215439 | -1.13345 | 0.072058 | -0.34237 | 0.657389  | -0.08737 | NA       |
| ATSG64700 | ATSG64700 | 20.21137 | 12.48972 | 11.58889 | 4.536571 | 8.612075 | 2.990522 | 10.67164 | 14.02557 | 7.809968  | 5.995356 | 9.312338 | 9.323159 | -1.18308 | 0.01585  | -0.3904  | 0.505344  | -0.5513  | NA       |
| ATSG64710 | ATSG64710 | 41.61164 | 24.97944 | 24.46543 | 26.80701 | 31.79843 | 26.9147  | 22.23259 | 21.5778  | 33.19236  | 20.70514 | 26.60668 | 47.6517  | -0.10241 | 0.820895 | -0.23871 | 0.598174  | 0.179417 | 0.815889 |
| ATSG64720 | EC1.5     | 0        | 0        | 0        | 0.412416 | 0.662467 | 0        | 0        | 0        | 0         | 0        | 0        | 0        | 0.196313 | NA       | 0        | NA        | 0        | NA       |
| ATSG64730 | ATSG64730 | 82.03437 | 71.36984 | 83.69753 | 113.4143 | 113.9444 | 87.72199 | 81.81592 | 101.4157 | 120.0783  | 92.11542 | 97.11438 | 89.08796 | 0.40128  | 0.08665  | 0.33161  | 0.198557  | 0.212003 | 0.626543 |
| ATSG64735 | ATSG64735 | 0        | 0        | 0        | 0        | 0        | 0        | 0        | 0        | 0         | 0        | 0        | 0        | #N/A     | #N/A     | #N/A     | #N/A      | #N/A     | #N/A     |
| ATSG64740 | CE5A6     | 2728.535 | 2253.503 | 2025.48  | 786.0641 | 717.4521 | 1153.345 | 858.1779 | 1046.523 | 814.1892  | 1872.054 | 1842.513 | 1707.174 | -1.36789 | 3.93E-14 | -1.33271 | 2.27E-13  | -0.36145 | 0.226173 |
| ATSG64750 | ABR1      | 3.566712 | 1.784246 | 1.287654 | 7.835896 | 5.962205 | 6.977885 | 12.45025 | 9.710009 | 1.952492  | 0.959536 | 2.660668 | 2.071813 | 1.002061 | 0.11311  | 1.144971 | 0.077759  | -0.17066 | NA       |
| ATSG64760 | RPNS5     | 160.502  | 173.0719 | 195.7235 | 233.0148 | 267.6368 | 256.1881 | 250.7836 | 214.6991 | 413.5082  | 212.0574 | 232.8084 | 208.2172 | 0.499615 | 0.016645 | 0.197438 | 0.443236  | 0.292233 | 0.409287 |
| ATSG64770 | RGF9      | 954.6899 | 1366.732 | 1357.188 | 1034.856 | 1627.686 | 949.9893 | 1256.132 | 833.9819 | 1381.388  | 1470.968 | 2333.406 | 1251.375 | 0.121262 | 0.723673 | -0.18437 | 0.817647  | 0.436029 | 0.318066 |
| ATSG64780 | ATSG64780 | 23.77808 | 41.03766 | 29.61605 | 57.73818 | 60.28452 | 56.81992 | 61.36194 | 36.68226 | 38.07359  | 17.27164 | 21.28534 | 37.29264 | 0.853414 | 0.010789 | 0.517988 | 0.176029  | -0.25878 | 0.719598 |
| ATSG64790 | ATSG64790 | 1.188904 | 1.784246 | 0        | 7.835896 | 10.59948 | 7.974726 | 11.44248 | 4.31556  | 5.857476  | 0        | 0        | 1.035907 | 1.862412 | 0.001733 | 1.342804 | 0.037728  | -0.34414 | NA       |
| ATSG64800 | CLE21     | 17.83356 | 24.97944 | 16.73951 | 45.36571 | 45.04777 | 26.9147  | 47.13308 | 34.52448 | 41.97858  | 41.26003 | 33.25835 | 18.64632 | 0.921807 | 0.012372 | 0.970566 | 0.010978  | 0.590772 | 0.336105 |
| ATSG64810 | WRKY51    | 7.133424 | 1.784246 | 6.438272 | 350.5532 | 382.2436 | 302.0428 | 46.24378 | 30.20892 | 49.78855  | 0        | 6.65167  | 3.10772  | 5.3821   | 1.18E-52 | 2.425194 | 2.09E-10  | -0.56499 | 0.528712 |
| ATSG64813 | LIP1      | 388.7716 | 363.9862 | 446.8161 | 454.0695 | 430.6037 | 481.4741 | 440.2052 | 496.2894 | 316.3037  | 450.0222 | 401.7609 | 388.4649 | 0.180218 | 0.372593 | 0.057967 | 0.815165  | 0.04554  | 0.919161 |
| ATSG64816 | ATSG64816 | 115.3237 | 119.5445 | 132.6284 | 160.4297 | 200.0651 | 125.6019 | 134.2848 | 113.2834 | 327.0424  | 148.728  | 196.8894 | 137.7756 | 0.374249 | 0.311297 | 0.595746 | 0.10015   | 0.361119 | 0.551392 |
| ATSG64820 | ATSG64820 | 0        | 0        | 0        | 0        | 1.324935 | 0        | 1.07889  | 0        | 0.959536  | 0        | 0        | 0        | 0.2019   | NA       | 0.149615 | NA        | 0.145187 | NA       |
| ATSG64830 | ATSG64830 | 145.0463 | 194.4828 | 193.1482 | 215.6933 | 210.6646 | 225.286  | 192.9789 | 175.8591 | 202.0829  | 174.6355 | 210.1928 | 233.079  | 0.291112 | 0.124671 | 0.106852 | 0.649417  | 0.215186 | 0.509225 |
| ATSG64840 | ABC5      | 5025.497 | 5600.748 | 5202.124 | 2413.044 | 2204.029 | 2540.947 | 2976.499 | 2891.425 | 1938.825  | 5815.745 | 6279.176 | 5352.529 | -1.12427 | 4.24E-13 | -1.00109 | 1.63E-10  | 0.138124 | 0.667773 |
| ATSG64850 | ATSG64850 | 196.1692 | 224.815  | 229.2975 | 242.5004 | 227.2263 | 118.3081 | 185.8644 | 141.3346 | 176.7005  | 262.9128 | 304.6465 | 304.5565 | -0.04803 | 0.842823 | -0.48684 | 0.013443  | 0.28515  | 0.356429 |
| ATSG64855 | ATSG64855 | 0        | 0        | 1.287654 | 0.412416 | 0        | 0.996841 | 0        | 0        | 0         | 0        | 1.330334 | 0        | 0.016131 | NA       | -0.25461 | NA        | -0.01817 | NA       |
| ATSG64860 | DPE1      | 363.8046 | 458.5512 | 500.8975 | 353.8526 | 294.7979 | 370.8248 | 532.6928 | 571.8117 | 508.6242  | 504.7157 | 481.5809 | 550.0664 | -0.36943 | 0.024    | 0.283331 | 0.105196  | 0.215505 | 0.432844 |
| ATSG64870 | FLOT3     | 24.96698 | 28.54794 | 14.1642  | 52.37678 | 54.98478 | 94.69987 | 133.3955 | 155.3602 | 122.3007  | 15.35257 | 9.312338 | 19.68222 | 1.438723 | 9.74E-06 | 2.435788 | 4.55E-15  | -0.48991 | 0.46317  |
| ATSG64880 | ATSG64880 | 175.9578 | 169.5034 | 213.7506 | 302.7123 | 327.2588 | 299.0522 | 288.1343 | 245.9869 | 331.9236  | 266.7509 | 385.7969 | 203.0377 | 0.704362 | 0.001658 | 0.606572 | 0.0097    | 0.582838 | 0.063368 |
| ATSG64890 | PEP2      | 0        | 0        | 0        | 3.71174  | 3.312336 | 4.984204 | 1.778607 | 2.15778  | 5.857476  | 0.959536 | 0        | 0        | 1.472552 | 0.017805 | 1.247286 | 0.05601   | 0.105117 | NA       |
| ATSG64900 | PEP1      | 2.377808 | 8.92123  | 6.438272 | 10.31039 | 10.59948 | 8.971567 | 9.782338 | 6.47334  | 10.73871  | 6.716749 | 9.312338 | 6.215439 | 0.646652 | 0.021207 | 0.514479 | 0.414347  | 0.267158 | NA       |
| ATSG64905 | PEP3      | 0        | 0        | 0        | 7.835896 | 14.57428 | 8.971567 | 6.225124 | 4.31556  | 13.66744  | 0.959536 | 0        | 1.035907 | 2.366124 | 5.27E-05 | 2.36681  | 0.000806  | 0.211303 | NA       |
| ATSG64910 | ATSG64910 | 16.64466 | 21.41095 | 25.75309 | 23.50769 | 23.84882 | 10.96525 | 14.22886 | 10.7889  | 16.59618  | 37.42189 | 21.28534 | 41.43626 | -0.07203 | 0.892995 | -0.52654 | 0.273836  | 0.606789 | 0.347323 |
| ATSG64920 | CIP8      | 514.7954 | 620.9176 | 561.4173 | 498.1498 | 504.1376 | 508.3888 | 441.0945 | 450.976  | 671.6572  | 559.4093 | 639.8906 | 479.6247 | -0.16209 | 0.454558 | -0.11314 | 0.367742  | -0.01463 | 0.978296 |
| ATSG64930 | CPR5      | 203.3026 | 240.8732 | 221.4765 | 211.1568 | 193.4404 | 211.3302 | 193.8682 | 181.2535 | 142.3191  | 193.8262 | 199.5501 | 204.0736 | -0.10381 | 0.600646 | -0.34891 | 0.055503  | -0.1473  | 0.651245 |
| ATSG64940 | ATATH13   | 5107.531 | 4774.642 | 4685.774 | 1866.593 | 1813.173 | 1896.988 | 1181.884 | 1093.994 | 780.9968  | 4681.574 | 4718.695 | 4643.969 | -1.36633 | 2.82E-24 | -2.2203  | 7.67E-62  | -0.05217 | 0.878472 |
| ATSG64950 | ATSG64950 | 32.10041 | 26.76369 | 28.3284  | 42.4788  | 50.34751 | 34.88943 | 40.01866 | 39.91893 | 44.90732  | 26.867   | 39.91002 | 27.96948 | 0.518155 | 0.107453 | 0.472892 | 0.178692  | 0.079827 | 0.920768 |
| ATSG64960 | CDK2      | 559.9738 | 579.88   | 513.7741 | 456.9655 | 425.9665 | 542.2814 | 561.1505 | 537.2872 | 365.116   | 580.5191 | 602.6413 | 484.8043 | -0.21153 | 0.305195 | -0.17105 | 0.447921  | 0.012332 | 0.982685 |
| ATSG64970 | ATSG64970 | 26.15589 | 23.1952  | 33.47901 | 34.23049 | 27.16116 | 33.89259 | 28.45771 | 32.3667  | 47.83605  | 55.65307 | 45.23135 | 36.25673 | 0.169372 | 0.677892 | 0.34434  | 0.389459  | 0.663877 | 0.186713 |
| ATSG64980 | ATSG64980 | 15.45575 | 28.54794 | 24.46543 | 31.34358 | 27.82363 | 23.92418 | 24.01119 | 28.05114 | 16.59618  | 35.50282 | 17.29434 | 36.2573  | 0.292409 | 0.499786 | 0.022065 | 0.908790  | 0.387665 | 0.578718 |
| ATSG64990 | RABH1A    | 2.377808 | 10.70548 | 6.438272 | 14.84696 | 15.89921 | 17.94313 | 14.22886 | 11.86779 | 16.786214 | 3.838143 | 6.65167  | 6.215439 | 1.14275  | 0.021926 | 0.72747  | 0.205566  | -0.13094 | NA       |
| ATSG65000 | ATSG65000 | 110.5681 | 89.2123  | 109.4506 | 226.0037 | 203.3775 | 210.3334 | 249.005  | 221.1724 | 310.4462  | 127.6182 | 126.3817 | 121.2011 | 1.013157 | 2.39E-08 | 1.293087 | 6.71E-13  | 0.257161 | 0.468427 |
| ATSG65005 | ATSG65005 | 0        | 0        | 0        | 0        | 0        | 0        | 0        | 0        | 0         | 0        | 0        | 0        | #N/A     | #N/A     | #N/A     | #N/A      | #N/A     | #N/A     |
| ATSG65010 | ASN2      | 1072.391 | 974.1983 | 991.4938 | 600.8895 | 674.3917 | 703.7696 | 763.0224 | 845.8497 | 870.8114  | 725.4089 | 703.7467 | 872.2333 | -0.61557 | 1.37E-06 | -0.29121 | 0.039948  | -0.39593 | 0.022518 |
| ATSG65015 | ATSG65015 | 0        | 0        | 0        | 0        | 0        | 0        | 0        | 0        | 0         | 0        | 0        | 0        | #N/A     | #N/A     | #N/A     | #N/A      | #N/A     | #N/A     |
| ATSG65020 | ANN2      | 501.7175 | 626.2704 | 593.6087 | 691.2085 | 607.4825 | 653.9276 | 620.7338 | 620.3617 | 825.9041  | 737.8829 | 815.4947 | 637.0825 | 0.181667 | 0.331768 | 0.261739 | 0.        |          |          |

|           |           |          |          |          |          |          |          |          |          |          |           |          |          |           |          |          |          |           |          |
|-----------|-----------|----------|----------|----------|----------|----------|----------|----------|----------|----------|-----------|----------|----------|-----------|----------|----------|----------|-----------|----------|
| ATSG65500 | ATSG65500 | 2.377808 | 1.784246 | 0        | 2.474493 | 6.624673 | 2.990522 | 0        | 4.31556  | 3.904984 | 0         | 0        | 1.035907 | 0.77865   | 0.255847 | 0.41124  | 0.599307 | -0.45494  | NA       |
| ATSG65510 | AHL7      | 17.83356 | 8.92123  | 19.31482 | 11.96005 | 11.92441 | 7.974726 | 7.982338 | 12.94668 | 6.833722 | 16.31211  | 19.95501 | 22.78994 | -0.46477  | 0.336283 | -0.58324 | 0.25769  | 0.282389  | NA       |
| ATSG65520 | ATSG65520 | 58.25629 | 55.31163 | 15.36914 | 58.1506  | 77.50867 | 45.85468 | 52.46891 | 57.18117 | 62.89091 | 57.57214  | 63.85603 | 49.72351 | 0.107128  | 0.762928 | 0.176662 | 0.625917 | 0.010399  | 0.990348 |
| ATSG65530 | ATSG65530 | 22.58917 | 32.11643 | 23.17778 | 18.14629 | 15.23675 | 11.96209 | 12.45025 | 20.49891 | 18.54867 | 37.42189  | 45.23135 | 25.89766 | -0.65043  | 0.096865 | -0.52431 | 0.228952 | 0.454947  | 0.473751 |
| ATSG65533 | ATSG65533 | 0        | 0        | 0        | 0        | 0        | 0        | 0        | 0        | 0        | 0         | 0        | 0        | #N/A      | #N/A     | #N/A     | #N/A     | #N/A      | #N/A     |
| ATSG65535 | ATSG65535 | 0        | 0        | 0        | 0        | 0        | 0        | 0        | 0        | 0        | 0         | 0        | 0        | #N/A      | #N/A     | #N/A     | #N/A     | #N/A      | #N/A     |
| ATSG65540 | ATSG65540 | 166.4466 | 158.7979 | 159.6691 | 156.3055 | 145.7428 | 171.4566 | 220.5473 | 167.2279 | 120.0783 | 138.1731  | 123.7211 | 155.386  | -0.03746  | 0.900887 | 0.06644  | 0.829279 | -0.20715  | 0.62574  |
| ATSG65550 | UG91B1    | 4.755616 | 0        | 6.438272 | 2.062078 | 3.974804 | 0        | 4.446517 | 0        | 4.31556  | 2.928738  | 2.878607 | 1.330334 | -0.51022  | 0.48134  | 0.001234 | 0.998927 | -0.36861  | NA       |
| ATSG65560 | ATSG65560 | 126.0238 | 96.34929 | 101.7247 | 81.24587 | 88.77061 | 106.662  | 92.48756 | 110.0468 | 91.76712 | 115.1443  | 123.7211 | 104.6266 | -0.24985  | 0.27871  | -0.14829 | 0.579005 | 0.068073  | 0.891692 |
| ATSG65570 | PCMP-H47  | 26.15589 | 26.76369 | 24.46543 | 21.03319 | 17.88662 | 20.93366 | 35.57214 | 33.44559 | 28.11311 | 23.98839  | 17.29434 | 31.0772  | -0.3397   | 0.382985 | 0.312871 | 0.447948 | -0.06859  | 0.939955 |
| ATSG65575 | ATSG65575 | 45.17835 | 53.52738 | 38.62693 | 58.56301 | 78.83361 | 37.87995 | 50.6903  | 33.44559 | 81.02842 | 43.1791   | 69.17737 | 53.86714 | 0.341512  | 0.388803 | 0.25361  | 0.564434 | 0.249763  | 0.727223 |
| ATSG65580 | ATSG65580 | 0        | 0        | 0        | 0        | 0        | 0        | 0        | 0        | 0        | 0         | 0        | 0        | 0         | NA       | 0        | NA       | 0.677431  | NA       |
| ATSG65590 | DOF5.7    | 27.34479 | 39.25341 | 28.3284  | 31.756   | 23.84882 | 26.9147  | 28.45771 | 22.65669 | 41.97858 | 40.3005   | 47.89202 | 31.0772  | -0.1554   | 0.710817 | -0.00176 | 0.997118 | 0.31693   | 0.617081 |
| ATSG65600 | LECRK92   | 4.755616 | 5.352738 | 3.862693 | 29.28151 | 23.18635 | 32.89575 | 68.47637 | 58.26006 | 44.90732 | 4.797678  | 2.660668 | 1.035907 | 2.120095  | 1.01E-06 | 0.376593 | 2.18E-13 | -0.43647  | 0.676856 |
| ATSG65609 | ATSG65609 | 1.188904 | 0        | 0        | 1.649662 | 3.312336 | 2.990522 | 1.778607 | 2.15778  | 2.928738 | 2.878607  | 0        | 1.035907 | 0.843642  | 0.20825  | 0.719399 | 0.313594 | 0.384628  | NA       |
| ATSG65610 | ATSG65610 | 89.1678  | 89.2123  | 78.54691 | 76.7093  | 92.74542 | 88.71883 | 72.03358 | 43.1556  | 81.02842 | 91.15588  | 105.0964 | 92.19568 | 0.002149  | 0.995089 | -0.36306 | 0.19506  | 0.158787  | 0.751803 |
| ATSG65615 | ATSG65615 | 0        | 0        | 0        | 0        | 0        | 0        | 0        | 0        | 0        | 0         | 0        | 0        | #N/A      | #N/A     | #N/A     | #N/A     | #N/A      | #N/A     |
| ATSG65620 | OOP       | 1433.818 | 1382.791 | 1243.874 | 905.6646 | 753.2253 | 1061.635 | 1054.714 | 1186.779 | 829.8091 | 1193.662  | 1134.775 | 1099.097 | -0.56867  | 0.000636 | -0.39553 | 0.026372 | -0.23966  | 0.401991 |
| ATSG65630 | GT7       | 848.8774 | 772.5785 | 788.0445 | 834.7291 | 873.1319 | 1085.56  | 1164.098 | 1595.678 | 1564.922 | 622.7386  | 622.5963 | 688.8778 | -0.205894 | 0.251746 | 0.828164 | 9.02E-08 | -0.31192  | 0.218266 |
| ATSG65640 | BHLH93    | 171.2022 | 181.9931 | 180.2716 | 101.0418 | 134.4809 | 98.68724 | 105.8271 | 106.8101 | 115.197  | 190.9476  | 226.1568 | 198.8941 | -0.65639  | 0.000276 | -0.68385 | 0.000292 | 0.201668  | 0.543675 |
| ATSG65650 | ATSG65650 | 102.2457 | 78.50683 | 87.5605  | 127.4364 | 105.9948 | 121.6146 | 110.2736 | 110.0468 | 126.912  | 89.23661  | 101.1054 | 92.19568 | 0.383492  | 0.067601 | 0.348867 | 0.125152 | 0.054121  | 0.917881 |
| ATSG65660 | ATSG65660 | 140.2907 | 142.7397 | 114.6012 | 230.5403 | 233.1885 | 226.8289 | 270.3748 | 312.8781 | 312.8781 | 376.831   | 51.16066 | 147.6671 | 0.181632  | 8.03E-06 | 0.274909 | 1.95E-13 | 0.208742  | 0.546872 |
| ATSG65670 | IAA9      | 214.0207 | 2157.153 | 2181.286 | 2793.291 | 2956.591 | 2652.593 | 2253.495 | 2320.692 | 2810.612 | 2098.504  | 2156.471 | 1979.617 | 0.372258  | 0.001318 | 0.187183 | 0.153386 | -0.05516  | 0.836577 |
| ATSG65676 | ATSG65676 | 0        | 0        | 0        | 0        | 0        | 0        | 0        | 0        | 0        | 0         | 0        | 0        | 0         | NA       | 0        | NA       | 0.248756  | NA       |
| ATSG65683 | ATSG65683 | 170.0133 | 130.25   | 136.4914 | 71.34789 | 61.60946 | 65.79149 | 67.69776 | 83.07453 | 70.28971 | 138.1731  | 167.6221 | 162.6373 | -1.10694  | 8.4E-09  | -0.97379 | 1.38E-06 | 0.087017  | 0.84833  |
| ATSG65685 | ATSG65685 | 492.2062 | 460.3355 | 533.0889 | 402.93   | 408.7423 | 374.8121 | 564.7077 | 493.0527 | 401.2371 | 548.8544  | 496.2146 | 566.6049 | -0.31982  | 0.04377  | -0.02694 | 0.901599 | 0.115134  | 0.70827  |
| ATSG65687 | ATSG65687 | 131.9683 | 135.6027 | 124.9025 | 153.831  | 142.4305 | 161.4882 | 181.4179 | 154.2813 | 153.2944 | 153.5257  | 126.3817 | 106.6984 | 0.216345  | 0.03596  | 0.31136  | 0.146101 | -0.01574  | 0.987198 |
| ATSG65690 | PKC2      | 1.188904 | 0        | 0        | 0.824831 | 0.662467 | 0        | 0        | 1.07889  | 0.976246 | 1.919071  | 0        | 0        | 0.04306   | NA       | 0.10977  | NA       | 0.115436  | NA       |
| ATSG65670 | BAM1      | 945.1786 | 490.6677 | 517.637  | 286.6288 | 256.3748 | 332.9448 | 363.7251 | 380.8481 | 359.2585 | 514.3111  | 536.1246 | 448.5475 | -1.12286  | 2.99E-07 | -0.7987  | 0.000482 | -0.37315  | 0.311054 |
| ATSG65710 | HSL2      | 129.5905 | 110.6233 | 133.9161 | 65.08852 | 63.96866 | 77.75358 | 91.59826 | 105.7312 | 81.02842 | 140.0922  | 126.3817 | 114.9856 | -0.92799  | 5.49E-06 | -0.4242  | 0.064356 | 0.021968  | 0.970574 |
| ATSG65720 | NIFS1     | 839.3662 | 653.034  | 592.321  | 504.3842 | 471.0142 | 498.4204 | 417.9726 | 485.5005 | 633.5837 | 514.3111  | 530.8033 | 501.3788 | -0.4912   | 0.066909 | -0.43242 | 0.203335 | -0.42366  | 0.10302  |
| ATSG65730 | XTH6      | 2218.495 | 2704.917 | 2396.325 | 752.246  | 632.6562 | 956.9671 | 637.6306 | 781.1163 | 862.0252 | 2946.734  | 2941.368 | 2655.028 | -1.61335  | 9.69E-24 | -1.64812 | 1.55E-24 | 0.219438  | 0.469967 |
| ATSG65740 | ATSG65740 | 116.5126 | 130.25   | 131.3007 | 121.2502 | 110.632  | 123.6083 | 157.4067 | 117.599  | 103.4821 | 180.3927  | 180.9254 | 152.2783 | -0.08528  | 0.740736 | 0.00882  | 0.976543 | -0.332258 | 0.185263 |
| ATSG65750 | ATSG65750 | 504.0953 | 449.643  | 430.0766 | 516.3443 | 544.5481 | 614.0539 | 661.6148 | 717.4618 | 611.13   | 381.8952  | 319.2802 | 412.2908 | 0.266225  | 0.086946 | 0.519419 | 0.000675 | 0.402654  | 0.918229 |
| ATSG65760 | ATSG65760 | 291.2815 | 299.7533 | 296.1605 | 270.1322 | 277.5738 | 271.1407 | 298.806  | 332.2981 | 316.3037 | 258.1151  | 311.2981 | 285.9102 | -0.11346  | 0.476548 | 0.093281 | 0.592618 | -0.05613  | 0.862386 |
| ATSG65770 | CRWN4     | 0        | 0        | 0        | 0.412416 | 0        | 0.996841 | 0        | 0        | 0        | 0         | 0        | 0        | 0.224618  | NA       | 0.015914 | 0.996268 | 0.181562  | 0.528954 |
| ATSG65780 | BCAT5     | 344.7821 | 347.928  | 372.1321 | 367.4623 | 357.0699 | 351.8848 | 430.4229 | 336.6137 | 295.8025 | 410.6812  | 379.1452 | 419.5421 | 0.015914  | 0.943044 | -0.00107 | 0.996268 | 0.181562  | 0.528954 |
| ATSG65790 | ATMYB88   | 2.377808 | 1.784246 | 1.287654 | 11.13522 | 9.274542 | 0.987363 | 4.446517 | 8.63112  | 7.862214 | 1.919071  | 3.991002 | 2.071813 | 1.374735  | 0.021574 | 1.169816 | 0.06801  | 0.183235  | NA       |
| ATSG65800 | AC561     | 3.566712 | 1.784246 | 1.505617 | 0.412416 | 0        | 0.996841 | 0        | 0        | 0.976246 | 0.995936  | 3.991002 | 5.179533 | -1.26532  | 0.049646 | -1.22503 | 0.064057 | -0.03636  | NA       |
| ATSG65810 | ATSG65810 | 250.8587 | 249.7944 | 298.7358 | 264.7708 | 274.9239 | 253.1976 | 189.4216 | 195.2791 | 155.2321 | 267.7104  | 234.1388 | 261.0484 | -0.01189  | 0.955877 | -0.55974 | 0.000507 | -0.06538  | 0.858201 |
| ATSG65820 | ATSG65820 | 64.20081 | 51.74313 | 61.80741 | 25.15735 | 33.12336 | 30.90206 | 47.13308 | 34.52448 | 25.3824  | 57.57214  | 51.88302 | 58.01077 | -0.69776  | 0.000536 | -0.69286 | 0.022749 | -0.08598  | 0.897222 |
| ATSG65830 | ATRLP57   | 74.90095 | 71.36984 | 75.97161 | 48.25262 | 62.93439 | 44.85784 | 56.91542 | 48.55005 | 40.02609 | 86.35821  | 94.45371 | 70.44164 | -0.48773  | 0.058203 | -0.58308 | 0.032258 | 0.163634  | 0.748719 |
| ATSG65840 | ATSG65840 | 505.2842 | 579.88   | 563.9926 | 156.7395 | 412.7171 | 347.8974 | 425.0871 | 420.7671 | 507.6419 | 673.594   | 578.6953 | 679.5547 | -0.55069  | 9.56E-05 | -0.27855 | 0.078331 | 0.229857  | 0.325102 |
| ATSG65850 | ATSG65850 | 13.07794 | 14.27397 | 15.45185 | 12.37427 | 12.58688 | 15.94945 | 15.11876 | 15.58223 | 7.862214 | 10.215025 | 15.96401 | 16.5745  | -0.07625  | 0.989392 | -0.36079 | 0.507251 | 0.27441   | NA       |
| ATSG65860 | ATSG65860 | 153.3686 | 128.4657 | 160.9568 | 104.6736 | 137.1307 | 103.6714 | 105.3843 | 76.60119 | 104.7483 | 156.4043  | 158.3097 | 167.8169 | -0.35482  | 0.090869 | -0.59246 | 0.005956 | 0.113891  | 0.794433 |
| ATSG65870 | PKS5      | 30.9115  | 26.76369 | 25.75309 | 69.69823 | 81.48347 | 53.8294  | 85.37313 | 62.57562 | 92.74337 | 38.38143  | 83.81104 | 37.29264 | 1.184211  | 0.000661 | 1.394704 | 2.71E-05 | 0.81336   | 0.101014 |
| ATSG65880 | ATSG65880 | 45.17835 | 64.23286 | 42.49259 | 52.78919 | 72.20893 | 48.8452  | 26.6791  | 31.28781 | 50.76479 | 63.32935  | 83.81104 | 50.75942 | 0.204017  | 0.582859 | -0.43174 | 0.245226 | 0.365581  | 0.156594 |
| ATSG65890 | ACR1      | 191.4135 | 174.8561 | 155.8062 | 105.5784 | 74.8588  | 88.71883 | 79.14801 | 89.54786 | 97.4646  | 157.3638  | 154.3187 | 157.4578 | -0.92048  | 8.85E-07 | -0.92048 | 1.19E-06 | -0.15033  | 0.697022 |
| ATSG65900 | RH27      | 309.115  | 237.3047 | 199.5864 | 190.1236 | 196.0903 | 190.3966 | 152.9602 | 190.9635 | 280.1826 | 197.6643  | 231.4781 | 239.2944 | -0.36103  | 0.145226 | -0.25172 | 0.361444 | -0.1565   | 0.743976 |
| ATSG65910 | ATSG65910 | 593.2613 | 676.2292 | 695.3333 | 613.0959 | 865.8447 | 796.4758 | 838.6132 | 787.5897 | 805.4209 | 695.6633  | 686.4523 | 725.1349 | 0.333866  | 0.002854 | 0.307748 | 0.008438 | 0.102878  | 0.637513 |
| ATSG65920 | PUB31     | 72.52314 | 66.0171  | 68.24568 | 96.02983 | 120.569  | 133.5767 | 161.8532 | 168.3068 | 202.0829 | 55.65307  | 69.17737 | 77.69299 | 0.712448  | 0.001646 | 0.712448 | 9.44E-10 | -0.0394   | 0.951828 |
| ATSG65930 | ATSG65930 | 21.40027 | 24.97944 |          |          |          |          |          |          |          |           |          |          |           |          |          |          |           |          |



|           |           |          |          |          |          |          |          |          |          |          |          |          |           |           |          |          |           |          |          |
|-----------|-----------|----------|----------|----------|----------|----------|----------|----------|----------|----------|----------|----------|-----------|-----------|----------|----------|-----------|----------|----------|
| ATSG66400 | RAB18     | 66.57862 | 87.42806 | 65.67037 | 48.66504 | 40.4105  | 48.8452  | 58.69403 | 67.97007 | 72.2422  | 100.7512 | 69.17737 | 90.12387  | -0.62946  | 0.011724 | -0.12386 | 0.702957  | 0.262527 | 0.556808 |
| ATSG66410 | PLP38     | 170.0133 | 194.4828 | 261.3938 | 216.1058 | 247.7628 | 186.4092 | 165.4104 | 143.4924 | 258.7052 | 202.462  | 234.1388 | 239.2944  | 0.055149  | 0.862021 | -0.13549 | 0.665976  | 0.104709 | 0.850111 |
| ATSG66420 | ATSG66420 | 655.0861 | 474.6094 | 459.6926 | 269.7198 | 227.8877 | 287.0901 | 256.1194 | 325.8248 | 234.299  | 444.265  | 431.0282 | 507.5942  | -0.99911  | 3.1E-08  | -0.94318 | 2.97E-07  | -0.19827 | 0.568048 |
| ATSG66430 | ATSG66430 | 0        | 0        | 0        | 0        | 0        | 0        | 0        | 0        | 0        | 0        | 0        | 0         | #N/A      | #N/A     | #N/A     | #N/A      | #N/A     | #N/A     |
| ATSG66440 | ATSG66440 | 90.3567  | 66.0171  | 74.68395 | 134.0351 | 129.1811 | 122.6114 | 93.37687 | 128.3879 | 145.4607 | 82.52006 | 95.78405 | 85.98024  | 0.705177  | 0.001454 | 0.627305 | 0.007386  | 0.166441 | 0.72657  |
| ATSG66450 | LPPE2     | 78.46766 | 132.0342 | 103.0123 | 107.228  | 93.40789 | 118.6241 | 116.6241 | 136.3674 | 111.1257 | 106.4108 | 91.15588 | 81.79304  | 0.04014   | 0.894945 | 0.190892 | 0.492206  | -0.2332  | 0.591221 |
| ATSG66455 | ATSG66455 | 42.80054 | 41.03766 | 46.35556 | 43.30364 | 54.32232 | 41.86731 | 38.24005 | 42.07671 | 45.88356 | 45.09817 | 49.22236 | 41.443626 | 0.09282   | 0.788076 | -0.04941 | 0.90081   | 0.047432 | 0.949285 |
| ATSG66460 | MAN7      | 111.757  | 67.80135 | 101.7247 | 73.82329 | 62.93439 | 73.76622 | 62.25124 | 66.89118 | 43.93107 | 83.8796  | 78.4897  | 84.93264  | -0.42125  | 0.090678 | -0.69269 | 0.006628  | -0.19749 | 0.679803 |
| ATSG66470 | ATSG66470 | 581.374  | 562.0375 | 603.9099 | 471.3646 | 418.0168 | 420.6668 | 473.9988 | 520.025  | 575.9851 | 677.4322 | 693.104  | 717.8832  | -0.47383  | 4.67E-05 | -0.15531 | 0.264028  | 0.253467 | 0.153196 |
| ATSG66480 | ATSG66480 | 30.9115  | 58.88012 | 39.91728 | 75.47205 | 64.25933 | 60.80729 | 103.1592 | 90.62675 | 75.17094 | 50.85539 | 34.58868 | 48.68761  | 0.639033  | 0.024428 | 1.034978 | 0.000167  | 0.090622 | 0.896393 |
| ATSG66490 | ATSG66490 | 63.01191 | 89.2123  | 75.97161 | 138.5716 | 129.8436 | 102.6746 | 132.5062 | 105.7312 | 266.5152 | 65.24842 | 49.22236 | 74.58527  | 0.665733  | 0.042001 | 1.077506 | 0.000652  | -0.23715 | 0.719389 |
| ATSG66500 | PCMP-E38  | 16.64466 | 28.54794 | 18.02716 | 25.56977 | 23.18635 | 18.93997 | 29.34701 | 34.52448 | 27.33489 | 21.10978 | 10.64267 | 22.78994  | 0.142758  | 0.760361 | 0.513434 | 0.222534  | -0.13011 | 0.886051 |
| ATSG66510 | GAMMACA3  | 450.5946 | 483.5307 | 521.5    | 518.8188 | 573.6967 | 490.4457 | 440.2052 | 481.1849 | 693.1347 | 455.7794 | 363.1812 | 578.0358  | 0.118397  | 0.642806 | 0.145203 | 0.581472  | -0.05506 | 0.915569 |
| ATSG66520 | PCMP-H61  | 149.8019 | 157.0137 | 153.2309 | 67.63615 | 81.48347 | 80.7441  | 126.8121 | 130.5457 | 121.0545 | 213.9764 | 223.4961 | 208.2172  | -0.99504  | 0.29E-05 | -0.27654 | 0.159636  | 0.482389 | 0.030044 |
| ATSG66530 | ATSG66530 | 526.6844 | 624.4861 | 570.4309 | 432.6239 | 470.3518 | 435.6194 | 500.6779 | 554.5494 | 559.389  | 631.3744 | 659.8456 | 628.1617  | -0.35512  | 0.003516 | -0.08795 | 0.567204  | 0.155822 | 0.467042 |
| ATSG66535 | ATSG66535 | 0        | 0        | 0        | 0        | 0        | 0        | 0        | 0        | 0        | 0        | 0        | 0         | #N/A      | #N/A     | #N/A     | #N/A      | #N/A     | #N/A     |
| ATSG66540 | ATSG66540 | 267.5034 | 148.0924 | 244.6543 | 240.9705 | 258.3622 | 229.2734 | 216.99   | 179.0957 | 251.8715 | 175.595  | 208.8624 | 195.7863  | 0.052857  | 0.855172 | -0.03707 | 0.906084  | -0.19483 | 0.649871 |
| ATSG66550 | ATSG66550 | 54.68958 | 76.72258 | 59.2321  | 114.6515 | 118.5816 | 84.73147 | 67.58706 | 64.7334  | 98.60085 | 74.84378 | 54.54369 | 80.80071  | 0.7271987 | 0.005196 | 0.277997 | 0.387703  | 0.157976 | 0.784489 |
| ATSG66555 | ATSG66555 | 7.133424 | 1.784246 | 9.01358  | 9.073143 | 10.59948 | 8.971567 | 8.893053 | 4.31556  | 9.76246  | 3.881143 | 3.991002 | 8.275252  | 0.478168  | 0.432082 | 0.223033 | 0.598638  | -0.15807 | NA       |
| ATSG66560 | ATSG66560 | 3.566712 | 5.352738 | 9.01358  | 2.474493 | 4.637271 | 2.995522 | 1.778607 | 6.47334  | 3.904984 | 3.881143 | 5.321336 | 7.251346  | -0.58407  | 0.374852 | -0.40024 | 0.5858171 | -0.08502 | NA       |
| ATSG66565 | ATSG66565 | 0        | 0        | 0        | 0        | 0        | 0        | 0.996841 | 0        | 0        | 0        | 0        | 1.330334  | 0.136618  | NA       | 0        | NA        | 0.179947 | NA       |
| ATSG66566 | ATSG66566 | 0        | 0        | 0        | 0        | 0.824831 | 0        | 0.996841 | 1.778607 | 2.15778  | 0.976246 | 0        | 0         | 0.285597  | NA       | 0.796141 | NA        | 0.380692 | NA       |
| ATSG66567 | ATSG66567 | 0        | 0        | 0        | 0.412416 | 0.662467 | 0        | 0        | 0        | 0        | 0        | 0        | 1.330334  | 0.213241  | NA       | 0        | NA        | 0.204858 | NA       |
| ATSG66568 | ATSG66568 | 0        | 0        | 0        | 0        | 0        | 0        | 0        | 0        | 0        | 0        | 0        | 0         | #N/A      | #N/A     | #N/A     | #N/A      | #N/A     | #N/A     |
| ATSG66570 | PSB01     | 3822.207 | 41860.2  | 39265.73 | 19719.65 | 19377.17 | 17559.35 | 19715.86 | 21379.28 | 25832.45 | 43792.25 | 47423.75 | 37668.67  | -1.06138  | 1.4E-16  | -0.8241  | 2.68E-10  | 0.109542 | 0.687252 |
| ATSG66580 | ATSG66580 | 67.76752 | 101.702  | 101.7247 | 51.13953 | 49.02258 | 37.87995 | 19.56468 | 29.13003 | 40.02609 | 66.20796 | 87.80204 | 79.7648   | -0.8981   | 0.000094 | -1.51044 | 9.08E-08  | -0.19945 | 0.71872  |
| ATSG66590 | ATSG66590 | 135.535  | 183.7773 | 158.3815 | 83.30795 | 90.75802 | 57.81627 | 42.66857 | 50.70783 | 77.12343 | 165.9997 | 155.6491 | 165.745   | -0.97942  | 0.000201 | -1.41701 | 2.25E-09  | 0.038157 | 0.951396 |
| ATSG66600 | ATSG66600 | 43.98945 | 58.88012 | 52.79383 | 38.76706 | 43.06037 | 34.88943 | 43.57587 | 43.1556  | 30.26363 | 62.36982 | 57.20436 | 48.68761  | -0.37379  | 0.206665 | -0.37628 | 0.243319  | 0.122669 | 0.845408 |
| ATSG66607 | ATSG66607 | 1.188904 | 3.568492 | 2.575309 | 2.886909 | 1.987402 | 0        | 3.557214 | 4.31556  | 3.904984 | 7.676285 | 2.660668 | 4.143626  | -0.23824  | 0.763238 | 0.42011  | 0.589024  | 0.644368 | NA       |
| ATSG66610 | DAR7      | 53.00068 | 51.74313 | 69.53333 | 71.76031 | 87.44568 | 101.6778 | 72.03958 | 45.31338 | 48.8123  | 98.83217 | 81.15037 | 63.1903   | 0.529705  | 0.063888 | -0.06914 | 0.863336  | 0.447187 | 0.323724 |
| ATSG66620 | DAR6      | 42.80054 | 44.60615 | 45.0679  | 66.81132 | 64.92179 | 68.78201 | 62.25124 | 67.39009 | 57.14104 | 47.01725 | 39.91002 | 41.43626  | 0.569471  | 0.037675 | 0.569801 | 0.050245  | -0.03765 | 0.961209 |
| ATSG66630 | DAR5      | 86.78999 | 67.80135 | 64.38272 | 105.166  | 93.40789 | 99.68408 | 59.58333 | 65.81229 | 42.95482 | 44.13864 | 23.94601 | 46.6179   | 0.427143  | 0.112189 | -0.3704  | 0.225475  | -0.86376 | 0.015721 |
| ATSG66631 | ATSG66631 | 17.83356 | 23.1952  | 14.1642  | 16.08421 | 17.88662 | 21.9305  | 19.56468 | 22.65669 | 20.59117 | 17.27164 | 15.96401 | 18.64632  | 0.012213  | 0.981235 | 0.187368 | 0.711065  | -0.0516  | 0.961525 |
| ATSG66640 | DAR3      | 58.25629 | 103.4863 | 82.40988 | 231.3651 | 225.2389 | 256.1881 | 188.5323 | 158.9968 | 131.7932 | 28.77067 | 22.61568 | 32.1131   | 1.52032   | 1.26E-12 | 0.039876 | 2.51E-05  | -1.40721 | 2.65E-06 |
| ATSG66650 | ATSG66650 | 11.88904 | 14.27397 | 5.150617 | 8.660727 | 17.22415 | 20.93366 | 26.6791  | 19.42002 | 32.21612 | 9.595356 | 5.321336 | 12.43088  | 0.44898   | 0.400246 | 1.149432 | 0.017234  | -0.11731 | NA       |
| ATSG66658 | ATSG66658 | 8.322328 | 10.70548 | 10.30123 | 9.073143 | 13.91181 | 10.96525 | 8.893053 | 12.94668 | 7.32429  | 9.595356 | 11.97301 | 12.51346  | 0.165501  | 0.7873   | 0.52661  | 0.352134  | -0.02792 | NA       |
| ATSG66660 | ATSG66660 | 1.188904 | 10.70548 | 1.287544 | 0.824831 | 1.324935 | 0        | 2.66791  | 0        | 0.976246 | 0.995936 | 1.330334 | 1.025907  | -1.05507  | 0.107714 | -0.78889 | 0.3625351 | -0.85115 | NA       |
| ATSG66670 | ATSG66670 | 2.377808 | 0        | 1.287654 | 1.649662 | 1.987402 | 1.993682 | 0.889303 | 2.15778  | 0        | 1.919071 | 1.330334 | 0         | 0.237455  | 0.761296 | -0.1502  | 0.858534  | -0.10266 | NA       |
| ATSG66675 | ATSG66675 | 216.3805 | 248.0102 | 260.1062 | 396.3314 | 398.1428 | 476.4899 | 532.6298 | 558.865  | 402.2133 | 211.0978 | 292.6735 | 238.2585  | 0.790522  | 1.21E-05 | 0.102142 | 9.94E-09  | 0.029344 | 0.955279 |
| ATSG66680 | OST48     | 850.0663 | 672.6608 | 665.7173 | 986.0856 | 983.1014 | 1001.825 | 817.2699 | 772.4852 | 652.1323 | 631.3744 | 703.7467 | 678.5188  | 0.432409  | 0.002691 | 0.031662 | 0.857528  | -0.12253 | 0.657878 |
| ATSG66690 | UGT72E2   | 0        | 1.287654 | 4.949887 | 5.299738 | 4.984204 | 2.66791  | 2.15778  | 2.928738 | 0.995936 | 0        | 2.071813 | 0         | 1.499143  | 0.016678 | 0.805963 | 0.257292  | 0.222452 | NA       |
| ATSG66700 | ATHB-53   | 7.133424 | 7.136984 | 3.862963 | 3.71174  | 2.649869 | 4.984204 | 2.66791  | 2.15778  | 5.857476 | 2.878607 | 6.65167  | 10.35907  | -0.48438  | 0.471804 | -0.49951 | 0.486791  | 0.108724 | NA       |
| ATSG66710 | ATSG66710 | 2.377808 | 3.568492 | 1.287654 | 3.71174  | 3.974804 | 0.996841 | 3.557214 | 4.31556  | 0.976246 | 2.878607 | 7.982004 | 5.179533  | 0.189746  | 0.081472 | 0.157677 | 0.855548  | 0.689932 | NA       |
| ATSG66720 | ATSG66720 | 418.4942 | 524.5683 | 418.4877 | 367.0499 | 340.5082 | 330.9511 | 324.5958 | 379.7693 | 376.831  | 496.0979 | 395.1092 | 501.3788  | -0.37574  | 0.181924 | -0.32263 | 0.05766   | 0.04145  | 0.914827 |
| ATSG66730 | IDD1      | 456.5391 | 496.0204 | 483.9935 | 403.1494 | 390.1932 | 482.4709 | 446.303  | 518.9461 | 407.0946 | 372.2998 | 367.1722 | 417.4703  | -0.0891   | 0.622716 | -0.01292 | 0.952369  | -0.25346 | 0.297717 |
| ATSG66740 | ATSG66740 | 22.58917 | 26.76369 | 36.05432 | 5.361402 | 3.312336 | 0.996841 | 4.446517 | 2.15778  | 1.952492 | 36.46235 | 38.57969 | 46.61579  | -2.48516  | 3E-09    | -2.5862  | 1.22E-08  | 0.493147 | 0.454015 |
| ATSG66750 | DDM1      | 101.0568 | 87.42806 | 108.163  | 80.83345 | 67.57166 | 71.77254 | 58.69403 | 64.7334  | 43.93107 | 103.6298 | 115.7391 | 123.2729  | -0.41625  | 0.066556 | -0.80689 | 0.000444  | 0.192971 | 0.642323 |
| ATSG66755 | ATSG66755 | 0        | 0        | 0        | 0        | 0        | 0        | 0        | 0        | 0        | 0        | 0        | 0         | #N/A      | #N/A     | #N/A     | #N/A      | #N/A     | #N/A     |
| ATSG66760 | SDH1-1    | 691.9421 | 645.8971 | 621.937  | 799.6738 | 723.4143 | 863.2641 | 765.6903 | 817.7986 | 813.2129 | 643.8484 | 522.8213 | 616.3644  | 0.278542  | 0.037407 | 0.285985 | 0.039642  | -0.13241 | 0.591286 |
| ATSG66770 | SCL4      | 90.3567  | 71.36984 | 69.53333 | 57.32576 | 56.30972 | 58.81361 | 52.46891 | 70.12785 | 54.66978 | 55.65307 | 45.23135 | 49.72351  | -0.41726  | 0.093415 | -0.38304 | 0.159646  | -0.59333 | 0.094851 |
| ATSG66780 | ATSG66780 | 0        | 0        | 0        | 2.474493 | 0.662467 | 1.993682 | 3.557214 | 0        | 0.976246 | 0        | 1.330334 | 0         | 0.677318  | 0.201036 | 0.677539 | 0.282821  | 0.136333 | NA       |
| ATSG66790 | WAKL11    | 109.3792 | 121.3287 | 96.74008 | 124.9614 | 1        |          |          |          |          |          |          |           |           |          |          |           |          |          |

|          |          |          |          |          |          |          |          |          |          |          |          |          |          |          |          |          |          |          |          |
|----------|----------|----------|----------|----------|----------|----------|----------|----------|----------|----------|----------|----------|----------|----------|----------|----------|----------|----------|----------|
| ATS67270 | EB1C     | 92.73451 | 66.0171  | 93.99877 | 134.0351 | 131.831  | 103.6714 | 96.04478 | 98.17898 | 119.102  | 129.5373 | 162.3007 | 122.237  | 0.523376 | 0.019896 | 0.280405 | 0.285839 | 0.663953 | 0.022323 |
| ATS67280 | RLK      | 348.3489 | 296.1848 | 279.421  | 118.7757 | 111.2945 | 130.5861 | 120.056  | 110.0468 | 95.67211 | 268.67   | 220.8354 | 271.4075 | -1.33983 | 6.52E-17 | -1.47315 | 1.15E-18 | -0.27297 | 0.319156 |
| ATS67290 | ATS67290 | 194.9802 | 223.0308 | 187.9975 | 194.6602 | 198.7402 | 195.3808 | 211.6542 | 244.908  | 290.9213 | 248.5197 | 263.4061 | 191.6427 | -0.03567 | 0.885173 | 0.300525 | 0.143407 | 0.212943 | 0.524933 |
| ATS67300 | MYB44    | 608.7188 | 720.8354 | 667.0049 | 1377.468 | 1350.771 | 1709.582 | 1337.512 | 1783.405 | 2117.478 | 664.9582 | 615.9446 | 568.7127 | 1.127517 | 5.17E-11 | 1.362569 | 1.11E-15 | -0.1061  | 0.787687 |
| ATS67310 | CYP81G1  | 0        | 0        | 0        | 8.660727 | 7.949607 | 12.95893 | 13.33955 | 9.710009 | 10.73871 | 0.959536 | 0        | 1.035907 | 2.33567  | 4.68E-05 | 2.50154  | 1.51E-05 | 0.203988 | NA       |
| ATS67320 | HOS15    | 410.1719 | 381.8287 | 401.7482 | 456.544  | 465.052  | 460.5404 | 410.8582 | 408.8993 | 569.1514 | 331.9993 | 287.3521 | 369.8186 | 0.206061 | 0.260281 | 0.213151 | 0.267709 | -0.26455 | 0.337326 |
| ATS67330 | NRAMP4   | 395.905  | 378.2602 | 351.5296 | 355.5022 | 385.556  | 387.7711 | 309.4776 | 285.9058 | 333.8761 | 341.5947 | 397.7699 | 320.0951 | 0.001009 | 0.99624  | -0.27217 | 0.082708 | -0.09088 | 0.763178 |
| ATS67340 | PUB2     | 72.52314 | 82.07532 | 60.51975 | 299.8261 | 307.3848 | 351.8848 | 272.1269 | 283.7481 | 206.9642 | 34.54328 | 39.91002 | 52.83123 | 2.10182  | 3.5E-26  | 1.779981 | 1.81E-18 | -0.70551 | 0.034852 |
| ATS67350 | ATS67350 | 92.73451 | 83.85956 | 86.27284 | 84.13278 | 96.05775 | 68.78201 | 75.5908  | 73.36452 | 70.28971 | 80.60099 | 89.13238 | 76.65708 | -0.06718 | 0.80844  | -0.25705 | 0.324309 | -0.09952 | 0.844841 |
| ATS67360 | SBT1.7   | 1127.081 | 847.5169 | 820.2358 | 537.7899 | 436.5659 | 601.095  | 529.1356 | 662.4384 | 580.8664 | 621.7791 | 538.7853 | 646.4057 | -0.81344 | 2.09E-06 | -0.6459  | 0.000278 | -0.6164  | 0.005165 |
| ATS67370 | ATS67370 | 366.1824 | 424.6506 | 404.3235 | 335.7063 | 281.5486 | 221.2987 | 287.245  | 293.4581 | 292.8738 | 465.3748 | 409.7429 | 438.1885 | -0.48667 | 0.003575 | -0.44111 | 0.011786 | 0.138224 | 0.671635 |
| ATS67380 | CKA1     | 476.7505 | 447.8458 | 508.6235 | 492.8366 | 501.4877 | 497.4235 | 469.5522 | 540.5239 | 425.6433 | 413.5599 | 371.1632 | 460.9784 | 0.054504 | 0.762329 | -0.00116 | 0.995565 | -0.19913 | 0.416253 |
| ATS67385 | ATS67385 | 1408.851 | 1561.215 | 1442.173 | 560.4728 | 520.0368 | 687.8201 | 716.7786 | 718.5407 | 406.1183 | 1518.945 | 1470.019 | 1454.413 | -1.28545 | 1.06E-11 | -1.22623 | 1.26E-10 | 0.010544 | 0.986206 |
| ATS67390 | ATS67390 | 209.2471 | 219.4623 | 240.7914 | 190.9484 | 261.0121 | 162.485  | 170.7463 | 121.9146 | 138.6269 | 349.271  | 458.9652 | 307.6642 | -0.11621 | 0.675957 | -0.60886 | 0.010223 | 0.710765 | 0.011605 |
| ATS67400 | PER73    | 0        | 0        | 0        | 0.824831 | 0.662467 | 0        | 0.889303 | 0        | 0.976246 | 0.959536 | 0        | 1.035907 | 0.295371 | NA       | 0.338587 | NA       | 0.366772 | NA       |
| ATS67410 | ATS67410 | 11.88904 | 10.70548 | 7.725926 | 20.62078 | 23.84882 | 23.92418 | 25.7898  | 26.97225 | 26.35864 | 22.06932 | 18.62468 | 25.89766 | 0.993391 | 0.013171 | 1.196631 | 0.003314 | 0.975944 | 0.091364 |
| ATS67411 | SCL16    | 7.133424 | 1.784246 | 6.438272 | 1.649662 | 1.987402 | 0.996841 | 2.66791  | 1.07889  | 1.952492 | 1.919071 | 1.330334 | 3.10772  | -1.04662 | 0.109233 | -0.87678 | 0.213044 | -0.79171 | NA       |
| ATS67420 | LBD37    | 820.3437 | 1027.726 | 864.0161 | 1019.079 | 918.8421 | 965.9387 | 695.4353 | 686.174  | 760.4956 | 702.3801 | 742.3264 | 596.6822 | 0.101852 | 0.527704 | -0.33248 | 0.021496 | -0.40261 | 0.025933 |
| ATS67430 | ATS67430 | 0        | 0        | 1.287654 | 0.412416 | 1.987402 | 0        | 0        | 0        | 0        | 0.959536 | 0        | 0        | 0.206311 | NA       | -0.24641 | NA       | -0.05058 | NA       |
| ATS67440 | NPY3     | 203.3026 | 181.9931 | 162.2444 | 145.9951 | 143.0929 | 151.5198 | 184.9751 | 159.6757 | 164.9856 | 182.3118 | 183.5861 | 218.5763 | -0.31205 | 0.080363 | -0.10101 | 0.649786 | 0.092325 | 0.804111 |
| ATS67450 | AZF1     | 11.88904 | 8.92123  | 12.87654 | 49.48987 | 55.64725 | 39.87363 | 17.78607 | 16.18335 | 16.59618 | 7.676285 | 6.65167  | 4.143626 | 1.918546 | 1.93E-07 | 0.479779 | 0.326816 | -0.70213 | 0.356644 |
| ATS67455 | ATS67455 | 0        | 0        | 0        | 0        | 0        | 0        | 0        | 0        | 0        | 0        | 0        | 0        | #N/A     | #N/A     | #N/A     | #N/A     | #N/A     | #N/A     |
| ATS67460 | ATS67460 | 77.27876 | 32.11643 | 42.49259 | 22.27044 | 20.53649 | 19.93682 | 24.01119 | 22.65669 | 20.50117 | 53.734   | 51.88302 | 47.6517  | -1.20079 | 0.000167 | -1.11093 | 0.001031 | -0.01331 | 0.988816 |
| ATS67470 | FH6      | 272.259  | 157.0137 | 202.1617 | 188.4739 | 189.4656 | 194.384  | 157.4067 | 176.938  | 165.9618 | 151.6066 | 206.2018 | 187.4991 | -0.15145 | 0.527296 | -0.3404  | 0.137956 | -0.22359 | 0.55429  |
| ATS67480 | BT4      | 367.3713 | 440.7088 | 468.7062 | 1323.442 | 1350.771 | 1748.459 | 2390.448 | 2827.771 | 3005.861 | 505.6753 | 605.302  | 517.9533 | 1.757751 | 8.81E-30 | 2.639304 | 8.75E-67 | 0.342923 | 0.190631 |
| ATS67488 | ATS67488 | 0        | 0        | 0        | 0.412416 | 0        | 0        | 0.889303 | 2.15778  | 0        | 1.919071 | 1.330334 | 0        | 0.012221 | NA       | 0.494155 | NA       | 0.522789 | NA       |
| ATS67490 | ATS67490 | 20.21137 | 12.48972 | 21.89012 | 44.54088 | 48.36011 | 28.90838 | 36.46144 | 25.89336 | 83.95716 | 24.94793 | 23.94601 | 17.61041 | 0.99155  | 0.019867 | 1.216842 | 0.004395 | 0.209123 | 0.831384 |
| ATS67500 | VDAC2    | 766.843  | 524.5683 | 531.8012 | 538.6147 | 569.7219 | 537.2972 | 635.852  | 608.4939 | 692.1584 | 582.4381 | 782.2364 | 599.7899 | -0.14841 | 0.480579 | 0.081653 | 0.733205 | 0.099223 | 0.796296 |
| ATS67510 | RPL26B   | 212.8138 | 206.9725 | 236.9284 | 377.7727 | 309.3722 | 247.2165 | 180.5286 | 204.9891 | 382.6884 | 221.6527 | 224.8264 | 236.1867 | 0.489521 | 0.071839 | 0.214228 | 0.504999 | 0.051977 | 0.938531 |
| ATS67520 | APK4     | 87.97889 | 87.42806 | 79.83457 | 67.22374 | 80.15854 | 67.78517 | 53.35821 | 36.68226 | 32.21612 | 61.41028 | 89.13238 | 64.2262  | -0.23368 | 0.406128 | -1.00065 | 0.000124 | -0.25018 | 0.595754 |
| ATS67530 | CYP65    | 311.4928 | 299.7533 | 271.6951 | 293.2275 | 312.0221 | 313.008  | 323.7065 | 310.7203 | 333.8761 | 321.4444 | 272.7185 | 310.772  | 0.053121 | 0.762107 | 0.132339 | 0.431627 | 0.03987  | 0.90649  |
| ATS67540 | ATS67540 | 139.1018 | 126.6815 | 145.5049 | 222.292  | 204.7024 | 218.3081 | 192.9789 | 195.2791 | 179.6293 | 133.3755 | 131.7031 | 126.3806 | 0.633794 | 4.61E-05 | 0.450142 | 0.008119 | -0.07717 | 0.845503 |
| ATS67550 | ATS67550 | 5.94452  | 8.92123  | 14.1642  | 4.536571 | 5.962205 | 5.981045 | 8.003731 | 3.23667  | 5.857476 | 12.47396 | 10.64267 | 7.251346 | -0.66101 | 0.244721 | -0.56703 | 0.365657 | 0.064084 | NA       |
| ATS67560 | ATARLA1D | 645.5748 | 674.445  | 712.0729 | 545.2134 | 647.2305 | 519.354  | 503.3458 | 491.9738 | 741.947  | 644.8079 | 643.8816 | 746.8886 | -0.24136 | 0.219866 | -0.22106 | 0.291216 | 0.002976 | 0.995545 |
| ATS67570 | DG1      | 271.0701 | 223.0308 | 226.6272 | 186.8243 | 196.0903 | 203.3555 | 263.2338 | 278.3536 | 191.3442 | 292.6584 | 297.9948 | 242.4021 | -0.29919 | 0.126265 | 0.018641 | 0.943732 | 0.19869  | 0.555713 |
| ATS67580 | TR82     | 227.0807 | 233.7362 | 239.5037 | 339.418  | 342.4956 | 268.1502 | 328.153  | 306.4047 | 275.3014 | 217.8146 | 266.0668 | 272.4434 | 0.43945  | 0.008704 | 0.371502 | 0.037864 | 0.105898 | 0.768141 |
| ATS67590 | FRO1     | 538.5735 | 752.9518 | 779.0309 | 1065.682 | 1120.895 | 887.1883 | 763.9117 | 744.4341 | 904.98   | 800.2527 | 815.4947 | 683.6983 | 0.562655 | 0.001103 | 0.218981 | 0.280717 | 0.150015 | 0.657308 |
| ATS67600 | ATS67600 | 131.9683 | 115.976  | 131.3407 | 275.906  | 264.9869 | 183.4187 | 196.5361 | 185.5691 | 378.7834 | 149.6876 | 190.2378 | 225.8276 | 0.883605 | 0.001537 | 0.946337 | 0.000798 | 0.539204 | 0.217892 |
| ATS67610 | ATS67610 | 238.9697 | 199.8356 | 185.4222 | 200.8464 | 218.6142 | 211.3302 | 214.3221 | 217.9358 | 177.6768 | 225.4909 | 240.7904 | 223.7558 | 0.007947 | 0.971635 | -0.03777 | 0.872319 | 0.135573 | 0.677971 |
| ATS67620 | ATS67620 | 5.94452  | 3.568492 | 2.575309 | 8.660727 | 3.312336 | 1.993682 | 5.335821 | 6.47334  | 8.786214 | 7.676285 | 13.30334 | 4.143626 | 0.163857 | 0.829523 | 0.487105 | 0.494625 | 0.676447 | NA       |
| ATS67630 | ATS67630 | 203.3026 | 160.5821 | 146.7926 | 218.9927 | 215.9643 | 246.2197 | 184.9751 | 209.3046 | 237.2278 | 147.7685 | 176.9344 | 126.3806 | 0.396834 | 0.0457   | 0.292419 | 0.183665 | -0.18653 | 0.621592 |
| ATS67640 | ATS67640 | 22.58917 | 26.76369 | 27.04074 | 46.60296 | 54.98478 | 42.86415 | 53.35821 | 37.76115 | 63.45599 | 38.38143 | 29.26735 | 43.50807 | 0.861401 | 0.006314 | 0.952797 | 0.003271 | 0.510215 | 0.340957 |
