# Supplementary material
Source: PubMed Central journal article supplement (PMC5488868)
Supplement: NIHMS863237-supplement-Supp_TableS5.pdf [file NIHMS863237-supplement-Supp_TableS5.pdf]

Table S5: Expression of UGT glycosyltransferases with in vitro activity against benzoates. UGT-glycosyltransferases with suggested activity against dihydroxybenzoates were selected for rapid comparison. Log2-fold change and corrected p value for each enzyme in each genotype are shown; highlighted in green are glycosyltransferases which are significantly upregulated in *ceh1* and *ceh1/eds16*.

|         |            | <i>ceh1</i> |          |         |      | <i>ceh1/eds16</i> |          |         |      | <i>eds16</i> |      |         |      |
|---------|------------|-------------|----------|---------|------|-------------------|----------|---------|------|--------------|------|---------|------|
|         |            | RNA         |          | protein |      | RNA               |          | protein |      | RNA          |      | protein |      |
| Name    | ATG number | log2FC      | q        | log2FC  | q    | log2FC            | q        | log2FC  | q    | log2FC       | q    | log2FC  | q    |
| UGT89B1 | AT1G73880  | 0.28        | 0.50     |         |      | 0.48              | 0.24     |         |      | -0.12        | 0.90 |         |      |
| UGT73B4 | AT2G15490  | 1.77        | 1.76E-03 |         |      | 3.47              | 3.99E-11 |         |      | 0.13         | NA   |         |      |
| UGT71B1 | AT3G21750  | 0.04        | 0.84     | 0.33    | 0.40 | 0.33              | 0.06     | 0.45    | 0.22 | -0.16        | 0.60 | 0.31    | 0.39 |
| UGT72B1 | AT4G01070  | -0.21       | 0.34     | -0.24   | 0.55 | -0.25             | 0.28     | 0.22    | 0.35 | -0.10        | 0.82 | 0.31    | 0.31 |
| UGT73B3 | AT4G34131  | 1.13        | 1.28E-03 | -0.02   | 0.94 | 1.35              | 1.38E-04 | 0.24    | 0.19 | -0.99        | 0.10 | -0.05   | 0.73 |
| UGT89A2 | AT5G03490  | -0.25       | 0.27     |         |      | 0.03              | 0.93     |         |      | -0.31        | 0.39 |         |      |
