# Supplementary material
Source: PubMed Central journal article supplement (PMC5488868)
Supplement: NIHMS863237-supplement-Supp_TableS7.pdf [file NIHMS863237-supplement-Supp_TableS7.pdf]

Table S7: MRM parameters for targeted analysis of charged hydrophilic metabolites. MRM: multiple reaction monitoring, m/z Q1: nominal mass to charge ratio of precursor ion (Quadrupole 1), m/z Q2: nominal mass to charge ratio of fragment ion (Quadrupole 2), RT: retention time, CE [V]: collision energy in Volts, DP [V]: declustering potential in Volts, CXP [V]: cell exit potential in Volts

| Biocyc ID                                | m/z Q1 | m/z Q3 | Expected RT (min) | CE [V] | CXP [V] | DP [V] |
|------------------------------------------|--------|--------|-------------------|--------|---------|--------|
| 2-PG                                     | 185    | 79     | 12.9              | -20    | -35     | -25    |
| G3P                                      | 185.1  | 96.7   | 13.2              | -22    | -7      | -30    |
| CPD-2961                                 | 275    | 79     | 13.1              | -66    | -5      | -60    |
| CIS-ACONITATE                            | 173.1  | 84.9   | 13.4              | -18    | -5      | -35    |
| Adenosine                                | 266.2  | 133.9  | 2.7               | -12    | -1      | -70    |
| ADENYLOSUCC                              | 462.3  | 133.9  | 15.8              | -62    | -7      | -85    |
| ADP                                      | 426.2  | 78.9   | 13.2              | -66    | -3      | -75    |
| 2-KETOGLUTARATE                          | 145    | 101    | 10.7              | -12    | -13     | -10    |
| ALA                                      | 148    | 88.1   | 1.6               | -8     | -3      | -20    |
| AMP                                      | 346.2  | 78.8   | 8.9               | -52    | -3      | -70    |
| ARG                                      | 173.2  | 131    | 1.6               | -18    | -7      | -50    |
| L-ARGININO-SUCCINATE                     | 289.3  | 271.3  | 2.7               | -14    | -15     | -55    |
| ASN                                      | 131.1  | 87.1   | 1.6               | -16    | -11     | -75    |
| L-ASPARTATE                              | 132    | 88     | 1.9               | -18    | -13     | -40    |
| ATP                                      | 506.2  | 158.8  | 15.6              | -38    | -9      | -80    |
| CARBAMYUL-L-ASPARTATE                    | 175.1  | 131.8  | 10                | -16    | -7      | -25    |
| CAMP                                     | 328.2  | 133.9  | 7.6               | -36    | -5      | -125   |
| CDP                                      | 402.2  | 78.9   | 12.8              | -70    | -5      | -65    |
| 4-CYTIDINE-5-DIPHOSPHO-2-C               | 520.1  | 78.9   | 4.6               | -108   | -9      | -120   |
| 2-PHOSPHO-4-CYTIDINE-5-DIPHOSPHO-2-C-MET | 600    | 78.9   | 16                | -126   | -19     | -115   |
| CGMP                                     | 344.2  | 150    | 6.4               | -34    | -11     | -70    |
| CIT                                      | 191    | 87     | 14.1              | -22    | -15     | -35    |
| L-CITRULLINE                             | 174.2  | 131    | 1.6               | -18    | -7      | -35    |
| CMP                                      | 322.2  | 79     | 7                 | -68    | -5      | -65    |
| CTP                                      | 482.2  | 158.8  | 15.4              | -36    | -9      | -85    |
| Cytidine                                 | 242.2  | 108.9  | 1.8               | -18    | -5      | -70    |
| DIHYDROXY-ACETONE-PHOSPHATE              | 169.1  | 97     | 8.5               | -14    | -11     | -35    |
| DI-H-OROTATE                             | 157.1  | 112.7  | 3.8               | -10    | -5      | -40    |
| CPD-4211                                 | 115.1  | 71     | 10.6              | -12    | -13     | -5     |
| TDP                                      | 401.2  | 78.8   | 13.1              | -68    | -3      | -70    |
| TMP                                      | 321.2  | 78.8   | 8.7               | -58    | -3      | -65    |
| TTP                                      | 481.2  | 158.7  | 15.4              | -38    | -9      | -80    |
| DEOXYXYLULOSE-5P                         | 213    | 97     | 8.8               | -16    | -21     | -5     |
| ERYTHROSE-4P                             | 199.1  | 96.8   | 6.1               | -12    | -5      | -40    |
| FAD                                      | 784.5  | 79     | 13.4              | -130   | -1      | -60    |
| FRUCTOSE-16-DIPHOSPHATE                  | 339.1  | 96.9   | 15.1              | -22    | -11     | -35    |
| FUM                                      | 115.1  | 71     | 10.6              | -12    | -13     | -5     |
| CPD-448                                  | 259.1  | 240.8  | 6.7               | -16    | -15     | -30    |
| D-glucopyranose-6-phosphate              | 259.1  | 97     | 5.9               | -18    | -13     | -65    |
| GLUCOSAMINE-1P                           | 258.2  | 78.9   | 2.7               | -42    | -1      | -55    |
| GAP                                      | 169    | 97     | 6.5               | -12    | -5      | -30    |
| GDP                                      | 442.2  | 78.9   | 12.9              | -70    | -3      | -85    |
| GLT                                      | 146    | 102    | 2.1               | -18    | -9      | -80    |
| GLYCEROL-3P                              | 171.1  | 78.8   | 6.3               | -24    | -1      | -45    |
| GLN                                      | 145.1  | 108.9  | 1.6               | -18    | -5      | -30    |
| glucose                                  | 178.9  | 89     | 1.6               | -12    | -13     | -50    |
| GLY                                      | 74.1   | 74     | 1.6               | -13    | -3      | -36    |
| GMP                                      | 362.2  | 78.9   | 7.8               | -66    | -5      | -65    |
| GLUTATHIONE                              | 306.3  | 143    | 4.7               | -26    | -7      | -5     |
| OXIDIZED-GLUTATHIONE                     | 611.6  | 306.1  | 9.5               | -34    | -7      | -35    |
| GTP                                      | 522.2  | 158.8  | 15.4              | -48    | -9      | -90    |
| Guanosine                                | 282.2  | 149.9  | 2.1               | -26    | -7      | -80    |
| HIS                                      | 154.2  | 93     | 1.8               | -24    | -3      | -40    |
| HYDROXY-METHYL-BUTENYL-DIP               | 261    | 79     | 13.3              | -52    | -9      | -40    |
| IMP                                      | 347.2  | 134.8  | 8.1               | -38    | -7      | -70    |
| THREO-DS-ISO-CITRATE                     | 191.1  | 73     | 14.4              | -28    | -31     | -45    |
| L-LACTATE                                | 89.1   | 42.9   | 3.8               | -12    | -5      | -15    |
| LYS                                      | 145.2  | 101    | 1.6               | -14    | -5      | -65    |
| MAL                                      | 133.1  | 115    | 9.9               | -16    | -5      | -20    |
| 2C-METH-D-ERYTHRITOL-CYCLODIPHOSPHATE    | 277    | 79     | 10.9              | -64    | -37     | -45    |
| 2-C-METHYL-D-ERYTHRITOL-4-PHOSPHATE      | 215    | 78.9   | 6.9               | -56    | -9      | -40    |
| MET                                      | 148.2  | 47     | 1.8               | -24    | -5      | -45    |
| NAD                                      | 662.4  | 540.1  | 5.5               | -22    | -15     | -45    |
| NADH                                     | 664.4  | 78.9   | 11.4              | -124   | -1      | -100   |
| NADP                                     | 742.4  | 620    | 13.4              | -22    | -17     | -55    |
| NADPH                                    | 744.4  | 79     | 16.3              | -118   | -3      | -110   |
| L-ORNITHINE                              | 131.2  | 82.9   | 1.7               | -20    | -5      | -60    |
| PAN                                      | 218.2  | 88.1   | 7                 | -18    | -5      | -55    |
| L-1-GLYCERO-PHOSPHORYLCHOLINE            | 242.2  | 167.9  | 2.3               | -12    | -9      | -40    |
| PHOSPHO-ENOL-PYRUVATE                    | 167    | 78.8   | 13.9              | -16    | -9      | -20    |
| PHE                                      | 164.2  | 103    | 2.4               | -24    | -5      | -55    |
| PRO                                      | 114.1  | 86     | 1.6               | -18    | -3      | -55    |
| PRPP                                     | 389.1  | 176.8  | 16.8              | -28    | -9      | -55    |
| RIBOSE-5P                                | 229.1  | 96.8   | 6.1               | -20    | -5      | -35    |
| D-RIBULOSE-15-P2                         | 309.1  | 97     | 15.7              | -20    | -27     | -35    |
| RIBOSE-5P + XYLULOSE-5-PHOSPHATE         | 229.1  | 96.8   | 7.6               | -18    | -15     | -45    |
| D-SEDOHEPTULOSE-7-P                      | 289.2  | 97     | 6.3               | -22    | -5      | -50    |
| ADENOSYL-HOMO-CYS                        | 383.4  | 133.9  | 2.5               | -36    | -7      | -80    |
| SER                                      | 104.1  | 74     | 1.6               | -16    | -3      | -20    |
| SUC                                      | 117.1  | 73     | 9.9               | -16    | -7      | -25    |
| THR                                      | 118.1  | 73.9   | 1.6               | -18    | -3      | -25    |
| TRP                                      | 203.2  | 116.2  | 3.5               | -22    | -7      | -50    |
| TYR                                      | 180.2  | 118.9  | 1.9               | -24    | -5      | -60    |
| UDP                                      | 403.2  | 78.8   | 13.1              | -68    | -3      | -75    |
| CPD-12575                                | 565.3  | 323    | 10.2              | -36    | -11     | -125   |
| UMP                                      | 323.2  | 79     | 7.8               | -68    | -5      | -65    |
| URIDINE                                  | 243.2  | 109.9  | 1.9               | -22    | -5      | -65    |
| UTP                                      | 483.1  | 158.8  | 15.5              | -38    | -9      | -90    |
| XANTHOSINE-5-PHOSPHATE                   | 363.2  | 151.1  | 12.9              | -36    | -5      | -60    |
| D-SEDOHEPTULOSE-1-7-P2                   | 369    | 97     | 16                | -20    | -27     | -35    |
